# Supplementary material
Source: PubMed Central journal article supplement (PMC6858549)
Supplement: NIHMS1537925-supplement-2.pdf [file NIHMS1537925-supplement-2.pdf]

## Supplementary Results

### **AD-associated changes in circRNA expression demonstrate independence from AD-associated changes in estimated cell-type proportion.**

AD pathology results in dramatic changes in brain cell-type proportions which can be estimated in RNA-seq data using computational deconvolution approaches<sup>34</sup>. To demonstrate that AD-associated changes in circRNA expression are independent from AD-associated changes in brain cell-type proportions, we performed regression analyses with models including the differential expression covariates, library size-normalized circRNA counts, and computationally deconvoluted estimates of brain cell-type proportions. We performed these regression analyses in the discovery parietal and the replication BM44 datasets for all 148 meta-analysis significant CDR-association circRNAs. We present the fixed effects meta-analysis of these results in Supplementary Table 17. We identify 106 CDR-associated circRNAs that retain a significant association (p-value < 0.05, Supplementary Table 17) when included in the same model as brain cell-type proportion estimates, for example *circHOMER1* (meta p-value:  $8.15 \times 10^{-13}$ ) and *circDOCK1* (meta p-value:  $1.03 \times 10^{-05}$ ). These results demonstrate that the association between the majority of AD-associated circRNAs and CDR is independent from the CDR-associated changes in estimated cell-type proportions.

### **Changes in circRNA expression are correlated with the AD neuropathological quantitative trait: mean number of amyloid plaques.**

The MSBB dataset includes an additional AD neuropathological quantitative trait: mean number of amyloid beta plaques. We identified 95 circRNAs (Supplementary Table 36) that were significantly correlated with mean number of plaques, e.g. *circHOMER1* ( $\log_2$  fold change per unit of mean number of plaques: -0.02, p-value:  $4.70 \times 10^{-07}$ ) in the BM44 subset of the dataset ( $n_{\text{PlaqueMean}} = 195$ ). We similarly identified circRNAs correlated with mean number of plaques in the other cortical regions included in the MSBB dataset (Supplementary Tables 37-39). Altogether, we identified 12 circRNAs that were significantly correlated with mean number of amyloid plaques in all four cortical regions (Supplementary Figure 7).

### **Significantly associated circRNAs explain more of the variation in mean number of amyloid plaques than number of *APOE4* alleles or estimated neuronal proportion.**

We investigated whether those circRNAs we identified as significantly associated with the mean number of plaques explained more of the variation in the mean number of plaques, compared to the known contributors: number of *APOE4* alleles and estimated proportion of neurons (EstNeuron)<sup>34</sup>.

Consistent with our results from the other two AD quantitative traits (CDR and Braak score), the top 10 most significant PlaqueMean-associated circRNAs cumulatively explained more of the observed

variation in mean number of amyloid plaques across all four cortical regions in the MSBB dataset (Supplementary Tables 58-61) compared to *APOE4* and EstNeuron.

**Significantly associated circRNAs explain more of the variation in Braak score than number of *APOE4* alleles or estimated neuronal proportion in individuals with ADAD.**

We also investigated whether those circRNAs we identified as significantly associated with Braak score-adjusted ADAD versus AD case status explained more of the variation in Braak score, compared to the known contributors: number of *APOE4* alleles and estimated proportion of neurons (EstNeuron)<sup>34</sup> in the individuals with ADAD ( $n_{\text{ADAD with Braak}} = 17$ ). Consistent with our results for Braak score in the discovery and replication datasets, the top 10 most significant Braak score-adjusted, ADAD-associated circRNAs cumulatively explained more of the observed variation in Braak score (Supplementary Table 62) compared to *APOE4* and EstNeuron.

**AD-associated circRNAs improve sensitivity and specificity of logistic models predicting AD case status.**

Given the robust association between circRNA expression and AD traits, we investigated if including circRNAs improved the sensitivity and specificity of logistic models predicting AD case status (Supplementary Figure 10, Supplementary Table 63). Our base, demographic-genetic model included the differential expression covariates (PMI, TIN, AOD, batch, sex, genetic ancestry) as well as number of *APOE4* alleles and yielded good predictive value – as measured by area under the receiver operator characteristic curve (AUC) - in both the discovery ( $n_{\text{control}} = 13$ ,  $n_{\text{AD}} = 83$ ,  $\text{AUC}_{\text{base}}: 0.90$ ) and replication ( $n_{\text{control}} = 40$ ,  $n_{\text{Definite AD}} = 89$ ,  $\text{AUC}_{\text{base}}: 0.84$ ) datasets. Interestingly, models that only included normalized counts for the top 10 circRNAs most significantly associated with CDR on meta-analysis, yielded better predictive values in both the discovery ( $\text{AUC}_{\text{circ}}: 0.97$ ) dataset and the replication ( $\text{AUC}_{\text{circ}}: 0.88$ ) dataset. Finally, combining the models yielded the best predictive ability in both the discovery ( $\text{AUC}_{\text{base+circ}}: 1.00$ ) and replication ( $\text{AUC}_{\text{base+circ}}: 0.98$ ) datasets. We observed similar results for the other MSBB cortical regions with the addition of circRNA expression information increasing the predictive ability above the base demographic-genetic model (Supplementary Figure 10). These results indicate that cortical circRNA expression is highly predictive of AD case status.

Supplementary Table 74 Multiple MicroRNA Binding Sites are Predicted in the Sequences of AD-associated circRNAs

| circRNA           | miRNA                 | Predicted Binding Sites |
|-------------------|-----------------------|-------------------------|
| <i>circADGRB3</i> | let-7a-2-3p/let-7g-3p | 1                       |
| <i>circADGRB3</i> | let-7c-3p             | 1                       |
| <i>circADGRB3</i> | miR-1-5p              | 2                       |
| <i>circADGRB3</i> | miR-10-5p             | 1                       |
| <i>circADGRB3</i> | miR-103-3p/107        | 1                       |
| <i>circADGRB3</i> | miR-103a-2-5p         | 1                       |
| <i>circADGRB3</i> | miR-1178-3p           | 1                       |
| <i>circADGRB3</i> | miR-1184              | 2                       |
| <i>circADGRB3</i> | miR-1199-5p/6751-3p   | 1                       |
| <i>circADGRB3</i> | miR-1200              | 2                       |
| <i>circADGRB3</i> | miR-1205              | 2                       |
| <i>circADGRB3</i> | miR-1207-3p           | 1                       |
| <i>circADGRB3</i> | miR-1208              | 1                       |
| <i>circADGRB3</i> | miR-122-3p            | 1                       |
| <i>circADGRB3</i> | miR-1224-5p           | 1                       |
| <i>circADGRB3</i> | miR-1226-3p           | 2                       |
| <i>circADGRB3</i> | miR-1226-5p           | 1                       |
| <i>circADGRB3</i> | miR-1227-3p           | 1                       |
| <i>circADGRB3</i> | miR-1228-3p           | 1                       |
| <i>circADGRB3</i> | miR-1229-3p           | 1                       |
| <i>circADGRB3</i> | miR-1234-3p/7107-5p   | 1                       |
| <i>circADGRB3</i> | miR-1236-3p           | 1                       |
| <i>circADGRB3</i> | miR-1238-3p           | 2                       |
| <i>circADGRB3</i> | miR-124-5p            | 2                       |
| <i>circADGRB3</i> | miR-1243              | 1                       |
| <i>circADGRB3</i> | miR-125-5p            | 1                       |
| <i>circADGRB3</i> | miR-1252-3p           | 1                       |
| <i>circADGRB3</i> | miR-1255b-2-3p        | 2                       |
| <i>circADGRB3</i> | miR-1266-3p           | 1                       |
| <i>circADGRB3</i> | miR-1272              | 1                       |
| <i>circADGRB3</i> | miR-1273g-3p          | 3                       |
| <i>circADGRB3</i> | miR-1276              | 1                       |

|                   |                                      |   |
|-------------------|--------------------------------------|---|
| <i>circADGRB3</i> | miR-1284                             | 1 |
| <i>circADGRB3</i> | miR-1288-5p                          | 1 |
| <i>circADGRB3</i> | miR-1291/6775-3p                     | 1 |
| <i>circADGRB3</i> | miR-130-3p/301-3p/454-3p             | 1 |
| <i>circADGRB3</i> | miR-1302/4298                        | 1 |
| <i>circADGRB3</i> | miR-1304-3p                          | 1 |
| <i>circADGRB3</i> | miR-1322                             | 1 |
| <i>circADGRB3</i> | miR-136-5p                           | 3 |
| <i>circADGRB3</i> | miR-137                              | 1 |
| <i>circADGRB3</i> | miR-140-3p.2                         | 2 |
| <i>circADGRB3</i> | miR-141-5p                           | 1 |
| <i>circADGRB3</i> | miR-142-5p                           | 1 |
| <i>circADGRB3</i> | miR-143-5p                           | 2 |
| <i>circADGRB3</i> | miR-145-3p                           | 2 |
| <i>circADGRB3</i> | miR-146b-3p                          | 1 |
| <i>circADGRB3</i> | miR-148-3p/152-3p                    | 1 |
| <i>circADGRB3</i> | miR-148a-5p                          | 1 |
| <i>circADGRB3</i> | miR-148b-5p/6874-3p                  | 1 |
| <i>circADGRB3</i> | miR-149-5p                           | 1 |
| <i>circADGRB3</i> | miR-15-5p/16-5p/195-5p/424-5p/497-5p | 1 |
| <i>circADGRB3</i> | miR-150-5p                           | 1 |
| <i>circADGRB3</i> | miR-1537-5p                          | 1 |
| <i>circADGRB3</i> | miR-1539                             | 1 |
| <i>circADGRB3</i> | miR-16-2-3p/195-3p                   | 4 |
| <i>circADGRB3</i> | miR-17-3p                            | 2 |
| <i>circADGRB3</i> | miR-18-5p                            | 1 |
| <i>circADGRB3</i> | miR-181-3p/4420                      | 1 |
| <i>circADGRB3</i> | miR-181-5p                           | 1 |
| <i>circADGRB3</i> | miR-182-3p                           | 1 |
| <i>circADGRB3</i> | miR-185-3p                           | 2 |
| <i>circADGRB3</i> | miR-18a-3p                           | 2 |
| <i>circADGRB3</i> | miR-192-5p/215-5p                    | 1 |
| <i>circADGRB3</i> | miR-193-3p                           | 1 |
| <i>circADGRB3</i> | miR-197-3p                           | 1 |
| <i>circADGRB3</i> | miR-204-3p/4646-5p                   | 1 |
| <i>circADGRB3</i> | miR-205-5p                           | 2 |
| <i>circADGRB3</i> | miR-20a-3p                           | 3 |
| <i>circADGRB3</i> | miR-2113                             | 1 |

|                   |                                     |   |
|-------------------|-------------------------------------|---|
| <i>circADGRB3</i> | miR-2114-3p                         | 1 |
| <i>circADGRB3</i> | miR-2114-5p                         | 1 |
| <i>circADGRB3</i> | miR-2116-3p                         | 1 |
| <i>circADGRB3</i> | miR-2116-5p                         | 2 |
| <i>circADGRB3</i> | miR-217                             | 1 |
| <i>circADGRB3</i> | miR-218-1-3p                        | 1 |
| <i>circADGRB3</i> | miR-218-2-3p                        | 1 |
| <i>circADGRB3</i> | miR-218-5p                          | 1 |
| <i>circADGRB3</i> | miR-22-3p                           | 1 |
| <i>circADGRB3</i> | miR-22-5p                           | 2 |
| <i>circADGRB3</i> | miR-2276-5p                         | 1 |
| <i>circADGRB3</i> | miR-2278                            | 1 |
| <i>circADGRB3</i> | miR-23-3p                           | 1 |
| <i>circADGRB3</i> | miR-25-3p/32-5p/92-3p/363-3p/367-3p | 2 |
| <i>circADGRB3</i> | miR-27-3p                           | 1 |
| <i>circADGRB3</i> | miR-296-3p                          | 2 |
| <i>circADGRB3</i> | miR-297                             | 1 |
| <i>circADGRB3</i> | miR-30-3p                           | 1 |
| <i>circADGRB3</i> | miR-3064-3p                         | 1 |
| <i>circADGRB3</i> | miR-3064-5p                         | 1 |
| <i>circADGRB3</i> | miR-3074-5p                         | 2 |
| <i>circADGRB3</i> | miR-3124-3p                         | 1 |
| <i>circADGRB3</i> | miR-3126-5p                         | 1 |
| <i>circADGRB3</i> | miR-3127-5p                         | 2 |
| <i>circADGRB3</i> | miR-3130-3p                         | 1 |
| <i>circADGRB3</i> | miR-3145-5p                         | 3 |
| <i>circADGRB3</i> | miR-3149                            | 1 |
| <i>circADGRB3</i> | miR-3150b-3p                        | 1 |
| <i>circADGRB3</i> | miR-3152-3p                         | 1 |
| <i>circADGRB3</i> | miR-3157-3p                         | 1 |
| <i>circADGRB3</i> | miR-3158-5p                         | 2 |
| <i>circADGRB3</i> | miR-3160-5p                         | 1 |
| <i>circADGRB3</i> | miR-3168                            | 1 |
| <i>circADGRB3</i> | miR-3169                            | 1 |
| <i>circADGRB3</i> | miR-3173-5p                         | 1 |
| <i>circADGRB3</i> | miR-3177-5p                         | 1 |
| <i>circADGRB3</i> | miR-3191-5p                         | 2 |
| <i>circADGRB3</i> | miR-3192-5p                         | 1 |

|                   |                                   |   |
|-------------------|-----------------------------------|---|
| <i>circADGRB3</i> | miR-3200-3p                       | 1 |
| <i>circADGRB3</i> | miR-324-3p/1913                   | 2 |
| <i>circADGRB3</i> | miR-328-3p                        | 1 |
| <i>circADGRB3</i> | miR-33-5p                         | 2 |
| <i>circADGRB3</i> | miR-335-3p                        | 2 |
| <i>circADGRB3</i> | miR-339-5p                        | 1 |
| <i>circADGRB3</i> | miR-34-5p/449-5p                  | 1 |
| <i>circADGRB3</i> | miR-345-5p                        | 1 |
| <i>circADGRB3</i> | miR-34a-3p                        | 1 |
| <i>circADGRB3</i> | miR-34b-3p                        | 1 |
| <i>circADGRB3</i> | miR-34c-3p                        | 1 |
| <i>circADGRB3</i> | miR-3605-3p                       | 1 |
| <i>circADGRB3</i> | miR-3607-3p                       | 1 |
| <i>circADGRB3</i> | miR-3607-5p                       | 1 |
| <i>circADGRB3</i> | miR-3616-3p                       | 1 |
| <i>circADGRB3</i> | miR-3617-3p                       | 1 |
| <i>circADGRB3</i> | miR-3619-3p                       | 2 |
| <i>circADGRB3</i> | miR-3620-3p                       | 1 |
| <i>circADGRB3</i> | miR-3622a-3p/3622b-3p             | 1 |
| <i>circADGRB3</i> | miR-3646                          | 1 |
| <i>circADGRB3</i> | miR-3649                          | 2 |
| <i>circADGRB3</i> | miR-3650                          | 1 |
| <i>circADGRB3</i> | miR-3654                          | 1 |
| <i>circADGRB3</i> | miR-3657                          | 1 |
| <i>circADGRB3</i> | miR-3660/4526                     | 2 |
| <i>circADGRB3</i> | miR-3663-3p                       | 2 |
| <i>circADGRB3</i> | miR-3667-3p                       | 1 |
| <i>circADGRB3</i> | miR-3689a-5p/3689b-5p/3689e/3689f | 1 |
| <i>circADGRB3</i> | miR-3689d/6851-5p                 | 1 |
| <i>circADGRB3</i> | miR-369-5p                        | 1 |
| <i>circADGRB3</i> | miR-3692-3p                       | 1 |
| <i>circADGRB3</i> | miR-3692-5p                       | 1 |
| <i>circADGRB3</i> | miR-374a-3p                       | 2 |
| <i>circADGRB3</i> | miR-374b-3p                       | 1 |
| <i>circADGRB3</i> | miR-377-3p                        | 1 |
| <i>circADGRB3</i> | miR-378-3p                        | 1 |
| <i>circADGRB3</i> | miR-378a-5p                       | 2 |
| <i>circADGRB3</i> | miR-378g                          | 1 |

|                   |                                              |   |
|-------------------|----------------------------------------------|---|
| <i>circADGRB3</i> | miR-3908                                     | 1 |
| <i>circADGRB3</i> | miR-3912-5p                                  | 1 |
| <i>circADGRB3</i> | miR-3915                                     | 1 |
| <i>circADGRB3</i> | miR-3918                                     | 1 |
| <i>circADGRB3</i> | miR-3920                                     | 1 |
| <i>circADGRB3</i> | miR-3922-5p                                  | 1 |
| <i>circADGRB3</i> | miR-3941                                     | 1 |
| <i>circADGRB3</i> | miR-3942-5p                                  | 1 |
| <i>circADGRB3</i> | miR-3945                                     | 2 |
| <i>circADGRB3</i> | miR-412-3p/6754-3p                           | 2 |
| <i>circADGRB3</i> | miR-4252                                     | 1 |
| <i>circADGRB3</i> | miR-4253/6862-5p                             | 2 |
| <i>circADGRB3</i> | miR-4255                                     | 1 |
| <i>circADGRB3</i> | miR-4257                                     | 1 |
| <i>circADGRB3</i> | miR-4273/7156-5p                             | 2 |
| <i>circADGRB3</i> | miR-4286                                     | 1 |
| <i>circADGRB3</i> | miR-4290                                     | 1 |
| <i>circADGRB3</i> | miR-4297/5581-5p                             | 1 |
| <i>circADGRB3</i> | miR-4301                                     | 1 |
| <i>circADGRB3</i> | miR-4302                                     | 2 |
| <i>circADGRB3</i> | miR-431-3p                                   | 1 |
| <i>circADGRB3</i> | miR-4310/7157-5p                             | 1 |
| <i>circADGRB3</i> | miR-4311                                     | 1 |
| <i>circADGRB3</i> | miR-4317                                     | 2 |
| <i>circADGRB3</i> | miR-432-5p                                   | 1 |
| <i>circADGRB3</i> | miR-4324                                     | 1 |
| <i>circADGRB3</i> | miR-4325                                     | 1 |
| <i>circADGRB3</i> | miR-4326                                     | 2 |
| <i>circADGRB3</i> | miR-4328                                     | 2 |
| <i>circADGRB3</i> | miR-433-3p                                   | 1 |
| <i>circADGRB3</i> | miR-4419a/4510/6127/6129/6130/6133           | 1 |
| <i>circADGRB3</i> | miR-4433a-5p                                 | 1 |
| <i>circADGRB3</i> | miR-4433b-5p                                 | 1 |
| <i>circADGRB3</i> | miR-4436b-3p/4632-5p/6735-5p/6879-5p/7843-5p | 2 |
| <i>circADGRB3</i> | miR-4436b-5p                                 | 2 |
| <i>circADGRB3</i> | miR-4446-5p                                  | 1 |
| <i>circADGRB3</i> | miR-4449                                     | 1 |
| <i>circADGRB3</i> | miR-4453/4538                                | 1 |

|                   |                       |   |
|-------------------|-----------------------|---|
| <i>circADGRB3</i> | miR-4457              | 2 |
| <i>circADGRB3</i> | miR-4470              | 1 |
| <i>circADGRB3</i> | miR-4486              | 1 |
| <i>circADGRB3</i> | miR-4495              | 1 |
| <i>circADGRB3</i> | miR-4506              | 1 |
| <i>circADGRB3</i> | miR-4520-3p           | 1 |
| <i>circADGRB3</i> | miR-4524-5p           | 1 |
| <i>circADGRB3</i> | miR-455-3p.2          | 2 |
| <i>circADGRB3</i> | miR-455-5p            | 1 |
| <i>circADGRB3</i> | miR-4632-3p           | 1 |
| <i>circADGRB3</i> | miR-4638-3p           | 1 |
| <i>circADGRB3</i> | miR-4639-3p           | 3 |
| <i>circADGRB3</i> | miR-4641              | 1 |
| <i>circADGRB3</i> | miR-4649-3p           | 2 |
| <i>circADGRB3</i> | miR-4659a-3p/4659b-3p | 4 |
| <i>circADGRB3</i> | miR-4659a-5p/4659b-5p | 1 |
| <i>circADGRB3</i> | miR-4660              | 1 |
| <i>circADGRB3</i> | miR-4663              | 1 |
| <i>circADGRB3</i> | miR-4666b             | 1 |
| <i>circADGRB3</i> | miR-4669              | 1 |
| <i>circADGRB3</i> | miR-4672              | 1 |
| <i>circADGRB3</i> | miR-4677-5p           | 2 |
| <i>circADGRB3</i> | miR-4680-5p           | 2 |
| <i>circADGRB3</i> | miR-4682              | 1 |
| <i>circADGRB3</i> | miR-4687-3p           | 1 |
| <i>circADGRB3</i> | miR-4689/6858-5p      | 1 |
| <i>circADGRB3</i> | miR-4691-5p/6792-3p   | 2 |
| <i>circADGRB3</i> | miR-4695-3p           | 1 |
| <i>circADGRB3</i> | miR-4695-5p           | 1 |
| <i>circADGRB3</i> | miR-4700-3p           | 1 |
| <i>circADGRB3</i> | miR-4711-5p           | 1 |
| <i>circADGRB3</i> | miR-4715-3p           | 1 |
| <i>circADGRB3</i> | miR-4717-3p           | 1 |
| <i>circADGRB3</i> | miR-4718              | 1 |
| <i>circADGRB3</i> | miR-4721              | 1 |
| <i>circADGRB3</i> | miR-4725-5p           | 2 |
| <i>circADGRB3</i> | miR-4727-5p           | 1 |
| <i>circADGRB3</i> | miR-4731-3p/4801      | 1 |



|                   |                             |   |
|-------------------|-----------------------------|---|
| <i>circADGRB3</i> | miR-4732-3p                 | 1 |
| <i>circADGRB3</i> | miR-4733-3p                 | 2 |
| <i>circADGRB3</i> | miR-4753-3p                 | 1 |
| <i>circADGRB3</i> | miR-4757-5p/6744-3p         | 1 |
| <i>circADGRB3</i> | miR-4759                    | 1 |
| <i>circADGRB3</i> | miR-4761-3p                 | 2 |
| <i>circADGRB3</i> | miR-4768-5p/6833-3p         | 2 |
| <i>circADGRB3</i> | miR-4776-3p                 | 1 |
| <i>circADGRB3</i> | miR-4778-3p                 | 3 |
| <i>circADGRB3</i> | miR-4779                    | 1 |
| <i>circADGRB3</i> | miR-4780                    | 2 |
| <i>circADGRB3</i> | miR-4793-3p                 | 1 |
| <i>circADGRB3</i> | miR-4797-5p                 | 1 |
| <i>circADGRB3</i> | miR-4803                    | 1 |
| <i>circADGRB3</i> | miR-483-3p.2                | 1 |
| <i>circADGRB3</i> | miR-488-5p                  | 1 |
| <i>circADGRB3</i> | miR-493-5p                  | 1 |
| <i>circADGRB3</i> | miR-497-3p                  | 2 |
| <i>circADGRB3</i> | miR-4999-5p                 | 1 |
| <i>circADGRB3</i> | miR-5000-3p                 | 1 |
| <i>circADGRB3</i> | miR-5001-3p                 | 1 |
| <i>circADGRB3</i> | miR-5003-3p                 | 1 |
| <i>circADGRB3</i> | miR-500a-3p                 | 1 |
| <i>circADGRB3</i> | miR-5010-3p                 | 1 |
| <i>circADGRB3</i> | miR-5011-3p                 | 1 |
| <i>circADGRB3</i> | miR-503-5p                  | 1 |
| <i>circADGRB3</i> | miR-504-5p.1                | 1 |
| <i>circADGRB3</i> | miR-506-5p                  | 1 |
| <i>circADGRB3</i> | miR-508-5p                  | 3 |
| <i>circADGRB3</i> | miR-509-3-5p/509-5p/4418    | 1 |
| <i>circADGRB3</i> | miR-510-5p                  | 1 |
| <i>circADGRB3</i> | miR-511-3p                  | 1 |
| <i>circADGRB3</i> | miR-513a-3p/513c-3p/3606-3p | 1 |
| <i>circADGRB3</i> | miR-513a-5p                 | 1 |
| <i>circADGRB3</i> | miR-518a-5p/527             | 1 |
| <i>circADGRB3</i> | miR-519d-5p                 | 1 |
| <i>circADGRB3</i> | miR-532-3p                  | 1 |
| <i>circADGRB3</i> | miR-544a                    | 1 |

|                   |                                      |   |
|-------------------|--------------------------------------|---|
| <i>circADGRB3</i> | miR-544b                             | 1 |
| <i>circADGRB3</i> | miR-548au-3p                         | 1 |
| <i>circADGRB3</i> | miR-548aw                            | 1 |
| <i>circADGRB3</i> | miR-550b-2-5p                        | 1 |
| <i>circADGRB3</i> | miR-551-3p                           | 1 |
| <i>circADGRB3</i> | miR-552-3p                           | 1 |
| <i>circADGRB3</i> | miR-556-3p                           | 1 |
| <i>circADGRB3</i> | miR-5581-3p                          | 2 |
| <i>circADGRB3</i> | miR-5584-3p                          | 1 |
| <i>circADGRB3</i> | miR-5588-3p                          | 1 |
| <i>circADGRB3</i> | miR-5590-5p                          | 1 |
| <i>circADGRB3</i> | miR-5682                             | 1 |
| <i>circADGRB3</i> | miR-5683                             | 1 |
| <i>circADGRB3</i> | miR-5695                             | 1 |
| <i>circADGRB3</i> | miR-5697                             | 1 |
| <i>circADGRB3</i> | miR-578                              | 2 |
| <i>circADGRB3</i> | miR-583                              | 1 |
| <i>circADGRB3</i> | miR-585-5p                           | 1 |
| <i>circADGRB3</i> | miR-587                              | 2 |
| <i>circADGRB3</i> | miR-591                              | 2 |
| <i>circADGRB3</i> | miR-602                              | 1 |
| <i>circADGRB3</i> | miR-6068                             | 1 |
| <i>circADGRB3</i> | miR-6071                             | 2 |
| <i>circADGRB3</i> | miR-6076/6797-3p                     | 1 |
| <i>circADGRB3</i> | miR-612/1285-3p/3187-5p/5189-5p/6860 | 1 |
| <i>circADGRB3</i> | miR-6134                             | 1 |
| <i>circADGRB3</i> | miR-619-5p/6506-5p                   | 1 |
| <i>circADGRB3</i> | miR-624-3p                           | 1 |
| <i>circADGRB3</i> | miR-627-5p                           | 1 |
| <i>circADGRB3</i> | miR-628-5p                           | 1 |
| <i>circADGRB3</i> | miR-639                              | 2 |
| <i>circADGRB3</i> | miR-646                              | 1 |
| <i>circADGRB3</i> | miR-647                              | 2 |
| <i>circADGRB3</i> | miR-648                              | 1 |
| <i>circADGRB3</i> | miR-6499-3p                          | 3 |
| <i>circADGRB3</i> | miR-6504-3p                          | 1 |
| <i>circADGRB3</i> | miR-6509-3p                          | 2 |
| <i>circADGRB3</i> | miR-6512-5p                          | 2 |

|                   |                     |   |
|-------------------|---------------------|---|
| <i>circADGRB3</i> | miR-6515-3p         | 1 |
| <i>circADGRB3</i> | miR-653-3p          | 1 |
| <i>circADGRB3</i> | miR-656-3p          | 1 |
| <i>circADGRB3</i> | miR-664a-5p/4794    | 1 |
| <i>circADGRB3</i> | miR-670-3p          | 2 |
| <i>circADGRB3</i> | miR-6715a-3p        | 2 |
| <i>circADGRB3</i> | miR-6716-3p         | 1 |
| <i>circADGRB3</i> | miR-6719-3p         | 2 |
| <i>circADGRB3</i> | miR-6721-5p         | 2 |
| <i>circADGRB3</i> | miR-6724-5p/6773-5p | 1 |
| <i>circADGRB3</i> | miR-6726-3p         | 1 |
| <i>circADGRB3</i> | miR-6728-3p         | 3 |
| <i>circADGRB3</i> | miR-6730-3p         | 2 |
| <i>circADGRB3</i> | miR-6732-3p         | 1 |
| <i>circADGRB3</i> | miR-6733-3p         | 2 |
| <i>circADGRB3</i> | miR-6734-3p         | 1 |
| <i>circADGRB3</i> | miR-6734-5p         | 1 |
| <i>circADGRB3</i> | miR-6738-3p         | 1 |
| <i>circADGRB3</i> | miR-6739-3p         | 3 |
| <i>circADGRB3</i> | miR-6743-3p         | 1 |
| <i>circADGRB3</i> | miR-6746-3p         | 1 |
| <i>circADGRB3</i> | miR-6749-3p         | 2 |
| <i>circADGRB3</i> | miR-675-3p          | 1 |
| <i>circADGRB3</i> | miR-6758-3p         | 2 |
| <i>circADGRB3</i> | miR-6759-3p         | 1 |
| <i>circADGRB3</i> | miR-6760-3p         | 1 |
| <i>circADGRB3</i> | miR-6765-3p         | 1 |
| <i>circADGRB3</i> | miR-6771-3p         | 1 |
| <i>circADGRB3</i> | miR-6772-3p         | 1 |
| <i>circADGRB3</i> | miR-6776-3p         | 1 |
| <i>circADGRB3</i> | miR-6777-3p         | 3 |
| <i>circADGRB3</i> | miR-6778-3p         | 1 |
| <i>circADGRB3</i> | miR-6780b-3p        | 2 |
| <i>circADGRB3</i> | miR-6781-5p         | 1 |
| <i>circADGRB3</i> | miR-6785-3p         | 1 |
| <i>circADGRB3</i> | miR-6791-3p/6829-3p | 1 |
| <i>circADGRB3</i> | miR-6804-3p         | 1 |
| <i>circADGRB3</i> | miR-6809-3p         | 2 |

|                   |                     |   |
|-------------------|---------------------|---|
| <i>circADGRB3</i> | miR-6813-3p         | 1 |
| <i>circADGRB3</i> | miR-6815-3p         | 1 |
| <i>circADGRB3</i> | miR-6817-3p         | 1 |
| <i>circADGRB3</i> | miR-6819-3p/6877-3p | 1 |
| <i>circADGRB3</i> | miR-6823-5p         | 2 |
| <i>circADGRB3</i> | miR-6825-3p         | 1 |
| <i>circADGRB3</i> | miR-6828-3p         | 2 |
| <i>circADGRB3</i> | miR-6832-3p         | 1 |
| <i>circADGRB3</i> | miR-6834-5p         | 1 |
| <i>circADGRB3</i> | miR-6837-3p         | 2 |
| <i>circADGRB3</i> | miR-6842-3p         | 2 |
| <i>circADGRB3</i> | miR-6844            | 1 |
| <i>circADGRB3</i> | miR-6846-3p         | 1 |
| <i>circADGRB3</i> | miR-6847-3p         | 1 |
| <i>circADGRB3</i> | miR-6847-5p         | 1 |
| <i>circADGRB3</i> | miR-6849-3p         | 1 |
| <i>circADGRB3</i> | miR-6851-3p         | 1 |
| <i>circADGRB3</i> | miR-6859-3p         | 1 |
| <i>circADGRB3</i> | miR-6865-3p         | 1 |
| <i>circADGRB3</i> | miR-6867-5p         | 1 |
| <i>circADGRB3</i> | miR-6868-3p         | 2 |
| <i>circADGRB3</i> | miR-6873-5p         | 1 |
| <i>circADGRB3</i> | miR-6875-3p         | 4 |
| <i>circADGRB3</i> | miR-6877-5p         | 1 |
| <i>circADGRB3</i> | miR-6878-3p         | 1 |
| <i>circADGRB3</i> | miR-6880-3p         | 1 |
| <i>circADGRB3</i> | miR-6882-3p         | 1 |
| <i>circADGRB3</i> | miR-6882-5p         | 2 |
| <i>circADGRB3</i> | miR-6884-3p         | 2 |
| <i>circADGRB3</i> | miR-6890-3p         | 2 |
| <i>circADGRB3</i> | miR-6892-3p         | 1 |
| <i>circADGRB3</i> | miR-711             | 1 |
| <i>circADGRB3</i> | miR-7110-3p         | 1 |
| <i>circADGRB3</i> | miR-7112-3p         | 1 |
| <i>circADGRB3</i> | miR-7152-5p         | 2 |
| <i>circADGRB3</i> | miR-7154-5p         | 1 |
| <i>circADGRB3</i> | miR-7160-5p         | 1 |
| <i>circADGRB3</i> | miR-7162-3p         | 2 |

|                   |                 |   |
|-------------------|-----------------|---|
| <i>circADGRB3</i> | miR-764         | 1 |
| <i>circADGRB3</i> | miR-7641        | 1 |
| <i>circADGRB3</i> | miR-767-3p      | 1 |
| <i>circADGRB3</i> | miR-7703        | 1 |
| <i>circADGRB3</i> | miR-7845-5p     | 1 |
| <i>circADGRB3</i> | miR-7854-3p     | 1 |
| <i>circADGRB3</i> | miR-7855-5p     | 1 |
| <i>circADGRB3</i> | miR-7973        | 1 |
| <i>circADGRB3</i> | miR-7974        | 1 |
| <i>circADGRB3</i> | miR-7976        | 1 |
| <i>circADGRB3</i> | miR-7977        | 1 |
| <i>circADGRB3</i> | miR-8057        | 1 |
| <i>circADGRB3</i> | miR-8060        | 1 |
| <i>circADGRB3</i> | miR-8068        | 1 |
| <i>circADGRB3</i> | miR-8077        | 1 |
| <i>circADGRB3</i> | miR-8083        | 1 |
| <i>circADGRB3</i> | miR-874-3p      | 1 |
| <i>circADGRB3</i> | miR-885-3p      | 1 |
| <i>circADGRB3</i> | miR-890         | 1 |
| <i>circADGRB3</i> | miR-892-5p      | 1 |
| <i>circADGRB3</i> | miR-892b        | 1 |
| <i>circADGRB3</i> | miR-9-5p        | 1 |
| <i>circADGRB3</i> | miR-93-3p       | 1 |
| <i>circADGRB3</i> | miR-935         | 1 |
| <i>circADGRB3</i> | miR-937-5p      | 1 |
| <i>circADGRB3</i> | miR-942-5p      | 2 |
| <i>circADGRB3</i> | miR-101-3p.1    | 1 |
| <i>circADGRB3</i> | miR-105-5p      | 1 |
| <i>circADGRB3</i> | miR-1203        | 1 |
| <i>circADGRB3</i> | miR-122-5p      | 1 |
| <i>circADGRB3</i> | miR-1231        | 1 |
| <i>circADGRB3</i> | miR-1236-5p     | 1 |
| <i>circADGRB3</i> | miR-1245b-3p    | 1 |
| <i>circADGRB3</i> | miR-1245b-5p    | 1 |
| <i>circADGRB3</i> | miR-1250-3p     | 1 |
| <i>circADGRB3</i> | miR-1260a/1260b | 1 |
| <i>circADGRB3</i> | miR-1261        | 1 |
| <i>circADGRB3</i> | miR-1267        | 1 |

|                   |                                     |   |
|-------------------|-------------------------------------|---|
| <i>circADGRB3</i> | miR-1286                            | 1 |
| <i>circADGRB3</i> | miR-1288-3p                         | 1 |
| <i>circADGRB3</i> | miR-1289                            | 1 |
| <i>circADGRB3</i> | miR-129-5p                          | 2 |
| <i>circADGRB3</i> | miR-1296-3p                         | 1 |
| <i>circADGRB3</i> | miR-135a-3p                         | 1 |
| <i>circADGRB3</i> | miR-144-3p                          | 1 |
| <i>circADGRB3</i> | miR-145-5p                          | 1 |
| <i>circADGRB3</i> | miR-1468-3p                         | 1 |
| <i>circADGRB3</i> | miR-16-1-3p                         | 1 |
| <i>circADGRB3</i> | miR-17-5p/20-5p/93-5p/106-5p/519-3p | 1 |
| <i>circADGRB3</i> | miR-183-3p                          | 1 |
| <i>circADGRB3</i> | miR-188-3p                          | 1 |
| <i>circADGRB3</i> | miR-19-5p                           | 2 |
| <i>circADGRB3</i> | miR-191-3p                          | 1 |
| <i>circADGRB3</i> | miR-1972                            | 1 |
| <i>circADGRB3</i> | miR-200-3p/429                      | 1 |
| <i>circADGRB3</i> | miR-204-5p/211-5p                   | 1 |
| <i>circADGRB3</i> | miR-2052                            | 2 |
| <i>circADGRB3</i> | miR-219b-5p                         | 1 |
| <i>circADGRB3</i> | miR-2355-5p                         | 1 |
| <i>circADGRB3</i> | miR-2467-5p                         | 1 |
| <i>circADGRB3</i> | miR-29a-5p                          | 1 |
| <i>circADGRB3</i> | miR-3065-5p                         | 1 |
| <i>circADGRB3</i> | miR-3117-3p                         | 1 |
| <i>circADGRB3</i> | miR-3140-3p                         | 1 |
| <i>circADGRB3</i> | miR-3154                            | 1 |
| <i>circADGRB3</i> | miR-3156-3p                         | 1 |
| <i>circADGRB3</i> | miR-3162-5p                         | 1 |
| <i>circADGRB3</i> | miR-3163                            | 1 |
| <i>circADGRB3</i> | miR-3180-5p                         | 1 |
| <i>circADGRB3</i> | miR-3182                            | 2 |
| <i>circADGRB3</i> | miR-3188                            | 1 |
| <i>circADGRB3</i> | miR-3198/4309                       | 1 |
| <i>circADGRB3</i> | miR-323b-5p/410-5p/494-5p           | 1 |
| <i>circADGRB3</i> | miR-338-5p                          | 2 |
| <i>circADGRB3</i> | miR-340-5p                          | 1 |
| <i>circADGRB3</i> | miR-3610                            | 1 |

|                   |                           |   |
|-------------------|---------------------------|---|
| <i>circADGRB3</i> | miR-3662                  | 1 |
| <i>circADGRB3</i> | miR-367-5p                | 1 |
| <i>circADGRB3</i> | miR-3682-3p               | 2 |
| <i>circADGRB3</i> | miR-3690                  | 1 |
| <i>circADGRB3</i> | miR-371-5p                | 1 |
| <i>circADGRB3</i> | miR-371b-5p/373-5p/616-5p | 1 |
| <i>circADGRB3</i> | miR-372-5p                | 1 |
| <i>circADGRB3</i> | miR-374-5p                | 1 |
| <i>circADGRB3</i> | miR-376b-5p/376c-5p       | 1 |
| <i>circADGRB3</i> | miR-378j/6839-5p          | 1 |
| <i>circADGRB3</i> | miR-382-5p                | 1 |
| <i>circADGRB3</i> | miR-3925-3p               | 1 |
| <i>circADGRB3</i> | miR-3927-5p               | 1 |
| <i>circADGRB3</i> | miR-3928-5p/6806-3p       | 1 |
| <i>circADGRB3</i> | miR-3929/4419b/4478       | 1 |
| <i>circADGRB3</i> | miR-3938                  | 1 |
| <i>circADGRB3</i> | miR-3940-5p/4507          | 1 |
| <i>circADGRB3</i> | miR-3973                  | 2 |
| <i>circADGRB3</i> | miR-3975                  | 1 |
| <i>circADGRB3</i> | miR-3978                  | 1 |
| <i>circADGRB3</i> | miR-425-5p                | 1 |
| <i>circADGRB3</i> | miR-4254                  | 1 |
| <i>circADGRB3</i> | miR-4272                  | 1 |
| <i>circADGRB3</i> | miR-4282                  | 1 |
| <i>circADGRB3</i> | miR-4292/6791-5p          | 1 |
| <i>circADGRB3</i> | miR-4294                  | 1 |
| <i>circADGRB3</i> | miR-4303                  | 1 |
| <i>circADGRB3</i> | miR-4308                  | 1 |
| <i>circADGRB3</i> | miR-4320                  | 1 |
| <i>circADGRB3</i> | miR-4417                  | 1 |
| <i>circADGRB3</i> | miR-4427                  | 1 |
| <i>circADGRB3</i> | miR-4452                  | 1 |
| <i>circADGRB3</i> | miR-4476/6876-5p          | 1 |
| <i>circADGRB3</i> | miR-4480                  | 1 |
| <i>circADGRB3</i> | miR-4482-3p               | 1 |
| <i>circADGRB3</i> | miR-4511                  | 2 |
| <i>circADGRB3</i> | miR-4515                  | 1 |
| <i>circADGRB3</i> | miR-452-3p                | 2 |

|                   |                     |   |
|-------------------|---------------------|---|
| <i>circADGRB3</i> | miR-4639-5p         | 1 |
| <i>circADGRB3</i> | miR-4645-3p         | 1 |
| <i>circADGRB3</i> | miR-4650-5p         | 1 |
| <i>circADGRB3</i> | miR-4661-5p         | 1 |
| <i>circADGRB3</i> | miR-4662-5p         | 2 |
| <i>circADGRB3</i> | miR-4668-3p         | 1 |
| <i>circADGRB3</i> | miR-4680-3p         | 1 |
| <i>circADGRB3</i> | miR-4698            | 1 |
| <i>circADGRB3</i> | miR-4704-3p         | 2 |
| <i>circADGRB3</i> | miR-4705            | 1 |
| <i>circADGRB3</i> | miR-4722-5p         | 1 |
| <i>circADGRB3</i> | miR-4733-5p         | 1 |
| <i>circADGRB3</i> | miR-4735-5p         | 1 |
| <i>circADGRB3</i> | miR-4740-5p         | 1 |
| <i>circADGRB3</i> | miR-4755-5p/5006-3p | 1 |
| <i>circADGRB3</i> | miR-4760-5p/8061    | 1 |
| <i>circADGRB3</i> | miR-4762-3p         | 3 |
| <i>circADGRB3</i> | miR-4764-3p         | 1 |
| <i>circADGRB3</i> | miR-4765            | 1 |
| <i>circADGRB3</i> | miR-4766-5p         | 1 |
| <i>circADGRB3</i> | miR-4773            | 2 |
| <i>circADGRB3</i> | miR-4775            | 1 |
| <i>circADGRB3</i> | miR-4777-5p         | 1 |
| <i>circADGRB3</i> | miR-4778-5p         | 1 |
| <i>circADGRB3</i> | miR-485-5p          | 1 |
| <i>circADGRB3</i> | miR-488-3p          | 1 |
| <i>circADGRB3</i> | miR-493-3p          | 2 |
| <i>circADGRB3</i> | miR-495-3p          | 1 |
| <i>circADGRB3</i> | miR-495-5p          | 1 |
| <i>circADGRB3</i> | miR-4999-3p         | 1 |
| <i>circADGRB3</i> | miR-5002-3p         | 1 |
| <i>circADGRB3</i> | miR-502-5p          | 1 |
| <i>circADGRB3</i> | miR-505-3p.1        | 1 |
| <i>circADGRB3</i> | miR-5088-3p         | 1 |
| <i>circADGRB3</i> | miR-513c-5p/514b-5p | 2 |
| <i>circADGRB3</i> | miR-515-5p/519e-5p  | 1 |
| <i>circADGRB3</i> | miR-5187-3p         | 1 |
| <i>circADGRB3</i> | miR-518d-5p/519-5p  | 1 |



|                   |                                                                  |   |
|-------------------|------------------------------------------------------------------|---|
| <i>circADGRB3</i> | miR-520g-3p                                                      | 2 |
| <i>circADGRB3</i> | miR-525-5p                                                       | 1 |
| <i>circADGRB3</i> | miR-541-5p                                                       | 1 |
| <i>circADGRB3</i> | miR-548ah-5p/3609                                                | 1 |
| <i>circADGRB3</i> | miR-548aj-5p/548f-5p/548g-5p/548x-5p                             | 1 |
| <i>circADGRB3</i> | miR-548at-5p                                                     | 1 |
| <i>circADGRB3</i> | miR-548av-5p/548k/8054                                           | 1 |
| <i>circADGRB3</i> | miR-548ay-5p/548au-5p/548as-5p/548ar-5p/548aq-5p/548ap-5p/548am- |   |
| <i>circADGRB3</i> | miR-548b-3p                                                      | 2 |
| <i>circADGRB3</i> | miR-548l                                                         | 1 |
| <i>circADGRB3</i> | miR-556-5p                                                       | 1 |
| <i>circADGRB3</i> | miR-5571-5p                                                      | 2 |
| <i>circADGRB3</i> | miR-5585-3p                                                      | 1 |
| <i>circADGRB3</i> | miR-561-3p                                                       | 1 |
| <i>circADGRB3</i> | miR-568                                                          | 2 |
| <i>circADGRB3</i> | miR-5684                                                         | 1 |
| <i>circADGRB3</i> | miR-5687                                                         | 1 |
| <i>circADGRB3</i> | miR-5701                                                         | 1 |
| <i>circADGRB3</i> | miR-5702                                                         | 1 |
| <i>circADGRB3</i> | miR-604                                                          | 1 |
| <i>circADGRB3</i> | miR-607                                                          | 3 |
| <i>circADGRB3</i> | miR-610                                                          | 1 |
| <i>circADGRB3</i> | miR-616-3p                                                       | 1 |
| <i>circADGRB3</i> | miR-618                                                          | 1 |
| <i>circADGRB3</i> | miR-623                                                          | 1 |
| <i>circADGRB3</i> | miR-624-5p                                                       | 1 |
| <i>circADGRB3</i> | miR-632/4288                                                     | 1 |
| <i>circADGRB3</i> | miR-6505-5p                                                      | 2 |
| <i>circADGRB3</i> | miR-6507-3p                                                      | 1 |
| <i>circADGRB3</i> | miR-6508-5p/8067                                                 | 1 |
| <i>circADGRB3</i> | miR-6511-5p                                                      | 1 |
| <i>circADGRB3</i> | miR-654-3p                                                       | 1 |
| <i>circADGRB3</i> | miR-656-5p                                                       | 1 |
| <i>circADGRB3</i> | miR-664a-3p                                                      | 3 |
| <i>circADGRB3</i> | miR-671-5p                                                       | 1 |
| <i>circADGRB3</i> | miR-6729-3p                                                      | 2 |
| <i>circADGRB3</i> | miR-6757-5p                                                      | 1 |
| <i>circADGRB3</i> | miR-676-5p                                                       | 2 |

|                   |                          |   |
|-------------------|--------------------------|---|
| <i>circADGRB3</i> | miR-6762-3p              | 1 |
| <i>circADGRB3</i> | miR-6808-3p              | 1 |
| <i>circADGRB3</i> | miR-6826-5p              | 1 |
| <i>circADGRB3</i> | miR-6828-5p              | 1 |
| <i>circADGRB3</i> | miR-6839-3p              | 1 |
| <i>circADGRB3</i> | miR-7159-3p              | 1 |
| <i>circADGRB3</i> | miR-7161-3p              | 1 |
| <i>circADGRB3</i> | miR-758-3p               | 1 |
| <i>circADGRB3</i> | miR-766-3p               | 1 |
| <i>circADGRB3</i> | miR-7848-3p              | 1 |
| <i>circADGRB3</i> | miR-7850-5p              | 3 |
| <i>circADGRB3</i> | miR-8063                 | 1 |
| <i>circADGRB3</i> | miR-8066                 | 1 |
| <i>circADGRB3</i> | miR-8084                 | 1 |
| <i>circADGRB3</i> | miR-8086                 | 1 |
| <i>circADGRB3</i> | miR-873-5p.1             | 1 |
| <i>circADGRB3</i> | miR-873-5p.2             | 1 |
| <i>circADGRB3</i> | miR-885-5p               | 2 |
| <i>circADGRB3</i> | miR-1179                 | 1 |
| <i>circADGRB3</i> | miR-1185-5p              | 2 |
| <i>circADGRB3</i> | miR-1202/3972            | 1 |
| <i>circADGRB3</i> | miR-1225-3p              | 1 |
| <i>circADGRB3</i> | miR-1246                 | 1 |
| <i>circADGRB3</i> | miR-1251-5p              | 1 |
| <i>circADGRB3</i> | miR-1255a/1255b-5p       | 1 |
| <i>circADGRB3</i> | miR-126-5p               | 1 |
| <i>circADGRB3</i> | miR-1262/4701-3p/6736-5p | 1 |
| <i>circADGRB3</i> | miR-1273f                | 1 |
| <i>circADGRB3</i> | miR-128-3p               | 1 |
| <i>circADGRB3</i> | miR-1293/4483            | 1 |
| <i>circADGRB3</i> | miR-143-3p               | 1 |
| <i>circADGRB3</i> | miR-153-3p               | 1 |
| <i>circADGRB3</i> | miR-155-5p               | 1 |
| <i>circADGRB3</i> | miR-188-5p               | 1 |
| <i>circADGRB3</i> | miR-1910-3p/6511a-5p     | 1 |
| <i>circADGRB3</i> | miR-196-5p               | 1 |
| <i>circADGRB3</i> | miR-2392                 | 1 |
| <i>circADGRB3</i> | miR-24-5p                | 1 |

|                   |                       |   |
|-------------------|-----------------------|---|
| <i>circADGRB3</i> | miR-2681-5p           | 1 |
| <i>circADGRB3</i> | miR-2909              | 1 |
| <i>circADGRB3</i> | miR-298               | 1 |
| <i>circADGRB3</i> | miR-3115              | 1 |
| <i>circADGRB3</i> | miR-3125/3916/6859-5p | 1 |
| <i>circADGRB3</i> | miR-3138              | 1 |
| <i>circADGRB3</i> | miR-3145-3p           | 1 |
| <i>circADGRB3</i> | miR-3159              | 1 |
| <i>circADGRB3</i> | miR-3165              | 1 |
| <i>circADGRB3</i> | miR-3201/4791         | 1 |
| <i>circADGRB3</i> | miR-34b-5p/449c-5p    | 1 |
| <i>circADGRB3</i> | miR-3605-5p           | 2 |
| <i>circADGRB3</i> | miR-363-5p/6745       | 1 |
| <i>circADGRB3</i> | miR-3667-5p           | 1 |
| <i>circADGRB3</i> | miR-3675-3p           | 1 |
| <i>circADGRB3</i> | miR-379-5p            | 1 |
| <i>circADGRB3</i> | miR-3924              | 1 |
| <i>circADGRB3</i> | miR-3926              | 1 |
| <i>circADGRB3</i> | miR-3927-3p/6831-5p   | 1 |
| <i>circADGRB3</i> | miR-411-3p            | 1 |
| <i>circADGRB3</i> | miR-4269/6715b-5p     | 2 |
| <i>circADGRB3</i> | miR-432-3p            | 1 |
| <i>circADGRB3</i> | miR-4330              | 1 |
| <i>circADGRB3</i> | miR-4438              | 1 |
| <i>circADGRB3</i> | miR-4451              | 1 |
| <i>circADGRB3</i> | miR-448               | 1 |
| <i>circADGRB3</i> | miR-449c-3p           | 1 |
| <i>circADGRB3</i> | miR-450b-3p/769-3p    | 1 |
| <i>circADGRB3</i> | miR-4514/4692         | 2 |
| <i>circADGRB3</i> | miR-4524b-3p          | 1 |
| <i>circADGRB3</i> | miR-4535              | 1 |
| <i>circADGRB3</i> | miR-4650-3p           | 1 |
| <i>circADGRB3</i> | miR-4670-3p           | 1 |
| <i>circADGRB3</i> | miR-4684-5p           | 1 |
| <i>circADGRB3</i> | miR-4694-3p           | 1 |
| <i>circADGRB3</i> | miR-4696              | 1 |
| <i>circADGRB3</i> | miR-4708-5p           | 1 |
| <i>circADGRB3</i> | miR-4711-3p           | 1 |

|                   |                              |   |
|-------------------|------------------------------|---|
| <i>circADGRB3</i> | miR-4712-3p                  | 1 |
| <i>circADGRB3</i> | miR-4717-5p                  | 1 |
| <i>circADGRB3</i> | miR-4724-5p                  | 1 |
| <i>circADGRB3</i> | miR-4728-3p                  | 1 |
| <i>circADGRB3</i> | miR-4732-5p                  | 1 |
| <i>circADGRB3</i> | miR-4742-5p                  | 2 |
| <i>circADGRB3</i> | miR-4753-5p                  | 1 |
| <i>circADGRB3</i> | miR-4776-5p                  | 1 |
| <i>circADGRB3</i> | miR-4777-3p                  | 1 |
| <i>circADGRB3</i> | miR-4795-3p                  | 2 |
| <i>circADGRB3</i> | miR-4798-5p                  | 1 |
| <i>circADGRB3</i> | miR-4800-5p                  | 1 |
| <i>circADGRB3</i> | miR-496.2                    | 1 |
| <i>circADGRB3</i> | miR-5004-3p                  | 1 |
| <i>circADGRB3</i> | miR-5006-5p                  | 1 |
| <i>circADGRB3</i> | miR-5089-5p                  | 1 |
| <i>circADGRB3</i> | miR-517-5p                   | 1 |
| <i>circADGRB3</i> | miR-5187-5p                  | 1 |
| <i>circADGRB3</i> | miR-5197-5p                  | 1 |
| <i>circADGRB3</i> | miR-522-3p                   | 1 |
| <i>circADGRB3</i> | miR-548ai/548ag/548ba/570-5p | 1 |
| <i>circADGRB3</i> | miR-548ao-3p                 | 1 |
| <i>circADGRB3</i> | miR-548u/7161-5p             | 1 |
| <i>circADGRB3</i> | miR-549a                     | 1 |
| <i>circADGRB3</i> | miR-555                      | 2 |
| <i>circADGRB3</i> | miR-561-5p                   | 1 |
| <i>circADGRB3</i> | miR-567                      | 1 |
| <i>circADGRB3</i> | miR-569                      | 1 |
| <i>circADGRB3</i> | miR-586                      | 1 |
| <i>circADGRB3</i> | miR-6126                     | 1 |
| <i>circADGRB3</i> | miR-6501-3p                  | 1 |
| <i>circADGRB3</i> | miR-6502-3p                  | 1 |
| <i>circADGRB3</i> | miR-652-3p                   | 1 |
| <i>circADGRB3</i> | miR-665                      | 1 |
| <i>circADGRB3</i> | miR-670-5p                   | 1 |
| <i>circADGRB3</i> | miR-6728-5p                  | 1 |
| <i>circADGRB3</i> | miR-6741-5p                  | 1 |
| <i>circADGRB3</i> | miR-6742-3p                  | 1 |

|                   |                         |   |
|-------------------|-------------------------|---|
| <i>circADGRB3</i> | miR-6744-5p             | 1 |
| <i>circADGRB3</i> | miR-6755-5p             | 2 |
| <i>circADGRB3</i> | miR-6756-5p/6766-5p     | 1 |
| <i>circADGRB3</i> | miR-6758-5p/6856-5p     | 1 |
| <i>circADGRB3</i> | miR-6776-5p             | 1 |
| <i>circADGRB3</i> | miR-6792-5p             | 2 |
| <i>circADGRB3</i> | miR-6807-5p             | 1 |
| <i>circADGRB3</i> | miR-6832-5p             | 1 |
| <i>circADGRB3</i> | miR-6841-5p             | 2 |
| <i>circADGRB3</i> | miR-6852-5p             | 1 |
| <i>circADGRB3</i> | miR-6861-5p             | 1 |
| <i>circADGRB3</i> | miR-6864-5p             | 1 |
| <i>circADGRB3</i> | miR-6871-5p             | 1 |
| <i>circADGRB3</i> | miR-6873-3p             | 1 |
| <i>circADGRB3</i> | miR-6880-5p             | 1 |
| <i>circADGRB3</i> | miR-6888-3p             | 2 |
| <i>circADGRB3</i> | miR-8071                | 1 |
| <i>circADGRB3</i> | miR-875-5p              | 1 |
| <i>circADGRB3</i> | miR-924                 | 1 |
| <i>circADGRB3</i> | miR-939-3p              | 1 |
| <i>circADGRB3</i> | miR-940/6808-5p/6893-5p | 1 |
| <i>circADGRB3</i> | miR-106a-3p             | 2 |
| <i>circADGRB3</i> | miR-1206                | 1 |
| <i>circADGRB3</i> | miR-1264                | 1 |
| <i>circADGRB3</i> | miR-1265                | 1 |
| <i>circADGRB3</i> | miR-1269                | 1 |
| <i>circADGRB3</i> | miR-1277-5p             | 1 |
| <i>circADGRB3</i> | miR-1279                | 2 |
| <i>circADGRB3</i> | miR-1287-5p             | 1 |
| <i>circADGRB3</i> | miR-129-3p              | 1 |
| <i>circADGRB3</i> | miR-1298-5p             | 2 |
| <i>circADGRB3</i> | miR-1301-5p/6502-5p     | 1 |
| <i>circADGRB3</i> | miR-1303                | 1 |
| <i>circADGRB3</i> | miR-1304-5p             | 1 |
| <i>circADGRB3</i> | miR-1305                | 2 |
| <i>circADGRB3</i> | miR-1307-3p             | 1 |
| <i>circADGRB3</i> | miR-1324                | 1 |
| <i>circADGRB3</i> | miR-133a-3p.1           | 1 |

|                   |                   |   |
|-------------------|-------------------|---|
| <i>circADGRB3</i> | miR-133a-5p       | 1 |
| <i>circADGRB3</i> | miR-134-3p        | 1 |
| <i>circADGRB3</i> | miR-1343-3p       | 1 |
| <i>circADGRB3</i> | miR-138-2-3p      | 1 |
| <i>circADGRB3</i> | miR-138-5p        | 1 |
| <i>circADGRB3</i> | miR-142-3p.1      | 1 |
| <i>circADGRB3</i> | miR-144-5p        | 1 |
| <i>circADGRB3</i> | miR-147b          | 1 |
| <i>circADGRB3</i> | miR-153-5p        | 2 |
| <i>circADGRB3</i> | miR-1537-3p       | 1 |
| <i>circADGRB3</i> | miR-15a-3p        | 1 |
| <i>circADGRB3</i> | miR-15b-3p        | 1 |
| <i>circADGRB3</i> | miR-182-5p        | 1 |
| <i>circADGRB3</i> | miR-183-5p.2      | 1 |
| <i>circADGRB3</i> | miR-186-5p        | 1 |
| <i>circADGRB3</i> | miR-19-3p         | 2 |
| <i>circADGRB3</i> | miR-1911-3p       | 1 |
| <i>circADGRB3</i> | miR-1914-5p       | 1 |
| <i>circADGRB3</i> | miR-1915-5p       | 1 |
| <i>circADGRB3</i> | miR-192-3p        | 1 |
| <i>circADGRB3</i> | miR-193b-5p       | 2 |
| <i>circADGRB3</i> | miR-194-3p        | 1 |
| <i>circADGRB3</i> | miR-196a-3p       | 1 |
| <i>circADGRB3</i> | miR-202-3p        | 1 |
| <i>circADGRB3</i> | miR-203a-3p.1     | 1 |
| <i>circADGRB3</i> | miR-203b-3p       | 1 |
| <i>circADGRB3</i> | miR-21-3p/3591-3p | 1 |
| <i>circADGRB3</i> | miR-21-5p/590-5p  | 1 |
| <i>circADGRB3</i> | miR-210-3p        | 1 |
| <i>circADGRB3</i> | miR-210-5p        | 1 |
| <i>circADGRB3</i> | miR-211-3p        | 2 |
| <i>circADGRB3</i> | miR-2117          | 1 |
| <i>circADGRB3</i> | miR-215-3p        | 2 |
| <i>circADGRB3</i> | miR-28-5p/708-5p  | 1 |
| <i>circADGRB3</i> | miR-299-5p        | 1 |
| <i>circADGRB3</i> | miR-29b-1-5p      | 3 |
| <i>circADGRB3</i> | miR-31-3p         | 1 |
| <i>circADGRB3</i> | miR-31-5p         | 2 |

|                   |                           |   |
|-------------------|---------------------------|---|
| <i>circADGRB3</i> | miR-3120-3p               | 1 |
| <i>circADGRB3</i> | miR-3123                  | 1 |
| <i>circADGRB3</i> | miR-3133                  | 1 |
| <i>circADGRB3</i> | miR-3134                  | 1 |
| <i>circADGRB3</i> | miR-3135b                 | 1 |
| <i>circADGRB3</i> | miR-3140-5p               | 1 |
| <i>circADGRB3</i> | miR-3150a-5p/3150b-5p     | 1 |
| <i>circADGRB3</i> | miR-3151-3p               | 1 |
| <i>circADGRB3</i> | miR-3157-5p               | 1 |
| <i>circADGRB3</i> | miR-3166                  | 1 |
| <i>circADGRB3</i> | miR-3170/6855-5p          | 1 |
| <i>circADGRB3</i> | miR-3179                  | 1 |
| <i>circADGRB3</i> | miR-3183/4723-3p/6769b-3p | 2 |
| <i>circADGRB3</i> | miR-3184-3p               | 1 |
| <i>circADGRB3</i> | miR-3185                  | 3 |
| <i>circADGRB3</i> | miR-3187-3p               | 1 |
| <i>circADGRB3</i> | miR-3193                  | 1 |
| <i>circADGRB3</i> | miR-320                   | 1 |
| <i>circADGRB3</i> | miR-320e                  | 1 |
| <i>circADGRB3</i> | miR-323a-5p               | 1 |
| <i>circADGRB3</i> | miR-323b-3p               | 2 |
| <i>circADGRB3</i> | miR-324-5p                | 1 |
| <i>circADGRB3</i> | miR-329-5p                | 1 |
| <i>circADGRB3</i> | miR-330-3p                | 3 |
| <i>circADGRB3</i> | miR-33a-3p                | 1 |
| <i>circADGRB3</i> | miR-342-5p/4664-5p        | 1 |
| <i>circADGRB3</i> | miR-345-3p                | 1 |
| <i>circADGRB3</i> | miR-3613-3p               | 1 |
| <i>circADGRB3</i> | miR-3614-3p               | 2 |
| <i>circADGRB3</i> | miR-3614-5p               | 1 |
| <i>circADGRB3</i> | miR-3618                  | 1 |
| <i>circADGRB3</i> | miR-362-5p/500b-5p        | 2 |
| <i>circADGRB3</i> | miR-3622b-5p              | 1 |
| <i>circADGRB3</i> | miR-3651                  | 1 |
| <i>circADGRB3</i> | miR-3652/4430             | 1 |
| <i>circADGRB3</i> | miR-3663-5p               | 1 |
| <i>circADGRB3</i> | miR-3670                  | 1 |
| <i>circADGRB3</i> | miR-3671                  | 1 |

|                   |                    |   |
|-------------------|--------------------|---|
| <i>circADGRB3</i> | miR-3674           | 1 |
| <i>circADGRB3</i> | miR-3678-5p        | 1 |
| <i>circADGRB3</i> | miR-3681-5p        | 1 |
| <i>circADGRB3</i> | miR-374c-3p        | 1 |
| <i>circADGRB3</i> | miR-375            | 1 |
| <i>circADGRB3</i> | miR-377-5p/6086    | 1 |
| <i>circADGRB3</i> | miR-381-5p         | 1 |
| <i>circADGRB3</i> | miR-382-3p         | 2 |
| <i>circADGRB3</i> | miR-3913-3p        | 1 |
| <i>circADGRB3</i> | miR-3925-5p        | 1 |
| <i>circADGRB3</i> | miR-3936           | 1 |
| <i>circADGRB3</i> | miR-3943           | 1 |
| <i>circADGRB3</i> | miR-409-3p         | 2 |
| <i>circADGRB3</i> | miR-423-3p         | 1 |
| <i>circADGRB3</i> | miR-4261           | 1 |
| <i>circADGRB3</i> | miR-4265/4296/4322 | 1 |
| <i>circADGRB3</i> | miR-4277           | 1 |
| <i>circADGRB3</i> | miR-4304           | 1 |
| <i>circADGRB3</i> | miR-4312           | 1 |
| <i>circADGRB3</i> | miR-4314           | 1 |
| <i>circADGRB3</i> | miR-4323           | 1 |
| <i>circADGRB3</i> | miR-4433a-3p       | 1 |
| <i>circADGRB3</i> | miR-4435           | 1 |
| <i>circADGRB3</i> | miR-4450           | 1 |
| <i>circADGRB3</i> | miR-4459           | 1 |
| <i>circADGRB3</i> | miR-4464/4748      | 1 |
| <i>circADGRB3</i> | miR-4473           | 1 |
| <i>circADGRB3</i> | miR-4474-3p        | 1 |
| <i>circADGRB3</i> | miR-4493           | 1 |
| <i>circADGRB3</i> | miR-4496           | 1 |
| <i>circADGRB3</i> | miR-4505/5787      | 1 |
| <i>circADGRB3</i> | miR-4509           | 1 |
| <i>circADGRB3</i> | miR-4517           | 1 |
| <i>circADGRB3</i> | miR-4528           | 1 |
| <i>circADGRB3</i> | miR-4529-5p        | 1 |
| <i>circADGRB3</i> | miR-4534/8082      | 1 |
| <i>circADGRB3</i> | miR-4539           | 1 |
| <i>circADGRB3</i> | miR-4540           | 1 |



|                   |                                  |   |
|-------------------|----------------------------------|---|
| <i>circADGRB3</i> | miR-4633-3p/6500-5p              | 1 |
| <i>circADGRB3</i> | miR-4638-5p                      | 1 |
| <i>circADGRB3</i> | miR-4645-5p/4673                 | 1 |
| <i>circADGRB3</i> | miR-4667-5p/4700-5p/8089         | 1 |
| <i>circADGRB3</i> | miR-4671-3p                      | 1 |
| <i>circADGRB3</i> | miR-4671-5p                      | 1 |
| <i>circADGRB3</i> | miR-4686                         | 1 |
| <i>circADGRB3</i> | miR-4687-5p                      | 1 |
| <i>circADGRB3</i> | miR-4688/6743-5p                 | 1 |
| <i>circADGRB3</i> | miR-4690-3p/5685                 | 1 |
| <i>circADGRB3</i> | miR-4699-3p                      | 1 |
| <i>circADGRB3</i> | miR-4708-3p                      | 2 |
| <i>circADGRB3</i> | miR-4709-3p                      | 1 |
| <i>circADGRB3</i> | miR-4713-3p                      | 1 |
| <i>circADGRB3</i> | miR-4716-3p/6794-5p              | 1 |
| <i>circADGRB3</i> | miR-4716-5p                      | 1 |
| <i>circADGRB3</i> | miR-4723-5p/5698/6870-5p/7111-5p | 1 |
| <i>circADGRB3</i> | miR-4729                         | 1 |
| <i>circADGRB3</i> | miR-4730                         | 1 |
| <i>circADGRB3</i> | miR-4737                         | 2 |
| <i>circADGRB3</i> | miR-4738-3p                      | 1 |
| <i>circADGRB3</i> | miR-4744                         | 1 |
| <i>circADGRB3</i> | miR-4746-3p                      | 1 |
| <i>circADGRB3</i> | miR-4749-3p                      | 1 |
| <i>circADGRB3</i> | miR-4760-3p                      | 2 |
| <i>circADGRB3</i> | miR-4761-5p                      | 1 |
| <i>circADGRB3</i> | miR-4768-3p                      | 1 |
| <i>circADGRB3</i> | miR-4771                         | 1 |
| <i>circADGRB3</i> | miR-4781-3p                      | 2 |
| <i>circADGRB3</i> | miR-4793-5p                      | 2 |
| <i>circADGRB3</i> | miR-4799-5p                      | 2 |
| <i>circADGRB3</i> | miR-4800-3p                      | 1 |
| <i>circADGRB3</i> | miR-4802-3p                      | 1 |
| <i>circADGRB3</i> | miR-4802-5p                      | 1 |
| <i>circADGRB3</i> | miR-486-3p                       | 1 |
| <i>circADGRB3</i> | miR-487a-5p/487b-5p              | 1 |
| <i>circADGRB3</i> | miR-489-3p                       | 1 |
| <i>circADGRB3</i> | miR-490-3p                       | 1 |

|                   |                             |   |
|-------------------|-----------------------------|---|
| <i>circADGRB3</i> | miR-490-5p                  | 1 |
| <i>circADGRB3</i> | miR-494-3p                  | 1 |
| <i>circADGRB3</i> | miR-5000-5p                 | 1 |
| <i>circADGRB3</i> | miR-5007-3p                 | 2 |
| <i>circADGRB3</i> | miR-5008-3p/6737-3p/7157-3p | 1 |
| <i>circADGRB3</i> | miR-5008-5p                 | 1 |
| <i>circADGRB3</i> | miR-5009-5p/8058            | 1 |
| <i>circADGRB3</i> | miR-500a-5p                 | 1 |
| <i>circADGRB3</i> | miR-501-5p                  | 2 |
| <i>circADGRB3</i> | miR-5010-5p                 | 1 |
| <i>circADGRB3</i> | miR-5087                    | 1 |
| <i>circADGRB3</i> | miR-5092                    | 1 |
| <i>circADGRB3</i> | miR-5093                    | 1 |
| <i>circADGRB3</i> | miR-5095/7151-3p            | 1 |
| <i>circADGRB3</i> | miR-5096                    | 1 |
| <i>circADGRB3</i> | miR-510-3p                  | 2 |
| <i>circADGRB3</i> | miR-512-5p                  | 1 |
| <i>circADGRB3</i> | miR-513b-3p                 | 1 |
| <i>circADGRB3</i> | miR-513b-5p                 | 1 |
| <i>circADGRB3</i> | miR-5196-3p                 | 2 |
| <i>circADGRB3</i> | miR-520f-5p                 | 2 |
| <i>circADGRB3</i> | miR-526b-5p                 | 2 |
| <i>circADGRB3</i> | miR-539-3p                  | 1 |
| <i>circADGRB3</i> | miR-539-5p                  | 1 |
| <i>circADGRB3</i> | miR-548az-5p/548t-5p        | 1 |
| <i>circADGRB3</i> | miR-548g-3p                 | 1 |
| <i>circADGRB3</i> | miR-548n                    | 1 |
| <i>circADGRB3</i> | miR-548p                    | 1 |
| <i>circADGRB3</i> | miR-548s                    | 1 |
| <i>circADGRB3</i> | miR-5571-3p                 | 1 |
| <i>circADGRB3</i> | miR-5579-3p                 | 1 |
| <i>circADGRB3</i> | miR-5583-3p                 | 1 |
| <i>circADGRB3</i> | miR-5586-5p                 | 1 |
| <i>circADGRB3</i> | miR-5589-3p                 | 1 |
| <i>circADGRB3</i> | miR-5680                    | 1 |
| <i>circADGRB3</i> | miR-5691                    | 1 |
| <i>circADGRB3</i> | miR-5693                    | 1 |
| <i>circADGRB3</i> | miR-5696                    | 2 |

|                   |                  |   |
|-------------------|------------------|---|
| <i>circADGRB3</i> | miR-5700         | 2 |
| <i>circADGRB3</i> | miR-5708         | 1 |
| <i>circADGRB3</i> | miR-575/4676-5p  | 1 |
| <i>circADGRB3</i> | miR-576-3p       | 1 |
| <i>circADGRB3</i> | miR-579-3p       | 2 |
| <i>circADGRB3</i> | miR-582-3p       | 1 |
| <i>circADGRB3</i> | miR-588          | 1 |
| <i>circADGRB3</i> | miR-589-3p       | 2 |
| <i>circADGRB3</i> | miR-595          | 1 |
| <i>circADGRB3</i> | miR-598-3p       | 1 |
| <i>circADGRB3</i> | miR-605-3p       | 1 |
| <i>circADGRB3</i> | miR-605-5p       | 1 |
| <i>circADGRB3</i> | miR-606          | 1 |
| <i>circADGRB3</i> | miR-6073         | 1 |
| <i>circADGRB3</i> | miR-6074         | 1 |
| <i>circADGRB3</i> | miR-608/4651     | 1 |
| <i>circADGRB3</i> | miR-6085/6813-5p | 1 |
| <i>circADGRB3</i> | miR-6089         | 1 |
| <i>circADGRB3</i> | miR-6131         | 1 |
| <i>circADGRB3</i> | miR-625-3p       | 1 |
| <i>circADGRB3</i> | miR-625-5p       | 1 |
| <i>circADGRB3</i> | miR-627-3p       | 2 |
| <i>circADGRB3</i> | miR-629-3p       | 1 |
| <i>circADGRB3</i> | miR-629-5p       | 2 |
| <i>circADGRB3</i> | miR-637          | 1 |
| <i>circADGRB3</i> | miR-638          | 1 |
| <i>circADGRB3</i> | miR-640          | 1 |
| <i>circADGRB3</i> | miR-642b-5p      | 1 |
| <i>circADGRB3</i> | miR-649          | 1 |
| <i>circADGRB3</i> | miR-6500-3p      | 1 |
| <i>circADGRB3</i> | miR-6503-3p      | 1 |
| <i>circADGRB3</i> | miR-6507-5p      | 2 |
| <i>circADGRB3</i> | miR-651-5p       | 1 |
| <i>circADGRB3</i> | miR-6514-5p      | 1 |
| <i>circADGRB3</i> | miR-653-5p       | 2 |
| <i>circADGRB3</i> | miR-655-5p       | 1 |
| <i>circADGRB3</i> | miR-668-3p       | 1 |
| <i>circADGRB3</i> | miR-6715b-3p     | 3 |

|                   |                             |   |
|-------------------|-----------------------------|---|
| <i>circADGRB3</i> | miR-6723-5p                 | 1 |
| <i>circADGRB3</i> | miR-6732-5p                 | 1 |
| <i>circADGRB3</i> | miR-6737-5p/6812-5p/6819-5p | 1 |
| <i>circADGRB3</i> | miR-6747-5p                 | 1 |
| <i>circADGRB3</i> | miR-6748-5p                 | 1 |
| <i>circADGRB3</i> | miR-675-5p/4466             | 1 |
| <i>circADGRB3</i> | miR-6750-3p                 | 2 |
| <i>circADGRB3</i> | miR-6759-5p                 | 1 |
| <i>circADGRB3</i> | miR-6767-5p                 | 1 |
| <i>circADGRB3</i> | miR-6768-5p                 | 3 |
| <i>circADGRB3</i> | miR-6769a-3p                | 1 |
| <i>circADGRB3</i> | miR-6770-3p                 | 1 |
| <i>circADGRB3</i> | miR-6773-3p                 | 2 |
| <i>circADGRB3</i> | miR-6779-3p                 | 1 |
| <i>circADGRB3</i> | miR-6786-3p                 | 1 |
| <i>circADGRB3</i> | miR-6786-5p                 | 1 |
| <i>circADGRB3</i> | miR-6793-5p                 | 1 |
| <i>circADGRB3</i> | miR-6795-3p                 | 1 |
| <i>circADGRB3</i> | miR-6796-3p                 | 1 |
| <i>circADGRB3</i> | miR-6796-5p                 | 1 |
| <i>circADGRB3</i> | miR-6798-5p                 | 1 |
| <i>circADGRB3</i> | miR-6800-3p                 | 1 |
| <i>circADGRB3</i> | miR-6805-5p                 | 1 |
| <i>circADGRB3</i> | miR-6809-5p                 | 2 |
| <i>circADGRB3</i> | miR-6816-3p                 | 1 |
| <i>circADGRB3</i> | miR-6820-5p                 | 1 |
| <i>circADGRB3</i> | miR-6830-5p                 | 1 |
| <i>circADGRB3</i> | miR-6834-3p                 | 1 |
| <i>circADGRB3</i> | miR-6838-3p                 | 1 |
| <i>circADGRB3</i> | miR-6841-3p                 | 1 |
| <i>circADGRB3</i> | miR-6845-3p                 | 1 |
| <i>circADGRB3</i> | miR-6853-3p                 | 1 |
| <i>circADGRB3</i> | miR-6854-3p                 | 1 |
| <i>circADGRB3</i> | miR-6854-5p                 | 1 |
| <i>circADGRB3</i> | miR-6858-3p                 | 1 |
| <i>circADGRB3</i> | miR-6872-3p                 | 1 |
| <i>circADGRB3</i> | miR-6874-5p                 | 1 |
| <i>circADGRB3</i> | miR-6885-3p                 | 1 |

|                   |                   |   |
|-------------------|-------------------|---|
| <i>circADGRB3</i> | miR-6886-3p       | 1 |
| <i>circADGRB3</i> | miR-6886-5p       | 1 |
| <i>circADGRB3</i> | miR-6887-3p       | 1 |
| <i>circADGRB3</i> | miR-6889-3p       | 1 |
| <i>circADGRB3</i> | miR-7108-5p       | 1 |
| <i>circADGRB3</i> | miR-7109-3p       | 1 |
| <i>circADGRB3</i> | miR-7114-5p       | 1 |
| <i>circADGRB3</i> | miR-7152-3p       | 1 |
| <i>circADGRB3</i> | miR-7153-3p       | 1 |
| <i>circADGRB3</i> | miR-7155-5p       | 1 |
| <i>circADGRB3</i> | miR-7158-3p       | 1 |
| <i>circADGRB3</i> | miR-744-3p        | 1 |
| <i>circADGRB3</i> | miR-7515          | 1 |
| <i>circADGRB3</i> | miR-7705          | 1 |
| <i>circADGRB3</i> | miR-7844-5p       | 1 |
| <i>circADGRB3</i> | miR-7975          | 1 |
| <i>circADGRB3</i> | miR-8055          | 2 |
| <i>circADGRB3</i> | miR-8076          | 1 |
| <i>circADGRB3</i> | miR-8080          | 1 |
| <i>circADGRB3</i> | miR-875-3p        | 1 |
| <i>circADGRB3</i> | miR-876-3p        | 1 |
| <i>circADGRB3</i> | miR-934           | 1 |
| <i>circADGRB3</i> | miR-938           | 1 |
| <i>circADGRB3</i> | miR-944           | 1 |
| <i>circADGRB3</i> | miR-96-5p/1271-5p | 1 |
| <i>circADGRB3</i> | miR-99-3p         | 1 |
| <i>circAP3B1</i>  | miR-1-3p/206      | 2 |
| <i>circAP3B1</i>  | miR-1-5p          | 1 |
| <i>circAP3B1</i>  | miR-105-5p        | 3 |
| <i>circAP3B1</i>  | miR-10a-3p        | 1 |
| <i>circAP3B1</i>  | miR-1180-5p       | 1 |
| <i>circAP3B1</i>  | miR-1197          | 2 |
| <i>circAP3B1</i>  | miR-1224-5p       | 5 |
| <i>circAP3B1</i>  | miR-1225-5p       | 1 |
| <i>circAP3B1</i>  | miR-1226-3p       | 1 |
| <i>circAP3B1</i>  | miR-1228-3p       | 1 |
| <i>circAP3B1</i>  | miR-1229-5p       | 1 |
| <i>circAP3B1</i>  | miR-1236-3p       | 4 |

|                  |                          |   |
|------------------|--------------------------|---|
| <i>circAP3B1</i> | miR-1236-5p              | 1 |
| <i>circAP3B1</i> | miR-1238-3p              | 1 |
| <i>circAP3B1</i> | miR-124-3p.1             | 1 |
| <i>circAP3B1</i> | miR-1245a/8079           | 1 |
| <i>circAP3B1</i> | miR-1245b-5p             | 1 |
| <i>circAP3B1</i> | miR-1251-3p              | 1 |
| <i>circAP3B1</i> | miR-1252-3p              | 4 |
| <i>circAP3B1</i> | miR-1252-5p              | 4 |
| <i>circAP3B1</i> | miR-1253                 | 1 |
| <i>circAP3B1</i> | miR-1255a/1255b-5p       | 2 |
| <i>circAP3B1</i> | miR-1255b-2-3p           | 1 |
| <i>circAP3B1</i> | miR-1257                 | 3 |
| <i>circAP3B1</i> | miR-1258                 | 2 |
| <i>circAP3B1</i> | miR-1260a/1260b          | 1 |
| <i>circAP3B1</i> | miR-1263                 | 1 |
| <i>circAP3B1</i> | miR-1265                 | 1 |
| <i>circAP3B1</i> | miR-1269                 | 1 |
| <i>circAP3B1</i> | miR-1270                 | 2 |
| <i>circAP3B1</i> | miR-1272                 | 2 |
| <i>circAP3B1</i> | miR-1273d                | 1 |
| <i>circAP3B1</i> | miR-1273e                | 2 |
| <i>circAP3B1</i> | miR-1273g-3p             | 1 |
| <i>circAP3B1</i> | miR-1276                 | 1 |
| <i>circAP3B1</i> | miR-1279                 | 1 |
| <i>circAP3B1</i> | miR-1285-5p              | 1 |
| <i>circAP3B1</i> | miR-1286                 | 3 |
| <i>circAP3B1</i> | miR-1289                 | 1 |
| <i>circAP3B1</i> | miR-1294                 | 1 |
| <i>circAP3B1</i> | miR-1295b-5p/1912        | 2 |
| <i>circAP3B1</i> | miR-1296-3p              | 2 |
| <i>circAP3B1</i> | miR-1298-3p              | 5 |
| <i>circAP3B1</i> | miR-1299                 | 2 |
| <i>circAP3B1</i> | miR-130-3p/301-3p/454-3p | 1 |
| <i>circAP3B1</i> | miR-1307-3p              | 1 |
| <i>circAP3B1</i> | miR-130b-5p              | 2 |
| <i>circAP3B1</i> | miR-1322                 | 2 |
| <i>circAP3B1</i> | miR-1323                 | 1 |
| <i>circAP3B1</i> | miR-133a-3p.1            | 1 |

|                  |                                     |   |
|------------------|-------------------------------------|---|
| <i>circAP3B1</i> | miR-1343-3p                         | 2 |
| <i>circAP3B1</i> | miR-135-5p                          | 4 |
| <i>circAP3B1</i> | miR-141-5p                          | 1 |
| <i>circAP3B1</i> | miR-145-5p                          | 2 |
| <i>circAP3B1</i> | miR-146-5p                          | 1 |
| <i>circAP3B1</i> | miR-1468-3p                         | 3 |
| <i>circAP3B1</i> | miR-146a-3p                         | 2 |
| <i>circAP3B1</i> | miR-148-3p/152-3p                   | 1 |
| <i>circAP3B1</i> | miR-148b-5p/6874-3p                 | 1 |
| <i>circAP3B1</i> | miR-149-3p/4728-5p/6785-5p/6883-5p  | 3 |
| <i>circAP3B1</i> | miR-150-3p                          | 1 |
| <i>circAP3B1</i> | miR-153-5p                          | 1 |
| <i>circAP3B1</i> | miR-15b-3p                          | 1 |
| <i>circAP3B1</i> | miR-16-1-3p                         | 3 |
| <i>circAP3B1</i> | miR-17-5p/20-5p/93-5p/106-5p/519-3p | 4 |
| <i>circAP3B1</i> | miR-181a-2-3p                       | 1 |
| <i>circAP3B1</i> | miR-182-5p                          | 3 |
| <i>circAP3B1</i> | miR-1825                            | 1 |
| <i>circAP3B1</i> | miR-183-5p.2                        | 2 |
| <i>circAP3B1</i> | miR-184                             | 1 |
| <i>circAP3B1</i> | miR-185-3p                          | 1 |
| <i>circAP3B1</i> | miR-186-5p                          | 8 |
| <i>circAP3B1</i> | miR-188-3p                          | 1 |
| <i>circAP3B1</i> | miR-19-3p                           | 2 |
| <i>circAP3B1</i> | miR-1910-3p/6511a-5p                | 2 |
| <i>circAP3B1</i> | miR-192-3p                          | 1 |
| <i>circAP3B1</i> | miR-196b-3p                         | 2 |
| <i>circAP3B1</i> | miR-1972                            | 1 |
| <i>circAP3B1</i> | miR-199-5p                          | 1 |
| <i>circAP3B1</i> | miR-202-5p                          | 2 |
| <i>circAP3B1</i> | miR-203a-3p.1                       | 1 |
| <i>circAP3B1</i> | miR-208-5p                          | 1 |
| <i>circAP3B1</i> | miR-21-5p/590-5p                    | 1 |
| <i>circAP3B1</i> | miR-2110                            | 2 |
| <i>circAP3B1</i> | miR-2115-3p                         | 3 |
| <i>circAP3B1</i> | miR-2115-5p                         | 1 |
| <i>circAP3B1</i> | miR-2116-5p                         | 1 |
| <i>circAP3B1</i> | miR-214-3p/3619-5p                  | 3 |

|                  |                       |   |
|------------------|-----------------------|---|
| <i>circAP3B1</i> | miR-216a-5p           | 1 |
| <i>circAP3B1</i> | miR-216b-5p           | 1 |
| <i>circAP3B1</i> | miR-219a-1-3p         | 1 |
| <i>circAP3B1</i> | miR-22-5p             | 1 |
| <i>circAP3B1</i> | miR-2276-5p           | 1 |
| <i>circAP3B1</i> | miR-2277-3p           | 2 |
| <i>circAP3B1</i> | miR-2392              | 2 |
| <i>circAP3B1</i> | miR-2467-5p           | 1 |
| <i>circAP3B1</i> | miR-27b-5p            | 1 |
| <i>circAP3B1</i> | miR-2909              | 1 |
| <i>circAP3B1</i> | miR-299-5p            | 1 |
| <i>circAP3B1</i> | miR-29a-5p            | 1 |
| <i>circAP3B1</i> | miR-30-3p             | 2 |
| <i>circAP3B1</i> | miR-302b-5p/302d-5p   | 2 |
| <i>circAP3B1</i> | miR-302f              | 2 |
| <i>circAP3B1</i> | miR-3064-5p           | 1 |
| <i>circAP3B1</i> | miR-31-5p             | 1 |
| <i>circAP3B1</i> | miR-3120-3p           | 2 |
| <i>circAP3B1</i> | miR-3123              | 1 |
| <i>circAP3B1</i> | miR-3125/3916/6859-5p | 3 |
| <i>circAP3B1</i> | miR-3126-3p           | 5 |
| <i>circAP3B1</i> | miR-3130-3p           | 2 |
| <i>circAP3B1</i> | miR-3130-5p/4482-5p   | 2 |
| <i>circAP3B1</i> | miR-3133              | 8 |
| <i>circAP3B1</i> | miR-3135a             | 1 |
| <i>circAP3B1</i> | miR-3138              | 1 |
| <i>circAP3B1</i> | miR-3140-5p           | 1 |
| <i>circAP3B1</i> | miR-3145-5p           | 3 |
| <i>circAP3B1</i> | miR-3148              | 5 |
| <i>circAP3B1</i> | miR-3150a-3p          | 2 |
| <i>circAP3B1</i> | miR-3150b-3p          | 2 |
| <i>circAP3B1</i> | miR-3151-3p           | 2 |
| <i>circAP3B1</i> | miR-3151-5p           | 2 |
| <i>circAP3B1</i> | miR-3154              | 3 |
| <i>circAP3B1</i> | miR-3156-3p           | 1 |
| <i>circAP3B1</i> | miR-3162-5p           | 1 |
| <i>circAP3B1</i> | miR-3168              | 1 |
| <i>circAP3B1</i> | miR-3169              | 3 |



|                  |                     |   |
|------------------|---------------------|---|
| <i>circAP3B1</i> | miR-3173-3p/6891-5p | 1 |
| <i>circAP3B1</i> | miR-3174            | 3 |
| <i>circAP3B1</i> | miR-3175            | 2 |
| <i>circAP3B1</i> | miR-3176/3922-3p    | 1 |
| <i>circAP3B1</i> | miR-3180-5p         | 1 |
| <i>circAP3B1</i> | miR-3182            | 2 |
| <i>circAP3B1</i> | miR-3187-3p         | 2 |
| <i>circAP3B1</i> | miR-3188            | 1 |
| <i>circAP3B1</i> | miR-3190-5p         | 1 |
| <i>circAP3B1</i> | miR-3192-3p         | 4 |
| <i>circAP3B1</i> | miR-320             | 2 |
| <i>circAP3B1</i> | miR-3200-5p         | 7 |
| <i>circAP3B1</i> | miR-3202            | 1 |
| <i>circAP3B1</i> | miR-323-3p          | 1 |
| <i>circAP3B1</i> | miR-326             | 1 |
| <i>circAP3B1</i> | miR-330-3p          | 3 |
| <i>circAP3B1</i> | miR-330-3p.2        | 3 |
| <i>circAP3B1</i> | miR-335-5p          | 2 |
| <i>circAP3B1</i> | miR-338-3p          | 1 |
| <i>circAP3B1</i> | miR-345-3p          | 1 |
| <i>circAP3B1</i> | miR-34b-5p/449c-5p  | 2 |
| <i>circAP3B1</i> | miR-3607-3p         | 1 |
| <i>circAP3B1</i> | miR-361-5p          | 1 |
| <i>circAP3B1</i> | miR-3611            | 3 |
| <i>circAP3B1</i> | miR-3612            | 1 |
| <i>circAP3B1</i> | miR-3613-3p         | 2 |
| <i>circAP3B1</i> | miR-3614-5p         | 1 |
| <i>circAP3B1</i> | miR-3646            | 4 |
| <i>circAP3B1</i> | miR-3653-3p         | 2 |
| <i>circAP3B1</i> | miR-3655            | 1 |
| <i>circAP3B1</i> | miR-3658            | 1 |
| <i>circAP3B1</i> | miR-3662            | 2 |
| <i>circAP3B1</i> | miR-3663-5p         | 1 |
| <i>circAP3B1</i> | miR-3668            | 1 |
| <i>circAP3B1</i> | miR-3671            | 1 |
| <i>circAP3B1</i> | miR-3675-5p         | 1 |
| <i>circAP3B1</i> | miR-3678-5p         | 1 |
| <i>circAP3B1</i> | miR-3681-5p         | 4 |

|                  |                                   |   |
|------------------|-----------------------------------|---|
| <i>circAP3B1</i> | miR-3682-3p                       | 5 |
| <i>circAP3B1</i> | miR-3685                          | 2 |
| <i>circAP3B1</i> | miR-3689a-5p/3689b-5p/3689e/3689f | 1 |
| <i>circAP3B1</i> | miR-3690                          | 3 |
| <i>circAP3B1</i> | miR-3691-3p                       | 1 |
| <i>circAP3B1</i> | miR-371-5p                        | 1 |
| <i>circAP3B1</i> | miR-3713                          | 1 |
| <i>circAP3B1</i> | miR-3714                          | 1 |
| <i>circAP3B1</i> | miR-371b-5p/373-5p/616-5p         | 1 |
| <i>circAP3B1</i> | miR-372-5p                        | 1 |
| <i>circAP3B1</i> | miR-378-3p                        | 2 |
| <i>circAP3B1</i> | miR-378j/6839-5p                  | 1 |
| <i>circAP3B1</i> | miR-379-5p                        | 1 |
| <i>circAP3B1</i> | miR-380-3p                        | 1 |
| <i>circAP3B1</i> | miR-382-3p                        | 1 |
| <i>circAP3B1</i> | miR-383-5p.2                      | 2 |
| <i>circAP3B1</i> | miR-384                           | 2 |
| <i>circAP3B1</i> | miR-3908                          | 2 |
| <i>circAP3B1</i> | miR-3910                          | 1 |
| <i>circAP3B1</i> | miR-3913-3p                       | 1 |
| <i>circAP3B1</i> | miR-3914                          | 1 |
| <i>circAP3B1</i> | miR-3915                          | 5 |
| <i>circAP3B1</i> | miR-3919                          | 1 |
| <i>circAP3B1</i> | miR-3922-5p                       | 1 |
| <i>circAP3B1</i> | miR-3925-3p                       | 2 |
| <i>circAP3B1</i> | miR-3925-5p                       | 1 |
| <i>circAP3B1</i> | miR-3928-3p                       | 5 |
| <i>circAP3B1</i> | miR-3942-3p                       | 4 |
| <i>circAP3B1</i> | miR-3942-5p                       | 2 |
| <i>circAP3B1</i> | miR-3975                          | 1 |
| <i>circAP3B1</i> | miR-3976                          | 2 |
| <i>circAP3B1</i> | miR-411-5p.2                      | 2 |
| <i>circAP3B1</i> | miR-421                           | 1 |
| <i>circAP3B1</i> | miR-4254                          | 3 |
| <i>circAP3B1</i> | miR-4257                          | 1 |
| <i>circAP3B1</i> | miR-4267                          | 3 |
| <i>circAP3B1</i> | miR-4268                          | 1 |
| <i>circAP3B1</i> | miR-4274                          | 3 |

|                  |                     |   |
|------------------|---------------------|---|
| <i>circAP3B1</i> | miR-4277            | 2 |
| <i>circAP3B1</i> | miR-4282            | 5 |
| <i>circAP3B1</i> | miR-4293            | 1 |
| <i>circAP3B1</i> | miR-4294            | 1 |
| <i>circAP3B1</i> | miR-4303            | 2 |
| <i>circAP3B1</i> | miR-4307            | 3 |
| <i>circAP3B1</i> | miR-4311            | 1 |
| <i>circAP3B1</i> | miR-4316            | 1 |
| <i>circAP3B1</i> | miR-432-3p          | 2 |
| <i>circAP3B1</i> | miR-4325            | 1 |
| <i>circAP3B1</i> | miR-4422            | 3 |
| <i>circAP3B1</i> | miR-4423-3p         | 2 |
| <i>circAP3B1</i> | miR-4424            | 1 |
| <i>circAP3B1</i> | miR-4426/4647/4662b | 4 |
| <i>circAP3B1</i> | miR-4427            | 4 |
| <i>circAP3B1</i> | miR-4428            | 1 |
| <i>circAP3B1</i> | miR-4433a-3p        | 1 |
| <i>circAP3B1</i> | miR-4434/4516/5703  | 4 |
| <i>circAP3B1</i> | miR-4435            | 2 |
| <i>circAP3B1</i> | miR-4436b-5p        | 1 |
| <i>circAP3B1</i> | miR-4447/4472       | 2 |
| <i>circAP3B1</i> | miR-4448            | 1 |
| <i>circAP3B1</i> | miR-4451            | 1 |
| <i>circAP3B1</i> | miR-4453/4538       | 1 |
| <i>circAP3B1</i> | miR-4459            | 1 |
| <i>circAP3B1</i> | miR-4464/4748       | 1 |
| <i>circAP3B1</i> | miR-4468            | 2 |
| <i>circAP3B1</i> | miR-4470            | 2 |
| <i>circAP3B1</i> | miR-4476/6876-5p    | 4 |
| <i>circAP3B1</i> | miR-4477a           | 3 |
| <i>circAP3B1</i> | miR-4480            | 1 |
| <i>circAP3B1</i> | miR-4481/4745-5p    | 3 |
| <i>circAP3B1</i> | miR-4482-3p         | 2 |
| <i>circAP3B1</i> | miR-4484            | 1 |
| <i>circAP3B1</i> | miR-4490            | 2 |
| <i>circAP3B1</i> | miR-4495            | 2 |
| <i>circAP3B1</i> | miR-4496            | 5 |
| <i>circAP3B1</i> | miR-4504            | 2 |

|                  |                       |   |
|------------------|-----------------------|---|
| <i>circAP3B1</i> | miR-4511              | 1 |
| <i>circAP3B1</i> | miR-4517              | 1 |
| <i>circAP3B1</i> | miR-4519              | 3 |
| <i>circAP3B1</i> | miR-4522              | 3 |
| <i>circAP3B1</i> | miR-4524-5p           | 2 |
| <i>circAP3B1</i> | miR-4524a-3p          | 1 |
| <i>circAP3B1</i> | miR-4524b-3p          | 2 |
| <i>circAP3B1</i> | miR-4530              | 1 |
| <i>circAP3B1</i> | miR-4531              | 2 |
| <i>circAP3B1</i> | miR-4533              | 1 |
| <i>circAP3B1</i> | miR-4535              | 1 |
| <i>circAP3B1</i> | miR-4633-3p/6500-5p   | 1 |
| <i>circAP3B1</i> | miR-4633-5p           | 2 |
| <i>circAP3B1</i> | miR-4635              | 2 |
| <i>circAP3B1</i> | miR-4638-3p           | 2 |
| <i>circAP3B1</i> | miR-4638-5p           | 1 |
| <i>circAP3B1</i> | miR-4639-5p           | 2 |
| <i>circAP3B1</i> | miR-4645-3p           | 5 |
| <i>circAP3B1</i> | miR-4649-3p           | 2 |
| <i>circAP3B1</i> | miR-4650-3p           | 1 |
| <i>circAP3B1</i> | miR-4650-5p           | 1 |
| <i>circAP3B1</i> | miR-4659a-3p/4659b-3p | 3 |
| <i>circAP3B1</i> | miR-4660              | 1 |
| <i>circAP3B1</i> | miR-4662a-3p          | 1 |
| <i>circAP3B1</i> | miR-4668-3p           | 2 |
| <i>circAP3B1</i> | miR-4670-3p           | 2 |
| <i>circAP3B1</i> | miR-4677-3p           | 2 |
| <i>circAP3B1</i> | miR-4679              | 2 |
| <i>circAP3B1</i> | miR-4680-3p           | 4 |
| <i>circAP3B1</i> | miR-4680-5p           | 2 |
| <i>circAP3B1</i> | miR-4681              | 1 |
| <i>circAP3B1</i> | miR-4684-3p           | 1 |
| <i>circAP3B1</i> | miR-4687-3p           | 1 |
| <i>circAP3B1</i> | miR-4689/6858-5p      | 5 |
| <i>circAP3B1</i> | miR-4690-5p           | 3 |
| <i>circAP3B1</i> | miR-4691-3p           | 2 |
| <i>circAP3B1</i> | miR-4691-5p/6792-3p   | 2 |
| <i>circAP3B1</i> | miR-4693-3p           | 2 |

|                  |                     |   |
|------------------|---------------------|---|
| <i>circAP3B1</i> | miR-4695-5p         | 2 |
| <i>circAP3B1</i> | miR-4696            | 2 |
| <i>circAP3B1</i> | miR-4698            | 4 |
| <i>circAP3B1</i> | miR-4699-5p         | 3 |
| <i>circAP3B1</i> | miR-4704-3p         | 1 |
| <i>circAP3B1</i> | miR-4709-3p         | 5 |
| <i>circAP3B1</i> | miR-4719            | 1 |
| <i>circAP3B1</i> | miR-4722-5p         | 3 |
| <i>circAP3B1</i> | miR-4728-3p         | 2 |
| <i>circAP3B1</i> | miR-4733-3p         | 1 |
| <i>circAP3B1</i> | miR-4735-5p         | 2 |
| <i>circAP3B1</i> | miR-4739            | 2 |
| <i>circAP3B1</i> | miR-4751            | 4 |
| <i>circAP3B1</i> | miR-4755-5p/5006-3p | 1 |
| <i>circAP3B1</i> | miR-4756-3p         | 1 |
| <i>circAP3B1</i> | miR-4757-3p         | 1 |
| <i>circAP3B1</i> | miR-4757-5p/6744-3p | 1 |
| <i>circAP3B1</i> | miR-4759            | 3 |
| <i>circAP3B1</i> | miR-4762-3p         | 6 |
| <i>circAP3B1</i> | miR-4763-5p         | 1 |
| <i>circAP3B1</i> | miR-4765            | 1 |
| <i>circAP3B1</i> | miR-4766-5p         | 2 |
| <i>circAP3B1</i> | miR-4768-3p         | 1 |
| <i>circAP3B1</i> | miR-4773            | 2 |
| <i>circAP3B1</i> | miR-4774-5p         | 2 |
| <i>circAP3B1</i> | miR-4776-5p         | 1 |
| <i>circAP3B1</i> | miR-4777-3p         | 1 |
| <i>circAP3B1</i> | miR-4777-5p         | 1 |
| <i>circAP3B1</i> | miR-4778-5p         | 5 |
| <i>circAP3B1</i> | miR-4779            | 2 |
| <i>circAP3B1</i> | miR-4782-5p/5706    | 2 |
| <i>circAP3B1</i> | miR-4786-5p         | 1 |
| <i>circAP3B1</i> | miR-4790-3p         | 2 |
| <i>circAP3B1</i> | miR-4793-3p         | 2 |
| <i>circAP3B1</i> | miR-4795-5p         | 1 |
| <i>circAP3B1</i> | miR-4799-5p         | 2 |
| <i>circAP3B1</i> | miR-4800-5p         | 1 |
| <i>circAP3B1</i> | miR-4804-5p         | 1 |

|                  |                             |   |
|------------------|-----------------------------|---|
| <i>circAP3B1</i> | miR-483-3p.1                | 3 |
| <i>circAP3B1</i> | miR-483-3p.2                | 1 |
| <i>circAP3B1</i> | miR-485-5p                  | 1 |
| <i>circAP3B1</i> | miR-488-3p                  | 3 |
| <i>circAP3B1</i> | miR-490-3p                  | 2 |
| <i>circAP3B1</i> | miR-491-5p                  | 2 |
| <i>circAP3B1</i> | miR-493-3p                  | 1 |
| <i>circAP3B1</i> | miR-495-3p                  | 2 |
| <i>circAP3B1</i> | miR-499a-3p/499b-3p         | 1 |
| <i>circAP3B1</i> | miR-5000-3p                 | 1 |
| <i>circAP3B1</i> | miR-5000-5p                 | 1 |
| <i>circAP3B1</i> | miR-5004-5p                 | 4 |
| <i>circAP3B1</i> | miR-5007-5p                 | 2 |
| <i>circAP3B1</i> | miR-5009-3p                 | 2 |
| <i>circAP3B1</i> | miR-5009-5p/8058            | 1 |
| <i>circAP3B1</i> | miR-500a-3p                 | 1 |
| <i>circAP3B1</i> | miR-502-5p                  | 1 |
| <i>circAP3B1</i> | miR-504-3p                  | 1 |
| <i>circAP3B1</i> | miR-505-3p.1                | 2 |
| <i>circAP3B1</i> | miR-505-3p.2                | 1 |
| <i>circAP3B1</i> | miR-508-5p                  | 3 |
| <i>circAP3B1</i> | miR-509-3p                  | 1 |
| <i>circAP3B1</i> | miR-5092                    | 2 |
| <i>circAP3B1</i> | miR-5094                    | 1 |
| <i>circAP3B1</i> | miR-5096                    | 1 |
| <i>circAP3B1</i> | miR-5100                    | 1 |
| <i>circAP3B1</i> | miR-513c-5p/514b-5p         | 1 |
| <i>circAP3B1</i> | miR-514a-3p                 | 2 |
| <i>circAP3B1</i> | miR-515-5p/519e-5p          | 1 |
| <i>circAP3B1</i> | miR-516a-3p/516b-3p/7162-5p | 1 |
| <i>circAP3B1</i> | miR-516b-5p                 | 2 |
| <i>circAP3B1</i> | miR-5187-3p                 | 4 |
| <i>circAP3B1</i> | miR-518a-5p/527             | 2 |
| <i>circAP3B1</i> | miR-518c-5p                 | 1 |
| <i>circAP3B1</i> | miR-518d-5p/519-5p          | 1 |
| <i>circAP3B1</i> | miR-5190                    | 6 |
| <i>circAP3B1</i> | miR-5193                    | 2 |
| <i>circAP3B1</i> | miR-5197-3p                 | 4 |

|                  |                                               |   |
|------------------|-----------------------------------------------|---|
| <i>circAP3B1</i> | miR-519d-5p                                   | 3 |
| <i>circAP3B1</i> | miR-524-3p/525-3p                             | 1 |
| <i>circAP3B1</i> | miR-525-5p                                    | 2 |
| <i>circAP3B1</i> | miR-526b-5p                                   | 1 |
| <i>circAP3B1</i> | miR-539-3p                                    | 1 |
| <i>circAP3B1</i> | miR-539-5p                                    | 2 |
| <i>circAP3B1</i> | miR-542-3p                                    | 2 |
| <i>circAP3B1</i> | miR-543                                       | 1 |
| <i>circAP3B1</i> | miR-544a                                      | 1 |
| <i>circAP3B1</i> | miR-545-3p                                    | 1 |
| <i>circAP3B1</i> | miR-548ah-5p/3609                             | 4 |
| <i>circAP3B1</i> | miR-548aj-5p/548f-5p/548g-5p/548x-5p          | 3 |
| <i>circAP3B1</i> | miR-548an                                     | 1 |
| <i>circAP3B1</i> | miR-548ao-5p/548ax                            | 2 |
| <i>circAP3B1</i> | miR-548at-5p                                  | 1 |
| <i>circAP3B1</i> | miR-548aw                                     | 2 |
| <i>circAP3B1</i> | miR-548az-3p/548ar-3p/548a-3p/548e-3p/548f-3p | 4 |
| <i>circAP3B1</i> | miR-548az-5p/548t-5p                          | 1 |
| <i>circAP3B1</i> | miR-548b-3p                                   | 1 |
| <i>circAP3B1</i> | miR-548c-3p                                   | 3 |
| <i>circAP3B1</i> | miR-548e-5p                                   | 6 |
| <i>circAP3B1</i> | miR-548g-3p                                   | 2 |
| <i>circAP3B1</i> | miR-548n                                      | 1 |
| <i>circAP3B1</i> | miR-548p                                      | 2 |
| <i>circAP3B1</i> | miR-548s                                      | 2 |
| <i>circAP3B1</i> | miR-5571-3p                                   | 1 |
| <i>circAP3B1</i> | miR-5571-5p                                   | 1 |
| <i>circAP3B1</i> | miR-5579-5p                                   | 1 |
| <i>circAP3B1</i> | miR-5580-3p                                   | 4 |
| <i>circAP3B1</i> | miR-5580-5p                                   | 3 |
| <i>circAP3B1</i> | miR-5582-3p                                   | 4 |
| <i>circAP3B1</i> | miR-5583-3p                                   | 1 |
| <i>circAP3B1</i> | miR-5584-3p                                   | 1 |
| <i>circAP3B1</i> | miR-5585-5p                                   | 2 |
| <i>circAP3B1</i> | miR-5586-3p                                   | 4 |
| <i>circAP3B1</i> | miR-5586-5p                                   | 2 |
| <i>circAP3B1</i> | miR-5591-3p                                   | 1 |
| <i>circAP3B1</i> | miR-561-3p                                    | 1 |

|                  |                 |   |
|------------------|-----------------|---|
| <i>circAP3B1</i> | miR-566         | 1 |
| <i>circAP3B1</i> | miR-5682        | 1 |
| <i>circAP3B1</i> | miR-5687        | 1 |
| <i>circAP3B1</i> | miR-5694        | 2 |
| <i>circAP3B1</i> | miR-5695        | 3 |
| <i>circAP3B1</i> | miR-5696        | 1 |
| <i>circAP3B1</i> | miR-5697        | 2 |
| <i>circAP3B1</i> | miR-570-3p      | 3 |
| <i>circAP3B1</i> | miR-5701        | 2 |
| <i>circAP3B1</i> | miR-5702        | 3 |
| <i>circAP3B1</i> | miR-571         | 1 |
| <i>circAP3B1</i> | miR-576-3p      | 2 |
| <i>circAP3B1</i> | miR-579-3p      | 1 |
| <i>circAP3B1</i> | miR-583         | 1 |
| <i>circAP3B1</i> | miR-585-5p      | 1 |
| <i>circAP3B1</i> | miR-588         | 2 |
| <i>circAP3B1</i> | miR-589-3p      | 1 |
| <i>circAP3B1</i> | miR-589-5p      | 1 |
| <i>circAP3B1</i> | miR-593-5p      | 1 |
| <i>circAP3B1</i> | miR-596         | 1 |
| <i>circAP3B1</i> | miR-606         | 1 |
| <i>circAP3B1</i> | miR-607         | 2 |
| <i>circAP3B1</i> | miR-6071        | 2 |
| <i>circAP3B1</i> | miR-6074        | 1 |
| <i>circAP3B1</i> | miR-6077        | 3 |
| <i>circAP3B1</i> | miR-6079        | 2 |
| <i>circAP3B1</i> | miR-6124        | 5 |
| <i>circAP3B1</i> | miR-6126        | 2 |
| <i>circAP3B1</i> | miR-6128        | 2 |
| <i>circAP3B1</i> | miR-6134        | 2 |
| <i>circAP3B1</i> | miR-6165        | 3 |
| <i>circAP3B1</i> | miR-619-3p      | 1 |
| <i>circAP3B1</i> | miR-624-3p      | 1 |
| <i>circAP3B1</i> | miR-629-3p      | 1 |
| <i>circAP3B1</i> | miR-633         | 1 |
| <i>circAP3B1</i> | miR-634         | 2 |
| <i>circAP3B1</i> | miR-641/3617-5p | 3 |
| <i>circAP3B1</i> | miR-642a-5p     | 1 |



|                  |                     |   |
|------------------|---------------------|---|
| <i>circAP3B1</i> | miR-643             | 1 |
| <i>circAP3B1</i> | miR-647             | 1 |
| <i>circAP3B1</i> | miR-649             | 2 |
| <i>circAP3B1</i> | miR-6499-3p         | 4 |
| <i>circAP3B1</i> | miR-6500-3p         | 1 |
| <i>circAP3B1</i> | miR-6505-5p         | 2 |
| <i>circAP3B1</i> | miR-6507-5p         | 2 |
| <i>circAP3B1</i> | miR-6508-5p/8067    | 1 |
| <i>circAP3B1</i> | miR-6509-3p         | 1 |
| <i>circAP3B1</i> | miR-651-3p          | 5 |
| <i>circAP3B1</i> | miR-6510-5p         | 3 |
| <i>circAP3B1</i> | miR-6515-3p         | 4 |
| <i>circAP3B1</i> | miR-656-3p          | 2 |
| <i>circAP3B1</i> | miR-660-3p          | 2 |
| <i>circAP3B1</i> | miR-660-5p          | 1 |
| <i>circAP3B1</i> | miR-665             | 2 |
| <i>circAP3B1</i> | miR-668-3p          | 2 |
| <i>circAP3B1</i> | miR-670-3p          | 1 |
| <i>circAP3B1</i> | miR-6720-5p         | 1 |
| <i>circAP3B1</i> | miR-6731-5p/8085    | 1 |
| <i>circAP3B1</i> | miR-6736-3p         | 2 |
| <i>circAP3B1</i> | miR-6738-3p         | 1 |
| <i>circAP3B1</i> | miR-6739-3p         | 1 |
| <i>circAP3B1</i> | miR-6742-5p         | 2 |
| <i>circAP3B1</i> | miR-6744-5p         | 2 |
| <i>circAP3B1</i> | miR-6746-5p         | 1 |
| <i>circAP3B1</i> | miR-6749-3p         | 2 |
| <i>circAP3B1</i> | miR-6750-3p         | 1 |
| <i>circAP3B1</i> | miR-6758-5p/6856-5p | 1 |
| <i>circAP3B1</i> | miR-676-5p          | 2 |
| <i>circAP3B1</i> | miR-6760-5p         | 2 |
| <i>circAP3B1</i> | miR-6764-3p/6824-3p | 1 |
| <i>circAP3B1</i> | miR-6768-3p         | 1 |
| <i>circAP3B1</i> | miR-6770-5p         | 1 |
| <i>circAP3B1</i> | miR-6776-5p         | 1 |
| <i>circAP3B1</i> | miR-6777-3p         | 1 |
| <i>circAP3B1</i> | miR-6778-3p         | 1 |
| <i>circAP3B1</i> | miR-6780a-3p        | 2 |

|                  |                     |   |
|------------------|---------------------|---|
| <i>circAP3B1</i> | miR-6789-3p         | 1 |
| <i>circAP3B1</i> | miR-6791-3p/6829-3p | 1 |
| <i>circAP3B1</i> | miR-6799-5p         | 3 |
| <i>circAP3B1</i> | miR-6800-3p         | 1 |
| <i>circAP3B1</i> | miR-6804-3p         | 1 |
| <i>circAP3B1</i> | miR-6809-5p         | 1 |
| <i>circAP3B1</i> | miR-6810-5p         | 2 |
| <i>circAP3B1</i> | miR-6815-3p         | 1 |
| <i>circAP3B1</i> | miR-6815-5p/6865-5p | 2 |
| <i>circAP3B1</i> | miR-6825-5p         | 2 |
| <i>circAP3B1</i> | miR-6826-5p         | 2 |
| <i>circAP3B1</i> | miR-6828-3p         | 2 |
| <i>circAP3B1</i> | miR-6842-3p         | 1 |
| <i>circAP3B1</i> | miR-6846-3p         | 1 |
| <i>circAP3B1</i> | miR-6847-5p         | 1 |
| <i>circAP3B1</i> | miR-6856-3p         | 1 |
| <i>circAP3B1</i> | miR-6857-5p         | 2 |
| <i>circAP3B1</i> | miR-6859-3p         | 1 |
| <i>circAP3B1</i> | miR-6861-5p         | 1 |
| <i>circAP3B1</i> | miR-6864-5p         | 2 |
| <i>circAP3B1</i> | miR-6874-5p         | 1 |
| <i>circAP3B1</i> | miR-6875-3p         | 3 |
| <i>circAP3B1</i> | miR-6878-3p         | 1 |
| <i>circAP3B1</i> | miR-6878-5p         | 1 |
| <i>circAP3B1</i> | miR-6881-3p         | 2 |
| <i>circAP3B1</i> | miR-6884-3p         | 1 |
| <i>circAP3B1</i> | miR-6888-5p         | 2 |
| <i>circAP3B1</i> | miR-6890-3p         | 1 |
| <i>circAP3B1</i> | miR-6890-5p         | 1 |
| <i>circAP3B1</i> | miR-6892-3p         | 1 |
| <i>circAP3B1</i> | miR-6894-5p         | 3 |
| <i>circAP3B1</i> | miR-7-3p            | 1 |
| <i>circAP3B1</i> | miR-7-5p            | 3 |
| <i>circAP3B1</i> | miR-7106-5p         | 3 |
| <i>circAP3B1</i> | miR-7109-3p         | 2 |
| <i>circAP3B1</i> | miR-711             | 1 |
| <i>circAP3B1</i> | miR-7111-3p         | 2 |
| <i>circAP3B1</i> | miR-7151-5p         | 1 |

|                  |                    |   |
|------------------|--------------------|---|
| <i>circAP3B1</i> | miR-7152-3p        | 1 |
| <i>circAP3B1</i> | miR-7154-3p        | 3 |
| <i>circAP3B1</i> | miR-7159-3p        | 2 |
| <i>circAP3B1</i> | miR-7159-5p        | 1 |
| <i>circAP3B1</i> | miR-7161-3p        | 2 |
| <i>circAP3B1</i> | miR-7162-3p        | 2 |
| <i>circAP3B1</i> | miR-759            | 1 |
| <i>circAP3B1</i> | miR-7641           | 2 |
| <i>circAP3B1</i> | miR-765            | 3 |
| <i>circAP3B1</i> | miR-766-3p         | 2 |
| <i>circAP3B1</i> | miR-766-5p         | 3 |
| <i>circAP3B1</i> | miR-767-5p         | 1 |
| <i>circAP3B1</i> | miR-769-5p         | 1 |
| <i>circAP3B1</i> | miR-770-5p         | 1 |
| <i>circAP3B1</i> | miR-7703           | 1 |
| <i>circAP3B1</i> | miR-7844-5p        | 1 |
| <i>circAP3B1</i> | miR-7847-3p        | 2 |
| <i>circAP3B1</i> | miR-7851-3p        | 1 |
| <i>circAP3B1</i> | miR-7852-3p        | 1 |
| <i>circAP3B1</i> | miR-7854-3p        | 2 |
| <i>circAP3B1</i> | miR-7856-5p        | 2 |
| <i>circAP3B1</i> | miR-7974           | 1 |
| <i>circAP3B1</i> | miR-7975           | 1 |
| <i>circAP3B1</i> | miR-8062           | 1 |
| <i>circAP3B1</i> | miR-8063           | 4 |
| <i>circAP3B1</i> | miR-8075           | 1 |
| <i>circAP3B1</i> | miR-8083           | 3 |
| <i>circAP3B1</i> | miR-873-5p.1       | 2 |
| <i>circAP3B1</i> | miR-873-5p.2       | 3 |
| <i>circAP3B1</i> | miR-875-5p         | 1 |
| <i>circAP3B1</i> | miR-885-3p         | 1 |
| <i>circAP3B1</i> | miR-888-5p         | 1 |
| <i>circAP3B1</i> | miR-889-5p         | 4 |
| <i>circAP3B1</i> | miR-9-3p           | 1 |
| <i>circAP3B1</i> | miR-9-5p           | 2 |
| <i>circAP3B1</i> | miR-922            | 3 |
| <i>circAP3B1</i> | miR-935            | 1 |
| <i>circAP3B1</i> | miR-939-5p/1343-5p | 2 |

|                  |                                      |   |
|------------------|--------------------------------------|---|
| <i>circAP3B1</i> | miR-940/6808-5p/6893-5p              | 2 |
| <i>circAP3B1</i> | miR-944                              | 2 |
| <i>circAP3B1</i> | miR-96-5p/1271-5p                    | 3 |
| <i>circAP3B1</i> | miR-101-3p.1                         | 2 |
| <i>circAP3B1</i> | miR-103-3p/107                       | 1 |
| <i>circAP3B1</i> | miR-1184                             | 1 |
| <i>circAP3B1</i> | miR-1205                             | 1 |
| <i>circAP3B1</i> | miR-1231                             | 1 |
| <i>circAP3B1</i> | miR-1245b-3p                         | 1 |
| <i>circAP3B1</i> | miR-125-5p                           | 1 |
| <i>circAP3B1</i> | miR-126-5p                           | 1 |
| <i>circAP3B1</i> | miR-1266-3p                          | 1 |
| <i>circAP3B1</i> | miR-1267                             | 1 |
| <i>circAP3B1</i> | miR-127-5p                           | 2 |
| <i>circAP3B1</i> | miR-1273g-5p                         | 2 |
| <i>circAP3B1</i> | miR-1273h-3p                         | 1 |
| <i>circAP3B1</i> | miR-1295b-3p                         | 1 |
| <i>circAP3B1</i> | miR-1301-3p                          | 1 |
| <i>circAP3B1</i> | miR-1304-5p                          | 1 |
| <i>circAP3B1</i> | miR-132-3p/212-3p                    | 1 |
| <i>circAP3B1</i> | miR-133a-3p.2/133b                   | 1 |
| <i>circAP3B1</i> | miR-140-5p                           | 2 |
| <i>circAP3B1</i> | miR-144-3p                           | 2 |
| <i>circAP3B1</i> | miR-145-3p                           | 1 |
| <i>circAP3B1</i> | miR-15-5p/16-5p/195-5p/424-5p/497-5p | 1 |
| <i>circAP3B1</i> | miR-17-3p                            | 1 |
| <i>circAP3B1</i> | miR-181-3p/4420                      | 1 |
| <i>circAP3B1</i> | miR-19-5p                            | 1 |
| <i>circAP3B1</i> | miR-1976                             | 1 |
| <i>circAP3B1</i> | miR-203a-5p                          | 2 |
| <i>circAP3B1</i> | miR-204-3p/4646-5p                   | 1 |
| <i>circAP3B1</i> | miR-2052                             | 1 |
| <i>circAP3B1</i> | miR-210-5p                           | 1 |
| <i>circAP3B1</i> | miR-217                              | 2 |
| <i>circAP3B1</i> | miR-223-5p                           | 3 |
| <i>circAP3B1</i> | miR-224-5p                           | 1 |
| <i>circAP3B1</i> | miR-2276-3p                          | 1 |
| <i>circAP3B1</i> | miR-2278                             | 2 |

|                  |                                              |   |
|------------------|----------------------------------------------|---|
| <i>circAP3B1</i> | miR-23-5p                                    | 1 |
| <i>circAP3B1</i> | miR-26-3p                                    | 1 |
| <i>circAP3B1</i> | miR-302a-5p                                  | 1 |
| <i>circAP3B1</i> | miR-3074-3p                                  | 2 |
| <i>circAP3B1</i> | miR-3074-5p                                  | 1 |
| <i>circAP3B1</i> | miR-30b-3p/1273h-5p/3689-3p/6779-5p/6780a-5p |   |
| <i>circAP3B1</i> | miR-30c-3p/6788-5p                           | 1 |
| <i>circAP3B1</i> | miR-3120-5p                                  | 1 |
| <i>circAP3B1</i> | miR-3121-3p                                  | 1 |
| <i>circAP3B1</i> | miR-3145-3p                                  | 1 |
| <i>circAP3B1</i> | miR-3149                                     | 2 |
| <i>circAP3B1</i> | miR-3158-5p                                  | 1 |
| <i>circAP3B1</i> | miR-3192-5p                                  | 1 |
| <i>circAP3B1</i> | miR-32-3p                                    | 1 |
| <i>circAP3B1</i> | miR-323b-5p/410-5p/494-5p                    | 2 |
| <i>circAP3B1</i> | miR-331-3p                                   | 1 |
| <i>circAP3B1</i> | miR-340-5p                                   | 1 |
| <i>circAP3B1</i> | miR-346                                      | 1 |
| <i>circAP3B1</i> | miR-34b-3p                                   | 2 |
| <i>circAP3B1</i> | miR-34c-3p                                   | 2 |
| <i>circAP3B1</i> | miR-3529-3p                                  | 1 |
| <i>circAP3B1</i> | miR-3606-5p                                  | 1 |
| <i>circAP3B1</i> | miR-3653-5p                                  | 1 |
| <i>circAP3B1</i> | miR-3660/4526                                | 2 |
| <i>circAP3B1</i> | miR-367-5p                                   | 1 |
| <i>circAP3B1</i> | miR-3678-3p                                  | 1 |
| <i>circAP3B1</i> | miR-3680-3p                                  | 1 |
| <i>circAP3B1</i> | miR-3692-5p                                  | 1 |
| <i>circAP3B1</i> | miR-3911                                     | 1 |
| <i>circAP3B1</i> | miR-3912-5p                                  | 1 |
| <i>circAP3B1</i> | miR-3923                                     | 3 |
| <i>circAP3B1</i> | miR-3926                                     | 1 |
| <i>circAP3B1</i> | miR-412-3p/6754-3p                           | 1 |
| <i>circAP3B1</i> | miR-425-5p                                   | 1 |
| <i>circAP3B1</i> | miR-4252                                     | 1 |
| <i>circAP3B1</i> | miR-4270/4441/6754-5p                        | 1 |
| <i>circAP3B1</i> | miR-4279                                     | 1 |
| <i>circAP3B1</i> | miR-4314                                     | 1 |

|                  |                             |   |
|------------------|-----------------------------|---|
| <i>circAP3B1</i> | miR-4318                    | 1 |
| <i>circAP3B1</i> | miR-432-5p                  | 1 |
| <i>circAP3B1</i> | miR-4326                    | 2 |
| <i>circAP3B1</i> | miR-4462                    | 1 |
| <i>circAP3B1</i> | miR-4494                    | 1 |
| <i>circAP3B1</i> | miR-449c-3p                 | 1 |
| <i>circAP3B1</i> | miR-4501                    | 1 |
| <i>circAP3B1</i> | miR-4502                    | 2 |
| <i>circAP3B1</i> | miR-450b-5p                 | 1 |
| <i>circAP3B1</i> | miR-451b                    | 1 |
| <i>circAP3B1</i> | miR-4520-3p                 | 1 |
| <i>circAP3B1</i> | miR-4527/6503-5p            | 1 |
| <i>circAP3B1</i> | miR-455-5p                  | 1 |
| <i>circAP3B1</i> | miR-4703-3p                 | 1 |
| <i>circAP3B1</i> | miR-4709-5p                 | 1 |
| <i>circAP3B1</i> | miR-4714-3p                 | 1 |
| <i>circAP3B1</i> | miR-4732-3p                 | 1 |
| <i>circAP3B1</i> | miR-4749-3p                 | 1 |
| <i>circAP3B1</i> | miR-4755-3p                 | 1 |
| <i>circAP3B1</i> | miR-4772-3p                 | 1 |
| <i>circAP3B1</i> | miR-4786-3p                 | 2 |
| <i>circAP3B1</i> | miR-4802-3p                 | 1 |
| <i>circAP3B1</i> | miR-4803                    | 2 |
| <i>circAP3B1</i> | miR-4999-3p                 | 1 |
| <i>circAP3B1</i> | miR-499b-5p                 | 1 |
| <i>circAP3B1</i> | miR-5003-5p                 | 1 |
| <i>circAP3B1</i> | miR-503-5p                  | 1 |
| <i>circAP3B1</i> | miR-506-5p                  | 1 |
| <i>circAP3B1</i> | miR-507/557                 | 1 |
| <i>circAP3B1</i> | miR-509-3-5p/509-5p/4418    | 2 |
| <i>circAP3B1</i> | miR-510-3p                  | 1 |
| <i>circAP3B1</i> | miR-513a-3p/513c-3p/3606-3p | 1 |
| <i>circAP3B1</i> | miR-5187-5p                 | 2 |
| <i>circAP3B1</i> | miR-5189-3p                 | 1 |
| <i>circAP3B1</i> | miR-5197-5p                 | 1 |
| <i>circAP3B1</i> | miR-520g-5p                 | 1 |
| <i>circAP3B1</i> | miR-541-5p                  | 1 |
| <i>circAP3B1</i> | miR-545-5p                  | 1 |

|                  |                               |   |
|------------------|-------------------------------|---|
| <i>circAP3B1</i> | miR-548av-3p                  | 2 |
| <i>circAP3B1</i> | miR-548m                      | 2 |
| <i>circAP3B1</i> | miR-550a-3-5p/550a-5p/1271-3p | 1 |
| <i>circAP3B1</i> | miR-552-5p                    | 2 |
| <i>circAP3B1</i> | miR-5680                      | 3 |
| <i>circAP3B1</i> | miR-5700                      | 1 |
| <i>circAP3B1</i> | miR-575/4676-5p               | 1 |
| <i>circAP3B1</i> | miR-590-3p                    | 1 |
| <i>circAP3B1</i> | miR-595                       | 1 |
| <i>circAP3B1</i> | miR-6080                      | 3 |
| <i>circAP3B1</i> | miR-6081                      | 1 |
| <i>circAP3B1</i> | miR-6090                      | 1 |
| <i>circAP3B1</i> | miR-618                       | 1 |
| <i>circAP3B1</i> | miR-619-5p/6506-5p            | 1 |
| <i>circAP3B1</i> | miR-625-3p                    | 1 |
| <i>circAP3B1</i> | miR-626/6876-3p               | 1 |
| <i>circAP3B1</i> | miR-627-5p                    | 1 |
| <i>circAP3B1</i> | miR-628-5p                    | 1 |
| <i>circAP3B1</i> | miR-630                       | 1 |
| <i>circAP3B1</i> | miR-632/4288                  | 1 |
| <i>circAP3B1</i> | miR-644a                      | 1 |
| <i>circAP3B1</i> | miR-646                       | 1 |
| <i>circAP3B1</i> | miR-648                       | 1 |
| <i>circAP3B1</i> | miR-6516-5p                   | 1 |
| <i>circAP3B1</i> | miR-653-3p                    | 1 |
| <i>circAP3B1</i> | miR-6719-3p                   | 2 |
| <i>circAP3B1</i> | miR-6730-3p                   | 2 |
| <i>circAP3B1</i> | miR-6731-3p                   | 1 |
| <i>circAP3B1</i> | miR-6753-3p/7107-3p           | 1 |
| <i>circAP3B1</i> | miR-6757-5p                   | 1 |
| <i>circAP3B1</i> | miR-6767-3p                   | 1 |
| <i>circAP3B1</i> | miR-6801-3p/6810-3p           | 1 |
| <i>circAP3B1</i> | miR-6836-3p                   | 1 |
| <i>circAP3B1</i> | miR-6837-3p                   | 1 |
| <i>circAP3B1</i> | miR-6843-3p/6848-3p           | 1 |
| <i>circAP3B1</i> | miR-6844                      | 1 |
| <i>circAP3B1</i> | miR-6858-3p                   | 1 |
| <i>circAP3B1</i> | miR-6888-3p                   | 1 |

|                  |                              |   |
|------------------|------------------------------|---|
| <i>circAP3B1</i> | miR-7152-5p                  | 1 |
| <i>circAP3B1</i> | miR-7156-3p                  | 1 |
| <i>circAP3B1</i> | miR-744-3p                   | 2 |
| <i>circAP3B1</i> | miR-7843-3p                  | 2 |
| <i>circAP3B1</i> | miR-7849-3p                  | 1 |
| <i>circAP3B1</i> | miR-7855-5p                  | 1 |
| <i>circAP3B1</i> | miR-802                      | 1 |
| <i>circAP3B1</i> | miR-8055                     | 1 |
| <i>circAP3B1</i> | miR-8074                     | 2 |
| <i>circAP3B1</i> | miR-8076                     | 1 |
| <i>circAP3B1</i> | miR-8081                     | 1 |
| <i>circAP3B1</i> | miR-887-3p                   | 1 |
| <i>circAP3B1</i> | miR-888-3p                   | 2 |
| <i>circAP3B1</i> | miR-890                      | 1 |
| <i>circAP3B1</i> | miR-892-5p                   | 1 |
| <i>circAP3B1</i> | miR-892a                     | 1 |
| <i>circAP3B1</i> | miR-892b                     | 1 |
| <i>circAP3B1</i> | miR-920/4300/5591-5p/6726-5p | 1 |
| <i>circAP3B1</i> | miR-921                      | 1 |
| <i>circAP3B1</i> | miR-924                      | 1 |
| <i>circAP3B1</i> | miR-93-3p                    | 1 |
| <i>circAP3B1</i> | miR-937-5p                   | 1 |
| <i>circAP3B1</i> | miR-100-3p                   | 1 |
| <i>circAP3B1</i> | miR-1178-3p                  | 1 |
| <i>circAP3B1</i> | miR-1193                     | 1 |
| <i>circAP3B1</i> | miR-1207-3p                  | 1 |
| <i>circAP3B1</i> | miR-1207-5p/4763-3p          | 1 |
| <i>circAP3B1</i> | miR-1237-5p/4488/4697-5p     | 1 |
| <i>circAP3B1</i> | miR-1246                     | 1 |
| <i>circAP3B1</i> | miR-1275/4665-5p             | 1 |
| <i>circAP3B1</i> | miR-1277-5p                  | 1 |
| <i>circAP3B1</i> | miR-128-3p                   | 1 |
| <i>circAP3B1</i> | miR-1283                     | 1 |
| <i>circAP3B1</i> | miR-1288-5p                  | 1 |
| <i>circAP3B1</i> | miR-135a-3p                  | 1 |
| <i>circAP3B1</i> | miR-143-5p                   | 1 |
| <i>circAP3B1</i> | miR-151-3p                   | 1 |
| <i>circAP3B1</i> | miR-1537-5p                  | 1 |



|                  |                   |   |
|------------------|-------------------|---|
| <i>circAP3B1</i> | miR-154-3p/487-3p | 1 |
| <i>circAP3B1</i> | miR-155-3p        | 1 |
| <i>circAP3B1</i> | miR-18-5p         | 1 |
| <i>circAP3B1</i> | miR-183-3p        | 1 |
| <i>circAP3B1</i> | miR-183-5p.1      | 1 |
| <i>circAP3B1</i> | miR-190-5p        | 1 |
| <i>circAP3B1</i> | miR-197-3p        | 1 |
| <i>circAP3B1</i> | miR-202-3p        | 1 |
| <i>circAP3B1</i> | miR-205-3p        | 1 |
| <i>circAP3B1</i> | miR-2355-3p       | 1 |
| <i>circAP3B1</i> | miR-29b-1-5p      | 1 |
| <i>circAP3B1</i> | miR-31-3p         | 1 |
| <i>circAP3B1</i> | miR-3117-5p       | 1 |
| <i>circAP3B1</i> | miR-3119          | 1 |
| <i>circAP3B1</i> | miR-3121-5p       | 1 |
| <i>circAP3B1</i> | miR-3127-5p       | 1 |
| <i>circAP3B1</i> | miR-3128          | 2 |
| <i>circAP3B1</i> | miR-3140-3p       | 1 |
| <i>circAP3B1</i> | miR-3146          | 1 |
| <i>circAP3B1</i> | miR-3163          | 1 |
| <i>circAP3B1</i> | miR-3179          | 1 |
| <i>circAP3B1</i> | miR-3185          | 2 |
| <i>circAP3B1</i> | miR-320e          | 1 |
| <i>circAP3B1</i> | miR-323a-5p       | 1 |
| <i>circAP3B1</i> | miR-34-5p/449-5p  | 2 |
| <i>circAP3B1</i> | miR-3614-3p       | 1 |
| <i>circAP3B1</i> | miR-3620-3p       | 1 |
| <i>circAP3B1</i> | miR-3665          | 1 |
| <i>circAP3B1</i> | miR-3682-5p       | 1 |
| <i>circAP3B1</i> | miR-3687/4442     | 1 |
| <i>circAP3B1</i> | miR-3688-3p       | 1 |
| <i>circAP3B1</i> | miR-3689d/6851-5p | 1 |
| <i>circAP3B1</i> | miR-3691-5p       | 1 |
| <i>circAP3B1</i> | miR-376-3p        | 1 |
| <i>circAP3B1</i> | miR-381-3p        | 1 |
| <i>circAP3B1</i> | miR-383-5p.1      | 1 |
| <i>circAP3B1</i> | miR-3917          | 1 |
| <i>circAP3B1</i> | miR-3920          | 1 |

|                  |                             |   |
|------------------|-----------------------------|---|
| <i>circAP3B1</i> | miR-3924                    | 1 |
| <i>circAP3B1</i> | miR-3928-5p/6806-3p         | 1 |
| <i>circAP3B1</i> | miR-3934-3p                 | 1 |
| <i>circAP3B1</i> | miR-3944-5p                 | 1 |
| <i>circAP3B1</i> | miR-3977                    | 1 |
| <i>circAP3B1</i> | miR-3978                    | 1 |
| <i>circAP3B1</i> | miR-409-3p                  | 1 |
| <i>circAP3B1</i> | miR-423-3p                  | 1 |
| <i>circAP3B1</i> | miR-4255                    | 1 |
| <i>circAP3B1</i> | miR-4263                    | 1 |
| <i>circAP3B1</i> | miR-4272                    | 1 |
| <i>circAP3B1</i> | miR-4302                    | 1 |
| <i>circAP3B1</i> | miR-4328                    | 1 |
| <i>circAP3B1</i> | miR-4432                    | 1 |
| <i>circAP3B1</i> | miR-4450                    | 1 |
| <i>circAP3B1</i> | miR-4452                    | 1 |
| <i>circAP3B1</i> | miR-4460                    | 1 |
| <i>circAP3B1</i> | miR-4463                    | 1 |
| <i>circAP3B1</i> | miR-4473                    | 1 |
| <i>circAP3B1</i> | miR-4475                    | 1 |
| <i>circAP3B1</i> | miR-4499                    | 1 |
| <i>circAP3B1</i> | miR-4513/6855-3p            | 1 |
| <i>circAP3B1</i> | miR-4520-5p                 | 1 |
| <i>circAP3B1</i> | miR-455-3p.2                | 1 |
| <i>circAP3B1</i> | miR-4642                    | 1 |
| <i>circAP3B1</i> | miR-4646-3p                 | 1 |
| <i>circAP3B1</i> | miR-4666a-3p                | 1 |
| <i>circAP3B1</i> | miR-4671-3p                 | 1 |
| <i>circAP3B1</i> | miR-4717-3p                 | 1 |
| <i>circAP3B1</i> | miR-4718                    | 1 |
| <i>circAP3B1</i> | miR-4720-5p/4799-3p/5588-5p | 2 |
| <i>circAP3B1</i> | miR-4724-5p                 | 1 |
| <i>circAP3B1</i> | miR-4727-3p                 | 1 |
| <i>circAP3B1</i> | miR-4736                    | 1 |
| <i>circAP3B1</i> | miR-4742-3p                 | 1 |
| <i>circAP3B1</i> | miR-4760-3p                 | 1 |
| <i>circAP3B1</i> | miR-4764-3p                 | 1 |
| <i>circAP3B1</i> | miR-4764-5p                 | 2 |

|                  |                     |   |
|------------------|---------------------|---|
| <i>circAP3B1</i> | miR-4766-3p         | 2 |
| <i>circAP3B1</i> | miR-4772-5p         | 1 |
| <i>circAP3B1</i> | miR-4775            | 1 |
| <i>circAP3B1</i> | miR-4778-3p         | 1 |
| <i>circAP3B1</i> | miR-4781-3p         | 1 |
| <i>circAP3B1</i> | miR-486-3p          | 1 |
| <i>circAP3B1</i> | miR-487a-5p/487b-5p | 1 |
| <i>circAP3B1</i> | miR-488-5p          | 1 |
| <i>circAP3B1</i> | miR-4999-5p         | 1 |
| <i>circAP3B1</i> | miR-524-5p          | 2 |
| <i>circAP3B1</i> | miR-548au-3p        | 2 |
| <i>circAP3B1</i> | miR-548u/7161-5p    | 1 |
| <i>circAP3B1</i> | miR-550b-3p         | 1 |
| <i>circAP3B1</i> | miR-551b-5p         | 1 |
| <i>circAP3B1</i> | miR-5589-3p         | 1 |
| <i>circAP3B1</i> | miR-5681a           | 1 |
| <i>circAP3B1</i> | miR-576-5p          | 1 |
| <i>circAP3B1</i> | miR-640             | 1 |
| <i>circAP3B1</i> | miR-642-3p          | 1 |
| <i>circAP3B1</i> | miR-6501-3p         | 1 |
| <i>circAP3B1</i> | miR-6509-5p         | 1 |
| <i>circAP3B1</i> | miR-657             | 1 |
| <i>circAP3B1</i> | miR-664a-3p         | 1 |
| <i>circAP3B1</i> | miR-6721-5p         | 1 |
| <i>circAP3B1</i> | miR-6730-5p         | 1 |
| <i>circAP3B1</i> | miR-6733-3p         | 1 |
| <i>circAP3B1</i> | miR-6751-5p/6803-5p | 1 |
| <i>circAP3B1</i> | miR-6755-3p         | 1 |
| <i>circAP3B1</i> | miR-6757-3p         | 1 |
| <i>circAP3B1</i> | miR-676-3p          | 1 |
| <i>circAP3B1</i> | miR-6768-5p         | 1 |
| <i>circAP3B1</i> | miR-6783-5p         | 1 |
| <i>circAP3B1</i> | miR-6787-3p         | 1 |
| <i>circAP3B1</i> | miR-6798-5p         | 1 |
| <i>circAP3B1</i> | miR-6846-5p/6848-5p | 1 |
| <i>circAP3B1</i> | miR-6854-3p         | 1 |
| <i>circAP3B1</i> | miR-6857-3p         | 1 |
| <i>circAP3B1</i> | miR-6868-5p         | 2 |

|                  |                      |   |
|------------------|----------------------|---|
| <i>circAP3B1</i> | miR-6885-3p          | 1 |
| <i>circAP3B1</i> | miR-7109-5p          | 1 |
| <i>circAP3B1</i> | miR-7150             | 2 |
| <i>circAP3B1</i> | miR-7515             | 1 |
| <i>circAP3B1</i> | miR-758-3p           | 1 |
| <i>circAP3B1</i> | miR-8056             | 1 |
| <i>circAP3B1</i> | miR-8068             | 1 |
| <i>circAP3B1</i> | miR-8070             | 1 |
| <i>circAP3B1</i> | miR-8087             | 1 |
| <i>circAP3B1</i> | miR-876-3p           | 1 |
| <i>circAP3B1</i> | miR-891b             | 1 |
| <i>circASXL1</i> | miR-1-3p/206         | 2 |
| <i>circASXL1</i> | miR-103b             | 3 |
| <i>circASXL1</i> | miR-10b-3p           | 2 |
| <i>circASXL1</i> | miR-1179             | 2 |
| <i>circASXL1</i> | miR-1184             | 2 |
| <i>circASXL1</i> | miR-1205             | 2 |
| <i>circASXL1</i> | miR-1237-3p          | 2 |
| <i>circASXL1</i> | miR-1244             | 1 |
| <i>circASXL1</i> | miR-1248             | 2 |
| <i>circASXL1</i> | miR-1260a/1260b      | 2 |
| <i>circASXL1</i> | miR-1273h-3p         | 2 |
| <i>circASXL1</i> | miR-1304-5p          | 3 |
| <i>circASXL1</i> | miR-153-5p           | 2 |
| <i>circASXL1</i> | miR-17-3p            | 2 |
| <i>circASXL1</i> | miR-1827             | 2 |
| <i>circASXL1</i> | miR-183-3p           | 2 |
| <i>circASXL1</i> | miR-188-3p           | 2 |
| <i>circASXL1</i> | miR-19-5p            | 2 |
| <i>circASXL1</i> | miR-1910-3p/6511a-5p | 4 |
| <i>circASXL1</i> | miR-1911-3p          | 2 |
| <i>circASXL1</i> | miR-192-5p/215-5p    | 2 |
| <i>circASXL1</i> | miR-200-3p/429       | 1 |
| <i>circASXL1</i> | miR-2052             | 2 |
| <i>circASXL1</i> | miR-2114-5p          | 2 |
| <i>circASXL1</i> | miR-219a-2-3p        | 2 |
| <i>circASXL1</i> | miR-219b-3p          | 2 |
| <i>circASXL1</i> | miR-2276-5p          | 2 |

|                  |                           |   |
|------------------|---------------------------|---|
| <i>circASXL1</i> | miR-2682-3p/6781-3p       | 2 |
| <i>circASXL1</i> | miR-298                   | 2 |
| <i>circASXL1</i> | miR-3156-3p               | 2 |
| <i>circASXL1</i> | miR-3158-5p               | 2 |
| <i>circASXL1</i> | miR-3163                  | 4 |
| <i>circASXL1</i> | miR-3182                  | 2 |
| <i>circASXL1</i> | miR-3183/4723-3p/6769b-3p | 2 |
| <i>circASXL1</i> | miR-324-5p                | 2 |
| <i>circASXL1</i> | miR-34-5p/449-5p          | 4 |
| <i>circASXL1</i> | miR-340-5p                | 2 |
| <i>circASXL1</i> | miR-34b-5p/449c-5p        | 4 |
| <i>circASXL1</i> | miR-3622b-5p              | 2 |
| <i>circASXL1</i> | miR-3668                  | 2 |
| <i>circASXL1</i> | miR-3678-3p               | 2 |
| <i>circASXL1</i> | miR-374-5p/655-3p         | 1 |
| <i>circASXL1</i> | miR-380-3p                | 2 |
| <i>circASXL1</i> | miR-3920                  | 2 |
| <i>circASXL1</i> | miR-3929/4419b/4478       | 2 |
| <i>circASXL1</i> | miR-423-5p                | 2 |
| <i>circASXL1</i> | miR-4263                  | 1 |
| <i>circASXL1</i> | miR-4269/6715b-5p         | 2 |
| <i>circASXL1</i> | miR-4271/4725-3p/6780b-5p | 2 |
| <i>circASXL1</i> | miR-4279                  | 2 |
| <i>circASXL1</i> | miR-4301                  | 2 |
| <i>circASXL1</i> | miR-4328                  | 3 |
| <i>circASXL1</i> | miR-4433a-5p              | 2 |
| <i>circASXL1</i> | miR-4452                  | 2 |
| <i>circASXL1</i> | miR-4461                  | 2 |
| <i>circASXL1</i> | miR-4484                  | 6 |
| <i>circASXL1</i> | miR-4514/4692             | 2 |
| <i>circASXL1</i> | miR-4540                  | 2 |
| <i>circASXL1</i> | miR-4635                  | 2 |
| <i>circASXL1</i> | miR-4645-5p/4673          | 2 |
| <i>circASXL1</i> | miR-4665-3p               | 2 |
| <i>circASXL1</i> | miR-4691-5p/6792-3p       | 2 |
| <i>circASXL1</i> | miR-4727-5p               | 2 |
| <i>circASXL1</i> | miR-4737                  | 2 |
| <i>circASXL1</i> | miR-4742-5p               | 2 |

|                  |                     |   |
|------------------|---------------------|---|
| <i>circASXL1</i> | miR-4747-5p/5196-5p | 3 |
| <i>circASXL1</i> | miR-4755-3p         | 3 |
| <i>circASXL1</i> | miR-483-3p.1        | 1 |
| <i>circASXL1</i> | miR-483-3p.2        | 3 |
| <i>circASXL1</i> | miR-5001-3p         | 2 |
| <i>circASXL1</i> | miR-505-5p          | 2 |
| <i>circASXL1</i> | miR-5193            | 2 |
| <i>circASXL1</i> | miR-5194            | 2 |
| <i>circASXL1</i> | miR-5195-5p         | 2 |
| <i>circASXL1</i> | miR-526b-5p         | 3 |
| <i>circASXL1</i> | miR-544a            | 2 |
| <i>circASXL1</i> | miR-548an           | 6 |
| <i>circASXL1</i> | miR-548au-3p        | 4 |
| <i>circASXL1</i> | miR-5588-3p         | 2 |
| <i>circASXL1</i> | miR-5696            | 2 |
| <i>circASXL1</i> | miR-5708            | 2 |
| <i>circASXL1</i> | miR-576-5p          | 1 |
| <i>circASXL1</i> | miR-579-3p          | 2 |
| <i>circASXL1</i> | miR-597-5p          | 2 |
| <i>circASXL1</i> | miR-6072/6891-3p    | 1 |
| <i>circASXL1</i> | miR-6081            | 2 |
| <i>circASXL1</i> | miR-616-3p          | 2 |
| <i>circASXL1</i> | miR-631/3661        | 2 |
| <i>circASXL1</i> | miR-6505-5p         | 2 |
| <i>circASXL1</i> | miR-652-5p          | 2 |
| <i>circASXL1</i> | miR-660-3p          | 2 |
| <i>circASXL1</i> | miR-6723-5p         | 2 |
| <i>circASXL1</i> | miR-6738-3p         | 2 |
| <i>circASXL1</i> | miR-6749-3p         | 2 |
| <i>circASXL1</i> | miR-6758-3p         | 2 |
| <i>circASXL1</i> | miR-6765-5p         | 3 |
| <i>circASXL1</i> | miR-6768-3p         | 6 |
| <i>circASXL1</i> | miR-6777-3p         | 3 |
| <i>circASXL1</i> | miR-6780a-3p        | 2 |
| <i>circASXL1</i> | miR-6783-5p         | 2 |
| <i>circASXL1</i> | miR-6795-3p         | 2 |
| <i>circASXL1</i> | miR-6836-3p         | 2 |
| <i>circASXL1</i> | miR-6838-3p         | 2 |

|                  |                         |   |
|------------------|-------------------------|---|
| <i>circASXL1</i> | miR-6845-3p             | 2 |
| <i>circASXL1</i> | miR-6868-3p             | 2 |
| <i>circASXL1</i> | miR-6873-5p             | 2 |
| <i>circASXL1</i> | miR-6874-5p             | 2 |
| <i>circASXL1</i> | miR-6881-3p             | 2 |
| <i>circASXL1</i> | miR-6887-3p             | 2 |
| <i>circASXL1</i> | miR-6892-3p             | 2 |
| <i>circASXL1</i> | miR-7111-3p             | 2 |
| <i>circASXL1</i> | miR-7852-3p             | 2 |
| <i>circASXL1</i> | miR-8075                | 2 |
| <i>circASXL1</i> | miR-8084                | 1 |
| <i>circASXL1</i> | miR-940/6808-5p/6893-5p | 4 |
| <i>circASXL1</i> | miR-1233-5p/6778-5p     | 1 |
| <i>circASXL1</i> | miR-1251-3p             | 1 |
| <i>circASXL1</i> | miR-127-5p              | 1 |
| <i>circASXL1</i> | miR-148-3p/152-3p       | 1 |
| <i>circASXL1</i> | miR-1825                | 1 |
| <i>circASXL1</i> | miR-199-5p              | 1 |
| <i>circASXL1</i> | miR-2054                | 1 |
| <i>circASXL1</i> | miR-2113                | 1 |
| <i>circASXL1</i> | miR-302c-3p.2/520-3p    | 1 |
| <i>circASXL1</i> | miR-3156-5p             | 1 |
| <i>circASXL1</i> | miR-320e                | 3 |
| <i>circASXL1</i> | miR-34b-3p              | 1 |
| <i>circASXL1</i> | miR-34c-3p              | 1 |
| <i>circASXL1</i> | miR-3611                | 1 |
| <i>circASXL1</i> | miR-3614-5p             | 1 |
| <i>circASXL1</i> | miR-3672/6864-3p        | 1 |
| <i>circASXL1</i> | miR-3675-3p             | 1 |
| <i>circASXL1</i> | miR-376c-3p             | 1 |
| <i>circASXL1</i> | miR-383-5p.2            | 1 |
| <i>circASXL1</i> | miR-3928-5p/6806-3p     | 1 |
| <i>circASXL1</i> | miR-4432                | 1 |
| <i>circASXL1</i> | miR-4433a-3p            | 1 |
| <i>circASXL1</i> | miR-4433b-3p            | 3 |
| <i>circASXL1</i> | miR-4459                | 1 |
| <i>circASXL1</i> | miR-452-3p              | 1 |
| <i>circASXL1</i> | miR-4648                | 1 |

|                  |                       |   |
|------------------|-----------------------|---|
| <i>circASXL1</i> | miR-4653-3p           | 3 |
| <i>circASXL1</i> | miR-4654/4769-5p      | 1 |
| <i>circASXL1</i> | miR-4696              | 1 |
| <i>circASXL1</i> | miR-4699-5p           | 1 |
| <i>circASXL1</i> | miR-4717-5p           | 3 |
| <i>circASXL1</i> | miR-4733-5p           | 1 |
| <i>circASXL1</i> | miR-4753-3p           | 1 |
| <i>circASXL1</i> | miR-4766-3p           | 1 |
| <i>circASXL1</i> | miR-4768-3p           | 1 |
| <i>circASXL1</i> | miR-4786-5p           | 1 |
| <i>circASXL1</i> | miR-4803              | 3 |
| <i>circASXL1</i> | miR-5008-5p           | 1 |
| <i>circASXL1</i> | miR-5010-3p           | 1 |
| <i>circASXL1</i> | miR-512-3p            | 1 |
| <i>circASXL1</i> | miR-552-5p            | 1 |
| <i>circASXL1</i> | miR-5694              | 1 |
| <i>circASXL1</i> | miR-6077              | 1 |
| <i>circASXL1</i> | miR-6089              | 1 |
| <i>circASXL1</i> | miR-617               | 1 |
| <i>circASXL1</i> | miR-636               | 1 |
| <i>circASXL1</i> | miR-6500-3p           | 1 |
| <i>circASXL1</i> | miR-6502-3p           | 3 |
| <i>circASXL1</i> | miR-6505-3p           | 1 |
| <i>circASXL1</i> | miR-654-5p            | 1 |
| <i>circASXL1</i> | miR-6729-3p           | 1 |
| <i>circASXL1</i> | miR-6769a-5p/6769b-5p | 1 |
| <i>circASXL1</i> | miR-6827-5p           | 1 |
| <i>circASXL1</i> | miR-7-5p              | 1 |
| <i>circASXL1</i> | miR-7114-5p           | 3 |
| <i>circASXL1</i> | miR-7151-5p           | 3 |
| <i>circASXL1</i> | miR-758-3p            | 1 |
| <i>circASXL1</i> | miR-769-5p            | 1 |
| <i>circASXL1</i> | miR-7843-3p           | 1 |
| <i>circASXL1</i> | miR-7977              | 1 |
| <i>circASXL1</i> | miR-8055              | 1 |
| <i>circASXL1</i> | miR-8087              | 1 |
| <i>circASXL1</i> | miR-92a-2-5p          | 1 |
| <i>circASXL1</i> | miR-935               | 1 |



|                  |                     |   |
|------------------|---------------------|---|
| <i>circASXL1</i> | let-7-5p/98-5p      | 2 |
| <i>circASXL1</i> | miR-100-3p          | 4 |
| <i>circASXL1</i> | miR-101-3p.2        | 2 |
| <i>circASXL1</i> | miR-1199-5p/6751-3p | 2 |
| <i>circASXL1</i> | miR-1206            | 5 |
| <i>circASXL1</i> | miR-1225-5p         | 2 |
| <i>circASXL1</i> | miR-1228-3p         | 3 |
| <i>circASXL1</i> | miR-1229-5p         | 2 |
| <i>circASXL1</i> | miR-124-3p.1        | 4 |
| <i>circASXL1</i> | miR-1245a/8079      | 2 |
| <i>circASXL1</i> | miR-1246            | 2 |
| <i>circASXL1</i> | miR-1252-5p         | 2 |
| <i>circASXL1</i> | miR-1253            | 2 |
| <i>circASXL1</i> | miR-1254/3116       | 4 |
| <i>circASXL1</i> | miR-1255b-2-3p      | 2 |
| <i>circASXL1</i> | miR-1276            | 2 |
| <i>circASXL1</i> | miR-1277-5p         | 2 |
| <i>circASXL1</i> | miR-1278            | 2 |
| <i>circASXL1</i> | miR-128-1-5p        | 4 |
| <i>circASXL1</i> | miR-1285-5p         | 2 |
| <i>circASXL1</i> | miR-1324            | 2 |
| <i>circASXL1</i> | miR-134-3p          | 2 |
| <i>circASXL1</i> | miR-139-5p          | 1 |
| <i>circASXL1</i> | miR-143-5p          | 4 |
| <i>circASXL1</i> | miR-150-5p          | 2 |
| <i>circASXL1</i> | miR-151-3p          | 2 |
| <i>circASXL1</i> | miR-1537-5p         | 2 |
| <i>circASXL1</i> | miR-190a-3p         | 2 |
| <i>circASXL1</i> | miR-194-3p          | 4 |
| <i>circASXL1</i> | miR-196a-3p         | 2 |
| <i>circASXL1</i> | miR-20b-3p          | 2 |
| <i>circASXL1</i> | miR-21-5p/590-5p    | 2 |
| <i>circASXL1</i> | miR-2115-3p         | 2 |
| <i>circASXL1</i> | miR-2116-3p         | 2 |
| <i>circASXL1</i> | miR-214-3p/3619-5p  | 3 |
| <i>circASXL1</i> | miR-2278            | 2 |
| <i>circASXL1</i> | miR-2392            | 2 |
| <i>circASXL1</i> | miR-24-3p           | 4 |

|                  |                       |   |
|------------------|-----------------------|---|
| <i>circASXL1</i> | miR-24-5p             | 2 |
| <i>circASXL1</i> | miR-28-3p             | 2 |
| <i>circASXL1</i> | miR-2861              | 4 |
| <i>circASXL1</i> | miR-29b-1-5p          | 4 |
| <i>circASXL1</i> | miR-3074-3p           | 2 |
| <i>circASXL1</i> | miR-3120-3p           | 3 |
| <i>circASXL1</i> | miR-3123              | 2 |
| <i>circASXL1</i> | miR-3125/3916/6859-5p | 2 |
| <i>circASXL1</i> | miR-3137              | 2 |
| <i>circASXL1</i> | miR-3171              | 2 |
| <i>circASXL1</i> | miR-3173-3p/6891-5p   | 2 |
| <i>circASXL1</i> | miR-3179              | 4 |
| <i>circASXL1</i> | miR-3200-3p           | 2 |
| <i>circASXL1</i> | miR-323-3p            | 1 |
| <i>circASXL1</i> | miR-325               | 2 |
| <i>circASXL1</i> | miR-342-3p            | 4 |
| <i>circASXL1</i> | miR-3607-3p           | 2 |
| <i>circASXL1</i> | miR-361-5p            | 2 |
| <i>circASXL1</i> | miR-3622a-3p/3622b-3p | 1 |
| <i>circASXL1</i> | miR-3658              | 6 |
| <i>circASXL1</i> | miR-3663-3p           | 2 |
| <i>circASXL1</i> | miR-3664-5p           | 2 |
| <i>circASXL1</i> | miR-3665              | 4 |
| <i>circASXL1</i> | miR-3677-5p           | 4 |
| <i>circASXL1</i> | miR-3714              | 4 |
| <i>circASXL1</i> | miR-374b-3p           | 2 |
| <i>circASXL1</i> | miR-377-3p            | 4 |
| <i>circASXL1</i> | miR-381-3p            | 4 |
| <i>circASXL1</i> | miR-3910              | 4 |
| <i>circASXL1</i> | miR-3914              | 2 |
| <i>circASXL1</i> | miR-3919              | 2 |
| <i>circASXL1</i> | miR-3924              | 2 |
| <i>circASXL1</i> | miR-3925-5p           | 2 |
| <i>circASXL1</i> | miR-3926              | 2 |
| <i>circASXL1</i> | miR-3928-3p           | 2 |
| <i>circASXL1</i> | miR-3936              | 4 |
| <i>circASXL1</i> | miR-3944-5p           | 4 |
| <i>circASXL1</i> | miR-4265/4296/4322    | 2 |

|                  |                     |   |
|------------------|---------------------|---|
| <i>circASXL1</i> | miR-4272            | 6 |
| <i>circASXL1</i> | miR-4275            | 2 |
| <i>circASXL1</i> | miR-4282            | 4 |
| <i>circASXL1</i> | miR-4284            | 4 |
| <i>circASXL1</i> | miR-4299            | 4 |
| <i>circASXL1</i> | miR-4311            | 2 |
| <i>circASXL1</i> | miR-4318            | 2 |
| <i>circASXL1</i> | miR-432-3p          | 2 |
| <i>circASXL1</i> | miR-4330            | 2 |
| <i>circASXL1</i> | miR-4426/4647/4662b | 6 |
| <i>circASXL1</i> | miR-4428            | 2 |
| <i>circASXL1</i> | miR-4456            | 4 |
| <i>circASXL1</i> | miR-4457            | 2 |
| <i>circASXL1</i> | miR-4477a           | 4 |
| <i>circASXL1</i> | miR-4493            | 2 |
| <i>circASXL1</i> | miR-4494            | 2 |
| <i>circASXL1</i> | miR-4495            | 2 |
| <i>circASXL1</i> | miR-4522            | 2 |
| <i>circASXL1</i> | miR-455-3p.2        | 4 |
| <i>circASXL1</i> | miR-4637            | 2 |
| <i>circASXL1</i> | miR-4662a-3p        | 6 |
| <i>circASXL1</i> | miR-4666a-3p        | 4 |
| <i>circASXL1</i> | miR-4688/6743-5p    | 4 |
| <i>circASXL1</i> | miR-4690-5p         | 3 |
| <i>circASXL1</i> | miR-4693-5p         | 2 |
| <i>circASXL1</i> | miR-4694-5p         | 4 |
| <i>circASXL1</i> | miR-4704-5p         | 1 |
| <i>circASXL1</i> | miR-4714-5p         | 2 |
| <i>circASXL1</i> | miR-4718            | 2 |
| <i>circASXL1</i> | miR-4731-3p/4801    | 2 |
| <i>circASXL1</i> | miR-4753-5p         | 2 |
| <i>circASXL1</i> | miR-4756-3p         | 2 |
| <i>circASXL1</i> | miR-4764-5p         | 2 |
| <i>circASXL1</i> | miR-4795-5p         | 2 |
| <i>circASXL1</i> | miR-4796-3p         | 4 |
| <i>circASXL1</i> | miR-486-5p          | 1 |
| <i>circASXL1</i> | miR-497-3p          | 2 |
| <i>circASXL1</i> | miR-4999-3p         | 1 |

|                  |                     |   |
|------------------|---------------------|---|
| <i>circASXL1</i> | miR-4999-5p         | 2 |
| <i>circASXL1</i> | miR-499b-5p         | 2 |
| <i>circASXL1</i> | miR-5003-5p         | 2 |
| <i>circASXL1</i> | miR-5011-5p         | 8 |
| <i>circASXL1</i> | miR-513c-5p/514b-5p | 2 |
| <i>circASXL1</i> | miR-514a-5p         | 2 |
| <i>circASXL1</i> | miR-520g-5p         | 2 |
| <i>circASXL1</i> | miR-532-3p          | 2 |
| <i>circASXL1</i> | miR-532-5p          | 2 |
| <i>circASXL1</i> | miR-539-3p          | 4 |
| <i>circASXL1</i> | miR-548p            | 4 |
| <i>circASXL1</i> | miR-548q            | 4 |
| <i>circASXL1</i> | miR-555             | 2 |
| <i>circASXL1</i> | miR-5589-3p         | 2 |
| <i>circASXL1</i> | miR-561-5p          | 2 |
| <i>circASXL1</i> | miR-5682            | 2 |
| <i>circASXL1</i> | miR-5691            | 2 |
| <i>circASXL1</i> | miR-5693            | 4 |
| <i>circASXL1</i> | miR-582-3p          | 1 |
| <i>circASXL1</i> | miR-582-5p          | 2 |
| <i>circASXL1</i> | miR-583             | 2 |
| <i>circASXL1</i> | miR-585-5p          | 2 |
| <i>circASXL1</i> | miR-605-3p          | 2 |
| <i>circASXL1</i> | miR-607             | 4 |
| <i>circASXL1</i> | miR-6071            | 2 |
| <i>circASXL1</i> | miR-6074            | 2 |
| <i>circASXL1</i> | miR-6085/6813-5p    | 4 |
| <i>circASXL1</i> | miR-6126            | 8 |
| <i>circASXL1</i> | miR-6165            | 3 |
| <i>circASXL1</i> | miR-622             | 2 |
| <i>circASXL1</i> | miR-628-3p          | 2 |
| <i>circASXL1</i> | miR-642-3p          | 2 |
| <i>circASXL1</i> | miR-6499-3p         | 4 |
| <i>circASXL1</i> | miR-6510-5p         | 3 |
| <i>circASXL1</i> | miR-6512-5p         | 2 |
| <i>circASXL1</i> | miR-656-3p          | 4 |
| <i>circASXL1</i> | miR-657             | 4 |
| <i>circASXL1</i> | miR-661             | 4 |

|                  |                                       |   |
|------------------|---------------------------------------|---|
| <i>circASXL1</i> | miR-6715a-3p                          | 2 |
| <i>circASXL1</i> | miR-6728-3p                           | 2 |
| <i>circASXL1</i> | miR-6735-3p                           | 4 |
| <i>circASXL1</i> | miR-6748-5p                           | 2 |
| <i>circASXL1</i> | miR-6759-5p                           | 2 |
| <i>circASXL1</i> | miR-6762-5p/6845-5p                   | 4 |
| <i>circASXL1</i> | miR-6765-3p                           | 1 |
| <i>circASXL1</i> | miR-6770-5p                           | 2 |
| <i>circASXL1</i> | miR-6792-5p                           | 2 |
| <i>circASXL1</i> | miR-6793-5p                           | 2 |
| <i>circASXL1</i> | miR-6796-5p                           | 2 |
| <i>circASXL1</i> | miR-6813-3p                           | 2 |
| <i>circASXL1</i> | miR-6814-5p                           | 2 |
| <i>circASXL1</i> | miR-6828-3p                           | 2 |
| <i>circASXL1</i> | miR-6830-5p                           | 2 |
| <i>circASXL1</i> | miR-6831-3p                           | 2 |
| <i>circASXL1</i> | miR-6853-3p                           | 5 |
| <i>circASXL1</i> | miR-6864-5p                           | 8 |
| <i>circASXL1</i> | miR-6866-5p                           | 2 |
| <i>circASXL1</i> | miR-7-3p                              | 2 |
| <i>circASXL1</i> | miR-708-3p                            | 2 |
| <i>circASXL1</i> | miR-7515                              | 4 |
| <i>circASXL1</i> | miR-767-3p                            | 2 |
| <i>circASXL1</i> | miR-7978                              | 4 |
| <i>circASXL1</i> | miR-8057                              | 4 |
| <i>circASXL1</i> | miR-8062                              | 2 |
| <i>circASXL1</i> | miR-877-5p                            | 2 |
| <i>circASXL1</i> | miR-885-5p                            | 4 |
| <i>circASXL1</i> | miR-891b                              | 2 |
| <i>circASXL1</i> | miR-892a                              | 2 |
| <i>circASXL1</i> | miR-9-3p                              | 2 |
| <i>circASXL1</i> | miR-922                               | 3 |
| <i>circATE1</i>  | let-7a-2-3p/let-7g-3p                 | 1 |
| <i>circATE1</i>  | let-7a-3p/let-7b-3p/let-7f-1-3p/98-3p | 1 |
| <i>circATE1</i>  | let-7c-3p                             | 1 |
| <i>circATE1</i>  | let-7f-2-3p/1185-3p                   | 1 |
| <i>circATE1</i>  | miR-1-3p/206                          | 1 |
| <i>circATE1</i>  | miR-101-3p.1                          | 1 |

|                 |                     |   |
|-----------------|---------------------|---|
| <i>circATE1</i> | miR-101-3p.2        | 1 |
| <i>circATE1</i> | miR-103-3p/107      | 2 |
| <i>circATE1</i> | miR-105-5p          | 1 |
| <i>circATE1</i> | miR-1178-5p         | 1 |
| <i>circATE1</i> | miR-1180-5p         | 3 |
| <i>circATE1</i> | miR-1182            | 1 |
| <i>circATE1</i> | miR-1193            | 2 |
| <i>circATE1</i> | miR-1200            | 2 |
| <i>circATE1</i> | miR-1207-3p         | 3 |
| <i>circATE1</i> | miR-1207-5p/4763-3p | 1 |
| <i>circATE1</i> | miR-1224-3p         | 3 |
| <i>circATE1</i> | miR-1224-5p         | 2 |
| <i>circATE1</i> | miR-1225-3p         | 1 |
| <i>circATE1</i> | miR-1225-5p         | 1 |
| <i>circATE1</i> | miR-1226-3p         | 3 |
| <i>circATE1</i> | miR-1226-5p         | 4 |
| <i>circATE1</i> | miR-1228-5p         | 1 |
| <i>circATE1</i> | miR-1229-3p         | 1 |
| <i>circATE1</i> | miR-1229-5p         | 1 |
| <i>circATE1</i> | miR-1233-3p         | 1 |
| <i>circATE1</i> | miR-1233-5p/6778-5p | 1 |
| <i>circATE1</i> | miR-1236-5p         | 2 |
| <i>circATE1</i> | miR-1237-3p         | 1 |
| <i>circATE1</i> | miR-124-3p.1        | 2 |
| <i>circATE1</i> | miR-124-3p.2/506-3p | 2 |
| <i>circATE1</i> | miR-124-5p          | 3 |
| <i>circATE1</i> | miR-1243            | 1 |
| <i>circATE1</i> | miR-1245a/8079      | 1 |
| <i>circATE1</i> | miR-1245b-3p        | 1 |
| <i>circATE1</i> | miR-1246            | 2 |
| <i>circATE1</i> | miR-1248            | 1 |
| <i>circATE1</i> | miR-125-5p          | 1 |
| <i>circATE1</i> | miR-1252-3p         | 1 |
| <i>circATE1</i> | miR-1252-5p         | 2 |
| <i>circATE1</i> | miR-1253            | 2 |
| <i>circATE1</i> | miR-1255a/1255b-5p  | 1 |
| <i>circATE1</i> | miR-1255b-2-3p      | 1 |
| <i>circATE1</i> | miR-125a-3p         | 1 |

|                 |                   |   |
|-----------------|-------------------|---|
| <i>circATE1</i> | miR-126-5p        | 2 |
| <i>circATE1</i> | miR-1261          | 1 |
| <i>circATE1</i> | miR-1266-5p/4518  | 1 |
| <i>circATE1</i> | miR-1267          | 1 |
| <i>circATE1</i> | miR-1268a/1268b   | 1 |
| <i>circATE1</i> | miR-127-5p        | 1 |
| <i>circATE1</i> | miR-1270          | 4 |
| <i>circATE1</i> | miR-1272          | 1 |
| <i>circATE1</i> | miR-1273d         | 4 |
| <i>circATE1</i> | miR-1273f         | 1 |
| <i>circATE1</i> | miR-1273g-3p      | 1 |
| <i>circATE1</i> | miR-1273h-3p      | 2 |
| <i>circATE1</i> | miR-1275/4665-5p  | 2 |
| <i>circATE1</i> | miR-1276          | 1 |
| <i>circATE1</i> | miR-1277-5p       | 1 |
| <i>circATE1</i> | miR-1278          | 4 |
| <i>circATE1</i> | miR-128-3p        | 1 |
| <i>circATE1</i> | miR-1284          | 1 |
| <i>circATE1</i> | miR-1285-5p       | 2 |
| <i>circATE1</i> | miR-1287-3p       | 1 |
| <i>circATE1</i> | miR-1287-5p       | 3 |
| <i>circATE1</i> | miR-1289          | 1 |
| <i>circATE1</i> | miR-129-5p        | 3 |
| <i>circATE1</i> | miR-1293/4483     | 1 |
| <i>circATE1</i> | miR-1294          | 3 |
| <i>circATE1</i> | miR-1295b-5p/1912 | 6 |
| <i>circATE1</i> | miR-1298-5p       | 1 |
| <i>circATE1</i> | miR-1299          | 1 |
| <i>circATE1</i> | miR-1301-3p       | 2 |
| <i>circATE1</i> | miR-1303          | 3 |
| <i>circATE1</i> | miR-1304-5p       | 3 |
| <i>circATE1</i> | miR-1305          | 2 |
| <i>circATE1</i> | miR-1306-5p       | 1 |
| <i>circATE1</i> | miR-1322          | 1 |
| <i>circATE1</i> | miR-134-3p        | 4 |
| <i>circATE1</i> | miR-134-5p        | 1 |
| <i>circATE1</i> | miR-135-5p        | 2 |
| <i>circATE1</i> | miR-136-5p        | 2 |

|                 |                                      |   |
|-----------------|--------------------------------------|---|
| <i>circATE1</i> | miR-141-3p/200-3p                    | 1 |
| <i>circATE1</i> | miR-143-3p                           | 1 |
| <i>circATE1</i> | miR-143-5p                           | 1 |
| <i>circATE1</i> | miR-144-3p                           | 1 |
| <i>circATE1</i> | miR-146-5p                           | 3 |
| <i>circATE1</i> | miR-146b-3p                          | 1 |
| <i>circATE1</i> | miR-148a-5p                          | 2 |
| <i>circATE1</i> | miR-149-3p/4728-5p/6785-5p/6883-5p   | 1 |
| <i>circATE1</i> | miR-149-5p                           | 2 |
| <i>circATE1</i> | miR-15-5p/16-5p/195-5p/424-5p/497-5p | 1 |
| <i>circATE1</i> | miR-150-5p                           | 2 |
| <i>circATE1</i> | miR-154-5p                           | 3 |
| <i>circATE1</i> | miR-155-5p                           | 2 |
| <i>circATE1</i> | miR-1587/3620-5p                     | 1 |
| <i>circATE1</i> | miR-15a-3p                           | 1 |
| <i>circATE1</i> | miR-15b-3p                           | 1 |
| <i>circATE1</i> | miR-16-1-3p                          | 1 |
| <i>circATE1</i> | miR-181-5p                           | 3 |
| <i>circATE1</i> | miR-181a-2-3p                        | 1 |
| <i>circATE1</i> | miR-185-5p                           | 1 |
| <i>circATE1</i> | miR-186-3p                           | 2 |
| <i>circATE1</i> | miR-186-5p                           | 5 |
| <i>circATE1</i> | miR-18a-3p                           | 1 |
| <i>circATE1</i> | miR-19-5p                            | 1 |
| <i>circATE1</i> | miR-1909-5p                          | 1 |
| <i>circATE1</i> | miR-1910-3p/6511a-5p                 | 2 |
| <i>circATE1</i> | miR-1910-5p                          | 1 |
| <i>circATE1</i> | miR-1911-3p                          | 3 |
| <i>circATE1</i> | miR-193-3p                           | 2 |
| <i>circATE1</i> | miR-193b-5p                          | 3 |
| <i>circATE1</i> | miR-197-3p                           | 2 |
| <i>circATE1</i> | miR-200ab-5p                         | 1 |
| <i>circATE1</i> | miR-200c-5p/550a-3p                  | 1 |
| <i>circATE1</i> | miR-202-5p                           | 1 |
| <i>circATE1</i> | miR-205-3p                           | 1 |
| <i>circATE1</i> | miR-205-5p                           | 3 |
| <i>circATE1</i> | miR-2052                             | 1 |
| <i>circATE1</i> | miR-21-3p/3591-3p                    | 1 |



|                 |                                     |   |
|-----------------|-------------------------------------|---|
| <i>circATE1</i> | miR-2116-3p                         | 2 |
| <i>circATE1</i> | miR-212-5p                          | 1 |
| <i>circATE1</i> | miR-214-3p/3619-5p                  | 4 |
| <i>circATE1</i> | miR-215-3p                          | 1 |
| <i>circATE1</i> | miR-216a-5p                         | 1 |
| <i>circATE1</i> | miR-216b-5p                         | 1 |
| <i>circATE1</i> | miR-219-5p                          | 2 |
| <i>circATE1</i> | miR-222-5p                          | 2 |
| <i>circATE1</i> | miR-223-3p                          | 1 |
| <i>circATE1</i> | miR-223-5p                          | 2 |
| <i>circATE1</i> | miR-23-3p                           | 1 |
| <i>circATE1</i> | miR-23-5p                           | 1 |
| <i>circATE1</i> | miR-2355-3p                         | 1 |
| <i>circATE1</i> | miR-2392                            | 1 |
| <i>circATE1</i> | miR-24-3p                           | 2 |
| <i>circATE1</i> | miR-2467-3p                         | 2 |
| <i>circATE1</i> | miR-25-3p/32-5p/92-3p/363-3p/367-3p | 1 |
| <i>circATE1</i> | miR-26-5p                           | 3 |
| <i>circATE1</i> | miR-2681-5p                         | 1 |
| <i>circATE1</i> | miR-296-3p                          | 2 |
| <i>circATE1</i> | miR-297                             | 1 |
| <i>circATE1</i> | miR-298                             | 3 |
| <i>circATE1</i> | miR-299-3p                          | 2 |
| <i>circATE1</i> | miR-29a-5p                          | 3 |
| <i>circATE1</i> | miR-30-3p                           | 2 |
| <i>circATE1</i> | miR-30-5p                           | 1 |
| <i>circATE1</i> | miR-302a-5p                         | 1 |
| <i>circATE1</i> | miR-302f                            | 1 |
| <i>circATE1</i> | miR-31-3p                           | 2 |
| <i>circATE1</i> | miR-3115                            | 1 |
| <i>circATE1</i> | miR-3120-5p                         | 1 |
| <i>circATE1</i> | miR-3121-5p                         | 2 |
| <i>circATE1</i> | miR-3123                            | 4 |
| <i>circATE1</i> | miR-3129-3p/5583-5p                 | 2 |
| <i>circATE1</i> | miR-3130-3p                         | 1 |
| <i>circATE1</i> | miR-3130-5p/4482-5p                 | 6 |
| <i>circATE1</i> | miR-3133                            | 5 |
| <i>circATE1</i> | miR-3135b                           | 3 |

|                 |                           |   |
|-----------------|---------------------------|---|
| <i>circATE1</i> | miR-3140-3p               | 1 |
| <i>circATE1</i> | miR-3145-5p               | 2 |
| <i>circATE1</i> | miR-3147                  | 1 |
| <i>circATE1</i> | miR-3148                  | 4 |
| <i>circATE1</i> | miR-3149                  | 1 |
| <i>circATE1</i> | miR-3150a-5p/3150b-5p     | 1 |
| <i>circATE1</i> | miR-3151-5p               | 2 |
| <i>circATE1</i> | miR-3154                  | 2 |
| <i>circATE1</i> | miR-3156-5p               | 2 |
| <i>circATE1</i> | miR-3157-3p               | 2 |
| <i>circATE1</i> | miR-3157-5p               | 2 |
| <i>circATE1</i> | miR-3159                  | 1 |
| <i>circATE1</i> | miR-3161                  | 1 |
| <i>circATE1</i> | miR-3164                  | 1 |
| <i>circATE1</i> | miR-3173-5p               | 1 |
| <i>circATE1</i> | miR-3174                  | 1 |
| <i>circATE1</i> | miR-3175                  | 1 |
| <i>circATE1</i> | miR-3177-5p               | 1 |
| <i>circATE1</i> | miR-3180-5p               | 2 |
| <i>circATE1</i> | miR-3182                  | 2 |
| <i>circATE1</i> | miR-3185                  | 1 |
| <i>circATE1</i> | miR-3187-3p               | 1 |
| <i>circATE1</i> | miR-3189-3p               | 1 |
| <i>circATE1</i> | miR-3190-3p               | 1 |
| <i>circATE1</i> | miR-3192-3p               | 1 |
| <i>circATE1</i> | miR-3194-3p               | 1 |
| <i>circATE1</i> | miR-3198/4309             | 2 |
| <i>circATE1</i> | miR-32-3p                 | 1 |
| <i>circATE1</i> | miR-3201/4791             | 1 |
| <i>circATE1</i> | miR-323a-5p               | 1 |
| <i>circATE1</i> | miR-323b-5p/410-5p/494-5p | 1 |
| <i>circATE1</i> | miR-324-3p/1913           | 1 |
| <i>circATE1</i> | miR-326                   | 1 |
| <i>circATE1</i> | miR-329-5p                | 2 |
| <i>circATE1</i> | miR-33-5p                 | 1 |
| <i>circATE1</i> | miR-330-3p                | 1 |
| <i>circATE1</i> | miR-330-3p.2              | 2 |
| <i>circATE1</i> | miR-337-5p                | 1 |

|                 |                           |   |
|-----------------|---------------------------|---|
| <i>circATE1</i> | miR-338-3p                | 2 |
| <i>circATE1</i> | miR-338-5p                | 1 |
| <i>circATE1</i> | miR-33a-3p                | 1 |
| <i>circATE1</i> | miR-33b-3p/515-3p/519e-3p | 1 |
| <i>circATE1</i> | miR-340-5p                | 1 |
| <i>circATE1</i> | miR-342-3p                | 1 |
| <i>circATE1</i> | miR-342-5p/4664-5p        | 2 |
| <i>circATE1</i> | miR-34b-3p                | 2 |
| <i>circATE1</i> | miR-34b-5p/449c-5p        | 2 |
| <i>circATE1</i> | miR-34c-3p                | 2 |
| <i>circATE1</i> | miR-3607-5p               | 1 |
| <i>circATE1</i> | miR-361-5p                | 2 |
| <i>circATE1</i> | miR-3614-3p               | 1 |
| <i>circATE1</i> | miR-3614-5p               | 2 |
| <i>circATE1</i> | miR-3618                  | 1 |
| <i>circATE1</i> | miR-3621                  | 1 |
| <i>circATE1</i> | miR-3622a-3p/3622b-3p     | 1 |
| <i>circATE1</i> | miR-3622b-5p              | 1 |
| <i>circATE1</i> | miR-363-5p/6745           | 1 |
| <i>circATE1</i> | miR-3646                  | 1 |
| <i>circATE1</i> | miR-365-3p                | 1 |
| <i>circATE1</i> | miR-3654                  | 1 |
| <i>circATE1</i> | miR-3656                  | 1 |
| <i>circATE1</i> | miR-3662                  | 1 |
| <i>circATE1</i> | miR-3664-3p               | 1 |
| <i>circATE1</i> | miR-3664-5p               | 1 |
| <i>circATE1</i> | miR-367-5p                | 1 |
| <i>circATE1</i> | miR-3671                  | 1 |
| <i>circATE1</i> | miR-3672/6864-3p          | 1 |
| <i>circATE1</i> | miR-3677-5p               | 1 |
| <i>circATE1</i> | miR-3678-3p               | 2 |
| <i>circATE1</i> | miR-3680-3p               | 2 |
| <i>circATE1</i> | miR-3681-5p               | 1 |
| <i>circATE1</i> | miR-3682-3p               | 1 |
| <i>circATE1</i> | miR-3682-5p               | 1 |
| <i>circATE1</i> | miR-3684                  | 1 |
| <i>circATE1</i> | miR-3685                  | 1 |
| <i>circATE1</i> | miR-3686                  | 1 |

|                 |                     |   |
|-----------------|---------------------|---|
| <i>circATE1</i> | miR-3689d/6851-5p   | 2 |
| <i>circATE1</i> | miR-3691-3p         | 3 |
| <i>circATE1</i> | miR-3692-3p         | 3 |
| <i>circATE1</i> | miR-3714            | 2 |
| <i>circATE1</i> | miR-371a-3p         | 1 |
| <i>circATE1</i> | miR-371b-3p         | 1 |
| <i>circATE1</i> | miR-374a-3p         | 2 |
| <i>circATE1</i> | miR-375             | 2 |
| <i>circATE1</i> | miR-376-3p          | 1 |
| <i>circATE1</i> | miR-376b-5p/376c-5p | 1 |
| <i>circATE1</i> | miR-377-3p          | 3 |
| <i>circATE1</i> | miR-377-5p/6086     | 2 |
| <i>circATE1</i> | miR-378a-5p         | 2 |
| <i>circATE1</i> | miR-378j/6839-5p    | 1 |
| <i>circATE1</i> | miR-382-3p          | 2 |
| <i>circATE1</i> | miR-382-5p          | 2 |
| <i>circATE1</i> | miR-383-5p.2        | 3 |
| <i>circATE1</i> | miR-384             | 1 |
| <i>circATE1</i> | miR-3908            | 1 |
| <i>circATE1</i> | miR-3909            | 1 |
| <i>circATE1</i> | miR-3910            | 2 |
| <i>circATE1</i> | miR-3913-3p         | 3 |
| <i>circATE1</i> | miR-3914            | 1 |
| <i>circATE1</i> | miR-3915            | 2 |
| <i>circATE1</i> | miR-3919            | 4 |
| <i>circATE1</i> | miR-3920            | 5 |
| <i>circATE1</i> | miR-3925-5p         | 4 |
| <i>circATE1</i> | miR-3928-3p         | 1 |
| <i>circATE1</i> | miR-3934-5p         | 1 |
| <i>circATE1</i> | miR-3936            | 3 |
| <i>circATE1</i> | miR-3940-5p/4507    | 1 |
| <i>circATE1</i> | miR-3941            | 1 |
| <i>circATE1</i> | miR-3942-5p         | 1 |
| <i>circATE1</i> | miR-3974            | 2 |
| <i>circATE1</i> | miR-3978            | 1 |
| <i>circATE1</i> | miR-409-3p          | 2 |
| <i>circATE1</i> | miR-410-3p          | 1 |
| <i>circATE1</i> | miR-411-3p          | 1 |

|                 |                    |   |
|-----------------|--------------------|---|
| <i>circATE1</i> | miR-412-3p/6754-3p | 2 |
| <i>circATE1</i> | miR-4251           | 1 |
| <i>circATE1</i> | miR-4259           | 1 |
| <i>circATE1</i> | miR-4264           | 2 |
| <i>circATE1</i> | miR-4265/4296/4322 | 4 |
| <i>circATE1</i> | miR-4266           | 1 |
| <i>circATE1</i> | miR-4267           | 3 |
| <i>circATE1</i> | miR-4268           | 2 |
| <i>circATE1</i> | miR-4269/6715b-5p  | 1 |
| <i>circATE1</i> | miR-4272           | 1 |
| <i>circATE1</i> | miR-4274           | 3 |
| <i>circATE1</i> | miR-4276           | 1 |
| <i>circATE1</i> | miR-4277           | 3 |
| <i>circATE1</i> | miR-4279           | 1 |
| <i>circATE1</i> | miR-4282           | 1 |
| <i>circATE1</i> | miR-4283           | 2 |
| <i>circATE1</i> | miR-4284           | 2 |
| <i>circATE1</i> | miR-4290           | 1 |
| <i>circATE1</i> | miR-4294           | 1 |
| <i>circATE1</i> | miR-4297/5581-5p   | 3 |
| <i>circATE1</i> | miR-4299           | 1 |
| <i>circATE1</i> | miR-4302           | 1 |
| <i>circATE1</i> | miR-4307           | 1 |
| <i>circATE1</i> | miR-4311           | 1 |
| <i>circATE1</i> | miR-4316           | 3 |
| <i>circATE1</i> | miR-4317           | 2 |
| <i>circATE1</i> | miR-4318           | 2 |
| <i>circATE1</i> | miR-432-3p         | 1 |
| <i>circATE1</i> | miR-432-5p         | 1 |
| <i>circATE1</i> | miR-4320           | 1 |
| <i>circATE1</i> | miR-4324           | 1 |
| <i>circATE1</i> | miR-4325           | 1 |
| <i>circATE1</i> | miR-4326           | 1 |
| <i>circATE1</i> | miR-4329           | 1 |
| <i>circATE1</i> | miR-433-3p         | 2 |
| <i>circATE1</i> | miR-4330           | 1 |
| <i>circATE1</i> | miR-4417           | 1 |
| <i>circATE1</i> | miR-4421/5699-3p   | 2 |

|                 |                     |   |
|-----------------|---------------------|---|
| <i>circATE1</i> | miR-4422            | 2 |
| <i>circATE1</i> | miR-4423-3p         | 1 |
| <i>circATE1</i> | miR-4425            | 1 |
| <i>circATE1</i> | miR-4426/4647/4662b | 1 |
| <i>circATE1</i> | miR-4432            | 1 |
| <i>circATE1</i> | miR-4433a-5p        | 1 |
| <i>circATE1</i> | miR-4433b-5p        | 1 |
| <i>circATE1</i> | miR-4434/4516/5703  | 4 |
| <i>circATE1</i> | miR-4435            | 1 |
| <i>circATE1</i> | miR-4437            | 1 |
| <i>circATE1</i> | miR-4443            | 1 |
| <i>circATE1</i> | miR-4445-5p         | 2 |
| <i>circATE1</i> | miR-4447/4472       | 2 |
| <i>circATE1</i> | miR-4448            | 2 |
| <i>circATE1</i> | miR-4456            | 1 |
| <i>circATE1</i> | miR-4457            | 6 |
| <i>circATE1</i> | miR-4461            | 1 |
| <i>circATE1</i> | miR-4463            | 1 |
| <i>circATE1</i> | miR-4464/4748       | 1 |
| <i>circATE1</i> | miR-4470            | 1 |
| <i>circATE1</i> | miR-4474-3p         | 2 |
| <i>circATE1</i> | miR-4476/6876-5p    | 2 |
| <i>circATE1</i> | miR-4484            | 2 |
| <i>circATE1</i> | miR-4489            | 2 |
| <i>circATE1</i> | miR-4491/4657       | 2 |
| <i>circATE1</i> | miR-4496            | 5 |
| <i>circATE1</i> | miR-4499            | 1 |
| <i>circATE1</i> | miR-4506            | 2 |
| <i>circATE1</i> | miR-4509            | 1 |
| <i>circATE1</i> | miR-450b-5p         | 2 |
| <i>circATE1</i> | miR-451             | 1 |
| <i>circATE1</i> | miR-4511            | 2 |
| <i>circATE1</i> | miR-4513/6855-3p    | 1 |
| <i>circATE1</i> | miR-4514/4692       | 1 |
| <i>circATE1</i> | miR-4517            | 1 |
| <i>circATE1</i> | miR-4519            | 3 |
| <i>circATE1</i> | miR-452-3p          | 3 |
| <i>circATE1</i> | miR-4524a-3p        | 1 |

|                 |                     |   |
|-----------------|---------------------|---|
| <i>circATE1</i> | miR-4529-5p         | 1 |
| <i>circATE1</i> | miR-4530            | 2 |
| <i>circATE1</i> | miR-4531            | 4 |
| <i>circATE1</i> | miR-455-3p.1        | 1 |
| <i>circATE1</i> | miR-455-3p.2        | 1 |
| <i>circATE1</i> | miR-4635            | 2 |
| <i>circATE1</i> | miR-4640-5p         | 2 |
| <i>circATE1</i> | miR-4641            | 1 |
| <i>circATE1</i> | miR-4645-3p         | 1 |
| <i>circATE1</i> | miR-4645-5p/4673    | 3 |
| <i>circATE1</i> | miR-4646-3p         | 1 |
| <i>circATE1</i> | miR-4648            | 1 |
| <i>circATE1</i> | miR-4649-3p         | 1 |
| <i>circATE1</i> | miR-4654/4769-5p    | 1 |
| <i>circATE1</i> | miR-4656            | 2 |
| <i>circATE1</i> | miR-4660            | 1 |
| <i>circATE1</i> | miR-4661-3p         | 2 |
| <i>circATE1</i> | miR-4668-3p         | 3 |
| <i>circATE1</i> | miR-4670-3p         | 2 |
| <i>circATE1</i> | miR-4672            | 1 |
| <i>circATE1</i> | miR-4674            | 1 |
| <i>circATE1</i> | miR-4675/4741       | 2 |
| <i>circATE1</i> | miR-4688/6743-5p    | 2 |
| <i>circATE1</i> | miR-4689/6858-5p    | 2 |
| <i>circATE1</i> | miR-4691-3p         | 3 |
| <i>circATE1</i> | miR-4691-5p/6792-3p | 2 |
| <i>circATE1</i> | miR-4693-3p         | 2 |
| <i>circATE1</i> | miR-4695-3p         | 1 |
| <i>circATE1</i> | miR-4696            | 1 |
| <i>circATE1</i> | miR-4697-3p         | 1 |
| <i>circATE1</i> | miR-4698            | 3 |
| <i>circATE1</i> | miR-4699-5p         | 2 |
| <i>circATE1</i> | miR-4700-3p         | 1 |
| <i>circATE1</i> | miR-4704-3p         | 1 |
| <i>circATE1</i> | miR-4708-5p         | 1 |
| <i>circATE1</i> | miR-4710            | 3 |
| <i>circATE1</i> | miR-4711-5p         | 2 |
| <i>circATE1</i> | miR-4712-3p         | 1 |

|                 |                     |   |
|-----------------|---------------------|---|
| <i>circATE1</i> | miR-4714-5p         | 1 |
| <i>circATE1</i> | miR-4715-5p         | 1 |
| <i>circATE1</i> | miR-4716-5p         | 2 |
| <i>circATE1</i> | miR-4722-3p/6727-3p | 2 |
| <i>circATE1</i> | miR-4728-3p         | 1 |
| <i>circATE1</i> | miR-4731-3p/4801    | 3 |
| <i>circATE1</i> | miR-4732-3p         | 1 |
| <i>circATE1</i> | miR-4733-3p         | 3 |
| <i>circATE1</i> | miR-4736            | 1 |
| <i>circATE1</i> | miR-4742-5p         | 1 |
| <i>circATE1</i> | miR-4744            | 1 |
| <i>circATE1</i> | miR-4747-5p/5196-5p | 1 |
| <i>circATE1</i> | miR-4751            | 1 |
| <i>circATE1</i> | miR-4755-3p         | 2 |
| <i>circATE1</i> | miR-4756-3p         | 4 |
| <i>circATE1</i> | miR-4760-3p         | 1 |
| <i>circATE1</i> | miR-4761-5p         | 2 |
| <i>circATE1</i> | miR-4762-3p         | 1 |
| <i>circATE1</i> | miR-4763-5p         | 2 |
| <i>circATE1</i> | miR-4765            | 2 |
| <i>circATE1</i> | miR-4775            | 2 |
| <i>circATE1</i> | miR-4780            | 1 |
| <i>circATE1</i> | miR-4781-3p         | 2 |
| <i>circATE1</i> | miR-4781-5p         | 1 |
| <i>circATE1</i> | miR-4782-5p/5706    | 1 |
| <i>circATE1</i> | miR-4789-5p         | 1 |
| <i>circATE1</i> | miR-4790-3p         | 1 |
| <i>circATE1</i> | miR-4792            | 3 |
| <i>circATE1</i> | miR-4793-3p         | 1 |
| <i>circATE1</i> | miR-4793-5p         | 2 |
| <i>circATE1</i> | miR-4795-3p         | 2 |
| <i>circATE1</i> | miR-4795-5p         | 1 |
| <i>circATE1</i> | miR-4796-3p         | 1 |
| <i>circATE1</i> | miR-4796-5p         | 1 |
| <i>circATE1</i> | miR-4797-3p         | 2 |
| <i>circATE1</i> | miR-4802-5p         | 1 |
| <i>circATE1</i> | miR-484/3155        | 3 |
| <i>circATE1</i> | miR-487a-5p/487b-5p | 1 |



|                 |                             |   |
|-----------------|-----------------------------|---|
| <i>circATE1</i> | miR-488-5p                  | 3 |
| <i>circATE1</i> | miR-489-3p                  | 3 |
| <i>circATE1</i> | miR-489-5p                  | 1 |
| <i>circATE1</i> | miR-490-3p                  | 1 |
| <i>circATE1</i> | miR-490-5p                  | 1 |
| <i>circATE1</i> | miR-491-5p                  | 2 |
| <i>circATE1</i> | miR-493-3p                  | 1 |
| <i>circATE1</i> | miR-493-5p                  | 1 |
| <i>circATE1</i> | miR-495-3p                  | 1 |
| <i>circATE1</i> | miR-495-5p                  | 2 |
| <i>circATE1</i> | miR-497-3p                  | 1 |
| <i>circATE1</i> | miR-498                     | 1 |
| <i>circATE1</i> | miR-4999-3p                 | 1 |
| <i>circATE1</i> | miR-499a-3p/499b-3p         | 1 |
| <i>circATE1</i> | miR-5000-3p                 | 2 |
| <i>circATE1</i> | miR-5000-5p                 | 5 |
| <i>circATE1</i> | miR-5004-5p                 | 1 |
| <i>circATE1</i> | miR-5008-3p/6737-3p/7157-3p | 1 |
| <i>circATE1</i> | miR-500b-3p                 | 2 |
| <i>circATE1</i> | miR-503-5p                  | 1 |
| <i>circATE1</i> | miR-506-5p                  | 1 |
| <i>circATE1</i> | miR-507/557                 | 2 |
| <i>circATE1</i> | miR-508-3p                  | 2 |
| <i>circATE1</i> | miR-508-5p                  | 2 |
| <i>circATE1</i> | miR-5092                    | 1 |
| <i>circATE1</i> | miR-5093                    | 2 |
| <i>circATE1</i> | miR-5094                    | 1 |
| <i>circATE1</i> | miR-5095/7151-3p            | 1 |
| <i>circATE1</i> | miR-5096                    | 2 |
| <i>circATE1</i> | miR-510-3p                  | 4 |
| <i>circATE1</i> | miR-511-3p                  | 1 |
| <i>circATE1</i> | miR-511-5p                  | 1 |
| <i>circATE1</i> | miR-512-5p                  | 2 |
| <i>circATE1</i> | miR-513a-3p/513c-3p/3606-3p | 1 |
| <i>circATE1</i> | miR-513b-5p                 | 4 |
| <i>circATE1</i> | miR-513c-5p/514b-5p         | 1 |
| <i>circATE1</i> | miR-514a-3p                 | 2 |
| <i>circATE1</i> | miR-514a-5p                 | 1 |

|                 |                                               |   |
|-----------------|-----------------------------------------------|---|
| <i>circATE1</i> | miR-515-5p/519e-5p                            | 1 |
| <i>circATE1</i> | miR-516b-5p                                   | 1 |
| <i>circATE1</i> | miR-5189-3p                                   | 1 |
| <i>circATE1</i> | miR-518c-5p                                   | 1 |
| <i>circATE1</i> | miR-5190                                      | 2 |
| <i>circATE1</i> | miR-5192                                      | 1 |
| <i>circATE1</i> | miR-5196-3p                                   | 2 |
| <i>circATE1</i> | miR-5197-3p                                   | 1 |
| <i>circATE1</i> | miR-519d-5p                                   | 2 |
| <i>circATE1</i> | miR-524-5p                                    | 1 |
| <i>circATE1</i> | miR-532-3p                                    | 2 |
| <i>circATE1</i> | miR-532-5p                                    | 1 |
| <i>circATE1</i> | miR-539-5p                                    | 2 |
| <i>circATE1</i> | miR-544b                                      | 1 |
| <i>circATE1</i> | miR-548an                                     | 2 |
| <i>circATE1</i> | miR-548at-5p                                  | 1 |
| <i>circATE1</i> | miR-548av-3p                                  | 3 |
| <i>circATE1</i> | miR-548az-3p/548ar-3p/548a-3p/548e-3p/548f-3p | 2 |
| <i>circATE1</i> | miR-548b-3p                                   | 2 |
| <i>circATE1</i> | miR-548c-3p                                   | 2 |
| <i>circATE1</i> | miR-548e-5p                                   | 2 |
| <i>circATE1</i> | miR-548m                                      | 2 |
| <i>circATE1</i> | miR-548p                                      | 2 |
| <i>circATE1</i> | miR-548q                                      | 1 |
| <i>circATE1</i> | miR-548s                                      | 1 |
| <i>circATE1</i> | miR-550a-3-5p/550a-5p/1271-3p                 | 1 |
| <i>circATE1</i> | miR-550b-2-5p                                 | 1 |
| <i>circATE1</i> | miR-551b-5p                                   | 2 |
| <i>circATE1</i> | miR-554                                       | 1 |
| <i>circATE1</i> | miR-556-5p                                    | 1 |
| <i>circATE1</i> | miR-5580-3p                                   | 1 |
| <i>circATE1</i> | miR-5581-3p                                   | 3 |
| <i>circATE1</i> | miR-5582-3p                                   | 5 |
| <i>circATE1</i> | miR-5583-3p                                   | 1 |
| <i>circATE1</i> | miR-5586-3p                                   | 2 |
| <i>circATE1</i> | miR-5589-3p                                   | 1 |
| <i>circATE1</i> | miR-5591-3p                                   | 1 |
| <i>circATE1</i> | miR-561-3p                                    | 1 |

|                 |                  |   |
|-----------------|------------------|---|
| <i>circATE1</i> | miR-561-5p       | 2 |
| <i>circATE1</i> | miR-567          | 1 |
| <i>circATE1</i> | miR-5680         | 2 |
| <i>circATE1</i> | miR-5681a        | 2 |
| <i>circATE1</i> | miR-5690         | 1 |
| <i>circATE1</i> | miR-5692a        | 1 |
| <i>circATE1</i> | miR-5694         | 3 |
| <i>circATE1</i> | miR-5695         | 2 |
| <i>circATE1</i> | miR-5697         | 3 |
| <i>circATE1</i> | miR-570-3p       | 3 |
| <i>circATE1</i> | miR-5700         | 4 |
| <i>circATE1</i> | miR-575/4676-5p  | 3 |
| <i>circATE1</i> | miR-580-3p       | 1 |
| <i>circATE1</i> | miR-582-3p       | 2 |
| <i>circATE1</i> | miR-582-5p       | 1 |
| <i>circATE1</i> | miR-583          | 1 |
| <i>circATE1</i> | miR-585-3p       | 1 |
| <i>circATE1</i> | miR-586          | 2 |
| <i>circATE1</i> | miR-587          | 1 |
| <i>circATE1</i> | miR-588          | 1 |
| <i>circATE1</i> | miR-589-3p       | 3 |
| <i>circATE1</i> | miR-589-5p       | 3 |
| <i>circATE1</i> | miR-590-3p       | 2 |
| <i>circATE1</i> | miR-601          | 1 |
| <i>circATE1</i> | miR-605-5p       | 4 |
| <i>circATE1</i> | miR-6069         | 1 |
| <i>circATE1</i> | miR-607          | 3 |
| <i>circATE1</i> | miR-6077         | 1 |
| <i>circATE1</i> | miR-608/4651     | 2 |
| <i>circATE1</i> | miR-6083         | 1 |
| <i>circATE1</i> | miR-6085/6813-5p | 2 |
| <i>circATE1</i> | miR-6124         | 4 |
| <i>circATE1</i> | miR-6126         | 1 |
| <i>circATE1</i> | miR-6134         | 2 |
| <i>circATE1</i> | miR-624-5p       | 1 |
| <i>circATE1</i> | miR-627-3p       | 1 |
| <i>circATE1</i> | miR-627-5p       | 2 |
| <i>circATE1</i> | miR-629-5p       | 3 |

|                 |                     |   |
|-----------------|---------------------|---|
| <i>circATE1</i> | miR-634             | 5 |
| <i>circATE1</i> | miR-642b-5p         | 1 |
| <i>circATE1</i> | miR-645             | 1 |
| <i>circATE1</i> | miR-646             | 1 |
| <i>circATE1</i> | miR-648             | 1 |
| <i>circATE1</i> | miR-649             | 1 |
| <i>circATE1</i> | miR-6499-3p         | 1 |
| <i>circATE1</i> | miR-6500-3p         | 2 |
| <i>circATE1</i> | miR-6502-3p         | 1 |
| <i>circATE1</i> | miR-6508-3p         | 2 |
| <i>circATE1</i> | miR-651-3p          | 7 |
| <i>circATE1</i> | miR-6513-3p         | 1 |
| <i>circATE1</i> | miR-6514-3p         | 2 |
| <i>circATE1</i> | miR-6514-5p         | 1 |
| <i>circATE1</i> | miR-6515-5p         | 1 |
| <i>circATE1</i> | miR-6516-3p         | 1 |
| <i>circATE1</i> | miR-6516-5p         | 3 |
| <i>circATE1</i> | miR-655-5p          | 2 |
| <i>circATE1</i> | miR-660-5p          | 1 |
| <i>circATE1</i> | miR-663b            | 1 |
| <i>circATE1</i> | miR-664a-3p         | 2 |
| <i>circATE1</i> | miR-664a-5p/4794    | 2 |
| <i>circATE1</i> | miR-6715a-3p        | 1 |
| <i>circATE1</i> | miR-6715b-3p        | 1 |
| <i>circATE1</i> | miR-6716-5p         | 1 |
| <i>circATE1</i> | miR-6724-5p/6773-5p | 2 |
| <i>circATE1</i> | miR-6728-3p         | 1 |
| <i>circATE1</i> | miR-6730-5p         | 2 |
| <i>circATE1</i> | miR-6733-3p         | 1 |
| <i>circATE1</i> | miR-6734-5p         | 4 |
| <i>circATE1</i> | miR-6740-5p         | 1 |
| <i>circATE1</i> | miR-6742-5p         | 2 |
| <i>circATE1</i> | miR-6744-5p         | 1 |
| <i>circATE1</i> | miR-6746-3p         | 1 |
| <i>circATE1</i> | miR-6747-3p         | 2 |
| <i>circATE1</i> | miR-6747-5p         | 2 |
| <i>circATE1</i> | miR-6748-3p         | 2 |
| <i>circATE1</i> | miR-6749-3p         | 2 |

|                 |                             |   |
|-----------------|-----------------------------|---|
| <i>circATE1</i> | miR-675-3p                  | 1 |
| <i>circATE1</i> | miR-6750-3p                 | 1 |
| <i>circATE1</i> | miR-6751-5p/6803-5p         | 2 |
| <i>circATE1</i> | miR-6752-5p/6842-5p/7110-5p | 2 |
| <i>circATE1</i> | miR-6753-5p                 | 4 |
| <i>circATE1</i> | miR-6755-3p                 | 1 |
| <i>circATE1</i> | miR-6756-5p/6766-5p         | 1 |
| <i>circATE1</i> | miR-6758-5p/6856-5p         | 2 |
| <i>circATE1</i> | miR-6759-3p                 | 2 |
| <i>circATE1</i> | miR-6759-5p                 | 4 |
| <i>circATE1</i> | miR-676-3p                  | 1 |
| <i>circATE1</i> | miR-6761-5p                 | 1 |
| <i>circATE1</i> | miR-6764-3p/6824-3p         | 1 |
| <i>circATE1</i> | miR-6765-3p                 | 1 |
| <i>circATE1</i> | miR-6768-3p                 | 2 |
| <i>circATE1</i> | miR-6768-5p                 | 1 |
| <i>circATE1</i> | miR-6770-5p                 | 2 |
| <i>circATE1</i> | miR-6773-3p                 | 1 |
| <i>circATE1</i> | miR-6778-3p                 | 2 |
| <i>circATE1</i> | miR-6780b-3p                | 1 |
| <i>circATE1</i> | miR-6782-3p                 | 1 |
| <i>circATE1</i> | miR-6783-5p                 | 1 |
| <i>circATE1</i> | miR-6787-3p                 | 1 |
| <i>circATE1</i> | miR-6791-3p/6829-3p         | 2 |
| <i>circATE1</i> | miR-6794-3p                 | 2 |
| <i>circATE1</i> | miR-6796-5p                 | 4 |
| <i>circATE1</i> | miR-6799-5p                 | 1 |
| <i>circATE1</i> | miR-6801-5p                 | 1 |
| <i>circATE1</i> | miR-6802-3p                 | 3 |
| <i>circATE1</i> | miR-6804-5p                 | 4 |
| <i>circATE1</i> | miR-6807-5p                 | 1 |
| <i>circATE1</i> | miR-6814-5p                 | 1 |
| <i>circATE1</i> | miR-6818-3p                 | 1 |
| <i>circATE1</i> | miR-6819-3p/6877-3p         | 2 |
| <i>circATE1</i> | miR-6822-3p                 | 1 |
| <i>circATE1</i> | miR-6825-5p                 | 1 |
| <i>circATE1</i> | miR-6827-5p                 | 1 |
| <i>circATE1</i> | miR-6829-5p                 | 2 |

|                 |                           |   |
|-----------------|---------------------------|---|
| <i>circATE1</i> | miR-6830-3p               | 4 |
| <i>circATE1</i> | miR-6834-3p               | 1 |
| <i>circATE1</i> | miR-6834-5p               | 4 |
| <i>circATE1</i> | miR-6835-5p               | 2 |
| <i>circATE1</i> | miR-6837-3p               | 2 |
| <i>circATE1</i> | miR-6838-3p               | 1 |
| <i>circATE1</i> | miR-6839-3p               | 1 |
| <i>circATE1</i> | miR-6844                  | 4 |
| <i>circATE1</i> | miR-6849-3p               | 3 |
| <i>circATE1</i> | miR-6857-3p               | 1 |
| <i>circATE1</i> | miR-6858-3p               | 3 |
| <i>circATE1</i> | miR-6864-5p               | 1 |
| <i>circATE1</i> | miR-6865-3p               | 1 |
| <i>circATE1</i> | miR-6869-5p               | 2 |
| <i>circATE1</i> | miR-6879-3p               | 2 |
| <i>circATE1</i> | miR-6882-5p               | 2 |
| <i>circATE1</i> | miR-6885-3p               | 1 |
| <i>circATE1</i> | miR-6888-5p               | 1 |
| <i>circATE1</i> | miR-6889-3p               | 1 |
| <i>circATE1</i> | miR-6890-3p               | 1 |
| <i>circATE1</i> | miR-6894-3p               | 2 |
| <i>circATE1</i> | miR-7-5p                  | 1 |
| <i>circATE1</i> | miR-7106-5p               | 1 |
| <i>circATE1</i> | miR-7108-5p               | 2 |
| <i>circATE1</i> | miR-7109-3p               | 2 |
| <i>circATE1</i> | miR-7109-5p               | 2 |
| <i>circATE1</i> | miR-711                   | 3 |
| <i>circATE1</i> | miR-7112-3p               | 2 |
| <i>circATE1</i> | miR-7114-5p               | 2 |
| <i>circATE1</i> | miR-7154-5p               | 2 |
| <i>circATE1</i> | miR-7156-3p               | 2 |
| <i>circATE1</i> | miR-7158-5p               | 2 |
| <i>circATE1</i> | miR-7162-3p               | 1 |
| <i>circATE1</i> | miR-744-3p                | 1 |
| <i>circATE1</i> | miR-758-3p                | 1 |
| <i>circATE1</i> | miR-759                   | 1 |
| <i>circATE1</i> | miR-760                   | 1 |
| <i>circATE1</i> | miR-762/4492/4498/5001-5p | 2 |

|                 |              |   |
|-----------------|--------------|---|
| <i>circATE1</i> | miR-7641     | 1 |
| <i>circATE1</i> | miR-7703     | 1 |
| <i>circATE1</i> | miR-7843-3p  | 1 |
| <i>circATE1</i> | miR-7844-5p  | 2 |
| <i>circATE1</i> | miR-7849-3p  | 1 |
| <i>circATE1</i> | miR-7854-3p  | 2 |
| <i>circATE1</i> | miR-7855-5p  | 2 |
| <i>circATE1</i> | miR-7976     | 1 |
| <i>circATE1</i> | miR-7978     | 1 |
| <i>circATE1</i> | miR-8055     | 5 |
| <i>circATE1</i> | miR-8057     | 2 |
| <i>circATE1</i> | miR-8060     | 1 |
| <i>circATE1</i> | miR-8062     | 1 |
| <i>circATE1</i> | miR-8063     | 3 |
| <i>circATE1</i> | miR-8065     | 1 |
| <i>circATE1</i> | miR-8066     | 1 |
| <i>circATE1</i> | miR-8069     | 1 |
| <i>circATE1</i> | miR-8070     | 1 |
| <i>circATE1</i> | miR-8074     | 2 |
| <i>circATE1</i> | miR-8075     | 2 |
| <i>circATE1</i> | miR-8076     | 1 |
| <i>circATE1</i> | miR-8081     | 4 |
| <i>circATE1</i> | miR-8086     | 1 |
| <i>circATE1</i> | miR-8087     | 1 |
| <i>circATE1</i> | miR-873-3p   | 2 |
| <i>circATE1</i> | miR-873-5p.1 | 1 |
| <i>circATE1</i> | miR-874-3p   | 2 |
| <i>circATE1</i> | miR-875-3p   | 2 |
| <i>circATE1</i> | miR-876-3p   | 1 |
| <i>circATE1</i> | miR-877-3p   | 1 |
| <i>circATE1</i> | miR-885-3p   | 1 |
| <i>circATE1</i> | miR-889-5p   | 2 |
| <i>circATE1</i> | miR-892-5p   | 1 |
| <i>circATE1</i> | miR-892a     | 2 |
| <i>circATE1</i> | miR-892b     | 1 |
| <i>circATE1</i> | miR-9-5p     | 1 |
| <i>circATE1</i> | miR-922      | 4 |
| <i>circATE1</i> | miR-924      | 3 |

|                   |                          |   |
|-------------------|--------------------------|---|
| <i>circATE1</i>   | miR-934                  | 1 |
| <i>circATE1</i>   | miR-937-5p               | 2 |
| <i>circATE1</i>   | miR-939-5p/1343-5p       | 1 |
| <i>circATE1</i>   | miR-940/6808-5p/6893-5p  | 2 |
| <i>circATE1</i>   | miR-95-5p                | 1 |
| <i>circATE1</i>   | miR-6792-5p              | 1 |
| <i>circATE1</i>   | miR-6866-5p              | 1 |
| <i>circATE1</i>   | miR-877-5p               | 1 |
| <i>circATE1</i>   | miR-122-5p               | 1 |
| <i>circATE1</i>   | miR-4682                 | 1 |
| <i>circATE1</i>   | miR-1238-5p/4758-5p      | 1 |
| <i>circATE1</i>   | miR-4658/6790-5p         | 1 |
| <i>circATRNL1</i> | let-7a-2-3p/let-7g-3p    | 6 |
| <i>circATRNL1</i> | let-7c-3p                | 6 |
| <i>circATRNL1</i> | let-7d-3p                | 1 |
| <i>circATRNL1</i> | let-7e-3p                | 1 |
| <i>circATRNL1</i> | miR-100-3p               | 4 |
| <i>circATRNL1</i> | miR-101-3p.1             | 6 |
| <i>circATRNL1</i> | miR-101-3p.2             | 2 |
| <i>circATRNL1</i> | miR-103-3p/107           | 1 |
| <i>circATRNL1</i> | miR-103b                 | 3 |
| <i>circATRNL1</i> | miR-1193                 | 1 |
| <i>circATRNL1</i> | miR-1197                 | 2 |
| <i>circATRNL1</i> | miR-1225-3p              | 1 |
| <i>circATRNL1</i> | miR-124-5p               | 4 |
| <i>circATRNL1</i> | miR-1245b-3p             | 2 |
| <i>circATRNL1</i> | miR-1252-3p              | 1 |
| <i>circATRNL1</i> | miR-1255b-2-3p           | 2 |
| <i>circATRNL1</i> | miR-1258                 | 1 |
| <i>circATRNL1</i> | miR-1261                 | 3 |
| <i>circATRNL1</i> | miR-1269                 | 3 |
| <i>circATRNL1</i> | miR-1273h-3p             | 8 |
| <i>circATRNL1</i> | miR-1277-5p              | 2 |
| <i>circATRNL1</i> | miR-128-3p               | 3 |
| <i>circATRNL1</i> | miR-1288-3p              | 3 |
| <i>circATRNL1</i> | miR-1298-3p              | 2 |
| <i>circATRNL1</i> | miR-1299                 | 3 |
| <i>circATRNL1</i> | miR-130-3p/301-3p/454-3p | 1 |



|                   |                                     |    |
|-------------------|-------------------------------------|----|
| <i>circATRNL1</i> | miR-132-3p/212-3p                   | 5  |
| <i>circATRNL1</i> | miR-1324                            | 3  |
| <i>circATRNL1</i> | miR-135b-3p                         | 1  |
| <i>circATRNL1</i> | miR-136-5p                          | 18 |
| <i>circATRNL1</i> | miR-141-3p/200-3p                   | 2  |
| <i>circATRNL1</i> | miR-142-5p                          | 10 |
| <i>circATRNL1</i> | miR-144-3p                          | 6  |
| <i>circATRNL1</i> | miR-145-5p                          | 4  |
| <i>circATRNL1</i> | miR-1468-3p                         | 1  |
| <i>circATRNL1</i> | miR-148-3p/152-3p                   | 1  |
| <i>circATRNL1</i> | miR-153-3p                          | 3  |
| <i>circATRNL1</i> | miR-154-3p/487-3p                   | 2  |
| <i>circATRNL1</i> | miR-15a-3p                          | 3  |
| <i>circATRNL1</i> | miR-16-1-3p                         | 2  |
| <i>circATRNL1</i> | miR-16-2-3p/195-3p                  | 2  |
| <i>circATRNL1</i> | miR-18-5p                           | 2  |
| <i>circATRNL1</i> | miR-181-5p                          | 7  |
| <i>circATRNL1</i> | miR-192-3p                          | 1  |
| <i>circATRNL1</i> | miR-194-5p                          | 3  |
| <i>circATRNL1</i> | miR-200ab-5p                        | 2  |
| <i>circATRNL1</i> | miR-205-3p                          | 3  |
| <i>circATRNL1</i> | miR-205-5p                          | 3  |
| <i>circATRNL1</i> | miR-2053                            | 7  |
| <i>circATRNL1</i> | miR-20a-3p                          | 3  |
| <i>circATRNL1</i> | miR-20b-3p                          | 3  |
| <i>circATRNL1</i> | miR-210-5p                          | 1  |
| <i>circATRNL1</i> | miR-216a-5p                         | 1  |
| <i>circATRNL1</i> | miR-216b-5p                         | 1  |
| <i>circATRNL1</i> | miR-217                             | 5  |
| <i>circATRNL1</i> | miR-219a-2-3p                       | 2  |
| <i>circATRNL1</i> | miR-219b-3p                         | 2  |
| <i>circATRNL1</i> | miR-221-3p/222-3p                   | 1  |
| <i>circATRNL1</i> | miR-2278                            | 2  |
| <i>circATRNL1</i> | miR-23-3p                           | 3  |
| <i>circATRNL1</i> | miR-25-3p/32-5p/92-3p/363-3p/367-3p | 6  |
| <i>circATRNL1</i> | miR-27-3p                           | 7  |
| <i>circATRNL1</i> | miR-29a-5p                          | 3  |
| <i>circATRNL1</i> | miR-30-3p                           | 2  |

|                   |                     |   |
|-------------------|---------------------|---|
| <i>circATRNL1</i> | miR-302c-5p         | 1 |
| <i>circATRNL1</i> | miR-302f            | 1 |
| <i>circATRNL1</i> | miR-3064-3p         | 8 |
| <i>circATRNL1</i> | miR-3074-3p         | 2 |
| <i>circATRNL1</i> | miR-3117-3p         | 2 |
| <i>circATRNL1</i> | miR-3117-5p         | 3 |
| <i>circATRNL1</i> | miR-3119            | 2 |
| <i>circATRNL1</i> | miR-3126-3p         | 2 |
| <i>circATRNL1</i> | miR-3127-3p/6756-3p | 2 |
| <i>circATRNL1</i> | miR-3127-5p         | 1 |
| <i>circATRNL1</i> | miR-3137            | 3 |
| <i>circATRNL1</i> | miR-3145-3p         | 2 |
| <i>circATRNL1</i> | miR-3166            | 1 |
| <i>circATRNL1</i> | miR-3171            | 2 |
| <i>circATRNL1</i> | miR-3180-5p         | 2 |
| <i>circATRNL1</i> | miR-3191-5p         | 4 |
| <i>circATRNL1</i> | miR-3199/8052       | 1 |
| <i>circATRNL1</i> | miR-32-3p           | 6 |
| <i>circATRNL1</i> | miR-3201/4791       | 3 |
| <i>circATRNL1</i> | miR-326             | 2 |
| <i>circATRNL1</i> | miR-33-5p           | 4 |
| <i>circATRNL1</i> | miR-338-5p          | 3 |
| <i>circATRNL1</i> | miR-33a-3p          | 2 |
| <i>circATRNL1</i> | miR-34b-3p          | 1 |
| <i>circATRNL1</i> | miR-34c-3p          | 1 |
| <i>circATRNL1</i> | miR-3613-5p         | 2 |
| <i>circATRNL1</i> | miR-3614-3p         | 2 |
| <i>circATRNL1</i> | miR-3622a-5p        | 1 |
| <i>circATRNL1</i> | miR-3646            | 1 |
| <i>circATRNL1</i> | miR-3651            | 2 |
| <i>circATRNL1</i> | miR-365a-5p/365b-5p | 1 |
| <i>circATRNL1</i> | miR-3662            | 3 |
| <i>circATRNL1</i> | miR-3667-3p         | 1 |
| <i>circATRNL1</i> | miR-3668            | 1 |
| <i>circATRNL1</i> | miR-3674            | 1 |
| <i>circATRNL1</i> | miR-3678-3p         | 8 |
| <i>circATRNL1</i> | miR-3686            | 3 |
| <i>circATRNL1</i> | miR-369-3p          | 8 |

|                   |                       |   |
|-------------------|-----------------------|---|
| <i>circATRNL1</i> | miR-3691-3p           | 3 |
| <i>circATRNL1</i> | miR-374-5p            | 2 |
| <i>circATRNL1</i> | miR-374a-3p           | 1 |
| <i>circATRNL1</i> | miR-376a-2-5p         | 1 |
| <i>circATRNL1</i> | miR-376a-5p           | 1 |
| <i>circATRNL1</i> | miR-376b-5p/376c-5p   | 3 |
| <i>circATRNL1</i> | miR-378-3p            | 3 |
| <i>circATRNL1</i> | miR-380-3p            | 1 |
| <i>circATRNL1</i> | miR-382-3p            | 8 |
| <i>circATRNL1</i> | miR-3908              | 2 |
| <i>circATRNL1</i> | miR-3919              | 2 |
| <i>circATRNL1</i> | miR-3920              | 1 |
| <i>circATRNL1</i> | miR-3923              | 2 |
| <i>circATRNL1</i> | miR-3925-3p           | 1 |
| <i>circATRNL1</i> | miR-3942-5p           | 2 |
| <i>circATRNL1</i> | miR-409-3p            | 1 |
| <i>circATRNL1</i> | miR-409-5p            | 1 |
| <i>circATRNL1</i> | miR-412-3p/6754-3p    | 2 |
| <i>circATRNL1</i> | miR-4267              | 1 |
| <i>circATRNL1</i> | miR-4269/6715b-5p     | 1 |
| <i>circATRNL1</i> | miR-4270/4441/6754-5p | 1 |
| <i>circATRNL1</i> | miR-4272              | 4 |
| <i>circATRNL1</i> | miR-4282              | 1 |
| <i>circATRNL1</i> | miR-4297/5581-5p      | 1 |
| <i>circATRNL1</i> | miR-4299              | 1 |
| <i>circATRNL1</i> | miR-4310/7157-5p      | 6 |
| <i>circATRNL1</i> | miR-4317              | 8 |
| <i>circATRNL1</i> | miR-432-5p            | 1 |
| <i>circATRNL1</i> | miR-4328              | 3 |
| <i>circATRNL1</i> | miR-4456              | 1 |
| <i>circATRNL1</i> | miR-4457              | 3 |
| <i>circATRNL1</i> | miR-4477a             | 3 |
| <i>circATRNL1</i> | miR-448               | 3 |
| <i>circATRNL1</i> | miR-4480              | 2 |
| <i>circATRNL1</i> | miR-4495              | 1 |
| <i>circATRNL1</i> | miR-451               | 1 |
| <i>circATRNL1</i> | miR-4514/4692         | 1 |
| <i>circATRNL1</i> | miR-4515              | 3 |

|                   |                     |   |
|-------------------|---------------------|---|
| <i>circATRNL1</i> | miR-4524a-3p        | 2 |
| <i>circATRNL1</i> | miR-4529-5p         | 3 |
| <i>circATRNL1</i> | miR-4638-3p         | 3 |
| <i>circATRNL1</i> | miR-4640-5p         | 1 |
| <i>circATRNL1</i> | miR-4643            | 4 |
| <i>circATRNL1</i> | miR-4652-3p         | 3 |
| <i>circATRNL1</i> | miR-4662-5p         | 1 |
| <i>circATRNL1</i> | miR-4698            | 2 |
| <i>circATRNL1</i> | miR-4703-3p         | 2 |
| <i>circATRNL1</i> | miR-4704-3p         | 1 |
| <i>circATRNL1</i> | miR-4704-5p         | 3 |
| <i>circATRNL1</i> | miR-4711-5p         | 1 |
| <i>circATRNL1</i> | miR-4729            | 1 |
| <i>circATRNL1</i> | miR-4733-5p         | 2 |
| <i>circATRNL1</i> | miR-4740-5p         | 3 |
| <i>circATRNL1</i> | miR-4742-5p         | 1 |
| <i>circATRNL1</i> | miR-4743-3p         | 3 |
| <i>circATRNL1</i> | miR-4749-3p         | 1 |
| <i>circATRNL1</i> | miR-4756-3p         | 2 |
| <i>circATRNL1</i> | miR-4760-5p/8061    | 1 |
| <i>circATRNL1</i> | miR-4766-3p         | 2 |
| <i>circATRNL1</i> | miR-4768-5p/6833-3p | 2 |
| <i>circATRNL1</i> | miR-4771            | 1 |
| <i>circATRNL1</i> | miR-4775            | 2 |
| <i>circATRNL1</i> | miR-4776-3p         | 8 |
| <i>circATRNL1</i> | miR-4778-5p         | 5 |
| <i>circATRNL1</i> | miR-4781-3p         | 1 |
| <i>circATRNL1</i> | miR-4782-5p/5706    | 3 |
| <i>circATRNL1</i> | miR-4789-3p         | 4 |
| <i>circATRNL1</i> | miR-4797-5p         | 1 |
| <i>circATRNL1</i> | miR-4803            | 3 |
| <i>circATRNL1</i> | miR-487a-5p/487b-5p | 1 |
| <i>circATRNL1</i> | miR-488-5p          | 4 |
| <i>circATRNL1</i> | miR-493-5p          | 6 |
| <i>circATRNL1</i> | miR-497-3p          | 2 |
| <i>circATRNL1</i> | miR-498             | 2 |
| <i>circATRNL1</i> | miR-5002-3p         | 1 |
| <i>circATRNL1</i> | miR-5002-5p         | 5 |

|                   |                                      |   |
|-------------------|--------------------------------------|---|
| <i>circATRNL1</i> | miR-5004-3p                          | 3 |
| <i>circATRNL1</i> | miR-5009-5p/8058                     | 3 |
| <i>circATRNL1</i> | miR-5011-5p                          | 8 |
| <i>circATRNL1</i> | miR-5088-3p                          | 1 |
| <i>circATRNL1</i> | miR-509-3-5p/509-5p/4418             | 5 |
| <i>circATRNL1</i> | miR-510-3p                           | 2 |
| <i>circATRNL1</i> | miR-513a-5p                          | 7 |
| <i>circATRNL1</i> | miR-513b-5p                          | 4 |
| <i>circATRNL1</i> | miR-515-5p/519e-5p                   | 4 |
| <i>circATRNL1</i> | miR-516b-5p                          | 3 |
| <i>circATRNL1</i> | miR-5189-3p                          | 1 |
| <i>circATRNL1</i> | miR-518c-5p                          | 2 |
| <i>circATRNL1</i> | miR-5191                             | 2 |
| <i>circATRNL1</i> | miR-545-5p                           | 4 |
| <i>circATRNL1</i> | miR-548aj-5p/548f-5p/548g-5p/548x-5p | 1 |
| <i>circATRNL1</i> | miR-548c-3p                          | 3 |
| <i>circATRNL1</i> | miR-548m                             | 1 |
| <i>circATRNL1</i> | miR-548p                             | 1 |
| <i>circATRNL1</i> | miR-548q                             | 1 |
| <i>circATRNL1</i> | miR-548v                             | 1 |
| <i>circATRNL1</i> | miR-556-5p                           | 2 |
| <i>circATRNL1</i> | miR-5571-5p                          | 6 |
| <i>circATRNL1</i> | miR-5580-3p                          | 1 |
| <i>circATRNL1</i> | miR-5582-5p                          | 1 |
| <i>circATRNL1</i> | miR-5585-3p                          | 1 |
| <i>circATRNL1</i> | miR-561-5p                           | 2 |
| <i>circATRNL1</i> | miR-569                              | 3 |
| <i>circATRNL1</i> | miR-5690                             | 2 |
| <i>circATRNL1</i> | miR-5692a                            | 2 |
| <i>circATRNL1</i> | miR-5692bc                           | 8 |
| <i>circATRNL1</i> | miR-5697                             | 1 |
| <i>circATRNL1</i> | miR-575/4676-5p                      | 1 |
| <i>circATRNL1</i> | miR-576-3p                           | 6 |
| <i>circATRNL1</i> | miR-580-5p                           | 1 |
| <i>circATRNL1</i> | miR-582-5p                           | 2 |
| <i>circATRNL1</i> | miR-587                              | 3 |
| <i>circATRNL1</i> | miR-590-3p                           | 5 |
| <i>circATRNL1</i> | miR-6083                             | 1 |

|                   |                     |   |
|-------------------|---------------------|---|
| <i>circATRNL1</i> | miR-628-5p          | 9 |
| <i>circATRNL1</i> | miR-629-3p          | 2 |
| <i>circATRNL1</i> | miR-640             | 2 |
| <i>circATRNL1</i> | miR-642-3p          | 1 |
| <i>circATRNL1</i> | miR-6501-3p         | 1 |
| <i>circATRNL1</i> | miR-6503-3p         | 2 |
| <i>circATRNL1</i> | miR-6507-5p         | 2 |
| <i>circATRNL1</i> | miR-6508-3p         | 1 |
| <i>circATRNL1</i> | miR-651-3p          | 2 |
| <i>circATRNL1</i> | miR-651-5p          | 3 |
| <i>circATRNL1</i> | miR-6516-5p         | 5 |
| <i>circATRNL1</i> | miR-653-5p          | 3 |
| <i>circATRNL1</i> | miR-665             | 3 |
| <i>circATRNL1</i> | miR-6715a-3p        | 2 |
| <i>circATRNL1</i> | miR-6715b-3p        | 1 |
| <i>circATRNL1</i> | miR-6724-5p/6773-5p | 1 |
| <i>circATRNL1</i> | miR-6734-3p         | 1 |
| <i>circATRNL1</i> | miR-6757-3p         | 6 |
| <i>circATRNL1</i> | miR-6764-3p/6824-3p | 2 |
| <i>circATRNL1</i> | miR-6776-3p         | 1 |
| <i>circATRNL1</i> | miR-6802-3p         | 3 |
| <i>circATRNL1</i> | miR-6807-5p         | 1 |
| <i>circATRNL1</i> | miR-6809-3p         | 2 |
| <i>circATRNL1</i> | miR-6830-5p         | 5 |
| <i>circATRNL1</i> | miR-6837-3p         | 2 |
| <i>circATRNL1</i> | miR-6858-3p         | 1 |
| <i>circATRNL1</i> | miR-6865-3p         | 1 |
| <i>circATRNL1</i> | miR-6884-3p         | 5 |
| <i>circATRNL1</i> | miR-6890-3p         | 4 |
| <i>circATRNL1</i> | miR-7112-3p         | 1 |
| <i>circATRNL1</i> | miR-7641            | 2 |
| <i>circATRNL1</i> | miR-766-3p          | 1 |
| <i>circATRNL1</i> | miR-7845-5p         | 1 |
| <i>circATRNL1</i> | miR-7850-5p         | 4 |
| <i>circATRNL1</i> | miR-7852-3p         | 1 |
| <i>circATRNL1</i> | miR-7855-5p         | 2 |
| <i>circATRNL1</i> | miR-7977            | 2 |
| <i>circATRNL1</i> | miR-7978            | 1 |

|                   |               |   |
|-------------------|---------------|---|
| <i>circATRNL1</i> | miR-802       | 4 |
| <i>circATRNL1</i> | miR-8063      | 2 |
| <i>circATRNL1</i> | miR-8065      | 5 |
| <i>circATRNL1</i> | miR-8075      | 1 |
| <i>circATRNL1</i> | miR-889-3p    | 5 |
| <i>circATRNL1</i> | miR-890       | 1 |
| <i>circATRNL1</i> | miR-935       | 1 |
| <i>circATRNL1</i> | miR-942-5p    | 2 |
| <i>circATRNL1</i> | miR-1-5p      | 5 |
| <i>circATRNL1</i> | miR-1183      | 2 |
| <i>circATRNL1</i> | miR-1200      | 1 |
| <i>circATRNL1</i> | miR-1247-3p   | 2 |
| <i>circATRNL1</i> | miR-1252-5p   | 2 |
| <i>circATRNL1</i> | miR-127-5p    | 3 |
| <i>circATRNL1</i> | miR-1270      | 1 |
| <i>circATRNL1</i> | miR-1273d     | 6 |
| <i>circATRNL1</i> | miR-1273e     | 6 |
| <i>circATRNL1</i> | miR-1282      | 2 |
| <i>circATRNL1</i> | miR-129-5p    | 5 |
| <i>circATRNL1</i> | miR-1292-5p   | 2 |
| <i>circATRNL1</i> | miR-1305      | 5 |
| <i>circATRNL1</i> | miR-137       | 4 |
| <i>circATRNL1</i> | miR-139-5p    | 2 |
| <i>circATRNL1</i> | miR-140-3p.1  | 5 |
| <i>circATRNL1</i> | miR-145-3p    | 9 |
| <i>circATRNL1</i> | miR-146a-3p   | 4 |
| <i>circATRNL1</i> | miR-1470      | 5 |
| <i>circATRNL1</i> | miR-153-5p    | 5 |
| <i>circATRNL1</i> | miR-155-3p    | 1 |
| <i>circATRNL1</i> | miR-181a-2-3p | 2 |
| <i>circATRNL1</i> | miR-182-5p    | 5 |
| <i>circATRNL1</i> | miR-185-5p    | 1 |
| <i>circATRNL1</i> | miR-186-5p    | 6 |
| <i>circATRNL1</i> | miR-190-5p    | 6 |
| <i>circATRNL1</i> | miR-190a-3p   | 2 |
| <i>circATRNL1</i> | miR-1915-5p   | 2 |
| <i>circATRNL1</i> | miR-193b-5p   | 2 |
| <i>circATRNL1</i> | miR-199-3p    | 6 |

|                   |                  |    |
|-------------------|------------------|----|
| <i>circATRNL1</i> | miR-202-5p       | 1  |
| <i>circATRNL1</i> | miR-2054         | 4  |
| <i>circATRNL1</i> | miR-208-3p       | 3  |
| <i>circATRNL1</i> | miR-218-5p       | 4  |
| <i>circATRNL1</i> | miR-222-5p       | 2  |
| <i>circATRNL1</i> | miR-2681-3p      | 4  |
| <i>circATRNL1</i> | miR-296-3p       | 2  |
| <i>circATRNL1</i> | miR-297          | 9  |
| <i>circATRNL1</i> | miR-298          | 8  |
| <i>circATRNL1</i> | miR-299-5p       | 2  |
| <i>circATRNL1</i> | miR-3074-5p      | 9  |
| <i>circATRNL1</i> | miR-3120-3p      | 4  |
| <i>circATRNL1</i> | miR-3126-5p      | 2  |
| <i>circATRNL1</i> | miR-3133         | 6  |
| <i>circATRNL1</i> | miR-3134         | 1  |
| <i>circATRNL1</i> | miR-3136-5p/4439 | 4  |
| <i>circATRNL1</i> | miR-3145-5p      | 10 |
| <i>circATRNL1</i> | miR-3149         | 7  |
| <i>circATRNL1</i> | miR-3154         | 2  |
| <i>circATRNL1</i> | miR-3160-5p      | 2  |
| <i>circATRNL1</i> | miR-3169         | 3  |
| <i>circATRNL1</i> | miR-3179         | 2  |
| <i>circATRNL1</i> | miR-3198/4309    | 1  |
| <i>circATRNL1</i> | miR-3200-3p      | 2  |
| <i>circATRNL1</i> | miR-330-3p.2     | 1  |
| <i>circATRNL1</i> | miR-335-5p       | 1  |
| <i>circATRNL1</i> | miR-340-5p       | 2  |
| <i>circATRNL1</i> | miR-345-5p       | 4  |
| <i>circATRNL1</i> | miR-3529-3p      | 6  |
| <i>circATRNL1</i> | miR-3607-3p      | 3  |
| <i>circATRNL1</i> | miR-3611         | 2  |
| <i>circATRNL1</i> | miR-3619-3p      | 3  |
| <i>circATRNL1</i> | miR-3657         | 2  |
| <i>circATRNL1</i> | miR-3659         | 2  |
| <i>circATRNL1</i> | miR-3675-3p      | 7  |
| <i>circATRNL1</i> | miR-3685         | 1  |
| <i>circATRNL1</i> | miR-3692-5p      | 5  |
| <i>circATRNL1</i> | miR-375          | 7  |



|                   |                                    |    |
|-------------------|------------------------------------|----|
| <i>circATRNL1</i> | miR-378a-5p                        | 1  |
| <i>circATRNL1</i> | miR-384                            | 1  |
| <i>circATRNL1</i> | miR-3912-5p                        | 11 |
| <i>circATRNL1</i> | miR-3924                           | 4  |
| <i>circATRNL1</i> | miR-3940-3p                        | 2  |
| <i>circATRNL1</i> | miR-410-3p                         | 2  |
| <i>circATRNL1</i> | miR-411-3p                         | 4  |
| <i>circATRNL1</i> | miR-411-5p.1                       | 2  |
| <i>circATRNL1</i> | miR-4263                           | 2  |
| <i>circATRNL1</i> | miR-4264                           | 2  |
| <i>circATRNL1</i> | miR-4266                           | 5  |
| <i>circATRNL1</i> | miR-4281                           | 2  |
| <i>circATRNL1</i> | miR-4307                           | 4  |
| <i>circATRNL1</i> | miR-4326                           | 2  |
| <i>circATRNL1</i> | miR-433-3p                         | 4  |
| <i>circATRNL1</i> | miR-4419a/4510/6127/6129/6130/6133 | 2  |
| <i>circATRNL1</i> | miR-4422                           | 1  |
| <i>circATRNL1</i> | miR-4426/4647/4662b                | 5  |
| <i>circATRNL1</i> | miR-4427                           | 5  |
| <i>circATRNL1</i> | miR-4432                           | 2  |
| <i>circATRNL1</i> | miR-4433b-3p                       | 5  |
| <i>circATRNL1</i> | miR-4433b-5p                       | 4  |
| <i>circATRNL1</i> | miR-4446-5p                        | 2  |
| <i>circATRNL1</i> | miR-4471/8059                      | 2  |
| <i>circATRNL1</i> | miR-4501                           | 2  |
| <i>circATRNL1</i> | miR-4504                           | 4  |
| <i>circATRNL1</i> | miR-4511                           | 10 |
| <i>circATRNL1</i> | miR-4513/6855-3p                   | 6  |
| <i>circATRNL1</i> | miR-4517                           | 5  |
| <i>circATRNL1</i> | miR-452-3p                         | 5  |
| <i>circATRNL1</i> | miR-4531                           | 1  |
| <i>circATRNL1</i> | miR-4534/8082                      | 1  |
| <i>circATRNL1</i> | miR-455-5p                         | 4  |
| <i>circATRNL1</i> | miR-4653-3p                        | 5  |
| <i>circATRNL1</i> | miR-4659a-5p/4659b-5p              | 6  |
| <i>circATRNL1</i> | miR-4667-3p                        | 5  |
| <i>circATRNL1</i> | miR-4669                           | 2  |
| <i>circATRNL1</i> | miR-4677-3p                        | 4  |

|                   |                             |    |
|-------------------|-----------------------------|----|
| <i>circATRNL1</i> | miR-4679                    | 4  |
| <i>circATRNL1</i> | miR-4680-3p                 | 5  |
| <i>circATRNL1</i> | miR-4684-5p                 | 6  |
| <i>circATRNL1</i> | miR-4693-3p                 | 1  |
| <i>circATRNL1</i> | miR-4696                    | 2  |
| <i>circATRNL1</i> | miR-4705                    | 5  |
| <i>circATRNL1</i> | miR-4716-5p                 | 4  |
| <i>circATRNL1</i> | miR-4724-5p                 | 2  |
| <i>circATRNL1</i> | miR-4727-5p                 | 4  |
| <i>circATRNL1</i> | miR-4728-3p                 | 5  |
| <i>circATRNL1</i> | miR-4732-5p                 | 2  |
| <i>circATRNL1</i> | miR-4742-3p                 | 7  |
| <i>circATRNL1</i> | miR-4750-3p                 | 4  |
| <i>circATRNL1</i> | miR-4759                    | 3  |
| <i>circATRNL1</i> | miR-4760-3p                 | 7  |
| <i>circATRNL1</i> | miR-4773                    | 9  |
| <i>circATRNL1</i> | miR-4780                    | 1  |
| <i>circATRNL1</i> | miR-4786-3p                 | 3  |
| <i>circATRNL1</i> | miR-4795-3p                 | 6  |
| <i>circATRNL1</i> | miR-4797-3p                 | 2  |
| <i>circATRNL1</i> | miR-4799-5p                 | 2  |
| <i>circATRNL1</i> | miR-4802-5p                 | 1  |
| <i>circATRNL1</i> | miR-486-5p                  | 6  |
| <i>circATRNL1</i> | miR-489-3p                  | 6  |
| <i>circATRNL1</i> | miR-492                     | 1  |
| <i>circATRNL1</i> | miR-499a-5p                 | 3  |
| <i>circATRNL1</i> | miR-5000-3p                 | 2  |
| <i>circATRNL1</i> | miR-5001-3p                 | 4  |
| <i>circATRNL1</i> | miR-500b-3p                 | 3  |
| <i>circATRNL1</i> | miR-508-5p                  | 10 |
| <i>circATRNL1</i> | miR-5092                    | 2  |
| <i>circATRNL1</i> | miR-512-5p                  | 2  |
| <i>circATRNL1</i> | miR-513a-3p/513c-3p/3606-3p | 2  |
| <i>circATRNL1</i> | miR-513b-3p                 | 5  |
| <i>circATRNL1</i> | miR-5187-3p                 | 5  |
| <i>circATRNL1</i> | miR-5192                    | 1  |
| <i>circATRNL1</i> | miR-542-3p                  | 4  |
| <i>circATRNL1</i> | miR-543                     | 6  |

|                   |                                                                  |    |
|-------------------|------------------------------------------------------------------|----|
| <i>circATRNL1</i> | miR-544a                                                         | 4  |
| <i>circATRNL1</i> | miR-548ac/548bb-3p/548d-3p/548h-3p/548z                          | 5  |
| <i>circATRNL1</i> | miR-548ap-3p/548aa/548t-3p                                       | 5  |
| <i>circATRNL1</i> | miR-548aq-3p/548am-3p/548aj-3p/548ah73p/548ae-3p/548j-3p/548x-3p | 5  |
| <i>circATRNL1</i> | miR-548as-3p                                                     | 5  |
| <i>circATRNL1</i> | miR-548av-3p                                                     | 3  |
| <i>circATRNL1</i> | miR-548av-5p/548k/8054                                           | 1  |
| <i>circATRNL1</i> | miR-548ay-3p/548at-3p                                            | 5  |
| <i>circATRNL1</i> | miR-548ay-5p/548au-5p/548as-5p/548ar-5p/548aq-5p/548ap-5p/548am- | 5  |
| <i>circATRNL1</i> | miR-548az-3p/548ar-3p/548a-3p/548e-3p/548f-3p                    | 5  |
| <i>circATRNL1</i> | miR-548az-5p/548t-5p                                             | 2  |
| <i>circATRNL1</i> | miR-548b-3p                                                      | 10 |
| <i>circATRNL1</i> | miR-548l                                                         | 1  |
| <i>circATRNL1</i> | miR-548n                                                         | 2  |
| <i>circATRNL1</i> | miR-549a                                                         | 4  |
| <i>circATRNL1</i> | miR-552-5p                                                       | 2  |
| <i>circATRNL1</i> | miR-5579-5p                                                      | 5  |
| <i>circATRNL1</i> | miR-5581-3p                                                      | 6  |
| <i>circATRNL1</i> | miR-5582-3p                                                      | 3  |
| <i>circATRNL1</i> | miR-5583-3p                                                      | 5  |
| <i>circATRNL1</i> | miR-5584-5p                                                      | 2  |
| <i>circATRNL1</i> | miR-5586-3p                                                      | 2  |
| <i>circATRNL1</i> | miR-5586-5p                                                      | 5  |
| <i>circATRNL1</i> | miR-5590-5p                                                      | 6  |
| <i>circATRNL1</i> | miR-567                                                          | 4  |
| <i>circATRNL1</i> | miR-568                                                          | 7  |
| <i>circATRNL1</i> | miR-5681b                                                        | 6  |
| <i>circATRNL1</i> | miR-5683                                                         | 4  |
| <i>circATRNL1</i> | miR-5689                                                         | 5  |
| <i>circATRNL1</i> | miR-5696                                                         | 5  |
| <i>circATRNL1</i> | miR-5707                                                         | 2  |
| <i>circATRNL1</i> | miR-574-5p                                                       | 2  |
| <i>circATRNL1</i> | miR-576-5p                                                       | 2  |
| <i>circATRNL1</i> | miR-579-3p                                                       | 5  |
| <i>circATRNL1</i> | miR-584-5p                                                       | 5  |
| <i>circATRNL1</i> | miR-591                                                          | 5  |
| <i>circATRNL1</i> | miR-607                                                          | 4  |
| <i>circATRNL1</i> | miR-6126                                                         | 3  |

|                   |                     |    |
|-------------------|---------------------|----|
| <i>circATRNL1</i> | miR-629-5p          | 2  |
| <i>circATRNL1</i> | miR-630             | 6  |
| <i>circATRNL1</i> | miR-642a-5p         | 4  |
| <i>circATRNL1</i> | miR-643             | 8  |
| <i>circATRNL1</i> | miR-6512-5p         | 3  |
| <i>circATRNL1</i> | miR-6514-5p         | 1  |
| <i>circATRNL1</i> | miR-656-3p          | 5  |
| <i>circATRNL1</i> | miR-659-5p          | 1  |
| <i>circATRNL1</i> | miR-660-5p          | 5  |
| <i>circATRNL1</i> | miR-664a-3p         | 7  |
| <i>circATRNL1</i> | miR-6738-3p         | 4  |
| <i>circATRNL1</i> | miR-6740-5p         | 2  |
| <i>circATRNL1</i> | miR-675-3p          | 9  |
| <i>circATRNL1</i> | miR-6750-5p/6822-5p | 2  |
| <i>circATRNL1</i> | miR-6758-5p/6856-5p | 2  |
| <i>circATRNL1</i> | miR-6759-3p         | 1  |
| <i>circATRNL1</i> | miR-6771-3p         | 6  |
| <i>circATRNL1</i> | miR-6778-3p         | 4  |
| <i>circATRNL1</i> | miR-6780b-3p        | 1  |
| <i>circATRNL1</i> | miR-6791-3p/6829-3p | 4  |
| <i>circATRNL1</i> | miR-6808-3p         | 4  |
| <i>circATRNL1</i> | miR-6813-3p         | 2  |
| <i>circATRNL1</i> | miR-6816-3p         | 3  |
| <i>circATRNL1</i> | miR-6826-3p         | 1  |
| <i>circATRNL1</i> | miR-6832-5p         | 2  |
| <i>circATRNL1</i> | miR-6834-3p         | 11 |
| <i>circATRNL1</i> | miR-6836-3p         | 4  |
| <i>circATRNL1</i> | miR-6841-3p         | 2  |
| <i>circATRNL1</i> | miR-6857-3p         | 6  |
| <i>circATRNL1</i> | miR-6861-3p         | 1  |
| <i>circATRNL1</i> | miR-6864-5p         | 3  |
| <i>circATRNL1</i> | miR-6866-5p         | 2  |
| <i>circATRNL1</i> | miR-6873-5p         | 2  |
| <i>circATRNL1</i> | miR-7150            | 5  |
| <i>circATRNL1</i> | miR-7152-5p         | 9  |
| <i>circATRNL1</i> | miR-7153-3p         | 5  |
| <i>circATRNL1</i> | miR-7154-5p         | 4  |
| <i>circATRNL1</i> | miR-7515            | 2  |

|                   |                     |   |
|-------------------|---------------------|---|
| <i>circATRNL1</i> | miR-7843-3p         | 3 |
| <i>circATRNL1</i> | miR-8076            | 7 |
| <i>circATRNL1</i> | miR-8080            | 3 |
| <i>circATRNL1</i> | miR-8083            | 3 |
| <i>circATRNL1</i> | miR-8087            | 2 |
| <i>circATRNL1</i> | miR-877-5p          | 2 |
| <i>circATRNL1</i> | miR-888-3p          | 4 |
| <i>circATRNL1</i> | miR-9-3p            | 2 |
| <i>circATRNL1</i> | miR-93-3p           | 5 |
| <i>circATRNL1</i> | miR-936             | 6 |
| <i>circATRNL1</i> | miR-943             | 4 |
| <i>circATRNL1</i> | miR-9500            | 2 |
| <i>circATRNL1</i> | miR-96-3p           | 4 |
| <i>circATRNL1</i> | miR-96-5p/1271-5p   | 5 |
| <i>circATRNL1</i> | miR-1264            | 1 |
| <i>circATRNL1</i> | miR-1276            | 4 |
| <i>circATRNL1</i> | miR-1279            | 2 |
| <i>circATRNL1</i> | miR-1306-5p         | 1 |
| <i>circATRNL1</i> | miR-142-3p.2        | 2 |
| <i>circATRNL1</i> | miR-200c-5p/550a-3p | 1 |
| <i>circATRNL1</i> | miR-221-5p/8073     | 3 |
| <i>circATRNL1</i> | miR-26-5p           | 1 |
| <i>circATRNL1</i> | miR-29b-1-5p        | 3 |
| <i>circATRNL1</i> | miR-3123            | 2 |
| <i>circATRNL1</i> | miR-3128            | 7 |
| <i>circATRNL1</i> | miR-3144-3p         | 1 |
| <i>circATRNL1</i> | miR-3152-3p         | 1 |
| <i>circATRNL1</i> | miR-3156-5p         | 1 |
| <i>circATRNL1</i> | miR-3184-3p         | 1 |
| <i>circATRNL1</i> | miR-3187-3p         | 2 |
| <i>circATRNL1</i> | miR-325             | 1 |
| <i>circATRNL1</i> | miR-329-3p/362-3p   | 1 |
| <i>circATRNL1</i> | miR-335-3p          | 5 |
| <i>circATRNL1</i> | miR-342-3p          | 4 |
| <i>circATRNL1</i> | miR-3591-5p         | 2 |
| <i>circATRNL1</i> | miR-3680-5p         | 3 |
| <i>circATRNL1</i> | miR-383-5p.2        | 1 |
| <i>circATRNL1</i> | miR-3925-5p         | 2 |

|                   |                             |   |
|-------------------|-----------------------------|---|
| <i>circATRNL1</i> | miR-3938                    | 4 |
| <i>circATRNL1</i> | miR-3941                    | 1 |
| <i>circATRNL1</i> | miR-4255                    | 3 |
| <i>circATRNL1</i> | miR-4268                    | 1 |
| <i>circATRNL1</i> | miR-4292/6791-5p            | 2 |
| <i>circATRNL1</i> | miR-4308                    | 2 |
| <i>circATRNL1</i> | miR-4311                    | 4 |
| <i>circATRNL1</i> | miR-4435                    | 2 |
| <i>circATRNL1</i> | miR-4448                    | 1 |
| <i>circATRNL1</i> | miR-4672                    | 1 |
| <i>circATRNL1</i> | miR-4694-3p                 | 1 |
| <i>circATRNL1</i> | miR-4699-5p                 | 3 |
| <i>circATRNL1</i> | miR-4709-3p                 | 4 |
| <i>circATRNL1</i> | miR-4712-3p                 | 1 |
| <i>circATRNL1</i> | miR-4720-5p/4799-3p/5588-5p | 7 |
| <i>circATRNL1</i> | miR-4755-5p/5006-3p         | 1 |
| <i>circATRNL1</i> | miR-4764-3p                 | 3 |
| <i>circATRNL1</i> | miR-4798-3p                 | 3 |
| <i>circATRNL1</i> | miR-5003-3p                 | 1 |
| <i>circATRNL1</i> | miR-5007-3p                 | 4 |
| <i>circATRNL1</i> | miR-522-3p                  | 1 |
| <i>circATRNL1</i> | miR-539-3p                  | 1 |
| <i>circATRNL1</i> | miR-539-5p                  | 2 |
| <i>circATRNL1</i> | miR-548s                    | 2 |
| <i>circATRNL1</i> | miR-5680                    | 3 |
| <i>circATRNL1</i> | miR-5694                    | 1 |
| <i>circATRNL1</i> | miR-583                     | 4 |
| <i>circATRNL1</i> | miR-588                     | 2 |
| <i>circATRNL1</i> | miR-595                     | 2 |
| <i>circATRNL1</i> | miR-603                     | 1 |
| <i>circATRNL1</i> | miR-6128                    | 2 |
| <i>circATRNL1</i> | miR-628-3p                  | 1 |
| <i>circATRNL1</i> | miR-642b-5p                 | 1 |
| <i>circATRNL1</i> | miR-6504-3p                 | 4 |
| <i>circATRNL1</i> | miR-6513-3p                 | 2 |
| <i>circATRNL1</i> | miR-670-5p                  | 2 |
| <i>circATRNL1</i> | miR-6739-3p                 | 2 |
| <i>circATRNL1</i> | miR-6750-3p                 | 3 |

|                   |                     |   |
|-------------------|---------------------|---|
| <i>circATRNL1</i> | miR-6826-5p         | 2 |
| <i>circATRNL1</i> | miR-6831-3p         | 2 |
| <i>circATRNL1</i> | miR-6868-5p         | 7 |
| <i>circATRNL1</i> | miR-7-3p            | 2 |
| <i>circATRNL1</i> | miR-7151-5p         | 1 |
| <i>circATRNL1</i> | miR-7705            | 2 |
| <i>circATRNL1</i> | miR-7848-3p         | 1 |
| <i>circATRNL1</i> | miR-7849-3p         | 4 |
| <i>circATRNL1</i> | miR-7856-5p         | 4 |
| <i>circATRNL1</i> | miR-8060            | 2 |
| <i>circATRNL1</i> | miR-8074            | 2 |
| <i>circATRNL1</i> | miR-8485            | 1 |
| <i>circATRNL1</i> | miR-95-5p           | 5 |
| <i>circATRNL1</i> | miR-1202/3972       | 1 |
| <i>circATRNL1</i> | miR-1207-3p         | 4 |
| <i>circATRNL1</i> | miR-1225-5p         | 1 |
| <i>circATRNL1</i> | miR-1226-3p         | 2 |
| <i>circATRNL1</i> | miR-1229-5p         | 1 |
| <i>circATRNL1</i> | miR-1238-3p         | 2 |
| <i>circATRNL1</i> | miR-1250-3p         | 5 |
| <i>circATRNL1</i> | miR-1323            | 2 |
| <i>circATRNL1</i> | miR-140-3p.2        | 2 |
| <i>circATRNL1</i> | miR-185-3p          | 2 |
| <i>circATRNL1</i> | miR-197-3p          | 1 |
| <i>circATRNL1</i> | miR-29-3p           | 1 |
| <i>circATRNL1</i> | miR-3115            | 1 |
| <i>circATRNL1</i> | miR-3121-3p         | 1 |
| <i>circATRNL1</i> | miR-3161            | 2 |
| <i>circATRNL1</i> | miR-3173-3p/6891-5p | 3 |
| <i>circATRNL1</i> | miR-3610            | 1 |
| <i>circATRNL1</i> | miR-3613-3p         | 1 |
| <i>circATRNL1</i> | miR-3653-3p         | 2 |
| <i>circATRNL1</i> | miR-3680-3p         | 4 |
| <i>circATRNL1</i> | miR-3977            | 1 |
| <i>circATRNL1</i> | miR-4301            | 2 |
| <i>circATRNL1</i> | miR-4428            | 3 |
| <i>circATRNL1</i> | miR-4436b-5p        | 2 |
| <i>circATRNL1</i> | miR-4470            | 2 |

|                   |                              |   |
|-------------------|------------------------------|---|
| <i>circATRNL1</i> | miR-4476/6876-5p             | 2 |
| <i>circATRNL1</i> | miR-4496                     | 4 |
| <i>circATRNL1</i> | miR-450b-5p                  | 4 |
| <i>circATRNL1</i> | miR-4528                     | 2 |
| <i>circATRNL1</i> | miR-4540                     | 1 |
| <i>circATRNL1</i> | miR-4633-5p                  | 1 |
| <i>circATRNL1</i> | miR-4678                     | 1 |
| <i>circATRNL1</i> | miR-4684-3p                  | 1 |
| <i>circATRNL1</i> | miR-4691-3p                  | 2 |
| <i>circATRNL1</i> | miR-4691-5p/6792-3p          | 1 |
| <i>circATRNL1</i> | miR-4733-3p                  | 2 |
| <i>circATRNL1</i> | miR-4755-3p                  | 2 |
| <i>circATRNL1</i> | miR-4786-5p                  | 1 |
| <i>circATRNL1</i> | miR-4795-5p                  | 1 |
| <i>circATRNL1</i> | miR-493-3p                   | 3 |
| <i>circATRNL1</i> | miR-5006-5p                  | 1 |
| <i>circATRNL1</i> | miR-500a-3p                  | 3 |
| <i>circATRNL1</i> | miR-503-3p                   | 1 |
| <i>circATRNL1</i> | miR-507/557                  | 4 |
| <i>circATRNL1</i> | miR-5093                     | 1 |
| <i>circATRNL1</i> | miR-519d-5p                  | 1 |
| <i>circATRNL1</i> | miR-548ai/548ag/548ba/570-5p | 2 |
| <i>circATRNL1</i> | miR-548g-3p                  | 1 |
| <i>circATRNL1</i> | miR-5695                     | 1 |
| <i>circATRNL1</i> | miR-597-5p                   | 2 |
| <i>circATRNL1</i> | miR-6082                     | 1 |
| <i>circATRNL1</i> | miR-616-3p                   | 1 |
| <i>circATRNL1</i> | miR-624-3p                   | 4 |
| <i>circATRNL1</i> | miR-634                      | 3 |
| <i>circATRNL1</i> | miR-6502-3p                  | 1 |
| <i>circATRNL1</i> | miR-6509-3p                  | 2 |
| <i>circATRNL1</i> | miR-670-3p                   | 2 |
| <i>circATRNL1</i> | miR-6723-5p                  | 1 |
| <i>circATRNL1</i> | miR-6749-3p                  | 1 |
| <i>circATRNL1</i> | miR-6792-5p                  | 1 |
| <i>circATRNL1</i> | miR-6849-3p                  | 2 |
| <i>circATRNL1</i> | miR-6871-3p                  | 1 |
| <i>circATRNL1</i> | miR-6888-5p                  | 2 |



|                   |                                       |   |
|-------------------|---------------------------------------|---|
| <i>circATRNL1</i> | miR-767-5p                            | 3 |
| <i>circATRNL1</i> | miR-769-5p                            | 1 |
| <i>circATRNL1</i> | miR-770-5p                            | 3 |
| <i>circATRNL1</i> | miR-873-5p.1                          | 2 |
| <i>circATRNL1</i> | miR-875-3p                            | 1 |
| <i>circATRNL1</i> | miR-888-5p                            | 1 |
| <i>circATRNL1</i> | let-7a-3p/let-7b-3p/let-7f-1-3p/98-3p | 2 |
| <i>circATRNL1</i> | let-7f-2-3p/1185-3p                   | 2 |
| <i>circATRNL1</i> | let-7i-3p                             | 1 |
| <i>circATRNL1</i> | miR-106a-3p                           | 2 |
| <i>circATRNL1</i> | miR-1178-3p                           | 1 |
| <i>circATRNL1</i> | miR-1179                              | 1 |
| <i>circATRNL1</i> | miR-1184                              | 3 |
| <i>circATRNL1</i> | miR-1205                              | 3 |
| <i>circATRNL1</i> | miR-1208                              | 5 |
| <i>circATRNL1</i> | miR-1226-5p                           | 1 |
| <i>circATRNL1</i> | miR-1227-5p                           | 1 |
| <i>circATRNL1</i> | miR-1228-3p                           | 1 |
| <i>circATRNL1</i> | miR-1229-3p                           | 2 |
| <i>circATRNL1</i> | miR-1234-3p/7107-5p                   | 1 |
| <i>circATRNL1</i> | miR-1236-3p                           | 1 |
| <i>circATRNL1</i> | miR-1237-3p                           | 1 |
| <i>circATRNL1</i> | miR-1243                              | 2 |
| <i>circATRNL1</i> | miR-1245a/8079                        | 1 |
| <i>circATRNL1</i> | miR-1248                              | 1 |
| <i>circATRNL1</i> | miR-1249-5p/6797-5p                   | 1 |
| <i>circATRNL1</i> | miR-1251-5p                           | 2 |
| <i>circATRNL1</i> | miR-1254/3116                         | 1 |
| <i>circATRNL1</i> | miR-1256                              | 4 |
| <i>circATRNL1</i> | miR-125a-3p                           | 2 |
| <i>circATRNL1</i> | miR-126-5p                            | 3 |
| <i>circATRNL1</i> | miR-1260a/1260b                       | 1 |
| <i>circATRNL1</i> | miR-1267                              | 2 |
| <i>circATRNL1</i> | miR-1272                              | 1 |
| <i>circATRNL1</i> | miR-1273f                             | 2 |
| <i>circATRNL1</i> | miR-1273g-3p                          | 4 |
| <i>circATRNL1</i> | miR-1285-5p                           | 1 |
| <i>circATRNL1</i> | miR-1287-5p                           | 1 |

|                   |                                      |   |
|-------------------|--------------------------------------|---|
| <i>circATRNL1</i> | miR-129-3p                           | 1 |
| <i>circATRNL1</i> | miR-1295b-3p                         | 2 |
| <i>circATRNL1</i> | miR-1295b-5p/1912                    | 1 |
| <i>circATRNL1</i> | miR-1301-3p                          | 1 |
| <i>circATRNL1</i> | miR-1301-5p/6502-5p                  | 1 |
| <i>circATRNL1</i> | miR-1303                             | 2 |
| <i>circATRNL1</i> | miR-1304-3p                          | 1 |
| <i>circATRNL1</i> | miR-1304-5p                          | 2 |
| <i>circATRNL1</i> | miR-1322                             | 1 |
| <i>circATRNL1</i> | miR-133a-3p.1                        | 1 |
| <i>circATRNL1</i> | miR-133a-3p.2/133b                   | 2 |
| <i>circATRNL1</i> | miR-133a-5p                          | 2 |
| <i>circATRNL1</i> | miR-135-5p                           | 1 |
| <i>circATRNL1</i> | miR-138-2-3p                         | 1 |
| <i>circATRNL1</i> | miR-138-5p                           | 2 |
| <i>circATRNL1</i> | miR-141-5p                           | 5 |
| <i>circATRNL1</i> | miR-142-3p.1                         | 1 |
| <i>circATRNL1</i> | miR-143-3p                           | 2 |
| <i>circATRNL1</i> | miR-143-5p                           | 1 |
| <i>circATRNL1</i> | miR-144-5p                           | 1 |
| <i>circATRNL1</i> | miR-147a                             | 1 |
| <i>circATRNL1</i> | miR-148a-5p                          | 1 |
| <i>circATRNL1</i> | miR-148b-5p/6874-3p                  | 3 |
| <i>circATRNL1</i> | miR-15-5p/16-5p/195-5p/424-5p/497-5p | 2 |
| <i>circATRNL1</i> | miR-152-5p                           | 1 |
| <i>circATRNL1</i> | miR-15b-3p                           | 1 |
| <i>circATRNL1</i> | miR-17-3p                            | 3 |
| <i>circATRNL1</i> | miR-181-3p/4420                      | 1 |
| <i>circATRNL1</i> | miR-183-5p.2                         | 2 |
| <i>circATRNL1</i> | miR-188-3p                           | 1 |
| <i>circATRNL1</i> | miR-188-5p                           | 1 |
| <i>circATRNL1</i> | miR-19-5p                            | 2 |
| <i>circATRNL1</i> | miR-1911-3p                          | 1 |
| <i>circATRNL1</i> | miR-1911-5p                          | 1 |
| <i>circATRNL1</i> | miR-1914-5p                          | 2 |
| <i>circATRNL1</i> | miR-193-3p                           | 2 |
| <i>circATRNL1</i> | miR-202-3p                           | 1 |
| <i>circATRNL1</i> | miR-203a-3p.1                        | 1 |

|                   |                                 |   |
|-------------------|---------------------------------|---|
| <i>circATRNL1</i> | miR-2052                        | 2 |
| <i>circATRNL1</i> | miR-208-5p                      | 2 |
| <i>circATRNL1</i> | miR-2115-3p                     | 1 |
| <i>circATRNL1</i> | miR-2116-5p                     | 3 |
| <i>circATRNL1</i> | miR-2117                        | 1 |
| <i>circATRNL1</i> | miR-215-3p                      | 1 |
| <i>circATRNL1</i> | miR-219b-5p                     | 1 |
| <i>circATRNL1</i> | miR-22-5p                       | 3 |
| <i>circATRNL1</i> | miR-223-5p                      | 3 |
| <i>circATRNL1</i> | miR-2355-3p                     | 2 |
| <i>circATRNL1</i> | miR-2355-5p                     | 2 |
| <i>circATRNL1</i> | miR-2467-3p                     | 1 |
| <i>circATRNL1</i> | miR-2467-5p                     | 1 |
| <i>circATRNL1</i> | miR-2681-5p                     | 3 |
| <i>circATRNL1</i> | miR-26b-3p                      | 2 |
| <i>circATRNL1</i> | miR-28-3p                       | 1 |
| <i>circATRNL1</i> | miR-29b-2-5p                    | 1 |
| <i>circATRNL1</i> | miR-301a-5p/301b-5p             | 2 |
| <i>circATRNL1</i> | miR-302-3p/372-3p/373-3p/520-3p | 1 |
| <i>circATRNL1</i> | miR-302c-3p.2/520-3p            | 1 |
| <i>circATRNL1</i> | miR-3064-5p                     | 2 |
| <i>circATRNL1</i> | miR-31-3p                       | 2 |
| <i>circATRNL1</i> | miR-31-5p                       | 1 |
| <i>circATRNL1</i> | miR-3120-5p                     | 1 |
| <i>circATRNL1</i> | miR-3124-3p                     | 2 |
| <i>circATRNL1</i> | miR-3130-3p                     | 1 |
| <i>circATRNL1</i> | miR-3130-5p/4482-5p             | 1 |
| <i>circATRNL1</i> | miR-3135b                       | 1 |
| <i>circATRNL1</i> | miR-3140-3p                     | 3 |
| <i>circATRNL1</i> | miR-3143                        | 2 |
| <i>circATRNL1</i> | miR-3148                        | 2 |
| <i>circATRNL1</i> | miR-3151-3p                     | 1 |
| <i>circATRNL1</i> | miR-3156-3p                     | 1 |
| <i>circATRNL1</i> | miR-3158-5p                     | 3 |
| <i>circATRNL1</i> | miR-3159                        | 1 |
| <i>circATRNL1</i> | miR-3160-3p                     | 1 |
| <i>circATRNL1</i> | miR-3168                        | 3 |
| <i>circATRNL1</i> | miR-3175                        | 1 |

|                   |                                   |   |
|-------------------|-----------------------------------|---|
| <i>circATRNL1</i> | miR-3177-3p                       | 1 |
| <i>circATRNL1</i> | miR-3182                          | 1 |
| <i>circATRNL1</i> | miR-3185                          | 1 |
| <i>circATRNL1</i> | miR-3188                          | 1 |
| <i>circATRNL1</i> | miR-3192-3p                       | 1 |
| <i>circATRNL1</i> | miR-320e                          | 2 |
| <i>circATRNL1</i> | miR-323-3p                        | 1 |
| <i>circATRNL1</i> | miR-323b-3p                       | 3 |
| <i>circATRNL1</i> | miR-323b-5p/410-5p/494-5p         | 1 |
| <i>circATRNL1</i> | miR-324-5p                        | 1 |
| <i>circATRNL1</i> | miR-329-5p                        | 1 |
| <i>circATRNL1</i> | miR-338-3p                        | 2 |
| <i>circATRNL1</i> | miR-34-5p/449-5p                  | 3 |
| <i>circATRNL1</i> | miR-3606-5p                       | 1 |
| <i>circATRNL1</i> | miR-361-3p                        | 1 |
| <i>circATRNL1</i> | miR-3612                          | 1 |
| <i>circATRNL1</i> | miR-3616-3p                       | 1 |
| <i>circATRNL1</i> | miR-362-5p/500b-5p                | 1 |
| <i>circATRNL1</i> | miR-3620-3p                       | 1 |
| <i>circATRNL1</i> | miR-3654                          | 2 |
| <i>circATRNL1</i> | miR-3655                          | 1 |
| <i>circATRNL1</i> | miR-3665                          | 2 |
| <i>circATRNL1</i> | miR-367-5p                        | 2 |
| <i>circATRNL1</i> | miR-3681-5p                       | 1 |
| <i>circATRNL1</i> | miR-3682-3p                       | 2 |
| <i>circATRNL1</i> | miR-3682-5p                       | 2 |
| <i>circATRNL1</i> | miR-3688-3p                       | 2 |
| <i>circATRNL1</i> | miR-3688-5p                       | 2 |
| <i>circATRNL1</i> | miR-3689a-5p/3689b-5p/3689e/3689f | 1 |
| <i>circATRNL1</i> | miR-3690                          | 1 |
| <i>circATRNL1</i> | miR-3691-5p                       | 1 |
| <i>circATRNL1</i> | miR-3692-3p                       | 1 |
| <i>circATRNL1</i> | miR-376-3p                        | 2 |
| <i>circATRNL1</i> | miR-376c-3p                       | 2 |
| <i>circATRNL1</i> | miR-377-3p                        | 1 |
| <i>circATRNL1</i> | miR-377-5p/6086                   | 1 |
| <i>circATRNL1</i> | miR-378j/6839-5p                  | 1 |
| <i>circATRNL1</i> | miR-381-3p                        | 2 |

|                   |                                              |   |
|-------------------|----------------------------------------------|---|
| <i>circATRNL1</i> | miR-3909                                     | 2 |
| <i>circATRNL1</i> | miR-3913-3p                                  | 1 |
| <i>circATRNL1</i> | miR-3921/4653-5p                             | 2 |
| <i>circATRNL1</i> | miR-3922-5p                                  | 1 |
| <i>circATRNL1</i> | miR-3929/4419b/4478                          | 2 |
| <i>circATRNL1</i> | miR-3934-5p                                  | 2 |
| <i>circATRNL1</i> | miR-3940-5p/4507                             | 1 |
| <i>circATRNL1</i> | miR-3942-3p                                  | 1 |
| <i>circATRNL1</i> | miR-3944-5p                                  | 2 |
| <i>circATRNL1</i> | miR-3973                                     | 1 |
| <i>circATRNL1</i> | miR-3975                                     | 1 |
| <i>circATRNL1</i> | miR-3978                                     | 2 |
| <i>circATRNL1</i> | miR-421                                      | 1 |
| <i>circATRNL1</i> | miR-423-5p                                   | 1 |
| <i>circATRNL1</i> | miR-425-5p                                   | 1 |
| <i>circATRNL1</i> | miR-4252                                     | 5 |
| <i>circATRNL1</i> | miR-4254                                     | 1 |
| <i>circATRNL1</i> | miR-4259                                     | 1 |
| <i>circATRNL1</i> | miR-4260                                     | 1 |
| <i>circATRNL1</i> | miR-4289                                     | 3 |
| <i>circATRNL1</i> | miR-4293                                     | 2 |
| <i>circATRNL1</i> | miR-4305                                     | 2 |
| <i>circATRNL1</i> | miR-4312                                     | 1 |
| <i>circATRNL1</i> | miR-4318                                     | 1 |
| <i>circATRNL1</i> | miR-4325                                     | 1 |
| <i>circATRNL1</i> | miR-4330                                     | 1 |
| <i>circATRNL1</i> | miR-4423-3p                                  | 2 |
| <i>circATRNL1</i> | miR-4436b-3p/4632-5p/6735-5p/6879-5p/7843-5p |   |
| <i>circATRNL1</i> | miR-4443                                     | 1 |
| <i>circATRNL1</i> | miR-4464/4748                                | 2 |
| <i>circATRNL1</i> | miR-4468                                     | 2 |
| <i>circATRNL1</i> | miR-4477b                                    | 1 |
| <i>circATRNL1</i> | miR-4487                                     | 1 |
| <i>circATRNL1</i> | miR-4490                                     | 2 |
| <i>circATRNL1</i> | miR-4503                                     | 1 |
| <i>circATRNL1</i> | miR-450a-2-3p                                | 1 |
| <i>circATRNL1</i> | miR-451b                                     | 2 |
| <i>circATRNL1</i> | miR-452-5p/892-3p                            | 1 |

|                   |                       |   |
|-------------------|-----------------------|---|
| <i>circATRNL1</i> | miR-4520-2-3p         | 1 |
| <i>circATRNL1</i> | miR-4520-3p           | 1 |
| <i>circATRNL1</i> | miR-4522              | 1 |
| <i>circATRNL1</i> | miR-4529-3p           | 1 |
| <i>circATRNL1</i> | miR-4530              | 2 |
| <i>circATRNL1</i> | miR-4535              | 2 |
| <i>circATRNL1</i> | miR-455-3p.2          | 1 |
| <i>circATRNL1</i> | miR-4637              | 1 |
| <i>circATRNL1</i> | miR-4639-3p           | 2 |
| <i>circATRNL1</i> | miR-4642              | 3 |
| <i>circATRNL1</i> | miR-4645-5p/4673      | 1 |
| <i>circATRNL1</i> | miR-4646-3p           | 2 |
| <i>circATRNL1</i> | miR-4659a-3p/4659b-3p | 1 |
| <i>circATRNL1</i> | miR-466               | 1 |
| <i>circATRNL1</i> | miR-4660              | 1 |
| <i>circATRNL1</i> | miR-4661-3p           | 1 |
| <i>circATRNL1</i> | miR-4666a-3p          | 2 |
| <i>circATRNL1</i> | miR-4666a-5p          | 1 |
| <i>circATRNL1</i> | miR-4666b             | 2 |
| <i>circATRNL1</i> | miR-4668-3p           | 1 |
| <i>circATRNL1</i> | miR-4686              | 2 |
| <i>circATRNL1</i> | miR-4687-3p           | 2 |
| <i>circATRNL1</i> | miR-4687-5p           | 1 |
| <i>circATRNL1</i> | miR-4690-3p/5685      | 1 |
| <i>circATRNL1</i> | miR-4690-5p           | 2 |
| <i>circATRNL1</i> | miR-4695-3p           | 1 |
| <i>circATRNL1</i> | miR-4695-5p           | 1 |
| <i>circATRNL1</i> | miR-4708-5p           | 2 |
| <i>circATRNL1</i> | miR-4709-5p           | 2 |
| <i>circATRNL1</i> | miR-4710              | 1 |
| <i>circATRNL1</i> | miR-4715-3p           | 3 |
| <i>circATRNL1</i> | miR-4715-5p           | 1 |
| <i>circATRNL1</i> | miR-4717-3p           | 1 |
| <i>circATRNL1</i> | miR-4717-5p           | 1 |
| <i>circATRNL1</i> | miR-4719              | 2 |
| <i>circATRNL1</i> | miR-4721              | 1 |
| <i>circATRNL1</i> | miR-4722-3p/6727-3p   | 1 |
| <i>circATRNL1</i> | miR-4753-5p           | 1 |

|                   |                             |   |
|-------------------|-----------------------------|---|
| <i>circATRNL1</i> | miR-4757-5p/6744-3p         | 1 |
| <i>circATRNL1</i> | miR-4761-3p                 | 1 |
| <i>circATRNL1</i> | miR-4761-5p                 | 1 |
| <i>circATRNL1</i> | miR-4762-5p                 | 2 |
| <i>circATRNL1</i> | miR-4763-5p                 | 1 |
| <i>circATRNL1</i> | miR-4766-5p                 | 1 |
| <i>circATRNL1</i> | miR-4769-3p/6817-5p         | 1 |
| <i>circATRNL1</i> | miR-4774-5p                 | 2 |
| <i>circATRNL1</i> | miR-4776-5p                 | 2 |
| <i>circATRNL1</i> | miR-4777-5p                 | 2 |
| <i>circATRNL1</i> | miR-4778-3p                 | 1 |
| <i>circATRNL1</i> | miR-4779                    | 1 |
| <i>circATRNL1</i> | miR-4789-5p                 | 2 |
| <i>circATRNL1</i> | miR-4792                    | 1 |
| <i>circATRNL1</i> | miR-4793-3p                 | 1 |
| <i>circATRNL1</i> | miR-4793-5p                 | 1 |
| <i>circATRNL1</i> | miR-4802-3p                 | 1 |
| <i>circATRNL1</i> | miR-483-3p.2                | 1 |
| <i>circATRNL1</i> | miR-484/3155                | 1 |
| <i>circATRNL1</i> | miR-485-5p                  | 1 |
| <i>circATRNL1</i> | miR-486-3p                  | 1 |
| <i>circATRNL1</i> | miR-488-3p                  | 1 |
| <i>circATRNL1</i> | miR-490-3p                  | 1 |
| <i>circATRNL1</i> | miR-490-5p                  | 1 |
| <i>circATRNL1</i> | miR-494-3p                  | 2 |
| <i>circATRNL1</i> | miR-495-3p                  | 1 |
| <i>circATRNL1</i> | miR-496.2                   | 1 |
| <i>circATRNL1</i> | miR-5003-5p                 | 1 |
| <i>circATRNL1</i> | miR-5007-5p                 | 3 |
| <i>circATRNL1</i> | miR-5008-3p/6737-3p/7157-3p | 1 |
| <i>circATRNL1</i> | miR-501-3p/502-3p           | 1 |
| <i>circATRNL1</i> | miR-501-5p                  | 1 |
| <i>circATRNL1</i> | miR-5011-3p                 | 2 |
| <i>circATRNL1</i> | miR-503-5p                  | 2 |
| <i>circATRNL1</i> | miR-505-3p.1                | 1 |
| <i>circATRNL1</i> | miR-505-3p.2                | 1 |
| <i>circATRNL1</i> | miR-509-3p                  | 1 |
| <i>circATRNL1</i> | miR-5096                    | 2 |

|                   |                     |   |
|-------------------|---------------------|---|
| <i>circATRNL1</i> | miR-511-5p          | 1 |
| <i>circATRNL1</i> | miR-512-3p          | 1 |
| <i>circATRNL1</i> | miR-513c-5p/514b-5p | 1 |
| <i>circATRNL1</i> | miR-514a-3p         | 3 |
| <i>circATRNL1</i> | miR-517-5p          | 2 |
| <i>circATRNL1</i> | miR-5186            | 1 |
| <i>circATRNL1</i> | miR-518d-5p/519-5p  | 2 |
| <i>circATRNL1</i> | miR-519-3p          | 1 |
| <i>circATRNL1</i> | miR-5190            | 1 |
| <i>circATRNL1</i> | miR-5194            | 1 |
| <i>circATRNL1</i> | miR-5196-3p         | 1 |
| <i>circATRNL1</i> | miR-520f-5p         | 3 |
| <i>circATRNL1</i> | miR-520g-3p         | 1 |
| <i>circATRNL1</i> | miR-524-5p          | 2 |
| <i>circATRNL1</i> | miR-525-5p          | 3 |
| <i>circATRNL1</i> | miR-526b-5p         | 2 |
| <i>circATRNL1</i> | miR-545-3p          | 1 |
| <i>circATRNL1</i> | miR-548at-5p        | 5 |
| <i>circATRNL1</i> | miR-548au-3p        | 3 |
| <i>circATRNL1</i> | miR-552-3p          | 4 |
| <i>circATRNL1</i> | miR-556-3p          | 1 |
| <i>circATRNL1</i> | miR-5572            | 1 |
| <i>circATRNL1</i> | miR-5579-3p         | 1 |
| <i>circATRNL1</i> | miR-558             | 1 |
| <i>circATRNL1</i> | miR-5580-5p         | 1 |
| <i>circATRNL1</i> | miR-5584-3p         | 3 |
| <i>circATRNL1</i> | miR-5587-5p         | 1 |
| <i>circATRNL1</i> | miR-5591-3p         | 1 |
| <i>circATRNL1</i> | miR-561-3p          | 5 |
| <i>circATRNL1</i> | miR-5684            | 3 |
| <i>circATRNL1</i> | miR-5691            | 1 |
| <i>circATRNL1</i> | miR-5700            | 2 |
| <i>circATRNL1</i> | miR-5702            | 3 |
| <i>circATRNL1</i> | miR-5705            | 1 |
| <i>circATRNL1</i> | miR-578             | 3 |
| <i>circATRNL1</i> | miR-584-3p          | 1 |
| <i>circATRNL1</i> | miR-586             | 1 |
| <i>circATRNL1</i> | miR-589-3p          | 2 |



|                   |                  |   |
|-------------------|------------------|---|
| <i>circATRNL1</i> | miR-592          | 2 |
| <i>circATRNL1</i> | miR-593-3p       | 2 |
| <i>circATRNL1</i> | miR-593-5p       | 1 |
| <i>circATRNL1</i> | miR-596          | 2 |
| <i>circATRNL1</i> | miR-597-3p       | 1 |
| <i>circATRNL1</i> | miR-599          | 2 |
| <i>circATRNL1</i> | miR-600          | 1 |
| <i>circATRNL1</i> | miR-605-5p       | 1 |
| <i>circATRNL1</i> | miR-6071         | 1 |
| <i>circATRNL1</i> | miR-6073         | 1 |
| <i>circATRNL1</i> | miR-6081         | 2 |
| <i>circATRNL1</i> | miR-6090         | 2 |
| <i>circATRNL1</i> | miR-6124         | 2 |
| <i>circATRNL1</i> | miR-6131         | 2 |
| <i>circATRNL1</i> | miR-6165         | 2 |
| <i>circATRNL1</i> | miR-619-3p       | 1 |
| <i>circATRNL1</i> | miR-626/6876-3p  | 1 |
| <i>circATRNL1</i> | miR-627-3p       | 1 |
| <i>circATRNL1</i> | miR-641/3617-5p  | 1 |
| <i>circATRNL1</i> | miR-646          | 2 |
| <i>circATRNL1</i> | miR-649          | 1 |
| <i>circATRNL1</i> | miR-6505-5p      | 1 |
| <i>circATRNL1</i> | miR-6508-5p/8067 | 1 |
| <i>circATRNL1</i> | miR-6510-5p      | 2 |
| <i>circATRNL1</i> | miR-6515-3p      | 1 |
| <i>circATRNL1</i> | miR-6515-5p      | 1 |
| <i>circATRNL1</i> | miR-653-3p       | 1 |
| <i>circATRNL1</i> | miR-654-3p       | 1 |
| <i>circATRNL1</i> | miR-655-5p       | 1 |
| <i>circATRNL1</i> | miR-657          | 2 |
| <i>circATRNL1</i> | miR-659-3p       | 2 |
| <i>circATRNL1</i> | miR-661          | 1 |
| <i>circATRNL1</i> | miR-671-5p       | 1 |
| <i>circATRNL1</i> | miR-6729-3p      | 2 |
| <i>circATRNL1</i> | miR-6734-5p      | 1 |
| <i>circATRNL1</i> | miR-6740-3p      | 1 |
| <i>circATRNL1</i> | miR-6747-3p      | 1 |
| <i>circATRNL1</i> | miR-6758-3p      | 1 |

|                   |                     |   |
|-------------------|---------------------|---|
| <i>circATRNL1</i> | miR-676-3p          | 2 |
| <i>circATRNL1</i> | miR-676-5p          | 1 |
| <i>circATRNL1</i> | miR-6760-3p         | 5 |
| <i>circATRNL1</i> | miR-6763-3p         | 1 |
| <i>circATRNL1</i> | miR-6773-3p         | 1 |
| <i>circATRNL1</i> | miR-6777-3p         | 3 |
| <i>circATRNL1</i> | miR-6779-3p         | 1 |
| <i>circATRNL1</i> | miR-6780a-3p        | 2 |
| <i>circATRNL1</i> | miR-6782-3p         | 1 |
| <i>circATRNL1</i> | miR-6783-5p         | 1 |
| <i>circATRNL1</i> | miR-6788-3p         | 1 |
| <i>circATRNL1</i> | miR-6793-3p         | 3 |
| <i>circATRNL1</i> | miR-6809-5p         | 1 |
| <i>circATRNL1</i> | miR-6814-3p/6872-5p | 1 |
| <i>circATRNL1</i> | miR-6814-5p         | 2 |
| <i>circATRNL1</i> | miR-6815-5p/6865-5p | 2 |
| <i>circATRNL1</i> | miR-6818-3p         | 1 |
| <i>circATRNL1</i> | miR-6818-5p         | 1 |
| <i>circATRNL1</i> | miR-6825-5p         | 1 |
| <i>circATRNL1</i> | miR-6828-3p         | 1 |
| <i>circATRNL1</i> | miR-6828-5p         | 1 |
| <i>circATRNL1</i> | miR-6832-3p         | 1 |
| <i>circATRNL1</i> | miR-6834-5p         | 1 |
| <i>circATRNL1</i> | miR-6839-3p         | 1 |
| <i>circATRNL1</i> | miR-6844            | 1 |
| <i>circATRNL1</i> | miR-6847-3p         | 1 |
| <i>circATRNL1</i> | miR-6868-3p         | 1 |
| <i>circATRNL1</i> | miR-6872-3p         | 1 |
| <i>circATRNL1</i> | miR-6875-3p         | 1 |
| <i>circATRNL1</i> | miR-6879-3p         | 1 |
| <i>circATRNL1</i> | miR-6881-3p         | 2 |
| <i>circATRNL1</i> | miR-6885-3p         | 1 |
| <i>circATRNL1</i> | miR-6886-3p         | 1 |
| <i>circATRNL1</i> | miR-6888-3p         | 1 |
| <i>circATRNL1</i> | miR-6889-3p         | 1 |
| <i>circATRNL1</i> | miR-6895-3p         | 2 |
| <i>circATRNL1</i> | miR-7109-3p         | 4 |
| <i>circATRNL1</i> | miR-711             | 1 |

|                   |                              |   |
|-------------------|------------------------------|---|
| <i>circATRNL1</i> | miR-7111-3p                  | 2 |
| <i>circATRNL1</i> | miR-7114-5p                  | 2 |
| <i>circATRNL1</i> | miR-7156-3p                  | 1 |
| <i>circATRNL1</i> | miR-7159-5p                  | 1 |
| <i>circATRNL1</i> | miR-759                      | 2 |
| <i>circATRNL1</i> | miR-767-3p                   | 1 |
| <i>circATRNL1</i> | miR-7703                     | 1 |
| <i>circATRNL1</i> | miR-7851-3p                  | 1 |
| <i>circATRNL1</i> | miR-7974                     | 2 |
| <i>circATRNL1</i> | miR-8055                     | 2 |
| <i>circATRNL1</i> | miR-8056                     | 1 |
| <i>circATRNL1</i> | miR-8062                     | 1 |
| <i>circATRNL1</i> | miR-8064                     | 1 |
| <i>circATRNL1</i> | miR-8068                     | 2 |
| <i>circATRNL1</i> | miR-877-3p                   | 2 |
| <i>circATRNL1</i> | miR-885-5p                   | 1 |
| <i>circATRNL1</i> | miR-889-5p                   | 1 |
| <i>circATRNL1</i> | miR-891a-3p                  | 2 |
| <i>circATRNL1</i> | miR-892a                     | 1 |
| <i>circATRNL1</i> | miR-9-5p                     | 1 |
| <i>circATRNL1</i> | miR-920/4300/5591-5p/6726-5p | 2 |
| <i>circATRNL1</i> | miR-921                      | 1 |
| <i>circATRNL1</i> | miR-92a-1-5p                 | 1 |
| <i>circATRNL1</i> | miR-938                      | 1 |
| <i>circATRNL1</i> | miR-939-5p/1343-5p           | 1 |
| <i>circATRNL1</i> | miR-99-5p/100-5p             | 1 |
| <i>circATRNL1</i> | miR-103a-2-5p                | 1 |
| <i>circATRNL1</i> | miR-1253                     | 2 |
| <i>circATRNL1</i> | miR-1295a                    | 1 |
| <i>circATRNL1</i> | miR-1537-5p                  | 1 |
| <i>circATRNL1</i> | miR-183-5p.1                 | 2 |
| <i>circATRNL1</i> | miR-214-3p/3619-5p           | 2 |
| <i>circATRNL1</i> | miR-219-5p                   | 1 |
| <i>circATRNL1</i> | miR-3065-5p                  | 2 |
| <i>circATRNL1</i> | miR-3605-3p                  | 1 |
| <i>circATRNL1</i> | miR-3679-3p                  | 1 |
| <i>circATRNL1</i> | miR-382-5p                   | 2 |
| <i>circATRNL1</i> | miR-3974                     | 1 |

|                   |                  |   |
|-------------------|------------------|---|
| <i>circATRNL1</i> | miR-4261         | 3 |
| <i>circATRNL1</i> | miR-4273/7156-5p | 1 |
| <i>circATRNL1</i> | miR-4314         | 1 |
| <i>circATRNL1</i> | miR-4445-5p      | 1 |
| <i>circATRNL1</i> | miR-4484         | 2 |
| <i>circATRNL1</i> | miR-4509         | 1 |
| <i>circATRNL1</i> | miR-4677-5p      | 1 |
| <i>circATRNL1</i> | miR-4718         | 1 |
| <i>circATRNL1</i> | miR-4738-3p      | 1 |
| <i>circATRNL1</i> | miR-4744         | 1 |
| <i>circATRNL1</i> | miR-4753-3p      | 1 |
| <i>circATRNL1</i> | miR-495-5p       | 2 |
| <i>circATRNL1</i> | miR-4999-5p      | 1 |
| <i>circATRNL1</i> | miR-508-3p       | 1 |
| <i>circATRNL1</i> | miR-5087         | 1 |
| <i>circATRNL1</i> | miR-548an        | 2 |
| <i>circATRNL1</i> | miR-5701         | 2 |
| <i>circATRNL1</i> | miR-5704         | 1 |
| <i>circATRNL1</i> | miR-580-3p       | 1 |
| <i>circATRNL1</i> | miR-625-3p       | 1 |
| <i>circATRNL1</i> | miR-633          | 1 |
| <i>circATRNL1</i> | miR-6510-3p      | 1 |
| <i>circATRNL1</i> | miR-6717-5p      | 2 |
| <i>circATRNL1</i> | miR-6720-5p      | 1 |
| <i>circATRNL1</i> | miR-6768-3p      | 2 |
| <i>circATRNL1</i> | miR-6770-5p      | 2 |
| <i>circATRNL1</i> | miR-6776-5p      | 1 |
| <i>circATRNL1</i> | miR-6817-3p      | 1 |
| <i>circATRNL1</i> | miR-6845-3p      | 1 |
| <i>circATRNL1</i> | miR-6861-5p      | 1 |
| <i>circATRNL1</i> | miR-6873-3p      | 2 |
| <i>circATRNL1</i> | miR-6882-5p      | 2 |
| <i>circATRNL1</i> | miR-7110-3p      | 1 |
| <i>circATRNL1</i> | miR-758-3p       | 1 |
| <i>circATRNL1</i> | miR-7844-5p      | 2 |
| <i>circATRNL1</i> | miR-8053         | 2 |
| <i>circATRNL1</i> | miR-922          | 2 |
| <i>circATRNL1</i> | miR-604          | 1 |

|                   |                       |   |
|-------------------|-----------------------|---|
| <i>circATRNL1</i> | miR-6762-3p           | 1 |
| <i>circATXN7</i>  | let-7a-2-3p/let-7g-3p | 1 |
| <i>circATXN7</i>  | let-7c-3p             | 1 |
| <i>circATXN7</i>  | miR-1-3p/206          | 2 |
| <i>circATXN7</i>  | miR-106a-3p           | 1 |
| <i>circATXN7</i>  | miR-10a-3p            | 1 |
| <i>circATXN7</i>  | miR-1181              | 1 |
| <i>circATXN7</i>  | miR-1199-3p           | 6 |
| <i>circATXN7</i>  | miR-1200              | 1 |
| <i>circATXN7</i>  | miR-1204              | 1 |
| <i>circATXN7</i>  | miR-1208              | 1 |
| <i>circATXN7</i>  | miR-122-3p            | 1 |
| <i>circATXN7</i>  | miR-1227-5p           | 1 |
| <i>circATXN7</i>  | miR-1233-3p           | 1 |
| <i>circATXN7</i>  | miR-1236-5p           | 1 |
| <i>circATXN7</i>  | miR-1243              | 2 |
| <i>circATXN7</i>  | miR-1245a/8079        | 1 |
| <i>circATXN7</i>  | miR-1245b-5p          | 1 |
| <i>circATXN7</i>  | miR-1246              | 1 |
| <i>circATXN7</i>  | miR-1247-3p           | 1 |
| <i>circATXN7</i>  | miR-1247-5p           | 1 |
| <i>circATXN7</i>  | miR-1249-5p/6797-5p   | 8 |
| <i>circATXN7</i>  | miR-125-5p            | 4 |
| <i>circATXN7</i>  | miR-1250-3p           | 1 |
| <i>circATXN7</i>  | miR-1253              | 1 |
| <i>circATXN7</i>  | miR-1254/3116         | 3 |
| <i>circATXN7</i>  | miR-126-3p.2          | 1 |
| <i>circATXN7</i>  | miR-1260a/1260b       | 2 |
| <i>circATXN7</i>  | miR-1273d             | 1 |
| <i>circATXN7</i>  | miR-1276              | 2 |
| <i>circATXN7</i>  | miR-1279              | 1 |
| <i>circATXN7</i>  | miR-1281              | 2 |
| <i>circATXN7</i>  | miR-1288-3p           | 2 |
| <i>circATXN7</i>  | miR-1292-5p           | 1 |
| <i>circATXN7</i>  | miR-1295a             | 1 |
| <i>circATXN7</i>  | miR-1298-5p           | 1 |
| <i>circATXN7</i>  | miR-1299              | 1 |
| <i>circATXN7</i>  | miR-1301-3p           | 1 |

|                  |                     |   |
|------------------|---------------------|---|
| <i>circATXN7</i> | miR-1303            | 1 |
| <i>circATXN7</i> | miR-1306-5p         | 3 |
| <i>circATXN7</i> | miR-1307-5p         | 1 |
| <i>circATXN7</i> | miR-132-5p          | 1 |
| <i>circATXN7</i> | miR-140-3p.1        | 2 |
| <i>circATXN7</i> | miR-146-5p          | 1 |
| <i>circATXN7</i> | miR-1470            | 1 |
| <i>circATXN7</i> | miR-147a            | 1 |
| <i>circATXN7</i> | miR-147b            | 3 |
| <i>circATXN7</i> | miR-150-5p          | 4 |
| <i>circATXN7</i> | miR-153-5p          | 1 |
| <i>circATXN7</i> | miR-1537-3p         | 1 |
| <i>circATXN7</i> | miR-1538/4745-3p    | 5 |
| <i>circATXN7</i> | miR-1539            | 3 |
| <i>circATXN7</i> | miR-181-5p          | 2 |
| <i>circATXN7</i> | miR-181a-2-3p       | 2 |
| <i>circATXN7</i> | miR-1827            | 1 |
| <i>circATXN7</i> | miR-183-3p          | 1 |
| <i>circATXN7</i> | miR-185-5p          | 1 |
| <i>circATXN7</i> | miR-188-3p          | 2 |
| <i>circATXN7</i> | miR-18a-3p          | 1 |
| <i>circATXN7</i> | miR-1908-3p         | 9 |
| <i>circATXN7</i> | miR-1908-5p         | 4 |
| <i>circATXN7</i> | miR-191-3p          | 3 |
| <i>circATXN7</i> | miR-1915-3p/6764-5p | 2 |
| <i>circATXN7</i> | miR-197-5p/3132     | 1 |
| <i>circATXN7</i> | miR-198             | 1 |
| <i>circATXN7</i> | miR-203a-3p.1       | 2 |
| <i>circATXN7</i> | miR-204-5p/211-5p   | 1 |
| <i>circATXN7</i> | miR-208-5p          | 1 |
| <i>circATXN7</i> | miR-210-3p          | 3 |
| <i>circATXN7</i> | miR-2110            | 1 |
| <i>circATXN7</i> | miR-2115-5p         | 1 |
| <i>circATXN7</i> | miR-2116-3p         | 4 |
| <i>circATXN7</i> | miR-224-5p          | 1 |
| <i>circATXN7</i> | miR-2276-3p         | 3 |
| <i>circATXN7</i> | miR-2276-5p         | 1 |
| <i>circATXN7</i> | miR-2277-5p         | 4 |

|                  |                           |   |
|------------------|---------------------------|---|
| <i>circATXN7</i> | miR-2467-3p               | 1 |
| <i>circATXN7</i> | miR-2681-5p               | 2 |
| <i>circATXN7</i> | miR-28-5p/708-5p          | 1 |
| <i>circATXN7</i> | miR-296-5p                | 2 |
| <i>circATXN7</i> | miR-302b-5p/302d-5p       | 1 |
| <i>circATXN7</i> | miR-3123                  | 2 |
| <i>circATXN7</i> | miR-3124-3p               | 2 |
| <i>circATXN7</i> | miR-3124-5p               | 2 |
| <i>circATXN7</i> | miR-3126-5p               | 1 |
| <i>circATXN7</i> | miR-3141                  | 2 |
| <i>circATXN7</i> | miR-3150a-3p              | 1 |
| <i>circATXN7</i> | miR-3150b-3p              | 2 |
| <i>circATXN7</i> | miR-3151-3p               | 1 |
| <i>circATXN7</i> | miR-3156-3p               | 2 |
| <i>circATXN7</i> | miR-3165                  | 1 |
| <i>circATXN7</i> | miR-3169                  | 1 |
| <i>circATXN7</i> | miR-3177-5p               | 1 |
| <i>circATXN7</i> | miR-3183/4723-3p/6769b-3p | 1 |
| <i>circATXN7</i> | miR-3189-5p               | 2 |
| <i>circATXN7</i> | miR-3192-3p               | 1 |
| <i>circATXN7</i> | miR-3195                  | 2 |
| <i>circATXN7</i> | miR-3197                  | 2 |
| <i>circATXN7</i> | miR-32-3p                 | 1 |
| <i>circATXN7</i> | miR-320                   | 1 |
| <i>circATXN7</i> | miR-3200-5p               | 1 |
| <i>circATXN7</i> | miR-324-3p/1913           | 1 |
| <i>circATXN7</i> | miR-324-5p                | 1 |
| <i>circATXN7</i> | miR-331-3p                | 2 |
| <i>circATXN7</i> | miR-338-3p                | 2 |
| <i>circATXN7</i> | miR-34b-3p                | 4 |
| <i>circATXN7</i> | miR-34c-3p                | 4 |
| <i>circATXN7</i> | miR-3607-5p               | 1 |
| <i>circATXN7</i> | miR-3611                  | 1 |
| <i>circATXN7</i> | miR-3612                  | 2 |
| <i>circATXN7</i> | miR-3613-3p               | 1 |
| <i>circATXN7</i> | miR-3614-5p               | 1 |
| <i>circATXN7</i> | miR-3621                  | 4 |
| <i>circATXN7</i> | miR-3622a-5p              | 1 |

|                  |                           |    |
|------------------|---------------------------|----|
| <i>circATXN7</i> | miR-3648                  | 3  |
| <i>circATXN7</i> | miR-3654                  | 2  |
| <i>circATXN7</i> | miR-3656                  | 4  |
| <i>circATXN7</i> | miR-3667-3p               | 3  |
| <i>circATXN7</i> | miR-3680-3p               | 1  |
| <i>circATXN7</i> | miR-3687/4442             | 1  |
| <i>circATXN7</i> | miR-3691-3p               | 2  |
| <i>circATXN7</i> | miR-3692-3p               | 2  |
| <i>circATXN7</i> | miR-3692-5p               | 11 |
| <i>circATXN7</i> | miR-377-3p                | 1  |
| <i>circATXN7</i> | miR-378a-5p               | 1  |
| <i>circATXN7</i> | miR-378g                  | 1  |
| <i>circATXN7</i> | miR-381-5p                | 1  |
| <i>circATXN7</i> | miR-383-5p.1              | 1  |
| <i>circATXN7</i> | miR-383-5p.2              | 1  |
| <i>circATXN7</i> | miR-3907                  | 1  |
| <i>circATXN7</i> | miR-3909                  | 1  |
| <i>circATXN7</i> | miR-3918                  | 2  |
| <i>circATXN7</i> | miR-3920                  | 2  |
| <i>circATXN7</i> | miR-3925-5p               | 2  |
| <i>circATXN7</i> | miR-3926                  | 1  |
| <i>circATXN7</i> | miR-3928-5p/6806-3p       | 1  |
| <i>circATXN7</i> | miR-3943                  | 2  |
| <i>circATXN7</i> | miR-3960/8072             | 7  |
| <i>circATXN7</i> | miR-4257                  | 1  |
| <i>circATXN7</i> | miR-4258                  | 4  |
| <i>circATXN7</i> | miR-4268                  | 4  |
| <i>circATXN7</i> | miR-4271/4725-3p/6780b-5p | 1  |
| <i>circATXN7</i> | miR-4276                  | 1  |
| <i>circATXN7</i> | miR-4281                  | 4  |
| <i>circATXN7</i> | miR-4283                  | 1  |
| <i>circATXN7</i> | miR-4285                  | 1  |
| <i>circATXN7</i> | miR-4287/4685-3p          | 2  |
| <i>circATXN7</i> | miR-4301                  | 1  |
| <i>circATXN7</i> | miR-4302                  | 1  |
| <i>circATXN7</i> | miR-4310/7157-5p          | 2  |
| <i>circATXN7</i> | miR-4311                  | 2  |
| <i>circATXN7</i> | miR-4313                  | 2  |



|                  |                                              |   |
|------------------|----------------------------------------------|---|
| <i>circATXN7</i> | miR-4317                                     | 1 |
| <i>circATXN7</i> | miR-4318                                     | 1 |
| <i>circATXN7</i> | miR-4323                                     | 2 |
| <i>circATXN7</i> | miR-4327                                     | 1 |
| <i>circATXN7</i> | miR-4419a/4510/6127/6129/6130/6133           | 1 |
| <i>circATXN7</i> | miR-4433a-5p                                 | 1 |
| <i>circATXN7</i> | miR-4433b-5p                                 | 2 |
| <i>circATXN7</i> | miR-4436b-3p/4632-5p/6735-5p/6879-5p/7843-5p |   |
| <i>circATXN7</i> | miR-4443                                     | 4 |
| <i>circATXN7</i> | miR-4446-5p                                  | 3 |
| <i>circATXN7</i> | miR-4448                                     | 4 |
| <i>circATXN7</i> | miR-4449                                     | 1 |
| <i>circATXN7</i> | miR-4452                                     | 1 |
| <i>circATXN7</i> | miR-4467                                     | 7 |
| <i>circATXN7</i> | miR-4469                                     | 2 |
| <i>circATXN7</i> | miR-4471/8059                                | 1 |
| <i>circATXN7</i> | miR-4476/6876-5p                             | 1 |
| <i>circATXN7</i> | miR-4479                                     | 4 |
| <i>circATXN7</i> | miR-4485-5p                                  | 1 |
| <i>circATXN7</i> | miR-4486                                     | 1 |
| <i>circATXN7</i> | miR-4489                                     | 1 |
| <i>circATXN7</i> | miR-4503                                     | 1 |
| <i>circATXN7</i> | miR-450b-5p                                  | 1 |
| <i>circATXN7</i> | miR-4515                                     | 2 |
| <i>circATXN7</i> | miR-452-3p                                   | 2 |
| <i>circATXN7</i> | miR-4523                                     | 1 |
| <i>circATXN7</i> | miR-4530                                     | 2 |
| <i>circATXN7</i> | miR-4532                                     | 1 |
| <i>circATXN7</i> | miR-4537                                     | 1 |
| <i>circATXN7</i> | miR-4632-3p                                  | 8 |
| <i>circATXN7</i> | miR-4634                                     | 2 |
| <i>circATXN7</i> | miR-4635                                     | 2 |
| <i>circATXN7</i> | miR-4649-5p/6729-5p                          | 1 |
| <i>circATXN7</i> | miR-4652-3p                                  | 1 |
| <i>circATXN7</i> | miR-4656                                     | 2 |
| <i>circATXN7</i> | miR-466                                      | 1 |
| <i>circATXN7</i> | miR-4660                                     | 1 |
| <i>circATXN7</i> | miR-4665-3p                                  | 1 |

|                  |                          |   |
|------------------|--------------------------|---|
| <i>circATXN7</i> | miR-4667-3p              | 1 |
| <i>circATXN7</i> | miR-4667-5p/4700-5p/8089 | 5 |
| <i>circATXN7</i> | miR-4668-3p              | 2 |
| <i>circATXN7</i> | miR-4670-3p              | 2 |
| <i>circATXN7</i> | miR-4675/4741            | 2 |
| <i>circATXN7</i> | miR-4685-5p/6837-5p      | 2 |
| <i>circATXN7</i> | miR-4686                 | 4 |
| <i>circATXN7</i> | miR-4691-3p              | 1 |
| <i>circATXN7</i> | miR-4691-5p/6792-3p      | 2 |
| <i>circATXN7</i> | miR-4693-3p              | 4 |
| <i>circATXN7</i> | miR-4699-3p              | 1 |
| <i>circATXN7</i> | miR-4707-3p              | 5 |
| <i>circATXN7</i> | miR-4707-5p              | 2 |
| <i>circATXN7</i> | miR-4711-5p              | 1 |
| <i>circATXN7</i> | miR-4712-3p              | 1 |
| <i>circATXN7</i> | miR-4717-3p              | 1 |
| <i>circATXN7</i> | miR-4717-5p              | 1 |
| <i>circATXN7</i> | miR-4724-3p              | 2 |
| <i>circATXN7</i> | miR-4726-3p              | 2 |
| <i>circATXN7</i> | miR-4730                 | 2 |
| <i>circATXN7</i> | miR-4731-5p              | 2 |
| <i>circATXN7</i> | miR-4732-3p              | 4 |
| <i>circATXN7</i> | miR-4734                 | 3 |
| <i>circATXN7</i> | miR-4737                 | 1 |
| <i>circATXN7</i> | miR-4738-3p              | 1 |
| <i>circATXN7</i> | miR-4740-5p              | 2 |
| <i>circATXN7</i> | miR-4743-3p              | 1 |
| <i>circATXN7</i> | miR-4743-5p              | 3 |
| <i>circATXN7</i> | miR-4746-3p              | 3 |
| <i>circATXN7</i> | miR-4746-5p              | 1 |
| <i>circATXN7</i> | miR-4754                 | 1 |
| <i>circATXN7</i> | miR-4755-3p              | 1 |
| <i>circATXN7</i> | miR-4758-3p              | 2 |
| <i>circATXN7</i> | miR-4759                 | 1 |
| <i>circATXN7</i> | miR-4761-3p              | 1 |
| <i>circATXN7</i> | miR-4763-5p              | 2 |
| <i>circATXN7</i> | miR-4765                 | 1 |
| <i>circATXN7</i> | miR-4772-3p              | 3 |

|                  |                                                                  |   |
|------------------|------------------------------------------------------------------|---|
| <i>circATXN7</i> | miR-4772-5p                                                      | 1 |
| <i>circATXN7</i> | miR-4773                                                         | 1 |
| <i>circATXN7</i> | miR-4778-5p                                                      | 1 |
| <i>circATXN7</i> | miR-4782-5p/5706                                                 | 1 |
| <i>circATXN7</i> | miR-4786-3p                                                      | 1 |
| <i>circATXN7</i> | miR-4790-3p                                                      | 1 |
| <i>circATXN7</i> | miR-4795-5p                                                      | 1 |
| <i>circATXN7</i> | miR-4797-5p                                                      | 1 |
| <i>circATXN7</i> | miR-4802-5p                                                      | 2 |
| <i>circATXN7</i> | miR-483-3p.1                                                     | 2 |
| <i>circATXN7</i> | miR-488-3p                                                       | 1 |
| <i>circATXN7</i> | miR-493-5p                                                       | 1 |
| <i>circATXN7</i> | miR-494-3p                                                       | 1 |
| <i>circATXN7</i> | miR-495-3p                                                       | 1 |
| <i>circATXN7</i> | miR-497-3p                                                       | 1 |
| <i>circATXN7</i> | miR-5000-3p                                                      | 2 |
| <i>circATXN7</i> | miR-5008-3p/6737-3p/7157-3p                                      | 2 |
| <i>circATXN7</i> | miR-5008-5p                                                      | 1 |
| <i>circATXN7</i> | miR-500a-5p                                                      | 1 |
| <i>circATXN7</i> | miR-502-5p                                                       | 1 |
| <i>circATXN7</i> | miR-505-5p                                                       | 1 |
| <i>circATXN7</i> | miR-507/557                                                      | 1 |
| <i>circATXN7</i> | miR-5091                                                         | 1 |
| <i>circATXN7</i> | miR-5093                                                         | 1 |
| <i>circATXN7</i> | miR-5094                                                         | 1 |
| <i>circATXN7</i> | miR-510-3p                                                       | 2 |
| <i>circATXN7</i> | miR-511-3p                                                       | 2 |
| <i>circATXN7</i> | miR-516a-3p/516b-3p/7162-5p                                      | 1 |
| <i>circATXN7</i> | miR-516b-5p                                                      | 1 |
| <i>circATXN7</i> | miR-5192                                                         | 1 |
| <i>circATXN7</i> | miR-5193                                                         | 1 |
| <i>circATXN7</i> | miR-532-3p                                                       | 4 |
| <i>circATXN7</i> | miR-548ao-5p/548ax                                               | 1 |
| <i>circATXN7</i> | miR-548av-5p/548k/8054                                           | 1 |
| <i>circATXN7</i> | miR-548ay-5p/548au-5p/548as-5p/548ar-5p/548aq-5p/548ap-5p/548am- |   |
| <i>circATXN7</i> | miR-548az-5p/548t-5p                                             | 1 |
| <i>circATXN7</i> | miR-548c-3p                                                      | 2 |
| <i>circATXN7</i> | miR-548g-3p                                                      | 1 |

|                  |                 |   |
|------------------|-----------------|---|
| <i>circATXN7</i> | miR-548l        | 1 |
| <i>circATXN7</i> | miR-548n        | 1 |
| <i>circATXN7</i> | miR-548p        | 1 |
| <i>circATXN7</i> | miR-550b-2-5p   | 1 |
| <i>circATXN7</i> | miR-552-5p      | 1 |
| <i>circATXN7</i> | miR-5571-5p     | 1 |
| <i>circATXN7</i> | miR-5580-3p     | 1 |
| <i>circATXN7</i> | miR-5582-5p     | 1 |
| <i>circATXN7</i> | miR-5584-5p     | 1 |
| <i>circATXN7</i> | miR-5585-5p     | 1 |
| <i>circATXN7</i> | miR-5586-3p     | 2 |
| <i>circATXN7</i> | miR-5587-3p     | 2 |
| <i>circATXN7</i> | miR-5589-5p     | 2 |
| <i>circATXN7</i> | miR-566         | 1 |
| <i>circATXN7</i> | miR-5683        | 1 |
| <i>circATXN7</i> | miR-5694        | 1 |
| <i>circATXN7</i> | miR-5696        | 1 |
| <i>circATXN7</i> | miR-5699-5p     | 2 |
| <i>circATXN7</i> | miR-5700        | 1 |
| <i>circATXN7</i> | miR-5704        | 1 |
| <i>circATXN7</i> | miR-572         | 2 |
| <i>circATXN7</i> | miR-5739        | 1 |
| <i>circATXN7</i> | miR-575/4676-5p | 1 |
| <i>circATXN7</i> | miR-579-3p      | 1 |
| <i>circATXN7</i> | miR-579-5p      | 1 |
| <i>circATXN7</i> | miR-583         | 2 |
| <i>circATXN7</i> | miR-589-5p      | 1 |
| <i>circATXN7</i> | miR-593-5p      | 2 |
| <i>circATXN7</i> | miR-598-3p      | 3 |
| <i>circATXN7</i> | miR-604         | 3 |
| <i>circATXN7</i> | miR-605-5p      | 1 |
| <i>circATXN7</i> | miR-6071        | 1 |
| <i>circATXN7</i> | miR-6075        | 4 |
| <i>circATXN7</i> | miR-6078        | 1 |
| <i>circATXN7</i> | miR-6079        | 5 |
| <i>circATXN7</i> | miR-6084        | 2 |
| <i>circATXN7</i> | miR-6087        | 2 |
| <i>circATXN7</i> | miR-6089        | 1 |

|                  |                                      |   |
|------------------|--------------------------------------|---|
| <i>circATXN7</i> | miR-612/1285-3p/3187-5p/5189-5p/6860 | 1 |
| <i>circATXN7</i> | miR-6128                             | 1 |
| <i>circATXN7</i> | miR-6134                             | 1 |
| <i>circATXN7</i> | miR-615-3p                           | 1 |
| <i>circATXN7</i> | miR-617                              | 1 |
| <i>circATXN7</i> | miR-623                              | 1 |
| <i>circATXN7</i> | miR-624-5p                           | 1 |
| <i>circATXN7</i> | miR-627-3p                           | 3 |
| <i>circATXN7</i> | miR-637                              | 5 |
| <i>circATXN7</i> | miR-642a-5p                          | 2 |
| <i>circATXN7</i> | miR-648                              | 1 |
| <i>circATXN7</i> | miR-6499-5p                          | 1 |
| <i>circATXN7</i> | miR-6500-3p                          | 1 |
| <i>circATXN7</i> | miR-6501-3p                          | 1 |
| <i>circATXN7</i> | miR-6505-3p                          | 1 |
| <i>circATXN7</i> | miR-6514-5p                          | 2 |
| <i>circATXN7</i> | miR-6515-5p                          | 4 |
| <i>circATXN7</i> | miR-652-5p                           | 1 |
| <i>circATXN7</i> | miR-653-5p                           | 2 |
| <i>circATXN7</i> | miR-658                              | 2 |
| <i>circATXN7</i> | miR-660-3p                           | 1 |
| <i>circATXN7</i> | miR-661                              | 3 |
| <i>circATXN7</i> | miR-664a-3p                          | 2 |
| <i>circATXN7</i> | miR-668-5p                           | 1 |
| <i>circATXN7</i> | miR-671-5p                           | 1 |
| <i>circATXN7</i> | miR-6715a-3p                         | 1 |
| <i>circATXN7</i> | miR-6716-5p                          | 1 |
| <i>circATXN7</i> | miR-6720-3p                          | 1 |
| <i>circATXN7</i> | miR-6720-5p                          | 1 |
| <i>circATXN7</i> | miR-6721-5p                          | 2 |
| <i>circATXN7</i> | miR-6729-3p                          | 1 |
| <i>circATXN7</i> | miR-6733-3p                          | 1 |
| <i>circATXN7</i> | miR-6734-3p                          | 3 |
| <i>circATXN7</i> | miR-6735-3p                          | 2 |
| <i>circATXN7</i> | miR-6736-3p                          | 1 |
| <i>circATXN7</i> | miR-6740-5p                          | 1 |
| <i>circATXN7</i> | miR-6741-3p                          | 6 |
| <i>circATXN7</i> | miR-6742-3p                          | 1 |

|                  |                     |   |
|------------------|---------------------|---|
| <i>circATXN7</i> | miR-6743-3p         | 4 |
| <i>circATXN7</i> | miR-6749-3p         | 2 |
| <i>circATXN7</i> | miR-6749-5p         | 2 |
| <i>circATXN7</i> | miR-6750-5p/6822-5p | 1 |
| <i>circATXN7</i> | miR-6755-5p         | 1 |
| <i>circATXN7</i> | miR-6757-3p         | 1 |
| <i>circATXN7</i> | miR-6758-5p/6856-5p | 1 |
| <i>circATXN7</i> | miR-676-5p          | 1 |
| <i>circATXN7</i> | miR-6760-3p         | 1 |
| <i>circATXN7</i> | miR-6762-3p         | 3 |
| <i>circATXN7</i> | miR-6763-3p         | 2 |
| <i>circATXN7</i> | miR-6769a-3p        | 2 |
| <i>circATXN7</i> | miR-6770-3p         | 2 |
| <i>circATXN7</i> | miR-6770-5p         | 1 |
| <i>circATXN7</i> | miR-6772-3p         | 2 |
| <i>circATXN7</i> | miR-6778-3p         | 2 |
| <i>circATXN7</i> | miR-6786-3p         | 1 |
| <i>circATXN7</i> | miR-6786-5p         | 3 |
| <i>circATXN7</i> | miR-6787-3p         | 1 |
| <i>circATXN7</i> | miR-6788-3p         | 1 |
| <i>circATXN7</i> | miR-6789-3p         | 1 |
| <i>circATXN7</i> | miR-6791-3p/6829-3p | 2 |
| <i>circATXN7</i> | miR-6793-3p         | 2 |
| <i>circATXN7</i> | miR-6796-3p         | 1 |
| <i>circATXN7</i> | miR-6801-3p/6810-3p | 2 |
| <i>circATXN7</i> | miR-6802-3p         | 1 |
| <i>circATXN7</i> | miR-6804-5p         | 6 |
| <i>circATXN7</i> | miR-6806-5p         | 1 |
| <i>circATXN7</i> | miR-6810-5p         | 1 |
| <i>circATXN7</i> | miR-6814-5p         | 1 |
| <i>circATXN7</i> | miR-6815-5p/6865-5p | 2 |
| <i>circATXN7</i> | miR-6818-5p         | 1 |
| <i>circATXN7</i> | miR-6819-3p/6877-3p | 2 |
| <i>circATXN7</i> | miR-6820-5p         | 1 |
| <i>circATXN7</i> | miR-6828-3p         | 1 |
| <i>circATXN7</i> | miR-6828-5p         | 1 |
| <i>circATXN7</i> | miR-6829-5p         | 2 |
| <i>circATXN7</i> | miR-6840-3p         | 2 |

|                  |                           |   |
|------------------|---------------------------|---|
| <i>circATXN7</i> | miR-6840-5p               | 2 |
| <i>circATXN7</i> | miR-6841-5p               | 1 |
| <i>circATXN7</i> | miR-6844                  | 1 |
| <i>circATXN7</i> | miR-6847-5p               | 1 |
| <i>circATXN7</i> | miR-6850-3p               | 6 |
| <i>circATXN7</i> | miR-6850-5p               | 1 |
| <i>circATXN7</i> | miR-6852-5p               | 1 |
| <i>circATXN7</i> | miR-6857-5p               | 1 |
| <i>circATXN7</i> | miR-6858-3p               | 1 |
| <i>circATXN7</i> | miR-6866-5p               | 1 |
| <i>circATXN7</i> | miR-6868-3p               | 3 |
| <i>circATXN7</i> | miR-6869-3p               | 3 |
| <i>circATXN7</i> | miR-6874-5p               | 1 |
| <i>circATXN7</i> | miR-6880-5p               | 1 |
| <i>circATXN7</i> | miR-6882-3p               | 3 |
| <i>circATXN7</i> | miR-6888-3p               | 1 |
| <i>circATXN7</i> | miR-6888-5p               | 1 |
| <i>circATXN7</i> | miR-6889-3p               | 2 |
| <i>circATXN7</i> | miR-6892-3p               | 1 |
| <i>circATXN7</i> | miR-6894-5p               | 2 |
| <i>circATXN7</i> | miR-7106-3p               | 4 |
| <i>circATXN7</i> | miR-7108-3p               | 4 |
| <i>circATXN7</i> | miR-7109-3p               | 1 |
| <i>circATXN7</i> | miR-7112-3p               | 1 |
| <i>circATXN7</i> | miR-7113-3p               | 2 |
| <i>circATXN7</i> | miR-7113-5p               | 2 |
| <i>circATXN7</i> | miR-7154-3p               | 2 |
| <i>circATXN7</i> | miR-7155-5p               | 5 |
| <i>circATXN7</i> | miR-7156-3p               | 1 |
| <i>circATXN7</i> | miR-718                   | 2 |
| <i>circATXN7</i> | miR-758-3p                | 1 |
| <i>circATXN7</i> | miR-762/4492/4498/5001-5p | 2 |
| <i>circATXN7</i> | miR-765                   | 2 |
| <i>circATXN7</i> | miR-766-5p                | 2 |
| <i>circATXN7</i> | miR-767-3p                | 2 |
| <i>circATXN7</i> | miR-767-5p                | 1 |
| <i>circATXN7</i> | miR-770-5p                | 1 |
| <i>circATXN7</i> | miR-7846-3p               | 1 |

|                  |                   |    |
|------------------|-------------------|----|
| <i>circATXN7</i> | miR-7847-3p       | 1  |
| <i>circATXN7</i> | miR-7850-5p       | 2  |
| <i>circATXN7</i> | miR-7854-3p       | 1  |
| <i>circATXN7</i> | miR-7977          | 2  |
| <i>circATXN7</i> | miR-8062          | 1  |
| <i>circATXN7</i> | miR-8071          | 1  |
| <i>circATXN7</i> | miR-8083          | 1  |
| <i>circATXN7</i> | miR-873-5p.1      | 2  |
| <i>circATXN7</i> | miR-874-5p        | 1  |
| <i>circATXN7</i> | miR-875-3p        | 1  |
| <i>circATXN7</i> | miR-877-3p        | 1  |
| <i>circATXN7</i> | miR-877-5p        | 1  |
| <i>circATXN7</i> | miR-885-3p        | 1  |
| <i>circATXN7</i> | miR-892a          | 1  |
| <i>circATXN7</i> | miR-9-5p          | 1  |
| <i>circATXN7</i> | miR-93-3p         | 11 |
| <i>circATXN7</i> | miR-933           | 2  |
| <i>circATXN7</i> | miR-937-3p        | 3  |
| <i>circATXN7</i> | miR-939-3p        | 1  |
| <i>circATXN7</i> | miR-941           | 1  |
| <i>circATXN7</i> | miR-9500          | 1  |
| <i>circATXN7</i> | miR-99-3p         | 1  |
| <i>circATXN7</i> | miR-99-5p/100-5p  | 1  |
| <i>circATXN7</i> | miR-101-3p.2      | 2  |
| <i>circATXN7</i> | miR-103-3p/107    | 1  |
| <i>circATXN7</i> | miR-1228-3p       | 1  |
| <i>circATXN7</i> | miR-1287-5p       | 1  |
| <i>circATXN7</i> | miR-141-5p        | 2  |
| <i>circATXN7</i> | miR-1587/3620-5p  | 1  |
| <i>circATXN7</i> | miR-182-5p        | 1  |
| <i>circATXN7</i> | miR-2681-3p       | 1  |
| <i>circATXN7</i> | miR-3135b         | 1  |
| <i>circATXN7</i> | miR-329-3p/362-3p | 1  |
| <i>circATXN7</i> | miR-3622b-5p      | 1  |
| <i>circATXN7</i> | miR-365-3p        | 1  |
| <i>circATXN7</i> | miR-3652/4430     | 1  |
| <i>circATXN7</i> | miR-378-3p        | 3  |
| <i>circATXN7</i> | miR-3941          | 1  |



|                  |                   |   |
|------------------|-------------------|---|
| <i>circATXN7</i> | miR-411-5p.1      | 1 |
| <i>circATXN7</i> | miR-4501          | 1 |
| <i>circATXN7</i> | miR-4505/5787     | 1 |
| <i>circATXN7</i> | miR-4520-3p       | 3 |
| <i>circATXN7</i> | miR-4638-3p       | 3 |
| <i>circATXN7</i> | miR-4642          | 1 |
| <i>circATXN7</i> | miR-4672          | 1 |
| <i>circATXN7</i> | miR-4674          | 1 |
| <i>circATXN7</i> | miR-4714-3p       | 1 |
| <i>circATXN7</i> | miR-490-3p        | 1 |
| <i>circATXN7</i> | miR-5087          | 1 |
| <i>circATXN7</i> | miR-511-5p        | 1 |
| <i>circATXN7</i> | miR-514a-3p       | 1 |
| <i>circATXN7</i> | miR-532-5p        | 1 |
| <i>circATXN7</i> | miR-549a          | 1 |
| <i>circATXN7</i> | miR-551b-5p       | 1 |
| <i>circATXN7</i> | miR-562           | 1 |
| <i>circATXN7</i> | miR-5680          | 1 |
| <i>circATXN7</i> | miR-5697          | 1 |
| <i>circATXN7</i> | miR-582-5p        | 2 |
| <i>circATXN7</i> | miR-600           | 1 |
| <i>circATXN7</i> | miR-603           | 1 |
| <i>circATXN7</i> | miR-649           | 1 |
| <i>circATXN7</i> | miR-6504-3p       | 1 |
| <i>circATXN7</i> | miR-6514-3p       | 1 |
| <i>circATXN7</i> | miR-654-3p        | 1 |
| <i>circATXN7</i> | miR-6740-3p       | 1 |
| <i>circATXN7</i> | miR-6894-3p       | 1 |
| <i>circATXN7</i> | miR-8066          | 4 |
| <i>circATXN7</i> | miR-8070          | 1 |
| <i>circATXN7</i> | miR-8485          | 1 |
| <i>circATXN7</i> | miR-96-3p         | 1 |
| <i>circATXN7</i> | miR-96-5p/1271-5p | 1 |
| <i>circATXN7</i> | miR-1-5p          | 2 |
| <i>circATXN7</i> | miR-10-5p         | 3 |
| <i>circATXN7</i> | miR-101-3p.1      | 2 |
| <i>circATXN7</i> | miR-103a-2-5p     | 2 |
| <i>circATXN7</i> | miR-103b          | 3 |

|                  |                          |   |
|------------------|--------------------------|---|
| <i>circATXN7</i> | miR-105-3p               | 3 |
| <i>circATXN7</i> | miR-105-5p               | 2 |
| <i>circATXN7</i> | miR-10b-3p               | 4 |
| <i>circATXN7</i> | miR-1178-5p              | 1 |
| <i>circATXN7</i> | miR-1182                 | 1 |
| <i>circATXN7</i> | miR-1185-5p              | 1 |
| <i>circATXN7</i> | miR-1199-5p/6751-3p      | 2 |
| <i>circATXN7</i> | miR-1203                 | 1 |
| <i>circATXN7</i> | miR-1207-5p/4763-3p      | 2 |
| <i>circATXN7</i> | miR-1224-3p              | 1 |
| <i>circATXN7</i> | miR-1224-5p              | 1 |
| <i>circATXN7</i> | miR-1225-3p              | 2 |
| <i>circATXN7</i> | miR-1226-5p              | 6 |
| <i>circATXN7</i> | miR-1233-5p/6778-5p      | 2 |
| <i>circATXN7</i> | miR-1236-3p              | 3 |
| <i>circATXN7</i> | miR-1237-5p/4488/4697-5p | 1 |
| <i>circATXN7</i> | miR-1245b-3p             | 2 |
| <i>circATXN7</i> | miR-1249-3p              | 1 |
| <i>circATXN7</i> | miR-1251-3p              | 4 |
| <i>circATXN7</i> | miR-1252-5p              | 4 |
| <i>circATXN7</i> | miR-1255a/1255b-5p       | 1 |
| <i>circATXN7</i> | miR-1261                 | 1 |
| <i>circATXN7</i> | miR-1264                 | 2 |
| <i>circATXN7</i> | miR-1265                 | 1 |
| <i>circATXN7</i> | miR-1269                 | 1 |
| <i>circATXN7</i> | miR-127-5p               | 1 |
| <i>circATXN7</i> | miR-1270                 | 1 |
| <i>circATXN7</i> | miR-1272                 | 1 |
| <i>circATXN7</i> | miR-1273e                | 1 |
| <i>circATXN7</i> | miR-1273f                | 1 |
| <i>circATXN7</i> | miR-1273g-5p             | 3 |
| <i>circATXN7</i> | miR-1275/4665-5p         | 5 |
| <i>circATXN7</i> | miR-128-3p               | 2 |
| <i>circATXN7</i> | miR-1283                 | 4 |
| <i>circATXN7</i> | miR-1289                 | 2 |
| <i>circATXN7</i> | miR-129-3p               | 4 |
| <i>circATXN7</i> | miR-129-5p               | 3 |
| <i>circATXN7</i> | miR-1294                 | 8 |

|                  |                                    |   |
|------------------|------------------------------------|---|
| <i>circATXN7</i> | miR-1304-3p                        | 1 |
| <i>circATXN7</i> | miR-1304-5p                        | 2 |
| <i>circATXN7</i> | miR-1305                           | 1 |
| <i>circATXN7</i> | miR-1307-3p                        | 3 |
| <i>circATXN7</i> | miR-1322                           | 1 |
| <i>circATXN7</i> | miR-1323                           | 1 |
| <i>circATXN7</i> | miR-136-3p                         | 1 |
| <i>circATXN7</i> | miR-139-3p                         | 1 |
| <i>circATXN7</i> | miR-140-5p                         | 3 |
| <i>circATXN7</i> | miR-143-3p                         | 1 |
| <i>circATXN7</i> | miR-144-3p                         | 2 |
| <i>circATXN7</i> | miR-145-5p                         | 1 |
| <i>circATXN7</i> | miR-1468-3p                        | 2 |
| <i>circATXN7</i> | miR-146a-3p                        | 5 |
| <i>circATXN7</i> | miR-146b-3p                        | 4 |
| <i>circATXN7</i> | miR-149-3p/4728-5p/6785-5p/6883-5p | 1 |
| <i>circATXN7</i> | miR-149-5p                         | 4 |
| <i>circATXN7</i> | miR-152-5p                         | 1 |
| <i>circATXN7</i> | miR-15b-3p                         | 7 |
| <i>circATXN7</i> | miR-16-1-3p                        | 2 |
| <i>circATXN7</i> | miR-18-5p                          | 2 |
| <i>circATXN7</i> | miR-181-3p/4420                    | 1 |
| <i>circATXN7</i> | miR-19-3p                          | 2 |
| <i>circATXN7</i> | miR-19-5p                          | 7 |
| <i>circATXN7</i> | miR-190-5p                         | 2 |
| <i>circATXN7</i> | miR-1909-3p/6722-3p                | 2 |
| <i>circATXN7</i> | miR-1910-3p/6511a-5p               | 1 |
| <i>circATXN7</i> | miR-1910-5p                        | 1 |
| <i>circATXN7</i> | miR-1911-5p                        | 1 |
| <i>circATXN7</i> | miR-1914-5p                        | 4 |
| <i>circATXN7</i> | miR-1915-5p                        | 1 |
| <i>circATXN7</i> | miR-192-5p/215-5p                  | 1 |
| <i>circATXN7</i> | miR-193-3p                         | 1 |
| <i>circATXN7</i> | miR-193b-5p                        | 4 |
| <i>circATXN7</i> | miR-194-3p                         | 1 |
| <i>circATXN7</i> | miR-196b-3p                        | 3 |
| <i>circATXN7</i> | miR-1976                           | 4 |
| <i>circATXN7</i> | miR-202-3p                         | 2 |

|                  |                                              |   |
|------------------|----------------------------------------------|---|
| <i>circATXN7</i> | miR-202-5p                                   | 2 |
| <i>circATXN7</i> | miR-203a-5p                                  | 3 |
| <i>circATXN7</i> | miR-205-5p                                   | 1 |
| <i>circATXN7</i> | miR-2052                                     | 7 |
| <i>circATXN7</i> | miR-2113                                     | 3 |
| <i>circATXN7</i> | miR-2114-3p                                  | 2 |
| <i>circATXN7</i> | miR-212-5p                                   | 4 |
| <i>circATXN7</i> | miR-217                                      | 1 |
| <i>circATXN7</i> | miR-218-5p                                   | 4 |
| <i>circATXN7</i> | miR-219a-1-3p                                | 2 |
| <i>circATXN7</i> | miR-219b-5p                                  | 1 |
| <i>circATXN7</i> | miR-221-3p/222-3p                            | 4 |
| <i>circATXN7</i> | miR-221-5p/8073                              | 2 |
| <i>circATXN7</i> | miR-2277-3p                                  | 3 |
| <i>circATXN7</i> | miR-24-3p                                    | 1 |
| <i>circATXN7</i> | miR-24-5p                                    | 1 |
| <i>circATXN7</i> | miR-2467-5p                                  | 4 |
| <i>circATXN7</i> | miR-2682-3p/6781-3p                          | 4 |
| <i>circATXN7</i> | miR-2861                                     | 2 |
| <i>circATXN7</i> | miR-296-3p                                   | 5 |
| <i>circATXN7</i> | miR-299-5p                                   | 8 |
| <i>circATXN7</i> | miR-29b-1-5p                                 | 1 |
| <i>circATXN7</i> | miR-29b-2-5p                                 | 3 |
| <i>circATXN7</i> | miR-301a-5p/301b-5p                          | 3 |
| <i>circATXN7</i> | miR-302a-5p                                  | 2 |
| <i>circATXN7</i> | miR-3064-5p                                  | 1 |
| <i>circATXN7</i> | miR-30b-3p/1273h-5p/3689-3p/6779-5p/6780a-5p | 2 |
| <i>circATXN7</i> | miR-30c-3p/6788-5p                           | 2 |
| <i>circATXN7</i> | miR-3119                                     | 4 |
| <i>circATXN7</i> | miR-3120-3p                                  | 2 |
| <i>circATXN7</i> | miR-3127-5p                                  | 1 |
| <i>circATXN7</i> | miR-3128                                     | 1 |
| <i>circATXN7</i> | miR-3135a                                    | 1 |
| <i>circATXN7</i> | miR-3140-5p                                  | 1 |
| <i>circATXN7</i> | miR-3148                                     | 1 |
| <i>circATXN7</i> | miR-3153/6733-5p/6739-5p                     | 1 |
| <i>circATXN7</i> | miR-3173-3p/6891-5p                          | 1 |
| <i>circATXN7</i> | miR-3173-5p                                  | 4 |

|                  |                       |   |
|------------------|-----------------------|---|
| <i>circATXN7</i> | miR-3174              | 2 |
| <i>circATXN7</i> | miR-3175              | 1 |
| <i>circATXN7</i> | miR-3178              | 2 |
| <i>circATXN7</i> | miR-3180-3p           | 4 |
| <i>circATXN7</i> | miR-3184-3p           | 2 |
| <i>circATXN7</i> | miR-3188              | 4 |
| <i>circATXN7</i> | miR-3189-3p           | 4 |
| <i>circATXN7</i> | miR-3191-5p           | 2 |
| <i>circATXN7</i> | miR-3198/4309         | 2 |
| <i>circATXN7</i> | miR-3200-3p           | 4 |
| <i>circATXN7</i> | miR-3202              | 4 |
| <i>circATXN7</i> | miR-320e              | 1 |
| <i>circATXN7</i> | miR-323a-5p           | 3 |
| <i>circATXN7</i> | miR-326               | 1 |
| <i>circATXN7</i> | miR-329-5p            | 6 |
| <i>circATXN7</i> | miR-33-5p             | 2 |
| <i>circATXN7</i> | miR-330-3p.2          | 1 |
| <i>circATXN7</i> | miR-335-3p            | 2 |
| <i>circATXN7</i> | miR-335-5p            | 1 |
| <i>circATXN7</i> | miR-337-3p            | 2 |
| <i>circATXN7</i> | miR-342-5p/4664-5p    | 4 |
| <i>circATXN7</i> | miR-345-3p            | 1 |
| <i>circATXN7</i> | miR-345-5p            | 1 |
| <i>circATXN7</i> | miR-34b-5p/449c-5p    | 1 |
| <i>circATXN7</i> | miR-3605-3p           | 4 |
| <i>circATXN7</i> | miR-3605-5p           | 1 |
| <i>circATXN7</i> | miR-3616-3p           | 4 |
| <i>circATXN7</i> | miR-362-5p/500b-5p    | 1 |
| <i>circATXN7</i> | miR-3622a-3p/3622b-3p | 2 |
| <i>circATXN7</i> | miR-3650              | 5 |
| <i>circATXN7</i> | miR-3651              | 3 |
| <i>circATXN7</i> | miR-3653-5p           | 4 |
| <i>circATXN7</i> | miR-3659              | 1 |
| <i>circATXN7</i> | miR-3671              | 3 |
| <i>circATXN7</i> | miR-3675-3p           | 2 |
| <i>circATXN7</i> | miR-3675-5p           | 1 |
| <i>circATXN7</i> | miR-3677-5p           | 1 |
| <i>circATXN7</i> | miR-3678-5p           | 1 |

|                  |                     |   |
|------------------|---------------------|---|
| <i>circATXN7</i> | miR-3682-3p         | 1 |
| <i>circATXN7</i> | miR-3685            | 2 |
| <i>circATXN7</i> | miR-3688-3p         | 1 |
| <i>circATXN7</i> | miR-3688-5p         | 1 |
| <i>circATXN7</i> | miR-3690            | 6 |
| <i>circATXN7</i> | miR-375             | 3 |
| <i>circATXN7</i> | miR-376-3p          | 1 |
| <i>circATXN7</i> | miR-376b-5p/376c-5p | 1 |
| <i>circATXN7</i> | miR-376c-3p         | 1 |
| <i>circATXN7</i> | miR-377-5p/6086     | 6 |
| <i>circATXN7</i> | miR-378j/6839-5p    | 1 |
| <i>circATXN7</i> | miR-380-5p/563      | 2 |
| <i>circATXN7</i> | miR-384             | 2 |
| <i>circATXN7</i> | miR-3911            | 1 |
| <i>circATXN7</i> | miR-3915            | 1 |
| <i>circATXN7</i> | miR-3921/4653-5p    | 3 |
| <i>circATXN7</i> | miR-3927-5p         | 2 |
| <i>circATXN7</i> | miR-3929/4419b/4478 | 4 |
| <i>circATXN7</i> | miR-3934-3p         | 1 |
| <i>circATXN7</i> | miR-3940-5p/4507    | 2 |
| <i>circATXN7</i> | miR-3942-3p         | 2 |
| <i>circATXN7</i> | miR-3975            | 4 |
| <i>circATXN7</i> | miR-3977            | 2 |
| <i>circATXN7</i> | miR-421             | 3 |
| <i>circATXN7</i> | miR-423-3p          | 3 |
| <i>circATXN7</i> | miR-423-5p          | 4 |
| <i>circATXN7</i> | miR-4251            | 8 |
| <i>circATXN7</i> | miR-4254            | 6 |
| <i>circATXN7</i> | miR-4259            | 2 |
| <i>circATXN7</i> | miR-4264            | 1 |
| <i>circATXN7</i> | miR-4266            | 4 |
| <i>circATXN7</i> | miR-4269/6715b-5p   | 1 |
| <i>circATXN7</i> | miR-4284            | 1 |
| <i>circATXN7</i> | miR-4290            | 1 |
| <i>circATXN7</i> | miR-4292/6791-5p    | 6 |
| <i>circATXN7</i> | miR-4293            | 3 |
| <i>circATXN7</i> | miR-4294            | 2 |
| <i>circATXN7</i> | miR-4297/5581-5p    | 1 |

|                  |                     |   |
|------------------|---------------------|---|
| <i>circATXN7</i> | miR-4303            | 1 |
| <i>circATXN7</i> | miR-4307            | 2 |
| <i>circATXN7</i> | miR-4308            | 6 |
| <i>circATXN7</i> | miR-4312            | 1 |
| <i>circATXN7</i> | miR-4314            | 1 |
| <i>circATXN7</i> | miR-4316            | 8 |
| <i>circATXN7</i> | miR-432-5p          | 4 |
| <i>circATXN7</i> | miR-4324            | 6 |
| <i>circATXN7</i> | miR-4328            | 1 |
| <i>circATXN7</i> | miR-4329            | 8 |
| <i>circATXN7</i> | miR-4422            | 1 |
| <i>circATXN7</i> | miR-4426/4647/4662b | 1 |
| <i>circATXN7</i> | miR-4427            | 1 |
| <i>circATXN7</i> | miR-4428            | 1 |
| <i>circATXN7</i> | miR-4432            | 4 |
| <i>circATXN7</i> | miR-4434/4516/5703  | 2 |
| <i>circATXN7</i> | miR-4455            | 5 |
| <i>circATXN7</i> | miR-4463            | 4 |
| <i>circATXN7</i> | miR-4464/4748       | 8 |
| <i>circATXN7</i> | miR-4468            | 1 |
| <i>circATXN7</i> | miR-4475            | 1 |
| <i>circATXN7</i> | miR-4477b           | 2 |
| <i>circATXN7</i> | miR-4484            | 4 |
| <i>circATXN7</i> | miR-4494            | 1 |
| <i>circATXN7</i> | miR-4496            | 2 |
| <i>circATXN7</i> | miR-4499            | 4 |
| <i>circATXN7</i> | miR-4504            | 1 |
| <i>circATXN7</i> | miR-4506            | 1 |
| <i>circATXN7</i> | miR-4512            | 2 |
| <i>circATXN7</i> | miR-4514/4692       | 1 |
| <i>circATXN7</i> | miR-4522            | 1 |
| <i>circATXN7</i> | miR-4524b-3p        | 1 |
| <i>circATXN7</i> | miR-4531            | 1 |
| <i>circATXN7</i> | miR-4533            | 4 |
| <i>circATXN7</i> | miR-455-3p.1        | 1 |
| <i>circATXN7</i> | miR-455-5p          | 2 |
| <i>circATXN7</i> | miR-4633-3p/6500-5p | 1 |
| <i>circATXN7</i> | miR-4638-5p         | 3 |

|                  |                             |   |
|------------------|-----------------------------|---|
| <i>circATXN7</i> | miR-4643                    | 3 |
| <i>circATXN7</i> | miR-4645-3p                 | 1 |
| <i>circATXN7</i> | miR-4648                    | 2 |
| <i>circATXN7</i> | miR-4649-3p                 | 1 |
| <i>circATXN7</i> | miR-4654/4769-5p            | 2 |
| <i>circATXN7</i> | miR-4659a-3p/4659b-3p       | 3 |
| <i>circATXN7</i> | miR-4661-5p                 | 4 |
| <i>circATXN7</i> | miR-4663                    | 5 |
| <i>circATXN7</i> | miR-4668-5p                 | 1 |
| <i>circATXN7</i> | miR-4677-3p                 | 5 |
| <i>circATXN7</i> | miR-4679                    | 5 |
| <i>circATXN7</i> | miR-4680-3p                 | 1 |
| <i>circATXN7</i> | miR-4682                    | 1 |
| <i>circATXN7</i> | miR-4683                    | 1 |
| <i>circATXN7</i> | miR-4687-3p                 | 1 |
| <i>circATXN7</i> | miR-4687-5p                 | 4 |
| <i>circATXN7</i> | miR-4688/6743-5p            | 4 |
| <i>circATXN7</i> | miR-4689/6858-5p            | 1 |
| <i>circATXN7</i> | miR-4690-3p/5685            | 3 |
| <i>circATXN7</i> | miR-4690-5p                 | 1 |
| <i>circATXN7</i> | miR-4695-5p                 | 5 |
| <i>circATXN7</i> | miR-4696                    | 1 |
| <i>circATXN7</i> | miR-4704-3p                 | 1 |
| <i>circATXN7</i> | miR-4708-5p                 | 1 |
| <i>circATXN7</i> | miR-4709-5p                 | 3 |
| <i>circATXN7</i> | miR-4715-5p                 | 2 |
| <i>circATXN7</i> | miR-4720-5p/4799-3p/5588-5p | 1 |
| <i>circATXN7</i> | miR-4721                    | 4 |
| <i>circATXN7</i> | miR-4724-5p                 | 2 |
| <i>circATXN7</i> | miR-4727-5p                 | 2 |
| <i>circATXN7</i> | miR-4728-3p                 | 1 |
| <i>circATXN7</i> | miR-4736                    | 2 |
| <i>circATXN7</i> | miR-4742-5p                 | 1 |
| <i>circATXN7</i> | miR-4752                    | 1 |
| <i>circATXN7</i> | miR-4755-5p/5006-3p         | 3 |
| <i>circATXN7</i> | miR-4762-5p                 | 3 |
| <i>circATXN7</i> | miR-4766-5p                 | 2 |
| <i>circATXN7</i> | miR-4777-5p                 | 1 |



|                  |                             |   |
|------------------|-----------------------------|---|
| <i>circATXN7</i> | miR-4778-3p                 | 1 |
| <i>circATXN7</i> | miR-4779                    | 5 |
| <i>circATXN7</i> | miR-4789-3p                 | 3 |
| <i>circATXN7</i> | miR-4796-3p                 | 1 |
| <i>circATXN7</i> | miR-4797-3p                 | 1 |
| <i>circATXN7</i> | miR-4803                    | 1 |
| <i>circATXN7</i> | miR-483-3p.2                | 5 |
| <i>circATXN7</i> | miR-485-5p                  | 4 |
| <i>circATXN7</i> | miR-486-3p                  | 2 |
| <i>circATXN7</i> | miR-490-5p                  | 2 |
| <i>circATXN7</i> | miR-493-3p                  | 2 |
| <i>circATXN7</i> | miR-499a-3p/499b-3p         | 3 |
| <i>circATXN7</i> | miR-499b-5p                 | 1 |
| <i>circATXN7</i> | miR-5001-3p                 | 2 |
| <i>circATXN7</i> | miR-5007-5p                 | 3 |
| <i>circATXN7</i> | miR-5009-5p/8058            | 1 |
| <i>circATXN7</i> | miR-501-5p                  | 1 |
| <i>circATXN7</i> | miR-5010-3p                 | 3 |
| <i>circATXN7</i> | miR-504-3p                  | 2 |
| <i>circATXN7</i> | miR-504-5p.1                | 3 |
| <i>circATXN7</i> | miR-505-3p.2                | 3 |
| <i>circATXN7</i> | miR-506-5p                  | 2 |
| <i>circATXN7</i> | miR-509-3-5p/509-5p/4418    | 1 |
| <i>circATXN7</i> | miR-510-5p                  | 4 |
| <i>circATXN7</i> | miR-5100                    | 2 |
| <i>circATXN7</i> | miR-513a-3p/513c-3p/3606-3p | 2 |
| <i>circATXN7</i> | miR-513c-5p/514b-5p         | 2 |
| <i>circATXN7</i> | miR-515-5p/519e-5p          | 4 |
| <i>circATXN7</i> | miR-5186                    | 1 |
| <i>circATXN7</i> | miR-5187-3p                 | 1 |
| <i>circATXN7</i> | miR-5187-5p                 | 4 |
| <i>circATXN7</i> | miR-518a-5p/527             | 2 |
| <i>circATXN7</i> | miR-518c-5p                 | 1 |
| <i>circATXN7</i> | miR-518d-5p/519-5p          | 1 |
| <i>circATXN7</i> | miR-5190                    | 2 |
| <i>circATXN7</i> | miR-5194                    | 4 |
| <i>circATXN7</i> | miR-524-5p                  | 4 |
| <i>circATXN7</i> | miR-539-5p                  | 4 |

|                  |                                                                  |   |
|------------------|------------------------------------------------------------------|---|
| <i>circATXN7</i> | miR-542-3p                                                       | 1 |
| <i>circATXN7</i> | miR-544b                                                         | 6 |
| <i>circATXN7</i> | miR-545-3p                                                       | 3 |
| <i>circATXN7</i> | miR-548ac/548bb-3p/548d-3p/548h-3p/548z                          | 2 |
| <i>circATXN7</i> | miR-548aj-5p/548f-5p/548g-5p/548x-5p                             | 2 |
| <i>circATXN7</i> | miR-548an                                                        | 4 |
| <i>circATXN7</i> | miR-548aq-3p/548am-3p/548aj-3p/548ah-3p/548ae-3p/548j-3p/548x-3p | 2 |
| <i>circATXN7</i> | miR-548av-3p                                                     | 1 |
| <i>circATXN7</i> | miR-548aw                                                        | 2 |
| <i>circATXN7</i> | miR-548az-3p/548ar-3p/548a-3p/548e-3p/548f-3p                    | 2 |
| <i>circATXN7</i> | miR-548e-5p                                                      | 1 |
| <i>circATXN7</i> | miR-548u/7161-5p                                                 | 1 |
| <i>circATXN7</i> | miR-548v                                                         | 4 |
| <i>circATXN7</i> | miR-5580-5p                                                      | 2 |
| <i>circATXN7</i> | miR-5582-3p                                                      | 5 |
| <i>circATXN7</i> | miR-5585-3p                                                      | 1 |
| <i>circATXN7</i> | miR-5681a                                                        | 2 |
| <i>circATXN7</i> | miR-5693                                                         | 1 |
| <i>circATXN7</i> | miR-570-3p                                                       | 1 |
| <i>circATXN7</i> | miR-5702                                                         | 2 |
| <i>circATXN7</i> | miR-5708                                                         | 1 |
| <i>circATXN7</i> | miR-571                                                          | 2 |
| <i>circATXN7</i> | miR-574-5p                                                       | 1 |
| <i>circATXN7</i> | miR-576-3p                                                       | 1 |
| <i>circATXN7</i> | miR-584-3p                                                       | 1 |
| <i>circATXN7</i> | miR-587                                                          | 2 |
| <i>circATXN7</i> | miR-589-3p                                                       | 1 |
| <i>circATXN7</i> | miR-590-3p                                                       | 2 |
| <i>circATXN7</i> | miR-591                                                          | 2 |
| <i>circATXN7</i> | miR-596                                                          | 3 |
| <i>circATXN7</i> | miR-597-3p                                                       | 1 |
| <i>circATXN7</i> | miR-6076/6797-3p                                                 | 3 |
| <i>circATXN7</i> | miR-6077                                                         | 5 |
| <i>circATXN7</i> | miR-608/4651                                                     | 4 |
| <i>circATXN7</i> | miR-6085/6813-5p                                                 | 4 |
| <i>circATXN7</i> | miR-609                                                          | 5 |
| <i>circATXN7</i> | miR-610                                                          | 1 |
| <i>circATXN7</i> | miR-6124                                                         | 1 |

|                  |                             |   |
|------------------|-----------------------------|---|
| <i>circATXN7</i> | miR-6125                    | 4 |
| <i>circATXN7</i> | miR-6126                    | 2 |
| <i>circATXN7</i> | miR-6132/6836-5p            | 2 |
| <i>circATXN7</i> | miR-6165                    | 1 |
| <i>circATXN7</i> | miR-619-3p                  | 2 |
| <i>circATXN7</i> | miR-628-5p                  | 5 |
| <i>circATXN7</i> | miR-629-3p                  | 2 |
| <i>circATXN7</i> | miR-629-5p                  | 4 |
| <i>circATXN7</i> | miR-631/3661                | 1 |
| <i>circATXN7</i> | miR-633                     | 2 |
| <i>circATXN7</i> | miR-636                     | 1 |
| <i>circATXN7</i> | miR-641/3617-5p             | 1 |
| <i>circATXN7</i> | miR-644a                    | 1 |
| <i>circATXN7</i> | miR-647                     | 1 |
| <i>circATXN7</i> | miR-6509-5p                 | 4 |
| <i>circATXN7</i> | miR-651-3p                  | 6 |
| <i>circATXN7</i> | miR-6510-5p                 | 1 |
| <i>circATXN7</i> | miR-6515-3p                 | 3 |
| <i>circATXN7</i> | miR-652-3p                  | 3 |
| <i>circATXN7</i> | miR-653-3p                  | 1 |
| <i>circATXN7</i> | miR-654-5p                  | 2 |
| <i>circATXN7</i> | miR-655-5p                  | 6 |
| <i>circATXN7</i> | miR-656-5p                  | 3 |
| <i>circATXN7</i> | miR-664a-5p/4794            | 4 |
| <i>circATXN7</i> | miR-670-5p                  | 6 |
| <i>circATXN7</i> | miR-6715b-3p                | 2 |
| <i>circATXN7</i> | miR-6722-5p                 | 2 |
| <i>circATXN7</i> | miR-6726-3p                 | 1 |
| <i>circATXN7</i> | miR-6730-5p                 | 2 |
| <i>circATXN7</i> | miR-6731-5p/8085            | 2 |
| <i>circATXN7</i> | miR-6734-5p                 | 6 |
| <i>circATXN7</i> | miR-6744-5p                 | 1 |
| <i>circATXN7</i> | miR-6746-3p                 | 1 |
| <i>circATXN7</i> | miR-6747-5p                 | 4 |
| <i>circATXN7</i> | miR-675-5p/4466             | 4 |
| <i>circATXN7</i> | miR-6751-5p/6803-5p         | 5 |
| <i>circATXN7</i> | miR-6752-3p                 | 3 |
| <i>circATXN7</i> | miR-6752-5p/6842-5p/7110-5p | 4 |

|                  |                       |   |
|------------------|-----------------------|---|
| <i>circATXN7</i> | miR-6761-5p           | 8 |
| <i>circATXN7</i> | miR-6764-3p/6824-3p   | 1 |
| <i>circATXN7</i> | miR-6765-3p           | 2 |
| <i>circATXN7</i> | miR-6768-3p           | 4 |
| <i>circATXN7</i> | miR-6769a-5p/6769b-5p | 2 |
| <i>circATXN7</i> | miR-6772-5p           | 5 |
| <i>circATXN7</i> | miR-6776-5p           | 2 |
| <i>circATXN7</i> | miR-6779-3p           | 4 |
| <i>circATXN7</i> | miR-6783-5p           | 1 |
| <i>circATXN7</i> | miR-6785-3p           | 1 |
| <i>circATXN7</i> | miR-6794-3p           | 4 |
| <i>circATXN7</i> | miR-6798-5p           | 1 |
| <i>circATXN7</i> | miR-6799-5p           | 1 |
| <i>circATXN7</i> | miR-6804-3p           | 1 |
| <i>circATXN7</i> | miR-6807-5p           | 2 |
| <i>circATXN7</i> | miR-6808-3p           | 4 |
| <i>circATXN7</i> | miR-6813-3p           | 4 |
| <i>circATXN7</i> | miR-6823-5p           | 1 |
| <i>circATXN7</i> | miR-6825-5p           | 1 |
| <i>circATXN7</i> | miR-6833-5p           | 1 |
| <i>circATXN7</i> | miR-6834-3p           | 1 |
| <i>circATXN7</i> | miR-6834-5p           | 6 |
| <i>circATXN7</i> | miR-6835-5p           | 4 |
| <i>circATXN7</i> | miR-6836-3p           | 2 |
| <i>circATXN7</i> | miR-6839-3p           | 2 |
| <i>circATXN7</i> | miR-6841-3p           | 1 |
| <i>circATXN7</i> | miR-6842-3p           | 1 |
| <i>circATXN7</i> | miR-6846-5p/6848-5p   | 1 |
| <i>circATXN7</i> | miR-6856-3p           | 3 |
| <i>circATXN7</i> | miR-6861-5p           | 2 |
| <i>circATXN7</i> | miR-6864-5p           | 2 |
| <i>circATXN7</i> | miR-6867-5p           | 1 |
| <i>circATXN7</i> | miR-6868-5p           | 1 |
| <i>circATXN7</i> | miR-6869-5p           | 1 |
| <i>circATXN7</i> | miR-6870-3p           | 2 |
| <i>circATXN7</i> | miR-6875-3p           | 3 |
| <i>circATXN7</i> | miR-6878-5p           | 2 |
| <i>circATXN7</i> | miR-6880-3p           | 1 |

|                  |                         |   |
|------------------|-------------------------|---|
| <i>circATXN7</i> | miR-6890-5p             | 1 |
| <i>circATXN7</i> | miR-6895-5p             | 2 |
| <i>circATXN7</i> | miR-7-5p                | 5 |
| <i>circATXN7</i> | miR-7106-5p             | 1 |
| <i>circATXN7</i> | miR-7109-5p             | 5 |
| <i>circATXN7</i> | miR-7150                | 1 |
| <i>circATXN7</i> | miR-7153-3p             | 2 |
| <i>circATXN7</i> | miR-7159-5p             | 3 |
| <i>circATXN7</i> | miR-7160-3p             | 2 |
| <i>circATXN7</i> | miR-7160-5p             | 5 |
| <i>circATXN7</i> | miR-7162-3p             | 1 |
| <i>circATXN7</i> | miR-758-5p              | 2 |
| <i>circATXN7</i> | miR-759                 | 1 |
| <i>circATXN7</i> | miR-764                 | 3 |
| <i>circATXN7</i> | miR-7705                | 2 |
| <i>circATXN7</i> | miR-7843-3p             | 1 |
| <i>circATXN7</i> | miR-7844-5p             | 2 |
| <i>circATXN7</i> | miR-7848-3p             | 3 |
| <i>circATXN7</i> | miR-7851-3p             | 2 |
| <i>circATXN7</i> | miR-7974                | 1 |
| <i>circATXN7</i> | miR-7976                | 4 |
| <i>circATXN7</i> | miR-8057                | 1 |
| <i>circATXN7</i> | miR-8077                | 5 |
| <i>circATXN7</i> | miR-8087                | 4 |
| <i>circATXN7</i> | miR-876-3p              | 3 |
| <i>circATXN7</i> | miR-891a-3p             | 1 |
| <i>circATXN7</i> | miR-892-5p              | 2 |
| <i>circATXN7</i> | miR-892b                | 2 |
| <i>circATXN7</i> | miR-92a-2-5p            | 2 |
| <i>circATXN7</i> | miR-935                 | 1 |
| <i>circATXN7</i> | miR-939-5p/1343-5p      | 1 |
| <i>circATXN7</i> | miR-940/6808-5p/6893-5p | 1 |
| <i>circAUTS2</i> | miR-103a-2-5p           | 3 |
| <i>circAUTS2</i> | miR-1197                | 1 |
| <i>circAUTS2</i> | miR-1199-5p/6751-3p     | 1 |
| <i>circAUTS2</i> | miR-1200                | 4 |
| <i>circAUTS2</i> | miR-1231                | 2 |
| <i>circAUTS2</i> | miR-1236-3p             | 2 |

|                  |                                 |   |
|------------------|---------------------------------|---|
| <i>circAUTS2</i> | miR-1238-5p/4758-5p             | 1 |
| <i>circAUTS2</i> | miR-1250-3p                     | 4 |
| <i>circAUTS2</i> | miR-1256                        | 1 |
| <i>circAUTS2</i> | miR-1262/4701-3p/6736-5p        | 7 |
| <i>circAUTS2</i> | miR-1268a/1268b                 | 1 |
| <i>circAUTS2</i> | miR-1293/4483                   | 8 |
| <i>circAUTS2</i> | miR-133a-3p.2/133b              | 1 |
| <i>circAUTS2</i> | miR-134-3p                      | 2 |
| <i>circAUTS2</i> | miR-141-5p                      | 1 |
| <i>circAUTS2</i> | miR-142-3p.1                    | 3 |
| <i>circAUTS2</i> | miR-145-3p                      | 4 |
| <i>circAUTS2</i> | miR-153-5p                      | 1 |
| <i>circAUTS2</i> | miR-1537-5p                     | 1 |
| <i>circAUTS2</i> | miR-18-5p                       | 1 |
| <i>circAUTS2</i> | miR-1909-5p                     | 3 |
| <i>circAUTS2</i> | miR-203b-5p/6718-5p             | 3 |
| <i>circAUTS2</i> | miR-20b-3p                      | 1 |
| <i>circAUTS2</i> | miR-2467-3p                     | 6 |
| <i>circAUTS2</i> | miR-2467-5p                     | 4 |
| <i>circAUTS2</i> | miR-302-3p/372-3p/373-3p/520-3p | 5 |
| <i>circAUTS2</i> | miR-302c-3p.2/520-3p            | 7 |
| <i>circAUTS2</i> | miR-3074-5p                     | 4 |
| <i>circAUTS2</i> | miR-3120-5p                     | 1 |
| <i>circAUTS2</i> | miR-3127-5p                     | 1 |
| <i>circAUTS2</i> | miR-3128                        | 2 |
| <i>circAUTS2</i> | miR-3137                        | 1 |
| <i>circAUTS2</i> | miR-3160-3p                     | 3 |
| <i>circAUTS2</i> | miR-3180-3p                     | 2 |
| <i>circAUTS2</i> | miR-3188                        | 4 |
| <i>circAUTS2</i> | miR-3200-5p                     | 1 |
| <i>circAUTS2</i> | miR-337-5p                      | 1 |
| <i>circAUTS2</i> | miR-33b-3p/515-3p/519e-3p       | 2 |
| <i>circAUTS2</i> | miR-346                         | 1 |
| <i>circAUTS2</i> | miR-363-5p/6745                 | 8 |
| <i>circAUTS2</i> | miR-3650                        | 3 |
| <i>circAUTS2</i> | miR-371a-3p                     | 2 |
| <i>circAUTS2</i> | miR-371b-3p                     | 2 |
| <i>circAUTS2</i> | miR-378a-5p                     | 4 |

|                  |                               |   |
|------------------|-------------------------------|---|
| <i>circAUTS2</i> | miR-3907                      | 4 |
| <i>circAUTS2</i> | miR-3911                      | 2 |
| <i>circAUTS2</i> | miR-3919                      | 2 |
| <i>circAUTS2</i> | miR-3975                      | 4 |
| <i>circAUTS2</i> | miR-3977                      | 4 |
| <i>circAUTS2</i> | miR-4265/4296/4322            | 2 |
| <i>circAUTS2</i> | miR-4297/5581-5p              | 2 |
| <i>circAUTS2</i> | miR-4303                      | 6 |
| <i>circAUTS2</i> | miR-4304                      | 1 |
| <i>circAUTS2</i> | miR-4324                      | 3 |
| <i>circAUTS2</i> | miR-4326                      | 1 |
| <i>circAUTS2</i> | miR-4460                      | 1 |
| <i>circAUTS2</i> | miR-4487                      | 3 |
| <i>circAUTS2</i> | miR-4649-3p                   | 3 |
| <i>circAUTS2</i> | miR-4658/6790-5p              | 1 |
| <i>circAUTS2</i> | miR-4659a-3p/4659b-3p         | 1 |
| <i>circAUTS2</i> | miR-4663                      | 3 |
| <i>circAUTS2</i> | miR-4682                      | 5 |
| <i>circAUTS2</i> | miR-4688/6743-5p              | 2 |
| <i>circAUTS2</i> | miR-4718                      | 1 |
| <i>circAUTS2</i> | miR-4720-5p/4799-3p/5588-5p   | 2 |
| <i>circAUTS2</i> | miR-4727-3p                   | 1 |
| <i>circAUTS2</i> | miR-4753-3p                   | 3 |
| <i>circAUTS2</i> | miR-4756-3p                   | 2 |
| <i>circAUTS2</i> | miR-4761-5p                   | 1 |
| <i>circAUTS2</i> | miR-4768-5p/6833-3p           | 2 |
| <i>circAUTS2</i> | miR-4778-3p                   | 2 |
| <i>circAUTS2</i> | miR-485-5p                    | 4 |
| <i>circAUTS2</i> | miR-488-3p                    | 2 |
| <i>circAUTS2</i> | miR-4999-5p                   | 1 |
| <i>circAUTS2</i> | miR-512-3p                    | 7 |
| <i>circAUTS2</i> | miR-515-5p/519e-5p            | 2 |
| <i>circAUTS2</i> | miR-516a-5p                   | 1 |
| <i>circAUTS2</i> | miR-5186                      | 1 |
| <i>circAUTS2</i> | miR-519-3p                    | 5 |
| <i>circAUTS2</i> | miR-544b                      | 3 |
| <i>circAUTS2</i> | miR-550a-3-5p/550a-5p/1271-3p | 2 |
| <i>circAUTS2</i> | miR-558                       | 3 |

|                  |                     |   |
|------------------|---------------------|---|
| <i>circAUTS2</i> | miR-5580-5p         | 3 |
| <i>circAUTS2</i> | miR-5587-5p         | 1 |
| <i>circAUTS2</i> | miR-5681a           | 3 |
| <i>circAUTS2</i> | miR-5691            | 2 |
| <i>circAUTS2</i> | miR-5696            | 1 |
| <i>circAUTS2</i> | miR-578             | 1 |
| <i>circAUTS2</i> | miR-579-3p          | 1 |
| <i>circAUTS2</i> | miR-585-3p          | 1 |
| <i>circAUTS2</i> | miR-6071            | 4 |
| <i>circAUTS2</i> | miR-6073            | 3 |
| <i>circAUTS2</i> | miR-6085/6813-5p    | 2 |
| <i>circAUTS2</i> | miR-616-3p          | 1 |
| <i>circAUTS2</i> | miR-627-5p          | 4 |
| <i>circAUTS2</i> | miR-629-3p          | 2 |
| <i>circAUTS2</i> | miR-632/4288        | 2 |
| <i>circAUTS2</i> | miR-636             | 2 |
| <i>circAUTS2</i> | miR-644a            | 2 |
| <i>circAUTS2</i> | miR-647             | 5 |
| <i>circAUTS2</i> | miR-6515-3p         | 2 |
| <i>circAUTS2</i> | miR-6730-5p         | 3 |
| <i>circAUTS2</i> | miR-6741-5p         | 7 |
| <i>circAUTS2</i> | miR-6748-5p         | 6 |
| <i>circAUTS2</i> | miR-6756-5p/6766-5p | 8 |
| <i>circAUTS2</i> | miR-6759-5p         | 2 |
| <i>circAUTS2</i> | miR-6765-5p         | 2 |
| <i>circAUTS2</i> | miR-6793-5p         | 6 |
| <i>circAUTS2</i> | miR-6796-5p         | 2 |
| <i>circAUTS2</i> | miR-6798-5p         | 2 |
| <i>circAUTS2</i> | miR-6801-5p         | 1 |
| <i>circAUTS2</i> | miR-6809-3p         | 2 |
| <i>circAUTS2</i> | miR-6814-5p         | 1 |
| <i>circAUTS2</i> | miR-6816-3p         | 1 |
| <i>circAUTS2</i> | miR-6828-3p         | 4 |
| <i>circAUTS2</i> | miR-6842-3p         | 5 |
| <i>circAUTS2</i> | miR-6844            | 2 |
| <i>circAUTS2</i> | miR-6854-3p         | 1 |
| <i>circAUTS2</i> | miR-6868-5p         | 2 |
| <i>circAUTS2</i> | miR-6875-3p         | 1 |



|                  |                          |    |
|------------------|--------------------------|----|
| <i>circAUTS2</i> | miR-7150                 | 1  |
| <i>circAUTS2</i> | miR-7152-5p              | 4  |
| <i>circAUTS2</i> | miR-7160-5p              | 3  |
| <i>circAUTS2</i> | miR-7162-3p              | 3  |
| <i>circAUTS2</i> | miR-767-3p               | 1  |
| <i>circAUTS2</i> | miR-8077                 | 3  |
| <i>circAUTS2</i> | miR-8080                 | 1  |
| <i>circAUTS2</i> | miR-924                  | 2  |
| <i>circAUTS2</i> | miR-937-5p               | 4  |
| <i>circAUTS2</i> | miR-942-5p               | 2  |
| <i>circAUTS2</i> | miR-1178-5p              | 1  |
| <i>circAUTS2</i> | miR-1182                 | 1  |
| <i>circAUTS2</i> | miR-1184                 | 6  |
| <i>circAUTS2</i> | miR-1203                 | 1  |
| <i>circAUTS2</i> | miR-1205                 | 6  |
| <i>circAUTS2</i> | miR-1207-3p              | 4  |
| <i>circAUTS2</i> | miR-1207-5p/4763-3p      | 3  |
| <i>circAUTS2</i> | miR-122-5p               | 2  |
| <i>circAUTS2</i> | miR-1226-5p              | 3  |
| <i>circAUTS2</i> | miR-1227-3p              | 3  |
| <i>circAUTS2</i> | miR-1227-5p              | 4  |
| <i>circAUTS2</i> | miR-1233-5p/6778-5p      | 10 |
| <i>circAUTS2</i> | miR-1237-5p/4488/4697-5p | 2  |
| <i>circAUTS2</i> | miR-1247-3p              | 2  |
| <i>circAUTS2</i> | miR-1249-5p/6797-5p      | 7  |
| <i>circAUTS2</i> | miR-1251-5p              | 1  |
| <i>circAUTS2</i> | miR-1252-5p              | 1  |
| <i>circAUTS2</i> | miR-1253                 | 1  |
| <i>circAUTS2</i> | miR-1254/3116            | 1  |
| <i>circAUTS2</i> | miR-125a-3p              | 1  |
| <i>circAUTS2</i> | miR-1266-5p/4518         | 1  |
| <i>circAUTS2</i> | miR-1267                 | 4  |
| <i>circAUTS2</i> | miR-127-5p               | 2  |
| <i>circAUTS2</i> | miR-1272                 | 2  |
| <i>circAUTS2</i> | miR-1273f                | 1  |
| <i>circAUTS2</i> | miR-1273g-5p             | 2  |
| <i>circAUTS2</i> | miR-1273h-3p             | 4  |
| <i>circAUTS2</i> | miR-1275/4665-5p         | 3  |

|                  |                                      |   |
|------------------|--------------------------------------|---|
| <i>circAUTS2</i> | miR-1279                             | 3 |
| <i>circAUTS2</i> | miR-128-1-5p                         | 1 |
| <i>circAUTS2</i> | miR-1287-5p                          | 4 |
| <i>circAUTS2</i> | miR-1288-3p                          | 3 |
| <i>circAUTS2</i> | miR-1291/6775-3p                     | 2 |
| <i>circAUTS2</i> | miR-1292-5p                          | 2 |
| <i>circAUTS2</i> | miR-1294                             | 2 |
| <i>circAUTS2</i> | miR-1296-3p                          | 5 |
| <i>circAUTS2</i> | miR-1296-5p                          | 1 |
| <i>circAUTS2</i> | miR-1304-5p                          | 2 |
| <i>circAUTS2</i> | miR-1306-5p                          | 4 |
| <i>circAUTS2</i> | miR-130b-5p                          | 5 |
| <i>circAUTS2</i> | miR-132-3p/212-3p                    | 1 |
| <i>circAUTS2</i> | miR-1322                             | 2 |
| <i>circAUTS2</i> | miR-133a-5p                          | 5 |
| <i>circAUTS2</i> | miR-1343-3p                          | 3 |
| <i>circAUTS2</i> | miR-135-5p                           | 1 |
| <i>circAUTS2</i> | miR-135b-3p                          | 2 |
| <i>circAUTS2</i> | miR-138-5p                           | 5 |
| <i>circAUTS2</i> | miR-139-3p                           | 2 |
| <i>circAUTS2</i> | miR-140-3p.1                         | 1 |
| <i>circAUTS2</i> | miR-140-3p.2                         | 3 |
| <i>circAUTS2</i> | miR-140-5p                           | 2 |
| <i>circAUTS2</i> | miR-143-3p                           | 1 |
| <i>circAUTS2</i> | miR-144-5p                           | 1 |
| <i>circAUTS2</i> | miR-146b-3p                          | 2 |
| <i>circAUTS2</i> | miR-1471                             | 1 |
| <i>circAUTS2</i> | miR-147b                             | 3 |
| <i>circAUTS2</i> | miR-149-3p/4728-5p/6785-5p/6883-5p   | 5 |
| <i>circAUTS2</i> | miR-149-5p                           | 4 |
| <i>circAUTS2</i> | miR-15-5p/16-5p/195-5p/424-5p/497-5p | 4 |
| <i>circAUTS2</i> | miR-152-5p                           | 1 |
| <i>circAUTS2</i> | miR-17-3p                            | 6 |
| <i>circAUTS2</i> | miR-1827                             | 6 |
| <i>circAUTS2</i> | miR-185-5p                           | 5 |
| <i>circAUTS2</i> | miR-1908-3p                          | 3 |
| <i>circAUTS2</i> | miR-1908-5p                          | 2 |
| <i>circAUTS2</i> | miR-1909-3p/6722-3p                  | 3 |

|                  |                                              |   |
|------------------|----------------------------------------------|---|
| <i>circAUTS2</i> | miR-1910-3p/6511a-5p                         | 4 |
| <i>circAUTS2</i> | miR-1910-5p                                  | 1 |
| <i>circAUTS2</i> | miR-1914-5p                                  | 1 |
| <i>circAUTS2</i> | miR-1915-3p/6764-5p                          | 3 |
| <i>circAUTS2</i> | miR-192-3p                                   | 2 |
| <i>circAUTS2</i> | miR-193a-5p                                  | 1 |
| <i>circAUTS2</i> | miR-194-3p                                   | 7 |
| <i>circAUTS2</i> | miR-196-5p                                   | 1 |
| <i>circAUTS2</i> | miR-1976                                     | 1 |
| <i>circAUTS2</i> | miR-202-3p                                   | 3 |
| <i>circAUTS2</i> | miR-203a-5p                                  | 2 |
| <i>circAUTS2</i> | miR-204-3p/4646-5p                           | 1 |
| <i>circAUTS2</i> | miR-20a-3p                                   | 2 |
| <i>circAUTS2</i> | miR-210-3p                                   | 3 |
| <i>circAUTS2</i> | miR-2110                                     | 2 |
| <i>circAUTS2</i> | miR-215-3p                                   | 4 |
| <i>circAUTS2</i> | miR-218-5p                                   | 3 |
| <i>circAUTS2</i> | miR-219a-1-3p                                | 1 |
| <i>circAUTS2</i> | miR-219b-5p                                  | 6 |
| <i>circAUTS2</i> | miR-221-5p/8073                              | 4 |
| <i>circAUTS2</i> | miR-223-3p                                   | 3 |
| <i>circAUTS2</i> | miR-224-5p                                   | 1 |
| <i>circAUTS2</i> | miR-2278                                     | 3 |
| <i>circAUTS2</i> | miR-24-3p                                    | 2 |
| <i>circAUTS2</i> | miR-25-5p                                    | 1 |
| <i>circAUTS2</i> | miR-2682-3p/6781-3p                          | 3 |
| <i>circAUTS2</i> | miR-28-5p/708-5p                             | 2 |
| <i>circAUTS2</i> | miR-2861                                     | 4 |
| <i>circAUTS2</i> | miR-29-3p                                    | 1 |
| <i>circAUTS2</i> | miR-296-5p                                   | 2 |
| <i>circAUTS2</i> | miR-301a-5p/301b-5p                          | 3 |
| <i>circAUTS2</i> | miR-302a-5p                                  | 2 |
| <i>circAUTS2</i> | miR-302b-5p/302d-5p                          | 1 |
| <i>circAUTS2</i> | miR-3064-5p                                  | 4 |
| <i>circAUTS2</i> | miR-3065-3p                                  | 1 |
| <i>circAUTS2</i> | miR-30b-3p/1273h-5p/3689-3p/6779-5p/6780a-5p | 6 |
| <i>circAUTS2</i> | miR-30c-3p/6788-5p                           | 6 |
| <i>circAUTS2</i> | miR-3130-3p                                  | 3 |

|                  |                     |   |
|------------------|---------------------|---|
| <i>circAUTS2</i> | miR-3134            | 3 |
| <i>circAUTS2</i> | miR-3135b           | 4 |
| <i>circAUTS2</i> | miR-3136-3p/7155-3p | 1 |
| <i>circAUTS2</i> | miR-3141            | 1 |
| <i>circAUTS2</i> | miR-3144-5p         | 2 |
| <i>circAUTS2</i> | miR-3147            | 2 |
| <i>circAUTS2</i> | miR-3150a-3p        | 2 |
| <i>circAUTS2</i> | miR-3150b-3p        | 3 |
| <i>circAUTS2</i> | miR-3151-5p         | 5 |
| <i>circAUTS2</i> | miR-3154            | 1 |
| <i>circAUTS2</i> | miR-3158-5p         | 6 |
| <i>circAUTS2</i> | miR-3165            | 3 |
| <i>circAUTS2</i> | miR-3166            | 4 |
| <i>circAUTS2</i> | miR-3170/6855-5p    | 2 |
| <i>circAUTS2</i> | miR-3173-3p/6891-5p | 2 |
| <i>circAUTS2</i> | miR-3173-5p         | 2 |
| <i>circAUTS2</i> | miR-3175            | 2 |
| <i>circAUTS2</i> | miR-3177-5p         | 1 |
| <i>circAUTS2</i> | miR-3182            | 2 |
| <i>circAUTS2</i> | miR-3191-3p         | 2 |
| <i>circAUTS2</i> | miR-3192-3p         | 1 |
| <i>circAUTS2</i> | miR-3192-5p         | 1 |
| <i>circAUTS2</i> | miR-3194-3p         | 2 |
| <i>circAUTS2</i> | miR-3198/4309       | 4 |
| <i>circAUTS2</i> | miR-3199/8052       | 3 |
| <i>circAUTS2</i> | miR-320e            | 3 |
| <i>circAUTS2</i> | miR-323a-5p         | 8 |
| <i>circAUTS2</i> | miR-324-5p          | 1 |
| <i>circAUTS2</i> | miR-328-5p/6885-5p  | 3 |
| <i>circAUTS2</i> | miR-329-5p          | 1 |
| <i>circAUTS2</i> | miR-339-5p          | 2 |
| <i>circAUTS2</i> | miR-340-3p/6827-3p  | 1 |
| <i>circAUTS2</i> | miR-342-5p/4664-5p  | 3 |
| <i>circAUTS2</i> | miR-345-5p          | 3 |
| <i>circAUTS2</i> | miR-34b-5p/449c-5p  | 4 |
| <i>circAUTS2</i> | miR-3605-3p         | 1 |
| <i>circAUTS2</i> | miR-3610            | 1 |
| <i>circAUTS2</i> | miR-3611            | 4 |

|                  |                           |   |
|------------------|---------------------------|---|
| <i>circAUTS2</i> | miR-3612                  | 6 |
| <i>circAUTS2</i> | miR-3613-3p               | 2 |
| <i>circAUTS2</i> | miR-3613-5p               | 1 |
| <i>circAUTS2</i> | miR-3616-3p               | 4 |
| <i>circAUTS2</i> | miR-3622a-3p/3622b-3p     | 4 |
| <i>circAUTS2</i> | miR-3622b-5p              | 1 |
| <i>circAUTS2</i> | miR-3652/4430             | 5 |
| <i>circAUTS2</i> | miR-3653-5p               | 1 |
| <i>circAUTS2</i> | miR-3657                  | 6 |
| <i>circAUTS2</i> | miR-3659                  | 2 |
| <i>circAUTS2</i> | miR-365a-5p/365b-5p       | 3 |
| <i>circAUTS2</i> | miR-3660/4526             | 3 |
| <i>circAUTS2</i> | miR-3664-3p               | 1 |
| <i>circAUTS2</i> | miR-3664-5p               | 3 |
| <i>circAUTS2</i> | miR-3665                  | 1 |
| <i>circAUTS2</i> | miR-367-5p                | 4 |
| <i>circAUTS2</i> | miR-3670                  | 3 |
| <i>circAUTS2</i> | miR-3674                  | 5 |
| <i>circAUTS2</i> | miR-3675-5p               | 1 |
| <i>circAUTS2</i> | miR-3678-3p               | 4 |
| <i>circAUTS2</i> | miR-3680-3p               | 2 |
| <i>circAUTS2</i> | miR-3684                  | 1 |
| <i>circAUTS2</i> | miR-3688-3p               | 4 |
| <i>circAUTS2</i> | miR-3689d/6851-5p         | 2 |
| <i>circAUTS2</i> | miR-3691-3p               | 3 |
| <i>circAUTS2</i> | miR-3692-5p               | 5 |
| <i>circAUTS2</i> | miR-371-5p                | 3 |
| <i>circAUTS2</i> | miR-371b-5p/373-5p/616-5p | 3 |
| <i>circAUTS2</i> | miR-372-5p                | 3 |
| <i>circAUTS2</i> | miR-377-5p/6086           | 1 |
| <i>circAUTS2</i> | miR-378g                  | 3 |
| <i>circAUTS2</i> | miR-380-5p/563            | 1 |
| <i>circAUTS2</i> | miR-383-3p                | 1 |
| <i>circAUTS2</i> | miR-3917                  | 1 |
| <i>circAUTS2</i> | miR-3921/4653-5p          | 3 |
| <i>circAUTS2</i> | miR-3926                  | 2 |
| <i>circAUTS2</i> | miR-3927-3p/6831-5p       | 1 |
| <i>circAUTS2</i> | miR-3928-5p/6806-3p       | 1 |

|                  |                                              |   |
|------------------|----------------------------------------------|---|
| <i>circAUTS2</i> | miR-3929/4419b/4478                          | 3 |
| <i>circAUTS2</i> | miR-3934-5p                                  | 1 |
| <i>circAUTS2</i> | miR-3943                                     | 2 |
| <i>circAUTS2</i> | miR-3944-5p                                  | 1 |
| <i>circAUTS2</i> | miR-423-3p                                   | 1 |
| <i>circAUTS2</i> | miR-423-5p                                   | 7 |
| <i>circAUTS2</i> | miR-424-3p                                   | 1 |
| <i>circAUTS2</i> | miR-4251                                     | 2 |
| <i>circAUTS2</i> | miR-4255                                     | 1 |
| <i>circAUTS2</i> | miR-4257                                     | 4 |
| <i>circAUTS2</i> | miR-4259                                     | 1 |
| <i>circAUTS2</i> | miR-4260                                     | 3 |
| <i>circAUTS2</i> | miR-4270/4441/6754-5p                        | 2 |
| <i>circAUTS2</i> | miR-4271/4725-3p/6780b-5p                    | 4 |
| <i>circAUTS2</i> | miR-4273/7156-5p                             | 1 |
| <i>circAUTS2</i> | miR-4274                                     | 2 |
| <i>circAUTS2</i> | miR-4276                                     | 3 |
| <i>circAUTS2</i> | miR-4277                                     | 1 |
| <i>circAUTS2</i> | miR-4279                                     | 1 |
| <i>circAUTS2</i> | miR-4283                                     | 3 |
| <i>circAUTS2</i> | miR-4284                                     | 2 |
| <i>circAUTS2</i> | miR-4291                                     | 2 |
| <i>circAUTS2</i> | miR-4299                                     | 6 |
| <i>circAUTS2</i> | miR-4305                                     | 1 |
| <i>circAUTS2</i> | miR-431-5p                                   | 2 |
| <i>circAUTS2</i> | miR-4316                                     | 2 |
| <i>circAUTS2</i> | miR-4318                                     | 4 |
| <i>circAUTS2</i> | miR-4323                                     | 2 |
| <i>circAUTS2</i> | miR-4329                                     | 2 |
| <i>circAUTS2</i> | miR-4330                                     | 3 |
| <i>circAUTS2</i> | miR-4417                                     | 1 |
| <i>circAUTS2</i> | miR-4421/5699-3p                             | 2 |
| <i>circAUTS2</i> | miR-4425                                     | 2 |
| <i>circAUTS2</i> | miR-4426/4647/4662b                          | 2 |
| <i>circAUTS2</i> | miR-4428                                     | 2 |
| <i>circAUTS2</i> | miR-4433a-3p                                 | 7 |
| <i>circAUTS2</i> | miR-4434/4516/5703                           | 3 |
| <i>circAUTS2</i> | miR-4436b-3p/4632-5p/6735-5p/6879-5p/7843-5p |   |

|                  |                     |    |
|------------------|---------------------|----|
| <i>circAUTS2</i> | miR-4437            | 2  |
| <i>circAUTS2</i> | miR-4438            | 1  |
| <i>circAUTS2</i> | miR-4443            | 4  |
| <i>circAUTS2</i> | miR-4447/4472       | 5  |
| <i>circAUTS2</i> | miR-4455            | 5  |
| <i>circAUTS2</i> | miR-4456            | 6  |
| <i>circAUTS2</i> | miR-4459            | 7  |
| <i>circAUTS2</i> | miR-4468            | 7  |
| <i>circAUTS2</i> | miR-4470            | 3  |
| <i>circAUTS2</i> | miR-4471/8059       | 2  |
| <i>circAUTS2</i> | miR-4474-3p         | 2  |
| <i>circAUTS2</i> | miR-4485-3p         | 1  |
| <i>circAUTS2</i> | miR-4486            | 3  |
| <i>circAUTS2</i> | miR-4489            | 3  |
| <i>circAUTS2</i> | miR-4490            | 3  |
| <i>circAUTS2</i> | miR-4494            | 3  |
| <i>circAUTS2</i> | miR-4501            | 4  |
| <i>circAUTS2</i> | miR-4502            | 5  |
| <i>circAUTS2</i> | miR-4503            | 2  |
| <i>circAUTS2</i> | miR-4505/5787       | 5  |
| <i>circAUTS2</i> | miR-4508            | 1  |
| <i>circAUTS2</i> | miR-450a-2-3p       | 3  |
| <i>circAUTS2</i> | miR-450b-3p/769-3p  | 3  |
| <i>circAUTS2</i> | miR-450b-5p         | 2  |
| <i>circAUTS2</i> | miR-4512            | 5  |
| <i>circAUTS2</i> | miR-4515            | 3  |
| <i>circAUTS2</i> | miR-4519            | 2  |
| <i>circAUTS2</i> | miR-452-5p/892-3p   | 2  |
| <i>circAUTS2</i> | miR-4534/8082       | 3  |
| <i>circAUTS2</i> | miR-455-3p.1        | 1  |
| <i>circAUTS2</i> | miR-4633-3p/6500-5p | 4  |
| <i>circAUTS2</i> | miR-4639-3p         | 2  |
| <i>circAUTS2</i> | miR-4648            | 10 |
| <i>circAUTS2</i> | miR-4652-5p         | 2  |
| <i>circAUTS2</i> | miR-4653-3p         | 2  |
| <i>circAUTS2</i> | miR-4654/4769-5p    | 10 |
| <i>circAUTS2</i> | miR-4656            | 5  |
| <i>circAUTS2</i> | miR-4660            | 2  |

|                  |                                  |    |
|------------------|----------------------------------|----|
| <i>circAUTS2</i> | miR-4665-3p                      | 1  |
| <i>circAUTS2</i> | miR-4666b                        | 1  |
| <i>circAUTS2</i> | miR-4667-5p/4700-5p/8089         | 2  |
| <i>circAUTS2</i> | miR-4669                         | 6  |
| <i>circAUTS2</i> | miR-4675/4741                    | 5  |
| <i>circAUTS2</i> | miR-4677-5p                      | 1  |
| <i>circAUTS2</i> | miR-4680-5p                      | 1  |
| <i>circAUTS2</i> | miR-4683                         | 2  |
| <i>circAUTS2</i> | miR-4684-5p                      | 1  |
| <i>circAUTS2</i> | miR-4685-5p/6837-5p              | 1  |
| <i>circAUTS2</i> | miR-4687-3p                      | 4  |
| <i>circAUTS2</i> | miR-4695-5p                      | 11 |
| <i>circAUTS2</i> | miR-4696                         | 1  |
| <i>circAUTS2</i> | miR-4697-3p                      | 3  |
| <i>circAUTS2</i> | miR-4706/4749-5p                 | 2  |
| <i>circAUTS2</i> | miR-4708-5p                      | 1  |
| <i>circAUTS2</i> | miR-4709-5p                      | 1  |
| <i>circAUTS2</i> | miR-4714-5p                      | 3  |
| <i>circAUTS2</i> | miR-4715-5p                      | 1  |
| <i>circAUTS2</i> | miR-4716-3p/6794-5p              | 5  |
| <i>circAUTS2</i> | miR-4717-5p                      | 1  |
| <i>circAUTS2</i> | miR-4720-3p                      | 2  |
| <i>circAUTS2</i> | miR-4721                         | 4  |
| <i>circAUTS2</i> | miR-4723-5p/5698/6870-5p/7111-5p | 6  |
| <i>circAUTS2</i> | miR-4726-3p                      | 3  |
| <i>circAUTS2</i> | miR-4730                         | 1  |
| <i>circAUTS2</i> | miR-4731-5p                      | 4  |
| <i>circAUTS2</i> | miR-4734                         | 2  |
| <i>circAUTS2</i> | miR-4736                         | 3  |
| <i>circAUTS2</i> | miR-4739                         | 4  |
| <i>circAUTS2</i> | miR-4740-5p                      | 3  |
| <i>circAUTS2</i> | miR-4743-5p                      | 3  |
| <i>circAUTS2</i> | miR-4746-3p                      | 1  |
| <i>circAUTS2</i> | miR-4746-5p                      | 1  |
| <i>circAUTS2</i> | miR-4747-5p/5196-5p              | 2  |
| <i>circAUTS2</i> | miR-4757-5p/6744-3p              | 4  |
| <i>circAUTS2</i> | miR-4761-3p                      | 2  |
| <i>circAUTS2</i> | miR-4762-3p                      | 2  |



|                  |                             |    |
|------------------|-----------------------------|----|
| <i>circAUTS2</i> | miR-4763-5p                 | 1  |
| <i>circAUTS2</i> | miR-4767                    | 2  |
| <i>circAUTS2</i> | miR-4768-3p                 | 7  |
| <i>circAUTS2</i> | miR-4771                    | 4  |
| <i>circAUTS2</i> | miR-4774-5p                 | 3  |
| <i>circAUTS2</i> | miR-4777-5p                 | 1  |
| <i>circAUTS2</i> | miR-4779                    | 11 |
| <i>circAUTS2</i> | miR-4786-3p                 | 4  |
| <i>circAUTS2</i> | miR-4787-5p                 | 1  |
| <i>circAUTS2</i> | miR-4793-3p                 | 3  |
| <i>circAUTS2</i> | miR-4793-5p                 | 1  |
| <i>circAUTS2</i> | miR-4802-3p                 | 2  |
| <i>circAUTS2</i> | miR-4802-5p                 | 1  |
| <i>circAUTS2</i> | miR-4803                    | 3  |
| <i>circAUTS2</i> | miR-4804-3p                 | 2  |
| <i>circAUTS2</i> | miR-484/3155                | 2  |
| <i>circAUTS2</i> | miR-486-3p                  | 3  |
| <i>circAUTS2</i> | miR-491-5p                  | 5  |
| <i>circAUTS2</i> | miR-493-3p                  | 1  |
| <i>circAUTS2</i> | miR-499b-5p                 | 3  |
| <i>circAUTS2</i> | miR-5008-3p/6737-3p/7157-3p | 5  |
| <i>circAUTS2</i> | miR-5008-5p                 | 1  |
| <i>circAUTS2</i> | miR-500a-3p                 | 2  |
| <i>circAUTS2</i> | miR-5010-5p                 | 6  |
| <i>circAUTS2</i> | miR-5011-3p                 | 1  |
| <i>circAUTS2</i> | miR-503-3p                  | 2  |
| <i>circAUTS2</i> | miR-503-5p                  | 4  |
| <i>circAUTS2</i> | miR-504-3p                  | 5  |
| <i>circAUTS2</i> | miR-505-5p                  | 4  |
| <i>circAUTS2</i> | miR-507/557                 | 2  |
| <i>circAUTS2</i> | miR-5089-5p                 | 3  |
| <i>circAUTS2</i> | miR-509-3p                  | 2  |
| <i>circAUTS2</i> | miR-5090/6775-5p            | 1  |
| <i>circAUTS2</i> | miR-5091                    | 2  |
| <i>circAUTS2</i> | miR-511-5p                  | 2  |
| <i>circAUTS2</i> | miR-512-5p                  | 2  |
| <i>circAUTS2</i> | miR-514a-5p                 | 3  |
| <i>circAUTS2</i> | miR-517-5p                  | 1  |

|                  |                                                                  |   |
|------------------|------------------------------------------------------------------|---|
| <i>circAUTS2</i> | miR-5187-5p                                                      | 3 |
| <i>circAUTS2</i> | miR-518d-5p/519-5p                                               | 1 |
| <i>circAUTS2</i> | miR-5192                                                         | 5 |
| <i>circAUTS2</i> | miR-5194                                                         | 7 |
| <i>circAUTS2</i> | miR-5196-3p                                                      | 1 |
| <i>circAUTS2</i> | miR-5197-5p                                                      | 2 |
| <i>circAUTS2</i> | miR-544a                                                         | 4 |
| <i>circAUTS2</i> | miR-548ac/548bb-3p/548d-3p/548h-3p/548z                          | 2 |
| <i>circAUTS2</i> | miR-548ad-3p                                                     | 1 |
| <i>circAUTS2</i> | miR-548aq-3p/548am-3p/548aj-3p/548al-3p/548ae-3p/548j-3p/548x-3p | 2 |
| <i>circAUTS2</i> | miR-548av-3p                                                     | 1 |
| <i>circAUTS2</i> | miR-548g-3p                                                      | 2 |
| <i>circAUTS2</i> | miR-548q                                                         | 6 |
| <i>circAUTS2</i> | miR-551-3p                                                       | 1 |
| <i>circAUTS2</i> | miR-552-3p                                                       | 1 |
| <i>circAUTS2</i> | miR-5572                                                         | 3 |
| <i>circAUTS2</i> | miR-5580-3p                                                      | 3 |
| <i>circAUTS2</i> | miR-5584-5p                                                      | 1 |
| <i>circAUTS2</i> | miR-5589-5p                                                      | 4 |
| <i>circAUTS2</i> | miR-5681b                                                        | 2 |
| <i>circAUTS2</i> | miR-5693                                                         | 7 |
| <i>circAUTS2</i> | miR-571                                                          | 1 |
| <i>circAUTS2</i> | miR-5739                                                         | 2 |
| <i>circAUTS2</i> | miR-574-5p                                                       | 2 |
| <i>circAUTS2</i> | miR-576-3p                                                       | 2 |
| <i>circAUTS2</i> | miR-579-5p                                                       | 1 |
| <i>circAUTS2</i> | miR-597-3p                                                       | 1 |
| <i>circAUTS2</i> | miR-604                                                          | 2 |
| <i>circAUTS2</i> | miR-6075                                                         | 1 |
| <i>circAUTS2</i> | miR-6076/6797-3p                                                 | 1 |
| <i>circAUTS2</i> | miR-608/4651                                                     | 3 |
| <i>circAUTS2</i> | miR-6081                                                         | 1 |
| <i>circAUTS2</i> | miR-6089                                                         | 1 |
| <i>circAUTS2</i> | miR-609                                                          | 5 |
| <i>circAUTS2</i> | miR-612/1285-3p/3187-5p/5189-5p/6860                             | 3 |
| <i>circAUTS2</i> | miR-6126                                                         | 1 |
| <i>circAUTS2</i> | miR-6131                                                         | 5 |
| <i>circAUTS2</i> | miR-6132/6836-5p                                                 | 3 |

|                  |                     |    |
|------------------|---------------------|----|
| <i>circAUTS2</i> | miR-6134            | 5  |
| <i>circAUTS2</i> | miR-615-5p          | 1  |
| <i>circAUTS2</i> | miR-617             | 3  |
| <i>circAUTS2</i> | miR-619-5p/6506-5p  | 1  |
| <i>circAUTS2</i> | miR-625-5p          | 6  |
| <i>circAUTS2</i> | miR-626/6876-3p     | 2  |
| <i>circAUTS2</i> | miR-628-5p          | 1  |
| <i>circAUTS2</i> | miR-631/3661        | 2  |
| <i>circAUTS2</i> | miR-635/6774-5p     | 1  |
| <i>circAUTS2</i> | miR-637             | 2  |
| <i>circAUTS2</i> | miR-639             | 2  |
| <i>circAUTS2</i> | miR-646             | 4  |
| <i>circAUTS2</i> | miR-648             | 3  |
| <i>circAUTS2</i> | miR-6499-3p         | 3  |
| <i>circAUTS2</i> | miR-6501-3p         | 3  |
| <i>circAUTS2</i> | miR-6505-3p         | 3  |
| <i>circAUTS2</i> | miR-6511-5p         | 3  |
| <i>circAUTS2</i> | miR-6514-5p         | 1  |
| <i>circAUTS2</i> | miR-6515-5p         | 4  |
| <i>circAUTS2</i> | miR-6516-3p         | 1  |
| <i>circAUTS2</i> | miR-652-3p          | 2  |
| <i>circAUTS2</i> | miR-654-3p          | 4  |
| <i>circAUTS2</i> | miR-654-5p          | 13 |
| <i>circAUTS2</i> | miR-655-5p          | 1  |
| <i>circAUTS2</i> | miR-657             | 1  |
| <i>circAUTS2</i> | miR-658             | 1  |
| <i>circAUTS2</i> | miR-661             | 1  |
| <i>circAUTS2</i> | miR-663b            | 3  |
| <i>circAUTS2</i> | miR-664a-5p/4794    | 4  |
| <i>circAUTS2</i> | miR-671-5p          | 2  |
| <i>circAUTS2</i> | miR-6719-3p         | 3  |
| <i>circAUTS2</i> | miR-6721-5p         | 3  |
| <i>circAUTS2</i> | miR-6724-5p/6773-5p | 2  |
| <i>circAUTS2</i> | miR-6728-3p         | 1  |
| <i>circAUTS2</i> | miR-6728-5p         | 3  |
| <i>circAUTS2</i> | miR-6730-3p         | 3  |
| <i>circAUTS2</i> | miR-6731-5p/8085    | 5  |
| <i>circAUTS2</i> | miR-6732-5p         | 5  |

|                  |                             |    |
|------------------|-----------------------------|----|
| <i>circAUTS2</i> | miR-6734-5p                 | 3  |
| <i>circAUTS2</i> | miR-6735-3p                 | 2  |
| <i>circAUTS2</i> | miR-6737-5p/6812-5p/6819-5p | 2  |
| <i>circAUTS2</i> | miR-6738-3p                 | 4  |
| <i>circAUTS2</i> | miR-6740-3p                 | 2  |
| <i>circAUTS2</i> | miR-6742-3p                 | 1  |
| <i>circAUTS2</i> | miR-6742-5p                 | 5  |
| <i>circAUTS2</i> | miR-6747-5p                 | 3  |
| <i>circAUTS2</i> | miR-6748-3p                 | 2  |
| <i>circAUTS2</i> | miR-675-5p/4466             | 1  |
| <i>circAUTS2</i> | miR-6750-5p/6822-5p         | 1  |
| <i>circAUTS2</i> | miR-6751-5p/6803-5p         | 3  |
| <i>circAUTS2</i> | miR-6752-3p                 | 1  |
| <i>circAUTS2</i> | miR-6752-5p/6842-5p/7110-5p | 1  |
| <i>circAUTS2</i> | miR-6760-5p                 | 4  |
| <i>circAUTS2</i> | miR-6761-5p                 | 2  |
| <i>circAUTS2</i> | miR-6762-3p                 | 2  |
| <i>circAUTS2</i> | miR-6762-5p/6845-5p         | 1  |
| <i>circAUTS2</i> | miR-6765-3p                 | 4  |
| <i>circAUTS2</i> | miR-6769a-3p                | 2  |
| <i>circAUTS2</i> | miR-6769a-5p/6769b-5p       | 13 |
| <i>circAUTS2</i> | miR-6770-3p                 | 1  |
| <i>circAUTS2</i> | miR-6770-5p                 | 1  |
| <i>circAUTS2</i> | miR-6772-3p                 | 5  |
| <i>circAUTS2</i> | miR-6772-5p                 | 5  |
| <i>circAUTS2</i> | miR-6773-3p                 | 4  |
| <i>circAUTS2</i> | miR-6776-5p                 | 2  |
| <i>circAUTS2</i> | miR-6777-5p/6889-5p         | 1  |
| <i>circAUTS2</i> | miR-6782-5p                 | 3  |
| <i>circAUTS2</i> | miR-6786-5p                 | 1  |
| <i>circAUTS2</i> | miR-6792-5p                 | 1  |
| <i>circAUTS2</i> | miR-6795-5p/6887-5p         | 3  |
| <i>circAUTS2</i> | miR-6799-5p                 | 5  |
| <i>circAUTS2</i> | miR-6804-3p                 | 1  |
| <i>circAUTS2</i> | miR-6804-5p                 | 1  |
| <i>circAUTS2</i> | miR-6805-5p                 | 5  |
| <i>circAUTS2</i> | miR-6806-5p                 | 1  |
| <i>circAUTS2</i> | miR-6810-5p                 | 2  |

|                  |                     |   |
|------------------|---------------------|---|
| <i>circAUTS2</i> | miR-6815-3p         | 1 |
| <i>circAUTS2</i> | miR-6815-5p/6865-5p | 4 |
| <i>circAUTS2</i> | miR-6817-3p         | 3 |
| <i>circAUTS2</i> | miR-6821-5p         | 1 |
| <i>circAUTS2</i> | miR-6822-3p         | 4 |
| <i>circAUTS2</i> | miR-6823-5p         | 1 |
| <i>circAUTS2</i> | miR-6825-5p         | 2 |
| <i>circAUTS2</i> | miR-6828-5p         | 2 |
| <i>circAUTS2</i> | miR-6829-5p         | 5 |
| <i>circAUTS2</i> | miR-6830-3p         | 1 |
| <i>circAUTS2</i> | miR-6834-5p         | 3 |
| <i>circAUTS2</i> | miR-6835-5p         | 1 |
| <i>circAUTS2</i> | miR-6838-3p         | 2 |
| <i>circAUTS2</i> | miR-6840-3p         | 3 |
| <i>circAUTS2</i> | miR-6846-5p/6848-5p | 2 |
| <i>circAUTS2</i> | miR-6847-5p         | 4 |
| <i>circAUTS2</i> | miR-6850-3p         | 6 |
| <i>circAUTS2</i> | miR-6851-3p         | 2 |
| <i>circAUTS2</i> | miR-6852-5p         | 1 |
| <i>circAUTS2</i> | miR-6853-5p         | 1 |
| <i>circAUTS2</i> | miR-6857-5p         | 2 |
| <i>circAUTS2</i> | miR-6861-5p         | 2 |
| <i>circAUTS2</i> | miR-6864-5p         | 1 |
| <i>circAUTS2</i> | miR-6869-5p         | 3 |
| <i>circAUTS2</i> | miR-6871-3p         | 1 |
| <i>circAUTS2</i> | miR-6871-5p         | 1 |
| <i>circAUTS2</i> | miR-6873-3p         | 2 |
| <i>circAUTS2</i> | miR-6873-5p         | 4 |
| <i>circAUTS2</i> | miR-6874-5p         | 2 |
| <i>circAUTS2</i> | miR-6878-3p         | 3 |
| <i>circAUTS2</i> | miR-6878-5p         | 5 |
| <i>circAUTS2</i> | miR-6880-5p         | 3 |
| <i>circAUTS2</i> | miR-6881-5p         | 1 |
| <i>circAUTS2</i> | miR-6886-5p         | 1 |
| <i>circAUTS2</i> | miR-6889-3p         | 5 |
| <i>circAUTS2</i> | miR-6890-5p         | 1 |
| <i>circAUTS2</i> | miR-6894-5p         | 6 |
| <i>circAUTS2</i> | miR-6895-5p         | 5 |

|                  |                           |    |
|------------------|---------------------------|----|
| <i>circAUTS2</i> | miR-7106-3p               | 4  |
| <i>circAUTS2</i> | miR-7106-5p               | 5  |
| <i>circAUTS2</i> | miR-7108-5p               | 2  |
| <i>circAUTS2</i> | miR-7109-5p               | 3  |
| <i>circAUTS2</i> | miR-7110-3p               | 3  |
| <i>circAUTS2</i> | miR-7113-5p               | 1  |
| <i>circAUTS2</i> | miR-7114-5p               | 4  |
| <i>circAUTS2</i> | miR-7154-3p               | 6  |
| <i>circAUTS2</i> | miR-7155-5p               | 2  |
| <i>circAUTS2</i> | miR-7158-5p               | 2  |
| <i>circAUTS2</i> | miR-7160-3p               | 5  |
| <i>circAUTS2</i> | miR-744-5p                | 2  |
| <i>circAUTS2</i> | miR-758-5p                | 1  |
| <i>circAUTS2</i> | miR-760                   | 4  |
| <i>circAUTS2</i> | miR-762/4492/4498/5001-5p | 5  |
| <i>circAUTS2</i> | miR-764                   | 3  |
| <i>circAUTS2</i> | miR-765                   | 6  |
| <i>circAUTS2</i> | miR-766-5p                | 6  |
| <i>circAUTS2</i> | miR-767-5p                | 2  |
| <i>circAUTS2</i> | miR-770-5p                | 2  |
| <i>circAUTS2</i> | miR-7704                  | 1  |
| <i>circAUTS2</i> | miR-7843-3p               | 2  |
| <i>circAUTS2</i> | miR-7847-3p               | 3  |
| <i>circAUTS2</i> | miR-7854-3p               | 5  |
| <i>circAUTS2</i> | miR-7856-5p               | 1  |
| <i>circAUTS2</i> | miR-7974                  | 4  |
| <i>circAUTS2</i> | miR-7976                  | 2  |
| <i>circAUTS2</i> | miR-7978                  | 6  |
| <i>circAUTS2</i> | miR-8057                  | 2  |
| <i>circAUTS2</i> | miR-8071                  | 3  |
| <i>circAUTS2</i> | miR-8075                  | 1  |
| <i>circAUTS2</i> | miR-8088                  | 1  |
| <i>circAUTS2</i> | miR-876-3p                | 8  |
| <i>circAUTS2</i> | miR-889-5p                | 1  |
| <i>circAUTS2</i> | miR-892a                  | 4  |
| <i>circAUTS2</i> | miR-92a-1-5p              | 3  |
| <i>circAUTS2</i> | miR-92a-2-5p              | 13 |
| <i>circAUTS2</i> | miR-93-3p                 | 5  |

|                  |                          |   |
|------------------|--------------------------|---|
| <i>circAUTS2</i> | miR-933                  | 1 |
| <i>circAUTS2</i> | miR-939-3p               | 1 |
| <i>circAUTS2</i> | miR-939-5p/1343-5p       | 2 |
| <i>circAUTS2</i> | miR-940/6808-5p/6893-5p  | 4 |
| <i>circAUTS2</i> | miR-9500                 | 1 |
| <i>circAUTS2</i> | miR-1-3p/206             | 3 |
| <i>circAUTS2</i> | miR-105-5p               | 2 |
| <i>circAUTS2</i> | miR-1185-5p              | 2 |
| <i>circAUTS2</i> | miR-1244                 | 1 |
| <i>circAUTS2</i> | miR-1247-5p              | 2 |
| <i>circAUTS2</i> | miR-1252-3p              | 4 |
| <i>circAUTS2</i> | miR-126-5p               | 2 |
| <i>circAUTS2</i> | miR-1270                 | 1 |
| <i>circAUTS2</i> | miR-1285-5p              | 1 |
| <i>circAUTS2</i> | miR-1286                 | 3 |
| <i>circAUTS2</i> | miR-1305                 | 1 |
| <i>circAUTS2</i> | miR-135a-3p              | 4 |
| <i>circAUTS2</i> | miR-154-3p/487-3p        | 2 |
| <i>circAUTS2</i> | miR-155-5p               | 2 |
| <i>circAUTS2</i> | miR-181c-3p              | 4 |
| <i>circAUTS2</i> | miR-1825                 | 2 |
| <i>circAUTS2</i> | miR-199-5p               | 2 |
| <i>circAUTS2</i> | miR-203a-3p.1            | 2 |
| <i>circAUTS2</i> | miR-205-3p               | 2 |
| <i>circAUTS2</i> | miR-2053                 | 1 |
| <i>circAUTS2</i> | miR-208-5p               | 2 |
| <i>circAUTS2</i> | miR-2115-3p              | 1 |
| <i>circAUTS2</i> | miR-216a-5p              | 1 |
| <i>circAUTS2</i> | miR-216b-5p              | 1 |
| <i>circAUTS2</i> | miR-217                  | 2 |
| <i>circAUTS2</i> | miR-27b-5p               | 1 |
| <i>circAUTS2</i> | miR-31-5p                | 3 |
| <i>circAUTS2</i> | miR-3117-5p              | 3 |
| <i>circAUTS2</i> | miR-3126-5p              | 2 |
| <i>circAUTS2</i> | miR-3140-3p              | 3 |
| <i>circAUTS2</i> | miR-3148                 | 1 |
| <i>circAUTS2</i> | miR-3153/6733-5p/6739-5p | 2 |
| <i>circAUTS2</i> | miR-3157-5p              | 1 |

|                  |                                    |   |
|------------------|------------------------------------|---|
| <i>circAUTS2</i> | miR-3187-3p                        | 1 |
| <i>circAUTS2</i> | miR-3194-5p                        | 3 |
| <i>circAUTS2</i> | miR-33-5p                          | 1 |
| <i>circAUTS2</i> | miR-338-3p                         | 1 |
| <i>circAUTS2</i> | miR-34a-3p                         | 2 |
| <i>circAUTS2</i> | miR-3605-5p                        | 2 |
| <i>circAUTS2</i> | miR-3606-5p                        | 3 |
| <i>circAUTS2</i> | miR-3617-3p                        | 2 |
| <i>circAUTS2</i> | miR-3646                           | 4 |
| <i>circAUTS2</i> | miR-3671                           | 3 |
| <i>circAUTS2</i> | miR-376-3p                         | 2 |
| <i>circAUTS2</i> | miR-377-3p                         | 3 |
| <i>circAUTS2</i> | miR-379-5p                         | 2 |
| <i>circAUTS2</i> | miR-382-3p                         | 1 |
| <i>circAUTS2</i> | miR-3913-3p                        | 5 |
| <i>circAUTS2</i> | miR-3938                           | 2 |
| <i>circAUTS2</i> | miR-3945                           | 1 |
| <i>circAUTS2</i> | miR-411-5p.2                       | 2 |
| <i>circAUTS2</i> | miR-4253/6862-5p                   | 1 |
| <i>circAUTS2</i> | miR-4263                           | 2 |
| <i>circAUTS2</i> | miR-4264                           | 1 |
| <i>circAUTS2</i> | miR-4266                           | 4 |
| <i>circAUTS2</i> | miR-4268                           | 2 |
| <i>circAUTS2</i> | miR-4272                           | 2 |
| <i>circAUTS2</i> | miR-4278                           | 2 |
| <i>circAUTS2</i> | miR-4328                           | 1 |
| <i>circAUTS2</i> | miR-4419a/4510/6127/6129/6130/6133 | 2 |
| <i>circAUTS2</i> | miR-4433a-5p                       | 4 |
| <i>circAUTS2</i> | miR-4435                           | 1 |
| <i>circAUTS2</i> | miR-4448                           | 2 |
| <i>circAUTS2</i> | miR-4450                           | 2 |
| <i>circAUTS2</i> | miR-4451                           | 2 |
| <i>circAUTS2</i> | miR-4463                           | 2 |
| <i>circAUTS2</i> | miR-4475                           | 2 |
| <i>circAUTS2</i> | miR-4477a                          | 1 |
| <i>circAUTS2</i> | miR-4499                           | 2 |
| <i>circAUTS2</i> | miR-4504                           | 2 |
| <i>circAUTS2</i> | miR-4506                           | 1 |



|                  |                                                                  |   |
|------------------|------------------------------------------------------------------|---|
| <i>circAUTS2</i> | miR-451b                                                         | 1 |
| <i>circAUTS2</i> | miR-4530                                                         | 1 |
| <i>circAUTS2</i> | miR-4531                                                         | 1 |
| <i>circAUTS2</i> | miR-4532                                                         | 1 |
| <i>circAUTS2</i> | miR-4640-5p                                                      | 2 |
| <i>circAUTS2</i> | miR-4650-3p                                                      | 2 |
| <i>circAUTS2</i> | miR-4659a-5p/4659b-5p                                            | 2 |
| <i>circAUTS2</i> | miR-4661-3p                                                      | 3 |
| <i>circAUTS2</i> | miR-4668-5p                                                      | 2 |
| <i>circAUTS2</i> | miR-4691-3p                                                      | 2 |
| <i>circAUTS2</i> | miR-4700-3p                                                      | 1 |
| <i>circAUTS2</i> | miR-4705                                                         | 1 |
| <i>circAUTS2</i> | miR-4710                                                         | 1 |
| <i>circAUTS2</i> | miR-4711-5p                                                      | 1 |
| <i>circAUTS2</i> | miR-4713-3p                                                      | 3 |
| <i>circAUTS2</i> | miR-4715-3p                                                      | 1 |
| <i>circAUTS2</i> | miR-4722-5p                                                      | 3 |
| <i>circAUTS2</i> | miR-4735-5p                                                      | 2 |
| <i>circAUTS2</i> | miR-4766-5p                                                      | 5 |
| <i>circAUTS2</i> | miR-4790-3p                                                      | 4 |
| <i>circAUTS2</i> | miR-4792                                                         | 1 |
| <i>circAUTS2</i> | miR-4797-3p                                                      | 1 |
| <i>circAUTS2</i> | miR-483-5p                                                       | 2 |
| <i>circAUTS2</i> | miR-489-3p                                                       | 4 |
| <i>circAUTS2</i> | miR-5000-5p                                                      | 2 |
| <i>circAUTS2</i> | miR-5003-3p                                                      | 2 |
| <i>circAUTS2</i> | miR-5009-3p                                                      | 1 |
| <i>circAUTS2</i> | miR-502-5p                                                       | 2 |
| <i>circAUTS2</i> | miR-505-3p.1                                                     | 3 |
| <i>circAUTS2</i> | miR-509-3-5p/509-5p/4418                                         | 2 |
| <i>circAUTS2</i> | miR-5100                                                         | 1 |
| <i>circAUTS2</i> | miR-511-3p                                                       | 1 |
| <i>circAUTS2</i> | miR-5191                                                         | 2 |
| <i>circAUTS2</i> | miR-541-5p                                                       | 1 |
| <i>circAUTS2</i> | miR-542-3p                                                       | 2 |
| <i>circAUTS2</i> | miR-548at-5p                                                     | 1 |
| <i>circAUTS2</i> | miR-548av-5p/548k/8054                                           | 1 |
| <i>circAUTS2</i> | miR-548ay-5p/548au-5p/548as-5p/548ar-5p/548aq-5p/548ap-5p/548am- |   |

|                  |                      |   |
|------------------|----------------------|---|
| <i>circAUTS2</i> | miR-548az-5p/548t-5p | 3 |
| <i>circAUTS2</i> | miR-548l             | 1 |
| <i>circAUTS2</i> | miR-548n             | 3 |
| <i>circAUTS2</i> | miR-548p             | 1 |
| <i>circAUTS2</i> | miR-548s             | 1 |
| <i>circAUTS2</i> | miR-548u/7161-5p     | 3 |
| <i>circAUTS2</i> | miR-550b-2-5p        | 3 |
| <i>circAUTS2</i> | miR-551b-5p          | 3 |
| <i>circAUTS2</i> | miR-556-5p           | 2 |
| <i>circAUTS2</i> | miR-5590-5p          | 2 |
| <i>circAUTS2</i> | miR-561-3p           | 1 |
| <i>circAUTS2</i> | miR-562              | 1 |
| <i>circAUTS2</i> | miR-5700             | 2 |
| <i>circAUTS2</i> | miR-575/4676-5p      | 2 |
| <i>circAUTS2</i> | miR-576-5p           | 2 |
| <i>circAUTS2</i> | miR-580-5p           | 2 |
| <i>circAUTS2</i> | miR-586              | 4 |
| <i>circAUTS2</i> | miR-588              | 1 |
| <i>circAUTS2</i> | miR-607              | 3 |
| <i>circAUTS2</i> | miR-6074             | 2 |
| <i>circAUTS2</i> | miR-6077             | 4 |
| <i>circAUTS2</i> | miR-6079             | 2 |
| <i>circAUTS2</i> | miR-6090             | 1 |
| <i>circAUTS2</i> | miR-6124             | 1 |
| <i>circAUTS2</i> | miR-627-3p           | 3 |
| <i>circAUTS2</i> | miR-638              | 3 |
| <i>circAUTS2</i> | miR-641/3617-5p      | 3 |
| <i>circAUTS2</i> | miR-643              | 2 |
| <i>circAUTS2</i> | miR-6505-5p          | 1 |
| <i>circAUTS2</i> | miR-6508-3p          | 2 |
| <i>circAUTS2</i> | miR-6513-3p          | 4 |
| <i>circAUTS2</i> | miR-6715b-3p         | 3 |
| <i>circAUTS2</i> | miR-6729-3p          | 1 |
| <i>circAUTS2</i> | miR-6755-5p          | 1 |
| <i>circAUTS2</i> | miR-6757-3p          | 3 |
| <i>circAUTS2</i> | miR-6757-5p          | 1 |
| <i>circAUTS2</i> | miR-6768-5p          | 1 |
| <i>circAUTS2</i> | miR-6789-5p          | 2 |

|                  |                                       |   |
|------------------|---------------------------------------|---|
| <i>circAUTS2</i> | miR-6809-5p                           | 3 |
| <i>circAUTS2</i> | miR-6824-5p                           | 2 |
| <i>circAUTS2</i> | miR-6841-5p                           | 1 |
| <i>circAUTS2</i> | miR-6858-3p                           | 2 |
| <i>circAUTS2</i> | miR-6863                              | 1 |
| <i>circAUTS2</i> | miR-6890-3p                           | 2 |
| <i>circAUTS2</i> | miR-7-5p                              | 4 |
| <i>circAUTS2</i> | miR-7112-3p                           | 1 |
| <i>circAUTS2</i> | miR-8065                              | 2 |
| <i>circAUTS2</i> | miR-8066                              | 2 |
| <i>circAUTS2</i> | miR-873-3p                            | 2 |
| <i>circAUTS2</i> | miR-873-5p.2                          | 3 |
| <i>circAUTS2</i> | miR-885-5p                            | 1 |
| <i>circAUTS2</i> | miR-920/4300/5591-5p/6726-5p          | 1 |
| <i>circAUTS2</i> | miR-921                               | 3 |
| <i>circAUTS2</i> | miR-944                               | 1 |
| <i>circAUTS2</i> | let-7a-2-3p/let-7g-3p                 | 1 |
| <i>circAUTS2</i> | let-7a-3p/let-7b-3p/let-7f-1-3p/98-3p | 2 |
| <i>circAUTS2</i> | let-7c-3p                             | 1 |
| <i>circAUTS2</i> | let-7f-2-3p/1185-3p                   | 2 |
| <i>circAUTS2</i> | miR-1-5p                              | 1 |
| <i>circAUTS2</i> | miR-10-5p                             | 1 |
| <i>circAUTS2</i> | miR-100-3p                            | 1 |
| <i>circAUTS2</i> | miR-103b                              | 3 |
| <i>circAUTS2</i> | miR-1178-3p                           | 1 |
| <i>circAUTS2</i> | miR-1202/3972                         | 3 |
| <i>circAUTS2</i> | miR-1208                              | 2 |
| <i>circAUTS2</i> | miR-1226-3p                           | 1 |
| <i>circAUTS2</i> | miR-1228-3p                           | 6 |
| <i>circAUTS2</i> | miR-1238-3p                           | 1 |
| <i>circAUTS2</i> | miR-124-5p                            | 2 |
| <i>circAUTS2</i> | miR-1251-3p                           | 1 |
| <i>circAUTS2</i> | miR-1255b-2-3p                        | 3 |
| <i>circAUTS2</i> | miR-1257                              | 1 |
| <i>circAUTS2</i> | miR-1258                              | 1 |
| <i>circAUTS2</i> | miR-126-3p.1                          | 1 |
| <i>circAUTS2</i> | miR-1260a/1260b                       | 1 |
| <i>circAUTS2</i> | miR-1263                              | 1 |

|                  |                                     |   |
|------------------|-------------------------------------|---|
| <i>circAUTS2</i> | miR-1273c                           | 2 |
| <i>circAUTS2</i> | miR-1273d                           | 1 |
| <i>circAUTS2</i> | miR-1276                            | 1 |
| <i>circAUTS2</i> | miR-1284                            | 1 |
| <i>circAUTS2</i> | miR-1289                            | 1 |
| <i>circAUTS2</i> | miR-129-3p                          | 2 |
| <i>circAUTS2</i> | miR-1298-3p                         | 1 |
| <i>circAUTS2</i> | miR-1298-5p                         | 1 |
| <i>circAUTS2</i> | miR-1299                            | 1 |
| <i>circAUTS2</i> | miR-1301-5p/6502-5p                 | 1 |
| <i>circAUTS2</i> | miR-1302/4298                       | 2 |
| <i>circAUTS2</i> | miR-1303                            | 1 |
| <i>circAUTS2</i> | miR-146-5p                          | 1 |
| <i>circAUTS2</i> | miR-1468-3p                         | 1 |
| <i>circAUTS2</i> | miR-146a-3p                         | 2 |
| <i>circAUTS2</i> | miR-1470                            | 1 |
| <i>circAUTS2</i> | miR-147a                            | 2 |
| <i>circAUTS2</i> | miR-148a-5p                         | 1 |
| <i>circAUTS2</i> | miR-150-3p                          | 1 |
| <i>circAUTS2</i> | miR-150-5p                          | 1 |
| <i>circAUTS2</i> | miR-153-3p                          | 3 |
| <i>circAUTS2</i> | miR-1587/3620-5p                    | 2 |
| <i>circAUTS2</i> | miR-17-5p/20-5p/93-5p/106-5p/519-3p | 3 |
| <i>circAUTS2</i> | miR-181-3p/4420                     | 1 |
| <i>circAUTS2</i> | miR-181a-3p                         | 1 |
| <i>circAUTS2</i> | miR-182-5p                          | 1 |
| <i>circAUTS2</i> | miR-185-3p                          | 1 |
| <i>circAUTS2</i> | miR-188-3p                          | 1 |
| <i>circAUTS2</i> | miR-18b-3p                          | 1 |
| <i>circAUTS2</i> | miR-19-3p                           | 1 |
| <i>circAUTS2</i> | miR-19-5p                           | 1 |
| <i>circAUTS2</i> | miR-1911-3p                         | 4 |
| <i>circAUTS2</i> | miR-193b-5p                         | 1 |
| <i>circAUTS2</i> | miR-196a-3p                         | 1 |
| <i>circAUTS2</i> | miR-197-5p/3132                     | 1 |
| <i>circAUTS2</i> | miR-1972                            | 2 |
| <i>circAUTS2</i> | miR-1973                            | 1 |
| <i>circAUTS2</i> | miR-199-3p                          | 1 |

|                  |                    |   |
|------------------|--------------------|---|
| <i>circAUTS2</i> | miR-205-5p         | 2 |
| <i>circAUTS2</i> | miR-2052           | 1 |
| <i>circAUTS2</i> | miR-210-5p         | 1 |
| <i>circAUTS2</i> | miR-2113           | 1 |
| <i>circAUTS2</i> | miR-2116-3p        | 1 |
| <i>circAUTS2</i> | miR-212-5p         | 1 |
| <i>circAUTS2</i> | miR-214-3p/3619-5p | 2 |
| <i>circAUTS2</i> | miR-214-5p         | 1 |
| <i>circAUTS2</i> | miR-222-5p         | 1 |
| <i>circAUTS2</i> | miR-2276-5p        | 2 |
| <i>circAUTS2</i> | miR-23-3p          | 1 |
| <i>circAUTS2</i> | miR-2355-5p        | 2 |
| <i>circAUTS2</i> | miR-2392           | 2 |
| <i>circAUTS2</i> | miR-2681-3p        | 1 |
| <i>circAUTS2</i> | miR-2681-5p        | 1 |
| <i>circAUTS2</i> | miR-26b-3p         | 1 |
| <i>circAUTS2</i> | miR-27-3p          | 1 |
| <i>circAUTS2</i> | miR-28-3p          | 1 |
| <i>circAUTS2</i> | miR-296-3p         | 2 |
| <i>circAUTS2</i> | miR-29a-5p         | 1 |
| <i>circAUTS2</i> | miR-29b-2-5p       | 3 |
| <i>circAUTS2</i> | miR-30-3p          | 2 |
| <i>circAUTS2</i> | miR-302c-5p        | 4 |
| <i>circAUTS2</i> | miR-302f           | 1 |
| <i>circAUTS2</i> | miR-3064-3p        | 1 |
| <i>circAUTS2</i> | miR-3119           | 2 |
| <i>circAUTS2</i> | miR-3120-3p        | 1 |
| <i>circAUTS2</i> | miR-3123           | 4 |
| <i>circAUTS2</i> | miR-3124-3p        | 1 |
| <i>circAUTS2</i> | miR-3126-3p        | 1 |
| <i>circAUTS2</i> | miR-3140-5p        | 1 |
| <i>circAUTS2</i> | miR-3143           | 2 |
| <i>circAUTS2</i> | miR-3146           | 1 |
| <i>circAUTS2</i> | miR-3152-3p        | 1 |
| <i>circAUTS2</i> | miR-3156-3p        | 1 |
| <i>circAUTS2</i> | miR-3157-3p        | 1 |
| <i>circAUTS2</i> | miR-3160-5p        | 1 |
| <i>circAUTS2</i> | miR-3162-3p        | 1 |

|                  |                           |   |
|------------------|---------------------------|---|
| <i>circAUTS2</i> | miR-3174                  | 1 |
| <i>circAUTS2</i> | miR-3176/3922-3p          | 1 |
| <i>circAUTS2</i> | miR-3180-5p               | 1 |
| <i>circAUTS2</i> | miR-3183/4723-3p/6769b-3p | 1 |
| <i>circAUTS2</i> | miR-3185                  | 1 |
| <i>circAUTS2</i> | miR-3189-3p               | 1 |
| <i>circAUTS2</i> | miR-3190-5p               | 1 |
| <i>circAUTS2</i> | miR-32-3p                 | 3 |
| <i>circAUTS2</i> | miR-320                   | 2 |
| <i>circAUTS2</i> | miR-323-3p                | 1 |
| <i>circAUTS2</i> | miR-323b-3p               | 1 |
| <i>circAUTS2</i> | miR-326                   | 2 |
| <i>circAUTS2</i> | miR-329-3p/362-3p         | 4 |
| <i>circAUTS2</i> | miR-330-3p                | 1 |
| <i>circAUTS2</i> | miR-331-3p                | 2 |
| <i>circAUTS2</i> | miR-335-3p                | 1 |
| <i>circAUTS2</i> | miR-335-5p                | 1 |
| <i>circAUTS2</i> | miR-337-3p                | 1 |
| <i>circAUTS2</i> | miR-33a-3p                | 2 |
| <i>circAUTS2</i> | miR-342-3p                | 1 |
| <i>circAUTS2</i> | miR-345-3p                | 1 |
| <i>circAUTS2</i> | miR-3591-5p               | 1 |
| <i>circAUTS2</i> | miR-361-3p                | 1 |
| <i>circAUTS2</i> | miR-3614-3p               | 1 |
| <i>circAUTS2</i> | miR-3618                  | 1 |
| <i>circAUTS2</i> | miR-3620-3p               | 1 |
| <i>circAUTS2</i> | miR-3662                  | 2 |
| <i>circAUTS2</i> | miR-3663-3p               | 1 |
| <i>circAUTS2</i> | miR-3667-3p               | 1 |
| <i>circAUTS2</i> | miR-3672/6864-3p          | 1 |
| <i>circAUTS2</i> | miR-3679-3p               | 1 |
| <i>circAUTS2</i> | miR-3683                  | 2 |
| <i>circAUTS2</i> | miR-3692-3p               | 1 |
| <i>circAUTS2</i> | miR-374-5p                | 1 |
| <i>circAUTS2</i> | miR-374a-3p               | 1 |
| <i>circAUTS2</i> | miR-376c-3p               | 3 |
| <i>circAUTS2</i> | miR-381-3p                | 1 |
| <i>circAUTS2</i> | miR-3908                  | 1 |

|                  |                    |   |
|------------------|--------------------|---|
| <i>circAUTS2</i> | miR-3912-5p        | 1 |
| <i>circAUTS2</i> | miR-3925-3p        | 1 |
| <i>circAUTS2</i> | miR-3925-5p        | 4 |
| <i>circAUTS2</i> | miR-3928-3p        | 1 |
| <i>circAUTS2</i> | miR-3934-3p        | 1 |
| <i>circAUTS2</i> | miR-3937           | 2 |
| <i>circAUTS2</i> | miR-3940-5p/4507   | 1 |
| <i>circAUTS2</i> | miR-3942-3p        | 3 |
| <i>circAUTS2</i> | miR-3942-5p        | 1 |
| <i>circAUTS2</i> | miR-409-3p         | 1 |
| <i>circAUTS2</i> | miR-409-5p         | 2 |
| <i>circAUTS2</i> | miR-412-3p/6754-3p | 1 |
| <i>circAUTS2</i> | miR-425-5p         | 1 |
| <i>circAUTS2</i> | miR-4267           | 2 |
| <i>circAUTS2</i> | miR-4286           | 2 |
| <i>circAUTS2</i> | miR-4290           | 1 |
| <i>circAUTS2</i> | miR-4292/6791-5p   | 5 |
| <i>circAUTS2</i> | miR-4293           | 2 |
| <i>circAUTS2</i> | miR-4294           | 1 |
| <i>circAUTS2</i> | miR-4301           | 2 |
| <i>circAUTS2</i> | miR-4308           | 5 |
| <i>circAUTS2</i> | miR-4311           | 1 |
| <i>circAUTS2</i> | miR-4312           | 1 |
| <i>circAUTS2</i> | miR-4314           | 2 |
| <i>circAUTS2</i> | miR-432-3p         | 2 |
| <i>circAUTS2</i> | miR-433-3p         | 1 |
| <i>circAUTS2</i> | miR-4423-5p        | 1 |
| <i>circAUTS2</i> | miR-4427           | 1 |
| <i>circAUTS2</i> | miR-4433b-3p       | 1 |
| <i>circAUTS2</i> | miR-4433b-5p       | 3 |
| <i>circAUTS2</i> | miR-4446-5p        | 1 |
| <i>circAUTS2</i> | miR-4449           | 1 |
| <i>circAUTS2</i> | miR-4457           | 1 |
| <i>circAUTS2</i> | miR-4473           | 1 |
| <i>circAUTS2</i> | miR-4476/6876-5p   | 2 |
| <i>circAUTS2</i> | miR-448            | 3 |
| <i>circAUTS2</i> | miR-4480           | 1 |
| <i>circAUTS2</i> | miR-4481/4745-5p   | 1 |

|                  |                  |   |
|------------------|------------------|---|
| <i>circAUTS2</i> | miR-4482-3p      | 1 |
| <i>circAUTS2</i> | miR-4511         | 1 |
| <i>circAUTS2</i> | miR-4521         | 1 |
| <i>circAUTS2</i> | miR-4527/6503-5p | 3 |
| <i>circAUTS2</i> | miR-4528         | 1 |
| <i>circAUTS2</i> | miR-4536-3p      | 1 |
| <i>circAUTS2</i> | miR-4536-5p      | 2 |
| <i>circAUTS2</i> | miR-455-5p       | 1 |
| <i>circAUTS2</i> | miR-4637         | 1 |
| <i>circAUTS2</i> | miR-4642         | 1 |
| <i>circAUTS2</i> | miR-4645-5p/4673 | 4 |
| <i>circAUTS2</i> | miR-4650-5p      | 2 |
| <i>circAUTS2</i> | miR-4652-3p      | 2 |
| <i>circAUTS2</i> | miR-4655-3p      | 1 |
| <i>circAUTS2</i> | miR-4655-5p      | 1 |
| <i>circAUTS2</i> | miR-466          | 2 |
| <i>circAUTS2</i> | miR-4666a-3p     | 1 |
| <i>circAUTS2</i> | miR-4666a-5p     | 1 |
| <i>circAUTS2</i> | miR-4667-3p      | 1 |
| <i>circAUTS2</i> | miR-4670-3p      | 1 |
| <i>circAUTS2</i> | miR-4670-5p      | 2 |
| <i>circAUTS2</i> | miR-4671-3p      | 1 |
| <i>circAUTS2</i> | miR-4674         | 2 |
| <i>circAUTS2</i> | miR-4677-3p      | 2 |
| <i>circAUTS2</i> | miR-4679         | 2 |
| <i>circAUTS2</i> | miR-4680-3p      | 1 |
| <i>circAUTS2</i> | miR-4686         | 2 |
| <i>circAUTS2</i> | miR-4687-5p      | 2 |
| <i>circAUTS2</i> | miR-4690-5p      | 1 |
| <i>circAUTS2</i> | miR-4694-5p      | 1 |
| <i>circAUTS2</i> | miR-4699-5p      | 1 |
| <i>circAUTS2</i> | miR-4703-3p      | 1 |
| <i>circAUTS2</i> | miR-4704-3p      | 1 |
| <i>circAUTS2</i> | miR-4704-5p      | 1 |
| <i>circAUTS2</i> | miR-4707-5p      | 1 |
| <i>circAUTS2</i> | miR-4709-3p      | 1 |
| <i>circAUTS2</i> | miR-4713-5p      | 2 |
| <i>circAUTS2</i> | miR-4719         | 1 |



|                  |                     |   |
|------------------|---------------------|---|
| <i>circAUTS2</i> | miR-4727-5p         | 2 |
| <i>circAUTS2</i> | miR-4732-5p         | 1 |
| <i>circAUTS2</i> | miR-4733-3p         | 1 |
| <i>circAUTS2</i> | miR-4733-5p         | 1 |
| <i>circAUTS2</i> | miR-4737            | 1 |
| <i>circAUTS2</i> | miR-4738-5p         | 1 |
| <i>circAUTS2</i> | miR-4743-3p         | 2 |
| <i>circAUTS2</i> | miR-4749-3p         | 1 |
| <i>circAUTS2</i> | miR-4755-3p         | 2 |
| <i>circAUTS2</i> | miR-4755-5p/5006-3p | 3 |
| <i>circAUTS2</i> | miR-4762-5p         | 2 |
| <i>circAUTS2</i> | miR-4764-3p         | 2 |
| <i>circAUTS2</i> | miR-4764-5p         | 2 |
| <i>circAUTS2</i> | miR-4766-3p         | 1 |
| <i>circAUTS2</i> | miR-4769-3p/6817-5p | 3 |
| <i>circAUTS2</i> | miR-4773            | 2 |
| <i>circAUTS2</i> | miR-4776-3p         | 1 |
| <i>circAUTS2</i> | miR-4781-3p         | 1 |
| <i>circAUTS2</i> | miR-4782-5p/5706    | 1 |
| <i>circAUTS2</i> | miR-4783-3p         | 1 |
| <i>circAUTS2</i> | miR-4786-5p         | 1 |
| <i>circAUTS2</i> | miR-4789-5p         | 2 |
| <i>circAUTS2</i> | miR-486-5p          | 1 |
| <i>circAUTS2</i> | miR-487a-5p/487b-5p | 3 |
| <i>circAUTS2</i> | miR-493-5p          | 1 |
| <i>circAUTS2</i> | miR-494-3p          | 2 |
| <i>circAUTS2</i> | miR-495-3p          | 2 |
| <i>circAUTS2</i> | miR-497-3p          | 2 |
| <i>circAUTS2</i> | miR-499a-3p/499b-3p | 2 |
| <i>circAUTS2</i> | miR-5001-3p         | 2 |
| <i>circAUTS2</i> | miR-5004-3p         | 2 |
| <i>circAUTS2</i> | miR-5006-5p         | 3 |
| <i>circAUTS2</i> | miR-5010-3p         | 1 |
| <i>circAUTS2</i> | miR-504-5p.1        | 1 |
| <i>circAUTS2</i> | miR-5087            | 1 |
| <i>circAUTS2</i> | miR-5089-3p         | 1 |
| <i>circAUTS2</i> | miR-5093            | 1 |
| <i>circAUTS2</i> | miR-5094            | 1 |

|                  |                                      |   |
|------------------|--------------------------------------|---|
| <i>circAUTS2</i> | miR-5096                             | 2 |
| <i>circAUTS2</i> | miR-513a-3p/513c-3p/3606-3p          | 1 |
| <i>circAUTS2</i> | miR-513a-5p                          | 1 |
| <i>circAUTS2</i> | miR-513b-3p                          | 1 |
| <i>circAUTS2</i> | miR-513b-5p                          | 1 |
| <i>circAUTS2</i> | miR-514a-3p                          | 1 |
| <i>circAUTS2</i> | miR-516b-5p                          | 1 |
| <i>circAUTS2</i> | miR-5187-3p                          | 1 |
| <i>circAUTS2</i> | miR-518a-5p/527                      | 2 |
| <i>circAUTS2</i> | miR-518c-5p                          | 2 |
| <i>circAUTS2</i> | miR-5190                             | 1 |
| <i>circAUTS2</i> | miR-5195-5p                          | 1 |
| <i>circAUTS2</i> | miR-5197-3p                          | 2 |
| <i>circAUTS2</i> | miR-519d-5p                          | 2 |
| <i>circAUTS2</i> | miR-520f-5p                          | 1 |
| <i>circAUTS2</i> | miR-525-5p                           | 1 |
| <i>circAUTS2</i> | miR-526b-5p                          | 1 |
| <i>circAUTS2</i> | miR-532-3p                           | 1 |
| <i>circAUTS2</i> | miR-532-5p                           | 1 |
| <i>circAUTS2</i> | miR-539-5p                           | 2 |
| <i>circAUTS2</i> | miR-548ah-5p/3609                    | 3 |
| <i>circAUTS2</i> | miR-548aj-5p/548f-5p/548g-5p/548x-5p | 1 |
| <i>circAUTS2</i> | miR-548al/4445-3p                    | 1 |
| <i>circAUTS2</i> | miR-548ap-3p/548aa/548t-3p           | 2 |
| <i>circAUTS2</i> | miR-548as-3p                         | 2 |
| <i>circAUTS2</i> | miR-548aw                            | 2 |
| <i>circAUTS2</i> | miR-548ay-3p/548at-3p                | 2 |
| <i>circAUTS2</i> | miR-548b-3p                          | 1 |
| <i>circAUTS2</i> | miR-548e-5p                          | 1 |
| <i>circAUTS2</i> | miR-549a                             | 1 |
| <i>circAUTS2</i> | miR-5586-3p                          | 2 |
| <i>circAUTS2</i> | miR-5586-5p                          | 1 |
| <i>circAUTS2</i> | miR-5587-3p                          | 1 |
| <i>circAUTS2</i> | miR-5682                             | 3 |
| <i>circAUTS2</i> | miR-5695                             | 2 |
| <i>circAUTS2</i> | miR-570-3p                           | 2 |
| <i>circAUTS2</i> | miR-5702                             | 3 |
| <i>circAUTS2</i> | miR-583                              | 1 |

|                  |                  |   |
|------------------|------------------|---|
| <i>circAUTS2</i> | miR-585-5p       | 3 |
| <i>circAUTS2</i> | miR-587          | 2 |
| <i>circAUTS2</i> | miR-589-5p       | 1 |
| <i>circAUTS2</i> | miR-590-3p       | 1 |
| <i>circAUTS2</i> | miR-592          | 1 |
| <i>circAUTS2</i> | miR-593-3p       | 1 |
| <i>circAUTS2</i> | miR-595          | 3 |
| <i>circAUTS2</i> | miR-596          | 2 |
| <i>circAUTS2</i> | miR-599          | 1 |
| <i>circAUTS2</i> | miR-600          | 1 |
| <i>circAUTS2</i> | miR-603          | 4 |
| <i>circAUTS2</i> | miR-610          | 1 |
| <i>circAUTS2</i> | miR-6128         | 1 |
| <i>circAUTS2</i> | miR-615-3p       | 2 |
| <i>circAUTS2</i> | miR-6165         | 1 |
| <i>circAUTS2</i> | miR-618          | 1 |
| <i>circAUTS2</i> | miR-619-3p       | 1 |
| <i>circAUTS2</i> | miR-624-3p       | 1 |
| <i>circAUTS2</i> | miR-625-3p       | 1 |
| <i>circAUTS2</i> | miR-629-5p       | 1 |
| <i>circAUTS2</i> | miR-6501-5p      | 1 |
| <i>circAUTS2</i> | miR-6502-3p      | 1 |
| <i>circAUTS2</i> | miR-6508-5p/8067 | 1 |
| <i>circAUTS2</i> | miR-651-3p       | 1 |
| <i>circAUTS2</i> | miR-651-5p       | 2 |
| <i>circAUTS2</i> | miR-6510-5p      | 1 |
| <i>circAUTS2</i> | miR-6514-3p      | 1 |
| <i>circAUTS2</i> | miR-653-3p       | 1 |
| <i>circAUTS2</i> | miR-653-5p       | 2 |
| <i>circAUTS2</i> | miR-659-3p       | 1 |
| <i>circAUTS2</i> | miR-660-5p       | 1 |
| <i>circAUTS2</i> | miR-662          | 1 |
| <i>circAUTS2</i> | miR-668-3p       | 1 |
| <i>circAUTS2</i> | miR-670-3p       | 1 |
| <i>circAUTS2</i> | miR-670-5p       | 3 |
| <i>circAUTS2</i> | miR-671-3p       | 1 |
| <i>circAUTS2</i> | miR-6715a-3p     | 2 |
| <i>circAUTS2</i> | miR-6717-5p      | 2 |

|                  |                     |   |
|------------------|---------------------|---|
| <i>circAUTS2</i> | miR-6720-5p         | 1 |
| <i>circAUTS2</i> | miR-6734-3p         | 1 |
| <i>circAUTS2</i> | miR-6736-3p         | 2 |
| <i>circAUTS2</i> | miR-6750-3p         | 1 |
| <i>circAUTS2</i> | miR-6753-3p/7107-3p | 3 |
| <i>circAUTS2</i> | miR-6753-5p         | 1 |
| <i>circAUTS2</i> | miR-6758-3p         | 2 |
| <i>circAUTS2</i> | miR-676-3p          | 2 |
| <i>circAUTS2</i> | miR-6760-3p         | 2 |
| <i>circAUTS2</i> | miR-6763-3p         | 1 |
| <i>circAUTS2</i> | miR-6764-3p/6824-3p | 2 |
| <i>circAUTS2</i> | miR-6767-3p         | 1 |
| <i>circAUTS2</i> | miR-6776-3p         | 3 |
| <i>circAUTS2</i> | miR-6777-3p         | 1 |
| <i>circAUTS2</i> | miR-6778-3p         | 1 |
| <i>circAUTS2</i> | miR-6779-3p         | 2 |
| <i>circAUTS2</i> | miR-6780a-3p        | 1 |
| <i>circAUTS2</i> | miR-6783-5p         | 1 |
| <i>circAUTS2</i> | miR-6791-3p/6829-3p | 1 |
| <i>circAUTS2</i> | miR-6793-3p         | 1 |
| <i>circAUTS2</i> | miR-6794-3p         | 1 |
| <i>circAUTS2</i> | miR-6795-3p         | 2 |
| <i>circAUTS2</i> | miR-6801-3p/6810-3p | 2 |
| <i>circAUTS2</i> | miR-6803-3p         | 1 |
| <i>circAUTS2</i> | miR-6811-3p         | 1 |
| <i>circAUTS2</i> | miR-6814-3p/6872-5p | 1 |
| <i>circAUTS2</i> | miR-6818-5p         | 2 |
| <i>circAUTS2</i> | miR-6825-3p         | 1 |
| <i>circAUTS2</i> | miR-6826-3p         | 1 |
| <i>circAUTS2</i> | miR-6826-5p         | 1 |
| <i>circAUTS2</i> | miR-6827-5p         | 1 |
| <i>circAUTS2</i> | miR-6830-5p         | 1 |
| <i>circAUTS2</i> | miR-6832-3p         | 1 |
| <i>circAUTS2</i> | miR-6832-5p         | 1 |
| <i>circAUTS2</i> | miR-6836-3p         | 2 |
| <i>circAUTS2</i> | miR-6837-3p         | 1 |
| <i>circAUTS2</i> | miR-6839-3p         | 1 |
| <i>circAUTS2</i> | miR-6845-3p         | 3 |

|                  |             |   |
|------------------|-------------|---|
| <i>circAUTS2</i> | miR-6846-3p | 1 |
| <i>circAUTS2</i> | miR-6847-3p | 1 |
| <i>circAUTS2</i> | miR-6854-5p | 1 |
| <i>circAUTS2</i> | miR-6856-3p | 1 |
| <i>circAUTS2</i> | miR-6859-3p | 1 |
| <i>circAUTS2</i> | miR-6865-3p | 1 |
| <i>circAUTS2</i> | miR-6867-3p | 2 |
| <i>circAUTS2</i> | miR-6867-5p | 2 |
| <i>circAUTS2</i> | miR-6872-3p | 1 |
| <i>circAUTS2</i> | miR-6881-3p | 1 |
| <i>circAUTS2</i> | miR-6882-3p | 2 |
| <i>circAUTS2</i> | miR-6882-5p | 1 |
| <i>circAUTS2</i> | miR-6884-3p | 1 |
| <i>circAUTS2</i> | miR-6885-3p | 2 |
| <i>circAUTS2</i> | miR-6886-3p | 1 |
| <i>circAUTS2</i> | miR-6887-3p | 2 |
| <i>circAUTS2</i> | miR-6888-3p | 2 |
| <i>circAUTS2</i> | miR-6888-5p | 2 |
| <i>circAUTS2</i> | miR-6892-3p | 2 |
| <i>circAUTS2</i> | miR-6892-5p | 1 |
| <i>circAUTS2</i> | miR-6894-3p | 1 |
| <i>circAUTS2</i> | miR-6895-3p | 1 |
| <i>circAUTS2</i> | miR-7-3p    | 2 |
| <i>circAUTS2</i> | miR-708-3p  | 1 |
| <i>circAUTS2</i> | miR-7109-3p | 3 |
| <i>circAUTS2</i> | miR-7111-3p | 1 |
| <i>circAUTS2</i> | miR-7151-5p | 1 |
| <i>circAUTS2</i> | miR-7154-5p | 1 |
| <i>circAUTS2</i> | miR-7159-3p | 1 |
| <i>circAUTS2</i> | miR-744-3p  | 1 |
| <i>circAUTS2</i> | miR-766-3p  | 1 |
| <i>circAUTS2</i> | miR-769-5p  | 1 |
| <i>circAUTS2</i> | miR-7702    | 1 |
| <i>circAUTS2</i> | miR-7705    | 1 |
| <i>circAUTS2</i> | miR-7844-5p | 1 |
| <i>circAUTS2</i> | miR-7848-3p | 2 |
| <i>circAUTS2</i> | miR-7849-3p | 1 |
| <i>circAUTS2</i> | miR-7850-5p | 2 |

|                  |                       |   |
|------------------|-----------------------|---|
| <i>circAUTS2</i> | miR-7851-3p           | 1 |
| <i>circAUTS2</i> | miR-7977              | 2 |
| <i>circAUTS2</i> | miR-8053              | 2 |
| <i>circAUTS2</i> | miR-8055              | 1 |
| <i>circAUTS2</i> | miR-8064              | 3 |
| <i>circAUTS2</i> | miR-8081              | 1 |
| <i>circAUTS2</i> | miR-8485              | 4 |
| <i>circAUTS2</i> | miR-874-3p            | 1 |
| <i>circAUTS2</i> | miR-875-3p            | 1 |
| <i>circAUTS2</i> | miR-888-5p            | 1 |
| <i>circAUTS2</i> | miR-890               | 1 |
| <i>circAUTS2</i> | miR-891a-5p           | 1 |
| <i>circAUTS2</i> | miR-9-3p              | 1 |
| <i>circAUTS2</i> | miR-922               | 2 |
| <i>circAUTS2</i> | miR-934               | 1 |
| <i>circAUTS2</i> | miR-936               | 1 |
| <i>circAUTS2</i> | miR-938               | 1 |
| <i>circAUTS2</i> | miR-942-3p            | 2 |
| <i>circAUTS2</i> | miR-96-3p             | 1 |
| <i>circAUTS2</i> | miR-96-5p/1271-5p     | 1 |
| <i>circBAZ2B</i> | let-7a-2-3p/let-7g-3p | 1 |
| <i>circBAZ2B</i> | let-7c-3p             | 1 |
| <i>circBAZ2B</i> | miR-10-5p             | 1 |
| <i>circBAZ2B</i> | miR-100-3p            | 2 |
| <i>circBAZ2B</i> | miR-101-3p.2          | 2 |
| <i>circBAZ2B</i> | miR-103-3p/107        | 4 |
| <i>circBAZ2B</i> | miR-103a-2-5p         | 1 |
| <i>circBAZ2B</i> | miR-105-5p            | 2 |
| <i>circBAZ2B</i> | miR-1178-3p           | 2 |
| <i>circBAZ2B</i> | miR-1179              | 2 |
| <i>circBAZ2B</i> | miR-1180-5p           | 1 |
| <i>circBAZ2B</i> | miR-1184              | 1 |
| <i>circBAZ2B</i> | miR-1185-5p           | 1 |
| <i>circBAZ2B</i> | miR-1199-5p/6751-3p   | 2 |
| <i>circBAZ2B</i> | miR-1200              | 3 |
| <i>circBAZ2B</i> | miR-1202/3972         | 2 |
| <i>circBAZ2B</i> | miR-1205              | 1 |
| <i>circBAZ2B</i> | miR-1207-3p           | 4 |

|                  |                          |    |
|------------------|--------------------------|----|
| <i>circBAZ2B</i> | miR-1208                 | 3  |
| <i>circBAZ2B</i> | miR-1224-5p              | 2  |
| <i>circBAZ2B</i> | miR-1226-3p              | 2  |
| <i>circBAZ2B</i> | miR-1228-3p              | 3  |
| <i>circBAZ2B</i> | miR-1229-3p              | 1  |
| <i>circBAZ2B</i> | miR-1233-3p              | 1  |
| <i>circBAZ2B</i> | miR-1236-3p              | 3  |
| <i>circBAZ2B</i> | miR-1236-5p              | 3  |
| <i>circBAZ2B</i> | miR-1238-5p/4758-5p      | 9  |
| <i>circBAZ2B</i> | miR-124-3p.1             | 4  |
| <i>circBAZ2B</i> | miR-124-5p               | 2  |
| <i>circBAZ2B</i> | miR-1243                 | 2  |
| <i>circBAZ2B</i> | miR-1245a/8079           | 3  |
| <i>circBAZ2B</i> | miR-1246                 | 4  |
| <i>circBAZ2B</i> | miR-1247-5p              | 2  |
| <i>circBAZ2B</i> | miR-1250-3p              | 2  |
| <i>circBAZ2B</i> | miR-1251-3p              | 5  |
| <i>circBAZ2B</i> | miR-1252-3p              | 1  |
| <i>circBAZ2B</i> | miR-1252-5p              | 5  |
| <i>circBAZ2B</i> | miR-1253                 | 1  |
| <i>circBAZ2B</i> | miR-1255a/1255b-5p       | 3  |
| <i>circBAZ2B</i> | miR-1256                 | 2  |
| <i>circBAZ2B</i> | miR-1257                 | 6  |
| <i>circBAZ2B</i> | miR-1258                 | 1  |
| <i>circBAZ2B</i> | miR-125a-3p              | 2  |
| <i>circBAZ2B</i> | miR-126-5p               | 2  |
| <i>circBAZ2B</i> | miR-1261                 | 1  |
| <i>circBAZ2B</i> | miR-1262/4701-3p/6736-5p | 5  |
| <i>circBAZ2B</i> | miR-1264                 | 2  |
| <i>circBAZ2B</i> | miR-1265                 | 3  |
| <i>circBAZ2B</i> | miR-1266-3p              | 1  |
| <i>circBAZ2B</i> | miR-1267                 | 2  |
| <i>circBAZ2B</i> | miR-1270                 | 10 |
| <i>circBAZ2B</i> | miR-1272                 | 8  |
| <i>circBAZ2B</i> | miR-1273a                | 2  |
| <i>circBAZ2B</i> | miR-1273c                | 2  |
| <i>circBAZ2B</i> | miR-1273e                | 3  |
| <i>circBAZ2B</i> | miR-1273g-3p             | 3  |

|                  |                          |   |
|------------------|--------------------------|---|
| <i>circBAZ2B</i> | miR-1273g-5p             | 1 |
| <i>circBAZ2B</i> | miR-1275/4665-5p         | 1 |
| <i>circBAZ2B</i> | miR-1276                 | 4 |
| <i>circBAZ2B</i> | miR-1277-5p              | 7 |
| <i>circBAZ2B</i> | miR-128-3p               | 1 |
| <i>circBAZ2B</i> | miR-1284                 | 1 |
| <i>circBAZ2B</i> | miR-1285-5p              | 1 |
| <i>circBAZ2B</i> | miR-1287-5p              | 1 |
| <i>circBAZ2B</i> | miR-1288-5p              | 3 |
| <i>circBAZ2B</i> | miR-129-5p               | 1 |
| <i>circBAZ2B</i> | miR-1290                 | 5 |
| <i>circBAZ2B</i> | miR-1293/4483            | 1 |
| <i>circBAZ2B</i> | miR-1294                 | 4 |
| <i>circBAZ2B</i> | miR-1295b-5p/1912        | 1 |
| <i>circBAZ2B</i> | miR-1298-3p              | 1 |
| <i>circBAZ2B</i> | miR-1298-5p              | 3 |
| <i>circBAZ2B</i> | miR-1299                 | 2 |
| <i>circBAZ2B</i> | miR-130-3p/301-3p/454-3p | 2 |
| <i>circBAZ2B</i> | miR-1301-3p              | 3 |
| <i>circBAZ2B</i> | miR-1302/4298            | 1 |
| <i>circBAZ2B</i> | miR-1303                 | 2 |
| <i>circBAZ2B</i> | miR-1304-3p              | 1 |
| <i>circBAZ2B</i> | miR-1304-5p              | 1 |
| <i>circBAZ2B</i> | miR-130b-5p              | 2 |
| <i>circBAZ2B</i> | miR-132-3p/212-3p        | 1 |
| <i>circBAZ2B</i> | miR-1322                 | 8 |
| <i>circBAZ2B</i> | miR-1323                 | 4 |
| <i>circBAZ2B</i> | miR-133a-3p.1            | 1 |
| <i>circBAZ2B</i> | miR-133a-5p              | 1 |
| <i>circBAZ2B</i> | miR-134-3p               | 2 |
| <i>circBAZ2B</i> | miR-134-5p               | 1 |
| <i>circBAZ2B</i> | miR-1343-3p              | 4 |
| <i>circBAZ2B</i> | miR-135a-3p              | 3 |
| <i>circBAZ2B</i> | miR-135b-3p              | 2 |
| <i>circBAZ2B</i> | miR-136-3p               | 2 |
| <i>circBAZ2B</i> | miR-138-2-3p             | 2 |
| <i>circBAZ2B</i> | miR-138-5p               | 1 |
| <i>circBAZ2B</i> | miR-139-5p               | 1 |



|                  |                                      |    |
|------------------|--------------------------------------|----|
| <i>circBAZ2B</i> | miR-140-3p.1                         | 1  |
| <i>circBAZ2B</i> | miR-140-3p.2                         | 1  |
| <i>circBAZ2B</i> | miR-140-5p                           | 1  |
| <i>circBAZ2B</i> | miR-141-5p                           | 1  |
| <i>circBAZ2B</i> | miR-142-3p.2                         | 3  |
| <i>circBAZ2B</i> | miR-143-5p                           | 3  |
| <i>circBAZ2B</i> | miR-144-5p                           | 1  |
| <i>circBAZ2B</i> | miR-145-3p                           | 4  |
| <i>circBAZ2B</i> | miR-145-5p                           | 1  |
| <i>circBAZ2B</i> | miR-146-5p                           | 6  |
| <i>circBAZ2B</i> | miR-1468-3p                          | 3  |
| <i>circBAZ2B</i> | miR-1468-5p                          | 1  |
| <i>circBAZ2B</i> | miR-146a-3p                          | 3  |
| <i>circBAZ2B</i> | miR-148-3p/152-3p                    | 2  |
| <i>circBAZ2B</i> | miR-148a-5p                          | 1  |
| <i>circBAZ2B</i> | miR-148b-5p/6874-3p                  | 3  |
| <i>circBAZ2B</i> | miR-149-3p/4728-5p/6785-5p/6883-5p   | 3  |
| <i>circBAZ2B</i> | miR-149-5p                           | 7  |
| <i>circBAZ2B</i> | miR-15-5p/16-5p/195-5p/424-5p/497-5p | 3  |
| <i>circBAZ2B</i> | miR-153-5p                           | 2  |
| <i>circBAZ2B</i> | miR-1537-5p                          | 5  |
| <i>circBAZ2B</i> | miR-154-5p                           | 1  |
| <i>circBAZ2B</i> | miR-155-5p                           | 2  |
| <i>circBAZ2B</i> | miR-1587/3620-5p                     | 2  |
| <i>circBAZ2B</i> | miR-15b-3p                           | 1  |
| <i>circBAZ2B</i> | miR-17-3p                            | 1  |
| <i>circBAZ2B</i> | miR-17-5p/20-5p/93-5p/106-5p/519-3p  | 3  |
| <i>circBAZ2B</i> | miR-18-5p                            | 2  |
| <i>circBAZ2B</i> | miR-181-3p/4420                      | 2  |
| <i>circBAZ2B</i> | miR-181-5p                           | 1  |
| <i>circBAZ2B</i> | miR-181a-2-3p                        | 1  |
| <i>circBAZ2B</i> | miR-182-3p                           | 1  |
| <i>circBAZ2B</i> | miR-183-5p.1                         | 1  |
| <i>circBAZ2B</i> | miR-185-5p                           | 5  |
| <i>circBAZ2B</i> | miR-186-5p                           | 10 |
| <i>circBAZ2B</i> | miR-188-5p                           | 1  |
| <i>circBAZ2B</i> | miR-19-3p                            | 3  |
| <i>circBAZ2B</i> | miR-19-5p                            | 3  |

|                  |                      |   |
|------------------|----------------------|---|
| <i>circBAZ2B</i> | miR-190-5p           | 1 |
| <i>circBAZ2B</i> | miR-191-5p           | 2 |
| <i>circBAZ2B</i> | miR-1910-3p/6511a-5p | 2 |
| <i>circBAZ2B</i> | miR-1910-5p          | 3 |
| <i>circBAZ2B</i> | miR-1911-3p          | 2 |
| <i>circBAZ2B</i> | miR-1914-5p          | 1 |
| <i>circBAZ2B</i> | miR-193-3p           | 4 |
| <i>circBAZ2B</i> | miR-194-3p           | 1 |
| <i>circBAZ2B</i> | miR-196-5p           | 3 |
| <i>circBAZ2B</i> | miR-196b-3p          | 3 |
| <i>circBAZ2B</i> | miR-1976             | 2 |
| <i>circBAZ2B</i> | miR-198              | 4 |
| <i>circBAZ2B</i> | miR-199-3p           | 4 |
| <i>circBAZ2B</i> | miR-200-3p/429       | 1 |
| <i>circBAZ2B</i> | miR-200ab-5p         | 1 |
| <i>circBAZ2B</i> | miR-200c-5p/550a-3p  | 1 |
| <i>circBAZ2B</i> | miR-202-5p           | 3 |
| <i>circBAZ2B</i> | miR-203a-3p.1        | 7 |
| <i>circBAZ2B</i> | miR-203a-5p          | 1 |
| <i>circBAZ2B</i> | miR-203b-3p          | 3 |
| <i>circBAZ2B</i> | miR-203b-5p/6718-5p  | 3 |
| <i>circBAZ2B</i> | miR-204-3p/4646-5p   | 1 |
| <i>circBAZ2B</i> | miR-204-5p/211-5p    | 1 |
| <i>circBAZ2B</i> | miR-205-5p           | 5 |
| <i>circBAZ2B</i> | miR-2052             | 3 |
| <i>circBAZ2B</i> | miR-208-5p           | 4 |
| <i>circBAZ2B</i> | miR-20a-3p           | 3 |
| <i>circBAZ2B</i> | miR-21-3p/3591-3p    | 1 |
| <i>circBAZ2B</i> | miR-21-5p/590-5p     | 2 |
| <i>circBAZ2B</i> | miR-210-5p           | 1 |
| <i>circBAZ2B</i> | miR-211-3p           | 2 |
| <i>circBAZ2B</i> | miR-2110             | 1 |
| <i>circBAZ2B</i> | miR-2113             | 1 |
| <i>circBAZ2B</i> | miR-2114-3p          | 2 |
| <i>circBAZ2B</i> | miR-2115-3p          | 4 |
| <i>circBAZ2B</i> | miR-2116-5p          | 5 |
| <i>circBAZ2B</i> | miR-2117             | 2 |
| <i>circBAZ2B</i> | miR-212-5p           | 1 |

|                  |                                     |   |
|------------------|-------------------------------------|---|
| <i>circBAZ2B</i> | miR-216a-5p                         | 1 |
| <i>circBAZ2B</i> | miR-216b-3p                         | 1 |
| <i>circBAZ2B</i> | miR-216b-5p                         | 1 |
| <i>circBAZ2B</i> | miR-218-1-3p                        | 1 |
| <i>circBAZ2B</i> | miR-218-2-3p                        | 1 |
| <i>circBAZ2B</i> | miR-218-5p                          | 1 |
| <i>circBAZ2B</i> | miR-219a-1-3p                       | 5 |
| <i>circBAZ2B</i> | miR-22-3p                           | 3 |
| <i>circBAZ2B</i> | miR-22-5p                           | 5 |
| <i>circBAZ2B</i> | miR-221-5p/8073                     | 5 |
| <i>circBAZ2B</i> | miR-222-5p                          | 4 |
| <i>circBAZ2B</i> | miR-223-3p                          | 4 |
| <i>circBAZ2B</i> | miR-224-5p                          | 1 |
| <i>circBAZ2B</i> | miR-2277-3p                         | 3 |
| <i>circBAZ2B</i> | miR-2278                            | 2 |
| <i>circBAZ2B</i> | miR-2355-5p                         | 2 |
| <i>circBAZ2B</i> | miR-2392                            | 3 |
| <i>circBAZ2B</i> | miR-24-3p                           | 2 |
| <i>circBAZ2B</i> | miR-24-5p                           | 3 |
| <i>circBAZ2B</i> | miR-2467-5p                         | 4 |
| <i>circBAZ2B</i> | miR-25-3p/32-5p/92-3p/363-3p/367-3p | 1 |
| <i>circBAZ2B</i> | miR-26-3p                           | 2 |
| <i>circBAZ2B</i> | miR-26-5p                           | 2 |
| <i>circBAZ2B</i> | miR-2681-5p                         | 3 |
| <i>circBAZ2B</i> | miR-27a-5p                          | 2 |
| <i>circBAZ2B</i> | miR-27b-5p                          | 2 |
| <i>circBAZ2B</i> | miR-28-3p                           | 4 |
| <i>circBAZ2B</i> | miR-28-5p/708-5p                    | 2 |
| <i>circBAZ2B</i> | miR-2909                            | 1 |
| <i>circBAZ2B</i> | miR-296-3p                          | 2 |
| <i>circBAZ2B</i> | miR-297                             | 8 |
| <i>circBAZ2B</i> | miR-298                             | 2 |
| <i>circBAZ2B</i> | miR-299-3p                          | 3 |
| <i>circBAZ2B</i> | miR-299-5p                          | 3 |
| <i>circBAZ2B</i> | miR-29a-5p                          | 4 |
| <i>circBAZ2B</i> | miR-29b-1-5p                        | 2 |
| <i>circBAZ2B</i> | miR-29b-2-5p                        | 5 |
| <i>circBAZ2B</i> | miR-30-3p                           | 6 |

|                  |                                              |    |
|------------------|----------------------------------------------|----|
| <i>circBAZ2B</i> | miR-30-5p                                    | 2  |
| <i>circBAZ2B</i> | miR-302-3p/372-3p/373-3p/520-3p              | 1  |
| <i>circBAZ2B</i> | miR-302a-5p                                  | 2  |
| <i>circBAZ2B</i> | miR-302c-3p.2/520-3p                         | 1  |
| <i>circBAZ2B</i> | miR-302f                                     | 1  |
| <i>circBAZ2B</i> | miR-3064-3p                                  | 3  |
| <i>circBAZ2B</i> | miR-3065-3p                                  | 2  |
| <i>circBAZ2B</i> | miR-3074-5p                                  | 4  |
| <i>circBAZ2B</i> | miR-30b-3p/1273h-5p/3689-3p/6779-5p/6780a-5p | 1  |
| <i>circBAZ2B</i> | miR-30c-3p/6788-5p                           | 1  |
| <i>circBAZ2B</i> | miR-31-3p                                    | 4  |
| <i>circBAZ2B</i> | miR-3117-5p                                  | 2  |
| <i>circBAZ2B</i> | miR-3119                                     | 6  |
| <i>circBAZ2B</i> | miR-3120-3p                                  | 6  |
| <i>circBAZ2B</i> | miR-3120-5p                                  | 4  |
| <i>circBAZ2B</i> | miR-3121-5p                                  | 2  |
| <i>circBAZ2B</i> | miR-3123                                     | 2  |
| <i>circBAZ2B</i> | miR-3124-3p                                  | 2  |
| <i>circBAZ2B</i> | miR-3125/3916/6859-5p                        | 2  |
| <i>circBAZ2B</i> | miR-3126-3p                                  | 1  |
| <i>circBAZ2B</i> | miR-3126-5p                                  | 3  |
| <i>circBAZ2B</i> | miR-3127-3p/6756-3p                          | 1  |
| <i>circBAZ2B</i> | miR-3128                                     | 2  |
| <i>circBAZ2B</i> | miR-3129-3p/5583-5p                          | 1  |
| <i>circBAZ2B</i> | miR-3130-3p                                  | 1  |
| <i>circBAZ2B</i> | miR-3130-5p/4482-5p                          | 1  |
| <i>circBAZ2B</i> | miR-3133                                     | 10 |
| <i>circBAZ2B</i> | miR-3134                                     | 2  |
| <i>circBAZ2B</i> | miR-3135a                                    | 3  |
| <i>circBAZ2B</i> | miR-3135b                                    | 1  |
| <i>circBAZ2B</i> | miR-3136-3p/7155-3p                          | 1  |
| <i>circBAZ2B</i> | miR-3136-5p/4439                             | 1  |
| <i>circBAZ2B</i> | miR-3138                                     | 2  |
| <i>circBAZ2B</i> | miR-3140-3p                                  | 5  |
| <i>circBAZ2B</i> | miR-3143                                     | 2  |
| <i>circBAZ2B</i> | miR-3144-5p                                  | 4  |
| <i>circBAZ2B</i> | miR-3145-3p                                  | 5  |
| <i>circBAZ2B</i> | miR-3145-5p                                  | 3  |

|                  |                           |    |
|------------------|---------------------------|----|
| <i>circBAZ2B</i> | miR-3146                  | 1  |
| <i>circBAZ2B</i> | miR-3148                  | 5  |
| <i>circBAZ2B</i> | miR-3150a-3p              | 1  |
| <i>circBAZ2B</i> | miR-3150b-3p              | 2  |
| <i>circBAZ2B</i> | miR-3151-3p               | 2  |
| <i>circBAZ2B</i> | miR-3151-5p               | 1  |
| <i>circBAZ2B</i> | miR-3152-3p               | 4  |
| <i>circBAZ2B</i> | miR-3152-5p               | 2  |
| <i>circBAZ2B</i> | miR-3154                  | 7  |
| <i>circBAZ2B</i> | miR-3156-5p               | 5  |
| <i>circBAZ2B</i> | miR-3157-5p               | 2  |
| <i>circBAZ2B</i> | miR-3158-5p               | 1  |
| <i>circBAZ2B</i> | miR-3160-3p               | 1  |
| <i>circBAZ2B</i> | miR-3160-5p               | 2  |
| <i>circBAZ2B</i> | miR-3163                  | 4  |
| <i>circBAZ2B</i> | miR-3164                  | 1  |
| <i>circBAZ2B</i> | miR-3165                  | 3  |
| <i>circBAZ2B</i> | miR-3166                  | 2  |
| <i>circBAZ2B</i> | miR-3168                  | 3  |
| <i>circBAZ2B</i> | miR-3169                  | 5  |
| <i>circBAZ2B</i> | miR-3173-3p/6891-5p       | 5  |
| <i>circBAZ2B</i> | miR-3174                  | 1  |
| <i>circBAZ2B</i> | miR-3177-5p               | 1  |
| <i>circBAZ2B</i> | miR-3179                  | 2  |
| <i>circBAZ2B</i> | miR-3180-5p               | 3  |
| <i>circBAZ2B</i> | miR-3182                  | 2  |
| <i>circBAZ2B</i> | miR-3183/4723-3p/6769b-3p | 4  |
| <i>circBAZ2B</i> | miR-3184-3p               | 2  |
| <i>circBAZ2B</i> | miR-3185                  | 10 |
| <i>circBAZ2B</i> | miR-3187-3p               | 1  |
| <i>circBAZ2B</i> | miR-3188                  | 4  |
| <i>circBAZ2B</i> | miR-3189-3p               | 1  |
| <i>circBAZ2B</i> | miR-3190-3p               | 2  |
| <i>circBAZ2B</i> | miR-3191-3p               | 4  |
| <i>circBAZ2B</i> | miR-3191-5p               | 2  |
| <i>circBAZ2B</i> | miR-3192-5p               | 1  |
| <i>circBAZ2B</i> | miR-3193                  | 1  |
| <i>circBAZ2B</i> | miR-3198/4309             | 1  |

|                  |                    |   |
|------------------|--------------------|---|
| <i>circBAZ2B</i> | miR-3199/8052      | 1 |
| <i>circBAZ2B</i> | miR-320            | 8 |
| <i>circBAZ2B</i> | miR-3200-5p        | 1 |
| <i>circBAZ2B</i> | miR-3202           | 1 |
| <i>circBAZ2B</i> | miR-323a-5p        | 3 |
| <i>circBAZ2B</i> | miR-324-5p         | 1 |
| <i>circBAZ2B</i> | miR-325            | 2 |
| <i>circBAZ2B</i> | miR-326            | 2 |
| <i>circBAZ2B</i> | miR-328-3p         | 1 |
| <i>circBAZ2B</i> | miR-328-5p/6885-5p | 1 |
| <i>circBAZ2B</i> | miR-329-5p         | 2 |
| <i>circBAZ2B</i> | miR-330-3p         | 3 |
| <i>circBAZ2B</i> | miR-330-3p.2       | 6 |
| <i>circBAZ2B</i> | miR-335-3p         | 8 |
| <i>circBAZ2B</i> | miR-335-5p         | 5 |
| <i>circBAZ2B</i> | miR-338-3p         | 2 |
| <i>circBAZ2B</i> | miR-339-5p         | 1 |
| <i>circBAZ2B</i> | miR-33a-3p         | 8 |
| <i>circBAZ2B</i> | miR-340-3p/6827-3p | 2 |
| <i>circBAZ2B</i> | miR-340-5p         | 4 |
| <i>circBAZ2B</i> | miR-342-3p         | 2 |
| <i>circBAZ2B</i> | miR-345-5p         | 1 |
| <i>circBAZ2B</i> | miR-34a-3p         | 3 |
| <i>circBAZ2B</i> | miR-34b-3p         | 1 |
| <i>circBAZ2B</i> | miR-34b-5p/449c-5p | 2 |
| <i>circBAZ2B</i> | miR-34c-3p         | 1 |
| <i>circBAZ2B</i> | miR-3529-3p        | 2 |
| <i>circBAZ2B</i> | miR-3591-5p        | 3 |
| <i>circBAZ2B</i> | miR-3605-5p        | 1 |
| <i>circBAZ2B</i> | miR-3607-5p        | 1 |
| <i>circBAZ2B</i> | miR-361-3p         | 1 |
| <i>circBAZ2B</i> | miR-361-5p         | 2 |
| <i>circBAZ2B</i> | miR-3611           | 7 |
| <i>circBAZ2B</i> | miR-3613-3p        | 2 |
| <i>circBAZ2B</i> | miR-3614-3p        | 1 |
| <i>circBAZ2B</i> | miR-3617-3p        | 3 |
| <i>circBAZ2B</i> | miR-3620-3p        | 2 |
| <i>circBAZ2B</i> | miR-3622b-5p       | 3 |

|                  |                           |   |
|------------------|---------------------------|---|
| <i>circBAZ2B</i> | miR-363-5p/6745           | 1 |
| <i>circBAZ2B</i> | miR-3646                  | 1 |
| <i>circBAZ2B</i> | miR-3650                  | 5 |
| <i>circBAZ2B</i> | miR-3652/4430             | 2 |
| <i>circBAZ2B</i> | miR-3653-3p               | 1 |
| <i>circBAZ2B</i> | miR-3653-5p               | 2 |
| <i>circBAZ2B</i> | miR-3654                  | 2 |
| <i>circBAZ2B</i> | miR-3657                  | 6 |
| <i>circBAZ2B</i> | miR-3659                  | 9 |
| <i>circBAZ2B</i> | miR-365a-5p/365b-5p       | 1 |
| <i>circBAZ2B</i> | miR-3662                  | 1 |
| <i>circBAZ2B</i> | miR-3663-5p               | 3 |
| <i>circBAZ2B</i> | miR-3667-5p               | 2 |
| <i>circBAZ2B</i> | miR-3668                  | 2 |
| <i>circBAZ2B</i> | miR-367-5p                | 2 |
| <i>circBAZ2B</i> | miR-3671                  | 1 |
| <i>circBAZ2B</i> | miR-3672/6864-3p          | 1 |
| <i>circBAZ2B</i> | miR-3674                  | 1 |
| <i>circBAZ2B</i> | miR-3679-3p               | 1 |
| <i>circBAZ2B</i> | miR-3680-3p               | 3 |
| <i>circBAZ2B</i> | miR-3681-5p               | 1 |
| <i>circBAZ2B</i> | miR-3682-3p               | 3 |
| <i>circBAZ2B</i> | miR-3682-5p               | 1 |
| <i>circBAZ2B</i> | miR-3683                  | 2 |
| <i>circBAZ2B</i> | miR-3685                  | 3 |
| <i>circBAZ2B</i> | miR-3686                  | 1 |
| <i>circBAZ2B</i> | miR-3688-3p               | 7 |
| <i>circBAZ2B</i> | miR-3688-5p               | 1 |
| <i>circBAZ2B</i> | miR-3691-3p               | 2 |
| <i>circBAZ2B</i> | miR-3691-5p               | 1 |
| <i>circBAZ2B</i> | miR-3692-5p               | 3 |
| <i>circBAZ2B</i> | miR-370-3p                | 1 |
| <i>circBAZ2B</i> | miR-371-5p                | 1 |
| <i>circBAZ2B</i> | miR-3714                  | 4 |
| <i>circBAZ2B</i> | miR-371b-5p/373-5p/616-5p | 1 |
| <i>circBAZ2B</i> | miR-372-5p                | 1 |
| <i>circBAZ2B</i> | miR-374-5p/655-3p         | 1 |
| <i>circBAZ2B</i> | miR-374a-3p               | 5 |

|                  |                     |   |
|------------------|---------------------|---|
| <i>circBAZ2B</i> | miR-374b-3p         | 1 |
| <i>circBAZ2B</i> | miR-374c-3p         | 1 |
| <i>circBAZ2B</i> | miR-375             | 4 |
| <i>circBAZ2B</i> | miR-376a-2-5p       | 1 |
| <i>circBAZ2B</i> | miR-376a-5p         | 1 |
| <i>circBAZ2B</i> | miR-376b-5p/376c-5p | 1 |
| <i>circBAZ2B</i> | miR-377-3p          | 4 |
| <i>circBAZ2B</i> | miR-377-5p/6086     | 2 |
| <i>circBAZ2B</i> | miR-378a-5p         | 3 |
| <i>circBAZ2B</i> | miR-378g            | 1 |
| <i>circBAZ2B</i> | miR-378j/6839-5p    | 2 |
| <i>circBAZ2B</i> | miR-379-5p          | 4 |
| <i>circBAZ2B</i> | miR-380-3p          | 2 |
| <i>circBAZ2B</i> | miR-380-5p/563      | 1 |
| <i>circBAZ2B</i> | miR-381-3p          | 1 |
| <i>circBAZ2B</i> | miR-382-3p          | 4 |
| <i>circBAZ2B</i> | miR-382-5p          | 1 |
| <i>circBAZ2B</i> | miR-383-3p          | 2 |
| <i>circBAZ2B</i> | miR-383-5p.2        | 3 |
| <i>circBAZ2B</i> | miR-384             | 3 |
| <i>circBAZ2B</i> | miR-3908            | 4 |
| <i>circBAZ2B</i> | miR-3909            | 1 |
| <i>circBAZ2B</i> | miR-3910            | 4 |
| <i>circBAZ2B</i> | miR-3911            | 2 |
| <i>circBAZ2B</i> | miR-3912-3p         | 1 |
| <i>circBAZ2B</i> | miR-3912-5p         | 3 |
| <i>circBAZ2B</i> | miR-3914            | 2 |
| <i>circBAZ2B</i> | miR-3915            | 2 |
| <i>circBAZ2B</i> | miR-3920            | 2 |
| <i>circBAZ2B</i> | miR-3923            | 2 |
| <i>circBAZ2B</i> | miR-3925-3p         | 4 |
| <i>circBAZ2B</i> | miR-3925-5p         | 2 |
| <i>circBAZ2B</i> | miR-3926            | 1 |
| <i>circBAZ2B</i> | miR-3927-3p/6831-5p | 3 |
| <i>circBAZ2B</i> | miR-3928-3p         | 1 |
| <i>circBAZ2B</i> | miR-3928-5p/6806-3p | 3 |
| <i>circBAZ2B</i> | miR-3929/4419b/4478 | 3 |
| <i>circBAZ2B</i> | miR-3934-3p         | 2 |



|                  |                       |   |
|------------------|-----------------------|---|
| <i>circBAZ2B</i> | miR-3934-5p           | 2 |
| <i>circBAZ2B</i> | miR-3935              | 1 |
| <i>circBAZ2B</i> | miR-3936              | 3 |
| <i>circBAZ2B</i> | miR-3942-3p           | 7 |
| <i>circBAZ2B</i> | miR-3942-5p           | 4 |
| <i>circBAZ2B</i> | miR-3943              | 1 |
| <i>circBAZ2B</i> | miR-3944-5p           | 2 |
| <i>circBAZ2B</i> | miR-3973              | 1 |
| <i>circBAZ2B</i> | miR-3975              | 4 |
| <i>circBAZ2B</i> | miR-3977              | 4 |
| <i>circBAZ2B</i> | miR-3978              | 6 |
| <i>circBAZ2B</i> | miR-409-3p            | 4 |
| <i>circBAZ2B</i> | miR-409-5p            | 1 |
| <i>circBAZ2B</i> | miR-410-3p            | 2 |
| <i>circBAZ2B</i> | miR-411-3p            | 8 |
| <i>circBAZ2B</i> | miR-411-5p.1          | 4 |
| <i>circBAZ2B</i> | miR-412-3p/6754-3p    | 2 |
| <i>circBAZ2B</i> | miR-421               | 4 |
| <i>circBAZ2B</i> | miR-424-3p            | 2 |
| <i>circBAZ2B</i> | miR-425-5p            | 1 |
| <i>circBAZ2B</i> | miR-4252              | 1 |
| <i>circBAZ2B</i> | miR-4255              | 6 |
| <i>circBAZ2B</i> | miR-4257              | 3 |
| <i>circBAZ2B</i> | miR-4263              | 3 |
| <i>circBAZ2B</i> | miR-4264              | 1 |
| <i>circBAZ2B</i> | miR-4265/4296/4322    | 2 |
| <i>circBAZ2B</i> | miR-4267              | 2 |
| <i>circBAZ2B</i> | miR-4268              | 5 |
| <i>circBAZ2B</i> | miR-4269/6715b-5p     | 1 |
| <i>circBAZ2B</i> | miR-4270/4441/6754-5p | 1 |
| <i>circBAZ2B</i> | miR-4272              | 2 |
| <i>circBAZ2B</i> | miR-4273/7156-5p      | 5 |
| <i>circBAZ2B</i> | miR-4274              | 4 |
| <i>circBAZ2B</i> | miR-4276              | 1 |
| <i>circBAZ2B</i> | miR-4277              | 2 |
| <i>circBAZ2B</i> | miR-4278              | 3 |
| <i>circBAZ2B</i> | miR-4280              | 4 |
| <i>circBAZ2B</i> | miR-4283              | 2 |

|                  |                                    |    |
|------------------|------------------------------------|----|
| <i>circBAZ2B</i> | miR-4284                           | 2  |
| <i>circBAZ2B</i> | miR-4291                           | 4  |
| <i>circBAZ2B</i> | miR-4293                           | 3  |
| <i>circBAZ2B</i> | miR-4299                           | 2  |
| <i>circBAZ2B</i> | miR-4301                           | 4  |
| <i>circBAZ2B</i> | miR-4305                           | 2  |
| <i>circBAZ2B</i> | miR-4307                           | 6  |
| <i>circBAZ2B</i> | miR-431-5p                         | 2  |
| <i>circBAZ2B</i> | miR-4310/7157-5p                   | 6  |
| <i>circBAZ2B</i> | miR-4311                           | 4  |
| <i>circBAZ2B</i> | miR-4314                           | 2  |
| <i>circBAZ2B</i> | miR-4316                           | 4  |
| <i>circBAZ2B</i> | miR-4317                           | 1  |
| <i>circBAZ2B</i> | miR-4318                           | 3  |
| <i>circBAZ2B</i> | miR-432-3p                         | 3  |
| <i>circBAZ2B</i> | miR-432-5p                         | 4  |
| <i>circBAZ2B</i> | miR-4320                           | 1  |
| <i>circBAZ2B</i> | miR-4323                           | 1  |
| <i>circBAZ2B</i> | miR-4324                           | 3  |
| <i>circBAZ2B</i> | miR-4325                           | 2  |
| <i>circBAZ2B</i> | miR-4328                           | 3  |
| <i>circBAZ2B</i> | miR-433-5p                         | 1  |
| <i>circBAZ2B</i> | miR-4330                           | 3  |
| <i>circBAZ2B</i> | miR-4417                           | 1  |
| <i>circBAZ2B</i> | miR-4419a/4510/6127/6129/6130/6133 | 3  |
| <i>circBAZ2B</i> | miR-4422                           | 6  |
| <i>circBAZ2B</i> | miR-4423-5p                        | 2  |
| <i>circBAZ2B</i> | miR-4426/4647/4662b                | 3  |
| <i>circBAZ2B</i> | miR-4427                           | 4  |
| <i>circBAZ2B</i> | miR-4428                           | 5  |
| <i>circBAZ2B</i> | miR-4432                           | 4  |
| <i>circBAZ2B</i> | miR-4433b-5p                       | 1  |
| <i>circBAZ2B</i> | miR-4434/4516/5703                 | 10 |
| <i>circBAZ2B</i> | miR-4435                           | 1  |
| <i>circBAZ2B</i> | miR-4438                           | 2  |
| <i>circBAZ2B</i> | miR-4447/4472                      | 1  |
| <i>circBAZ2B</i> | miR-4448                           | 5  |
| <i>circBAZ2B</i> | miR-4450                           | 2  |

|                  |                  |   |
|------------------|------------------|---|
| <i>circBAZ2B</i> | miR-4451         | 4 |
| <i>circBAZ2B</i> | miR-4456         | 2 |
| <i>circBAZ2B</i> | miR-4460         | 1 |
| <i>circBAZ2B</i> | miR-4463         | 3 |
| <i>circBAZ2B</i> | miR-4464/4748    | 2 |
| <i>circBAZ2B</i> | miR-4468         | 2 |
| <i>circBAZ2B</i> | miR-4470         | 2 |
| <i>circBAZ2B</i> | miR-4474-5p      | 2 |
| <i>circBAZ2B</i> | miR-4475         | 3 |
| <i>circBAZ2B</i> | miR-4476/6876-5p | 5 |
| <i>circBAZ2B</i> | miR-4480         | 1 |
| <i>circBAZ2B</i> | miR-4481/4745-5p | 1 |
| <i>circBAZ2B</i> | miR-4484         | 4 |
| <i>circBAZ2B</i> | miR-4486         | 1 |
| <i>circBAZ2B</i> | miR-4487         | 1 |
| <i>circBAZ2B</i> | miR-4489         | 2 |
| <i>circBAZ2B</i> | miR-4491/4657    | 3 |
| <i>circBAZ2B</i> | miR-4493         | 3 |
| <i>circBAZ2B</i> | miR-4494         | 3 |
| <i>circBAZ2B</i> | miR-4496         | 3 |
| <i>circBAZ2B</i> | miR-4499         | 3 |
| <i>circBAZ2B</i> | miR-4501         | 5 |
| <i>circBAZ2B</i> | miR-4503         | 1 |
| <i>circBAZ2B</i> | miR-4504         | 2 |
| <i>circBAZ2B</i> | miR-4505/5787    | 2 |
| <i>circBAZ2B</i> | miR-4506         | 2 |
| <i>circBAZ2B</i> | miR-4509         | 3 |
| <i>circBAZ2B</i> | miR-450b-5p      | 3 |
| <i>circBAZ2B</i> | miR-4511         | 4 |
| <i>circBAZ2B</i> | miR-4513/6855-3p | 2 |
| <i>circBAZ2B</i> | miR-4514/4692    | 1 |
| <i>circBAZ2B</i> | miR-4519         | 4 |
| <i>circBAZ2B</i> | miR-452-3p       | 1 |
| <i>circBAZ2B</i> | miR-4520-3p      | 2 |
| <i>circBAZ2B</i> | miR-4522         | 1 |
| <i>circBAZ2B</i> | miR-4524-5p      | 1 |
| <i>circBAZ2B</i> | miR-4524a-3p     | 5 |
| <i>circBAZ2B</i> | miR-4524b-3p     | 1 |

|                  |                          |    |
|------------------|--------------------------|----|
| <i>circBAZ2B</i> | miR-4530                 | 2  |
| <i>circBAZ2B</i> | miR-4531                 | 10 |
| <i>circBAZ2B</i> | miR-4533                 | 1  |
| <i>circBAZ2B</i> | miR-4534/8082            | 2  |
| <i>circBAZ2B</i> | miR-4536-5p              | 1  |
| <i>circBAZ2B</i> | miR-4540                 | 1  |
| <i>circBAZ2B</i> | miR-455-3p.1             | 3  |
| <i>circBAZ2B</i> | miR-455-3p.2             | 3  |
| <i>circBAZ2B</i> | miR-455-5p               | 1  |
| <i>circBAZ2B</i> | miR-4639-5p              | 4  |
| <i>circBAZ2B</i> | miR-4640-3p              | 3  |
| <i>circBAZ2B</i> | miR-4642                 | 3  |
| <i>circBAZ2B</i> | miR-4643                 | 2  |
| <i>circBAZ2B</i> | miR-4645-3p              | 3  |
| <i>circBAZ2B</i> | miR-4645-5p/4673         | 2  |
| <i>circBAZ2B</i> | miR-4650-3p              | 4  |
| <i>circBAZ2B</i> | miR-4652-5p              | 4  |
| <i>circBAZ2B</i> | miR-4658/6790-5p         | 9  |
| <i>circBAZ2B</i> | miR-4659a-3p/4659b-3p    | 4  |
| <i>circBAZ2B</i> | miR-4660                 | 1  |
| <i>circBAZ2B</i> | miR-4661-3p              | 1  |
| <i>circBAZ2B</i> | miR-4662a-3p             | 2  |
| <i>circBAZ2B</i> | miR-4663                 | 1  |
| <i>circBAZ2B</i> | miR-4666a-3p             | 1  |
| <i>circBAZ2B</i> | miR-4666a-5p             | 2  |
| <i>circBAZ2B</i> | miR-4667-5p/4700-5p/8089 | 1  |
| <i>circBAZ2B</i> | miR-4669                 | 6  |
| <i>circBAZ2B</i> | miR-4670-3p              | 2  |
| <i>circBAZ2B</i> | miR-4674                 | 2  |
| <i>circBAZ2B</i> | miR-4677-3p              | 3  |
| <i>circBAZ2B</i> | miR-4677-5p              | 5  |
| <i>circBAZ2B</i> | miR-4678                 | 1  |
| <i>circBAZ2B</i> | miR-4679                 | 3  |
| <i>circBAZ2B</i> | miR-4680-3p              | 4  |
| <i>circBAZ2B</i> | miR-4682                 | 7  |
| <i>circBAZ2B</i> | miR-4684-3p              | 3  |
| <i>circBAZ2B</i> | miR-4685-5p/6837-5p      | 1  |
| <i>circBAZ2B</i> | miR-4688/6743-5p         | 2  |

|                  |                                  |    |
|------------------|----------------------------------|----|
| <i>circBAZ2B</i> | miR-4689/6858-5p                 | 2  |
| <i>circBAZ2B</i> | miR-4691-3p                      | 1  |
| <i>circBAZ2B</i> | miR-4693-3p                      | 4  |
| <i>circBAZ2B</i> | miR-4693-5p                      | 1  |
| <i>circBAZ2B</i> | miR-4694-3p                      | 7  |
| <i>circBAZ2B</i> | miR-4696                         | 2  |
| <i>circBAZ2B</i> | miR-4697-3p                      | 4  |
| <i>circBAZ2B</i> | miR-4699-3p                      | 8  |
| <i>circBAZ2B</i> | miR-4699-5p                      | 8  |
| <i>circBAZ2B</i> | miR-4700-3p                      | 1  |
| <i>circBAZ2B</i> | miR-4704-3p                      | 1  |
| <i>circBAZ2B</i> | miR-4708-3p                      | 2  |
| <i>circBAZ2B</i> | miR-4709-3p                      | 11 |
| <i>circBAZ2B</i> | miR-4709-5p                      | 5  |
| <i>circBAZ2B</i> | miR-4711-5p                      | 5  |
| <i>circBAZ2B</i> | miR-4712-3p                      | 1  |
| <i>circBAZ2B</i> | miR-4713-5p                      | 1  |
| <i>circBAZ2B</i> | miR-4714-3p                      | 1  |
| <i>circBAZ2B</i> | miR-4715-3p                      | 1  |
| <i>circBAZ2B</i> | miR-4717-3p                      | 4  |
| <i>circBAZ2B</i> | miR-4717-5p                      | 1  |
| <i>circBAZ2B</i> | miR-4718                         | 5  |
| <i>circBAZ2B</i> | miR-4719                         | 5  |
| <i>circBAZ2B</i> | miR-4720-3p                      | 1  |
| <i>circBAZ2B</i> | miR-4720-5p/4799-3p/5588-5p      | 2  |
| <i>circBAZ2B</i> | miR-4722-3p/6727-3p              | 1  |
| <i>circBAZ2B</i> | miR-4723-5p/5698/6870-5p/7111-5p | 1  |
| <i>circBAZ2B</i> | miR-4724-3p                      | 1  |
| <i>circBAZ2B</i> | miR-4724-5p                      | 5  |
| <i>circBAZ2B</i> | miR-4727-3p                      | 1  |
| <i>circBAZ2B</i> | miR-4727-5p                      | 1  |
| <i>circBAZ2B</i> | miR-4728-3p                      | 3  |
| <i>circBAZ2B</i> | miR-4729                         | 3  |
| <i>circBAZ2B</i> | miR-4731-3p/4801                 | 3  |
| <i>circBAZ2B</i> | miR-4733-3p                      | 2  |
| <i>circBAZ2B</i> | miR-4735-5p                      | 2  |
| <i>circBAZ2B</i> | miR-4738-3p                      | 2  |
| <i>circBAZ2B</i> | miR-4739                         | 3  |

|                  |                     |    |
|------------------|---------------------|----|
| <i>circBAZ2B</i> | miR-4742-3p         | 5  |
| <i>circBAZ2B</i> | miR-4742-5p         | 1  |
| <i>circBAZ2B</i> | miR-4744            | 3  |
| <i>circBAZ2B</i> | miR-4747-5p/5196-5p | 1  |
| <i>circBAZ2B</i> | miR-4749-3p         | 1  |
| <i>circBAZ2B</i> | miR-4751            | 3  |
| <i>circBAZ2B</i> | miR-4752            | 6  |
| <i>circBAZ2B</i> | miR-4753-5p         | 1  |
| <i>circBAZ2B</i> | miR-4757-3p         | 2  |
| <i>circBAZ2B</i> | miR-4759            | 5  |
| <i>circBAZ2B</i> | miR-4760-3p         | 4  |
| <i>circBAZ2B</i> | miR-4760-5p/8061    | 2  |
| <i>circBAZ2B</i> | miR-4762-5p         | 4  |
| <i>circBAZ2B</i> | miR-4763-5p         | 3  |
| <i>circBAZ2B</i> | miR-4764-3p         | 2  |
| <i>circBAZ2B</i> | miR-4764-5p         | 2  |
| <i>circBAZ2B</i> | miR-4765            | 3  |
| <i>circBAZ2B</i> | miR-4766-3p         | 3  |
| <i>circBAZ2B</i> | miR-4766-5p         | 4  |
| <i>circBAZ2B</i> | miR-4768-5p/6833-3p | 2  |
| <i>circBAZ2B</i> | miR-4771            | 2  |
| <i>circBAZ2B</i> | miR-4773            | 10 |
| <i>circBAZ2B</i> | miR-4774-3p         | 2  |
| <i>circBAZ2B</i> | miR-4776-3p         | 3  |
| <i>circBAZ2B</i> | miR-4777-5p         | 4  |
| <i>circBAZ2B</i> | miR-4778-3p         | 1  |
| <i>circBAZ2B</i> | miR-4780            | 1  |
| <i>circBAZ2B</i> | miR-4781-3p         | 4  |
| <i>circBAZ2B</i> | miR-4782-5p/5706    | 2  |
| <i>circBAZ2B</i> | miR-4786-3p         | 3  |
| <i>circBAZ2B</i> | miR-4789-3p         | 2  |
| <i>circBAZ2B</i> | miR-4793-3p         | 1  |
| <i>circBAZ2B</i> | miR-4795-3p         | 1  |
| <i>circBAZ2B</i> | miR-4797-3p         | 1  |
| <i>circBAZ2B</i> | miR-4797-5p         | 1  |
| <i>circBAZ2B</i> | miR-4799-5p         | 2  |
| <i>circBAZ2B</i> | miR-4800-3p         | 1  |
| <i>circBAZ2B</i> | miR-4800-5p         | 2  |

|                  |                     |   |
|------------------|---------------------|---|
| <i>circBAZ2B</i> | miR-4802-5p         | 3 |
| <i>circBAZ2B</i> | miR-4803            | 4 |
| <i>circBAZ2B</i> | miR-4804-3p         | 1 |
| <i>circBAZ2B</i> | miR-483-3p.1        | 1 |
| <i>circBAZ2B</i> | miR-483-3p.2        | 3 |
| <i>circBAZ2B</i> | miR-484/3155        | 5 |
| <i>circBAZ2B</i> | miR-485-5p          | 4 |
| <i>circBAZ2B</i> | miR-486-5p          | 2 |
| <i>circBAZ2B</i> | miR-487a-5p/487b-5p | 1 |
| <i>circBAZ2B</i> | miR-488-3p          | 7 |
| <i>circBAZ2B</i> | miR-488-5p          | 1 |
| <i>circBAZ2B</i> | miR-490-3p          | 4 |
| <i>circBAZ2B</i> | miR-490-5p          | 2 |
| <i>circBAZ2B</i> | miR-491-5p          | 1 |
| <i>circBAZ2B</i> | miR-492             | 1 |
| <i>circBAZ2B</i> | miR-493-3p          | 3 |
| <i>circBAZ2B</i> | miR-493-5p          | 1 |
| <i>circBAZ2B</i> | miR-494-3p          | 2 |
| <i>circBAZ2B</i> | miR-495-3p          | 2 |
| <i>circBAZ2B</i> | miR-495-5p          | 1 |
| <i>circBAZ2B</i> | miR-496.1           | 1 |
| <i>circBAZ2B</i> | miR-496.2           | 2 |
| <i>circBAZ2B</i> | miR-497-3p          | 5 |
| <i>circBAZ2B</i> | miR-498             | 5 |
| <i>circBAZ2B</i> | miR-4999-5p         | 5 |
| <i>circBAZ2B</i> | miR-499a-3p/499b-3p | 1 |
| <i>circBAZ2B</i> | miR-499b-5p         | 3 |
| <i>circBAZ2B</i> | miR-5000-3p         | 3 |
| <i>circBAZ2B</i> | miR-5001-3p         | 1 |
| <i>circBAZ2B</i> | miR-5002-5p         | 3 |
| <i>circBAZ2B</i> | miR-5004-3p         | 4 |
| <i>circBAZ2B</i> | miR-5004-5p         | 3 |
| <i>circBAZ2B</i> | miR-5006-5p         | 2 |
| <i>circBAZ2B</i> | miR-5007-3p         | 2 |
| <i>circBAZ2B</i> | miR-5007-5p         | 1 |
| <i>circBAZ2B</i> | miR-5009-3p         | 3 |
| <i>circBAZ2B</i> | miR-500a-3p         | 1 |
| <i>circBAZ2B</i> | miR-500a-5p         | 3 |

|                  |                             |    |
|------------------|-----------------------------|----|
| <i>circBAZ2B</i> | miR-500b-3p                 | 1  |
| <i>circBAZ2B</i> | miR-501-3p/502-3p           | 2  |
| <i>circBAZ2B</i> | miR-5010-3p                 | 1  |
| <i>circBAZ2B</i> | miR-5010-5p                 | 1  |
| <i>circBAZ2B</i> | miR-503-5p                  | 3  |
| <i>circBAZ2B</i> | miR-504-3p                  | 1  |
| <i>circBAZ2B</i> | miR-504-5p.1                | 1  |
| <i>circBAZ2B</i> | miR-505-3p.1                | 2  |
| <i>circBAZ2B</i> | miR-505-3p.2                | 4  |
| <i>circBAZ2B</i> | miR-506-5p                  | 2  |
| <i>circBAZ2B</i> | miR-507/557                 | 3  |
| <i>circBAZ2B</i> | miR-508-5p                  | 3  |
| <i>circBAZ2B</i> | miR-5087                    | 2  |
| <i>circBAZ2B</i> | miR-5093                    | 4  |
| <i>circBAZ2B</i> | miR-5096                    | 2  |
| <i>circBAZ2B</i> | miR-510-3p                  | 4  |
| <i>circBAZ2B</i> | miR-510-5p                  | 1  |
| <i>circBAZ2B</i> | miR-5100                    | 1  |
| <i>circBAZ2B</i> | miR-511-3p                  | 4  |
| <i>circBAZ2B</i> | miR-511-5p                  | 5  |
| <i>circBAZ2B</i> | miR-512-3p                  | 1  |
| <i>circBAZ2B</i> | miR-513a-3p/513c-3p/3606-3p | 2  |
| <i>circBAZ2B</i> | miR-513b-5p                 | 2  |
| <i>circBAZ2B</i> | miR-515-5p/519e-5p          | 3  |
| <i>circBAZ2B</i> | miR-516b-5p                 | 2  |
| <i>circBAZ2B</i> | miR-5186                    | 3  |
| <i>circBAZ2B</i> | miR-5187-3p                 | 4  |
| <i>circBAZ2B</i> | miR-5187-5p                 | 1  |
| <i>circBAZ2B</i> | miR-518a-5p/527             | 4  |
| <i>circBAZ2B</i> | miR-518c-5p                 | 2  |
| <i>circBAZ2B</i> | miR-518d-5p/519-5p          | 4  |
| <i>circBAZ2B</i> | miR-519-3p                  | 1  |
| <i>circBAZ2B</i> | miR-5190                    | 4  |
| <i>circBAZ2B</i> | miR-5192                    | 5  |
| <i>circBAZ2B</i> | miR-5193                    | 1  |
| <i>circBAZ2B</i> | miR-5197-3p                 | 11 |
| <i>circBAZ2B</i> | miR-5197-5p                 | 1  |
| <i>circBAZ2B</i> | miR-520f-5p                 | 1  |



|                  |                                                                  |    |
|------------------|------------------------------------------------------------------|----|
| <i>circBAZ2B</i> | miR-520g-3p                                                      | 1  |
| <i>circBAZ2B</i> | miR-520g-5p                                                      | 1  |
| <i>circBAZ2B</i> | miR-522-3p                                                       | 7  |
| <i>circBAZ2B</i> | miR-524-3p/525-3p                                                | 2  |
| <i>circBAZ2B</i> | miR-524-5p                                                       | 1  |
| <i>circBAZ2B</i> | miR-525-5p                                                       | 4  |
| <i>circBAZ2B</i> | miR-526b-5p                                                      | 1  |
| <i>circBAZ2B</i> | miR-532-5p                                                       | 3  |
| <i>circBAZ2B</i> | miR-539-3p                                                       | 1  |
| <i>circBAZ2B</i> | miR-539-5p                                                       | 3  |
| <i>circBAZ2B</i> | miR-541-5p                                                       | 3  |
| <i>circBAZ2B</i> | miR-542-3p                                                       | 2  |
| <i>circBAZ2B</i> | miR-542-5p                                                       | 1  |
| <i>circBAZ2B</i> | miR-543                                                          | 10 |
| <i>circBAZ2B</i> | miR-544a                                                         | 2  |
| <i>circBAZ2B</i> | miR-544b                                                         | 3  |
| <i>circBAZ2B</i> | miR-545-3p                                                       | 4  |
| <i>circBAZ2B</i> | miR-545-5p                                                       | 2  |
| <i>circBAZ2B</i> | miR-548ac/548bb-3p/548d-3p/548h-3p/548z                          | 4  |
| <i>circBAZ2B</i> | miR-548ad-3p                                                     | 2  |
| <i>circBAZ2B</i> | miR-548ah-5p/3609                                                | 3  |
| <i>circBAZ2B</i> | miR-548ai/548ag/548ba/570-5p                                     | 2  |
| <i>circBAZ2B</i> | miR-548aj-5p/548f-5p/548g-5p/548x-5p                             | 3  |
| <i>circBAZ2B</i> | miR-548an                                                        | 4  |
| <i>circBAZ2B</i> | miR-548ao-3p                                                     | 2  |
| <i>circBAZ2B</i> | miR-548ao-5p/548ax                                               | 8  |
| <i>circBAZ2B</i> | miR-548ap-3p/548aa/548t-3p                                       | 3  |
| <i>circBAZ2B</i> | miR-548aq-3p/548am-3p/548aj-3p/548ah-3p/548ae-3p/548j-3p/548x-3p | 6  |
| <i>circBAZ2B</i> | miR-548as-3p                                                     | 3  |
| <i>circBAZ2B</i> | miR-548at-5p                                                     | 4  |
| <i>circBAZ2B</i> | miR-548av-3p                                                     | 5  |
| <i>circBAZ2B</i> | miR-548av-5p/548k/8054                                           | 4  |
| <i>circBAZ2B</i> | miR-548aw                                                        | 4  |
| <i>circBAZ2B</i> | miR-548ay-3p/548at-3p                                            | 3  |
| <i>circBAZ2B</i> | miR-548ay-5p/548au-5p/548as-5p/548ar-5p/548aq-5p/548ap-5p/548am- | 4  |
| <i>circBAZ2B</i> | miR-548az-3p/548ar-3p/548a-3p/548e-3p/548f-3p                    | 4  |
| <i>circBAZ2B</i> | miR-548az-5p/548t-5p                                             | 5  |
| <i>circBAZ2B</i> | miR-548b-3p                                                      | 4  |

|                  |                  |   |
|------------------|------------------|---|
| <i>circBAZ2B</i> | miR-548c-3p      | 1 |
| <i>circBAZ2B</i> | miR-548e-5p      | 2 |
| <i>circBAZ2B</i> | miR-548g-3p      | 2 |
| <i>circBAZ2B</i> | miR-548l         | 4 |
| <i>circBAZ2B</i> | miR-548m         | 1 |
| <i>circBAZ2B</i> | miR-548n         | 5 |
| <i>circBAZ2B</i> | miR-548p         | 1 |
| <i>circBAZ2B</i> | miR-548q         | 2 |
| <i>circBAZ2B</i> | miR-548s         | 1 |
| <i>circBAZ2B</i> | miR-548u/7161-5p | 1 |
| <i>circBAZ2B</i> | miR-549a         | 4 |
| <i>circBAZ2B</i> | miR-550b-3p      | 3 |
| <i>circBAZ2B</i> | miR-551b-5p      | 3 |
| <i>circBAZ2B</i> | miR-552-3p       | 4 |
| <i>circBAZ2B</i> | miR-554          | 2 |
| <i>circBAZ2B</i> | miR-556-3p       | 4 |
| <i>circBAZ2B</i> | miR-5571-3p      | 1 |
| <i>circBAZ2B</i> | miR-5579-5p      | 1 |
| <i>circBAZ2B</i> | miR-558          | 1 |
| <i>circBAZ2B</i> | miR-5580-5p      | 2 |
| <i>circBAZ2B</i> | miR-5582-3p      | 4 |
| <i>circBAZ2B</i> | miR-5584-3p      | 3 |
| <i>circBAZ2B</i> | miR-5584-5p      | 1 |
| <i>circBAZ2B</i> | miR-5585-3p      | 2 |
| <i>circBAZ2B</i> | miR-5585-5p      | 8 |
| <i>circBAZ2B</i> | miR-5586-3p      | 4 |
| <i>circBAZ2B</i> | miR-5586-5p      | 3 |
| <i>circBAZ2B</i> | miR-5587-5p      | 4 |
| <i>circBAZ2B</i> | miR-5589-3p      | 2 |
| <i>circBAZ2B</i> | miR-561-3p       | 4 |
| <i>circBAZ2B</i> | miR-562          | 4 |
| <i>circBAZ2B</i> | miR-567          | 8 |
| <i>circBAZ2B</i> | miR-5680         | 4 |
| <i>circBAZ2B</i> | miR-5681a        | 6 |
| <i>circBAZ2B</i> | miR-5683         | 5 |
| <i>circBAZ2B</i> | miR-5684         | 1 |
| <i>circBAZ2B</i> | miR-5687         | 4 |
| <i>circBAZ2B</i> | miR-5690         | 1 |

|                  |                  |   |
|------------------|------------------|---|
| <i>circBAZ2B</i> | miR-5692a        | 3 |
| <i>circBAZ2B</i> | miR-5693         | 1 |
| <i>circBAZ2B</i> | miR-5694         | 3 |
| <i>circBAZ2B</i> | miR-5696         | 2 |
| <i>circBAZ2B</i> | miR-5697         | 3 |
| <i>circBAZ2B</i> | miR-570-3p       | 3 |
| <i>circBAZ2B</i> | miR-5700         | 1 |
| <i>circBAZ2B</i> | miR-5701         | 2 |
| <i>circBAZ2B</i> | miR-5702         | 2 |
| <i>circBAZ2B</i> | miR-571          | 5 |
| <i>circBAZ2B</i> | miR-573/3616-5p  | 4 |
| <i>circBAZ2B</i> | miR-574-5p       | 9 |
| <i>circBAZ2B</i> | miR-576-5p       | 3 |
| <i>circBAZ2B</i> | miR-577          | 5 |
| <i>circBAZ2B</i> | miR-578          | 1 |
| <i>circBAZ2B</i> | miR-579-3p       | 2 |
| <i>circBAZ2B</i> | miR-580-3p       | 1 |
| <i>circBAZ2B</i> | miR-581          | 3 |
| <i>circBAZ2B</i> | miR-582-5p       | 2 |
| <i>circBAZ2B</i> | miR-583          | 4 |
| <i>circBAZ2B</i> | miR-584-3p       | 4 |
| <i>circBAZ2B</i> | miR-587          | 1 |
| <i>circBAZ2B</i> | miR-588          | 1 |
| <i>circBAZ2B</i> | miR-589-3p       | 1 |
| <i>circBAZ2B</i> | miR-589-5p       | 6 |
| <i>circBAZ2B</i> | miR-590-3p       | 2 |
| <i>circBAZ2B</i> | miR-591          | 1 |
| <i>circBAZ2B</i> | miR-595          | 3 |
| <i>circBAZ2B</i> | miR-596          | 3 |
| <i>circBAZ2B</i> | miR-597-5p       | 1 |
| <i>circBAZ2B</i> | miR-600          | 1 |
| <i>circBAZ2B</i> | miR-601          | 2 |
| <i>circBAZ2B</i> | miR-605-3p       | 3 |
| <i>circBAZ2B</i> | miR-605-5p       | 3 |
| <i>circBAZ2B</i> | miR-607          | 5 |
| <i>circBAZ2B</i> | miR-6071         | 1 |
| <i>circBAZ2B</i> | miR-6074         | 1 |
| <i>circBAZ2B</i> | miR-6076/6797-3p | 2 |

|                  |                                      |   |
|------------------|--------------------------------------|---|
| <i>circBAZ2B</i> | miR-6077                             | 5 |
| <i>circBAZ2B</i> | miR-6079                             | 7 |
| <i>circBAZ2B</i> | miR-6080                             | 1 |
| <i>circBAZ2B</i> | miR-6081                             | 2 |
| <i>circBAZ2B</i> | miR-6083                             | 2 |
| <i>circBAZ2B</i> | miR-6085/6813-5p                     | 2 |
| <i>circBAZ2B</i> | miR-612/1285-3p/3187-5p/5189-5p/6860 | 1 |
| <i>circBAZ2B</i> | miR-6124                             | 5 |
| <i>circBAZ2B</i> | miR-6125                             | 2 |
| <i>circBAZ2B</i> | miR-6126                             | 3 |
| <i>circBAZ2B</i> | miR-6128                             | 3 |
| <i>circBAZ2B</i> | miR-6131                             | 1 |
| <i>circBAZ2B</i> | miR-616-3p                           | 2 |
| <i>circBAZ2B</i> | miR-617                              | 3 |
| <i>circBAZ2B</i> | miR-619-3p                           | 1 |
| <i>circBAZ2B</i> | miR-619-5p/6506-5p                   | 1 |
| <i>circBAZ2B</i> | miR-622                              | 1 |
| <i>circBAZ2B</i> | miR-623                              | 1 |
| <i>circBAZ2B</i> | miR-624-3p                           | 1 |
| <i>circBAZ2B</i> | miR-624-5p                           | 2 |
| <i>circBAZ2B</i> | miR-625-5p                           | 1 |
| <i>circBAZ2B</i> | miR-626/6876-3p                      | 2 |
| <i>circBAZ2B</i> | miR-627-3p                           | 2 |
| <i>circBAZ2B</i> | miR-627-5p                           | 1 |
| <i>circBAZ2B</i> | miR-628-3p                           | 2 |
| <i>circBAZ2B</i> | miR-628-5p                           | 3 |
| <i>circBAZ2B</i> | miR-629-3p                           | 2 |
| <i>circBAZ2B</i> | miR-630                              | 2 |
| <i>circBAZ2B</i> | miR-635/6774-5p                      | 1 |
| <i>circBAZ2B</i> | miR-636                              | 1 |
| <i>circBAZ2B</i> | miR-637                              | 1 |
| <i>circBAZ2B</i> | miR-640                              | 3 |
| <i>circBAZ2B</i> | miR-641/3617-5p                      | 2 |
| <i>circBAZ2B</i> | miR-644a                             | 2 |
| <i>circBAZ2B</i> | miR-646                              | 3 |
| <i>circBAZ2B</i> | miR-647                              | 2 |
| <i>circBAZ2B</i> | miR-648                              | 1 |
| <i>circBAZ2B</i> | miR-649                              | 4 |

|                  |                  |   |
|------------------|------------------|---|
| <i>circBAZ2B</i> | miR-6499-3p      | 2 |
| <i>circBAZ2B</i> | miR-6501-3p      | 2 |
| <i>circBAZ2B</i> | miR-6501-5p      | 2 |
| <i>circBAZ2B</i> | miR-6502-3p      | 3 |
| <i>circBAZ2B</i> | miR-6503-3p      | 1 |
| <i>circBAZ2B</i> | miR-6504-3p      | 3 |
| <i>circBAZ2B</i> | miR-6505-3p      | 3 |
| <i>circBAZ2B</i> | miR-6507-3p      | 2 |
| <i>circBAZ2B</i> | miR-6507-5p      | 4 |
| <i>circBAZ2B</i> | miR-6508-5p/8067 | 7 |
| <i>circBAZ2B</i> | miR-651-3p       | 8 |
| <i>circBAZ2B</i> | miR-6512-5p      | 1 |
| <i>circBAZ2B</i> | miR-6513-3p      | 5 |
| <i>circBAZ2B</i> | miR-6514-5p      | 3 |
| <i>circBAZ2B</i> | miR-6515-3p      | 3 |
| <i>circBAZ2B</i> | miR-652-5p       | 2 |
| <i>circBAZ2B</i> | miR-653-3p       | 2 |
| <i>circBAZ2B</i> | miR-653-5p       | 1 |
| <i>circBAZ2B</i> | miR-655-5p       | 2 |
| <i>circBAZ2B</i> | miR-656-3p       | 2 |
| <i>circBAZ2B</i> | miR-659-3p       | 3 |
| <i>circBAZ2B</i> | miR-659-5p       | 1 |
| <i>circBAZ2B</i> | miR-660-3p       | 1 |
| <i>circBAZ2B</i> | miR-664a-3p      | 2 |
| <i>circBAZ2B</i> | miR-664a-5p/4794 | 7 |
| <i>circBAZ2B</i> | miR-664b-5p      | 2 |
| <i>circBAZ2B</i> | miR-665          | 2 |
| <i>circBAZ2B</i> | miR-670-5p       | 1 |
| <i>circBAZ2B</i> | miR-671-5p       | 5 |
| <i>circBAZ2B</i> | miR-6715a-3p     | 5 |
| <i>circBAZ2B</i> | miR-6715b-3p     | 4 |
| <i>circBAZ2B</i> | miR-6720-5p      | 3 |
| <i>circBAZ2B</i> | miR-6721-5p      | 1 |
| <i>circBAZ2B</i> | miR-6723-5p      | 1 |
| <i>circBAZ2B</i> | miR-6727-5p      | 1 |
| <i>circBAZ2B</i> | miR-6729-3p      | 1 |
| <i>circBAZ2B</i> | miR-6730-5p      | 6 |
| <i>circBAZ2B</i> | miR-6731-3p      | 2 |

|                  |                     |   |
|------------------|---------------------|---|
| <i>circBAZ2B</i> | miR-6731-5p/8085    | 1 |
| <i>circBAZ2B</i> | miR-6736-3p         | 5 |
| <i>circBAZ2B</i> | miR-6738-3p         | 2 |
| <i>circBAZ2B</i> | miR-6739-3p         | 3 |
| <i>circBAZ2B</i> | miR-6740-3p         | 2 |
| <i>circBAZ2B</i> | miR-6740-5p         | 2 |
| <i>circBAZ2B</i> | miR-6741-5p         | 5 |
| <i>circBAZ2B</i> | miR-6742-5p         | 1 |
| <i>circBAZ2B</i> | miR-6744-5p         | 3 |
| <i>circBAZ2B</i> | miR-6747-3p         | 1 |
| <i>circBAZ2B</i> | miR-675-3p          | 8 |
| <i>circBAZ2B</i> | miR-6750-5p/6822-5p | 1 |
| <i>circBAZ2B</i> | miR-6751-5p/6803-5p | 1 |
| <i>circBAZ2B</i> | miR-6752-3p         | 1 |
| <i>circBAZ2B</i> | miR-6753-5p         | 2 |
| <i>circBAZ2B</i> | miR-6755-3p         | 1 |
| <i>circBAZ2B</i> | miR-6756-5p/6766-5p | 1 |
| <i>circBAZ2B</i> | miR-6757-5p         | 3 |
| <i>circBAZ2B</i> | miR-6758-3p         | 1 |
| <i>circBAZ2B</i> | miR-6759-5p         | 2 |
| <i>circBAZ2B</i> | miR-676-3p          | 5 |
| <i>circBAZ2B</i> | miR-676-5p          | 4 |
| <i>circBAZ2B</i> | miR-6760-3p         | 3 |
| <i>circBAZ2B</i> | miR-6760-5p         | 3 |
| <i>circBAZ2B</i> | miR-6764-3p/6824-3p | 2 |
| <i>circBAZ2B</i> | miR-6765-5p         | 4 |
| <i>circBAZ2B</i> | miR-6768-3p         | 4 |
| <i>circBAZ2B</i> | miR-6768-5p         | 2 |
| <i>circBAZ2B</i> | miR-6769a-3p        | 1 |
| <i>circBAZ2B</i> | miR-6770-5p         | 1 |
| <i>circBAZ2B</i> | miR-6772-3p         | 1 |
| <i>circBAZ2B</i> | miR-6777-3p         | 1 |
| <i>circBAZ2B</i> | miR-6778-3p         | 1 |
| <i>circBAZ2B</i> | miR-6780a-3p        | 5 |
| <i>circBAZ2B</i> | miR-6780b-3p        | 1 |
| <i>circBAZ2B</i> | miR-6782-3p         | 1 |
| <i>circBAZ2B</i> | miR-6783-5p         | 4 |
| <i>circBAZ2B</i> | miR-6786-3p         | 1 |

|                  |                     |   |
|------------------|---------------------|---|
| <i>circBAZ2B</i> | miR-6786-5p         | 1 |
| <i>circBAZ2B</i> | miR-6787-3p         | 4 |
| <i>circBAZ2B</i> | miR-6789-5p         | 3 |
| <i>circBAZ2B</i> | miR-6791-3p/6829-3p | 1 |
| <i>circBAZ2B</i> | miR-6792-5p         | 1 |
| <i>circBAZ2B</i> | miR-6793-3p         | 3 |
| <i>circBAZ2B</i> | miR-6794-3p         | 1 |
| <i>circBAZ2B</i> | miR-6795-5p/6887-5p | 1 |
| <i>circBAZ2B</i> | miR-6796-3p         | 4 |
| <i>circBAZ2B</i> | miR-6796-5p         | 2 |
| <i>circBAZ2B</i> | miR-6798-3p         | 1 |
| <i>circBAZ2B</i> | miR-6799-5p         | 3 |
| <i>circBAZ2B</i> | miR-6800-3p         | 1 |
| <i>circBAZ2B</i> | miR-6801-5p         | 4 |
| <i>circBAZ2B</i> | miR-6809-3p         | 2 |
| <i>circBAZ2B</i> | miR-6810-5p         | 1 |
| <i>circBAZ2B</i> | miR-6815-5p/6865-5p | 2 |
| <i>circBAZ2B</i> | miR-6816-3p         | 1 |
| <i>circBAZ2B</i> | miR-6817-3p         | 2 |
| <i>circBAZ2B</i> | miR-6818-3p         | 2 |
| <i>circBAZ2B</i> | miR-6822-3p         | 3 |
| <i>circBAZ2B</i> | miR-6824-5p         | 3 |
| <i>circBAZ2B</i> | miR-6825-3p         | 1 |
| <i>circBAZ2B</i> | miR-6828-3p         | 1 |
| <i>circBAZ2B</i> | miR-6828-5p         | 5 |
| <i>circBAZ2B</i> | miR-6830-3p         | 3 |
| <i>circBAZ2B</i> | miR-6830-5p         | 3 |
| <i>circBAZ2B</i> | miR-6833-5p         | 6 |
| <i>circBAZ2B</i> | miR-6834-3p         | 2 |
| <i>circBAZ2B</i> | miR-6836-3p         | 4 |
| <i>circBAZ2B</i> | miR-6837-3p         | 2 |
| <i>circBAZ2B</i> | miR-6838-3p         | 3 |
| <i>circBAZ2B</i> | miR-6842-3p         | 2 |
| <i>circBAZ2B</i> | miR-6844            | 2 |
| <i>circBAZ2B</i> | miR-6845-3p         | 1 |
| <i>circBAZ2B</i> | miR-6846-3p         | 1 |
| <i>circBAZ2B</i> | miR-6847-5p         | 3 |
| <i>circBAZ2B</i> | miR-6854-5p         | 2 |

|                  |             |   |
|------------------|-------------|---|
| <i>circBAZ2B</i> | miR-6857-3p | 2 |
| <i>circBAZ2B</i> | miR-6857-5p | 1 |
| <i>circBAZ2B</i> | miR-6859-3p | 1 |
| <i>circBAZ2B</i> | miR-6861-3p | 1 |
| <i>circBAZ2B</i> | miR-6864-5p | 3 |
| <i>circBAZ2B</i> | miR-6865-3p | 1 |
| <i>circBAZ2B</i> | miR-6867-3p | 1 |
| <i>circBAZ2B</i> | miR-6867-5p | 1 |
| <i>circBAZ2B</i> | miR-6868-3p | 4 |
| <i>circBAZ2B</i> | miR-6868-5p | 2 |
| <i>circBAZ2B</i> | miR-6869-5p | 1 |
| <i>circBAZ2B</i> | miR-6871-5p | 1 |
| <i>circBAZ2B</i> | miR-6873-3p | 2 |
| <i>circBAZ2B</i> | miR-6873-5p | 3 |
| <i>circBAZ2B</i> | miR-6874-5p | 2 |
| <i>circBAZ2B</i> | miR-6875-3p | 4 |
| <i>circBAZ2B</i> | miR-6878-5p | 1 |
| <i>circBAZ2B</i> | miR-6879-3p | 1 |
| <i>circBAZ2B</i> | miR-6880-5p | 3 |
| <i>circBAZ2B</i> | miR-6881-3p | 5 |
| <i>circBAZ2B</i> | miR-6885-3p | 5 |
| <i>circBAZ2B</i> | miR-6888-5p | 5 |
| <i>circBAZ2B</i> | miR-6894-5p | 3 |
| <i>circBAZ2B</i> | miR-7-3p    | 4 |
| <i>circBAZ2B</i> | miR-7-5p    | 5 |
| <i>circBAZ2B</i> | miR-708-3p  | 3 |
| <i>circBAZ2B</i> | miR-7106-5p | 3 |
| <i>circBAZ2B</i> | miR-7109-3p | 2 |
| <i>circBAZ2B</i> | miR-7109-5p | 1 |
| <i>circBAZ2B</i> | miR-7110-3p | 2 |
| <i>circBAZ2B</i> | miR-7111-3p | 5 |
| <i>circBAZ2B</i> | miR-7112-3p | 5 |
| <i>circBAZ2B</i> | miR-7113-5p | 1 |
| <i>circBAZ2B</i> | miR-7114-5p | 2 |
| <i>circBAZ2B</i> | miR-7151-5p | 1 |
| <i>circBAZ2B</i> | miR-7152-3p | 3 |
| <i>circBAZ2B</i> | miR-7152-5p | 4 |
| <i>circBAZ2B</i> | miR-7153-3p | 1 |



|                  |             |   |
|------------------|-------------|---|
| <i>circBAZ2B</i> | miR-7154-3p | 3 |
| <i>circBAZ2B</i> | miR-7155-5p | 1 |
| <i>circBAZ2B</i> | miR-7156-3p | 3 |
| <i>circBAZ2B</i> | miR-7158-3p | 3 |
| <i>circBAZ2B</i> | miR-7158-5p | 2 |
| <i>circBAZ2B</i> | miR-7159-5p | 4 |
| <i>circBAZ2B</i> | miR-7160-5p | 1 |
| <i>circBAZ2B</i> | miR-7161-3p | 4 |
| <i>circBAZ2B</i> | miR-744-3p  | 3 |
| <i>circBAZ2B</i> | miR-7515    | 2 |
| <i>circBAZ2B</i> | miR-758-3p  | 5 |
| <i>circBAZ2B</i> | miR-758-5p  | 1 |
| <i>circBAZ2B</i> | miR-759     | 5 |
| <i>circBAZ2B</i> | miR-760     | 3 |
| <i>circBAZ2B</i> | miR-7641    | 1 |
| <i>circBAZ2B</i> | miR-765     | 3 |
| <i>circBAZ2B</i> | miR-766-3p  | 4 |
| <i>circBAZ2B</i> | miR-766-5p  | 3 |
| <i>circBAZ2B</i> | miR-767-3p  | 2 |
| <i>circBAZ2B</i> | miR-767-5p  | 1 |
| <i>circBAZ2B</i> | miR-770-5p  | 1 |
| <i>circBAZ2B</i> | miR-7703    | 2 |
| <i>circBAZ2B</i> | miR-7705    | 2 |
| <i>circBAZ2B</i> | miR-7844-5p | 3 |
| <i>circBAZ2B</i> | miR-7846-3p | 2 |
| <i>circBAZ2B</i> | miR-7847-3p | 5 |
| <i>circBAZ2B</i> | miR-7850-5p | 4 |
| <i>circBAZ2B</i> | miR-7851-3p | 1 |
| <i>circBAZ2B</i> | miR-7852-3p | 2 |
| <i>circBAZ2B</i> | miR-7855-5p | 5 |
| <i>circBAZ2B</i> | miR-7973    | 1 |
| <i>circBAZ2B</i> | miR-7975    | 1 |
| <i>circBAZ2B</i> | miR-7978    | 2 |
| <i>circBAZ2B</i> | miR-802     | 2 |
| <i>circBAZ2B</i> | miR-8055    | 4 |
| <i>circBAZ2B</i> | miR-8056    | 1 |
| <i>circBAZ2B</i> | miR-8057    | 3 |
| <i>circBAZ2B</i> | miR-8062    | 3 |

|                  |                         |   |
|------------------|-------------------------|---|
| <i>circBAZ2B</i> | miR-8064                | 1 |
| <i>circBAZ2B</i> | miR-8065                | 2 |
| <i>circBAZ2B</i> | miR-8066                | 3 |
| <i>circBAZ2B</i> | miR-8068                | 2 |
| <i>circBAZ2B</i> | miR-8069                | 2 |
| <i>circBAZ2B</i> | miR-8070                | 6 |
| <i>circBAZ2B</i> | miR-8071                | 3 |
| <i>circBAZ2B</i> | miR-8075                | 2 |
| <i>circBAZ2B</i> | miR-8077                | 1 |
| <i>circBAZ2B</i> | miR-8078                | 1 |
| <i>circBAZ2B</i> | miR-8080                | 1 |
| <i>circBAZ2B</i> | miR-8081                | 3 |
| <i>circBAZ2B</i> | miR-8083                | 5 |
| <i>circBAZ2B</i> | miR-8084                | 1 |
| <i>circBAZ2B</i> | miR-8087                | 4 |
| <i>circBAZ2B</i> | miR-873-3p              | 1 |
| <i>circBAZ2B</i> | miR-875-3p              | 4 |
| <i>circBAZ2B</i> | miR-876-3p              | 3 |
| <i>circBAZ2B</i> | miR-876-5p              | 5 |
| <i>circBAZ2B</i> | miR-877-3p              | 1 |
| <i>circBAZ2B</i> | miR-885-3p              | 1 |
| <i>circBAZ2B</i> | miR-888-5p              | 1 |
| <i>circBAZ2B</i> | miR-889-3p              | 1 |
| <i>circBAZ2B</i> | miR-890                 | 2 |
| <i>circBAZ2B</i> | miR-891a-3p             | 1 |
| <i>circBAZ2B</i> | miR-891a-5p             | 1 |
| <i>circBAZ2B</i> | miR-891b                | 2 |
| <i>circBAZ2B</i> | miR-892-5p              | 2 |
| <i>circBAZ2B</i> | miR-892a                | 3 |
| <i>circBAZ2B</i> | miR-892b                | 2 |
| <i>circBAZ2B</i> | miR-9-3p                | 3 |
| <i>circBAZ2B</i> | miR-9-5p                | 3 |
| <i>circBAZ2B</i> | miR-92a-1-5p            | 3 |
| <i>circBAZ2B</i> | miR-93-3p               | 3 |
| <i>circBAZ2B</i> | miR-935                 | 1 |
| <i>circBAZ2B</i> | miR-936                 | 4 |
| <i>circBAZ2B</i> | miR-937-5p              | 1 |
| <i>circBAZ2B</i> | miR-940/6808-5p/6893-5p | 2 |

|                  |                          |    |
|------------------|--------------------------|----|
| <i>circBAZ2B</i> | miR-942-5p               | 2  |
| <i>circBAZ2B</i> | miR-943                  | 1  |
| <i>circBAZ2B</i> | miR-944                  | 1  |
| <i>circBAZ2B</i> | miR-9500                 | 1  |
| <i>circBAZ2B</i> | miR-99-3p                | 4  |
| <i>circBPTF</i>  | let-7-5p/98-5p           | 1  |
| <i>circBPTF</i>  | miR-1-3p/206             | 3  |
| <i>circBPTF</i>  | miR-103a-2-5p            | 4  |
| <i>circBPTF</i>  | miR-106a-3p              | 1  |
| <i>circBPTF</i>  | miR-1183                 | 2  |
| <i>circBPTF</i>  | miR-1199-5p/6751-3p      | 18 |
| <i>circBPTF</i>  | miR-1207-3p              | 3  |
| <i>circBPTF</i>  | miR-1208                 | 1  |
| <i>circBPTF</i>  | miR-122-5p               | 1  |
| <i>circBPTF</i>  | miR-1225-3p              | 2  |
| <i>circBPTF</i>  | miR-1237-3p              | 1  |
| <i>circBPTF</i>  | miR-1237-5p/4488/4697-5p | 1  |
| <i>circBPTF</i>  | miR-1238-3p              | 1  |
| <i>circBPTF</i>  | miR-1243                 | 2  |
| <i>circBPTF</i>  | miR-1244                 | 2  |
| <i>circBPTF</i>  | miR-1245b-3p             | 1  |
| <i>circBPTF</i>  | miR-1248                 | 1  |
| <i>circBPTF</i>  | miR-1250-3p              | 1  |
| <i>circBPTF</i>  | miR-1257                 | 1  |
| <i>circBPTF</i>  | miR-125a-3p              | 1  |
| <i>circBPTF</i>  | miR-1263                 | 1  |
| <i>circBPTF</i>  | miR-1267                 | 2  |
| <i>circBPTF</i>  | miR-1270                 | 2  |
| <i>circBPTF</i>  | miR-1273c                | 1  |
| <i>circBPTF</i>  | miR-1273d                | 1  |
| <i>circBPTF</i>  | miR-1273e                | 2  |
| <i>circBPTF</i>  | miR-1273f                | 3  |
| <i>circBPTF</i>  | miR-1273g-5p             | 3  |
| <i>circBPTF</i>  | miR-1275/4665-5p         | 1  |
| <i>circBPTF</i>  | miR-128-1-5p             | 1  |
| <i>circBPTF</i>  | miR-1284                 | 3  |
| <i>circBPTF</i>  | miR-1286                 | 1  |
| <i>circBPTF</i>  | miR-1287-5p              | 6  |

|                 |                     |   |
|-----------------|---------------------|---|
| <i>circBPTF</i> | miR-1291/6775-3p    | 1 |
| <i>circBPTF</i> | miR-1295b-5p/1912   | 1 |
| <i>circBPTF</i> | miR-133a-5p         | 4 |
| <i>circBPTF</i> | miR-134-5p          | 4 |
| <i>circBPTF</i> | miR-1343-3p         | 1 |
| <i>circBPTF</i> | miR-138-5p          | 4 |
| <i>circBPTF</i> | miR-139-3p          | 1 |
| <i>circBPTF</i> | miR-140-5p          | 3 |
| <i>circBPTF</i> | miR-142-3p.1        | 1 |
| <i>circBPTF</i> | miR-142-3p.2        | 1 |
| <i>circBPTF</i> | miR-142-5p          | 1 |
| <i>circBPTF</i> | miR-143-3p          | 3 |
| <i>circBPTF</i> | miR-145-3p          | 1 |
| <i>circBPTF</i> | miR-145-5p          | 1 |
| <i>circBPTF</i> | miR-146a-3p         | 4 |
| <i>circBPTF</i> | miR-146b-3p         | 1 |
| <i>circBPTF</i> | miR-148a-5p         | 1 |
| <i>circBPTF</i> | miR-148b-5p/6874-3p | 1 |
| <i>circBPTF</i> | miR-149-5p          | 1 |
| <i>circBPTF</i> | miR-150-3p          | 1 |
| <i>circBPTF</i> | miR-1537-5p         | 2 |
| <i>circBPTF</i> | miR-1587/3620-5p    | 4 |
| <i>circBPTF</i> | miR-181-3p/4420     | 1 |
| <i>circBPTF</i> | miR-182-3p          | 2 |
| <i>circBPTF</i> | miR-183-3p          | 4 |
| <i>circBPTF</i> | miR-183-5p.2        | 1 |
| <i>circBPTF</i> | miR-185-3p          | 1 |
| <i>circBPTF</i> | miR-185-5p          | 1 |
| <i>circBPTF</i> | miR-19-5p           | 4 |
| <i>circBPTF</i> | miR-1914-5p         | 2 |
| <i>circBPTF</i> | miR-1915-3p/6764-5p | 1 |
| <i>circBPTF</i> | miR-1915-5p         | 1 |
| <i>circBPTF</i> | miR-192-5p/215-5p   | 1 |
| <i>circBPTF</i> | miR-193-3p          | 1 |
| <i>circBPTF</i> | miR-202-5p          | 1 |
| <i>circBPTF</i> | miR-203a-5p         | 3 |
| <i>circBPTF</i> | miR-203b-5p/6718-5p | 1 |
| <i>circBPTF</i> | miR-2052            | 4 |

|                 |                     |    |
|-----------------|---------------------|----|
| <i>circBPTF</i> | miR-2054            | 1  |
| <i>circBPTF</i> | miR-20b-3p          | 1  |
| <i>circBPTF</i> | miR-2110            | 5  |
| <i>circBPTF</i> | miR-2114-3p         | 1  |
| <i>circBPTF</i> | miR-2116-5p         | 1  |
| <i>circBPTF</i> | miR-214-5p          | 2  |
| <i>circBPTF</i> | miR-216b-3p         | 1  |
| <i>circBPTF</i> | miR-218-1-3p        | 2  |
| <i>circBPTF</i> | miR-218-2-3p        | 2  |
| <i>circBPTF</i> | miR-218-5p          | 7  |
| <i>circBPTF</i> | miR-219a-2-3p       | 3  |
| <i>circBPTF</i> | miR-219b-3p         | 3  |
| <i>circBPTF</i> | miR-22-5p           | 1  |
| <i>circBPTF</i> | miR-23-5p           | 2  |
| <i>circBPTF</i> | miR-27-3p           | 1  |
| <i>circBPTF</i> | miR-2861            | 1  |
| <i>circBPTF</i> | miR-299-3p          | 3  |
| <i>circBPTF</i> | miR-302f            | 2  |
| <i>circBPTF</i> | miR-3064-5p         | 1  |
| <i>circBPTF</i> | miR-3074-5p         | 1  |
| <i>circBPTF</i> | miR-3115            | 1  |
| <i>circBPTF</i> | miR-3124-3p         | 1  |
| <i>circBPTF</i> | miR-3128            | 2  |
| <i>circBPTF</i> | miR-3130-5p/4482-5p | 1  |
| <i>circBPTF</i> | miR-3134            | 9  |
| <i>circBPTF</i> | miR-3135b           | 6  |
| <i>circBPTF</i> | miR-3136-5p/4439    | 11 |
| <i>circBPTF</i> | miR-3137            | 1  |
| <i>circBPTF</i> | miR-3140-5p         | 1  |
| <i>circBPTF</i> | miR-3141            | 1  |
| <i>circBPTF</i> | miR-3147            | 4  |
| <i>circBPTF</i> | miR-3150a-3p        | 5  |
| <i>circBPTF</i> | miR-3152-5p         | 2  |
| <i>circBPTF</i> | miR-3164            | 4  |
| <i>circBPTF</i> | miR-3168            | 1  |
| <i>circBPTF</i> | miR-3169            | 1  |
| <i>circBPTF</i> | miR-3173-5p         | 1  |
| <i>circBPTF</i> | miR-3176/3922-3p    | 3  |

|                 |                           |    |
|-----------------|---------------------------|----|
| <i>circBPTF</i> | miR-3180-5p               | 1  |
| <i>circBPTF</i> | miR-3182                  | 4  |
| <i>circBPTF</i> | miR-3190-3p               | 1  |
| <i>circBPTF</i> | miR-3190-5p               | 3  |
| <i>circBPTF</i> | miR-3193                  | 1  |
| <i>circBPTF</i> | miR-3198/4309             | 6  |
| <i>circBPTF</i> | miR-3200-5p               | 5  |
| <i>circBPTF</i> | miR-323b-5p/410-5p/494-5p | 11 |
| <i>circBPTF</i> | miR-339-5p                | 1  |
| <i>circBPTF</i> | miR-33a-3p                | 2  |
| <i>circBPTF</i> | miR-34-5p/449-5p          | 1  |
| <i>circBPTF</i> | miR-345-3p                | 1  |
| <i>circBPTF</i> | miR-345-5p                | 1  |
| <i>circBPTF</i> | miR-34b-3p                | 1  |
| <i>circBPTF</i> | miR-34c-3p                | 1  |
| <i>circBPTF</i> | miR-3606-5p               | 1  |
| <i>circBPTF</i> | miR-3611                  | 1  |
| <i>circBPTF</i> | miR-3613-5p               | 3  |
| <i>circBPTF</i> | miR-3652/4430             | 15 |
| <i>circBPTF</i> | miR-3654                  | 2  |
| <i>circBPTF</i> | miR-3668                  | 1  |
| <i>circBPTF</i> | miR-367-5p                | 2  |
| <i>circBPTF</i> | miR-3674                  | 4  |
| <i>circBPTF</i> | miR-3675-5p               | 1  |
| <i>circBPTF</i> | miR-3677-5p               | 1  |
| <i>circBPTF</i> | miR-3680-3p               | 2  |
| <i>circBPTF</i> | miR-3681-5p               | 1  |
| <i>circBPTF</i> | miR-3683                  | 1  |
| <i>circBPTF</i> | miR-3685                  | 1  |
| <i>circBPTF</i> | miR-3688-3p               | 1  |
| <i>circBPTF</i> | miR-3688-5p               | 5  |
| <i>circBPTF</i> | miR-3692-5p               | 6  |
| <i>circBPTF</i> | miR-375                   | 3  |
| <i>circBPTF</i> | miR-378g                  | 4  |
| <i>circBPTF</i> | miR-378j/6839-5p          | 1  |
| <i>circBPTF</i> | miR-380-3p                | 1  |
| <i>circBPTF</i> | miR-382-5p                | 1  |
| <i>circBPTF</i> | miR-384                   | 1  |

|                 |                           |    |
|-----------------|---------------------------|----|
| <i>circBPTF</i> | miR-3907                  | 1  |
| <i>circBPTF</i> | miR-3918                  | 1  |
| <i>circBPTF</i> | miR-3925-3p               | 1  |
| <i>circBPTF</i> | miR-3934-5p               | 1  |
| <i>circBPTF</i> | miR-411-5p.2              | 1  |
| <i>circBPTF</i> | miR-4252                  | 1  |
| <i>circBPTF</i> | miR-4255                  | 1  |
| <i>circBPTF</i> | miR-4256                  | 1  |
| <i>circBPTF</i> | miR-4260                  | 9  |
| <i>circBPTF</i> | miR-4263                  | 1  |
| <i>circBPTF</i> | miR-4271/4725-3p/6780b-5p | 1  |
| <i>circBPTF</i> | miR-4273/7156-5p          | 1  |
| <i>circBPTF</i> | miR-4293                  | 1  |
| <i>circBPTF</i> | miR-4299                  | 5  |
| <i>circBPTF</i> | miR-4303                  | 3  |
| <i>circBPTF</i> | miR-4312                  | 3  |
| <i>circBPTF</i> | miR-4324                  | 1  |
| <i>circBPTF</i> | miR-4326                  | 1  |
| <i>circBPTF</i> | miR-4328                  | 4  |
| <i>circBPTF</i> | miR-4425                  | 4  |
| <i>circBPTF</i> | miR-4427                  | 3  |
| <i>circBPTF</i> | miR-4452                  | 4  |
| <i>circBPTF</i> | miR-4456                  | 5  |
| <i>circBPTF</i> | miR-4460                  | 1  |
| <i>circBPTF</i> | miR-4464/4748             | 2  |
| <i>circBPTF</i> | miR-4474-3p               | 8  |
| <i>circBPTF</i> | miR-4476/6876-5p          | 1  |
| <i>circBPTF</i> | miR-4481/4745-5p          | 1  |
| <i>circBPTF</i> | miR-4486                  | 4  |
| <i>circBPTF</i> | miR-4490                  | 1  |
| <i>circBPTF</i> | miR-4491/4657             | 3  |
| <i>circBPTF</i> | miR-4505/5787             | 15 |
| <i>circBPTF</i> | miR-450a-2-3p             | 9  |
| <i>circBPTF</i> | miR-450b-5p               | 2  |
| <i>circBPTF</i> | miR-452-5p/892-3p         | 2  |
| <i>circBPTF</i> | miR-4524-5p               | 1  |
| <i>circBPTF</i> | miR-4531                  | 2  |
| <i>circBPTF</i> | miR-4534/8082             | 9  |

|                 |                             |    |
|-----------------|-----------------------------|----|
| <i>circBPTF</i> | miR-4635                    | 1  |
| <i>circBPTF</i> | miR-4640-5p                 | 1  |
| <i>circBPTF</i> | miR-4649-3p                 | 2  |
| <i>circBPTF</i> | miR-4649-5p/6729-5p         | 1  |
| <i>circBPTF</i> | miR-4652-3p                 | 2  |
| <i>circBPTF</i> | miR-4656                    | 13 |
| <i>circBPTF</i> | miR-4659a-5p/4659b-5p       | 1  |
| <i>circBPTF</i> | miR-4660                    | 1  |
| <i>circBPTF</i> | miR-4670-3p                 | 1  |
| <i>circBPTF</i> | miR-4670-5p                 | 1  |
| <i>circBPTF</i> | miR-4674                    | 4  |
| <i>circBPTF</i> | miR-4675/4741               | 13 |
| <i>circBPTF</i> | miR-4677-3p                 | 4  |
| <i>circBPTF</i> | miR-4677-5p                 | 1  |
| <i>circBPTF</i> | miR-4678                    | 3  |
| <i>circBPTF</i> | miR-4679                    | 4  |
| <i>circBPTF</i> | miR-4680-3p                 | 3  |
| <i>circBPTF</i> | miR-4683                    | 1  |
| <i>circBPTF</i> | miR-4684-3p                 | 1  |
| <i>circBPTF</i> | miR-4685-5p/6837-5p         | 1  |
| <i>circBPTF</i> | miR-4687-3p                 | 1  |
| <i>circBPTF</i> | miR-4691-5p/6792-3p         | 1  |
| <i>circBPTF</i> | miR-4693-5p                 | 1  |
| <i>circBPTF</i> | miR-4694-5p                 | 2  |
| <i>circBPTF</i> | miR-4699-3p                 | 1  |
| <i>circBPTF</i> | miR-4705                    | 1  |
| <i>circBPTF</i> | miR-4708-5p                 | 3  |
| <i>circBPTF</i> | miR-4716-5p                 | 1  |
| <i>circBPTF</i> | miR-4718                    | 2  |
| <i>circBPTF</i> | miR-4720-3p                 | 1  |
| <i>circBPTF</i> | miR-4720-5p/4799-3p/5588-5p | 2  |
| <i>circBPTF</i> | miR-4722-3p/6727-3p         | 1  |
| <i>circBPTF</i> | miR-4722-5p                 | 1  |
| <i>circBPTF</i> | miR-4726-3p                 | 1  |
| <i>circBPTF</i> | miR-4727-3p                 | 1  |
| <i>circBPTF</i> | miR-4729                    | 1  |
| <i>circBPTF</i> | miR-4735-5p                 | 1  |
| <i>circBPTF</i> | miR-4743-3p                 | 2  |



|                 |                             |   |
|-----------------|-----------------------------|---|
| <i>circBPTF</i> | miR-4747-3p                 | 1 |
| <i>circBPTF</i> | miR-4747-5p/5196-5p         | 3 |
| <i>circBPTF</i> | miR-4750-3p                 | 1 |
| <i>circBPTF</i> | miR-4759                    | 1 |
| <i>circBPTF</i> | miR-4766-3p                 | 1 |
| <i>circBPTF</i> | miR-4769-3p/6817-5p         | 1 |
| <i>circBPTF</i> | miR-4774-3p                 | 2 |
| <i>circBPTF</i> | miR-4774-5p                 | 1 |
| <i>circBPTF</i> | miR-4775                    | 1 |
| <i>circBPTF</i> | miR-4795-5p                 | 1 |
| <i>circBPTF</i> | miR-4796-3p                 | 1 |
| <i>circBPTF</i> | miR-4804-3p                 | 1 |
| <i>circBPTF</i> | miR-486-5p                  | 4 |
| <i>circBPTF</i> | miR-488-3p                  | 1 |
| <i>circBPTF</i> | miR-495-5p                  | 1 |
| <i>circBPTF</i> | miR-4999-5p                 | 2 |
| <i>circBPTF</i> | miR-5000-3p                 | 1 |
| <i>circBPTF</i> | miR-5002-5p                 | 1 |
| <i>circBPTF</i> | miR-5003-3p                 | 1 |
| <i>circBPTF</i> | miR-5008-3p/6737-3p/7157-3p | 6 |
| <i>circBPTF</i> | miR-5008-5p                 | 1 |
| <i>circBPTF</i> | miR-502-5p                  | 4 |
| <i>circBPTF</i> | miR-505-5p                  | 1 |
| <i>circBPTF</i> | miR-507/557                 | 2 |
| <i>circBPTF</i> | miR-5087                    | 4 |
| <i>circBPTF</i> | miR-513a-5p                 | 1 |
| <i>circBPTF</i> | miR-5187-3p                 | 3 |
| <i>circBPTF</i> | miR-5192                    | 1 |
| <i>circBPTF</i> | miR-525-5p                  | 1 |
| <i>circBPTF</i> | miR-539-3p                  | 1 |
| <i>circBPTF</i> | miR-544a                    | 6 |
| <i>circBPTF</i> | miR-544b                    | 1 |
| <i>circBPTF</i> | miR-548ao-5p/548ax          | 2 |
| <i>circBPTF</i> | miR-548at-5p                | 1 |
| <i>circBPTF</i> | miR-548au-3p                | 1 |
| <i>circBPTF</i> | miR-548m                    | 2 |
| <i>circBPTF</i> | miR-548p                    | 1 |
| <i>circBPTF</i> | miR-548q                    | 5 |

|                 |                                      |   |
|-----------------|--------------------------------------|---|
| <i>circBPTF</i> | miR-552-3p                           | 1 |
| <i>circBPTF</i> | miR-5571-3p                          | 1 |
| <i>circBPTF</i> | miR-5572                             | 9 |
| <i>circBPTF</i> | miR-5580-5p                          | 3 |
| <i>circBPTF</i> | miR-5584-3p                          | 1 |
| <i>circBPTF</i> | miR-5585-5p                          | 2 |
| <i>circBPTF</i> | miR-5589-3p                          | 1 |
| <i>circBPTF</i> | miR-5590-5p                          | 1 |
| <i>circBPTF</i> | miR-5591-3p                          | 1 |
| <i>circBPTF</i> | miR-561-3p                           | 1 |
| <i>circBPTF</i> | miR-562                              | 1 |
| <i>circBPTF</i> | miR-5681b                            | 1 |
| <i>circBPTF</i> | miR-573/3616-5p                      | 1 |
| <i>circBPTF</i> | miR-576-3p                           | 3 |
| <i>circBPTF</i> | miR-576-5p                           | 1 |
| <i>circBPTF</i> | miR-578                              | 1 |
| <i>circBPTF</i> | miR-580-5p                           | 1 |
| <i>circBPTF</i> | miR-581                              | 3 |
| <i>circBPTF</i> | miR-582-3p                           | 5 |
| <i>circBPTF</i> | miR-584-3p                           | 1 |
| <i>circBPTF</i> | miR-592                              | 1 |
| <i>circBPTF</i> | miR-596                              | 1 |
| <i>circBPTF</i> | miR-599                              | 1 |
| <i>circBPTF</i> | miR-6071                             | 6 |
| <i>circBPTF</i> | miR-6073                             | 1 |
| <i>circBPTF</i> | miR-6078                             | 1 |
| <i>circBPTF</i> | miR-6079                             | 1 |
| <i>circBPTF</i> | miR-6080                             | 1 |
| <i>circBPTF</i> | miR-6089                             | 1 |
| <i>circBPTF</i> | miR-612/1285-3p/3187-5p/5189-5p/6860 | 4 |
| <i>circBPTF</i> | miR-6128                             | 1 |
| <i>circBPTF</i> | miR-6131                             | 4 |
| <i>circBPTF</i> | miR-614                              | 1 |
| <i>circBPTF</i> | miR-624-5p                           | 1 |
| <i>circBPTF</i> | miR-626/6876-3p                      | 1 |
| <i>circBPTF</i> | miR-627-3p                           | 1 |
| <i>circBPTF</i> | miR-628-5p                           | 4 |
| <i>circBPTF</i> | miR-631/3661                         | 1 |

|                 |                     |    |
|-----------------|---------------------|----|
| <i>circBPTF</i> | miR-647             | 9  |
| <i>circBPTF</i> | miR-6501-3p         | 1  |
| <i>circBPTF</i> | miR-6505-5p         | 3  |
| <i>circBPTF</i> | miR-6508-3p         | 1  |
| <i>circBPTF</i> | miR-6511-5p         | 1  |
| <i>circBPTF</i> | miR-6512-5p         | 1  |
| <i>circBPTF</i> | miR-6514-3p         | 2  |
| <i>circBPTF</i> | miR-6516-5p         | 2  |
| <i>circBPTF</i> | miR-653-3p          | 1  |
| <i>circBPTF</i> | miR-659-3p          | 1  |
| <i>circBPTF</i> | miR-660-5p          | 1  |
| <i>circBPTF</i> | miR-664a-5p/4794    | 1  |
| <i>circBPTF</i> | miR-670-3p          | 1  |
| <i>circBPTF</i> | miR-6724-5p/6773-5p | 1  |
| <i>circBPTF</i> | miR-6738-3p         | 6  |
| <i>circBPTF</i> | miR-6740-5p         | 7  |
| <i>circBPTF</i> | miR-6742-3p         | 4  |
| <i>circBPTF</i> | miR-6747-3p         | 1  |
| <i>circBPTF</i> | miR-6749-3p         | 1  |
| <i>circBPTF</i> | miR-6751-5p/6803-5p | 1  |
| <i>circBPTF</i> | miR-6753-5p         | 1  |
| <i>circBPTF</i> | miR-676-3p          | 4  |
| <i>circBPTF</i> | miR-6760-3p         | 1  |
| <i>circBPTF</i> | miR-6762-5p/6845-5p | 1  |
| <i>circBPTF</i> | miR-6765-5p         | 4  |
| <i>circBPTF</i> | miR-6807-5p         | 2  |
| <i>circBPTF</i> | miR-6808-3p         | 4  |
| <i>circBPTF</i> | miR-6810-5p         | 5  |
| <i>circBPTF</i> | miR-6811-3p         | 2  |
| <i>circBPTF</i> | miR-6815-3p         | 4  |
| <i>circBPTF</i> | miR-6828-3p         | 6  |
| <i>circBPTF</i> | miR-6829-5p         | 13 |
| <i>circBPTF</i> | miR-6840-3p         | 1  |
| <i>circBPTF</i> | miR-6841-3p         | 1  |
| <i>circBPTF</i> | miR-6842-3p         | 9  |
| <i>circBPTF</i> | miR-6846-5p/6848-5p | 1  |
| <i>circBPTF</i> | miR-6851-3p         | 1  |
| <i>circBPTF</i> | miR-6852-5p         | 4  |

|                 |                           |    |
|-----------------|---------------------------|----|
| <i>circBPTF</i> | miR-6857-5p               | 5  |
| <i>circBPTF</i> | miR-6868-5p               | 2  |
| <i>circBPTF</i> | miR-6878-3p               | 3  |
| <i>circBPTF</i> | miR-6884-3p               | 1  |
| <i>circBPTF</i> | miR-6885-3p               | 5  |
| <i>circBPTF</i> | miR-6889-3p               | 6  |
| <i>circBPTF</i> | miR-6890-5p               | 1  |
| <i>circBPTF</i> | miR-6894-3p               | 2  |
| <i>circBPTF</i> | miR-7108-5p               | 8  |
| <i>circBPTF</i> | miR-7109-5p               | 1  |
| <i>circBPTF</i> | miR-7113-5p               | 1  |
| <i>circBPTF</i> | miR-7150                  | 4  |
| <i>circBPTF</i> | miR-7152-5p               | 1  |
| <i>circBPTF</i> | miR-7162-3p               | 2  |
| <i>circBPTF</i> | miR-744-3p                | 2  |
| <i>circBPTF</i> | miR-758-3p                | 6  |
| <i>circBPTF</i> | miR-762/4492/4498/5001-5p | 13 |
| <i>circBPTF</i> | miR-766-3p                | 1  |
| <i>circBPTF</i> | miR-7850-5p               | 4  |
| <i>circBPTF</i> | miR-7852-3p               | 1  |
| <i>circBPTF</i> | miR-7974                  | 1  |
| <i>circBPTF</i> | miR-7975                  | 1  |
| <i>circBPTF</i> | miR-7976                  | 1  |
| <i>circBPTF</i> | miR-7978                  | 5  |
| <i>circBPTF</i> | miR-8069                  | 1  |
| <i>circBPTF</i> | miR-8070                  | 3  |
| <i>circBPTF</i> | miR-8083                  | 1  |
| <i>circBPTF</i> | miR-873-5p.1              | 1  |
| <i>circBPTF</i> | miR-873-5p.2              | 1  |
| <i>circBPTF</i> | miR-885-3p                | 1  |
| <i>circBPTF</i> | miR-891a-3p               | 5  |
| <i>circBPTF</i> | miR-921                   | 1  |
| <i>circBPTF</i> | miR-93-3p                 | 6  |
| <i>circBPTF</i> | miR-935                   | 1  |
| <i>circBPTF</i> | miR-939-3p                | 4  |
| <i>circBPTF</i> | miR-943                   | 11 |
| <i>circBPTF</i> | miR-101-3p.1              | 1  |
| <i>circBPTF</i> | miR-1179                  | 1  |

|                 |                          |    |
|-----------------|--------------------------|----|
| <i>circBPTF</i> | miR-1180-5p              | 4  |
| <i>circBPTF</i> | miR-1200                 | 1  |
| <i>circBPTF</i> | miR-1207-5p/4763-3p      | 4  |
| <i>circBPTF</i> | miR-1224-5p              | 1  |
| <i>circBPTF</i> | miR-1227-5p              | 17 |
| <i>circBPTF</i> | miR-1228-3p              | 1  |
| <i>circBPTF</i> | miR-1236-3p              | 4  |
| <i>circBPTF</i> | miR-1249-5p/6797-5p      | 1  |
| <i>circBPTF</i> | miR-125-5p               | 1  |
| <i>circBPTF</i> | miR-1251-3p              | 1  |
| <i>circBPTF</i> | miR-1255a/1255b-5p       | 7  |
| <i>circBPTF</i> | miR-1255b-2-3p           | 1  |
| <i>circBPTF</i> | miR-1256                 | 1  |
| <i>circBPTF</i> | miR-1261                 | 1  |
| <i>circBPTF</i> | miR-1262/4701-3p/6736-5p | 3  |
| <i>circBPTF</i> | miR-1266-3p              | 2  |
| <i>circBPTF</i> | miR-1269                 | 4  |
| <i>circBPTF</i> | miR-1273h-3p             | 1  |
| <i>circBPTF</i> | miR-1276                 | 1  |
| <i>circBPTF</i> | miR-1277-5p              | 1  |
| <i>circBPTF</i> | miR-1288-3p              | 4  |
| <i>circBPTF</i> | miR-1288-5p              | 1  |
| <i>circBPTF</i> | miR-1289                 | 2  |
| <i>circBPTF</i> | miR-129-5p               | 1  |
| <i>circBPTF</i> | miR-1293/4483            | 3  |
| <i>circBPTF</i> | miR-1294                 | 3  |
| <i>circBPTF</i> | miR-1298-3p              | 5  |
| <i>circBPTF</i> | miR-1298-5p              | 1  |
| <i>circBPTF</i> | miR-1301-3p              | 1  |
| <i>circBPTF</i> | miR-1304-5p              | 3  |
| <i>circBPTF</i> | miR-1306-3p              | 3  |
| <i>circBPTF</i> | miR-1306-5p              | 1  |
| <i>circBPTF</i> | miR-1307-3p              | 1  |
| <i>circBPTF</i> | miR-130b-5p              | 5  |
| <i>circBPTF</i> | miR-132-3p/212-3p        | 4  |
| <i>circBPTF</i> | miR-1324                 | 1  |
| <i>circBPTF</i> | miR-140-3p.2             | 1  |
| <i>circBPTF</i> | miR-144-3p               | 1  |

|                 |                     |   |
|-----------------|---------------------|---|
| <i>circBPTF</i> | miR-146-5p          | 1 |
| <i>circBPTF</i> | miR-1468-5p         | 1 |
| <i>circBPTF</i> | miR-147b            | 3 |
| <i>circBPTF</i> | miR-181-5p          | 1 |
| <i>circBPTF</i> | miR-1827            | 1 |
| <i>circBPTF</i> | miR-184             | 1 |
| <i>circBPTF</i> | miR-188-5p          | 1 |
| <i>circBPTF</i> | miR-1909-3p/6722-3p | 4 |
| <i>circBPTF</i> | miR-1909-5p         | 1 |
| <i>circBPTF</i> | miR-193a-5p         | 3 |
| <i>circBPTF</i> | miR-193b-5p         | 8 |
| <i>circBPTF</i> | miR-196b-3p         | 1 |
| <i>circBPTF</i> | miR-197-3p          | 1 |
| <i>circBPTF</i> | miR-198             | 4 |
| <i>circBPTF</i> | miR-200ab-5p        | 1 |
| <i>circBPTF</i> | miR-202-3p          | 1 |
| <i>circBPTF</i> | miR-203b-3p         | 6 |
| <i>circBPTF</i> | miR-204-3p/4646-5p  | 3 |
| <i>circBPTF</i> | miR-205-3p          | 1 |
| <i>circBPTF</i> | miR-20a-3p          | 4 |
| <i>circBPTF</i> | miR-21-5p/590-5p    | 1 |
| <i>circBPTF</i> | miR-210-3p          | 3 |
| <i>circBPTF</i> | miR-2113            | 1 |
| <i>circBPTF</i> | miR-2115-5p         | 1 |
| <i>circBPTF</i> | miR-212-5p          | 6 |
| <i>circBPTF</i> | miR-217             | 1 |
| <i>circBPTF</i> | miR-219-5p          | 3 |
| <i>circBPTF</i> | miR-219a-1-3p       | 5 |
| <i>circBPTF</i> | miR-22-3p           | 1 |
| <i>circBPTF</i> | miR-223-5p          | 1 |
| <i>circBPTF</i> | miR-2276-3p         | 3 |
| <i>circBPTF</i> | miR-2277-3p         | 1 |
| <i>circBPTF</i> | miR-2278            | 1 |
| <i>circBPTF</i> | miR-2355-3p         | 5 |
| <i>circBPTF</i> | miR-2392            | 3 |
| <i>circBPTF</i> | miR-2467-3p         | 1 |
| <i>circBPTF</i> | miR-2467-5p         | 3 |
| <i>circBPTF</i> | miR-27a-5p          | 7 |

|                 |                       |    |
|-----------------|-----------------------|----|
| <i>circBPTF</i> | miR-296-3p            | 4  |
| <i>circBPTF</i> | miR-297               | 3  |
| <i>circBPTF</i> | miR-29a-5p            | 3  |
| <i>circBPTF</i> | miR-30-3p             | 2  |
| <i>circBPTF</i> | miR-301a-5p/301b-5p   | 1  |
| <i>circBPTF</i> | miR-302c-3p.2/520-3p  | 1  |
| <i>circBPTF</i> | miR-3065-3p           | 1  |
| <i>circBPTF</i> | miR-3120-3p           | 3  |
| <i>circBPTF</i> | miR-3121-5p           | 4  |
| <i>circBPTF</i> | miR-3122/3913-5p      | 6  |
| <i>circBPTF</i> | miR-3123              | 1  |
| <i>circBPTF</i> | miR-3126-3p           | 5  |
| <i>circBPTF</i> | miR-3130-3p           | 3  |
| <i>circBPTF</i> | miR-3144-5p           | 4  |
| <i>circBPTF</i> | miR-3151-3p           | 1  |
| <i>circBPTF</i> | miR-3154              | 3  |
| <i>circBPTF</i> | miR-3160-3p           | 13 |
| <i>circBPTF</i> | miR-3170/6855-5p      | 6  |
| <i>circBPTF</i> | miR-3171              | 7  |
| <i>circBPTF</i> | miR-3179              | 3  |
| <i>circBPTF</i> | miR-3188              | 3  |
| <i>circBPTF</i> | miR-3189-3p           | 6  |
| <i>circBPTF</i> | miR-3191-3p           | 4  |
| <i>circBPTF</i> | miR-3192-5p           | 3  |
| <i>circBPTF</i> | miR-3194-3p           | 1  |
| <i>circBPTF</i> | miR-3199/8052         | 4  |
| <i>circBPTF</i> | miR-32-3p             | 1  |
| <i>circBPTF</i> | miR-3202              | 3  |
| <i>circBPTF</i> | miR-323-3p            | 3  |
| <i>circBPTF</i> | miR-329-5p            | 3  |
| <i>circBPTF</i> | miR-331-5p            | 1  |
| <i>circBPTF</i> | miR-342-5p/4664-5p    | 4  |
| <i>circBPTF</i> | miR-346               | 1  |
| <i>circBPTF</i> | miR-3591-5p           | 1  |
| <i>circBPTF</i> | miR-3610              | 3  |
| <i>circBPTF</i> | miR-3614-5p           | 4  |
| <i>circBPTF</i> | miR-362-5p/500b-5p    | 1  |
| <i>circBPTF</i> | miR-3622a-3p/3622b-3p | 5  |

|                 |                     |    |
|-----------------|---------------------|----|
| <i>circBPTF</i> | miR-3622a-5p        | 1  |
| <i>circBPTF</i> | miR-363-5p/6745     | 3  |
| <i>circBPTF</i> | miR-3650            | 1  |
| <i>circBPTF</i> | miR-3655            | 1  |
| <i>circBPTF</i> | miR-365a-5p/365b-5p | 4  |
| <i>circBPTF</i> | miR-3660/4526       | 1  |
| <i>circBPTF</i> | miR-3664-5p         | 4  |
| <i>circBPTF</i> | miR-3672/6864-3p    | 3  |
| <i>circBPTF</i> | miR-3678-3p         | 1  |
| <i>circBPTF</i> | miR-3682-5p         | 1  |
| <i>circBPTF</i> | miR-3690            | 1  |
| <i>circBPTF</i> | miR-376b-5p/376c-5p | 1  |
| <i>circBPTF</i> | miR-377-5p/6086     | 3  |
| <i>circBPTF</i> | miR-378-3p          | 5  |
| <i>circBPTF</i> | miR-378a-5p         | 1  |
| <i>circBPTF</i> | miR-380-5p/563      | 3  |
| <i>circBPTF</i> | miR-382-3p          | 1  |
| <i>circBPTF</i> | miR-383-3p          | 1  |
| <i>circBPTF</i> | miR-3908            | 1  |
| <i>circBPTF</i> | miR-3912-5p         | 4  |
| <i>circBPTF</i> | miR-3915            | 1  |
| <i>circBPTF</i> | miR-3921/4653-5p    | 1  |
| <i>circBPTF</i> | miR-3925-5p         | 1  |
| <i>circBPTF</i> | miR-3928-5p/6806-3p | 1  |
| <i>circBPTF</i> | miR-3929/4419b/4478 | 13 |
| <i>circBPTF</i> | miR-3940-5p/4507    | 7  |
| <i>circBPTF</i> | miR-3942-3p         | 3  |
| <i>circBPTF</i> | miR-3942-5p         | 1  |
| <i>circBPTF</i> | miR-3975            | 3  |
| <i>circBPTF</i> | miR-3977            | 4  |
| <i>circBPTF</i> | miR-409-3p          | 1  |
| <i>circBPTF</i> | miR-409-5p          | 1  |
| <i>circBPTF</i> | miR-411-3p          | 3  |
| <i>circBPTF</i> | miR-412-3p/6754-3p  | 1  |
| <i>circBPTF</i> | miR-4251            | 4  |
| <i>circBPTF</i> | miR-4254            | 1  |
| <i>circBPTF</i> | miR-4259            | 3  |
| <i>circBPTF</i> | miR-4274            | 4  |



|                 |                    |    |
|-----------------|--------------------|----|
| <i>circBPTF</i> | miR-4283           | 16 |
| <i>circBPTF</i> | miR-4294           | 2  |
| <i>circBPTF</i> | miR-431-5p         | 4  |
| <i>circBPTF</i> | miR-4310/7157-5p   | 1  |
| <i>circBPTF</i> | miR-4311           | 1  |
| <i>circBPTF</i> | miR-4314           | 4  |
| <i>circBPTF</i> | miR-4316           | 3  |
| <i>circBPTF</i> | miR-4318           | 9  |
| <i>circBPTF</i> | miR-432-3p         | 3  |
| <i>circBPTF</i> | miR-432-5p         | 7  |
| <i>circBPTF</i> | miR-4325           | 2  |
| <i>circBPTF</i> | miR-4327           | 1  |
| <i>circBPTF</i> | miR-4329           | 4  |
| <i>circBPTF</i> | miR-4432           | 1  |
| <i>circBPTF</i> | miR-4433a-3p       | 7  |
| <i>circBPTF</i> | miR-4433b-3p       | 1  |
| <i>circBPTF</i> | miR-4443           | 1  |
| <i>circBPTF</i> | miR-4444           | 3  |
| <i>circBPTF</i> | miR-4445-5p        | 3  |
| <i>circBPTF</i> | miR-4450           | 1  |
| <i>circBPTF</i> | miR-4453/4538      | 1  |
| <i>circBPTF</i> | miR-4455           | 1  |
| <i>circBPTF</i> | miR-4459           | 7  |
| <i>circBPTF</i> | miR-4462           | 3  |
| <i>circBPTF</i> | miR-4463           | 7  |
| <i>circBPTF</i> | miR-4468           | 5  |
| <i>circBPTF</i> | miR-4474-5p        | 3  |
| <i>circBPTF</i> | miR-4475           | 3  |
| <i>circBPTF</i> | miR-4482-3p        | 2  |
| <i>circBPTF</i> | miR-4487           | 13 |
| <i>circBPTF</i> | miR-4489           | 16 |
| <i>circBPTF</i> | miR-4493           | 4  |
| <i>circBPTF</i> | miR-4499           | 7  |
| <i>circBPTF</i> | miR-4502           | 1  |
| <i>circBPTF</i> | miR-4504           | 4  |
| <i>circBPTF</i> | miR-450a-1-3p      | 6  |
| <i>circBPTF</i> | miR-450b-3p/769-3p | 9  |
| <i>circBPTF</i> | miR-4513/6855-3p   | 4  |

|                 |                          |    |
|-----------------|--------------------------|----|
| <i>circBPTF</i> | miR-4515                 | 4  |
| <i>circBPTF</i> | miR-4519                 | 4  |
| <i>circBPTF</i> | miR-4520-2-3p            | 6  |
| <i>circBPTF</i> | miR-4520-3p              | 6  |
| <i>circBPTF</i> | miR-4524a-3p             | 3  |
| <i>circBPTF</i> | miR-4524b-3p             | 3  |
| <i>circBPTF</i> | miR-4527/6503-5p         | 3  |
| <i>circBPTF</i> | miR-4528                 | 1  |
| <i>circBPTF</i> | miR-4529-3p              | 6  |
| <i>circBPTF</i> | miR-4533                 | 3  |
| <i>circBPTF</i> | miR-4535                 | 4  |
| <i>circBPTF</i> | miR-4539                 | 10 |
| <i>circBPTF</i> | miR-4638-3p              | 5  |
| <i>circBPTF</i> | miR-4638-5p              | 1  |
| <i>circBPTF</i> | miR-4639-3p              | 1  |
| <i>circBPTF</i> | miR-4642                 | 1  |
| <i>circBPTF</i> | miR-4645-3p              | 7  |
| <i>circBPTF</i> | miR-4646-3p              | 5  |
| <i>circBPTF</i> | miR-4652-5p              | 4  |
| <i>circBPTF</i> | miR-4653-3p              | 4  |
| <i>circBPTF</i> | miR-4659a-3p/4659b-3p    | 3  |
| <i>circBPTF</i> | miR-4661-3p              | 1  |
| <i>circBPTF</i> | miR-4663                 | 20 |
| <i>circBPTF</i> | miR-4667-5p/4700-5p/8089 | 18 |
| <i>circBPTF</i> | miR-4681                 | 1  |
| <i>circBPTF</i> | miR-4682                 | 4  |
| <i>circBPTF</i> | miR-4689/6858-5p         | 1  |
| <i>circBPTF</i> | miR-4695-3p              | 1  |
| <i>circBPTF</i> | miR-4698                 | 1  |
| <i>circBPTF</i> | miR-4700-3p              | 3  |
| <i>circBPTF</i> | miR-4703-3p              | 1  |
| <i>circBPTF</i> | miR-4709-3p              | 5  |
| <i>circBPTF</i> | miR-4710                 | 1  |
| <i>circBPTF</i> | miR-4714-3p              | 1  |
| <i>circBPTF</i> | miR-4714-5p              | 4  |
| <i>circBPTF</i> | miR-4715-5p              | 3  |
| <i>circBPTF</i> | miR-4727-5p              | 4  |
| <i>circBPTF</i> | miR-4731-5p              | 16 |

|                 |                     |   |
|-----------------|---------------------|---|
| <i>circBPTF</i> | miR-4732-3p         | 1 |
| <i>circBPTF</i> | miR-4736            | 4 |
| <i>circBPTF</i> | miR-4740-5p         | 4 |
| <i>circBPTF</i> | miR-4742-3p         | 2 |
| <i>circBPTF</i> | miR-4751            | 1 |
| <i>circBPTF</i> | miR-4753-3p         | 6 |
| <i>circBPTF</i> | miR-4762-3p         | 2 |
| <i>circBPTF</i> | miR-4763-5p         | 1 |
| <i>circBPTF</i> | miR-4768-3p         | 7 |
| <i>circBPTF</i> | miR-4768-5p/6833-3p | 4 |
| <i>circBPTF</i> | miR-4772-3p         | 3 |
| <i>circBPTF</i> | miR-4776-5p         | 4 |
| <i>circBPTF</i> | miR-4778-3p         | 3 |
| <i>circBPTF</i> | miR-4778-5p         | 2 |
| <i>circBPTF</i> | miR-4781-3p         | 1 |
| <i>circBPTF</i> | miR-4792            | 1 |
| <i>circBPTF</i> | miR-4793-3p         | 3 |
| <i>circBPTF</i> | miR-4802-3p         | 3 |
| <i>circBPTF</i> | miR-4802-5p         | 3 |
| <i>circBPTF</i> | miR-4804-5p         | 3 |
| <i>circBPTF</i> | miR-484/3155        | 6 |
| <i>circBPTF</i> | miR-485-5p          | 3 |
| <i>circBPTF</i> | miR-486-3p          | 1 |
| <i>circBPTF</i> | miR-487a-5p/487b-5p | 1 |
| <i>circBPTF</i> | miR-490-3p          | 5 |
| <i>circBPTF</i> | miR-491-3p          | 1 |
| <i>circBPTF</i> | miR-493-3p          | 3 |
| <i>circBPTF</i> | miR-494-3p          | 4 |
| <i>circBPTF</i> | miR-5001-3p         | 4 |
| <i>circBPTF</i> | miR-5003-5p         | 1 |
| <i>circBPTF</i> | miR-5004-3p         | 4 |
| <i>circBPTF</i> | miR-5004-5p         | 1 |
| <i>circBPTF</i> | miR-5009-5p/8058    | 4 |
| <i>circBPTF</i> | miR-501-5p          | 1 |
| <i>circBPTF</i> | miR-5010-3p         | 1 |
| <i>circBPTF</i> | miR-508-3p          | 3 |
| <i>circBPTF</i> | miR-5089-3p         | 1 |
| <i>circBPTF</i> | miR-5089-5p         | 9 |

|                 |                              |    |
|-----------------|------------------------------|----|
| <i>circBPTF</i> | miR-509-3-5p/509-5p/4418     | 1  |
| <i>circBPTF</i> | miR-5096                     | 1  |
| <i>circBPTF</i> | miR-511-5p                   | 4  |
| <i>circBPTF</i> | miR-512-3p                   | 1  |
| <i>circBPTF</i> | miR-514a-5p                  | 4  |
| <i>circBPTF</i> | miR-516a-3p/516b-3p/7162-5p  | 1  |
| <i>circBPTF</i> | miR-5187-5p                  | 8  |
| <i>circBPTF</i> | miR-5191                     | 1  |
| <i>circBPTF</i> | miR-526b-5p                  | 4  |
| <i>circBPTF</i> | miR-542-3p                   | 4  |
| <i>circBPTF</i> | miR-545-5p                   | 1  |
| <i>circBPTF</i> | miR-548ai/548ag/548ba/570-5p | 3  |
| <i>circBPTF</i> | miR-556-3p                   | 1  |
| <i>circBPTF</i> | miR-558                      | 13 |
| <i>circBPTF</i> | miR-5582-5p                  | 1  |
| <i>circBPTF</i> | miR-5589-5p                  | 16 |
| <i>circBPTF</i> | miR-567                      | 3  |
| <i>circBPTF</i> | miR-5691                     | 5  |
| <i>circBPTF</i> | miR-5702                     | 2  |
| <i>circBPTF</i> | miR-571                      | 5  |
| <i>circBPTF</i> | miR-583                      | 1  |
| <i>circBPTF</i> | miR-589-5p                   | 1  |
| <i>circBPTF</i> | miR-600                      | 1  |
| <i>circBPTF</i> | miR-604                      | 2  |
| <i>circBPTF</i> | miR-605-3p                   | 4  |
| <i>circBPTF</i> | miR-608/4651                 | 4  |
| <i>circBPTF</i> | miR-609                      | 1  |
| <i>circBPTF</i> | miR-6126                     | 4  |
| <i>circBPTF</i> | miR-6132/6836-5p             | 4  |
| <i>circBPTF</i> | miR-619-3p                   | 6  |
| <i>circBPTF</i> | miR-619-5p/6506-5p           | 3  |
| <i>circBPTF</i> | miR-622                      | 4  |
| <i>circBPTF</i> | miR-627-5p                   | 4  |
| <i>circBPTF</i> | miR-629-5p                   | 8  |
| <i>circBPTF</i> | miR-630                      | 3  |
| <i>circBPTF</i> | miR-635/6774-5p              | 7  |
| <i>circBPTF</i> | miR-636                      | 4  |
| <i>circBPTF</i> | miR-637                      | 18 |

|                 |                             |   |
|-----------------|-----------------------------|---|
| <i>circBPTF</i> | miR-640                     | 1 |
| <i>circBPTF</i> | miR-649                     | 5 |
| <i>circBPTF</i> | miR-6500-3p                 | 4 |
| <i>circBPTF</i> | miR-6504-3p                 | 1 |
| <i>circBPTF</i> | miR-6513-5p                 | 6 |
| <i>circBPTF</i> | miR-6514-5p                 | 3 |
| <i>circBPTF</i> | miR-6515-3p                 | 4 |
| <i>circBPTF</i> | miR-6515-5p                 | 1 |
| <i>circBPTF</i> | miR-653-5p                  | 4 |
| <i>circBPTF</i> | miR-654-5p                  | 3 |
| <i>circBPTF</i> | miR-655-5p                  | 3 |
| <i>circBPTF</i> | miR-670-5p                  | 1 |
| <i>circBPTF</i> | miR-6719-3p                 | 1 |
| <i>circBPTF</i> | miR-6728-3p                 | 4 |
| <i>circBPTF</i> | miR-6728-5p                 | 9 |
| <i>circBPTF</i> | miR-6730-3p                 | 1 |
| <i>circBPTF</i> | miR-6732-3p                 | 1 |
| <i>circBPTF</i> | miR-6737-5p/6812-5p/6819-5p | 6 |
| <i>circBPTF</i> | miR-6739-3p                 | 3 |
| <i>circBPTF</i> | miR-6741-3p                 | 1 |
| <i>circBPTF</i> | miR-6741-5p                 | 3 |
| <i>circBPTF</i> | miR-6744-5p                 | 7 |
| <i>circBPTF</i> | miR-6747-5p                 | 4 |
| <i>circBPTF</i> | miR-6748-5p                 | 6 |
| <i>circBPTF</i> | miR-675-3p                  | 3 |
| <i>circBPTF</i> | miR-6753-3p/7107-3p         | 3 |
| <i>circBPTF</i> | miR-6755-3p                 | 3 |
| <i>circBPTF</i> | miR-6756-5p/6766-5p         | 3 |
| <i>circBPTF</i> | miR-6757-3p                 | 1 |
| <i>circBPTF</i> | miR-6758-5p/6856-5p         | 1 |
| <i>circBPTF</i> | miR-676-5p                  | 2 |
| <i>circBPTF</i> | miR-6761-5p                 | 4 |
| <i>circBPTF</i> | miR-6762-3p                 | 2 |
| <i>circBPTF</i> | miR-6765-3p                 | 5 |
| <i>circBPTF</i> | miR-6769a-5p/6769b-5p       | 3 |
| <i>circBPTF</i> | miR-6772-3p                 | 1 |
| <i>circBPTF</i> | miR-6772-5p                 | 1 |
| <i>circBPTF</i> | miR-6776-3p                 | 1 |

|                 |             |    |
|-----------------|-------------|----|
| <i>circBPTF</i> | miR-6776-5p | 4  |
| <i>circBPTF</i> | miR-6793-5p | 6  |
| <i>circBPTF</i> | miR-6804-5p | 1  |
| <i>circBPTF</i> | miR-6809-3p | 4  |
| <i>circBPTF</i> | miR-6817-3p | 2  |
| <i>circBPTF</i> | miR-6821-5p | 3  |
| <i>circBPTF</i> | miR-6822-3p | 1  |
| <i>circBPTF</i> | miR-6823-5p | 4  |
| <i>circBPTF</i> | miR-6827-5p | 3  |
| <i>circBPTF</i> | miR-6832-3p | 1  |
| <i>circBPTF</i> | miR-6837-3p | 1  |
| <i>circBPTF</i> | miR-6839-3p | 7  |
| <i>circBPTF</i> | miR-6844    | 2  |
| <i>circBPTF</i> | miR-6853-5p | 3  |
| <i>circBPTF</i> | miR-6857-3p | 4  |
| <i>circBPTF</i> | miR-6861-5p | 4  |
| <i>circBPTF</i> | miR-6864-5p | 4  |
| <i>circBPTF</i> | miR-6867-5p | 1  |
| <i>circBPTF</i> | miR-6871-5p | 3  |
| <i>circBPTF</i> | miR-6875-3p | 3  |
| <i>circBPTF</i> | miR-6882-3p | 2  |
| <i>circBPTF</i> | miR-6888-5p | 6  |
| <i>circBPTF</i> | miR-6890-3p | 1  |
| <i>circBPTF</i> | miR-711     | 4  |
| <i>circBPTF</i> | miR-7110-3p | 2  |
| <i>circBPTF</i> | miR-7114-5p | 8  |
| <i>circBPTF</i> | miR-7155-5p | 18 |
| <i>circBPTF</i> | miR-7156-3p | 1  |
| <i>circBPTF</i> | miR-7158-3p | 6  |
| <i>circBPTF</i> | miR-7159-3p | 2  |
| <i>circBPTF</i> | miR-7160-5p | 20 |
| <i>circBPTF</i> | miR-7515    | 3  |
| <i>circBPTF</i> | miR-758-5p  | 3  |
| <i>circBPTF</i> | miR-760     | 1  |
| <i>circBPTF</i> | miR-764     | 1  |
| <i>circBPTF</i> | miR-767-3p  | 3  |
| <i>circBPTF</i> | miR-7703    | 2  |
| <i>circBPTF</i> | miR-7845-5p | 3  |

|                     |                       |    |
|---------------------|-----------------------|----|
| <i>circBPTF</i>     | miR-7851-3p           | 6  |
| <i>circBPTF</i>     | miR-7855-5p           | 1  |
| <i>circBPTF</i>     | miR-802               | 1  |
| <i>circBPTF</i>     | miR-8055              | 4  |
| <i>circBPTF</i>     | miR-8063              | 1  |
| <i>circBPTF</i>     | miR-8064              | 2  |
| <i>circBPTF</i>     | miR-8068              | 1  |
| <i>circBPTF</i>     | miR-8075              | 1  |
| <i>circBPTF</i>     | miR-8077              | 20 |
| <i>circBPTF</i>     | miR-8081              | 1  |
| <i>circBPTF</i>     | miR-8087              | 1  |
| <i>circBPTF</i>     | miR-873-3p            | 6  |
| <i>circBPTF</i>     | miR-887-5p            | 6  |
| <i>circBPTF</i>     | miR-890               | 4  |
| <i>circBPTF</i>     | miR-891b              | 4  |
| <i>circBPTF</i>     | miR-892a              | 9  |
| <i>circBPTF</i>     | miR-9-5p              | 3  |
| <i>circBPTF</i>     | miR-924               | 7  |
| <i>circBPTF</i>     | miR-92a-2-5p          | 3  |
| <i>circBPTF</i>     | miR-937-5p            | 4  |
| <i>circBPTF</i>     | miR-942-5p            | 4  |
| <i>circC16orf62</i> | let-7a-2-3p/let-7g-3p | 1  |
| <i>circC16orf62</i> | let-7c-3p             | 1  |
| <i>circC16orf62</i> | miR-1-3p/206          | 1  |
| <i>circC16orf62</i> | miR-10-5p             | 2  |
| <i>circC16orf62</i> | miR-103a-2-5p         | 1  |
| <i>circC16orf62</i> | miR-105-5p            | 2  |
| <i>circC16orf62</i> | miR-1178-3p           | 1  |
| <i>circC16orf62</i> | miR-1183              | 1  |
| <i>circC16orf62</i> | miR-1184              | 2  |
| <i>circC16orf62</i> | miR-1197              | 2  |
| <i>circC16orf62</i> | miR-1199-5p/6751-3p   | 2  |
| <i>circC16orf62</i> | miR-1200              | 3  |
| <i>circC16orf62</i> | miR-1205              | 2  |
| <i>circC16orf62</i> | miR-1207-3p           | 7  |
| <i>circC16orf62</i> | miR-1208              | 1  |
| <i>circC16orf62</i> | miR-122-5p            | 2  |
| <i>circC16orf62</i> | miR-1224-3p           | 2  |

|                     |                          |   |
|---------------------|--------------------------|---|
| <i>circC16orf62</i> | miR-1225-3p              | 3 |
| <i>circC16orf62</i> | miR-1225-5p              | 2 |
| <i>circC16orf62</i> | miR-1229-3p              | 1 |
| <i>circC16orf62</i> | miR-1229-5p              | 2 |
| <i>circC16orf62</i> | miR-1231                 | 4 |
| <i>circC16orf62</i> | miR-1233-3p              | 4 |
| <i>circC16orf62</i> | miR-1237-3p              | 3 |
| <i>circC16orf62</i> | miR-124-3p.1             | 4 |
| <i>circC16orf62</i> | miR-124-3p.2/506-3p      | 1 |
| <i>circC16orf62</i> | miR-124-5p               | 2 |
| <i>circC16orf62</i> | miR-1243                 | 3 |
| <i>circC16orf62</i> | miR-1247-3p              | 5 |
| <i>circC16orf62</i> | miR-1248                 | 3 |
| <i>circC16orf62</i> | miR-125-5p               | 1 |
| <i>circC16orf62</i> | miR-1251-3p              | 4 |
| <i>circC16orf62</i> | miR-1254/3116            | 2 |
| <i>circC16orf62</i> | miR-1255a/1255b-5p       | 4 |
| <i>circC16orf62</i> | miR-1257                 | 1 |
| <i>circC16orf62</i> | miR-125a-3p              | 4 |
| <i>circC16orf62</i> | miR-1260a/1260b          | 2 |
| <i>circC16orf62</i> | miR-1262/4701-3p/6736-5p | 1 |
| <i>circC16orf62</i> | miR-1264                 | 2 |
| <i>circC16orf62</i> | miR-1265                 | 2 |
| <i>circC16orf62</i> | miR-1266-5p/4518         | 3 |
| <i>circC16orf62</i> | miR-1267                 | 3 |
| <i>circC16orf62</i> | miR-1273d                | 1 |
| <i>circC16orf62</i> | miR-1273e                | 4 |
| <i>circC16orf62</i> | miR-1275/4665-5p         | 2 |
| <i>circC16orf62</i> | miR-1276                 | 1 |
| <i>circC16orf62</i> | miR-128-3p               | 4 |
| <i>circC16orf62</i> | miR-1281                 | 1 |
| <i>circC16orf62</i> | miR-1285-5p              | 1 |
| <i>circC16orf62</i> | miR-1287-5p              | 2 |
| <i>circC16orf62</i> | miR-129-5p               | 5 |
| <i>circC16orf62</i> | miR-1292-3p              | 1 |
| <i>circC16orf62</i> | miR-1292-5p              | 5 |
| <i>circC16orf62</i> | miR-1293/4483            | 2 |
| <i>circC16orf62</i> | miR-1295a                | 2 |



|                     |                                      |   |
|---------------------|--------------------------------------|---|
| <i>circC16orf62</i> | miR-1296-3p                          | 2 |
| <i>circC16orf62</i> | miR-130-3p/301-3p/454-3p             | 2 |
| <i>circC16orf62</i> | miR-1301-3p                          | 1 |
| <i>circC16orf62</i> | miR-1303                             | 3 |
| <i>circC16orf62</i> | miR-1304-3p                          | 2 |
| <i>circC16orf62</i> | miR-1305                             | 2 |
| <i>circC16orf62</i> | miR-1307-3p                          | 1 |
| <i>circC16orf62</i> | miR-130b-5p                          | 3 |
| <i>circC16orf62</i> | miR-133a-3p.2/133b                   | 1 |
| <i>circC16orf62</i> | miR-134-3p                           | 2 |
| <i>circC16orf62</i> | miR-134-5p                           | 1 |
| <i>circC16orf62</i> | miR-1343-3p                          | 2 |
| <i>circC16orf62</i> | miR-135-5p                           | 1 |
| <i>circC16orf62</i> | miR-135b-3p                          | 1 |
| <i>circC16orf62</i> | miR-136-3p                           | 1 |
| <i>circC16orf62</i> | miR-136-5p                           | 3 |
| <i>circC16orf62</i> | miR-138-2-3p                         | 3 |
| <i>circC16orf62</i> | miR-141-3p/200-3p                    | 2 |
| <i>circC16orf62</i> | miR-142-3p.2                         | 1 |
| <i>circC16orf62</i> | miR-143-5p                           | 4 |
| <i>circC16orf62</i> | miR-145-3p                           | 3 |
| <i>circC16orf62</i> | miR-1470                             | 2 |
| <i>circC16orf62</i> | miR-148-3p/152-3p                    | 1 |
| <i>circC16orf62</i> | miR-148a-5p                          | 5 |
| <i>circC16orf62</i> | miR-148b-5p/6874-3p                  | 1 |
| <i>circC16orf62</i> | miR-149-3p/4728-5p/6785-5p/6883-5p   | 5 |
| <i>circC16orf62</i> | miR-149-5p                           | 4 |
| <i>circC16orf62</i> | miR-15-5p/16-5p/195-5p/424-5p/497-5p | 1 |
| <i>circC16orf62</i> | miR-150-5p                           | 5 |
| <i>circC16orf62</i> | miR-153-5p                           | 2 |
| <i>circC16orf62</i> | miR-154-3p/487-3p                    | 1 |
| <i>circC16orf62</i> | miR-154-5p                           | 1 |
| <i>circC16orf62</i> | miR-15a-3p                           | 1 |
| <i>circC16orf62</i> | miR-17-3p                            | 2 |
| <i>circC16orf62</i> | miR-17-5p/20-5p/93-5p/106-5p/519-3p  | 2 |
| <i>circC16orf62</i> | miR-181-3p/4420                      | 2 |
| <i>circC16orf62</i> | miR-181a-3p                          | 1 |
| <i>circC16orf62</i> | miR-181c-3p                          | 1 |

|                     |                      |   |
|---------------------|----------------------|---|
| <i>circC16orf62</i> | miR-181d-3p          | 1 |
| <i>circC16orf62</i> | miR-1825             | 2 |
| <i>circC16orf62</i> | miR-1827             | 1 |
| <i>circC16orf62</i> | miR-183-3p           | 1 |
| <i>circC16orf62</i> | miR-186-5p           | 9 |
| <i>circC16orf62</i> | miR-188-3p           | 2 |
| <i>circC16orf62</i> | miR-18a-3p           | 1 |
| <i>circC16orf62</i> | miR-1909-5p          | 3 |
| <i>circC16orf62</i> | miR-1910-3p/6511a-5p | 2 |
| <i>circC16orf62</i> | miR-1910-5p          | 4 |
| <i>circC16orf62</i> | miR-1911-3p          | 5 |
| <i>circC16orf62</i> | miR-1914-5p          | 2 |
| <i>circC16orf62</i> | miR-1915-3p/6764-5p  | 6 |
| <i>circC16orf62</i> | miR-1915-5p          | 1 |
| <i>circC16orf62</i> | miR-192-3p           | 5 |
| <i>circC16orf62</i> | miR-192-5p/215-5p    | 1 |
| <i>circC16orf62</i> | miR-193a-5p          | 1 |
| <i>circC16orf62</i> | miR-193b-5p          | 2 |
| <i>circC16orf62</i> | miR-194-3p           | 4 |
| <i>circC16orf62</i> | miR-196-5p           | 1 |
| <i>circC16orf62</i> | miR-197-3p           | 2 |
| <i>circC16orf62</i> | miR-197-5p/3132      | 2 |
| <i>circC16orf62</i> | miR-1976             | 3 |
| <i>circC16orf62</i> | miR-198              | 1 |
| <i>circC16orf62</i> | miR-199-5p           | 2 |
| <i>circC16orf62</i> | miR-202-5p           | 2 |
| <i>circC16orf62</i> | miR-204-3p/4646-5p   | 4 |
| <i>circC16orf62</i> | miR-205-5p           | 8 |
| <i>circC16orf62</i> | miR-208-3p           | 1 |
| <i>circC16orf62</i> | miR-208-5p           | 4 |
| <i>circC16orf62</i> | miR-20a-3p           | 1 |
| <i>circC16orf62</i> | miR-210-5p           | 2 |
| <i>circC16orf62</i> | miR-211-3p           | 2 |
| <i>circC16orf62</i> | miR-2113             | 1 |
| <i>circC16orf62</i> | miR-2114-3p          | 3 |
| <i>circC16orf62</i> | miR-2114-5p          | 3 |
| <i>circC16orf62</i> | miR-2115-5p          | 1 |
| <i>circC16orf62</i> | miR-2116-3p          | 5 |

|                     |                                              |   |
|---------------------|----------------------------------------------|---|
| <i>circC16orf62</i> | miR-212-5p                                   | 6 |
| <i>circC16orf62</i> | miR-216b-3p                                  | 1 |
| <i>circC16orf62</i> | miR-217                                      | 3 |
| <i>circC16orf62</i> | miR-218-5p                                   | 4 |
| <i>circC16orf62</i> | miR-219a-1-3p                                | 1 |
| <i>circC16orf62</i> | miR-22-3p                                    | 2 |
| <i>circC16orf62</i> | miR-221-5p/8073                              | 2 |
| <i>circC16orf62</i> | miR-223-5p                                   | 2 |
| <i>circC16orf62</i> | miR-224-5p                                   | 3 |
| <i>circC16orf62</i> | miR-2276-3p                                  | 1 |
| <i>circC16orf62</i> | miR-2392                                     | 3 |
| <i>circC16orf62</i> | miR-24-3p                                    | 3 |
| <i>circC16orf62</i> | miR-24-5p                                    | 1 |
| <i>circC16orf62</i> | miR-26-5p                                    | 7 |
| <i>circC16orf62</i> | miR-2681-3p                                  | 2 |
| <i>circC16orf62</i> | miR-2681-5p                                  | 1 |
| <i>circC16orf62</i> | miR-27-3p                                    | 5 |
| <i>circC16orf62</i> | miR-28-3p                                    | 1 |
| <i>circC16orf62</i> | miR-2909                                     | 1 |
| <i>circC16orf62</i> | miR-296-3p                                   | 1 |
| <i>circC16orf62</i> | miR-299-3p                                   | 3 |
| <i>circC16orf62</i> | miR-299-5p                                   | 1 |
| <i>circC16orf62</i> | miR-29b-1-5p                                 | 1 |
| <i>circC16orf62</i> | miR-29b-2-5p                                 | 1 |
| <i>circC16orf62</i> | miR-30-3p                                    | 1 |
| <i>circC16orf62</i> | miR-301a-5p/301b-5p                          | 3 |
| <i>circC16orf62</i> | miR-302-3p/372-3p/373-3p/520-3p              | 2 |
| <i>circC16orf62</i> | miR-302c-3p.2/520-3p                         | 2 |
| <i>circC16orf62</i> | miR-3064-3p                                  | 3 |
| <i>circC16orf62</i> | miR-3074-5p                                  | 3 |
| <i>circC16orf62</i> | miR-30b-3p/1273h-5p/3689-3p/6779-5p/6780a-5p | 6 |
| <i>circC16orf62</i> | miR-30c-3p/6788-5p                           | 6 |
| <i>circC16orf62</i> | miR-3119                                     | 2 |
| <i>circC16orf62</i> | miR-3122/3913-5p                             | 5 |
| <i>circC16orf62</i> | miR-3127-5p                                  | 3 |
| <i>circC16orf62</i> | miR-3130-3p                                  | 2 |
| <i>circC16orf62</i> | miR-3133                                     | 9 |
| <i>circC16orf62</i> | miR-3135b                                    | 2 |

|                     |                       |   |
|---------------------|-----------------------|---|
| <i>circC16orf62</i> | miR-3136-3p/7155-3p   | 4 |
| <i>circC16orf62</i> | miR-3136-5p/4439      | 1 |
| <i>circC16orf62</i> | miR-3140-3p           | 2 |
| <i>circC16orf62</i> | miR-3140-5p           | 1 |
| <i>circC16orf62</i> | miR-3147              | 1 |
| <i>circC16orf62</i> | miR-3149              | 2 |
| <i>circC16orf62</i> | miR-3150a-5p/3150b-5p | 2 |
| <i>circC16orf62</i> | miR-3151-5p           | 2 |
| <i>circC16orf62</i> | miR-3152-5p           | 2 |
| <i>circC16orf62</i> | miR-3156-3p           | 2 |
| <i>circC16orf62</i> | miR-3157-5p           | 6 |
| <i>circC16orf62</i> | miR-3158-5p           | 2 |
| <i>circC16orf62</i> | miR-3161              | 2 |
| <i>circC16orf62</i> | miR-3162-5p           | 1 |
| <i>circC16orf62</i> | miR-3163              | 4 |
| <i>circC16orf62</i> | miR-3164              | 1 |
| <i>circC16orf62</i> | miR-3168              | 1 |
| <i>circC16orf62</i> | miR-3170/6855-5p      | 1 |
| <i>circC16orf62</i> | miR-3176/3922-3p      | 1 |
| <i>circC16orf62</i> | miR-3177-5p           | 1 |
| <i>circC16orf62</i> | miR-3184-3p           | 2 |
| <i>circC16orf62</i> | miR-3186-5p           | 1 |
| <i>circC16orf62</i> | miR-3187-3p           | 1 |
| <i>circC16orf62</i> | miR-3189-3p           | 6 |
| <i>circC16orf62</i> | miR-3190-3p           | 1 |
| <i>circC16orf62</i> | miR-3190-5p           | 1 |
| <i>circC16orf62</i> | miR-3191-5p           | 3 |
| <i>circC16orf62</i> | miR-3192-5p           | 4 |
| <i>circC16orf62</i> | miR-3193              | 6 |
| <i>circC16orf62</i> | miR-3194-3p           | 2 |
| <i>circC16orf62</i> | miR-3194-5p           | 2 |
| <i>circC16orf62</i> | miR-3198/4309         | 4 |
| <i>circC16orf62</i> | miR-320e              | 1 |
| <i>circC16orf62</i> | miR-323b-3p           | 1 |
| <i>circC16orf62</i> | miR-324-3p/1913       | 1 |
| <i>circC16orf62</i> | miR-324-5p            | 5 |
| <i>circC16orf62</i> | miR-329-5p            | 1 |
| <i>circC16orf62</i> | miR-33-5p             | 2 |

|                     |                    |   |
|---------------------|--------------------|---|
| <i>circC16orf62</i> | miR-330-3p         | 2 |
| <i>circC16orf62</i> | miR-330-3p.2       | 2 |
| <i>circC16orf62</i> | miR-331-3p         | 2 |
| <i>circC16orf62</i> | miR-335-3p         | 4 |
| <i>circC16orf62</i> | miR-335-5p         | 1 |
| <i>circC16orf62</i> | miR-34-5p/449-5p   | 4 |
| <i>circC16orf62</i> | miR-342-3p         | 1 |
| <i>circC16orf62</i> | miR-342-5p/4664-5p | 1 |
| <i>circC16orf62</i> | miR-345-3p         | 1 |
| <i>circC16orf62</i> | miR-34b-3p         | 1 |
| <i>circC16orf62</i> | miR-34b-5p/449c-5p | 2 |
| <i>circC16orf62</i> | miR-34c-3p         | 1 |
| <i>circC16orf62</i> | miR-3529-3p        | 1 |
| <i>circC16orf62</i> | miR-3591-5p        | 1 |
| <i>circC16orf62</i> | miR-361-3p         | 1 |
| <i>circC16orf62</i> | miR-3612           | 1 |
| <i>circC16orf62</i> | miR-3613-3p        | 4 |
| <i>circC16orf62</i> | miR-3614-3p        | 3 |
| <i>circC16orf62</i> | miR-362-5p/500b-5p | 5 |
| <i>circC16orf62</i> | miR-3620-3p        | 1 |
| <i>circC16orf62</i> | miR-3622a-5p       | 2 |
| <i>circC16orf62</i> | miR-3622b-5p       | 5 |
| <i>circC16orf62</i> | miR-363-5p/6745    | 2 |
| <i>circC16orf62</i> | miR-3652/4430      | 4 |
| <i>circC16orf62</i> | miR-3653-5p        | 3 |
| <i>circC16orf62</i> | miR-3654           | 3 |
| <i>circC16orf62</i> | miR-3660/4526      | 3 |
| <i>circC16orf62</i> | miR-3663-5p        | 3 |
| <i>circC16orf62</i> | miR-3664-3p        | 3 |
| <i>circC16orf62</i> | miR-3665           | 3 |
| <i>circC16orf62</i> | miR-3667-5p        | 1 |
| <i>circC16orf62</i> | miR-3668           | 1 |
| <i>circC16orf62</i> | miR-367-5p         | 3 |
| <i>circC16orf62</i> | miR-3670           | 5 |
| <i>circC16orf62</i> | miR-3675-5p        | 1 |
| <i>circC16orf62</i> | miR-3677-5p        | 1 |
| <i>circC16orf62</i> | miR-3681-5p        | 2 |
| <i>circC16orf62</i> | miR-3685           | 2 |

|                     |                                   |   |
|---------------------|-----------------------------------|---|
| <i>circC16orf62</i> | miR-3686                          | 2 |
| <i>circC16orf62</i> | miR-3688-5p                       | 4 |
| <i>circC16orf62</i> | miR-3689a-5p/3689b-5p/3689e/3689f | 2 |
| <i>circC16orf62</i> | miR-3689d/6851-5p                 | 4 |
| <i>circC16orf62</i> | miR-3690                          | 3 |
| <i>circC16orf62</i> | miR-3692-5p                       | 5 |
| <i>circC16orf62</i> | miR-370-3p                        | 5 |
| <i>circC16orf62</i> | miR-371-5p                        | 4 |
| <i>circC16orf62</i> | miR-3714                          | 4 |
| <i>circC16orf62</i> | miR-371b-5p/373-5p/616-5p         | 4 |
| <i>circC16orf62</i> | miR-372-5p                        | 4 |
| <i>circC16orf62</i> | miR-376c-3p                       | 1 |
| <i>circC16orf62</i> | miR-377-3p                        | 4 |
| <i>circC16orf62</i> | miR-377-5p/6086                   | 1 |
| <i>circC16orf62</i> | miR-378a-5p                       | 3 |
| <i>circC16orf62</i> | miR-378j/6839-5p                  | 3 |
| <i>circC16orf62</i> | miR-379-5p                        | 2 |
| <i>circC16orf62</i> | miR-380-3p                        | 1 |
| <i>circC16orf62</i> | miR-380-5p/563                    | 5 |
| <i>circC16orf62</i> | miR-382-5p                        | 1 |
| <i>circC16orf62</i> | miR-384                           | 2 |
| <i>circC16orf62</i> | miR-3908                          | 1 |
| <i>circC16orf62</i> | miR-3910                          | 4 |
| <i>circC16orf62</i> | miR-3921/4653-5p                  | 3 |
| <i>circC16orf62</i> | miR-3924                          | 1 |
| <i>circC16orf62</i> | miR-3925-3p                       | 3 |
| <i>circC16orf62</i> | miR-3926                          | 3 |
| <i>circC16orf62</i> | miR-3927-3p/6831-5p               | 1 |
| <i>circC16orf62</i> | miR-3928-5p/6806-3p               | 3 |
| <i>circC16orf62</i> | miR-3929/4419b/4478               | 4 |
| <i>circC16orf62</i> | miR-3934-5p                       | 4 |
| <i>circC16orf62</i> | miR-3937                          | 3 |
| <i>circC16orf62</i> | miR-3940-5p/4507                  | 2 |
| <i>circC16orf62</i> | miR-3942-3p                       | 1 |
| <i>circC16orf62</i> | miR-3942-5p                       | 1 |
| <i>circC16orf62</i> | miR-3944-5p                       | 3 |
| <i>circC16orf62</i> | miR-3973                          | 6 |
| <i>circC16orf62</i> | miR-3974                          | 1 |

|                     |                       |    |
|---------------------|-----------------------|----|
| <i>circC16orf62</i> | miR-3977              | 2  |
| <i>circC16orf62</i> | miR-409-3p            | 1  |
| <i>circC16orf62</i> | miR-410-3p            | 1  |
| <i>circC16orf62</i> | miR-411-3p            | 2  |
| <i>circC16orf62</i> | miR-411-5p.1          | 1  |
| <i>circC16orf62</i> | miR-411-5p.2          | 1  |
| <i>circC16orf62</i> | miR-412-3p/6754-3p    | 3  |
| <i>circC16orf62</i> | miR-421               | 5  |
| <i>circC16orf62</i> | miR-4254              | 3  |
| <i>circC16orf62</i> | miR-4256              | 3  |
| <i>circC16orf62</i> | miR-4258              | 1  |
| <i>circC16orf62</i> | miR-4259              | 2  |
| <i>circC16orf62</i> | miR-4265/4296/4322    | 2  |
| <i>circC16orf62</i> | miR-4267              | 6  |
| <i>circC16orf62</i> | miR-4268              | 13 |
| <i>circC16orf62</i> | miR-4269/6715b-5p     | 5  |
| <i>circC16orf62</i> | miR-4270/4441/6754-5p | 1  |
| <i>circC16orf62</i> | miR-4275              | 1  |
| <i>circC16orf62</i> | miR-4277              | 1  |
| <i>circC16orf62</i> | miR-4279              | 1  |
| <i>circC16orf62</i> | miR-4284              | 3  |
| <i>circC16orf62</i> | miR-4292/6791-5p      | 2  |
| <i>circC16orf62</i> | miR-4293              | 1  |
| <i>circC16orf62</i> | miR-4297/5581-5p      | 3  |
| <i>circC16orf62</i> | miR-4299              | 1  |
| <i>circC16orf62</i> | miR-4301              | 1  |
| <i>circC16orf62</i> | miR-4303              | 4  |
| <i>circC16orf62</i> | miR-4304              | 1  |
| <i>circC16orf62</i> | miR-4308              | 2  |
| <i>circC16orf62</i> | miR-431-5p            | 4  |
| <i>circC16orf62</i> | miR-4311              | 1  |
| <i>circC16orf62</i> | miR-4312              | 2  |
| <i>circC16orf62</i> | miR-4314              | 1  |
| <i>circC16orf62</i> | miR-4317              | 3  |
| <i>circC16orf62</i> | miR-432-3p            | 3  |
| <i>circC16orf62</i> | miR-4324              | 2  |
| <i>circC16orf62</i> | miR-4417              | 3  |
| <i>circC16orf62</i> | miR-4422              | 2  |

|                     |                    |    |
|---------------------|--------------------|----|
| <i>circC16orf62</i> | miR-4425           | 1  |
| <i>circC16orf62</i> | miR-4427           | 1  |
| <i>circC16orf62</i> | miR-4433a-5p       | 3  |
| <i>circC16orf62</i> | miR-4435           | 1  |
| <i>circC16orf62</i> | miR-4438           | 7  |
| <i>circC16orf62</i> | miR-4443           | 1  |
| <i>circC16orf62</i> | miR-4446-5p        | 1  |
| <i>circC16orf62</i> | miR-4447/4472      | 2  |
| <i>circC16orf62</i> | miR-4448           | 13 |
| <i>circC16orf62</i> | miR-4450           | 1  |
| <i>circC16orf62</i> | miR-4451           | 2  |
| <i>circC16orf62</i> | miR-4452           | 1  |
| <i>circC16orf62</i> | miR-4456           | 1  |
| <i>circC16orf62</i> | miR-4457           | 2  |
| <i>circC16orf62</i> | miR-4462           | 1  |
| <i>circC16orf62</i> | miR-4464/4748      | 1  |
| <i>circC16orf62</i> | miR-4468           | 1  |
| <i>circC16orf62</i> | miR-4471/8059      | 5  |
| <i>circC16orf62</i> | miR-4474-3p        | 3  |
| <i>circC16orf62</i> | miR-4475           | 2  |
| <i>circC16orf62</i> | miR-4476/6876-5p   | 2  |
| <i>circC16orf62</i> | miR-4484           | 2  |
| <i>circC16orf62</i> | miR-4485-5p        | 2  |
| <i>circC16orf62</i> | miR-4491/4657      | 3  |
| <i>circC16orf62</i> | miR-4495           | 1  |
| <i>circC16orf62</i> | miR-4496           | 1  |
| <i>circC16orf62</i> | miR-4503           | 1  |
| <i>circC16orf62</i> | miR-4505/5787      | 4  |
| <i>circC16orf62</i> | miR-4509           | 1  |
| <i>circC16orf62</i> | miR-450a-1-3p      | 5  |
| <i>circC16orf62</i> | miR-450b-3p/769-3p | 3  |
| <i>circC16orf62</i> | miR-4514/4692      | 5  |
| <i>circC16orf62</i> | miR-451b           | 4  |
| <i>circC16orf62</i> | miR-452-3p         | 4  |
| <i>circC16orf62</i> | miR-4527/6503-5p   | 4  |
| <i>circC16orf62</i> | miR-4528           | 2  |
| <i>circC16orf62</i> | miR-4529-5p        | 1  |
| <i>circC16orf62</i> | miR-4536-3p        | 1  |



|                     |                     |   |
|---------------------|---------------------|---|
| <i>circC16orf62</i> | miR-455-3p.1        | 4 |
| <i>circC16orf62</i> | miR-455-3p.2        | 4 |
| <i>circC16orf62</i> | miR-4634            | 1 |
| <i>circC16orf62</i> | miR-4638-5p         | 1 |
| <i>circC16orf62</i> | miR-4639-3p         | 4 |
| <i>circC16orf62</i> | miR-4640-3p         | 1 |
| <i>circC16orf62</i> | miR-4640-5p         | 2 |
| <i>circC16orf62</i> | miR-4642            | 1 |
| <i>circC16orf62</i> | miR-4643            | 1 |
| <i>circC16orf62</i> | miR-4645-5p/4673    | 5 |
| <i>circC16orf62</i> | miR-4649-3p         | 4 |
| <i>circC16orf62</i> | miR-4650-3p         | 2 |
| <i>circC16orf62</i> | miR-4652-3p         | 1 |
| <i>circC16orf62</i> | miR-4653-3p         | 2 |
| <i>circC16orf62</i> | miR-4660            | 1 |
| <i>circC16orf62</i> | miR-4662-5p         | 2 |
| <i>circC16orf62</i> | miR-4663            | 5 |
| <i>circC16orf62</i> | miR-4666a-5p        | 2 |
| <i>circC16orf62</i> | miR-4667-3p         | 2 |
| <i>circC16orf62</i> | miR-4668-3p         | 2 |
| <i>circC16orf62</i> | miR-4680-3p         | 1 |
| <i>circC16orf62</i> | miR-4680-5p         | 3 |
| <i>circC16orf62</i> | miR-4682            | 5 |
| <i>circC16orf62</i> | miR-4684-3p         | 2 |
| <i>circC16orf62</i> | miR-4691-3p         | 3 |
| <i>circC16orf62</i> | miR-4691-5p/6792-3p | 5 |
| <i>circC16orf62</i> | miR-4695-3p         | 1 |
| <i>circC16orf62</i> | miR-4699-3p         | 2 |
| <i>circC16orf62</i> | miR-4700-3p         | 3 |
| <i>circC16orf62</i> | miR-4708-3p         | 2 |
| <i>circC16orf62</i> | miR-4709-3p         | 2 |
| <i>circC16orf62</i> | miR-4709-5p         | 5 |
| <i>circC16orf62</i> | miR-4711-3p         | 3 |
| <i>circC16orf62</i> | miR-4712-3p         | 2 |
| <i>circC16orf62</i> | miR-4713-3p         | 1 |
| <i>circC16orf62</i> | miR-4714-3p         | 2 |
| <i>circC16orf62</i> | miR-4715-5p         | 2 |
| <i>circC16orf62</i> | miR-4716-5p         | 2 |

|                     |                                  |   |
|---------------------|----------------------------------|---|
| <i>circC16orf62</i> | miR-4717-3p                      | 2 |
| <i>circC16orf62</i> | miR-4717-5p                      | 2 |
| <i>circC16orf62</i> | miR-4722-3p/6727-3p              | 1 |
| <i>circC16orf62</i> | miR-4723-5p/5698/6870-5p/7111-5p | 1 |
| <i>circC16orf62</i> | miR-4724-5p                      | 2 |
| <i>circC16orf62</i> | miR-4725-5p                      | 1 |
| <i>circC16orf62</i> | miR-4726-3p                      | 6 |
| <i>circC16orf62</i> | miR-4729                         | 1 |
| <i>circC16orf62</i> | miR-4731-3p/4801                 | 1 |
| <i>circC16orf62</i> | miR-4731-5p                      | 5 |
| <i>circC16orf62</i> | miR-4732-3p                      | 1 |
| <i>circC16orf62</i> | miR-4732-5p                      | 3 |
| <i>circC16orf62</i> | miR-4733-5p                      | 2 |
| <i>circC16orf62</i> | miR-4735-5p                      | 1 |
| <i>circC16orf62</i> | miR-4739                         | 1 |
| <i>circC16orf62</i> | miR-4740-3p                      | 1 |
| <i>circC16orf62</i> | miR-4742-3p                      | 1 |
| <i>circC16orf62</i> | miR-4742-5p                      | 5 |
| <i>circC16orf62</i> | miR-4743-3p                      | 1 |
| <i>circC16orf62</i> | miR-4744                         | 1 |
| <i>circC16orf62</i> | miR-4746-3p                      | 1 |
| <i>circC16orf62</i> | miR-4747-3p                      | 5 |
| <i>circC16orf62</i> | miR-4749-3p                      | 2 |
| <i>circC16orf62</i> | miR-4750-3p                      | 1 |
| <i>circC16orf62</i> | miR-4755-3p                      | 3 |
| <i>circC16orf62</i> | miR-4757-5p/6744-3p              | 2 |
| <i>circC16orf62</i> | miR-4761-5p                      | 1 |
| <i>circC16orf62</i> | miR-4762-5p                      | 1 |
| <i>circC16orf62</i> | miR-4766-5p                      | 3 |
| <i>circC16orf62</i> | miR-4768-5p/6833-3p              | 3 |
| <i>circC16orf62</i> | miR-4772-3p                      | 1 |
| <i>circC16orf62</i> | miR-4774-3p                      | 2 |
| <i>circC16orf62</i> | miR-4775                         | 2 |
| <i>circC16orf62</i> | miR-4776-3p                      | 3 |
| <i>circC16orf62</i> | miR-4778-5p                      | 1 |
| <i>circC16orf62</i> | miR-4781-3p                      | 1 |
| <i>circC16orf62</i> | miR-4789-3p                      | 1 |
| <i>circC16orf62</i> | miR-4793-3p                      | 2 |

|                     |                             |   |
|---------------------|-----------------------------|---|
| <i>circC16orf62</i> | miR-4793-5p                 | 6 |
| <i>circC16orf62</i> | miR-4796-3p                 | 1 |
| <i>circC16orf62</i> | miR-4800-3p                 | 1 |
| <i>circC16orf62</i> | miR-4802-3p                 | 2 |
| <i>circC16orf62</i> | miR-483-3p.1                | 5 |
| <i>circC16orf62</i> | miR-484/3155                | 5 |
| <i>circC16orf62</i> | miR-487a-5p/487b-5p         | 1 |
| <i>circC16orf62</i> | miR-488-3p                  | 1 |
| <i>circC16orf62</i> | miR-488-5p                  | 4 |
| <i>circC16orf62</i> | miR-489-3p                  | 3 |
| <i>circC16orf62</i> | miR-490-3p                  | 2 |
| <i>circC16orf62</i> | miR-491-5p                  | 2 |
| <i>circC16orf62</i> | miR-493-5p                  | 1 |
| <i>circC16orf62</i> | miR-494-3p                  | 2 |
| <i>circC16orf62</i> | miR-495-5p                  | 1 |
| <i>circC16orf62</i> | miR-499a-5p                 | 1 |
| <i>circC16orf62</i> | miR-5000-5p                 | 5 |
| <i>circC16orf62</i> | miR-5002-3p                 | 1 |
| <i>circC16orf62</i> | miR-5003-5p                 | 2 |
| <i>circC16orf62</i> | miR-5007-5p                 | 1 |
| <i>circC16orf62</i> | miR-5008-3p/6737-3p/7157-3p | 1 |
| <i>circC16orf62</i> | miR-5008-5p                 | 4 |
| <i>circC16orf62</i> | miR-5009-3p                 | 2 |
| <i>circC16orf62</i> | miR-500a-3p                 | 2 |
| <i>circC16orf62</i> | miR-500a-5p                 | 5 |
| <i>circC16orf62</i> | miR-500b-3p                 | 2 |
| <i>circC16orf62</i> | miR-501-5p                  | 5 |
| <i>circC16orf62</i> | miR-5010-3p                 | 1 |
| <i>circC16orf62</i> | miR-5010-5p                 | 1 |
| <i>circC16orf62</i> | miR-503-3p                  | 1 |
| <i>circC16orf62</i> | miR-503-5p                  | 1 |
| <i>circC16orf62</i> | miR-504-5p.1                | 2 |
| <i>circC16orf62</i> | miR-505-3p.2                | 5 |
| <i>circC16orf62</i> | miR-5089-5p                 | 3 |
| <i>circC16orf62</i> | miR-509-3-5p/509-5p/4418    | 3 |
| <i>circC16orf62</i> | miR-509-3p                  | 5 |
| <i>circC16orf62</i> | miR-5093                    | 1 |
| <i>circC16orf62</i> | miR-5094                    | 1 |

|                     |                                                                  |   |
|---------------------|------------------------------------------------------------------|---|
| <i>circC16orf62</i> | miR-5095/7151-3p                                                 | 4 |
| <i>circC16orf62</i> | miR-5096                                                         | 3 |
| <i>circC16orf62</i> | miR-511-3p                                                       | 2 |
| <i>circC16orf62</i> | miR-512-3p                                                       | 2 |
| <i>circC16orf62</i> | miR-513a-3p/513c-3p/3606-3p                                      | 2 |
| <i>circC16orf62</i> | miR-513a-5p                                                      | 5 |
| <i>circC16orf62</i> | miR-516a-3p/516b-3p/7162-5p                                      | 1 |
| <i>circC16orf62</i> | miR-516a-5p                                                      | 1 |
| <i>circC16orf62</i> | miR-517-3p                                                       | 1 |
| <i>circC16orf62</i> | miR-5186                                                         | 1 |
| <i>circC16orf62</i> | miR-5187-3p                                                      | 1 |
| <i>circC16orf62</i> | miR-5187-5p                                                      | 1 |
| <i>circC16orf62</i> | miR-518a-5p/527                                                  | 5 |
| <i>circC16orf62</i> | miR-519-3p                                                       | 2 |
| <i>circC16orf62</i> | miR-5193                                                         | 3 |
| <i>circC16orf62</i> | miR-5196-3p                                                      | 6 |
| <i>circC16orf62</i> | miR-520f-5p                                                      | 1 |
| <i>circC16orf62</i> | miR-520g-3p                                                      | 6 |
| <i>circC16orf62</i> | miR-520g-5p                                                      | 1 |
| <i>circC16orf62</i> | miR-524-5p                                                       | 3 |
| <i>circC16orf62</i> | miR-525-5p                                                       | 4 |
| <i>circC16orf62</i> | miR-532-3p                                                       | 5 |
| <i>circC16orf62</i> | miR-539-5p                                                       | 2 |
| <i>circC16orf62</i> | miR-541-5p                                                       | 1 |
| <i>circC16orf62</i> | miR-543                                                          | 2 |
| <i>circC16orf62</i> | miR-544b                                                         | 2 |
| <i>circC16orf62</i> | miR-545-3p                                                       | 5 |
| <i>circC16orf62</i> | miR-548ac/548bb-3p/548d-3p/548h-3p/548z                          |   |
| <i>circC16orf62</i> | miR-548ah-5p/3609                                                | 2 |
| <i>circC16orf62</i> | miR-548an                                                        | 2 |
| <i>circC16orf62</i> | miR-548ao-3p                                                     | 1 |
| <i>circC16orf62</i> | miR-548ao-5p/548ax                                               | 1 |
| <i>circC16orf62</i> | miR-548aq-3p/548am-3p/548aj-3p/548ah-3p/548ae-3p/548j-3p/548x-3p |   |
| <i>circC16orf62</i> | miR-548at-5p                                                     | 1 |
| <i>circC16orf62</i> | miR-548au-3p                                                     | 4 |
| <i>circC16orf62</i> | miR-548av-5p/548k/8054                                           | 1 |
| <i>circC16orf62</i> | miR-548aw                                                        | 5 |
| <i>circC16orf62</i> | miR-548ay-5p/548au-5p/548as-5p/548ar-5p/548aq-5p/548ap-5p/548am- |   |

|                     |                                               |   |
|---------------------|-----------------------------------------------|---|
| <i>circC16orf62</i> | miR-548az-3p/548ar-3p/548a-3p/548e-3p/548f-3p |   |
| <i>circC16orf62</i> | miR-548c-3p                                   | 3 |
| <i>circC16orf62</i> | miR-548g-3p                                   | 4 |
| <i>circC16orf62</i> | miR-548l                                      | 1 |
| <i>circC16orf62</i> | miR-548q                                      | 1 |
| <i>circC16orf62</i> | miR-548s                                      | 1 |
| <i>circC16orf62</i> | miR-548u/7161-5p                              | 2 |
| <i>circC16orf62</i> | miR-551b-5p                                   | 2 |
| <i>circC16orf62</i> | miR-552-3p                                    | 1 |
| <i>circC16orf62</i> | miR-5571-5p                                   | 2 |
| <i>circC16orf62</i> | miR-5579-5p                                   | 3 |
| <i>circC16orf62</i> | miR-5582-3p                                   | 3 |
| <i>circC16orf62</i> | miR-5582-5p                                   | 2 |
| <i>circC16orf62</i> | miR-5584-3p                                   | 1 |
| <i>circC16orf62</i> | miR-5584-5p                                   | 1 |
| <i>circC16orf62</i> | miR-5585-3p                                   | 2 |
| <i>circC16orf62</i> | miR-5585-5p                                   | 1 |
| <i>circC16orf62</i> | miR-5586-3p                                   | 1 |
| <i>circC16orf62</i> | miR-5586-5p                                   | 4 |
| <i>circC16orf62</i> | miR-5588-3p                                   | 3 |
| <i>circC16orf62</i> | miR-5589-3p                                   | 1 |
| <i>circC16orf62</i> | miR-5589-5p                                   | 5 |
| <i>circC16orf62</i> | miR-561-3p                                    | 1 |
| <i>circC16orf62</i> | miR-561-5p                                    | 1 |
| <i>circC16orf62</i> | miR-567                                       | 2 |
| <i>circC16orf62</i> | miR-5681a                                     | 2 |
| <i>circC16orf62</i> | miR-5683                                      | 2 |
| <i>circC16orf62</i> | miR-5684                                      | 2 |
| <i>circC16orf62</i> | miR-5687                                      | 2 |
| <i>circC16orf62</i> | miR-569                                       | 1 |
| <i>circC16orf62</i> | miR-5691                                      | 3 |
| <i>circC16orf62</i> | miR-5693                                      | 4 |
| <i>circC16orf62</i> | miR-5696                                      | 2 |
| <i>circC16orf62</i> | miR-5697                                      | 2 |
| <i>circC16orf62</i> | miR-570-3p                                    | 3 |
| <i>circC16orf62</i> | miR-5702                                      | 6 |
| <i>circC16orf62</i> | miR-5704                                      | 2 |
| <i>circC16orf62</i> | miR-571                                       | 1 |

|                     |                    |   |
|---------------------|--------------------|---|
| <i>circC16orf62</i> | miR-575/4676-5p    | 3 |
| <i>circC16orf62</i> | miR-577            | 1 |
| <i>circC16orf62</i> | miR-579-3p         | 2 |
| <i>circC16orf62</i> | miR-580-3p         | 4 |
| <i>circC16orf62</i> | miR-580-5p         | 1 |
| <i>circC16orf62</i> | miR-582-3p         | 1 |
| <i>circC16orf62</i> | miR-583            | 1 |
| <i>circC16orf62</i> | miR-587            | 3 |
| <i>circC16orf62</i> | miR-588            | 1 |
| <i>circC16orf62</i> | miR-590-3p         | 3 |
| <i>circC16orf62</i> | miR-593-5p         | 1 |
| <i>circC16orf62</i> | miR-596            | 1 |
| <i>circC16orf62</i> | miR-597-5p         | 1 |
| <i>circC16orf62</i> | miR-598-3p         | 2 |
| <i>circC16orf62</i> | miR-598-5p         | 2 |
| <i>circC16orf62</i> | miR-604            | 1 |
| <i>circC16orf62</i> | miR-605-5p         | 3 |
| <i>circC16orf62</i> | miR-607            | 2 |
| <i>circC16orf62</i> | miR-6070           | 5 |
| <i>circC16orf62</i> | miR-6074           | 1 |
| <i>circC16orf62</i> | miR-6076/6797-3p   | 2 |
| <i>circC16orf62</i> | miR-6078           | 2 |
| <i>circC16orf62</i> | miR-608/4651       | 1 |
| <i>circC16orf62</i> | miR-6084           | 1 |
| <i>circC16orf62</i> | miR-6089           | 4 |
| <i>circC16orf62</i> | miR-6090           | 4 |
| <i>circC16orf62</i> | miR-610            | 1 |
| <i>circC16orf62</i> | miR-6134           | 1 |
| <i>circC16orf62</i> | miR-616-3p         | 2 |
| <i>circC16orf62</i> | miR-618            | 1 |
| <i>circC16orf62</i> | miR-619-3p         | 2 |
| <i>circC16orf62</i> | miR-619-5p/6506-5p | 4 |
| <i>circC16orf62</i> | miR-624-3p         | 4 |
| <i>circC16orf62</i> | miR-625-5p         | 1 |
| <i>circC16orf62</i> | miR-627-3p         | 2 |
| <i>circC16orf62</i> | miR-627-5p         | 5 |
| <i>circC16orf62</i> | miR-628-5p         | 5 |
| <i>circC16orf62</i> | miR-629-3p         | 1 |

|                     |                     |   |
|---------------------|---------------------|---|
| <i>circC16orf62</i> | miR-629-5p          | 2 |
| <i>circC16orf62</i> | miR-632/4288        | 4 |
| <i>circC16orf62</i> | miR-635/6774-5p     | 2 |
| <i>circC16orf62</i> | miR-636             | 2 |
| <i>circC16orf62</i> | miR-638             | 1 |
| <i>circC16orf62</i> | miR-640             | 2 |
| <i>circC16orf62</i> | miR-641/3617-5p     | 2 |
| <i>circC16orf62</i> | miR-642-3p          | 1 |
| <i>circC16orf62</i> | miR-646             | 1 |
| <i>circC16orf62</i> | miR-648             | 1 |
| <i>circC16orf62</i> | miR-649             | 2 |
| <i>circC16orf62</i> | miR-6499-3p         | 2 |
| <i>circC16orf62</i> | miR-6504-3p         | 2 |
| <i>circC16orf62</i> | miR-6505-5p         | 1 |
| <i>circC16orf62</i> | miR-6507-3p         | 4 |
| <i>circC16orf62</i> | miR-6508-3p         | 2 |
| <i>circC16orf62</i> | miR-651-3p          | 3 |
| <i>circC16orf62</i> | miR-6511-5p         | 3 |
| <i>circC16orf62</i> | miR-6513-5p         | 5 |
| <i>circC16orf62</i> | miR-6515-5p         | 1 |
| <i>circC16orf62</i> | miR-6516-5p         | 2 |
| <i>circC16orf62</i> | miR-653-3p          | 2 |
| <i>circC16orf62</i> | miR-654-3p          | 1 |
| <i>circC16orf62</i> | miR-654-5p          | 2 |
| <i>circC16orf62</i> | miR-655-5p          | 1 |
| <i>circC16orf62</i> | miR-656-5p          | 1 |
| <i>circC16orf62</i> | miR-657             | 3 |
| <i>circC16orf62</i> | miR-659-3p          | 6 |
| <i>circC16orf62</i> | miR-660-3p          | 3 |
| <i>circC16orf62</i> | miR-661             | 2 |
| <i>circC16orf62</i> | miR-664a-3p         | 3 |
| <i>circC16orf62</i> | miR-664a-5p/4794    | 4 |
| <i>circC16orf62</i> | miR-668-5p          | 1 |
| <i>circC16orf62</i> | miR-6716-5p         | 1 |
| <i>circC16orf62</i> | miR-6719-3p         | 3 |
| <i>circC16orf62</i> | miR-6720-3p         | 1 |
| <i>circC16orf62</i> | miR-6720-5p         | 7 |
| <i>circC16orf62</i> | miR-6724-5p/6773-5p | 2 |

|                     |                             |   |
|---------------------|-----------------------------|---|
| <i>circC16orf62</i> | miR-6726-3p                 | 1 |
| <i>circC16orf62</i> | miR-6728-5p                 | 3 |
| <i>circC16orf62</i> | miR-6730-3p                 | 3 |
| <i>circC16orf62</i> | miR-6730-5p                 | 2 |
| <i>circC16orf62</i> | miR-6732-3p                 | 3 |
| <i>circC16orf62</i> | miR-6736-3p                 | 8 |
| <i>circC16orf62</i> | miR-6737-5p/6812-5p/6819-5p | 1 |
| <i>circC16orf62</i> | miR-6741-3p                 | 1 |
| <i>circC16orf62</i> | miR-6741-5p                 | 1 |
| <i>circC16orf62</i> | miR-6742-3p                 | 2 |
| <i>circC16orf62</i> | miR-6742-5p                 | 2 |
| <i>circC16orf62</i> | miR-6744-5p                 | 4 |
| <i>circC16orf62</i> | miR-6747-3p                 | 1 |
| <i>circC16orf62</i> | miR-6747-5p                 | 1 |
| <i>circC16orf62</i> | miR-6749-3p                 | 5 |
| <i>circC16orf62</i> | miR-6750-5p/6822-5p         | 1 |
| <i>circC16orf62</i> | miR-6751-5p/6803-5p         | 2 |
| <i>circC16orf62</i> | miR-6752-3p                 | 1 |
| <i>circC16orf62</i> | miR-6752-5p/6842-5p/7110-5p | 1 |
| <i>circC16orf62</i> | miR-6753-3p/7107-3p         | 4 |
| <i>circC16orf62</i> | miR-6756-5p/6766-5p         | 2 |
| <i>circC16orf62</i> | miR-6757-3p                 | 2 |
| <i>circC16orf62</i> | miR-6757-5p                 | 1 |
| <i>circC16orf62</i> | miR-6759-5p                 | 2 |
| <i>circC16orf62</i> | miR-6760-3p                 | 1 |
| <i>circC16orf62</i> | miR-6760-5p                 | 1 |
| <i>circC16orf62</i> | miR-6762-3p                 | 1 |
| <i>circC16orf62</i> | miR-6765-5p                 | 4 |
| <i>circC16orf62</i> | miR-6768-3p                 | 2 |
| <i>circC16orf62</i> | miR-6768-5p                 | 2 |
| <i>circC16orf62</i> | miR-6769a-5p/6769b-5p       | 2 |
| <i>circC16orf62</i> | miR-6772-3p                 | 1 |
| <i>circC16orf62</i> | miR-6776-5p                 | 2 |
| <i>circC16orf62</i> | miR-6778-3p                 | 4 |
| <i>circC16orf62</i> | miR-6780a-3p                | 5 |
| <i>circC16orf62</i> | miR-6782-3p                 | 1 |
| <i>circC16orf62</i> | miR-6782-5p                 | 1 |
| <i>circC16orf62</i> | miR-6786-5p                 | 1 |



|                     |                     |   |
|---------------------|---------------------|---|
| <i>circC16orf62</i> | miR-6787-3p         | 6 |
| <i>circC16orf62</i> | miR-6790-3p         | 1 |
| <i>circC16orf62</i> | miR-6791-3p/6829-3p | 4 |
| <i>circC16orf62</i> | miR-6792-5p         | 1 |
| <i>circC16orf62</i> | miR-6794-3p         | 2 |
| <i>circC16orf62</i> | miR-6796-5p         | 2 |
| <i>circC16orf62</i> | miR-6798-3p         | 1 |
| <i>circC16orf62</i> | miR-6798-5p         | 1 |
| <i>circC16orf62</i> | miR-6799-5p         | 5 |
| <i>circC16orf62</i> | miR-6801-3p/6810-3p | 2 |
| <i>circC16orf62</i> | miR-6804-3p         | 3 |
| <i>circC16orf62</i> | miR-6806-5p         | 2 |
| <i>circC16orf62</i> | miR-6807-5p         | 3 |
| <i>circC16orf62</i> | miR-6809-3p         | 3 |
| <i>circC16orf62</i> | miR-6815-5p/6865-5p | 1 |
| <i>circC16orf62</i> | miR-6816-3p         | 2 |
| <i>circC16orf62</i> | miR-6819-3p/6877-3p | 4 |
| <i>circC16orf62</i> | miR-6821-3p         | 1 |
| <i>circC16orf62</i> | miR-6823-5p         | 1 |
| <i>circC16orf62</i> | miR-6827-5p         | 5 |
| <i>circC16orf62</i> | miR-6830-3p         | 2 |
| <i>circC16orf62</i> | miR-6830-5p         | 1 |
| <i>circC16orf62</i> | miR-6832-5p         | 3 |
| <i>circC16orf62</i> | miR-6835-5p         | 1 |
| <i>circC16orf62</i> | miR-6836-3p         | 2 |
| <i>circC16orf62</i> | miR-6837-3p         | 3 |
| <i>circC16orf62</i> | miR-6839-3p         | 2 |
| <i>circC16orf62</i> | miR-6840-3p         | 6 |
| <i>circC16orf62</i> | miR-6841-3p         | 1 |
| <i>circC16orf62</i> | miR-6843-3p/6848-3p | 4 |
| <i>circC16orf62</i> | miR-6844            | 3 |
| <i>circC16orf62</i> | miR-6849-3p         | 6 |
| <i>circC16orf62</i> | miR-6852-5p         | 2 |
| <i>circC16orf62</i> | miR-6858-3p         | 3 |
| <i>circC16orf62</i> | miR-6861-5p         | 2 |
| <i>circC16orf62</i> | miR-6867-5p         | 1 |
| <i>circC16orf62</i> | miR-6868-3p         | 5 |
| <i>circC16orf62</i> | miR-6878-3p         | 4 |

|                     |             |   |
|---------------------|-------------|---|
| <i>circC16orf62</i> | miR-6880-3p | 1 |
| <i>circC16orf62</i> | miR-6881-3p | 5 |
| <i>circC16orf62</i> | miR-6881-5p | 2 |
| <i>circC16orf62</i> | miR-6882-3p | 1 |
| <i>circC16orf62</i> | miR-6884-3p | 3 |
| <i>circC16orf62</i> | miR-6885-3p | 4 |
| <i>circC16orf62</i> | miR-6888-3p | 3 |
| <i>circC16orf62</i> | miR-6889-3p | 1 |
| <i>circC16orf62</i> | miR-6890-3p | 1 |
| <i>circC16orf62</i> | miR-6890-5p | 1 |
| <i>circC16orf62</i> | miR-7-3p    | 2 |
| <i>circC16orf62</i> | miR-7106-5p | 5 |
| <i>circC16orf62</i> | miR-7108-3p | 1 |
| <i>circC16orf62</i> | miR-7108-5p | 3 |
| <i>circC16orf62</i> | miR-7109-5p | 2 |
| <i>circC16orf62</i> | miR-7111-3p | 5 |
| <i>circC16orf62</i> | miR-7114-5p | 1 |
| <i>circC16orf62</i> | miR-7150    | 4 |
| <i>circC16orf62</i> | miR-7152-3p | 3 |
| <i>circC16orf62</i> | miR-7152-5p | 3 |
| <i>circC16orf62</i> | miR-7153-3p | 2 |
| <i>circC16orf62</i> | miR-7156-3p | 1 |
| <i>circC16orf62</i> | miR-7158-5p | 1 |
| <i>circC16orf62</i> | miR-7159-5p | 5 |
| <i>circC16orf62</i> | miR-7160-5p | 5 |
| <i>circC16orf62</i> | miR-7162-3p | 4 |
| <i>circC16orf62</i> | miR-744-3p  | 2 |
| <i>circC16orf62</i> | miR-758-5p  | 5 |
| <i>circC16orf62</i> | miR-764     | 1 |
| <i>circC16orf62</i> | miR-7641    | 1 |
| <i>circC16orf62</i> | miR-766-3p  | 3 |
| <i>circC16orf62</i> | miR-767-5p  | 2 |
| <i>circC16orf62</i> | miR-770-5p  | 2 |
| <i>circC16orf62</i> | miR-7702    | 1 |
| <i>circC16orf62</i> | miR-7844-5p | 1 |
| <i>circC16orf62</i> | miR-7845-5p | 1 |
| <i>circC16orf62</i> | miR-7847-3p | 1 |
| <i>circC16orf62</i> | miR-7851-3p | 2 |

|                     |                                       |   |
|---------------------|---------------------------------------|---|
| <i>circC16orf62</i> | miR-7852-3p                           | 1 |
| <i>circC16orf62</i> | miR-7854-3p                           | 1 |
| <i>circC16orf62</i> | miR-7856-5p                           | 1 |
| <i>circC16orf62</i> | miR-7977                              | 5 |
| <i>circC16orf62</i> | miR-7978                              | 1 |
| <i>circC16orf62</i> | miR-8055                              | 3 |
| <i>circC16orf62</i> | miR-8057                              | 2 |
| <i>circC16orf62</i> | miR-8066                              | 4 |
| <i>circC16orf62</i> | miR-8077                              | 5 |
| <i>circC16orf62</i> | miR-8080                              | 2 |
| <i>circC16orf62</i> | miR-873-5p.1                          | 2 |
| <i>circC16orf62</i> | miR-874-5p                            | 1 |
| <i>circC16orf62</i> | miR-875-3p                            | 1 |
| <i>circC16orf62</i> | miR-885-5p                            | 2 |
| <i>circC16orf62</i> | miR-887-5p                            | 5 |
| <i>circC16orf62</i> | miR-889-5p                            | 1 |
| <i>circC16orf62</i> | miR-891a-3p                           | 4 |
| <i>circC16orf62</i> | miR-891b                              | 1 |
| <i>circC16orf62</i> | miR-920/4300/5591-5p/6726-5p          | 4 |
| <i>circC16orf62</i> | miR-92a-1-5p                          | 1 |
| <i>circC16orf62</i> | miR-92a-2-5p                          | 2 |
| <i>circC16orf62</i> | miR-93-3p                             | 5 |
| <i>circC16orf62</i> | miR-937-5p                            | 5 |
| <i>circC16orf62</i> | miR-939-3p                            | 2 |
| <i>circC16orf62</i> | miR-940/6808-5p/6893-5p               | 2 |
| <i>circC16orf62</i> | miR-942-5p                            | 3 |
| <i>circC16orf62</i> | miR-943                               | 1 |
| <i>circC16orf62</i> | miR-9500                              | 1 |
| <i>circC16orf62</i> | miR-96-3p                             | 2 |
| <i>circC16orf62</i> | let-7-5p/98-5p                        | 3 |
| <i>circC16orf62</i> | let-7a-3p/let-7b-3p/let-7f-1-3p/98-3p | 1 |
| <i>circC16orf62</i> | let-7f-2-3p/1185-3p                   | 1 |
| <i>circC16orf62</i> | miR-100-3p                            | 1 |
| <i>circC16orf62</i> | miR-101-3p.2                          | 3 |
| <i>circC16orf62</i> | miR-106a-3p                           | 1 |
| <i>circC16orf62</i> | miR-1178-5p                           | 2 |
| <i>circC16orf62</i> | miR-1179                              | 1 |
| <i>circC16orf62</i> | miR-1182                              | 2 |

|                     |                          |   |
|---------------------|--------------------------|---|
| <i>circC16orf62</i> | miR-1185-5p              | 2 |
| <i>circC16orf62</i> | miR-1207-5p/4763-3p      | 4 |
| <i>circC16orf62</i> | miR-1226-3p              | 4 |
| <i>circC16orf62</i> | miR-1227-5p              | 2 |
| <i>circC16orf62</i> | miR-1228-3p              | 1 |
| <i>circC16orf62</i> | miR-1234-3p/7107-5p      | 1 |
| <i>circC16orf62</i> | miR-1236-5p              | 1 |
| <i>circC16orf62</i> | miR-1237-5p/4488/4697-5p | 3 |
| <i>circC16orf62</i> | miR-1238-5p/4758-5p      | 1 |
| <i>circC16orf62</i> | miR-1244                 | 1 |
| <i>circC16orf62</i> | miR-1245a/8079           | 3 |
| <i>circC16orf62</i> | miR-1245b-5p             | 2 |
| <i>circC16orf62</i> | miR-1250-3p              | 1 |
| <i>circC16orf62</i> | miR-1252-3p              | 1 |
| <i>circC16orf62</i> | miR-1253                 | 2 |
| <i>circC16orf62</i> | miR-1256                 | 2 |
| <i>circC16orf62</i> | miR-126-5p               | 2 |
| <i>circC16orf62</i> | miR-1269                 | 1 |
| <i>circC16orf62</i> | miR-127-5p               | 3 |
| <i>circC16orf62</i> | miR-1272                 | 1 |
| <i>circC16orf62</i> | miR-1273f                | 6 |
| <i>circC16orf62</i> | miR-1273g-3p             | 1 |
| <i>circC16orf62</i> | miR-1283                 | 1 |
| <i>circC16orf62</i> | miR-1287-3p              | 1 |
| <i>circC16orf62</i> | miR-1289                 | 1 |
| <i>circC16orf62</i> | miR-129-3p               | 2 |
| <i>circC16orf62</i> | miR-1291/6775-3p         | 1 |
| <i>circC16orf62</i> | miR-1295b-3p             | 1 |
| <i>circC16orf62</i> | miR-1295b-5p/1912        | 1 |
| <i>circC16orf62</i> | miR-1298-3p              | 1 |
| <i>circC16orf62</i> | miR-1299                 | 7 |
| <i>circC16orf62</i> | miR-1301-5p/6502-5p      | 2 |
| <i>circC16orf62</i> | miR-1302/4298            | 2 |
| <i>circC16orf62</i> | miR-1306-5p              | 4 |
| <i>circC16orf62</i> | miR-1322                 | 1 |
| <i>circC16orf62</i> | miR-1323                 | 3 |
| <i>circC16orf62</i> | miR-1324                 | 2 |
| <i>circC16orf62</i> | miR-133a-3p.1            | 1 |

|                     |                     |   |
|---------------------|---------------------|---|
| <i>circC16orf62</i> | miR-133a-5p         | 5 |
| <i>circC16orf62</i> | miR-138-5p          | 5 |
| <i>circC16orf62</i> | miR-139-3p          | 4 |
| <i>circC16orf62</i> | miR-139-5p          | 2 |
| <i>circC16orf62</i> | miR-140-3p.1        | 1 |
| <i>circC16orf62</i> | miR-140-3p.2        | 1 |
| <i>circC16orf62</i> | miR-141-5p          | 2 |
| <i>circC16orf62</i> | miR-142-5p          | 1 |
| <i>circC16orf62</i> | miR-143-3p          | 6 |
| <i>circC16orf62</i> | miR-145-5p          | 3 |
| <i>circC16orf62</i> | miR-1468-3p         | 3 |
| <i>circC16orf62</i> | miR-146b-3p         | 1 |
| <i>circC16orf62</i> | miR-147a            | 1 |
| <i>circC16orf62</i> | miR-152-5p          | 6 |
| <i>circC16orf62</i> | miR-1587/3620-5p    | 1 |
| <i>circC16orf62</i> | miR-15b-3p          | 2 |
| <i>circC16orf62</i> | miR-181-5p          | 1 |
| <i>circC16orf62</i> | miR-182-3p          | 5 |
| <i>circC16orf62</i> | miR-183-5p.1        | 4 |
| <i>circC16orf62</i> | miR-187-3p          | 1 |
| <i>circC16orf62</i> | miR-19-3p           | 1 |
| <i>circC16orf62</i> | miR-19-5p           | 2 |
| <i>circC16orf62</i> | miR-190-5p          | 1 |
| <i>circC16orf62</i> | miR-1908-5p         | 3 |
| <i>circC16orf62</i> | miR-1909-3p/6722-3p | 1 |
| <i>circC16orf62</i> | miR-190a-3p         | 1 |
| <i>circC16orf62</i> | miR-1911-5p         | 1 |
| <i>circC16orf62</i> | miR-193-3p          | 1 |
| <i>circC16orf62</i> | miR-196a-3p         | 3 |
| <i>circC16orf62</i> | miR-196b-3p         | 1 |
| <i>circC16orf62</i> | miR-1972            | 4 |
| <i>circC16orf62</i> | miR-1973            | 1 |
| <i>circC16orf62</i> | miR-199-3p          | 2 |
| <i>circC16orf62</i> | miR-200-3p/429      | 1 |
| <i>circC16orf62</i> | miR-202-3p          | 3 |
| <i>circC16orf62</i> | miR-203a-3p.1       | 1 |
| <i>circC16orf62</i> | miR-203b-3p         | 5 |
| <i>circC16orf62</i> | miR-203b-5p/6718-5p | 3 |

|                     |                                     |   |
|---------------------|-------------------------------------|---|
| <i>circC16orf62</i> | miR-2052                            | 2 |
| <i>circC16orf62</i> | miR-21-5p/590-5p                    | 1 |
| <i>circC16orf62</i> | miR-2110                            | 2 |
| <i>circC16orf62</i> | miR-2116-5p                         | 3 |
| <i>circC16orf62</i> | miR-214-3p/3619-5p                  | 2 |
| <i>circC16orf62</i> | miR-215-3p                          | 3 |
| <i>circC16orf62</i> | miR-216a-5p                         | 2 |
| <i>circC16orf62</i> | miR-216b-5p                         | 2 |
| <i>circC16orf62</i> | miR-218-1-3p                        | 5 |
| <i>circC16orf62</i> | miR-218-2-3p                        | 5 |
| <i>circC16orf62</i> | miR-219a-2-3p                       | 1 |
| <i>circC16orf62</i> | miR-219b-3p                         | 1 |
| <i>circC16orf62</i> | miR-219b-5p                         | 2 |
| <i>circC16orf62</i> | miR-22-5p                           | 3 |
| <i>circC16orf62</i> | miR-2276-5p                         | 1 |
| <i>circC16orf62</i> | miR-2277-3p                         | 1 |
| <i>circC16orf62</i> | miR-2355-5p                         | 4 |
| <i>circC16orf62</i> | miR-2467-3p                         | 3 |
| <i>circC16orf62</i> | miR-25-3p/32-5p/92-3p/363-3p/367-3p | 3 |
| <i>circC16orf62</i> | miR-2682-3p/6781-3p                 | 1 |
| <i>circC16orf62</i> | miR-298                             | 1 |
| <i>circC16orf62</i> | miR-302b-5p/302d-5p                 | 2 |
| <i>circC16orf62</i> | miR-3064-5p                         | 1 |
| <i>circC16orf62</i> | miR-3065-3p                         | 2 |
| <i>circC16orf62</i> | miR-3074-3p                         | 1 |
| <i>circC16orf62</i> | miR-31-3p                           | 2 |
| <i>circC16orf62</i> | miR-31-5p                           | 1 |
| <i>circC16orf62</i> | miR-3115                            | 1 |
| <i>circC16orf62</i> | miR-3120-3p                         | 3 |
| <i>circC16orf62</i> | miR-3124-3p                         | 4 |
| <i>circC16orf62</i> | miR-3126-3p                         | 1 |
| <i>circC16orf62</i> | miR-3127-3p/6756-3p                 | 1 |
| <i>circC16orf62</i> | miR-3128                            | 2 |
| <i>circC16orf62</i> | miR-3130-5p/4482-5p                 | 1 |
| <i>circC16orf62</i> | miR-3134                            | 1 |
| <i>circC16orf62</i> | miR-3143                            | 1 |
| <i>circC16orf62</i> | miR-3145-5p                         | 2 |
| <i>circC16orf62</i> | miR-3148                            | 1 |

|                     |                           |   |
|---------------------|---------------------------|---|
| <i>circC16orf62</i> | miR-3150a-3p              | 2 |
| <i>circC16orf62</i> | miR-3153/6733-5p/6739-5p  | 2 |
| <i>circC16orf62</i> | miR-3156-5p               | 3 |
| <i>circC16orf62</i> | miR-3160-5p               | 1 |
| <i>circC16orf62</i> | miR-3166                  | 2 |
| <i>circC16orf62</i> | miR-3173-3p/6891-5p       | 1 |
| <i>circC16orf62</i> | miR-3173-5p               | 1 |
| <i>circC16orf62</i> | miR-3174                  | 1 |
| <i>circC16orf62</i> | miR-3175                  | 3 |
| <i>circC16orf62</i> | miR-3183/4723-3p/6769b-3p | 1 |
| <i>circC16orf62</i> | miR-3192-3p               | 1 |
| <i>circC16orf62</i> | miR-3199/8052             | 2 |
| <i>circC16orf62</i> | miR-320                   | 1 |
| <i>circC16orf62</i> | miR-3200-3p               | 3 |
| <i>circC16orf62</i> | miR-3200-5p               | 2 |
| <i>circC16orf62</i> | miR-3202                  | 2 |
| <i>circC16orf62</i> | miR-326                   | 2 |
| <i>circC16orf62</i> | miR-328-3p                | 1 |
| <i>circC16orf62</i> | miR-331-5p                | 1 |
| <i>circC16orf62</i> | miR-337-5p                | 1 |
| <i>circC16orf62</i> | miR-338-5p                | 1 |
| <i>circC16orf62</i> | miR-340-5p                | 5 |
| <i>circC16orf62</i> | miR-346                   | 1 |
| <i>circC16orf62</i> | miR-34a-3p                | 2 |
| <i>circC16orf62</i> | miR-3605-5p               | 2 |
| <i>circC16orf62</i> | miR-3606-5p               | 2 |
| <i>circC16orf62</i> | miR-3607-5p               | 1 |
| <i>circC16orf62</i> | miR-3615                  | 2 |
| <i>circC16orf62</i> | miR-3617-3p               | 2 |
| <i>circC16orf62</i> | miR-3619-3p               | 4 |
| <i>circC16orf62</i> | miR-3621                  | 3 |
| <i>circC16orf62</i> | miR-3622a-3p/3622b-3p     | 2 |
| <i>circC16orf62</i> | miR-3646                  | 1 |
| <i>circC16orf62</i> | miR-3656                  | 3 |
| <i>circC16orf62</i> | miR-365a-5p/365b-5p       | 2 |
| <i>circC16orf62</i> | miR-3662                  | 1 |
| <i>circC16orf62</i> | miR-3663-3p               | 2 |
| <i>circC16orf62</i> | miR-3664-5p               | 1 |

|                     |                  |   |
|---------------------|------------------|---|
| <i>circC16orf62</i> | miR-3667-3p      | 2 |
| <i>circC16orf62</i> | miR-3671         | 2 |
| <i>circC16orf62</i> | miR-3672/6864-3p | 3 |
| <i>circC16orf62</i> | miR-3674         | 3 |
| <i>circC16orf62</i> | miR-3675-3p      | 2 |
| <i>circC16orf62</i> | miR-3679-3p      | 1 |
| <i>circC16orf62</i> | miR-3680-3p      | 1 |
| <i>circC16orf62</i> | miR-3682-5p      | 1 |
| <i>circC16orf62</i> | miR-3684         | 2 |
| <i>circC16orf62</i> | miR-3688-3p      | 1 |
| <i>circC16orf62</i> | miR-369-5p       | 1 |
| <i>circC16orf62</i> | miR-3691-3p      | 1 |
| <i>circC16orf62</i> | miR-3692-3p      | 3 |
| <i>circC16orf62</i> | miR-3713         | 4 |
| <i>circC16orf62</i> | miR-375          | 2 |
| <i>circC16orf62</i> | miR-378-3p       | 5 |
| <i>circC16orf62</i> | miR-378g         | 1 |
| <i>circC16orf62</i> | miR-381-3p       | 1 |
| <i>circC16orf62</i> | miR-383-3p       | 2 |
| <i>circC16orf62</i> | miR-383-5p.1     | 1 |
| <i>circC16orf62</i> | miR-3909         | 2 |
| <i>circC16orf62</i> | miR-3911         | 1 |
| <i>circC16orf62</i> | miR-3912-5p      | 2 |
| <i>circC16orf62</i> | miR-3913-3p      | 3 |
| <i>circC16orf62</i> | miR-3922-5p      | 5 |
| <i>circC16orf62</i> | miR-3927-5p      | 1 |
| <i>circC16orf62</i> | miR-3928-3p      | 2 |
| <i>circC16orf62</i> | miR-3936         | 4 |
| <i>circC16orf62</i> | miR-3938         | 1 |
| <i>circC16orf62</i> | miR-3940-3p      | 2 |
| <i>circC16orf62</i> | miR-3945         | 4 |
| <i>circC16orf62</i> | miR-3978         | 1 |
| <i>circC16orf62</i> | miR-424-3p       | 2 |
| <i>circC16orf62</i> | miR-4251         | 2 |
| <i>circC16orf62</i> | miR-4253/6862-5p | 4 |
| <i>circC16orf62</i> | miR-4260         | 1 |
| <i>circC16orf62</i> | miR-4261         | 3 |
| <i>circC16orf62</i> | miR-4264         | 1 |



|                     |                                              |   |
|---------------------|----------------------------------------------|---|
| <i>circC16orf62</i> | miR-4266                                     | 3 |
| <i>circC16orf62</i> | miR-4271/4725-3p/6780b-5p                    | 2 |
| <i>circC16orf62</i> | miR-4272                                     | 3 |
| <i>circC16orf62</i> | miR-4273/7156-5p                             | 1 |
| <i>circC16orf62</i> | miR-4281                                     | 1 |
| <i>circC16orf62</i> | miR-4282                                     | 2 |
| <i>circC16orf62</i> | miR-4283                                     | 2 |
| <i>circC16orf62</i> | miR-4289                                     | 2 |
| <i>circC16orf62</i> | miR-4290                                     | 2 |
| <i>circC16orf62</i> | miR-4291                                     | 3 |
| <i>circC16orf62</i> | miR-4294                                     | 1 |
| <i>circC16orf62</i> | miR-4302                                     | 1 |
| <i>circC16orf62</i> | miR-4310/7157-5p                             | 1 |
| <i>circC16orf62</i> | miR-432-5p                                   | 5 |
| <i>circC16orf62</i> | miR-4325                                     | 4 |
| <i>circC16orf62</i> | miR-4327                                     | 1 |
| <i>circC16orf62</i> | miR-4328                                     | 1 |
| <i>circC16orf62</i> | miR-4329                                     | 2 |
| <i>circC16orf62</i> | miR-433-3p                                   | 1 |
| <i>circC16orf62</i> | miR-4330                                     | 1 |
| <i>circC16orf62</i> | miR-4423-3p                                  | 2 |
| <i>circC16orf62</i> | miR-4423-5p                                  | 2 |
| <i>circC16orf62</i> | miR-4426/4647/4662b                          | 6 |
| <i>circC16orf62</i> | miR-4428                                     | 1 |
| <i>circC16orf62</i> | miR-4433a-3p                                 | 3 |
| <i>circC16orf62</i> | miR-4436b-3p/4632-5p/6735-5p/6879-5p/7843-5p | 7 |
| <i>circC16orf62</i> | miR-4436b-5p                                 | 5 |
| <i>circC16orf62</i> | miR-4437                                     | 2 |
| <i>circC16orf62</i> | miR-4459                                     | 3 |
| <i>circC16orf62</i> | miR-4470                                     | 1 |
| <i>circC16orf62</i> | miR-4477a                                    | 3 |
| <i>circC16orf62</i> | miR-4480                                     | 3 |
| <i>circC16orf62</i> | miR-4482-3p                                  | 2 |
| <i>circC16orf62</i> | miR-4485-3p                                  | 1 |
| <i>circC16orf62</i> | miR-4486                                     | 1 |
| <i>circC16orf62</i> | miR-4489                                     | 2 |
| <i>circC16orf62</i> | miR-4493                                     | 2 |
| <i>circC16orf62</i> | miR-4494                                     | 1 |

|                     |                          |   |
|---------------------|--------------------------|---|
| <i>circC16orf62</i> | miR-4502                 | 1 |
| <i>circC16orf62</i> | miR-4506                 | 2 |
| <i>circC16orf62</i> | miR-450a-2-3p            | 1 |
| <i>circC16orf62</i> | miR-450b-5p              | 1 |
| <i>circC16orf62</i> | miR-4511                 | 3 |
| <i>circC16orf62</i> | miR-4517                 | 3 |
| <i>circC16orf62</i> | miR-4520-2-3p            | 4 |
| <i>circC16orf62</i> | miR-4524a-3p             | 2 |
| <i>circC16orf62</i> | miR-4524b-3p             | 5 |
| <i>circC16orf62</i> | miR-4529-3p              | 4 |
| <i>circC16orf62</i> | miR-4533                 | 2 |
| <i>circC16orf62</i> | miR-4534/8082            | 1 |
| <i>circC16orf62</i> | miR-4535                 | 8 |
| <i>circC16orf62</i> | miR-4540                 | 2 |
| <i>circC16orf62</i> | miR-455-5p               | 2 |
| <i>circC16orf62</i> | miR-4633-3p/6500-5p      | 5 |
| <i>circC16orf62</i> | miR-4635                 | 2 |
| <i>circC16orf62</i> | miR-4637                 | 1 |
| <i>circC16orf62</i> | miR-4638-3p              | 5 |
| <i>circC16orf62</i> | miR-4645-3p              | 2 |
| <i>circC16orf62</i> | miR-4650-5p              | 4 |
| <i>circC16orf62</i> | miR-4655-3p              | 1 |
| <i>circC16orf62</i> | miR-4655-5p              | 1 |
| <i>circC16orf62</i> | miR-4656                 | 1 |
| <i>circC16orf62</i> | miR-4658/6790-5p         | 1 |
| <i>circC16orf62</i> | miR-4659a-3p/4659b-3p    | 1 |
| <i>circC16orf62</i> | miR-466                  | 1 |
| <i>circC16orf62</i> | miR-4661-3p              | 2 |
| <i>circC16orf62</i> | miR-4666a-3p             | 1 |
| <i>circC16orf62</i> | miR-4666b                | 2 |
| <i>circC16orf62</i> | miR-4667-5p/4700-5p/8089 | 2 |
| <i>circC16orf62</i> | miR-4668-5p              | 2 |
| <i>circC16orf62</i> | miR-4674                 | 1 |
| <i>circC16orf62</i> | miR-4675/4741            | 1 |
| <i>circC16orf62</i> | miR-4677-5p              | 1 |
| <i>circC16orf62</i> | miR-4683                 | 4 |
| <i>circC16orf62</i> | miR-4684-5p              | 1 |
| <i>circC16orf62</i> | miR-4686                 | 1 |

|                     |                             |   |
|---------------------|-----------------------------|---|
| <i>circC16orf62</i> | miR-4687-3p                 | 1 |
| <i>circC16orf62</i> | miR-4687-5p                 | 2 |
| <i>circC16orf62</i> | miR-4688/6743-5p            | 1 |
| <i>circC16orf62</i> | miR-4690-3p/5685            | 2 |
| <i>circC16orf62</i> | miR-4694-5p                 | 1 |
| <i>circC16orf62</i> | miR-4695-5p                 | 3 |
| <i>circC16orf62</i> | miR-4698                    | 2 |
| <i>circC16orf62</i> | miR-4699-5p                 | 5 |
| <i>circC16orf62</i> | miR-4704-3p                 | 1 |
| <i>circC16orf62</i> | miR-4708-5p                 | 6 |
| <i>circC16orf62</i> | miR-4710                    | 1 |
| <i>circC16orf62</i> | miR-4714-5p                 | 1 |
| <i>circC16orf62</i> | miR-4719                    | 2 |
| <i>circC16orf62</i> | miR-4720-5p/4799-3p/5588-5p | 2 |
| <i>circC16orf62</i> | miR-4727-5p                 | 3 |
| <i>circC16orf62</i> | miR-4733-3p                 | 4 |
| <i>circC16orf62</i> | miR-4736                    | 4 |
| <i>circC16orf62</i> | miR-4738-3p                 | 2 |
| <i>circC16orf62</i> | miR-4753-3p                 | 2 |
| <i>circC16orf62</i> | miR-4753-5p                 | 2 |
| <i>circC16orf62</i> | miR-4760-3p                 | 2 |
| <i>circC16orf62</i> | miR-4761-3p                 | 2 |
| <i>circC16orf62</i> | miR-4762-3p                 | 1 |
| <i>circC16orf62</i> | miR-4765                    | 1 |
| <i>circC16orf62</i> | miR-4768-3p                 | 3 |
| <i>circC16orf62</i> | miR-4769-3p/6817-5p         | 1 |
| <i>circC16orf62</i> | miR-4771                    | 2 |
| <i>circC16orf62</i> | miR-4772-5p                 | 1 |
| <i>circC16orf62</i> | miR-4773                    | 2 |
| <i>circC16orf62</i> | miR-4776-5p                 | 8 |
| <i>circC16orf62</i> | miR-4777-3p                 | 1 |
| <i>circC16orf62</i> | miR-4779                    | 3 |
| <i>circC16orf62</i> | miR-4782-5p/5706            | 7 |
| <i>circC16orf62</i> | miR-4786-3p                 | 1 |
| <i>circC16orf62</i> | miR-4787-5p                 | 3 |
| <i>circC16orf62</i> | miR-4789-5p                 | 1 |
| <i>circC16orf62</i> | miR-4790-3p                 | 1 |
| <i>circC16orf62</i> | miR-4792                    | 1 |

|                     |                     |   |
|---------------------|---------------------|---|
| <i>circC16orf62</i> | miR-4795-3p         | 1 |
| <i>circC16orf62</i> | miR-4795-5p         | 2 |
| <i>circC16orf62</i> | miR-4797-3p         | 1 |
| <i>circC16orf62</i> | miR-4797-5p         | 2 |
| <i>circC16orf62</i> | miR-4802-5p         | 1 |
| <i>circC16orf62</i> | miR-4803            | 2 |
| <i>circC16orf62</i> | miR-483-3p.2        | 4 |
| <i>circC16orf62</i> | miR-486-3p          | 3 |
| <i>circC16orf62</i> | miR-490-5p          | 1 |
| <i>circC16orf62</i> | miR-493-3p          | 2 |
| <i>circC16orf62</i> | miR-497-3p          | 2 |
| <i>circC16orf62</i> | miR-498             | 3 |
| <i>circC16orf62</i> | miR-499a-3p/499b-3p | 2 |
| <i>circC16orf62</i> | miR-499b-5p         | 1 |
| <i>circC16orf62</i> | miR-5001-3p         | 3 |
| <i>circC16orf62</i> | miR-5004-3p         | 1 |
| <i>circC16orf62</i> | miR-5009-5p/8058    | 1 |
| <i>circC16orf62</i> | miR-501-3p/502-3p   | 4 |
| <i>circC16orf62</i> | miR-5011-3p         | 2 |
| <i>circC16orf62</i> | miR-5011-5p         | 2 |
| <i>circC16orf62</i> | miR-502-5p          | 5 |
| <i>circC16orf62</i> | miR-505-5p          | 2 |
| <i>circC16orf62</i> | miR-507/557         | 1 |
| <i>circC16orf62</i> | miR-508-5p          | 2 |
| <i>circC16orf62</i> | miR-5087            | 1 |
| <i>circC16orf62</i> | miR-5088-3p         | 1 |
| <i>circC16orf62</i> | miR-511-5p          | 2 |
| <i>circC16orf62</i> | miR-512-5p          | 5 |
| <i>circC16orf62</i> | miR-513c-5p/514b-5p | 1 |
| <i>circC16orf62</i> | miR-514a-5p         | 1 |
| <i>circC16orf62</i> | miR-516b-5p         | 7 |
| <i>circC16orf62</i> | miR-518c-5p         | 2 |
| <i>circC16orf62</i> | miR-5190            | 1 |
| <i>circC16orf62</i> | miR-5197-3p         | 1 |
| <i>circC16orf62</i> | miR-521             | 1 |
| <i>circC16orf62</i> | miR-524-3p/525-3p   | 1 |
| <i>circC16orf62</i> | miR-526b-5p         | 1 |
| <i>circC16orf62</i> | miR-542-5p          | 3 |

|                     |                                      |   |
|---------------------|--------------------------------------|---|
| <i>circC16orf62</i> | miR-548ad-3p                         | 2 |
| <i>circC16orf62</i> | miR-548aj-5p/548f-5p/548g-5p/548x-5p | 3 |
| <i>circC16orf62</i> | miR-548al/4445-3p                    | 1 |
| <i>circC16orf62</i> | miR-548av-3p                         | 2 |
| <i>circC16orf62</i> | miR-548az-5p/548t-5p                 | 1 |
| <i>circC16orf62</i> | miR-548b-3p                          | 3 |
| <i>circC16orf62</i> | miR-548e-5p                          | 2 |
| <i>circC16orf62</i> | miR-548n                             | 1 |
| <i>circC16orf62</i> | miR-551-3p                           | 1 |
| <i>circC16orf62</i> | miR-553                              | 2 |
| <i>circC16orf62</i> | miR-556-5p                           | 2 |
| <i>circC16orf62</i> | miR-5571-3p                          | 3 |
| <i>circC16orf62</i> | miR-5572                             | 1 |
| <i>circC16orf62</i> | miR-5580-5p                          | 2 |
| <i>circC16orf62</i> | miR-5581-3p                          | 5 |
| <i>circC16orf62</i> | miR-5583-3p                          | 3 |
| <i>circC16orf62</i> | miR-5591-3p                          | 1 |
| <i>circC16orf62</i> | miR-5680                             | 3 |
| <i>circC16orf62</i> | miR-5681b                            | 1 |
| <i>circC16orf62</i> | miR-5682                             | 1 |
| <i>circC16orf62</i> | miR-5692a                            | 1 |
| <i>circC16orf62</i> | miR-5700                             | 4 |
| <i>circC16orf62</i> | miR-5705                             | 1 |
| <i>circC16orf62</i> | miR-5708                             | 1 |
| <i>circC16orf62</i> | miR-573/3616-5p                      | 2 |
| <i>circC16orf62</i> | miR-576-3p                           | 1 |
| <i>circC16orf62</i> | miR-581                              | 2 |
| <i>circC16orf62</i> | miR-582-5p                           | 3 |
| <i>circC16orf62</i> | miR-585-5p                           | 1 |
| <i>circC16orf62</i> | miR-586                              | 3 |
| <i>circC16orf62</i> | miR-597-3p                           | 6 |
| <i>circC16orf62</i> | miR-605-3p                           | 2 |
| <i>circC16orf62</i> | miR-606                              | 1 |
| <i>circC16orf62</i> | miR-6068                             | 1 |
| <i>circC16orf62</i> | miR-6069                             | 1 |
| <i>circC16orf62</i> | miR-6071                             | 1 |
| <i>circC16orf62</i> | miR-6077                             | 3 |
| <i>circC16orf62</i> | miR-6079                             | 4 |

|                     |                                      |   |
|---------------------|--------------------------------------|---|
| <i>circC16orf62</i> | miR-6085/6813-5p                     | 1 |
| <i>circC16orf62</i> | miR-612/1285-3p/3187-5p/5189-5p/6860 | 1 |
| <i>circC16orf62</i> | miR-6124                             | 1 |
| <i>circC16orf62</i> | miR-6125                             | 2 |
| <i>circC16orf62</i> | miR-6126                             | 1 |
| <i>circC16orf62</i> | miR-6128                             | 4 |
| <i>circC16orf62</i> | miR-6131                             | 5 |
| <i>circC16orf62</i> | miR-6132/6836-5p                     | 1 |
| <i>circC16orf62</i> | miR-621                              | 1 |
| <i>circC16orf62</i> | miR-622                              | 3 |
| <i>circC16orf62</i> | miR-625-3p                           | 1 |
| <i>circC16orf62</i> | miR-626/6876-3p                      | 3 |
| <i>circC16orf62</i> | miR-630                              | 2 |
| <i>circC16orf62</i> | miR-631/3661                         | 1 |
| <i>circC16orf62</i> | miR-634                              | 4 |
| <i>circC16orf62</i> | miR-637                              | 2 |
| <i>circC16orf62</i> | miR-644a                             | 1 |
| <i>circC16orf62</i> | miR-6501-3p                          | 3 |
| <i>circC16orf62</i> | miR-6501-5p                          | 2 |
| <i>circC16orf62</i> | miR-6503-3p                          | 2 |
| <i>circC16orf62</i> | miR-6506-3p                          | 4 |
| <i>circC16orf62</i> | miR-6509-3p                          | 5 |
| <i>circC16orf62</i> | miR-6509-5p                          | 1 |
| <i>circC16orf62</i> | miR-6512-5p                          | 1 |
| <i>circC16orf62</i> | miR-6513-3p                          | 2 |
| <i>circC16orf62</i> | miR-6514-5p                          | 1 |
| <i>circC16orf62</i> | miR-6516-3p                          | 1 |
| <i>circC16orf62</i> | miR-653-5p                           | 1 |
| <i>circC16orf62</i> | miR-662                              | 1 |
| <i>circC16orf62</i> | miR-663b                             | 1 |
| <i>circC16orf62</i> | miR-668-3p                           | 3 |
| <i>circC16orf62</i> | miR-6715a-3p                         | 2 |
| <i>circC16orf62</i> | miR-6715b-3p                         | 1 |
| <i>circC16orf62</i> | miR-6717-5p                          | 2 |
| <i>circC16orf62</i> | miR-6721-5p                          | 1 |
| <i>circC16orf62</i> | miR-6723-5p                          | 2 |
| <i>circC16orf62</i> | miR-6727-5p                          | 3 |
| <i>circC16orf62</i> | miR-6728-3p                          | 2 |

|                     |                     |   |
|---------------------|---------------------|---|
| <i>circC16orf62</i> | miR-6733-3p         | 1 |
| <i>circC16orf62</i> | miR-6734-3p         | 2 |
| <i>circC16orf62</i> | miR-6735-3p         | 3 |
| <i>circC16orf62</i> | miR-6739-3p         | 1 |
| <i>circC16orf62</i> | miR-6740-3p         | 1 |
| <i>circC16orf62</i> | miR-6748-5p         | 1 |
| <i>circC16orf62</i> | miR-6750-3p         | 4 |
| <i>circC16orf62</i> | miR-6758-3p         | 1 |
| <i>circC16orf62</i> | miR-6759-3p         | 2 |
| <i>circC16orf62</i> | miR-676-5p          | 3 |
| <i>circC16orf62</i> | miR-6761-5p         | 2 |
| <i>circC16orf62</i> | miR-6764-3p/6824-3p | 2 |
| <i>circC16orf62</i> | miR-6765-3p         | 2 |
| <i>circC16orf62</i> | miR-6770-5p         | 2 |
| <i>circC16orf62</i> | miR-6773-3p         | 3 |
| <i>circC16orf62</i> | miR-6774-3p         | 1 |
| <i>circC16orf62</i> | miR-6776-3p         | 1 |
| <i>circC16orf62</i> | miR-6777-3p         | 4 |
| <i>circC16orf62</i> | miR-6779-3p         | 2 |
| <i>circC16orf62</i> | miR-6783-5p         | 4 |
| <i>circC16orf62</i> | miR-6793-5p         | 1 |
| <i>circC16orf62</i> | miR-6796-3p         | 2 |
| <i>circC16orf62</i> | miR-6800-3p         | 2 |
| <i>circC16orf62</i> | miR-6801-5p         | 2 |
| <i>circC16orf62</i> | miR-6803-3p         | 1 |
| <i>circC16orf62</i> | miR-6809-5p         | 1 |
| <i>circC16orf62</i> | miR-6810-5p         | 2 |
| <i>circC16orf62</i> | miR-6813-3p         | 3 |
| <i>circC16orf62</i> | miR-6817-3p         | 2 |
| <i>circC16orf62</i> | miR-6818-5p         | 1 |
| <i>circC16orf62</i> | miR-6822-3p         | 2 |
| <i>circC16orf62</i> | miR-6825-5p         | 3 |
| <i>circC16orf62</i> | miR-6826-3p         | 1 |
| <i>circC16orf62</i> | miR-6828-3p         | 1 |
| <i>circC16orf62</i> | miR-6829-5p         | 1 |
| <i>circC16orf62</i> | miR-6834-3p         | 1 |
| <i>circC16orf62</i> | miR-6838-3p         | 2 |
| <i>circC16orf62</i> | miR-6846-5p/6848-5p | 3 |

|                     |                           |   |
|---------------------|---------------------------|---|
| <i>circC16orf62</i> | miR-6847-3p               | 2 |
| <i>circC16orf62</i> | miR-6850-3p               | 1 |
| <i>circC16orf62</i> | miR-6851-3p               | 1 |
| <i>circC16orf62</i> | miR-6854-5p               | 2 |
| <i>circC16orf62</i> | miR-6857-5p               | 2 |
| <i>circC16orf62</i> | miR-6864-5p               | 1 |
| <i>circC16orf62</i> | miR-6868-5p               | 2 |
| <i>circC16orf62</i> | miR-6869-5p               | 2 |
| <i>circC16orf62</i> | miR-6870-3p               | 3 |
| <i>circC16orf62</i> | miR-6871-5p               | 4 |
| <i>circC16orf62</i> | miR-6874-5p               | 2 |
| <i>circC16orf62</i> | miR-6875-3p               | 1 |
| <i>circC16orf62</i> | miR-6879-3p               | 2 |
| <i>circC16orf62</i> | miR-6888-5p               | 4 |
| <i>circC16orf62</i> | miR-6892-3p               | 1 |
| <i>circC16orf62</i> | miR-6894-5p               | 3 |
| <i>circC16orf62</i> | miR-7-5p                  | 3 |
| <i>circC16orf62</i> | miR-7110-3p               | 2 |
| <i>circC16orf62</i> | miR-7151-5p               | 4 |
| <i>circC16orf62</i> | miR-7154-3p               | 3 |
| <i>circC16orf62</i> | miR-7154-5p               | 1 |
| <i>circC16orf62</i> | miR-7155-5p               | 2 |
| <i>circC16orf62</i> | miR-7158-3p               | 5 |
| <i>circC16orf62</i> | miR-7159-3p               | 2 |
| <i>circC16orf62</i> | miR-759                   | 1 |
| <i>circC16orf62</i> | miR-760                   | 2 |
| <i>circC16orf62</i> | miR-762/4492/4498/5001-5p | 1 |
| <i>circC16orf62</i> | miR-765                   | 3 |
| <i>circC16orf62</i> | miR-766-5p                | 3 |
| <i>circC16orf62</i> | miR-767-3p                | 1 |
| <i>circC16orf62</i> | miR-7703                  | 4 |
| <i>circC16orf62</i> | miR-7705                  | 1 |
| <i>circC16orf62</i> | miR-7843-3p               | 3 |
| <i>circC16orf62</i> | miR-7849-3p               | 1 |
| <i>circC16orf62</i> | miR-7850-5p               | 2 |
| <i>circC16orf62</i> | miR-7855-5p               | 2 |
| <i>circC16orf62</i> | miR-7974                  | 1 |
| <i>circC16orf62</i> | miR-7975                  | 3 |



|                     |                     |   |
|---------------------|---------------------|---|
| <i>circC16orf62</i> | miR-7976            | 1 |
| <i>circC16orf62</i> | miR-8053            | 2 |
| <i>circC16orf62</i> | miR-8060            | 5 |
| <i>circC16orf62</i> | miR-8062            | 3 |
| <i>circC16orf62</i> | miR-8063            | 2 |
| <i>circC16orf62</i> | miR-8064            | 2 |
| <i>circC16orf62</i> | miR-8065            | 4 |
| <i>circC16orf62</i> | miR-8068            | 1 |
| <i>circC16orf62</i> | miR-8084            | 1 |
| <i>circC16orf62</i> | miR-8088            | 2 |
| <i>circC16orf62</i> | miR-873-3p          | 1 |
| <i>circC16orf62</i> | miR-875-5p          | 1 |
| <i>circC16orf62</i> | miR-877-3p          | 2 |
| <i>circC16orf62</i> | miR-887-3p          | 1 |
| <i>circC16orf62</i> | miR-888-5p          | 1 |
| <i>circC16orf62</i> | miR-921             | 2 |
| <i>circC16orf62</i> | miR-922             | 2 |
| <i>circC16orf62</i> | miR-936             | 2 |
| <i>circC16orf62</i> | miR-939-5p/1343-5p  | 3 |
| <i>circC16orf62</i> | miR-944             | 2 |
| <i>circC16orf62</i> | miR-95-5p           | 2 |
| <i>circC16orf62</i> | miR-99-3p           | 2 |
| <i>circC16orf62</i> | miR-1249-5p/6797-5p | 1 |
| <i>circC16orf62</i> | miR-1538/4745-3p    | 1 |
| <i>circC16orf62</i> | miR-185-5p          | 2 |
| <i>circC16orf62</i> | miR-29a-5p          | 1 |
| <i>circC16orf62</i> | miR-3120-5p         | 2 |
| <i>circC16orf62</i> | miR-3611            | 1 |
| <i>circC16orf62</i> | miR-3655            | 1 |
| <i>circC16orf62</i> | miR-3687/4442       | 1 |
| <i>circC16orf62</i> | miR-423-5p          | 1 |
| <i>circC16orf62</i> | miR-4274            | 1 |
| <i>circC16orf62</i> | miR-4461            | 1 |
| <i>circC16orf62</i> | miR-4519            | 1 |
| <i>circC16orf62</i> | miR-4685-5p/6837-5p | 1 |
| <i>circC16orf62</i> | miR-4704-5p         | 1 |
| <i>circC16orf62</i> | miR-4707-3p         | 1 |
| <i>circC16orf62</i> | miR-5003-3p         | 1 |

|                     |                       |   |
|---------------------|-----------------------|---|
| <i>circC16orf62</i> | miR-504-3p            | 1 |
| <i>circC16orf62</i> | miR-515-5p/519e-5p    | 1 |
| <i>circC16orf62</i> | miR-5189-3p           | 1 |
| <i>circC16orf62</i> | miR-5192              | 2 |
| <i>circC16orf62</i> | miR-5194              | 1 |
| <i>circC16orf62</i> | miR-578               | 1 |
| <i>circC16orf62</i> | miR-671-3p            | 1 |
| <i>circC16orf62</i> | miR-6731-5p/8085      | 1 |
| <i>circC16orf62</i> | miR-6818-3p           | 1 |
| <i>circC16orf62</i> | miR-6863              | 1 |
| <i>circC16orf62</i> | miR-6878-5p           | 1 |
| <i>circC16orf62</i> | miR-7113-5p           | 1 |
| <i>circC16orf62</i> | miR-8069              | 1 |
| <i>circC16orf62</i> | miR-1180-3p           | 1 |
| <i>circC16orf62</i> | miR-1233-5p/6778-5p   | 1 |
| <i>circC16orf62</i> | miR-1238-3p           | 1 |
| <i>circC16orf62</i> | miR-1252-5p           | 1 |
| <i>circC16orf62</i> | miR-1273g-5p          | 1 |
| <i>circC16orf62</i> | miR-1273h-3p          | 1 |
| <i>circC16orf62</i> | miR-1286              | 2 |
| <i>circC16orf62</i> | miR-1290              | 1 |
| <i>circC16orf62</i> | miR-140-5p            | 1 |
| <i>circC16orf62</i> | miR-153-3p            | 1 |
| <i>circC16orf62</i> | miR-16-2-3p/195-3p    | 1 |
| <i>circC16orf62</i> | miR-185-3p            | 1 |
| <i>circC16orf62</i> | miR-203a-5p           | 1 |
| <i>circC16orf62</i> | miR-214-5p            | 1 |
| <i>circC16orf62</i> | miR-2355-3p           | 1 |
| <i>circC16orf62</i> | miR-25-5p             | 1 |
| <i>circC16orf62</i> | miR-302a-5p           | 1 |
| <i>circC16orf62</i> | miR-302f              | 1 |
| <i>circC16orf62</i> | miR-3065-5p           | 1 |
| <i>circC16orf62</i> | miR-3125/3916/6859-5p | 2 |
| <i>circC16orf62</i> | miR-3150b-3p          | 1 |
| <i>circC16orf62</i> | miR-3154              | 2 |
| <i>circC16orf62</i> | miR-3160-3p           | 1 |
| <i>circC16orf62</i> | miR-3180-5p           | 1 |
| <i>circC16orf62</i> | miR-338-3p            | 1 |

|                     |                     |   |
|---------------------|---------------------|---|
| <i>circC16orf62</i> | miR-3653-3p         | 1 |
| <i>circC16orf62</i> | miR-3657            | 1 |
| <i>circC16orf62</i> | miR-3658            | 1 |
| <i>circC16orf62</i> | miR-3678-3p         | 1 |
| <i>circC16orf62</i> | miR-3682-3p         | 1 |
| <i>circC16orf62</i> | miR-382-3p          | 2 |
| <i>circC16orf62</i> | miR-3914            | 2 |
| <i>circC16orf62</i> | miR-3934-3p         | 1 |
| <i>circC16orf62</i> | miR-3935            | 1 |
| <i>circC16orf62</i> | miR-4257            | 1 |
| <i>circC16orf62</i> | miR-4305            | 1 |
| <i>circC16orf62</i> | miR-4321            | 2 |
| <i>circC16orf62</i> | miR-4433b-3p        | 1 |
| <i>circC16orf62</i> | miR-4434/4516/5703  | 1 |
| <i>circC16orf62</i> | miR-4453/4538       | 1 |
| <i>circC16orf62</i> | miR-4454            | 1 |
| <i>circC16orf62</i> | miR-448             | 1 |
| <i>circC16orf62</i> | miR-4487            | 1 |
| <i>circC16orf62</i> | miR-4522            | 1 |
| <i>circC16orf62</i> | miR-4530            | 1 |
| <i>circC16orf62</i> | miR-4536-5p         | 1 |
| <i>circC16orf62</i> | miR-4646-3p         | 1 |
| <i>circC16orf62</i> | miR-4648            | 1 |
| <i>circC16orf62</i> | miR-4654/4769-5p    | 1 |
| <i>circC16orf62</i> | miR-4664-3p         | 1 |
| <i>circC16orf62</i> | miR-4669            | 1 |
| <i>circC16orf62</i> | miR-4690-5p         | 1 |
| <i>circC16orf62</i> | miR-4711-5p         | 1 |
| <i>circC16orf62</i> | miR-4722-5p         | 2 |
| <i>circC16orf62</i> | miR-4730            | 1 |
| <i>circC16orf62</i> | miR-4747-5p/5196-5p | 1 |
| <i>circC16orf62</i> | miR-4754            | 1 |
| <i>circC16orf62</i> | miR-4764-5p         | 1 |
| <i>circC16orf62</i> | miR-4783-3p         | 1 |
| <i>circC16orf62</i> | miR-4796-5p         | 1 |
| <i>circC16orf62</i> | miR-486-5p          | 1 |
| <i>circC16orf62</i> | miR-495-3p          | 2 |
| <i>circC16orf62</i> | miR-5000-3p         | 2 |

|                     |                              |   |
|---------------------|------------------------------|---|
| <i>circC16orf62</i> | miR-5091                     | 2 |
| <i>circC16orf62</i> | miR-510-3p                   | 1 |
| <i>circC16orf62</i> | miR-548ai/548ag/548ba/570-5p | 1 |
| <i>circC16orf62</i> | miR-548m                     | 1 |
| <i>circC16orf62</i> | miR-558                      | 1 |
| <i>circC16orf62</i> | miR-562                      | 1 |
| <i>circC16orf62</i> | miR-5739                     | 2 |
| <i>circC16orf62</i> | miR-6165                     | 1 |
| <i>circC16orf62</i> | miR-639                      | 1 |
| <i>circC16orf62</i> | miR-6510-5p                  | 1 |
| <i>circC16orf62</i> | miR-652-3p                   | 1 |
| <i>circC16orf62</i> | miR-656-3p                   | 1 |
| <i>circC16orf62</i> | miR-658                      | 2 |
| <i>circC16orf62</i> | miR-670-3p                   | 1 |
| <i>circC16orf62</i> | miR-671-5p                   | 2 |
| <i>circC16orf62</i> | miR-6755-3p                  | 1 |
| <i>circC16orf62</i> | miR-676-3p                   | 2 |
| <i>circC16orf62</i> | miR-6770-3p                  | 1 |
| <i>circC16orf62</i> | miR-6785-3p                  | 1 |
| <i>circC16orf62</i> | miR-6811-3p                  | 1 |
| <i>circC16orf62</i> | miR-6828-5p                  | 2 |
| <i>circC16orf62</i> | miR-6846-3p                  | 1 |
| <i>circC16orf62</i> | miR-6847-5p                  | 1 |
| <i>circC16orf62</i> | miR-6850-5p                  | 1 |
| <i>circC16orf62</i> | miR-6859-3p                  | 1 |
| <i>circC16orf62</i> | miR-6873-3p                  | 1 |
| <i>circC16orf62</i> | miR-711                      | 1 |
| <i>circC16orf62</i> | miR-7112-3p                  | 1 |
| <i>circC16orf62</i> | miR-7846-3p                  | 1 |
| <i>circC16orf62</i> | miR-873-5p.2                 | 2 |
| <i>circC16orf62</i> | miR-876-5p                   | 1 |
| <i>circC16orf62</i> | miR-9-5p                     | 2 |
| <i>circC16orf62</i> | miR-941                      | 1 |
| <i>circC1orf27</i>  | let-7d-3p                    | 3 |
| <i>circC1orf27</i>  | let-7e-3p                    | 3 |
| <i>circC1orf27</i>  | miR-1-5p                     | 2 |
| <i>circC1orf27</i>  | miR-100-3p                   | 2 |
| <i>circC1orf27</i>  | miR-101-3p.2                 | 4 |

|                    |                                    |   |
|--------------------|------------------------------------|---|
| <i>circC1orf27</i> | miR-103-3p/107                     | 7 |
| <i>circC1orf27</i> | miR-106a-3p                        | 4 |
| <i>circC1orf27</i> | miR-1183                           | 3 |
| <i>circC1orf27</i> | miR-1199-5p/6751-3p                | 2 |
| <i>circC1orf27</i> | miR-1206                           | 4 |
| <i>circC1orf27</i> | miR-1207-3p                        | 2 |
| <i>circC1orf27</i> | miR-1228-3p                        | 6 |
| <i>circC1orf27</i> | miR-1236-3p                        | 2 |
| <i>circC1orf27</i> | miR-1238-3p                        | 1 |
| <i>circC1orf27</i> | miR-1247-3p                        | 1 |
| <i>circC1orf27</i> | miR-125-5p                         | 1 |
| <i>circC1orf27</i> | miR-1250-3p                        | 9 |
| <i>circC1orf27</i> | miR-1257                           | 1 |
| <i>circC1orf27</i> | miR-127-5p                         | 4 |
| <i>circC1orf27</i> | miR-1288-3p                        | 3 |
| <i>circC1orf27</i> | miR-1292-5p                        | 1 |
| <i>circC1orf27</i> | miR-1305                           | 6 |
| <i>circC1orf27</i> | miR-1306-3p                        | 1 |
| <i>circC1orf27</i> | miR-133a-3p.1                      | 1 |
| <i>circC1orf27</i> | miR-135b-3p                        | 2 |
| <i>circC1orf27</i> | miR-136-3p                         | 1 |
| <i>circC1orf27</i> | miR-136-5p                         | 1 |
| <i>circC1orf27</i> | miR-138-2-3p                       | 2 |
| <i>circC1orf27</i> | miR-139-3p                         | 3 |
| <i>circC1orf27</i> | miR-141-5p                         | 3 |
| <i>circC1orf27</i> | miR-142-5p                         | 2 |
| <i>circC1orf27</i> | miR-147a                           | 1 |
| <i>circC1orf27</i> | miR-149-3p/4728-5p/6785-5p/6883-5p | 1 |
| <i>circC1orf27</i> | miR-155-3p                         | 4 |
| <i>circC1orf27</i> | miR-181-3p/4420                    | 7 |
| <i>circC1orf27</i> | miR-183-3p                         | 8 |
| <i>circC1orf27</i> | miR-185-3p                         | 1 |
| <i>circC1orf27</i> | miR-186-5p                         | 1 |
| <i>circC1orf27</i> | miR-19-5p                          | 5 |
| <i>circC1orf27</i> | miR-190a-3p                        | 3 |
| <i>circC1orf27</i> | miR-194-3p                         | 1 |
| <i>circC1orf27</i> | miR-197-3p                         | 1 |
| <i>circC1orf27</i> | miR-202-5p                         | 1 |

|                    |                           |   |
|--------------------|---------------------------|---|
| <i>circC1orf27</i> | miR-2052                  | 5 |
| <i>circC1orf27</i> | miR-2053                  | 6 |
| <i>circC1orf27</i> | miR-2054                  | 1 |
| <i>circC1orf27</i> | miR-208-5p                | 4 |
| <i>circC1orf27</i> | miR-211-3p                | 3 |
| <i>circC1orf27</i> | miR-2115-5p               | 4 |
| <i>circC1orf27</i> | miR-2116-5p               | 3 |
| <i>circC1orf27</i> | miR-217                   | 5 |
| <i>circC1orf27</i> | miR-219a-2-3p             | 1 |
| <i>circC1orf27</i> | miR-219b-3p               | 1 |
| <i>circC1orf27</i> | miR-22-5p                 | 3 |
| <i>circC1orf27</i> | miR-2276-3p               | 8 |
| <i>circC1orf27</i> | miR-2355-3p               | 2 |
| <i>circC1orf27</i> | miR-26-3p                 | 2 |
| <i>circC1orf27</i> | miR-27b-5p                | 1 |
| <i>circC1orf27</i> | miR-28-3p                 | 2 |
| <i>circC1orf27</i> | miR-29a-5p                | 7 |
| <i>circC1orf27</i> | miR-29b-1-5p              | 5 |
| <i>circC1orf27</i> | miR-302b-5p/302d-5p       | 2 |
| <i>circC1orf27</i> | miR-302c-5p               | 4 |
| <i>circC1orf27</i> | miR-302f                  | 1 |
| <i>circC1orf27</i> | miR-3121-5p               | 1 |
| <i>circC1orf27</i> | miR-3124-3p               | 2 |
| <i>circC1orf27</i> | miR-3133                  | 1 |
| <i>circC1orf27</i> | miR-3143                  | 8 |
| <i>circC1orf27</i> | miR-3159                  | 3 |
| <i>circC1orf27</i> | miR-3163                  | 5 |
| <i>circC1orf27</i> | miR-3169                  | 4 |
| <i>circC1orf27</i> | miR-3173-3p/6891-5p       | 3 |
| <i>circC1orf27</i> | miR-3179                  | 1 |
| <i>circC1orf27</i> | miR-3185                  | 3 |
| <i>circC1orf27</i> | miR-32-3p                 | 3 |
| <i>circC1orf27</i> | miR-3202                  | 1 |
| <i>circC1orf27</i> | miR-320e                  | 2 |
| <i>circC1orf27</i> | miR-323-3p                | 3 |
| <i>circC1orf27</i> | miR-323b-5p/410-5p/494-5p | 4 |
| <i>circC1orf27</i> | miR-335-3p                | 5 |
| <i>circC1orf27</i> | miR-340-5p                | 2 |

|                    |                           |   |
|--------------------|---------------------------|---|
| <i>circC1orf27</i> | miR-345-5p                | 1 |
| <i>circC1orf27</i> | miR-34b-3p                | 3 |
| <i>circC1orf27</i> | miR-34c-3p                | 3 |
| <i>circC1orf27</i> | miR-3529-3p               | 2 |
| <i>circC1orf27</i> | miR-3607-3p               | 6 |
| <i>circC1orf27</i> | miR-3662                  | 2 |
| <i>circC1orf27</i> | miR-3671                  | 2 |
| <i>circC1orf27</i> | miR-3674                  | 4 |
| <i>circC1orf27</i> | miR-3675-3p               | 2 |
| <i>circC1orf27</i> | miR-3681-5p               | 1 |
| <i>circC1orf27</i> | miR-3684                  | 1 |
| <i>circC1orf27</i> | miR-3685                  | 1 |
| <i>circC1orf27</i> | miR-369-3p                | 7 |
| <i>circC1orf27</i> | miR-3691-5p               | 1 |
| <i>circC1orf27</i> | miR-3692-3p               | 1 |
| <i>circC1orf27</i> | miR-374-5p                | 5 |
| <i>circC1orf27</i> | miR-374a-3p               | 2 |
| <i>circC1orf27</i> | miR-375                   | 8 |
| <i>circC1orf27</i> | miR-376-3p                | 3 |
| <i>circC1orf27</i> | miR-377-3p                | 4 |
| <i>circC1orf27</i> | miR-381-3p                | 3 |
| <i>circC1orf27</i> | miR-384                   | 1 |
| <i>circC1orf27</i> | miR-3912-5p               | 3 |
| <i>circC1orf27</i> | miR-3920                  | 5 |
| <i>circC1orf27</i> | miR-3928-5p/6806-3p       | 4 |
| <i>circC1orf27</i> | miR-3936                  | 1 |
| <i>circC1orf27</i> | miR-3977                  | 4 |
| <i>circC1orf27</i> | miR-410-3p                | 1 |
| <i>circC1orf27</i> | miR-4271/4725-3p/6780b-5p | 1 |
| <i>circC1orf27</i> | miR-4273/7156-5p          | 4 |
| <i>circC1orf27</i> | miR-4281                  | 1 |
| <i>circC1orf27</i> | miR-4289                  | 3 |
| <i>circC1orf27</i> | miR-4305                  | 1 |
| <i>circC1orf27</i> | miR-4307                  | 9 |
| <i>circC1orf27</i> | miR-4427                  | 5 |
| <i>circC1orf27</i> | miR-4428                  | 3 |
| <i>circC1orf27</i> | miR-4432                  | 3 |
| <i>circC1orf27</i> | miR-4452                  | 8 |

|                    |                       |   |
|--------------------|-----------------------|---|
| <i>circC1orf27</i> | miR-4453/4538         | 4 |
| <i>circC1orf27</i> | miR-4471/8059         | 1 |
| <i>circC1orf27</i> | miR-4475              | 1 |
| <i>circC1orf27</i> | miR-4476/6876-5p      | 2 |
| <i>circC1orf27</i> | miR-4477a             | 5 |
| <i>circC1orf27</i> | miR-4482-3p           | 2 |
| <i>circC1orf27</i> | miR-4511              | 4 |
| <i>circC1orf27</i> | miR-4515              | 3 |
| <i>circC1orf27</i> | miR-452-3p            | 3 |
| <i>circC1orf27</i> | miR-452-5p/892-3p     | 2 |
| <i>circC1orf27</i> | miR-4528              | 5 |
| <i>circC1orf27</i> | miR-4533              | 1 |
| <i>circC1orf27</i> | miR-4643              | 1 |
| <i>circC1orf27</i> | miR-4646-3p           | 2 |
| <i>circC1orf27</i> | miR-4659a-3p/4659b-3p | 2 |
| <i>circC1orf27</i> | miR-466               | 1 |
| <i>circC1orf27</i> | miR-4666a-3p          | 3 |
| <i>circC1orf27</i> | miR-4677-5p           | 4 |
| <i>circC1orf27</i> | miR-4680-3p           | 5 |
| <i>circC1orf27</i> | miR-4680-5p           | 3 |
| <i>circC1orf27</i> | miR-4683              | 3 |
| <i>circC1orf27</i> | miR-4684-5p           | 4 |
| <i>circC1orf27</i> | miR-4693-5p           | 1 |
| <i>circC1orf27</i> | miR-4694-3p           | 1 |
| <i>circC1orf27</i> | miR-4705              | 3 |
| <i>circC1orf27</i> | miR-4708-3p           | 3 |
| <i>circC1orf27</i> | miR-4717-3p           | 1 |
| <i>circC1orf27</i> | miR-4724-5p           | 6 |
| <i>circC1orf27</i> | miR-4728-3p           | 3 |
| <i>circC1orf27</i> | miR-4731-3p/4801      | 1 |
| <i>circC1orf27</i> | miR-4732-3p           | 1 |
| <i>circC1orf27</i> | miR-4738-3p           | 4 |
| <i>circC1orf27</i> | miR-4739              | 1 |
| <i>circC1orf27</i> | miR-4740-5p           | 3 |
| <i>circC1orf27</i> | miR-4751              | 2 |
| <i>circC1orf27</i> | miR-4759              | 4 |
| <i>circC1orf27</i> | miR-4762-5p           | 1 |
| <i>circC1orf27</i> | miR-4766-5p           | 1 |



|                    |                                                                   |   |
|--------------------|-------------------------------------------------------------------|---|
| <i>circC1orf27</i> | miR-4772-3p                                                       | 8 |
| <i>circC1orf27</i> | miR-4773                                                          | 2 |
| <i>circC1orf27</i> | miR-4789-3p                                                       | 1 |
| <i>circC1orf27</i> | miR-4799-5p                                                       | 2 |
| <i>circC1orf27</i> | miR-4803                                                          | 2 |
| <i>circC1orf27</i> | miR-488-3p                                                        | 4 |
| <i>circC1orf27</i> | miR-495-3p                                                        | 3 |
| <i>circC1orf27</i> | miR-5002-3p                                                       | 3 |
| <i>circC1orf27</i> | miR-5003-5p                                                       | 1 |
| <i>circC1orf27</i> | miR-5004-5p                                                       | 2 |
| <i>circC1orf27</i> | miR-503-3p                                                        | 1 |
| <i>circC1orf27</i> | miR-505-5p                                                        | 1 |
| <i>circC1orf27</i> | miR-509-3-5p/509-5p/4418                                          | 5 |
| <i>circC1orf27</i> | miR-513a-3p/513c-3p/3606-3p                                       | 6 |
| <i>circC1orf27</i> | miR-515-5p/519e-5p                                                | 3 |
| <i>circC1orf27</i> | miR-516a-3p/516b-3p/7162-5p                                       | 4 |
| <i>circC1orf27</i> | miR-5187-3p                                                       | 5 |
| <i>circC1orf27</i> | miR-5197-3p                                                       | 2 |
| <i>circC1orf27</i> | miR-522-3p                                                        | 1 |
| <i>circC1orf27</i> | miR-539-3p                                                        | 2 |
| <i>circC1orf27</i> | miR-543                                                           | 5 |
| <i>circC1orf27</i> | miR-548ac/548bb-3p/548d-3p/548h-3p/548z                           | 4 |
| <i>circC1orf27</i> | miR-548ao-5p/548ax                                                | 4 |
| <i>circC1orf27</i> | miR-548aq-3p/548am-3p/548aj-3p/548ah1-3p/548ae-3p/548j-3p/548x-3p | 3 |
| <i>circC1orf27</i> | miR-548av-3p                                                      | 3 |
| <i>circC1orf27</i> | miR-548az-3p/548ar-3p/548a-3p/548e-3p/548f-3p                     | 4 |
| <i>circC1orf27</i> | miR-548b-3p                                                       | 4 |
| <i>circC1orf27</i> | miR-548u/7161-5p                                                  | 1 |
| <i>circC1orf27</i> | miR-5582-3p                                                       | 1 |
| <i>circC1orf27</i> | miR-5585-5p                                                       | 4 |
| <i>circC1orf27</i> | miR-5586-5p                                                       | 5 |
| <i>circC1orf27</i> | miR-5681a                                                         | 5 |
| <i>circC1orf27</i> | miR-569                                                           | 1 |
| <i>circC1orf27</i> | miR-5692a                                                         | 1 |
| <i>circC1orf27</i> | miR-5692bc                                                        | 7 |
| <i>circC1orf27</i> | miR-5693                                                          | 1 |
| <i>circC1orf27</i> | miR-573/3616-5p                                                   | 3 |
| <i>circC1orf27</i> | miR-578                                                           | 5 |

|                    |              |   |
|--------------------|--------------|---|
| <i>circC1orf27</i> | miR-582-5p   | 4 |
| <i>circC1orf27</i> | miR-590-3p   | 6 |
| <i>circC1orf27</i> | miR-592      | 2 |
| <i>circC1orf27</i> | miR-599      | 2 |
| <i>circC1orf27</i> | miR-6083     | 2 |
| <i>circC1orf27</i> | miR-618      | 5 |
| <i>circC1orf27</i> | miR-625-3p   | 1 |
| <i>circC1orf27</i> | miR-628-5p   | 3 |
| <i>circC1orf27</i> | miR-640      | 1 |
| <i>circC1orf27</i> | miR-643      | 3 |
| <i>circC1orf27</i> | miR-6504-3p  | 1 |
| <i>circC1orf27</i> | miR-6512-5p  | 1 |
| <i>circC1orf27</i> | miR-6515-3p  | 2 |
| <i>circC1orf27</i> | miR-653-3p   | 7 |
| <i>circC1orf27</i> | miR-653-5p   | 2 |
| <i>circC1orf27</i> | miR-656-3p   | 3 |
| <i>circC1orf27</i> | miR-659-3p   | 5 |
| <i>circC1orf27</i> | miR-664a-3p  | 7 |
| <i>circC1orf27</i> | miR-670-3p   | 1 |
| <i>circC1orf27</i> | miR-670-5p   | 1 |
| <i>circC1orf27</i> | miR-6728-3p  | 1 |
| <i>circC1orf27</i> | miR-6730-5p  | 5 |
| <i>circC1orf27</i> | miR-6731-3p  | 2 |
| <i>circC1orf27</i> | miR-6739-3p  | 4 |
| <i>circC1orf27</i> | miR-6750-3p  | 2 |
| <i>circC1orf27</i> | miR-6755-3p  | 3 |
| <i>circC1orf27</i> | miR-6755-5p  | 1 |
| <i>circC1orf27</i> | miR-676-5p   | 2 |
| <i>circC1orf27</i> | miR-6760-5p  | 1 |
| <i>circC1orf27</i> | miR-6780a-3p | 2 |
| <i>circC1orf27</i> | miR-6783-5p  | 1 |
| <i>circC1orf27</i> | miR-6799-5p  | 1 |
| <i>circC1orf27</i> | miR-6800-5p  | 1 |
| <i>circC1orf27</i> | miR-6802-5p  | 1 |
| <i>circC1orf27</i> | miR-6816-3p  | 3 |
| <i>circC1orf27</i> | miR-6818-5p  | 1 |
| <i>circC1orf27</i> | miR-6830-5p  | 3 |
| <i>circC1orf27</i> | miR-6841-5p  | 1 |

|                    |                                       |   |
|--------------------|---------------------------------------|---|
| <i>circC1orf27</i> | miR-6853-3p                           | 4 |
| <i>circC1orf27</i> | miR-6870-3p                           | 1 |
| <i>circC1orf27</i> | miR-6875-3p                           | 2 |
| <i>circC1orf27</i> | miR-6881-3p                           | 2 |
| <i>circC1orf27</i> | miR-6885-3p                           | 4 |
| <i>circC1orf27</i> | miR-6886-5p                           | 3 |
| <i>circC1orf27</i> | miR-6888-5p                           | 3 |
| <i>circC1orf27</i> | miR-6892-5p                           | 1 |
| <i>circC1orf27</i> | miR-6894-5p                           | 1 |
| <i>circC1orf27</i> | miR-7106-5p                           | 1 |
| <i>circC1orf27</i> | miR-7111-3p                           | 2 |
| <i>circC1orf27</i> | miR-7151-5p                           | 1 |
| <i>circC1orf27</i> | miR-7154-3p                           | 1 |
| <i>circC1orf27</i> | miR-7159-3p                           | 2 |
| <i>circC1orf27</i> | miR-7515                              | 1 |
| <i>circC1orf27</i> | miR-765                               | 1 |
| <i>circC1orf27</i> | miR-766-5p                            | 1 |
| <i>circC1orf27</i> | miR-7843-3p                           | 4 |
| <i>circC1orf27</i> | miR-7844-5p                           | 1 |
| <i>circC1orf27</i> | miR-8056                              | 1 |
| <i>circC1orf27</i> | miR-8060                              | 1 |
| <i>circC1orf27</i> | miR-8068                              | 3 |
| <i>circC1orf27</i> | miR-8070                              | 8 |
| <i>circC1orf27</i> | miR-8080                              | 3 |
| <i>circC1orf27</i> | miR-8083                              | 4 |
| <i>circC1orf27</i> | miR-8087                              | 3 |
| <i>circC1orf27</i> | miR-873-5p.1                          | 2 |
| <i>circC1orf27</i> | miR-889-3p                            | 4 |
| <i>circC1orf27</i> | miR-891b                              | 3 |
| <i>circC1orf27</i> | miR-942-3p                            | 1 |
| <i>circC1orf27</i> | miR-95-5p                             | 3 |
| <i>circC1orf27</i> | let-7a-3p/let-7b-3p/let-7f-1-3p/98-3p | 3 |
| <i>circC1orf27</i> | let-7f-2-3p/1185-3p                   | 3 |
| <i>circC1orf27</i> | miR-1-3p/206                          | 1 |
| <i>circC1orf27</i> | miR-101-3p.1                          | 3 |
| <i>circC1orf27</i> | miR-101-5p                            | 1 |
| <i>circC1orf27</i> | miR-103a-2-5p                         | 1 |
| <i>circC1orf27</i> | miR-103b                              | 1 |

|                    |                     |   |
|--------------------|---------------------|---|
| <i>circC1orf27</i> | miR-1178-3p         | 1 |
| <i>circC1orf27</i> | miR-1179            | 2 |
| <i>circC1orf27</i> | miR-1184            | 1 |
| <i>circC1orf27</i> | miR-1185-5p         | 2 |
| <i>circC1orf27</i> | miR-1200            | 3 |
| <i>circC1orf27</i> | miR-1202/3972       | 1 |
| <i>circC1orf27</i> | miR-1205            | 1 |
| <i>circC1orf27</i> | miR-1208            | 1 |
| <i>circC1orf27</i> | miR-1224-5p         | 2 |
| <i>circC1orf27</i> | miR-1225-3p         | 2 |
| <i>circC1orf27</i> | miR-1225-5p         | 2 |
| <i>circC1orf27</i> | miR-1226-5p         | 1 |
| <i>circC1orf27</i> | miR-1229-5p         | 2 |
| <i>circC1orf27</i> | miR-1231            | 4 |
| <i>circC1orf27</i> | miR-1237-3p         | 2 |
| <i>circC1orf27</i> | miR-1238-5p/4758-5p | 1 |
| <i>circC1orf27</i> | miR-124-3p.1        | 2 |
| <i>circC1orf27</i> | miR-1244            | 1 |
| <i>circC1orf27</i> | miR-1245a/8079      | 1 |
| <i>circC1orf27</i> | miR-1245b-3p        | 3 |
| <i>circC1orf27</i> | miR-1245b-5p        | 1 |
| <i>circC1orf27</i> | miR-1246            | 3 |
| <i>circC1orf27</i> | miR-1248            | 2 |
| <i>circC1orf27</i> | miR-1251-5p         | 2 |
| <i>circC1orf27</i> | miR-1254/3116       | 1 |
| <i>circC1orf27</i> | miR-1255a/1255b-5p  | 4 |
| <i>circC1orf27</i> | miR-1255b-2-3p      | 1 |
| <i>circC1orf27</i> | miR-1258            | 1 |
| <i>circC1orf27</i> | miR-125a-3p         | 2 |
| <i>circC1orf27</i> | miR-126-5p          | 7 |
| <i>circC1orf27</i> | miR-1264            | 1 |
| <i>circC1orf27</i> | miR-1265            | 1 |
| <i>circC1orf27</i> | miR-1273g-3p        | 1 |
| <i>circC1orf27</i> | miR-1273g-5p        | 1 |
| <i>circC1orf27</i> | miR-1277-5p         | 2 |
| <i>circC1orf27</i> | miR-1278            | 1 |
| <i>circC1orf27</i> | miR-128-3p          | 1 |
| <i>circC1orf27</i> | miR-1283            | 2 |

|                    |                          |   |
|--------------------|--------------------------|---|
| <i>circC1orf27</i> | miR-1285-5p              | 3 |
| <i>circC1orf27</i> | miR-1287-3p              | 1 |
| <i>circC1orf27</i> | miR-1287-5p              | 2 |
| <i>circC1orf27</i> | miR-1288-5p              | 4 |
| <i>circC1orf27</i> | miR-129-5p               | 1 |
| <i>circC1orf27</i> | miR-1290                 | 1 |
| <i>circC1orf27</i> | miR-1295a                | 1 |
| <i>circC1orf27</i> | miR-1295b-3p             | 3 |
| <i>circC1orf27</i> | miR-1295b-5p/1912        | 2 |
| <i>circC1orf27</i> | miR-1296-5p              | 1 |
| <i>circC1orf27</i> | miR-1298-3p              | 3 |
| <i>circC1orf27</i> | miR-1298-5p              | 1 |
| <i>circC1orf27</i> | miR-1299                 | 6 |
| <i>circC1orf27</i> | miR-130-3p/301-3p/454-3p | 1 |
| <i>circC1orf27</i> | miR-1301-3p              | 3 |
| <i>circC1orf27</i> | miR-1301-5p/6502-5p      | 2 |
| <i>circC1orf27</i> | miR-1302/4298            | 2 |
| <i>circC1orf27</i> | miR-1303                 | 1 |
| <i>circC1orf27</i> | miR-1304-3p              | 2 |
| <i>circC1orf27</i> | miR-1304-5p              | 1 |
| <i>circC1orf27</i> | miR-1306-5p              | 2 |
| <i>circC1orf27</i> | miR-130b-5p              | 6 |
| <i>circC1orf27</i> | miR-132-3p/212-3p        | 2 |
| <i>circC1orf27</i> | miR-1323                 | 1 |
| <i>circC1orf27</i> | miR-1324                 | 1 |
| <i>circC1orf27</i> | miR-133a-5p              | 2 |
| <i>circC1orf27</i> | miR-1343-3p              | 1 |
| <i>circC1orf27</i> | miR-138-5p               | 2 |
| <i>circC1orf27</i> | miR-140-5p               | 1 |
| <i>circC1orf27</i> | miR-141-3p/200-3p        | 1 |
| <i>circC1orf27</i> | miR-142-3p.2             | 3 |
| <i>circC1orf27</i> | miR-144-3p               | 3 |
| <i>circC1orf27</i> | miR-145-3p               | 2 |
| <i>circC1orf27</i> | miR-145-5p               | 2 |
| <i>circC1orf27</i> | miR-1468-3p              | 1 |
| <i>circC1orf27</i> | miR-146a-3p              | 1 |
| <i>circC1orf27</i> | miR-1470                 | 2 |
| <i>circC1orf27</i> | miR-149-5p               | 3 |

|                    |                      |    |
|--------------------|----------------------|----|
| <i>circC1orf27</i> | miR-150-5p           | 2  |
| <i>circC1orf27</i> | miR-152-5p           | 2  |
| <i>circC1orf27</i> | miR-153-3p           | 4  |
| <i>circC1orf27</i> | miR-153-5p           | 13 |
| <i>circC1orf27</i> | miR-154-3p/487-3p    | 3  |
| <i>circC1orf27</i> | miR-1587/3620-5p     | 1  |
| <i>circC1orf27</i> | miR-15b-3p           | 1  |
| <i>circC1orf27</i> | miR-16-1-3p          | 2  |
| <i>circC1orf27</i> | miR-17-3p            | 1  |
| <i>circC1orf27</i> | miR-181-5p           | 1  |
| <i>circC1orf27</i> | miR-182-3p           | 3  |
| <i>circC1orf27</i> | miR-1825             | 1  |
| <i>circC1orf27</i> | miR-1827             | 1  |
| <i>circC1orf27</i> | miR-183-5p.1         | 3  |
| <i>circC1orf27</i> | miR-186-3p           | 3  |
| <i>circC1orf27</i> | miR-1909-5p          | 1  |
| <i>circC1orf27</i> | miR-1910-3p/6511a-5p | 2  |
| <i>circC1orf27</i> | miR-1911-3p          | 3  |
| <i>circC1orf27</i> | miR-1911-5p          | 1  |
| <i>circC1orf27</i> | miR-1914-5p          | 2  |
| <i>circC1orf27</i> | miR-1915-3p/6764-5p  | 3  |
| <i>circC1orf27</i> | miR-1976             | 1  |
| <i>circC1orf27</i> | miR-198              | 1  |
| <i>circC1orf27</i> | miR-199-3p           | 2  |
| <i>circC1orf27</i> | miR-199-5p           | 1  |
| <i>circC1orf27</i> | miR-200-3p/429       | 1  |
| <i>circC1orf27</i> | miR-200c-5p/550a-3p  | 1  |
| <i>circC1orf27</i> | miR-203a-3p.1        | 3  |
| <i>circC1orf27</i> | miR-203a-5p          | 1  |
| <i>circC1orf27</i> | miR-203b-3p          | 1  |
| <i>circC1orf27</i> | miR-204-5p/211-5p    | 1  |
| <i>circC1orf27</i> | miR-205-3p           | 5  |
| <i>circC1orf27</i> | miR-208-3p           | 2  |
| <i>circC1orf27</i> | miR-20a-3p           | 1  |
| <i>circC1orf27</i> | miR-20b-3p           | 1  |
| <i>circC1orf27</i> | miR-21-5p/590-5p     | 1  |
| <i>circC1orf27</i> | miR-2113             | 5  |
| <i>circC1orf27</i> | miR-2115-3p          | 4  |

|                    |                     |   |
|--------------------|---------------------|---|
| <i>circC1orf27</i> | miR-2116-3p         | 2 |
| <i>circC1orf27</i> | miR-2117            | 3 |
| <i>circC1orf27</i> | miR-214-3p/3619-5p  | 3 |
| <i>circC1orf27</i> | miR-214-5p          | 2 |
| <i>circC1orf27</i> | miR-215-3p          | 3 |
| <i>circC1orf27</i> | miR-216a-5p         | 2 |
| <i>circC1orf27</i> | miR-216b-5p         | 2 |
| <i>circC1orf27</i> | miR-218-1-3p        | 3 |
| <i>circC1orf27</i> | miR-218-2-3p        | 3 |
| <i>circC1orf27</i> | miR-218-5p          | 2 |
| <i>circC1orf27</i> | miR-219-5p          | 3 |
| <i>circC1orf27</i> | miR-219b-5p         | 1 |
| <i>circC1orf27</i> | miR-223-5p          | 2 |
| <i>circC1orf27</i> | miR-2276-5p         | 2 |
| <i>circC1orf27</i> | miR-2278            | 1 |
| <i>circC1orf27</i> | miR-23-5p           | 2 |
| <i>circC1orf27</i> | miR-2355-5p         | 1 |
| <i>circC1orf27</i> | miR-2392            | 3 |
| <i>circC1orf27</i> | miR-24-3p           | 1 |
| <i>circC1orf27</i> | miR-2467-3p         | 1 |
| <i>circC1orf27</i> | miR-26-5p           | 1 |
| <i>circC1orf27</i> | miR-2681-3p         | 5 |
| <i>circC1orf27</i> | miR-2681-5p         | 1 |
| <i>circC1orf27</i> | miR-2682-3p/6781-3p | 5 |
| <i>circC1orf27</i> | miR-26b-3p          | 1 |
| <i>circC1orf27</i> | miR-27a-5p          | 1 |
| <i>circC1orf27</i> | miR-28-5p/708-5p    | 2 |
| <i>circC1orf27</i> | miR-297             | 1 |
| <i>circC1orf27</i> | miR-30-3p           | 3 |
| <i>circC1orf27</i> | miR-302a-5p         | 1 |
| <i>circC1orf27</i> | miR-3064-3p         | 1 |
| <i>circC1orf27</i> | miR-3065-5p         | 1 |
| <i>circC1orf27</i> | miR-3074-5p         | 2 |
| <i>circC1orf27</i> | miR-3117-3p         | 1 |
| <i>circC1orf27</i> | miR-3119            | 1 |
| <i>circC1orf27</i> | miR-3120-5p         | 1 |
| <i>circC1orf27</i> | miR-3121-3p         | 5 |
| <i>circC1orf27</i> | miR-3122/3913-5p    | 1 |

|                    |                           |   |
|--------------------|---------------------------|---|
| <i>circC1orf27</i> | miR-3125/3916/6859-5p     | 2 |
| <i>circC1orf27</i> | miR-3126-3p               | 3 |
| <i>circC1orf27</i> | miR-3127-3p/6756-3p       | 1 |
| <i>circC1orf27</i> | miR-3129-3p/5583-5p       | 1 |
| <i>circC1orf27</i> | miR-3130-5p/4482-5p       | 2 |
| <i>circC1orf27</i> | miR-3134                  | 3 |
| <i>circC1orf27</i> | miR-3135b                 | 2 |
| <i>circC1orf27</i> | miR-3136-5p/4439          | 1 |
| <i>circC1orf27</i> | miR-3137                  | 1 |
| <i>circC1orf27</i> | miR-3140-3p               | 4 |
| <i>circC1orf27</i> | miR-3140-5p               | 1 |
| <i>circC1orf27</i> | miR-3147                  | 1 |
| <i>circC1orf27</i> | miR-3149                  | 2 |
| <i>circC1orf27</i> | miR-3151-3p               | 1 |
| <i>circC1orf27</i> | miR-3152-3p               | 1 |
| <i>circC1orf27</i> | miR-3156-5p               | 1 |
| <i>circC1orf27</i> | miR-3157-5p               | 3 |
| <i>circC1orf27</i> | miR-3158-3p               | 1 |
| <i>circC1orf27</i> | miR-3158-5p               | 1 |
| <i>circC1orf27</i> | miR-3160-3p               | 1 |
| <i>circC1orf27</i> | miR-3160-5p               | 2 |
| <i>circC1orf27</i> | miR-3161                  | 1 |
| <i>circC1orf27</i> | miR-3162-3p               | 1 |
| <i>circC1orf27</i> | miR-3180-5p               | 2 |
| <i>circC1orf27</i> | miR-3182                  | 1 |
| <i>circC1orf27</i> | miR-3183/4723-3p/6769b-3p | 4 |
| <i>circC1orf27</i> | miR-3184-3p               | 1 |
| <i>circC1orf27</i> | miR-3189-5p               | 2 |
| <i>circC1orf27</i> | miR-3191-5p               | 4 |
| <i>circC1orf27</i> | miR-3192-3p               | 1 |
| <i>circC1orf27</i> | miR-3193                  | 1 |
| <i>circC1orf27</i> | miR-3198/4309             | 1 |
| <i>circC1orf27</i> | miR-3199/8052             | 2 |
| <i>circC1orf27</i> | miR-320                   | 1 |
| <i>circC1orf27</i> | miR-3200-3p               | 2 |
| <i>circC1orf27</i> | miR-3200-5p               | 1 |
| <i>circC1orf27</i> | miR-326                   | 4 |
| <i>circC1orf27</i> | miR-329-3p/362-3p         | 4 |



|                    |                           |   |
|--------------------|---------------------------|---|
| <i>circC1orf27</i> | miR-330-3p                | 2 |
| <i>circC1orf27</i> | miR-330-3p.2              | 6 |
| <i>circC1orf27</i> | miR-338-5p                | 1 |
| <i>circC1orf27</i> | miR-33a-3p                | 9 |
| <i>circC1orf27</i> | miR-345-3p                | 1 |
| <i>circC1orf27</i> | miR-34b-5p/449c-5p        | 2 |
| <i>circC1orf27</i> | miR-3605-5p               | 2 |
| <i>circC1orf27</i> | miR-3614-5p               | 2 |
| <i>circC1orf27</i> | miR-3616-3p               | 1 |
| <i>circC1orf27</i> | miR-3619-3p               | 1 |
| <i>circC1orf27</i> | miR-362-5p/500b-5p        | 2 |
| <i>circC1orf27</i> | miR-3620-3p               | 1 |
| <i>circC1orf27</i> | miR-3652/4430             | 3 |
| <i>circC1orf27</i> | miR-3653-5p               | 1 |
| <i>circC1orf27</i> | miR-3655                  | 3 |
| <i>circC1orf27</i> | miR-3658                  | 1 |
| <i>circC1orf27</i> | miR-365a-5p/365b-5p       | 2 |
| <i>circC1orf27</i> | miR-3663-3p               | 1 |
| <i>circC1orf27</i> | miR-3663-5p               | 2 |
| <i>circC1orf27</i> | miR-3670                  | 1 |
| <i>circC1orf27</i> | miR-3682-3p               | 3 |
| <i>circC1orf27</i> | miR-3682-5p               | 1 |
| <i>circC1orf27</i> | miR-3686                  | 1 |
| <i>circC1orf27</i> | miR-3688-5p               | 1 |
| <i>circC1orf27</i> | miR-3690                  | 1 |
| <i>circC1orf27</i> | miR-3691-3p               | 1 |
| <i>circC1orf27</i> | miR-370-3p                | 1 |
| <i>circC1orf27</i> | miR-371-5p                | 3 |
| <i>circC1orf27</i> | miR-3714                  | 2 |
| <i>circC1orf27</i> | miR-371b-5p/373-5p/616-5p | 3 |
| <i>circC1orf27</i> | miR-372-5p                | 3 |
| <i>circC1orf27</i> | miR-376a-2-5p             | 1 |
| <i>circC1orf27</i> | miR-376a-5p               | 1 |
| <i>circC1orf27</i> | miR-378a-5p               | 3 |
| <i>circC1orf27</i> | miR-378g                  | 1 |
| <i>circC1orf27</i> | miR-378j/6839-5p          | 4 |
| <i>circC1orf27</i> | miR-379-5p                | 1 |
| <i>circC1orf27</i> | miR-382-3p                | 4 |

|                    |                     |   |
|--------------------|---------------------|---|
| <i>circC1orf27</i> | miR-382-5p          | 1 |
| <i>circC1orf27</i> | miR-383-5p.1        | 1 |
| <i>circC1orf27</i> | miR-383-5p.2        | 1 |
| <i>circC1orf27</i> | miR-3907            | 1 |
| <i>circC1orf27</i> | miR-3909            | 1 |
| <i>circC1orf27</i> | miR-3910            | 2 |
| <i>circC1orf27</i> | miR-3914            | 1 |
| <i>circC1orf27</i> | miR-3915            | 2 |
| <i>circC1orf27</i> | miR-3922-5p         | 2 |
| <i>circC1orf27</i> | miR-3923            | 1 |
| <i>circC1orf27</i> | miR-3924            | 1 |
| <i>circC1orf27</i> | miR-3928-3p         | 1 |
| <i>circC1orf27</i> | miR-3929/4419b/4478 | 3 |
| <i>circC1orf27</i> | miR-3934-5p         | 2 |
| <i>circC1orf27</i> | miR-3942-3p         | 4 |
| <i>circC1orf27</i> | miR-3943            | 2 |
| <i>circC1orf27</i> | miR-3978            | 3 |
| <i>circC1orf27</i> | miR-409-3p          | 3 |
| <i>circC1orf27</i> | miR-411-5p.1        | 2 |
| <i>circC1orf27</i> | miR-421             | 2 |
| <i>circC1orf27</i> | miR-4251            | 1 |
| <i>circC1orf27</i> | miR-4254            | 1 |
| <i>circC1orf27</i> | miR-4255            | 3 |
| <i>circC1orf27</i> | miR-4257            | 1 |
| <i>circC1orf27</i> | miR-4259            | 1 |
| <i>circC1orf27</i> | miR-4263            | 1 |
| <i>circC1orf27</i> | miR-4266            | 1 |
| <i>circC1orf27</i> | miR-4267            | 2 |
| <i>circC1orf27</i> | miR-4268            | 4 |
| <i>circC1orf27</i> | miR-4272            | 1 |
| <i>circC1orf27</i> | miR-4279            | 3 |
| <i>circC1orf27</i> | miR-4282            | 2 |
| <i>circC1orf27</i> | miR-4284            | 1 |
| <i>circC1orf27</i> | miR-4287/4685-3p    | 2 |
| <i>circC1orf27</i> | miR-4299            | 1 |
| <i>circC1orf27</i> | miR-4303            | 2 |
| <i>circC1orf27</i> | miR-431-5p          | 1 |
| <i>circC1orf27</i> | miR-4310/7157-5p    | 1 |

|                    |                                              |   |
|--------------------|----------------------------------------------|---|
| <i>circC1orf27</i> | miR-432-3p                                   | 3 |
| <i>circC1orf27</i> | miR-432-5p                                   | 1 |
| <i>circC1orf27</i> | miR-4323                                     | 2 |
| <i>circC1orf27</i> | miR-4324                                     | 1 |
| <i>circC1orf27</i> | miR-4328                                     | 2 |
| <i>circC1orf27</i> | miR-4329                                     | 1 |
| <i>circC1orf27</i> | miR-433-3p                                   | 1 |
| <i>circC1orf27</i> | miR-4330                                     | 2 |
| <i>circC1orf27</i> | miR-4422                                     | 6 |
| <i>circC1orf27</i> | miR-4423-3p                                  | 3 |
| <i>circC1orf27</i> | miR-4425                                     | 1 |
| <i>circC1orf27</i> | miR-4426/4647/4662b                          | 1 |
| <i>circC1orf27</i> | miR-4433a-3p                                 | 1 |
| <i>circC1orf27</i> | miR-4436b-3p/4632-5p/6735-5p/6879-5p/7843-5p | 1 |
| <i>circC1orf27</i> | miR-4436b-5p                                 | 1 |
| <i>circC1orf27</i> | miR-4437                                     | 1 |
| <i>circC1orf27</i> | miR-4445-5p                                  | 3 |
| <i>circC1orf27</i> | miR-4446-3p                                  | 1 |
| <i>circC1orf27</i> | miR-4446-5p                                  | 2 |
| <i>circC1orf27</i> | miR-4448                                     | 4 |
| <i>circC1orf27</i> | miR-4451                                     | 1 |
| <i>circC1orf27</i> | miR-4456                                     | 1 |
| <i>circC1orf27</i> | miR-4459                                     | 1 |
| <i>circC1orf27</i> | miR-4469                                     | 2 |
| <i>circC1orf27</i> | miR-4470                                     | 1 |
| <i>circC1orf27</i> | miR-4474-3p                                  | 1 |
| <i>circC1orf27</i> | miR-4474-5p                                  | 3 |
| <i>circC1orf27</i> | miR-448                                      | 4 |
| <i>circC1orf27</i> | miR-4486                                     | 1 |
| <i>circC1orf27</i> | miR-4487                                     | 1 |
| <i>circC1orf27</i> | miR-4495                                     | 2 |
| <i>circC1orf27</i> | miR-4496                                     | 1 |
| <i>circC1orf27</i> | miR-449c-3p                                  | 3 |
| <i>circC1orf27</i> | miR-4501                                     | 3 |
| <i>circC1orf27</i> | miR-4505/5787                                | 3 |
| <i>circC1orf27</i> | miR-4506                                     | 1 |
| <i>circC1orf27</i> | miR-4509                                     | 1 |
| <i>circC1orf27</i> | miR-450a-1-3p                                | 1 |

|                    |                       |   |
|--------------------|-----------------------|---|
| <i>circC1orf27</i> | miR-4517              | 2 |
| <i>circC1orf27</i> | miR-4524a-3p          | 3 |
| <i>circC1orf27</i> | miR-4524b-3p          | 2 |
| <i>circC1orf27</i> | miR-4534/8082         | 3 |
| <i>circC1orf27</i> | miR-4539              | 1 |
| <i>circC1orf27</i> | miR-454-5p            | 1 |
| <i>circC1orf27</i> | miR-4633-3p/6500-5p   | 2 |
| <i>circC1orf27</i> | miR-4635              | 3 |
| <i>circC1orf27</i> | miR-4640-5p           | 2 |
| <i>circC1orf27</i> | miR-4645-5p/4673      | 3 |
| <i>circC1orf27</i> | miR-4649-3p           | 3 |
| <i>circC1orf27</i> | miR-4650-3p           | 1 |
| <i>circC1orf27</i> | miR-4655-3p           | 1 |
| <i>circC1orf27</i> | miR-4658/6790-5p      | 1 |
| <i>circC1orf27</i> | miR-4659a-5p/4659b-5p | 1 |
| <i>circC1orf27</i> | miR-4660              | 4 |
| <i>circC1orf27</i> | miR-4661-3p           | 1 |
| <i>circC1orf27</i> | miR-4663              | 2 |
| <i>circC1orf27</i> | miR-4666a-5p          | 2 |
| <i>circC1orf27</i> | miR-4667-3p           | 2 |
| <i>circC1orf27</i> | miR-4668-3p           | 3 |
| <i>circC1orf27</i> | miR-4674              | 1 |
| <i>circC1orf27</i> | miR-4677-3p           | 1 |
| <i>circC1orf27</i> | miR-4679              | 1 |
| <i>circC1orf27</i> | miR-4682              | 3 |
| <i>circC1orf27</i> | miR-4684-3p           | 2 |
| <i>circC1orf27</i> | miR-4686              | 2 |
| <i>circC1orf27</i> | miR-4689/6858-5p      | 2 |
| <i>circC1orf27</i> | miR-4690-3p/5685      | 2 |
| <i>circC1orf27</i> | miR-4690-5p           | 2 |
| <i>circC1orf27</i> | miR-4695-3p           | 1 |
| <i>circC1orf27</i> | miR-4699-3p           | 3 |
| <i>circC1orf27</i> | miR-4699-5p           | 1 |
| <i>circC1orf27</i> | miR-4700-3p           | 1 |
| <i>circC1orf27</i> | miR-4703-3p           | 2 |
| <i>circC1orf27</i> | miR-4709-3p           | 2 |
| <i>circC1orf27</i> | miR-4709-5p           | 1 |
| <i>circC1orf27</i> | miR-4711-5p           | 3 |

|                    |                     |   |
|--------------------|---------------------|---|
| <i>circC1orf27</i> | miR-4713-5p         | 1 |
| <i>circC1orf27</i> | miR-4715-3p         | 1 |
| <i>circC1orf27</i> | miR-4715-5p         | 1 |
| <i>circC1orf27</i> | miR-4716-5p         | 1 |
| <i>circC1orf27</i> | miR-4721            | 1 |
| <i>circC1orf27</i> | miR-4724-3p         | 1 |
| <i>circC1orf27</i> | miR-4726-3p         | 3 |
| <i>circC1orf27</i> | miR-4727-5p         | 3 |
| <i>circC1orf27</i> | miR-4729            | 2 |
| <i>circC1orf27</i> | miR-4732-5p         | 2 |
| <i>circC1orf27</i> | miR-4733-5p         | 2 |
| <i>circC1orf27</i> | miR-4735-5p         | 1 |
| <i>circC1orf27</i> | miR-4744            | 1 |
| <i>circC1orf27</i> | miR-4753-3p         | 4 |
| <i>circC1orf27</i> | miR-4755-3p         | 1 |
| <i>circC1orf27</i> | miR-4755-5p/5006-3p | 4 |
| <i>circC1orf27</i> | miR-4758-3p         | 2 |
| <i>circC1orf27</i> | miR-4760-3p         | 1 |
| <i>circC1orf27</i> | miR-4760-5p/8061    | 1 |
| <i>circC1orf27</i> | miR-4761-3p         | 1 |
| <i>circC1orf27</i> | miR-4762-3p         | 1 |
| <i>circC1orf27</i> | miR-4767            | 2 |
| <i>circC1orf27</i> | miR-4768-3p         | 1 |
| <i>circC1orf27</i> | miR-4768-5p/6833-3p | 6 |
| <i>circC1orf27</i> | miR-4769-3p/6817-5p | 2 |
| <i>circC1orf27</i> | miR-4772-5p         | 1 |
| <i>circC1orf27</i> | miR-4775            | 3 |
| <i>circC1orf27</i> | miR-4776-3p         | 1 |
| <i>circC1orf27</i> | miR-4777-3p         | 2 |
| <i>circC1orf27</i> | miR-4777-5p         | 2 |
| <i>circC1orf27</i> | miR-4778-3p         | 3 |
| <i>circC1orf27</i> | miR-4780            | 1 |
| <i>circC1orf27</i> | miR-4781-3p         | 3 |
| <i>circC1orf27</i> | miR-4782-5p/5706    | 6 |
| <i>circC1orf27</i> | miR-4786-3p         | 1 |
| <i>circC1orf27</i> | miR-4789-5p         | 3 |
| <i>circC1orf27</i> | miR-4790-5p         | 1 |
| <i>circC1orf27</i> | miR-4793-5p         | 1 |

|                    |                     |   |
|--------------------|---------------------|---|
| <i>circC1orf27</i> | miR-4795-3p         | 6 |
| <i>circC1orf27</i> | miR-483-3p.1        | 3 |
| <i>circC1orf27</i> | miR-484/3155        | 5 |
| <i>circC1orf27</i> | miR-490-3p          | 1 |
| <i>circC1orf27</i> | miR-494-3p          | 3 |
| <i>circC1orf27</i> | miR-495-5p          | 1 |
| <i>circC1orf27</i> | miR-498             | 1 |
| <i>circC1orf27</i> | miR-499a-3p/499b-3p | 1 |
| <i>circC1orf27</i> | miR-499a-5p         | 2 |
| <i>circC1orf27</i> | miR-5000-5p         | 2 |
| <i>circC1orf27</i> | miR-5001-3p         | 3 |
| <i>circC1orf27</i> | miR-5002-5p         | 3 |
| <i>circC1orf27</i> | miR-5006-5p         | 1 |
| <i>circC1orf27</i> | miR-5007-3p         | 2 |
| <i>circC1orf27</i> | miR-5009-3p         | 1 |
| <i>circC1orf27</i> | miR-500a-5p         | 1 |
| <i>circC1orf27</i> | miR-500b-3p         | 2 |
| <i>circC1orf27</i> | miR-501-5p          | 2 |
| <i>circC1orf27</i> | miR-5010-3p         | 5 |
| <i>circC1orf27</i> | miR-5011-5p         | 4 |
| <i>circC1orf27</i> | miR-502-5p          | 1 |
| <i>circC1orf27</i> | miR-505-3p.2        | 2 |
| <i>circC1orf27</i> | miR-506-5p          | 3 |
| <i>circC1orf27</i> | miR-508-3p          | 3 |
| <i>circC1orf27</i> | miR-5088-3p         | 1 |
| <i>circC1orf27</i> | miR-5088-5p         | 1 |
| <i>circC1orf27</i> | miR-5092            | 1 |
| <i>circC1orf27</i> | miR-5093            | 3 |
| <i>circC1orf27</i> | miR-5095/7151-3p    | 1 |
| <i>circC1orf27</i> | miR-5096            | 1 |
| <i>circC1orf27</i> | miR-510-3p          | 1 |
| <i>circC1orf27</i> | miR-5100            | 5 |
| <i>circC1orf27</i> | miR-511-5p          | 2 |
| <i>circC1orf27</i> | miR-513b-3p         | 4 |
| <i>circC1orf27</i> | miR-513c-5p/514b-5p | 2 |
| <i>circC1orf27</i> | miR-516b-5p         | 6 |
| <i>circC1orf27</i> | miR-517-5p          | 2 |
| <i>circC1orf27</i> | miR-518a-5p/527     | 2 |

|                    |                                      |   |
|--------------------|--------------------------------------|---|
| <i>circC1orf27</i> | miR-518c-5p                          | 4 |
| <i>circC1orf27</i> | miR-518d-5p/519-5p                   | 2 |
| <i>circC1orf27</i> | miR-5190                             | 2 |
| <i>circC1orf27</i> | miR-5195-5p                          | 1 |
| <i>circC1orf27</i> | miR-5196-3p                          | 1 |
| <i>circC1orf27</i> | miR-519d-5p                          | 3 |
| <i>circC1orf27</i> | miR-520f-5p                          | 1 |
| <i>circC1orf27</i> | miR-520g-5p                          | 3 |
| <i>circC1orf27</i> | miR-524-5p                           | 1 |
| <i>circC1orf27</i> | miR-525-5p                           | 1 |
| <i>circC1orf27</i> | miR-526b-5p                          | 2 |
| <i>circC1orf27</i> | miR-532-3p                           | 2 |
| <i>circC1orf27</i> | miR-532-5p                           | 2 |
| <i>circC1orf27</i> | miR-539-5p                           | 1 |
| <i>circC1orf27</i> | miR-544a                             | 1 |
| <i>circC1orf27</i> | miR-544b                             | 1 |
| <i>circC1orf27</i> | miR-545-3p                           | 2 |
| <i>circC1orf27</i> | miR-545-5p                           | 1 |
| <i>circC1orf27</i> | miR-548aj-5p/548f-5p/548g-5p/548x-5p | 1 |
| <i>circC1orf27</i> | miR-548at-5p                         | 3 |
| <i>circC1orf27</i> | miR-548aw                            | 2 |
| <i>circC1orf27</i> | miR-548az-5p/548t-5p                 | 1 |
| <i>circC1orf27</i> | miR-548c-3p                          | 2 |
| <i>circC1orf27</i> | miR-548e-5p                          | 1 |
| <i>circC1orf27</i> | miR-548m                             | 1 |
| <i>circC1orf27</i> | miR-548n                             | 1 |
| <i>circC1orf27</i> | miR-548p                             | 1 |
| <i>circC1orf27</i> | miR-548q                             | 1 |
| <i>circC1orf27</i> | miR-549a                             | 1 |
| <i>circC1orf27</i> | miR-550a-3-5p/550a-5p/1271-3p        | 4 |
| <i>circC1orf27</i> | miR-550b-2-5p                        | 4 |
| <i>circC1orf27</i> | miR-550b-3p                          | 2 |
| <i>circC1orf27</i> | miR-552-5p                           | 1 |
| <i>circC1orf27</i> | miR-554                              | 3 |
| <i>circC1orf27</i> | miR-555                              | 1 |
| <i>circC1orf27</i> | miR-5571-3p                          | 2 |
| <i>circC1orf27</i> | miR-5571-5p                          | 4 |
| <i>circC1orf27</i> | miR-5579-3p                          | 1 |

|                    |             |    |
|--------------------|-------------|----|
| <i>circC1orf27</i> | miR-558     | 1  |
| <i>circC1orf27</i> | miR-5583-3p | 2  |
| <i>circC1orf27</i> | miR-5587-5p | 1  |
| <i>circC1orf27</i> | miR-5589-3p | 1  |
| <i>circC1orf27</i> | miR-5590-5p | 1  |
| <i>circC1orf27</i> | miR-561-3p  | 3  |
| <i>circC1orf27</i> | miR-562     | 1  |
| <i>circC1orf27</i> | miR-5680    | 1  |
| <i>circC1orf27</i> | miR-5683    | 3  |
| <i>circC1orf27</i> | miR-5690    | 1  |
| <i>circC1orf27</i> | miR-5691    | 1  |
| <i>circC1orf27</i> | miR-5694    | 1  |
| <i>circC1orf27</i> | miR-5695    | 3  |
| <i>circC1orf27</i> | miR-5696    | 13 |
| <i>circC1orf27</i> | miR-5697    | 2  |
| <i>circC1orf27</i> | miR-5699-5p | 2  |
| <i>circC1orf27</i> | miR-5701    | 1  |
| <i>circC1orf27</i> | miR-5704    | 1  |
| <i>circC1orf27</i> | miR-5705    | 1  |
| <i>circC1orf27</i> | miR-576-3p  | 1  |
| <i>circC1orf27</i> | miR-576-5p  | 1  |
| <i>circC1orf27</i> | miR-577     | 3  |
| <i>circC1orf27</i> | miR-579-3p  | 13 |
| <i>circC1orf27</i> | miR-580-3p  | 1  |
| <i>circC1orf27</i> | miR-580-5p  | 2  |
| <i>circC1orf27</i> | miR-581     | 3  |
| <i>circC1orf27</i> | miR-584-3p  | 1  |
| <i>circC1orf27</i> | miR-584-5p  | 2  |
| <i>circC1orf27</i> | miR-586     | 2  |
| <i>circC1orf27</i> | miR-587     | 2  |
| <i>circC1orf27</i> | miR-589-3p  | 1  |
| <i>circC1orf27</i> | miR-593-3p  | 2  |
| <i>circC1orf27</i> | miR-597-3p  | 2  |
| <i>circC1orf27</i> | miR-600     | 3  |
| <i>circC1orf27</i> | miR-603     | 4  |
| <i>circC1orf27</i> | miR-604     | 3  |
| <i>circC1orf27</i> | miR-607     | 1  |
| <i>circC1orf27</i> | miR-6074    | 1  |



|                    |                                      |   |
|--------------------|--------------------------------------|---|
| <i>circC1orf27</i> | miR-6079                             | 1 |
| <i>circC1orf27</i> | miR-6080                             | 3 |
| <i>circC1orf27</i> | miR-610                              | 1 |
| <i>circC1orf27</i> | miR-612/1285-3p/3187-5p/5189-5p/6860 | 1 |
| <i>circC1orf27</i> | miR-6128                             | 4 |
| <i>circC1orf27</i> | miR-6131                             | 2 |
| <i>circC1orf27</i> | miR-616-3p                           | 2 |
| <i>circC1orf27</i> | miR-6165                             | 2 |
| <i>circC1orf27</i> | miR-617                              | 1 |
| <i>circC1orf27</i> | miR-623                              | 1 |
| <i>circC1orf27</i> | miR-624-3p                           | 2 |
| <i>circC1orf27</i> | miR-627-5p                           | 2 |
| <i>circC1orf27</i> | miR-629-3p                           | 3 |
| <i>circC1orf27</i> | miR-630                              | 1 |
| <i>circC1orf27</i> | miR-632/4288                         | 4 |
| <i>circC1orf27</i> | miR-633                              | 1 |
| <i>circC1orf27</i> | miR-636                              | 1 |
| <i>circC1orf27</i> | miR-639                              | 1 |
| <i>circC1orf27</i> | miR-642a-5p                          | 4 |
| <i>circC1orf27</i> | miR-642b-5p                          | 1 |
| <i>circC1orf27</i> | miR-645                              | 1 |
| <i>circC1orf27</i> | miR-647                              | 3 |
| <i>circC1orf27</i> | miR-649                              | 1 |
| <i>circC1orf27</i> | miR-6500-3p                          | 2 |
| <i>circC1orf27</i> | miR-6503-3p                          | 1 |
| <i>circC1orf27</i> | miR-6505-3p                          | 1 |
| <i>circC1orf27</i> | miR-6507-3p                          | 1 |
| <i>circC1orf27</i> | miR-6508-3p                          | 2 |
| <i>circC1orf27</i> | miR-6509-3p                          | 1 |
| <i>circC1orf27</i> | miR-651-5p                           | 5 |
| <i>circC1orf27</i> | miR-6510-5p                          | 2 |
| <i>circC1orf27</i> | miR-6511-3p                          | 3 |
| <i>circC1orf27</i> | miR-6513-5p                          | 1 |
| <i>circC1orf27</i> | miR-6514-3p                          | 2 |
| <i>circC1orf27</i> | miR-6516-3p                          | 2 |
| <i>circC1orf27</i> | miR-654-3p                           | 3 |
| <i>circC1orf27</i> | miR-656-5p                           | 1 |
| <i>circC1orf27</i> | miR-661                              | 1 |

|                    |                     |   |
|--------------------|---------------------|---|
| <i>circC1orf27</i> | miR-664a-5p/4794    | 3 |
| <i>circC1orf27</i> | miR-665             | 2 |
| <i>circC1orf27</i> | miR-671-5p          | 2 |
| <i>circC1orf27</i> | miR-6715b-3p        | 1 |
| <i>circC1orf27</i> | miR-6720-5p         | 2 |
| <i>circC1orf27</i> | miR-6721-5p         | 1 |
| <i>circC1orf27</i> | miR-6734-5p         | 1 |
| <i>circC1orf27</i> | miR-6735-3p         | 1 |
| <i>circC1orf27</i> | miR-6738-3p         | 1 |
| <i>circC1orf27</i> | miR-6740-3p         | 1 |
| <i>circC1orf27</i> | miR-6740-5p         | 1 |
| <i>circC1orf27</i> | miR-6742-3p         | 1 |
| <i>circC1orf27</i> | miR-6744-5p         | 4 |
| <i>circC1orf27</i> | miR-6749-5p         | 2 |
| <i>circC1orf27</i> | miR-675-3p          | 1 |
| <i>circC1orf27</i> | miR-6758-3p         | 5 |
| <i>circC1orf27</i> | miR-676-3p          | 3 |
| <i>circC1orf27</i> | miR-6760-3p         | 1 |
| <i>circC1orf27</i> | miR-6761-5p         | 1 |
| <i>circC1orf27</i> | miR-6762-3p         | 3 |
| <i>circC1orf27</i> | miR-6764-3p/6824-3p | 4 |
| <i>circC1orf27</i> | miR-6765-5p         | 1 |
| <i>circC1orf27</i> | miR-6767-3p         | 1 |
| <i>circC1orf27</i> | miR-6768-5p         | 1 |
| <i>circC1orf27</i> | miR-6769a-3p        | 2 |
| <i>circC1orf27</i> | miR-6772-3p         | 2 |
| <i>circC1orf27</i> | miR-6773-3p         | 3 |
| <i>circC1orf27</i> | miR-6776-5p         | 1 |
| <i>circC1orf27</i> | miR-6778-3p         | 1 |
| <i>circC1orf27</i> | miR-6780b-3p        | 1 |
| <i>circC1orf27</i> | miR-6784-3p/6862-3p | 3 |
| <i>circC1orf27</i> | miR-6787-3p         | 2 |
| <i>circC1orf27</i> | miR-6791-3p/6829-3p | 1 |
| <i>circC1orf27</i> | miR-6796-3p         | 1 |
| <i>circC1orf27</i> | miR-6798-3p         | 1 |
| <i>circC1orf27</i> | miR-6802-3p         | 4 |
| <i>circC1orf27</i> | miR-6803-3p         | 1 |
| <i>circC1orf27</i> | miR-6807-5p         | 2 |

|                    |                     |   |
|--------------------|---------------------|---|
| <i>circC1orf27</i> | miR-6809-3p         | 6 |
| <i>circC1orf27</i> | miR-6811-3p         | 2 |
| <i>circC1orf27</i> | miR-6813-3p         | 2 |
| <i>circC1orf27</i> | miR-6817-3p         | 2 |
| <i>circC1orf27</i> | miR-6818-3p         | 3 |
| <i>circC1orf27</i> | miR-6819-3p/6877-3p | 4 |
| <i>circC1orf27</i> | miR-6828-5p         | 2 |
| <i>circC1orf27</i> | miR-6830-3p         | 1 |
| <i>circC1orf27</i> | miR-6831-3p         | 2 |
| <i>circC1orf27</i> | miR-6832-5p         | 2 |
| <i>circC1orf27</i> | miR-6834-3p         | 3 |
| <i>circC1orf27</i> | miR-6834-5p         | 1 |
| <i>circC1orf27</i> | miR-6836-3p         | 6 |
| <i>circC1orf27</i> | miR-6840-3p         | 3 |
| <i>circC1orf27</i> | miR-6842-3p         | 3 |
| <i>circC1orf27</i> | miR-6843-3p/6848-3p | 2 |
| <i>circC1orf27</i> | miR-6844            | 3 |
| <i>circC1orf27</i> | miR-6845-3p         | 1 |
| <i>circC1orf27</i> | miR-6847-5p         | 1 |
| <i>circC1orf27</i> | miR-6849-3p         | 2 |
| <i>circC1orf27</i> | miR-6852-5p         | 1 |
| <i>circC1orf27</i> | miR-6861-5p         | 1 |
| <i>circC1orf27</i> | miR-6865-3p         | 3 |
| <i>circC1orf27</i> | miR-6866-5p         | 1 |
| <i>circC1orf27</i> | miR-6867-3p         | 1 |
| <i>circC1orf27</i> | miR-6871-5p         | 1 |
| <i>circC1orf27</i> | miR-6879-3p         | 1 |
| <i>circC1orf27</i> | miR-6883-3p         | 1 |
| <i>circC1orf27</i> | miR-6884-3p         | 4 |
| <i>circC1orf27</i> | miR-6888-3p         | 3 |
| <i>circC1orf27</i> | miR-6890-3p         | 2 |
| <i>circC1orf27</i> | miR-6892-3p         | 2 |
| <i>circC1orf27</i> | miR-6894-3p         | 2 |
| <i>circC1orf27</i> | miR-6895-3p         | 2 |
| <i>circC1orf27</i> | miR-7-3p            | 2 |
| <i>circC1orf27</i> | miR-7108-5p         | 1 |
| <i>circC1orf27</i> | miR-7109-3p         | 1 |
| <i>circC1orf27</i> | miR-7110-3p         | 2 |

|                    |             |   |
|--------------------|-------------|---|
| <i>circC1orf27</i> | miR-7112-3p | 3 |
| <i>circC1orf27</i> | miR-7113-3p | 2 |
| <i>circC1orf27</i> | miR-7114-5p | 1 |
| <i>circC1orf27</i> | miR-7150    | 4 |
| <i>circC1orf27</i> | miR-7152-3p | 2 |
| <i>circC1orf27</i> | miR-7152-5p | 2 |
| <i>circC1orf27</i> | miR-7153-3p | 1 |
| <i>circC1orf27</i> | miR-7154-5p | 1 |
| <i>circC1orf27</i> | miR-7156-3p | 3 |
| <i>circC1orf27</i> | miR-7158-3p | 1 |
| <i>circC1orf27</i> | miR-7159-5p | 2 |
| <i>circC1orf27</i> | miR-7160-5p | 2 |
| <i>circC1orf27</i> | miR-7161-3p | 4 |
| <i>circC1orf27</i> | miR-7162-3p | 3 |
| <i>circC1orf27</i> | miR-744-3p  | 4 |
| <i>circC1orf27</i> | miR-758-3p  | 3 |
| <i>circC1orf27</i> | miR-764     | 1 |
| <i>circC1orf27</i> | miR-7641    | 3 |
| <i>circC1orf27</i> | miR-767-3p  | 1 |
| <i>circC1orf27</i> | miR-7705    | 2 |
| <i>circC1orf27</i> | miR-7848-3p | 1 |
| <i>circC1orf27</i> | miR-7849-3p | 1 |
| <i>circC1orf27</i> | miR-7855-5p | 1 |
| <i>circC1orf27</i> | miR-7975    | 2 |
| <i>circC1orf27</i> | miR-7977    | 2 |
| <i>circC1orf27</i> | miR-7978    | 1 |
| <i>circC1orf27</i> | miR-802     | 1 |
| <i>circC1orf27</i> | miR-8055    | 1 |
| <i>circC1orf27</i> | miR-8062    | 1 |
| <i>circC1orf27</i> | miR-8065    | 1 |
| <i>circC1orf27</i> | miR-8075    | 1 |
| <i>circC1orf27</i> | miR-8077    | 2 |
| <i>circC1orf27</i> | miR-8078    | 1 |
| <i>circC1orf27</i> | miR-8081    | 1 |
| <i>circC1orf27</i> | miR-8084    | 1 |
| <i>circC1orf27</i> | miR-8086    | 3 |
| <i>circC1orf27</i> | miR-8485    | 4 |
| <i>circC1orf27</i> | miR-875-3p  | 3 |

|                    |                         |   |
|--------------------|-------------------------|---|
| <i>circC1orf27</i> | miR-875-5p              | 2 |
| <i>circC1orf27</i> | miR-876-5p              | 1 |
| <i>circC1orf27</i> | miR-877-3p              | 1 |
| <i>circC1orf27</i> | miR-877-5p              | 1 |
| <i>circC1orf27</i> | miR-885-3p              | 6 |
| <i>circC1orf27</i> | miR-887-5p              | 1 |
| <i>circC1orf27</i> | miR-891a-3p             | 1 |
| <i>circC1orf27</i> | miR-892-5p              | 3 |
| <i>circC1orf27</i> | miR-892b                | 3 |
| <i>circC1orf27</i> | miR-9-3p                | 2 |
| <i>circC1orf27</i> | miR-922                 | 3 |
| <i>circC1orf27</i> | miR-924                 | 2 |
| <i>circC1orf27</i> | miR-936                 | 2 |
| <i>circC1orf27</i> | miR-937-5p              | 2 |
| <i>circC1orf27</i> | miR-939-3p              | 1 |
| <i>circC1orf27</i> | miR-940/6808-5p/6893-5p | 2 |
| <i>circC1orf27</i> | miR-942-5p              | 6 |
| <i>circC1orf27</i> | miR-943                 | 1 |
| <i>circC1orf27</i> | miR-944                 | 1 |
| <i>circC1orf27</i> | miR-96-3p               | 5 |
| <i>circC1orf27</i> | miR-99-3p               | 1 |
| <i>circCADPS</i>   | let-7-5p/98-5p          | 1 |
| <i>circCADPS</i>   | miR-10-5p               | 1 |
| <i>circCADPS</i>   | miR-103-3p/107          | 3 |
| <i>circCADPS</i>   | miR-103a-2-5p           | 1 |
| <i>circCADPS</i>   | miR-105-3p              | 1 |
| <i>circCADPS</i>   | miR-105-5p              | 2 |
| <i>circCADPS</i>   | miR-1202/3972           | 1 |
| <i>circCADPS</i>   | miR-1207-3p             | 2 |
| <i>circCADPS</i>   | miR-122-5p              | 2 |
| <i>circCADPS</i>   | miR-1224-3p             | 1 |
| <i>circCADPS</i>   | miR-1227-3p             | 1 |
| <i>circCADPS</i>   | miR-1228-3p             | 1 |
| <i>circCADPS</i>   | miR-1233-5p/6778-5p     | 1 |
| <i>circCADPS</i>   | miR-1236-3p             | 1 |
| <i>circCADPS</i>   | miR-1236-5p             | 1 |
| <i>circCADPS</i>   | miR-1238-5p/4758-5p     | 1 |
| <i>circCADPS</i>   | miR-124-3p.1            | 2 |

|                  |                          |   |
|------------------|--------------------------|---|
| <i>circCADPS</i> | miR-124-3p.2/506-3p      | 1 |
| <i>circCADPS</i> | miR-124-5p               | 2 |
| <i>circCADPS</i> | miR-1243                 | 1 |
| <i>circCADPS</i> | miR-1244                 | 1 |
| <i>circCADPS</i> | miR-1245a/8079           | 1 |
| <i>circCADPS</i> | miR-1245b-5p             | 1 |
| <i>circCADPS</i> | miR-1246                 | 3 |
| <i>circCADPS</i> | miR-1249-3p              | 2 |
| <i>circCADPS</i> | miR-1250-3p              | 3 |
| <i>circCADPS</i> | miR-1251-5p              | 2 |
| <i>circCADPS</i> | miR-1252-3p              | 5 |
| <i>circCADPS</i> | miR-1252-5p              | 1 |
| <i>circCADPS</i> | miR-1253                 | 1 |
| <i>circCADPS</i> | miR-1255a/1255b-5p       | 1 |
| <i>circCADPS</i> | miR-1260a/1260b          | 5 |
| <i>circCADPS</i> | miR-1265                 | 1 |
| <i>circCADPS</i> | miR-1266-5p/4518         | 1 |
| <i>circCADPS</i> | miR-1270                 | 1 |
| <i>circCADPS</i> | miR-1272                 | 2 |
| <i>circCADPS</i> | miR-1273d                | 1 |
| <i>circCADPS</i> | miR-1273e                | 1 |
| <i>circCADPS</i> | miR-128-3p               | 3 |
| <i>circCADPS</i> | miR-1287-5p              | 3 |
| <i>circCADPS</i> | miR-1288-5p              | 2 |
| <i>circCADPS</i> | miR-1289                 | 1 |
| <i>circCADPS</i> | miR-1293/4483            | 1 |
| <i>circCADPS</i> | miR-1298-3p              | 2 |
| <i>circCADPS</i> | miR-1298-5p              | 2 |
| <i>circCADPS</i> | miR-1299                 | 1 |
| <i>circCADPS</i> | miR-130-3p/301-3p/454-3p | 1 |
| <i>circCADPS</i> | miR-1301-3p              | 3 |
| <i>circCADPS</i> | miR-1302/4298            | 1 |
| <i>circCADPS</i> | miR-1303                 | 1 |
| <i>circCADPS</i> | miR-1305                 | 1 |
| <i>circCADPS</i> | miR-130b-5p              | 1 |
| <i>circCADPS</i> | miR-132-3p/212-3p        | 1 |
| <i>circCADPS</i> | miR-1322                 | 2 |
| <i>circCADPS</i> | miR-1323                 | 3 |

|                  |                                     |   |
|------------------|-------------------------------------|---|
| <i>circCADPS</i> | miR-133a-5p                         | 1 |
| <i>circCADPS</i> | miR-134-3p                          | 1 |
| <i>circCADPS</i> | miR-1343-3p                         | 1 |
| <i>circCADPS</i> | miR-135-5p                          | 3 |
| <i>circCADPS</i> | miR-136-5p                          | 1 |
| <i>circCADPS</i> | miR-138-5p                          | 1 |
| <i>circCADPS</i> | miR-140-3p.1                        | 3 |
| <i>circCADPS</i> | miR-141-3p/200-3p                   | 2 |
| <i>circCADPS</i> | miR-142-3p.1                        | 1 |
| <i>circCADPS</i> | miR-143-5p                          | 1 |
| <i>circCADPS</i> | miR-145-3p                          | 1 |
| <i>circCADPS</i> | miR-146-5p                          | 1 |
| <i>circCADPS</i> | miR-1468-3p                         | 4 |
| <i>circCADPS</i> | miR-1470                            | 2 |
| <i>circCADPS</i> | miR-148-3p/152-3p                   | 1 |
| <i>circCADPS</i> | miR-148b-5p/6874-3p                 | 1 |
| <i>circCADPS</i> | miR-149-5p                          | 1 |
| <i>circCADPS</i> | miR-150-5p                          | 1 |
| <i>circCADPS</i> | miR-152-5p                          | 2 |
| <i>circCADPS</i> | miR-153-5p                          | 2 |
| <i>circCADPS</i> | miR-1537-5p                         | 1 |
| <i>circCADPS</i> | miR-15a-3p                          | 1 |
| <i>circCADPS</i> | miR-16-1-3p                         | 1 |
| <i>circCADPS</i> | miR-16-2-3p/195-3p                  | 3 |
| <i>circCADPS</i> | miR-17-5p/20-5p/93-5p/106-5p/519-3p | 1 |
| <i>circCADPS</i> | miR-181c-3p                         | 1 |
| <i>circCADPS</i> | miR-183-3p                          | 1 |
| <i>circCADPS</i> | miR-183-5p.1                        | 4 |
| <i>circCADPS</i> | miR-185-5p                          | 1 |
| <i>circCADPS</i> | miR-186-5p                          | 6 |
| <i>circCADPS</i> | miR-188-3p                          | 5 |
| <i>circCADPS</i> | miR-188-5p                          | 3 |
| <i>circCADPS</i> | miR-18a-3p                          | 1 |
| <i>circCADPS</i> | miR-19-5p                           | 2 |
| <i>circCADPS</i> | miR-190-5p                          | 1 |
| <i>circCADPS</i> | miR-1909-5p                         | 1 |
| <i>circCADPS</i> | miR-190a-3p                         | 2 |
| <i>circCADPS</i> | miR-1910-3p/6511a-5p                | 1 |

|                  |                    |   |
|------------------|--------------------|---|
| <i>circCADPS</i> | miR-1911-3p        | 1 |
| <i>circCADPS</i> | miR-192-3p         | 5 |
| <i>circCADPS</i> | miR-193-3p         | 2 |
| <i>circCADPS</i> | miR-193b-5p        | 1 |
| <i>circCADPS</i> | miR-196b-3p        | 1 |
| <i>circCADPS</i> | miR-197-5p/3132    | 1 |
| <i>circCADPS</i> | miR-1972           | 1 |
| <i>circCADPS</i> | miR-200ab-5p       | 2 |
| <i>circCADPS</i> | miR-203a-3p.1      | 6 |
| <i>circCADPS</i> | miR-203b-3p        | 1 |
| <i>circCADPS</i> | miR-204-3p/4646-5p | 1 |
| <i>circCADPS</i> | miR-205-5p         | 4 |
| <i>circCADPS</i> | miR-2052           | 2 |
| <i>circCADPS</i> | miR-2053           | 2 |
| <i>circCADPS</i> | miR-20b-3p         | 1 |
| <i>circCADPS</i> | miR-2113           | 1 |
| <i>circCADPS</i> | miR-2114-5p        | 3 |
| <i>circCADPS</i> | miR-2115-5p        | 1 |
| <i>circCADPS</i> | miR-2116-3p        | 1 |
| <i>circCADPS</i> | miR-2116-5p        | 1 |
| <i>circCADPS</i> | miR-2117           | 1 |
| <i>circCADPS</i> | miR-214-3p/3619-5p | 1 |
| <i>circCADPS</i> | miR-215-3p         | 2 |
| <i>circCADPS</i> | miR-216b-3p        | 1 |
| <i>circCADPS</i> | miR-218-5p         | 1 |
| <i>circCADPS</i> | miR-219a-1-3p      | 1 |
| <i>circCADPS</i> | miR-22-3p          | 3 |
| <i>circCADPS</i> | miR-22-5p          | 1 |
| <i>circCADPS</i> | miR-222-5p         | 1 |
| <i>circCADPS</i> | miR-223-3p         | 1 |
| <i>circCADPS</i> | miR-224-5p         | 2 |
| <i>circCADPS</i> | miR-2276-3p        | 3 |
| <i>circCADPS</i> | miR-2276-5p        | 3 |
| <i>circCADPS</i> | miR-2277-3p        | 1 |
| <i>circCADPS</i> | miR-23-3p          | 1 |
| <i>circCADPS</i> | miR-2355-5p        | 2 |
| <i>circCADPS</i> | miR-2392           | 4 |
| <i>circCADPS</i> | miR-24-5p          | 2 |



|                  |                                     |   |
|------------------|-------------------------------------|---|
| <i>circCADPS</i> | miR-2467-5p                         | 1 |
| <i>circCADPS</i> | miR-25-3p/32-5p/92-3p/363-3p/367-3p | 3 |
| <i>circCADPS</i> | miR-26-5p                           | 1 |
| <i>circCADPS</i> | miR-2681-3p                         | 1 |
| <i>circCADPS</i> | miR-27b-5p                          | 1 |
| <i>circCADPS</i> | miR-29-3p                           | 3 |
| <i>circCADPS</i> | miR-296-3p                          | 1 |
| <i>circCADPS</i> | miR-299-3p                          | 2 |
| <i>circCADPS</i> | miR-30-3p                           | 1 |
| <i>circCADPS</i> | miR-302-3p/372-3p/373-3p/520-3p     | 1 |
| <i>circCADPS</i> | miR-302a-5p                         | 1 |
| <i>circCADPS</i> | miR-302b-5p/302d-5p                 | 1 |
| <i>circCADPS</i> | miR-302c-3p.2/520-3p                | 1 |
| <i>circCADPS</i> | miR-302c-5p                         | 2 |
| <i>circCADPS</i> | miR-3064-3p                         | 1 |
| <i>circCADPS</i> | miR-3064-5p                         | 2 |
| <i>circCADPS</i> | miR-3065-5p                         | 3 |
| <i>circCADPS</i> | miR-3074-5p                         | 1 |
| <i>circCADPS</i> | miR-31-5p                           | 4 |
| <i>circCADPS</i> | miR-3117-5p                         | 1 |
| <i>circCADPS</i> | miR-3119                            | 2 |
| <i>circCADPS</i> | miR-3120-3p                         | 1 |
| <i>circCADPS</i> | miR-3121-3p                         | 2 |
| <i>circCADPS</i> | miR-3125/3916/6859-5p               | 1 |
| <i>circCADPS</i> | miR-3126-3p                         | 2 |
| <i>circCADPS</i> | miR-3127-5p                         | 1 |
| <i>circCADPS</i> | miR-3128                            | 1 |
| <i>circCADPS</i> | miR-3129-3p/5583-5p                 | 3 |
| <i>circCADPS</i> | miR-3130-3p                         | 3 |
| <i>circCADPS</i> | miR-3133                            | 6 |
| <i>circCADPS</i> | miR-3135b                           | 3 |
| <i>circCADPS</i> | miR-3137                            | 1 |
| <i>circCADPS</i> | miR-3138                            | 1 |
| <i>circCADPS</i> | miR-3140-5p                         | 2 |
| <i>circCADPS</i> | miR-3143                            | 3 |
| <i>circCADPS</i> | miR-3146                            | 1 |
| <i>circCADPS</i> | miR-3147                            | 1 |
| <i>circCADPS</i> | miR-3148                            | 1 |

|                  |                           |   |
|------------------|---------------------------|---|
| <i>circCADPS</i> | miR-3153/6733-5p/6739-5p  | 1 |
| <i>circCADPS</i> | miR-3154                  | 1 |
| <i>circCADPS</i> | miR-3156-3p               | 5 |
| <i>circCADPS</i> | miR-3156-5p               | 3 |
| <i>circCADPS</i> | miR-3157-3p               | 1 |
| <i>circCADPS</i> | miR-3159                  | 3 |
| <i>circCADPS</i> | miR-3161                  | 2 |
| <i>circCADPS</i> | miR-3168                  | 1 |
| <i>circCADPS</i> | miR-3170/6855-5p          | 1 |
| <i>circCADPS</i> | miR-3171                  | 2 |
| <i>circCADPS</i> | miR-3173-3p/6891-5p       | 1 |
| <i>circCADPS</i> | miR-3176/3922-3p          | 2 |
| <i>circCADPS</i> | miR-3179                  | 3 |
| <i>circCADPS</i> | miR-3180-5p               | 1 |
| <i>circCADPS</i> | miR-3185                  | 5 |
| <i>circCADPS</i> | miR-3187-3p               | 1 |
| <i>circCADPS</i> | miR-3188                  | 1 |
| <i>circCADPS</i> | miR-3190-5p               | 2 |
| <i>circCADPS</i> | miR-3192-5p               | 1 |
| <i>circCADPS</i> | miR-3194-5p               | 1 |
| <i>circCADPS</i> | miR-3198/4309             | 3 |
| <i>circCADPS</i> | miR-3199/8052             | 2 |
| <i>circCADPS</i> | miR-32-3p                 | 1 |
| <i>circCADPS</i> | miR-320                   | 3 |
| <i>circCADPS</i> | miR-3200-5p               | 1 |
| <i>circCADPS</i> | miR-3202                  | 2 |
| <i>circCADPS</i> | miR-320e                  | 3 |
| <i>circCADPS</i> | miR-323-3p                | 1 |
| <i>circCADPS</i> | miR-323b-5p/410-5p/494-5p | 1 |
| <i>circCADPS</i> | miR-324-3p/1913           | 1 |
| <i>circCADPS</i> | miR-324-5p                | 2 |
| <i>circCADPS</i> | miR-329-3p/362-3p         | 1 |
| <i>circCADPS</i> | miR-33-5p                 | 4 |
| <i>circCADPS</i> | miR-330-3p                | 3 |
| <i>circCADPS</i> | miR-330-3p.2              | 3 |
| <i>circCADPS</i> | miR-335-3p                | 2 |
| <i>circCADPS</i> | miR-335-5p                | 4 |
| <i>circCADPS</i> | miR-338-3p                | 1 |

|                  |                           |   |
|------------------|---------------------------|---|
| <i>circCADPS</i> | miR-339-5p                | 1 |
| <i>circCADPS</i> | miR-33a-3p                | 4 |
| <i>circCADPS</i> | miR-33b-3p/515-3p/519e-3p | 1 |
| <i>circCADPS</i> | miR-340-5p                | 2 |
| <i>circCADPS</i> | miR-342-5p/4664-5p        | 1 |
| <i>circCADPS</i> | miR-345-3p                | 2 |
| <i>circCADPS</i> | miR-346                   | 1 |
| <i>circCADPS</i> | miR-34b-3p                | 1 |
| <i>circCADPS</i> | miR-34b-5p/449c-5p        | 1 |
| <i>circCADPS</i> | miR-34c-3p                | 1 |
| <i>circCADPS</i> | miR-3607-3p               | 1 |
| <i>circCADPS</i> | miR-3607-5p               | 1 |
| <i>circCADPS</i> | miR-3611                  | 4 |
| <i>circCADPS</i> | miR-3613-3p               | 5 |
| <i>circCADPS</i> | miR-3614-3p               | 1 |
| <i>circCADPS</i> | miR-3614-5p               | 1 |
| <i>circCADPS</i> | miR-3618                  | 1 |
| <i>circCADPS</i> | miR-3622a-3p/3622b-3p     | 4 |
| <i>circCADPS</i> | miR-3622a-5p              | 2 |
| <i>circCADPS</i> | miR-3622b-5p              | 1 |
| <i>circCADPS</i> | miR-363-5p/6745           | 1 |
| <i>circCADPS</i> | miR-3646                  | 5 |
| <i>circCADPS</i> | miR-3649                  | 2 |
| <i>circCADPS</i> | miR-365-3p                | 3 |
| <i>circCADPS</i> | miR-3652/4430             | 3 |
| <i>circCADPS</i> | miR-3654                  | 1 |
| <i>circCADPS</i> | miR-3655                  | 1 |
| <i>circCADPS</i> | miR-3658                  | 2 |
| <i>circCADPS</i> | miR-3659                  | 1 |
| <i>circCADPS</i> | miR-365a-5p/365b-5p       | 2 |
| <i>circCADPS</i> | miR-3662                  | 1 |
| <i>circCADPS</i> | miR-3664-3p               | 1 |
| <i>circCADPS</i> | miR-3665                  | 1 |
| <i>circCADPS</i> | miR-3667-3p               | 3 |
| <i>circCADPS</i> | miR-3668                  | 1 |
| <i>circCADPS</i> | miR-3672/6864-3p          | 1 |
| <i>circCADPS</i> | miR-3675-3p               | 1 |
| <i>circCADPS</i> | miR-3677-5p               | 2 |

|                  |                     |   |
|------------------|---------------------|---|
| <i>circCADPS</i> | miR-3680-3p         | 3 |
| <i>circCADPS</i> | miR-3688-3p         | 3 |
| <i>circCADPS</i> | miR-3690            | 4 |
| <i>circCADPS</i> | miR-3691-3p         | 1 |
| <i>circCADPS</i> | miR-3691-5p         | 2 |
| <i>circCADPS</i> | miR-370-3p          | 1 |
| <i>circCADPS</i> | miR-3714            | 2 |
| <i>circCADPS</i> | miR-371a-3p         | 1 |
| <i>circCADPS</i> | miR-371b-3p         | 1 |
| <i>circCADPS</i> | miR-374-5p          | 2 |
| <i>circCADPS</i> | miR-374a-3p         | 1 |
| <i>circCADPS</i> | miR-374b-3p         | 1 |
| <i>circCADPS</i> | miR-374c-3p         | 1 |
| <i>circCADPS</i> | miR-375             | 1 |
| <i>circCADPS</i> | miR-376a-2-5p       | 1 |
| <i>circCADPS</i> | miR-376a-5p         | 1 |
| <i>circCADPS</i> | miR-378-3p          | 2 |
| <i>circCADPS</i> | miR-379-5p          | 1 |
| <i>circCADPS</i> | miR-380-3p          | 1 |
| <i>circCADPS</i> | miR-380-5p/563      | 3 |
| <i>circCADPS</i> | miR-382-5p          | 5 |
| <i>circCADPS</i> | miR-383-5p.2        | 1 |
| <i>circCADPS</i> | miR-3910            | 2 |
| <i>circCADPS</i> | miR-3914            | 1 |
| <i>circCADPS</i> | miR-3926            | 3 |
| <i>circCADPS</i> | miR-3928-3p         | 1 |
| <i>circCADPS</i> | miR-3929/4419b/4478 | 1 |
| <i>circCADPS</i> | miR-3935            | 2 |
| <i>circCADPS</i> | miR-3936            | 1 |
| <i>circCADPS</i> | miR-3941            | 2 |
| <i>circCADPS</i> | miR-3942-3p         | 4 |
| <i>circCADPS</i> | miR-3973            | 3 |
| <i>circCADPS</i> | miR-3975            | 1 |
| <i>circCADPS</i> | miR-3978            | 7 |
| <i>circCADPS</i> | miR-411-5p.1        | 1 |
| <i>circCADPS</i> | miR-412-3p/6754-3p  | 1 |
| <i>circCADPS</i> | miR-421             | 6 |
| <i>circCADPS</i> | miR-425-3p          | 2 |

|                  |                       |   |
|------------------|-----------------------|---|
| <i>circCADPS</i> | miR-4251              | 2 |
| <i>circCADPS</i> | miR-4254              | 4 |
| <i>circCADPS</i> | miR-4255              | 2 |
| <i>circCADPS</i> | miR-4259              | 1 |
| <i>circCADPS</i> | miR-4260              | 1 |
| <i>circCADPS</i> | miR-4261              | 2 |
| <i>circCADPS</i> | miR-4263              | 1 |
| <i>circCADPS</i> | miR-4265/4296/4322    | 1 |
| <i>circCADPS</i> | miR-4267              | 1 |
| <i>circCADPS</i> | miR-4269/6715b-5p     | 2 |
| <i>circCADPS</i> | miR-4270/4441/6754-5p | 1 |
| <i>circCADPS</i> | miR-4272              | 2 |
| <i>circCADPS</i> | miR-4273/7156-5p      | 1 |
| <i>circCADPS</i> | miR-4282              | 2 |
| <i>circCADPS</i> | miR-4286              | 1 |
| <i>circCADPS</i> | miR-4290              | 1 |
| <i>circCADPS</i> | miR-4294              | 1 |
| <i>circCADPS</i> | miR-4299              | 1 |
| <i>circCADPS</i> | miR-4303              | 1 |
| <i>circCADPS</i> | miR-4307              | 3 |
| <i>circCADPS</i> | miR-4310/7157-5p      | 3 |
| <i>circCADPS</i> | miR-4312              | 1 |
| <i>circCADPS</i> | miR-4314              | 1 |
| <i>circCADPS</i> | miR-432-3p            | 4 |
| <i>circCADPS</i> | miR-432-5p            | 2 |
| <i>circCADPS</i> | miR-4325              | 2 |
| <i>circCADPS</i> | miR-4328              | 1 |
| <i>circCADPS</i> | miR-4329              | 2 |
| <i>circCADPS</i> | miR-4330              | 2 |
| <i>circCADPS</i> | miR-4422              | 3 |
| <i>circCADPS</i> | miR-4423-3p           | 2 |
| <i>circCADPS</i> | miR-4425              | 1 |
| <i>circCADPS</i> | miR-4427              | 1 |
| <i>circCADPS</i> | miR-4428              | 1 |
| <i>circCADPS</i> | miR-4433a-5p          | 4 |
| <i>circCADPS</i> | miR-4433b-3p          | 1 |
| <i>circCADPS</i> | miR-4433b-5p          | 1 |
| <i>circCADPS</i> | miR-4434/4516/5703    | 1 |

|                  |                   |   |
|------------------|-------------------|---|
| <i>circCADPS</i> | miR-4435          | 1 |
| <i>circCADPS</i> | miR-4444          | 3 |
| <i>circCADPS</i> | miR-4446-5p       | 2 |
| <i>circCADPS</i> | miR-4450          | 1 |
| <i>circCADPS</i> | miR-4451          | 1 |
| <i>circCADPS</i> | miR-4452          | 1 |
| <i>circCADPS</i> | miR-4456          | 1 |
| <i>circCADPS</i> | miR-4460          | 1 |
| <i>circCADPS</i> | miR-4470          | 1 |
| <i>circCADPS</i> | miR-4474-5p       | 1 |
| <i>circCADPS</i> | miR-4475          | 1 |
| <i>circCADPS</i> | miR-4480          | 4 |
| <i>circCADPS</i> | miR-4485-3p       | 4 |
| <i>circCADPS</i> | miR-4491/4657     | 2 |
| <i>circCADPS</i> | miR-4493          | 1 |
| <i>circCADPS</i> | miR-4494          | 1 |
| <i>circCADPS</i> | miR-4496          | 2 |
| <i>circCADPS</i> | miR-449c-3p       | 1 |
| <i>circCADPS</i> | miR-4501          | 4 |
| <i>circCADPS</i> | miR-4502          | 1 |
| <i>circCADPS</i> | miR-4503          | 4 |
| <i>circCADPS</i> | miR-4504          | 5 |
| <i>circCADPS</i> | miR-4505/5787     | 3 |
| <i>circCADPS</i> | miR-4506          | 5 |
| <i>circCADPS</i> | miR-450a-2-3p     | 1 |
| <i>circCADPS</i> | miR-450b-5p       | 3 |
| <i>circCADPS</i> | miR-4511          | 2 |
| <i>circCADPS</i> | miR-4514/4692     | 2 |
| <i>circCADPS</i> | miR-4517          | 4 |
| <i>circCADPS</i> | miR-452-5p/892-3p | 2 |
| <i>circCADPS</i> | miR-4520-3p       | 2 |
| <i>circCADPS</i> | miR-4521          | 2 |
| <i>circCADPS</i> | miR-4524a-3p      | 1 |
| <i>circCADPS</i> | miR-4529-5p       | 1 |
| <i>circCADPS</i> | miR-4530          | 1 |
| <i>circCADPS</i> | miR-4531          | 1 |
| <i>circCADPS</i> | miR-4533          | 2 |
| <i>circCADPS</i> | miR-4535          | 1 |

|                  |                       |   |
|------------------|-----------------------|---|
| <i>circCADPS</i> | miR-455-3p.2          | 1 |
| <i>circCADPS</i> | miR-455-5p            | 1 |
| <i>circCADPS</i> | miR-4638-3p           | 2 |
| <i>circCADPS</i> | miR-4639-3p           | 3 |
| <i>circCADPS</i> | miR-4639-5p           | 2 |
| <i>circCADPS</i> | miR-4640-5p           | 3 |
| <i>circCADPS</i> | miR-4643              | 1 |
| <i>circCADPS</i> | miR-4645-5p/4673      | 1 |
| <i>circCADPS</i> | miR-4648              | 1 |
| <i>circCADPS</i> | miR-4650-3p           | 1 |
| <i>circCADPS</i> | miR-4650-5p           | 1 |
| <i>circCADPS</i> | miR-4652-3p           | 2 |
| <i>circCADPS</i> | miR-4653-3p           | 1 |
| <i>circCADPS</i> | miR-4654/4769-5p      | 1 |
| <i>circCADPS</i> | miR-4658/6790-5p      | 1 |
| <i>circCADPS</i> | miR-4659a-3p/4659b-3p | 1 |
| <i>circCADPS</i> | miR-4659a-5p/4659b-5p | 1 |
| <i>circCADPS</i> | miR-4660              | 1 |
| <i>circCADPS</i> | miR-4661-3p           | 1 |
| <i>circCADPS</i> | miR-4663              | 1 |
| <i>circCADPS</i> | miR-4667-3p           | 2 |
| <i>circCADPS</i> | miR-4668-5p           | 1 |
| <i>circCADPS</i> | miR-4670-3p           | 8 |
| <i>circCADPS</i> | miR-4672              | 2 |
| <i>circCADPS</i> | miR-4677-5p           | 1 |
| <i>circCADPS</i> | miR-4680-3p           | 1 |
| <i>circCADPS</i> | miR-4684-3p           | 2 |
| <i>circCADPS</i> | miR-4684-5p           | 2 |
| <i>circCADPS</i> | miR-4687-3p           | 2 |
| <i>circCADPS</i> | miR-4690-5p           | 1 |
| <i>circCADPS</i> | miR-4691-3p           | 1 |
| <i>circCADPS</i> | miR-4693-3p           | 1 |
| <i>circCADPS</i> | miR-4694-3p           | 3 |
| <i>circCADPS</i> | miR-4695-3p           | 1 |
| <i>circCADPS</i> | miR-4696              | 1 |
| <i>circCADPS</i> | miR-4697-3p           | 1 |
| <i>circCADPS</i> | miR-4698              | 2 |
| <i>circCADPS</i> | miR-4699-3p           | 1 |

|                  |                             |   |
|------------------|-----------------------------|---|
| <i>circCADPS</i> | miR-4699-5p                 | 2 |
| <i>circCADPS</i> | miR-4704-3p                 | 4 |
| <i>circCADPS</i> | miR-4705                    | 3 |
| <i>circCADPS</i> | miR-4709-3p                 | 4 |
| <i>circCADPS</i> | miR-4709-5p                 | 3 |
| <i>circCADPS</i> | miR-4711-3p                 | 2 |
| <i>circCADPS</i> | miR-4711-5p                 | 2 |
| <i>circCADPS</i> | miR-4712-3p                 | 1 |
| <i>circCADPS</i> | miR-4715-5p                 | 1 |
| <i>circCADPS</i> | miR-4716-5p                 | 3 |
| <i>circCADPS</i> | miR-4717-5p                 | 1 |
| <i>circCADPS</i> | miR-4718                    | 1 |
| <i>circCADPS</i> | miR-4719                    | 3 |
| <i>circCADPS</i> | miR-4720-5p/4799-3p/5588-5p | 1 |
| <i>circCADPS</i> | miR-4722-3p/6727-3p         | 1 |
| <i>circCADPS</i> | miR-4724-3p                 | 1 |
| <i>circCADPS</i> | miR-4727-3p                 | 1 |
| <i>circCADPS</i> | miR-4729                    | 1 |
| <i>circCADPS</i> | miR-4733-5p                 | 2 |
| <i>circCADPS</i> | miR-4735-5p                 | 3 |
| <i>circCADPS</i> | miR-4738-3p                 | 5 |
| <i>circCADPS</i> | miR-4742-5p                 | 2 |
| <i>circCADPS</i> | miR-4743-3p                 | 2 |
| <i>circCADPS</i> | miR-4747-5p/5196-5p         | 1 |
| <i>circCADPS</i> | miR-4752                    | 3 |
| <i>circCADPS</i> | miR-4754                    | 2 |
| <i>circCADPS</i> | miR-4755-3p                 | 1 |
| <i>circCADPS</i> | miR-4755-5p/5006-3p         | 1 |
| <i>circCADPS</i> | miR-4757-3p                 | 1 |
| <i>circCADPS</i> | miR-4760-5p/8061            | 1 |
| <i>circCADPS</i> | miR-4762-3p                 | 1 |
| <i>circCADPS</i> | miR-4762-5p                 | 2 |
| <i>circCADPS</i> | miR-4764-5p                 | 2 |
| <i>circCADPS</i> | miR-4765                    | 1 |
| <i>circCADPS</i> | miR-4768-5p/6833-3p         | 1 |
| <i>circCADPS</i> | miR-4769-3p/6817-5p         | 1 |
| <i>circCADPS</i> | miR-4772-3p                 | 3 |
| <i>circCADPS</i> | miR-4773                    | 1 |



|                  |                   |   |
|------------------|-------------------|---|
| <i>circCADPS</i> | miR-4776-3p       | 1 |
| <i>circCADPS</i> | miR-4776-5p       | 1 |
| <i>circCADPS</i> | miR-4778-3p       | 2 |
| <i>circCADPS</i> | miR-4782-5p/5706  | 1 |
| <i>circCADPS</i> | miR-4789-3p       | 1 |
| <i>circCADPS</i> | miR-4793-3p       | 3 |
| <i>circCADPS</i> | miR-4795-5p       | 2 |
| <i>circCADPS</i> | miR-4796-3p       | 2 |
| <i>circCADPS</i> | miR-4799-5p       | 1 |
| <i>circCADPS</i> | miR-4800-5p       | 1 |
| <i>circCADPS</i> | miR-484/3155      | 1 |
| <i>circCADPS</i> | miR-485-5p        | 1 |
| <i>circCADPS</i> | miR-486-5p        | 1 |
| <i>circCADPS</i> | miR-488-3p        | 1 |
| <i>circCADPS</i> | miR-488-5p        | 1 |
| <i>circCADPS</i> | miR-489-3p        | 5 |
| <i>circCADPS</i> | miR-490-5p        | 6 |
| <i>circCADPS</i> | miR-492           | 3 |
| <i>circCADPS</i> | miR-495-3p        | 3 |
| <i>circCADPS</i> | miR-495-5p        | 5 |
| <i>circCADPS</i> | miR-497-3p        | 1 |
| <i>circCADPS</i> | miR-4999-5p       | 1 |
| <i>circCADPS</i> | miR-499b-5p       | 1 |
| <i>circCADPS</i> | miR-5003-3p       | 2 |
| <i>circCADPS</i> | miR-5006-5p       | 1 |
| <i>circCADPS</i> | miR-5008-5p       | 1 |
| <i>circCADPS</i> | miR-500a-3p       | 3 |
| <i>circCADPS</i> | miR-501-3p/502-3p | 3 |
| <i>circCADPS</i> | miR-5010-3p       | 1 |
| <i>circCADPS</i> | miR-5011-5p       | 2 |
| <i>circCADPS</i> | miR-504-5p.1      | 1 |
| <i>circCADPS</i> | miR-505-3p.1      | 1 |
| <i>circCADPS</i> | miR-505-3p.2      | 6 |
| <i>circCADPS</i> | miR-507/557       | 3 |
| <i>circCADPS</i> | miR-5088-3p       | 2 |
| <i>circCADPS</i> | miR-5089-3p       | 1 |
| <i>circCADPS</i> | miR-5091          | 1 |
| <i>circCADPS</i> | miR-5093          | 5 |

|                  |                                                                  |   |
|------------------|------------------------------------------------------------------|---|
| <i>circCADPS</i> | miR-5096                                                         | 1 |
| <i>circCADPS</i> | miR-510-3p                                                       | 1 |
| <i>circCADPS</i> | miR-5100                                                         | 1 |
| <i>circCADPS</i> | miR-511-5p                                                       | 1 |
| <i>circCADPS</i> | miR-512-3p                                                       | 1 |
| <i>circCADPS</i> | miR-512-5p                                                       | 1 |
| <i>circCADPS</i> | miR-513b-3p                                                      | 1 |
| <i>circCADPS</i> | miR-513b-5p                                                      | 1 |
| <i>circCADPS</i> | miR-516a-3p/516b-3p/7162-5p                                      | 1 |
| <i>circCADPS</i> | miR-516a-5p                                                      | 1 |
| <i>circCADPS</i> | miR-516b-5p                                                      | 1 |
| <i>circCADPS</i> | miR-517-5p                                                       | 2 |
| <i>circCADPS</i> | miR-5187-3p                                                      | 1 |
| <i>circCADPS</i> | miR-518a-5p/527                                                  | 5 |
| <i>circCADPS</i> | miR-519-3p                                                       | 1 |
| <i>circCADPS</i> | miR-5192                                                         | 1 |
| <i>circCADPS</i> | miR-5197-3p                                                      | 5 |
| <i>circCADPS</i> | miR-520f-5p                                                      | 2 |
| <i>circCADPS</i> | miR-520g-3p                                                      | 3 |
| <i>circCADPS</i> | miR-522-3p                                                       | 3 |
| <i>circCADPS</i> | miR-525-5p                                                       | 1 |
| <i>circCADPS</i> | miR-532-3p                                                       | 1 |
| <i>circCADPS</i> | miR-532-5p                                                       | 2 |
| <i>circCADPS</i> | miR-542-3p                                                       | 5 |
| <i>circCADPS</i> | miR-543                                                          | 1 |
| <i>circCADPS</i> | miR-544a                                                         | 1 |
| <i>circCADPS</i> | miR-545-3p                                                       | 6 |
| <i>circCADPS</i> | miR-545-5p                                                       | 1 |
| <i>circCADPS</i> | miR-548ac/548bb-3p/548d-3p/548h-3p/548z                          | 1 |
| <i>circCADPS</i> | miR-548ah-5p/3609                                                | 1 |
| <i>circCADPS</i> | miR-548ai/548ag/548ba/570-5p                                     | 1 |
| <i>circCADPS</i> | miR-548aj-5p/548f-5p/548g-5p/548x-5p                             | 4 |
| <i>circCADPS</i> | miR-548ap-3p/548aa/548t-3p                                       | 3 |
| <i>circCADPS</i> | miR-548aq-3p/548am-3p/548aj-3p/548ah-3p/548ae-3p/548j-3p/548x-3p | 3 |
| <i>circCADPS</i> | miR-548as-3p                                                     | 3 |
| <i>circCADPS</i> | miR-548av-3p                                                     | 2 |
| <i>circCADPS</i> | miR-548av-5p/548k/8054                                           | 2 |
| <i>circCADPS</i> | miR-548aw                                                        | 5 |

|                  |                                                                    |   |
|------------------|--------------------------------------------------------------------|---|
| <i>circCADPS</i> | miR-548ay-3p/548at-3p                                              | 3 |
| <i>circCADPS</i> | miR-548ay-5p/548au-5p/548as-5p/548ar-3p/548aq-5p/548ap-5p/548am-5p | 2 |
| <i>circCADPS</i> | miR-548az-3p/548ar-3p/548a-3p/548e-3p/548f-3p                      | 1 |
| <i>circCADPS</i> | miR-548az-5p/548t-5p                                               | 1 |
| <i>circCADPS</i> | miR-548b-3p                                                        | 2 |
| <i>circCADPS</i> | miR-548c-3p                                                        | 4 |
| <i>circCADPS</i> | miR-548g-3p                                                        | 5 |
| <i>circCADPS</i> | miR-548l                                                           | 2 |
| <i>circCADPS</i> | miR-548m                                                           | 1 |
| <i>circCADPS</i> | miR-548n                                                           | 1 |
| <i>circCADPS</i> | miR-548q                                                           | 1 |
| <i>circCADPS</i> | miR-548s                                                           | 1 |
| <i>circCADPS</i> | miR-552-3p                                                         | 1 |
| <i>circCADPS</i> | miR-552-5p                                                         | 1 |
| <i>circCADPS</i> | miR-553                                                            | 1 |
| <i>circCADPS</i> | miR-554                                                            | 1 |
| <i>circCADPS</i> | miR-5572                                                           | 1 |
| <i>circCADPS</i> | miR-5580-5p                                                        | 1 |
| <i>circCADPS</i> | miR-5582-3p                                                        | 4 |
| <i>circCADPS</i> | miR-5582-5p                                                        | 2 |
| <i>circCADPS</i> | miR-5583-3p                                                        | 4 |
| <i>circCADPS</i> | miR-5584-3p                                                        | 1 |
| <i>circCADPS</i> | miR-5584-5p                                                        | 1 |
| <i>circCADPS</i> | miR-5586-5p                                                        | 1 |
| <i>circCADPS</i> | miR-5588-3p                                                        | 3 |
| <i>circCADPS</i> | miR-5590-5p                                                        | 1 |
| <i>circCADPS</i> | miR-5591-3p                                                        | 6 |
| <i>circCADPS</i> | miR-562                                                            | 1 |
| <i>circCADPS</i> | miR-568                                                            | 1 |
| <i>circCADPS</i> | miR-5680                                                           | 3 |
| <i>circCADPS</i> | miR-5683                                                           | 5 |
| <i>circCADPS</i> | miR-5684                                                           | 1 |
| <i>circCADPS</i> | miR-5687                                                           | 1 |
| <i>circCADPS</i> | miR-5691                                                           | 1 |
| <i>circCADPS</i> | miR-5692a                                                          | 2 |
| <i>circCADPS</i> | miR-5694                                                           | 1 |
| <i>circCADPS</i> | miR-5696                                                           | 2 |
| <i>circCADPS</i> | miR-5697                                                           | 1 |

|                  |                 |   |
|------------------|-----------------|---|
| <i>circCADPS</i> | miR-570-3p      | 1 |
| <i>circCADPS</i> | miR-5702        | 1 |
| <i>circCADPS</i> | miR-571         | 1 |
| <i>circCADPS</i> | miR-573/3616-5p | 9 |
| <i>circCADPS</i> | miR-5739        | 1 |
| <i>circCADPS</i> | miR-574-5p      | 1 |
| <i>circCADPS</i> | miR-575/4676-5p | 1 |
| <i>circCADPS</i> | miR-576-5p      | 1 |
| <i>circCADPS</i> | miR-578         | 2 |
| <i>circCADPS</i> | miR-579-3p      | 2 |
| <i>circCADPS</i> | miR-580-3p      | 2 |
| <i>circCADPS</i> | miR-580-5p      | 2 |
| <i>circCADPS</i> | miR-581         | 3 |
| <i>circCADPS</i> | miR-584-5p      | 3 |
| <i>circCADPS</i> | miR-587         | 2 |
| <i>circCADPS</i> | miR-588         | 1 |
| <i>circCADPS</i> | miR-589-5p      | 1 |
| <i>circCADPS</i> | miR-590-3p      | 1 |
| <i>circCADPS</i> | miR-592         | 3 |
| <i>circCADPS</i> | miR-593-5p      | 4 |
| <i>circCADPS</i> | miR-595         | 2 |
| <i>circCADPS</i> | miR-597-3p      | 2 |
| <i>circCADPS</i> | miR-597-5p      | 3 |
| <i>circCADPS</i> | miR-599         | 3 |
| <i>circCADPS</i> | miR-603         | 1 |
| <i>circCADPS</i> | miR-604         | 4 |
| <i>circCADPS</i> | miR-605-3p      | 1 |
| <i>circCADPS</i> | miR-607         | 2 |
| <i>circCADPS</i> | miR-6071        | 1 |
| <i>circCADPS</i> | miR-6073        | 1 |
| <i>circCADPS</i> | miR-6079        | 2 |
| <i>circCADPS</i> | miR-608/4651    | 1 |
| <i>circCADPS</i> | miR-6089        | 1 |
| <i>circCADPS</i> | miR-6124        | 1 |
| <i>circCADPS</i> | miR-6126        | 1 |
| <i>circCADPS</i> | miR-6128        | 4 |
| <i>circCADPS</i> | miR-6131        | 1 |
| <i>circCADPS</i> | miR-615-5p      | 1 |

|                  |                    |   |
|------------------|--------------------|---|
| <i>circCADPS</i> | miR-616-3p         | 2 |
| <i>circCADPS</i> | miR-6165           | 1 |
| <i>circCADPS</i> | miR-619-3p         | 3 |
| <i>circCADPS</i> | miR-619-5p/6506-5p | 1 |
| <i>circCADPS</i> | miR-624-5p         | 2 |
| <i>circCADPS</i> | miR-626/6876-3p    | 1 |
| <i>circCADPS</i> | miR-627-3p         | 1 |
| <i>circCADPS</i> | miR-628-5p         | 1 |
| <i>circCADPS</i> | miR-629-5p         | 1 |
| <i>circCADPS</i> | miR-631/3661       | 2 |
| <i>circCADPS</i> | miR-634            | 1 |
| <i>circCADPS</i> | miR-642a-5p        | 3 |
| <i>circCADPS</i> | miR-645            | 2 |
| <i>circCADPS</i> | miR-647            | 9 |
| <i>circCADPS</i> | miR-6499-3p        | 1 |
| <i>circCADPS</i> | miR-6500-3p        | 1 |
| <i>circCADPS</i> | miR-6503-3p        | 1 |
| <i>circCADPS</i> | miR-6507-3p        | 2 |
| <i>circCADPS</i> | miR-6507-5p        | 1 |
| <i>circCADPS</i> | miR-6508-3p        | 3 |
| <i>circCADPS</i> | miR-651-3p         | 2 |
| <i>circCADPS</i> | miR-6510-5p        | 1 |
| <i>circCADPS</i> | miR-6512-5p        | 2 |
| <i>circCADPS</i> | miR-6513-3p        | 5 |
| <i>circCADPS</i> | miR-6515-3p        | 1 |
| <i>circCADPS</i> | miR-6516-3p        | 1 |
| <i>circCADPS</i> | miR-6516-5p        | 3 |
| <i>circCADPS</i> | miR-653-5p         | 1 |
| <i>circCADPS</i> | miR-656-5p         | 2 |
| <i>circCADPS</i> | miR-657            | 1 |
| <i>circCADPS</i> | miR-658            | 2 |
| <i>circCADPS</i> | miR-659-3p         | 2 |
| <i>circCADPS</i> | miR-659-5p         | 3 |
| <i>circCADPS</i> | miR-660-5p         | 1 |
| <i>circCADPS</i> | miR-663b           | 1 |
| <i>circCADPS</i> | miR-664a-5p/4794   | 1 |
| <i>circCADPS</i> | miR-665            | 1 |
| <i>circCADPS</i> | miR-668-3p         | 1 |

|                  |                             |   |
|------------------|-----------------------------|---|
| <i>circCADPS</i> | miR-670-5p                  | 1 |
| <i>circCADPS</i> | miR-6715a-3p                | 1 |
| <i>circCADPS</i> | miR-6715b-3p                | 1 |
| <i>circCADPS</i> | miR-6724-5p/6773-5p         | 3 |
| <i>circCADPS</i> | miR-6729-3p                 | 4 |
| <i>circCADPS</i> | miR-6734-3p                 | 3 |
| <i>circCADPS</i> | miR-6735-3p                 | 2 |
| <i>circCADPS</i> | miR-6737-5p/6812-5p/6819-5p | 1 |
| <i>circCADPS</i> | miR-6738-3p                 | 1 |
| <i>circCADPS</i> | miR-6740-5p                 | 2 |
| <i>circCADPS</i> | miR-6744-5p                 | 1 |
| <i>circCADPS</i> | miR-6747-3p                 | 1 |
| <i>circCADPS</i> | miR-6747-5p                 | 1 |
| <i>circCADPS</i> | miR-6750-5p/6822-5p         | 1 |
| <i>circCADPS</i> | miR-6752-3p                 | 1 |
| <i>circCADPS</i> | miR-6753-5p                 | 3 |
| <i>circCADPS</i> | miR-6755-3p                 | 1 |
| <i>circCADPS</i> | miR-6755-5p                 | 1 |
| <i>circCADPS</i> | miR-6756-5p/6766-5p         | 1 |
| <i>circCADPS</i> | miR-6758-5p/6856-5p         | 2 |
| <i>circCADPS</i> | miR-6759-3p                 | 3 |
| <i>circCADPS</i> | miR-6759-5p                 | 1 |
| <i>circCADPS</i> | miR-676-5p                  | 1 |
| <i>circCADPS</i> | miR-6761-5p                 | 2 |
| <i>circCADPS</i> | miR-6762-3p                 | 4 |
| <i>circCADPS</i> | miR-6765-3p                 | 4 |
| <i>circCADPS</i> | miR-6765-5p                 | 1 |
| <i>circCADPS</i> | miR-6768-5p                 | 1 |
| <i>circCADPS</i> | miR-6770-5p                 | 1 |
| <i>circCADPS</i> | miR-6771-3p                 | 1 |
| <i>circCADPS</i> | miR-6771-5p                 | 2 |
| <i>circCADPS</i> | miR-6773-3p                 | 2 |
| <i>circCADPS</i> | miR-6783-5p                 | 1 |
| <i>circCADPS</i> | miR-6786-3p                 | 2 |
| <i>circCADPS</i> | miR-6796-3p                 | 3 |
| <i>circCADPS</i> | miR-6796-5p                 | 1 |
| <i>circCADPS</i> | miR-6800-5p                 | 1 |
| <i>circCADPS</i> | miR-6801-5p                 | 2 |

|                  |                     |   |
|------------------|---------------------|---|
| <i>circCADPS</i> | miR-6802-3p         | 1 |
| <i>circCADPS</i> | miR-6802-5p         | 1 |
| <i>circCADPS</i> | miR-6804-3p         | 5 |
| <i>circCADPS</i> | miR-6809-3p         | 1 |
| <i>circCADPS</i> | miR-6809-5p         | 4 |
| <i>circCADPS</i> | miR-6814-5p         | 1 |
| <i>circCADPS</i> | miR-6815-3p         | 1 |
| <i>circCADPS</i> | miR-6815-5p/6865-5p | 1 |
| <i>circCADPS</i> | miR-6817-3p         | 2 |
| <i>circCADPS</i> | miR-6818-3p         | 1 |
| <i>circCADPS</i> | miR-6827-5p         | 1 |
| <i>circCADPS</i> | miR-6828-3p         | 1 |
| <i>circCADPS</i> | miR-6830-3p         | 1 |
| <i>circCADPS</i> | miR-6831-3p         | 1 |
| <i>circCADPS</i> | miR-6833-5p         | 3 |
| <i>circCADPS</i> | miR-6837-3p         | 1 |
| <i>circCADPS</i> | miR-6841-5p         | 1 |
| <i>circCADPS</i> | miR-6842-3p         | 9 |
| <i>circCADPS</i> | miR-6844            | 1 |
| <i>circCADPS</i> | miR-6849-3p         | 1 |
| <i>circCADPS</i> | miR-6850-5p         | 2 |
| <i>circCADPS</i> | miR-6854-5p         | 3 |
| <i>circCADPS</i> | miR-6858-3p         | 1 |
| <i>circCADPS</i> | miR-6861-3p         | 3 |
| <i>circCADPS</i> | miR-6864-5p         | 1 |
| <i>circCADPS</i> | miR-6865-3p         | 2 |
| <i>circCADPS</i> | miR-6868-3p         | 1 |
| <i>circCADPS</i> | miR-6868-5p         | 1 |
| <i>circCADPS</i> | miR-6869-5p         | 1 |
| <i>circCADPS</i> | miR-6871-3p         | 3 |
| <i>circCADPS</i> | miR-6873-3p         | 2 |
| <i>circCADPS</i> | miR-6875-3p         | 1 |
| <i>circCADPS</i> | miR-6878-3p         | 2 |
| <i>circCADPS</i> | miR-6882-3p         | 1 |
| <i>circCADPS</i> | miR-6884-3p         | 2 |
| <i>circCADPS</i> | miR-6885-3p         | 1 |
| <i>circCADPS</i> | miR-6886-3p         | 2 |
| <i>circCADPS</i> | miR-6886-5p         | 1 |

|                  |             |   |
|------------------|-------------|---|
| <i>circCADPS</i> | miR-6888-3p | 2 |
| <i>circCADPS</i> | miR-6892-3p | 3 |
| <i>circCADPS</i> | miR-7109-3p | 1 |
| <i>circCADPS</i> | miR-7110-3p | 2 |
| <i>circCADPS</i> | miR-7112-3p | 2 |
| <i>circCADPS</i> | miR-7114-5p | 1 |
| <i>circCADPS</i> | miR-7152-5p | 1 |
| <i>circCADPS</i> | miR-7153-3p | 3 |
| <i>circCADPS</i> | miR-7156-3p | 3 |
| <i>circCADPS</i> | miR-7158-3p | 1 |
| <i>circCADPS</i> | miR-7158-5p | 3 |
| <i>circCADPS</i> | miR-7159-5p | 6 |
| <i>circCADPS</i> | miR-7160-5p | 1 |
| <i>circCADPS</i> | miR-7161-3p | 5 |
| <i>circCADPS</i> | miR-7515    | 3 |
| <i>circCADPS</i> | miR-758-5p  | 3 |
| <i>circCADPS</i> | miR-767-3p  | 1 |
| <i>circCADPS</i> | miR-767-5p  | 3 |
| <i>circCADPS</i> | miR-770-5p  | 3 |
| <i>circCADPS</i> | miR-7703    | 2 |
| <i>circCADPS</i> | miR-7704    | 1 |
| <i>circCADPS</i> | miR-7844-5p | 1 |
| <i>circCADPS</i> | miR-7845-5p | 1 |
| <i>circCADPS</i> | miR-7848-3p | 1 |
| <i>circCADPS</i> | miR-7850-5p | 4 |
| <i>circCADPS</i> | miR-7851-3p | 3 |
| <i>circCADPS</i> | miR-7852-3p | 1 |
| <i>circCADPS</i> | miR-7856-5p | 3 |
| <i>circCADPS</i> | miR-7974    | 2 |
| <i>circCADPS</i> | miR-7978    | 1 |
| <i>circCADPS</i> | miR-802     | 1 |
| <i>circCADPS</i> | miR-8056    | 2 |
| <i>circCADPS</i> | miR-8062    | 1 |
| <i>circCADPS</i> | miR-8063    | 2 |
| <i>circCADPS</i> | miR-8064    | 1 |
| <i>circCADPS</i> | miR-8066    | 5 |
| <i>circCADPS</i> | miR-8068    | 2 |
| <i>circCADPS</i> | miR-8075    | 1 |



|                   |                         |   |
|-------------------|-------------------------|---|
| <i>circCADPS</i>  | miR-8077                | 1 |
| <i>circCADPS</i>  | miR-8081                | 1 |
| <i>circCADPS</i>  | miR-8086                | 1 |
| <i>circCADPS</i>  | miR-8485                | 1 |
| <i>circCADPS</i>  | miR-874-3p              | 1 |
| <i>circCADPS</i>  | miR-875-3p              | 5 |
| <i>circCADPS</i>  | miR-885-3p              | 1 |
| <i>circCADPS</i>  | miR-888-3p              | 1 |
| <i>circCADPS</i>  | miR-889-3p              | 2 |
| <i>circCADPS</i>  | miR-889-5p              | 3 |
| <i>circCADPS</i>  | miR-890                 | 2 |
| <i>circCADPS</i>  | miR-922                 | 1 |
| <i>circCADPS</i>  | miR-934                 | 1 |
| <i>circCADPS</i>  | miR-935                 | 2 |
| <i>circCADPS</i>  | miR-938                 | 2 |
| <i>circCADPS</i>  | miR-940/6808-5p/6893-5p | 1 |
| <i>circCADPS</i>  | miR-942-5p              | 1 |
| <i>circCADPS</i>  | miR-944                 | 1 |
| <i>circCADPS</i>  | miR-95-3p               | 1 |
| <i>circCADPS</i>  | miR-9500                | 1 |
| <i>circCADPS</i>  | miR-96-3p               | 1 |
| <i>circCADPS</i>  | miR-99-3p               | 3 |
| <i>circCADPS</i>  | miR-10b-3p              | 1 |
| <i>circCADPS</i>  | miR-4320                | 1 |
| <i>circCCDC66</i> | miR-1178-3p             | 2 |
| <i>circCCDC66</i> | miR-1183                | 1 |
| <i>circCCDC66</i> | miR-1200                | 4 |
| <i>circCCDC66</i> | miR-1206                | 4 |
| <i>circCCDC66</i> | miR-1207-3p             | 8 |
| <i>circCCDC66</i> | miR-1208                | 2 |
| <i>circCCDC66</i> | miR-1238-3p             | 3 |
| <i>circCCDC66</i> | miR-124-5p              | 2 |
| <i>circCCDC66</i> | miR-1245b-3p            | 5 |
| <i>circCCDC66</i> | miR-1266-3p             | 1 |
| <i>circCCDC66</i> | miR-1273g-3p            | 3 |
| <i>circCCDC66</i> | miR-1277-5p             | 6 |
| <i>circCCDC66</i> | miR-1278                | 3 |
| <i>circCCDC66</i> | miR-1279                | 1 |

|                   |                     |    |
|-------------------|---------------------|----|
| <i>circCCDC66</i> | miR-129-5p          | 10 |
| <i>circCCDC66</i> | miR-1298-5p         | 3  |
| <i>circCCDC66</i> | miR-1301-5p/6502-5p | 1  |
| <i>circCCDC66</i> | miR-1302/4298       | 5  |
| <i>circCCDC66</i> | miR-130b-5p         | 3  |
| <i>circCCDC66</i> | miR-1323            | 1  |
| <i>circCCDC66</i> | miR-133a-5p         | 3  |
| <i>circCCDC66</i> | miR-136-5p          | 1  |
| <i>circCCDC66</i> | miR-138-2-3p        | 3  |
| <i>circCCDC66</i> | miR-138-5p          | 3  |
| <i>circCCDC66</i> | miR-140-3p.2        | 2  |
| <i>circCCDC66</i> | miR-142-5p          | 5  |
| <i>circCCDC66</i> | miR-1468-3p         | 1  |
| <i>circCCDC66</i> | miR-151-3p          | 3  |
| <i>circCCDC66</i> | miR-153-5p          | 4  |
| <i>circCCDC66</i> | miR-154-3p/487-3p   | 1  |
| <i>circCCDC66</i> | miR-1587/3620-5p    | 3  |
| <i>circCCDC66</i> | miR-16-2-3p/195-3p  | 1  |
| <i>circCCDC66</i> | miR-181-5p          | 3  |
| <i>circCCDC66</i> | miR-183-5p.1        | 2  |
| <i>circCCDC66</i> | miR-185-3p          | 3  |
| <i>circCCDC66</i> | miR-1911-5p         | 3  |
| <i>circCCDC66</i> | miR-192-5p/215-5p   | 2  |
| <i>circCCDC66</i> | miR-1976            | 4  |
| <i>circCCDC66</i> | miR-200-3p/429      | 4  |
| <i>circCCDC66</i> | miR-204-3p/4646-5p  | 5  |
| <i>circCCDC66</i> | miR-204-5p/211-5p   | 3  |
| <i>circCCDC66</i> | miR-205-3p          | 6  |
| <i>circCCDC66</i> | miR-208-3p          | 4  |
| <i>circCCDC66</i> | miR-208-5p          | 1  |
| <i>circCCDC66</i> | miR-2115-5p         | 3  |
| <i>circCCDC66</i> | miR-2117            | 4  |
| <i>circCCDC66</i> | miR-219b-5p         | 4  |
| <i>circCCDC66</i> | miR-23-3p           | 4  |
| <i>circCCDC66</i> | miR-27a-5p          | 3  |
| <i>circCCDC66</i> | miR-29b-2-5p        | 3  |
| <i>circCCDC66</i> | miR-30-3p           | 10 |
| <i>circCCDC66</i> | miR-3074-3p         | 3  |

|                   |                     |   |
|-------------------|---------------------|---|
| <i>circCCDC66</i> | miR-3119            | 3 |
| <i>circCCDC66</i> | miR-3121-3p         | 1 |
| <i>circCCDC66</i> | miR-3121-5p         | 4 |
| <i>circCCDC66</i> | miR-3124-3p         | 6 |
| <i>circCCDC66</i> | miR-3136-5p/4439    | 2 |
| <i>circCCDC66</i> | miR-3140-3p         | 4 |
| <i>circCCDC66</i> | miR-3145-5p         | 1 |
| <i>circCCDC66</i> | miR-3148            | 1 |
| <i>circCCDC66</i> | miR-3192-5p         | 5 |
| <i>circCCDC66</i> | miR-32-3p           | 2 |
| <i>circCCDC66</i> | miR-330-3p.2        | 1 |
| <i>circCCDC66</i> | miR-335-3p          | 5 |
| <i>circCCDC66</i> | miR-338-5p          | 1 |
| <i>circCCDC66</i> | miR-33a-3p          | 4 |
| <i>circCCDC66</i> | miR-342-3p          | 2 |
| <i>circCCDC66</i> | miR-34a-3p          | 3 |
| <i>circCCDC66</i> | miR-361-3p          | 3 |
| <i>circCCDC66</i> | miR-361-5p          | 3 |
| <i>circCCDC66</i> | miR-3617-3p         | 3 |
| <i>circCCDC66</i> | miR-362-5p/500b-5p  | 4 |
| <i>circCCDC66</i> | miR-3620-3p         | 2 |
| <i>circCCDC66</i> | miR-3653-5p         | 4 |
| <i>circCCDC66</i> | miR-3658            | 4 |
| <i>circCCDC66</i> | miR-3679-3p         | 3 |
| <i>circCCDC66</i> | miR-377-3p          | 2 |
| <i>circCCDC66</i> | miR-378a-5p         | 4 |
| <i>circCCDC66</i> | miR-378g            | 3 |
| <i>circCCDC66</i> | miR-3920            | 4 |
| <i>circCCDC66</i> | miR-3938            | 3 |
| <i>circCCDC66</i> | miR-3941            | 1 |
| <i>circCCDC66</i> | miR-3942-3p         | 1 |
| <i>circCCDC66</i> | miR-3977            | 3 |
| <i>circCCDC66</i> | miR-4273/7156-5p    | 4 |
| <i>circCCDC66</i> | miR-4279            | 5 |
| <i>circCCDC66</i> | miR-4328            | 5 |
| <i>circCCDC66</i> | miR-4422            | 1 |
| <i>circCCDC66</i> | miR-4426/4647/4662b | 1 |
| <i>circCCDC66</i> | miR-4427            | 3 |

|                   |                     |   |
|-------------------|---------------------|---|
| <i>circCCDC66</i> | miR-4436b-5p        | 3 |
| <i>circCCDC66</i> | miR-4446-5p         | 3 |
| <i>circCCDC66</i> | miR-4477a           | 1 |
| <i>circCCDC66</i> | miR-4482-3p         | 3 |
| <i>circCCDC66</i> | miR-4486            | 3 |
| <i>circCCDC66</i> | miR-4496            | 1 |
| <i>circCCDC66</i> | miR-4502            | 4 |
| <i>circCCDC66</i> | miR-4517            | 1 |
| <i>circCCDC66</i> | miR-452-5p/892-3p   | 8 |
| <i>circCCDC66</i> | miR-4521            | 1 |
| <i>circCCDC66</i> | miR-4524b-3p        | 4 |
| <i>circCCDC66</i> | miR-4662a-3p        | 1 |
| <i>circCCDC66</i> | miR-4672            | 1 |
| <i>circCCDC66</i> | miR-4674            | 3 |
| <i>circCCDC66</i> | miR-4677-5p         | 4 |
| <i>circCCDC66</i> | miR-4680-3p         | 3 |
| <i>circCCDC66</i> | miR-4684-5p         | 2 |
| <i>circCCDC66</i> | miR-4691-5p/6792-3p | 3 |
| <i>circCCDC66</i> | miR-4693-5p         | 4 |
| <i>circCCDC66</i> | miR-4699-5p         | 2 |
| <i>circCCDC66</i> | miR-4709-3p         | 2 |
| <i>circCCDC66</i> | miR-4717-3p         | 1 |
| <i>circCCDC66</i> | miR-4719            | 1 |
| <i>circCCDC66</i> | miR-4724-5p         | 3 |
| <i>circCCDC66</i> | miR-4729            | 4 |
| <i>circCCDC66</i> | miR-4731-3p/4801    | 3 |
| <i>circCCDC66</i> | miR-4731-5p         | 5 |
| <i>circCCDC66</i> | miR-4733-5p         | 4 |
| <i>circCCDC66</i> | miR-4738-3p         | 1 |
| <i>circCCDC66</i> | miR-4742-3p         | 1 |
| <i>circCCDC66</i> | miR-4755-5p/5006-3p | 3 |
| <i>circCCDC66</i> | miR-4760-5p/8061    | 4 |
| <i>circCCDC66</i> | miR-4762-3p         | 1 |
| <i>circCCDC66</i> | miR-4768-5p/6833-3p | 2 |
| <i>circCCDC66</i> | miR-4778-5p         | 1 |
| <i>circCCDC66</i> | miR-4793-5p         | 4 |
| <i>circCCDC66</i> | miR-499a-5p         | 4 |
| <i>circCCDC66</i> | miR-5003-5p         | 1 |

|                   |                                      |    |
|-------------------|--------------------------------------|----|
| <i>circCCDC66</i> | miR-501-5p                           | 4  |
| <i>circCCDC66</i> | miR-5011-5p                          | 3  |
| <i>circCCDC66</i> | miR-506-5p                           | 1  |
| <i>circCCDC66</i> | miR-508-5p                           | 1  |
| <i>circCCDC66</i> | miR-5096                             | 2  |
| <i>circCCDC66</i> | miR-514a-3p                          | 1  |
| <i>circCCDC66</i> | miR-516a-3p/516b-3p/7162-5p          | 3  |
| <i>circCCDC66</i> | miR-5187-3p                          | 3  |
| <i>circCCDC66</i> | miR-5196-3p                          | 4  |
| <i>circCCDC66</i> | miR-520f-5p                          | 2  |
| <i>circCCDC66</i> | miR-539-3p                           | 1  |
| <i>circCCDC66</i> | miR-548ai/548ag/548ba/570-5p         | 1  |
| <i>circCCDC66</i> | miR-548aj-5p/548f-5p/548g-5p/548x-5p | 1  |
| <i>circCCDC66</i> | miR-548ap-3p/548aa/548t-3p           | 1  |
| <i>circCCDC66</i> | miR-548as-3p                         | 1  |
| <i>circCCDC66</i> | miR-548av-3p                         | 1  |
| <i>circCCDC66</i> | miR-548ay-3p/548at-3p                | 1  |
| <i>circCCDC66</i> | miR-548e-5p                          | 1  |
| <i>circCCDC66</i> | miR-548p                             | 1  |
| <i>circCCDC66</i> | miR-5571-3p                          | 1  |
| <i>circCCDC66</i> | miR-5583-3p                          | 1  |
| <i>circCCDC66</i> | miR-5585-3p                          | 7  |
| <i>circCCDC66</i> | miR-5589-5p                          | 5  |
| <i>circCCDC66</i> | miR-5680                             | 4  |
| <i>circCCDC66</i> | miR-5683                             | 10 |
| <i>circCCDC66</i> | miR-5696                             | 4  |
| <i>circCCDC66</i> | miR-5697                             | 1  |
| <i>circCCDC66</i> | miR-576-3p                           | 4  |
| <i>circCCDC66</i> | miR-577                              | 1  |
| <i>circCCDC66</i> | miR-579-3p                           | 4  |
| <i>circCCDC66</i> | miR-582-3p                           | 1  |
| <i>circCCDC66</i> | miR-587                              | 3  |
| <i>circCCDC66</i> | miR-590-3p                           | 2  |
| <i>circCCDC66</i> | miR-6074                             | 1  |
| <i>circCCDC66</i> | miR-612/1285-3p/3187-5p/5189-5p/6860 | 3  |
| <i>circCCDC66</i> | miR-6124                             | 1  |
| <i>circCCDC66</i> | miR-6131                             | 3  |
| <i>circCCDC66</i> | miR-619-5p/6506-5p                   | 5  |

|                   |                 |   |
|-------------------|-----------------|---|
| <i>circCCDC66</i> | miR-623         | 3 |
| <i>circCCDC66</i> | miR-625-3p      | 3 |
| <i>circCCDC66</i> | miR-629-3p      | 1 |
| <i>circCCDC66</i> | miR-630         | 1 |
| <i>circCCDC66</i> | miR-631/3661    | 1 |
| <i>circCCDC66</i> | miR-641/3617-5p | 4 |
| <i>circCCDC66</i> | miR-647         | 4 |
| <i>circCCDC66</i> | miR-6509-3p     | 3 |
| <i>circCCDC66</i> | miR-651-3p      | 1 |
| <i>circCCDC66</i> | miR-6512-5p     | 5 |
| <i>circCCDC66</i> | miR-653-5p      | 5 |
| <i>circCCDC66</i> | miR-654-3p      | 4 |
| <i>circCCDC66</i> | miR-656-3p      | 1 |
| <i>circCCDC66</i> | miR-664a-3p     | 3 |
| <i>circCCDC66</i> | miR-670-3p      | 3 |
| <i>circCCDC66</i> | miR-6749-3p     | 3 |
| <i>circCCDC66</i> | miR-6757-3p     | 2 |
| <i>circCCDC66</i> | miR-6760-3p     | 2 |
| <i>circCCDC66</i> | miR-6809-3p     | 2 |
| <i>circCCDC66</i> | miR-6817-3p     | 1 |
| <i>circCCDC66</i> | miR-6818-3p     | 4 |
| <i>circCCDC66</i> | miR-6832-3p     | 3 |
| <i>circCCDC66</i> | miR-6842-3p     | 4 |
| <i>circCCDC66</i> | miR-6853-3p     | 4 |
| <i>circCCDC66</i> | miR-6870-3p     | 4 |
| <i>circCCDC66</i> | miR-6873-3p     | 1 |
| <i>circCCDC66</i> | miR-6885-3p     | 5 |
| <i>circCCDC66</i> | miR-7110-3p     | 1 |
| <i>circCCDC66</i> | miR-7159-3p     | 3 |
| <i>circCCDC66</i> | miR-759         | 4 |
| <i>circCCDC66</i> | miR-7705        | 1 |
| <i>circCCDC66</i> | miR-7856-5p     | 4 |
| <i>circCCDC66</i> | miR-7975        | 1 |
| <i>circCCDC66</i> | miR-8074        | 2 |
| <i>circCCDC66</i> | miR-8075        | 4 |
| <i>circCCDC66</i> | miR-8076        | 1 |
| <i>circCCDC66</i> | miR-8084        | 4 |
| <i>circCCDC66</i> | miR-888-3p      | 1 |

|                   |                                     |   |
|-------------------|-------------------------------------|---|
| <i>circCCDC66</i> | miR-892-5p                          | 1 |
| <i>circCCDC66</i> | miR-892b                            | 1 |
| <i>circCCDC66</i> | miR-9-5p                            | 4 |
| <i>circCCDC66</i> | miR-942-5p                          | 2 |
| <i>circCCDC66</i> | miR-943                             | 2 |
| <i>circCCDC66</i> | miR-4661-5p                         | 1 |
| <i>circCCDC66</i> | let-7a-2-3p/let-7g-3p               | 1 |
| <i>circCCDC66</i> | let-7c-3p                           | 1 |
| <i>circCCDC66</i> | miR-1180-3p                         | 1 |
| <i>circCCDC66</i> | miR-1199-5p/6751-3p                 | 1 |
| <i>circCCDC66</i> | miR-1236-3p                         | 2 |
| <i>circCCDC66</i> | miR-1238-5p/4758-5p                 | 1 |
| <i>circCCDC66</i> | miR-1250-3p                         | 2 |
| <i>circCCDC66</i> | miR-1266-5p/4518                    | 1 |
| <i>circCCDC66</i> | miR-130-3p/301-3p/454-3p            | 1 |
| <i>circCCDC66</i> | miR-135b-3p                         | 1 |
| <i>circCCDC66</i> | miR-141-3p/200-3p                   | 1 |
| <i>circCCDC66</i> | miR-143-5p                          | 2 |
| <i>circCCDC66</i> | miR-146-5p                          | 2 |
| <i>circCCDC66</i> | miR-147a                            | 1 |
| <i>circCCDC66</i> | miR-148b-5p/6874-3p                 | 2 |
| <i>circCCDC66</i> | miR-149-5p                          | 1 |
| <i>circCCDC66</i> | miR-15b-3p                          | 1 |
| <i>circCCDC66</i> | miR-17-5p/20-5p/93-5p/106-5p/519-3p | 1 |
| <i>circCCDC66</i> | miR-185-5p                          | 1 |
| <i>circCCDC66</i> | miR-19-5p                           | 1 |
| <i>circCCDC66</i> | miR-190a-3p                         | 1 |
| <i>circCCDC66</i> | miR-191-5p                          | 1 |
| <i>circCCDC66</i> | miR-2052                            | 1 |
| <i>circCCDC66</i> | miR-2113                            | 1 |
| <i>circCCDC66</i> | miR-2116-5p                         | 2 |
| <i>circCCDC66</i> | miR-214-3p/3619-5p                  | 2 |
| <i>circCCDC66</i> | miR-22-5p                           | 2 |
| <i>circCCDC66</i> | miR-221-5p/8073                     | 1 |
| <i>circCCDC66</i> | miR-2278                            | 1 |
| <i>circCCDC66</i> | miR-27-3p                           | 2 |
| <i>circCCDC66</i> | miR-301a-5p/301b-5p                 | 1 |
| <i>circCCDC66</i> | miR-302-3p/372-3p/373-3p/520-3p     | 1 |

|                   |                           |   |
|-------------------|---------------------------|---|
| <i>circCCDC66</i> | miR-302b-5p/302d-5p       | 1 |
| <i>circCCDC66</i> | miR-3064-3p               | 2 |
| <i>circCCDC66</i> | miR-3065-3p               | 2 |
| <i>circCCDC66</i> | miR-3120-3p               | 2 |
| <i>circCCDC66</i> | miR-3120-5p               | 1 |
| <i>circCCDC66</i> | miR-3123                  | 1 |
| <i>circCCDC66</i> | miR-3157-5p               | 1 |
| <i>circCCDC66</i> | miR-3160-3p               | 1 |
| <i>circCCDC66</i> | miR-3168                  | 2 |
| <i>circCCDC66</i> | miR-3177-5p               | 1 |
| <i>circCCDC66</i> | miR-3192-3p               | 1 |
| <i>circCCDC66</i> | miR-3194-5p               | 1 |
| <i>circCCDC66</i> | miR-3200-5p               | 1 |
| <i>circCCDC66</i> | miR-323b-5p/410-5p/494-5p | 2 |
| <i>circCCDC66</i> | miR-33-5p                 | 1 |
| <i>circCCDC66</i> | miR-335-5p                | 1 |
| <i>circCCDC66</i> | miR-338-3p                | 2 |
| <i>circCCDC66</i> | miR-345-5p                | 1 |
| <i>circCCDC66</i> | miR-3613-5p               | 1 |
| <i>circCCDC66</i> | miR-3659                  | 1 |
| <i>circCCDC66</i> | miR-3660/4526             | 1 |
| <i>circCCDC66</i> | miR-3664-3p               | 1 |
| <i>circCCDC66</i> | miR-3674                  | 1 |
| <i>circCCDC66</i> | miR-3680-3p               | 2 |
| <i>circCCDC66</i> | miR-3692-5p               | 1 |
| <i>circCCDC66</i> | miR-374-5p                | 1 |
| <i>circCCDC66</i> | miR-375                   | 2 |
| <i>circCCDC66</i> | miR-376-3p                | 1 |
| <i>circCCDC66</i> | miR-383-3p                | 2 |
| <i>circCCDC66</i> | miR-3907                  | 2 |
| <i>circCCDC66</i> | miR-3913-3p               | 1 |
| <i>circCCDC66</i> | miR-3921/4653-5p          | 1 |
| <i>circCCDC66</i> | miR-3925-3p               | 2 |
| <i>circCCDC66</i> | miR-3925-5p               | 1 |
| <i>circCCDC66</i> | miR-3973                  | 1 |
| <i>circCCDC66</i> | miR-410-3p                | 1 |
| <i>circCCDC66</i> | miR-4251                  | 2 |
| <i>circCCDC66</i> | miR-4267                  | 1 |



|                   |                       |   |
|-------------------|-----------------------|---|
| <i>circCCDC66</i> | miR-4268              | 2 |
| <i>circCCDC66</i> | miR-4272              | 2 |
| <i>circCCDC66</i> | miR-4274              | 3 |
| <i>circCCDC66</i> | miR-4277              | 2 |
| <i>circCCDC66</i> | miR-4303              | 1 |
| <i>circCCDC66</i> | miR-4317              | 1 |
| <i>circCCDC66</i> | miR-4324              | 1 |
| <i>circCCDC66</i> | miR-4326              | 1 |
| <i>circCCDC66</i> | miR-4329              | 2 |
| <i>circCCDC66</i> | miR-4433a-3p          | 1 |
| <i>circCCDC66</i> | miR-4434/4516/5703    | 1 |
| <i>circCCDC66</i> | miR-4448              | 2 |
| <i>circCCDC66</i> | miR-4459              | 1 |
| <i>circCCDC66</i> | miR-4461              | 1 |
| <i>circCCDC66</i> | miR-4464/4748         | 1 |
| <i>circCCDC66</i> | miR-4468              | 1 |
| <i>circCCDC66</i> | miR-4487              | 1 |
| <i>circCCDC66</i> | miR-450b-5p           | 2 |
| <i>circCCDC66</i> | miR-4513/6855-3p      | 1 |
| <i>circCCDC66</i> | miR-4519              | 3 |
| <i>circCCDC66</i> | miR-452-3p            | 2 |
| <i>circCCDC66</i> | miR-4524a-3p          | 1 |
| <i>circCCDC66</i> | miR-4530              | 2 |
| <i>circCCDC66</i> | miR-455-3p.2          | 2 |
| <i>circCCDC66</i> | miR-4641              | 1 |
| <i>circCCDC66</i> | miR-4658/6790-5p      | 1 |
| <i>circCCDC66</i> | miR-4659a-5p/4659b-5p | 2 |
| <i>circCCDC66</i> | miR-466               | 1 |
| <i>circCCDC66</i> | miR-4663              | 1 |
| <i>circCCDC66</i> | miR-4664-3p           | 1 |
| <i>circCCDC66</i> | miR-4682              | 1 |
| <i>circCCDC66</i> | miR-4691-3p           | 1 |
| <i>circCCDC66</i> | miR-4704-3p           | 1 |
| <i>circCCDC66</i> | miR-4714-3p           | 1 |
| <i>circCCDC66</i> | miR-4735-5p           | 1 |
| <i>circCCDC66</i> | miR-4764-3p           | 1 |
| <i>circCCDC66</i> | miR-4766-5p           | 2 |
| <i>circCCDC66</i> | miR-4768-3p           | 1 |

|                   |                     |   |
|-------------------|---------------------|---|
| <i>circCCDC66</i> | miR-4773            | 1 |
| <i>circCCDC66</i> | miR-4775            | 1 |
| <i>circCCDC66</i> | miR-4776-3p         | 2 |
| <i>circCCDC66</i> | miR-488-3p          | 2 |
| <i>circCCDC66</i> | miR-489-3p          | 1 |
| <i>circCCDC66</i> | miR-490-3p          | 1 |
| <i>circCCDC66</i> | miR-493-3p          | 1 |
| <i>circCCDC66</i> | miR-493-5p          | 1 |
| <i>circCCDC66</i> | miR-499a-3p/499b-3p | 2 |
| <i>circCCDC66</i> | miR-5010-3p         | 1 |
| <i>circCCDC66</i> | miR-507/557         | 2 |
| <i>circCCDC66</i> | miR-5091            | 1 |
| <i>circCCDC66</i> | miR-512-5p          | 1 |
| <i>circCCDC66</i> | miR-513a-5p         | 2 |
| <i>circCCDC66</i> | miR-5186            | 1 |
| <i>circCCDC66</i> | miR-519-3p          | 1 |
| <i>circCCDC66</i> | miR-5192            | 1 |
| <i>circCCDC66</i> | miR-5193            | 1 |
| <i>circCCDC66</i> | miR-520g-3p         | 1 |
| <i>circCCDC66</i> | miR-524-5p          | 1 |
| <i>circCCDC66</i> | miR-539-5p          | 1 |
| <i>circCCDC66</i> | miR-544b            | 1 |
| <i>circCCDC66</i> | miR-548ah-5p/3609   | 1 |
| <i>circCCDC66</i> | miR-548ao-5p/548ax  | 1 |
| <i>circCCDC66</i> | miR-548at-5p        | 1 |
| <i>circCCDC66</i> | miR-550b-3p         | 2 |
| <i>circCCDC66</i> | miR-558             | 1 |
| <i>circCCDC66</i> | miR-5584-3p         | 2 |
| <i>circCCDC66</i> | miR-5585-5p         | 1 |
| <i>circCCDC66</i> | miR-5590-5p         | 2 |
| <i>circCCDC66</i> | miR-561-3p          | 1 |
| <i>circCCDC66</i> | miR-5681a           | 2 |
| <i>circCCDC66</i> | miR-5687            | 1 |
| <i>circCCDC66</i> | miR-5691            | 1 |
| <i>circCCDC66</i> | miR-5739            | 1 |
| <i>circCCDC66</i> | miR-574-5p          | 1 |
| <i>circCCDC66</i> | miR-575/4676-5p     | 1 |
| <i>circCCDC66</i> | miR-578             | 2 |

|                   |                     |   |
|-------------------|---------------------|---|
| <i>circCCDC66</i> | miR-580-3p          | 1 |
| <i>circCCDC66</i> | miR-589-5p          | 2 |
| <i>circCCDC66</i> | miR-592             | 1 |
| <i>circCCDC66</i> | miR-597-5p          | 1 |
| <i>circCCDC66</i> | miR-599             | 1 |
| <i>circCCDC66</i> | miR-6126            | 1 |
| <i>circCCDC66</i> | miR-618             | 3 |
| <i>circCCDC66</i> | miR-619-3p          | 1 |
| <i>circCCDC66</i> | miR-628-5p          | 1 |
| <i>circCCDC66</i> | miR-633             | 1 |
| <i>circCCDC66</i> | miR-642-3p          | 1 |
| <i>circCCDC66</i> | miR-649             | 1 |
| <i>circCCDC66</i> | miR-6515-3p         | 2 |
| <i>circCCDC66</i> | miR-6516-5p         | 2 |
| <i>circCCDC66</i> | miR-660-3p          | 1 |
| <i>circCCDC66</i> | miR-664a-5p/4794    | 1 |
| <i>circCCDC66</i> | miR-671-3p          | 1 |
| <i>circCCDC66</i> | miR-6719-3p         | 1 |
| <i>circCCDC66</i> | miR-6720-5p         | 2 |
| <i>circCCDC66</i> | miR-6730-3p         | 1 |
| <i>circCCDC66</i> | miR-6730-5p         | 2 |
| <i>circCCDC66</i> | miR-6736-3p         | 1 |
| <i>circCCDC66</i> | miR-6753-5p         | 1 |
| <i>circCCDC66</i> | miR-6758-5p/6856-5p | 1 |
| <i>circCCDC66</i> | miR-676-5p          | 2 |
| <i>circCCDC66</i> | miR-6761-5p         | 2 |
| <i>circCCDC66</i> | miR-6768-5p         | 1 |
| <i>circCCDC66</i> | miR-6772-3p         | 3 |
| <i>circCCDC66</i> | miR-6776-3p         | 2 |
| <i>circCCDC66</i> | miR-6776-5p         | 1 |
| <i>circCCDC66</i> | miR-6780a-3p        | 2 |
| <i>circCCDC66</i> | miR-6800-5p         | 1 |
| <i>circCCDC66</i> | miR-6802-5p         | 1 |
| <i>circCCDC66</i> | miR-6815-3p         | 1 |
| <i>circCCDC66</i> | miR-6818-5p         | 1 |
| <i>circCCDC66</i> | miR-6844            | 4 |
| <i>circCCDC66</i> | miR-6857-3p         | 1 |
| <i>circCCDC66</i> | miR-6858-3p         | 1 |

|                   |                     |   |
|-------------------|---------------------|---|
| <i>circCCDC66</i> | miR-6861-5p         | 1 |
| <i>circCCDC66</i> | miR-6864-5p         | 1 |
| <i>circCCDC66</i> | miR-6867-5p         | 1 |
| <i>circCCDC66</i> | miR-6881-3p         | 2 |
| <i>circCCDC66</i> | miR-6888-3p         | 1 |
| <i>circCCDC66</i> | miR-6888-5p         | 1 |
| <i>circCCDC66</i> | miR-6890-3p         | 1 |
| <i>circCCDC66</i> | miR-7111-3p         | 2 |
| <i>circCCDC66</i> | miR-7151-5p         | 2 |
| <i>circCCDC66</i> | miR-7160-5p         | 1 |
| <i>circCCDC66</i> | miR-764             | 2 |
| <i>circCCDC66</i> | miR-766-3p          | 2 |
| <i>circCCDC66</i> | miR-7851-3p         | 1 |
| <i>circCCDC66</i> | miR-8068            | 2 |
| <i>circCCDC66</i> | miR-8077            | 1 |
| <i>circCCDC66</i> | miR-922             | 2 |
| <i>circCCDC66</i> | miR-93-3p           | 1 |
| <i>circCCSER1</i> | let-7-5p/98-5p      | 1 |
| <i>circCCSER1</i> | miR-103-3p/107      | 2 |
| <i>circCCSER1</i> | miR-1178-3p         | 1 |
| <i>circCCSER1</i> | miR-1179            | 1 |
| <i>circCCSER1</i> | miR-1180-3p         | 1 |
| <i>circCCSER1</i> | miR-1183            | 1 |
| <i>circCCSER1</i> | miR-1184            | 1 |
| <i>circCCSER1</i> | miR-1185-5p         | 1 |
| <i>circCCSER1</i> | miR-1199-5p/6751-3p | 2 |
| <i>circCCSER1</i> | miR-1200            | 1 |
| <i>circCCSER1</i> | miR-1202/3972       | 1 |
| <i>circCCSER1</i> | miR-1205            | 1 |
| <i>circCCSER1</i> | miR-1206            | 3 |
| <i>circCCSER1</i> | miR-1207-5p/4763-3p | 2 |
| <i>circCCSER1</i> | miR-1208            | 1 |
| <i>circCCSER1</i> | miR-1226-3p         | 2 |
| <i>circCCSER1</i> | miR-1226-5p         | 1 |
| <i>circCCSER1</i> | miR-1231            | 1 |
| <i>circCCSER1</i> | miR-1233-5p/6778-5p | 1 |
| <i>circCCSER1</i> | miR-1237-3p         | 3 |
| <i>circCCSER1</i> | miR-1238-5p/4758-5p | 2 |

|                   |                    |   |
|-------------------|--------------------|---|
| <i>circCCSER1</i> | miR-1243           | 1 |
| <i>circCCSER1</i> | miR-1246           | 3 |
| <i>circCCSER1</i> | miR-1247-3p        | 1 |
| <i>circCCSER1</i> | miR-1248           | 3 |
| <i>circCCSER1</i> | miR-1250-3p        | 4 |
| <i>circCCSER1</i> | miR-1252-5p        | 3 |
| <i>circCCSER1</i> | miR-1263           | 1 |
| <i>circCCSER1</i> | miR-1265           | 3 |
| <i>circCCSER1</i> | miR-1267           | 2 |
| <i>circCCSER1</i> | miR-1269           | 1 |
| <i>circCCSER1</i> | miR-1272           | 2 |
| <i>circCCSER1</i> | miR-1273f          | 1 |
| <i>circCCSER1</i> | miR-1276           | 1 |
| <i>circCCSER1</i> | miR-1279           | 1 |
| <i>circCCSER1</i> | miR-128-3p         | 1 |
| <i>circCCSER1</i> | miR-1283           | 1 |
| <i>circCCSER1</i> | miR-1286           | 2 |
| <i>circCCSER1</i> | miR-1287-5p        | 1 |
| <i>circCCSER1</i> | miR-1288-3p        | 1 |
| <i>circCCSER1</i> | miR-129-5p         | 3 |
| <i>circCCSER1</i> | miR-1290           | 2 |
| <i>circCCSER1</i> | miR-1292-5p        | 1 |
| <i>circCCSER1</i> | miR-1296-3p        | 1 |
| <i>circCCSER1</i> | miR-1298-5p        | 1 |
| <i>circCCSER1</i> | miR-1304-3p        | 1 |
| <i>circCCSER1</i> | miR-1304-5p        | 1 |
| <i>circCCSER1</i> | miR-1305           | 3 |
| <i>circCCSER1</i> | miR-130b-5p        | 4 |
| <i>circCCSER1</i> | miR-132-3p/212-3p  | 1 |
| <i>circCCSER1</i> | miR-1322           | 2 |
| <i>circCCSER1</i> | miR-1324           | 1 |
| <i>circCCSER1</i> | miR-133a-3p.2/133b | 1 |
| <i>circCCSER1</i> | miR-133a-5p        | 1 |
| <i>circCCSER1</i> | miR-137            | 2 |
| <i>circCCSER1</i> | miR-138-5p         | 1 |
| <i>circCCSER1</i> | miR-139-3p         | 1 |
| <i>circCCSER1</i> | miR-140-3p.1       | 1 |
| <i>circCCSER1</i> | miR-141-3p/200-3p  | 1 |

|                   |                                      |   |
|-------------------|--------------------------------------|---|
| <i>circCCSER1</i> | miR-141-5p                           | 3 |
| <i>circCCSER1</i> | miR-143-3p                           | 1 |
| <i>circCCSER1</i> | miR-143-5p                           | 1 |
| <i>circCCSER1</i> | miR-145-3p                           | 1 |
| <i>circCCSER1</i> | miR-1468-5p                          | 1 |
| <i>circCCSER1</i> | miR-146a-3p                          | 3 |
| <i>circCCSER1</i> | miR-148-3p/152-3p                    | 2 |
| <i>circCCSER1</i> | miR-148a-5p                          | 1 |
| <i>circCCSER1</i> | miR-148b-5p/6874-3p                  | 1 |
| <i>circCCSER1</i> | miR-149-5p                           | 1 |
| <i>circCCSER1</i> | miR-15-5p/16-5p/195-5p/424-5p/497-5p | 2 |
| <i>circCCSER1</i> | miR-150-3p                           | 1 |
| <i>circCCSER1</i> | miR-151-5p                           | 1 |
| <i>circCCSER1</i> | miR-152-5p                           | 2 |
| <i>circCCSER1</i> | miR-153-3p                           | 1 |
| <i>circCCSER1</i> | miR-153-5p                           | 3 |
| <i>circCCSER1</i> | miR-154-5p                           | 1 |
| <i>circCCSER1</i> | miR-15b-3p                           | 4 |
| <i>circCCSER1</i> | miR-17-3p                            | 1 |
| <i>circCCSER1</i> | miR-18-5p                            | 2 |
| <i>circCCSER1</i> | miR-181-5p                           | 1 |
| <i>circCCSER1</i> | miR-182-5p                           | 3 |
| <i>circCCSER1</i> | miR-183-3p                           | 1 |
| <i>circCCSER1</i> | miR-185-5p                           | 1 |
| <i>circCCSER1</i> | miR-188-5p                           | 2 |
| <i>circCCSER1</i> | miR-18a-3p                           | 1 |
| <i>circCCSER1</i> | miR-19-5p                            | 2 |
| <i>circCCSER1</i> | miR-1909-5p                          | 1 |
| <i>circCCSER1</i> | miR-1911-5p                          | 1 |
| <i>circCCSER1</i> | miR-1914-5p                          | 1 |
| <i>circCCSER1</i> | miR-1915-3p/6764-5p                  | 1 |
| <i>circCCSER1</i> | miR-193-3p                           | 2 |
| <i>circCCSER1</i> | miR-194-3p                           | 1 |
| <i>circCCSER1</i> | miR-194-5p                           | 1 |
| <i>circCCSER1</i> | miR-196-5p                           | 2 |
| <i>circCCSER1</i> | miR-196a-3p                          | 1 |
| <i>circCCSER1</i> | miR-197-3p                           | 3 |
| <i>circCCSER1</i> | miR-197-5p/3132                      | 1 |

|                   |                                     |   |
|-------------------|-------------------------------------|---|
| <i>circCCSER1</i> | miR-200-3p/429                      | 2 |
| <i>circCCSER1</i> | miR-200c-5p/550a-3p                 | 1 |
| <i>circCCSER1</i> | miR-203a-3p.1                       | 2 |
| <i>circCCSER1</i> | miR-203b-3p                         | 1 |
| <i>circCCSER1</i> | miR-204-5p/211-5p                   | 3 |
| <i>circCCSER1</i> | miR-205-3p                          | 1 |
| <i>circCCSER1</i> | miR-205-5p                          | 2 |
| <i>circCCSER1</i> | miR-2052                            | 2 |
| <i>circCCSER1</i> | miR-2053                            | 3 |
| <i>circCCSER1</i> | miR-2054                            | 1 |
| <i>circCCSER1</i> | miR-20a-3p                          | 1 |
| <i>circCCSER1</i> | miR-20b-3p                          | 1 |
| <i>circCCSER1</i> | miR-2110                            | 1 |
| <i>circCCSER1</i> | miR-2114-5p                         | 1 |
| <i>circCCSER1</i> | miR-2115-5p                         | 3 |
| <i>circCCSER1</i> | miR-2116-5p                         | 1 |
| <i>circCCSER1</i> | miR-2117                            | 1 |
| <i>circCCSER1</i> | miR-212-5p                          | 1 |
| <i>circCCSER1</i> | miR-214-3p/3619-5p                  | 4 |
| <i>circCCSER1</i> | miR-215-3p                          | 1 |
| <i>circCCSER1</i> | miR-218-5p                          | 1 |
| <i>circCCSER1</i> | miR-219-5p                          | 1 |
| <i>circCCSER1</i> | miR-219a-2-3p                       | 1 |
| <i>circCCSER1</i> | miR-219b-3p                         | 1 |
| <i>circCCSER1</i> | miR-22-5p                           | 1 |
| <i>circCCSER1</i> | miR-221-3p/222-3p                   | 2 |
| <i>circCCSER1</i> | miR-223-5p                          | 1 |
| <i>circCCSER1</i> | miR-2276-5p                         | 1 |
| <i>circCCSER1</i> | miR-2355-3p                         | 1 |
| <i>circCCSER1</i> | miR-2355-5p                         | 1 |
| <i>circCCSER1</i> | miR-24-3p                           | 2 |
| <i>circCCSER1</i> | miR-2467-3p                         | 1 |
| <i>circCCSER1</i> | miR-25-3p/32-5p/92-3p/363-3p/367-3p | 1 |
| <i>circCCSER1</i> | miR-2681-3p                         | 1 |
| <i>circCCSER1</i> | miR-2681-5p                         | 2 |
| <i>circCCSER1</i> | miR-26b-3p                          | 3 |
| <i>circCCSER1</i> | miR-27-3p                           | 1 |
| <i>circCCSER1</i> | miR-27b-5p                          | 2 |

|                   |                       |   |
|-------------------|-----------------------|---|
| <i>circCCSER1</i> | miR-29-3p             | 1 |
| <i>circCCSER1</i> | miR-2909              | 1 |
| <i>circCCSER1</i> | miR-298               | 2 |
| <i>circCCSER1</i> | miR-29b-1-5p          | 2 |
| <i>circCCSER1</i> | miR-30-3p             | 1 |
| <i>circCCSER1</i> | miR-301a-5p/301b-5p   | 1 |
| <i>circCCSER1</i> | miR-302a-5p           | 2 |
| <i>circCCSER1</i> | miR-302c-3p.2/520-3p  | 3 |
| <i>circCCSER1</i> | miR-302c-5p           | 1 |
| <i>circCCSER1</i> | miR-302f              | 1 |
| <i>circCCSER1</i> | miR-3064-3p           | 1 |
| <i>circCCSER1</i> | miR-3074-5p           | 1 |
| <i>circCCSER1</i> | miR-31-5p             | 1 |
| <i>circCCSER1</i> | miR-3120-3p           | 1 |
| <i>circCCSER1</i> | miR-3121-3p           | 2 |
| <i>circCCSER1</i> | miR-3122/3913-5p      | 1 |
| <i>circCCSER1</i> | miR-3123              | 1 |
| <i>circCCSER1</i> | miR-3125/3916/6859-5p | 1 |
| <i>circCCSER1</i> | miR-3126-5p           | 1 |
| <i>circCCSER1</i> | miR-3127-3p/6756-3p   | 2 |
| <i>circCCSER1</i> | miR-3128              | 1 |
| <i>circCCSER1</i> | miR-3134              | 2 |
| <i>circCCSER1</i> | miR-3135b             | 1 |
| <i>circCCSER1</i> | miR-3136-5p/4439      | 1 |
| <i>circCCSER1</i> | miR-3137              | 1 |
| <i>circCCSER1</i> | miR-3138              | 1 |
| <i>circCCSER1</i> | miR-3150a-3p          | 1 |
| <i>circCCSER1</i> | miR-3154              | 2 |
| <i>circCCSER1</i> | miR-3156-5p           | 2 |
| <i>circCCSER1</i> | miR-3158-5p           | 1 |
| <i>circCCSER1</i> | miR-3159              | 2 |
| <i>circCCSER1</i> | miR-3160-3p           | 1 |
| <i>circCCSER1</i> | miR-3160-5p           | 2 |
| <i>circCCSER1</i> | miR-3162-5p           | 1 |
| <i>circCCSER1</i> | miR-3163              | 1 |
| <i>circCCSER1</i> | miR-3165              | 1 |
| <i>circCCSER1</i> | miR-3168              | 1 |
| <i>circCCSER1</i> | miR-3173-3p/6891-5p   | 3 |



|                   |                           |   |
|-------------------|---------------------------|---|
| <i>circCCSER1</i> | miR-3174                  | 1 |
| <i>circCCSER1</i> | miR-3175                  | 1 |
| <i>circCCSER1</i> | miR-3182                  | 5 |
| <i>circCCSER1</i> | miR-3183/4723-3p/6769b-3p | 1 |
| <i>circCCSER1</i> | miR-3185                  | 5 |
| <i>circCCSER1</i> | miR-3187-3p               | 1 |
| <i>circCCSER1</i> | miR-3189-3p               | 1 |
| <i>circCCSER1</i> | miR-3190-3p               | 1 |
| <i>circCCSER1</i> | miR-3191-5p               | 1 |
| <i>circCCSER1</i> | miR-3192-3p               | 1 |
| <i>circCCSER1</i> | miR-3193                  | 1 |
| <i>circCCSER1</i> | miR-3194-3p               | 1 |
| <i>circCCSER1</i> | miR-32-3p                 | 2 |
| <i>circCCSER1</i> | miR-3200-5p               | 3 |
| <i>circCCSER1</i> | miR-3202                  | 2 |
| <i>circCCSER1</i> | miR-324-3p/1913           | 1 |
| <i>circCCSER1</i> | miR-324-5p                | 1 |
| <i>circCCSER1</i> | miR-329-5p                | 1 |
| <i>circCCSER1</i> | miR-330-3p.2              | 1 |
| <i>circCCSER1</i> | miR-331-3p                | 1 |
| <i>circCCSER1</i> | miR-331-5p                | 2 |
| <i>circCCSER1</i> | miR-338-3p                | 1 |
| <i>circCCSER1</i> | miR-33b-3p/515-3p/519e-3p | 1 |
| <i>circCCSER1</i> | miR-340-5p                | 2 |
| <i>circCCSER1</i> | miR-342-3p                | 1 |
| <i>circCCSER1</i> | miR-34a-3p                | 1 |
| <i>circCCSER1</i> | miR-3591-5p               | 1 |
| <i>circCCSER1</i> | miR-3605-3p               | 1 |
| <i>circCCSER1</i> | miR-3605-5p               | 1 |
| <i>circCCSER1</i> | miR-3606-5p               | 1 |
| <i>circCCSER1</i> | miR-3607-3p               | 1 |
| <i>circCCSER1</i> | miR-3607-5p               | 2 |
| <i>circCCSER1</i> | miR-361-3p                | 1 |
| <i>circCCSER1</i> | miR-3611                  | 2 |
| <i>circCCSER1</i> | miR-3613-5p               | 1 |
| <i>circCCSER1</i> | miR-3614-5p               | 1 |
| <i>circCCSER1</i> | miR-3617-3p               | 1 |
| <i>circCCSER1</i> | miR-3620-3p               | 1 |

|                   |                   |   |
|-------------------|-------------------|---|
| <i>circCCSER1</i> | miR-3654          | 1 |
| <i>circCCSER1</i> | miR-3662          | 1 |
| <i>circCCSER1</i> | miR-3663-3p       | 1 |
| <i>circCCSER1</i> | miR-3663-5p       | 1 |
| <i>circCCSER1</i> | miR-3665          | 1 |
| <i>circCCSER1</i> | miR-367-5p        | 2 |
| <i>circCCSER1</i> | miR-3672/6864-3p  | 1 |
| <i>circCCSER1</i> | miR-3674          | 1 |
| <i>circCCSER1</i> | miR-3677-5p       | 1 |
| <i>circCCSER1</i> | miR-3679-3p       | 1 |
| <i>circCCSER1</i> | miR-3682-3p       | 2 |
| <i>circCCSER1</i> | miR-3682-5p       | 1 |
| <i>circCCSER1</i> | miR-3686          | 1 |
| <i>circCCSER1</i> | miR-3688-3p       | 1 |
| <i>circCCSER1</i> | miR-3691-3p       | 1 |
| <i>circCCSER1</i> | miR-3692-3p       | 1 |
| <i>circCCSER1</i> | miR-3692-5p       | 1 |
| <i>circCCSER1</i> | miR-370-3p        | 3 |
| <i>circCCSER1</i> | miR-371a-3p       | 1 |
| <i>circCCSER1</i> | miR-371b-3p       | 1 |
| <i>circCCSER1</i> | miR-374-5p/655-3p | 2 |
| <i>circCCSER1</i> | miR-374b-3p       | 1 |
| <i>circCCSER1</i> | miR-375           | 2 |
| <i>circCCSER1</i> | miR-376a-2-5p     | 1 |
| <i>circCCSER1</i> | miR-376a-5p       | 1 |
| <i>circCCSER1</i> | miR-377-3p        | 1 |
| <i>circCCSER1</i> | miR-377-5p/6086   | 1 |
| <i>circCCSER1</i> | miR-378a-5p       | 1 |
| <i>circCCSER1</i> | miR-379-5p        | 2 |
| <i>circCCSER1</i> | miR-380-5p/563    | 1 |
| <i>circCCSER1</i> | miR-382-3p        | 2 |
| <i>circCCSER1</i> | miR-382-5p        | 1 |
| <i>circCCSER1</i> | miR-383-5p.1      | 1 |
| <i>circCCSER1</i> | miR-383-5p.2      | 1 |
| <i>circCCSER1</i> | miR-3908          | 1 |
| <i>circCCSER1</i> | miR-3913-3p       | 1 |
| <i>circCCSER1</i> | miR-3914          | 1 |
| <i>circCCSER1</i> | miR-3920          | 1 |

|                   |                       |   |
|-------------------|-----------------------|---|
| <i>circCCSER1</i> | miR-3921/4653-5p      | 1 |
| <i>circCCSER1</i> | miR-3922-5p           | 1 |
| <i>circCCSER1</i> | miR-3925-5p           | 1 |
| <i>circCCSER1</i> | miR-3926              | 1 |
| <i>circCCSER1</i> | miR-3927-3p/6831-5p   | 2 |
| <i>circCCSER1</i> | miR-3928-3p           | 1 |
| <i>circCCSER1</i> | miR-3928-5p/6806-3p   | 2 |
| <i>circCCSER1</i> | miR-3935              | 1 |
| <i>circCCSER1</i> | miR-3942-3p           | 2 |
| <i>circCCSER1</i> | miR-3942-5p           | 1 |
| <i>circCCSER1</i> | miR-3973              | 1 |
| <i>circCCSER1</i> | miR-3977              | 3 |
| <i>circCCSER1</i> | miR-409-3p            | 1 |
| <i>circCCSER1</i> | miR-409-5p            | 1 |
| <i>circCCSER1</i> | miR-412-3p/6754-3p    | 2 |
| <i>circCCSER1</i> | miR-4251              | 2 |
| <i>circCCSER1</i> | miR-4256              | 1 |
| <i>circCCSER1</i> | miR-4257              | 1 |
| <i>circCCSER1</i> | miR-4260              | 1 |
| <i>circCCSER1</i> | miR-4264              | 1 |
| <i>circCCSER1</i> | miR-4268              | 1 |
| <i>circCCSER1</i> | miR-4270/4441/6754-5p | 1 |
| <i>circCCSER1</i> | miR-4273/7156-5p      | 1 |
| <i>circCCSER1</i> | miR-4276              | 1 |
| <i>circCCSER1</i> | miR-4277              | 1 |
| <i>circCCSER1</i> | miR-4279              | 1 |
| <i>circCCSER1</i> | miR-4282              | 2 |
| <i>circCCSER1</i> | miR-4284              | 2 |
| <i>circCCSER1</i> | miR-4287/4685-3p      | 1 |
| <i>circCCSER1</i> | miR-4289              | 2 |
| <i>circCCSER1</i> | miR-4291              | 2 |
| <i>circCCSER1</i> | miR-4292/6791-5p      | 1 |
| <i>circCCSER1</i> | miR-4297/5581-5p      | 1 |
| <i>circCCSER1</i> | miR-4303              | 3 |
| <i>circCCSER1</i> | miR-4307              | 2 |
| <i>circCCSER1</i> | miR-4308              | 1 |
| <i>circCCSER1</i> | miR-431-5p            | 1 |
| <i>circCCSER1</i> | miR-4310/7157-5p      | 1 |

|                   |                                    |   |
|-------------------|------------------------------------|---|
| <i>circCCSER1</i> | miR-4311                           | 1 |
| <i>circCCSER1</i> | miR-4318                           | 3 |
| <i>circCCSER1</i> | miR-4324                           | 2 |
| <i>circCCSER1</i> | miR-4325                           | 1 |
| <i>circCCSER1</i> | miR-4327                           | 1 |
| <i>circCCSER1</i> | miR-4328                           | 1 |
| <i>circCCSER1</i> | miR-4329                           | 2 |
| <i>circCCSER1</i> | miR-4419a/4510/6127/6129/6130/6133 | 1 |
| <i>circCCSER1</i> | miR-4422                           | 1 |
| <i>circCCSER1</i> | miR-4424                           | 1 |
| <i>circCCSER1</i> | miR-4426/4647/4662b                | 3 |
| <i>circCCSER1</i> | miR-4427                           | 1 |
| <i>circCCSER1</i> | miR-4428                           | 3 |
| <i>circCCSER1</i> | miR-4433a-3p                       | 1 |
| <i>circCCSER1</i> | miR-4433b-3p                       | 1 |
| <i>circCCSER1</i> | miR-4433b-5p                       | 1 |
| <i>circCCSER1</i> | miR-4435                           | 1 |
| <i>circCCSER1</i> | miR-4436b-5p                       | 1 |
| <i>circCCSER1</i> | miR-4445-5p                        | 1 |
| <i>circCCSER1</i> | miR-4446-5p                        | 2 |
| <i>circCCSER1</i> | miR-4448                           | 1 |
| <i>circCCSER1</i> | miR-4451                           | 2 |
| <i>circCCSER1</i> | miR-4452                           | 1 |
| <i>circCCSER1</i> | miR-4453/4538                      | 1 |
| <i>circCCSER1</i> | miR-4459                           | 1 |
| <i>circCCSER1</i> | miR-4461                           | 1 |
| <i>circCCSER1</i> | miR-4463                           | 1 |
| <i>circCCSER1</i> | miR-4464/4748                      | 1 |
| <i>circCCSER1</i> | miR-4469                           | 1 |
| <i>circCCSER1</i> | miR-4471/8059                      | 1 |
| <i>circCCSER1</i> | miR-4473                           | 1 |
| <i>circCCSER1</i> | miR-4474-3p                        | 1 |
| <i>circCCSER1</i> | miR-4476/6876-5p                   | 1 |
| <i>circCCSER1</i> | miR-4477a                          | 2 |
| <i>circCCSER1</i> | miR-448                            | 1 |
| <i>circCCSER1</i> | miR-4481/4745-5p                   | 1 |
| <i>circCCSER1</i> | miR-4482-3p                        | 2 |
| <i>circCCSER1</i> | miR-4484                           | 1 |

|                   |                       |   |
|-------------------|-----------------------|---|
| <i>circCCSER1</i> | miR-4487              | 1 |
| <i>circCCSER1</i> | miR-4490              | 1 |
| <i>circCCSER1</i> | miR-4494              | 1 |
| <i>circCCSER1</i> | miR-4499              | 1 |
| <i>circCCSER1</i> | miR-4501              | 2 |
| <i>circCCSER1</i> | miR-450a-1-3p         | 1 |
| <i>circCCSER1</i> | miR-450a-2-3p         | 1 |
| <i>circCCSER1</i> | miR-450b-3p/769-3p    | 1 |
| <i>circCCSER1</i> | miR-4511              | 4 |
| <i>circCCSER1</i> | miR-4513/6855-3p      | 1 |
| <i>circCCSER1</i> | miR-4515              | 1 |
| <i>circCCSER1</i> | miR-4517              | 4 |
| <i>circCCSER1</i> | miR-452-5p/892-3p     | 4 |
| <i>circCCSER1</i> | miR-4520-3p           | 1 |
| <i>circCCSER1</i> | miR-4521              | 1 |
| <i>circCCSER1</i> | miR-4524-5p           | 2 |
| <i>circCCSER1</i> | miR-4524a-3p          | 1 |
| <i>circCCSER1</i> | miR-4530              | 1 |
| <i>circCCSER1</i> | miR-4533              | 2 |
| <i>circCCSER1</i> | miR-4534/8082         | 2 |
| <i>circCCSER1</i> | miR-4536-5p           | 1 |
| <i>circCCSER1</i> | miR-455-3p.2          | 1 |
| <i>circCCSER1</i> | miR-4646-3p           | 1 |
| <i>circCCSER1</i> | miR-4648              | 1 |
| <i>circCCSER1</i> | miR-4650-3p           | 2 |
| <i>circCCSER1</i> | miR-4652-3p           | 4 |
| <i>circCCSER1</i> | miR-4653-3p           | 1 |
| <i>circCCSER1</i> | miR-4654/4769-5p      | 1 |
| <i>circCCSER1</i> | miR-4655-5p           | 1 |
| <i>circCCSER1</i> | miR-4658/6790-5p      | 2 |
| <i>circCCSER1</i> | miR-4659a-3p/4659b-3p | 5 |
| <i>circCCSER1</i> | miR-4659a-5p/4659b-5p | 1 |
| <i>circCCSER1</i> | miR-4661-3p           | 1 |
| <i>circCCSER1</i> | miR-4664-3p           | 1 |
| <i>circCCSER1</i> | miR-4666a-5p          | 2 |
| <i>circCCSER1</i> | miR-4668-3p           | 3 |
| <i>circCCSER1</i> | miR-4671-3p           | 1 |
| <i>circCCSER1</i> | miR-4677-3p           | 3 |

|                   |                             |   |
|-------------------|-----------------------------|---|
| <i>circCCSER1</i> | miR-4677-5p                 | 1 |
| <i>circCCSER1</i> | miR-4678                    | 2 |
| <i>circCCSER1</i> | miR-4679                    | 3 |
| <i>circCCSER1</i> | miR-4680-3p                 | 1 |
| <i>circCCSER1</i> | miR-4682                    | 2 |
| <i>circCCSER1</i> | miR-4683                    | 1 |
| <i>circCCSER1</i> | miR-4684-5p                 | 1 |
| <i>circCCSER1</i> | miR-4685-5p/6837-5p         | 1 |
| <i>circCCSER1</i> | miR-4686                    | 1 |
| <i>circCCSER1</i> | miR-4690-5p                 | 1 |
| <i>circCCSER1</i> | miR-4691-5p/6792-3p         | 1 |
| <i>circCCSER1</i> | miR-4693-5p                 | 1 |
| <i>circCCSER1</i> | miR-4694-3p                 | 2 |
| <i>circCCSER1</i> | miR-4696                    | 1 |
| <i>circCCSER1</i> | miR-4698                    | 2 |
| <i>circCCSER1</i> | miR-4699-5p                 | 3 |
| <i>circCCSER1</i> | miR-4700-3p                 | 1 |
| <i>circCCSER1</i> | miR-4703-3p                 | 1 |
| <i>circCCSER1</i> | miR-4704-3p                 | 1 |
| <i>circCCSER1</i> | miR-4708-5p                 | 1 |
| <i>circCCSER1</i> | miR-4709-3p                 | 7 |
| <i>circCCSER1</i> | miR-4709-5p                 | 1 |
| <i>circCCSER1</i> | miR-4711-3p                 | 1 |
| <i>circCCSER1</i> | miR-4712-3p                 | 1 |
| <i>circCCSER1</i> | miR-4716-5p                 | 2 |
| <i>circCCSER1</i> | miR-4720-3p                 | 1 |
| <i>circCCSER1</i> | miR-4720-5p/4799-3p/5588-5p | 1 |
| <i>circCCSER1</i> | miR-4722-3p/6727-3p         | 1 |
| <i>circCCSER1</i> | miR-4722-5p                 | 2 |
| <i>circCCSER1</i> | miR-4725-5p                 | 1 |
| <i>circCCSER1</i> | miR-4726-3p                 | 1 |
| <i>circCCSER1</i> | miR-4733-3p                 | 2 |
| <i>circCCSER1</i> | miR-4736                    | 2 |
| <i>circCCSER1</i> | miR-4739                    | 1 |
| <i>circCCSER1</i> | miR-4740-5p                 | 1 |
| <i>circCCSER1</i> | miR-4742-3p                 | 1 |
| <i>circCCSER1</i> | miR-4743-3p                 | 4 |
| <i>circCCSER1</i> | miR-4752                    | 1 |

|                   |                             |   |
|-------------------|-----------------------------|---|
| <i>circCCSER1</i> | miR-4753-3p                 | 2 |
| <i>circCCSER1</i> | miR-4755-5p/5006-3p         | 1 |
| <i>circCCSER1</i> | miR-4760-3p                 | 1 |
| <i>circCCSER1</i> | miR-4760-5p/8061            | 1 |
| <i>circCCSER1</i> | miR-4762-3p                 | 4 |
| <i>circCCSER1</i> | miR-4766-5p                 | 2 |
| <i>circCCSER1</i> | miR-4768-3p                 | 1 |
| <i>circCCSER1</i> | miR-4768-5p/6833-3p         | 2 |
| <i>circCCSER1</i> | miR-4772-5p                 | 1 |
| <i>circCCSER1</i> | miR-4773                    | 1 |
| <i>circCCSER1</i> | miR-4774-5p                 | 1 |
| <i>circCCSER1</i> | miR-4776-3p                 | 1 |
| <i>circCCSER1</i> | miR-4778-3p                 | 5 |
| <i>circCCSER1</i> | miR-4778-5p                 | 2 |
| <i>circCCSER1</i> | miR-4781-3p                 | 1 |
| <i>circCCSER1</i> | miR-4786-5p                 | 1 |
| <i>circCCSER1</i> | miR-4788                    | 1 |
| <i>circCCSER1</i> | miR-4795-3p                 | 2 |
| <i>circCCSER1</i> | miR-4796-3p                 | 1 |
| <i>circCCSER1</i> | miR-4797-3p                 | 1 |
| <i>circCCSER1</i> | miR-4800-5p                 | 1 |
| <i>circCCSER1</i> | miR-4804-3p                 | 1 |
| <i>circCCSER1</i> | miR-483-3p.2                | 1 |
| <i>circCCSER1</i> | miR-490-3p                  | 3 |
| <i>circCCSER1</i> | miR-493-3p                  | 2 |
| <i>circCCSER1</i> | miR-495-5p                  | 1 |
| <i>circCCSER1</i> | miR-496.2                   | 3 |
| <i>circCCSER1</i> | miR-499b-5p                 | 1 |
| <i>circCCSER1</i> | miR-5000-5p                 | 1 |
| <i>circCCSER1</i> | miR-5002-3p                 | 1 |
| <i>circCCSER1</i> | miR-5003-3p                 | 2 |
| <i>circCCSER1</i> | miR-5006-5p                 | 1 |
| <i>circCCSER1</i> | miR-5007-3p                 | 2 |
| <i>circCCSER1</i> | miR-5008-3p/6737-3p/7157-3p | 1 |
| <i>circCCSER1</i> | miR-5009-5p/8058            | 1 |
| <i>circCCSER1</i> | miR-500a-5p                 | 1 |
| <i>circCCSER1</i> | miR-502-5p                  | 2 |
| <i>circCCSER1</i> | miR-503-5p                  | 2 |

|                   |                             |   |
|-------------------|-----------------------------|---|
| <i>circCCSER1</i> | miR-504-3p                  | 1 |
| <i>circCCSER1</i> | miR-506-5p                  | 2 |
| <i>circCCSER1</i> | miR-508-3p                  | 1 |
| <i>circCCSER1</i> | miR-5088-3p                 | 2 |
| <i>circCCSER1</i> | miR-5089-3p                 | 3 |
| <i>circCCSER1</i> | miR-5089-5p                 | 1 |
| <i>circCCSER1</i> | miR-509-3p                  | 1 |
| <i>circCCSER1</i> | miR-5092                    | 1 |
| <i>circCCSER1</i> | miR-5095/7151-3p            | 1 |
| <i>circCCSER1</i> | miR-5096                    | 2 |
| <i>circCCSER1</i> | miR-510-3p                  | 1 |
| <i>circCCSER1</i> | miR-511-5p                  | 3 |
| <i>circCCSER1</i> | miR-512-3p                  | 3 |
| <i>circCCSER1</i> | miR-512-5p                  | 1 |
| <i>circCCSER1</i> | miR-513a-3p/513c-3p/3606-3p | 1 |
| <i>circCCSER1</i> | miR-513a-5p                 | 1 |
| <i>circCCSER1</i> | miR-513b-3p                 | 1 |
| <i>circCCSER1</i> | miR-516a-3p/516b-3p/7162-5p | 3 |
| <i>circCCSER1</i> | miR-5186                    | 1 |
| <i>circCCSER1</i> | miR-5187-3p                 | 1 |
| <i>circCCSER1</i> | miR-5187-5p                 | 1 |
| <i>circCCSER1</i> | miR-5192                    | 1 |
| <i>circCCSER1</i> | miR-519d-5p                 | 1 |
| <i>circCCSER1</i> | miR-520f-5p                 | 1 |
| <i>circCCSER1</i> | miR-520g-3p                 | 1 |
| <i>circCCSER1</i> | miR-522-3p                  | 2 |
| <i>circCCSER1</i> | miR-524-5p                  | 1 |
| <i>circCCSER1</i> | miR-526b-5p                 | 1 |
| <i>circCCSER1</i> | miR-544a                    | 2 |
| <i>circCCSER1</i> | miR-544b                    | 2 |
| <i>circCCSER1</i> | miR-548an                   | 1 |
| <i>circCCSER1</i> | miR-548ao-5p/548ax          | 2 |
| <i>circCCSER1</i> | miR-548ap-3p/548aa/548t-3p  | 1 |
| <i>circCCSER1</i> | miR-548as-3p                | 1 |
| <i>circCCSER1</i> | miR-548at-5p                | 1 |
| <i>circCCSER1</i> | miR-548av-3p                | 3 |
| <i>circCCSER1</i> | miR-548ay-3p/548at-3p       | 1 |
| <i>circCCSER1</i> | miR-548b-3p                 | 4 |



|                   |                               |   |
|-------------------|-------------------------------|---|
| <i>circCCSER1</i> | miR-548c-3p                   | 3 |
| <i>circCCSER1</i> | miR-548p                      | 1 |
| <i>circCCSER1</i> | miR-548s                      | 1 |
| <i>circCCSER1</i> | miR-548u/7161-5p              | 1 |
| <i>circCCSER1</i> | miR-548v                      | 2 |
| <i>circCCSER1</i> | miR-550a-3-5p/550a-5p/1271-3p | 1 |
| <i>circCCSER1</i> | miR-550b-3p                   | 1 |
| <i>circCCSER1</i> | miR-551b-5p                   | 1 |
| <i>circCCSER1</i> | miR-552-3p                    | 1 |
| <i>circCCSER1</i> | miR-556-3p                    | 1 |
| <i>circCCSER1</i> | miR-5571-5p                   | 1 |
| <i>circCCSER1</i> | miR-5572                      | 1 |
| <i>circCCSER1</i> | miR-5579-3p                   | 1 |
| <i>circCCSER1</i> | miR-558                       | 1 |
| <i>circCCSER1</i> | miR-5581-3p                   | 2 |
| <i>circCCSER1</i> | miR-5583-3p                   | 4 |
| <i>circCCSER1</i> | miR-5584-3p                   | 1 |
| <i>circCCSER1</i> | miR-5584-5p                   | 1 |
| <i>circCCSER1</i> | miR-5585-3p                   | 1 |
| <i>circCCSER1</i> | miR-5585-5p                   | 2 |
| <i>circCCSER1</i> | miR-5588-3p                   | 1 |
| <i>circCCSER1</i> | miR-5590-5p                   | 1 |
| <i>circCCSER1</i> | miR-561-3p                    | 1 |
| <i>circCCSER1</i> | miR-561-5p                    | 1 |
| <i>circCCSER1</i> | miR-562                       | 2 |
| <i>circCCSER1</i> | miR-5681b                     | 2 |
| <i>circCCSER1</i> | miR-5687                      | 1 |
| <i>circCCSER1</i> | miR-569                       | 1 |
| <i>circCCSER1</i> | miR-5691                      | 3 |
| <i>circCCSER1</i> | miR-5693                      | 1 |
| <i>circCCSER1</i> | miR-5694                      | 1 |
| <i>circCCSER1</i> | miR-5695                      | 1 |
| <i>circCCSER1</i> | miR-5696                      | 3 |
| <i>circCCSER1</i> | miR-5700                      | 1 |
| <i>circCCSER1</i> | miR-572                       | 2 |
| <i>circCCSER1</i> | miR-578                       | 1 |
| <i>circCCSER1</i> | miR-579-3p                    | 3 |
| <i>circCCSER1</i> | miR-580-3p                    | 1 |

|                   |                 |   |
|-------------------|-----------------|---|
| <i>circCCSER1</i> | miR-582-3p      | 1 |
| <i>circCCSER1</i> | miR-583         | 1 |
| <i>circCCSER1</i> | miR-584-5p      | 1 |
| <i>circCCSER1</i> | miR-586         | 1 |
| <i>circCCSER1</i> | miR-587         | 2 |
| <i>circCCSER1</i> | miR-588         | 1 |
| <i>circCCSER1</i> | miR-589-3p      | 3 |
| <i>circCCSER1</i> | miR-597-3p      | 2 |
| <i>circCCSER1</i> | miR-600         | 1 |
| <i>circCCSER1</i> | miR-605-5p      | 2 |
| <i>circCCSER1</i> | miR-606         | 1 |
| <i>circCCSER1</i> | miR-607         | 3 |
| <i>circCCSER1</i> | miR-6071        | 2 |
| <i>circCCSER1</i> | miR-6077        | 2 |
| <i>circCCSER1</i> | miR-6079        | 4 |
| <i>circCCSER1</i> | miR-611/3131    | 1 |
| <i>circCCSER1</i> | miR-6126        | 1 |
| <i>circCCSER1</i> | miR-6128        | 2 |
| <i>circCCSER1</i> | miR-6131        | 1 |
| <i>circCCSER1</i> | miR-6165        | 1 |
| <i>circCCSER1</i> | miR-622         | 1 |
| <i>circCCSER1</i> | miR-623         | 3 |
| <i>circCCSER1</i> | miR-627-5p      | 1 |
| <i>circCCSER1</i> | miR-632/4288    | 1 |
| <i>circCCSER1</i> | miR-635/6774-5p | 1 |
| <i>circCCSER1</i> | miR-640         | 1 |
| <i>circCCSER1</i> | miR-641/3617-5p | 1 |
| <i>circCCSER1</i> | miR-642-3p      | 1 |
| <i>circCCSER1</i> | miR-642b-5p     | 1 |
| <i>circCCSER1</i> | miR-643         | 1 |
| <i>circCCSER1</i> | miR-646         | 2 |
| <i>circCCSER1</i> | miR-649         | 3 |
| <i>circCCSER1</i> | miR-6499-3p     | 1 |
| <i>circCCSER1</i> | miR-6500-3p     | 1 |
| <i>circCCSER1</i> | miR-6502-3p     | 1 |
| <i>circCCSER1</i> | miR-6509-3p     | 1 |
| <i>circCCSER1</i> | miR-651-3p      | 1 |
| <i>circCCSER1</i> | miR-6510-5p     | 1 |

|                   |                     |   |
|-------------------|---------------------|---|
| <i>circCCSER1</i> | miR-6512-5p         | 2 |
| <i>circCCSER1</i> | miR-6513-5p         | 1 |
| <i>circCCSER1</i> | miR-6516-3p         | 1 |
| <i>circCCSER1</i> | miR-652-3p          | 1 |
| <i>circCCSER1</i> | miR-653-5p          | 1 |
| <i>circCCSER1</i> | miR-654-3p          | 2 |
| <i>circCCSER1</i> | miR-655-5p          | 1 |
| <i>circCCSER1</i> | miR-657             | 1 |
| <i>circCCSER1</i> | miR-663b            | 1 |
| <i>circCCSER1</i> | miR-664a-5p/4794    | 1 |
| <i>circCCSER1</i> | miR-670-5p          | 1 |
| <i>circCCSER1</i> | miR-671-5p          | 1 |
| <i>circCCSER1</i> | miR-6715b-3p        | 1 |
| <i>circCCSER1</i> | miR-6716-5p         | 1 |
| <i>circCCSER1</i> | miR-6728-5p         | 1 |
| <i>circCCSER1</i> | miR-6729-3p         | 1 |
| <i>circCCSER1</i> | miR-6731-5p/8085    | 1 |
| <i>circCCSER1</i> | miR-6732-3p         | 1 |
| <i>circCCSER1</i> | miR-6734-5p         | 1 |
| <i>circCCSER1</i> | miR-6738-3p         | 2 |
| <i>circCCSER1</i> | miR-6740-3p         | 3 |
| <i>circCCSER1</i> | miR-6740-5p         | 1 |
| <i>circCCSER1</i> | miR-6746-5p         | 1 |
| <i>circCCSER1</i> | miR-6747-3p         | 1 |
| <i>circCCSER1</i> | miR-6749-3p         | 1 |
| <i>circCCSER1</i> | miR-6750-3p         | 1 |
| <i>circCCSER1</i> | miR-6750-5p/6822-5p | 1 |
| <i>circCCSER1</i> | miR-6752-3p         | 1 |
| <i>circCCSER1</i> | miR-6753-5p         | 2 |
| <i>circCCSER1</i> | miR-6755-3p         | 2 |
| <i>circCCSER1</i> | miR-6755-5p         | 1 |
| <i>circCCSER1</i> | miR-676-5p          | 1 |
| <i>circCCSER1</i> | miR-6760-3p         | 1 |
| <i>circCCSER1</i> | miR-6760-5p         | 1 |
| <i>circCCSER1</i> | miR-6761-5p         | 2 |
| <i>circCCSER1</i> | miR-6768-3p         | 1 |
| <i>circCCSER1</i> | miR-6768-5p         | 1 |
| <i>circCCSER1</i> | miR-6772-3p         | 2 |

|                   |                     |   |
|-------------------|---------------------|---|
| <i>circCCSER1</i> | miR-6773-3p         | 1 |
| <i>circCCSER1</i> | miR-6780a-3p        | 2 |
| <i>circCCSER1</i> | miR-6794-3p         | 1 |
| <i>circCCSER1</i> | miR-6796-3p         | 1 |
| <i>circCCSER1</i> | miR-6801-3p/6810-3p | 1 |
| <i>circCCSER1</i> | miR-6806-5p         | 1 |
| <i>circCCSER1</i> | miR-6808-3p         | 1 |
| <i>circCCSER1</i> | miR-6809-3p         | 2 |
| <i>circCCSER1</i> | miR-6809-5p         | 1 |
| <i>circCCSER1</i> | miR-6810-5p         | 1 |
| <i>circCCSER1</i> | miR-6817-3p         | 4 |
| <i>circCCSER1</i> | miR-6822-3p         | 2 |
| <i>circCCSER1</i> | miR-6823-5p         | 1 |
| <i>circCCSER1</i> | miR-6825-5p         | 1 |
| <i>circCCSER1</i> | miR-6826-3p         | 3 |
| <i>circCCSER1</i> | miR-6827-5p         | 1 |
| <i>circCCSER1</i> | miR-6828-3p         | 2 |
| <i>circCCSER1</i> | miR-6828-5p         | 1 |
| <i>circCCSER1</i> | miR-6830-3p         | 1 |
| <i>circCCSER1</i> | miR-6832-3p         | 3 |
| <i>circCCSER1</i> | miR-6833-5p         | 1 |
| <i>circCCSER1</i> | miR-6834-5p         | 1 |
| <i>circCCSER1</i> | miR-6837-3p         | 2 |
| <i>circCCSER1</i> | miR-6840-3p         | 1 |
| <i>circCCSER1</i> | miR-6841-5p         | 1 |
| <i>circCCSER1</i> | miR-6843-3p/6848-3p | 2 |
| <i>circCCSER1</i> | miR-6844            | 5 |
| <i>circCCSER1</i> | miR-6847-3p         | 1 |
| <i>circCCSER1</i> | miR-6847-5p         | 1 |
| <i>circCCSER1</i> | miR-6853-3p         | 3 |
| <i>circCCSER1</i> | miR-6857-3p         | 1 |
| <i>circCCSER1</i> | miR-6857-5p         | 1 |
| <i>circCCSER1</i> | miR-6864-5p         | 1 |
| <i>circCCSER1</i> | miR-6868-3p         | 2 |
| <i>circCCSER1</i> | miR-6868-5p         | 1 |
| <i>circCCSER1</i> | miR-6871-3p         | 1 |
| <i>circCCSER1</i> | miR-6872-3p         | 1 |
| <i>circCCSER1</i> | miR-6873-3p         | 2 |

|                   |             |   |
|-------------------|-------------|---|
| <i>circCCSER1</i> | miR-6875-3p | 5 |
| <i>circCCSER1</i> | miR-6878-5p | 1 |
| <i>circCCSER1</i> | miR-6880-5p | 1 |
| <i>circCCSER1</i> | miR-6881-3p | 2 |
| <i>circCCSER1</i> | miR-6885-3p | 4 |
| <i>circCCSER1</i> | miR-6888-3p | 1 |
| <i>circCCSER1</i> | miR-6888-5p | 3 |
| <i>circCCSER1</i> | miR-6889-3p | 1 |
| <i>circCCSER1</i> | miR-6892-3p | 1 |
| <i>circCCSER1</i> | miR-7-5p    | 2 |
| <i>circCCSER1</i> | miR-7108-5p | 1 |
| <i>circCCSER1</i> | miR-7110-3p | 4 |
| <i>circCCSER1</i> | miR-7111-3p | 2 |
| <i>circCCSER1</i> | miR-7113-3p | 1 |
| <i>circCCSER1</i> | miR-7113-5p | 1 |
| <i>circCCSER1</i> | miR-7114-5p | 2 |
| <i>circCCSER1</i> | miR-7150    | 2 |
| <i>circCCSER1</i> | miR-7151-5p | 3 |
| <i>circCCSER1</i> | miR-7152-3p | 1 |
| <i>circCCSER1</i> | miR-7152-5p | 1 |
| <i>circCCSER1</i> | miR-7158-3p | 1 |
| <i>circCCSER1</i> | miR-7159-3p | 2 |
| <i>circCCSER1</i> | miR-7161-3p | 1 |
| <i>circCCSER1</i> | miR-718     | 2 |
| <i>circCCSER1</i> | miR-744-3p  | 1 |
| <i>circCCSER1</i> | miR-758-5p  | 1 |
| <i>circCCSER1</i> | miR-760     | 2 |
| <i>circCCSER1</i> | miR-764     | 1 |
| <i>circCCSER1</i> | miR-767-3p  | 3 |
| <i>circCCSER1</i> | miR-767-5p  | 1 |
| <i>circCCSER1</i> | miR-769-5p  | 1 |
| <i>circCCSER1</i> | miR-770-5p  | 1 |
| <i>circCCSER1</i> | miR-7702    | 1 |
| <i>circCCSER1</i> | miR-7703    | 1 |
| <i>circCCSER1</i> | miR-7844-5p | 2 |
| <i>circCCSER1</i> | miR-7845-5p | 1 |
| <i>circCCSER1</i> | miR-7849-3p | 1 |
| <i>circCCSER1</i> | miR-7973    | 1 |

|                   |                       |   |
|-------------------|-----------------------|---|
| <i>circCCSER1</i> | miR-7977              | 1 |
| <i>circCCSER1</i> | miR-8057              | 2 |
| <i>circCCSER1</i> | miR-8063              | 2 |
| <i>circCCSER1</i> | miR-8068              | 1 |
| <i>circCCSER1</i> | miR-8070              | 2 |
| <i>circCCSER1</i> | miR-8071              | 1 |
| <i>circCCSER1</i> | miR-8081              | 2 |
| <i>circCCSER1</i> | miR-8084              | 2 |
| <i>circCCSER1</i> | miR-873-3p            | 1 |
| <i>circCCSER1</i> | miR-873-5p.2          | 2 |
| <i>circCCSER1</i> | miR-876-5p            | 2 |
| <i>circCCSER1</i> | miR-887-5p            | 1 |
| <i>circCCSER1</i> | miR-889-3p            | 1 |
| <i>circCCSER1</i> | miR-892-5p            | 2 |
| <i>circCCSER1</i> | miR-892a              | 3 |
| <i>circCCSER1</i> | miR-892b              | 2 |
| <i>circCCSER1</i> | miR-9-5p              | 2 |
| <i>circCCSER1</i> | miR-921               | 1 |
| <i>circCCSER1</i> | miR-922               | 4 |
| <i>circCCSER1</i> | miR-92a-1-5p          | 1 |
| <i>circCCSER1</i> | miR-93-3p             | 1 |
| <i>circCCSER1</i> | miR-937-5p            | 1 |
| <i>circCCSER1</i> | miR-939-5p/1343-5p    | 1 |
| <i>circCCSER1</i> | miR-942-5p            | 2 |
| <i>circCCSER1</i> | miR-943               | 1 |
| <i>circCCSER1</i> | miR-9500              | 1 |
| <i>circCCSER1</i> | miR-96-3p             | 1 |
| <i>circCCSER1</i> | miR-96-5p/1271-5p     | 3 |
| <i>circCCSER1</i> | miR-99-3p             | 1 |
| <i>circCCSER1</i> | let-7a-2-3p/let-7g-3p | 1 |
| <i>circCCSER1</i> | let-7c-3p             | 1 |
| <i>circCCSER1</i> | miR-101-3p.2          | 1 |
| <i>circCCSER1</i> | miR-1236-3p           | 2 |
| <i>circCCSER1</i> | miR-124-3p.1          | 1 |
| <i>circCCSER1</i> | miR-1273e             | 1 |
| <i>circCCSER1</i> | miR-1468-3p           | 1 |
| <i>circCCSER1</i> | miR-147a              | 1 |
| <i>circCCSER1</i> | miR-155-5p            | 1 |

|                   |                                      |   |
|-------------------|--------------------------------------|---|
| <i>circCCSER1</i> | miR-222-5p                           | 1 |
| <i>circCCSER1</i> | miR-3121-5p                          | 1 |
| <i>circCCSER1</i> | miR-3169                             | 1 |
| <i>circCCSER1</i> | miR-3177-5p                          | 1 |
| <i>circCCSER1</i> | miR-362-5p/500b-5p                   | 1 |
| <i>circCCSER1</i> | miR-3622a-5p                         | 1 |
| <i>circCCSER1</i> | miR-3622b-5p                         | 1 |
| <i>circCCSER1</i> | miR-3688-5p                          | 1 |
| <i>circCCSER1</i> | miR-3714                             | 1 |
| <i>circCCSER1</i> | miR-374-5p                           | 2 |
| <i>circCCSER1</i> | miR-3910                             | 1 |
| <i>circCCSER1</i> | miR-410-3p                           | 1 |
| <i>circCCSER1</i> | miR-4635                             | 1 |
| <i>circCCSER1</i> | miR-4637                             | 1 |
| <i>circCCSER1</i> | miR-4642                             | 1 |
| <i>circCCSER1</i> | miR-466                              | 1 |
| <i>circCCSER1</i> | miR-4728-3p                          | 1 |
| <i>circCCSER1</i> | miR-4751                             | 1 |
| <i>circCCSER1</i> | miR-4759                             | 1 |
| <i>circCCSER1</i> | miR-4795-5p                          | 1 |
| <i>circCCSER1</i> | miR-487a-5p/487b-5p                  | 1 |
| <i>circCCSER1</i> | miR-488-3p                           | 1 |
| <i>circCCSER1</i> | miR-493-5p                           | 1 |
| <i>circCCSER1</i> | miR-5004-5p                          | 1 |
| <i>circCCSER1</i> | miR-501-5p                           | 1 |
| <i>circCCSER1</i> | miR-511-3p                           | 2 |
| <i>circCCSER1</i> | miR-518a-5p/527                      | 1 |
| <i>circCCSER1</i> | miR-545-5p                           | 1 |
| <i>circCCSER1</i> | miR-548aj-5p/548f-5p/548g-5p/548x-5p | 1 |
| <i>circCCSER1</i> | miR-548aw                            | 1 |
| <i>circCCSER1</i> | miR-5582-5p                          | 1 |
| <i>circCCSER1</i> | miR-5681a                            | 1 |
| <i>circCCSER1</i> | miR-580-5p                           | 1 |
| <i>circCCSER1</i> | miR-582-5p                           | 1 |
| <i>circCCSER1</i> | miR-591                              | 1 |
| <i>circCCSER1</i> | miR-597-5p                           | 1 |
| <i>circCCSER1</i> | miR-6074                             | 1 |
| <i>circCCSER1</i> | miR-628-5p                           | 1 |

|                   |                                       |   |
|-------------------|---------------------------------------|---|
| <i>circCCSER1</i> | miR-6503-3p                           | 1 |
| <i>circCCSER1</i> | miR-6515-3p                           | 2 |
| <i>circCCSER1</i> | miR-659-3p                            | 1 |
| <i>circCCSER1</i> | miR-6730-5p                           | 1 |
| <i>circCCSER1</i> | miR-6818-5p                           | 1 |
| <i>circCCSER1</i> | miR-6831-3p                           | 1 |
| <i>circCCSER1</i> | miR-6867-5p                           | 1 |
| <i>circCCSER1</i> | miR-802                               | 1 |
| <i>circCCSER1</i> | miR-8083                              | 1 |
| <i>circCCSER1</i> | miR-873-5p.1                          | 1 |
| <i>circCCSER1</i> | miR-891a-3p                           | 1 |
| <i>circCCSER1</i> | miR-942-3p                            | 1 |
| <i>circCDC14B</i> | let-7a-2-3p/let-7g-3p                 | 4 |
| <i>circCDC14B</i> | let-7a-3p/let-7b-3p/let-7f-1-3p/98-3p | 1 |
| <i>circCDC14B</i> | let-7c-3p                             | 4 |
| <i>circCDC14B</i> | let-7f-2-3p/1185-3p                   | 1 |
| <i>circCDC14B</i> | miR-100-3p                            | 1 |
| <i>circCDC14B</i> | miR-101-3p.1                          | 2 |
| <i>circCDC14B</i> | miR-101-3p.2                          | 1 |
| <i>circCDC14B</i> | miR-101-5p                            | 2 |
| <i>circCDC14B</i> | miR-103-3p/107                        | 4 |
| <i>circCDC14B</i> | miR-103a-2-5p                         | 1 |
| <i>circCDC14B</i> | miR-103b                              | 2 |
| <i>circCDC14B</i> | miR-105-3p                            | 4 |
| <i>circCDC14B</i> | miR-105-5p                            | 4 |
| <i>circCDC14B</i> | miR-106a-3p                           | 1 |
| <i>circCDC14B</i> | miR-1179                              | 1 |
| <i>circCDC14B</i> | miR-1184                              | 3 |
| <i>circCDC14B</i> | miR-1199-5p/6751-3p                   | 1 |
| <i>circCDC14B</i> | miR-1200                              | 2 |
| <i>circCDC14B</i> | miR-1205                              | 3 |
| <i>circCDC14B</i> | miR-1206                              | 2 |
| <i>circCDC14B</i> | miR-1207-5p/4763-3p                   | 1 |
| <i>circCDC14B</i> | miR-1208                              | 1 |
| <i>circCDC14B</i> | miR-122-5p                            | 1 |
| <i>circCDC14B</i> | miR-1226-3p                           | 1 |
| <i>circCDC14B</i> | miR-1226-5p                           | 2 |
| <i>circCDC14B</i> | miR-1227-3p                           | 1 |



|                   |                          |   |
|-------------------|--------------------------|---|
| <i>circCDC14B</i> | miR-1229-3p              | 1 |
| <i>circCDC14B</i> | miR-1231                 | 1 |
| <i>circCDC14B</i> | miR-1236-3p              | 4 |
| <i>circCDC14B</i> | miR-1236-5p              | 1 |
| <i>circCDC14B</i> | miR-1237-3p              | 4 |
| <i>circCDC14B</i> | miR-1238-3p              | 3 |
| <i>circCDC14B</i> | miR-124-5p               | 1 |
| <i>circCDC14B</i> | miR-1245a/8079           | 1 |
| <i>circCDC14B</i> | miR-1248                 | 4 |
| <i>circCDC14B</i> | miR-125-5p               | 1 |
| <i>circCDC14B</i> | miR-1250-3p              | 2 |
| <i>circCDC14B</i> | miR-1252-3p              | 2 |
| <i>circCDC14B</i> | miR-1253                 | 2 |
| <i>circCDC14B</i> | miR-1255a/1255b-5p       | 1 |
| <i>circCDC14B</i> | miR-1255b-2-3p           | 2 |
| <i>circCDC14B</i> | miR-1256                 | 1 |
| <i>circCDC14B</i> | miR-126-5p               | 5 |
| <i>circCDC14B</i> | miR-1261                 | 1 |
| <i>circCDC14B</i> | miR-1263                 | 1 |
| <i>circCDC14B</i> | miR-1264                 | 2 |
| <i>circCDC14B</i> | miR-1265                 | 3 |
| <i>circCDC14B</i> | miR-1269                 | 1 |
| <i>circCDC14B</i> | miR-127-5p               | 2 |
| <i>circCDC14B</i> | miR-1270                 | 3 |
| <i>circCDC14B</i> | miR-1272                 | 3 |
| <i>circCDC14B</i> | miR-1273g-5p             | 2 |
| <i>circCDC14B</i> | miR-1273h-3p             | 2 |
| <i>circCDC14B</i> | miR-1276                 | 3 |
| <i>circCDC14B</i> | miR-1279                 | 1 |
| <i>circCDC14B</i> | miR-128-3p               | 1 |
| <i>circCDC14B</i> | miR-1286                 | 1 |
| <i>circCDC14B</i> | miR-1287-5p              | 1 |
| <i>circCDC14B</i> | miR-1288-5p              | 1 |
| <i>circCDC14B</i> | miR-129-5p               | 1 |
| <i>circCDC14B</i> | miR-1295b-3p             | 1 |
| <i>circCDC14B</i> | miR-1298-3p              | 3 |
| <i>circCDC14B</i> | miR-1298-5p              | 1 |
| <i>circCDC14B</i> | miR-130-3p/301-3p/454-3p | 4 |

|                   |                                      |   |
|-------------------|--------------------------------------|---|
| <i>circCDC14B</i> | miR-1301-3p                          | 1 |
| <i>circCDC14B</i> | miR-1304-3p                          | 1 |
| <i>circCDC14B</i> | miR-1304-5p                          | 1 |
| <i>circCDC14B</i> | miR-1305                             | 3 |
| <i>circCDC14B</i> | miR-132-3p/212-3p                    | 2 |
| <i>circCDC14B</i> | miR-1322                             | 3 |
| <i>circCDC14B</i> | miR-1323                             | 2 |
| <i>circCDC14B</i> | miR-133a-3p.2/133b                   | 1 |
| <i>circCDC14B</i> | miR-134-5p                           | 1 |
| <i>circCDC14B</i> | miR-135-5p                           | 3 |
| <i>circCDC14B</i> | miR-137                              | 1 |
| <i>circCDC14B</i> | miR-138-2-3p                         | 1 |
| <i>circCDC14B</i> | miR-139-3p                           | 1 |
| <i>circCDC14B</i> | miR-139-5p                           | 2 |
| <i>circCDC14B</i> | miR-140-5p                           | 2 |
| <i>circCDC14B</i> | miR-141-3p/200-3p                    | 2 |
| <i>circCDC14B</i> | miR-141-5p                           | 4 |
| <i>circCDC14B</i> | miR-142-3p.1                         | 1 |
| <i>circCDC14B</i> | miR-142-3p.2                         | 1 |
| <i>circCDC14B</i> | miR-142-5p                           | 1 |
| <i>circCDC14B</i> | miR-143-5p                           | 6 |
| <i>circCDC14B</i> | miR-144-3p                           | 2 |
| <i>circCDC14B</i> | miR-144-5p                           | 1 |
| <i>circCDC14B</i> | miR-145-5p                           | 1 |
| <i>circCDC14B</i> | miR-146-5p                           | 2 |
| <i>circCDC14B</i> | miR-1468-3p                          | 2 |
| <i>circCDC14B</i> | miR-146a-3p                          | 1 |
| <i>circCDC14B</i> | miR-148-3p/152-3p                    | 1 |
| <i>circCDC14B</i> | miR-148a-5p                          | 1 |
| <i>circCDC14B</i> | miR-149-5p                           | 6 |
| <i>circCDC14B</i> | miR-15-5p/16-5p/195-5p/424-5p/497-5p | 4 |
| <i>circCDC14B</i> | miR-150-3p                           | 1 |
| <i>circCDC14B</i> | miR-151-3p                           | 1 |
| <i>circCDC14B</i> | miR-152-5p                           | 1 |
| <i>circCDC14B</i> | miR-153-5p                           | 4 |
| <i>circCDC14B</i> | miR-1537-5p                          | 1 |
| <i>circCDC14B</i> | miR-154-5p                           | 2 |
| <i>circCDC14B</i> | miR-15b-3p                           | 3 |

|                   |                                     |   |
|-------------------|-------------------------------------|---|
| <i>circCDC14B</i> | miR-16-1-3p                         | 2 |
| <i>circCDC14B</i> | miR-16-2-3p/195-3p                  | 2 |
| <i>circCDC14B</i> | miR-17-3p                           | 3 |
| <i>circCDC14B</i> | miR-17-5p/20-5p/93-5p/106-5p/519-3p | 1 |
| <i>circCDC14B</i> | miR-18-5p                           | 1 |
| <i>circCDC14B</i> | miR-181-3p/4420                     | 2 |
| <i>circCDC14B</i> | miR-181-5p                          | 4 |
| <i>circCDC14B</i> | miR-181d-3p                         | 1 |
| <i>circCDC14B</i> | miR-182-3p                          | 1 |
| <i>circCDC14B</i> | miR-1825                            | 1 |
| <i>circCDC14B</i> | miR-183-5p.1                        | 2 |
| <i>circCDC14B</i> | miR-185-3p                          | 3 |
| <i>circCDC14B</i> | miR-185-5p                          | 2 |
| <i>circCDC14B</i> | miR-186-5p                          | 7 |
| <i>circCDC14B</i> | miR-187-3p                          | 1 |
| <i>circCDC14B</i> | miR-19-5p                           | 2 |
| <i>circCDC14B</i> | miR-1908-5p                         | 1 |
| <i>circCDC14B</i> | miR-1909-5p                         | 2 |
| <i>circCDC14B</i> | miR-190a-3p                         | 4 |
| <i>circCDC14B</i> | miR-1910-5p                         | 1 |
| <i>circCDC14B</i> | miR-1915-5p                         | 1 |
| <i>circCDC14B</i> | miR-192-3p                          | 2 |
| <i>circCDC14B</i> | miR-192-5p/215-5p                   | 1 |
| <i>circCDC14B</i> | miR-193-3p                          | 2 |
| <i>circCDC14B</i> | miR-194-3p                          | 2 |
| <i>circCDC14B</i> | miR-196b-3p                         | 1 |
| <i>circCDC14B</i> | miR-197-3p                          | 2 |
| <i>circCDC14B</i> | miR-1976                            | 2 |
| <i>circCDC14B</i> | miR-199-3p                          | 1 |
| <i>circCDC14B</i> | miR-199-5p                          | 1 |
| <i>circCDC14B</i> | miR-202-3p                          | 1 |
| <i>circCDC14B</i> | miR-202-5p                          | 2 |
| <i>circCDC14B</i> | miR-203a-3p.1                       | 1 |
| <i>circCDC14B</i> | miR-203a-5p                         | 2 |
| <i>circCDC14B</i> | miR-203b-3p                         | 3 |
| <i>circCDC14B</i> | miR-203b-5p/6718-5p                 | 2 |
| <i>circCDC14B</i> | miR-204-3p/4646-5p                  | 1 |
| <i>circCDC14B</i> | miR-205-3p                          | 6 |

|                   |                                     |   |
|-------------------|-------------------------------------|---|
| <i>circCDC14B</i> | miR-2052                            | 2 |
| <i>circCDC14B</i> | miR-2053                            | 3 |
| <i>circCDC14B</i> | miR-208-5p                          | 2 |
| <i>circCDC14B</i> | miR-2110                            | 2 |
| <i>circCDC14B</i> | miR-2113                            | 2 |
| <i>circCDC14B</i> | miR-2115-3p                         | 2 |
| <i>circCDC14B</i> | miR-2115-5p                         | 2 |
| <i>circCDC14B</i> | miR-2116-5p                         | 2 |
| <i>circCDC14B</i> | miR-212-5p                          | 1 |
| <i>circCDC14B</i> | miR-214-3p/3619-5p                  | 4 |
| <i>circCDC14B</i> | miR-217                             | 1 |
| <i>circCDC14B</i> | miR-218-1-3p                        | 1 |
| <i>circCDC14B</i> | miR-218-2-3p                        | 1 |
| <i>circCDC14B</i> | miR-218-5p                          | 1 |
| <i>circCDC14B</i> | miR-219-5p                          | 1 |
| <i>circCDC14B</i> | miR-22-3p                           | 2 |
| <i>circCDC14B</i> | miR-22-5p                           | 2 |
| <i>circCDC14B</i> | miR-221-3p/222-3p                   | 4 |
| <i>circCDC14B</i> | miR-221-5p/8073                     | 1 |
| <i>circCDC14B</i> | miR-223-5p                          | 2 |
| <i>circCDC14B</i> | miR-2277-3p                         | 1 |
| <i>circCDC14B</i> | miR-2278                            | 1 |
| <i>circCDC14B</i> | miR-23-3p                           | 1 |
| <i>circCDC14B</i> | miR-2392                            | 2 |
| <i>circCDC14B</i> | miR-24-3p                           | 1 |
| <i>circCDC14B</i> | miR-24-5p                           | 1 |
| <i>circCDC14B</i> | miR-2467-5p                         | 1 |
| <i>circCDC14B</i> | miR-25-3p/32-5p/92-3p/363-3p/367-3p | 3 |
| <i>circCDC14B</i> | miR-26-3p                           | 2 |
| <i>circCDC14B</i> | miR-2681-3p                         | 2 |
| <i>circCDC14B</i> | miR-2681-5p                         | 2 |
| <i>circCDC14B</i> | miR-2861                            | 2 |
| <i>circCDC14B</i> | miR-29-3p                           | 2 |
| <i>circCDC14B</i> | miR-297                             | 2 |
| <i>circCDC14B</i> | miR-298                             | 3 |
| <i>circCDC14B</i> | miR-299-5p                          | 2 |
| <i>circCDC14B</i> | miR-29a-5p                          | 2 |
| <i>circCDC14B</i> | miR-29b-1-5p                        | 1 |

|                   |                                 |   |
|-------------------|---------------------------------|---|
| <i>circCDC14B</i> | miR-29b-2-5p                    | 4 |
| <i>circCDC14B</i> | miR-29c-5p                      | 1 |
| <i>circCDC14B</i> | miR-30-3p                       | 5 |
| <i>circCDC14B</i> | miR-301a-5p/301b-5p             | 4 |
| <i>circCDC14B</i> | miR-302-3p/372-3p/373-3p/520-3p | 1 |
| <i>circCDC14B</i> | miR-302b-5p/302d-5p             | 1 |
| <i>circCDC14B</i> | miR-302c-5p                     | 1 |
| <i>circCDC14B</i> | miR-3064-3p                     | 1 |
| <i>circCDC14B</i> | miR-3065-3p                     | 2 |
| <i>circCDC14B</i> | miR-3119                        | 1 |
| <i>circCDC14B</i> | miR-3120-3p                     | 3 |
| <i>circCDC14B</i> | miR-3120-5p                     | 1 |
| <i>circCDC14B</i> | miR-3121-5p                     | 1 |
| <i>circCDC14B</i> | miR-3123                        | 2 |
| <i>circCDC14B</i> | miR-3126-3p                     | 3 |
| <i>circCDC14B</i> | miR-3128                        | 3 |
| <i>circCDC14B</i> | miR-3130-3p                     | 1 |
| <i>circCDC14B</i> | miR-3133                        | 7 |
| <i>circCDC14B</i> | miR-3135b                       | 1 |
| <i>circCDC14B</i> | miR-3136-3p/7155-3p             | 1 |
| <i>circCDC14B</i> | miR-3136-5p/4439                | 1 |
| <i>circCDC14B</i> | miR-3138                        | 1 |
| <i>circCDC14B</i> | miR-3140-3p                     | 2 |
| <i>circCDC14B</i> | miR-3143                        | 1 |
| <i>circCDC14B</i> | miR-3144-5p                     | 1 |
| <i>circCDC14B</i> | miR-3145-3p                     | 2 |
| <i>circCDC14B</i> | miR-3146                        | 2 |
| <i>circCDC14B</i> | miR-3148                        | 1 |
| <i>circCDC14B</i> | miR-3150a-3p                    | 2 |
| <i>circCDC14B</i> | miR-3150a-5p/3150b-5p           | 1 |
| <i>circCDC14B</i> | miR-3151-3p                     | 2 |
| <i>circCDC14B</i> | miR-3152-3p                     | 1 |
| <i>circCDC14B</i> | miR-3152-5p                     | 1 |
| <i>circCDC14B</i> | miR-3154                        | 2 |
| <i>circCDC14B</i> | miR-3156-5p                     | 5 |
| <i>circCDC14B</i> | miR-3158-5p                     | 3 |
| <i>circCDC14B</i> | miR-3160-3p                     | 2 |
| <i>circCDC14B</i> | miR-3162-3p                     | 2 |

|                   |                           |   |
|-------------------|---------------------------|---|
| <i>circCDC14B</i> | miR-3163                  | 4 |
| <i>circCDC14B</i> | miR-3164                  | 1 |
| <i>circCDC14B</i> | miR-3165                  | 1 |
| <i>circCDC14B</i> | miR-3166                  | 2 |
| <i>circCDC14B</i> | miR-3170/6855-5p          | 1 |
| <i>circCDC14B</i> | miR-3171                  | 3 |
| <i>circCDC14B</i> | miR-3175                  | 2 |
| <i>circCDC14B</i> | miR-3176/3922-3p          | 1 |
| <i>circCDC14B</i> | miR-3177-3p               | 1 |
| <i>circCDC14B</i> | miR-3179                  | 1 |
| <i>circCDC14B</i> | miR-3181                  | 1 |
| <i>circCDC14B</i> | miR-3182                  | 3 |
| <i>circCDC14B</i> | miR-3183/4723-3p/6769b-3p | 2 |
| <i>circCDC14B</i> | miR-3184-3p               | 2 |
| <i>circCDC14B</i> | miR-3185                  | 5 |
| <i>circCDC14B</i> | miR-3188                  | 1 |
| <i>circCDC14B</i> | miR-3189-3p               | 1 |
| <i>circCDC14B</i> | miR-3190-3p               | 1 |
| <i>circCDC14B</i> | miR-3190-5p               | 1 |
| <i>circCDC14B</i> | miR-3191-3p               | 1 |
| <i>circCDC14B</i> | miR-3191-5p               | 2 |
| <i>circCDC14B</i> | miR-3192-3p               | 3 |
| <i>circCDC14B</i> | miR-3192-5p               | 1 |
| <i>circCDC14B</i> | miR-3193                  | 1 |
| <i>circCDC14B</i> | miR-3194-3p               | 3 |
| <i>circCDC14B</i> | miR-3198/4309             | 1 |
| <i>circCDC14B</i> | miR-3199/8052             | 1 |
| <i>circCDC14B</i> | miR-32-3p                 | 1 |
| <i>circCDC14B</i> | miR-3200-3p               | 2 |
| <i>circCDC14B</i> | miR-3200-5p               | 1 |
| <i>circCDC14B</i> | miR-3202                  | 1 |
| <i>circCDC14B</i> | miR-320e                  | 1 |
| <i>circCDC14B</i> | miR-323-3p                | 3 |
| <i>circCDC14B</i> | miR-326                   | 3 |
| <i>circCDC14B</i> | miR-330-3p.2              | 3 |
| <i>circCDC14B</i> | miR-331-3p                | 1 |
| <i>circCDC14B</i> | miR-335-3p                | 3 |
| <i>circCDC14B</i> | miR-335-5p                | 2 |

|                   |                     |   |
|-------------------|---------------------|---|
| <i>circCDC14B</i> | miR-337-3p          | 2 |
| <i>circCDC14B</i> | miR-33a-3p          | 4 |
| <i>circCDC14B</i> | miR-34-5p/449-5p    | 1 |
| <i>circCDC14B</i> | miR-345-5p          | 1 |
| <i>circCDC14B</i> | miR-34a-3p          | 1 |
| <i>circCDC14B</i> | miR-3529-3p         | 2 |
| <i>circCDC14B</i> | miR-3607-3p         | 1 |
| <i>circCDC14B</i> | miR-361-3p          | 1 |
| <i>circCDC14B</i> | miR-3611            | 1 |
| <i>circCDC14B</i> | miR-3614-3p         | 2 |
| <i>circCDC14B</i> | miR-3614-5p         | 1 |
| <i>circCDC14B</i> | miR-3617-3p         | 1 |
| <i>circCDC14B</i> | miR-3619-3p         | 2 |
| <i>circCDC14B</i> | miR-3621            | 1 |
| <i>circCDC14B</i> | miR-3646            | 2 |
| <i>circCDC14B</i> | miR-365-3p          | 1 |
| <i>circCDC14B</i> | miR-3650            | 1 |
| <i>circCDC14B</i> | miR-3651            | 2 |
| <i>circCDC14B</i> | miR-3652/4430       | 1 |
| <i>circCDC14B</i> | miR-3653-3p         | 5 |
| <i>circCDC14B</i> | miR-3653-5p         | 2 |
| <i>circCDC14B</i> | miR-3655            | 1 |
| <i>circCDC14B</i> | miR-3656            | 1 |
| <i>circCDC14B</i> | miR-3657            | 1 |
| <i>circCDC14B</i> | miR-3658            | 4 |
| <i>circCDC14B</i> | miR-365a-5p/365b-5p | 1 |
| <i>circCDC14B</i> | miR-3660/4526       | 1 |
| <i>circCDC14B</i> | miR-3662            | 4 |
| <i>circCDC14B</i> | miR-3664-5p         | 2 |
| <i>circCDC14B</i> | miR-3667-3p         | 2 |
| <i>circCDC14B</i> | miR-3667-5p         | 2 |
| <i>circCDC14B</i> | miR-3671            | 2 |
| <i>circCDC14B</i> | miR-3672/6864-3p    | 2 |
| <i>circCDC14B</i> | miR-3675-3p         | 1 |
| <i>circCDC14B</i> | miR-3675-5p         | 1 |
| <i>circCDC14B</i> | miR-3677-5p         | 1 |
| <i>circCDC14B</i> | miR-3678-3p         | 2 |
| <i>circCDC14B</i> | miR-3680-3p         | 1 |

|                   |                                   |   |
|-------------------|-----------------------------------|---|
| <i>circCDC14B</i> | miR-3682-3p                       | 1 |
| <i>circCDC14B</i> | miR-3685                          | 2 |
| <i>circCDC14B</i> | miR-3686                          | 1 |
| <i>circCDC14B</i> | miR-3688-3p                       | 1 |
| <i>circCDC14B</i> | miR-3688-5p                       | 1 |
| <i>circCDC14B</i> | miR-3689a-5p/3689b-5p/3689e/3689f | 1 |
| <i>circCDC14B</i> | miR-369-3p                        | 1 |
| <i>circCDC14B</i> | miR-3691-3p                       | 1 |
| <i>circCDC14B</i> | miR-3691-5p                       | 1 |
| <i>circCDC14B</i> | miR-370-3p                        | 2 |
| <i>circCDC14B</i> | miR-374-5p/655-3p                 | 1 |
| <i>circCDC14B</i> | miR-375                           | 2 |
| <i>circCDC14B</i> | miR-376b-5p/376c-5p               | 1 |
| <i>circCDC14B</i> | miR-376c-3p                       | 2 |
| <i>circCDC14B</i> | miR-378a-5p                       | 2 |
| <i>circCDC14B</i> | miR-382-5p                        | 1 |
| <i>circCDC14B</i> | miR-383-3p                        | 2 |
| <i>circCDC14B</i> | miR-383-5p.1                      | 3 |
| <i>circCDC14B</i> | miR-383-5p.2                      | 3 |
| <i>circCDC14B</i> | miR-384                           | 2 |
| <i>circCDC14B</i> | miR-3908                          | 1 |
| <i>circCDC14B</i> | miR-3913-3p                       | 2 |
| <i>circCDC14B</i> | miR-3919                          | 2 |
| <i>circCDC14B</i> | miR-3920                          | 1 |
| <i>circCDC14B</i> | miR-3921/4653-5p                  | 4 |
| <i>circCDC14B</i> | miR-3925-5p                       | 2 |
| <i>circCDC14B</i> | miR-3928-5p/6806-3p               | 1 |
| <i>circCDC14B</i> | miR-3929/4419b/4478               | 1 |
| <i>circCDC14B</i> | miR-3936                          | 2 |
| <i>circCDC14B</i> | miR-3942-3p                       | 4 |
| <i>circCDC14B</i> | miR-3942-5p                       | 1 |
| <i>circCDC14B</i> | miR-3944-3p                       | 1 |
| <i>circCDC14B</i> | miR-3944-5p                       | 2 |
| <i>circCDC14B</i> | miR-3975                          | 1 |
| <i>circCDC14B</i> | miR-3977                          | 2 |
| <i>circCDC14B</i> | miR-409-3p                        | 1 |
| <i>circCDC14B</i> | miR-409-5p                        | 1 |
| <i>circCDC14B</i> | miR-412-5p                        | 1 |



|                   |                           |   |
|-------------------|---------------------------|---|
| <i>circCDC14B</i> | miR-423-3p                | 1 |
| <i>circCDC14B</i> | miR-423-5p                | 1 |
| <i>circCDC14B</i> | miR-425-5p                | 1 |
| <i>circCDC14B</i> | miR-4251                  | 3 |
| <i>circCDC14B</i> | miR-4255                  | 3 |
| <i>circCDC14B</i> | miR-4258                  | 1 |
| <i>circCDC14B</i> | miR-4259                  | 1 |
| <i>circCDC14B</i> | miR-4260                  | 2 |
| <i>circCDC14B</i> | miR-4267                  | 1 |
| <i>circCDC14B</i> | miR-4269/6715b-5p         | 1 |
| <i>circCDC14B</i> | miR-4271/4725-3p/6780b-5p | 1 |
| <i>circCDC14B</i> | miR-4272                  | 3 |
| <i>circCDC14B</i> | miR-4274                  | 2 |
| <i>circCDC14B</i> | miR-4279                  | 3 |
| <i>circCDC14B</i> | miR-4282                  | 4 |
| <i>circCDC14B</i> | miR-4284                  | 1 |
| <i>circCDC14B</i> | miR-4286                  | 1 |
| <i>circCDC14B</i> | miR-4289                  | 1 |
| <i>circCDC14B</i> | miR-4291                  | 5 |
| <i>circCDC14B</i> | miR-4293                  | 1 |
| <i>circCDC14B</i> | miR-4297/5581-5p          | 4 |
| <i>circCDC14B</i> | miR-4299                  | 1 |
| <i>circCDC14B</i> | miR-4301                  | 1 |
| <i>circCDC14B</i> | miR-4302                  | 2 |
| <i>circCDC14B</i> | miR-4303                  | 1 |
| <i>circCDC14B</i> | miR-4307                  | 1 |
| <i>circCDC14B</i> | miR-431-5p                | 1 |
| <i>circCDC14B</i> | miR-4310/7157-5p          | 4 |
| <i>circCDC14B</i> | miR-4311                  | 3 |
| <i>circCDC14B</i> | miR-4312                  | 3 |
| <i>circCDC14B</i> | miR-4314                  | 1 |
| <i>circCDC14B</i> | miR-4315                  | 2 |
| <i>circCDC14B</i> | miR-4317                  | 4 |
| <i>circCDC14B</i> | miR-4318                  | 1 |
| <i>circCDC14B</i> | miR-432-3p                | 2 |
| <i>circCDC14B</i> | miR-432-5p                | 3 |
| <i>circCDC14B</i> | miR-4324                  | 2 |
| <i>circCDC14B</i> | miR-4325                  | 1 |

|                   |                     |   |
|-------------------|---------------------|---|
| <i>circCDC14B</i> | miR-4326            | 1 |
| <i>circCDC14B</i> | miR-4328            | 1 |
| <i>circCDC14B</i> | miR-4329            | 3 |
| <i>circCDC14B</i> | miR-433-3p          | 1 |
| <i>circCDC14B</i> | miR-4330            | 2 |
| <i>circCDC14B</i> | miR-4422            | 3 |
| <i>circCDC14B</i> | miR-4423-3p         | 1 |
| <i>circCDC14B</i> | miR-4426/4647/4662b | 2 |
| <i>circCDC14B</i> | miR-4427            | 2 |
| <i>circCDC14B</i> | miR-4433a-3p        | 1 |
| <i>circCDC14B</i> | miR-4433b-5p        | 1 |
| <i>circCDC14B</i> | miR-4434/4516/5703  | 3 |
| <i>circCDC14B</i> | miR-4445-5p         | 1 |
| <i>circCDC14B</i> | miR-4455            | 1 |
| <i>circCDC14B</i> | miR-4456            | 1 |
| <i>circCDC14B</i> | miR-4457            | 1 |
| <i>circCDC14B</i> | miR-4459            | 1 |
| <i>circCDC14B</i> | miR-4461            | 1 |
| <i>circCDC14B</i> | miR-4468            | 1 |
| <i>circCDC14B</i> | miR-4470            | 1 |
| <i>circCDC14B</i> | miR-4476/6876-5p    | 2 |
| <i>circCDC14B</i> | miR-4477a           | 2 |
| <i>circCDC14B</i> | miR-4477b           | 2 |
| <i>circCDC14B</i> | miR-4487            | 2 |
| <i>circCDC14B</i> | miR-4490            | 1 |
| <i>circCDC14B</i> | miR-4493            | 1 |
| <i>circCDC14B</i> | miR-4494            | 1 |
| <i>circCDC14B</i> | miR-4496            | 1 |
| <i>circCDC14B</i> | miR-450-5p          | 2 |
| <i>circCDC14B</i> | miR-4502            | 1 |
| <i>circCDC14B</i> | miR-4504            | 1 |
| <i>circCDC14B</i> | miR-4505/5787       | 1 |
| <i>circCDC14B</i> | miR-4506            | 1 |
| <i>circCDC14B</i> | miR-450a-2-3p       | 2 |
| <i>circCDC14B</i> | miR-450b-3p/769-3p  | 1 |
| <i>circCDC14B</i> | miR-450b-5p         | 1 |
| <i>circCDC14B</i> | miR-4511            | 3 |
| <i>circCDC14B</i> | miR-4514/4692       | 1 |

|                   |                       |   |
|-------------------|-----------------------|---|
| <i>circCDC14B</i> | miR-4517              | 4 |
| <i>circCDC14B</i> | miR-4519              | 2 |
| <i>circCDC14B</i> | miR-452-3p            | 2 |
| <i>circCDC14B</i> | miR-452-5p/892-3p     | 1 |
| <i>circCDC14B</i> | miR-4520-2-3p         | 3 |
| <i>circCDC14B</i> | miR-4520-3p           | 1 |
| <i>circCDC14B</i> | miR-4520-5p           | 1 |
| <i>circCDC14B</i> | miR-4524-5p           | 1 |
| <i>circCDC14B</i> | miR-4524a-3p          | 2 |
| <i>circCDC14B</i> | miR-4528              | 5 |
| <i>circCDC14B</i> | miR-4529-3p           | 3 |
| <i>circCDC14B</i> | miR-4531              | 3 |
| <i>circCDC14B</i> | miR-4533              | 1 |
| <i>circCDC14B</i> | miR-4535              | 3 |
| <i>circCDC14B</i> | miR-4536-5p           | 1 |
| <i>circCDC14B</i> | miR-4539              | 1 |
| <i>circCDC14B</i> | miR-454-5p            | 1 |
| <i>circCDC14B</i> | miR-455-3p.1          | 1 |
| <i>circCDC14B</i> | miR-455-3p.2          | 6 |
| <i>circCDC14B</i> | miR-4635              | 5 |
| <i>circCDC14B</i> | miR-4639-3p           | 2 |
| <i>circCDC14B</i> | miR-4640-3p           | 2 |
| <i>circCDC14B</i> | miR-4649-3p           | 1 |
| <i>circCDC14B</i> | miR-4652-3p           | 4 |
| <i>circCDC14B</i> | miR-4652-5p           | 1 |
| <i>circCDC14B</i> | miR-4659a-3p/4659b-3p | 4 |
| <i>circCDC14B</i> | miR-4659a-5p/4659b-5p | 3 |
| <i>circCDC14B</i> | miR-4661-3p           | 2 |
| <i>circCDC14B</i> | miR-4662-5p           | 2 |
| <i>circCDC14B</i> | miR-4662a-3p          | 1 |
| <i>circCDC14B</i> | miR-4663              | 2 |
| <i>circCDC14B</i> | miR-4666a-5p          | 3 |
| <i>circCDC14B</i> | miR-4668-3p           | 1 |
| <i>circCDC14B</i> | miR-4669              | 1 |
| <i>circCDC14B</i> | miR-4670-3p           | 4 |
| <i>circCDC14B</i> | miR-4677-3p           | 1 |
| <i>circCDC14B</i> | miR-4679              | 1 |
| <i>circCDC14B</i> | miR-4680-3p           | 2 |

|                   |                             |   |
|-------------------|-----------------------------|---|
| <i>circCDC14B</i> | miR-4682                    | 1 |
| <i>circCDC14B</i> | miR-4683                    | 1 |
| <i>circCDC14B</i> | miR-4684-3p                 | 3 |
| <i>circCDC14B</i> | miR-4684-5p                 | 1 |
| <i>circCDC14B</i> | miR-4686                    | 2 |
| <i>circCDC14B</i> | miR-4688/6743-5p            | 1 |
| <i>circCDC14B</i> | miR-4691-5p/6792-3p         | 1 |
| <i>circCDC14B</i> | miR-4694-3p                 | 2 |
| <i>circCDC14B</i> | miR-4695-3p                 | 1 |
| <i>circCDC14B</i> | miR-4696                    | 4 |
| <i>circCDC14B</i> | miR-4700-3p                 | 1 |
| <i>circCDC14B</i> | miR-4704-5p                 | 2 |
| <i>circCDC14B</i> | miR-4709-3p                 | 2 |
| <i>circCDC14B</i> | miR-4709-5p                 | 1 |
| <i>circCDC14B</i> | miR-4711-3p                 | 1 |
| <i>circCDC14B</i> | miR-4711-5p                 | 2 |
| <i>circCDC14B</i> | miR-4712-3p                 | 2 |
| <i>circCDC14B</i> | miR-4714-3p                 | 1 |
| <i>circCDC14B</i> | miR-4714-5p                 | 2 |
| <i>circCDC14B</i> | miR-4715-5p                 | 1 |
| <i>circCDC14B</i> | miR-4718                    | 1 |
| <i>circCDC14B</i> | miR-4720-5p/4799-3p/5588-5p | 3 |
| <i>circCDC14B</i> | miR-4722-5p                 | 1 |
| <i>circCDC14B</i> | miR-4728-3p                 | 6 |
| <i>circCDC14B</i> | miR-4729                    | 2 |
| <i>circCDC14B</i> | miR-4731-3p/4801            | 2 |
| <i>circCDC14B</i> | miR-4732-3p                 | 1 |
| <i>circCDC14B</i> | miR-4733-3p                 | 1 |
| <i>circCDC14B</i> | miR-4736                    | 1 |
| <i>circCDC14B</i> | miR-4742-3p                 | 1 |
| <i>circCDC14B</i> | miR-4742-5p                 | 1 |
| <i>circCDC14B</i> | miR-4743-3p                 | 4 |
| <i>circCDC14B</i> | miR-4747-3p                 | 1 |
| <i>circCDC14B</i> | miR-4750-3p                 | 1 |
| <i>circCDC14B</i> | miR-4750-5p                 | 1 |
| <i>circCDC14B</i> | miR-4752                    | 2 |
| <i>circCDC14B</i> | miR-4753-3p                 | 5 |
| <i>circCDC14B</i> | miR-4754                    | 2 |

|                   |                     |   |
|-------------------|---------------------|---|
| <i>circCDC14B</i> | miR-4756-3p         | 2 |
| <i>circCDC14B</i> | miR-4757-3p         | 1 |
| <i>circCDC14B</i> | miR-4757-5p/6744-3p | 1 |
| <i>circCDC14B</i> | miR-4760-3p         | 1 |
| <i>circCDC14B</i> | miR-4761-5p         | 1 |
| <i>circCDC14B</i> | miR-4762-5p         | 1 |
| <i>circCDC14B</i> | miR-4763-5p         | 1 |
| <i>circCDC14B</i> | miR-4764-3p         | 1 |
| <i>circCDC14B</i> | miR-4764-5p         | 2 |
| <i>circCDC14B</i> | miR-4765            | 1 |
| <i>circCDC14B</i> | miR-4768-3p         | 1 |
| <i>circCDC14B</i> | miR-4768-5p/6833-3p | 6 |
| <i>circCDC14B</i> | miR-4771            | 2 |
| <i>circCDC14B</i> | miR-4772-5p         | 3 |
| <i>circCDC14B</i> | miR-4773            | 1 |
| <i>circCDC14B</i> | miR-4774-3p         | 1 |
| <i>circCDC14B</i> | miR-4774-5p         | 1 |
| <i>circCDC14B</i> | miR-4775            | 2 |
| <i>circCDC14B</i> | miR-4776-3p         | 1 |
| <i>circCDC14B</i> | miR-4776-5p         | 3 |
| <i>circCDC14B</i> | miR-4778-3p         | 1 |
| <i>circCDC14B</i> | miR-4778-5p         | 2 |
| <i>circCDC14B</i> | miR-4781-3p         | 1 |
| <i>circCDC14B</i> | miR-4786-5p         | 2 |
| <i>circCDC14B</i> | miR-4788            | 2 |
| <i>circCDC14B</i> | miR-4789-5p         | 1 |
| <i>circCDC14B</i> | miR-4790-3p         | 1 |
| <i>circCDC14B</i> | miR-4793-3p         | 1 |
| <i>circCDC14B</i> | miR-4793-5p         | 3 |
| <i>circCDC14B</i> | miR-4795-5p         | 1 |
| <i>circCDC14B</i> | miR-4796-3p         | 1 |
| <i>circCDC14B</i> | miR-4797-5p         | 1 |
| <i>circCDC14B</i> | miR-4800-5p         | 1 |
| <i>circCDC14B</i> | miR-4802-3p         | 2 |
| <i>circCDC14B</i> | miR-4802-5p         | 2 |
| <i>circCDC14B</i> | miR-485-5p          | 1 |
| <i>circCDC14B</i> | miR-486-3p          | 1 |
| <i>circCDC14B</i> | miR-488-3p          | 3 |

|                   |                             |   |
|-------------------|-----------------------------|---|
| <i>circCDC14B</i> | miR-488-5p                  | 1 |
| <i>circCDC14B</i> | miR-489-3p                  | 1 |
| <i>circCDC14B</i> | miR-492                     | 1 |
| <i>circCDC14B</i> | miR-493-3p                  | 1 |
| <i>circCDC14B</i> | miR-493-5p                  | 4 |
| <i>circCDC14B</i> | miR-495-3p                  | 1 |
| <i>circCDC14B</i> | miR-495-5p                  | 1 |
| <i>circCDC14B</i> | miR-496.1                   | 1 |
| <i>circCDC14B</i> | miR-497-3p                  | 1 |
| <i>circCDC14B</i> | miR-498                     | 3 |
| <i>circCDC14B</i> | miR-4999-5p                 | 1 |
| <i>circCDC14B</i> | miR-499a-3p/499b-3p         | 1 |
| <i>circCDC14B</i> | miR-499b-5p                 | 1 |
| <i>circCDC14B</i> | miR-5000-3p                 | 1 |
| <i>circCDC14B</i> | miR-5002-5p                 | 2 |
| <i>circCDC14B</i> | miR-5003-5p                 | 1 |
| <i>circCDC14B</i> | miR-5004-3p                 | 3 |
| <i>circCDC14B</i> | miR-5007-3p                 | 1 |
| <i>circCDC14B</i> | miR-5008-3p/6737-3p/7157-3p | 1 |
| <i>circCDC14B</i> | miR-5008-5p                 | 1 |
| <i>circCDC14B</i> | miR-5009-5p/8058            | 1 |
| <i>circCDC14B</i> | miR-501-3p/502-3p           | 1 |
| <i>circCDC14B</i> | miR-5010-3p                 | 2 |
| <i>circCDC14B</i> | miR-5011-5p                 | 3 |
| <i>circCDC14B</i> | miR-502-5p                  | 3 |
| <i>circCDC14B</i> | miR-503-5p                  | 4 |
| <i>circCDC14B</i> | miR-504-3p                  | 2 |
| <i>circCDC14B</i> | miR-505-5p                  | 1 |
| <i>circCDC14B</i> | miR-507/557                 | 1 |
| <i>circCDC14B</i> | miR-508-3p                  | 1 |
| <i>circCDC14B</i> | miR-5088-3p                 | 1 |
| <i>circCDC14B</i> | miR-5089-3p                 | 4 |
| <i>circCDC14B</i> | miR-5089-5p                 | 1 |
| <i>circCDC14B</i> | miR-509-3-5p/509-5p/4418    | 1 |
| <i>circCDC14B</i> | miR-509-3p                  | 1 |
| <i>circCDC14B</i> | miR-5095/7151-3p            | 1 |
| <i>circCDC14B</i> | miR-5096                    | 3 |
| <i>circCDC14B</i> | miR-510-3p                  | 4 |

|                   |                                      |   |
|-------------------|--------------------------------------|---|
| <i>circCDC14B</i> | miR-511-5p                           | 1 |
| <i>circCDC14B</i> | miR-513b-3p                          | 2 |
| <i>circCDC14B</i> | miR-513b-5p                          | 2 |
| <i>circCDC14B</i> | miR-514a-3p                          | 1 |
| <i>circCDC14B</i> | miR-514a-5p                          | 2 |
| <i>circCDC14B</i> | miR-515-5p/519e-5p                   | 1 |
| <i>circCDC14B</i> | miR-516a-3p/516b-3p/7162-5p          | 2 |
| <i>circCDC14B</i> | miR-516a-5p                          | 1 |
| <i>circCDC14B</i> | miR-5186                             | 1 |
| <i>circCDC14B</i> | miR-5187-3p                          | 2 |
| <i>circCDC14B</i> | miR-518a-5p/527                      | 2 |
| <i>circCDC14B</i> | miR-518c-5p                          | 3 |
| <i>circCDC14B</i> | miR-519-3p                           | 1 |
| <i>circCDC14B</i> | miR-5190                             | 1 |
| <i>circCDC14B</i> | miR-5192                             | 2 |
| <i>circCDC14B</i> | miR-5194                             | 1 |
| <i>circCDC14B</i> | miR-5195-5p                          | 2 |
| <i>circCDC14B</i> | miR-5196-3p                          | 3 |
| <i>circCDC14B</i> | miR-5197-3p                          | 4 |
| <i>circCDC14B</i> | miR-519d-5p                          | 1 |
| <i>circCDC14B</i> | miR-522-3p                           | 2 |
| <i>circCDC14B</i> | miR-524-3p/525-3p                    | 1 |
| <i>circCDC14B</i> | miR-524-5p                           | 1 |
| <i>circCDC14B</i> | miR-526b-5p                          | 3 |
| <i>circCDC14B</i> | miR-532-5p                           | 1 |
| <i>circCDC14B</i> | miR-539-5p                           | 3 |
| <i>circCDC14B</i> | miR-542-3p                           | 1 |
| <i>circCDC14B</i> | miR-543                              | 4 |
| <i>circCDC14B</i> | miR-544a                             | 1 |
| <i>circCDC14B</i> | miR-544b                             | 2 |
| <i>circCDC14B</i> | miR-545-5p                           | 2 |
| <i>circCDC14B</i> | miR-548ah-5p/3609                    | 1 |
| <i>circCDC14B</i> | miR-548aj-5p/548f-5p/548g-5p/548x-5p | 2 |
| <i>circCDC14B</i> | miR-548ao-3p                         | 2 |
| <i>circCDC14B</i> | miR-548ao-5p/548ax                   | 1 |
| <i>circCDC14B</i> | miR-548at-5p                         | 1 |
| <i>circCDC14B</i> | miR-548au-3p                         | 1 |
| <i>circCDC14B</i> | miR-548aw                            | 2 |

|                   |                                               |   |
|-------------------|-----------------------------------------------|---|
| <i>circCDC14B</i> | miR-548az-3p/548ar-3p/548a-3p/548e-3p/548f-3p |   |
| <i>circCDC14B</i> | miR-548az-5p/548t-5p                          | 1 |
| <i>circCDC14B</i> | miR-548b-3p                                   | 3 |
| <i>circCDC14B</i> | miR-548c-3p                                   | 5 |
| <i>circCDC14B</i> | miR-548e-5p                                   | 2 |
| <i>circCDC14B</i> | miR-548m                                      | 1 |
| <i>circCDC14B</i> | miR-548n                                      | 1 |
| <i>circCDC14B</i> | miR-548p                                      | 4 |
| <i>circCDC14B</i> | miR-548q                                      | 1 |
| <i>circCDC14B</i> | miR-548v                                      | 4 |
| <i>circCDC14B</i> | miR-549a                                      | 1 |
| <i>circCDC14B</i> | miR-551b-5p                                   | 3 |
| <i>circCDC14B</i> | miR-552-5p                                    | 2 |
| <i>circCDC14B</i> | miR-5571-3p                                   | 1 |
| <i>circCDC14B</i> | miR-5571-5p                                   | 1 |
| <i>circCDC14B</i> | miR-5572                                      | 2 |
| <i>circCDC14B</i> | miR-5579-5p                                   | 1 |
| <i>circCDC14B</i> | miR-558                                       | 2 |
| <i>circCDC14B</i> | miR-5580-5p                                   | 3 |
| <i>circCDC14B</i> | miR-5582-3p                                   | 1 |
| <i>circCDC14B</i> | miR-5583-3p                                   | 4 |
| <i>circCDC14B</i> | miR-5585-3p                                   | 6 |
| <i>circCDC14B</i> | miR-5585-5p                                   | 1 |
| <i>circCDC14B</i> | miR-5586-3p                                   | 2 |
| <i>circCDC14B</i> | miR-5586-5p                                   | 1 |
| <i>circCDC14B</i> | miR-5590-5p                                   | 3 |
| <i>circCDC14B</i> | miR-561-3p                                    | 1 |
| <i>circCDC14B</i> | miR-561-5p                                    | 2 |
| <i>circCDC14B</i> | miR-5680                                      | 2 |
| <i>circCDC14B</i> | miR-5683                                      | 3 |
| <i>circCDC14B</i> | miR-5692a                                     | 1 |
| <i>circCDC14B</i> | miR-5692bc                                    | 1 |
| <i>circCDC14B</i> | miR-5693                                      | 2 |
| <i>circCDC14B</i> | miR-5694                                      | 3 |
| <i>circCDC14B</i> | miR-5695                                      | 1 |
| <i>circCDC14B</i> | miR-5696                                      | 4 |
| <i>circCDC14B</i> | miR-570-3p                                    | 2 |
| <i>circCDC14B</i> | miR-5700                                      | 4 |



|                   |                  |   |
|-------------------|------------------|---|
| <i>circCDC14B</i> | miR-5701         | 2 |
| <i>circCDC14B</i> | miR-573/3616-5p  | 2 |
| <i>circCDC14B</i> | miR-575/4676-5p  | 2 |
| <i>circCDC14B</i> | miR-576-3p       | 1 |
| <i>circCDC14B</i> | miR-577          | 4 |
| <i>circCDC14B</i> | miR-578          | 1 |
| <i>circCDC14B</i> | miR-579-3p       | 4 |
| <i>circCDC14B</i> | miR-580-3p       | 3 |
| <i>circCDC14B</i> | miR-580-5p       | 1 |
| <i>circCDC14B</i> | miR-581          | 1 |
| <i>circCDC14B</i> | miR-582-5p       | 1 |
| <i>circCDC14B</i> | miR-583          | 3 |
| <i>circCDC14B</i> | miR-587          | 2 |
| <i>circCDC14B</i> | miR-589-3p       | 1 |
| <i>circCDC14B</i> | miR-589-5p       | 2 |
| <i>circCDC14B</i> | miR-590-3p       | 1 |
| <i>circCDC14B</i> | miR-591          | 1 |
| <i>circCDC14B</i> | miR-596          | 1 |
| <i>circCDC14B</i> | miR-597-3p       | 1 |
| <i>circCDC14B</i> | miR-597-5p       | 1 |
| <i>circCDC14B</i> | miR-598-5p       | 1 |
| <i>circCDC14B</i> | miR-605-3p       | 1 |
| <i>circCDC14B</i> | miR-6071         | 1 |
| <i>circCDC14B</i> | miR-6072/6891-3p | 1 |
| <i>circCDC14B</i> | miR-6073         | 1 |
| <i>circCDC14B</i> | miR-6074         | 4 |
| <i>circCDC14B</i> | miR-6077         | 2 |
| <i>circCDC14B</i> | miR-6079         | 3 |
| <i>circCDC14B</i> | miR-6083         | 5 |
| <i>circCDC14B</i> | miR-6085/6813-5p | 1 |
| <i>circCDC14B</i> | miR-6089         | 1 |
| <i>circCDC14B</i> | miR-609          | 1 |
| <i>circCDC14B</i> | miR-6124         | 1 |
| <i>circCDC14B</i> | miR-6128         | 1 |
| <i>circCDC14B</i> | miR-615-5p       | 2 |
| <i>circCDC14B</i> | miR-617          | 1 |
| <i>circCDC14B</i> | miR-618          | 2 |
| <i>circCDC14B</i> | miR-619-3p       | 1 |

|                   |                    |   |
|-------------------|--------------------|---|
| <i>circCDC14B</i> | miR-619-5p/6506-5p | 1 |
| <i>circCDC14B</i> | miR-624-3p         | 1 |
| <i>circCDC14B</i> | miR-627-3p         | 2 |
| <i>circCDC14B</i> | miR-628-5p         | 2 |
| <i>circCDC14B</i> | miR-629-3p         | 3 |
| <i>circCDC14B</i> | miR-630            | 2 |
| <i>circCDC14B</i> | miR-631/3661       | 1 |
| <i>circCDC14B</i> | miR-632/4288       | 1 |
| <i>circCDC14B</i> | miR-633            | 2 |
| <i>circCDC14B</i> | miR-640            | 1 |
| <i>circCDC14B</i> | miR-641/3617-5p    | 1 |
| <i>circCDC14B</i> | miR-642-3p         | 1 |
| <i>circCDC14B</i> | miR-645            | 1 |
| <i>circCDC14B</i> | miR-646            | 4 |
| <i>circCDC14B</i> | miR-647            | 1 |
| <i>circCDC14B</i> | miR-6499-3p        | 3 |
| <i>circCDC14B</i> | miR-6500-3p        | 1 |
| <i>circCDC14B</i> | miR-6501-3p        | 2 |
| <i>circCDC14B</i> | miR-6502-3p        | 4 |
| <i>circCDC14B</i> | miR-6503-3p        | 1 |
| <i>circCDC14B</i> | miR-6504-3p        | 4 |
| <i>circCDC14B</i> | miR-6505-3p        | 1 |
| <i>circCDC14B</i> | miR-6505-5p        | 1 |
| <i>circCDC14B</i> | miR-6507-5p        | 6 |
| <i>circCDC14B</i> | miR-651-3p         | 3 |
| <i>circCDC14B</i> | miR-6511-5p        | 1 |
| <i>circCDC14B</i> | miR-6512-5p        | 3 |
| <i>circCDC14B</i> | miR-6514-5p        | 2 |
| <i>circCDC14B</i> | miR-6515-3p        | 4 |
| <i>circCDC14B</i> | miR-6516-3p        | 1 |
| <i>circCDC14B</i> | miR-6516-5p        | 2 |
| <i>circCDC14B</i> | miR-653-3p         | 2 |
| <i>circCDC14B</i> | miR-654-3p         | 1 |
| <i>circCDC14B</i> | miR-656-3p         | 2 |
| <i>circCDC14B</i> | miR-659-5p         | 1 |
| <i>circCDC14B</i> | miR-664a-3p        | 2 |
| <i>circCDC14B</i> | miR-664a-5p/4794   | 6 |
| <i>circCDC14B</i> | miR-670-3p         | 3 |

|                   |                             |   |
|-------------------|-----------------------------|---|
| <i>circCDC14B</i> | miR-6715a-3p                | 1 |
| <i>circCDC14B</i> | miR-6716-3p                 | 1 |
| <i>circCDC14B</i> | miR-6716-5p                 | 1 |
| <i>circCDC14B</i> | miR-6719-3p                 | 1 |
| <i>circCDC14B</i> | miR-6721-5p                 | 1 |
| <i>circCDC14B</i> | miR-6724-5p/6773-5p         | 1 |
| <i>circCDC14B</i> | miR-6728-3p                 | 1 |
| <i>circCDC14B</i> | miR-6728-5p                 | 1 |
| <i>circCDC14B</i> | miR-6730-3p                 | 1 |
| <i>circCDC14B</i> | miR-6731-3p                 | 2 |
| <i>circCDC14B</i> | miR-6731-5p/8085            | 2 |
| <i>circCDC14B</i> | miR-6733-3p                 | 2 |
| <i>circCDC14B</i> | miR-6734-3p                 | 2 |
| <i>circCDC14B</i> | miR-6734-5p                 | 2 |
| <i>circCDC14B</i> | miR-6737-5p/6812-5p/6819-5p | 1 |
| <i>circCDC14B</i> | miR-6738-3p                 | 1 |
| <i>circCDC14B</i> | miR-6739-3p                 | 2 |
| <i>circCDC14B</i> | miR-6740-3p                 | 1 |
| <i>circCDC14B</i> | miR-6744-5p                 | 1 |
| <i>circCDC14B</i> | miR-6748-5p                 | 1 |
| <i>circCDC14B</i> | miR-6749-3p                 | 1 |
| <i>circCDC14B</i> | miR-6749-5p                 | 1 |
| <i>circCDC14B</i> | miR-675-3p                  | 2 |
| <i>circCDC14B</i> | miR-6750-3p                 | 3 |
| <i>circCDC14B</i> | miR-6755-3p                 | 1 |
| <i>circCDC14B</i> | miR-6758-3p                 | 3 |
| <i>circCDC14B</i> | miR-6758-5p/6856-5p         | 1 |
| <i>circCDC14B</i> | miR-6759-3p                 | 1 |
| <i>circCDC14B</i> | miR-676-5p                  | 4 |
| <i>circCDC14B</i> | miR-6760-3p                 | 1 |
| <i>circCDC14B</i> | miR-6761-5p                 | 3 |
| <i>circCDC14B</i> | miR-6764-3p/6824-3p         | 3 |
| <i>circCDC14B</i> | miR-6767-5p                 | 1 |
| <i>circCDC14B</i> | miR-6768-5p                 | 2 |
| <i>circCDC14B</i> | miR-6770-5p                 | 2 |
| <i>circCDC14B</i> | miR-6772-5p                 | 1 |
| <i>circCDC14B</i> | miR-6774-3p                 | 1 |
| <i>circCDC14B</i> | miR-6776-3p                 | 1 |

|                   |                     |   |
|-------------------|---------------------|---|
| <i>circCDC14B</i> | miR-6777-3p         | 2 |
| <i>circCDC14B</i> | miR-6780a-3p        | 3 |
| <i>circCDC14B</i> | miR-6783-5p         | 2 |
| <i>circCDC14B</i> | miR-6787-3p         | 1 |
| <i>circCDC14B</i> | miR-6790-3p         | 2 |
| <i>circCDC14B</i> | miR-6793-5p         | 1 |
| <i>circCDC14B</i> | miR-6794-3p         | 1 |
| <i>circCDC14B</i> | miR-6800-3p         | 2 |
| <i>circCDC14B</i> | miR-6801-3p/6810-3p | 1 |
| <i>circCDC14B</i> | miR-6801-5p         | 1 |
| <i>circCDC14B</i> | miR-6804-5p         | 1 |
| <i>circCDC14B</i> | miR-6808-3p         | 1 |
| <i>circCDC14B</i> | miR-6809-3p         | 6 |
| <i>circCDC14B</i> | miR-6810-5p         | 2 |
| <i>circCDC14B</i> | miR-6812-3p         | 1 |
| <i>circCDC14B</i> | miR-6813-3p         | 2 |
| <i>circCDC14B</i> | miR-6815-3p         | 4 |
| <i>circCDC14B</i> | miR-6817-3p         | 3 |
| <i>circCDC14B</i> | miR-6818-3p         | 2 |
| <i>circCDC14B</i> | miR-6821-3p         | 2 |
| <i>circCDC14B</i> | miR-6821-5p         | 1 |
| <i>circCDC14B</i> | miR-6822-3p         | 2 |
| <i>circCDC14B</i> | miR-6825-5p         | 2 |
| <i>circCDC14B</i> | miR-6826-3p         | 1 |
| <i>circCDC14B</i> | miR-6828-3p         | 1 |
| <i>circCDC14B</i> | miR-6830-5p         | 2 |
| <i>circCDC14B</i> | miR-6833-5p         | 2 |
| <i>circCDC14B</i> | miR-6834-3p         | 1 |
| <i>circCDC14B</i> | miR-6834-5p         | 2 |
| <i>circCDC14B</i> | miR-6840-5p         | 1 |
| <i>circCDC14B</i> | miR-6841-3p         | 1 |
| <i>circCDC14B</i> | miR-6842-3p         | 1 |
| <i>circCDC14B</i> | miR-6844            | 5 |
| <i>circCDC14B</i> | miR-6846-3p         | 2 |
| <i>circCDC14B</i> | miR-6850-5p         | 2 |
| <i>circCDC14B</i> | miR-6853-3p         | 2 |
| <i>circCDC14B</i> | miR-6853-5p         | 1 |
| <i>circCDC14B</i> | miR-6857-5p         | 2 |

|                   |             |   |
|-------------------|-------------|---|
| <i>circCDC14B</i> | miR-6858-3p | 2 |
| <i>circCDC14B</i> | miR-6859-3p | 2 |
| <i>circCDC14B</i> | miR-6861-3p | 1 |
| <i>circCDC14B</i> | miR-6865-3p | 1 |
| <i>circCDC14B</i> | miR-6867-5p | 1 |
| <i>circCDC14B</i> | miR-6868-3p | 1 |
| <i>circCDC14B</i> | miR-6868-5p | 3 |
| <i>circCDC14B</i> | miR-6869-5p | 1 |
| <i>circCDC14B</i> | miR-6871-3p | 2 |
| <i>circCDC14B</i> | miR-6873-3p | 2 |
| <i>circCDC14B</i> | miR-6875-3p | 4 |
| <i>circCDC14B</i> | miR-6878-3p | 1 |
| <i>circCDC14B</i> | miR-6878-5p | 2 |
| <i>circCDC14B</i> | miR-6880-3p | 1 |
| <i>circCDC14B</i> | miR-6880-5p | 1 |
| <i>circCDC14B</i> | miR-6881-3p | 3 |
| <i>circCDC14B</i> | miR-6882-3p | 3 |
| <i>circCDC14B</i> | miR-6884-3p | 1 |
| <i>circCDC14B</i> | miR-6885-3p | 1 |
| <i>circCDC14B</i> | miR-6888-3p | 1 |
| <i>circCDC14B</i> | miR-6888-5p | 1 |
| <i>circCDC14B</i> | miR-6889-3p | 1 |
| <i>circCDC14B</i> | miR-6890-3p | 1 |
| <i>circCDC14B</i> | miR-6890-5p | 1 |
| <i>circCDC14B</i> | miR-7-3p    | 2 |
| <i>circCDC14B</i> | miR-7-5p    | 2 |
| <i>circCDC14B</i> | miR-7108-3p | 1 |
| <i>circCDC14B</i> | miR-711     | 1 |
| <i>circCDC14B</i> | miR-7110-3p | 3 |
| <i>circCDC14B</i> | miR-7111-3p | 3 |
| <i>circCDC14B</i> | miR-7112-3p | 2 |
| <i>circCDC14B</i> | miR-7112-5p | 1 |
| <i>circCDC14B</i> | miR-7114-5p | 1 |
| <i>circCDC14B</i> | miR-7150    | 3 |
| <i>circCDC14B</i> | miR-7153-3p | 2 |
| <i>circCDC14B</i> | miR-7154-5p | 1 |
| <i>circCDC14B</i> | miR-7156-3p | 1 |
| <i>circCDC14B</i> | miR-7158-3p | 3 |

|                   |              |   |
|-------------------|--------------|---|
| <i>circCDC14B</i> | miR-7160-5p  | 2 |
| <i>circCDC14B</i> | miR-7161-3p  | 3 |
| <i>circCDC14B</i> | miR-7162-3p  | 1 |
| <i>circCDC14B</i> | miR-744-3p   | 2 |
| <i>circCDC14B</i> | miR-7515     | 1 |
| <i>circCDC14B</i> | miR-758-3p   | 1 |
| <i>circCDC14B</i> | miR-760      | 2 |
| <i>circCDC14B</i> | miR-7641     | 2 |
| <i>circCDC14B</i> | miR-769-5p   | 2 |
| <i>circCDC14B</i> | miR-7703     | 1 |
| <i>circCDC14B</i> | miR-7704     | 2 |
| <i>circCDC14B</i> | miR-7705     | 2 |
| <i>circCDC14B</i> | miR-7843-3p  | 2 |
| <i>circCDC14B</i> | miR-7850-5p  | 3 |
| <i>circCDC14B</i> | miR-7851-3p  | 1 |
| <i>circCDC14B</i> | miR-7855-5p  | 1 |
| <i>circCDC14B</i> | miR-7856-5p  | 3 |
| <i>circCDC14B</i> | miR-7975     | 1 |
| <i>circCDC14B</i> | miR-7978     | 1 |
| <i>circCDC14B</i> | miR-802      | 2 |
| <i>circCDC14B</i> | miR-8056     | 1 |
| <i>circCDC14B</i> | miR-8057     | 4 |
| <i>circCDC14B</i> | miR-8060     | 1 |
| <i>circCDC14B</i> | miR-8062     | 1 |
| <i>circCDC14B</i> | miR-8064     | 1 |
| <i>circCDC14B</i> | miR-8068     | 1 |
| <i>circCDC14B</i> | miR-8069     | 1 |
| <i>circCDC14B</i> | miR-8071     | 1 |
| <i>circCDC14B</i> | miR-8074     | 2 |
| <i>circCDC14B</i> | miR-8075     | 1 |
| <i>circCDC14B</i> | miR-8077     | 2 |
| <i>circCDC14B</i> | miR-8088     | 1 |
| <i>circCDC14B</i> | miR-873-3p   | 2 |
| <i>circCDC14B</i> | miR-873-5p.2 | 1 |
| <i>circCDC14B</i> | miR-885-3p   | 2 |
| <i>circCDC14B</i> | miR-885-5p   | 4 |
| <i>circCDC14B</i> | miR-888-5p   | 2 |
| <i>circCDC14B</i> | miR-889-5p   | 3 |

|                    |                    |    |
|--------------------|--------------------|----|
| <i>circCDC14B</i>  | miR-890            | 1  |
| <i>circCDC14B</i>  | miR-891a-3p        | 1  |
| <i>circCDC14B</i>  | miR-892a           | 1  |
| <i>circCDC14B</i>  | miR-9-5p           | 2  |
| <i>circCDC14B</i>  | miR-922            | 4  |
| <i>circCDC14B</i>  | miR-936            | 1  |
| <i>circCDC14B</i>  | miR-939-5p/1343-5p | 2  |
| <i>circCDC14B</i>  | miR-942-5p         | 6  |
| <i>circCDC14B</i>  | miR-943            | 1  |
| <i>circCDC14B</i>  | miR-95-5p          | 2  |
| <i>circCDC14B</i>  | miR-96-3p          | 2  |
| <i>circCDC14B</i>  | miR-4716-5p        | 1  |
| <i>circCDC14B</i>  | miR-1252-5p        | 1  |
| <i>circCDC14B</i>  | miR-6816-3p        | 1  |
| <i>circCDC14B</i>  | miR-7151-5p        | 1  |
| <i>circCDC14B</i>  | miR-8080           | 1  |
| <i>circCDC14B</i>  | miR-6507-3p        | 1  |
| <i>circCDR1-AS</i> | miR-103a-2-5p      | 1  |
| <i>circCDR1-AS</i> | miR-1180-3p        | 1  |
| <i>circCDR1-AS</i> | miR-1180-5p        | 1  |
| <i>circCDR1-AS</i> | miR-1203           | 1  |
| <i>circCDR1-AS</i> | miR-1225-3p        | 1  |
| <i>circCDR1-AS</i> | miR-1225-5p        | 1  |
| <i>circCDR1-AS</i> | miR-1226-5p        | 1  |
| <i>circCDR1-AS</i> | miR-1229-5p        | 1  |
| <i>circCDR1-AS</i> | miR-1231           | 1  |
| <i>circCDR1-AS</i> | miR-1243           | 10 |
| <i>circCDR1-AS</i> | miR-1245b-3p       | 1  |
| <i>circCDR1-AS</i> | miR-1246           | 11 |
| <i>circCDR1-AS</i> | miR-1251-3p        | 2  |
| <i>circCDR1-AS</i> | miR-126-3p.1       | 3  |
| <i>circCDR1-AS</i> | miR-126-5p         | 2  |
| <i>circCDR1-AS</i> | miR-1261           | 4  |
| <i>circCDR1-AS</i> | miR-1266-5p/4518   | 1  |
| <i>circCDR1-AS</i> | miR-1269           | 1  |
| <i>circCDR1-AS</i> | miR-1270           | 4  |
| <i>circCDR1-AS</i> | miR-1273f          | 3  |
| <i>circCDR1-AS</i> | miR-1273h-3p       | 1  |

|                    |                                              |    |
|--------------------|----------------------------------------------|----|
| <i>circCDR1-AS</i> | miR-1277-3p                                  | 3  |
| <i>circCDR1-AS</i> | miR-1287-5p                                  | 12 |
| <i>circCDR1-AS</i> | miR-129-3p                                   | 1  |
| <i>circCDR1-AS</i> | miR-129-5p                                   | 2  |
| <i>circCDR1-AS</i> | miR-1290                                     | 25 |
| <i>circCDR1-AS</i> | miR-1298-3p                                  | 2  |
| <i>circCDR1-AS</i> | miR-1299                                     | 20 |
| <i>circCDR1-AS</i> | miR-1304-5p                                  | 1  |
| <i>circCDR1-AS</i> | miR-1324                                     | 1  |
| <i>circCDR1-AS</i> | miR-1343-3p                                  | 4  |
| <i>circCDR1-AS</i> | miR-135-5p                                   | 4  |
| <i>circCDR1-AS</i> | miR-137                                      | 1  |
| <i>circCDR1-AS</i> | miR-139-3p                                   | 3  |
| <i>circCDR1-AS</i> | miR-143-3p                                   | 3  |
| <i>circCDR1-AS</i> | miR-145-3p                                   | 4  |
| <i>circCDR1-AS</i> | miR-146b-3p                                  | 1  |
| <i>circCDR1-AS</i> | miR-149-3p/4728-5p/6785-5p/6883-5p           | 1  |
| <i>circCDR1-AS</i> | miR-154-5p                                   | 1  |
| <i>circCDR1-AS</i> | miR-15a-3p                                   | 1  |
| <i>circCDR1-AS</i> | miR-197-5p/3132                              | 1  |
| <i>circCDR1-AS</i> | miR-204-3p/4646-5p                           | 1  |
| <i>circCDR1-AS</i> | miR-21-5p/590-5p                             | 1  |
| <i>circCDR1-AS</i> | miR-219-5p                                   | 3  |
| <i>circCDR1-AS</i> | miR-219a-1-3p                                | 1  |
| <i>circCDR1-AS</i> | miR-223-5p                                   | 1  |
| <i>circCDR1-AS</i> | miR-2355-3p                                  | 1  |
| <i>circCDR1-AS</i> | miR-25-3p/32-5p/92-3p/363-3p/367-3p          | 1  |
| <i>circCDR1-AS</i> | miR-27b-5p                                   | 1  |
| <i>circCDR1-AS</i> | miR-28-3p                                    | 1  |
| <i>circCDR1-AS</i> | miR-299-3p                                   | 3  |
| <i>circCDR1-AS</i> | miR-29a-5p                                   | 1  |
| <i>circCDR1-AS</i> | miR-30-3p                                    | 1  |
| <i>circCDR1-AS</i> | miR-302f                                     | 1  |
| <i>circCDR1-AS</i> | miR-3065-3p                                  | 1  |
| <i>circCDR1-AS</i> | miR-3074-5p                                  | 4  |
| <i>circCDR1-AS</i> | miR-30b-3p/1273h-5p/3689-3p/6779-5p/6780a-5p |    |
| <i>circCDR1-AS</i> | miR-30c-3p/6788-5p                           | 1  |
| <i>circCDR1-AS</i> | miR-31-3p                                    | 1  |



|                    |                  |    |
|--------------------|------------------|----|
| <i>circCDR1-AS</i> | miR-3117-5p      | 4  |
| <i>circCDR1-AS</i> | miR-3119         | 3  |
| <i>circCDR1-AS</i> | miR-3121-5p      | 4  |
| <i>circCDR1-AS</i> | miR-3122/3913-5p | 1  |
| <i>circCDR1-AS</i> | miR-3126-3p      | 2  |
| <i>circCDR1-AS</i> | miR-3126-5p      | 1  |
| <i>circCDR1-AS</i> | miR-3134         | 3  |
| <i>circCDR1-AS</i> | miR-3135b        | 12 |
| <i>circCDR1-AS</i> | miR-3136-5p/4439 | 5  |
| <i>circCDR1-AS</i> | miR-3138         | 1  |
| <i>circCDR1-AS</i> | miR-3140-3p      | 1  |
| <i>circCDR1-AS</i> | miR-3140-5p      | 1  |
| <i>circCDR1-AS</i> | miR-3145-3p      | 2  |
| <i>circCDR1-AS</i> | miR-3147         | 1  |
| <i>circCDR1-AS</i> | miR-3156-5p      | 4  |
| <i>circCDR1-AS</i> | miR-3159         | 3  |
| <i>circCDR1-AS</i> | miR-3165         | 3  |
| <i>circCDR1-AS</i> | miR-3166         | 1  |
| <i>circCDR1-AS</i> | miR-3173-5p      | 1  |
| <i>circCDR1-AS</i> | miR-3185         | 1  |
| <i>circCDR1-AS</i> | miR-3190-3p      | 3  |
| <i>circCDR1-AS</i> | miR-3192-5p      | 1  |
| <i>circCDR1-AS</i> | miR-3200-3p      | 3  |
| <i>circCDR1-AS</i> | miR-3201/4791    | 2  |
| <i>circCDR1-AS</i> | miR-323-3p       | 1  |
| <i>circCDR1-AS</i> | miR-329-5p       | 1  |
| <i>circCDR1-AS</i> | miR-335-3p       | 1  |
| <i>circCDR1-AS</i> | miR-345-3p       | 1  |
| <i>circCDR1-AS</i> | miR-34a-3p       | 1  |
| <i>circCDR1-AS</i> | miR-3612         | 1  |
| <i>circCDR1-AS</i> | miR-3617-3p      | 1  |
| <i>circCDR1-AS</i> | miR-3652/4430    | 2  |
| <i>circCDR1-AS</i> | miR-3654         | 10 |
| <i>circCDR1-AS</i> | miR-3664-3p      | 1  |
| <i>circCDR1-AS</i> | miR-3667-5p      | 15 |
| <i>circCDR1-AS</i> | miR-3678-3p      | 1  |
| <i>circCDR1-AS</i> | miR-3686         | 1  |
| <i>circCDR1-AS</i> | miR-3688-3p      | 3  |

|                    |                                    |    |
|--------------------|------------------------------------|----|
| <i>circCDR1-AS</i> | miR-3689d/6851-5p                  | 1  |
| <i>circCDR1-AS</i> | miR-3690                           | 12 |
| <i>circCDR1-AS</i> | miR-3691-5p                        | 9  |
| <i>circCDR1-AS</i> | miR-375                            | 7  |
| <i>circCDR1-AS</i> | miR-376a-2-5p                      | 5  |
| <i>circCDR1-AS</i> | miR-376a-5p                        | 5  |
| <i>circCDR1-AS</i> | miR-376b-5p/376c-5p                | 4  |
| <i>circCDR1-AS</i> | miR-377-5p/6086                    | 1  |
| <i>circCDR1-AS</i> | miR-378j/6839-5p                   | 8  |
| <i>circCDR1-AS</i> | miR-383-3p                         | 1  |
| <i>circCDR1-AS</i> | miR-383-5p.1                       | 1  |
| <i>circCDR1-AS</i> | miR-383-5p.2                       | 1  |
| <i>circCDR1-AS</i> | miR-3919                           | 1  |
| <i>circCDR1-AS</i> | miR-3920                           | 2  |
| <i>circCDR1-AS</i> | miR-3928-5p/6806-3p                | 3  |
| <i>circCDR1-AS</i> | miR-3929/4419b/4478                | 1  |
| <i>circCDR1-AS</i> | miR-3934-3p                        | 1  |
| <i>circCDR1-AS</i> | miR-3935                           | 2  |
| <i>circCDR1-AS</i> | miR-409-3p                         | 1  |
| <i>circCDR1-AS</i> | miR-409-5p                         | 1  |
| <i>circCDR1-AS</i> | miR-425-5p                         | 1  |
| <i>circCDR1-AS</i> | miR-4254                           | 12 |
| <i>circCDR1-AS</i> | miR-4259                           | 1  |
| <i>circCDR1-AS</i> | miR-4291                           | 1  |
| <i>circCDR1-AS</i> | miR-4292/6791-5p                   | 1  |
| <i>circCDR1-AS</i> | miR-4308                           | 1  |
| <i>circCDR1-AS</i> | miR-432-5p                         | 4  |
| <i>circCDR1-AS</i> | miR-4419a/4510/6127/6129/6130/6133 | 1  |
| <i>circCDR1-AS</i> | miR-4425                           | 1  |
| <i>circCDR1-AS</i> | miR-4426/4647/4662b                | 4  |
| <i>circCDR1-AS</i> | miR-4427                           | 1  |
| <i>circCDR1-AS</i> | miR-4432                           | 8  |
| <i>circCDR1-AS</i> | miR-4443                           | 1  |
| <i>circCDR1-AS</i> | miR-4445-5p                        | 3  |
| <i>circCDR1-AS</i> | miR-4457                           | 1  |
| <i>circCDR1-AS</i> | miR-4461                           | 1  |
| <i>circCDR1-AS</i> | miR-4462                           | 2  |
| <i>circCDR1-AS</i> | miR-4463                           | 3  |

|                    |                     |   |
|--------------------|---------------------|---|
| <i>circCDR1-AS</i> | miR-4468            | 1 |
| <i>circCDR1-AS</i> | miR-4474-5p         | 2 |
| <i>circCDR1-AS</i> | miR-4475            | 1 |
| <i>circCDR1-AS</i> | miR-4476/6876-5p    | 3 |
| <i>circCDR1-AS</i> | miR-4477b           | 1 |
| <i>circCDR1-AS</i> | miR-4491/4657       | 3 |
| <i>circCDR1-AS</i> | miR-4499            | 3 |
| <i>circCDR1-AS</i> | miR-449b-3p         | 1 |
| <i>circCDR1-AS</i> | miR-4505/5787       | 2 |
| <i>circCDR1-AS</i> | miR-450a-1-3p       | 1 |
| <i>circCDR1-AS</i> | miR-4511            | 1 |
| <i>circCDR1-AS</i> | miR-4513/6855-3p    | 1 |
| <i>circCDR1-AS</i> | miR-4529-5p         | 1 |
| <i>circCDR1-AS</i> | miR-4531            | 4 |
| <i>circCDR1-AS</i> | miR-4534/8082       | 3 |
| <i>circCDR1-AS</i> | miR-4633-3p/6500-5p | 1 |
| <i>circCDR1-AS</i> | miR-4635            | 2 |
| <i>circCDR1-AS</i> | miR-4646-3p         | 1 |
| <i>circCDR1-AS</i> | miR-4653-3p         | 1 |
| <i>circCDR1-AS</i> | miR-4664-3p         | 1 |
| <i>circCDR1-AS</i> | miR-4680-3p         | 1 |
| <i>circCDR1-AS</i> | miR-4683            | 3 |
| <i>circCDR1-AS</i> | miR-4687-5p         | 1 |
| <i>circCDR1-AS</i> | miR-4699-3p         | 2 |
| <i>circCDR1-AS</i> | miR-4699-5p         | 8 |
| <i>circCDR1-AS</i> | miR-4703-3p         | 2 |
| <i>circCDR1-AS</i> | miR-4708-5p         | 3 |
| <i>circCDR1-AS</i> | miR-4709-3p         | 1 |
| <i>circCDR1-AS</i> | miR-4715-5p         | 1 |
| <i>circCDR1-AS</i> | miR-4717-5p         | 1 |
| <i>circCDR1-AS</i> | miR-4724-3p         | 4 |
| <i>circCDR1-AS</i> | miR-4728-3p         | 4 |
| <i>circCDR1-AS</i> | miR-4731-3p/4801    | 1 |
| <i>circCDR1-AS</i> | miR-4742-3p         | 1 |
| <i>circCDR1-AS</i> | miR-4747-5p/5196-5p | 3 |
| <i>circCDR1-AS</i> | miR-4752            | 3 |
| <i>circCDR1-AS</i> | miR-4756-3p         | 1 |
| <i>circCDR1-AS</i> | miR-4771            | 1 |

|                    |                    |    |
|--------------------|--------------------|----|
| <i>circCDR1-AS</i> | miR-4772-5p        | 1  |
| <i>circCDR1-AS</i> | miR-4775           | 1  |
| <i>circCDR1-AS</i> | miR-4777-5p        | 1  |
| <i>circCDR1-AS</i> | miR-4778-3p        | 1  |
| <i>circCDR1-AS</i> | miR-4781-3p        | 1  |
| <i>circCDR1-AS</i> | miR-4782-5p/5706   | 20 |
| <i>circCDR1-AS</i> | miR-4786-3p        | 1  |
| <i>circCDR1-AS</i> | miR-4797-5p        | 1  |
| <i>circCDR1-AS</i> | miR-4800-5p        | 1  |
| <i>circCDR1-AS</i> | miR-4802-3p        | 14 |
| <i>circCDR1-AS</i> | miR-490-5p         | 10 |
| <i>circCDR1-AS</i> | miR-5002-5p        | 3  |
| <i>circCDR1-AS</i> | miR-5004-3p        | 2  |
| <i>circCDR1-AS</i> | miR-5008-5p        | 1  |
| <i>circCDR1-AS</i> | miR-5009-5p/8058   | 1  |
| <i>circCDR1-AS</i> | miR-5011-5p        | 2  |
| <i>circCDR1-AS</i> | miR-508-3p         | 3  |
| <i>circCDR1-AS</i> | miR-510-3p         | 1  |
| <i>circCDR1-AS</i> | miR-513b-3p        | 1  |
| <i>circCDR1-AS</i> | miR-514a-3p        | 1  |
| <i>circCDR1-AS</i> | miR-516b-5p        | 20 |
| <i>circCDR1-AS</i> | miR-5186           | 1  |
| <i>circCDR1-AS</i> | miR-5187-3p        | 1  |
| <i>circCDR1-AS</i> | miR-518d-5p/519-5p | 1  |
| <i>circCDR1-AS</i> | miR-5191           | 2  |
| <i>circCDR1-AS</i> | miR-5197-3p        | 1  |
| <i>circCDR1-AS</i> | miR-545-5p         | 1  |
| <i>circCDR1-AS</i> | miR-548ao-3p       | 15 |
| <i>circCDR1-AS</i> | miR-548b-3p        | 1  |
| <i>circCDR1-AS</i> | miR-5579-3p        | 1  |
| <i>circCDR1-AS</i> | miR-5580-3p        | 2  |
| <i>circCDR1-AS</i> | miR-5584-5p        | 2  |
| <i>circCDR1-AS</i> | miR-562            | 1  |
| <i>circCDR1-AS</i> | miR-5683           | 1  |
| <i>circCDR1-AS</i> | miR-5694           | 1  |
| <i>circCDR1-AS</i> | miR-5697           | 1  |
| <i>circCDR1-AS</i> | miR-571            | 1  |
| <i>circCDR1-AS</i> | miR-573/3616-5p    | 1  |

|                    |                     |    |
|--------------------|---------------------|----|
| <i>circCDR1-AS</i> | miR-575/4676-5p     | 1  |
| <i>circCDR1-AS</i> | miR-576-3p          | 4  |
| <i>circCDR1-AS</i> | miR-578             | 1  |
| <i>circCDR1-AS</i> | miR-602             | 2  |
| <i>circCDR1-AS</i> | miR-6077            | 74 |
| <i>circCDR1-AS</i> | miR-6079            | 68 |
| <i>circCDR1-AS</i> | miR-6089            | 1  |
| <i>circCDR1-AS</i> | miR-6125            | 4  |
| <i>circCDR1-AS</i> | miR-6128            | 43 |
| <i>circCDR1-AS</i> | miR-619-3p          | 7  |
| <i>circCDR1-AS</i> | miR-619-5p/6506-5p  | 1  |
| <i>circCDR1-AS</i> | miR-624-3p          | 2  |
| <i>circCDR1-AS</i> | miR-631/3661        | 8  |
| <i>circCDR1-AS</i> | miR-632/4288        | 1  |
| <i>circCDR1-AS</i> | miR-639             | 1  |
| <i>circCDR1-AS</i> | miR-641/3617-5p     | 29 |
| <i>circCDR1-AS</i> | miR-642-3p          | 4  |
| <i>circCDR1-AS</i> | miR-647             | 1  |
| <i>circCDR1-AS</i> | miR-6502-3p         | 1  |
| <i>circCDR1-AS</i> | miR-6513-5p         | 1  |
| <i>circCDR1-AS</i> | miR-6515-5p         | 1  |
| <i>circCDR1-AS</i> | miR-6516-5p         | 1  |
| <i>circCDR1-AS</i> | miR-655-5p          | 1  |
| <i>circCDR1-AS</i> | miR-659-3p          | 1  |
| <i>circCDR1-AS</i> | miR-665             | 1  |
| <i>circCDR1-AS</i> | miR-671-5p          | 4  |
| <i>circCDR1-AS</i> | miR-6734-5p         | 1  |
| <i>circCDR1-AS</i> | miR-6750-5p/6822-5p | 2  |
| <i>circCDR1-AS</i> | miR-6757-3p         | 5  |
| <i>circCDR1-AS</i> | miR-6759-3p         | 3  |
| <i>circCDR1-AS</i> | miR-676-5p          | 1  |
| <i>circCDR1-AS</i> | miR-6768-5p         | 3  |
| <i>circCDR1-AS</i> | miR-6776-5p         | 1  |
| <i>circCDR1-AS</i> | miR-6779-3p         | 1  |
| <i>circCDR1-AS</i> | miR-6782-3p         | 4  |
| <i>circCDR1-AS</i> | miR-6796-3p         | 1  |
| <i>circCDR1-AS</i> | miR-6799-5p         | 1  |
| <i>circCDR1-AS</i> | miR-6806-5p         | 1  |

|                    |              |    |
|--------------------|--------------|----|
| <i>circCDR1-AS</i> | miR-6807-5p  | 1  |
| <i>circCDR1-AS</i> | miR-6813-3p  | 3  |
| <i>circCDR1-AS</i> | miR-6827-5p  | 1  |
| <i>circCDR1-AS</i> | miR-6828-5p  | 4  |
| <i>circCDR1-AS</i> | miR-6830-5p  | 2  |
| <i>circCDR1-AS</i> | miR-6833-5p  | 3  |
| <i>circCDR1-AS</i> | miR-6834-5p  | 1  |
| <i>circCDR1-AS</i> | miR-6842-3p  | 1  |
| <i>circCDR1-AS</i> | miR-6854-5p  | 1  |
| <i>circCDR1-AS</i> | miR-6857-3p  | 1  |
| <i>circCDR1-AS</i> | miR-6858-3p  | 1  |
| <i>circCDR1-AS</i> | miR-6861-5p  | 1  |
| <i>circCDR1-AS</i> | miR-6863     | 15 |
| <i>circCDR1-AS</i> | miR-6874-5p  | 1  |
| <i>circCDR1-AS</i> | miR-6880-5p  | 3  |
| <i>circCDR1-AS</i> | miR-6882-5p  | 1  |
| <i>circCDR1-AS</i> | miR-6885-3p  | 2  |
| <i>circCDR1-AS</i> | miR-6892-5p  | 1  |
| <i>circCDR1-AS</i> | miR-7-5p     | 74 |
| <i>circCDR1-AS</i> | miR-708-3p   | 1  |
| <i>circCDR1-AS</i> | miR-7106-5p  | 1  |
| <i>circCDR1-AS</i> | miR-7152-5p  | 4  |
| <i>circCDR1-AS</i> | miR-7161-3p  | 3  |
| <i>circCDR1-AS</i> | miR-7847-3p  | 1  |
| <i>circCDR1-AS</i> | miR-7850-5p  | 2  |
| <i>circCDR1-AS</i> | miR-7851-3p  | 7  |
| <i>circCDR1-AS</i> | miR-7856-5p  | 1  |
| <i>circCDR1-AS</i> | miR-7976     | 1  |
| <i>circCDR1-AS</i> | miR-802      | 1  |
| <i>circCDR1-AS</i> | miR-8055     | 1  |
| <i>circCDR1-AS</i> | miR-8056     | 9  |
| <i>circCDR1-AS</i> | miR-8060     | 1  |
| <i>circCDR1-AS</i> | miR-8064     | 1  |
| <i>circCDR1-AS</i> | miR-8071     | 3  |
| <i>circCDR1-AS</i> | miR-8087     | 8  |
| <i>circCDR1-AS</i> | miR-873-5p.1 | 2  |
| <i>circCDR1-AS</i> | miR-876-5p   | 25 |
| <i>circCDR1-AS</i> | miR-887-5p   | 1  |

|                    |                          |   |
|--------------------|--------------------------|---|
| <i>circCDR1-AS</i> | miR-888-3p               | 2 |
| <i>circCDR1-AS</i> | miR-889-5p               | 4 |
| <i>circCDR1-AS</i> | miR-890                  | 3 |
| <i>circCDR1-AS</i> | miR-92a-1-5p             | 1 |
| <i>circCDR1-AS</i> | miR-935                  | 1 |
| <i>circCDR1-AS</i> | miR-941                  | 2 |
| <i>circCDR1-AS</i> | miR-942-3p               | 8 |
| <i>circCDR1-AS</i> | miR-943                  | 5 |
| <i>circCDR1-AS</i> | miR-944                  | 2 |
| <i>circCDR1-AS</i> | miR-9500                 | 2 |
| <i>circCDR1-AS</i> | miR-99-3p                | 1 |
| <i>circCDYL</i>    | miR-10-5p                | 2 |
| <i>circCDYL</i>    | miR-103-3p/107           | 3 |
| <i>circCDYL</i>    | miR-103a-2-5p            | 3 |
| <i>circCDYL</i>    | miR-103b                 | 3 |
| <i>circCDYL</i>    | miR-10b-3p               | 3 |
| <i>circCDYL</i>    | miR-1179                 | 3 |
| <i>circCDYL</i>    | miR-1180-3p              | 6 |
| <i>circCDYL</i>    | miR-1184                 | 2 |
| <i>circCDYL</i>    | miR-1185-5p              | 2 |
| <i>circCDYL</i>    | miR-1200                 | 5 |
| <i>circCDYL</i>    | miR-1205                 | 2 |
| <i>circCDYL</i>    | miR-1207-3p              | 3 |
| <i>circCDYL</i>    | miR-1208                 | 2 |
| <i>circCDYL</i>    | miR-1227-3p              | 2 |
| <i>circCDYL</i>    | miR-1237-3p              | 3 |
| <i>circCDYL</i>    | miR-1238-3p              | 3 |
| <i>circCDYL</i>    | miR-1248                 | 3 |
| <i>circCDYL</i>    | miR-1262/4701-3p/6736-5p | 2 |
| <i>circCDYL</i>    | miR-1266-3p              | 3 |
| <i>circCDYL</i>    | miR-1266-5p/4518         | 2 |
| <i>circCDYL</i>    | miR-1267                 | 6 |
| <i>circCDYL</i>    | miR-1270                 | 6 |
| <i>circCDYL</i>    | miR-1273f                | 3 |
| <i>circCDYL</i>    | miR-1273g-3p             | 4 |
| <i>circCDYL</i>    | miR-128-1-5p             | 2 |
| <i>circCDYL</i>    | miR-128-3p               | 3 |
| <i>circCDYL</i>    | miR-1287-5p              | 3 |

|                 |                     |   |
|-----------------|---------------------|---|
| <i>circCDYL</i> | miR-129-5p          | 3 |
| <i>circCDYL</i> | miR-1291/6775-3p    | 2 |
| <i>circCDYL</i> | miR-1296-3p         | 2 |
| <i>circCDYL</i> | miR-1298-3p         | 3 |
| <i>circCDYL</i> | miR-1299            | 3 |
| <i>circCDYL</i> | miR-1305            | 2 |
| <i>circCDYL</i> | miR-1307-3p         | 2 |
| <i>circCDYL</i> | miR-1307-5p         | 2 |
| <i>circCDYL</i> | miR-1343-3p         | 4 |
| <i>circCDYL</i> | miR-135-5p          | 1 |
| <i>circCDYL</i> | miR-139-3p          | 3 |
| <i>circCDYL</i> | miR-141-5p          | 9 |
| <i>circCDYL</i> | miR-143-3p          | 3 |
| <i>circCDYL</i> | miR-143-5p          | 2 |
| <i>circCDYL</i> | miR-145-3p          | 3 |
| <i>circCDYL</i> | miR-145-5p          | 2 |
| <i>circCDYL</i> | miR-149-5p          | 6 |
| <i>circCDYL</i> | miR-150-5p          | 3 |
| <i>circCDYL</i> | miR-151-5p          | 2 |
| <i>circCDYL</i> | miR-15a-3p          | 1 |
| <i>circCDYL</i> | miR-17-3p           | 2 |
| <i>circCDYL</i> | miR-181a-2-3p       | 2 |
| <i>circCDYL</i> | miR-181d-3p         | 3 |
| <i>circCDYL</i> | miR-1827            | 2 |
| <i>circCDYL</i> | miR-185-3p          | 3 |
| <i>circCDYL</i> | miR-185-5p          | 9 |
| <i>circCDYL</i> | miR-1909-5p         | 3 |
| <i>circCDYL</i> | miR-1914-5p         | 1 |
| <i>circCDYL</i> | miR-1976            | 2 |
| <i>circCDYL</i> | miR-198             | 2 |
| <i>circCDYL</i> | miR-200-3p/429      | 3 |
| <i>circCDYL</i> | miR-200c-5p/550a-3p | 3 |
| <i>circCDYL</i> | miR-202-5p          | 3 |
| <i>circCDYL</i> | miR-203b-3p         | 3 |
| <i>circCDYL</i> | miR-204-5p/211-5p   | 3 |
| <i>circCDYL</i> | miR-2116-3p         | 3 |
| <i>circCDYL</i> | miR-2116-5p         | 6 |
| <i>circCDYL</i> | miR-214-5p          | 1 |



|                 |                                              |   |
|-----------------|----------------------------------------------|---|
| <i>circCDYL</i> | miR-215-3p                                   | 3 |
| <i>circCDYL</i> | miR-218-5p                                   | 3 |
| <i>circCDYL</i> | miR-22-5p                                    | 6 |
| <i>circCDYL</i> | miR-221-5p/8073                              | 2 |
| <i>circCDYL</i> | miR-223-5p                                   | 3 |
| <i>circCDYL</i> | miR-2276-5p                                  | 2 |
| <i>circCDYL</i> | miR-2355-5p                                  | 2 |
| <i>circCDYL</i> | miR-2392                                     | 3 |
| <i>circCDYL</i> | miR-26b-3p                                   | 3 |
| <i>circCDYL</i> | miR-27-3p                                    | 5 |
| <i>circCDYL</i> | miR-27a-5p                                   | 2 |
| <i>circCDYL</i> | miR-2861                                     | 2 |
| <i>circCDYL</i> | miR-296-5p                                   | 2 |
| <i>circCDYL</i> | miR-301a-5p/301b-5p                          | 2 |
| <i>circCDYL</i> | miR-302c-5p                                  | 1 |
| <i>circCDYL</i> | miR-3064-5p                                  | 3 |
| <i>circCDYL</i> | miR-3065-5p                                  | 2 |
| <i>circCDYL</i> | miR-3074-5p                                  | 3 |
| <i>circCDYL</i> | miR-30b-3p/1273h-5p/3689-3p/6779-5p/6780a-5p | 3 |
| <i>circCDYL</i> | miR-30c-3p/6788-5p                           | 3 |
| <i>circCDYL</i> | miR-3119                                     | 4 |
| <i>circCDYL</i> | miR-3120-5p                                  | 3 |
| <i>circCDYL</i> | miR-3122/3913-5p                             | 3 |
| <i>circCDYL</i> | miR-3124-3p                                  | 7 |
| <i>circCDYL</i> | miR-3126-3p                                  | 3 |
| <i>circCDYL</i> | miR-3127-5p                                  | 2 |
| <i>circCDYL</i> | miR-3128                                     | 3 |
| <i>circCDYL</i> | miR-3134                                     | 3 |
| <i>circCDYL</i> | miR-3135b                                    | 3 |
| <i>circCDYL</i> | miR-3136-3p/7155-3p                          | 2 |
| <i>circCDYL</i> | miR-3140-3p                                  | 4 |
| <i>circCDYL</i> | miR-3140-5p                                  | 3 |
| <i>circCDYL</i> | miR-3147                                     | 3 |
| <i>circCDYL</i> | miR-3158-3p                                  | 2 |
| <i>circCDYL</i> | miR-3158-5p                                  | 2 |
| <i>circCDYL</i> | miR-3160-3p                                  | 3 |
| <i>circCDYL</i> | miR-3165                                     | 3 |
| <i>circCDYL</i> | miR-3171                                     | 3 |

|                 |                           |   |
|-----------------|---------------------------|---|
| <i>circCDYL</i> | miR-3176/3922-3p          | 2 |
| <i>circCDYL</i> | miR-3182                  | 6 |
| <i>circCDYL</i> | miR-3183/4723-3p/6769b-3p | 2 |
| <i>circCDYL</i> | miR-3187-3p               | 1 |
| <i>circCDYL</i> | miR-3190-5p               | 2 |
| <i>circCDYL</i> | miR-3193                  | 2 |
| <i>circCDYL</i> | miR-3194-3p               | 2 |
| <i>circCDYL</i> | miR-320                   | 2 |
| <i>circCDYL</i> | miR-323b-3p               | 2 |
| <i>circCDYL</i> | miR-328-3p                | 2 |
| <i>circCDYL</i> | miR-337-5p                | 3 |
| <i>circCDYL</i> | miR-33b-3p/515-3p/519e-3p | 3 |
| <i>circCDYL</i> | miR-342-3p                | 3 |
| <i>circCDYL</i> | miR-345-3p                | 3 |
| <i>circCDYL</i> | miR-3605-3p               | 3 |
| <i>circCDYL</i> | miR-3605-5p               | 2 |
| <i>circCDYL</i> | miR-3614-3p               | 3 |
| <i>circCDYL</i> | miR-3615                  | 4 |
| <i>circCDYL</i> | miR-362-5p/500b-5p        | 2 |
| <i>circCDYL</i> | miR-3622a-3p/3622b-3p     | 2 |
| <i>circCDYL</i> | miR-3622a-5p              | 4 |
| <i>circCDYL</i> | miR-3651                  | 3 |
| <i>circCDYL</i> | miR-3652/4430             | 6 |
| <i>circCDYL</i> | miR-3653-5p               | 2 |
| <i>circCDYL</i> | miR-3657                  | 2 |
| <i>circCDYL</i> | miR-3663-5p               | 3 |
| <i>circCDYL</i> | miR-3664-3p               | 2 |
| <i>circCDYL</i> | miR-3664-5p               | 3 |
| <i>circCDYL</i> | miR-367-5p                | 6 |
| <i>circCDYL</i> | miR-3677-3p               | 6 |
| <i>circCDYL</i> | miR-3685                  | 3 |
| <i>circCDYL</i> | miR-3691-3p               | 3 |
| <i>circCDYL</i> | miR-3691-5p               | 6 |
| <i>circCDYL</i> | miR-3692-3p               | 3 |
| <i>circCDYL</i> | miR-370-3p                | 6 |
| <i>circCDYL</i> | miR-3713                  | 2 |
| <i>circCDYL</i> | miR-371a-3p               | 3 |
| <i>circCDYL</i> | miR-371b-3p               | 3 |

|                 |                  |   |
|-----------------|------------------|---|
| <i>circCDYL</i> | miR-375          | 6 |
| <i>circCDYL</i> | miR-376-3p       | 3 |
| <i>circCDYL</i> | miR-378a-5p      | 5 |
| <i>circCDYL</i> | miR-378g         | 2 |
| <i>circCDYL</i> | miR-382-5p       | 3 |
| <i>circCDYL</i> | miR-384          | 3 |
| <i>circCDYL</i> | miR-3907         | 3 |
| <i>circCDYL</i> | miR-3909         | 5 |
| <i>circCDYL</i> | miR-3911         | 3 |
| <i>circCDYL</i> | miR-3918         | 4 |
| <i>circCDYL</i> | miR-3921/4653-5p | 2 |
| <i>circCDYL</i> | miR-3923         | 2 |
| <i>circCDYL</i> | miR-3977         | 3 |
| <i>circCDYL</i> | miR-421          | 2 |
| <i>circCDYL</i> | miR-4252         | 4 |
| <i>circCDYL</i> | miR-4266         | 3 |
| <i>circCDYL</i> | miR-4273/7156-5p | 9 |
| <i>circCDYL</i> | miR-4277         | 3 |
| <i>circCDYL</i> | miR-4279         | 3 |
| <i>circCDYL</i> | miR-4283         | 2 |
| <i>circCDYL</i> | miR-4289         | 3 |
| <i>circCDYL</i> | miR-4290         | 2 |
| <i>circCDYL</i> | miR-4293         | 1 |
| <i>circCDYL</i> | miR-4318         | 2 |
| <i>circCDYL</i> | miR-432-3p       | 3 |
| <i>circCDYL</i> | miR-4320         | 3 |
| <i>circCDYL</i> | miR-4324         | 2 |
| <i>circCDYL</i> | miR-4328         | 2 |
| <i>circCDYL</i> | miR-4423-3p      | 2 |
| <i>circCDYL</i> | miR-4425         | 3 |
| <i>circCDYL</i> | miR-4435         | 1 |
| <i>circCDYL</i> | miR-4436b-5p     | 2 |
| <i>circCDYL</i> | miR-4437         | 2 |
| <i>circCDYL</i> | miR-4440         | 3 |
| <i>circCDYL</i> | miR-4446-3p      | 2 |
| <i>circCDYL</i> | miR-4446-5p      | 4 |
| <i>circCDYL</i> | miR-4455         | 2 |
| <i>circCDYL</i> | miR-4460         | 2 |

|                 |                             |   |
|-----------------|-----------------------------|---|
| <i>circCDYL</i> | miR-4474-3p                 | 4 |
| <i>circCDYL</i> | miR-4486                    | 2 |
| <i>circCDYL</i> | miR-4487                    | 3 |
| <i>circCDYL</i> | miR-4489                    | 2 |
| <i>circCDYL</i> | miR-4505/5787               | 6 |
| <i>circCDYL</i> | miR-4508                    | 4 |
| <i>circCDYL</i> | miR-450a-1-3p               | 3 |
| <i>circCDYL</i> | miR-4512                    | 2 |
| <i>circCDYL</i> | miR-4529-5p                 | 1 |
| <i>circCDYL</i> | miR-4531                    | 6 |
| <i>circCDYL</i> | miR-4534/8082               | 3 |
| <i>circCDYL</i> | miR-4539                    | 3 |
| <i>circCDYL</i> | miR-455-3p.2                | 2 |
| <i>circCDYL</i> | miR-455-5p                  | 3 |
| <i>circCDYL</i> | miR-4633-3p/6500-5p         | 3 |
| <i>circCDYL</i> | miR-4638-5p                 | 2 |
| <i>circCDYL</i> | miR-4649-3p                 | 2 |
| <i>circCDYL</i> | miR-4655-5p                 | 2 |
| <i>circCDYL</i> | miR-4659a-3p/4659b-3p       | 6 |
| <i>circCDYL</i> | miR-4661-3p                 | 2 |
| <i>circCDYL</i> | miR-4664-3p                 | 6 |
| <i>circCDYL</i> | miR-4669                    | 2 |
| <i>circCDYL</i> | miR-4677-5p                 | 9 |
| <i>circCDYL</i> | miR-4683                    | 3 |
| <i>circCDYL</i> | miR-4687-3p                 | 3 |
| <i>circCDYL</i> | miR-4691-5p/6792-3p         | 2 |
| <i>circCDYL</i> | miR-4704-3p                 | 2 |
| <i>circCDYL</i> | miR-4705                    | 3 |
| <i>circCDYL</i> | miR-4708-5p                 | 3 |
| <i>circCDYL</i> | miR-4714-5p                 | 3 |
| <i>circCDYL</i> | miR-4715-3p                 | 4 |
| <i>circCDYL</i> | miR-4716-5p                 | 3 |
| <i>circCDYL</i> | miR-4720-5p/4799-3p/5588-5p | 3 |
| <i>circCDYL</i> | miR-4725-5p                 | 2 |
| <i>circCDYL</i> | miR-4727-3p                 | 2 |
| <i>circCDYL</i> | miR-4734                    | 2 |
| <i>circCDYL</i> | miR-4743-5p                 | 2 |
| <i>circCDYL</i> | miR-4746-5p                 | 2 |

|                 |                      |   |
|-----------------|----------------------|---|
| <i>circCDYL</i> | miR-4750-3p          | 2 |
| <i>circCDYL</i> | miR-4755-5p/5006-3p  | 3 |
| <i>circCDYL</i> | miR-4763-5p          | 2 |
| <i>circCDYL</i> | miR-4764-5p          | 3 |
| <i>circCDYL</i> | miR-4766-5p          | 2 |
| <i>circCDYL</i> | miR-4769-3p/6817-5p  | 2 |
| <i>circCDYL</i> | miR-4782-5p/5706     | 3 |
| <i>circCDYL</i> | miR-4793-5p          | 2 |
| <i>circCDYL</i> | miR-4802-5p          | 3 |
| <i>circCDYL</i> | miR-488-3p           | 2 |
| <i>circCDYL</i> | miR-495-5p           | 3 |
| <i>circCDYL</i> | miR-5000-5p          | 3 |
| <i>circCDYL</i> | miR-5004-3p          | 3 |
| <i>circCDYL</i> | miR-500a-5p          | 2 |
| <i>circCDYL</i> | miR-501-5p           | 2 |
| <i>circCDYL</i> | miR-504-3p           | 3 |
| <i>circCDYL</i> | miR-504-5p.1         | 2 |
| <i>circCDYL</i> | miR-505-3p.1         | 2 |
| <i>circCDYL</i> | miR-505-3p.2         | 2 |
| <i>circCDYL</i> | miR-5088-5p          | 2 |
| <i>circCDYL</i> | miR-5090/6775-5p     | 4 |
| <i>circCDYL</i> | miR-511-5p           | 3 |
| <i>circCDYL</i> | miR-513a-5p          | 5 |
| <i>circCDYL</i> | miR-514a-5p          | 3 |
| <i>circCDYL</i> | miR-516b-5p          | 3 |
| <i>circCDYL</i> | miR-5186             | 3 |
| <i>circCDYL</i> | miR-5192             | 9 |
| <i>circCDYL</i> | miR-5193             | 2 |
| <i>circCDYL</i> | miR-5196-3p          | 2 |
| <i>circCDYL</i> | miR-526b-5p          | 3 |
| <i>circCDYL</i> | miR-532-3p           | 3 |
| <i>circCDYL</i> | miR-544a             | 3 |
| <i>circCDYL</i> | miR-544b             | 2 |
| <i>circCDYL</i> | miR-545-3p           | 2 |
| <i>circCDYL</i> | miR-548at-5p         | 3 |
| <i>circCDYL</i> | miR-548az-5p/548t-5p | 3 |
| <i>circCDYL</i> | miR-548n             | 3 |
| <i>circCDYL</i> | miR-548p             | 3 |

|                 |                                      |   |
|-----------------|--------------------------------------|---|
| <i>circCDYL</i> | miR-548s                             | 1 |
| <i>circCDYL</i> | miR-550a-3-5p/550a-5p/1271-3p        | 3 |
| <i>circCDYL</i> | miR-5571-3p                          | 3 |
| <i>circCDYL</i> | miR-558                              | 3 |
| <i>circCDYL</i> | miR-5580-5p                          | 6 |
| <i>circCDYL</i> | miR-5581-3p                          | 3 |
| <i>circCDYL</i> | miR-5582-5p                          | 4 |
| <i>circCDYL</i> | miR-5587-5p                          | 3 |
| <i>circCDYL</i> | miR-561-3p                           | 3 |
| <i>circCDYL</i> | miR-564                              | 2 |
| <i>circCDYL</i> | miR-5690                             | 1 |
| <i>circCDYL</i> | miR-5691                             | 5 |
| <i>circCDYL</i> | miR-572                              | 2 |
| <i>circCDYL</i> | miR-573/3616-5p                      | 3 |
| <i>circCDYL</i> | miR-588                              | 1 |
| <i>circCDYL</i> | miR-593-5p                           | 4 |
| <i>circCDYL</i> | miR-595                              | 3 |
| <i>circCDYL</i> | miR-596                              | 1 |
| <i>circCDYL</i> | miR-604                              | 1 |
| <i>circCDYL</i> | miR-6071                             | 3 |
| <i>circCDYL</i> | miR-6080                             | 2 |
| <i>circCDYL</i> | miR-609                              | 2 |
| <i>circCDYL</i> | miR-611/3131                         | 2 |
| <i>circCDYL</i> | miR-612/1285-3p/3187-5p/5189-5p/6860 | 2 |
| <i>circCDYL</i> | miR-6134                             | 3 |
| <i>circCDYL</i> | miR-615-5p                           | 2 |
| <i>circCDYL</i> | miR-617                              | 3 |
| <i>circCDYL</i> | miR-623                              | 3 |
| <i>circCDYL</i> | miR-626/6876-3p                      | 3 |
| <i>circCDYL</i> | miR-627-3p                           | 2 |
| <i>circCDYL</i> | miR-629-3p                           | 3 |
| <i>circCDYL</i> | miR-630                              | 3 |
| <i>circCDYL</i> | miR-639                              | 3 |
| <i>circCDYL</i> | miR-644a                             | 3 |
| <i>circCDYL</i> | miR-647                              | 7 |
| <i>circCDYL</i> | miR-6505-3p                          | 3 |
| <i>circCDYL</i> | miR-6509-3p                          | 2 |
| <i>circCDYL</i> | miR-651-5p                           | 3 |

|                 |                     |   |
|-----------------|---------------------|---|
| <i>circCDYL</i> | miR-6513-3p         | 3 |
| <i>circCDYL</i> | miR-6513-5p         | 3 |
| <i>circCDYL</i> | miR-6514-5p         | 3 |
| <i>circCDYL</i> | miR-660-3p          | 2 |
| <i>circCDYL</i> | miR-663b            | 1 |
| <i>circCDYL</i> | miR-664a-5p/4794    | 6 |
| <i>circCDYL</i> | miR-670-3p          | 3 |
| <i>circCDYL</i> | miR-6716-3p         | 3 |
| <i>circCDYL</i> | miR-6724-5p/6773-5p | 2 |
| <i>circCDYL</i> | miR-6731-5p/8085    | 3 |
| <i>circCDYL</i> | miR-6735-3p         | 2 |
| <i>circCDYL</i> | miR-6738-3p         | 3 |
| <i>circCDYL</i> | miR-6739-3p         | 3 |
| <i>circCDYL</i> | miR-6740-3p         | 3 |
| <i>circCDYL</i> | miR-6741-3p         | 3 |
| <i>circCDYL</i> | miR-6741-5p         | 2 |
| <i>circCDYL</i> | miR-6742-3p         | 2 |
| <i>circCDYL</i> | miR-6748-5p         | 2 |
| <i>circCDYL</i> | miR-6749-3p         | 2 |
| <i>circCDYL</i> | miR-6752-3p         | 2 |
| <i>circCDYL</i> | miR-6758-5p/6856-5p | 3 |
| <i>circCDYL</i> | miR-676-3p          | 2 |
| <i>circCDYL</i> | miR-6760-3p         | 2 |
| <i>circCDYL</i> | miR-6762-3p         | 1 |
| <i>circCDYL</i> | miR-6762-5p/6845-5p | 2 |
| <i>circCDYL</i> | miR-6765-3p         | 2 |
| <i>circCDYL</i> | miR-6765-5p         | 2 |
| <i>circCDYL</i> | miR-6772-3p         | 2 |
| <i>circCDYL</i> | miR-6772-5p         | 2 |
| <i>circCDYL</i> | miR-6773-3p         | 3 |
| <i>circCDYL</i> | miR-6781-5p         | 2 |
| <i>circCDYL</i> | miR-6784-5p         | 2 |
| <i>circCDYL</i> | miR-6793-5p         | 2 |
| <i>circCDYL</i> | miR-6796-3p         | 2 |
| <i>circCDYL</i> | miR-6804-3p         | 2 |
| <i>circCDYL</i> | miR-6811-3p         | 1 |
| <i>circCDYL</i> | miR-6812-3p         | 2 |
| <i>circCDYL</i> | miR-6814-5p         | 3 |

|                 |                     |   |
|-----------------|---------------------|---|
| <i>circCDYL</i> | miR-6822-3p         | 2 |
| <i>circCDYL</i> | miR-6828-3p         | 3 |
| <i>circCDYL</i> | miR-6830-3p         | 3 |
| <i>circCDYL</i> | miR-6832-3p         | 3 |
| <i>circCDYL</i> | miR-6842-3p         | 7 |
| <i>circCDYL</i> | miR-6843-3p/6848-3p | 3 |
| <i>circCDYL</i> | miR-6845-3p         | 3 |
| <i>circCDYL</i> | miR-6851-3p         | 2 |
| <i>circCDYL</i> | miR-6852-5p         | 2 |
| <i>circCDYL</i> | miR-6868-3p         | 3 |
| <i>circCDYL</i> | miR-6868-5p         | 3 |
| <i>circCDYL</i> | miR-6874-5p         | 3 |
| <i>circCDYL</i> | miR-6875-3p         | 6 |
| <i>circCDYL</i> | miR-6877-5p         | 2 |
| <i>circCDYL</i> | miR-6878-5p         | 3 |
| <i>circCDYL</i> | miR-6880-5p         | 3 |
| <i>circCDYL</i> | miR-6882-3p         | 2 |
| <i>circCDYL</i> | miR-6888-3p         | 3 |
| <i>circCDYL</i> | miR-6888-5p         | 3 |
| <i>circCDYL</i> | miR-6890-3p         | 2 |
| <i>circCDYL</i> | miR-6892-3p         | 2 |
| <i>circCDYL</i> | miR-6895-5p         | 2 |
| <i>circCDYL</i> | miR-7106-3p         | 5 |
| <i>circCDYL</i> | miR-7108-5p         | 4 |
| <i>circCDYL</i> | miR-7109-3p         | 1 |
| <i>circCDYL</i> | miR-7112-5p         | 2 |
| <i>circCDYL</i> | miR-7114-5p         | 1 |
| <i>circCDYL</i> | miR-7150            | 3 |
| <i>circCDYL</i> | miR-7152-3p         | 3 |
| <i>circCDYL</i> | miR-7152-5p         | 3 |
| <i>circCDYL</i> | miR-7158-3p         | 3 |
| <i>circCDYL</i> | miR-7159-5p         | 2 |
| <i>circCDYL</i> | miR-7160-3p         | 2 |
| <i>circCDYL</i> | miR-7162-3p         | 2 |
| <i>circCDYL</i> | miR-718             | 2 |
| <i>circCDYL</i> | miR-760             | 2 |
| <i>circCDYL</i> | miR-764             | 3 |
| <i>circCDYL</i> | miR-767-3p          | 6 |



|                 |                     |   |
|-----------------|---------------------|---|
| <i>circCDYL</i> | miR-7704            | 2 |
| <i>circCDYL</i> | miR-7850-5p         | 3 |
| <i>circCDYL</i> | miR-7854-3p         | 3 |
| <i>circCDYL</i> | miR-7974            | 3 |
| <i>circCDYL</i> | miR-7975            | 3 |
| <i>circCDYL</i> | miR-8056            | 6 |
| <i>circCDYL</i> | miR-8066            | 3 |
| <i>circCDYL</i> | miR-8068            | 3 |
| <i>circCDYL</i> | miR-8071            | 3 |
| <i>circCDYL</i> | miR-8084            | 3 |
| <i>circCDYL</i> | miR-877-3p          | 5 |
| <i>circCDYL</i> | miR-885-3p          | 3 |
| <i>circCDYL</i> | miR-887-5p          | 3 |
| <i>circCDYL</i> | miR-889-5p          | 1 |
| <i>circCDYL</i> | miR-892a            | 2 |
| <i>circCDYL</i> | miR-9-3p            | 2 |
| <i>circCDYL</i> | miR-935             | 2 |
| <i>circCDYL</i> | miR-939-3p          | 2 |
| <i>circCDYL</i> | miR-95-5p           | 2 |
| <i>circCDYL</i> | miR-99-3p           | 2 |
| <i>circCDYL</i> | miR-101-5p          | 1 |
| <i>circCDYL</i> | miR-1178-3p         | 1 |
| <i>circCDYL</i> | miR-1199-3p         | 1 |
| <i>circCDYL</i> | miR-1199-5p/6751-3p | 1 |
| <i>circCDYL</i> | miR-1224-5p         | 1 |
| <i>circCDYL</i> | miR-1231            | 1 |
| <i>circCDYL</i> | miR-1236-3p         | 1 |
| <i>circCDYL</i> | miR-1245b-3p        | 1 |
| <i>circCDYL</i> | miR-1250-3p         | 1 |
| <i>circCDYL</i> | miR-1261            | 1 |
| <i>circCDYL</i> | miR-1269            | 1 |
| <i>circCDYL</i> | miR-127-5p          | 1 |
| <i>circCDYL</i> | miR-1290            | 1 |
| <i>circCDYL</i> | miR-130b-5p         | 1 |
| <i>circCDYL</i> | miR-133a-5p         | 1 |
| <i>circCDYL</i> | miR-134-3p          | 1 |
| <i>circCDYL</i> | miR-135b-3p         | 1 |
| <i>circCDYL</i> | miR-136-3p          | 1 |

|                 |                           |   |
|-----------------|---------------------------|---|
| <i>circCDYL</i> | miR-138-5p                | 1 |
| <i>circCDYL</i> | miR-140-3p.2              | 1 |
| <i>circCDYL</i> | miR-155-5p                | 1 |
| <i>circCDYL</i> | miR-16-2-3p/195-3p        | 1 |
| <i>circCDYL</i> | miR-1908-3p               | 1 |
| <i>circCDYL</i> | miR-192-3p                | 1 |
| <i>circCDYL</i> | miR-194-5p                | 1 |
| <i>circCDYL</i> | miR-1973                  | 1 |
| <i>circCDYL</i> | miR-2053                  | 1 |
| <i>circCDYL</i> | miR-20b-3p                | 1 |
| <i>circCDYL</i> | miR-2113                  | 1 |
| <i>circCDYL</i> | miR-2115-5p               | 1 |
| <i>circCDYL</i> | miR-219b-5p               | 1 |
| <i>circCDYL</i> | miR-224-5p                | 1 |
| <i>circCDYL</i> | miR-2278                  | 1 |
| <i>circCDYL</i> | miR-2355-3p               | 1 |
| <i>circCDYL</i> | miR-26-5p                 | 1 |
| <i>circCDYL</i> | miR-297                   | 1 |
| <i>circCDYL</i> | miR-299-3p                | 1 |
| <i>circCDYL</i> | miR-302c-3p.2/520-3p      | 1 |
| <i>circCDYL</i> | miR-3137                  | 1 |
| <i>circCDYL</i> | miR-3152-5p               | 1 |
| <i>circCDYL</i> | miR-3160-5p               | 1 |
| <i>circCDYL</i> | miR-3163                  | 1 |
| <i>circCDYL</i> | miR-3169                  | 1 |
| <i>circCDYL</i> | miR-3174                  | 1 |
| <i>circCDYL</i> | miR-3191-5p               | 2 |
| <i>circCDYL</i> | miR-323b-5p/410-5p/494-5p | 1 |
| <i>circCDYL</i> | miR-324-5p                | 1 |
| <i>circCDYL</i> | miR-326                   | 2 |
| <i>circCDYL</i> | miR-338-5p                | 1 |
| <i>circCDYL</i> | miR-34-5p/449-5p          | 1 |
| <i>circCDYL</i> | miR-340-5p                | 1 |
| <i>circCDYL</i> | miR-3529-3p               | 1 |
| <i>circCDYL</i> | miR-3591-5p               | 2 |
| <i>circCDYL</i> | miR-3606-5p               | 1 |
| <i>circCDYL</i> | miR-3620-3p               | 1 |
| <i>circCDYL</i> | miR-3655                  | 1 |

|                 |                       |   |
|-----------------|-----------------------|---|
| <i>circCDYL</i> | miR-3663-3p           | 1 |
| <i>circCDYL</i> | miR-3675-3p           | 1 |
| <i>circCDYL</i> | miR-3686              | 3 |
| <i>circCDYL</i> | miR-376b-5p/376c-5p   | 1 |
| <i>circCDYL</i> | miR-378-3p            | 1 |
| <i>circCDYL</i> | miR-378j/6839-5p      | 1 |
| <i>circCDYL</i> | miR-3912-3p           | 1 |
| <i>circCDYL</i> | miR-3915              | 1 |
| <i>circCDYL</i> | miR-3929/4419b/4478   | 1 |
| <i>circCDYL</i> | miR-3934-3p           | 1 |
| <i>circCDYL</i> | miR-409-3p            | 1 |
| <i>circCDYL</i> | miR-411-3p            | 1 |
| <i>circCDYL</i> | miR-4265/4296/4322    | 1 |
| <i>circCDYL</i> | miR-4267              | 1 |
| <i>circCDYL</i> | miR-4274              | 1 |
| <i>circCDYL</i> | miR-4303              | 1 |
| <i>circCDYL</i> | miR-4327              | 1 |
| <i>circCDYL</i> | miR-4330              | 1 |
| <i>circCDYL</i> | miR-4421/5699-3p      | 1 |
| <i>circCDYL</i> | miR-4424              | 1 |
| <i>circCDYL</i> | miR-4426/4647/4662b   | 1 |
| <i>circCDYL</i> | miR-4433a-5p          | 1 |
| <i>circCDYL</i> | miR-4433b-5p          | 1 |
| <i>circCDYL</i> | miR-4453/4538         | 1 |
| <i>circCDYL</i> | miR-4468              | 1 |
| <i>circCDYL</i> | miR-4473              | 1 |
| <i>circCDYL</i> | miR-4484              | 1 |
| <i>circCDYL</i> | miR-4485-3p           | 1 |
| <i>circCDYL</i> | miR-4491/4657         | 1 |
| <i>circCDYL</i> | miR-4519              | 1 |
| <i>circCDYL</i> | miR-452-3p            | 1 |
| <i>circCDYL</i> | miR-4638-3p           | 1 |
| <i>circCDYL</i> | miR-4639-3p           | 1 |
| <i>circCDYL</i> | miR-4646-3p           | 1 |
| <i>circCDYL</i> | miR-4652-3p           | 2 |
| <i>circCDYL</i> | miR-4659a-5p/4659b-5p | 1 |
| <i>circCDYL</i> | miR-4663              | 1 |
| <i>circCDYL</i> | miR-4671-3p           | 1 |

|                 |                             |   |
|-----------------|-----------------------------|---|
| <i>circCDYL</i> | miR-4689/6858-5p            | 1 |
| <i>circCDYL</i> | miR-4709-5p                 | 1 |
| <i>circCDYL</i> | miR-4727-5p                 | 1 |
| <i>circCDYL</i> | miR-4742-3p                 | 2 |
| <i>circCDYL</i> | miR-4743-3p                 | 2 |
| <i>circCDYL</i> | miR-4751                    | 1 |
| <i>circCDYL</i> | miR-4752                    | 1 |
| <i>circCDYL</i> | miR-4753-3p                 | 2 |
| <i>circCDYL</i> | miR-4759                    | 1 |
| <i>circCDYL</i> | miR-4768-5p/6833-3p         | 3 |
| <i>circCDYL</i> | miR-4774-3p                 | 1 |
| <i>circCDYL</i> | miR-4777-3p                 | 1 |
| <i>circCDYL</i> | miR-4781-3p                 | 1 |
| <i>circCDYL</i> | miR-4786-3p                 | 1 |
| <i>circCDYL</i> | miR-4790-5p                 | 1 |
| <i>circCDYL</i> | miR-483-3p.1                | 1 |
| <i>circCDYL</i> | miR-483-3p.2                | 1 |
| <i>circCDYL</i> | miR-486-5p                  | 1 |
| <i>circCDYL</i> | miR-489-5p                  | 1 |
| <i>circCDYL</i> | miR-5001-3p                 | 1 |
| <i>circCDYL</i> | miR-5003-5p                 | 1 |
| <i>circCDYL</i> | miR-5004-5p                 | 1 |
| <i>circCDYL</i> | miR-5009-5p/8058            | 1 |
| <i>circCDYL</i> | miR-5010-3p                 | 1 |
| <i>circCDYL</i> | miR-512-3p                  | 1 |
| <i>circCDYL</i> | miR-513a-3p/513c-3p/3606-3p | 1 |
| <i>circCDYL</i> | miR-516a-3p/516b-3p/7162-5p | 1 |
| <i>circCDYL</i> | miR-5189-3p                 | 1 |
| <i>circCDYL</i> | miR-518c-5p                 | 2 |
| <i>circCDYL</i> | miR-5197-3p                 | 1 |
| <i>circCDYL</i> | miR-548an                   | 1 |
| <i>circCDYL</i> | miR-548au-3p                | 1 |
| <i>circCDYL</i> | miR-5579-3p                 | 1 |
| <i>circCDYL</i> | miR-5590-5p                 | 1 |
| <i>circCDYL</i> | miR-567                     | 1 |
| <i>circCDYL</i> | miR-5683                    | 1 |
| <i>circCDYL</i> | miR-569                     | 1 |
| <i>circCDYL</i> | miR-5692a                   | 2 |

|                 |                     |   |
|-----------------|---------------------|---|
| <i>circCDYL</i> | miR-5700            | 1 |
| <i>circCDYL</i> | miR-576-3p          | 2 |
| <i>circCDYL</i> | miR-586             | 1 |
| <i>circCDYL</i> | miR-593-3p          | 1 |
| <i>circCDYL</i> | miR-6131            | 1 |
| <i>circCDYL</i> | miR-624-5p          | 1 |
| <i>circCDYL</i> | miR-632/4288        | 1 |
| <i>circCDYL</i> | miR-634             | 1 |
| <i>circCDYL</i> | miR-636             | 1 |
| <i>circCDYL</i> | miR-6501-3p         | 1 |
| <i>circCDYL</i> | miR-6507-3p         | 1 |
| <i>circCDYL</i> | miR-6515-3p         | 1 |
| <i>circCDYL</i> | miR-653-5p          | 1 |
| <i>circCDYL</i> | miR-654-3p          | 1 |
| <i>circCDYL</i> | miR-659-3p          | 1 |
| <i>circCDYL</i> | miR-668-3p          | 1 |
| <i>circCDYL</i> | miR-6748-3p         | 1 |
| <i>circCDYL</i> | miR-675-3p          | 1 |
| <i>circCDYL</i> | miR-6755-3p         | 1 |
| <i>circCDYL</i> | miR-6758-3p         | 1 |
| <i>circCDYL</i> | miR-6759-5p         | 1 |
| <i>circCDYL</i> | miR-6764-3p/6824-3p | 2 |
| <i>circCDYL</i> | miR-6768-3p         | 1 |
| <i>circCDYL</i> | miR-6794-3p         | 1 |
| <i>circCDYL</i> | miR-6796-5p         | 1 |
| <i>circCDYL</i> | miR-6800-3p         | 1 |
| <i>circCDYL</i> | miR-6806-5p         | 1 |
| <i>circCDYL</i> | miR-6809-3p         | 3 |
| <i>circCDYL</i> | miR-6825-3p         | 2 |
| <i>circCDYL</i> | miR-6833-5p         | 1 |
| <i>circCDYL</i> | miR-6836-3p         | 1 |
| <i>circCDYL</i> | miR-6863            | 1 |
| <i>circCDYL</i> | miR-6873-3p         | 1 |
| <i>circCDYL</i> | miR-6885-3p         | 1 |
| <i>circCDYL</i> | miR-6895-3p         | 1 |
| <i>circCDYL</i> | miR-7-3p            | 1 |
| <i>circCDYL</i> | miR-7160-5p         | 1 |
| <i>circCDYL</i> | miR-7705            | 1 |

|                   |                                     |   |
|-------------------|-------------------------------------|---|
| <i>circCDYL</i>   | miR-7843-3p                         | 1 |
| <i>circCDYL</i>   | miR-8077                            | 1 |
| <i>circCDYL</i>   | miR-8083                            | 1 |
| <i>circCDYL</i>   | miR-875-5p                          | 1 |
| <i>circCDYL</i>   | miR-876-5p                          | 1 |
| <i>circCDYL</i>   | miR-921                             | 1 |
| <i>circCDYL</i>   | miR-942-5p                          | 3 |
| <i>circCOL4A5</i> | miR-1-3p/206                        | 1 |
| <i>circCOL4A5</i> | miR-1185-5p                         | 1 |
| <i>circCOL4A5</i> | miR-1202/3972                       | 1 |
| <i>circCOL4A5</i> | miR-122-5p                          | 1 |
| <i>circCOL4A5</i> | miR-1224-5p                         | 1 |
| <i>circCOL4A5</i> | miR-1226-3p                         | 3 |
| <i>circCOL4A5</i> | miR-1227-3p                         | 1 |
| <i>circCOL4A5</i> | miR-1247-3p                         | 1 |
| <i>circCOL4A5</i> | miR-125-5p                          | 1 |
| <i>circCOL4A5</i> | miR-1254/3116                       | 7 |
| <i>circCOL4A5</i> | miR-127-5p                          | 1 |
| <i>circCOL4A5</i> | miR-1273d                           | 1 |
| <i>circCOL4A5</i> | miR-129-3p                          | 2 |
| <i>circCOL4A5</i> | miR-1291/6775-3p                    | 2 |
| <i>circCOL4A5</i> | miR-1292-5p                         | 1 |
| <i>circCOL4A5</i> | miR-1294                            | 1 |
| <i>circCOL4A5</i> | miR-1298-5p                         | 1 |
| <i>circCOL4A5</i> | miR-1302/4298                       | 2 |
| <i>circCOL4A5</i> | miR-1343-3p                         | 7 |
| <i>circCOL4A5</i> | miR-143-5p                          | 1 |
| <i>circCOL4A5</i> | miR-144-5p                          | 1 |
| <i>circCOL4A5</i> | miR-145-3p                          | 3 |
| <i>circCOL4A5</i> | miR-146b-3p                         | 4 |
| <i>circCOL4A5</i> | miR-17-5p/20-5p/93-5p/106-5p/519-3p | 1 |
| <i>circCOL4A5</i> | miR-1909-5p                         | 1 |
| <i>circCOL4A5</i> | miR-192-5p/215-5p                   | 2 |
| <i>circCOL4A5</i> | miR-197-3p                          | 2 |
| <i>circCOL4A5</i> | miR-1976                            | 2 |
| <i>circCOL4A5</i> | miR-198                             | 4 |
| <i>circCOL4A5</i> | miR-204-3p/4646-5p                  | 2 |
| <i>circCOL4A5</i> | miR-205-5p                          | 1 |

|                   |                                              |    |
|-------------------|----------------------------------------------|----|
| <i>circCOL4A5</i> | miR-221-5p/8073                              | 4  |
| <i>circCOL4A5</i> | miR-2355-3p                                  | 1  |
| <i>circCOL4A5</i> | miR-29-3p                                    | 1  |
| <i>circCOL4A5</i> | miR-30-5p                                    | 2  |
| <i>circCOL4A5</i> | miR-3074-3p                                  | 1  |
| <i>circCOL4A5</i> | miR-3074-5p                                  | 3  |
| <i>circCOL4A5</i> | miR-30b-3p/1273h-5p/3689-3p/6779-5p/6780a-5p | 2  |
| <i>circCOL4A5</i> | miR-30c-3p/6788-5p                           | 2  |
| <i>circCOL4A5</i> | miR-3121-5p                                  | 4  |
| <i>circCOL4A5</i> | miR-3122/3913-5p                             | 2  |
| <i>circCOL4A5</i> | miR-3127-3p/6756-3p                          | 2  |
| <i>circCOL4A5</i> | miR-3128                                     | 3  |
| <i>circCOL4A5</i> | miR-3140-5p                                  | 1  |
| <i>circCOL4A5</i> | miR-3148                                     | 1  |
| <i>circCOL4A5</i> | miR-3153/6733-5p/6739-5p                     | 1  |
| <i>circCOL4A5</i> | miR-3173-5p                                  | 4  |
| <i>circCOL4A5</i> | miR-3174                                     | 1  |
| <i>circCOL4A5</i> | miR-3181                                     | 1  |
| <i>circCOL4A5</i> | miR-3192-5p                                  | 2  |
| <i>circCOL4A5</i> | miR-3201/4791                                | 1  |
| <i>circCOL4A5</i> | miR-335-5p                                   | 1  |
| <i>circCOL4A5</i> | miR-33b-3p/515-3p/519e-3p                    | 1  |
| <i>circCOL4A5</i> | miR-345-3p                                   | 1  |
| <i>circCOL4A5</i> | miR-3605-5p                                  | 1  |
| <i>circCOL4A5</i> | miR-3612                                     | 2  |
| <i>circCOL4A5</i> | miR-3619-3p                                  | 2  |
| <i>circCOL4A5</i> | miR-362-5p/500b-5p                           | 1  |
| <i>circCOL4A5</i> | miR-3622a-3p/3622b-3p                        | 2  |
| <i>circCOL4A5</i> | miR-3649                                     | 4  |
| <i>circCOL4A5</i> | miR-365-3p                                   | 1  |
| <i>circCOL4A5</i> | miR-3653-5p                                  | 2  |
| <i>circCOL4A5</i> | miR-3655                                     | 1  |
| <i>circCOL4A5</i> | miR-3663-3p                                  | 1  |
| <i>circCOL4A5</i> | miR-3670                                     | 2  |
| <i>circCOL4A5</i> | miR-3679-3p                                  | 2  |
| <i>circCOL4A5</i> | miR-3690                                     | 15 |
| <i>circCOL4A5</i> | miR-371a-3p                                  | 1  |
| <i>circCOL4A5</i> | miR-371b-3p                                  | 1  |

|                   |                           |    |
|-------------------|---------------------------|----|
| <i>circCOL4A5</i> | miR-380-5p/563            | 1  |
| <i>circCOL4A5</i> | miR-3912-5p               | 2  |
| <i>circCOL4A5</i> | miR-3915                  | 1  |
| <i>circCOL4A5</i> | miR-3925-3p               | 1  |
| <i>circCOL4A5</i> | miR-3944-3p               | 1  |
| <i>circCOL4A5</i> | miR-3978                  | 2  |
| <i>circCOL4A5</i> | miR-4254                  | 15 |
| <i>circCOL4A5</i> | miR-4261                  | 1  |
| <i>circCOL4A5</i> | miR-4267                  | 1  |
| <i>circCOL4A5</i> | miR-4268                  | 2  |
| <i>circCOL4A5</i> | miR-4270/4441/6754-5p     | 2  |
| <i>circCOL4A5</i> | miR-4271/4725-3p/6780b-5p | 1  |
| <i>circCOL4A5</i> | miR-4277                  | 1  |
| <i>circCOL4A5</i> | miR-4279                  | 3  |
| <i>circCOL4A5</i> | miR-4292/6791-5p          | 5  |
| <i>circCOL4A5</i> | miR-4293                  | 2  |
| <i>circCOL4A5</i> | miR-4308                  | 5  |
| <i>circCOL4A5</i> | miR-4316                  | 1  |
| <i>circCOL4A5</i> | miR-4421/5699-3p          | 1  |
| <i>circCOL4A5</i> | miR-4433a-3p              | 2  |
| <i>circCOL4A5</i> | miR-4433b-3p              | 1  |
| <i>circCOL4A5</i> | miR-4443                  | 4  |
| <i>circCOL4A5</i> | miR-4446-5p               | 1  |
| <i>circCOL4A5</i> | miR-4448                  | 2  |
| <i>circCOL4A5</i> | miR-4453/4538             | 1  |
| <i>circCOL4A5</i> | miR-4459                  | 2  |
| <i>circCOL4A5</i> | miR-4470                  | 1  |
| <i>circCOL4A5</i> | miR-4471/8059             | 1  |
| <i>circCOL4A5</i> | miR-4476/6876-5p          | 3  |
| <i>circCOL4A5</i> | miR-4490                  | 3  |
| <i>circCOL4A5</i> | miR-4496                  | 2  |
| <i>circCOL4A5</i> | miR-450a-1-3p             | 2  |
| <i>circCOL4A5</i> | miR-455-3p.2              | 1  |
| <i>circCOL4A5</i> | miR-4633-3p/6500-5p       | 2  |
| <i>circCOL4A5</i> | miR-4640-5p               | 1  |
| <i>circCOL4A5</i> | miR-4646-3p               | 1  |
| <i>circCOL4A5</i> | miR-4652-3p               | 1  |
| <i>circCOL4A5</i> | miR-4668-5p               | 1  |



|                   |                             |   |
|-------------------|-----------------------------|---|
| <i>circCOL4A5</i> | miR-4684-3p                 | 1 |
| <i>circCOL4A5</i> | miR-4685-5p/6837-5p         | 6 |
| <i>circCOL4A5</i> | miR-4687-5p                 | 2 |
| <i>circCOL4A5</i> | miR-4689/6858-5p            | 1 |
| <i>circCOL4A5</i> | miR-4720-5p/4799-3p/5588-5p | 3 |
| <i>circCOL4A5</i> | miR-4732-3p                 | 1 |
| <i>circCOL4A5</i> | miR-4733-3p                 | 3 |
| <i>circCOL4A5</i> | miR-4743-3p                 | 1 |
| <i>circCOL4A5</i> | miR-4747-3p                 | 2 |
| <i>circCOL4A5</i> | miR-4750-5p                 | 1 |
| <i>circCOL4A5</i> | miR-4751                    | 1 |
| <i>circCOL4A5</i> | miR-4755-3p                 | 3 |
| <i>circCOL4A5</i> | miR-4760-5p/8061            | 1 |
| <i>circCOL4A5</i> | miR-4766-5p                 | 1 |
| <i>circCOL4A5</i> | miR-4768-3p                 | 2 |
| <i>circCOL4A5</i> | miR-4774-5p                 | 3 |
| <i>circCOL4A5</i> | miR-4786-3p                 | 3 |
| <i>circCOL4A5</i> | miR-4786-5p                 | 1 |
| <i>circCOL4A5</i> | miR-4793-5p                 | 1 |
| <i>circCOL4A5</i> | miR-492                     | 3 |
| <i>circCOL4A5</i> | miR-497-3p                  | 1 |
| <i>circCOL4A5</i> | miR-5004-5p                 | 1 |
| <i>circCOL4A5</i> | miR-5006-5p                 | 1 |
| <i>circCOL4A5</i> | miR-5008-5p                 | 2 |
| <i>circCOL4A5</i> | miR-500a-3p                 | 1 |
| <i>circCOL4A5</i> | miR-500a-5p                 | 1 |
| <i>circCOL4A5</i> | miR-501-5p                  | 1 |
| <i>circCOL4A5</i> | miR-504-3p                  | 1 |
| <i>circCOL4A5</i> | miR-505-5p                  | 1 |
| <i>circCOL4A5</i> | miR-5088-3p                 | 1 |
| <i>circCOL4A5</i> | miR-5196-3p                 | 1 |
| <i>circCOL4A5</i> | miR-532-5p                  | 2 |
| <i>circCOL4A5</i> | miR-548ah-5p/3609           | 1 |
| <i>circCOL4A5</i> | miR-548az-5p/548t-5p        | 2 |
| <i>circCOL4A5</i> | miR-548n                    | 2 |
| <i>circCOL4A5</i> | miR-5584-5p                 | 1 |
| <i>circCOL4A5</i> | miR-5586-5p                 | 1 |
| <i>circCOL4A5</i> | miR-5700                    | 1 |

|                   |                     |   |
|-------------------|---------------------|---|
| <i>circCOL4A5</i> | miR-584-3p          | 1 |
| <i>circCOL4A5</i> | miR-596             | 2 |
| <i>circCOL4A5</i> | miR-6081            | 1 |
| <i>circCOL4A5</i> | miR-6089            | 2 |
| <i>circCOL4A5</i> | miR-6124            | 1 |
| <i>circCOL4A5</i> | miR-6128            | 6 |
| <i>circCOL4A5</i> | miR-618             | 1 |
| <i>circCOL4A5</i> | miR-619-3p          | 9 |
| <i>circCOL4A5</i> | miR-619-5p/6506-5p  | 2 |
| <i>circCOL4A5</i> | miR-631/3661        | 5 |
| <i>circCOL4A5</i> | miR-634             | 1 |
| <i>circCOL4A5</i> | miR-6505-5p         | 2 |
| <i>circCOL4A5</i> | miR-6508-3p         | 1 |
| <i>circCOL4A5</i> | miR-6513-5p         | 2 |
| <i>circCOL4A5</i> | miR-6514-3p         | 2 |
| <i>circCOL4A5</i> | miR-6515-5p         | 4 |
| <i>circCOL4A5</i> | miR-659-5p          | 3 |
| <i>circCOL4A5</i> | miR-661             | 7 |
| <i>circCOL4A5</i> | miR-671-5p          | 3 |
| <i>circCOL4A5</i> | miR-6715a-3p        | 1 |
| <i>circCOL4A5</i> | miR-6731-5p/8085    | 1 |
| <i>circCOL4A5</i> | miR-6742-3p         | 4 |
| <i>circCOL4A5</i> | miR-6748-3p         | 1 |
| <i>circCOL4A5</i> | miR-6749-5p         | 1 |
| <i>circCOL4A5</i> | miR-6750-5p/6822-5p | 1 |
| <i>circCOL4A5</i> | miR-6753-5p         | 8 |
| <i>circCOL4A5</i> | miR-676-3p          | 1 |
| <i>circCOL4A5</i> | miR-6765-3p         | 2 |
| <i>circCOL4A5</i> | miR-6779-3p         | 2 |
| <i>circCOL4A5</i> | miR-6782-3p         | 1 |
| <i>circCOL4A5</i> | miR-6783-5p         | 1 |
| <i>circCOL4A5</i> | miR-6798-5p         | 3 |
| <i>circCOL4A5</i> | miR-6802-3p         | 2 |
| <i>circCOL4A5</i> | miR-6804-3p         | 1 |
| <i>circCOL4A5</i> | miR-6822-3p         | 1 |
| <i>circCOL4A5</i> | miR-6826-3p         | 2 |
| <i>circCOL4A5</i> | miR-6828-5p         | 3 |
| <i>circCOL4A5</i> | miR-6832-3p         | 2 |

|                   |              |   |
|-------------------|--------------|---|
| <i>circCOL4A5</i> | miR-6845-3p  | 2 |
| <i>circCOL4A5</i> | miR-6851-3p  | 2 |
| <i>circCOL4A5</i> | miR-6852-5p  | 4 |
| <i>circCOL4A5</i> | miR-6861-3p  | 3 |
| <i>circCOL4A5</i> | miR-6865-3p  | 2 |
| <i>circCOL4A5</i> | miR-6868-5p  | 3 |
| <i>circCOL4A5</i> | miR-6871-3p  | 1 |
| <i>circCOL4A5</i> | miR-6874-5p  | 3 |
| <i>circCOL4A5</i> | miR-6878-5p  | 1 |
| <i>circCOL4A5</i> | miR-6879-3p  | 2 |
| <i>circCOL4A5</i> | miR-6888-3p  | 1 |
| <i>circCOL4A5</i> | miR-6894-3p  | 2 |
| <i>circCOL4A5</i> | miR-6894-5p  | 1 |
| <i>circCOL4A5</i> | miR-7109-3p  | 3 |
| <i>circCOL4A5</i> | miR-7113-5p  | 6 |
| <i>circCOL4A5</i> | miR-7151-5p  | 1 |
| <i>circCOL4A5</i> | miR-7152-5p  | 3 |
| <i>circCOL4A5</i> | miR-7154-3p  | 1 |
| <i>circCOL4A5</i> | miR-758-5p   | 1 |
| <i>circCOL4A5</i> | miR-760      | 1 |
| <i>circCOL4A5</i> | miR-765      | 1 |
| <i>circCOL4A5</i> | miR-766-3p   | 1 |
| <i>circCOL4A5</i> | miR-766-5p   | 1 |
| <i>circCOL4A5</i> | miR-767-5p   | 1 |
| <i>circCOL4A5</i> | miR-769-5p   | 1 |
| <i>circCOL4A5</i> | miR-770-5p   | 1 |
| <i>circCOL4A5</i> | miR-7843-3p  | 1 |
| <i>circCOL4A5</i> | miR-7851-3p  | 9 |
| <i>circCOL4A5</i> | miR-7976     | 4 |
| <i>circCOL4A5</i> | miR-873-5p.1 | 5 |
| <i>circCOL4A5</i> | miR-887-5p   | 2 |
| <i>circCOL4A5</i> | miR-9-5p     | 3 |
| <i>circCOL4A5</i> | miR-935      | 2 |
| <i>circCOL4A5</i> | miR-939-3p   | 4 |
| <i>circCOL4A5</i> | miR-9500     | 1 |
| <i>circCOL4A5</i> | miR-1178-5p  | 1 |
| <i>circCOL4A5</i> | miR-1180-5p  | 1 |
| <i>circCOL4A5</i> | miR-1182     | 1 |

|                   |                                    |   |
|-------------------|------------------------------------|---|
| <i>circCOL4A5</i> | miR-1228-3p                        | 1 |
| <i>circCOL4A5</i> | miR-1237-3p                        | 1 |
| <i>circCOL4A5</i> | miR-1245b-5p                       | 1 |
| <i>circCOL4A5</i> | miR-1248                           | 1 |
| <i>circCOL4A5</i> | miR-1249-5p/6797-5p                | 2 |
| <i>circCOL4A5</i> | miR-125a-3p                        | 3 |
| <i>circCOL4A5</i> | miR-1290                           | 1 |
| <i>circCOL4A5</i> | miR-1293/4483                      | 1 |
| <i>circCOL4A5</i> | miR-1295a                          | 1 |
| <i>circCOL4A5</i> | miR-1295b-3p                       | 1 |
| <i>circCOL4A5</i> | miR-130b-5p                        | 1 |
| <i>circCOL4A5</i> | miR-133a-3p.1                      | 2 |
| <i>circCOL4A5</i> | miR-133a-3p.2/133b                 | 1 |
| <i>circCOL4A5</i> | miR-141-5p                         | 1 |
| <i>circCOL4A5</i> | miR-149-3p/4728-5p/6785-5p/6883-5p | 1 |
| <i>circCOL4A5</i> | miR-149-5p                         | 1 |
| <i>circCOL4A5</i> | miR-152-5p                         | 1 |
| <i>circCOL4A5</i> | miR-182-3p                         | 1 |
| <i>circCOL4A5</i> | miR-188-5p                         | 1 |
| <i>circCOL4A5</i> | miR-18b-3p                         | 1 |
| <i>circCOL4A5</i> | miR-1911-3p                        | 3 |
| <i>circCOL4A5</i> | miR-1915-3p/6764-5p                | 3 |
| <i>circCOL4A5</i> | miR-2115-5p                        | 1 |
| <i>circCOL4A5</i> | miR-2117                           | 1 |
| <i>circCOL4A5</i> | miR-218-1-3p                       | 1 |
| <i>circCOL4A5</i> | miR-218-2-3p                       | 1 |
| <i>circCOL4A5</i> | miR-23-5p                          | 1 |
| <i>circCOL4A5</i> | miR-2861                           | 2 |
| <i>circCOL4A5</i> | miR-297                            | 1 |
| <i>circCOL4A5</i> | miR-302a-5p                        | 1 |
| <i>circCOL4A5</i> | miR-31-5p                          | 2 |
| <i>circCOL4A5</i> | miR-3117-3p                        | 1 |
| <i>circCOL4A5</i> | miR-3136-3p/7155-3p                | 1 |
| <i>circCOL4A5</i> | miR-3144-5p                        | 2 |
| <i>circCOL4A5</i> | miR-3149                           | 1 |
| <i>circCOL4A5</i> | miR-3157-3p                        | 1 |
| <i>circCOL4A5</i> | miR-3176/3922-3p                   | 1 |
| <i>circCOL4A5</i> | miR-3180-5p                        | 3 |

|                   |                   |   |
|-------------------|-------------------|---|
| <i>circCOL4A5</i> | miR-3190-5p       | 1 |
| <i>circCOL4A5</i> | miR-3191-3p       | 2 |
| <i>circCOL4A5</i> | miR-3191-5p       | 1 |
| <i>circCOL4A5</i> | miR-3193          | 1 |
| <i>circCOL4A5</i> | miR-3200-3p       | 1 |
| <i>circCOL4A5</i> | miR-323a-5p       | 1 |
| <i>circCOL4A5</i> | miR-328-3p        | 1 |
| <i>circCOL4A5</i> | miR-335-3p        | 1 |
| <i>circCOL4A5</i> | miR-3614-3p       | 1 |
| <i>circCOL4A5</i> | miR-3616-3p       | 2 |
| <i>circCOL4A5</i> | miR-363-5p/6745   | 1 |
| <i>circCOL4A5</i> | miR-3652/4430     | 2 |
| <i>circCOL4A5</i> | miR-3657          | 1 |
| <i>circCOL4A5</i> | miR-3667-5p       | 1 |
| <i>circCOL4A5</i> | miR-3675-3p       | 1 |
| <i>circCOL4A5</i> | miR-3684          | 1 |
| <i>circCOL4A5</i> | miR-3689d/6851-5p | 1 |
| <i>circCOL4A5</i> | miR-3692-3p       | 1 |
| <i>circCOL4A5</i> | miR-3713          | 1 |
| <i>circCOL4A5</i> | miR-378g          | 1 |
| <i>circCOL4A5</i> | miR-378j/6839-5p  | 2 |
| <i>circCOL4A5</i> | miR-3907          | 1 |
| <i>circCOL4A5</i> | miR-3934-5p       | 3 |
| <i>circCOL4A5</i> | miR-3938          | 1 |
| <i>circCOL4A5</i> | miR-3940-5p/4507  | 3 |
| <i>circCOL4A5</i> | miR-409-5p        | 1 |
| <i>circCOL4A5</i> | miR-4256          | 1 |
| <i>circCOL4A5</i> | miR-4269/6715b-5p | 1 |
| <i>circCOL4A5</i> | miR-4297/5581-5p  | 1 |
| <i>circCOL4A5</i> | miR-4305          | 1 |
| <i>circCOL4A5</i> | miR-4423-5p       | 1 |
| <i>circCOL4A5</i> | miR-4433a-5p      | 1 |
| <i>circCOL4A5</i> | miR-4433b-5p      | 1 |
| <i>circCOL4A5</i> | miR-4474-5p       | 1 |
| <i>circCOL4A5</i> | miR-4486          | 1 |
| <i>circCOL4A5</i> | miR-4505/5787     | 2 |
| <i>circCOL4A5</i> | miR-4512          | 2 |
| <i>circCOL4A5</i> | miR-4514/4692     | 1 |

|                   |                                                                    |   |
|-------------------|--------------------------------------------------------------------|---|
| <i>circCOL4A5</i> | miR-4633-5p                                                        | 1 |
| <i>circCOL4A5</i> | miR-4645-5p/4673                                                   | 3 |
| <i>circCOL4A5</i> | miR-4652-5p                                                        | 2 |
| <i>circCOL4A5</i> | miR-4659a-3p/4659b-3p                                              | 1 |
| <i>circCOL4A5</i> | miR-4669                                                           | 1 |
| <i>circCOL4A5</i> | miR-4678                                                           | 1 |
| <i>circCOL4A5</i> | miR-4695-5p                                                        | 1 |
| <i>circCOL4A5</i> | miR-4707-5p                                                        | 1 |
| <i>circCOL4A5</i> | miR-4715-3p                                                        | 1 |
| <i>circCOL4A5</i> | miR-4716-3p/6794-5p                                                | 2 |
| <i>circCOL4A5</i> | miR-4721                                                           | 2 |
| <i>circCOL4A5</i> | miR-4722-3p/6727-3p                                                | 1 |
| <i>circCOL4A5</i> | miR-4723-5p/5698/6870-5p/7111-5p                                   | 2 |
| <i>circCOL4A5</i> | miR-4726-3p                                                        | 3 |
| <i>circCOL4A5</i> | miR-4727-5p                                                        | 1 |
| <i>circCOL4A5</i> | miR-4731-5p                                                        | 1 |
| <i>circCOL4A5</i> | miR-4742-5p                                                        | 1 |
| <i>circCOL4A5</i> | miR-4750-3p                                                        | 1 |
| <i>circCOL4A5</i> | miR-4755-5p/5006-3p                                                | 1 |
| <i>circCOL4A5</i> | miR-4769-3p/6817-5p                                                | 1 |
| <i>circCOL4A5</i> | miR-4777-5p                                                        | 1 |
| <i>circCOL4A5</i> | miR-4779                                                           | 1 |
| <i>circCOL4A5</i> | miR-484/3155                                                       | 2 |
| <i>circCOL4A5</i> | miR-490-3p                                                         | 1 |
| <i>circCOL4A5</i> | miR-499a-3p/499b-3p                                                | 1 |
| <i>circCOL4A5</i> | miR-5001-3p                                                        | 1 |
| <i>circCOL4A5</i> | miR-5010-5p                                                        | 2 |
| <i>circCOL4A5</i> | miR-5089-3p                                                        | 1 |
| <i>circCOL4A5</i> | miR-5096                                                           | 2 |
| <i>circCOL4A5</i> | miR-516a-3p/516b-3p/7162-5p                                        | 1 |
| <i>circCOL4A5</i> | miR-518d-5p/519-5p                                                 | 1 |
| <i>circCOL4A5</i> | miR-541-5p                                                         | 1 |
| <i>circCOL4A5</i> | miR-548ao-3p                                                       | 1 |
| <i>circCOL4A5</i> | miR-548av-5p/548k/8054                                             | 1 |
| <i>circCOL4A5</i> | miR-548ay-5p/548au-5p/548as-5p/548ar-5p/548aq-5p/548ap-5p/548am-5p | 1 |
| <i>circCOL4A5</i> | miR-548l                                                           | 1 |
| <i>circCOL4A5</i> | miR-5571-5p                                                        | 1 |
| <i>circCOL4A5</i> | miR-5580-5p                                                        | 1 |

|                   |                                      |   |
|-------------------|--------------------------------------|---|
| <i>circCOL4A5</i> | miR-5587-3p                          | 1 |
| <i>circCOL4A5</i> | miR-5589-5p                          | 1 |
| <i>circCOL4A5</i> | miR-5681b                            | 1 |
| <i>circCOL4A5</i> | miR-5704                             | 1 |
| <i>circCOL4A5</i> | miR-575/4676-5p                      | 1 |
| <i>circCOL4A5</i> | miR-597-3p                           | 1 |
| <i>circCOL4A5</i> | miR-6074                             | 1 |
| <i>circCOL4A5</i> | miR-6077                             | 1 |
| <i>circCOL4A5</i> | miR-6079                             | 2 |
| <i>circCOL4A5</i> | miR-612/1285-3p/3187-5p/5189-5p/6860 | 1 |
| <i>circCOL4A5</i> | miR-625-5p                           | 2 |
| <i>circCOL4A5</i> | miR-629-3p                           | 1 |
| <i>circCOL4A5</i> | miR-630                              | 1 |
| <i>circCOL4A5</i> | miR-642b-5p                          | 1 |
| <i>circCOL4A5</i> | miR-643                              | 1 |
| <i>circCOL4A5</i> | miR-647                              | 1 |
| <i>circCOL4A5</i> | miR-649                              | 1 |
| <i>circCOL4A5</i> | miR-6501-5p                          | 1 |
| <i>circCOL4A5</i> | miR-6502-3p                          | 1 |
| <i>circCOL4A5</i> | miR-651-5p                           | 1 |
| <i>circCOL4A5</i> | miR-656-5p                           | 1 |
| <i>circCOL4A5</i> | miR-660-5p                           | 1 |
| <i>circCOL4A5</i> | miR-663b                             | 1 |
| <i>circCOL4A5</i> | miR-664a-5p/4794                     | 1 |
| <i>circCOL4A5</i> | miR-670-5p                           | 2 |
| <i>circCOL4A5</i> | miR-6724-5p/6773-5p                  | 1 |
| <i>circCOL4A5</i> | miR-6728-3p                          | 1 |
| <i>circCOL4A5</i> | miR-6732-5p                          | 2 |
| <i>circCOL4A5</i> | miR-6735-3p                          | 3 |
| <i>circCOL4A5</i> | miR-6747-3p                          | 1 |
| <i>circCOL4A5</i> | miR-675-3p                           | 1 |
| <i>circCOL4A5</i> | miR-6756-5p/6766-5p                  | 1 |
| <i>circCOL4A5</i> | miR-6757-5p                          | 1 |
| <i>circCOL4A5</i> | miR-6763-3p                          | 1 |
| <i>circCOL4A5</i> | miR-6772-3p                          | 1 |
| <i>circCOL4A5</i> | miR-6776-5p                          | 3 |
| <i>circCOL4A5</i> | miR-6781-5p                          | 1 |
| <i>circCOL4A5</i> | miR-6790-3p                          | 1 |

|                   |                     |   |
|-------------------|---------------------|---|
| <i>circCOL4A5</i> | miR-6799-5p         | 1 |
| <i>circCOL4A5</i> | miR-6800-3p         | 1 |
| <i>circCOL4A5</i> | miR-6805-5p         | 2 |
| <i>circCOL4A5</i> | miR-6809-5p         | 2 |
| <i>circCOL4A5</i> | miR-6813-3p         | 1 |
| <i>circCOL4A5</i> | miR-6815-3p         | 1 |
| <i>circCOL4A5</i> | miR-6815-5p/6865-5p | 1 |
| <i>circCOL4A5</i> | miR-6821-3p         | 1 |
| <i>circCOL4A5</i> | miR-6823-5p         | 1 |
| <i>circCOL4A5</i> | miR-6839-3p         | 3 |
| <i>circCOL4A5</i> | miR-6840-3p         | 3 |
| <i>circCOL4A5</i> | miR-6842-3p         | 1 |
| <i>circCOL4A5</i> | miR-6858-3p         | 1 |
| <i>circCOL4A5</i> | miR-6861-5p         | 3 |
| <i>circCOL4A5</i> | miR-6875-3p         | 1 |
| <i>circCOL4A5</i> | miR-6877-5p         | 1 |
| <i>circCOL4A5</i> | miR-6878-3p         | 1 |
| <i>circCOL4A5</i> | miR-6885-3p         | 1 |
| <i>circCOL4A5</i> | miR-6895-5p         | 2 |
| <i>circCOL4A5</i> | miR-7-5p            | 1 |
| <i>circCOL4A5</i> | miR-7106-5p         | 1 |
| <i>circCOL4A5</i> | miR-711             | 1 |
| <i>circCOL4A5</i> | miR-7160-3p         | 2 |
| <i>circCOL4A5</i> | miR-764             | 1 |
| <i>circCOL4A5</i> | miR-7977            | 2 |
| <i>circCOL4A5</i> | miR-874-3p          | 1 |
| <i>circCOL4A5</i> | miR-876-3p          | 1 |
| <i>circCOL4A5</i> | miR-876-5p          | 1 |
| <i>circCORO1C</i> | miR-10-5p           | 1 |
| <i>circCORO1C</i> | miR-103-3p/107      | 1 |
| <i>circCORO1C</i> | miR-105-3p          | 1 |
| <i>circCORO1C</i> | miR-105-5p          | 2 |
| <i>circCORO1C</i> | miR-1202/3972       | 1 |
| <i>circCORO1C</i> | miR-1226-3p         | 1 |
| <i>circCORO1C</i> | miR-1236-3p         | 1 |
| <i>circCORO1C</i> | miR-125-5p          | 1 |
| <i>circCORO1C</i> | miR-1255a/1255b-5p  | 1 |
| <i>circCORO1C</i> | miR-125a-3p         | 1 |



|                   |                                      |   |
|-------------------|--------------------------------------|---|
| <i>circCORO1C</i> | miR-1273f                            | 1 |
| <i>circCORO1C</i> | miR-1286                             | 1 |
| <i>circCORO1C</i> | miR-138-2-3p                         | 1 |
| <i>circCORO1C</i> | miR-143-3p                           | 1 |
| <i>circCORO1C</i> | miR-15-5p/16-5p/195-5p/424-5p/497-5p | 1 |
| <i>circCORO1C</i> | miR-153-5p                           | 1 |
| <i>circCORO1C</i> | miR-16-1-3p                          | 1 |
| <i>circCORO1C</i> | miR-181-5p                           | 1 |
| <i>circCORO1C</i> | miR-192-3p                           | 1 |
| <i>circCORO1C</i> | miR-196b-3p                          | 1 |
| <i>circCORO1C</i> | miR-2053                             | 2 |
| <i>circCORO1C</i> | miR-211-3p                           | 2 |
| <i>circCORO1C</i> | miR-2114-3p                          | 2 |
| <i>circCORO1C</i> | miR-214-3p/3619-5p                   | 2 |
| <i>circCORO1C</i> | miR-2277-3p                          | 1 |
| <i>circCORO1C</i> | miR-2278                             | 1 |
| <i>circCORO1C</i> | miR-28-5p/708-5p                     | 2 |
| <i>circCORO1C</i> | miR-302c-5p                          | 2 |
| <i>circCORO1C</i> | miR-302f                             | 1 |
| <i>circCORO1C</i> | miR-3064-3p                          | 2 |
| <i>circCORO1C</i> | miR-3117-5p                          | 1 |
| <i>circCORO1C</i> | miR-3120-3p                          | 1 |
| <i>circCORO1C</i> | miR-3126-5p                          | 2 |
| <i>circCORO1C</i> | miR-3134                             | 1 |
| <i>circCORO1C</i> | miR-3144-5p                          | 2 |
| <i>circCORO1C</i> | miR-3170/6855-5p                     | 1 |
| <i>circCORO1C</i> | miR-3173-3p/6891-5p                  | 2 |
| <i>circCORO1C</i> | miR-3191-3p                          | 2 |
| <i>circCORO1C</i> | miR-3199/8052                        | 2 |
| <i>circCORO1C</i> | miR-335-5p                           | 2 |
| <i>circCORO1C</i> | miR-338-3p                           | 1 |
| <i>circCORO1C</i> | miR-342-5p/4664-5p                   | 1 |
| <i>circCORO1C</i> | miR-3613-3p                          | 1 |
| <i>circCORO1C</i> | miR-365a-5p/365b-5p                  | 2 |
| <i>circCORO1C</i> | miR-3660/4526                        | 1 |
| <i>circCORO1C</i> | miR-3675-5p                          | 1 |
| <i>circCORO1C</i> | miR-3678-5p                          | 1 |
| <i>circCORO1C</i> | miR-382-3p                           | 1 |

|                   |                                    |   |
|-------------------|------------------------------------|---|
| <i>circCORO1C</i> | miR-383-5p.2                       | 1 |
| <i>circCORO1C</i> | miR-3908                           | 1 |
| <i>circCORO1C</i> | miR-3914                           | 1 |
| <i>circCORO1C</i> | miR-3919                           | 2 |
| <i>circCORO1C</i> | miR-3934-5p                        | 1 |
| <i>circCORO1C</i> | miR-3940-5p/4507                   | 2 |
| <i>circCORO1C</i> | miR-3942-3p                        | 1 |
| <i>circCORO1C</i> | miR-3942-5p                        | 1 |
| <i>circCORO1C</i> | miR-409-5p                         | 2 |
| <i>circCORO1C</i> | miR-421                            | 1 |
| <i>circCORO1C</i> | miR-423-5p                         | 2 |
| <i>circCORO1C</i> | miR-425-5p                         | 1 |
| <i>circCORO1C</i> | miR-4274                           | 1 |
| <i>circCORO1C</i> | miR-4289                           | 1 |
| <i>circCORO1C</i> | miR-4291                           | 1 |
| <i>circCORO1C</i> | miR-4310/7157-5p                   | 1 |
| <i>circCORO1C</i> | miR-433-3p                         | 1 |
| <i>circCORO1C</i> | miR-4330                           | 2 |
| <i>circCORO1C</i> | miR-4419a/4510/6127/6129/6130/6133 | 2 |
| <i>circCORO1C</i> | miR-4428                           | 2 |
| <i>circCORO1C</i> | miR-4436b-5p                       | 1 |
| <i>circCORO1C</i> | miR-4455                           | 1 |
| <i>circCORO1C</i> | miR-4482-3p                        | 1 |
| <i>circCORO1C</i> | miR-4501                           | 2 |
| <i>circCORO1C</i> | miR-4504                           | 1 |
| <i>circCORO1C</i> | miR-4506                           | 1 |
| <i>circCORO1C</i> | miR-4517                           | 1 |
| <i>circCORO1C</i> | miR-4519                           | 1 |
| <i>circCORO1C</i> | miR-4520-3p                        | 1 |
| <i>circCORO1C</i> | miR-4530                           | 1 |
| <i>circCORO1C</i> | miR-4534/8082                      | 1 |
| <i>circCORO1C</i> | miR-4643                           | 1 |
| <i>circCORO1C</i> | miR-4652-5p                        | 2 |
| <i>circCORO1C</i> | miR-4661-5p                        | 1 |
| <i>circCORO1C</i> | miR-4666a-5p                       | 2 |
| <i>circCORO1C</i> | miR-4694-5p                        | 1 |
| <i>circCORO1C</i> | miR-4704-5p                        | 1 |
| <i>circCORO1C</i> | miR-4708-3p                        | 2 |

|                   |              |   |
|-------------------|--------------|---|
| <i>circCORO1C</i> | miR-4708-5p  | 1 |
| <i>circCORO1C</i> | miR-4711-5p  | 1 |
| <i>circCORO1C</i> | miR-4712-3p  | 1 |
| <i>circCORO1C</i> | miR-4722-5p  | 1 |
| <i>circCORO1C</i> | miR-4725-5p  | 1 |
| <i>circCORO1C</i> | miR-4732-3p  | 1 |
| <i>circCORO1C</i> | miR-4733-3p  | 1 |
| <i>circCORO1C</i> | miR-4755-3p  | 1 |
| <i>circCORO1C</i> | miR-4756-3p  | 2 |
| <i>circCORO1C</i> | miR-4766-3p  | 1 |
| <i>circCORO1C</i> | miR-4776-3p  | 2 |
| <i>circCORO1C</i> | miR-4777-3p  | 1 |
| <i>circCORO1C</i> | miR-4789-3p  | 1 |
| <i>circCORO1C</i> | miR-495-3p   | 2 |
| <i>circCORO1C</i> | miR-4999-3p  | 1 |
| <i>circCORO1C</i> | miR-5006-5p  | 1 |
| <i>circCORO1C</i> | miR-503-5p   | 1 |
| <i>circCORO1C</i> | miR-504-5p.1 | 1 |
| <i>circCORO1C</i> | miR-505-3p.2 | 1 |
| <i>circCORO1C</i> | miR-506-5p   | 1 |
| <i>circCORO1C</i> | miR-5186     | 2 |
| <i>circCORO1C</i> | miR-5187-5p  | 2 |
| <i>circCORO1C</i> | miR-5194     | 2 |
| <i>circCORO1C</i> | miR-541-5p   | 2 |
| <i>circCORO1C</i> | miR-542-3p   | 1 |
| <i>circCORO1C</i> | miR-545-3p   | 1 |
| <i>circCORO1C</i> | miR-548c-3p  | 1 |
| <i>circCORO1C</i> | miR-548g-3p  | 1 |
| <i>circCORO1C</i> | miR-5583-3p  | 1 |
| <i>circCORO1C</i> | miR-5691     | 1 |
| <i>circCORO1C</i> | miR-5694     | 1 |
| <i>circCORO1C</i> | miR-5696     | 1 |
| <i>circCORO1C</i> | miR-579-3p   | 1 |
| <i>circCORO1C</i> | miR-600      | 2 |
| <i>circCORO1C</i> | miR-608/4651 | 1 |
| <i>circCORO1C</i> | miR-609      | 1 |
| <i>circCORO1C</i> | miR-616-3p   | 1 |
| <i>circCORO1C</i> | miR-630      | 1 |

|                   |                             |   |
|-------------------|-----------------------------|---|
| <i>circCORO1C</i> | miR-634                     | 1 |
| <i>circCORO1C</i> | miR-646                     | 1 |
| <i>circCORO1C</i> | miR-6501-3p                 | 1 |
| <i>circCORO1C</i> | miR-6509-3p                 | 1 |
| <i>circCORO1C</i> | miR-6511-5p                 | 1 |
| <i>circCORO1C</i> | miR-6515-3p                 | 1 |
| <i>circCORO1C</i> | miR-6719-3p                 | 1 |
| <i>circCORO1C</i> | miR-6730-3p                 | 1 |
| <i>circCORO1C</i> | miR-6737-5p/6812-5p/6819-5p | 1 |
| <i>circCORO1C</i> | miR-6739-3p                 | 1 |
| <i>circCORO1C</i> | miR-6744-5p                 | 1 |
| <i>circCORO1C</i> | miR-6747-5p                 | 1 |
| <i>circCORO1C</i> | miR-6757-5p                 | 2 |
| <i>circCORO1C</i> | miR-6758-5p/6856-5p         | 2 |
| <i>circCORO1C</i> | miR-676-5p                  | 1 |
| <i>circCORO1C</i> | miR-6763-3p                 | 1 |
| <i>circCORO1C</i> | miR-6772-5p                 | 1 |
| <i>circCORO1C</i> | miR-6783-5p                 | 2 |
| <i>circCORO1C</i> | miR-6814-5p                 | 2 |
| <i>circCORO1C</i> | miR-6819-3p/6877-3p         | 2 |
| <i>circCORO1C</i> | miR-6830-5p                 | 2 |
| <i>circCORO1C</i> | miR-6839-3p                 | 2 |
| <i>circCORO1C</i> | miR-6873-5p                 | 4 |
| <i>circCORO1C</i> | miR-6882-3p                 | 1 |
| <i>circCORO1C</i> | miR-6890-5p                 | 1 |
| <i>circCORO1C</i> | miR-7112-3p                 | 1 |
| <i>circCORO1C</i> | miR-7154-5p                 | 1 |
| <i>circCORO1C</i> | miR-7159-3p                 | 1 |
| <i>circCORO1C</i> | miR-7159-5p                 | 1 |
| <i>circCORO1C</i> | miR-744-3p                  | 1 |
| <i>circCORO1C</i> | miR-8055                    | 1 |
| <i>circCORO1C</i> | miR-8066                    | 2 |
| <i>circCORO1C</i> | miR-873-5p.1                | 1 |
| <i>circCORO1C</i> | miR-873-5p.2                | 1 |
| <i>circCORO1C</i> | miR-875-5p                  | 1 |
| <i>circCORO1C</i> | miR-892-5p                  | 1 |
| <i>circCORO1C</i> | miR-892b                    | 1 |
| <i>circCORO1C</i> | miR-922                     | 2 |

|                  |                    |   |
|------------------|--------------------|---|
| <i>circCSMD3</i> | let-7-5p/98-5p     | 1 |
| <i>circCSMD3</i> | miR-1-3p/206       | 1 |
| <i>circCSMD3</i> | miR-10-5p          | 1 |
| <i>circCSMD3</i> | miR-101-3p.1       | 1 |
| <i>circCSMD3</i> | miR-103a-2-5p      | 1 |
| <i>circCSMD3</i> | miR-103b           | 2 |
| <i>circCSMD3</i> | miR-106a-3p        | 1 |
| <i>circCSMD3</i> | miR-1178-5p        | 1 |
| <i>circCSMD3</i> | miR-1180-5p        | 2 |
| <i>circCSMD3</i> | miR-1182           | 1 |
| <i>circCSMD3</i> | miR-1183           | 1 |
| <i>circCSMD3</i> | miR-1200           | 1 |
| <i>circCSMD3</i> | miR-1206           | 2 |
| <i>circCSMD3</i> | miR-1208           | 2 |
| <i>circCSMD3</i> | miR-122-5p         | 3 |
| <i>circCSMD3</i> | miR-1224-3p        | 1 |
| <i>circCSMD3</i> | miR-1226-3p        | 4 |
| <i>circCSMD3</i> | miR-1231           | 1 |
| <i>circCSMD3</i> | miR-1236-5p        | 1 |
| <i>circCSMD3</i> | miR-1238-3p        | 2 |
| <i>circCSMD3</i> | miR-124-5p         | 1 |
| <i>circCSMD3</i> | miR-1243           | 2 |
| <i>circCSMD3</i> | miR-1245a/8079     | 1 |
| <i>circCSMD3</i> | miR-1246           | 2 |
| <i>circCSMD3</i> | miR-1250-3p        | 1 |
| <i>circCSMD3</i> | miR-1251-3p        | 2 |
| <i>circCSMD3</i> | miR-1252-3p        | 1 |
| <i>circCSMD3</i> | miR-1252-5p        | 3 |
| <i>circCSMD3</i> | miR-1255a/1255b-5p | 2 |
| <i>circCSMD3</i> | miR-1261           | 1 |
| <i>circCSMD3</i> | miR-1265           | 1 |
| <i>circCSMD3</i> | miR-1267           | 2 |
| <i>circCSMD3</i> | miR-1269           | 2 |
| <i>circCSMD3</i> | miR-1272           | 3 |
| <i>circCSMD3</i> | miR-1273f          | 1 |
| <i>circCSMD3</i> | miR-1273g-3p       | 3 |
| <i>circCSMD3</i> | miR-1273h-3p       | 1 |
| <i>circCSMD3</i> | miR-1277-5p        | 2 |

|                  |                                      |   |
|------------------|--------------------------------------|---|
| <i>circCSMD3</i> | miR-1278                             | 1 |
| <i>circCSMD3</i> | miR-1279                             | 1 |
| <i>circCSMD3</i> | miR-1284                             | 1 |
| <i>circCSMD3</i> | miR-1290                             | 3 |
| <i>circCSMD3</i> | miR-1294                             | 1 |
| <i>circCSMD3</i> | miR-1295b-5p/1912                    | 2 |
| <i>circCSMD3</i> | miR-1298-3p                          | 1 |
| <i>circCSMD3</i> | miR-1299                             | 2 |
| <i>circCSMD3</i> | miR-1302/4298                        | 2 |
| <i>circCSMD3</i> | miR-1304-5p                          | 2 |
| <i>circCSMD3</i> | miR-1305                             | 4 |
| <i>circCSMD3</i> | miR-130b-5p                          | 1 |
| <i>circCSMD3</i> | miR-132-3p/212-3p                    | 2 |
| <i>circCSMD3</i> | miR-1322                             | 3 |
| <i>circCSMD3</i> | miR-1323                             | 1 |
| <i>circCSMD3</i> | miR-1324                             | 1 |
| <i>circCSMD3</i> | miR-133a-5p                          | 1 |
| <i>circCSMD3</i> | miR-134-5p                           | 1 |
| <i>circCSMD3</i> | miR-1343-3p                          | 2 |
| <i>circCSMD3</i> | miR-137                              | 1 |
| <i>circCSMD3</i> | miR-138-5p                           | 1 |
| <i>circCSMD3</i> | miR-139-3p                           | 1 |
| <i>circCSMD3</i> | miR-141-3p/200-3p                    | 1 |
| <i>circCSMD3</i> | miR-142-3p.1                         | 1 |
| <i>circCSMD3</i> | miR-143-3p                           | 1 |
| <i>circCSMD3</i> | miR-143-5p                           | 2 |
| <i>circCSMD3</i> | miR-144-3p                           | 1 |
| <i>circCSMD3</i> | miR-144-5p                           | 1 |
| <i>circCSMD3</i> | miR-145-3p                           | 1 |
| <i>circCSMD3</i> | miR-145-5p                           | 2 |
| <i>circCSMD3</i> | miR-146-5p                           | 1 |
| <i>circCSMD3</i> | miR-146a-3p                          | 2 |
| <i>circCSMD3</i> | miR-149-5p                           | 1 |
| <i>circCSMD3</i> | miR-15-5p/16-5p/195-5p/424-5p/497-5p | 1 |
| <i>circCSMD3</i> | miR-152-5p                           | 1 |
| <i>circCSMD3</i> | miR-153-5p                           | 3 |
| <i>circCSMD3</i> | miR-1537-5p                          | 1 |
| <i>circCSMD3</i> | miR-1539                             | 1 |

|                  |                      |   |
|------------------|----------------------|---|
| <i>circCSMD3</i> | miR-154-5p           | 1 |
| <i>circCSMD3</i> | miR-15b-3p           | 2 |
| <i>circCSMD3</i> | miR-16-1-3p          | 1 |
| <i>circCSMD3</i> | miR-16-2-3p/195-3p   | 2 |
| <i>circCSMD3</i> | miR-1825             | 1 |
| <i>circCSMD3</i> | miR-1827             | 1 |
| <i>circCSMD3</i> | miR-183-3p           | 3 |
| <i>circCSMD3</i> | miR-183-5p.1         | 3 |
| <i>circCSMD3</i> | miR-183-5p.2         | 2 |
| <i>circCSMD3</i> | miR-184              | 1 |
| <i>circCSMD3</i> | miR-185-3p           | 2 |
| <i>circCSMD3</i> | miR-185-5p           | 1 |
| <i>circCSMD3</i> | miR-186-5p           | 1 |
| <i>circCSMD3</i> | miR-187-3p           | 1 |
| <i>circCSMD3</i> | miR-19-5p            | 1 |
| <i>circCSMD3</i> | miR-190-5p           | 2 |
| <i>circCSMD3</i> | miR-1910-3p/6511a-5p | 1 |
| <i>circCSMD3</i> | miR-1911-3p          | 1 |
| <i>circCSMD3</i> | miR-1914-5p          | 1 |
| <i>circCSMD3</i> | miR-1915-3p/6764-5p  | 2 |
| <i>circCSMD3</i> | miR-1915-5p          | 2 |
| <i>circCSMD3</i> | miR-192-3p           | 1 |
| <i>circCSMD3</i> | miR-196-5p           | 2 |
| <i>circCSMD3</i> | miR-196b-3p          | 1 |
| <i>circCSMD3</i> | miR-197-3p           | 2 |
| <i>circCSMD3</i> | miR-1976             | 1 |
| <i>circCSMD3</i> | miR-199-5p           | 1 |
| <i>circCSMD3</i> | miR-200-3p/429       | 1 |
| <i>circCSMD3</i> | miR-200ab-5p         | 3 |
| <i>circCSMD3</i> | miR-203a-3p.1        | 1 |
| <i>circCSMD3</i> | miR-203b-3p          | 1 |
| <i>circCSMD3</i> | miR-203b-5p/6718-5p  | 1 |
| <i>circCSMD3</i> | miR-204-3p/4646-5p   | 1 |
| <i>circCSMD3</i> | miR-205-3p           | 5 |
| <i>circCSMD3</i> | miR-2052             | 1 |
| <i>circCSMD3</i> | miR-20a-3p           | 1 |
| <i>circCSMD3</i> | miR-20b-3p           | 1 |
| <i>circCSMD3</i> | miR-2110             | 2 |

|                  |                                              |   |
|------------------|----------------------------------------------|---|
| <i>circCSMD3</i> | miR-2113                                     | 1 |
| <i>circCSMD3</i> | miR-2114-3p                                  | 1 |
| <i>circCSMD3</i> | miR-2115-3p                                  | 1 |
| <i>circCSMD3</i> | miR-2116-5p                                  | 1 |
| <i>circCSMD3</i> | miR-212-5p                                   | 1 |
| <i>circCSMD3</i> | miR-219a-1-3p                                | 2 |
| <i>circCSMD3</i> | miR-22-5p                                    | 1 |
| <i>circCSMD3</i> | miR-221-5p/8073                              | 2 |
| <i>circCSMD3</i> | miR-224-5p                                   | 1 |
| <i>circCSMD3</i> | miR-2277-3p                                  | 1 |
| <i>circCSMD3</i> | miR-23-3p                                    | 2 |
| <i>circCSMD3</i> | miR-2355-5p                                  | 1 |
| <i>circCSMD3</i> | miR-2392                                     | 2 |
| <i>circCSMD3</i> | miR-2467-3p                                  | 1 |
| <i>circCSMD3</i> | miR-2467-5p                                  | 1 |
| <i>circCSMD3</i> | miR-26-3p                                    | 1 |
| <i>circCSMD3</i> | miR-2681-3p                                  | 1 |
| <i>circCSMD3</i> | miR-29-3p                                    | 2 |
| <i>circCSMD3</i> | miR-2909                                     | 1 |
| <i>circCSMD3</i> | miR-297                                      | 1 |
| <i>circCSMD3</i> | miR-299-3p                                   | 4 |
| <i>circCSMD3</i> | miR-29b-1-5p                                 | 2 |
| <i>circCSMD3</i> | miR-302c-5p                                  | 2 |
| <i>circCSMD3</i> | miR-3064-3p                                  | 3 |
| <i>circCSMD3</i> | miR-3065-5p                                  | 1 |
| <i>circCSMD3</i> | miR-3074-3p                                  | 1 |
| <i>circCSMD3</i> | miR-3074-5p                                  | 1 |
| <i>circCSMD3</i> | miR-30b-3p/1273h-5p/3689-3p/6779-5p/6780a-5p |   |
| <i>circCSMD3</i> | miR-30c-3p/6788-5p                           | 1 |
| <i>circCSMD3</i> | miR-3117-5p                                  | 2 |
| <i>circCSMD3</i> | miR-3119                                     | 2 |
| <i>circCSMD3</i> | miR-3120-3p                                  | 1 |
| <i>circCSMD3</i> | miR-3123                                     | 2 |
| <i>circCSMD3</i> | miR-3124-3p                                  | 1 |
| <i>circCSMD3</i> | miR-3125/3916/6859-5p                        | 2 |
| <i>circCSMD3</i> | miR-3126-3p                                  | 1 |
| <i>circCSMD3</i> | miR-3128                                     | 3 |
| <i>circCSMD3</i> | miR-3130-5p/4482-5p                          | 2 |



|                  |                     |   |
|------------------|---------------------|---|
| <i>circCSMD3</i> | miR-3133            | 1 |
| <i>circCSMD3</i> | miR-3134            | 5 |
| <i>circCSMD3</i> | miR-3136-5p/4439    | 1 |
| <i>circCSMD3</i> | miR-3137            | 1 |
| <i>circCSMD3</i> | miR-3140-3p         | 3 |
| <i>circCSMD3</i> | miR-3140-5p         | 1 |
| <i>circCSMD3</i> | miR-3144-5p         | 1 |
| <i>circCSMD3</i> | miR-3145-3p         | 1 |
| <i>circCSMD3</i> | miR-3145-5p         | 2 |
| <i>circCSMD3</i> | miR-3149            | 1 |
| <i>circCSMD3</i> | miR-3150a-3p        | 2 |
| <i>circCSMD3</i> | miR-3151-3p         | 3 |
| <i>circCSMD3</i> | miR-3152-3p         | 1 |
| <i>circCSMD3</i> | miR-3152-5p         | 1 |
| <i>circCSMD3</i> | miR-3164            | 1 |
| <i>circCSMD3</i> | miR-3165            | 1 |
| <i>circCSMD3</i> | miR-3166            | 1 |
| <i>circCSMD3</i> | miR-3173-3p/6891-5p | 2 |
| <i>circCSMD3</i> | miR-3174            | 1 |
| <i>circCSMD3</i> | miR-3182            | 1 |
| <i>circCSMD3</i> | miR-3185            | 1 |
| <i>circCSMD3</i> | miR-3187-3p         | 2 |
| <i>circCSMD3</i> | miR-3188            | 1 |
| <i>circCSMD3</i> | miR-3189-3p         | 1 |
| <i>circCSMD3</i> | miR-3191-3p         | 1 |
| <i>circCSMD3</i> | miR-3192-3p         | 1 |
| <i>circCSMD3</i> | miR-3192-5p         | 1 |
| <i>circCSMD3</i> | miR-3193            | 1 |
| <i>circCSMD3</i> | miR-3199/8052       | 1 |
| <i>circCSMD3</i> | miR-32-3p           | 1 |
| <i>circCSMD3</i> | miR-3200-5p         | 1 |
| <i>circCSMD3</i> | miR-3201/4791       | 1 |
| <i>circCSMD3</i> | miR-325             | 1 |
| <i>circCSMD3</i> | miR-328-3p          | 1 |
| <i>circCSMD3</i> | miR-329-5p          | 1 |
| <i>circCSMD3</i> | miR-33-5p           | 3 |
| <i>circCSMD3</i> | miR-330-3p          | 1 |
| <i>circCSMD3</i> | miR-330-3p.2        | 2 |

|                  |                       |   |
|------------------|-----------------------|---|
| <i>circCSMD3</i> | miR-335-3p            | 6 |
| <i>circCSMD3</i> | miR-338-5p            | 2 |
| <i>circCSMD3</i> | miR-339-5p            | 1 |
| <i>circCSMD3</i> | miR-34-5p/449-5p      | 1 |
| <i>circCSMD3</i> | miR-340-5p            | 1 |
| <i>circCSMD3</i> | miR-345-3p            | 1 |
| <i>circCSMD3</i> | miR-34b-5p/449c-5p    | 1 |
| <i>circCSMD3</i> | miR-3591-5p           | 1 |
| <i>circCSMD3</i> | miR-3607-5p           | 1 |
| <i>circCSMD3</i> | miR-361-3p            | 1 |
| <i>circCSMD3</i> | miR-361-5p            | 1 |
| <i>circCSMD3</i> | miR-3610              | 1 |
| <i>circCSMD3</i> | miR-3612              | 1 |
| <i>circCSMD3</i> | miR-3614-3p           | 1 |
| <i>circCSMD3</i> | miR-3619-3p           | 1 |
| <i>circCSMD3</i> | miR-362-5p/500b-5p    | 1 |
| <i>circCSMD3</i> | miR-3622a-3p/3622b-3p | 2 |
| <i>circCSMD3</i> | miR-3622b-5p          | 1 |
| <i>circCSMD3</i> | miR-3646              | 1 |
| <i>circCSMD3</i> | miR-3651              | 2 |
| <i>circCSMD3</i> | miR-3653-5p           | 1 |
| <i>circCSMD3</i> | miR-3654              | 2 |
| <i>circCSMD3</i> | miR-3655              | 1 |
| <i>circCSMD3</i> | miR-365a-5p/365b-5p   | 1 |
| <i>circCSMD3</i> | miR-3662              | 1 |
| <i>circCSMD3</i> | miR-3667-5p           | 1 |
| <i>circCSMD3</i> | miR-3668              | 1 |
| <i>circCSMD3</i> | miR-367-5p            | 2 |
| <i>circCSMD3</i> | miR-3671              | 1 |
| <i>circCSMD3</i> | miR-3675-3p           | 1 |
| <i>circCSMD3</i> | miR-3675-5p           | 1 |
| <i>circCSMD3</i> | miR-3678-3p           | 1 |
| <i>circCSMD3</i> | miR-3680-3p           | 2 |
| <i>circCSMD3</i> | miR-3680-5p           | 1 |
| <i>circCSMD3</i> | miR-3681-5p           | 3 |
| <i>circCSMD3</i> | miR-3682-3p           | 3 |
| <i>circCSMD3</i> | miR-3682-5p           | 1 |
| <i>circCSMD3</i> | miR-3686              | 1 |

|                  |                           |   |
|------------------|---------------------------|---|
| <i>circCSMD3</i> | miR-3688-3p               | 4 |
| <i>circCSMD3</i> | miR-3689d/6851-5p         | 1 |
| <i>circCSMD3</i> | miR-3690                  | 3 |
| <i>circCSMD3</i> | miR-3691-3p               | 2 |
| <i>circCSMD3</i> | miR-3691-5p               | 3 |
| <i>circCSMD3</i> | miR-3692-3p               | 1 |
| <i>circCSMD3</i> | miR-370-3p                | 1 |
| <i>circCSMD3</i> | miR-371-5p                | 1 |
| <i>circCSMD3</i> | miR-371b-5p/373-5p/616-5p | 1 |
| <i>circCSMD3</i> | miR-372-5p                | 1 |
| <i>circCSMD3</i> | miR-374-5p                | 1 |
| <i>circCSMD3</i> | miR-374b-3p               | 3 |
| <i>circCSMD3</i> | miR-374c-3p               | 1 |
| <i>circCSMD3</i> | miR-376-3p                | 1 |
| <i>circCSMD3</i> | miR-376b-5p/376c-5p       | 1 |
| <i>circCSMD3</i> | miR-377-5p/6086           | 1 |
| <i>circCSMD3</i> | miR-378-3p                | 2 |
| <i>circCSMD3</i> | miR-378a-5p               | 1 |
| <i>circCSMD3</i> | miR-378j/6839-5p          | 3 |
| <i>circCSMD3</i> | miR-379-5p                | 2 |
| <i>circCSMD3</i> | miR-380-3p                | 1 |
| <i>circCSMD3</i> | miR-380-5p/563            | 1 |
| <i>circCSMD3</i> | miR-381-3p                | 2 |
| <i>circCSMD3</i> | miR-382-5p                | 1 |
| <i>circCSMD3</i> | miR-3919                  | 2 |
| <i>circCSMD3</i> | miR-3920                  | 2 |
| <i>circCSMD3</i> | miR-3924                  | 1 |
| <i>circCSMD3</i> | miR-3925-3p               | 2 |
| <i>circCSMD3</i> | miR-3925-5p               | 2 |
| <i>circCSMD3</i> | miR-3926                  | 1 |
| <i>circCSMD3</i> | miR-3927-3p/6831-5p       | 2 |
| <i>circCSMD3</i> | miR-3928-3p               | 1 |
| <i>circCSMD3</i> | miR-3935                  | 1 |
| <i>circCSMD3</i> | miR-3942-3p               | 3 |
| <i>circCSMD3</i> | miR-3973                  | 1 |
| <i>circCSMD3</i> | miR-3975                  | 1 |
| <i>circCSMD3</i> | miR-3976                  | 1 |
| <i>circCSMD3</i> | miR-3977                  | 1 |

|                  |                   |   |
|------------------|-------------------|---|
| <i>circCSMD3</i> | miR-409-3p        | 1 |
| <i>circCSMD3</i> | miR-410-3p        | 1 |
| <i>circCSMD3</i> | miR-411-3p        | 1 |
| <i>circCSMD3</i> | miR-421           | 2 |
| <i>circCSMD3</i> | miR-425-5p        | 1 |
| <i>circCSMD3</i> | miR-4251          | 1 |
| <i>circCSMD3</i> | miR-4252          | 2 |
| <i>circCSMD3</i> | miR-4254          | 3 |
| <i>circCSMD3</i> | miR-4255          | 1 |
| <i>circCSMD3</i> | miR-4259          | 2 |
| <i>circCSMD3</i> | miR-4263          | 2 |
| <i>circCSMD3</i> | miR-4269/6715b-5p | 2 |
| <i>circCSMD3</i> | miR-4272          | 1 |
| <i>circCSMD3</i> | miR-4273/7156-5p  | 1 |
| <i>circCSMD3</i> | miR-4274          | 1 |
| <i>circCSMD3</i> | miR-4276          | 1 |
| <i>circCSMD3</i> | miR-4279          | 2 |
| <i>circCSMD3</i> | miR-4281          | 1 |
| <i>circCSMD3</i> | miR-4289          | 1 |
| <i>circCSMD3</i> | miR-4301          | 1 |
| <i>circCSMD3</i> | miR-4302          | 1 |
| <i>circCSMD3</i> | miR-4303          | 1 |
| <i>circCSMD3</i> | miR-431-3p        | 1 |
| <i>circCSMD3</i> | miR-4312          | 2 |
| <i>circCSMD3</i> | miR-4313          | 1 |
| <i>circCSMD3</i> | miR-4314          | 1 |
| <i>circCSMD3</i> | miR-4316          | 1 |
| <i>circCSMD3</i> | miR-4318          | 2 |
| <i>circCSMD3</i> | miR-432-3p        | 2 |
| <i>circCSMD3</i> | miR-432-5p        | 2 |
| <i>circCSMD3</i> | miR-4327          | 1 |
| <i>circCSMD3</i> | miR-4328          | 6 |
| <i>circCSMD3</i> | miR-4329          | 1 |
| <i>circCSMD3</i> | miR-4422          | 2 |
| <i>circCSMD3</i> | miR-4423-5p       | 1 |
| <i>circCSMD3</i> | miR-4424          | 1 |
| <i>circCSMD3</i> | miR-4427          | 2 |
| <i>circCSMD3</i> | miR-4428          | 2 |

|                  |                    |   |
|------------------|--------------------|---|
| <i>circCSMD3</i> | miR-4434/4516/5703 | 2 |
| <i>circCSMD3</i> | miR-4435           | 2 |
| <i>circCSMD3</i> | miR-4436b-5p       | 1 |
| <i>circCSMD3</i> | miR-4440           | 1 |
| <i>circCSMD3</i> | miR-4443           | 2 |
| <i>circCSMD3</i> | miR-4450           | 1 |
| <i>circCSMD3</i> | miR-4451           | 2 |
| <i>circCSMD3</i> | miR-4452           | 3 |
| <i>circCSMD3</i> | miR-4453/4538      | 1 |
| <i>circCSMD3</i> | miR-4460           | 2 |
| <i>circCSMD3</i> | miR-4461           | 1 |
| <i>circCSMD3</i> | miR-4462           | 1 |
| <i>circCSMD3</i> | miR-4463           | 1 |
| <i>circCSMD3</i> | miR-4464/4748      | 1 |
| <i>circCSMD3</i> | miR-4474-3p        | 1 |
| <i>circCSMD3</i> | miR-4476/6876-5p   | 1 |
| <i>circCSMD3</i> | miR-4480           | 1 |
| <i>circCSMD3</i> | miR-4491/4657      | 4 |
| <i>circCSMD3</i> | miR-4494           | 3 |
| <i>circCSMD3</i> | miR-4496           | 2 |
| <i>circCSMD3</i> | miR-4499           | 1 |
| <i>circCSMD3</i> | miR-449c-3p        | 1 |
| <i>circCSMD3</i> | miR-4501           | 1 |
| <i>circCSMD3</i> | miR-4506           | 2 |
| <i>circCSMD3</i> | miR-450b-5p        | 2 |
| <i>circCSMD3</i> | miR-4514/4692      | 2 |
| <i>circCSMD3</i> | miR-4517           | 1 |
| <i>circCSMD3</i> | miR-4519           | 1 |
| <i>circCSMD3</i> | miR-452-3p         | 4 |
| <i>circCSMD3</i> | miR-452-5p/892-3p  | 2 |
| <i>circCSMD3</i> | miR-4520-2-3p      | 2 |
| <i>circCSMD3</i> | miR-4520-5p        | 2 |
| <i>circCSMD3</i> | miR-4524-5p        | 2 |
| <i>circCSMD3</i> | miR-4524b-3p       | 2 |
| <i>circCSMD3</i> | miR-4529-3p        | 2 |
| <i>circCSMD3</i> | miR-4534/8082      | 5 |
| <i>circCSMD3</i> | miR-4535           | 1 |
| <i>circCSMD3</i> | miR-455-3p.2       | 2 |

|                  |                             |   |
|------------------|-----------------------------|---|
| <i>circCSMD3</i> | miR-4638-3p                 | 2 |
| <i>circCSMD3</i> | miR-4642                    | 2 |
| <i>circCSMD3</i> | miR-4645-3p                 | 1 |
| <i>circCSMD3</i> | miR-4645-5p/4673            | 1 |
| <i>circCSMD3</i> | miR-4650-3p                 | 2 |
| <i>circCSMD3</i> | miR-4652-3p                 | 1 |
| <i>circCSMD3</i> | miR-4652-5p                 | 1 |
| <i>circCSMD3</i> | miR-4659a-3p/4659b-3p       | 2 |
| <i>circCSMD3</i> | miR-4660                    | 1 |
| <i>circCSMD3</i> | miR-4661-3p                 | 1 |
| <i>circCSMD3</i> | miR-4662-5p                 | 1 |
| <i>circCSMD3</i> | miR-4666a-3p                | 2 |
| <i>circCSMD3</i> | miR-4666b                   | 1 |
| <i>circCSMD3</i> | miR-4667-5p/4700-5p/8089    | 1 |
| <i>circCSMD3</i> | miR-4668-3p                 | 1 |
| <i>circCSMD3</i> | miR-4670-3p                 | 2 |
| <i>circCSMD3</i> | miR-4677-3p                 | 2 |
| <i>circCSMD3</i> | miR-4677-5p                 | 1 |
| <i>circCSMD3</i> | miR-4679                    | 2 |
| <i>circCSMD3</i> | miR-4680-3p                 | 2 |
| <i>circCSMD3</i> | miR-4683                    | 1 |
| <i>circCSMD3</i> | miR-4684-3p                 | 1 |
| <i>circCSMD3</i> | miR-4685-5p/6837-5p         | 2 |
| <i>circCSMD3</i> | miR-4690-3p/5685            | 2 |
| <i>circCSMD3</i> | miR-4693-3p                 | 1 |
| <i>circCSMD3</i> | miR-4693-5p                 | 1 |
| <i>circCSMD3</i> | miR-4694-3p                 | 1 |
| <i>circCSMD3</i> | miR-4695-3p                 | 1 |
| <i>circCSMD3</i> | miR-4700-3p                 | 1 |
| <i>circCSMD3</i> | miR-4704-3p                 | 1 |
| <i>circCSMD3</i> | miR-4708-5p                 | 1 |
| <i>circCSMD3</i> | miR-4709-5p                 | 2 |
| <i>circCSMD3</i> | miR-4711-5p                 | 1 |
| <i>circCSMD3</i> | miR-4715-3p                 | 2 |
| <i>circCSMD3</i> | miR-4715-5p                 | 2 |
| <i>circCSMD3</i> | miR-4717-3p                 | 2 |
| <i>circCSMD3</i> | miR-4718                    | 1 |
| <i>circCSMD3</i> | miR-4720-5p/4799-3p/5588-5p | 3 |

|                  |                     |   |
|------------------|---------------------|---|
| <i>circCSMD3</i> | miR-4724-3p         | 1 |
| <i>circCSMD3</i> | miR-4724-5p         | 2 |
| <i>circCSMD3</i> | miR-4726-3p         | 2 |
| <i>circCSMD3</i> | miR-4727-3p         | 2 |
| <i>circCSMD3</i> | miR-4728-3p         | 2 |
| <i>circCSMD3</i> | miR-4733-3p         | 4 |
| <i>circCSMD3</i> | miR-4735-5p         | 1 |
| <i>circCSMD3</i> | miR-4737            | 1 |
| <i>circCSMD3</i> | miR-4742-3p         | 2 |
| <i>circCSMD3</i> | miR-4742-5p         | 2 |
| <i>circCSMD3</i> | miR-4743-3p         | 1 |
| <i>circCSMD3</i> | miR-4746-5p         | 1 |
| <i>circCSMD3</i> | miR-4752            | 4 |
| <i>circCSMD3</i> | miR-4753-3p         | 1 |
| <i>circCSMD3</i> | miR-4755-5p/5006-3p | 1 |
| <i>circCSMD3</i> | miR-4756-3p         | 2 |
| <i>circCSMD3</i> | miR-4760-3p         | 4 |
| <i>circCSMD3</i> | miR-4761-5p         | 1 |
| <i>circCSMD3</i> | miR-4762-5p         | 1 |
| <i>circCSMD3</i> | miR-4765            | 1 |
| <i>circCSMD3</i> | miR-4766-3p         | 1 |
| <i>circCSMD3</i> | miR-4771            | 1 |
| <i>circCSMD3</i> | miR-4774-3p         | 1 |
| <i>circCSMD3</i> | miR-4776-3p         | 3 |
| <i>circCSMD3</i> | miR-4776-5p         | 1 |
| <i>circCSMD3</i> | miR-4777-5p         | 1 |
| <i>circCSMD3</i> | miR-4778-3p         | 1 |
| <i>circCSMD3</i> | miR-4778-5p         | 1 |
| <i>circCSMD3</i> | miR-4781-3p         | 1 |
| <i>circCSMD3</i> | miR-4782-5p/5706    | 2 |
| <i>circCSMD3</i> | miR-4788            | 1 |
| <i>circCSMD3</i> | miR-4790-3p         | 3 |
| <i>circCSMD3</i> | miR-4798-3p         | 1 |
| <i>circCSMD3</i> | miR-4798-5p         | 1 |
| <i>circCSMD3</i> | miR-4799-5p         | 1 |
| <i>circCSMD3</i> | miR-484/3155        | 1 |
| <i>circCSMD3</i> | miR-485-5p          | 1 |
| <i>circCSMD3</i> | miR-486-5p          | 1 |

|                  |                     |   |
|------------------|---------------------|---|
| <i>circCSMD3</i> | miR-487a-5p/487b-5p | 1 |
| <i>circCSMD3</i> | miR-490-3p          | 3 |
| <i>circCSMD3</i> | miR-495-5p          | 1 |
| <i>circCSMD3</i> | miR-498             | 3 |
| <i>circCSMD3</i> | miR-4999-5p         | 1 |
| <i>circCSMD3</i> | miR-499b-5p         | 3 |
| <i>circCSMD3</i> | miR-5002-5p         | 2 |
| <i>circCSMD3</i> | miR-5003-3p         | 2 |
| <i>circCSMD3</i> | miR-5007-5p         | 1 |
| <i>circCSMD3</i> | miR-5009-5p/8058    | 2 |
| <i>circCSMD3</i> | miR-501-5p          | 1 |
| <i>circCSMD3</i> | miR-5010-3p         | 1 |
| <i>circCSMD3</i> | miR-5011-3p         | 1 |
| <i>circCSMD3</i> | miR-502-5p          | 1 |
| <i>circCSMD3</i> | miR-503-5p          | 1 |
| <i>circCSMD3</i> | miR-504-3p          | 1 |
| <i>circCSMD3</i> | miR-504-5p.1        | 1 |
| <i>circCSMD3</i> | miR-505-3p.1        | 1 |
| <i>circCSMD3</i> | miR-505-3p.2        | 2 |
| <i>circCSMD3</i> | miR-506-5p          | 4 |
| <i>circCSMD3</i> | miR-507/557         | 2 |
| <i>circCSMD3</i> | miR-508-5p          | 2 |
| <i>circCSMD3</i> | miR-509-3p          | 2 |
| <i>circCSMD3</i> | miR-5093            | 2 |
| <i>circCSMD3</i> | miR-5096            | 3 |
| <i>circCSMD3</i> | miR-510-5p          | 1 |
| <i>circCSMD3</i> | miR-5100            | 2 |
| <i>circCSMD3</i> | miR-514a-3p         | 1 |
| <i>circCSMD3</i> | miR-516b-5p         | 2 |
| <i>circCSMD3</i> | miR-5187-3p         | 2 |
| <i>circCSMD3</i> | miR-5187-5p         | 1 |
| <i>circCSMD3</i> | miR-5189-3p         | 1 |
| <i>circCSMD3</i> | miR-518d-5p/519-5p  | 1 |
| <i>circCSMD3</i> | miR-5190            | 1 |
| <i>circCSMD3</i> | miR-5191            | 1 |
| <i>circCSMD3</i> | miR-5192            | 1 |
| <i>circCSMD3</i> | miR-5197-5p         | 2 |
| <i>circCSMD3</i> | miR-520f-5p         | 1 |



|                  |                                               |   |
|------------------|-----------------------------------------------|---|
| <i>circCSMD3</i> | miR-520g-3p                                   | 1 |
| <i>circCSMD3</i> | miR-522-3p                                    | 1 |
| <i>circCSMD3</i> | miR-524-5p                                    | 1 |
| <i>circCSMD3</i> | miR-525-5p                                    | 1 |
| <i>circCSMD3</i> | miR-545-3p                                    | 2 |
| <i>circCSMD3</i> | miR-545-5p                                    | 1 |
| <i>circCSMD3</i> | miR-548ao-3p                                  | 1 |
| <i>circCSMD3</i> | miR-548au-3p                                  | 1 |
| <i>circCSMD3</i> | miR-548av-3p                                  | 1 |
| <i>circCSMD3</i> | miR-548az-3p/548ar-3p/548a-3p/548e-3p/548f-3p | 1 |
| <i>circCSMD3</i> | miR-548p                                      | 1 |
| <i>circCSMD3</i> | miR-548s                                      | 2 |
| <i>circCSMD3</i> | miR-552-5p                                    | 1 |
| <i>circCSMD3</i> | miR-556-3p                                    | 1 |
| <i>circCSMD3</i> | miR-5579-3p                                   | 1 |
| <i>circCSMD3</i> | miR-5582-3p                                   | 1 |
| <i>circCSMD3</i> | miR-5583-3p                                   | 1 |
| <i>circCSMD3</i> | miR-5586-5p                                   | 3 |
| <i>circCSMD3</i> | miR-5591-3p                                   | 2 |
| <i>circCSMD3</i> | miR-561-5p                                    | 2 |
| <i>circCSMD3</i> | miR-567                                       | 1 |
| <i>circCSMD3</i> | miR-568                                       | 1 |
| <i>circCSMD3</i> | miR-5682                                      | 1 |
| <i>circCSMD3</i> | miR-5684                                      | 1 |
| <i>circCSMD3</i> | miR-5687                                      | 1 |
| <i>circCSMD3</i> | miR-569                                       | 1 |
| <i>circCSMD3</i> | miR-5696                                      | 3 |
| <i>circCSMD3</i> | miR-5700                                      | 2 |
| <i>circCSMD3</i> | miR-571                                       | 2 |
| <i>circCSMD3</i> | miR-575/4676-5p                               | 1 |
| <i>circCSMD3</i> | miR-576-5p                                    | 2 |
| <i>circCSMD3</i> | miR-578                                       | 2 |
| <i>circCSMD3</i> | miR-579-3p                                    | 3 |
| <i>circCSMD3</i> | miR-580-5p                                    | 3 |
| <i>circCSMD3</i> | miR-582-3p                                    | 2 |
| <i>circCSMD3</i> | miR-585-5p                                    | 1 |
| <i>circCSMD3</i> | miR-586                                       | 2 |
| <i>circCSMD3</i> | miR-587                                       | 1 |

|                  |                    |   |
|------------------|--------------------|---|
| <i>circCSMD3</i> | miR-588            | 2 |
| <i>circCSMD3</i> | miR-589-5p         | 1 |
| <i>circCSMD3</i> | miR-590-3p         | 2 |
| <i>circCSMD3</i> | miR-592            | 1 |
| <i>circCSMD3</i> | miR-593-5p         | 1 |
| <i>circCSMD3</i> | miR-597-3p         | 1 |
| <i>circCSMD3</i> | miR-599            | 1 |
| <i>circCSMD3</i> | miR-600            | 1 |
| <i>circCSMD3</i> | miR-602            | 1 |
| <i>circCSMD3</i> | miR-6068           | 1 |
| <i>circCSMD3</i> | miR-607            | 1 |
| <i>circCSMD3</i> | miR-6072/6891-3p   | 1 |
| <i>circCSMD3</i> | miR-6073           | 1 |
| <i>circCSMD3</i> | miR-6077           | 3 |
| <i>circCSMD3</i> | miR-6079           | 3 |
| <i>circCSMD3</i> | miR-6083           | 1 |
| <i>circCSMD3</i> | miR-6125           | 1 |
| <i>circCSMD3</i> | miR-6126           | 1 |
| <i>circCSMD3</i> | miR-6131           | 1 |
| <i>circCSMD3</i> | miR-615-5p         | 1 |
| <i>circCSMD3</i> | miR-616-3p         | 1 |
| <i>circCSMD3</i> | miR-617            | 1 |
| <i>circCSMD3</i> | miR-619-3p         | 3 |
| <i>circCSMD3</i> | miR-619-5p/6506-5p | 1 |
| <i>circCSMD3</i> | miR-622            | 1 |
| <i>circCSMD3</i> | miR-627-3p         | 4 |
| <i>circCSMD3</i> | miR-628-3p         | 1 |
| <i>circCSMD3</i> | miR-631/3661       | 1 |
| <i>circCSMD3</i> | miR-632/4288       | 1 |
| <i>circCSMD3</i> | miR-633            | 1 |
| <i>circCSMD3</i> | miR-637            | 1 |
| <i>circCSMD3</i> | miR-640            | 2 |
| <i>circCSMD3</i> | miR-641/3617-5p    | 2 |
| <i>circCSMD3</i> | miR-642a-5p        | 1 |
| <i>circCSMD3</i> | miR-643            | 1 |
| <i>circCSMD3</i> | miR-646            | 1 |
| <i>circCSMD3</i> | miR-649            | 3 |
| <i>circCSMD3</i> | miR-6501-5p        | 1 |

|                  |                     |   |
|------------------|---------------------|---|
| <i>circCSMD3</i> | miR-6503-3p         | 1 |
| <i>circCSMD3</i> | miR-6505-3p         | 1 |
| <i>circCSMD3</i> | miR-6505-5p         | 3 |
| <i>circCSMD3</i> | miR-6507-3p         | 1 |
| <i>circCSMD3</i> | miR-6507-5p         | 2 |
| <i>circCSMD3</i> | miR-6508-5p/8067    | 1 |
| <i>circCSMD3</i> | miR-6509-3p         | 1 |
| <i>circCSMD3</i> | miR-651-3p          | 2 |
| <i>circCSMD3</i> | miR-6511-3p         | 1 |
| <i>circCSMD3</i> | miR-6515-5p         | 2 |
| <i>circCSMD3</i> | miR-6516-5p         | 1 |
| <i>circCSMD3</i> | miR-655-5p          | 1 |
| <i>circCSMD3</i> | miR-656-3p          | 1 |
| <i>circCSMD3</i> | miR-659-3p          | 1 |
| <i>circCSMD3</i> | miR-663b            | 2 |
| <i>circCSMD3</i> | miR-664a-3p         | 1 |
| <i>circCSMD3</i> | miR-664a-5p/4794    | 1 |
| <i>circCSMD3</i> | miR-665             | 1 |
| <i>circCSMD3</i> | miR-670-3p          | 2 |
| <i>circCSMD3</i> | miR-671-5p          | 1 |
| <i>circCSMD3</i> | miR-6731-3p         | 1 |
| <i>circCSMD3</i> | miR-6731-5p/8085    | 1 |
| <i>circCSMD3</i> | miR-6733-3p         | 1 |
| <i>circCSMD3</i> | miR-6736-3p         | 1 |
| <i>circCSMD3</i> | miR-6742-3p         | 1 |
| <i>circCSMD3</i> | miR-6744-5p         | 2 |
| <i>circCSMD3</i> | miR-675-3p          | 1 |
| <i>circCSMD3</i> | miR-6755-3p         | 1 |
| <i>circCSMD3</i> | miR-6757-3p         | 2 |
| <i>circCSMD3</i> | miR-6758-5p/6856-5p | 1 |
| <i>circCSMD3</i> | miR-676-5p          | 4 |
| <i>circCSMD3</i> | miR-6760-3p         | 2 |
| <i>circCSMD3</i> | miR-6761-5p         | 1 |
| <i>circCSMD3</i> | miR-6765-3p         | 2 |
| <i>circCSMD3</i> | miR-6765-5p         | 1 |
| <i>circCSMD3</i> | miR-6774-3p         | 1 |
| <i>circCSMD3</i> | miR-6780a-3p        | 1 |
| <i>circCSMD3</i> | miR-6782-5p         | 1 |

|                  |                     |   |
|------------------|---------------------|---|
| <i>circCSMD3</i> | miR-6784-3p/6862-3p | 1 |
| <i>circCSMD3</i> | miR-6798-5p         | 1 |
| <i>circCSMD3</i> | miR-6802-3p         | 1 |
| <i>circCSMD3</i> | miR-6808-3p         | 2 |
| <i>circCSMD3</i> | miR-6810-5p         | 2 |
| <i>circCSMD3</i> | miR-6821-5p         | 1 |
| <i>circCSMD3</i> | miR-6822-3p         | 1 |
| <i>circCSMD3</i> | miR-6828-5p         | 1 |
| <i>circCSMD3</i> | miR-6830-5p         | 1 |
| <i>circCSMD3</i> | miR-6833-5p         | 4 |
| <i>circCSMD3</i> | miR-6838-3p         | 1 |
| <i>circCSMD3</i> | miR-6840-3p         | 2 |
| <i>circCSMD3</i> | miR-6841-3p         | 2 |
| <i>circCSMD3</i> | miR-6844            | 2 |
| <i>circCSMD3</i> | miR-6849-3p         | 1 |
| <i>circCSMD3</i> | miR-6852-5p         | 1 |
| <i>circCSMD3</i> | miR-6853-3p         | 2 |
| <i>circCSMD3</i> | miR-6854-5p         | 1 |
| <i>circCSMD3</i> | miR-6857-5p         | 2 |
| <i>circCSMD3</i> | miR-6858-3p         | 1 |
| <i>circCSMD3</i> | miR-6864-5p         | 1 |
| <i>circCSMD3</i> | miR-6865-3p         | 2 |
| <i>circCSMD3</i> | miR-6868-5p         | 3 |
| <i>circCSMD3</i> | miR-6870-3p         | 1 |
| <i>circCSMD3</i> | miR-6871-3p         | 2 |
| <i>circCSMD3</i> | miR-6871-5p         | 2 |
| <i>circCSMD3</i> | miR-6875-3p         | 2 |
| <i>circCSMD3</i> | miR-6878-3p         | 1 |
| <i>circCSMD3</i> | miR-6878-5p         | 1 |
| <i>circCSMD3</i> | miR-6879-3p         | 1 |
| <i>circCSMD3</i> | miR-6880-5p         | 1 |
| <i>circCSMD3</i> | miR-6881-3p         | 1 |
| <i>circCSMD3</i> | miR-6884-3p         | 1 |
| <i>circCSMD3</i> | miR-6885-3p         | 2 |
| <i>circCSMD3</i> | miR-6888-5p         | 2 |
| <i>circCSMD3</i> | miR-6890-3p         | 1 |
| <i>circCSMD3</i> | miR-6890-5p         | 1 |
| <i>circCSMD3</i> | miR-7-5p            | 3 |

|                  |              |   |
|------------------|--------------|---|
| <i>circCSMD3</i> | miR-7108-5p  | 1 |
| <i>circCSMD3</i> | miR-7111-3p  | 1 |
| <i>circCSMD3</i> | miR-7112-3p  | 1 |
| <i>circCSMD3</i> | miR-7113-5p  | 2 |
| <i>circCSMD3</i> | miR-7114-5p  | 1 |
| <i>circCSMD3</i> | miR-7150     | 1 |
| <i>circCSMD3</i> | miR-7151-5p  | 1 |
| <i>circCSMD3</i> | miR-7152-5p  | 1 |
| <i>circCSMD3</i> | miR-7155-5p  | 1 |
| <i>circCSMD3</i> | miR-7158-3p  | 1 |
| <i>circCSMD3</i> | miR-7158-5p  | 1 |
| <i>circCSMD3</i> | miR-7159-5p  | 2 |
| <i>circCSMD3</i> | miR-744-3p   | 1 |
| <i>circCSMD3</i> | miR-758-5p   | 1 |
| <i>circCSMD3</i> | miR-759      | 2 |
| <i>circCSMD3</i> | miR-760      | 1 |
| <i>circCSMD3</i> | miR-766-3p   | 2 |
| <i>circCSMD3</i> | miR-767-5p   | 1 |
| <i>circCSMD3</i> | miR-770-5p   | 1 |
| <i>circCSMD3</i> | miR-7704     | 1 |
| <i>circCSMD3</i> | miR-7705     | 1 |
| <i>circCSMD3</i> | miR-7844-5p  | 1 |
| <i>circCSMD3</i> | miR-7847-3p  | 6 |
| <i>circCSMD3</i> | miR-7851-3p  | 3 |
| <i>circCSMD3</i> | miR-7852-3p  | 1 |
| <i>circCSMD3</i> | miR-7973     | 2 |
| <i>circCSMD3</i> | miR-802      | 1 |
| <i>circCSMD3</i> | miR-8056     | 3 |
| <i>circCSMD3</i> | miR-8060     | 1 |
| <i>circCSMD3</i> | miR-8062     | 1 |
| <i>circCSMD3</i> | miR-8066     | 2 |
| <i>circCSMD3</i> | miR-8070     | 2 |
| <i>circCSMD3</i> | miR-8071     | 1 |
| <i>circCSMD3</i> | miR-8084     | 1 |
| <i>circCSMD3</i> | miR-8086     | 1 |
| <i>circCSMD3</i> | miR-873-3p   | 1 |
| <i>circCSMD3</i> | miR-873-5p.1 | 1 |
| <i>circCSMD3</i> | miR-874-5p   | 1 |

|                  |                          |   |
|------------------|--------------------------|---|
| <i>circCSMD3</i> | miR-875-3p               | 2 |
| <i>circCSMD3</i> | miR-876-5p               | 3 |
| <i>circCSMD3</i> | miR-885-3p               | 1 |
| <i>circCSMD3</i> | miR-889-3p               | 1 |
| <i>circCSMD3</i> | miR-890                  | 1 |
| <i>circCSMD3</i> | miR-892-5p               | 4 |
| <i>circCSMD3</i> | miR-892a                 | 2 |
| <i>circCSMD3</i> | miR-892b                 | 4 |
| <i>circCSMD3</i> | miR-924                  | 1 |
| <i>circCSMD3</i> | miR-92b-5p               | 1 |
| <i>circCSMD3</i> | miR-935                  | 2 |
| <i>circCSMD3</i> | miR-939-3p               | 1 |
| <i>circCSMD3</i> | miR-940/6808-5p/6893-5p  | 1 |
| <i>circCSMD3</i> | miR-941                  | 1 |
| <i>circCSMD3</i> | miR-943                  | 1 |
| <i>circCSMD3</i> | miR-95-5p                | 1 |
| <i>circCSMD3</i> | miR-96-3p                | 1 |
| <i>circCSMD3</i> | let-7a-2-3p/let-7g-3p    | 2 |
| <i>circCSMD3</i> | let-7c-3p                | 2 |
| <i>circCSMD3</i> | miR-101-3p.2             | 1 |
| <i>circCSMD3</i> | miR-105-5p               | 1 |
| <i>circCSMD3</i> | miR-1181                 | 1 |
| <i>circCSMD3</i> | miR-1233-3p              | 1 |
| <i>circCSMD3</i> | miR-1236-3p              | 1 |
| <i>circCSMD3</i> | miR-1237-3p              | 3 |
| <i>circCSMD3</i> | miR-1248                 | 3 |
| <i>circCSMD3</i> | miR-1255b-2-3p           | 3 |
| <i>circCSMD3</i> | miR-1256                 | 1 |
| <i>circCSMD3</i> | miR-125b-1-3p            | 2 |
| <i>circCSMD3</i> | miR-125b-2-3p            | 2 |
| <i>circCSMD3</i> | miR-1273d                | 2 |
| <i>circCSMD3</i> | miR-1273e                | 1 |
| <i>circCSMD3</i> | miR-1288-3p              | 2 |
| <i>circCSMD3</i> | miR-1288-5p              | 1 |
| <i>circCSMD3</i> | miR-1289                 | 1 |
| <i>circCSMD3</i> | miR-130-3p/301-3p/454-3p | 1 |
| <i>circCSMD3</i> | miR-1301-5p/6502-5p      | 1 |
| <i>circCSMD3</i> | miR-1303                 | 1 |

|                  |                                 |   |
|------------------|---------------------------------|---|
| <i>circCSMD3</i> | miR-136-5p                      | 1 |
| <i>circCSMD3</i> | miR-138-2-3p                    | 2 |
| <i>circCSMD3</i> | miR-141-5p                      | 1 |
| <i>circCSMD3</i> | miR-147a                        | 1 |
| <i>circCSMD3</i> | miR-148a-5p                     | 2 |
| <i>circCSMD3</i> | miR-154-3p/487-3p               | 1 |
| <i>circCSMD3</i> | miR-18-5p                       | 2 |
| <i>circCSMD3</i> | miR-181-5p                      | 1 |
| <i>circCSMD3</i> | miR-182-3p                      | 1 |
| <i>circCSMD3</i> | miR-1909-5p                     | 1 |
| <i>circCSMD3</i> | miR-190a-3p                     | 1 |
| <i>circCSMD3</i> | miR-192-5p/215-5p               | 2 |
| <i>circCSMD3</i> | miR-193-3p                      | 1 |
| <i>circCSMD3</i> | miR-2053                        | 2 |
| <i>circCSMD3</i> | miR-210-5p                      | 1 |
| <i>circCSMD3</i> | miR-215-3p                      | 2 |
| <i>circCSMD3</i> | miR-216b-3p                     | 1 |
| <i>circCSMD3</i> | miR-218-1-3p                    | 1 |
| <i>circCSMD3</i> | miR-218-2-3p                    | 1 |
| <i>circCSMD3</i> | miR-219a-2-3p                   | 2 |
| <i>circCSMD3</i> | miR-219b-3p                     | 2 |
| <i>circCSMD3</i> | miR-223-5p                      | 2 |
| <i>circCSMD3</i> | miR-24-3p                       | 1 |
| <i>circCSMD3</i> | miR-2681-5p                     | 1 |
| <i>circCSMD3</i> | miR-27-3p                       | 2 |
| <i>circCSMD3</i> | miR-2861                        | 1 |
| <i>circCSMD3</i> | miR-299-5p                      | 1 |
| <i>circCSMD3</i> | miR-29a-5p                      | 3 |
| <i>circCSMD3</i> | miR-29b-2-5p                    | 1 |
| <i>circCSMD3</i> | miR-30-3p                       | 6 |
| <i>circCSMD3</i> | miR-301a-5p/301b-5p             | 3 |
| <i>circCSMD3</i> | miR-302-3p/372-3p/373-3p/520-3p | 1 |
| <i>circCSMD3</i> | miR-302a-5p                     | 1 |
| <i>circCSMD3</i> | miR-302f                        | 2 |
| <i>circCSMD3</i> | miR-31-3p                       | 2 |
| <i>circCSMD3</i> | miR-31-5p                       | 1 |
| <i>circCSMD3</i> | miR-3120-5p                     | 2 |
| <i>circCSMD3</i> | miR-3121-3p                     | 1 |

|                  |                           |   |
|------------------|---------------------------|---|
| <i>circCSMD3</i> | miR-3122/3913-5p          | 1 |
| <i>circCSMD3</i> | miR-3127-3p/6756-3p       | 1 |
| <i>circCSMD3</i> | miR-3127-5p               | 1 |
| <i>circCSMD3</i> | miR-3135a                 | 1 |
| <i>circCSMD3</i> | miR-3143                  | 2 |
| <i>circCSMD3</i> | miR-3144-3p               | 1 |
| <i>circCSMD3</i> | miR-3148                  | 2 |
| <i>circCSMD3</i> | miR-3150b-3p              | 1 |
| <i>circCSMD3</i> | miR-3156-5p               | 1 |
| <i>circCSMD3</i> | miR-3158-3p               | 1 |
| <i>circCSMD3</i> | miR-3159                  | 2 |
| <i>circCSMD3</i> | miR-3171                  | 1 |
| <i>circCSMD3</i> | miR-3189-5p               | 1 |
| <i>circCSMD3</i> | miR-3190-3p               | 1 |
| <i>circCSMD3</i> | miR-3191-5p               | 3 |
| <i>circCSMD3</i> | miR-3198/4309             | 5 |
| <i>circCSMD3</i> | miR-3200-3p               | 2 |
| <i>circCSMD3</i> | miR-3202                  | 1 |
| <i>circCSMD3</i> | miR-323a-5p               | 1 |
| <i>circCSMD3</i> | miR-323b-3p               | 1 |
| <i>circCSMD3</i> | miR-33a-3p                | 1 |
| <i>circCSMD3</i> | miR-33b-3p/515-3p/519e-3p | 1 |
| <i>circCSMD3</i> | miR-3529-3p               | 2 |
| <i>circCSMD3</i> | miR-3607-3p               | 1 |
| <i>circCSMD3</i> | miR-3611                  | 2 |
| <i>circCSMD3</i> | miR-3616-3p               | 1 |
| <i>circCSMD3</i> | miR-3650                  | 2 |
| <i>circCSMD3</i> | miR-3659                  | 1 |
| <i>circCSMD3</i> | miR-3663-5p               | 1 |
| <i>circCSMD3</i> | miR-3664-5p               | 1 |
| <i>circCSMD3</i> | miR-371a-3p               | 1 |
| <i>circCSMD3</i> | miR-371b-3p               | 1 |
| <i>circCSMD3</i> | miR-374a-3p               | 1 |
| <i>circCSMD3</i> | miR-383-5p.2              | 1 |
| <i>circCSMD3</i> | miR-3911                  | 2 |
| <i>circCSMD3</i> | miR-3914                  | 1 |
| <i>circCSMD3</i> | miR-3918                  | 1 |
| <i>circCSMD3</i> | miR-3921/4653-5p          | 3 |



|                  |                     |   |
|------------------|---------------------|---|
| <i>circCSMD3</i> | miR-3943            | 1 |
| <i>circCSMD3</i> | miR-3944-5p         | 1 |
| <i>circCSMD3</i> | miR-3978            | 4 |
| <i>circCSMD3</i> | miR-409-5p          | 1 |
| <i>circCSMD3</i> | miR-411-5p.2        | 1 |
| <i>circCSMD3</i> | miR-412-3p/6754-3p  | 1 |
| <i>circCSMD3</i> | miR-4256            | 1 |
| <i>circCSMD3</i> | miR-4277            | 2 |
| <i>circCSMD3</i> | miR-4284            | 1 |
| <i>circCSMD3</i> | miR-4292/6791-5p    | 1 |
| <i>circCSMD3</i> | miR-4294            | 1 |
| <i>circCSMD3</i> | miR-4299            | 2 |
| <i>circCSMD3</i> | miR-4308            | 1 |
| <i>circCSMD3</i> | miR-431-5p          | 1 |
| <i>circCSMD3</i> | miR-4323            | 1 |
| <i>circCSMD3</i> | miR-433-3p          | 4 |
| <i>circCSMD3</i> | miR-4437            | 1 |
| <i>circCSMD3</i> | miR-4446-3p         | 1 |
| <i>circCSMD3</i> | miR-4456            | 2 |
| <i>circCSMD3</i> | miR-4482-3p         | 3 |
| <i>circCSMD3</i> | miR-4495            | 2 |
| <i>circCSMD3</i> | miR-4504            | 1 |
| <i>circCSMD3</i> | miR-450a-1-3p       | 1 |
| <i>circCSMD3</i> | miR-450b-3p/769-3p  | 1 |
| <i>circCSMD3</i> | miR-4512            | 1 |
| <i>circCSMD3</i> | miR-4513/6855-3p    | 2 |
| <i>circCSMD3</i> | miR-4515            | 2 |
| <i>circCSMD3</i> | miR-4528            | 2 |
| <i>circCSMD3</i> | miR-4533            | 1 |
| <i>circCSMD3</i> | miR-4539            | 2 |
| <i>circCSMD3</i> | miR-4635            | 1 |
| <i>circCSMD3</i> | miR-4639-3p         | 2 |
| <i>circCSMD3</i> | miR-4640-5p         | 1 |
| <i>circCSMD3</i> | miR-466             | 1 |
| <i>circCSMD3</i> | miR-4666a-5p        | 4 |
| <i>circCSMD3</i> | miR-4684-5p         | 1 |
| <i>circCSMD3</i> | miR-4691-5p/6792-3p | 1 |
| <i>circCSMD3</i> | miR-4694-5p         | 1 |

|                  |                     |   |
|------------------|---------------------|---|
| <i>circCSMD3</i> | miR-4696            | 1 |
| <i>circCSMD3</i> | miR-4699-3p         | 2 |
| <i>circCSMD3</i> | miR-4699-5p         | 1 |
| <i>circCSMD3</i> | miR-4703-3p         | 1 |
| <i>circCSMD3</i> | miR-4705            | 2 |
| <i>circCSMD3</i> | miR-4709-3p         | 3 |
| <i>circCSMD3</i> | miR-4714-3p         | 1 |
| <i>circCSMD3</i> | miR-4714-5p         | 1 |
| <i>circCSMD3</i> | miR-4721            | 1 |
| <i>circCSMD3</i> | miR-4725-5p         | 1 |
| <i>circCSMD3</i> | miR-4727-5p         | 1 |
| <i>circCSMD3</i> | miR-4729            | 1 |
| <i>circCSMD3</i> | miR-4740-5p         | 2 |
| <i>circCSMD3</i> | miR-4749-3p         | 1 |
| <i>circCSMD3</i> | miR-4750-3p         | 2 |
| <i>circCSMD3</i> | miR-4758-3p         | 1 |
| <i>circCSMD3</i> | miR-4768-5p/6833-3p | 3 |
| <i>circCSMD3</i> | miR-4769-3p/6817-5p | 1 |
| <i>circCSMD3</i> | miR-4775            | 2 |
| <i>circCSMD3</i> | miR-4780            | 1 |
| <i>circCSMD3</i> | miR-4797-5p         | 1 |
| <i>circCSMD3</i> | miR-4802-3p         | 3 |
| <i>circCSMD3</i> | miR-4803            | 1 |
| <i>circCSMD3</i> | miR-490-5p          | 2 |
| <i>circCSMD3</i> | miR-493-5p          | 2 |
| <i>circCSMD3</i> | miR-499a-3p/499b-3p | 1 |
| <i>circCSMD3</i> | miR-5000-5p         | 3 |
| <i>circCSMD3</i> | miR-5001-3p         | 1 |
| <i>circCSMD3</i> | miR-5004-3p         | 1 |
| <i>circCSMD3</i> | miR-5007-3p         | 1 |
| <i>circCSMD3</i> | miR-500a-3p         | 2 |
| <i>circCSMD3</i> | miR-500b-3p         | 1 |
| <i>circCSMD3</i> | miR-5088-3p         | 1 |
| <i>circCSMD3</i> | miR-5088-5p         | 1 |
| <i>circCSMD3</i> | miR-5089-5p         | 1 |
| <i>circCSMD3</i> | miR-5092            | 1 |
| <i>circCSMD3</i> | miR-5095/7151-3p    | 1 |
| <i>circCSMD3</i> | miR-511-5p          | 1 |

|                  |                                                                   |   |
|------------------|-------------------------------------------------------------------|---|
| <i>circCSMD3</i> | miR-513a-3p/513c-3p/3606-3p                                       | 1 |
| <i>circCSMD3</i> | miR-513a-5p                                                       | 2 |
| <i>circCSMD3</i> | miR-514a-5p                                                       | 1 |
| <i>circCSMD3</i> | miR-515-5p/519e-5p                                                | 2 |
| <i>circCSMD3</i> | miR-518a-5p/527                                                   | 1 |
| <i>circCSMD3</i> | miR-519-3p                                                        | 1 |
| <i>circCSMD3</i> | miR-519d-5p                                                       | 1 |
| <i>circCSMD3</i> | miR-542-3p                                                        | 1 |
| <i>circCSMD3</i> | miR-543                                                           | 1 |
| <i>circCSMD3</i> | miR-548ac/548bb-3p/548d-3p/548h-3p/548z                           | 1 |
| <i>circCSMD3</i> | miR-548ap-3p/548aa/548t-3p                                        | 2 |
| <i>circCSMD3</i> | miR-548aq-3p/548am-3p/548aj-3p/548ah1-3p/548ae-3p/548j-3p/548x-3p | 1 |
| <i>circCSMD3</i> | miR-548as-3p                                                      | 2 |
| <i>circCSMD3</i> | miR-548at-5p                                                      | 1 |
| <i>circCSMD3</i> | miR-548aw                                                         | 1 |
| <i>circCSMD3</i> | miR-548ay-3p/548at-3p                                             | 2 |
| <i>circCSMD3</i> | miR-548m                                                          | 1 |
| <i>circCSMD3</i> | miR-548q                                                          | 2 |
| <i>circCSMD3</i> | miR-549a                                                          | 2 |
| <i>circCSMD3</i> | miR-550b-3p                                                       | 2 |
| <i>circCSMD3</i> | miR-552-3p                                                        | 2 |
| <i>circCSMD3</i> | miR-5571-5p                                                       | 2 |
| <i>circCSMD3</i> | miR-5579-5p                                                       | 1 |
| <i>circCSMD3</i> | miR-5587-5p                                                       | 1 |
| <i>circCSMD3</i> | miR-561-3p                                                        | 1 |
| <i>circCSMD3</i> | miR-564                                                           | 1 |
| <i>circCSMD3</i> | miR-5689                                                          | 1 |
| <i>circCSMD3</i> | miR-5691                                                          | 1 |
| <i>circCSMD3</i> | miR-5694                                                          | 1 |
| <i>circCSMD3</i> | miR-5695                                                          | 1 |
| <i>circCSMD3</i> | miR-5699-5p                                                       | 1 |
| <i>circCSMD3</i> | miR-5702                                                          | 2 |
| <i>circCSMD3</i> | miR-574-5p                                                        | 1 |
| <i>circCSMD3</i> | miR-576-3p                                                        | 1 |
| <i>circCSMD3</i> | miR-581                                                           | 1 |
| <i>circCSMD3</i> | miR-582-5p                                                        | 1 |
| <i>circCSMD3</i> | miR-584-3p                                                        | 1 |
| <i>circCSMD3</i> | miR-584-5p                                                        | 2 |

|                  |                     |   |
|------------------|---------------------|---|
| <i>circCSMD3</i> | miR-591             | 1 |
| <i>circCSMD3</i> | miR-593-3p          | 1 |
| <i>circCSMD3</i> | miR-6078            | 1 |
| <i>circCSMD3</i> | miR-6080            | 1 |
| <i>circCSMD3</i> | miR-6124            | 2 |
| <i>circCSMD3</i> | miR-6128            | 4 |
| <i>circCSMD3</i> | miR-627-5p          | 1 |
| <i>circCSMD3</i> | miR-629-3p          | 2 |
| <i>circCSMD3</i> | miR-630             | 2 |
| <i>circCSMD3</i> | miR-644a            | 2 |
| <i>circCSMD3</i> | miR-648             | 2 |
| <i>circCSMD3</i> | miR-6502-3p         | 1 |
| <i>circCSMD3</i> | miR-6508-3p         | 1 |
| <i>circCSMD3</i> | miR-6513-3p         | 2 |
| <i>circCSMD3</i> | miR-6513-5p         | 1 |
| <i>circCSMD3</i> | miR-6515-3p         | 1 |
| <i>circCSMD3</i> | miR-656-5p          | 1 |
| <i>circCSMD3</i> | miR-660-5p          | 1 |
| <i>circCSMD3</i> | miR-6724-5p/6773-5p | 1 |
| <i>circCSMD3</i> | miR-6728-3p         | 2 |
| <i>circCSMD3</i> | miR-6728-5p         | 1 |
| <i>circCSMD3</i> | miR-6740-5p         | 2 |
| <i>circCSMD3</i> | miR-6749-3p         | 1 |
| <i>circCSMD3</i> | miR-6759-3p         | 1 |
| <i>circCSMD3</i> | miR-6769a-3p        | 1 |
| <i>circCSMD3</i> | miR-6773-3p         | 2 |
| <i>circCSMD3</i> | miR-6776-3p         | 2 |
| <i>circCSMD3</i> | miR-6780b-3p        | 1 |
| <i>circCSMD3</i> | miR-6800-3p         | 1 |
| <i>circCSMD3</i> | miR-6804-3p         | 1 |
| <i>circCSMD3</i> | miR-6809-3p         | 3 |
| <i>circCSMD3</i> | miR-6809-5p         | 1 |
| <i>circCSMD3</i> | miR-6813-3p         | 2 |
| <i>circCSMD3</i> | miR-6814-5p         | 1 |
| <i>circCSMD3</i> | miR-6818-5p         | 1 |
| <i>circCSMD3</i> | miR-6837-3p         | 1 |
| <i>circCSMD3</i> | miR-6843-3p/6848-3p | 1 |
| <i>circCSMD3</i> | miR-6854-3p         | 1 |

|                  |                          |   |
|------------------|--------------------------|---|
| <i>circCSMD3</i> | miR-6857-3p              | 2 |
| <i>circCSMD3</i> | miR-6866-5p              | 2 |
| <i>circCSMD3</i> | miR-6867-5p              | 1 |
| <i>circCSMD3</i> | miR-6873-5p              | 1 |
| <i>circCSMD3</i> | miR-6888-3p              | 2 |
| <i>circCSMD3</i> | miR-6894-5p              | 1 |
| <i>circCSMD3</i> | miR-6895-3p              | 1 |
| <i>circCSMD3</i> | miR-6895-5p              | 1 |
| <i>circCSMD3</i> | miR-711                  | 1 |
| <i>circCSMD3</i> | miR-7152-3p              | 1 |
| <i>circCSMD3</i> | miR-7154-3p              | 1 |
| <i>circCSMD3</i> | miR-7154-5p              | 4 |
| <i>circCSMD3</i> | miR-7159-3p              | 3 |
| <i>circCSMD3</i> | miR-7160-3p              | 1 |
| <i>circCSMD3</i> | miR-7161-3p              | 1 |
| <i>circCSMD3</i> | miR-758-3p               | 4 |
| <i>circCSMD3</i> | miR-765                  | 1 |
| <i>circCSMD3</i> | miR-766-5p               | 1 |
| <i>circCSMD3</i> | miR-7850-5p              | 3 |
| <i>circCSMD3</i> | miR-7855-5p              | 2 |
| <i>circCSMD3</i> | miR-7978                 | 2 |
| <i>circCSMD3</i> | miR-8057                 | 1 |
| <i>circCSMD3</i> | miR-8076                 | 1 |
| <i>circCSMD3</i> | miR-8081                 | 1 |
| <i>circCSMD3</i> | miR-876-3p               | 1 |
| <i>circCSMD3</i> | miR-877-5p               | 2 |
| <i>circCSMD3</i> | miR-887-5p               | 1 |
| <i>circCSMD3</i> | miR-9-5p                 | 1 |
| <i>circCSMD3</i> | miR-937-5p               | 1 |
| <i>circCSMD3</i> | miR-942-5p               | 3 |
| <i>circCSMD3</i> | miR-944                  | 1 |
| <i>circCSMD3</i> | miR-1229-3p              | 1 |
| <i>circCSMD3</i> | miR-1238-5p/4758-5p      | 1 |
| <i>circCSMD3</i> | miR-1262/4701-3p/6736-5p | 1 |
| <i>circCSMD3</i> | miR-127-5p               | 1 |
| <i>circCSMD3</i> | miR-1283                 | 1 |
| <i>circCSMD3</i> | miR-1296-3p              | 1 |
| <i>circCSMD3</i> | miR-150-5p               | 1 |

|                  |                     |   |
|------------------|---------------------|---|
| <i>circCSMD3</i> | miR-15a-3p          | 1 |
| <i>circCSMD3</i> | miR-194-3p          | 1 |
| <i>circCSMD3</i> | miR-2116-3p         | 1 |
| <i>circCSMD3</i> | miR-320e            | 1 |
| <i>circCSMD3</i> | miR-3928-5p/6806-3p | 1 |
| <i>circCSMD3</i> | miR-4432            | 1 |
| <i>circCSMD3</i> | miR-4481/4745-5p    | 2 |
| <i>circCSMD3</i> | miR-4520-3p         | 2 |
| <i>circCSMD3</i> | miR-4522            | 2 |
| <i>circCSMD3</i> | miR-4529-5p         | 1 |
| <i>circCSMD3</i> | miR-4658/6790-5p    | 1 |
| <i>circCSMD3</i> | miR-4716-5p         | 1 |
| <i>circCSMD3</i> | miR-4755-3p         | 1 |
| <i>circCSMD3</i> | miR-532-3p          | 1 |
| <i>circCSMD3</i> | miR-548u/7161-5p    | 1 |
| <i>circCSMD3</i> | miR-5693            | 1 |
| <i>circCSMD3</i> | miR-653-5p          | 1 |
| <i>circCSMD3</i> | miR-6741-5p         | 1 |
| <i>circCSMD3</i> | miR-6748-5p         | 1 |
| <i>circCSMD3</i> | miR-6753-5p         | 1 |
| <i>circCSMD3</i> | miR-6771-3p         | 2 |
| <i>circCSMD3</i> | miR-6793-5p         | 1 |
| <i>circCSMD3</i> | miR-6873-3p         | 1 |
| <i>circCSMD3</i> | miR-7106-3p         | 1 |
| <i>circCSMD3</i> | miR-7843-3p         | 1 |
| <i>circCSMD3</i> | miR-7977            | 2 |
| <i>circCSMD3</i> | miR-8087            | 1 |
| <i>circCSMD3</i> | miR-1-5p            | 1 |
| <i>circCSMD3</i> | miR-101-5p          | 1 |
| <i>circCSMD3</i> | miR-1179            | 1 |
| <i>circCSMD3</i> | miR-1204            | 1 |
| <i>circCSMD3</i> | miR-1227-5p         | 1 |
| <i>circCSMD3</i> | miR-1247-3p         | 2 |
| <i>circCSMD3</i> | miR-125-5p          | 1 |
| <i>circCSMD3</i> | miR-1292-5p         | 2 |
| <i>circCSMD3</i> | miR-1306-3p         | 1 |
| <i>circCSMD3</i> | miR-146b-3p         | 1 |
| <i>circCSMD3</i> | miR-148b-5p/6874-3p | 1 |

|                  |                                     |   |
|------------------|-------------------------------------|---|
| <i>circCSMD3</i> | miR-214-5p                          | 1 |
| <i>circCSMD3</i> | miR-216a-5p                         | 1 |
| <i>circCSMD3</i> | miR-216b-5p                         | 1 |
| <i>circCSMD3</i> | miR-217                             | 1 |
| <i>circCSMD3</i> | miR-25-3p/32-5p/92-3p/363-3p/367-3p | 1 |
| <i>circCSMD3</i> | miR-302b-5p/302d-5p                 | 1 |
| <i>circCSMD3</i> | miR-3130-3p                         | 1 |
| <i>circCSMD3</i> | miR-3138                            | 1 |
| <i>circCSMD3</i> | miR-3154                            | 2 |
| <i>circCSMD3</i> | miR-3157-3p                         | 1 |
| <i>circCSMD3</i> | miR-3168                            | 1 |
| <i>circCSMD3</i> | miR-3173-5p                         | 1 |
| <i>circCSMD3</i> | miR-3177-3p                         | 1 |
| <i>circCSMD3</i> | miR-3179                            | 1 |
| <i>circCSMD3</i> | miR-345-5p                          | 1 |
| <i>circCSMD3</i> | miR-365-3p                          | 1 |
| <i>circCSMD3</i> | miR-3667-3p                         | 1 |
| <i>circCSMD3</i> | miR-3923                            | 1 |
| <i>circCSMD3</i> | miR-3929/4419b/4478                 | 1 |
| <i>circCSMD3</i> | miR-4260                            | 1 |
| <i>circCSMD3</i> | miR-4270/4441/6754-5p               | 2 |
| <i>circCSMD3</i> | miR-4275                            | 2 |
| <i>circCSMD3</i> | miR-4282                            | 1 |
| <i>circCSMD3</i> | miR-4283                            | 1 |
| <i>circCSMD3</i> | miR-4297/5581-5p                    | 1 |
| <i>circCSMD3</i> | miR-4421/5699-3p                    | 1 |
| <i>circCSMD3</i> | miR-4426/4647/4662b                 | 1 |
| <i>circCSMD3</i> | miR-4471/8059                       | 2 |
| <i>circCSMD3</i> | miR-4477a                           | 1 |
| <i>circCSMD3</i> | miR-4489                            | 1 |
| <i>circCSMD3</i> | miR-450a-2-3p                       | 1 |
| <i>circCSMD3</i> | miR-451b                            | 1 |
| <i>circCSMD3</i> | miR-4537                            | 1 |
| <i>circCSMD3</i> | miR-4649-3p                         | 1 |
| <i>circCSMD3</i> | miR-4653-3p                         | 1 |
| <i>circCSMD3</i> | miR-4656                            | 1 |
| <i>circCSMD3</i> | miR-4663                            | 1 |
| <i>circCSMD3</i> | miR-4675/4741                       | 1 |

|                  |                                                                  |   |
|------------------|------------------------------------------------------------------|---|
| <i>circCSMD3</i> | miR-4698                                                         | 2 |
| <i>circCSMD3</i> | miR-4722-3p/6727-3p                                              | 1 |
| <i>circCSMD3</i> | miR-4732-3p                                                      | 1 |
| <i>circCSMD3</i> | miR-4733-5p                                                      | 1 |
| <i>circCSMD3</i> | miR-4739                                                         | 1 |
| <i>circCSMD3</i> | miR-4793-3p                                                      | 1 |
| <i>circCSMD3</i> | miR-4800-5p                                                      | 1 |
| <i>circCSMD3</i> | miR-4804-5p                                                      | 1 |
| <i>circCSMD3</i> | miR-488-3p                                                       | 1 |
| <i>circCSMD3</i> | miR-494-3p                                                       | 1 |
| <i>circCSMD3</i> | miR-5000-3p                                                      | 1 |
| <i>circCSMD3</i> | miR-501-3p/502-3p                                                | 1 |
| <i>circCSMD3</i> | miR-503-3p                                                       | 1 |
| <i>circCSMD3</i> | miR-5087                                                         | 1 |
| <i>circCSMD3</i> | miR-509-3-5p/509-5p/4418                                         | 1 |
| <i>circCSMD3</i> | miR-510-3p                                                       | 1 |
| <i>circCSMD3</i> | miR-513b-3p                                                      | 1 |
| <i>circCSMD3</i> | miR-548av-5p/548k/8054                                           | 1 |
| <i>circCSMD3</i> | miR-548ay-5p/548au-5p/548as-5p/548ar-5p/548aq-5p/548ap-5p/548am- | 1 |
| <i>circCSMD3</i> | miR-548az-5p/548t-5p                                             | 1 |
| <i>circCSMD3</i> | miR-548l                                                         | 1 |
| <i>circCSMD3</i> | miR-548n                                                         | 1 |
| <i>circCSMD3</i> | miR-550a-3-5p/550a-5p/1271-3p                                    | 1 |
| <i>circCSMD3</i> | miR-5572                                                         | 1 |
| <i>circCSMD3</i> | miR-5584-3p                                                      | 1 |
| <i>circCSMD3</i> | miR-5584-5p                                                      | 1 |
| <i>circCSMD3</i> | miR-5692a                                                        | 1 |
| <i>circCSMD3</i> | miR-6090                                                         | 1 |
| <i>circCSMD3</i> | miR-6134                                                         | 1 |
| <i>circCSMD3</i> | miR-642b-5p                                                      | 1 |
| <i>circCSMD3</i> | miR-6504-3p                                                      | 2 |
| <i>circCSMD3</i> | miR-651-5p                                                       | 1 |
| <i>circCSMD3</i> | miR-6514-3p                                                      | 1 |
| <i>circCSMD3</i> | miR-670-5p                                                       | 1 |
| <i>circCSMD3</i> | miR-6734-3p                                                      | 1 |
| <i>circCSMD3</i> | miR-6747-3p                                                      | 1 |
| <i>circCSMD3</i> | miR-6748-3p                                                      | 1 |
| <i>circCSMD3</i> | miR-6750-5p/6822-5p                                              | 1 |



|                  |                              |   |
|------------------|------------------------------|---|
| <i>circCSMD3</i> | miR-6752-3p                  | 1 |
| <i>circCSMD3</i> | miR-6755-5p                  | 1 |
| <i>circCSMD3</i> | miR-6760-5p                  | 1 |
| <i>circCSMD3</i> | miR-6777-3p                  | 1 |
| <i>circCSMD3</i> | miR-6782-3p                  | 1 |
| <i>circCSMD3</i> | miR-6793-3p                  | 1 |
| <i>circCSMD3</i> | miR-6811-3p                  | 1 |
| <i>circCSMD3</i> | miR-6827-5p                  | 1 |
| <i>circCSMD3</i> | miR-6829-5p                  | 1 |
| <i>circCSMD3</i> | miR-6841-5p                  | 1 |
| <i>circCSMD3</i> | miR-6845-3p                  | 1 |
| <i>circCSMD3</i> | miR-6894-3p                  | 1 |
| <i>circCSMD3</i> | miR-7160-5p                  | 1 |
| <i>circCSMD3</i> | miR-7162-3p                  | 1 |
| <i>circCSMD3</i> | miR-7515                     | 1 |
| <i>circCSMD3</i> | miR-762/4492/4498/5001-5p    | 1 |
| <i>circCSMD3</i> | miR-7849-3p                  | 1 |
| <i>circCSMD3</i> | miR-7854-3p                  | 1 |
| <i>circCSMD3</i> | miR-7976                     | 1 |
| <i>circCSMD3</i> | miR-8063                     | 2 |
| <i>circCSMD3</i> | miR-8069                     | 1 |
| <i>circCSMD3</i> | miR-8077                     | 1 |
| <i>circCSMD3</i> | miR-874-3p                   | 1 |
| <i>circCSMD3</i> | miR-888-5p                   | 1 |
| <i>circCSMD3</i> | miR-920/4300/5591-5p/6726-5p | 1 |
| <i>circCSMD3</i> | miR-942-3p                   | 1 |
| <i>circCSMD3</i> | miR-9500                     | 1 |
| <i>circCSMD3</i> | miR-595                      | 1 |
| <i>circCSMD3</i> | miR-1184                     | 1 |
| <i>circCSMD3</i> | miR-1185-5p                  | 1 |
| <i>circCSMD3</i> | miR-1205                     | 1 |
| <i>circCSMD3</i> | miR-1207-3p                  | 1 |
| <i>circCSMD3</i> | miR-1226-5p                  | 1 |
| <i>circCSMD3</i> | miR-1228-3p                  | 1 |
| <i>circCSMD3</i> | miR-1245b-3p                 | 1 |
| <i>circCSMD3</i> | miR-1245b-5p                 | 1 |
| <i>circCSMD3</i> | miR-1253                     | 1 |
| <i>circCSMD3</i> | miR-127-3p                   | 1 |

|                  |                                    |   |
|------------------|------------------------------------|---|
| <i>circCSMD3</i> | miR-1276                           | 2 |
| <i>circCSMD3</i> | miR-129-5p                         | 1 |
| <i>circCSMD3</i> | miR-139-5p                         | 1 |
| <i>circCSMD3</i> | miR-149-3p/4728-5p/6785-5p/6883-5p | 1 |
| <i>circCSMD3</i> | miR-151-3p                         | 1 |
| <i>circCSMD3</i> | miR-151-5p                         | 1 |
| <i>circCSMD3</i> | miR-155-3p                         | 1 |
| <i>circCSMD3</i> | miR-17-3p                          | 1 |
| <i>circCSMD3</i> | miR-19-3p                          | 1 |
| <i>circCSMD3</i> | miR-191-5p                         | 1 |
| <i>circCSMD3</i> | miR-1972                           | 1 |
| <i>circCSMD3</i> | miR-2115-5p                        | 1 |
| <i>circCSMD3</i> | miR-2117                           | 1 |
| <i>circCSMD3</i> | miR-214-3p/3619-5p                 | 1 |
| <i>circCSMD3</i> | miR-2278                           | 1 |
| <i>circCSMD3</i> | miR-26b-3p                         | 1 |
| <i>circCSMD3</i> | miR-27b-5p                         | 1 |
| <i>circCSMD3</i> | miR-28-5p/708-5p                   | 1 |
| <i>circCSMD3</i> | miR-3126-5p                        | 1 |
| <i>circCSMD3</i> | miR-3129-3p/5583-5p                | 1 |
| <i>circCSMD3</i> | miR-3141                           | 1 |
| <i>circCSMD3</i> | miR-3153/6733-5p/6739-5p           | 1 |
| <i>circCSMD3</i> | miR-3158-5p                        | 1 |
| <i>circCSMD3</i> | miR-3169                           | 1 |
| <i>circCSMD3</i> | miR-3178                           | 1 |
| <i>circCSMD3</i> | miR-3180-5p                        | 1 |
| <i>circCSMD3</i> | miR-338-3p                         | 1 |
| <i>circCSMD3</i> | miR-3605-5p                        | 1 |
| <i>circCSMD3</i> | miR-3606-5p                        | 1 |
| <i>circCSMD3</i> | miR-3713                           | 1 |
| <i>circCSMD3</i> | miR-376a-2-5p                      | 1 |
| <i>circCSMD3</i> | miR-376a-5p                        | 1 |
| <i>circCSMD3</i> | miR-383-5p.1                       | 1 |
| <i>circCSMD3</i> | miR-3907                           | 1 |
| <i>circCSMD3</i> | miR-3941                           | 1 |
| <i>circCSMD3</i> | miR-4311                           | 2 |
| <i>circCSMD3</i> | miR-4330                           | 1 |
| <i>circCSMD3</i> | miR-4419a/4510/6127/6129/6130/6133 | 1 |

|                  |                             |   |
|------------------|-----------------------------|---|
| <i>circCSMD3</i> | miR-4433a-3p                | 2 |
| <i>circCSMD3</i> | miR-4438                    | 1 |
| <i>circCSMD3</i> | miR-4459                    | 2 |
| <i>circCSMD3</i> | miR-4484                    | 1 |
| <i>circCSMD3</i> | miR-4509                    | 1 |
| <i>circCSMD3</i> | miR-4511                    | 1 |
| <i>circCSMD3</i> | miR-4527/6503-5p            | 1 |
| <i>circCSMD3</i> | miR-4530                    | 1 |
| <i>circCSMD3</i> | miR-4633-5p                 | 1 |
| <i>circCSMD3</i> | miR-4650-5p                 | 1 |
| <i>circCSMD3</i> | miR-4668-5p                 | 1 |
| <i>circCSMD3</i> | miR-4672                    | 1 |
| <i>circCSMD3</i> | miR-4678                    | 1 |
| <i>circCSMD3</i> | miR-4704-5p                 | 1 |
| <i>circCSMD3</i> | miR-4710                    | 1 |
| <i>circCSMD3</i> | miR-4717-5p                 | 1 |
| <i>circCSMD3</i> | miR-4719                    | 1 |
| <i>circCSMD3</i> | miR-4731-3p/4801            | 1 |
| <i>circCSMD3</i> | miR-4744                    | 1 |
| <i>circCSMD3</i> | miR-4747-5p/5196-5p         | 1 |
| <i>circCSMD3</i> | miR-4753-5p                 | 1 |
| <i>circCSMD3</i> | miR-4759                    | 1 |
| <i>circCSMD3</i> | miR-4768-3p                 | 2 |
| <i>circCSMD3</i> | miR-4772-5p                 | 1 |
| <i>circCSMD3</i> | miR-4777-3p                 | 1 |
| <i>circCSMD3</i> | miR-4792                    | 1 |
| <i>circCSMD3</i> | miR-488-5p                  | 1 |
| <i>circCSMD3</i> | miR-491-3p                  | 1 |
| <i>circCSMD3</i> | miR-496.2                   | 1 |
| <i>circCSMD3</i> | miR-4999-3p                 | 1 |
| <i>circCSMD3</i> | miR-5008-3p/6737-3p/7157-3p | 1 |
| <i>circCSMD3</i> | miR-516a-3p/516b-3p/7162-5p | 1 |
| <i>circCSMD3</i> | miR-5188                    | 1 |
| <i>circCSMD3</i> | miR-5197-3p                 | 1 |
| <i>circCSMD3</i> | miR-520g-5p                 | 1 |
| <i>circCSMD3</i> | miR-548an                   | 1 |
| <i>circCSMD3</i> | miR-548b-3p                 | 1 |
| <i>circCSMD3</i> | miR-5680                    | 1 |

|                  |                       |   |
|------------------|-----------------------|---|
| <i>circCSMD3</i> | miR-5681b             | 1 |
| <i>circCSMD3</i> | miR-5683              | 1 |
| <i>circCSMD3</i> | miR-573/3616-5p       | 1 |
| <i>circCSMD3</i> | miR-583               | 2 |
| <i>circCSMD3</i> | miR-6081              | 1 |
| <i>circCSMD3</i> | miR-611/3131          | 1 |
| <i>circCSMD3</i> | miR-621               | 1 |
| <i>circCSMD3</i> | miR-624-5p            | 1 |
| <i>circCSMD3</i> | miR-626/6876-3p       | 1 |
| <i>circCSMD3</i> | miR-628-5p            | 1 |
| <i>circCSMD3</i> | miR-6720-5p           | 1 |
| <i>circCSMD3</i> | miR-6722-5p           | 1 |
| <i>circCSMD3</i> | miR-6734-5p           | 1 |
| <i>circCSMD3</i> | miR-6735-3p           | 1 |
| <i>circCSMD3</i> | miR-6753-3p/7107-3p   | 1 |
| <i>circCSMD3</i> | miR-676-3p            | 1 |
| <i>circCSMD3</i> | miR-6768-3p           | 1 |
| <i>circCSMD3</i> | miR-6770-5p           | 1 |
| <i>circCSMD3</i> | miR-6799-5p           | 1 |
| <i>circCSMD3</i> | miR-6816-3p           | 1 |
| <i>circCSMD3</i> | miR-6817-3p           | 1 |
| <i>circCSMD3</i> | miR-6834-3p           | 1 |
| <i>circCSMD3</i> | miR-6834-5p           | 1 |
| <i>circCSMD3</i> | miR-6846-3p           | 1 |
| <i>circCSMD3</i> | miR-6859-3p           | 1 |
| <i>circCSMD3</i> | miR-6882-5p           | 1 |
| <i>circCSMD3</i> | miR-6889-3p           | 1 |
| <i>circCSMD3</i> | miR-7-3p              | 1 |
| <i>circCSMD3</i> | miR-7106-5p           | 1 |
| <i>circCSMD3</i> | miR-7110-3p           | 1 |
| <i>circCSMD3</i> | miR-8064              | 1 |
| <i>circCSMD3</i> | miR-8080              | 1 |
| <i>circCSMD3</i> | miR-8083              | 1 |
| <i>circCSMD3</i> | miR-875-5p            | 1 |
| <i>circCSMD3</i> | miR-921               | 1 |
| <i>circCSMD3</i> | miR-922               | 1 |
| <i>circCSMD3</i> | miR-95-3p             | 1 |
| <i>circCUL5</i>  | let-7a-2-3p/let-7g-3p | 1 |

|                 |                     |   |
|-----------------|---------------------|---|
| <i>circCUL5</i> | let-7c-3p           | 1 |
| <i>circCUL5</i> | miR-103a-2-5p       | 2 |
| <i>circCUL5</i> | miR-106a-3p         | 2 |
| <i>circCUL5</i> | miR-1207-3p         | 2 |
| <i>circCUL5</i> | miR-122-3p          | 1 |
| <i>circCUL5</i> | miR-1237-3p         | 2 |
| <i>circCUL5</i> | miR-1244            | 2 |
| <i>circCUL5</i> | miR-1248            | 2 |
| <i>circCUL5</i> | miR-1250-3p         | 1 |
| <i>circCUL5</i> | miR-1251-5p         | 1 |
| <i>circCUL5</i> | miR-1264            | 2 |
| <i>circCUL5</i> | miR-1266-3p         | 1 |
| <i>circCUL5</i> | miR-1266-5p/4518    | 1 |
| <i>circCUL5</i> | miR-1267            | 1 |
| <i>circCUL5</i> | miR-1273e           | 3 |
| <i>circCUL5</i> | miR-1277-3p         | 1 |
| <i>circCUL5</i> | miR-1277-5p         | 1 |
| <i>circCUL5</i> | miR-1278            | 1 |
| <i>circCUL5</i> | miR-1279            | 1 |
| <i>circCUL5</i> | miR-1284            | 1 |
| <i>circCUL5</i> | miR-1289            | 2 |
| <i>circCUL5</i> | miR-129-5p          | 2 |
| <i>circCUL5</i> | miR-1298-5p         | 2 |
| <i>circCUL5</i> | miR-1305            | 2 |
| <i>circCUL5</i> | miR-135-5p          | 1 |
| <i>circCUL5</i> | miR-137             | 1 |
| <i>circCUL5</i> | miR-141-5p          | 1 |
| <i>circCUL5</i> | miR-142-3p.1        | 1 |
| <i>circCUL5</i> | miR-146b-3p         | 1 |
| <i>circCUL5</i> | miR-148a-5p         | 1 |
| <i>circCUL5</i> | miR-148b-5p/6874-3p | 1 |
| <i>circCUL5</i> | miR-150-5p          | 1 |
| <i>circCUL5</i> | miR-153-3p          | 1 |
| <i>circCUL5</i> | miR-154-5p          | 1 |
| <i>circCUL5</i> | miR-15b-3p          | 2 |
| <i>circCUL5</i> | miR-16-2-3p/195-3p  | 2 |
| <i>circCUL5</i> | miR-181-5p          | 1 |
| <i>circCUL5</i> | miR-183-3p          | 2 |

|                 |                                     |   |
|-----------------|-------------------------------------|---|
| <i>circCUL5</i> | miR-186-5p                          | 1 |
| <i>circCUL5</i> | miR-18a-3p                          | 1 |
| <i>circCUL5</i> | miR-19-5p                           | 1 |
| <i>circCUL5</i> | miR-191-5p                          | 1 |
| <i>circCUL5</i> | miR-1914-5p                         | 2 |
| <i>circCUL5</i> | miR-200-3p/429                      | 1 |
| <i>circCUL5</i> | miR-205-3p                          | 1 |
| <i>circCUL5</i> | miR-2052                            | 1 |
| <i>circCUL5</i> | miR-208-5p                          | 1 |
| <i>circCUL5</i> | miR-20a-3p                          | 2 |
| <i>circCUL5</i> | miR-2116-3p                         | 1 |
| <i>circCUL5</i> | miR-214-5p                          | 2 |
| <i>circCUL5</i> | miR-216a-5p                         | 3 |
| <i>circCUL5</i> | miR-216b-5p                         | 3 |
| <i>circCUL5</i> | miR-217                             | 1 |
| <i>circCUL5</i> | miR-218-5p                          | 2 |
| <i>circCUL5</i> | miR-222-5p                          | 2 |
| <i>circCUL5</i> | miR-224-5p                          | 1 |
| <i>circCUL5</i> | miR-23-3p                           | 1 |
| <i>circCUL5</i> | miR-2355-3p                         | 2 |
| <i>circCUL5</i> | miR-24-3p                           | 1 |
| <i>circCUL5</i> | miR-25-3p/32-5p/92-3p/363-3p/367-3p | 1 |
| <i>circCUL5</i> | miR-2861                            | 2 |
| <i>circCUL5</i> | miR-29a-5p                          | 3 |
| <i>circCUL5</i> | miR-29b-1-5p                        | 1 |
| <i>circCUL5</i> | miR-302c-3p.2/520-3p                | 2 |
| <i>circCUL5</i> | miR-302c-5p                         | 2 |
| <i>circCUL5</i> | miR-3065-5p                         | 1 |
| <i>circCUL5</i> | miR-3074-3p                         | 1 |
| <i>circCUL5</i> | miR-3120-5p                         | 1 |
| <i>circCUL5</i> | miR-3133                            | 1 |
| <i>circCUL5</i> | miR-3140-3p                         | 1 |
| <i>circCUL5</i> | miR-3143                            | 2 |
| <i>circCUL5</i> | miR-3145-3p                         | 1 |
| <i>circCUL5</i> | miR-3145-5p                         | 1 |
| <i>circCUL5</i> | miR-3157-3p                         | 1 |
| <i>circCUL5</i> | miR-3159                            | 2 |
| <i>circCUL5</i> | miR-3160-5p                         | 1 |

|                 |                           |   |
|-----------------|---------------------------|---|
| <i>circCUL5</i> | miR-3163                  | 2 |
| <i>circCUL5</i> | miR-3168                  | 1 |
| <i>circCUL5</i> | miR-3173-5p               | 1 |
| <i>circCUL5</i> | miR-3184-3p               | 2 |
| <i>circCUL5</i> | miR-3191-5p               | 1 |
| <i>circCUL5</i> | miR-3198/4309             | 1 |
| <i>circCUL5</i> | miR-320                   | 3 |
| <i>circCUL5</i> | miR-3200-5p               | 1 |
| <i>circCUL5</i> | miR-323b-3p               | 1 |
| <i>circCUL5</i> | miR-324-3p/1913           | 1 |
| <i>circCUL5</i> | miR-330-3p                | 1 |
| <i>circCUL5</i> | miR-338-5p                | 2 |
| <i>circCUL5</i> | miR-339-5p                | 1 |
| <i>circCUL5</i> | miR-340-5p                | 2 |
| <i>circCUL5</i> | miR-3607-3p               | 2 |
| <i>circCUL5</i> | miR-3613-3p               | 1 |
| <i>circCUL5</i> | miR-3613-5p               | 1 |
| <i>circCUL5</i> | miR-3664-3p               | 1 |
| <i>circCUL5</i> | miR-3668                  | 1 |
| <i>circCUL5</i> | miR-367-5p                | 1 |
| <i>circCUL5</i> | miR-3675-3p               | 4 |
| <i>circCUL5</i> | miR-3682-5p               | 1 |
| <i>circCUL5</i> | miR-3686                  | 2 |
| <i>circCUL5</i> | miR-369-3p                | 1 |
| <i>circCUL5</i> | miR-3691-3p               | 2 |
| <i>circCUL5</i> | miR-3692-3p               | 1 |
| <i>circCUL5</i> | miR-371-5p                | 1 |
| <i>circCUL5</i> | miR-371b-5p/373-5p/616-5p | 1 |
| <i>circCUL5</i> | miR-372-5p                | 1 |
| <i>circCUL5</i> | miR-374-5p                | 1 |
| <i>circCUL5</i> | miR-374a-3p               | 3 |
| <i>circCUL5</i> | miR-374b-3p               | 2 |
| <i>circCUL5</i> | miR-375                   | 1 |
| <i>circCUL5</i> | miR-376c-3p               | 1 |
| <i>circCUL5</i> | miR-378g                  | 2 |
| <i>circCUL5</i> | miR-380-3p                | 1 |
| <i>circCUL5</i> | miR-3907                  | 1 |
| <i>circCUL5</i> | miR-3934-3p               | 1 |

|                 |                  |   |
|-----------------|------------------|---|
| <i>circCUL5</i> | miR-3977         | 3 |
| <i>circCUL5</i> | miR-410-3p       | 1 |
| <i>circCUL5</i> | miR-421          | 2 |
| <i>circCUL5</i> | miR-4251         | 1 |
| <i>circCUL5</i> | miR-4263         | 1 |
| <i>circCUL5</i> | miR-4264         | 1 |
| <i>circCUL5</i> | miR-4267         | 2 |
| <i>circCUL5</i> | miR-4272         | 2 |
| <i>circCUL5</i> | miR-4273/7156-5p | 1 |
| <i>circCUL5</i> | miR-4282         | 1 |
| <i>circCUL5</i> | miR-4284         | 1 |
| <i>circCUL5</i> | miR-4289         | 1 |
| <i>circCUL5</i> | miR-4291         | 2 |
| <i>circCUL5</i> | miR-4293         | 2 |
| <i>circCUL5</i> | miR-4294         | 2 |
| <i>circCUL5</i> | miR-4297/5581-5p | 1 |
| <i>circCUL5</i> | miR-4303         | 1 |
| <i>circCUL5</i> | miR-4307         | 1 |
| <i>circCUL5</i> | miR-431-5p       | 1 |
| <i>circCUL5</i> | miR-4310/7157-5p | 2 |
| <i>circCUL5</i> | miR-4317         | 1 |
| <i>circCUL5</i> | miR-432-5p       | 1 |
| <i>circCUL5</i> | miR-4320         | 1 |
| <i>circCUL5</i> | miR-4325         | 1 |
| <i>circCUL5</i> | miR-4327         | 2 |
| <i>circCUL5</i> | miR-4329         | 1 |
| <i>circCUL5</i> | miR-4424         | 1 |
| <i>circCUL5</i> | miR-4433b-5p     | 1 |
| <i>circCUL5</i> | miR-4452         | 2 |
| <i>circCUL5</i> | miR-4463         | 1 |
| <i>circCUL5</i> | miR-4464/4748    | 2 |
| <i>circCUL5</i> | miR-4473         | 1 |
| <i>circCUL5</i> | miR-448          | 1 |
| <i>circCUL5</i> | miR-4482-3p      | 1 |
| <i>circCUL5</i> | miR-4486         | 2 |
| <i>circCUL5</i> | miR-4494         | 1 |
| <i>circCUL5</i> | miR-4499         | 1 |
| <i>circCUL5</i> | miR-4502         | 2 |



|                 |                       |   |
|-----------------|-----------------------|---|
| <i>circCUL5</i> | miR-4511              | 1 |
| <i>circCUL5</i> | miR-4517              | 2 |
| <i>circCUL5</i> | miR-452-3p            | 2 |
| <i>circCUL5</i> | miR-4524b-3p          | 2 |
| <i>circCUL5</i> | miR-4633-5p           | 1 |
| <i>circCUL5</i> | miR-4636              | 1 |
| <i>circCUL5</i> | miR-4646-3p           | 2 |
| <i>circCUL5</i> | miR-4652-3p           | 2 |
| <i>circCUL5</i> | miR-4653-3p           | 1 |
| <i>circCUL5</i> | miR-4659a-3p/4659b-3p | 2 |
| <i>circCUL5</i> | miR-4663              | 1 |
| <i>circCUL5</i> | miR-4666b             | 1 |
| <i>circCUL5</i> | miR-4668-3p           | 1 |
| <i>circCUL5</i> | miR-4670-3p           | 2 |
| <i>circCUL5</i> | miR-4671-3p           | 1 |
| <i>circCUL5</i> | miR-4677-5p           | 1 |
| <i>circCUL5</i> | miR-4682              | 1 |
| <i>circCUL5</i> | miR-4684-5p           | 1 |
| <i>circCUL5</i> | miR-4686              | 2 |
| <i>circCUL5</i> | miR-4693-5p           | 1 |
| <i>circCUL5</i> | miR-4698              | 2 |
| <i>circCUL5</i> | miR-4703-3p           | 1 |
| <i>circCUL5</i> | miR-4713-5p           | 1 |
| <i>circCUL5</i> | miR-4716-5p           | 1 |
| <i>circCUL5</i> | miR-4720-3p           | 2 |
| <i>circCUL5</i> | miR-4731-5p           | 3 |
| <i>circCUL5</i> | miR-4733-5p           | 2 |
| <i>circCUL5</i> | miR-4743-3p           | 2 |
| <i>circCUL5</i> | miR-4753-3p           | 4 |
| <i>circCUL5</i> | miR-4766-3p           | 1 |
| <i>circCUL5</i> | miR-4768-5p/6833-3p   | 3 |
| <i>circCUL5</i> | miR-4773              | 1 |
| <i>circCUL5</i> | miR-4775              | 2 |
| <i>circCUL5</i> | miR-4778-3p           | 5 |
| <i>circCUL5</i> | miR-4778-5p           | 1 |
| <i>circCUL5</i> | miR-4795-3p           | 2 |
| <i>circCUL5</i> | miR-4797-3p           | 1 |
| <i>circCUL5</i> | miR-4799-5p           | 2 |

|                 |                                                                  |   |
|-----------------|------------------------------------------------------------------|---|
| <i>circCUL5</i> | miR-4803                                                         | 2 |
| <i>circCUL5</i> | miR-4804-3p                                                      | 2 |
| <i>circCUL5</i> | miR-493-5p                                                       | 1 |
| <i>circCUL5</i> | miR-495-3p                                                       | 1 |
| <i>circCUL5</i> | miR-498                                                          | 2 |
| <i>circCUL5</i> | miR-499b-5p                                                      | 1 |
| <i>circCUL5</i> | miR-5002-3p                                                      | 1 |
| <i>circCUL5</i> | miR-5007-3p                                                      | 1 |
| <i>circCUL5</i> | miR-5008-3p/6737-3p/7157-3p                                      | 2 |
| <i>circCUL5</i> | miR-501-3p/502-3p                                                | 1 |
| <i>circCUL5</i> | miR-5011-3p                                                      | 1 |
| <i>circCUL5</i> | miR-5011-5p                                                      | 1 |
| <i>circCUL5</i> | miR-505-3p.2                                                     | 2 |
| <i>circCUL5</i> | miR-508-5p                                                       | 1 |
| <i>circCUL5</i> | miR-509-3-5p/509-5p/4418                                         | 1 |
| <i>circCUL5</i> | miR-510-3p                                                       | 3 |
| <i>circCUL5</i> | miR-511-3p                                                       | 1 |
| <i>circCUL5</i> | miR-511-5p                                                       | 1 |
| <i>circCUL5</i> | miR-512-3p                                                       | 2 |
| <i>circCUL5</i> | miR-513a-3p/513c-3p/3606-3p                                      | 1 |
| <i>circCUL5</i> | miR-513c-5p/514b-5p                                              | 1 |
| <i>circCUL5</i> | miR-514a-3p                                                      | 1 |
| <i>circCUL5</i> | miR-517-3p                                                       | 1 |
| <i>circCUL5</i> | miR-517-5p                                                       | 1 |
| <i>circCUL5</i> | miR-519d-5p                                                      | 2 |
| <i>circCUL5</i> | miR-526b-5p                                                      | 3 |
| <i>circCUL5</i> | miR-532-3p                                                       | 1 |
| <i>circCUL5</i> | miR-532-5p                                                       | 2 |
| <i>circCUL5</i> | miR-545-3p                                                       | 2 |
| <i>circCUL5</i> | miR-548av-5p/548k/8054                                           | 1 |
| <i>circCUL5</i> | miR-548ay-5p/548au-5p/548as-5p/548ar-5p/548aq-5p/548ap-5p/548am- | 1 |
| <i>circCUL5</i> | miR-548az-5p/548t-5p                                             | 1 |
| <i>circCUL5</i> | miR-548b-3p                                                      | 1 |
| <i>circCUL5</i> | miR-548e-5p                                                      | 2 |
| <i>circCUL5</i> | miR-548g-3p                                                      | 1 |
| <i>circCUL5</i> | miR-548l                                                         | 1 |
| <i>circCUL5</i> | miR-548m                                                         | 3 |
| <i>circCUL5</i> | miR-548n                                                         | 1 |

|                 |                                      |   |
|-----------------|--------------------------------------|---|
| <i>circCUL5</i> | miR-548p                             | 1 |
| <i>circCUL5</i> | miR-548u/7161-5p                     | 2 |
| <i>circCUL5</i> | miR-550a-3-5p/550a-5p/1271-3p        | 1 |
| <i>circCUL5</i> | miR-550b-3p                          | 2 |
| <i>circCUL5</i> | miR-5571-5p                          | 1 |
| <i>circCUL5</i> | miR-5581-3p                          | 2 |
| <i>circCUL5</i> | miR-5583-3p                          | 2 |
| <i>circCUL5</i> | miR-5584-3p                          | 1 |
| <i>circCUL5</i> | miR-5589-3p                          | 1 |
| <i>circCUL5</i> | miR-5589-5p                          | 3 |
| <i>circCUL5</i> | miR-5591-3p                          | 1 |
| <i>circCUL5</i> | miR-5687                             | 2 |
| <i>circCUL5</i> | miR-5692a                            | 3 |
| <i>circCUL5</i> | miR-5692bc                           | 1 |
| <i>circCUL5</i> | miR-5695                             | 2 |
| <i>circCUL5</i> | miR-5697                             | 1 |
| <i>circCUL5</i> | miR-5700                             | 1 |
| <i>circCUL5</i> | miR-573/3616-5p                      | 1 |
| <i>circCUL5</i> | miR-576-5p                           | 1 |
| <i>circCUL5</i> | miR-580-3p                           | 1 |
| <i>circCUL5</i> | miR-581                              | 1 |
| <i>circCUL5</i> | miR-587                              | 2 |
| <i>circCUL5</i> | miR-590-3p                           | 3 |
| <i>circCUL5</i> | miR-592                              | 2 |
| <i>circCUL5</i> | miR-596                              | 2 |
| <i>circCUL5</i> | miR-597-5p                           | 1 |
| <i>circCUL5</i> | miR-599                              | 2 |
| <i>circCUL5</i> | miR-600                              | 1 |
| <i>circCUL5</i> | miR-607                              | 2 |
| <i>circCUL5</i> | miR-6071                             | 2 |
| <i>circCUL5</i> | miR-6073                             | 1 |
| <i>circCUL5</i> | miR-6082                             | 1 |
| <i>circCUL5</i> | miR-612/1285-3p/3187-5p/5189-5p/6860 | 2 |
| <i>circCUL5</i> | miR-629-3p                           | 1 |
| <i>circCUL5</i> | miR-634                              | 2 |
| <i>circCUL5</i> | miR-636                              | 4 |
| <i>circCUL5</i> | miR-641/3617-5p                      | 2 |
| <i>circCUL5</i> | miR-6506-3p                          | 1 |

|                 |                     |   |
|-----------------|---------------------|---|
| <i>circCUL5</i> | miR-6507-3p         | 2 |
| <i>circCUL5</i> | miR-6507-5p         | 2 |
| <i>circCUL5</i> | miR-6512-5p         | 2 |
| <i>circCUL5</i> | miR-6514-3p         | 2 |
| <i>circCUL5</i> | miR-656-3p          | 1 |
| <i>circCUL5</i> | miR-660-5p          | 1 |
| <i>circCUL5</i> | miR-6724-5p/6773-5p | 2 |
| <i>circCUL5</i> | miR-6729-3p         | 3 |
| <i>circCUL5</i> | miR-6740-3p         | 1 |
| <i>circCUL5</i> | miR-6750-3p         | 2 |
| <i>circCUL5</i> | miR-6758-3p         | 1 |
| <i>circCUL5</i> | miR-6761-5p         | 1 |
| <i>circCUL5</i> | miR-6787-3p         | 2 |
| <i>circCUL5</i> | miR-6788-3p         | 1 |
| <i>circCUL5</i> | miR-6792-5p         | 1 |
| <i>circCUL5</i> | miR-6804-5p         | 1 |
| <i>circCUL5</i> | miR-6809-3p         | 3 |
| <i>circCUL5</i> | miR-6811-3p         | 2 |
| <i>circCUL5</i> | miR-6817-3p         | 1 |
| <i>circCUL5</i> | miR-6828-3p         | 2 |
| <i>circCUL5</i> | miR-6867-3p         | 1 |
| <i>circCUL5</i> | miR-6869-5p         | 1 |
| <i>circCUL5</i> | miR-6873-3p         | 2 |
| <i>circCUL5</i> | miR-6875-3p         | 2 |
| <i>circCUL5</i> | miR-6882-3p         | 1 |
| <i>circCUL5</i> | miR-6882-5p         | 1 |
| <i>circCUL5</i> | miR-6883-3p         | 1 |
| <i>circCUL5</i> | miR-6885-3p         | 2 |
| <i>circCUL5</i> | miR-6889-3p         | 2 |
| <i>circCUL5</i> | miR-6894-3p         | 2 |
| <i>circCUL5</i> | miR-7-3p            | 2 |
| <i>circCUL5</i> | miR-7109-3p         | 2 |
| <i>circCUL5</i> | miR-7110-3p         | 1 |
| <i>circCUL5</i> | miR-7159-3p         | 1 |
| <i>circCUL5</i> | miR-7159-5p         | 2 |
| <i>circCUL5</i> | miR-7160-5p         | 1 |
| <i>circCUL5</i> | miR-764             | 1 |
| <i>circCUL5</i> | miR-7703            | 1 |

|                 |                     |   |
|-----------------|---------------------|---|
| <i>circCUL5</i> | miR-7852-3p         | 1 |
| <i>circCUL5</i> | miR-7976            | 1 |
| <i>circCUL5</i> | miR-8057            | 2 |
| <i>circCUL5</i> | miR-8063            | 2 |
| <i>circCUL5</i> | miR-8066            | 1 |
| <i>circCUL5</i> | miR-8077            | 1 |
| <i>circCUL5</i> | miR-8084            | 1 |
| <i>circCUL5</i> | miR-874-3p          | 1 |
| <i>circCUL5</i> | miR-885-5p          | 2 |
| <i>circCUL5</i> | miR-888-5p          | 2 |
| <i>circCUL5</i> | miR-889-5p          | 1 |
| <i>circCUL5</i> | miR-9-3p            | 2 |
| <i>circCUL5</i> | miR-924             | 1 |
| <i>circCUL5</i> | miR-942-5p          | 3 |
| <i>circCUL5</i> | miR-95-3p           | 2 |
| <i>circCUL5</i> | miR-95-5p           | 1 |
| <i>circCUL5</i> | let-7d-3p           | 1 |
| <i>circCUL5</i> | let-7e-3p           | 1 |
| <i>circCUL5</i> | miR-101-3p.1        | 1 |
| <i>circCUL5</i> | miR-105-5p          | 1 |
| <i>circCUL5</i> | miR-1178-3p         | 1 |
| <i>circCUL5</i> | miR-1179            | 1 |
| <i>circCUL5</i> | miR-1185-5p         | 2 |
| <i>circCUL5</i> | miR-1197            | 2 |
| <i>circCUL5</i> | miR-1202/3972       | 1 |
| <i>circCUL5</i> | miR-1207-5p/4763-3p | 1 |
| <i>circCUL5</i> | miR-1224-5p         | 1 |
| <i>circCUL5</i> | miR-1225-5p         | 1 |
| <i>circCUL5</i> | miR-1226-3p         | 1 |
| <i>circCUL5</i> | miR-1229-5p         | 1 |
| <i>circCUL5</i> | miR-1238-3p         | 1 |
| <i>circCUL5</i> | miR-1238-5p/4758-5p | 1 |
| <i>circCUL5</i> | miR-1249-5p/6797-5p | 1 |
| <i>circCUL5</i> | miR-1252-3p         | 1 |
| <i>circCUL5</i> | miR-1252-5p         | 1 |
| <i>circCUL5</i> | miR-1256            | 1 |
| <i>circCUL5</i> | miR-1265            | 2 |
| <i>circCUL5</i> | miR-1272            | 1 |

|                 |                                      |   |
|-----------------|--------------------------------------|---|
| <i>circCUL5</i> | miR-1286                             | 1 |
| <i>circCUL5</i> | miR-1294                             | 1 |
| <i>circCUL5</i> | miR-1301-5p/6502-5p                  | 1 |
| <i>circCUL5</i> | miR-130b-5p                          | 1 |
| <i>circCUL5</i> | miR-1322                             | 1 |
| <i>circCUL5</i> | miR-133a-5p                          | 1 |
| <i>circCUL5</i> | miR-138-5p                           | 1 |
| <i>circCUL5</i> | miR-142-3p.2                         | 1 |
| <i>circCUL5</i> | miR-143-5p                           | 1 |
| <i>circCUL5</i> | miR-144-3p                           | 1 |
| <i>circCUL5</i> | miR-149-3p/4728-5p/6785-5p/6883-5p   | 1 |
| <i>circCUL5</i> | miR-15-5p/16-5p/195-5p/424-5p/497-5p | 1 |
| <i>circCUL5</i> | miR-153-5p                           | 1 |
| <i>circCUL5</i> | miR-16-1-3p                          | 1 |
| <i>circCUL5</i> | miR-182-5p                           | 1 |
| <i>circCUL5</i> | miR-1827                             | 1 |
| <i>circCUL5</i> | miR-183-5p.2                         | 1 |
| <i>circCUL5</i> | miR-184                              | 1 |
| <i>circCUL5</i> | miR-185-3p                           | 1 |
| <i>circCUL5</i> | miR-190-5p                           | 1 |
| <i>circCUL5</i> | miR-1909-5p                          | 1 |
| <i>circCUL5</i> | miR-1910-3p/6511a-5p                 | 1 |
| <i>circCUL5</i> | miR-1911-3p                          | 1 |
| <i>circCUL5</i> | miR-197-3p                           | 1 |
| <i>circCUL5</i> | miR-1972                             | 1 |
| <i>circCUL5</i> | miR-199-3p                           | 1 |
| <i>circCUL5</i> | miR-204-3p/4646-5p                   | 1 |
| <i>circCUL5</i> | miR-2054                             | 1 |
| <i>circCUL5</i> | miR-2114-5p                          | 1 |
| <i>circCUL5</i> | miR-2115-5p                          | 1 |
| <i>circCUL5</i> | miR-212-5p                           | 1 |
| <i>circCUL5</i> | miR-214-3p/3619-5p                   | 1 |
| <i>circCUL5</i> | miR-219b-5p                          | 1 |
| <i>circCUL5</i> | miR-22-3p                            | 1 |
| <i>circCUL5</i> | miR-223-3p                           | 1 |
| <i>circCUL5</i> | miR-26-5p                            | 2 |
| <i>circCUL5</i> | miR-2681-3p                          | 1 |
| <i>circCUL5</i> | miR-299-5p                           | 1 |

|                 |                          |   |
|-----------------|--------------------------|---|
| <i>circCUL5</i> | miR-30-3p                | 2 |
| <i>circCUL5</i> | miR-302b-5p/302d-5p      | 1 |
| <i>circCUL5</i> | miR-3065-3p              | 1 |
| <i>circCUL5</i> | miR-3120-3p              | 1 |
| <i>circCUL5</i> | miR-3121-3p              | 1 |
| <i>circCUL5</i> | miR-3126-5p              | 1 |
| <i>circCUL5</i> | miR-3127-3p/6756-3p      | 1 |
| <i>circCUL5</i> | miR-3134                 | 2 |
| <i>circCUL5</i> | miR-3144-3p              | 1 |
| <i>circCUL5</i> | miR-3146                 | 1 |
| <i>circCUL5</i> | miR-3148                 | 1 |
| <i>circCUL5</i> | miR-3153/6733-5p/6739-5p | 1 |
| <i>circCUL5</i> | miR-3160-3p              | 2 |
| <i>circCUL5</i> | miR-3173-3p/6891-5p      | 1 |
| <i>circCUL5</i> | miR-3174                 | 2 |
| <i>circCUL5</i> | miR-3182                 | 1 |
| <i>circCUL5</i> | miR-3189-3p              | 1 |
| <i>circCUL5</i> | miR-3192-5p              | 1 |
| <i>circCUL5</i> | miR-3194-5p              | 1 |
| <i>circCUL5</i> | miR-323-3p               | 1 |
| <i>circCUL5</i> | miR-335-3p               | 1 |
| <i>circCUL5</i> | miR-337-3p               | 1 |
| <i>circCUL5</i> | miR-338-3p               | 1 |
| <i>circCUL5</i> | miR-34b-5p/449c-5p       | 1 |
| <i>circCUL5</i> | miR-3605-5p              | 2 |
| <i>circCUL5</i> | miR-3606-5p              | 1 |
| <i>circCUL5</i> | miR-3612                 | 1 |
| <i>circCUL5</i> | miR-3620-3p              | 1 |
| <i>circCUL5</i> | miR-3646                 | 1 |
| <i>circCUL5</i> | miR-3653-3p              | 1 |
| <i>circCUL5</i> | miR-3664-5p              | 1 |
| <i>circCUL5</i> | miR-3677-3p              | 1 |
| <i>circCUL5</i> | miR-3688-3p              | 1 |
| <i>circCUL5</i> | miR-3691-5p              | 1 |
| <i>circCUL5</i> | miR-3692-5p              | 1 |
| <i>circCUL5</i> | miR-381-3p               | 2 |
| <i>circCUL5</i> | miR-382-3p               | 2 |
| <i>circCUL5</i> | miR-383-3p               | 1 |

|                 |                                              |   |
|-----------------|----------------------------------------------|---|
| <i>circCUL5</i> | miR-3912-5p                                  | 1 |
| <i>circCUL5</i> | miR-3913-3p                                  | 1 |
| <i>circCUL5</i> | miR-3914                                     | 1 |
| <i>circCUL5</i> | miR-3915                                     | 1 |
| <i>circCUL5</i> | miR-3918                                     | 1 |
| <i>circCUL5</i> | miR-3923                                     | 1 |
| <i>circCUL5</i> | miR-3925-3p                                  | 1 |
| <i>circCUL5</i> | miR-3928-3p                                  | 1 |
| <i>circCUL5</i> | miR-3928-5p/6806-3p                          | 1 |
| <i>circCUL5</i> | miR-3941                                     | 1 |
| <i>circCUL5</i> | miR-3945                                     | 1 |
| <i>circCUL5</i> | miR-3978                                     | 1 |
| <i>circCUL5</i> | miR-4253/6862-5p                             | 1 |
| <i>circCUL5</i> | miR-4261                                     | 1 |
| <i>circCUL5</i> | miR-4271/4725-3p/6780b-5p                    | 1 |
| <i>circCUL5</i> | miR-4280                                     | 1 |
| <i>circCUL5</i> | miR-4292/6791-5p                             | 1 |
| <i>circCUL5</i> | miR-4299                                     | 1 |
| <i>circCUL5</i> | miR-4308                                     | 1 |
| <i>circCUL5</i> | miR-4312                                     | 1 |
| <i>circCUL5</i> | miR-4316                                     | 1 |
| <i>circCUL5</i> | miR-4326                                     | 1 |
| <i>circCUL5</i> | miR-4328                                     | 1 |
| <i>circCUL5</i> | miR-4330                                     | 1 |
| <i>circCUL5</i> | miR-4419a/4510/6127/6129/6130/6133           | 1 |
| <i>circCUL5</i> | miR-4426/4647/4662b                          | 1 |
| <i>circCUL5</i> | miR-4428                                     | 1 |
| <i>circCUL5</i> | miR-4433a-5p                                 | 1 |
| <i>circCUL5</i> | miR-4433b-3p                                 | 1 |
| <i>circCUL5</i> | miR-4436b-3p/4632-5p/6735-5p/6879-5p/7843-5p | 1 |
| <i>circCUL5</i> | miR-4443                                     | 2 |
| <i>circCUL5</i> | miR-4456                                     | 1 |
| <i>circCUL5</i> | miR-4474-5p                                  | 1 |
| <i>circCUL5</i> | miR-4476/6876-5p                             | 1 |
| <i>circCUL5</i> | miR-4477a                                    | 2 |
| <i>circCUL5</i> | miR-4487                                     | 2 |
| <i>circCUL5</i> | miR-4495                                     | 1 |
| <i>circCUL5</i> | miR-4521                                     | 1 |



|                 |                     |   |
|-----------------|---------------------|---|
| <i>circCUL5</i> | miR-4528            | 1 |
| <i>circCUL5</i> | miR-4530            | 1 |
| <i>circCUL5</i> | miR-4534/8082       | 2 |
| <i>circCUL5</i> | miR-455-3p.2        | 1 |
| <i>circCUL5</i> | miR-4635            | 1 |
| <i>circCUL5</i> | miR-4639-5p         | 1 |
| <i>circCUL5</i> | miR-4645-3p         | 1 |
| <i>circCUL5</i> | miR-4645-5p/4673    | 1 |
| <i>circCUL5</i> | miR-4650-5p         | 1 |
| <i>circCUL5</i> | miR-4658/6790-5p    | 1 |
| <i>circCUL5</i> | miR-4660            | 1 |
| <i>circCUL5</i> | miR-4662a-3p        | 2 |
| <i>circCUL5</i> | miR-4666a-3p        | 2 |
| <i>circCUL5</i> | miR-4668-5p         | 1 |
| <i>circCUL5</i> | miR-4671-5p         | 1 |
| <i>circCUL5</i> | miR-4672            | 1 |
| <i>circCUL5</i> | miR-4685-5p/6837-5p | 2 |
| <i>circCUL5</i> | miR-4689/6858-5p    | 1 |
| <i>circCUL5</i> | miR-4691-5p/6792-3p | 2 |
| <i>circCUL5</i> | miR-4694-5p         | 1 |
| <i>circCUL5</i> | miR-4697-3p         | 1 |
| <i>circCUL5</i> | miR-4699-3p         | 1 |
| <i>circCUL5</i> | miR-4704-5p         | 1 |
| <i>circCUL5</i> | miR-4711-5p         | 1 |
| <i>circCUL5</i> | miR-4714-5p         | 1 |
| <i>circCUL5</i> | miR-4717-5p         | 1 |
| <i>circCUL5</i> | miR-4722-5p         | 1 |
| <i>circCUL5</i> | miR-4727-5p         | 1 |
| <i>circCUL5</i> | miR-4729            | 1 |
| <i>circCUL5</i> | miR-4733-3p         | 1 |
| <i>circCUL5</i> | miR-4736            | 1 |
| <i>circCUL5</i> | miR-4739            | 1 |
| <i>circCUL5</i> | miR-4747-5p/5196-5p | 1 |
| <i>circCUL5</i> | miR-4752            | 1 |
| <i>circCUL5</i> | miR-4755-3p         | 1 |
| <i>circCUL5</i> | miR-4755-5p/5006-3p | 1 |
| <i>circCUL5</i> | miR-4760-3p         | 1 |
| <i>circCUL5</i> | miR-4761-3p         | 1 |

|                 |                              |   |
|-----------------|------------------------------|---|
| <i>circCUL5</i> | miR-4764-3p                  | 1 |
| <i>circCUL5</i> | miR-4769-3p/6817-5p          | 1 |
| <i>circCUL5</i> | miR-4802-5p                  | 1 |
| <i>circCUL5</i> | miR-488-3p                   | 1 |
| <i>circCUL5</i> | miR-494-3p                   | 1 |
| <i>circCUL5</i> | miR-499a-3p/499b-3p          | 1 |
| <i>circCUL5</i> | miR-5000-3p                  | 1 |
| <i>circCUL5</i> | miR-5001-3p                  | 1 |
| <i>circCUL5</i> | miR-5006-5p                  | 1 |
| <i>circCUL5</i> | miR-5007-5p                  | 1 |
| <i>circCUL5</i> | miR-503-5p                   | 1 |
| <i>circCUL5</i> | miR-505-5p                   | 1 |
| <i>circCUL5</i> | miR-5088-3p                  | 1 |
| <i>circCUL5</i> | miR-5089-3p                  | 1 |
| <i>circCUL5</i> | miR-512-5p                   | 1 |
| <i>circCUL5</i> | miR-514a-5p                  | 1 |
| <i>circCUL5</i> | miR-516a-3p/516b-3p/7162-5p  | 1 |
| <i>circCUL5</i> | miR-524-5p                   | 1 |
| <i>circCUL5</i> | miR-543                      | 2 |
| <i>circCUL5</i> | miR-544a                     | 1 |
| <i>circCUL5</i> | miR-545-5p                   | 1 |
| <i>circCUL5</i> | miR-548ai/548ag/548ba/570-5p | 1 |
| <i>circCUL5</i> | miR-548ao-5p/548ax           | 1 |
| <i>circCUL5</i> | miR-548q                     | 1 |
| <i>circCUL5</i> | miR-555                      | 1 |
| <i>circCUL5</i> | miR-556-3p                   | 1 |
| <i>circCUL5</i> | miR-556-5p                   | 1 |
| <i>circCUL5</i> | miR-5579-5p                  | 2 |
| <i>circCUL5</i> | miR-558                      | 2 |
| <i>circCUL5</i> | miR-5585-5p                  | 1 |
| <i>circCUL5</i> | miR-5588-3p                  | 1 |
| <i>circCUL5</i> | miR-561-5p                   | 1 |
| <i>circCUL5</i> | miR-5680                     | 1 |
| <i>circCUL5</i> | miR-5681a                    | 1 |
| <i>circCUL5</i> | miR-5690                     | 1 |
| <i>circCUL5</i> | miR-5696                     | 1 |
| <i>circCUL5</i> | miR-570-3p                   | 1 |
| <i>circCUL5</i> | miR-5702                     | 1 |

|                 |                    |   |
|-----------------|--------------------|---|
| <i>circCUL5</i> | miR-578            | 1 |
| <i>circCUL5</i> | miR-579-3p         | 1 |
| <i>circCUL5</i> | miR-580-5p         | 2 |
| <i>circCUL5</i> | miR-584-5p         | 2 |
| <i>circCUL5</i> | miR-593-3p         | 1 |
| <i>circCUL5</i> | miR-6080           | 1 |
| <i>circCUL5</i> | miR-6124           | 1 |
| <i>circCUL5</i> | miR-6131           | 1 |
| <i>circCUL5</i> | miR-618            | 1 |
| <i>circCUL5</i> | miR-619-5p/6506-5p | 1 |
| <i>circCUL5</i> | miR-624-3p         | 1 |
| <i>circCUL5</i> | miR-630            | 1 |
| <i>circCUL5</i> | miR-633            | 1 |
| <i>circCUL5</i> | miR-646            | 1 |
| <i>circCUL5</i> | miR-6504-3p        | 1 |
| <i>circCUL5</i> | miR-651-3p         | 1 |
| <i>circCUL5</i> | miR-651-5p         | 1 |
| <i>circCUL5</i> | miR-6514-5p        | 1 |
| <i>circCUL5</i> | miR-6515-5p        | 2 |
| <i>circCUL5</i> | miR-6516-5p        | 1 |
| <i>circCUL5</i> | miR-670-3p         | 1 |
| <i>circCUL5</i> | miR-670-5p         | 1 |
| <i>circCUL5</i> | miR-671-5p         | 1 |
| <i>circCUL5</i> | miR-6728-3p        | 1 |
| <i>circCUL5</i> | miR-6730-5p        | 1 |
| <i>circCUL5</i> | miR-6738-3p        | 1 |
| <i>circCUL5</i> | miR-6742-3p        | 1 |
| <i>circCUL5</i> | miR-6749-3p        | 2 |
| <i>circCUL5</i> | miR-6753-5p        | 1 |
| <i>circCUL5</i> | miR-6760-5p        | 1 |
| <i>circCUL5</i> | miR-6768-5p        | 1 |
| <i>circCUL5</i> | miR-6776-5p        | 2 |
| <i>circCUL5</i> | miR-6783-5p        | 1 |
| <i>circCUL5</i> | miR-6796-3p        | 1 |
| <i>circCUL5</i> | miR-6798-5p        | 1 |
| <i>circCUL5</i> | miR-6799-5p        | 1 |
| <i>circCUL5</i> | miR-6816-3p        | 2 |
| <i>circCUL5</i> | miR-6822-3p        | 1 |

|                 |              |   |
|-----------------|--------------|---|
| <i>circCUL5</i> | miR-6826-3p  | 1 |
| <i>circCUL5</i> | miR-6827-5p  | 1 |
| <i>circCUL5</i> | miR-6828-5p  | 1 |
| <i>circCUL5</i> | miR-6830-3p  | 2 |
| <i>circCUL5</i> | miR-6830-5p  | 2 |
| <i>circCUL5</i> | miR-6833-5p  | 1 |
| <i>circCUL5</i> | miR-6844     | 2 |
| <i>circCUL5</i> | miR-6852-5p  | 1 |
| <i>circCUL5</i> | miR-6861-5p  | 2 |
| <i>circCUL5</i> | miR-6879-3p  | 1 |
| <i>circCUL5</i> | miR-6880-3p  | 1 |
| <i>circCUL5</i> | miR-6884-3p  | 1 |
| <i>circCUL5</i> | miR-6894-5p  | 2 |
| <i>circCUL5</i> | miR-6895-3p  | 1 |
| <i>circCUL5</i> | miR-7106-5p  | 1 |
| <i>circCUL5</i> | miR-7112-3p  | 1 |
| <i>circCUL5</i> | miR-7113-5p  | 2 |
| <i>circCUL5</i> | miR-7114-5p  | 1 |
| <i>circCUL5</i> | miR-7154-3p  | 2 |
| <i>circCUL5</i> | miR-7158-5p  | 1 |
| <i>circCUL5</i> | miR-759      | 1 |
| <i>circCUL5</i> | miR-760      | 1 |
| <i>circCUL5</i> | miR-765      | 2 |
| <i>circCUL5</i> | miR-766-3p   | 1 |
| <i>circCUL5</i> | miR-766-5p   | 2 |
| <i>circCUL5</i> | miR-767-3p   | 1 |
| <i>circCUL5</i> | miR-7847-3p  | 1 |
| <i>circCUL5</i> | miR-7855-5p  | 1 |
| <i>circCUL5</i> | miR-7978     | 1 |
| <i>circCUL5</i> | miR-802      | 1 |
| <i>circCUL5</i> | miR-8055     | 1 |
| <i>circCUL5</i> | miR-8056     | 1 |
| <i>circCUL5</i> | miR-8060     | 1 |
| <i>circCUL5</i> | miR-8069     | 1 |
| <i>circCUL5</i> | miR-8076     | 1 |
| <i>circCUL5</i> | miR-8080     | 2 |
| <i>circCUL5</i> | miR-873-5p.2 | 1 |
| <i>circCUL5</i> | miR-921      | 1 |

|                 |                         |   |
|-----------------|-------------------------|---|
| <i>circCUL5</i> | miR-922                 | 1 |
| <i>circCUL5</i> | miR-93-3p               | 1 |
| <i>circCUL5</i> | miR-936                 | 1 |
| <i>circCUL5</i> | miR-939-3p              | 1 |
| <i>circCUL5</i> | miR-940/6808-5p/6893-5p | 1 |
| <i>circCUL5</i> | miR-96-3p               | 1 |
| <i>circCUL5</i> | miR-96-5p/1271-5p       | 1 |
| <i>circCUL5</i> | miR-99-3p               | 1 |
| <i>circCUL5</i> | miR-100-3p              | 2 |
| <i>circCUL5</i> | miR-1180-3p             | 1 |
| <i>circCUL5</i> | miR-1200                | 1 |
| <i>circCUL5</i> | miR-1255b-2-3p          | 1 |
| <i>circCUL5</i> | miR-126-5p              | 1 |
| <i>circCUL5</i> | miR-1273f               | 1 |
| <i>circCUL5</i> | miR-1273g-5p            | 1 |
| <i>circCUL5</i> | miR-1287-3p             | 1 |
| <i>circCUL5</i> | miR-140-5p              | 1 |
| <i>circCUL5</i> | miR-142-5p              | 1 |
| <i>circCUL5</i> | miR-143-3p              | 1 |
| <i>circCUL5</i> | miR-145-5p              | 1 |
| <i>circCUL5</i> | miR-154-3p/487-3p       | 1 |
| <i>circCUL5</i> | miR-155-5p              | 1 |
| <i>circCUL5</i> | miR-182-3p              | 3 |
| <i>circCUL5</i> | miR-192-3p              | 2 |
| <i>circCUL5</i> | miR-193a-5p             | 1 |
| <i>circCUL5</i> | miR-203a-5p             | 1 |
| <i>circCUL5</i> | miR-21-5p/590-5p        | 1 |
| <i>circCUL5</i> | miR-2113                | 1 |
| <i>circCUL5</i> | miR-218-1-3p            | 3 |
| <i>circCUL5</i> | miR-218-2-3p            | 3 |
| <i>circCUL5</i> | miR-23-5p               | 1 |
| <i>circCUL5</i> | miR-302a-5p             | 2 |
| <i>circCUL5</i> | miR-3127-5p             | 1 |
| <i>circCUL5</i> | miR-3140-5p             | 1 |
| <i>circCUL5</i> | miR-32-3p               | 1 |
| <i>circCUL5</i> | miR-320e                | 1 |
| <i>circCUL5</i> | miR-326                 | 1 |
| <i>circCUL5</i> | miR-33-5p               | 2 |

|                 |                       |   |
|-----------------|-----------------------|---|
| <i>circCUL5</i> | miR-33a-3p            | 1 |
| <i>circCUL5</i> | miR-345-3p            | 1 |
| <i>circCUL5</i> | miR-34a-3p            | 1 |
| <i>circCUL5</i> | miR-3617-3p           | 1 |
| <i>circCUL5</i> | miR-365-3p            | 1 |
| <i>circCUL5</i> | miR-3658              | 1 |
| <i>circCUL5</i> | miR-3671              | 1 |
| <i>circCUL5</i> | miR-3672/6864-3p      | 1 |
| <i>circCUL5</i> | miR-3674              | 1 |
| <i>circCUL5</i> | miR-3682-3p           | 1 |
| <i>circCUL5</i> | miR-378a-5p           | 1 |
| <i>circCUL5</i> | miR-3909              | 2 |
| <i>circCUL5</i> | miR-3920              | 1 |
| <i>circCUL5</i> | miR-3937              | 1 |
| <i>circCUL5</i> | miR-3942-3p           | 2 |
| <i>circCUL5</i> | miR-409-5p            | 1 |
| <i>circCUL5</i> | miR-4270/4441/6754-5p | 1 |
| <i>circCUL5</i> | miR-4277              | 1 |
| <i>circCUL5</i> | miR-4314              | 1 |
| <i>circCUL5</i> | miR-4427              | 1 |
| <i>circCUL5</i> | miR-4432              | 1 |
| <i>circCUL5</i> | miR-4453/4538         | 2 |
| <i>circCUL5</i> | miR-4490              | 1 |
| <i>circCUL5</i> | miR-4524a-3p          | 1 |
| <i>circCUL5</i> | miR-4664-3p           | 1 |
| <i>circCUL5</i> | miR-4680-3p           | 1 |
| <i>circCUL5</i> | miR-4684-3p           | 1 |
| <i>circCUL5</i> | miR-4708-5p           | 1 |
| <i>circCUL5</i> | miR-4712-3p           | 1 |
| <i>circCUL5</i> | miR-4724-5p           | 2 |
| <i>circCUL5</i> | miR-4762-5p           | 2 |
| <i>circCUL5</i> | miR-4766-5p           | 2 |
| <i>circCUL5</i> | miR-4774-5p           | 1 |
| <i>circCUL5</i> | miR-4777-3p           | 1 |
| <i>circCUL5</i> | miR-4795-5p           | 1 |
| <i>circCUL5</i> | miR-487a-5p/487b-5p   | 1 |
| <i>circCUL5</i> | miR-489-3p            | 1 |
| <i>circCUL5</i> | miR-5000-5p           | 3 |

|                 |                          |   |
|-----------------|--------------------------|---|
| <i>circCUL5</i> | miR-5003-3p              | 1 |
| <i>circCUL5</i> | miR-5010-3p              | 1 |
| <i>circCUL5</i> | miR-506-5p               | 1 |
| <i>circCUL5</i> | miR-5100                 | 1 |
| <i>circCUL5</i> | miR-5187-3p              | 1 |
| <i>circCUL5</i> | miR-518a-5p/527          | 2 |
| <i>circCUL5</i> | miR-518c-5p              | 1 |
| <i>circCUL5</i> | miR-5193                 | 1 |
| <i>circCUL5</i> | miR-548aw                | 2 |
| <i>circCUL5</i> | miR-551b-5p              | 1 |
| <i>circCUL5</i> | miR-566                  | 1 |
| <i>circCUL5</i> | miR-584-3p               | 1 |
| <i>circCUL5</i> | miR-589-3p               | 1 |
| <i>circCUL5</i> | miR-6083                 | 1 |
| <i>circCUL5</i> | miR-653-5p               | 2 |
| <i>circCUL5</i> | miR-659-3p               | 2 |
| <i>circCUL5</i> | miR-660-3p               | 1 |
| <i>circCUL5</i> | miR-676-3p               | 1 |
| <i>circCUL5</i> | miR-676-5p               | 1 |
| <i>circCUL5</i> | miR-6764-3p/6824-3p      | 1 |
| <i>circCUL5</i> | miR-6789-3p              | 1 |
| <i>circCUL5</i> | miR-6834-3p              | 1 |
| <i>circCUL5</i> | miR-6838-3p              | 2 |
| <i>circCUL5</i> | miR-6872-3p              | 1 |
| <i>circCUL5</i> | miR-8065                 | 1 |
| <i>circCUL5</i> | miR-8075                 | 1 |
| <i>circCUL5</i> | miR-8087                 | 1 |
| <i>circCUL5</i> | miR-875-5p               | 1 |
| <i>circCUL5</i> | miR-877-3p               | 2 |
| <i>circCUL5</i> | miR-892-5p               | 1 |
| <i>circCUL5</i> | miR-892b                 | 1 |
| <i>circCUL5</i> | miR-9-5p                 | 2 |
| <i>circCUL5</i> | miR-935                  | 1 |
| <i>circCUL5</i> | miR-942-3p               | 1 |
| <i>circCUL5</i> | miR-1206                 | 1 |
| <i>circCUL5</i> | miR-1236-3p              | 1 |
| <i>circCUL5</i> | miR-1253                 | 1 |
| <i>circCUL5</i> | miR-1262/4701-3p/6736-5p | 1 |

|                 |                    |   |
|-----------------|--------------------|---|
| <i>circCUL5</i> | miR-1282           | 1 |
| <i>circCUL5</i> | miR-1304-5p        | 1 |
| <i>circCUL5</i> | miR-1323           | 1 |
| <i>circCUL5</i> | miR-1343-3p        | 1 |
| <i>circCUL5</i> | miR-152-5p         | 1 |
| <i>circCUL5</i> | miR-181-3p/4420    | 1 |
| <i>circCUL5</i> | miR-1976           | 1 |
| <i>circCUL5</i> | miR-203b-3p        | 2 |
| <i>circCUL5</i> | miR-205-5p         | 1 |
| <i>circCUL5</i> | miR-20b-3p         | 1 |
| <i>circCUL5</i> | miR-2116-5p        | 1 |
| <i>circCUL5</i> | miR-219a-1-3p      | 1 |
| <i>circCUL5</i> | miR-22-5p          | 1 |
| <i>circCUL5</i> | miR-2276-3p        | 1 |
| <i>circCUL5</i> | miR-26-3p          | 1 |
| <i>circCUL5</i> | miR-2681-5p        | 1 |
| <i>circCUL5</i> | miR-3121-5p        | 1 |
| <i>circCUL5</i> | miR-3122/3913-5p   | 1 |
| <i>circCUL5</i> | miR-3137           | 1 |
| <i>circCUL5</i> | miR-329-5p         | 1 |
| <i>circCUL5</i> | miR-3529-3p        | 1 |
| <i>circCUL5</i> | miR-362-5p/500b-5p | 1 |
| <i>circCUL5</i> | miR-3653-5p        | 1 |
| <i>circCUL5</i> | miR-3667-5p        | 1 |
| <i>circCUL5</i> | miR-3680-3p        | 1 |
| <i>circCUL5</i> | miR-377-5p/6086    | 1 |
| <i>circCUL5</i> | miR-382-5p         | 1 |
| <i>circCUL5</i> | miR-3940-5p/4507   | 1 |
| <i>circCUL5</i> | miR-4509           | 1 |
| <i>circCUL5</i> | miR-450a-1-3p      | 1 |
| <i>circCUL5</i> | miR-450b-5p        | 1 |
| <i>circCUL5</i> | miR-4539           | 2 |
| <i>circCUL5</i> | miR-4680-5p        | 1 |
| <i>circCUL5</i> | miR-4705           | 1 |
| <i>circCUL5</i> | miR-4710           | 1 |
| <i>circCUL5</i> | miR-4724-3p        | 1 |
| <i>circCUL5</i> | miR-4744           | 1 |
| <i>circCUL5</i> | miR-4762-3p        | 1 |



|                 |                                               |   |
|-----------------|-----------------------------------------------|---|
| <i>circCUL5</i> | miR-4772-3p                                   | 1 |
| <i>circCUL5</i> | miR-4792                                      | 1 |
| <i>circCUL5</i> | miR-4793-5p                                   | 1 |
| <i>circCUL5</i> | miR-483-3p.1                                  | 1 |
| <i>circCUL5</i> | miR-495-5p                                    | 1 |
| <i>circCUL5</i> | miR-501-5p                                    | 1 |
| <i>circCUL5</i> | miR-507/557                                   | 1 |
| <i>circCUL5</i> | miR-5195-5p                                   | 1 |
| <i>circCUL5</i> | miR-5196-3p                                   | 1 |
| <i>circCUL5</i> | miR-5197-3p                                   | 1 |
| <i>circCUL5</i> | miR-539-3p                                    | 1 |
| <i>circCUL5</i> | miR-548ao-3p                                  | 1 |
| <i>circCUL5</i> | miR-548av-3p                                  | 1 |
| <i>circCUL5</i> | miR-548az-3p/548ar-3p/548a-3p/548e-3p/548f-3p | 1 |
| <i>circCUL5</i> | miR-5582-3p                                   | 1 |
| <i>circCUL5</i> | miR-5707                                      | 1 |
| <i>circCUL5</i> | miR-571                                       | 1 |
| <i>circCUL5</i> | miR-591                                       | 1 |
| <i>circCUL5</i> | miR-597-3p                                    | 1 |
| <i>circCUL5</i> | miR-627-3p                                    | 1 |
| <i>circCUL5</i> | miR-6502-3p                                   | 1 |
| <i>circCUL5</i> | miR-6513-5p                                   | 1 |
| <i>circCUL5</i> | miR-6515-3p                                   | 1 |
| <i>circCUL5</i> | miR-653-3p                                    | 1 |
| <i>circCUL5</i> | miR-655-5p                                    | 1 |
| <i>circCUL5</i> | miR-6731-3p                                   | 1 |
| <i>circCUL5</i> | miR-6741-5p                                   | 1 |
| <i>circCUL5</i> | miR-6755-5p                                   | 1 |
| <i>circCUL5</i> | miR-6770-5p                                   | 1 |
| <i>circCUL5</i> | miR-6782-3p                                   | 1 |
| <i>circCUL5</i> | miR-6798-3p                                   | 1 |
| <i>circCUL5</i> | miR-6832-3p                                   | 1 |
| <i>circCUL5</i> | miR-6839-3p                                   | 1 |
| <i>circCUL5</i> | miR-6841-5p                                   | 1 |
| <i>circCUL5</i> | miR-6853-3p                                   | 1 |
| <i>circCUL5</i> | miR-6868-3p                                   | 1 |
| <i>circCUL5</i> | miR-6870-3p                                   | 1 |
| <i>circCUL5</i> | miR-6873-5p                                   | 1 |

|                 |                      |   |
|-----------------|----------------------|---|
| <i>circCUL5</i> | miR-7158-3p          | 2 |
| <i>circCUL5</i> | miR-8081             | 1 |
| <i>circCUL5</i> | miR-887-5p           | 1 |
| <i>circCUX1</i> | miR-105-3p           | 1 |
| <i>circCUX1</i> | miR-1184             | 1 |
| <i>circCUX1</i> | miR-1203             | 1 |
| <i>circCUX1</i> | miR-1205             | 1 |
| <i>circCUX1</i> | miR-1207-3p          | 1 |
| <i>circCUX1</i> | miR-1207-5p/4763-3p  | 1 |
| <i>circCUX1</i> | miR-1226-5p          | 1 |
| <i>circCUX1</i> | miR-1236-3p          | 1 |
| <i>circCUX1</i> | miR-1243             | 1 |
| <i>circCUX1</i> | miR-1266-5p/4518     | 1 |
| <i>circCUX1</i> | miR-1275/4665-5p     | 1 |
| <i>circCUX1</i> | miR-1281             | 1 |
| <i>circCUX1</i> | miR-1287-5p          | 1 |
| <i>circCUX1</i> | miR-1289             | 1 |
| <i>circCUX1</i> | miR-1301-3p          | 1 |
| <i>circCUX1</i> | miR-1304-3p          | 1 |
| <i>circCUX1</i> | miR-134-3p           | 1 |
| <i>circCUX1</i> | miR-135-5p           | 1 |
| <i>circCUX1</i> | miR-136-3p           | 1 |
| <i>circCUX1</i> | miR-138-1-3p         | 1 |
| <i>circCUX1</i> | miR-1587/3620-5p     | 2 |
| <i>circCUX1</i> | miR-17-3p            | 1 |
| <i>circCUX1</i> | miR-181-3p/4420      | 2 |
| <i>circCUX1</i> | miR-1827             | 1 |
| <i>circCUX1</i> | miR-185-5p           | 1 |
| <i>circCUX1</i> | miR-187-5p           | 1 |
| <i>circCUX1</i> | miR-1908-5p          | 1 |
| <i>circCUX1</i> | miR-1909-3p/6722-3p  | 1 |
| <i>circCUX1</i> | miR-1910-3p/6511a-5p | 1 |
| <i>circCUX1</i> | miR-1915-5p          | 1 |
| <i>circCUX1</i> | miR-198              | 1 |
| <i>circCUX1</i> | miR-202-3p           | 1 |
| <i>circCUX1</i> | miR-204-3p/4646-5p   | 1 |
| <i>circCUX1</i> | miR-205-5p           | 1 |
| <i>circCUX1</i> | miR-2355-3p          | 1 |

|                 |                                              |   |
|-----------------|----------------------------------------------|---|
| <i>circCUX1</i> | miR-2392                                     | 1 |
| <i>circCUX1</i> | miR-25-5p                                    | 1 |
| <i>circCUX1</i> | miR-29-3p                                    | 1 |
| <i>circCUX1</i> | miR-3065-3p                                  | 1 |
| <i>circCUX1</i> | miR-30b-3p/1273h-5p/3689-3p/6779-5p/6780a-5p | 1 |
| <i>circCUX1</i> | miR-30c-3p/6788-5p                           | 1 |
| <i>circCUX1</i> | miR-3127-5p                                  | 1 |
| <i>circCUX1</i> | miR-3135b                                    | 1 |
| <i>circCUX1</i> | miR-3144-5p                                  | 3 |
| <i>circCUX1</i> | miR-3158-3p                                  | 2 |
| <i>circCUX1</i> | miR-3158-5p                                  | 1 |
| <i>circCUX1</i> | miR-3191-3p                                  | 3 |
| <i>circCUX1</i> | miR-3192-5p                                  | 1 |
| <i>circCUX1</i> | miR-3194-3p                                  | 1 |
| <i>circCUX1</i> | miR-3199/8052                                | 1 |
| <i>circCUX1</i> | miR-323b-5p/410-5p/494-5p                    | 2 |
| <i>circCUX1</i> | miR-326                                      | 1 |
| <i>circCUX1</i> | miR-328-5p/6885-5p                           | 1 |
| <i>circCUX1</i> | miR-329-5p                                   | 1 |
| <i>circCUX1</i> | miR-34b-5p/449c-5p                           | 1 |
| <i>circCUX1</i> | miR-3616-3p                                  | 1 |
| <i>circCUX1</i> | miR-3619-3p                                  | 1 |
| <i>circCUX1</i> | miR-3621                                     | 1 |
| <i>circCUX1</i> | miR-3652/4430                                | 1 |
| <i>circCUX1</i> | miR-3654                                     | 1 |
| <i>circCUX1</i> | miR-3656                                     | 1 |
| <i>circCUX1</i> | miR-3657                                     | 2 |
| <i>circCUX1</i> | miR-3659                                     | 1 |
| <i>circCUX1</i> | miR-365a-5p/365b-5p                          | 1 |
| <i>circCUX1</i> | miR-3664-3p                                  | 1 |
| <i>circCUX1</i> | miR-3675-5p                                  | 1 |
| <i>circCUX1</i> | miR-3680-5p                                  | 1 |
| <i>circCUX1</i> | miR-3692-5p                                  | 1 |
| <i>circCUX1</i> | miR-377-5p/6086                              | 1 |
| <i>circCUX1</i> | miR-378-3p                                   | 1 |
| <i>circCUX1</i> | miR-378g                                     | 1 |
| <i>circCUX1</i> | miR-383-3p                                   | 1 |
| <i>circCUX1</i> | miR-3912-5p                                  | 1 |

|                 |                                  |   |
|-----------------|----------------------------------|---|
| <i>circCUX1</i> | miR-3918                         | 2 |
| <i>circCUX1</i> | miR-412-3p/6754-3p               | 2 |
| <i>circCUX1</i> | miR-423-3p                       | 1 |
| <i>circCUX1</i> | miR-4265/4296/4322               | 1 |
| <i>circCUX1</i> | miR-4267                         | 2 |
| <i>circCUX1</i> | miR-4291                         | 1 |
| <i>circCUX1</i> | miR-4294                         | 1 |
| <i>circCUX1</i> | miR-4299                         | 1 |
| <i>circCUX1</i> | miR-432-3p                       | 1 |
| <i>circCUX1</i> | miR-432-5p                       | 1 |
| <i>circCUX1</i> | miR-4327                         | 1 |
| <i>circCUX1</i> | miR-4417                         | 1 |
| <i>circCUX1</i> | miR-4431                         | 1 |
| <i>circCUX1</i> | miR-4437                         | 1 |
| <i>circCUX1</i> | miR-4446-3p                      | 2 |
| <i>circCUX1</i> | miR-4456                         | 1 |
| <i>circCUX1</i> | miR-4486                         | 1 |
| <i>circCUX1</i> | miR-4497                         | 1 |
| <i>circCUX1</i> | miR-4505/5787                    | 1 |
| <i>circCUX1</i> | miR-4512                         | 1 |
| <i>circCUX1</i> | miR-4535                         | 1 |
| <i>circCUX1</i> | miR-4633-5p                      | 1 |
| <i>circCUX1</i> | miR-4638-3p                      | 1 |
| <i>circCUX1</i> | miR-4646-3p                      | 1 |
| <i>circCUX1</i> | miR-4649-3p                      | 1 |
| <i>circCUX1</i> | miR-4652-5p                      | 3 |
| <i>circCUX1</i> | miR-4656                         | 3 |
| <i>circCUX1</i> | miR-4660                         | 1 |
| <i>circCUX1</i> | miR-4663                         | 1 |
| <i>circCUX1</i> | miR-4669                         | 2 |
| <i>circCUX1</i> | miR-4674                         | 2 |
| <i>circCUX1</i> | miR-4675/4741                    | 3 |
| <i>circCUX1</i> | miR-4680-5p                      | 1 |
| <i>circCUX1</i> | miR-4688/6743-5p                 | 1 |
| <i>circCUX1</i> | miR-4706/4749-5p                 | 1 |
| <i>circCUX1</i> | miR-4721                         | 1 |
| <i>circCUX1</i> | miR-4723-5p/5698/6870-5p/7111-5p | 1 |
| <i>circCUX1</i> | miR-4728-3p                      | 2 |

|                 |                                      |   |
|-----------------|--------------------------------------|---|
| <i>circCUX1</i> | miR-4730                             | 2 |
| <i>circCUX1</i> | miR-4731-5p                          | 1 |
| <i>circCUX1</i> | miR-4735-5p                          | 1 |
| <i>circCUX1</i> | miR-4736                             | 1 |
| <i>circCUX1</i> | miR-4776-5p                          | 1 |
| <i>circCUX1</i> | miR-4781-5p                          | 1 |
| <i>circCUX1</i> | miR-4785                             | 1 |
| <i>circCUX1</i> | miR-4798-3p                          | 1 |
| <i>circCUX1</i> | miR-4802-3p                          | 1 |
| <i>circCUX1</i> | miR-484/3155                         | 1 |
| <i>circCUX1</i> | miR-486-3p                           | 1 |
| <i>circCUX1</i> | miR-487a-5p/487b-5p                  | 1 |
| <i>circCUX1</i> | miR-491-3p                           | 1 |
| <i>circCUX1</i> | miR-5004-3p                          | 1 |
| <i>circCUX1</i> | miR-5010-5p                          | 1 |
| <i>circCUX1</i> | miR-502-5p                           | 1 |
| <i>circCUX1</i> | miR-5088-5p                          | 2 |
| <i>circCUX1</i> | miR-5091                             | 1 |
| <i>circCUX1</i> | miR-512-5p                           | 1 |
| <i>circCUX1</i> | miR-518c-5p                          | 1 |
| <i>circCUX1</i> | miR-5192                             | 1 |
| <i>circCUX1</i> | miR-5193                             | 1 |
| <i>circCUX1</i> | miR-542-5p                           | 1 |
| <i>circCUX1</i> | miR-548q                             | 1 |
| <i>circCUX1</i> | miR-5571-5p                          | 1 |
| <i>circCUX1</i> | miR-5580-5p                          | 2 |
| <i>circCUX1</i> | miR-5589-5p                          | 1 |
| <i>circCUX1</i> | miR-5739                             | 1 |
| <i>circCUX1</i> | miR-574-5p                           | 1 |
| <i>circCUX1</i> | miR-578                              | 1 |
| <i>circCUX1</i> | miR-604                              | 2 |
| <i>circCUX1</i> | miR-6085/6813-5p                     | 1 |
| <i>circCUX1</i> | miR-612/1285-3p/3187-5p/5189-5p/6860 | 1 |
| <i>circCUX1</i> | miR-6128                             | 1 |
| <i>circCUX1</i> | miR-6132/6836-5p                     | 1 |
| <i>circCUX1</i> | miR-619-5p/6506-5p                   | 1 |
| <i>circCUX1</i> | miR-625-5p                           | 1 |
| <i>circCUX1</i> | miR-626/6876-3p                      | 1 |

|                 |                     |   |
|-----------------|---------------------|---|
| <i>circCUX1</i> | miR-628-5p          | 1 |
| <i>circCUX1</i> | miR-634             | 1 |
| <i>circCUX1</i> | miR-6510-3p         | 1 |
| <i>circCUX1</i> | miR-6515-3p         | 1 |
| <i>circCUX1</i> | miR-653-3p          | 2 |
| <i>circCUX1</i> | miR-655-5p          | 1 |
| <i>circCUX1</i> | miR-658             | 1 |
| <i>circCUX1</i> | miR-659-3p          | 1 |
| <i>circCUX1</i> | miR-660-3p          | 1 |
| <i>circCUX1</i> | miR-668-3p          | 1 |
| <i>circCUX1</i> | miR-6720-5p         | 1 |
| <i>circCUX1</i> | miR-6721-5p         | 1 |
| <i>circCUX1</i> | miR-6727-5p         | 1 |
| <i>circCUX1</i> | miR-6734-5p         | 1 |
| <i>circCUX1</i> | miR-6736-3p         | 2 |
| <i>circCUX1</i> | miR-6750-3p         | 1 |
| <i>circCUX1</i> | miR-6751-5p/6803-5p | 1 |
| <i>circCUX1</i> | miR-6755-3p         | 1 |
| <i>circCUX1</i> | miR-6758-5p/6856-5p | 1 |
| <i>circCUX1</i> | miR-6759-5p         | 1 |
| <i>circCUX1</i> | miR-676-3p          | 1 |
| <i>circCUX1</i> | miR-676-5p          | 1 |
| <i>circCUX1</i> | miR-6762-3p         | 2 |
| <i>circCUX1</i> | miR-6764-3p/6824-3p | 1 |
| <i>circCUX1</i> | miR-6770-3p         | 2 |
| <i>circCUX1</i> | miR-6777-5p/6889-5p | 2 |
| <i>circCUX1</i> | miR-6781-5p         | 1 |
| <i>circCUX1</i> | miR-6784-5p         | 1 |
| <i>circCUX1</i> | miR-6795-5p/6887-5p | 1 |
| <i>circCUX1</i> | miR-6796-5p         | 1 |
| <i>circCUX1</i> | miR-6798-5p         | 1 |
| <i>circCUX1</i> | miR-6800-5p         | 1 |
| <i>circCUX1</i> | miR-6801-5p         | 1 |
| <i>circCUX1</i> | miR-6802-3p         | 1 |
| <i>circCUX1</i> | miR-6802-5p         | 1 |
| <i>circCUX1</i> | miR-6804-3p         | 1 |
| <i>circCUX1</i> | miR-6822-3p         | 2 |
| <i>circCUX1</i> | miR-6829-5p         | 3 |

|                 |                           |   |
|-----------------|---------------------------|---|
| <i>circCUX1</i> | miR-6834-5p               | 1 |
| <i>circCUX1</i> | miR-6837-3p               | 2 |
| <i>circCUX1</i> | miR-6841-3p               | 1 |
| <i>circCUX1</i> | miR-6868-3p               | 1 |
| <i>circCUX1</i> | miR-6870-3p               | 1 |
| <i>circCUX1</i> | miR-6871-3p               | 1 |
| <i>circCUX1</i> | miR-6877-5p               | 1 |
| <i>circCUX1</i> | miR-6890-5p               | 1 |
| <i>circCUX1</i> | miR-6895-5p               | 1 |
| <i>circCUX1</i> | miR-7109-5p               | 1 |
| <i>circCUX1</i> | miR-7156-3p               | 1 |
| <i>circCUX1</i> | miR-7160-3p               | 1 |
| <i>circCUX1</i> | miR-7160-5p               | 1 |
| <i>circCUX1</i> | miR-7162-3p               | 1 |
| <i>circCUX1</i> | miR-744-5p                | 1 |
| <i>circCUX1</i> | miR-760                   | 2 |
| <i>circCUX1</i> | miR-762/4492/4498/5001-5p | 3 |
| <i>circCUX1</i> | miR-7978                  | 1 |
| <i>circCUX1</i> | miR-8077                  | 1 |
| <i>circCUX1</i> | miR-8088                  | 1 |
| <i>circCUX1</i> | miR-885-3p                | 1 |
| <i>circCUX1</i> | miR-889-5p                | 1 |
| <i>circCUX1</i> | miR-93-3p                 | 1 |
| <i>circCUX1</i> | miR-940/6808-5p/6893-5p   | 1 |
| <i>circDEK</i>  | let-7a-2-3p/let-7g-3p     | 1 |
| <i>circDEK</i>  | let-7c-3p                 | 1 |
| <i>circDEK</i>  | miR-1-3p/206              | 1 |
| <i>circDEK</i>  | miR-103-3p/107            | 2 |
| <i>circDEK</i>  | miR-105-5p                | 1 |
| <i>circDEK</i>  | miR-106a-3p               | 1 |
| <i>circDEK</i>  | miR-1180-5p               | 1 |
| <i>circDEK</i>  | miR-1184                  | 1 |
| <i>circDEK</i>  | miR-1185-5p               | 6 |
| <i>circDEK</i>  | miR-1197                  | 1 |
| <i>circDEK</i>  | miR-1200                  | 1 |
| <i>circDEK</i>  | miR-1205                  | 1 |
| <i>circDEK</i>  | miR-1224-5p               | 3 |
| <i>circDEK</i>  | miR-1227-3p               | 2 |

|                |                     |   |
|----------------|---------------------|---|
| <i>circDEK</i> | miR-1233-3p         | 1 |
| <i>circDEK</i> | miR-1233-5p/6778-5p | 2 |
| <i>circDEK</i> | miR-1236-3p         | 1 |
| <i>circDEK</i> | miR-1237-3p         | 2 |
| <i>circDEK</i> | miR-124-3p.1        | 3 |
| <i>circDEK</i> | miR-1244            | 2 |
| <i>circDEK</i> | miR-1245a/8079      | 3 |
| <i>circDEK</i> | miR-1245b-3p        | 8 |
| <i>circDEK</i> | miR-1248            | 2 |
| <i>circDEK</i> | miR-1250-3p         | 2 |
| <i>circDEK</i> | miR-1252-5p         | 3 |
| <i>circDEK</i> | miR-1253            | 1 |
| <i>circDEK</i> | miR-125a-3p         | 2 |
| <i>circDEK</i> | miR-126-5p          | 1 |
| <i>circDEK</i> | miR-1264            | 1 |
| <i>circDEK</i> | miR-1270            | 3 |
| <i>circDEK</i> | miR-1272            | 4 |
| <i>circDEK</i> | miR-1273e           | 1 |
| <i>circDEK</i> | miR-1273h-3p        | 1 |
| <i>circDEK</i> | miR-1276            | 6 |
| <i>circDEK</i> | miR-1277-5p         | 4 |
| <i>circDEK</i> | miR-1279            | 1 |
| <i>circDEK</i> | miR-1283            | 1 |
| <i>circDEK</i> | miR-129-3p          | 1 |
| <i>circDEK</i> | miR-129-5p          | 1 |
| <i>circDEK</i> | miR-1294            | 3 |
| <i>circDEK</i> | miR-1295b-5p/1912   | 1 |
| <i>circDEK</i> | miR-1296-3p         | 1 |
| <i>circDEK</i> | miR-1298-5p         | 1 |
| <i>circDEK</i> | miR-1299            | 1 |
| <i>circDEK</i> | miR-1302/4298       | 2 |
| <i>circDEK</i> | miR-132-3p/212-3p   | 3 |
| <i>circDEK</i> | miR-1322            | 4 |
| <i>circDEK</i> | miR-1323            | 2 |
| <i>circDEK</i> | miR-134-3p          | 4 |
| <i>circDEK</i> | miR-136-3p          | 2 |
| <i>circDEK</i> | miR-137             | 1 |
| <i>circDEK</i> | miR-139-3p          | 1 |



|                |                                      |    |
|----------------|--------------------------------------|----|
| <i>circDEK</i> | miR-139-5p                           | 2  |
| <i>circDEK</i> | miR-141-5p                           | 1  |
| <i>circDEK</i> | miR-142-3p.1                         | 2  |
| <i>circDEK</i> | miR-143-5p                           | 1  |
| <i>circDEK</i> | miR-144-5p                           | 1  |
| <i>circDEK</i> | miR-146-5p                           | 1  |
| <i>circDEK</i> | miR-1468-3p                          | 1  |
| <i>circDEK</i> | miR-146a-3p                          | 6  |
| <i>circDEK</i> | miR-146b-3p                          | 1  |
| <i>circDEK</i> | miR-1470                             | 1  |
| <i>circDEK</i> | miR-147a                             | 1  |
| <i>circDEK</i> | miR-148-3p/152-3p                    | 2  |
| <i>circDEK</i> | miR-148b-5p/6874-3p                  | 1  |
| <i>circDEK</i> | miR-149-5p                           | 1  |
| <i>circDEK</i> | miR-15-5p/16-5p/195-5p/424-5p/497-5p | 2  |
| <i>circDEK</i> | miR-152-5p                           | 2  |
| <i>circDEK</i> | miR-1537-3p                          | 2  |
| <i>circDEK</i> | miR-154-3p/487-3p                    | 1  |
| <i>circDEK</i> | miR-155-5p                           | 2  |
| <i>circDEK</i> | miR-15b-3p                           | 2  |
| <i>circDEK</i> | miR-16-2-3p/195-3p                   | 4  |
| <i>circDEK</i> | miR-17-3p                            | 1  |
| <i>circDEK</i> | miR-17-5p/20-5p/93-5p/106-5p/519-3p  | 7  |
| <i>circDEK</i> | miR-1825                             | 2  |
| <i>circDEK</i> | miR-183-3p                           | 2  |
| <i>circDEK</i> | miR-183-5p.1                         | 1  |
| <i>circDEK</i> | miR-185-5p                           | 2  |
| <i>circDEK</i> | miR-186-5p                           | 14 |
| <i>circDEK</i> | miR-188-5p                           | 1  |
| <i>circDEK</i> | miR-190a-3p                          | 4  |
| <i>circDEK</i> | miR-191-5p                           | 1  |
| <i>circDEK</i> | miR-1910-3p/6511a-5p                 | 1  |
| <i>circDEK</i> | miR-1911-3p                          | 2  |
| <i>circDEK</i> | miR-192-3p                           | 2  |
| <i>circDEK</i> | miR-193-3p                           | 2  |
| <i>circDEK</i> | miR-194-3p                           | 4  |
| <i>circDEK</i> | miR-196-5p                           | 1  |
| <i>circDEK</i> | miR-196b-3p                          | 2  |

|                |                                              |   |
|----------------|----------------------------------------------|---|
| <i>circDEK</i> | miR-1972                                     | 2 |
| <i>circDEK</i> | miR-199-5p                                   | 2 |
| <i>circDEK</i> | miR-200ab-5p                                 | 1 |
| <i>circDEK</i> | miR-202-3p                                   | 1 |
| <i>circDEK</i> | miR-203a-3p.1                                | 6 |
| <i>circDEK</i> | miR-203b-3p                                  | 4 |
| <i>circDEK</i> | miR-204-5p/211-5p                            | 1 |
| <i>circDEK</i> | miR-205-5p                                   | 1 |
| <i>circDEK</i> | miR-2053                                     | 4 |
| <i>circDEK</i> | miR-211-3p                                   | 1 |
| <i>circDEK</i> | miR-2110                                     | 1 |
| <i>circDEK</i> | miR-2113                                     | 1 |
| <i>circDEK</i> | miR-2116-5p                                  | 2 |
| <i>circDEK</i> | miR-215-3p                                   | 2 |
| <i>circDEK</i> | miR-217                                      | 1 |
| <i>circDEK</i> | miR-22-5p                                    | 2 |
| <i>circDEK</i> | miR-221-3p/222-3p                            | 1 |
| <i>circDEK</i> | miR-223-3p                                   | 3 |
| <i>circDEK</i> | miR-224-5p                                   | 1 |
| <i>circDEK</i> | miR-2277-3p                                  | 2 |
| <i>circDEK</i> | miR-2278                                     | 2 |
| <i>circDEK</i> | miR-24-5p                                    | 1 |
| <i>circDEK</i> | miR-2467-3p                                  | 1 |
| <i>circDEK</i> | miR-25-3p/32-5p/92-3p/363-3p/367-3p          | 1 |
| <i>circDEK</i> | miR-29-3p                                    | 2 |
| <i>circDEK</i> | miR-298                                      | 1 |
| <i>circDEK</i> | miR-299-3p                                   | 3 |
| <i>circDEK</i> | miR-29a-5p                                   | 2 |
| <i>circDEK</i> | miR-29b-1-5p                                 | 1 |
| <i>circDEK</i> | miR-30-5p                                    | 1 |
| <i>circDEK</i> | miR-302-3p/372-3p/373-3p/520-3p              | 2 |
| <i>circDEK</i> | miR-302a-5p                                  | 1 |
| <i>circDEK</i> | miR-302b-5p/302d-5p                          | 3 |
| <i>circDEK</i> | miR-302c-3p.2/520-3p                         | 2 |
| <i>circDEK</i> | miR-3065-3p                                  | 2 |
| <i>circDEK</i> | miR-30b-3p/1273h-5p/3689-3p/6779-5p/6780a-5p |   |
| <i>circDEK</i> | miR-30c-3p/6788-5p                           | 1 |
| <i>circDEK</i> | miR-31-5p                                    | 3 |

|                |                          |    |
|----------------|--------------------------|----|
| <i>circDEK</i> | miR-3119                 | 3  |
| <i>circDEK</i> | miR-3121-3p              | 3  |
| <i>circDEK</i> | miR-3122/3913-5p         | 1  |
| <i>circDEK</i> | miR-3123                 | 5  |
| <i>circDEK</i> | miR-3124-3p              | 3  |
| <i>circDEK</i> | miR-3125/3916/6859-5p    | 5  |
| <i>circDEK</i> | miR-3126-5p              | 2  |
| <i>circDEK</i> | miR-3128                 | 1  |
| <i>circDEK</i> | miR-3129-3p/5583-5p      | 1  |
| <i>circDEK</i> | miR-3130-5p/4482-5p      | 1  |
| <i>circDEK</i> | miR-3133                 | 14 |
| <i>circDEK</i> | miR-3140-5p              | 2  |
| <i>circDEK</i> | miR-3143                 | 1  |
| <i>circDEK</i> | miR-3148                 | 2  |
| <i>circDEK</i> | miR-3150a-3p             | 1  |
| <i>circDEK</i> | miR-3150b-3p             | 2  |
| <i>circDEK</i> | miR-3153/6733-5p/6739-5p | 3  |
| <i>circDEK</i> | miR-3154                 | 3  |
| <i>circDEK</i> | miR-3158-5p              | 1  |
| <i>circDEK</i> | miR-3160-5p              | 3  |
| <i>circDEK</i> | miR-3162-3p              | 2  |
| <i>circDEK</i> | miR-3163                 | 3  |
| <i>circDEK</i> | miR-3168                 | 1  |
| <i>circDEK</i> | miR-3173-5p              | 1  |
| <i>circDEK</i> | miR-3174                 | 2  |
| <i>circDEK</i> | miR-3175                 | 1  |
| <i>circDEK</i> | miR-3176/3922-3p         | 2  |
| <i>circDEK</i> | miR-3182                 | 2  |
| <i>circDEK</i> | miR-3184-3p              | 1  |
| <i>circDEK</i> | miR-3185                 | 12 |
| <i>circDEK</i> | miR-3186-5p              | 1  |
| <i>circDEK</i> | miR-3187-3p              | 2  |
| <i>circDEK</i> | miR-3190-3p              | 2  |
| <i>circDEK</i> | miR-3190-5p              | 2  |
| <i>circDEK</i> | miR-3194-3p              | 1  |
| <i>circDEK</i> | miR-320                  | 2  |
| <i>circDEK</i> | miR-3200-5p              | 1  |
| <i>circDEK</i> | miR-3202                 | 3  |

|                |                           |   |
|----------------|---------------------------|---|
| <i>circDEK</i> | miR-323-3p                | 1 |
| <i>circDEK</i> | miR-323b-3p               | 3 |
| <i>circDEK</i> | miR-324-5p                | 2 |
| <i>circDEK</i> | miR-325                   | 2 |
| <i>circDEK</i> | miR-329-5p                | 3 |
| <i>circDEK</i> | miR-330-3p                | 2 |
| <i>circDEK</i> | miR-330-3p.2              | 2 |
| <i>circDEK</i> | miR-335-5p                | 3 |
| <i>circDEK</i> | miR-337-5p                | 1 |
| <i>circDEK</i> | miR-338-5p                | 2 |
| <i>circDEK</i> | miR-33a-3p                | 5 |
| <i>circDEK</i> | miR-33b-3p/515-3p/519e-3p | 2 |
| <i>circDEK</i> | miR-34-5p/449-5p          | 1 |
| <i>circDEK</i> | miR-340-5p                | 4 |
| <i>circDEK</i> | miR-345-3p                | 2 |
| <i>circDEK</i> | miR-34a-3p                | 1 |
| <i>circDEK</i> | miR-34b-5p/449c-5p        | 1 |
| <i>circDEK</i> | miR-3529-3p               | 2 |
| <i>circDEK</i> | miR-3605-5p               | 6 |
| <i>circDEK</i> | miR-3606-5p               | 6 |
| <i>circDEK</i> | miR-3607-3p               | 2 |
| <i>circDEK</i> | miR-3611                  | 3 |
| <i>circDEK</i> | miR-3613-3p               | 5 |
| <i>circDEK</i> | miR-3613-5p               | 1 |
| <i>circDEK</i> | miR-3614-3p               | 2 |
| <i>circDEK</i> | miR-3617-3p               | 1 |
| <i>circDEK</i> | miR-3622a-5p              | 2 |
| <i>circDEK</i> | miR-3649                  | 1 |
| <i>circDEK</i> | miR-365-3p                | 2 |
| <i>circDEK</i> | miR-3651                  | 1 |
| <i>circDEK</i> | miR-3653-3p               | 4 |
| <i>circDEK</i> | miR-3657                  | 5 |
| <i>circDEK</i> | miR-3658                  | 2 |
| <i>circDEK</i> | miR-3674                  | 1 |
| <i>circDEK</i> | miR-3677-3p               | 2 |
| <i>circDEK</i> | miR-3677-5p               | 3 |
| <i>circDEK</i> | miR-3678-3p               | 1 |
| <i>circDEK</i> | miR-3680-3p               | 2 |

|                |                     |   |
|----------------|---------------------|---|
| <i>circDEK</i> | miR-3682-3p         | 4 |
| <i>circDEK</i> | miR-3682-5p         | 2 |
| <i>circDEK</i> | miR-3692-5p         | 2 |
| <i>circDEK</i> | miR-370-3p          | 1 |
| <i>circDEK</i> | miR-3714            | 3 |
| <i>circDEK</i> | miR-371a-3p         | 2 |
| <i>circDEK</i> | miR-371b-3p         | 2 |
| <i>circDEK</i> | miR-374-5p/655-3p   | 1 |
| <i>circDEK</i> | miR-376-3p          | 1 |
| <i>circDEK</i> | miR-376c-3p         | 1 |
| <i>circDEK</i> | miR-377-5p/6086     | 3 |
| <i>circDEK</i> | miR-378a-5p         | 1 |
| <i>circDEK</i> | miR-380-5p/563      | 2 |
| <i>circDEK</i> | miR-382-5p          | 2 |
| <i>circDEK</i> | miR-383-3p          | 2 |
| <i>circDEK</i> | miR-383-5p.1        | 2 |
| <i>circDEK</i> | miR-383-5p.2        | 2 |
| <i>circDEK</i> | miR-3909            | 2 |
| <i>circDEK</i> | miR-3910            | 3 |
| <i>circDEK</i> | miR-3911            | 1 |
| <i>circDEK</i> | miR-3912-5p         | 3 |
| <i>circDEK</i> | miR-3914            | 1 |
| <i>circDEK</i> | miR-3915            | 3 |
| <i>circDEK</i> | miR-3919            | 3 |
| <i>circDEK</i> | miR-3923            | 2 |
| <i>circDEK</i> | miR-3925-5p         | 5 |
| <i>circDEK</i> | miR-3927-3p/6831-5p | 1 |
| <i>circDEK</i> | miR-3934-5p         | 2 |
| <i>circDEK</i> | miR-3936            | 1 |
| <i>circDEK</i> | miR-3937            | 1 |
| <i>circDEK</i> | miR-3941            | 2 |
| <i>circDEK</i> | miR-3942-3p         | 5 |
| <i>circDEK</i> | miR-3973            | 1 |
| <i>circDEK</i> | miR-3976            | 2 |
| <i>circDEK</i> | miR-409-3p          | 4 |
| <i>circDEK</i> | miR-410-3p          | 3 |
| <i>circDEK</i> | miR-411-3p          | 1 |
| <i>circDEK</i> | miR-411-5p.1        | 2 |

|                |                                    |    |
|----------------|------------------------------------|----|
| <i>circDEK</i> | miR-411-5p.2                       | 2  |
| <i>circDEK</i> | miR-4260                           | 1  |
| <i>circDEK</i> | miR-4261                           | 2  |
| <i>circDEK</i> | miR-4263                           | 4  |
| <i>circDEK</i> | miR-4265/4296/4322                 | 4  |
| <i>circDEK</i> | miR-4269/6715b-5p                  | 2  |
| <i>circDEK</i> | miR-4276                           | 3  |
| <i>circDEK</i> | miR-4277                           | 6  |
| <i>circDEK</i> | miR-4282                           | 1  |
| <i>circDEK</i> | miR-4291                           | 1  |
| <i>circDEK</i> | miR-4293                           | 1  |
| <i>circDEK</i> | miR-4297/5581-5p                   | 2  |
| <i>circDEK</i> | miR-4303                           | 2  |
| <i>circDEK</i> | miR-4307                           | 1  |
| <i>circDEK</i> | miR-4311                           | 6  |
| <i>circDEK</i> | miR-4316                           | 3  |
| <i>circDEK</i> | miR-4317                           | 2  |
| <i>circDEK</i> | miR-432-5p                         | 1  |
| <i>circDEK</i> | miR-4419a/4510/6127/6129/6130/6133 | 2  |
| <i>circDEK</i> | miR-4422                           | 2  |
| <i>circDEK</i> | miR-4424                           | 2  |
| <i>circDEK</i> | miR-4426/4647/4662b                | 2  |
| <i>circDEK</i> | miR-4434/4516/5703                 | 2  |
| <i>circDEK</i> | miR-4435                           | 2  |
| <i>circDEK</i> | miR-4438                           | 3  |
| <i>circDEK</i> | miR-4450                           | 1  |
| <i>circDEK</i> | miR-4452                           | 2  |
| <i>circDEK</i> | miR-4461                           | 1  |
| <i>circDEK</i> | miR-4470                           | 1  |
| <i>circDEK</i> | miR-4476/6876-5p                   | 10 |
| <i>circDEK</i> | miR-4477a                          | 1  |
| <i>circDEK</i> | miR-4484                           | 1  |
| <i>circDEK</i> | miR-4491/4657                      | 3  |
| <i>circDEK</i> | miR-4493                           | 3  |
| <i>circDEK</i> | miR-4496                           | 2  |
| <i>circDEK</i> | miR-4504                           | 1  |
| <i>circDEK</i> | miR-450a-1-3p                      | 1  |
| <i>circDEK</i> | miR-450a-2-3p                      | 1  |

|                |                       |   |
|----------------|-----------------------|---|
| <i>circDEK</i> | miR-450b-5p           | 2 |
| <i>circDEK</i> | miR-4514/4692         | 2 |
| <i>circDEK</i> | miR-4517              | 1 |
| <i>circDEK</i> | miR-452-3p            | 1 |
| <i>circDEK</i> | miR-4524-5p           | 2 |
| <i>circDEK</i> | miR-4524a-3p          | 1 |
| <i>circDEK</i> | miR-4524b-3p          | 3 |
| <i>circDEK</i> | miR-4531              | 3 |
| <i>circDEK</i> | miR-4533              | 3 |
| <i>circDEK</i> | miR-455-3p.2          | 1 |
| <i>circDEK</i> | miR-4635              | 2 |
| <i>circDEK</i> | miR-4639-5p           | 1 |
| <i>circDEK</i> | miR-4640-3p           | 2 |
| <i>circDEK</i> | miR-4645-5p/4673      | 2 |
| <i>circDEK</i> | miR-4648              | 2 |
| <i>circDEK</i> | miR-4649-3p           | 2 |
| <i>circDEK</i> | miR-4650-5p           | 2 |
| <i>circDEK</i> | miR-4652-3p           | 2 |
| <i>circDEK</i> | miR-4654/4769-5p      | 2 |
| <i>circDEK</i> | miR-4659a-5p/4659b-5p | 2 |
| <i>circDEK</i> | miR-466               | 1 |
| <i>circDEK</i> | miR-4661-3p           | 2 |
| <i>circDEK</i> | miR-4662a-3p          | 3 |
| <i>circDEK</i> | miR-4667-3p           | 1 |
| <i>circDEK</i> | miR-4668-3p           | 2 |
| <i>circDEK</i> | miR-4668-5p           | 3 |
| <i>circDEK</i> | miR-4669              | 5 |
| <i>circDEK</i> | miR-4672              | 2 |
| <i>circDEK</i> | miR-4677-3p           | 6 |
| <i>circDEK</i> | miR-4678              | 1 |
| <i>circDEK</i> | miR-4679              | 6 |
| <i>circDEK</i> | miR-4683              | 1 |
| <i>circDEK</i> | miR-4687-5p           | 1 |
| <i>circDEK</i> | miR-4688/6743-5p      | 1 |
| <i>circDEK</i> | miR-4689/6858-5p      | 3 |
| <i>circDEK</i> | miR-4691-3p           | 2 |
| <i>circDEK</i> | miR-4695-5p           | 1 |
| <i>circDEK</i> | miR-4696              | 2 |

|                |                             |    |
|----------------|-----------------------------|----|
| <i>circDEK</i> | miR-4697-3p                 | 3  |
| <i>circDEK</i> | miR-4699-5p                 | 4  |
| <i>circDEK</i> | miR-4700-3p                 | 1  |
| <i>circDEK</i> | miR-4706/4749-5p            | 1  |
| <i>circDEK</i> | miR-4708-3p                 | 1  |
| <i>circDEK</i> | miR-4709-3p                 | 12 |
| <i>circDEK</i> | miR-4709-5p                 | 2  |
| <i>circDEK</i> | miR-4714-3p                 | 1  |
| <i>circDEK</i> | miR-4715-3p                 | 1  |
| <i>circDEK</i> | miR-4716-5p                 | 2  |
| <i>circDEK</i> | miR-4717-5p                 | 2  |
| <i>circDEK</i> | miR-4719                    | 2  |
| <i>circDEK</i> | miR-4720-5p/4799-3p/5588-5p | 1  |
| <i>circDEK</i> | miR-4725-5p                 | 1  |
| <i>circDEK</i> | miR-4727-5p                 | 1  |
| <i>circDEK</i> | miR-4731-3p/4801            | 2  |
| <i>circDEK</i> | miR-4732-5p                 | 2  |
| <i>circDEK</i> | miR-4738-3p                 | 1  |
| <i>circDEK</i> | miR-4742-5p                 | 2  |
| <i>circDEK</i> | miR-4743-3p                 | 2  |
| <i>circDEK</i> | miR-4751                    | 1  |
| <i>circDEK</i> | miR-4753-3p                 | 1  |
| <i>circDEK</i> | miR-4755-3p                 | 2  |
| <i>circDEK</i> | miR-4756-3p                 | 3  |
| <i>circDEK</i> | miR-4760-3p                 | 1  |
| <i>circDEK</i> | miR-4766-3p                 | 1  |
| <i>circDEK</i> | miR-4766-5p                 | 2  |
| <i>circDEK</i> | miR-4769-3p/6817-5p         | 1  |
| <i>circDEK</i> | miR-4772-5p                 | 2  |
| <i>circDEK</i> | miR-4773                    | 1  |
| <i>circDEK</i> | miR-4778-5p                 | 3  |
| <i>circDEK</i> | miR-4779                    | 1  |
| <i>circDEK</i> | miR-4781-3p                 | 4  |
| <i>circDEK</i> | miR-4782-5p/5706            | 1  |
| <i>circDEK</i> | miR-4786-5p                 | 1  |
| <i>circDEK</i> | miR-4790-3p                 | 1  |
| <i>circDEK</i> | miR-4795-5p                 | 4  |
| <i>circDEK</i> | miR-4796-3p                 | 3  |



|                |                          |   |
|----------------|--------------------------|---|
| <i>circDEK</i> | miR-4797-5p              | 2 |
| <i>circDEK</i> | miR-4799-5p              | 4 |
| <i>circDEK</i> | miR-486-3p               | 1 |
| <i>circDEK</i> | miR-493-3p               | 1 |
| <i>circDEK</i> | miR-493-5p               | 1 |
| <i>circDEK</i> | miR-494-3p               | 4 |
| <i>circDEK</i> | miR-495-5p               | 2 |
| <i>circDEK</i> | miR-498                  | 1 |
| <i>circDEK</i> | miR-5000-5p              | 5 |
| <i>circDEK</i> | miR-5001-3p              | 1 |
| <i>circDEK</i> | miR-5002-5p              | 2 |
| <i>circDEK</i> | miR-5004-5p              | 1 |
| <i>circDEK</i> | miR-5007-3p              | 1 |
| <i>circDEK</i> | miR-5007-5p              | 4 |
| <i>circDEK</i> | miR-5009-3p              | 2 |
| <i>circDEK</i> | miR-5010-3p              | 1 |
| <i>circDEK</i> | miR-5011-5p              | 5 |
| <i>circDEK</i> | miR-503-5p               | 2 |
| <i>circDEK</i> | miR-504-3p               | 2 |
| <i>circDEK</i> | miR-506-5p               | 1 |
| <i>circDEK</i> | miR-507/557              | 2 |
| <i>circDEK</i> | miR-5089-3p              | 1 |
| <i>circDEK</i> | miR-509-3-5p/509-5p/4418 | 1 |
| <i>circDEK</i> | miR-5093                 | 1 |
| <i>circDEK</i> | miR-5095/7151-3p         | 1 |
| <i>circDEK</i> | miR-510-3p               | 6 |
| <i>circDEK</i> | miR-5100                 | 7 |
| <i>circDEK</i> | miR-512-3p               | 2 |
| <i>circDEK</i> | miR-513b-3p              | 1 |
| <i>circDEK</i> | miR-513b-5p              | 1 |
| <i>circDEK</i> | miR-514a-3p              | 1 |
| <i>circDEK</i> | miR-516b-5p              | 1 |
| <i>circDEK</i> | miR-5186                 | 1 |
| <i>circDEK</i> | miR-5187-5p              | 1 |
| <i>circDEK</i> | miR-518a-5p/527          | 1 |
| <i>circDEK</i> | miR-519-3p               | 2 |
| <i>circDEK</i> | miR-5191                 | 2 |
| <i>circDEK</i> | miR-5192                 | 2 |

|                |                                                                    |   |
|----------------|--------------------------------------------------------------------|---|
| <i>circDEK</i> | miR-5193                                                           | 1 |
| <i>circDEK</i> | miR-5197-3p                                                        | 6 |
| <i>circDEK</i> | miR-5197-5p                                                        | 1 |
| <i>circDEK</i> | miR-520g-3p                                                        | 1 |
| <i>circDEK</i> | miR-526b-5p                                                        | 4 |
| <i>circDEK</i> | miR-539-5p                                                         | 4 |
| <i>circDEK</i> | miR-542-3p                                                         | 1 |
| <i>circDEK</i> | miR-543                                                            | 2 |
| <i>circDEK</i> | miR-544a                                                           | 2 |
| <i>circDEK</i> | miR-545-5p                                                         | 1 |
| <i>circDEK</i> | miR-548ac/548bb-3p/548d-3p/548h-3p/548z                            | 1 |
| <i>circDEK</i> | miR-548ah-5p/3609                                                  | 7 |
| <i>circDEK</i> | miR-548ai/548ag/548ba/570-5p                                       | 2 |
| <i>circDEK</i> | miR-548aj-5p/548f-5p/548g-5p/548x-5p                               | 1 |
| <i>circDEK</i> | miR-548an                                                          | 1 |
| <i>circDEK</i> | miR-548ao-5p/548ax                                                 | 1 |
| <i>circDEK</i> | miR-548ap-3p/548aa/548t-3p                                         | 5 |
| <i>circDEK</i> | miR-548aq-3p/548am-3p/548aj-3p/548ah-3p/548ae-3p/548j-3p/548x-3p   | 1 |
| <i>circDEK</i> | miR-548as-3p                                                       | 5 |
| <i>circDEK</i> | miR-548at-5p                                                       | 2 |
| <i>circDEK</i> | miR-548au-3p                                                       | 1 |
| <i>circDEK</i> | miR-548av-3p                                                       | 3 |
| <i>circDEK</i> | miR-548av-5p/548k/8054                                             | 4 |
| <i>circDEK</i> | miR-548aw                                                          | 1 |
| <i>circDEK</i> | miR-548ay-3p/548at-3p                                              | 5 |
| <i>circDEK</i> | miR-548ay-5p/548au-5p/548as-5p/548ar-5p/548aq-5p/548ap-5p/548am-5p | 1 |
| <i>circDEK</i> | miR-548az-3p/548ar-3p/548a-3p/548e-3p/548f-3p                      | 1 |
| <i>circDEK</i> | miR-548az-5p/548t-5p                                               | 9 |
| <i>circDEK</i> | miR-548c-3p                                                        | 3 |
| <i>circDEK</i> | miR-548e-5p                                                        | 1 |
| <i>circDEK</i> | miR-548g-3p                                                        | 5 |
| <i>circDEK</i> | miR-548l                                                           | 4 |
| <i>circDEK</i> | miR-548m                                                           | 1 |
| <i>circDEK</i> | miR-548n                                                           | 9 |
| <i>circDEK</i> | miR-548p                                                           | 1 |
| <i>circDEK</i> | miR-548s                                                           | 2 |
| <i>circDEK</i> | miR-548u/7161-5p                                                   | 2 |
| <i>circDEK</i> | miR-548v                                                           | 1 |

|                |             |   |
|----------------|-------------|---|
| <i>circDEK</i> | miR-551b-5p | 1 |
| <i>circDEK</i> | miR-552-3p  | 2 |
| <i>circDEK</i> | miR-552-5p  | 1 |
| <i>circDEK</i> | miR-5571-5p | 3 |
| <i>circDEK</i> | miR-5572    | 1 |
| <i>circDEK</i> | miR-5582-3p | 1 |
| <i>circDEK</i> | miR-5582-5p | 2 |
| <i>circDEK</i> | miR-5583-3p | 1 |
| <i>circDEK</i> | miR-5584-3p | 1 |
| <i>circDEK</i> | miR-5584-5p | 2 |
| <i>circDEK</i> | miR-5585-3p | 1 |
| <i>circDEK</i> | miR-5585-5p | 1 |
| <i>circDEK</i> | miR-5590-5p | 2 |
| <i>circDEK</i> | miR-561-3p  | 2 |
| <i>circDEK</i> | miR-562     | 2 |
| <i>circDEK</i> | miR-567     | 1 |
| <i>circDEK</i> | miR-5680    | 9 |
| <i>circDEK</i> | miR-5681a   | 1 |
| <i>circDEK</i> | miR-5683    | 3 |
| <i>circDEK</i> | miR-5692a   | 2 |
| <i>circDEK</i> | miR-5693    | 4 |
| <i>circDEK</i> | miR-5694    | 2 |
| <i>circDEK</i> | miR-570-3p  | 2 |
| <i>circDEK</i> | miR-5700    | 3 |
| <i>circDEK</i> | miR-576-5p  | 4 |
| <i>circDEK</i> | miR-577     | 2 |
| <i>circDEK</i> | miR-578     | 2 |
| <i>circDEK</i> | miR-583     | 6 |
| <i>circDEK</i> | miR-584-3p  | 2 |
| <i>circDEK</i> | miR-586     | 2 |
| <i>circDEK</i> | miR-587     | 3 |
| <i>circDEK</i> | miR-588     | 2 |
| <i>circDEK</i> | miR-589-5p  | 1 |
| <i>circDEK</i> | miR-593-3p  | 1 |
| <i>circDEK</i> | miR-595     | 5 |
| <i>circDEK</i> | miR-596     | 1 |
| <i>circDEK</i> | miR-597-3p  | 2 |
| <i>circDEK</i> | miR-605-3p  | 3 |

|                |                  |    |
|----------------|------------------|----|
| <i>circDEK</i> | miR-6071         | 1  |
| <i>circDEK</i> | miR-6072/6891-3p | 2  |
| <i>circDEK</i> | miR-6073         | 2  |
| <i>circDEK</i> | miR-6074         | 1  |
| <i>circDEK</i> | miR-6077         | 6  |
| <i>circDEK</i> | miR-6079         | 3  |
| <i>circDEK</i> | miR-6080         | 2  |
| <i>circDEK</i> | miR-6085/6813-5p | 1  |
| <i>circDEK</i> | miR-6124         | 2  |
| <i>circDEK</i> | miR-6126         | 1  |
| <i>circDEK</i> | miR-6128         | 1  |
| <i>circDEK</i> | miR-622          | 1  |
| <i>circDEK</i> | miR-623          | 1  |
| <i>circDEK</i> | miR-624-3p       | 2  |
| <i>circDEK</i> | miR-627-5p       | 2  |
| <i>circDEK</i> | miR-628-3p       | 2  |
| <i>circDEK</i> | miR-635/6774-5p  | 2  |
| <i>circDEK</i> | miR-641/3617-5p  | 2  |
| <i>circDEK</i> | miR-643          | 1  |
| <i>circDEK</i> | miR-644a         | 1  |
| <i>circDEK</i> | miR-646          | 2  |
| <i>circDEK</i> | miR-648          | 1  |
| <i>circDEK</i> | miR-6499-3p      | 1  |
| <i>circDEK</i> | miR-6505-5p      | 1  |
| <i>circDEK</i> | miR-6507-5p      | 5  |
| <i>circDEK</i> | miR-651-3p       | 12 |
| <i>circDEK</i> | miR-6513-5p      | 1  |
| <i>circDEK</i> | miR-6515-3p      | 1  |
| <i>circDEK</i> | miR-6516-3p      | 1  |
| <i>circDEK</i> | miR-6516-5p      | 1  |
| <i>circDEK</i> | miR-653-5p       | 1  |
| <i>circDEK</i> | miR-655-5p       | 3  |
| <i>circDEK</i> | miR-656-3p       | 1  |
| <i>circDEK</i> | miR-660-3p       | 1  |
| <i>circDEK</i> | miR-664a-3p      | 3  |
| <i>circDEK</i> | miR-664a-5p/4794 | 1  |
| <i>circDEK</i> | miR-6721-5p      | 1  |
| <i>circDEK</i> | miR-6730-5p      | 1  |

|                |                     |    |
|----------------|---------------------|----|
| <i>circDEK</i> | miR-6731-5p/8085    | 2  |
| <i>circDEK</i> | miR-6738-3p         | 2  |
| <i>circDEK</i> | miR-6740-3p         | 2  |
| <i>circDEK</i> | miR-6748-5p         | 3  |
| <i>circDEK</i> | miR-6750-5p/6822-5p | 2  |
| <i>circDEK</i> | miR-6752-3p         | 1  |
| <i>circDEK</i> | miR-6758-3p         | 2  |
| <i>circDEK</i> | miR-6758-5p/6856-5p | 10 |
| <i>circDEK</i> | miR-6759-5p         | 4  |
| <i>circDEK</i> | miR-676-3p          | 3  |
| <i>circDEK</i> | miR-676-5p          | 2  |
| <i>circDEK</i> | miR-6768-3p         | 1  |
| <i>circDEK</i> | miR-6770-5p         | 1  |
| <i>circDEK</i> | miR-6771-3p         | 2  |
| <i>circDEK</i> | miR-6773-3p         | 2  |
| <i>circDEK</i> | miR-6776-3p         | 1  |
| <i>circDEK</i> | miR-6777-5p/6889-5p | 1  |
| <i>circDEK</i> | miR-6779-3p         | 1  |
| <i>circDEK</i> | miR-6782-3p         | 3  |
| <i>circDEK</i> | miR-6793-5p         | 3  |
| <i>circDEK</i> | miR-6796-5p         | 4  |
| <i>circDEK</i> | miR-6801-5p         | 3  |
| <i>circDEK</i> | miR-6808-3p         | 1  |
| <i>circDEK</i> | miR-6809-5p         | 3  |
| <i>circDEK</i> | miR-6810-5p         | 1  |
| <i>circDEK</i> | miR-6818-5p         | 1  |
| <i>circDEK</i> | miR-6822-3p         | 1  |
| <i>circDEK</i> | miR-6825-5p         | 1  |
| <i>circDEK</i> | miR-6827-5p         | 1  |
| <i>circDEK</i> | miR-6828-3p         | 1  |
| <i>circDEK</i> | miR-6830-3p         | 1  |
| <i>circDEK</i> | miR-6830-5p         | 3  |
| <i>circDEK</i> | miR-6832-5p         | 2  |
| <i>circDEK</i> | miR-6834-3p         | 1  |
| <i>circDEK</i> | miR-6856-3p         | 2  |
| <i>circDEK</i> | miR-6857-5p         | 1  |
| <i>circDEK</i> | miR-6864-5p         | 1  |
| <i>circDEK</i> | miR-6867-5p         | 1  |

|                |              |   |
|----------------|--------------|---|
| <i>circDEK</i> | miR-6868-3p  | 1 |
| <i>circDEK</i> | miR-6868-5p  | 1 |
| <i>circDEK</i> | miR-6870-3p  | 2 |
| <i>circDEK</i> | miR-6871-3p  | 2 |
| <i>circDEK</i> | miR-6871-5p  | 1 |
| <i>circDEK</i> | miR-6873-5p  | 2 |
| <i>circDEK</i> | miR-6878-5p  | 2 |
| <i>circDEK</i> | miR-6882-3p  | 1 |
| <i>circDEK</i> | miR-6888-3p  | 2 |
| <i>circDEK</i> | miR-6888-5p  | 1 |
| <i>circDEK</i> | miR-6894-5p  | 1 |
| <i>circDEK</i> | miR-6895-3p  | 1 |
| <i>circDEK</i> | miR-7-3p     | 2 |
| <i>circDEK</i> | miR-7-5p     | 6 |
| <i>circDEK</i> | miR-708-3p   | 2 |
| <i>circDEK</i> | miR-7109-3p  | 2 |
| <i>circDEK</i> | miR-711      | 1 |
| <i>circDEK</i> | miR-7154-3p  | 1 |
| <i>circDEK</i> | miR-7158-3p  | 4 |
| <i>circDEK</i> | miR-7162-3p  | 2 |
| <i>circDEK</i> | miR-744-5p   | 1 |
| <i>circDEK</i> | miR-758-3p   | 1 |
| <i>circDEK</i> | miR-758-5p   | 2 |
| <i>circDEK</i> | miR-760      | 1 |
| <i>circDEK</i> | miR-765      | 1 |
| <i>circDEK</i> | miR-766-5p   | 1 |
| <i>circDEK</i> | miR-767-5p   | 2 |
| <i>circDEK</i> | miR-769-5p   | 1 |
| <i>circDEK</i> | miR-770-5p   | 2 |
| <i>circDEK</i> | miR-7850-5p  | 3 |
| <i>circDEK</i> | miR-7856-5p  | 1 |
| <i>circDEK</i> | miR-7976     | 1 |
| <i>circDEK</i> | miR-802      | 1 |
| <i>circDEK</i> | miR-8057     | 1 |
| <i>circDEK</i> | miR-8060     | 1 |
| <i>circDEK</i> | miR-8062     | 3 |
| <i>circDEK</i> | miR-8066     | 3 |
| <i>circDEK</i> | miR-873-5p.1 | 1 |

|                 |                         |   |
|-----------------|-------------------------|---|
| <i>circDEK</i>  | miR-875-3p              | 1 |
| <i>circDEK</i>  | miR-877-3p              | 2 |
| <i>circDEK</i>  | miR-887-5p              | 1 |
| <i>circDEK</i>  | miR-889-3p              | 2 |
| <i>circDEK</i>  | miR-890                 | 1 |
| <i>circDEK</i>  | miR-891b                | 1 |
| <i>circDEK</i>  | miR-892-5p              | 1 |
| <i>circDEK</i>  | miR-892b                | 1 |
| <i>circDEK</i>  | miR-921                 | 6 |
| <i>circDEK</i>  | miR-924                 | 6 |
| <i>circDEK</i>  | miR-93-3p               | 2 |
| <i>circDEK</i>  | miR-937-5p              | 2 |
| <i>circDEK</i>  | miR-939-5p/1343-5p      | 1 |
| <i>circDEK</i>  | miR-940/6808-5p/6893-5p | 1 |
| <i>circDEK</i>  | miR-944                 | 1 |
| <i>circDEK</i>  | miR-95-5p               | 2 |
| <i>circDEK</i>  | miR-9500                | 2 |
| <i>circDGKB</i> | miR-101-3p.1            | 2 |
| <i>circDGKB</i> | miR-101-3p.2            | 2 |
| <i>circDGKB</i> | miR-103-3p/107          | 1 |
| <i>circDGKB</i> | miR-103a-2-5p           | 1 |
| <i>circDGKB</i> | miR-1178-5p             | 1 |
| <i>circDGKB</i> | miR-1180-5p             | 1 |
| <i>circDGKB</i> | miR-1182                | 1 |
| <i>circDGKB</i> | miR-1183                | 3 |
| <i>circDGKB</i> | miR-1184                | 2 |
| <i>circDGKB</i> | miR-1185-5p             | 2 |
| <i>circDGKB</i> | miR-1199-5p/6751-3p     | 1 |
| <i>circDGKB</i> | miR-1200                | 4 |
| <i>circDGKB</i> | miR-1202/3972           | 1 |
| <i>circDGKB</i> | miR-1205                | 2 |
| <i>circDGKB</i> | miR-1224-5p             | 2 |
| <i>circDGKB</i> | miR-1244                | 1 |
| <i>circDGKB</i> | miR-1245a/8079          | 2 |
| <i>circDGKB</i> | miR-1245b-5p            | 2 |
| <i>circDGKB</i> | miR-1252-5p             | 4 |
| <i>circDGKB</i> | miR-1254/3116           | 1 |
| <i>circDGKB</i> | miR-125a-3p             | 1 |

|                 |                                      |   |
|-----------------|--------------------------------------|---|
| <i>circDGKB</i> | miR-1263                             | 2 |
| <i>circDGKB</i> | miR-1265                             | 1 |
| <i>circDGKB</i> | miR-1269                             | 1 |
| <i>circDGKB</i> | miR-1270                             | 1 |
| <i>circDGKB</i> | miR-1273f                            | 1 |
| <i>circDGKB</i> | miR-1273g-5p                         | 2 |
| <i>circDGKB</i> | miR-1276                             | 6 |
| <i>circDGKB</i> | miR-1279                             | 3 |
| <i>circDGKB</i> | miR-1287-3p                          | 1 |
| <i>circDGKB</i> | miR-1288-3p                          | 1 |
| <i>circDGKB</i> | miR-129-5p                           | 1 |
| <i>circDGKB</i> | miR-1295b-5p/1912                    | 2 |
| <i>circDGKB</i> | miR-1299                             | 3 |
| <i>circDGKB</i> | miR-1301-3p                          | 1 |
| <i>circDGKB</i> | miR-1301-5p/6502-5p                  | 1 |
| <i>circDGKB</i> | miR-1302/4298                        | 1 |
| <i>circDGKB</i> | miR-130b-5p                          | 1 |
| <i>circDGKB</i> | miR-132-3p/212-3p                    | 3 |
| <i>circDGKB</i> | miR-132-5p                           | 1 |
| <i>circDGKB</i> | miR-134-5p                           | 1 |
| <i>circDGKB</i> | miR-135b-3p                          | 2 |
| <i>circDGKB</i> | miR-136-5p                           | 3 |
| <i>circDGKB</i> | miR-139-3p                           | 1 |
| <i>circDGKB</i> | miR-140-5p                           | 2 |
| <i>circDGKB</i> | miR-143-3p                           | 1 |
| <i>circDGKB</i> | miR-144-3p                           | 2 |
| <i>circDGKB</i> | miR-145-3p                           | 8 |
| <i>circDGKB</i> | miR-145-5p                           | 3 |
| <i>circDGKB</i> | miR-146-5p                           | 1 |
| <i>circDGKB</i> | miR-1468-3p                          | 1 |
| <i>circDGKB</i> | miR-148-3p/152-3p                    | 1 |
| <i>circDGKB</i> | miR-149-3p/4728-5p/6785-5p/6883-5p   | 1 |
| <i>circDGKB</i> | miR-15-5p/16-5p/195-5p/424-5p/497-5p | 2 |
| <i>circDGKB</i> | miR-150-3p                           | 2 |
| <i>circDGKB</i> | miR-151-3p                           | 1 |
| <i>circDGKB</i> | miR-153-3p                           | 3 |
| <i>circDGKB</i> | miR-153-5p                           | 3 |
| <i>circDGKB</i> | miR-1539                             | 1 |



|                 |                                     |   |
|-----------------|-------------------------------------|---|
| <i>circDGKB</i> | miR-154-5p                          | 2 |
| <i>circDGKB</i> | miR-1587/3620-5p                    | 2 |
| <i>circDGKB</i> | miR-16-1-3p                         | 2 |
| <i>circDGKB</i> | miR-17-3p                           | 2 |
| <i>circDGKB</i> | miR-17-5p/20-5p/93-5p/106-5p/519-3p | 3 |
| <i>circDGKB</i> | miR-18-5p                           | 2 |
| <i>circDGKB</i> | miR-181-5p                          | 4 |
| <i>circDGKB</i> | miR-182-3p                          | 2 |
| <i>circDGKB</i> | miR-182-5p                          | 1 |
| <i>circDGKB</i> | miR-1825                            | 1 |
| <i>circDGKB</i> | miR-18a-3p                          | 3 |
| <i>circDGKB</i> | miR-19-5p                           | 1 |
| <i>circDGKB</i> | miR-191-5p                          | 1 |
| <i>circDGKB</i> | miR-1914-5p                         | 2 |
| <i>circDGKB</i> | miR-193-3p                          | 1 |
| <i>circDGKB</i> | miR-193b-5p                         | 1 |
| <i>circDGKB</i> | miR-194-5p                          | 1 |
| <i>circDGKB</i> | miR-1976                            | 5 |
| <i>circDGKB</i> | miR-199-3p                          | 1 |
| <i>circDGKB</i> | miR-199-5p                          | 1 |
| <i>circDGKB</i> | miR-200c-5p/550a-3p                 | 1 |
| <i>circDGKB</i> | miR-202-3p                          | 1 |
| <i>circDGKB</i> | miR-203a-3p.1                       | 3 |
| <i>circDGKB</i> | miR-203a-5p                         | 2 |
| <i>circDGKB</i> | miR-203b-5p/6718-5p                 | 4 |
| <i>circDGKB</i> | miR-2052                            | 1 |
| <i>circDGKB</i> | miR-20a-3p                          | 3 |
| <i>circDGKB</i> | miR-20b-3p                          | 2 |
| <i>circDGKB</i> | miR-21-3p/3591-3p                   | 1 |
| <i>circDGKB</i> | miR-21-5p/590-5p                    | 2 |
| <i>circDGKB</i> | miR-2110                            | 1 |
| <i>circDGKB</i> | miR-2113                            | 1 |
| <i>circDGKB</i> | miR-214-3p/3619-5p                  | 3 |
| <i>circDGKB</i> | miR-214-5p                          | 1 |
| <i>circDGKB</i> | miR-218-1-3p                        | 2 |
| <i>circDGKB</i> | miR-218-2-3p                        | 2 |
| <i>circDGKB</i> | miR-218-5p                          | 3 |
| <i>circDGKB</i> | miR-219b-5p                         | 2 |

|                 |                                     |   |
|-----------------|-------------------------------------|---|
| <i>circDGKB</i> | miR-22-3p                           | 2 |
| <i>circDGKB</i> | miR-223-3p                          | 1 |
| <i>circDGKB</i> | miR-224-5p                          | 1 |
| <i>circDGKB</i> | miR-23-5p                           | 2 |
| <i>circDGKB</i> | miR-25-3p/32-5p/92-3p/363-3p/367-3p | 2 |
| <i>circDGKB</i> | miR-2681-3p                         | 2 |
| <i>circDGKB</i> | miR-2681-5p                         | 1 |
| <i>circDGKB</i> | miR-2682-3p/6781-3p                 | 2 |
| <i>circDGKB</i> | miR-299-5p                          | 1 |
| <i>circDGKB</i> | miR-29a-5p                          | 4 |
| <i>circDGKB</i> | miR-29b-1-5p                        | 1 |
| <i>circDGKB</i> | miR-30-3p                           | 3 |
| <i>circDGKB</i> | miR-3065-3p                         | 1 |
| <i>circDGKB</i> | miR-3065-5p                         | 3 |
| <i>circDGKB</i> | miR-3074-5p                         | 8 |
| <i>circDGKB</i> | miR-31-5p                           | 2 |
| <i>circDGKB</i> | miR-3120-3p                         | 1 |
| <i>circDGKB</i> | miR-3121-5p                         | 2 |
| <i>circDGKB</i> | miR-3122/3913-5p                    | 1 |
| <i>circDGKB</i> | miR-3123                            | 2 |
| <i>circDGKB</i> | miR-3128                            | 1 |
| <i>circDGKB</i> | miR-3130-5p/4482-5p                 | 2 |
| <i>circDGKB</i> | miR-3134                            | 7 |
| <i>circDGKB</i> | miR-3136-5p/4439                    | 1 |
| <i>circDGKB</i> | miR-3137                            | 2 |
| <i>circDGKB</i> | miR-3138                            | 1 |
| <i>circDGKB</i> | miR-3140-5p                         | 2 |
| <i>circDGKB</i> | miR-3143                            | 1 |
| <i>circDGKB</i> | miR-3148                            | 3 |
| <i>circDGKB</i> | miR-3150a-3p                        | 1 |
| <i>circDGKB</i> | miR-3150b-3p                        | 1 |
| <i>circDGKB</i> | miR-3152-3p                         | 1 |
| <i>circDGKB</i> | miR-3156-5p                         | 1 |
| <i>circDGKB</i> | miR-3158-5p                         | 2 |
| <i>circDGKB</i> | miR-3160-3p                         | 1 |
| <i>circDGKB</i> | miR-3163                            | 2 |
| <i>circDGKB</i> | miR-3164                            | 1 |
| <i>circDGKB</i> | miR-3165                            | 3 |

|                 |                           |   |
|-----------------|---------------------------|---|
| <i>circDGKB</i> | miR-3166                  | 1 |
| <i>circDGKB</i> | miR-3173-3p/6891-5p       | 3 |
| <i>circDGKB</i> | miR-3175                  | 1 |
| <i>circDGKB</i> | miR-3180-5p               | 2 |
| <i>circDGKB</i> | miR-3190-3p               | 2 |
| <i>circDGKB</i> | miR-3192-3p               | 1 |
| <i>circDGKB</i> | miR-3199/8052             | 1 |
| <i>circDGKB</i> | miR-3200-5p               | 2 |
| <i>circDGKB</i> | miR-324-3p/1913           | 3 |
| <i>circDGKB</i> | miR-324-5p                | 2 |
| <i>circDGKB</i> | miR-329-5p                | 2 |
| <i>circDGKB</i> | miR-338-3p                | 2 |
| <i>circDGKB</i> | miR-33b-3p/515-3p/519e-3p | 1 |
| <i>circDGKB</i> | miR-345-3p                | 2 |
| <i>circDGKB</i> | miR-3529-3p               | 2 |
| <i>circDGKB</i> | miR-3605-5p               | 2 |
| <i>circDGKB</i> | miR-3611                  | 2 |
| <i>circDGKB</i> | miR-3613-3p               | 1 |
| <i>circDGKB</i> | miR-3619-3p               | 2 |
| <i>circDGKB</i> | miR-365-3p                | 1 |
| <i>circDGKB</i> | miR-3652/4430             | 1 |
| <i>circDGKB</i> | miR-3653-5p               | 5 |
| <i>circDGKB</i> | miR-3659                  | 1 |
| <i>circDGKB</i> | miR-365a-5p/365b-5p       | 1 |
| <i>circDGKB</i> | miR-3662                  | 3 |
| <i>circDGKB</i> | miR-3664-5p               | 4 |
| <i>circDGKB</i> | miR-3665                  | 1 |
| <i>circDGKB</i> | miR-3668                  | 2 |
| <i>circDGKB</i> | miR-3671                  | 1 |
| <i>circDGKB</i> | miR-3675-5p               | 1 |
| <i>circDGKB</i> | miR-3680-5p               | 1 |
| <i>circDGKB</i> | miR-3682-5p               | 3 |
| <i>circDGKB</i> | miR-3688-3p               | 4 |
| <i>circDGKB</i> | miR-3689d/6851-5p         | 1 |
| <i>circDGKB</i> | miR-369-3p                | 1 |
| <i>circDGKB</i> | miR-3692-3p               | 2 |
| <i>circDGKB</i> | miR-371-5p                | 1 |
| <i>circDGKB</i> | miR-371a-3p               | 1 |

|                 |                           |   |
|-----------------|---------------------------|---|
| <i>circDGKB</i> | miR-371b-3p               | 1 |
| <i>circDGKB</i> | miR-371b-5p/373-5p/616-5p | 1 |
| <i>circDGKB</i> | miR-372-5p                | 1 |
| <i>circDGKB</i> | miR-374a-3p               | 1 |
| <i>circDGKB</i> | miR-375                   | 2 |
| <i>circDGKB</i> | miR-377-5p/6086           | 2 |
| <i>circDGKB</i> | miR-378a-5p               | 4 |
| <i>circDGKB</i> | miR-380-3p                | 2 |
| <i>circDGKB</i> | miR-380-5p/563            | 2 |
| <i>circDGKB</i> | miR-382-3p                | 1 |
| <i>circDGKB</i> | miR-383-3p                | 1 |
| <i>circDGKB</i> | miR-3915                  | 2 |
| <i>circDGKB</i> | miR-3919                  | 1 |
| <i>circDGKB</i> | miR-3922-5p               | 2 |
| <i>circDGKB</i> | miR-3925-3p               | 2 |
| <i>circDGKB</i> | miR-3925-5p               | 2 |
| <i>circDGKB</i> | miR-3926                  | 2 |
| <i>circDGKB</i> | miR-3934-5p               | 1 |
| <i>circDGKB</i> | miR-3935                  | 2 |
| <i>circDGKB</i> | miR-3936                  | 1 |
| <i>circDGKB</i> | miR-3940-5p/4507          | 1 |
| <i>circDGKB</i> | miR-3942-3p               | 2 |
| <i>circDGKB</i> | miR-3945                  | 1 |
| <i>circDGKB</i> | miR-3973                  | 2 |
| <i>circDGKB</i> | miR-3977                  | 1 |
| <i>circDGKB</i> | miR-3978                  | 2 |
| <i>circDGKB</i> | miR-409-3p                | 1 |
| <i>circDGKB</i> | miR-411-5p.1              | 1 |
| <i>circDGKB</i> | miR-411-5p.2              | 2 |
| <i>circDGKB</i> | miR-421                   | 4 |
| <i>circDGKB</i> | miR-4253/6862-5p          | 1 |
| <i>circDGKB</i> | miR-4255                  | 1 |
| <i>circDGKB</i> | miR-4263                  | 1 |
| <i>circDGKB</i> | miR-4272                  | 2 |
| <i>circDGKB</i> | miR-4277                  | 2 |
| <i>circDGKB</i> | miR-4282                  | 3 |
| <i>circDGKB</i> | miR-4293                  | 3 |
| <i>circDGKB</i> | miR-4301                  | 3 |

|                 |                     |   |
|-----------------|---------------------|---|
| <i>circDGKB</i> | miR-4311            | 6 |
| <i>circDGKB</i> | miR-4317            | 1 |
| <i>circDGKB</i> | miR-4318            | 1 |
| <i>circDGKB</i> | miR-432-5p          | 1 |
| <i>circDGKB</i> | miR-4324            | 4 |
| <i>circDGKB</i> | miR-4326            | 3 |
| <i>circDGKB</i> | miR-433-3p          | 5 |
| <i>circDGKB</i> | miR-4417            | 1 |
| <i>circDGKB</i> | miR-4423-3p         | 2 |
| <i>circDGKB</i> | miR-4426/4647/4662b | 3 |
| <i>circDGKB</i> | miR-4427            | 1 |
| <i>circDGKB</i> | miR-4428            | 3 |
| <i>circDGKB</i> | miR-4433a-3p        | 2 |
| <i>circDGKB</i> | miR-4433b-3p        | 2 |
| <i>circDGKB</i> | miR-4434/4516/5703  | 1 |
| <i>circDGKB</i> | miR-4459            | 2 |
| <i>circDGKB</i> | miR-4464/4748       | 5 |
| <i>circDGKB</i> | miR-4470            | 1 |
| <i>circDGKB</i> | miR-4477a           | 2 |
| <i>circDGKB</i> | miR-448             | 3 |
| <i>circDGKB</i> | miR-4481/4745-5p    | 3 |
| <i>circDGKB</i> | miR-4484            | 2 |
| <i>circDGKB</i> | miR-4487            | 1 |
| <i>circDGKB</i> | miR-4490            | 1 |
| <i>circDGKB</i> | miR-4494            | 1 |
| <i>circDGKB</i> | miR-4496            | 2 |
| <i>circDGKB</i> | miR-4501            | 2 |
| <i>circDGKB</i> | miR-4502            | 2 |
| <i>circDGKB</i> | miR-4505/5787       | 1 |
| <i>circDGKB</i> | miR-4509            | 1 |
| <i>circDGKB</i> | miR-450a-1-3p       | 1 |
| <i>circDGKB</i> | miR-451             | 2 |
| <i>circDGKB</i> | miR-4515            | 1 |
| <i>circDGKB</i> | miR-452-3p          | 2 |
| <i>circDGKB</i> | miR-4520-2-3p       | 2 |
| <i>circDGKB</i> | miR-4520-3p         | 4 |
| <i>circDGKB</i> | miR-4522            | 3 |
| <i>circDGKB</i> | miR-4529-3p         | 2 |

|                 |                             |   |
|-----------------|-----------------------------|---|
| <i>circDGKB</i> | miR-4530                    | 2 |
| <i>circDGKB</i> | miR-4531                    | 1 |
| <i>circDGKB</i> | miR-4534/8082               | 7 |
| <i>circDGKB</i> | miR-4535                    | 2 |
| <i>circDGKB</i> | miR-455-5p                  | 1 |
| <i>circDGKB</i> | miR-4643                    | 1 |
| <i>circDGKB</i> | miR-4649-3p                 | 2 |
| <i>circDGKB</i> | miR-4653-3p                 | 2 |
| <i>circDGKB</i> | miR-4656                    | 1 |
| <i>circDGKB</i> | miR-4670-3p                 | 1 |
| <i>circDGKB</i> | miR-4674                    | 2 |
| <i>circDGKB</i> | miR-4675/4741               | 1 |
| <i>circDGKB</i> | miR-4678                    | 1 |
| <i>circDGKB</i> | miR-4680-3p                 | 1 |
| <i>circDGKB</i> | miR-4683                    | 1 |
| <i>circDGKB</i> | miR-4685-5p/6837-5p         | 1 |
| <i>circDGKB</i> | miR-4686                    | 2 |
| <i>circDGKB</i> | miR-4688/6743-5p            | 1 |
| <i>circDGKB</i> | miR-4689/6858-5p            | 2 |
| <i>circDGKB</i> | miR-4691-3p                 | 2 |
| <i>circDGKB</i> | miR-4691-5p/6792-3p         | 2 |
| <i>circDGKB</i> | miR-4693-5p                 | 2 |
| <i>circDGKB</i> | miR-4694-3p                 | 1 |
| <i>circDGKB</i> | miR-4695-5p                 | 2 |
| <i>circDGKB</i> | miR-4696                    | 1 |
| <i>circDGKB</i> | miR-4697-3p                 | 1 |
| <i>circDGKB</i> | miR-4698                    | 2 |
| <i>circDGKB</i> | miR-4699-3p                 | 1 |
| <i>circDGKB</i> | miR-4705                    | 2 |
| <i>circDGKB</i> | miR-4708-5p                 | 1 |
| <i>circDGKB</i> | miR-4709-5p                 | 3 |
| <i>circDGKB</i> | miR-4710                    | 1 |
| <i>circDGKB</i> | miR-4712-3p                 | 2 |
| <i>circDGKB</i> | miR-4714-5p                 | 4 |
| <i>circDGKB</i> | miR-4717-5p                 | 2 |
| <i>circDGKB</i> | miR-4720-5p/4799-3p/5588-5p | 1 |
| <i>circDGKB</i> | miR-4727-5p                 | 4 |
| <i>circDGKB</i> | miR-4729                    | 4 |

|                 |                     |   |
|-----------------|---------------------|---|
| <i>circDGKB</i> | miR-4731-5p         | 1 |
| <i>circDGKB</i> | miR-4740-5p         | 1 |
| <i>circDGKB</i> | miR-4744            | 1 |
| <i>circDGKB</i> | miR-4752            | 1 |
| <i>circDGKB</i> | miR-4753-5p         | 4 |
| <i>circDGKB</i> | miR-4755-3p         | 1 |
| <i>circDGKB</i> | miR-4756-3p         | 1 |
| <i>circDGKB</i> | miR-4760-3p         | 1 |
| <i>circDGKB</i> | miR-4763-5p         | 4 |
| <i>circDGKB</i> | miR-4766-3p         | 2 |
| <i>circDGKB</i> | miR-4768-3p         | 2 |
| <i>circDGKB</i> | miR-4771            | 1 |
| <i>circDGKB</i> | miR-4774-5p         | 1 |
| <i>circDGKB</i> | miR-4775            | 2 |
| <i>circDGKB</i> | miR-4776-5p         | 2 |
| <i>circDGKB</i> | miR-4778-5p         | 3 |
| <i>circDGKB</i> | miR-4779            | 2 |
| <i>circDGKB</i> | miR-4781-3p         | 1 |
| <i>circDGKB</i> | miR-4782-5p/5706    | 3 |
| <i>circDGKB</i> | miR-4786-5p         | 1 |
| <i>circDGKB</i> | miR-4789-3p         | 1 |
| <i>circDGKB</i> | miR-4792            | 1 |
| <i>circDGKB</i> | miR-4793-5p         | 2 |
| <i>circDGKB</i> | miR-4797-5p         | 2 |
| <i>circDGKB</i> | miR-4798-3p         | 1 |
| <i>circDGKB</i> | miR-4799-5p         | 3 |
| <i>circDGKB</i> | miR-4800-5p         | 1 |
| <i>circDGKB</i> | miR-483-3p.1        | 1 |
| <i>circDGKB</i> | miR-483-3p.2        | 1 |
| <i>circDGKB</i> | miR-486-3p          | 1 |
| <i>circDGKB</i> | miR-487a-5p/487b-5p | 2 |
| <i>circDGKB</i> | miR-490-3p          | 2 |
| <i>circDGKB</i> | miR-492             | 1 |
| <i>circDGKB</i> | miR-493-3p          | 4 |
| <i>circDGKB</i> | miR-495-3p          | 4 |
| <i>circDGKB</i> | miR-499a-3p/499b-3p | 1 |
| <i>circDGKB</i> | miR-499b-5p         | 1 |
| <i>circDGKB</i> | miR-5001-3p         | 4 |

|                 |                                         |   |
|-----------------|-----------------------------------------|---|
| <i>circDGKB</i> | miR-5003-3p                             | 3 |
| <i>circDGKB</i> | miR-5003-5p                             | 1 |
| <i>circDGKB</i> | miR-5004-3p                             | 1 |
| <i>circDGKB</i> | miR-5006-5p                             | 1 |
| <i>circDGKB</i> | miR-5007-3p                             | 1 |
| <i>circDGKB</i> | miR-5008-3p/6737-3p/7157-3p             | 1 |
| <i>circDGKB</i> | miR-5009-5p/8058                        | 1 |
| <i>circDGKB</i> | miR-500a-5p                             | 1 |
| <i>circDGKB</i> | miR-500b-3p                             | 3 |
| <i>circDGKB</i> | miR-5010-3p                             | 1 |
| <i>circDGKB</i> | miR-503-5p                              | 2 |
| <i>circDGKB</i> | miR-505-3p.2                            | 4 |
| <i>circDGKB</i> | miR-5093                                | 1 |
| <i>circDGKB</i> | miR-510-3p                              | 2 |
| <i>circDGKB</i> | miR-513a-3p/513c-3p/3606-3p             | 2 |
| <i>circDGKB</i> | miR-514a-3p                             | 3 |
| <i>circDGKB</i> | miR-514a-5p                             | 4 |
| <i>circDGKB</i> | miR-515-5p/519e-5p                      | 1 |
| <i>circDGKB</i> | miR-516b-5p                             | 3 |
| <i>circDGKB</i> | miR-5187-3p                             | 1 |
| <i>circDGKB</i> | miR-5189-3p                             | 2 |
| <i>circDGKB</i> | miR-518a-5p/527                         | 4 |
| <i>circDGKB</i> | miR-5190                                | 2 |
| <i>circDGKB</i> | miR-5196-3p                             | 2 |
| <i>circDGKB</i> | miR-520f-5p                             | 1 |
| <i>circDGKB</i> | miR-520g-3p                             | 2 |
| <i>circDGKB</i> | miR-522-3p                              | 1 |
| <i>circDGKB</i> | miR-532-5p                              | 2 |
| <i>circDGKB</i> | miR-539-3p                              | 1 |
| <i>circDGKB</i> | miR-539-5p                              | 3 |
| <i>circDGKB</i> | miR-543                                 | 1 |
| <i>circDGKB</i> | miR-544a                                | 2 |
| <i>circDGKB</i> | miR-544b                                | 4 |
| <i>circDGKB</i> | miR-545-3p                              | 4 |
| <i>circDGKB</i> | miR-548ac/548bb-3p/548d-3p/548h-3p/548z | 4 |
| <i>circDGKB</i> | miR-548ah-5p/3609                       | 3 |
| <i>circDGKB</i> | miR-548aj-5p/548f-5p/548g-5p/548x-5p    | 1 |
| <i>circDGKB</i> | miR-548an                               | 2 |



|                 |                                                                   |   |
|-----------------|-------------------------------------------------------------------|---|
| <i>circDGKB</i> | miR-548ap-3p/548aa/548t-3p                                        | 1 |
| <i>circDGKB</i> | miR-548aq-3p/548am-3p/548aj-3p/548ah1-3p/548ae-3p/548j-3p/548x-3p |   |
| <i>circDGKB</i> | miR-548as-3p                                                      | 1 |
| <i>circDGKB</i> | miR-548aw                                                         | 4 |
| <i>circDGKB</i> | miR-548ay-3p/548at-3p                                             | 1 |
| <i>circDGKB</i> | miR-548az-5p/548t-5p                                              | 3 |
| <i>circDGKB</i> | miR-548g-3p                                                       | 1 |
| <i>circDGKB</i> | miR-548n                                                          | 3 |
| <i>circDGKB</i> | miR-548u/7161-5p                                                  | 3 |
| <i>circDGKB</i> | miR-550a-3-5p/550a-5p/1271-3p                                     | 2 |
| <i>circDGKB</i> | miR-550b-2-5p                                                     | 1 |
| <i>circDGKB</i> | miR-551b-5p                                                       | 2 |
| <i>circDGKB</i> | miR-552-3p                                                        | 1 |
| <i>circDGKB</i> | miR-5571-5p                                                       | 1 |
| <i>circDGKB</i> | miR-5579-3p                                                       | 1 |
| <i>circDGKB</i> | miR-558                                                           | 1 |
| <i>circDGKB</i> | miR-5586-3p                                                       | 3 |
| <i>circDGKB</i> | miR-5589-5p                                                       | 1 |
| <i>circDGKB</i> | miR-5680                                                          | 2 |
| <i>circDGKB</i> | miR-5681a                                                         | 1 |
| <i>circDGKB</i> | miR-5683                                                          | 1 |
| <i>circDGKB</i> | miR-5690                                                          | 1 |
| <i>circDGKB</i> | miR-5692bc                                                        | 1 |
| <i>circDGKB</i> | miR-5696                                                          | 3 |
| <i>circDGKB</i> | miR-570-3p                                                        | 2 |
| <i>circDGKB</i> | miR-5700                                                          | 2 |
| <i>circDGKB</i> | miR-573/3616-5p                                                   | 1 |
| <i>circDGKB</i> | miR-574-5p                                                        | 1 |
| <i>circDGKB</i> | miR-576-3p                                                        | 1 |
| <i>circDGKB</i> | miR-576-5p                                                        | 1 |
| <i>circDGKB</i> | miR-579-3p                                                        | 3 |
| <i>circDGKB</i> | miR-580-3p                                                        | 3 |
| <i>circDGKB</i> | miR-580-5p                                                        | 2 |
| <i>circDGKB</i> | miR-582-5p                                                        | 2 |
| <i>circDGKB</i> | miR-583                                                           | 6 |
| <i>circDGKB</i> | miR-587                                                           | 1 |
| <i>circDGKB</i> | miR-589-5p                                                        | 1 |
| <i>circDGKB</i> | miR-590-3p                                                        | 2 |

|                 |                  |   |
|-----------------|------------------|---|
| <i>circDGKB</i> | miR-591          | 1 |
| <i>circDGKB</i> | miR-596          | 3 |
| <i>circDGKB</i> | miR-605-5p       | 1 |
| <i>circDGKB</i> | miR-6068         | 1 |
| <i>circDGKB</i> | miR-6079         | 5 |
| <i>circDGKB</i> | miR-6085/6813-5p | 1 |
| <i>circDGKB</i> | miR-6124         | 3 |
| <i>circDGKB</i> | miR-6126         | 8 |
| <i>circDGKB</i> | miR-6128         | 4 |
| <i>circDGKB</i> | miR-617          | 1 |
| <i>circDGKB</i> | miR-618          | 3 |
| <i>circDGKB</i> | miR-622          | 2 |
| <i>circDGKB</i> | miR-624-3p       | 3 |
| <i>circDGKB</i> | miR-627-3p       | 2 |
| <i>circDGKB</i> | miR-629-5p       | 1 |
| <i>circDGKB</i> | miR-635/6774-5p  | 1 |
| <i>circDGKB</i> | miR-636          | 1 |
| <i>circDGKB</i> | miR-641/3617-5p  | 6 |
| <i>circDGKB</i> | miR-642b-5p      | 4 |
| <i>circDGKB</i> | miR-645          | 1 |
| <i>circDGKB</i> | miR-646          | 2 |
| <i>circDGKB</i> | miR-649          | 2 |
| <i>circDGKB</i> | miR-6505-3p      | 1 |
| <i>circDGKB</i> | miR-6507-5p      | 2 |
| <i>circDGKB</i> | miR-651-3p       | 3 |
| <i>circDGKB</i> | miR-6511-3p      | 1 |
| <i>circDGKB</i> | miR-6511-5p      | 1 |
| <i>circDGKB</i> | miR-6513-5p      | 1 |
| <i>circDGKB</i> | miR-6514-3p      | 2 |
| <i>circDGKB</i> | miR-6516-3p      | 2 |
| <i>circDGKB</i> | miR-655-5p       | 2 |
| <i>circDGKB</i> | miR-656-3p       | 1 |
| <i>circDGKB</i> | miR-657          | 1 |
| <i>circDGKB</i> | miR-659-5p       | 1 |
| <i>circDGKB</i> | miR-661          | 1 |
| <i>circDGKB</i> | miR-665          | 1 |
| <i>circDGKB</i> | miR-668-3p       | 2 |
| <i>circDGKB</i> | miR-6728-3p      | 5 |

|                 |                     |   |
|-----------------|---------------------|---|
| <i>circDGKB</i> | miR-6730-5p         | 1 |
| <i>circDGKB</i> | miR-6735-3p         | 3 |
| <i>circDGKB</i> | miR-6738-3p         | 2 |
| <i>circDGKB</i> | miR-6749-3p         | 2 |
| <i>circDGKB</i> | miR-6750-3p         | 1 |
| <i>circDGKB</i> | miR-6759-3p         | 1 |
| <i>circDGKB</i> | miR-6768-3p         | 2 |
| <i>circDGKB</i> | miR-6768-5p         | 1 |
| <i>circDGKB</i> | miR-6776-5p         | 1 |
| <i>circDGKB</i> | miR-6778-3p         | 1 |
| <i>circDGKB</i> | miR-6782-3p         | 4 |
| <i>circDGKB</i> | miR-6784-3p/6862-3p | 1 |
| <i>circDGKB</i> | miR-6791-3p/6829-3p | 1 |
| <i>circDGKB</i> | miR-6793-3p         | 1 |
| <i>circDGKB</i> | miR-6794-3p         | 1 |
| <i>circDGKB</i> | miR-6799-5p         | 1 |
| <i>circDGKB</i> | miR-6802-3p         | 3 |
| <i>circDGKB</i> | miR-6806-5p         | 2 |
| <i>circDGKB</i> | miR-6808-3p         | 1 |
| <i>circDGKB</i> | miR-6809-5p         | 2 |
| <i>circDGKB</i> | miR-6810-5p         | 1 |
| <i>circDGKB</i> | miR-6811-3p         | 1 |
| <i>circDGKB</i> | miR-6815-5p/6865-5p | 1 |
| <i>circDGKB</i> | miR-6816-3p         | 3 |
| <i>circDGKB</i> | miR-6822-3p         | 1 |
| <i>circDGKB</i> | miR-6823-5p         | 1 |
| <i>circDGKB</i> | miR-6825-5p         | 1 |
| <i>circDGKB</i> | miR-6829-5p         | 1 |
| <i>circDGKB</i> | miR-6830-3p         | 1 |
| <i>circDGKB</i> | miR-6830-5p         | 3 |
| <i>circDGKB</i> | miR-6833-5p         | 1 |
| <i>circDGKB</i> | miR-6836-3p         | 3 |
| <i>circDGKB</i> | miR-6839-3p         | 1 |
| <i>circDGKB</i> | miR-6857-5p         | 1 |
| <i>circDGKB</i> | miR-6861-3p         | 1 |
| <i>circDGKB</i> | miR-6861-5p         | 1 |
| <i>circDGKB</i> | miR-6864-5p         | 8 |
| <i>circDGKB</i> | miR-6868-5p         | 1 |

|                 |                           |   |
|-----------------|---------------------------|---|
| <i>circDGKB</i> | miR-6870-3p               | 1 |
| <i>circDGKB</i> | miR-6880-5p               | 3 |
| <i>circDGKB</i> | miR-6888-5p               | 2 |
| <i>circDGKB</i> | miR-6889-3p               | 1 |
| <i>circDGKB</i> | miR-6890-5p               | 1 |
| <i>circDGKB</i> | miR-6894-3p               | 2 |
| <i>circDGKB</i> | miR-6894-5p               | 4 |
| <i>circDGKB</i> | miR-7-3p                  | 3 |
| <i>circDGKB</i> | miR-7106-5p               | 1 |
| <i>circDGKB</i> | miR-7113-5p               | 1 |
| <i>circDGKB</i> | miR-7114-5p               | 2 |
| <i>circDGKB</i> | miR-7152-5p               | 8 |
| <i>circDGKB</i> | miR-7154-3p               | 4 |
| <i>circDGKB</i> | miR-7154-5p               | 5 |
| <i>circDGKB</i> | miR-7156-3p               | 1 |
| <i>circDGKB</i> | miR-7159-5p               | 4 |
| <i>circDGKB</i> | miR-7161-3p               | 1 |
| <i>circDGKB</i> | miR-7162-3p               | 2 |
| <i>circDGKB</i> | miR-758-3p                | 1 |
| <i>circDGKB</i> | miR-758-5p                | 2 |
| <i>circDGKB</i> | miR-759                   | 2 |
| <i>circDGKB</i> | miR-760                   | 1 |
| <i>circDGKB</i> | miR-762/4492/4498/5001-5p | 1 |
| <i>circDGKB</i> | miR-7641                  | 1 |
| <i>circDGKB</i> | miR-765                   | 4 |
| <i>circDGKB</i> | miR-766-3p                | 2 |
| <i>circDGKB</i> | miR-766-5p                | 4 |
| <i>circDGKB</i> | miR-769-5p                | 1 |
| <i>circDGKB</i> | miR-7847-3p               | 1 |
| <i>circDGKB</i> | miR-7850-5p               | 1 |
| <i>circDGKB</i> | miR-7852-3p               | 2 |
| <i>circDGKB</i> | miR-7977                  | 2 |
| <i>circDGKB</i> | miR-8062                  | 2 |
| <i>circDGKB</i> | miR-8063                  | 2 |
| <i>circDGKB</i> | miR-8064                  | 2 |
| <i>circDGKB</i> | miR-8066                  | 2 |
| <i>circDGKB</i> | miR-8071                  | 3 |
| <i>circDGKB</i> | miR-8080                  | 3 |

|                 |                     |   |
|-----------------|---------------------|---|
| <i>circDGKB</i> | miR-875-3p          | 1 |
| <i>circDGKB</i> | miR-887-5p          | 1 |
| <i>circDGKB</i> | miR-888-5p          | 1 |
| <i>circDGKB</i> | miR-892a            | 1 |
| <i>circDGKB</i> | miR-922             | 3 |
| <i>circDGKB</i> | miR-935             | 2 |
| <i>circDGKB</i> | miR-936             | 1 |
| <i>circDGKB</i> | miR-939-5p/1343-5p  | 1 |
| <i>circDGKB</i> | miR-943             | 1 |
| <i>circDGKB</i> | miR-95-5p           | 1 |
| <i>circDGKB</i> | miR-96-3p           | 2 |
| <i>circDGKB</i> | miR-96-5p/1271-5p   | 1 |
| <i>circDGKB</i> | miR-409-5p          | 1 |
| <i>circDGKB</i> | miR-4251            | 3 |
| <i>circDGKB</i> | miR-4329            | 3 |
| <i>circDGKB</i> | miR-6761-5p         | 3 |
| <i>circDGKB</i> | miR-1193            | 1 |
| <i>circDGKB</i> | miR-1-3p/206        | 5 |
| <i>circDGKB</i> | miR-105-3p          | 1 |
| <i>circDGKB</i> | miR-1197            | 2 |
| <i>circDGKB</i> | miR-1227-3p         | 3 |
| <i>circDGKB</i> | miR-1231            | 2 |
| <i>circDGKB</i> | miR-1233-5p/6778-5p | 1 |
| <i>circDGKB</i> | miR-1238-5p/4758-5p | 2 |
| <i>circDGKB</i> | miR-1245b-3p        | 1 |
| <i>circDGKB</i> | miR-1246            | 2 |
| <i>circDGKB</i> | miR-1252-3p         | 3 |
| <i>circDGKB</i> | miR-1255a/1255b-5p  | 1 |
| <i>circDGKB</i> | miR-127-5p          | 1 |
| <i>circDGKB</i> | miR-1272            | 6 |
| <i>circDGKB</i> | miR-1273a           | 2 |
| <i>circDGKB</i> | miR-1273e           | 2 |
| <i>circDGKB</i> | miR-1273h-3p        | 1 |
| <i>circDGKB</i> | miR-128-3p          | 1 |
| <i>circDGKB</i> | miR-1288-5p         | 1 |
| <i>circDGKB</i> | miR-1296-3p         | 1 |
| <i>circDGKB</i> | miR-1322            | 6 |
| <i>circDGKB</i> | miR-1323            | 1 |

|                 |                                 |   |
|-----------------|---------------------------------|---|
| <i>circDGKB</i> | miR-1343-3p                     | 6 |
| <i>circDGKB</i> | miR-135-5p                      | 1 |
| <i>circDGKB</i> | miR-137                         | 1 |
| <i>circDGKB</i> | miR-141-3p/200-3p               | 1 |
| <i>circDGKB</i> | miR-1470                        | 2 |
| <i>circDGKB</i> | miR-147a                        | 2 |
| <i>circDGKB</i> | miR-181-3p/4420                 | 4 |
| <i>circDGKB</i> | miR-186-5p                      | 1 |
| <i>circDGKB</i> | miR-187-3p                      | 2 |
| <i>circDGKB</i> | miR-1909-3p/6722-3p             | 1 |
| <i>circDGKB</i> | miR-1910-5p                     | 1 |
| <i>circDGKB</i> | miR-194-3p                      | 1 |
| <i>circDGKB</i> | miR-196b-3p                     | 2 |
| <i>circDGKB</i> | miR-198                         | 1 |
| <i>circDGKB</i> | miR-202-5p                      | 1 |
| <i>circDGKB</i> | miR-203b-3p                     | 1 |
| <i>circDGKB</i> | miR-2053                        | 1 |
| <i>circDGKB</i> | miR-2115-5p                     | 3 |
| <i>circDGKB</i> | miR-217                         | 3 |
| <i>circDGKB</i> | miR-2276-3p                     | 3 |
| <i>circDGKB</i> | miR-2276-5p                     | 1 |
| <i>circDGKB</i> | miR-2277-3p                     | 2 |
| <i>circDGKB</i> | miR-23-3p                       | 1 |
| <i>circDGKB</i> | miR-2355-5p                     | 2 |
| <i>circDGKB</i> | miR-24-5p                       | 2 |
| <i>circDGKB</i> | miR-26b-3p                      | 1 |
| <i>circDGKB</i> | miR-27a-5p                      | 2 |
| <i>circDGKB</i> | miR-2861                        | 2 |
| <i>circDGKB</i> | miR-29-3p                       | 1 |
| <i>circDGKB</i> | miR-298                         | 1 |
| <i>circDGKB</i> | miR-302-3p/372-3p/373-3p/520-3p | 1 |
| <i>circDGKB</i> | miR-302b-5p/302d-5p             | 1 |
| <i>circDGKB</i> | miR-302c-5p                     | 2 |
| <i>circDGKB</i> | miR-3074-3p                     | 1 |
| <i>circDGKB</i> | miR-3120-5p                     | 2 |
| <i>circDGKB</i> | miR-3125/3916/6859-5p           | 2 |
| <i>circDGKB</i> | miR-3133                        | 1 |
| <i>circDGKB</i> | miR-3151-5p                     | 1 |

|                 |                                   |   |
|-----------------|-----------------------------------|---|
| <i>circDGKB</i> | miR-3152-5p                       | 1 |
| <i>circDGKB</i> | miR-3161                          | 2 |
| <i>circDGKB</i> | miR-3169                          | 1 |
| <i>circDGKB</i> | miR-3185                          | 2 |
| <i>circDGKB</i> | miR-3191-5p                       | 4 |
| <i>circDGKB</i> | miR-3193                          | 2 |
| <i>circDGKB</i> | miR-3200-3p                       | 1 |
| <i>circDGKB</i> | miR-326                           | 2 |
| <i>circDGKB</i> | miR-33-5p                         | 1 |
| <i>circDGKB</i> | miR-337-3p                        | 2 |
| <i>circDGKB</i> | miR-339-3p                        | 1 |
| <i>circDGKB</i> | miR-33a-3p                        | 1 |
| <i>circDGKB</i> | miR-3646                          | 3 |
| <i>circDGKB</i> | miR-3660/4526                     | 1 |
| <i>circDGKB</i> | miR-3663-3p                       | 1 |
| <i>circDGKB</i> | miR-3663-5p                       | 1 |
| <i>circDGKB</i> | miR-3667-5p                       | 3 |
| <i>circDGKB</i> | miR-3678-3p                       | 1 |
| <i>circDGKB</i> | miR-3679-3p                       | 2 |
| <i>circDGKB</i> | miR-3682-3p                       | 4 |
| <i>circDGKB</i> | miR-3685                          | 1 |
| <i>circDGKB</i> | miR-3687/4442                     | 2 |
| <i>circDGKB</i> | miR-3689a-5p/3689b-5p/3689e/3689f | 1 |
| <i>circDGKB</i> | miR-3690                          | 4 |
| <i>circDGKB</i> | miR-3691-3p                       | 1 |
| <i>circDGKB</i> | miR-3692-5p                       | 2 |
| <i>circDGKB</i> | miR-378-3p                        | 1 |
| <i>circDGKB</i> | miR-378g                          | 2 |
| <i>circDGKB</i> | miR-383-5p.2                      | 2 |
| <i>circDGKB</i> | miR-384                           | 1 |
| <i>circDGKB</i> | miR-3911                          | 2 |
| <i>circDGKB</i> | miR-3912-5p                       | 1 |
| <i>circDGKB</i> | miR-3914                          | 1 |
| <i>circDGKB</i> | miR-3918                          | 2 |
| <i>circDGKB</i> | miR-3920                          | 1 |
| <i>circDGKB</i> | miR-3927-5p                       | 2 |
| <i>circDGKB</i> | miR-3928-3p                       | 6 |
| <i>circDGKB</i> | miR-3941                          | 1 |

|                 |                           |   |
|-----------------|---------------------------|---|
| <i>circDGKB</i> | miR-423-3p                | 1 |
| <i>circDGKB</i> | miR-425-5p                | 1 |
| <i>circDGKB</i> | miR-4254                  | 4 |
| <i>circDGKB</i> | miR-4268                  | 2 |
| <i>circDGKB</i> | miR-4271/4725-3p/6780b-5p | 1 |
| <i>circDGKB</i> | miR-4279                  | 4 |
| <i>circDGKB</i> | miR-4287/4685-3p          | 1 |
| <i>circDGKB</i> | miR-4289                  | 3 |
| <i>circDGKB</i> | miR-4303                  | 2 |
| <i>circDGKB</i> | miR-4307                  | 1 |
| <i>circDGKB</i> | miR-4320                  | 2 |
| <i>circDGKB</i> | miR-4421/5699-3p          | 2 |
| <i>circDGKB</i> | miR-4436b-5p              | 2 |
| <i>circDGKB</i> | miR-4443                  | 2 |
| <i>circDGKB</i> | miR-4447/4472             | 1 |
| <i>circDGKB</i> | miR-4448                  | 2 |
| <i>circDGKB</i> | miR-4462                  | 1 |
| <i>circDGKB</i> | miR-4469                  | 1 |
| <i>circDGKB</i> | miR-4474-3p               | 2 |
| <i>circDGKB</i> | miR-4476/6876-5p          | 2 |
| <i>circDGKB</i> | miR-4486                  | 2 |
| <i>circDGKB</i> | miR-450b-3p/769-3p        | 1 |
| <i>circDGKB</i> | miR-4512                  | 2 |
| <i>circDGKB</i> | miR-4513/6855-3p          | 1 |
| <i>circDGKB</i> | miR-452-5p/892-3p         | 1 |
| <i>circDGKB</i> | miR-4527/6503-5p          | 2 |
| <i>circDGKB</i> | miR-4528                  | 1 |
| <i>circDGKB</i> | miR-4536-5p               | 1 |
| <i>circDGKB</i> | miR-4539                  | 2 |
| <i>circDGKB</i> | miR-455-3p.1              | 1 |
| <i>circDGKB</i> | miR-4635                  | 2 |
| <i>circDGKB</i> | miR-4638-3p               | 1 |
| <i>circDGKB</i> | miR-4648                  | 1 |
| <i>circDGKB</i> | miR-4654/4769-5p          | 1 |
| <i>circDGKB</i> | miR-4658/6790-5p          | 2 |
| <i>circDGKB</i> | miR-4659a-5p/4659b-5p     | 2 |
| <i>circDGKB</i> | miR-466                   | 2 |
| <i>circDGKB</i> | miR-4666b                 | 1 |



|                 |                          |   |
|-----------------|--------------------------|---|
| <i>circDGKB</i> | miR-4667-3p              | 2 |
| <i>circDGKB</i> | miR-4672                 | 1 |
| <i>circDGKB</i> | miR-4684-3p              | 1 |
| <i>circDGKB</i> | miR-4690-5p              | 1 |
| <i>circDGKB</i> | miR-4700-3p              | 1 |
| <i>circDGKB</i> | miR-4704-3p              | 1 |
| <i>circDGKB</i> | miR-4707-5p              | 2 |
| <i>circDGKB</i> | miR-4711-3p              | 2 |
| <i>circDGKB</i> | miR-4711-5p              | 1 |
| <i>circDGKB</i> | miR-4714-3p              | 1 |
| <i>circDGKB</i> | miR-4715-3p              | 1 |
| <i>circDGKB</i> | miR-4719                 | 1 |
| <i>circDGKB</i> | miR-4722-3p/6727-3p      | 1 |
| <i>circDGKB</i> | miR-4724-3p              | 1 |
| <i>circDGKB</i> | miR-4724-5p              | 2 |
| <i>circDGKB</i> | miR-4728-3p              | 1 |
| <i>circDGKB</i> | miR-4747-5p/5196-5p      | 1 |
| <i>circDGKB</i> | miR-4757-5p/6744-3p      | 1 |
| <i>circDGKB</i> | miR-4759                 | 1 |
| <i>circDGKB</i> | miR-4764-5p              | 1 |
| <i>circDGKB</i> | miR-4772-3p              | 3 |
| <i>circDGKB</i> | miR-4774-3p              | 1 |
| <i>circDGKB</i> | miR-4778-3p              | 2 |
| <i>circDGKB</i> | miR-4790-3p              | 3 |
| <i>circDGKB</i> | miR-488-3p               | 3 |
| <i>circDGKB</i> | miR-491-5p               | 1 |
| <i>circDGKB</i> | miR-497-3p               | 1 |
| <i>circDGKB</i> | miR-498                  | 2 |
| <i>circDGKB</i> | miR-5000-3p              | 1 |
| <i>circDGKB</i> | miR-5002-3p              | 1 |
| <i>circDGKB</i> | miR-500a-3p              | 1 |
| <i>circDGKB</i> | miR-501-3p/502-3p        | 1 |
| <i>circDGKB</i> | miR-5011-3p              | 1 |
| <i>circDGKB</i> | miR-505-5p               | 1 |
| <i>circDGKB</i> | miR-5089-5p              | 1 |
| <i>circDGKB</i> | miR-509-3-5p/509-5p/4418 | 3 |
| <i>circDGKB</i> | miR-509-3p               | 1 |
| <i>circDGKB</i> | miR-5094                 | 1 |

|                 |                                               |   |
|-----------------|-----------------------------------------------|---|
| <i>circDGKB</i> | miR-5100                                      | 2 |
| <i>circDGKB</i> | miR-516a-3p/516b-3p/7162-5p                   | 3 |
| <i>circDGKB</i> | miR-5187-5p                                   | 1 |
| <i>circDGKB</i> | miR-518c-5p                                   | 2 |
| <i>circDGKB</i> | miR-519-3p                                    | 1 |
| <i>circDGKB</i> | miR-5195-5p                                   | 2 |
| <i>circDGKB</i> | miR-5197-5p                                   | 1 |
| <i>circDGKB</i> | miR-548ai/548ag/548ba/570-5p                  | 1 |
| <i>circDGKB</i> | miR-548ao-3p                                  | 3 |
| <i>circDGKB</i> | miR-548ao-5p/548ax                            | 2 |
| <i>circDGKB</i> | miR-548av-3p                                  | 1 |
| <i>circDGKB</i> | miR-548az-3p/548ar-3p/548a-3p/548e-3p/548f-3p | 7 |
| <i>circDGKB</i> | miR-548m                                      | 2 |
| <i>circDGKB</i> | miR-549a                                      | 2 |
| <i>circDGKB</i> | miR-552-5p                                    | 1 |
| <i>circDGKB</i> | miR-556-5p                                    | 2 |
| <i>circDGKB</i> | miR-5581-3p                                   | 3 |
| <i>circDGKB</i> | miR-5582-3p                                   | 2 |
| <i>circDGKB</i> | miR-5585-3p                                   | 2 |
| <i>circDGKB</i> | miR-5585-5p                                   | 2 |
| <i>circDGKB</i> | miR-5587-3p                                   | 2 |
| <i>circDGKB</i> | miR-5587-5p                                   | 1 |
| <i>circDGKB</i> | miR-5590-5p                                   | 2 |
| <i>circDGKB</i> | miR-561-5p                                    | 2 |
| <i>circDGKB</i> | miR-5693                                      | 1 |
| <i>circDGKB</i> | miR-5694                                      | 2 |
| <i>circDGKB</i> | miR-5697                                      | 1 |
| <i>circDGKB</i> | miR-5705                                      | 1 |
| <i>circDGKB</i> | miR-5708                                      | 1 |
| <i>circDGKB</i> | miR-578                                       | 2 |
| <i>circDGKB</i> | miR-581                                       | 2 |
| <i>circDGKB</i> | miR-582-3p                                    | 2 |
| <i>circDGKB</i> | miR-586                                       | 1 |
| <i>circDGKB</i> | miR-592                                       | 1 |
| <i>circDGKB</i> | miR-593-3p                                    | 4 |
| <i>circDGKB</i> | miR-595                                       | 1 |
| <i>circDGKB</i> | miR-597-5p                                    | 1 |
| <i>circDGKB</i> | miR-599                                       | 1 |

|                 |                                      |   |
|-----------------|--------------------------------------|---|
| <i>circDGKB</i> | miR-602                              | 1 |
| <i>circDGKB</i> | miR-6071                             | 3 |
| <i>circDGKB</i> | miR-6077                             | 4 |
| <i>circDGKB</i> | miR-6082                             | 2 |
| <i>circDGKB</i> | miR-610                              | 1 |
| <i>circDGKB</i> | miR-612/1285-3p/3187-5p/5189-5p/6860 | 2 |
| <i>circDGKB</i> | miR-6132/6836-5p                     | 1 |
| <i>circDGKB</i> | miR-6165                             | 1 |
| <i>circDGKB</i> | miR-628-5p                           | 1 |
| <i>circDGKB</i> | miR-629-3p                           | 2 |
| <i>circDGKB</i> | miR-631/3661                         | 2 |
| <i>circDGKB</i> | miR-632/4288                         | 2 |
| <i>circDGKB</i> | miR-642a-5p                          | 1 |
| <i>circDGKB</i> | miR-644a                             | 2 |
| <i>circDGKB</i> | miR-648                              | 1 |
| <i>circDGKB</i> | miR-6503-3p                          | 2 |
| <i>circDGKB</i> | miR-6508-5p/8067                     | 1 |
| <i>circDGKB</i> | miR-6509-3p                          | 2 |
| <i>circDGKB</i> | miR-6510-5p                          | 1 |
| <i>circDGKB</i> | miR-6512-5p                          | 1 |
| <i>circDGKB</i> | miR-6513-3p                          | 1 |
| <i>circDGKB</i> | miR-6515-5p                          | 2 |
| <i>circDGKB</i> | miR-6516-5p                          | 1 |
| <i>circDGKB</i> | miR-653-3p                           | 4 |
| <i>circDGKB</i> | miR-671-5p                           | 4 |
| <i>circDGKB</i> | miR-6715a-3p                         | 1 |
| <i>circDGKB</i> | miR-6716-5p                          | 1 |
| <i>circDGKB</i> | miR-6719-3p                          | 1 |
| <i>circDGKB</i> | miR-6728-5p                          | 1 |
| <i>circDGKB</i> | miR-6730-3p                          | 1 |
| <i>circDGKB</i> | miR-6736-3p                          | 1 |
| <i>circDGKB</i> | miR-6740-5p                          | 1 |
| <i>circDGKB</i> | miR-6742-3p                          | 2 |
| <i>circDGKB</i> | miR-6742-5p                          | 1 |
| <i>circDGKB</i> | miR-6744-5p                          | 1 |
| <i>circDGKB</i> | miR-6747-3p                          | 1 |
| <i>circDGKB</i> | miR-6748-3p                          | 2 |
| <i>circDGKB</i> | miR-6753-3p/7107-3p                  | 2 |

|                 |                     |   |
|-----------------|---------------------|---|
| <i>circDGKB</i> | miR-6753-5p         | 1 |
| <i>circDGKB</i> | miR-6757-3p         | 1 |
| <i>circDGKB</i> | miR-6763-3p         | 2 |
| <i>circDGKB</i> | miR-6764-3p/6824-3p | 2 |
| <i>circDGKB</i> | miR-6767-3p         | 1 |
| <i>circDGKB</i> | miR-6772-3p         | 2 |
| <i>circDGKB</i> | miR-6774-3p         | 2 |
| <i>circDGKB</i> | miR-6795-3p         | 2 |
| <i>circDGKB</i> | miR-6804-3p         | 1 |
| <i>circDGKB</i> | miR-6813-3p         | 1 |
| <i>circDGKB</i> | miR-6815-3p         | 1 |
| <i>circDGKB</i> | miR-6818-3p         | 4 |
| <i>circDGKB</i> | miR-6818-5p         | 2 |
| <i>circDGKB</i> | miR-6827-5p         | 1 |
| <i>circDGKB</i> | miR-6828-3p         | 3 |
| <i>circDGKB</i> | miR-6828-5p         | 4 |
| <i>circDGKB</i> | miR-6852-5p         | 2 |
| <i>circDGKB</i> | miR-6853-5p         | 1 |
| <i>circDGKB</i> | miR-6857-3p         | 1 |
| <i>circDGKB</i> | miR-6871-3p         | 1 |
| <i>circDGKB</i> | miR-6871-5p         | 1 |
| <i>circDGKB</i> | miR-6880-3p         | 1 |
| <i>circDGKB</i> | miR-6884-3p         | 2 |
| <i>circDGKB</i> | miR-6887-3p         | 2 |
| <i>circDGKB</i> | miR-6888-3p         | 1 |
| <i>circDGKB</i> | miR-6892-3p         | 1 |
| <i>circDGKB</i> | miR-6895-3p         | 4 |
| <i>circDGKB</i> | miR-6895-5p         | 2 |
| <i>circDGKB</i> | miR-7-5p            | 4 |
| <i>circDGKB</i> | miR-7108-5p         | 2 |
| <i>circDGKB</i> | miR-7112-3p         | 1 |
| <i>circDGKB</i> | miR-7113-3p         | 1 |
| <i>circDGKB</i> | miR-7151-5p         | 3 |
| <i>circDGKB</i> | miR-7152-3p         | 1 |
| <i>circDGKB</i> | miR-7158-3p         | 1 |
| <i>circDGKB</i> | miR-7160-3p         | 2 |
| <i>circDGKB</i> | miR-744-3p          | 1 |
| <i>circDGKB</i> | miR-764             | 2 |

|                 |                    |   |
|-----------------|--------------------|---|
| <i>circDGKB</i> | miR-767-5p         | 1 |
| <i>circDGKB</i> | miR-770-5p         | 1 |
| <i>circDGKB</i> | miR-7843-3p        | 1 |
| <i>circDGKB</i> | miR-8057           | 1 |
| <i>circDGKB</i> | miR-8060           | 5 |
| <i>circDGKB</i> | miR-8070           | 1 |
| <i>circDGKB</i> | miR-8075           | 1 |
| <i>circDGKB</i> | miR-8081           | 3 |
| <i>circDGKB</i> | miR-8083           | 1 |
| <i>circDGKB</i> | miR-8088           | 1 |
| <i>circDGKB</i> | miR-885-5p         | 2 |
| <i>circDGKB</i> | miR-889-5p         | 1 |
| <i>circDGKB</i> | miR-93-3p          | 2 |
| <i>circDGKB</i> | miR-939-3p         | 2 |
| <i>circDGKB</i> | miR-1208           | 1 |
| <i>circDGKB</i> | miR-1228-3p        | 2 |
| <i>circDGKB</i> | miR-1236-5p        | 1 |
| <i>circDGKB</i> | miR-1238-3p        | 2 |
| <i>circDGKB</i> | miR-124-5p         | 1 |
| <i>circDGKB</i> | miR-126-3p.2       | 1 |
| <i>circDGKB</i> | miR-1277-5p        | 2 |
| <i>circDGKB</i> | miR-1283           | 1 |
| <i>circDGKB</i> | miR-1284           | 1 |
| <i>circDGKB</i> | miR-1298-5p        | 2 |
| <i>circDGKB</i> | miR-1305           | 2 |
| <i>circDGKB</i> | miR-138-2-3p       | 1 |
| <i>circDGKB</i> | miR-1537-5p        | 1 |
| <i>circDGKB</i> | miR-16-2-3p/195-3p | 1 |
| <i>circDGKB</i> | miR-185-3p         | 2 |
| <i>circDGKB</i> | miR-1911-5p        | 1 |
| <i>circDGKB</i> | miR-200ab-5p       | 1 |
| <i>circDGKB</i> | miR-205-3p         | 2 |
| <i>circDGKB</i> | miR-205-5p         | 1 |
| <i>circDGKB</i> | miR-2117           | 1 |
| <i>circDGKB</i> | miR-26-3p          | 2 |
| <i>circDGKB</i> | miR-27b-5p         | 3 |
| <i>circDGKB</i> | miR-31-3p          | 1 |
| <i>circDGKB</i> | miR-3130-3p        | 2 |

|                 |                     |   |
|-----------------|---------------------|---|
| <i>circDGKB</i> | miR-32-3p           | 1 |
| <i>circDGKB</i> | miR-335-3p          | 2 |
| <i>circDGKB</i> | miR-338-5p          | 3 |
| <i>circDGKB</i> | miR-340-5p          | 2 |
| <i>circDGKB</i> | miR-34b-3p          | 1 |
| <i>circDGKB</i> | miR-34c-3p          | 1 |
| <i>circDGKB</i> | miR-3607-3p         | 1 |
| <i>circDGKB</i> | miR-361-5p          | 1 |
| <i>circDGKB</i> | miR-370-3p          | 1 |
| <i>circDGKB</i> | miR-374b-3p         | 2 |
| <i>circDGKB</i> | miR-376a-2-5p       | 3 |
| <i>circDGKB</i> | miR-376a-5p         | 3 |
| <i>circDGKB</i> | miR-3924            | 1 |
| <i>circDGKB</i> | miR-3937            | 1 |
| <i>circDGKB</i> | miR-410-3p          | 2 |
| <i>circDGKB</i> | miR-4273/7156-5p    | 1 |
| <i>circDGKB</i> | miR-4431            | 1 |
| <i>circDGKB</i> | miR-4453/4538       | 2 |
| <i>circDGKB</i> | miR-4482-3p         | 2 |
| <i>circDGKB</i> | miR-4511            | 1 |
| <i>circDGKB</i> | miR-4540            | 2 |
| <i>circDGKB</i> | miR-4633-5p         | 1 |
| <i>circDGKB</i> | miR-4652-3p         | 1 |
| <i>circDGKB</i> | miR-4677-5p         | 1 |
| <i>circDGKB</i> | miR-4680-5p         | 1 |
| <i>circDGKB</i> | miR-4684-5p         | 1 |
| <i>circDGKB</i> | miR-4709-3p         | 3 |
| <i>circDGKB</i> | miR-4718            | 1 |
| <i>circDGKB</i> | miR-4743-3p         | 1 |
| <i>circDGKB</i> | miR-4765            | 1 |
| <i>circDGKB</i> | miR-4768-5p/6833-3p | 1 |
| <i>circDGKB</i> | miR-4786-3p         | 3 |
| <i>circDGKB</i> | miR-4793-3p         | 2 |
| <i>circDGKB</i> | miR-489-5p          | 1 |
| <i>circDGKB</i> | miR-4999-5p         | 1 |
| <i>circDGKB</i> | miR-5002-5p         | 1 |
| <i>circDGKB</i> | miR-5009-3p         | 1 |
| <i>circDGKB</i> | miR-5096            | 3 |

|                 |                                                                  |   |
|-----------------|------------------------------------------------------------------|---|
| <i>circDGKB</i> | miR-513b-5p                                                      | 1 |
| <i>circDGKB</i> | miR-548av-5p/548k/8054                                           | 2 |
| <i>circDGKB</i> | miR-548ay-5p/548au-5p/548as-5p/548ar-5p/548aq-5p/548ap-5p/548am- | 2 |
| <i>circDGKB</i> | miR-548b-3p                                                      | 1 |
| <i>circDGKB</i> | miR-548c-3p                                                      | 1 |
| <i>circDGKB</i> | miR-548l                                                         | 2 |
| <i>circDGKB</i> | miR-554                                                          | 2 |
| <i>circDGKB</i> | miR-5579-5p                                                      | 2 |
| <i>circDGKB</i> | miR-5691                                                         | 1 |
| <i>circDGKB</i> | miR-5692a                                                        | 1 |
| <i>circDGKB</i> | miR-607                                                          | 2 |
| <i>circDGKB</i> | miR-6072/6891-3p                                                 | 2 |
| <i>circDGKB</i> | miR-6074                                                         | 1 |
| <i>circDGKB</i> | miR-615-3p                                                       | 3 |
| <i>circDGKB</i> | miR-616-3p                                                       | 2 |
| <i>circDGKB</i> | miR-654-3p                                                       | 1 |
| <i>circDGKB</i> | miR-659-3p                                                       | 1 |
| <i>circDGKB</i> | miR-664a-3p                                                      | 3 |
| <i>circDGKB</i> | miR-670-3p                                                       | 2 |
| <i>circDGKB</i> | miR-6715b-3p                                                     | 2 |
| <i>circDGKB</i> | miR-6723-5p                                                      | 2 |
| <i>circDGKB</i> | miR-6731-3p                                                      | 2 |
| <i>circDGKB</i> | miR-6758-3p                                                      | 2 |
| <i>circDGKB</i> | miR-6760-3p                                                      | 1 |
| <i>circDGKB</i> | miR-6809-3p                                                      | 1 |
| <i>circDGKB</i> | miR-6826-5p                                                      | 3 |
| <i>circDGKB</i> | miR-6845-3p                                                      | 2 |
| <i>circDGKB</i> | miR-6867-5p                                                      | 1 |
| <i>circDGKB</i> | miR-6868-3p                                                      | 1 |
| <i>circDGKB</i> | miR-6869-5p                                                      | 1 |
| <i>circDGKB</i> | miR-6882-5p                                                      | 2 |
| <i>circDGKB</i> | miR-6890-3p                                                      | 2 |
| <i>circDGKB</i> | miR-7109-3p                                                      | 2 |
| <i>circDGKB</i> | miR-7159-3p                                                      | 2 |
| <i>circDGKB</i> | miR-767-3p                                                       | 1 |
| <i>circDGKB</i> | miR-7844-5p                                                      | 2 |
| <i>circDGKB</i> | miR-7849-3p                                                      | 1 |
| <i>circDGKB</i> | miR-8055                                                         | 1 |

|                 |                      |   |
|-----------------|----------------------|---|
| <i>circDGKB</i> | miR-8078             | 1 |
| <i>circDGKB</i> | miR-942-5p           | 1 |
| <i>circDGKB</i> | miR-101-5p           | 1 |
| <i>circDGKB</i> | miR-215-3p           | 1 |
| <i>circDGKB</i> | miR-4424             | 1 |
| <i>circDGKB</i> | miR-6773-3p          | 1 |
| <i>circDGKH</i> | miR-101-3p.2         | 2 |
| <i>circDGKH</i> | miR-101-5p           | 1 |
| <i>circDGKH</i> | miR-1207-5p/4763-3p  | 1 |
| <i>circDGKH</i> | miR-122-3p           | 1 |
| <i>circDGKH</i> | miR-1229-3p          | 1 |
| <i>circDGKH</i> | miR-124-3p.1         | 1 |
| <i>circDGKH</i> | miR-1256             | 1 |
| <i>circDGKH</i> | miR-1273g-3p         | 3 |
| <i>circDGKH</i> | miR-1294             | 1 |
| <i>circDGKH</i> | miR-1304-3p          | 1 |
| <i>circDGKH</i> | miR-1324             | 1 |
| <i>circDGKH</i> | miR-141-3p/200-3p    | 1 |
| <i>circDGKH</i> | miR-146-5p           | 2 |
| <i>circDGKH</i> | miR-181-3p/4420      | 3 |
| <i>circDGKH</i> | miR-182-5p           | 3 |
| <i>circDGKH</i> | miR-1827             | 2 |
| <i>circDGKH</i> | miR-183-5p.2         | 3 |
| <i>circDGKH</i> | miR-19-5p            | 2 |
| <i>circDGKH</i> | miR-1910-3p/6511a-5p | 2 |
| <i>circDGKH</i> | miR-196b-3p          | 1 |
| <i>circDGKH</i> | miR-197-5p/3132      | 1 |
| <i>circDGKH</i> | miR-200c-5p/550a-3p  | 1 |
| <i>circDGKH</i> | miR-2052             | 2 |
| <i>circDGKH</i> | miR-20b-3p           | 1 |
| <i>circDGKH</i> | miR-2113             | 3 |
| <i>circDGKH</i> | miR-216b-3p          | 1 |
| <i>circDGKH</i> | miR-217              | 3 |
| <i>circDGKH</i> | miR-2277-3p          | 1 |
| <i>circDGKH</i> | miR-3065-3p          | 4 |
| <i>circDGKH</i> | miR-3120-3p          | 2 |
| <i>circDGKH</i> | miR-3130-3p          | 1 |
| <i>circDGKH</i> | miR-3134             | 1 |



|                 |                     |   |
|-----------------|---------------------|---|
| <i>circDGKH</i> | miR-3137            | 1 |
| <i>circDGKH</i> | miR-3157-3p         | 1 |
| <i>circDGKH</i> | miR-3166            | 1 |
| <i>circDGKH</i> | miR-34b-5p/449c-5p  | 2 |
| <i>circDGKH</i> | miR-3612            | 1 |
| <i>circDGKH</i> | miR-3614-5p         | 1 |
| <i>circDGKH</i> | miR-3665            | 1 |
| <i>circDGKH</i> | miR-3667-3p         | 1 |
| <i>circDGKH</i> | miR-3714            | 1 |
| <i>circDGKH</i> | miR-374-5p          | 1 |
| <i>circDGKH</i> | miR-375             | 3 |
| <i>circDGKH</i> | miR-383-3p          | 4 |
| <i>circDGKH</i> | miR-3910            | 1 |
| <i>circDGKH</i> | miR-4252            | 1 |
| <i>circDGKH</i> | miR-4269/6715b-5p   | 1 |
| <i>circDGKH</i> | miR-4289            | 1 |
| <i>circDGKH</i> | miR-4290            | 1 |
| <i>circDGKH</i> | miR-4299            | 1 |
| <i>circDGKH</i> | miR-4307            | 2 |
| <i>circDGKH</i> | miR-4316            | 1 |
| <i>circDGKH</i> | miR-4423-5p         | 1 |
| <i>circDGKH</i> | miR-4434/4516/5703  | 2 |
| <i>circDGKH</i> | miR-4438            | 1 |
| <i>circDGKH</i> | miR-4443            | 2 |
| <i>circDGKH</i> | miR-4456            | 1 |
| <i>circDGKH</i> | miR-4482-3p         | 1 |
| <i>circDGKH</i> | miR-4484            | 2 |
| <i>circDGKH</i> | miR-4514/4692       | 1 |
| <i>circDGKH</i> | miR-452-3p          | 2 |
| <i>circDGKH</i> | miR-4524b-3p        | 1 |
| <i>circDGKH</i> | miR-4534/8082       | 1 |
| <i>circDGKH</i> | miR-4540            | 1 |
| <i>circDGKH</i> | miR-4685-5p/6837-5p | 3 |
| <i>circDGKH</i> | miR-4699-3p         | 1 |
| <i>circDGKH</i> | miR-4710            | 1 |
| <i>circDGKH</i> | miR-4715-3p         | 1 |
| <i>circDGKH</i> | miR-4717-3p         | 1 |
| <i>circDGKH</i> | miR-4717-5p         | 1 |

|                 |                          |   |
|-----------------|--------------------------|---|
| <i>circDGKH</i> | miR-4729                 | 1 |
| <i>circDGKH</i> | miR-4736                 | 1 |
| <i>circDGKH</i> | miR-4742-5p              | 1 |
| <i>circDGKH</i> | miR-4755-3p              | 2 |
| <i>circDGKH</i> | miR-4769-3p/6817-5p      | 7 |
| <i>circDGKH</i> | miR-4771                 | 1 |
| <i>circDGKH</i> | miR-4773                 | 2 |
| <i>circDGKH</i> | miR-4792                 | 1 |
| <i>circDGKH</i> | miR-4793-3p              | 1 |
| <i>circDGKH</i> | miR-4802-5p              | 1 |
| <i>circDGKH</i> | miR-483-5p               | 1 |
| <i>circDGKH</i> | miR-486-5p               | 1 |
| <i>circDGKH</i> | miR-5008-5p              | 1 |
| <i>circDGKH</i> | miR-500a-5p              | 1 |
| <i>circDGKH</i> | miR-5010-3p              | 3 |
| <i>circDGKH</i> | miR-509-3-5p/509-5p/4418 | 3 |
| <i>circDGKH</i> | miR-5091                 | 1 |
| <i>circDGKH</i> | miR-5095/7151-3p         | 1 |
| <i>circDGKH</i> | miR-511-5p               | 1 |
| <i>circDGKH</i> | miR-513b-3p              | 1 |
| <i>circDGKH</i> | miR-548an                | 2 |
| <i>circDGKH</i> | miR-548q                 | 1 |
| <i>circDGKH</i> | miR-5589-3p              | 1 |
| <i>circDGKH</i> | miR-5691                 | 5 |
| <i>circDGKH</i> | miR-5739                 | 1 |
| <i>circDGKH</i> | miR-582-5p               | 2 |
| <i>circDGKH</i> | miR-589-5p               | 2 |
| <i>circDGKH</i> | miR-6089                 | 1 |
| <i>circDGKH</i> | miR-6500-3p              | 1 |
| <i>circDGKH</i> | miR-6501-5p              | 1 |
| <i>circDGKH</i> | miR-6514-5p              | 1 |
| <i>circDGKH</i> | miR-6515-5p              | 2 |
| <i>circDGKH</i> | miR-653-3p               | 3 |
| <i>circDGKH</i> | miR-656-5p               | 1 |
| <i>circDGKH</i> | miR-657                  | 1 |
| <i>circDGKH</i> | miR-6723-5p              | 1 |
| <i>circDGKH</i> | miR-6734-3p              | 1 |
| <i>circDGKH</i> | miR-6755-5p              | 1 |

|                 |                         |   |
|-----------------|-------------------------|---|
| <i>circDGKH</i> | miR-6757-3p             | 1 |
| <i>circDGKH</i> | miR-676-3p              | 1 |
| <i>circDGKH</i> | miR-676-5p              | 3 |
| <i>circDGKH</i> | miR-6765-5p             | 3 |
| <i>circDGKH</i> | miR-6767-5p             | 1 |
| <i>circDGKH</i> | miR-6768-3p             | 2 |
| <i>circDGKH</i> | miR-6785-3p             | 1 |
| <i>circDGKH</i> | miR-6786-3p             | 1 |
| <i>circDGKH</i> | miR-6823-5p             | 1 |
| <i>circDGKH</i> | miR-6834-3p             | 1 |
| <i>circDGKH</i> | miR-6841-5p             | 1 |
| <i>circDGKH</i> | miR-6868-3p             | 1 |
| <i>circDGKH</i> | miR-6890-3p             | 4 |
| <i>circDGKH</i> | miR-7113-5p             | 3 |
| <i>circDGKH</i> | miR-7159-3p             | 1 |
| <i>circDGKH</i> | miR-744-3p              | 1 |
| <i>circDGKH</i> | miR-758-3p              | 1 |
| <i>circDGKH</i> | miR-7855-5p             | 1 |
| <i>circDGKH</i> | miR-7978                | 1 |
| <i>circDGKH</i> | miR-8064                | 1 |
| <i>circDGKH</i> | miR-874-3p              | 1 |
| <i>circDGKH</i> | miR-890                 | 1 |
| <i>circDGKH</i> | miR-940/6808-5p/6893-5p | 2 |
| <i>circDGKH</i> | miR-96-5p/1271-5p       | 3 |
| <i>circDGKH</i> | miR-1-3p/206            | 3 |
| <i>circDGKH</i> | miR-100-3p              | 3 |
| <i>circDGKH</i> | miR-103-3p/107          | 4 |
| <i>circDGKH</i> | miR-103a-2-5p           | 2 |
| <i>circDGKH</i> | miR-103b                | 3 |
| <i>circDGKH</i> | miR-1184                | 5 |
| <i>circDGKH</i> | miR-1185-5p             | 1 |
| <i>circDGKH</i> | miR-1193                | 1 |
| <i>circDGKH</i> | miR-1202/3972           | 7 |
| <i>circDGKH</i> | miR-1204                | 3 |
| <i>circDGKH</i> | miR-1205                | 5 |
| <i>circDGKH</i> | miR-1206                | 3 |
| <i>circDGKH</i> | miR-1207-3p             | 8 |
| <i>circDGKH</i> | miR-1208                | 2 |

|                 |                          |   |
|-----------------|--------------------------|---|
| <i>circDGKH</i> | miR-122-5p               | 1 |
| <i>circDGKH</i> | miR-1224-3p              | 1 |
| <i>circDGKH</i> | miR-1224-5p              | 2 |
| <i>circDGKH</i> | miR-1226-3p              | 4 |
| <i>circDGKH</i> | miR-1226-5p              | 1 |
| <i>circDGKH</i> | miR-1227-5p              | 1 |
| <i>circDGKH</i> | miR-124-5p               | 2 |
| <i>circDGKH</i> | miR-1245b-3p             | 2 |
| <i>circDGKH</i> | miR-1245b-5p             | 1 |
| <i>circDGKH</i> | miR-1250-3p              | 6 |
| <i>circDGKH</i> | miR-1251-5p              | 1 |
| <i>circDGKH</i> | miR-1255b-2-3p           | 2 |
| <i>circDGKH</i> | miR-1262/4701-3p/6736-5p | 1 |
| <i>circDGKH</i> | miR-1263                 | 1 |
| <i>circDGKH</i> | miR-1269                 | 1 |
| <i>circDGKH</i> | miR-1273d                | 2 |
| <i>circDGKH</i> | miR-1273e                | 2 |
| <i>circDGKH</i> | miR-1273h-3p             | 1 |
| <i>circDGKH</i> | miR-1281                 | 1 |
| <i>circDGKH</i> | miR-1283                 | 2 |
| <i>circDGKH</i> | miR-1284                 | 2 |
| <i>circDGKH</i> | miR-1288-3p              | 3 |
| <i>circDGKH</i> | miR-129-5p               | 3 |
| <i>circDGKH</i> | miR-1290                 | 1 |
| <i>circDGKH</i> | miR-1291/6775-3p         | 1 |
| <i>circDGKH</i> | miR-1293/4483            | 1 |
| <i>circDGKH</i> | miR-1299                 | 4 |
| <i>circDGKH</i> | miR-130-3p/301-3p/454-3p | 1 |
| <i>circDGKH</i> | miR-1301-3p              | 4 |
| <i>circDGKH</i> | miR-1304-5p              | 3 |
| <i>circDGKH</i> | miR-1306-5p              | 1 |
| <i>circDGKH</i> | miR-132-3p/212-3p        | 3 |
| <i>circDGKH</i> | miR-1323                 | 2 |
| <i>circDGKH</i> | miR-133a-3p.1            | 1 |
| <i>circDGKH</i> | miR-134-3p               | 2 |
| <i>circDGKH</i> | miR-1343-3p              | 2 |
| <i>circDGKH</i> | miR-136-3p               | 1 |
| <i>circDGKH</i> | miR-138-2-3p             | 1 |

|                 |                                      |    |
|-----------------|--------------------------------------|----|
| <i>circDGKH</i> | miR-143-5p                           | 3  |
| <i>circDGKH</i> | miR-145-3p                           | 1  |
| <i>circDGKH</i> | miR-145-5p                           | 1  |
| <i>circDGKH</i> | miR-146b-3p                          | 1  |
| <i>circDGKH</i> | miR-148-3p/152-3p                    | 1  |
| <i>circDGKH</i> | miR-149-5p                           | 2  |
| <i>circDGKH</i> | miR-15-5p/16-5p/195-5p/424-5p/497-5p | 8  |
| <i>circDGKH</i> | miR-150-3p                           | 1  |
| <i>circDGKH</i> | miR-150-5p                           | 3  |
| <i>circDGKH</i> | miR-153-5p                           | 3  |
| <i>circDGKH</i> | miR-155-5p                           | 1  |
| <i>circDGKH</i> | miR-1587/3620-5p                     | 2  |
| <i>circDGKH</i> | miR-17-3p                            | 5  |
| <i>circDGKH</i> | miR-181a-3p                          | 1  |
| <i>circDGKH</i> | miR-183-5p.1                         | 1  |
| <i>circDGKH</i> | miR-190-5p                           | 1  |
| <i>circDGKH</i> | miR-1915-5p                          | 2  |
| <i>circDGKH</i> | miR-193-3p                           | 3  |
| <i>circDGKH</i> | miR-194-3p                           | 1  |
| <i>circDGKH</i> | miR-196a-3p                          | 3  |
| <i>circDGKH</i> | miR-1976                             | 2  |
| <i>circDGKH</i> | miR-198                              | 1  |
| <i>circDGKH</i> | miR-202-3p                           | 1  |
| <i>circDGKH</i> | miR-204-3p/4646-5p                   | 7  |
| <i>circDGKH</i> | miR-208-3p                           | 1  |
| <i>circDGKH</i> | miR-208-5p                           | 1  |
| <i>circDGKH</i> | miR-20a-3p                           | 4  |
| <i>circDGKH</i> | miR-21-5p/590-5p                     | 1  |
| <i>circDGKH</i> | miR-211-3p                           | 1  |
| <i>circDGKH</i> | miR-2114-3p                          | 1  |
| <i>circDGKH</i> | miR-2115-3p                          | 3  |
| <i>circDGKH</i> | miR-2116-3p                          | 3  |
| <i>circDGKH</i> | miR-214-3p/3619-5p                   | 10 |
| <i>circDGKH</i> | miR-219a-2-3p                        | 1  |
| <i>circDGKH</i> | miR-219b-3p                          | 1  |
| <i>circDGKH</i> | miR-219b-5p                          | 1  |
| <i>circDGKH</i> | miR-22-3p                            | 8  |
| <i>circDGKH</i> | miR-221-3p/222-3p                    | 2  |

|                 |                                              |   |
|-----------------|----------------------------------------------|---|
| <i>circDGKH</i> | miR-221-5p/8073                              | 1 |
| <i>circDGKH</i> | miR-23-3p                                    | 1 |
| <i>circDGKH</i> | miR-23-5p                                    | 2 |
| <i>circDGKH</i> | miR-2355-5p                                  | 2 |
| <i>circDGKH</i> | miR-24-3p                                    | 1 |
| <i>circDGKH</i> | miR-26-5p                                    | 3 |
| <i>circDGKH</i> | miR-2681-3p                                  | 1 |
| <i>circDGKH</i> | miR-2682-3p/6781-3p                          | 1 |
| <i>circDGKH</i> | miR-27b-5p                                   | 2 |
| <i>circDGKH</i> | miR-28-5p/708-5p                             | 1 |
| <i>circDGKH</i> | miR-29-3p                                    | 4 |
| <i>circDGKH</i> | miR-296-3p                                   | 2 |
| <i>circDGKH</i> | miR-296-5p                                   | 1 |
| <i>circDGKH</i> | miR-298                                      | 1 |
| <i>circDGKH</i> | miR-29b-1-5p                                 | 2 |
| <i>circDGKH</i> | miR-302a-5p                                  | 4 |
| <i>circDGKH</i> | miR-3064-5p                                  | 1 |
| <i>circDGKH</i> | miR-3074-5p                                  | 1 |
| <i>circDGKH</i> | miR-30b-3p/1273h-5p/3689-3p/6779-5p/6780a-5p | 3 |
| <i>circDGKH</i> | miR-30c-3p/6788-5p                           | 3 |
| <i>circDGKH</i> | miR-31-5p                                    | 1 |
| <i>circDGKH</i> | miR-3117-5p                                  | 1 |
| <i>circDGKH</i> | miR-3125/3916/6859-5p                        | 3 |
| <i>circDGKH</i> | miR-3128                                     | 1 |
| <i>circDGKH</i> | miR-3140-3p                                  | 1 |
| <i>circDGKH</i> | miR-3145-5p                                  | 2 |
| <i>circDGKH</i> | miR-3147                                     | 1 |
| <i>circDGKH</i> | miR-3149                                     | 1 |
| <i>circDGKH</i> | miR-3150a-5p/3150b-5p                        | 1 |
| <i>circDGKH</i> | miR-3151-5p                                  | 1 |
| <i>circDGKH</i> | miR-3158-5p                                  | 5 |
| <i>circDGKH</i> | miR-3159                                     | 1 |
| <i>circDGKH</i> | miR-3162-5p                                  | 1 |
| <i>circDGKH</i> | miR-3163                                     | 1 |
| <i>circDGKH</i> | miR-3170/6855-5p                             | 1 |
| <i>circDGKH</i> | miR-3173-3p/6891-5p                          | 1 |
| <i>circDGKH</i> | miR-3173-5p                                  | 1 |
| <i>circDGKH</i> | miR-3174                                     | 1 |

|                 |                       |    |
|-----------------|-----------------------|----|
| <i>circDGKH</i> | miR-3176/3922-3p      | 2  |
| <i>circDGKH</i> | miR-3180-5p           | 2  |
| <i>circDGKH</i> | miR-3181              | 1  |
| <i>circDGKH</i> | miR-3182              | 3  |
| <i>circDGKH</i> | miR-3187-3p           | 2  |
| <i>circDGKH</i> | miR-3189-5p           | 1  |
| <i>circDGKH</i> | miR-3190-5p           | 2  |
| <i>circDGKH</i> | miR-3192-3p           | 1  |
| <i>circDGKH</i> | miR-3192-5p           | 7  |
| <i>circDGKH</i> | miR-3193              | 4  |
| <i>circDGKH</i> | miR-3194-5p           | 5  |
| <i>circDGKH</i> | miR-3198/4309         | 1  |
| <i>circDGKH</i> | miR-32-3p             | 3  |
| <i>circDGKH</i> | miR-3200-5p           | 2  |
| <i>circDGKH</i> | miR-324-5p            | 1  |
| <i>circDGKH</i> | miR-326               | 1  |
| <i>circDGKH</i> | miR-328-3p            | 1  |
| <i>circDGKH</i> | miR-338-3p            | 13 |
| <i>circDGKH</i> | miR-340-5p            | 1  |
| <i>circDGKH</i> | miR-342-3p            | 1  |
| <i>circDGKH</i> | miR-342-5p/4664-5p    | 2  |
| <i>circDGKH</i> | miR-345-5p            | 1  |
| <i>circDGKH</i> | miR-34a-3p            | 1  |
| <i>circDGKH</i> | miR-34b-3p            | 1  |
| <i>circDGKH</i> | miR-34c-3p            | 1  |
| <i>circDGKH</i> | miR-3605-5p           | 1  |
| <i>circDGKH</i> | miR-3614-3p           | 1  |
| <i>circDGKH</i> | miR-3617-3p           | 1  |
| <i>circDGKH</i> | miR-3622a-3p/3622b-3p | 1  |
| <i>circDGKH</i> | miR-363-5p/6745       | 1  |
| <i>circDGKH</i> | miR-3653-5p           | 2  |
| <i>circDGKH</i> | miR-3659              | 1  |
| <i>circDGKH</i> | miR-3660/4526         | 3  |
| <i>circDGKH</i> | miR-3675-5p           | 1  |
| <i>circDGKH</i> | miR-3677-5p           | 1  |
| <i>circDGKH</i> | miR-3678-3p           | 1  |
| <i>circDGKH</i> | miR-3688-5p           | 3  |
| <i>circDGKH</i> | miR-3689d/6851-5p     | 3  |

|                 |                     |   |
|-----------------|---------------------|---|
| <i>circDGKH</i> | miR-3690            | 2 |
| <i>circDGKH</i> | miR-3692-5p         | 3 |
| <i>circDGKH</i> | miR-370-3p          | 4 |
| <i>circDGKH</i> | miR-376c-3p         | 1 |
| <i>circDGKH</i> | miR-378g            | 3 |
| <i>circDGKH</i> | miR-382-5p          | 3 |
| <i>circDGKH</i> | miR-3907            | 2 |
| <i>circDGKH</i> | miR-3912-5p         | 1 |
| <i>circDGKH</i> | miR-3913-3p         | 1 |
| <i>circDGKH</i> | miR-3915            | 2 |
| <i>circDGKH</i> | miR-3922-5p         | 1 |
| <i>circDGKH</i> | miR-3928-3p         | 4 |
| <i>circDGKH</i> | miR-3928-5p/6806-3p | 1 |
| <i>circDGKH</i> | miR-3934-3p         | 6 |
| <i>circDGKH</i> | miR-3942-3p         | 2 |
| <i>circDGKH</i> | miR-3944-3p         | 1 |
| <i>circDGKH</i> | miR-3944-5p         | 3 |
| <i>circDGKH</i> | miR-3945            | 2 |
| <i>circDGKH</i> | miR-3974            | 1 |
| <i>circDGKH</i> | miR-3977            | 1 |
| <i>circDGKH</i> | miR-410-3p          | 1 |
| <i>circDGKH</i> | miR-425-5p          | 2 |
| <i>circDGKH</i> | miR-4253/6862-5p    | 2 |
| <i>circDGKH</i> | miR-4254            | 2 |
| <i>circDGKH</i> | miR-4255            | 1 |
| <i>circDGKH</i> | miR-4256            | 1 |
| <i>circDGKH</i> | miR-4257            | 2 |
| <i>circDGKH</i> | miR-4259            | 1 |
| <i>circDGKH</i> | miR-4264            | 1 |
| <i>circDGKH</i> | miR-4265/4296/4322  | 2 |
| <i>circDGKH</i> | miR-4267            | 1 |
| <i>circDGKH</i> | miR-4272            | 1 |
| <i>circDGKH</i> | miR-4274            | 2 |
| <i>circDGKH</i> | miR-4276            | 1 |
| <i>circDGKH</i> | miR-4279            | 1 |
| <i>circDGKH</i> | miR-4282            | 1 |
| <i>circDGKH</i> | miR-4284            | 1 |
| <i>circDGKH</i> | miR-4286            | 1 |



|                 |                       |    |
|-----------------|-----------------------|----|
| <i>circDGKH</i> | miR-4301              | 1  |
| <i>circDGKH</i> | miR-4303              | 2  |
| <i>circDGKH</i> | miR-4304              | 2  |
| <i>circDGKH</i> | miR-431-5p            | 1  |
| <i>circDGKH</i> | miR-4312              | 2  |
| <i>circDGKH</i> | miR-4314              | 2  |
| <i>circDGKH</i> | miR-4328              | 6  |
| <i>circDGKH</i> | miR-4417              | 1  |
| <i>circDGKH</i> | miR-4421/5699-3p      | 1  |
| <i>circDGKH</i> | miR-4425              | 1  |
| <i>circDGKH</i> | miR-4426/4647/4662b   | 1  |
| <i>circDGKH</i> | miR-4428              | 1  |
| <i>circDGKH</i> | miR-4433a-3p          | 1  |
| <i>circDGKH</i> | miR-4435              | 2  |
| <i>circDGKH</i> | miR-4437              | 1  |
| <i>circDGKH</i> | miR-4447/4472         | 1  |
| <i>circDGKH</i> | miR-4455              | 1  |
| <i>circDGKH</i> | miR-4457              | 1  |
| <i>circDGKH</i> | miR-4459              | 1  |
| <i>circDGKH</i> | miR-4461              | 4  |
| <i>circDGKH</i> | miR-4464/4748         | 3  |
| <i>circDGKH</i> | miR-4476/6876-5p      | 3  |
| <i>circDGKH</i> | miR-4480              | 2  |
| <i>circDGKH</i> | miR-4485-3p           | 3  |
| <i>circDGKH</i> | miR-4486              | 3  |
| <i>circDGKH</i> | miR-4502              | 1  |
| <i>circDGKH</i> | miR-4506              | 2  |
| <i>circDGKH</i> | miR-4511              | 1  |
| <i>circDGKH</i> | miR-4515              | 3  |
| <i>circDGKH</i> | miR-4519              | 2  |
| <i>circDGKH</i> | miR-452-5p/892-3p     | 1  |
| <i>circDGKH</i> | miR-4527/6503-5p      | 1  |
| <i>circDGKH</i> | miR-4528              | 1  |
| <i>circDGKH</i> | miR-4530              | 13 |
| <i>circDGKH</i> | miR-4536-3p           | 1  |
| <i>circDGKH</i> | miR-455-3p.2          | 3  |
| <i>circDGKH</i> | miR-4649-3p           | 2  |
| <i>circDGKH</i> | miR-4659a-3p/4659b-3p | 2  |

|                 |                             |   |
|-----------------|-----------------------------|---|
| <i>circDGKH</i> | miR-4660                    | 6 |
| <i>circDGKH</i> | miR-4661-3p                 | 4 |
| <i>circDGKH</i> | miR-4661-5p                 | 1 |
| <i>circDGKH</i> | miR-4662a-3p                | 1 |
| <i>circDGKH</i> | miR-4666b                   | 2 |
| <i>circDGKH</i> | miR-4670-3p                 | 1 |
| <i>circDGKH</i> | miR-4674                    | 2 |
| <i>circDGKH</i> | miR-4680-5p                 | 3 |
| <i>circDGKH</i> | miR-4682                    | 1 |
| <i>circDGKH</i> | miR-4684-3p                 | 1 |
| <i>circDGKH</i> | miR-4684-5p                 | 1 |
| <i>circDGKH</i> | miR-4687-3p                 | 1 |
| <i>circDGKH</i> | miR-4689/6858-5p            | 2 |
| <i>circDGKH</i> | miR-4691-3p                 | 4 |
| <i>circDGKH</i> | miR-4695-5p                 | 1 |
| <i>circDGKH</i> | miR-4699-5p                 | 1 |
| <i>circDGKH</i> | miR-4708-3p                 | 1 |
| <i>circDGKH</i> | miR-4711-5p                 | 1 |
| <i>circDGKH</i> | miR-4714-3p                 | 1 |
| <i>circDGKH</i> | miR-4715-5p                 | 1 |
| <i>circDGKH</i> | miR-4719                    | 2 |
| <i>circDGKH</i> | miR-4720-3p                 | 1 |
| <i>circDGKH</i> | miR-4720-5p/4799-3p/5588-5p | 1 |
| <i>circDGKH</i> | miR-4728-3p                 | 2 |
| <i>circDGKH</i> | miR-4731-5p                 | 3 |
| <i>circDGKH</i> | miR-4733-3p                 | 4 |
| <i>circDGKH</i> | miR-4740-5p                 | 3 |
| <i>circDGKH</i> | miR-4747-5p/5196-5p         | 2 |
| <i>circDGKH</i> | miR-4750-5p                 | 1 |
| <i>circDGKH</i> | miR-4753-5p                 | 1 |
| <i>circDGKH</i> | miR-4758-3p                 | 1 |
| <i>circDGKH</i> | miR-4761-5p                 | 2 |
| <i>circDGKH</i> | miR-4762-3p                 | 2 |
| <i>circDGKH</i> | miR-4766-5p                 | 1 |
| <i>circDGKH</i> | miR-4768-3p                 | 1 |
| <i>circDGKH</i> | miR-4768-5p/6833-3p         | 1 |
| <i>circDGKH</i> | miR-4779                    | 1 |
| <i>circDGKH</i> | miR-4782-5p/5706            | 4 |

|                 |                     |   |
|-----------------|---------------------|---|
| <i>circDGKH</i> | miR-4790-3p         | 2 |
| <i>circDGKH</i> | miR-4793-5p         | 2 |
| <i>circDGKH</i> | miR-4796-3p         | 1 |
| <i>circDGKH</i> | miR-4797-3p         | 1 |
| <i>circDGKH</i> | miR-4797-5p         | 1 |
| <i>circDGKH</i> | miR-4802-3p         | 1 |
| <i>circDGKH</i> | miR-4804-3p         | 1 |
| <i>circDGKH</i> | miR-483-3p.2        | 1 |
| <i>circDGKH</i> | miR-486-3p          | 1 |
| <i>circDGKH</i> | miR-488-5p          | 1 |
| <i>circDGKH</i> | miR-489-3p          | 1 |
| <i>circDGKH</i> | miR-490-5p          | 1 |
| <i>circDGKH</i> | miR-491-5p          | 1 |
| <i>circDGKH</i> | miR-494-3p          | 1 |
| <i>circDGKH</i> | miR-495-5p          | 3 |
| <i>circDGKH</i> | miR-498             | 1 |
| <i>circDGKH</i> | miR-499a-3p/499b-3p | 2 |
| <i>circDGKH</i> | miR-499a-5p         | 1 |
| <i>circDGKH</i> | miR-5000-5p         | 1 |
| <i>circDGKH</i> | miR-5006-5p         | 7 |
| <i>circDGKH</i> | miR-5007-3p         | 4 |
| <i>circDGKH</i> | miR-5009-5p/8058    | 1 |
| <i>circDGKH</i> | miR-500b-3p         | 2 |
| <i>circDGKH</i> | miR-5011-3p         | 2 |
| <i>circDGKH</i> | miR-503-5p          | 8 |
| <i>circDGKH</i> | miR-504-3p          | 2 |
| <i>circDGKH</i> | miR-505-3p.1        | 1 |
| <i>circDGKH</i> | miR-508-5p          | 2 |
| <i>circDGKH</i> | miR-5093            | 1 |
| <i>circDGKH</i> | miR-5096            | 4 |
| <i>circDGKH</i> | miR-5100            | 2 |
| <i>circDGKH</i> | miR-513b-5p         | 2 |
| <i>circDGKH</i> | miR-516b-5p         | 4 |
| <i>circDGKH</i> | miR-517-5p          | 1 |
| <i>circDGKH</i> | miR-518c-5p         | 1 |
| <i>circDGKH</i> | miR-5190            | 1 |
| <i>circDGKH</i> | miR-5196-3p         | 2 |
| <i>circDGKH</i> | miR-5197-3p         | 1 |

|                 |                                       |   |
|-----------------|---------------------------------------|---|
| <i>circDGKH</i> | miR-525-5p                            | 1 |
| <i>circDGKH</i> | miR-532-3p                            | 3 |
| <i>circDGKH</i> | miR-539-3p                            | 1 |
| <i>circDGKH</i> | miR-543                               | 4 |
| <i>circDGKH</i> | miR-548al/4445-3p                     | 3 |
| <i>circDGKH</i> | miR-548ao-5p/548ax                    | 2 |
| <i>circDGKH</i> | miR-548ap-3p/548aa/548t-3p            | 1 |
| <i>circDGKH</i> | miR-548as-3p                          | 1 |
| <i>circDGKH</i> | miR-548ay-3p/548at-3p                 | 1 |
| <i>circDGKH</i> | miR-548b-3p                           | 1 |
| <i>circDGKH</i> | miR-548s                              | 2 |
| <i>circDGKH</i> | miR-548v                              | 2 |
| <i>circDGKH</i> | miR-5571-5p                           | 4 |
| <i>circDGKH</i> | miR-5580-5p                           | 2 |
| <i>circDGKH</i> | miR-5584-5p                           | 1 |
| <i>circDGKH</i> | miR-5585-5p                           | 2 |
| <i>circDGKH</i> | miR-5589-5p                           | 3 |
| <i>circDGKH</i> | miR-5591-3p                           | 1 |
| <i>circDGKH</i> | miR-562                               | 1 |
| <i>circDGKH</i> | miR-568                               | 1 |
| <i>circDGKH</i> | miR-5690                              | 1 |
| <i>circDGKH</i> | miR-5693                              | 1 |
| <i>circDGKH</i> | miR-5696                              | 3 |
| <i>circDGKH</i> | miR-5699-5p                           | 1 |
| <i>circDGKH</i> | miR-574-5p                            | 1 |
| <i>circDGKH</i> | miR-575/4676-5p                       | 3 |
| <i>circDGKH</i> | miR-579-3p                            | 3 |
| <i>circDGKH</i> | miR-582-3p                            | 1 |
| <i>circDGKH</i> | miR-584-3p                            | 4 |
| <i>circDGKH</i> | miR-587                               | 1 |
| <i>circDGKH</i> | miR-588                               | 2 |
| <i>circDGKH</i> | miR-589-3p                            | 2 |
| <i>circDGKH</i> | miR-597-5p                            | 1 |
| <i>circDGKH</i> | miR-6079                              | 1 |
| <i>circDGKH</i> | miR-608/4651                          | 2 |
| <i>circDGKH</i> | miR-609                               | 1 |
| <i>circDGKH</i> | miR-612/1285-3p/3187-5p/5189-5p/68603 | 3 |
| <i>circDGKH</i> | miR-6128                              | 1 |

|                 |                             |   |
|-----------------|-----------------------------|---|
| <i>circDGKH</i> | miR-6134                    | 2 |
| <i>circDGKH</i> | miR-616-3p                  | 3 |
| <i>circDGKH</i> | miR-619-5p/6506-5p          | 7 |
| <i>circDGKH</i> | miR-624-3p                  | 1 |
| <i>circDGKH</i> | miR-627-3p                  | 2 |
| <i>circDGKH</i> | miR-627-5p                  | 2 |
| <i>circDGKH</i> | miR-628-5p                  | 1 |
| <i>circDGKH</i> | miR-634                     | 4 |
| <i>circDGKH</i> | miR-641/3617-5p             | 1 |
| <i>circDGKH</i> | miR-642b-5p                 | 1 |
| <i>circDGKH</i> | miR-643                     | 2 |
| <i>circDGKH</i> | miR-646                     | 8 |
| <i>circDGKH</i> | miR-647                     | 2 |
| <i>circDGKH</i> | miR-6499-3p                 | 1 |
| <i>circDGKH</i> | miR-6507-5p                 | 1 |
| <i>circDGKH</i> | miR-653-5p                  | 2 |
| <i>circDGKH</i> | miR-663b                    | 1 |
| <i>circDGKH</i> | miR-664a-5p/4794            | 2 |
| <i>circDGKH</i> | miR-671-5p                  | 1 |
| <i>circDGKH</i> | miR-6715b-3p                | 1 |
| <i>circDGKH</i> | miR-6716-5p                 | 4 |
| <i>circDGKH</i> | miR-6719-3p                 | 3 |
| <i>circDGKH</i> | miR-6724-5p/6773-5p         | 1 |
| <i>circDGKH</i> | miR-6730-3p                 | 3 |
| <i>circDGKH</i> | miR-6731-5p/8085            | 2 |
| <i>circDGKH</i> | miR-6734-5p                 | 1 |
| <i>circDGKH</i> | miR-6735-3p                 | 1 |
| <i>circDGKH</i> | miR-6736-3p                 | 5 |
| <i>circDGKH</i> | miR-6737-5p/6812-5p/6819-5p | 1 |
| <i>circDGKH</i> | miR-6740-3p                 | 1 |
| <i>circDGKH</i> | miR-6741-5p                 | 1 |
| <i>circDGKH</i> | miR-6742-5p                 | 1 |
| <i>circDGKH</i> | miR-6747-5p                 | 2 |
| <i>circDGKH</i> | miR-6748-3p                 | 1 |
| <i>circDGKH</i> | miR-6750-5p/6822-5p         | 1 |
| <i>circDGKH</i> | miR-6752-3p                 | 1 |
| <i>circDGKH</i> | miR-6753-3p/7107-3p         | 1 |
| <i>circDGKH</i> | miR-6753-5p                 | 2 |

|                 |                     |   |
|-----------------|---------------------|---|
| <i>circDGKH</i> | miR-6756-5p/6766-5p | 1 |
| <i>circDGKH</i> | miR-6759-5p         | 2 |
| <i>circDGKH</i> | miR-6760-3p         | 2 |
| <i>circDGKH</i> | miR-6764-3p/6824-3p | 1 |
| <i>circDGKH</i> | miR-6765-3p         | 1 |
| <i>circDGKH</i> | miR-6771-3p         | 1 |
| <i>circDGKH</i> | miR-6772-5p         | 1 |
| <i>circDGKH</i> | miR-6776-3p         | 1 |
| <i>circDGKH</i> | miR-6776-5p         | 1 |
| <i>circDGKH</i> | miR-6778-3p         | 2 |
| <i>circDGKH</i> | miR-6787-3p         | 5 |
| <i>circDGKH</i> | miR-6791-3p/6829-3p | 2 |
| <i>circDGKH</i> | miR-6796-3p         | 1 |
| <i>circDGKH</i> | miR-6796-5p         | 2 |
| <i>circDGKH</i> | miR-6804-5p         | 1 |
| <i>circDGKH</i> | miR-6809-3p         | 1 |
| <i>circDGKH</i> | miR-6809-5p         | 1 |
| <i>circDGKH</i> | miR-6819-3p/6877-3p | 1 |
| <i>circDGKH</i> | miR-6827-5p         | 5 |
| <i>circDGKH</i> | miR-6828-5p         | 1 |
| <i>circDGKH</i> | miR-6830-3p         | 2 |
| <i>circDGKH</i> | miR-6830-5p         | 2 |
| <i>circDGKH</i> | miR-6834-5p         | 1 |
| <i>circDGKH</i> | miR-6838-3p         | 4 |
| <i>circDGKH</i> | miR-6841-3p         | 2 |
| <i>circDGKH</i> | miR-6842-3p         | 2 |
| <i>circDGKH</i> | miR-6847-5p         | 2 |
| <i>circDGKH</i> | miR-6849-3p         | 1 |
| <i>circDGKH</i> | miR-6851-3p         | 1 |
| <i>circDGKH</i> | miR-6853-3p         | 3 |
| <i>circDGKH</i> | miR-6853-5p         | 3 |
| <i>circDGKH</i> | miR-6854-5p         | 6 |
| <i>circDGKH</i> | miR-6858-3p         | 3 |
| <i>circDGKH</i> | miR-6861-5p         | 1 |
| <i>circDGKH</i> | miR-6863            | 1 |
| <i>circDGKH</i> | miR-6868-5p         | 1 |
| <i>circDGKH</i> | miR-6871-3p         | 4 |
| <i>circDGKH</i> | miR-6871-5p         | 1 |

|                 |             |    |
|-----------------|-------------|----|
| <i>circDGKH</i> | miR-6875-3p | 2  |
| <i>circDGKH</i> | miR-6878-3p | 1  |
| <i>circDGKH</i> | miR-6878-5p | 2  |
| <i>circDGKH</i> | miR-6882-3p | 6  |
| <i>circDGKH</i> | miR-6890-5p | 1  |
| <i>circDGKH</i> | miR-7-3p    | 1  |
| <i>circDGKH</i> | miR-708-3p  | 1  |
| <i>circDGKH</i> | miR-7112-3p | 1  |
| <i>circDGKH</i> | miR-7112-5p | 2  |
| <i>circDGKH</i> | miR-7114-5p | 2  |
| <i>circDGKH</i> | miR-7150    | 2  |
| <i>circDGKH</i> | miR-7152-5p | 1  |
| <i>circDGKH</i> | miR-7156-3p | 4  |
| <i>circDGKH</i> | miR-7162-3p | 2  |
| <i>circDGKH</i> | miR-767-5p  | 7  |
| <i>circDGKH</i> | miR-770-5p  | 7  |
| <i>circDGKH</i> | miR-7854-3p | 2  |
| <i>circDGKH</i> | miR-7974    | 1  |
| <i>circDGKH</i> | miR-7976    | 1  |
| <i>circDGKH</i> | miR-7977    | 4  |
| <i>circDGKH</i> | miR-8055    | 1  |
| <i>circDGKH</i> | miR-8057    | 1  |
| <i>circDGKH</i> | miR-8069    | 2  |
| <i>circDGKH</i> | miR-8081    | 2  |
| <i>circDGKH</i> | miR-873-3p  | 1  |
| <i>circDGKH</i> | miR-874-5p  | 1  |
| <i>circDGKH</i> | miR-875-3p  | 1  |
| <i>circDGKH</i> | miR-876-5p  | 1  |
| <i>circDGKH</i> | miR-885-3p  | 3  |
| <i>circDGKH</i> | miR-891a-3p | 3  |
| <i>circDGKH</i> | miR-891a-5p | 1  |
| <i>circDGKH</i> | miR-891b    | 1  |
| <i>circDGKH</i> | miR-9-5p    | 2  |
| <i>circDGKH</i> | miR-922     | 10 |
| <i>circDGKH</i> | miR-924     | 2  |
| <i>circDGKH</i> | miR-93-3p   | 3  |
| <i>circDGKH</i> | miR-935     | 1  |
| <i>circDGKH</i> | miR-937-5p  | 2  |

|                 |                                    |   |
|-----------------|------------------------------------|---|
| <i>circDGKH</i> | miR-942-5p                         | 1 |
| <i>circDGKH</i> | miR-9500                           | 1 |
| <i>circDGKH</i> | miR-96-3p                          | 1 |
| <i>circDGKH</i> | miR-99-3p                          | 1 |
| <i>circDGKH</i> | miR-1180-3p                        | 1 |
| <i>circDGKH</i> | miR-1236-3p                        | 2 |
| <i>circDGKH</i> | miR-1238-3p                        | 2 |
| <i>circDGKH</i> | miR-1243                           | 1 |
| <i>circDGKH</i> | miR-1254/3116                      | 2 |
| <i>circDGKH</i> | miR-1295b-5p/1912                  | 1 |
| <i>circDGKH</i> | miR-130b-5p                        | 3 |
| <i>circDGKH</i> | miR-133a-5p                        | 1 |
| <i>circDGKH</i> | miR-138-5p                         | 1 |
| <i>circDGKH</i> | miR-139-5p                         | 1 |
| <i>circDGKH</i> | miR-140-3p.1                       | 2 |
| <i>circDGKH</i> | miR-141-5p                         | 2 |
| <i>circDGKH</i> | miR-142-5p                         | 2 |
| <i>circDGKH</i> | miR-147a                           | 1 |
| <i>circDGKH</i> | miR-149-3p/4728-5p/6785-5p/6883-5p | 2 |
| <i>circDGKH</i> | miR-182-3p                         | 1 |
| <i>circDGKH</i> | miR-185-3p                         | 2 |
| <i>circDGKH</i> | miR-19-3p                          | 1 |
| <i>circDGKH</i> | miR-1915-3p/6764-5p                | 1 |
| <i>circDGKH</i> | miR-203b-3p                        | 1 |
| <i>circDGKH</i> | miR-204-5p/211-5p                  | 2 |
| <i>circDGKH</i> | miR-2115-5p                        | 2 |
| <i>circDGKH</i> | miR-212-5p                         | 1 |
| <i>circDGKH</i> | miR-215-3p                         | 1 |
| <i>circDGKH</i> | miR-218-1-3p                       | 1 |
| <i>circDGKH</i> | miR-218-2-3p                       | 1 |
| <i>circDGKH</i> | miR-218-5p                         | 3 |
| <i>circDGKH</i> | miR-27-3p                          | 1 |
| <i>circDGKH</i> | miR-29a-5p                         | 2 |
| <i>circDGKH</i> | miR-29b-2-5p                       | 2 |
| <i>circDGKH</i> | miR-302b-5p/302d-5p                | 1 |
| <i>circDGKH</i> | miR-3117-3p                        | 1 |
| <i>circDGKH</i> | miR-3119                           | 1 |
| <i>circDGKH</i> | miR-3130-5p/4482-5p                | 1 |



|                 |                       |   |
|-----------------|-----------------------|---|
| <i>circDGKH</i> | miR-3152-5p           | 2 |
| <i>circDGKH</i> | miR-3158-3p           | 1 |
| <i>circDGKH</i> | miR-3160-5p           | 3 |
| <i>circDGKH</i> | miR-3169              | 3 |
| <i>circDGKH</i> | miR-3189-3p           | 1 |
| <i>circDGKH</i> | miR-3199/8052         | 2 |
| <i>circDGKH</i> | miR-3202              | 1 |
| <i>circDGKH</i> | miR-320e              | 2 |
| <i>circDGKH</i> | miR-330-3p            | 1 |
| <i>circDGKH</i> | miR-3616-3p           | 1 |
| <i>circDGKH</i> | miR-3654              | 1 |
| <i>circDGKH</i> | miR-365a-5p/365b-5p   | 2 |
| <i>circDGKH</i> | miR-3692-3p           | 3 |
| <i>circDGKH</i> | miR-376a-2-5p         | 1 |
| <i>circDGKH</i> | miR-376a-5p           | 1 |
| <i>circDGKH</i> | miR-378-3p            | 2 |
| <i>circDGKH</i> | miR-3920              | 1 |
| <i>circDGKH</i> | miR-3937              | 1 |
| <i>circDGKH</i> | miR-412-3p/6754-3p    | 2 |
| <i>circDGKH</i> | miR-4270/4441/6754-5p | 4 |
| <i>circDGKH</i> | miR-4293              | 3 |
| <i>circDGKH</i> | miR-4310/7157-5p      | 2 |
| <i>circDGKH</i> | miR-4446-3p           | 1 |
| <i>circDGKH</i> | miR-4446-5p           | 1 |
| <i>circDGKH</i> | miR-4513/6855-3p      | 2 |
| <i>circDGKH</i> | miR-4522              | 1 |
| <i>circDGKH</i> | miR-4533              | 1 |
| <i>circDGKH</i> | miR-4539              | 2 |
| <i>circDGKH</i> | miR-4638-3p           | 2 |
| <i>circDGKH</i> | miR-4652-3p           | 2 |
| <i>circDGKH</i> | miR-4656              | 1 |
| <i>circDGKH</i> | miR-466               | 1 |
| <i>circDGKH</i> | miR-4663              | 1 |
| <i>circDGKH</i> | miR-4664-3p           | 1 |
| <i>circDGKH</i> | miR-4675/4741         | 1 |
| <i>circDGKH</i> | miR-4691-5p/6792-3p   | 1 |
| <i>circDGKH</i> | miR-4707-3p           | 1 |
| <i>circDGKH</i> | miR-4712-3p           | 1 |

|                 |                             |   |
|-----------------|-----------------------------|---|
| <i>circDGKH</i> | miR-4721                    | 1 |
| <i>circDGKH</i> | miR-4724-5p                 | 1 |
| <i>circDGKH</i> | miR-4726-3p                 | 1 |
| <i>circDGKH</i> | miR-4739                    | 2 |
| <i>circDGKH</i> | miR-4743-3p                 | 2 |
| <i>circDGKH</i> | miR-4751                    | 1 |
| <i>circDGKH</i> | miR-4755-5p/5006-3p         | 1 |
| <i>circDGKH</i> | miR-4759                    | 3 |
| <i>circDGKH</i> | miR-4760-5p/8061            | 1 |
| <i>circDGKH</i> | miR-4763-5p                 | 1 |
| <i>circDGKH</i> | miR-4774-3p                 | 2 |
| <i>circDGKH</i> | miR-4778-3p                 | 1 |
| <i>circDGKH</i> | miR-4780                    | 3 |
| <i>circDGKH</i> | miR-4804-5p                 | 1 |
| <i>circDGKH</i> | miR-493-3p                  | 1 |
| <i>circDGKH</i> | miR-5003-3p                 | 1 |
| <i>circDGKH</i> | miR-5004-5p                 | 1 |
| <i>circDGKH</i> | miR-5008-3p/6737-3p/7157-3p | 1 |
| <i>circDGKH</i> | miR-5087                    | 1 |
| <i>circDGKH</i> | miR-5088-5p                 | 1 |
| <i>circDGKH</i> | miR-513a-5p                 | 1 |
| <i>circDGKH</i> | miR-516a-3p/516b-3p/7162-5p | 2 |
| <i>circDGKH</i> | miR-518a-5p/527             | 1 |
| <i>circDGKH</i> | miR-5193                    | 1 |
| <i>circDGKH</i> | miR-548aw                   | 1 |
| <i>circDGKH</i> | miR-5579-3p                 | 1 |
| <i>circDGKH</i> | miR-593-5p                  | 3 |
| <i>circDGKH</i> | miR-596                     | 3 |
| <i>circDGKH</i> | miR-598-3p                  | 1 |
| <i>circDGKH</i> | miR-6131                    | 1 |
| <i>circDGKH</i> | miR-623                     | 2 |
| <i>circDGKH</i> | miR-626/6876-3p             | 1 |
| <i>circDGKH</i> | miR-651-5p                  | 1 |
| <i>circDGKH</i> | miR-6515-3p                 | 2 |
| <i>circDGKH</i> | miR-659-3p                  | 1 |
| <i>circDGKH</i> | miR-660-3p                  | 1 |
| <i>circDGKH</i> | miR-661                     | 2 |
| <i>circDGKH</i> | miR-664a-3p                 | 2 |

|                 |                           |   |
|-----------------|---------------------------|---|
| <i>circDGKH</i> | miR-670-3p                | 2 |
| <i>circDGKH</i> | miR-6722-5p               | 1 |
| <i>circDGKH</i> | miR-6729-3p               | 1 |
| <i>circDGKH</i> | miR-6739-3p               | 3 |
| <i>circDGKH</i> | miR-6742-3p               | 3 |
| <i>circDGKH</i> | miR-6749-3p               | 1 |
| <i>circDGKH</i> | miR-6760-5p               | 2 |
| <i>circDGKH</i> | miR-6773-3p               | 1 |
| <i>circDGKH</i> | miR-6780b-3p              | 3 |
| <i>circDGKH</i> | miR-6782-5p               | 1 |
| <i>circDGKH</i> | miR-6793-3p               | 2 |
| <i>circDGKH</i> | miR-6798-5p               | 1 |
| <i>circDGKH</i> | miR-6799-5p               | 2 |
| <i>circDGKH</i> | miR-6802-3p               | 1 |
| <i>circDGKH</i> | miR-6814-5p               | 2 |
| <i>circDGKH</i> | miR-6815-3p               | 1 |
| <i>circDGKH</i> | miR-6818-5p               | 1 |
| <i>circDGKH</i> | miR-6829-5p               | 1 |
| <i>circDGKH</i> | miR-6836-3p               | 2 |
| <i>circDGKH</i> | miR-6837-3p               | 2 |
| <i>circDGKH</i> | miR-6840-3p               | 1 |
| <i>circDGKH</i> | miR-6844                  | 3 |
| <i>circDGKH</i> | miR-6852-5p               | 3 |
| <i>circDGKH</i> | miR-6857-3p               | 2 |
| <i>circDGKH</i> | miR-6873-5p               | 1 |
| <i>circDGKH</i> | miR-6884-3p               | 2 |
| <i>circDGKH</i> | miR-6885-3p               | 2 |
| <i>circDGKH</i> | miR-6889-3p               | 1 |
| <i>circDGKH</i> | miR-6894-5p               | 1 |
| <i>circDGKH</i> | miR-7106-5p               | 2 |
| <i>circDGKH</i> | miR-7109-3p               | 1 |
| <i>circDGKH</i> | miR-7151-5p               | 2 |
| <i>circDGKH</i> | miR-7154-3p               | 1 |
| <i>circDGKH</i> | miR-7158-3p               | 1 |
| <i>circDGKH</i> | miR-7160-5p               | 1 |
| <i>circDGKH</i> | miR-762/4492/4498/5001-5p | 1 |
| <i>circDGKH</i> | miR-765                   | 1 |
| <i>circDGKH</i> | miR-766-5p                | 1 |

|                 |                       |   |
|-----------------|-----------------------|---|
| <i>circDGKH</i> | miR-767-3p            | 3 |
| <i>circDGKH</i> | miR-7844-5p           | 2 |
| <i>circDGKH</i> | miR-7845-5p           | 2 |
| <i>circDGKH</i> | miR-8077              | 1 |
| <i>circDGKH</i> | miR-8083              | 3 |
| <i>circDGKH</i> | miR-939-3p            | 3 |
| <i>circDGKH</i> | let-7a-2-3p/let-7g-3p | 1 |
| <i>circDGKH</i> | let-7c-3p             | 1 |
| <i>circDGKH</i> | miR-105-5p            | 1 |
| <i>circDGKH</i> | miR-1179              | 1 |
| <i>circDGKH</i> | miR-1183              | 1 |
| <i>circDGKH</i> | miR-1245a/8079        | 1 |
| <i>circDGKH</i> | miR-1246              | 1 |
| <i>circDGKH</i> | miR-125b-1-3p         | 1 |
| <i>circDGKH</i> | miR-125b-2-3p         | 1 |
| <i>circDGKH</i> | miR-126-5p            | 3 |
| <i>circDGKH</i> | miR-1261              | 1 |
| <i>circDGKH</i> | miR-1265              | 1 |
| <i>circDGKH</i> | miR-1267              | 1 |
| <i>circDGKH</i> | miR-1270              | 1 |
| <i>circDGKH</i> | miR-1272              | 1 |
| <i>circDGKH</i> | miR-1273c             | 1 |
| <i>circDGKH</i> | miR-1277-5p           | 3 |
| <i>circDGKH</i> | miR-1287-5p           | 1 |
| <i>circDGKH</i> | miR-1298-3p           | 1 |
| <i>circDGKH</i> | miR-1302/4298         | 1 |
| <i>circDGKH</i> | miR-1322              | 1 |
| <i>circDGKH</i> | miR-136-5p            | 1 |
| <i>circDGKH</i> | miR-137               | 1 |
| <i>circDGKH</i> | miR-140-3p.2          | 1 |
| <i>circDGKH</i> | miR-142-3p.2          | 1 |
| <i>circDGKH</i> | miR-152-5p            | 1 |
| <i>circDGKH</i> | miR-15a-3p            | 1 |
| <i>circDGKH</i> | miR-15b-3p            | 3 |
| <i>circDGKH</i> | miR-183-3p            | 1 |
| <i>circDGKH</i> | miR-188-5p            | 1 |
| <i>circDGKH</i> | miR-18a-3p            | 1 |
| <i>circDGKH</i> | miR-1909-5p           | 1 |

|                 |                           |   |
|-----------------|---------------------------|---|
| <i>circDGKH</i> | miR-1910-5p               | 2 |
| <i>circDGKH</i> | miR-192-3p                | 1 |
| <i>circDGKH</i> | miR-194-5p                | 2 |
| <i>circDGKH</i> | miR-197-3p                | 2 |
| <i>circDGKH</i> | miR-205-3p                | 2 |
| <i>circDGKH</i> | miR-2054                  | 1 |
| <i>circDGKH</i> | miR-2116-5p               | 1 |
| <i>circDGKH</i> | miR-22-5p                 | 1 |
| <i>circDGKH</i> | miR-224-5p                | 1 |
| <i>circDGKH</i> | miR-2392                  | 1 |
| <i>circDGKH</i> | miR-24-5p                 | 1 |
| <i>circDGKH</i> | miR-2467-5p               | 1 |
| <i>circDGKH</i> | miR-26-3p                 | 2 |
| <i>circDGKH</i> | miR-299-5p                | 1 |
| <i>circDGKH</i> | miR-29c-5p                | 1 |
| <i>circDGKH</i> | miR-30-3p                 | 2 |
| <i>circDGKH</i> | miR-302c-3p.2/520-3p      | 1 |
| <i>circDGKH</i> | miR-302c-5p               | 1 |
| <i>circDGKH</i> | miR-3064-3p               | 3 |
| <i>circDGKH</i> | miR-3074-3p               | 1 |
| <i>circDGKH</i> | miR-31-3p                 | 1 |
| <i>circDGKH</i> | miR-3121-5p               | 2 |
| <i>circDGKH</i> | miR-3122/3913-5p          | 1 |
| <i>circDGKH</i> | miR-3126-3p               | 1 |
| <i>circDGKH</i> | miR-3127-5p               | 1 |
| <i>circDGKH</i> | miR-3135a                 | 2 |
| <i>circDGKH</i> | miR-3135b                 | 1 |
| <i>circDGKH</i> | miR-3143                  | 2 |
| <i>circDGKH</i> | miR-3146                  | 1 |
| <i>circDGKH</i> | miR-3161                  | 3 |
| <i>circDGKH</i> | miR-3171                  | 1 |
| <i>circDGKH</i> | miR-3183/4723-3p/6769b-3p | 1 |
| <i>circDGKH</i> | miR-3188                  | 1 |
| <i>circDGKH</i> | miR-3191-5p               | 1 |
| <i>circDGKH</i> | miR-3194-3p               | 2 |
| <i>circDGKH</i> | miR-324-3p/1913           | 1 |
| <i>circDGKH</i> | miR-325                   | 1 |
| <i>circDGKH</i> | miR-329-5p                | 1 |

|                 |                           |   |
|-----------------|---------------------------|---|
| <i>circDGKH</i> | miR-33-5p                 | 1 |
| <i>circDGKH</i> | miR-335-3p                | 2 |
| <i>circDGKH</i> | miR-33a-3p                | 3 |
| <i>circDGKH</i> | miR-33b-3p/515-3p/519e-3p | 1 |
| <i>circDGKH</i> | miR-3591-5p               | 1 |
| <i>circDGKH</i> | miR-3606-5p               | 1 |
| <i>circDGKH</i> | miR-3607-3p               | 1 |
| <i>circDGKH</i> | miR-361-5p                | 1 |
| <i>circDGKH</i> | miR-3619-3p               | 1 |
| <i>circDGKH</i> | miR-3655                  | 2 |
| <i>circDGKH</i> | miR-3657                  | 1 |
| <i>circDGKH</i> | miR-3663-3p               | 1 |
| <i>circDGKH</i> | miR-367-5p                | 1 |
| <i>circDGKH</i> | miR-3670                  | 1 |
| <i>circDGKH</i> | miR-3671                  | 1 |
| <i>circDGKH</i> | miR-3675-3p               | 1 |
| <i>circDGKH</i> | miR-3680-3p               | 2 |
| <i>circDGKH</i> | miR-3682-3p               | 1 |
| <i>circDGKH</i> | miR-3683                  | 1 |
| <i>circDGKH</i> | miR-3686                  | 1 |
| <i>circDGKH</i> | miR-3691-3p               | 1 |
| <i>circDGKH</i> | miR-371-5p                | 1 |
| <i>circDGKH</i> | miR-371a-3p               | 1 |
| <i>circDGKH</i> | miR-371b-3p               | 1 |
| <i>circDGKH</i> | miR-371b-5p/373-5p/616-5p | 1 |
| <i>circDGKH</i> | miR-372-5p                | 1 |
| <i>circDGKH</i> | miR-374a-3p               | 1 |
| <i>circDGKH</i> | miR-374b-3p               | 1 |
| <i>circDGKH</i> | miR-376b-5p/376c-5p       | 1 |
| <i>circDGKH</i> | miR-377-3p                | 2 |
| <i>circDGKH</i> | miR-377-5p/6086           | 1 |
| <i>circDGKH</i> | miR-378j/6839-5p          | 1 |
| <i>circDGKH</i> | miR-382-3p                | 1 |
| <i>circDGKH</i> | miR-3908                  | 2 |
| <i>circDGKH</i> | miR-3923                  | 1 |
| <i>circDGKH</i> | miR-3925-3p               | 1 |
| <i>circDGKH</i> | miR-3929/4419b/4478       | 1 |
| <i>circDGKH</i> | miR-3940-5p/4507          | 1 |

|                 |                  |   |
|-----------------|------------------|---|
| <i>circDGKH</i> | miR-3942-5p      | 2 |
| <i>circDGKH</i> | miR-3973         | 1 |
| <i>circDGKH</i> | miR-3975         | 1 |
| <i>circDGKH</i> | miR-421          | 1 |
| <i>circDGKH</i> | miR-4251         | 1 |
| <i>circDGKH</i> | miR-4263         | 2 |
| <i>circDGKH</i> | miR-4268         | 3 |
| <i>circDGKH</i> | miR-4273/7156-5p | 2 |
| <i>circDGKH</i> | miR-4292/6791-5p | 1 |
| <i>circDGKH</i> | miR-4308         | 1 |
| <i>circDGKH</i> | miR-4317         | 1 |
| <i>circDGKH</i> | miR-432-3p       | 1 |
| <i>circDGKH</i> | miR-4325         | 1 |
| <i>circDGKH</i> | miR-4329         | 1 |
| <i>circDGKH</i> | miR-433-3p       | 1 |
| <i>circDGKH</i> | miR-4427         | 1 |
| <i>circDGKH</i> | miR-4433b-5p     | 1 |
| <i>circDGKH</i> | miR-4436b-5p     | 1 |
| <i>circDGKH</i> | miR-4448         | 3 |
| <i>circDGKH</i> | miR-4452         | 1 |
| <i>circDGKH</i> | miR-4454         | 2 |
| <i>circDGKH</i> | miR-4473         | 1 |
| <i>circDGKH</i> | miR-4474-3p      | 1 |
| <i>circDGKH</i> | miR-4477a        | 1 |
| <i>circDGKH</i> | miR-4477b        | 1 |
| <i>circDGKH</i> | miR-4490         | 1 |
| <i>circDGKH</i> | miR-4497         | 2 |
| <i>circDGKH</i> | miR-450a-1-3p    | 1 |
| <i>circDGKH</i> | miR-450b-5p      | 2 |
| <i>circDGKH</i> | miR-451b         | 1 |
| <i>circDGKH</i> | miR-4523         | 1 |
| <i>circDGKH</i> | miR-4529-5p      | 1 |
| <i>circDGKH</i> | miR-4531         | 1 |
| <i>circDGKH</i> | miR-4532         | 2 |
| <i>circDGKH</i> | miR-4535         | 1 |
| <i>circDGKH</i> | miR-455-3p.1     | 2 |
| <i>circDGKH</i> | miR-4633-5p      | 1 |
| <i>circDGKH</i> | miR-4635         | 1 |

|                 |                       |   |
|-----------------|-----------------------|---|
| <i>circDGKH</i> | miR-4641              | 1 |
| <i>circDGKH</i> | miR-4643              | 1 |
| <i>circDGKH</i> | miR-4659a-5p/4659b-5p | 1 |
| <i>circDGKH</i> | miR-4669              | 1 |
| <i>circDGKH</i> | miR-4671-3p           | 1 |
| <i>circDGKH</i> | miR-4677-5p           | 2 |
| <i>circDGKH</i> | miR-4680-3p           | 1 |
| <i>circDGKH</i> | miR-4686              | 1 |
| <i>circDGKH</i> | miR-4694-3p           | 1 |
| <i>circDGKH</i> | miR-4695-3p           | 1 |
| <i>circDGKH</i> | miR-4725-5p           | 1 |
| <i>circDGKH</i> | miR-4733-5p           | 1 |
| <i>circDGKH</i> | miR-4738-3p           | 1 |
| <i>circDGKH</i> | miR-4753-3p           | 1 |
| <i>circDGKH</i> | miR-4764-3p           | 1 |
| <i>circDGKH</i> | miR-4764-5p           | 1 |
| <i>circDGKH</i> | miR-4774-5p           | 1 |
| <i>circDGKH</i> | miR-4776-3p           | 3 |
| <i>circDGKH</i> | miR-4776-5p           | 1 |
| <i>circDGKH</i> | miR-4777-5p           | 2 |
| <i>circDGKH</i> | miR-4778-5p           | 1 |
| <i>circDGKH</i> | miR-4786-5p           | 1 |
| <i>circDGKH</i> | miR-4788              | 1 |
| <i>circDGKH</i> | miR-4789-3p           | 1 |
| <i>circDGKH</i> | miR-4795-3p           | 2 |
| <i>circDGKH</i> | miR-4799-5p           | 1 |
| <i>circDGKH</i> | miR-483-3p.1          | 1 |
| <i>circDGKH</i> | miR-485-5p            | 1 |
| <i>circDGKH</i> | miR-490-3p            | 1 |
| <i>circDGKH</i> | miR-493-5p            | 1 |
| <i>circDGKH</i> | miR-5011-5p           | 2 |
| <i>circDGKH</i> | miR-505-3p.2          | 1 |
| <i>circDGKH</i> | miR-507/557           | 2 |
| <i>circDGKH</i> | miR-5089-3p           | 1 |
| <i>circDGKH</i> | miR-5092              | 1 |
| <i>circDGKH</i> | miR-5094              | 1 |
| <i>circDGKH</i> | miR-510-3p            | 1 |
| <i>circDGKH</i> | miR-512-3p            | 1 |



|                 |                                                                  |   |
|-----------------|------------------------------------------------------------------|---|
| <i>circDGKH</i> | miR-513a-3p/513c-3p/3606-3p                                      | 1 |
| <i>circDGKH</i> | miR-513c-5p/514b-5p                                              | 1 |
| <i>circDGKH</i> | miR-516a-5p                                                      | 1 |
| <i>circDGKH</i> | miR-5187-3p                                                      | 1 |
| <i>circDGKH</i> | miR-518d-5p/519-5p                                               | 2 |
| <i>circDGKH</i> | miR-5197-5p                                                      | 2 |
| <i>circDGKH</i> | miR-520g-3p                                                      | 1 |
| <i>circDGKH</i> | miR-522-3p                                                       | 1 |
| <i>circDGKH</i> | miR-524-5p                                                       | 1 |
| <i>circDGKH</i> | miR-532-5p                                                       | 1 |
| <i>circDGKH</i> | miR-539-5p                                                       | 1 |
| <i>circDGKH</i> | miR-544a                                                         | 1 |
| <i>circDGKH</i> | miR-545-3p                                                       | 1 |
| <i>circDGKH</i> | miR-545-5p                                                       | 2 |
| <i>circDGKH</i> | miR-548at-5p                                                     | 1 |
| <i>circDGKH</i> | miR-548av-3p                                                     | 1 |
| <i>circDGKH</i> | miR-548av-5p/548k/8054                                           | 1 |
| <i>circDGKH</i> | miR-548ay-5p/548au-5p/548as-5p/548ar-5p/548aq-5p/548ap-5p/548am- |   |
| <i>circDGKH</i> | miR-548az-3p/548ar-3p/548a-3p/548e-3p/548f-3p                    |   |
| <i>circDGKH</i> | miR-548az-5p/548t-5p                                             | 1 |
| <i>circDGKH</i> | miR-548l                                                         | 1 |
| <i>circDGKH</i> | miR-548n                                                         | 1 |
| <i>circDGKH</i> | miR-548p                                                         | 1 |
| <i>circDGKH</i> | miR-550a-3-5p/550a-5p/1271-3p                                    | 1 |
| <i>circDGKH</i> | miR-551b-5p                                                      | 1 |
| <i>circDGKH</i> | miR-552-5p                                                       | 1 |
| <i>circDGKH</i> | miR-553                                                          | 2 |
| <i>circDGKH</i> | miR-554                                                          | 1 |
| <i>circDGKH</i> | miR-556-5p                                                       | 1 |
| <i>circDGKH</i> | miR-5582-3p                                                      | 1 |
| <i>circDGKH</i> | miR-5585-3p                                                      | 1 |
| <i>circDGKH</i> | miR-5586-3p                                                      | 1 |
| <i>circDGKH</i> | miR-5590-5p                                                      | 1 |
| <i>circDGKH</i> | miR-561-3p                                                       | 1 |
| <i>circDGKH</i> | miR-5680                                                         | 1 |
| <i>circDGKH</i> | miR-5681b                                                        | 1 |
| <i>circDGKH</i> | miR-5701                                                         | 1 |
| <i>circDGKH</i> | miR-573/3616-5p                                                  | 1 |

|                 |             |   |
|-----------------|-------------|---|
| <i>circDGKH</i> | miR-576-5p  | 2 |
| <i>circDGKH</i> | miR-578     | 1 |
| <i>circDGKH</i> | miR-580-3p  | 1 |
| <i>circDGKH</i> | miR-590-3p  | 3 |
| <i>circDGKH</i> | miR-597-3p  | 1 |
| <i>circDGKH</i> | miR-598-5p  | 1 |
| <i>circDGKH</i> | miR-602     | 1 |
| <i>circDGKH</i> | miR-604     | 1 |
| <i>circDGKH</i> | miR-6068    | 1 |
| <i>circDGKH</i> | miR-6071    | 1 |
| <i>circDGKH</i> | miR-6077    | 1 |
| <i>circDGKH</i> | miR-6081    | 1 |
| <i>circDGKH</i> | miR-6083    | 1 |
| <i>circDGKH</i> | miR-6090    | 1 |
| <i>circDGKH</i> | miR-619-3p  | 1 |
| <i>circDGKH</i> | miR-628-3p  | 1 |
| <i>circDGKH</i> | miR-636     | 1 |
| <i>circDGKH</i> | miR-642-3p  | 1 |
| <i>circDGKH</i> | miR-649     | 1 |
| <i>circDGKH</i> | miR-6509-3p | 1 |
| <i>circDGKH</i> | miR-6513-5p | 1 |
| <i>circDGKH</i> | miR-652-3p  | 1 |
| <i>circDGKH</i> | miR-655-5p  | 1 |
| <i>circDGKH</i> | miR-656-3p  | 1 |
| <i>circDGKH</i> | miR-662     | 1 |
| <i>circDGKH</i> | miR-664b-5p | 1 |
| <i>circDGKH</i> | miR-665     | 2 |
| <i>circDGKH</i> | miR-670-5p  | 1 |
| <i>circDGKH</i> | miR-6720-5p | 1 |
| <i>circDGKH</i> | miR-6721-5p | 1 |
| <i>circDGKH</i> | miR-6728-3p | 1 |
| <i>circDGKH</i> | miR-6731-3p | 2 |
| <i>circDGKH</i> | miR-6732-3p | 1 |
| <i>circDGKH</i> | miR-6738-3p | 1 |
| <i>circDGKH</i> | miR-6740-5p | 1 |
| <i>circDGKH</i> | miR-6741-3p | 1 |
| <i>circDGKH</i> | miR-6761-5p | 1 |
| <i>circDGKH</i> | miR-6762-3p | 1 |

|                 |                              |   |
|-----------------|------------------------------|---|
| <i>circDGKH</i> | miR-6772-3p                  | 1 |
| <i>circDGKH</i> | miR-6780a-3p                 | 3 |
| <i>circDGKH</i> | miR-6782-3p                  | 1 |
| <i>circDGKH</i> | miR-6800-3p                  | 1 |
| <i>circDGKH</i> | miR-6816-3p                  | 1 |
| <i>circDGKH</i> | miR-6817-3p                  | 1 |
| <i>circDGKH</i> | miR-6822-3p                  | 1 |
| <i>circDGKH</i> | miR-6828-3p                  | 1 |
| <i>circDGKH</i> | miR-6832-3p                  | 1 |
| <i>circDGKH</i> | miR-6839-3p                  | 1 |
| <i>circDGKH</i> | miR-6879-3p                  | 1 |
| <i>circDGKH</i> | miR-6881-3p                  | 3 |
| <i>circDGKH</i> | miR-6888-3p                  | 1 |
| <i>circDGKH</i> | miR-6892-5p                  | 1 |
| <i>circDGKH</i> | miR-7-5p                     | 1 |
| <i>circDGKH</i> | miR-7108-5p                  | 1 |
| <i>circDGKH</i> | miR-7110-3p                  | 1 |
| <i>circDGKH</i> | miR-7111-3p                  | 3 |
| <i>circDGKH</i> | miR-7154-5p                  | 1 |
| <i>circDGKH</i> | miR-7159-5p                  | 1 |
| <i>circDGKH</i> | miR-759                      | 1 |
| <i>circDGKH</i> | miR-760                      | 1 |
| <i>circDGKH</i> | miR-764                      | 3 |
| <i>circDGKH</i> | miR-766-3p                   | 1 |
| <i>circDGKH</i> | miR-769-5p                   | 1 |
| <i>circDGKH</i> | miR-7703                     | 1 |
| <i>circDGKH</i> | miR-7705                     | 2 |
| <i>circDGKH</i> | miR-7849-3p                  | 1 |
| <i>circDGKH</i> | miR-7851-3p                  | 1 |
| <i>circDGKH</i> | miR-7856-5p                  | 1 |
| <i>circDGKH</i> | miR-802                      | 2 |
| <i>circDGKH</i> | miR-8062                     | 1 |
| <i>circDGKH</i> | miR-8080                     | 1 |
| <i>circDGKH</i> | miR-887-5p                   | 1 |
| <i>circDGKH</i> | miR-888-5p                   | 1 |
| <i>circDGKH</i> | miR-920/4300/5591-5p/6726-5p | 1 |
| <i>circDGKH</i> | miR-921                      | 1 |
| <i>circDGKH</i> | miR-95-5p                    | 2 |

|                 |                     |   |
|-----------------|---------------------|---|
| <i>circDGKI</i> | miR-1-3p/206        | 1 |
| <i>circDGKI</i> | miR-1178-3p         | 1 |
| <i>circDGKI</i> | miR-1178-5p         | 1 |
| <i>circDGKI</i> | miR-1180-5p         | 1 |
| <i>circDGKI</i> | miR-1182            | 1 |
| <i>circDGKI</i> | miR-1184            | 3 |
| <i>circDGKI</i> | miR-1193            | 1 |
| <i>circDGKI</i> | miR-1197            | 1 |
| <i>circDGKI</i> | miR-1205            | 3 |
| <i>circDGKI</i> | miR-1208            | 1 |
| <i>circDGKI</i> | miR-122-5p          | 1 |
| <i>circDGKI</i> | miR-1224-5p         | 3 |
| <i>circDGKI</i> | miR-1226-3p         | 1 |
| <i>circDGKI</i> | miR-1236-3p         | 1 |
| <i>circDGKI</i> | miR-1236-5p         | 1 |
| <i>circDGKI</i> | miR-1238-3p         | 2 |
| <i>circDGKI</i> | miR-1238-5p/4758-5p | 1 |
| <i>circDGKI</i> | miR-1243            | 1 |
| <i>circDGKI</i> | miR-1245b-3p        | 1 |
| <i>circDGKI</i> | miR-1246            | 1 |
| <i>circDGKI</i> | miR-1254/3116       | 1 |
| <i>circDGKI</i> | miR-1255a/1255b-5p  | 2 |
| <i>circDGKI</i> | miR-1255b-2-3p      | 2 |
| <i>circDGKI</i> | miR-1266-5p/4518    | 4 |
| <i>circDGKI</i> | miR-1267            | 1 |
| <i>circDGKI</i> | miR-1270            | 5 |
| <i>circDGKI</i> | miR-1272            | 2 |
| <i>circDGKI</i> | miR-1273g-3p        | 1 |
| <i>circDGKI</i> | miR-1273h-3p        | 1 |
| <i>circDGKI</i> | miR-1277-3p         | 1 |
| <i>circDGKI</i> | miR-1277-5p         | 1 |
| <i>circDGKI</i> | miR-1283            | 1 |
| <i>circDGKI</i> | miR-1285-5p         | 5 |
| <i>circDGKI</i> | miR-1288-5p         | 5 |
| <i>circDGKI</i> | miR-1295b-5p/1912   | 3 |
| <i>circDGKI</i> | miR-1296-3p         | 1 |
| <i>circDGKI</i> | miR-1298-5p         | 1 |
| <i>circDGKI</i> | miR-1299            | 1 |

|                 |                                     |   |
|-----------------|-------------------------------------|---|
| <i>circDGKI</i> | miR-1304-3p                         | 1 |
| <i>circDGKI</i> | miR-132-3p/212-3p                   | 1 |
| <i>circDGKI</i> | miR-1322                            | 2 |
| <i>circDGKI</i> | miR-133a-5p                         | 1 |
| <i>circDGKI</i> | miR-1343-3p                         | 1 |
| <i>circDGKI</i> | miR-135-5p                          | 1 |
| <i>circDGKI</i> | miR-138-5p                          | 1 |
| <i>circDGKI</i> | miR-139-3p                          | 2 |
| <i>circDGKI</i> | miR-143-5p                          | 1 |
| <i>circDGKI</i> | miR-146a-3p                         | 1 |
| <i>circDGKI</i> | miR-146b-3p                         | 4 |
| <i>circDGKI</i> | miR-1471                            | 1 |
| <i>circDGKI</i> | miR-149-3p/4728-5p/6785-5p/6883-5p  | 2 |
| <i>circDGKI</i> | miR-149-5p                          | 2 |
| <i>circDGKI</i> | miR-1537-3p                         | 1 |
| <i>circDGKI</i> | miR-1539                            | 3 |
| <i>circDGKI</i> | miR-154-3p/487-3p                   | 1 |
| <i>circDGKI</i> | miR-1587/3620-5p                    | 2 |
| <i>circDGKI</i> | miR-17-3p                           | 3 |
| <i>circDGKI</i> | miR-17-5p/20-5p/93-5p/106-5p/519-3p | 1 |
| <i>circDGKI</i> | miR-18-5p                           | 3 |
| <i>circDGKI</i> | miR-181-5p                          | 1 |
| <i>circDGKI</i> | miR-1827                            | 1 |
| <i>circDGKI</i> | miR-185-3p                          | 2 |
| <i>circDGKI</i> | miR-185-5p                          | 1 |
| <i>circDGKI</i> | miR-18a-3p                          | 1 |
| <i>circDGKI</i> | miR-190-5p                          | 1 |
| <i>circDGKI</i> | miR-1908-5p                         | 1 |
| <i>circDGKI</i> | miR-1909-3p/6722-3p                 | 1 |
| <i>circDGKI</i> | miR-1910-3p/6511a-5p                | 2 |
| <i>circDGKI</i> | miR-1911-3p                         | 1 |
| <i>circDGKI</i> | miR-1915-3p/6764-5p                 | 3 |
| <i>circDGKI</i> | miR-192-5p/215-5p                   | 3 |
| <i>circDGKI</i> | miR-194-3p                          | 1 |
| <i>circDGKI</i> | miR-194-5p                          | 1 |
| <i>circDGKI</i> | miR-196a-3p                         | 2 |
| <i>circDGKI</i> | miR-197-3p                          | 3 |
| <i>circDGKI</i> | miR-1976                            | 1 |

|                 |                                              |   |
|-----------------|----------------------------------------------|---|
| <i>circDGKI</i> | miR-200ab-5p                                 | 1 |
| <i>circDGKI</i> | miR-202-5p                                   | 2 |
| <i>circDGKI</i> | miR-203a-3p.1                                | 1 |
| <i>circDGKI</i> | miR-204-3p/4646-5p                           | 1 |
| <i>circDGKI</i> | miR-205-5p                                   | 1 |
| <i>circDGKI</i> | miR-2110                                     | 7 |
| <i>circDGKI</i> | miR-2113                                     | 4 |
| <i>circDGKI</i> | miR-219-5p                                   | 1 |
| <i>circDGKI</i> | miR-221-3p/222-3p                            | 4 |
| <i>circDGKI</i> | miR-221-5p/8073                              | 1 |
| <i>circDGKI</i> | miR-23-5p                                    | 1 |
| <i>circDGKI</i> | miR-2355-5p                                  | 3 |
| <i>circDGKI</i> | miR-24-3p                                    | 1 |
| <i>circDGKI</i> | miR-2467-5p                                  | 2 |
| <i>circDGKI</i> | miR-2681-3p                                  | 2 |
| <i>circDGKI</i> | miR-26b-3p                                   | 2 |
| <i>circDGKI</i> | miR-27-3p                                    | 1 |
| <i>circDGKI</i> | miR-29a-5p                                   | 2 |
| <i>circDGKI</i> | miR-3064-5p                                  | 1 |
| <i>circDGKI</i> | miR-3065-3p                                  | 1 |
| <i>circDGKI</i> | miR-30b-3p/1273h-5p/3689-3p/6779-5p/6780a-5p |   |
| <i>circDGKI</i> | miR-30c-3p/6788-5p                           | 1 |
| <i>circDGKI</i> | miR-3119                                     | 1 |
| <i>circDGKI</i> | miR-3121-3p                                  | 1 |
| <i>circDGKI</i> | miR-3121-5p                                  | 1 |
| <i>circDGKI</i> | miR-3123                                     | 3 |
| <i>circDGKI</i> | miR-3125/3916/6859-5p                        | 1 |
| <i>circDGKI</i> | miR-3127-5p                                  | 1 |
| <i>circDGKI</i> | miR-3128                                     | 1 |
| <i>circDGKI</i> | miR-3130-5p/4482-5p                          | 3 |
| <i>circDGKI</i> | miR-3134                                     | 5 |
| <i>circDGKI</i> | miR-3140-3p                                  | 2 |
| <i>circDGKI</i> | miR-3144-5p                                  | 2 |
| <i>circDGKI</i> | miR-3148                                     | 1 |
| <i>circDGKI</i> | miR-3150a-3p                                 | 7 |
| <i>circDGKI</i> | miR-3150a-5p/3150b-5p                        | 5 |
| <i>circDGKI</i> | miR-3151-3p                                  | 1 |
| <i>circDGKI</i> | miR-3153/6733-5p/6739-5p                     | 1 |

|                 |                    |   |
|-----------------|--------------------|---|
| <i>circDGKI</i> | miR-3156-5p        | 3 |
| <i>circDGKI</i> | miR-3157-3p        | 2 |
| <i>circDGKI</i> | miR-3157-5p        | 4 |
| <i>circDGKI</i> | miR-3158-3p        | 4 |
| <i>circDGKI</i> | miR-3158-5p        | 3 |
| <i>circDGKI</i> | miR-3163           | 2 |
| <i>circDGKI</i> | miR-3165           | 2 |
| <i>circDGKI</i> | miR-3166           | 1 |
| <i>circDGKI</i> | miR-3169           | 1 |
| <i>circDGKI</i> | miR-3173-5p        | 4 |
| <i>circDGKI</i> | miR-3175           | 2 |
| <i>circDGKI</i> | miR-3181           | 1 |
| <i>circDGKI</i> | miR-3182           | 2 |
| <i>circDGKI</i> | miR-3185           | 5 |
| <i>circDGKI</i> | miR-3188           | 2 |
| <i>circDGKI</i> | miR-3190-3p        | 5 |
| <i>circDGKI</i> | miR-3191-3p        | 2 |
| <i>circDGKI</i> | miR-3192-5p        | 1 |
| <i>circDGKI</i> | miR-3193           | 2 |
| <i>circDGKI</i> | miR-3199/8052      | 1 |
| <i>circDGKI</i> | miR-32-3p          | 1 |
| <i>circDGKI</i> | miR-320            | 3 |
| <i>circDGKI</i> | miR-3200-5p        | 1 |
| <i>circDGKI</i> | miR-320e           | 2 |
| <i>circDGKI</i> | miR-323a-5p        | 3 |
| <i>circDGKI</i> | miR-324-3p/1913    | 1 |
| <i>circDGKI</i> | miR-329-5p         | 1 |
| <i>circDGKI</i> | miR-330-3p         | 1 |
| <i>circDGKI</i> | miR-335-3p         | 1 |
| <i>circDGKI</i> | miR-34-5p/449-5p   | 2 |
| <i>circDGKI</i> | miR-340-5p         | 1 |
| <i>circDGKI</i> | miR-345-5p         | 1 |
| <i>circDGKI</i> | miR-346            | 1 |
| <i>circDGKI</i> | miR-34b-5p/449c-5p | 2 |
| <i>circDGKI</i> | miR-3529-3p        | 1 |
| <i>circDGKI</i> | miR-3610           | 1 |
| <i>circDGKI</i> | miR-3611           | 1 |
| <i>circDGKI</i> | miR-3612           | 2 |

|                 |                     |   |
|-----------------|---------------------|---|
| <i>circDGKI</i> | miR-3614-5p         | 2 |
| <i>circDGKI</i> | miR-3618            | 1 |
| <i>circDGKI</i> | miR-3619-3p         | 2 |
| <i>circDGKI</i> | miR-362-5p/500b-5p  | 1 |
| <i>circDGKI</i> | miR-3620-3p         | 1 |
| <i>circDGKI</i> | miR-3622b-5p        | 2 |
| <i>circDGKI</i> | miR-3649            | 1 |
| <i>circDGKI</i> | miR-365-3p          | 2 |
| <i>circDGKI</i> | miR-3650            | 1 |
| <i>circDGKI</i> | miR-3652/4430       | 2 |
| <i>circDGKI</i> | miR-3653-5p         | 1 |
| <i>circDGKI</i> | miR-3654            | 1 |
| <i>circDGKI</i> | miR-3655            | 1 |
| <i>circDGKI</i> | miR-3659            | 1 |
| <i>circDGKI</i> | miR-365a-5p/365b-5p | 1 |
| <i>circDGKI</i> | miR-3662            | 1 |
| <i>circDGKI</i> | miR-3663-3p         | 1 |
| <i>circDGKI</i> | miR-3664-3p         | 4 |
| <i>circDGKI</i> | miR-3667-3p         | 3 |
| <i>circDGKI</i> | miR-367-5p          | 1 |
| <i>circDGKI</i> | miR-3678-3p         | 1 |
| <i>circDGKI</i> | miR-3679-3p         | 1 |
| <i>circDGKI</i> | miR-3680-3p         | 2 |
| <i>circDGKI</i> | miR-3681-5p         | 4 |
| <i>circDGKI</i> | miR-3682-3p         | 2 |
| <i>circDGKI</i> | miR-3685            | 2 |
| <i>circDGKI</i> | miR-3688-3p         | 3 |
| <i>circDGKI</i> | miR-3690            | 1 |
| <i>circDGKI</i> | miR-3692-3p         | 2 |
| <i>circDGKI</i> | miR-3692-5p         | 2 |
| <i>circDGKI</i> | miR-377-5p/6086     | 1 |
| <i>circDGKI</i> | miR-378-3p          | 1 |
| <i>circDGKI</i> | miR-378j/6839-5p    | 2 |
| <i>circDGKI</i> | miR-383-3p          | 1 |
| <i>circDGKI</i> | miR-383-5p.2        | 1 |
| <i>circDGKI</i> | miR-384             | 2 |
| <i>circDGKI</i> | miR-3912-3p         | 1 |
| <i>circDGKI</i> | miR-3915            | 3 |



|                 |                           |   |
|-----------------|---------------------------|---|
| <i>circDGKI</i> | miR-3918                  | 3 |
| <i>circDGKI</i> | miR-3925-5p               | 3 |
| <i>circDGKI</i> | miR-3928-3p               | 1 |
| <i>circDGKI</i> | miR-3928-5p/6806-3p       | 1 |
| <i>circDGKI</i> | miR-3929/4419b/4478       | 1 |
| <i>circDGKI</i> | miR-3942-3p               | 1 |
| <i>circDGKI</i> | miR-3944-3p               | 1 |
| <i>circDGKI</i> | miR-3945                  | 1 |
| <i>circDGKI</i> | miR-3974                  | 1 |
| <i>circDGKI</i> | miR-3975                  | 2 |
| <i>circDGKI</i> | miR-412-3p/6754-3p        | 2 |
| <i>circDGKI</i> | miR-421                   | 1 |
| <i>circDGKI</i> | miR-425-3p                | 1 |
| <i>circDGKI</i> | miR-4252                  | 1 |
| <i>circDGKI</i> | miR-4253/6862-5p          | 1 |
| <i>circDGKI</i> | miR-4254                  | 1 |
| <i>circDGKI</i> | miR-4257                  | 2 |
| <i>circDGKI</i> | miR-4261                  | 2 |
| <i>circDGKI</i> | miR-4266                  | 1 |
| <i>circDGKI</i> | miR-4269/6715b-5p         | 2 |
| <i>circDGKI</i> | miR-4270/4441/6754-5p     | 2 |
| <i>circDGKI</i> | miR-4271/4725-3p/6780b-5p | 2 |
| <i>circDGKI</i> | miR-4273/7156-5p          | 1 |
| <i>circDGKI</i> | miR-4279                  | 3 |
| <i>circDGKI</i> | miR-4280                  | 1 |
| <i>circDGKI</i> | miR-4284                  | 1 |
| <i>circDGKI</i> | miR-4287/4685-3p          | 5 |
| <i>circDGKI</i> | miR-4291                  | 1 |
| <i>circDGKI</i> | miR-4299                  | 3 |
| <i>circDGKI</i> | miR-4315                  | 1 |
| <i>circDGKI</i> | miR-4318                  | 1 |
| <i>circDGKI</i> | miR-4320                  | 1 |
| <i>circDGKI</i> | miR-4325                  | 1 |
| <i>circDGKI</i> | miR-4328                  | 2 |
| <i>circDGKI</i> | miR-4330                  | 3 |
| <i>circDGKI</i> | miR-4417                  | 2 |
| <i>circDGKI</i> | miR-4426/4647/4662b       | 5 |
| <i>circDGKI</i> | miR-4432                  | 1 |

|                 |                   |   |
|-----------------|-------------------|---|
| <i>circDGKI</i> | miR-4433b-3p      | 1 |
| <i>circDGKI</i> | miR-4437          | 3 |
| <i>circDGKI</i> | miR-4443          | 1 |
| <i>circDGKI</i> | miR-4445-5p       | 1 |
| <i>circDGKI</i> | miR-4446-3p       | 4 |
| <i>circDGKI</i> | miR-4446-5p       | 1 |
| <i>circDGKI</i> | miR-4450          | 2 |
| <i>circDGKI</i> | miR-4453/4538     | 1 |
| <i>circDGKI</i> | miR-4456          | 3 |
| <i>circDGKI</i> | miR-4463          | 3 |
| <i>circDGKI</i> | miR-4464/4748     | 1 |
| <i>circDGKI</i> | miR-4469          | 5 |
| <i>circDGKI</i> | miR-4482-3p       | 1 |
| <i>circDGKI</i> | miR-4494          | 2 |
| <i>circDGKI</i> | miR-4496          | 4 |
| <i>circDGKI</i> | miR-4497          | 2 |
| <i>circDGKI</i> | miR-4499          | 3 |
| <i>circDGKI</i> | miR-4504          | 2 |
| <i>circDGKI</i> | miR-4505/5787     | 2 |
| <i>circDGKI</i> | miR-4509          | 1 |
| <i>circDGKI</i> | miR-450b-5p       | 2 |
| <i>circDGKI</i> | miR-4514/4692     | 2 |
| <i>circDGKI</i> | miR-452-5p/892-3p | 1 |
| <i>circDGKI</i> | miR-4524b-3p      | 1 |
| <i>circDGKI</i> | miR-4531          | 5 |
| <i>circDGKI</i> | miR-4534/8082     | 5 |
| <i>circDGKI</i> | miR-4535          | 3 |
| <i>circDGKI</i> | miR-455-3p.2      | 1 |
| <i>circDGKI</i> | miR-455-5p        | 1 |
| <i>circDGKI</i> | miR-4638-3p       | 1 |
| <i>circDGKI</i> | miR-4639-5p       | 1 |
| <i>circDGKI</i> | miR-4645-3p       | 3 |
| <i>circDGKI</i> | miR-4645-5p/4673  | 1 |
| <i>circDGKI</i> | miR-4652-5p       | 2 |
| <i>circDGKI</i> | miR-4656          | 2 |
| <i>circDGKI</i> | miR-4658/6790-5p  | 1 |
| <i>circDGKI</i> | miR-4660          | 2 |
| <i>circDGKI</i> | miR-4663          | 2 |

|                 |                             |   |
|-----------------|-----------------------------|---|
| <i>circDGKI</i> | miR-4666a-5p                | 1 |
| <i>circDGKI</i> | miR-4667-5p/4700-5p/8089    | 6 |
| <i>circDGKI</i> | miR-4668-3p                 | 2 |
| <i>circDGKI</i> | miR-4668-5p                 | 1 |
| <i>circDGKI</i> | miR-4674                    | 2 |
| <i>circDGKI</i> | miR-4675/4741               | 2 |
| <i>circDGKI</i> | miR-4677-3p                 | 1 |
| <i>circDGKI</i> | miR-4677-5p                 | 1 |
| <i>circDGKI</i> | miR-4679                    | 1 |
| <i>circDGKI</i> | miR-4682                    | 1 |
| <i>circDGKI</i> | miR-4683                    | 2 |
| <i>circDGKI</i> | miR-4685-5p/6837-5p         | 1 |
| <i>circDGKI</i> | miR-4687-3p                 | 1 |
| <i>circDGKI</i> | miR-4689/6858-5p            | 3 |
| <i>circDGKI</i> | miR-4690-5p                 | 1 |
| <i>circDGKI</i> | miR-4691-3p                 | 1 |
| <i>circDGKI</i> | miR-4691-5p/6792-3p         | 1 |
| <i>circDGKI</i> | miR-4694-3p                 | 1 |
| <i>circDGKI</i> | miR-4695-3p                 | 6 |
| <i>circDGKI</i> | miR-4698                    | 1 |
| <i>circDGKI</i> | miR-4699-3p                 | 1 |
| <i>circDGKI</i> | miR-4699-5p                 | 3 |
| <i>circDGKI</i> | miR-4706/4749-5p            | 1 |
| <i>circDGKI</i> | miR-4709-3p                 | 3 |
| <i>circDGKI</i> | miR-4709-5p                 | 3 |
| <i>circDGKI</i> | miR-4711-5p                 | 2 |
| <i>circDGKI</i> | miR-4712-3p                 | 1 |
| <i>circDGKI</i> | miR-4713-3p                 | 1 |
| <i>circDGKI</i> | miR-4717-3p                 | 1 |
| <i>circDGKI</i> | miR-4720-5p/4799-3p/5588-5p | 1 |
| <i>circDGKI</i> | miR-4722-3p/6727-3p         | 1 |
| <i>circDGKI</i> | miR-4724-3p                 | 1 |
| <i>circDGKI</i> | miR-4726-3p                 | 3 |
| <i>circDGKI</i> | miR-4728-3p                 | 3 |
| <i>circDGKI</i> | miR-4731-5p                 | 2 |
| <i>circDGKI</i> | miR-4733-3p                 | 1 |
| <i>circDGKI</i> | miR-4734                    | 3 |
| <i>circDGKI</i> | miR-4735-5p                 | 1 |

|                 |                  |   |
|-----------------|------------------|---|
| <i>circDGKI</i> | miR-4739         | 1 |
| <i>circDGKI</i> | miR-4742-5p      | 2 |
| <i>circDGKI</i> | miR-4743-5p      | 1 |
| <i>circDGKI</i> | miR-4744         | 1 |
| <i>circDGKI</i> | miR-4750-3p      | 2 |
| <i>circDGKI</i> | miR-4750-5p      | 1 |
| <i>circDGKI</i> | miR-4751         | 2 |
| <i>circDGKI</i> | miR-4753-3p      | 1 |
| <i>circDGKI</i> | miR-4754         | 2 |
| <i>circDGKI</i> | miR-4759         | 1 |
| <i>circDGKI</i> | miR-4760-3p      | 1 |
| <i>circDGKI</i> | miR-4765         | 1 |
| <i>circDGKI</i> | miR-4766-5p      | 1 |
| <i>circDGKI</i> | miR-4771         | 1 |
| <i>circDGKI</i> | miR-4776-5p      | 3 |
| <i>circDGKI</i> | miR-4778-5p      | 2 |
| <i>circDGKI</i> | miR-4782-5p/5706 | 1 |
| <i>circDGKI</i> | miR-4790-5p      | 2 |
| <i>circDGKI</i> | miR-4795-3p      | 1 |
| <i>circDGKI</i> | miR-4797-5p      | 2 |
| <i>circDGKI</i> | miR-4802-5p      | 2 |
| <i>circDGKI</i> | miR-483-3p.1     | 1 |
| <i>circDGKI</i> | miR-483-3p.2     | 2 |
| <i>circDGKI</i> | miR-485-5p       | 2 |
| <i>circDGKI</i> | miR-488-3p       | 1 |
| <i>circDGKI</i> | miR-488-5p       | 2 |
| <i>circDGKI</i> | miR-490-3p       | 2 |
| <i>circDGKI</i> | miR-490-5p       | 1 |
| <i>circDGKI</i> | miR-493-3p       | 1 |
| <i>circDGKI</i> | miR-4999-3p      | 1 |
| <i>circDGKI</i> | miR-499b-5p      | 2 |
| <i>circDGKI</i> | miR-5000-3p      | 1 |
| <i>circDGKI</i> | miR-5004-5p      | 2 |
| <i>circDGKI</i> | miR-5007-5p      | 1 |
| <i>circDGKI</i> | miR-5009-3p      | 1 |
| <i>circDGKI</i> | miR-500a-5p      | 1 |
| <i>circDGKI</i> | miR-500b-3p      | 1 |
| <i>circDGKI</i> | miR-501-5p       | 1 |

|                 |                            |   |
|-----------------|----------------------------|---|
| <i>circDGKI</i> | miR-5010-3p                | 4 |
| <i>circDGKI</i> | miR-5011-5p                | 1 |
| <i>circDGKI</i> | miR-502-5p                 | 1 |
| <i>circDGKI</i> | miR-504-3p                 | 1 |
| <i>circDGKI</i> | miR-505-3p.2               | 1 |
| <i>circDGKI</i> | miR-505-5p                 | 2 |
| <i>circDGKI</i> | miR-506-5p                 | 1 |
| <i>circDGKI</i> | miR-507/557                | 2 |
| <i>circDGKI</i> | miR-508-3p                 | 1 |
| <i>circDGKI</i> | miR-5088-5p                | 4 |
| <i>circDGKI</i> | miR-5089-3p                | 1 |
| <i>circDGKI</i> | miR-5093                   | 2 |
| <i>circDGKI</i> | miR-510-3p                 | 1 |
| <i>circDGKI</i> | miR-5100                   | 1 |
| <i>circDGKI</i> | miR-512-5p                 | 1 |
| <i>circDGKI</i> | miR-513a-5p                | 1 |
| <i>circDGKI</i> | miR-513c-5p/514b-5p        | 1 |
| <i>circDGKI</i> | miR-516b-5p                | 1 |
| <i>circDGKI</i> | miR-5186                   | 3 |
| <i>circDGKI</i> | miR-5187-5p                | 3 |
| <i>circDGKI</i> | miR-5192                   | 1 |
| <i>circDGKI</i> | miR-5193                   | 2 |
| <i>circDGKI</i> | miR-5197-3p                | 4 |
| <i>circDGKI</i> | miR-522-3p                 | 1 |
| <i>circDGKI</i> | miR-524-5p                 | 1 |
| <i>circDGKI</i> | miR-525-5p                 | 3 |
| <i>circDGKI</i> | miR-532-5p                 | 2 |
| <i>circDGKI</i> | miR-539-3p                 | 1 |
| <i>circDGKI</i> | miR-542-3p                 | 2 |
| <i>circDGKI</i> | miR-543                    | 2 |
| <i>circDGKI</i> | miR-544a                   | 2 |
| <i>circDGKI</i> | miR-545-3p                 | 1 |
| <i>circDGKI</i> | miR-545-5p                 | 2 |
| <i>circDGKI</i> | miR-548ah-5p/3609          | 1 |
| <i>circDGKI</i> | miR-548ap-3p/548aa/548t-3p | 1 |
| <i>circDGKI</i> | miR-548as-3p               | 1 |
| <i>circDGKI</i> | miR-548au-3p               | 2 |
| <i>circDGKI</i> | miR-548ay-3p/548at-3p      | 1 |

|                 |                               |   |
|-----------------|-------------------------------|---|
| <i>circDGKI</i> | miR-548c-3p                   | 1 |
| <i>circDGKI</i> | miR-548m                      | 2 |
| <i>circDGKI</i> | miR-548q                      | 3 |
| <i>circDGKI</i> | miR-548u/7161-5p              | 1 |
| <i>circDGKI</i> | miR-548v                      | 4 |
| <i>circDGKI</i> | miR-550a-3-5p/550a-5p/1271-3p | 1 |
| <i>circDGKI</i> | miR-550b-2-5p                 | 1 |
| <i>circDGKI</i> | miR-551b-5p                   | 1 |
| <i>circDGKI</i> | miR-5580-5p                   | 1 |
| <i>circDGKI</i> | miR-5586-5p                   | 2 |
| <i>circDGKI</i> | miR-5589-3p                   | 1 |
| <i>circDGKI</i> | miR-5589-5p                   | 2 |
| <i>circDGKI</i> | miR-5683                      | 3 |
| <i>circDGKI</i> | miR-5690                      | 3 |
| <i>circDGKI</i> | miR-5693                      | 1 |
| <i>circDGKI</i> | miR-5694                      | 1 |
| <i>circDGKI</i> | miR-5702                      | 1 |
| <i>circDGKI</i> | miR-574-5p                    | 1 |
| <i>circDGKI</i> | miR-578                       | 1 |
| <i>circDGKI</i> | miR-584-5p                    | 1 |
| <i>circDGKI</i> | miR-590-3p                    | 1 |
| <i>circDGKI</i> | miR-591                       | 1 |
| <i>circDGKI</i> | miR-592                       | 1 |
| <i>circDGKI</i> | miR-593-3p                    | 1 |
| <i>circDGKI</i> | miR-597-5p                    | 3 |
| <i>circDGKI</i> | miR-599                       | 1 |
| <i>circDGKI</i> | miR-605-5p                    | 2 |
| <i>circDGKI</i> | miR-6071                      | 2 |
| <i>circDGKI</i> | miR-6076/6797-3p              | 1 |
| <i>circDGKI</i> | miR-6124                      | 1 |
| <i>circDGKI</i> | miR-6126                      | 2 |
| <i>circDGKI</i> | miR-6131                      | 1 |
| <i>circDGKI</i> | miR-6132/6836-5p              | 1 |
| <i>circDGKI</i> | miR-6165                      | 1 |
| <i>circDGKI</i> | miR-619-3p                    | 2 |
| <i>circDGKI</i> | miR-619-5p/6506-5p            | 1 |
| <i>circDGKI</i> | miR-622                       | 2 |
| <i>circDGKI</i> | miR-627-3p                    | 1 |

|                 |                  |   |
|-----------------|------------------|---|
| <i>circDGKI</i> | miR-628-5p       | 3 |
| <i>circDGKI</i> | miR-631/3661     | 4 |
| <i>circDGKI</i> | miR-633          | 2 |
| <i>circDGKI</i> | miR-637          | 6 |
| <i>circDGKI</i> | miR-638          | 1 |
| <i>circDGKI</i> | miR-642b-5p      | 1 |
| <i>circDGKI</i> | miR-649          | 2 |
| <i>circDGKI</i> | miR-6500-3p      | 2 |
| <i>circDGKI</i> | miR-6502-3p      | 2 |
| <i>circDGKI</i> | miR-6503-3p      | 1 |
| <i>circDGKI</i> | miR-6505-5p      | 2 |
| <i>circDGKI</i> | miR-651-5p       | 1 |
| <i>circDGKI</i> | miR-6510-5p      | 1 |
| <i>circDGKI</i> | miR-6511-5p      | 1 |
| <i>circDGKI</i> | miR-6514-3p      | 2 |
| <i>circDGKI</i> | miR-6514-5p      | 2 |
| <i>circDGKI</i> | miR-6515-3p      | 1 |
| <i>circDGKI</i> | miR-6515-5p      | 1 |
| <i>circDGKI</i> | miR-6516-5p      | 1 |
| <i>circDGKI</i> | miR-653-5p       | 2 |
| <i>circDGKI</i> | miR-654-3p       | 1 |
| <i>circDGKI</i> | miR-655-5p       | 1 |
| <i>circDGKI</i> | miR-660-3p       | 2 |
| <i>circDGKI</i> | miR-661          | 1 |
| <i>circDGKI</i> | miR-664a-5p/4794 | 2 |
| <i>circDGKI</i> | miR-668-3p       | 1 |
| <i>circDGKI</i> | miR-670-3p       | 2 |
| <i>circDGKI</i> | miR-6716-5p      | 1 |
| <i>circDGKI</i> | miR-6731-5p/8085 | 1 |
| <i>circDGKI</i> | miR-6734-3p      | 3 |
| <i>circDGKI</i> | miR-6738-3p      | 2 |
| <i>circDGKI</i> | miR-6742-3p      | 2 |
| <i>circDGKI</i> | miR-6744-5p      | 2 |
| <i>circDGKI</i> | miR-6747-3p      | 1 |
| <i>circDGKI</i> | miR-6749-3p      | 1 |
| <i>circDGKI</i> | miR-6752-3p      | 3 |
| <i>circDGKI</i> | miR-6753-5p      | 1 |
| <i>circDGKI</i> | miR-676-5p       | 1 |

|                 |                     |   |
|-----------------|---------------------|---|
| <i>circDGKI</i> | miR-6760-3p         | 1 |
| <i>circDGKI</i> | miR-6760-5p         | 1 |
| <i>circDGKI</i> | miR-6771-5p         | 1 |
| <i>circDGKI</i> | miR-6777-3p         | 1 |
| <i>circDGKI</i> | miR-6777-5p/6889-5p | 2 |
| <i>circDGKI</i> | miR-6782-3p         | 1 |
| <i>circDGKI</i> | miR-6784-5p         | 1 |
| <i>circDGKI</i> | miR-6787-3p         | 4 |
| <i>circDGKI</i> | miR-6794-3p         | 1 |
| <i>circDGKI</i> | miR-6799-5p         | 2 |
| <i>circDGKI</i> | miR-6808-3p         | 1 |
| <i>circDGKI</i> | miR-6810-5p         | 7 |
| <i>circDGKI</i> | miR-6814-5p         | 2 |
| <i>circDGKI</i> | miR-6817-3p         | 2 |
| <i>circDGKI</i> | miR-6818-3p         | 1 |
| <i>circDGKI</i> | miR-6819-3p/6877-3p | 2 |
| <i>circDGKI</i> | miR-6822-3p         | 3 |
| <i>circDGKI</i> | miR-6825-5p         | 2 |
| <i>circDGKI</i> | miR-6827-5p         | 1 |
| <i>circDGKI</i> | miR-6828-3p         | 2 |
| <i>circDGKI</i> | miR-6829-5p         | 2 |
| <i>circDGKI</i> | miR-6837-3p         | 2 |
| <i>circDGKI</i> | miR-6840-3p         | 3 |
| <i>circDGKI</i> | miR-6845-3p         | 2 |
| <i>circDGKI</i> | miR-6847-5p         | 2 |
| <i>circDGKI</i> | miR-6850-5p         | 2 |
| <i>circDGKI</i> | miR-6852-5p         | 2 |
| <i>circDGKI</i> | miR-6856-3p         | 1 |
| <i>circDGKI</i> | miR-6857-5p         | 7 |
| <i>circDGKI</i> | miR-6864-5p         | 2 |
| <i>circDGKI</i> | miR-6868-3p         | 4 |
| <i>circDGKI</i> | miR-6868-5p         | 1 |
| <i>circDGKI</i> | miR-6871-5p         | 2 |
| <i>circDGKI</i> | miR-6873-3p         | 2 |
| <i>circDGKI</i> | miR-6878-5p         | 1 |
| <i>circDGKI</i> | miR-6879-3p         | 1 |
| <i>circDGKI</i> | miR-6880-5p         | 2 |
| <i>circDGKI</i> | miR-6883-3p         | 1 |



|                 |                           |   |
|-----------------|---------------------------|---|
| <i>circDGKI</i> | miR-6885-3p               | 1 |
| <i>circDGKI</i> | miR-6894-3p               | 2 |
| <i>circDGKI</i> | miR-6894-5p               | 1 |
| <i>circDGKI</i> | miR-6895-3p               | 1 |
| <i>circDGKI</i> | miR-7-3p                  | 2 |
| <i>circDGKI</i> | miR-7106-3p               | 5 |
| <i>circDGKI</i> | miR-7106-5p               | 2 |
| <i>circDGKI</i> | miR-7109-3p               | 1 |
| <i>circDGKI</i> | miR-711                   | 1 |
| <i>circDGKI</i> | miR-7110-3p               | 2 |
| <i>circDGKI</i> | miR-7112-3p               | 2 |
| <i>circDGKI</i> | miR-7112-5p               | 2 |
| <i>circDGKI</i> | miR-7113-3p               | 5 |
| <i>circDGKI</i> | miR-7113-5p               | 1 |
| <i>circDGKI</i> | miR-7150                  | 1 |
| <i>circDGKI</i> | miR-7153-3p               | 4 |
| <i>circDGKI</i> | miR-7154-3p               | 1 |
| <i>circDGKI</i> | miR-7155-5p               | 6 |
| <i>circDGKI</i> | miR-7158-5p               | 1 |
| <i>circDGKI</i> | miR-7159-3p               | 1 |
| <i>circDGKI</i> | miR-7159-5p               | 1 |
| <i>circDGKI</i> | miR-7160-5p               | 2 |
| <i>circDGKI</i> | miR-7161-3p               | 6 |
| <i>circDGKI</i> | miR-744-5p                | 1 |
| <i>circDGKI</i> | miR-758-3p                | 3 |
| <i>circDGKI</i> | miR-759                   | 2 |
| <i>circDGKI</i> | miR-760                   | 3 |
| <i>circDGKI</i> | miR-762/4492/4498/5001-5p | 2 |
| <i>circDGKI</i> | miR-7641                  | 2 |
| <i>circDGKI</i> | miR-765                   | 1 |
| <i>circDGKI</i> | miR-766-5p                | 1 |
| <i>circDGKI</i> | miR-7703                  | 1 |
| <i>circDGKI</i> | miR-7705                  | 2 |
| <i>circDGKI</i> | miR-7845-5p               | 1 |
| <i>circDGKI</i> | miR-7851-3p               | 2 |
| <i>circDGKI</i> | miR-7855-5p               | 1 |
| <i>circDGKI</i> | miR-7974                  | 1 |
| <i>circDGKI</i> | miR-7976                  | 4 |

|                 |                         |   |
|-----------------|-------------------------|---|
| <i>circDGKI</i> | miR-7977                | 2 |
| <i>circDGKI</i> | miR-7978                | 3 |
| <i>circDGKI</i> | miR-802                 | 2 |
| <i>circDGKI</i> | miR-8057                | 3 |
| <i>circDGKI</i> | miR-8060                | 3 |
| <i>circDGKI</i> | miR-8063                | 1 |
| <i>circDGKI</i> | miR-8065                | 1 |
| <i>circDGKI</i> | miR-8066                | 1 |
| <i>circDGKI</i> | miR-8070                | 4 |
| <i>circDGKI</i> | miR-8071                | 2 |
| <i>circDGKI</i> | miR-8075                | 1 |
| <i>circDGKI</i> | miR-8076                | 1 |
| <i>circDGKI</i> | miR-8077                | 2 |
| <i>circDGKI</i> | miR-8083                | 1 |
| <i>circDGKI</i> | miR-8087                | 1 |
| <i>circDGKI</i> | miR-8088                | 1 |
| <i>circDGKI</i> | miR-873-5p.1            | 4 |
| <i>circDGKI</i> | miR-874-3p              | 2 |
| <i>circDGKI</i> | miR-875-3p              | 2 |
| <i>circDGKI</i> | miR-876-3p              | 3 |
| <i>circDGKI</i> | miR-885-3p              | 1 |
| <i>circDGKI</i> | miR-889-5p              | 1 |
| <i>circDGKI</i> | miR-891a-5p             | 1 |
| <i>circDGKI</i> | miR-891b                | 1 |
| <i>circDGKI</i> | miR-892-5p              | 1 |
| <i>circDGKI</i> | miR-892a                | 1 |
| <i>circDGKI</i> | miR-892b                | 1 |
| <i>circDGKI</i> | miR-9-3p                | 1 |
| <i>circDGKI</i> | miR-93-3p               | 2 |
| <i>circDGKI</i> | miR-934                 | 1 |
| <i>circDGKI</i> | miR-939-3p              | 2 |
| <i>circDGKI</i> | miR-939-5p/1343-5p      | 2 |
| <i>circDGKI</i> | miR-940/6808-5p/6893-5p | 2 |
| <i>circDGKI</i> | miR-96-3p               | 2 |
| <i>circDGKI</i> | miR-433-3p              | 2 |
| <i>circDGKI</i> | miR-7154-5p             | 2 |
| <i>circDGKI</i> | miR-3914                | 2 |
| <i>circDGKI</i> | miR-3941                | 1 |

|                 |                          |   |
|-----------------|--------------------------|---|
| <i>circDGKI</i> | miR-4672                 | 1 |
| <i>circDGKI</i> | miR-6768-5p              | 1 |
| <i>circDGKI</i> | let-7a-2-3p/let-7g-3p    | 3 |
| <i>circDGKI</i> | let-7c-3p                | 3 |
| <i>circDGKI</i> | let-7i-3p                | 1 |
| <i>circDGKI</i> | miR-100-3p               | 1 |
| <i>circDGKI</i> | miR-101-3p.2             | 1 |
| <i>circDGKI</i> | miR-103a-2-5p            | 2 |
| <i>circDGKI</i> | miR-10b-3p               | 1 |
| <i>circDGKI</i> | miR-1185-5p              | 1 |
| <i>circDGKI</i> | miR-1199-5p/6751-3p      | 1 |
| <i>circDGKI</i> | miR-1202/3972            | 1 |
| <i>circDGKI</i> | miR-1206                 | 2 |
| <i>circDGKI</i> | miR-1207-3p              | 2 |
| <i>circDGKI</i> | miR-1225-3p              | 1 |
| <i>circDGKI</i> | miR-1225-5p              | 1 |
| <i>circDGKI</i> | miR-1229-3p              | 1 |
| <i>circDGKI</i> | miR-1229-5p              | 1 |
| <i>circDGKI</i> | miR-1231                 | 1 |
| <i>circDGKI</i> | miR-1233-3p              | 2 |
| <i>circDGKI</i> | miR-1237-5p/4488/4697-5p | 2 |
| <i>circDGKI</i> | miR-1247-3p              | 2 |
| <i>circDGKI</i> | miR-1249-5p/6797-5p      | 1 |
| <i>circDGKI</i> | miR-125-5p               | 2 |
| <i>circDGKI</i> | miR-1252-5p              | 1 |
| <i>circDGKI</i> | miR-1253                 | 3 |
| <i>circDGKI</i> | miR-1257                 | 2 |
| <i>circDGKI</i> | miR-125a-3p              | 2 |
| <i>circDGKI</i> | miR-1263                 | 2 |
| <i>circDGKI</i> | miR-1264                 | 1 |
| <i>circDGKI</i> | miR-1266-3p              | 2 |
| <i>circDGKI</i> | miR-127-3p               | 1 |
| <i>circDGKI</i> | miR-1273d                | 2 |
| <i>circDGKI</i> | miR-1273e                | 1 |
| <i>circDGKI</i> | miR-1275/4665-5p         | 3 |
| <i>circDGKI</i> | miR-128-1-5p             | 1 |
| <i>circDGKI</i> | miR-1287-5p              | 3 |
| <i>circDGKI</i> | miR-1288-3p              | 1 |

|                 |                          |   |
|-----------------|--------------------------|---|
| <i>circDGKI</i> | miR-1289                 | 1 |
| <i>circDGKI</i> | miR-129-3p               | 3 |
| <i>circDGKI</i> | miR-1290                 | 2 |
| <i>circDGKI</i> | miR-1292-5p              | 2 |
| <i>circDGKI</i> | miR-130-3p/301-3p/454-3p | 1 |
| <i>circDGKI</i> | miR-1301-3p              | 2 |
| <i>circDGKI</i> | miR-1302/4298            | 2 |
| <i>circDGKI</i> | miR-1305                 | 1 |
| <i>circDGKI</i> | miR-130b-5p              | 1 |
| <i>circDGKI</i> | miR-134-3p               | 1 |
| <i>circDGKI</i> | miR-135b-3p              | 1 |
| <i>circDGKI</i> | miR-136-5p               | 2 |
| <i>circDGKI</i> | miR-138-1-3p             | 3 |
| <i>circDGKI</i> | miR-138-2-3p             | 1 |
| <i>circDGKI</i> | miR-139-5p               | 3 |
| <i>circDGKI</i> | miR-141-5p               | 1 |
| <i>circDGKI</i> | miR-145-5p               | 1 |
| <i>circDGKI</i> | miR-146-5p               | 3 |
| <i>circDGKI</i> | miR-147a                 | 1 |
| <i>circDGKI</i> | miR-147b                 | 1 |
| <i>circDGKI</i> | miR-148a-5p              | 3 |
| <i>circDGKI</i> | miR-148b-5p/6874-3p      | 2 |
| <i>circDGKI</i> | miR-150-3p               | 2 |
| <i>circDGKI</i> | miR-150-5p               | 1 |
| <i>circDGKI</i> | miR-153-5p               | 1 |
| <i>circDGKI</i> | miR-155-3p               | 1 |
| <i>circDGKI</i> | miR-15a-3p               | 1 |
| <i>circDGKI</i> | miR-15b-3p               | 1 |
| <i>circDGKI</i> | miR-1825                 | 2 |
| <i>circDGKI</i> | miR-183-3p               | 1 |
| <i>circDGKI</i> | miR-183-5p.2             | 1 |
| <i>circDGKI</i> | miR-186-5p               | 2 |
| <i>circDGKI</i> | miR-187-5p               | 3 |
| <i>circDGKI</i> | miR-19-3p                | 1 |
| <i>circDGKI</i> | miR-191-3p               | 1 |
| <i>circDGKI</i> | miR-1914-5p              | 4 |
| <i>circDGKI</i> | miR-1915-5p              | 1 |
| <i>circDGKI</i> | miR-1972                 | 1 |

|                 |                     |   |
|-----------------|---------------------|---|
| <i>circDGKI</i> | miR-199-5p          | 2 |
| <i>circDGKI</i> | miR-203b-3p         | 1 |
| <i>circDGKI</i> | miR-205-3p          | 2 |
| <i>circDGKI</i> | miR-2053            | 2 |
| <i>circDGKI</i> | miR-208-5p          | 2 |
| <i>circDGKI</i> | miR-20b-3p          | 1 |
| <i>circDGKI</i> | miR-210-3p          | 1 |
| <i>circDGKI</i> | miR-2114-5p         | 1 |
| <i>circDGKI</i> | miR-2115-5p         | 2 |
| <i>circDGKI</i> | miR-2116-3p         | 1 |
| <i>circDGKI</i> | miR-212-5p          | 1 |
| <i>circDGKI</i> | miR-214-5p          | 1 |
| <i>circDGKI</i> | miR-217             | 1 |
| <i>circDGKI</i> | miR-218-5p          | 1 |
| <i>circDGKI</i> | miR-219a-2-3p       | 1 |
| <i>circDGKI</i> | miR-219b-3p         | 1 |
| <i>circDGKI</i> | miR-223-3p          | 1 |
| <i>circDGKI</i> | miR-223-5p          | 1 |
| <i>circDGKI</i> | miR-224-5p          | 2 |
| <i>circDGKI</i> | miR-2276-3p         | 1 |
| <i>circDGKI</i> | miR-2276-5p         | 1 |
| <i>circDGKI</i> | miR-2278            | 1 |
| <i>circDGKI</i> | miR-2392            | 2 |
| <i>circDGKI</i> | miR-26-5p           | 2 |
| <i>circDGKI</i> | miR-2682-3p/6781-3p | 1 |
| <i>circDGKI</i> | miR-27a-5p          | 2 |
| <i>circDGKI</i> | miR-28-5p/708-5p    | 1 |
| <i>circDGKI</i> | miR-299-3p          | 2 |
| <i>circDGKI</i> | miR-30-3p           | 1 |
| <i>circDGKI</i> | miR-301a-5p/301b-5p | 1 |
| <i>circDGKI</i> | miR-302b-5p/302d-5p | 1 |
| <i>circDGKI</i> | miR-31-3p           | 1 |
| <i>circDGKI</i> | miR-31-5p           | 1 |
| <i>circDGKI</i> | miR-3124-3p         | 1 |
| <i>circDGKI</i> | miR-3133            | 2 |
| <i>circDGKI</i> | miR-3135b           | 3 |
| <i>circDGKI</i> | miR-3137            | 1 |
| <i>circDGKI</i> | miR-3140-5p         | 2 |

|                 |                           |   |
|-----------------|---------------------------|---|
| <i>circDGKI</i> | miR-3144-3p               | 1 |
| <i>circDGKI</i> | miR-3147                  | 1 |
| <i>circDGKI</i> | miR-3149                  | 2 |
| <i>circDGKI</i> | miR-3150b-3p              | 1 |
| <i>circDGKI</i> | miR-3151-5p               | 2 |
| <i>circDGKI</i> | miR-3152-5p               | 1 |
| <i>circDGKI</i> | miR-3159                  | 1 |
| <i>circDGKI</i> | miR-3161                  | 1 |
| <i>circDGKI</i> | miR-3168                  | 2 |
| <i>circDGKI</i> | miR-3173-3p/6891-5p       | 3 |
| <i>circDGKI</i> | miR-3176/3922-3p          | 1 |
| <i>circDGKI</i> | miR-3179                  | 1 |
| <i>circDGKI</i> | miR-3180-5p               | 2 |
| <i>circDGKI</i> | miR-3183/4723-3p/6769b-3p | 1 |
| <i>circDGKI</i> | miR-3184-3p               | 1 |
| <i>circDGKI</i> | miR-3189-3p               | 1 |
| <i>circDGKI</i> | miR-3189-5p               | 1 |
| <i>circDGKI</i> | miR-3190-5p               | 1 |
| <i>circDGKI</i> | miR-3198/4309             | 2 |
| <i>circDGKI</i> | miR-3202                  | 1 |
| <i>circDGKI</i> | miR-326                   | 2 |
| <i>circDGKI</i> | miR-328-3p                | 1 |
| <i>circDGKI</i> | miR-335-5p                | 2 |
| <i>circDGKI</i> | miR-339-5p                | 1 |
| <i>circDGKI</i> | miR-33a-3p                | 2 |
| <i>circDGKI</i> | miR-345-3p                | 2 |
| <i>circDGKI</i> | miR-3605-5p               | 1 |
| <i>circDGKI</i> | miR-3607-5p               | 2 |
| <i>circDGKI</i> | miR-3613-5p               | 2 |
| <i>circDGKI</i> | miR-3614-3p               | 1 |
| <i>circDGKI</i> | miR-3616-3p               | 1 |
| <i>circDGKI</i> | miR-3653-3p               | 1 |
| <i>circDGKI</i> | miR-3658                  | 1 |
| <i>circDGKI</i> | miR-3671                  | 1 |
| <i>circDGKI</i> | miR-3675-3p               | 1 |
| <i>circDGKI</i> | miR-3675-5p               | 1 |
| <i>circDGKI</i> | miR-3682-5p               | 1 |
| <i>circDGKI</i> | miR-3684                  | 1 |

|                 |                                   |   |
|-----------------|-----------------------------------|---|
| <i>circDGKI</i> | miR-3689a-5p/3689b-5p/3689e/3689f | 1 |
| <i>circDGKI</i> | miR-3691-5p                       | 1 |
| <i>circDGKI</i> | miR-376c-3p                       | 1 |
| <i>circDGKI</i> | miR-377-3p                        | 1 |
| <i>circDGKI</i> | miR-382-5p                        | 2 |
| <i>circDGKI</i> | miR-3907                          | 1 |
| <i>circDGKI</i> | miR-3919                          | 3 |
| <i>circDGKI</i> | miR-3921/4653-5p                  | 1 |
| <i>circDGKI</i> | miR-3923                          | 1 |
| <i>circDGKI</i> | miR-3924                          | 2 |
| <i>circDGKI</i> | miR-3925-3p                       | 1 |
| <i>circDGKI</i> | miR-3926                          | 2 |
| <i>circDGKI</i> | miR-3934-5p                       | 2 |
| <i>circDGKI</i> | miR-3944-5p                       | 1 |
| <i>circDGKI</i> | miR-3960/8072                     | 1 |
| <i>circDGKI</i> | miR-3973                          | 1 |
| <i>circDGKI</i> | miR-3977                          | 3 |
| <i>circDGKI</i> | miR-3978                          | 1 |
| <i>circDGKI</i> | miR-411-3p                        | 2 |
| <i>circDGKI</i> | miR-423-5p                        | 1 |
| <i>circDGKI</i> | miR-4256                          | 1 |
| <i>circDGKI</i> | miR-4259                          | 1 |
| <i>circDGKI</i> | miR-4260                          | 1 |
| <i>circDGKI</i> | miR-4263                          | 3 |
| <i>circDGKI</i> | miR-4265/4296/4322                | 1 |
| <i>circDGKI</i> | miR-4267                          | 1 |
| <i>circDGKI</i> | miR-4268                          | 1 |
| <i>circDGKI</i> | miR-4272                          | 1 |
| <i>circDGKI</i> | miR-4283                          | 2 |
| <i>circDGKI</i> | miR-4285                          | 1 |
| <i>circDGKI</i> | miR-4290                          | 1 |
| <i>circDGKI</i> | miR-4292/6791-5p                  | 2 |
| <i>circDGKI</i> | miR-4293                          | 1 |
| <i>circDGKI</i> | miR-4294                          | 1 |
| <i>circDGKI</i> | miR-4302                          | 2 |
| <i>circDGKI</i> | miR-4303                          | 1 |
| <i>circDGKI</i> | miR-4307                          | 1 |
| <i>circDGKI</i> | miR-4308                          | 2 |

|                 |                    |   |
|-----------------|--------------------|---|
| <i>circDGKI</i> | miR-431-3p         | 1 |
| <i>circDGKI</i> | miR-4312           | 1 |
| <i>circDGKI</i> | miR-4314           | 2 |
| <i>circDGKI</i> | miR-4317           | 1 |
| <i>circDGKI</i> | miR-432-3p         | 2 |
| <i>circDGKI</i> | miR-432-5p         | 3 |
| <i>circDGKI</i> | miR-4324           | 1 |
| <i>circDGKI</i> | miR-4327           | 1 |
| <i>circDGKI</i> | miR-4425           | 1 |
| <i>circDGKI</i> | miR-4427           | 2 |
| <i>circDGKI</i> | miR-4428           | 3 |
| <i>circDGKI</i> | miR-4433a-3p       | 2 |
| <i>circDGKI</i> | miR-4433a-5p       | 1 |
| <i>circDGKI</i> | miR-4433b-5p       | 2 |
| <i>circDGKI</i> | miR-4434/4516/5703 | 4 |
| <i>circDGKI</i> | miR-4436b-5p       | 2 |
| <i>circDGKI</i> | miR-4447/4472      | 2 |
| <i>circDGKI</i> | miR-4448           | 1 |
| <i>circDGKI</i> | miR-4452           | 1 |
| <i>circDGKI</i> | miR-4454           | 1 |
| <i>circDGKI</i> | miR-4459           | 2 |
| <i>circDGKI</i> | miR-4471/8059      | 2 |
| <i>circDGKI</i> | miR-4473           | 1 |
| <i>circDGKI</i> | miR-4476/6876-5p   | 1 |
| <i>circDGKI</i> | miR-4481/4745-5p   | 1 |
| <i>circDGKI</i> | miR-4485-5p        | 1 |
| <i>circDGKI</i> | miR-4489           | 2 |
| <i>circDGKI</i> | miR-4491/4657      | 2 |
| <i>circDGKI</i> | miR-4493           | 1 |
| <i>circDGKI</i> | miR-4495           | 2 |
| <i>circDGKI</i> | miR-450-5p         | 1 |
| <i>circDGKI</i> | miR-4502           | 2 |
| <i>circDGKI</i> | miR-4503           | 1 |
| <i>circDGKI</i> | miR-450a-2-3p      | 1 |
| <i>circDGKI</i> | miR-4511           | 3 |
| <i>circDGKI</i> | miR-4512           | 1 |
| <i>circDGKI</i> | miR-4515           | 1 |
| <i>circDGKI</i> | miR-451b           | 1 |



|                 |                       |   |
|-----------------|-----------------------|---|
| <i>circDGKI</i> | miR-452-3p            | 1 |
| <i>circDGKI</i> | miR-4520-2-3p         | 1 |
| <i>circDGKI</i> | miR-4529-3p           | 1 |
| <i>circDGKI</i> | miR-4529-5p           | 1 |
| <i>circDGKI</i> | miR-4533              | 1 |
| <i>circDGKI</i> | miR-4536-5p           | 1 |
| <i>circDGKI</i> | miR-4633-3p/6500-5p   | 1 |
| <i>circDGKI</i> | miR-4635              | 2 |
| <i>circDGKI</i> | miR-4640-5p           | 2 |
| <i>circDGKI</i> | miR-4641              | 1 |
| <i>circDGKI</i> | miR-4649-3p           | 2 |
| <i>circDGKI</i> | miR-4650-5p           | 1 |
| <i>circDGKI</i> | miR-4653-3p           | 1 |
| <i>circDGKI</i> | miR-4659a-3p/4659b-3p | 3 |
| <i>circDGKI</i> | miR-466               | 1 |
| <i>circDGKI</i> | miR-4661-3p           | 1 |
| <i>circDGKI</i> | miR-4670-3p           | 2 |
| <i>circDGKI</i> | miR-4671-3p           | 1 |
| <i>circDGKI</i> | miR-4680-3p           | 2 |
| <i>circDGKI</i> | miR-4680-5p           | 2 |
| <i>circDGKI</i> | miR-4681              | 1 |
| <i>circDGKI</i> | miR-4686              | 1 |
| <i>circDGKI</i> | miR-4687-5p           | 3 |
| <i>circDGKI</i> | miR-4688/6743-5p      | 1 |
| <i>circDGKI</i> | miR-4690-3p/5685      | 1 |
| <i>circDGKI</i> | miR-4693-3p           | 1 |
| <i>circDGKI</i> | miR-4696              | 1 |
| <i>circDGKI</i> | miR-4697-3p           | 1 |
| <i>circDGKI</i> | miR-4700-3p           | 1 |
| <i>circDGKI</i> | miR-4703-3p           | 1 |
| <i>circDGKI</i> | miR-4704-3p           | 2 |
| <i>circDGKI</i> | miR-4707-5p           | 1 |
| <i>circDGKI</i> | miR-4711-3p           | 1 |
| <i>circDGKI</i> | miR-4713-5p           | 1 |
| <i>circDGKI</i> | miR-4715-5p           | 1 |
| <i>circDGKI</i> | miR-4716-5p           | 3 |
| <i>circDGKI</i> | miR-4717-5p           | 1 |
| <i>circDGKI</i> | miR-4721              | 1 |

|                 |                     |   |
|-----------------|---------------------|---|
| <i>circDGKI</i> | miR-4724-5p         | 1 |
| <i>circDGKI</i> | miR-4727-5p         | 1 |
| <i>circDGKI</i> | miR-4732-3p         | 2 |
| <i>circDGKI</i> | miR-4733-5p         | 1 |
| <i>circDGKI</i> | miR-4738-3p         | 1 |
| <i>circDGKI</i> | miR-4738-5p         | 1 |
| <i>circDGKI</i> | miR-4740-5p         | 1 |
| <i>circDGKI</i> | miR-4752            | 1 |
| <i>circDGKI</i> | miR-4755-3p         | 1 |
| <i>circDGKI</i> | miR-4756-3p         | 3 |
| <i>circDGKI</i> | miR-4757-5p/6744-3p | 1 |
| <i>circDGKI</i> | miR-4758-3p         | 1 |
| <i>circDGKI</i> | miR-4762-3p         | 1 |
| <i>circDGKI</i> | miR-4762-5p         | 4 |
| <i>circDGKI</i> | miR-4763-5p         | 1 |
| <i>circDGKI</i> | miR-4768-3p         | 2 |
| <i>circDGKI</i> | miR-4772-3p         | 1 |
| <i>circDGKI</i> | miR-4773            | 2 |
| <i>circDGKI</i> | miR-4774-3p         | 1 |
| <i>circDGKI</i> | miR-4777-3p         | 1 |
| <i>circDGKI</i> | miR-4777-5p         | 1 |
| <i>circDGKI</i> | miR-4778-3p         | 2 |
| <i>circDGKI</i> | miR-4780            | 1 |
| <i>circDGKI</i> | miR-4793-5p         | 1 |
| <i>circDGKI</i> | miR-4802-3p         | 1 |
| <i>circDGKI</i> | miR-486-5p          | 1 |
| <i>circDGKI</i> | miR-487a-5p/487b-5p | 2 |
| <i>circDGKI</i> | miR-491-5p          | 2 |
| <i>circDGKI</i> | miR-492             | 3 |
| <i>circDGKI</i> | miR-493-5p          | 3 |
| <i>circDGKI</i> | miR-495-3p          | 2 |
| <i>circDGKI</i> | miR-495-5p          | 2 |
| <i>circDGKI</i> | miR-5000-5p         | 1 |
| <i>circDGKI</i> | miR-5001-3p         | 1 |
| <i>circDGKI</i> | miR-5002-5p         | 2 |
| <i>circDGKI</i> | miR-5004-3p         | 3 |
| <i>circDGKI</i> | miR-5006-5p         | 1 |
| <i>circDGKI</i> | miR-503-3p          | 1 |

|                 |                                                                    |   |
|-----------------|--------------------------------------------------------------------|---|
| <i>circDGKI</i> | miR-509-3-5p/509-5p/4418                                           | 1 |
| <i>circDGKI</i> | miR-5092                                                           | 1 |
| <i>circDGKI</i> | miR-5094                                                           | 1 |
| <i>circDGKI</i> | miR-5095/7151-3p                                                   | 1 |
| <i>circDGKI</i> | miR-510-5p                                                         | 1 |
| <i>circDGKI</i> | miR-516a-3p/516b-3p/7162-5p                                        | 2 |
| <i>circDGKI</i> | miR-5187-3p                                                        | 2 |
| <i>circDGKI</i> | miR-5188                                                           | 1 |
| <i>circDGKI</i> | miR-5189-3p                                                        | 1 |
| <i>circDGKI</i> | miR-518a-5p/527                                                    | 1 |
| <i>circDGKI</i> | miR-518c-5p                                                        | 2 |
| <i>circDGKI</i> | miR-518d-5p/519-5p                                                 | 1 |
| <i>circDGKI</i> | miR-5194                                                           | 1 |
| <i>circDGKI</i> | miR-5196-3p                                                        | 1 |
| <i>circDGKI</i> | miR-520g-3p                                                        | 1 |
| <i>circDGKI</i> | miR-520g-5p                                                        | 1 |
| <i>circDGKI</i> | miR-532-3p                                                         | 1 |
| <i>circDGKI</i> | miR-539-5p                                                         | 2 |
| <i>circDGKI</i> | miR-544b                                                           | 1 |
| <i>circDGKI</i> | miR-548al/4445-3p                                                  | 1 |
| <i>circDGKI</i> | miR-548at-5p                                                       | 2 |
| <i>circDGKI</i> | miR-548av-3p                                                       | 1 |
| <i>circDGKI</i> | miR-548av-5p/548k/8054                                             | 1 |
| <i>circDGKI</i> | miR-548aw                                                          | 1 |
| <i>circDGKI</i> | miR-548ay-5p/548au-5p/548as-5p/548ar-5p/548aq-5p/548ap-5p/548am-5p | 1 |
| <i>circDGKI</i> | miR-548b-3p                                                        | 3 |
| <i>circDGKI</i> | miR-548e-5p                                                        | 1 |
| <i>circDGKI</i> | miR-548l                                                           | 1 |
| <i>circDGKI</i> | miR-548p                                                           | 2 |
| <i>circDGKI</i> | miR-5571-3p                                                        | 1 |
| <i>circDGKI</i> | miR-5571-5p                                                        | 1 |
| <i>circDGKI</i> | miR-5572                                                           | 1 |
| <i>circDGKI</i> | miR-5579-5p                                                        | 1 |
| <i>circDGKI</i> | miR-5581-3p                                                        | 4 |
| <i>circDGKI</i> | miR-5584-3p                                                        | 2 |
| <i>circDGKI</i> | miR-5585-3p                                                        | 1 |
| <i>circDGKI</i> | miR-5586-3p                                                        | 1 |
| <i>circDGKI</i> | miR-5587-3p                                                        | 1 |

|                 |                  |   |
|-----------------|------------------|---|
| <i>circDGKI</i> | miR-5588-3p      | 1 |
| <i>circDGKI</i> | miR-5591-3p      | 1 |
| <i>circDGKI</i> | miR-561-3p       | 2 |
| <i>circDGKI</i> | miR-567          | 2 |
| <i>circDGKI</i> | miR-568          | 2 |
| <i>circDGKI</i> | miR-5680         | 1 |
| <i>circDGKI</i> | miR-5681b        | 1 |
| <i>circDGKI</i> | miR-5692a        | 1 |
| <i>circDGKI</i> | miR-5696         | 1 |
| <i>circDGKI</i> | miR-5699-5p      | 1 |
| <i>circDGKI</i> | miR-570-3p       | 1 |
| <i>circDGKI</i> | miR-5701         | 2 |
| <i>circDGKI</i> | miR-573/3616-5p  | 2 |
| <i>circDGKI</i> | miR-575/4676-5p  | 1 |
| <i>circDGKI</i> | miR-576-3p       | 1 |
| <i>circDGKI</i> | miR-576-5p       | 3 |
| <i>circDGKI</i> | miR-579-3p       | 1 |
| <i>circDGKI</i> | miR-582-3p       | 2 |
| <i>circDGKI</i> | miR-582-5p       | 1 |
| <i>circDGKI</i> | miR-584-3p       | 2 |
| <i>circDGKI</i> | miR-587          | 2 |
| <i>circDGKI</i> | miR-589-3p       | 1 |
| <i>circDGKI</i> | miR-589-5p       | 3 |
| <i>circDGKI</i> | miR-596          | 1 |
| <i>circDGKI</i> | miR-605-3p       | 1 |
| <i>circDGKI</i> | miR-606          | 1 |
| <i>circDGKI</i> | miR-6068         | 1 |
| <i>circDGKI</i> | miR-607          | 1 |
| <i>circDGKI</i> | miR-6072/6891-3p | 1 |
| <i>circDGKI</i> | miR-6077         | 3 |
| <i>circDGKI</i> | miR-6079         | 2 |
| <i>circDGKI</i> | miR-6080         | 1 |
| <i>circDGKI</i> | miR-6083         | 1 |
| <i>circDGKI</i> | miR-6085/6813-5p | 1 |
| <i>circDGKI</i> | miR-6090         | 1 |
| <i>circDGKI</i> | miR-610          | 1 |
| <i>circDGKI</i> | miR-6125         | 1 |
| <i>circDGKI</i> | miR-6128         | 2 |

|                 |                     |   |
|-----------------|---------------------|---|
| <i>circDGKI</i> | miR-615-5p          | 1 |
| <i>circDGKI</i> | miR-616-3p          | 2 |
| <i>circDGKI</i> | miR-617             | 1 |
| <i>circDGKI</i> | miR-618             | 1 |
| <i>circDGKI</i> | miR-624-3p          | 1 |
| <i>circDGKI</i> | miR-624-5p          | 1 |
| <i>circDGKI</i> | miR-629-3p          | 2 |
| <i>circDGKI</i> | miR-630             | 1 |
| <i>circDGKI</i> | miR-632/4288        | 1 |
| <i>circDGKI</i> | miR-634             | 1 |
| <i>circDGKI</i> | miR-636             | 1 |
| <i>circDGKI</i> | miR-639             | 2 |
| <i>circDGKI</i> | miR-642a-5p         | 1 |
| <i>circDGKI</i> | miR-643             | 1 |
| <i>circDGKI</i> | miR-6505-3p         | 1 |
| <i>circDGKI</i> | miR-6507-3p         | 1 |
| <i>circDGKI</i> | miR-6508-3p         | 2 |
| <i>circDGKI</i> | miR-6509-3p         | 2 |
| <i>circDGKI</i> | miR-6511-3p         | 1 |
| <i>circDGKI</i> | miR-6512-5p         | 1 |
| <i>circDGKI</i> | miR-6513-3p         | 3 |
| <i>circDGKI</i> | miR-6516-3p         | 1 |
| <i>circDGKI</i> | miR-652-3p          | 1 |
| <i>circDGKI</i> | miR-654-5p          | 2 |
| <i>circDGKI</i> | miR-659-5p          | 3 |
| <i>circDGKI</i> | miR-660-5p          | 1 |
| <i>circDGKI</i> | miR-664a-3p         | 1 |
| <i>circDGKI</i> | miR-664b-5p         | 1 |
| <i>circDGKI</i> | miR-665             | 1 |
| <i>circDGKI</i> | miR-670-5p          | 3 |
| <i>circDGKI</i> | miR-6728-3p         | 1 |
| <i>circDGKI</i> | miR-6729-3p         | 1 |
| <i>circDGKI</i> | miR-6732-3p         | 2 |
| <i>circDGKI</i> | miR-6733-3p         | 2 |
| <i>circDGKI</i> | miR-6735-3p         | 1 |
| <i>circDGKI</i> | miR-6741-3p         | 1 |
| <i>circDGKI</i> | miR-6742-5p         | 2 |
| <i>circDGKI</i> | miR-6751-5p/6803-5p | 3 |

|                 |                             |   |
|-----------------|-----------------------------|---|
| <i>circDGKI</i> | miR-6752-5p/6842-5p/7110-5p | 1 |
| <i>circDGKI</i> | miR-6757-3p                 | 3 |
| <i>circDGKI</i> | miR-6758-5p/6856-5p         | 2 |
| <i>circDGKI</i> | miR-6759-5p                 | 1 |
| <i>circDGKI</i> | miR-6762-5p/6845-5p         | 1 |
| <i>circDGKI</i> | miR-6764-3p/6824-3p         | 2 |
| <i>circDGKI</i> | miR-6769a-5p/6769b-5p       | 2 |
| <i>circDGKI</i> | miR-6770-5p                 | 3 |
| <i>circDGKI</i> | miR-6771-3p                 | 4 |
| <i>circDGKI</i> | miR-6772-3p                 | 2 |
| <i>circDGKI</i> | miR-6776-5p                 | 1 |
| <i>circDGKI</i> | miR-6778-3p                 | 2 |
| <i>circDGKI</i> | miR-6779-3p                 | 3 |
| <i>circDGKI</i> | miR-6780a-3p                | 2 |
| <i>circDGKI</i> | miR-6780b-3p                | 1 |
| <i>circDGKI</i> | miR-6784-3p/6862-3p         | 1 |
| <i>circDGKI</i> | miR-6786-5p                 | 1 |
| <i>circDGKI</i> | miR-6790-3p                 | 1 |
| <i>circDGKI</i> | miR-6791-3p/6829-3p         | 2 |
| <i>circDGKI</i> | miR-6792-5p                 | 1 |
| <i>circDGKI</i> | miR-6793-3p                 | 1 |
| <i>circDGKI</i> | miR-6796-5p                 | 1 |
| <i>circDGKI</i> | miR-6800-3p                 | 2 |
| <i>circDGKI</i> | miR-6802-3p                 | 1 |
| <i>circDGKI</i> | miR-6807-5p                 | 1 |
| <i>circDGKI</i> | miR-6809-5p                 | 1 |
| <i>circDGKI</i> | miR-6811-3p                 | 1 |
| <i>circDGKI</i> | miR-6815-3p                 | 2 |
| <i>circDGKI</i> | miR-6815-5p/6865-5p         | 1 |
| <i>circDGKI</i> | miR-6818-5p                 | 1 |
| <i>circDGKI</i> | miR-6821-3p                 | 1 |
| <i>circDGKI</i> | miR-6821-5p                 | 1 |
| <i>circDGKI</i> | miR-6830-3p                 | 1 |
| <i>circDGKI</i> | miR-6830-5p                 | 1 |
| <i>circDGKI</i> | miR-6833-5p                 | 1 |
| <i>circDGKI</i> | miR-6835-5p                 | 1 |
| <i>circDGKI</i> | miR-6836-3p                 | 2 |
| <i>circDGKI</i> | miR-6838-3p                 | 1 |

|                 |                     |   |
|-----------------|---------------------|---|
| <i>circDGKI</i> | miR-6840-5p         | 1 |
| <i>circDGKI</i> | miR-6841-3p         | 1 |
| <i>circDGKI</i> | miR-6844            | 2 |
| <i>circDGKI</i> | miR-6846-5p/6848-5p | 2 |
| <i>circDGKI</i> | miR-6853-3p         | 2 |
| <i>circDGKI</i> | miR-6853-5p         | 1 |
| <i>circDGKI</i> | miR-6858-3p         | 1 |
| <i>circDGKI</i> | miR-6861-3p         | 3 |
| <i>circDGKI</i> | miR-6861-5p         | 1 |
| <i>circDGKI</i> | miR-6867-3p         | 1 |
| <i>circDGKI</i> | miR-6870-3p         | 1 |
| <i>circDGKI</i> | miR-6872-3p         | 2 |
| <i>circDGKI</i> | miR-6873-5p         | 2 |
| <i>circDGKI</i> | miR-6875-3p         | 3 |
| <i>circDGKI</i> | miR-6878-3p         | 2 |
| <i>circDGKI</i> | miR-6881-3p         | 2 |
| <i>circDGKI</i> | miR-6888-3p         | 1 |
| <i>circDGKI</i> | miR-6888-5p         | 2 |
| <i>circDGKI</i> | miR-6890-5p         | 1 |
| <i>circDGKI</i> | miR-6892-3p         | 1 |
| <i>circDGKI</i> | miR-6895-5p         | 1 |
| <i>circDGKI</i> | miR-7-5p            | 3 |
| <i>circDGKI</i> | miR-708-3p          | 1 |
| <i>circDGKI</i> | miR-7109-5p         | 3 |
| <i>circDGKI</i> | miR-7111-3p         | 2 |
| <i>circDGKI</i> | miR-7114-5p         | 3 |
| <i>circDGKI</i> | miR-7151-5p         | 2 |
| <i>circDGKI</i> | miR-7156-3p         | 2 |
| <i>circDGKI</i> | miR-7158-3p         | 1 |
| <i>circDGKI</i> | miR-7160-3p         | 1 |
| <i>circDGKI</i> | miR-7162-3p         | 2 |
| <i>circDGKI</i> | miR-7515            | 1 |
| <i>circDGKI</i> | miR-766-3p          | 1 |
| <i>circDGKI</i> | miR-767-3p          | 2 |
| <i>circDGKI</i> | miR-7704            | 1 |
| <i>circDGKI</i> | miR-7847-3p         | 2 |
| <i>circDGKI</i> | miR-7850-5p         | 2 |
| <i>circDGKI</i> | miR-7975            | 1 |

|                 |                                    |   |
|-----------------|------------------------------------|---|
| <i>circDGKI</i> | miR-8056                           | 1 |
| <i>circDGKI</i> | miR-8069                           | 1 |
| <i>circDGKI</i> | miR-873-3p                         | 2 |
| <i>circDGKI</i> | miR-874-5p                         | 1 |
| <i>circDGKI</i> | miR-875-5p                         | 1 |
| <i>circDGKI</i> | miR-876-5p                         | 2 |
| <i>circDGKI</i> | miR-888-5p                         | 1 |
| <i>circDGKI</i> | miR-890                            | 2 |
| <i>circDGKI</i> | miR-920/4300/5591-5p/6726-5p       | 1 |
| <i>circDGKI</i> | miR-92a-1-5p                       | 1 |
| <i>circDGKI</i> | miR-92a-2-5p                       | 2 |
| <i>circDGKI</i> | miR-95-5p                          | 2 |
| <i>circDGKI</i> | miR-10-5p                          | 1 |
| <i>circDGKI</i> | miR-124-5p                         | 1 |
| <i>circDGKI</i> | miR-1276                           | 2 |
| <i>circDGKI</i> | miR-20a-3p                         | 1 |
| <i>circDGKI</i> | miR-23-3p                          | 1 |
| <i>circDGKI</i> | miR-2355-3p                        | 1 |
| <i>circDGKI</i> | miR-3126-5p                        | 1 |
| <i>circDGKI</i> | miR-338-5p                         | 1 |
| <i>circDGKI</i> | miR-370-3p                         | 2 |
| <i>circDGKI</i> | miR-382-3p                         | 1 |
| <i>circDGKI</i> | miR-4258                           | 1 |
| <i>circDGKI</i> | miR-4301                           | 1 |
| <i>circDGKI</i> | miR-4311                           | 2 |
| <i>circDGKI</i> | miR-4419a/4510/6127/6129/6130/6133 | 1 |
| <i>circDGKI</i> | miR-4449                           | 1 |
| <i>circDGKI</i> | miR-4477b                          | 1 |
| <i>circDGKI</i> | miR-4646-3p                        | 1 |
| <i>circDGKI</i> | miR-504-5p.1                       | 1 |
| <i>circDGKI</i> | miR-5096                           | 1 |
| <i>circDGKI</i> | miR-513b-5p                        | 1 |
| <i>circDGKI</i> | miR-541-5p                         | 1 |
| <i>circDGKI</i> | miR-583                            | 2 |
| <i>circDGKI</i> | miR-6757-5p                        | 1 |
| <i>circDGKI</i> | miR-6847-3p                        | 1 |
| <i>circDGKI</i> | miR-7108-3p                        | 1 |
| <i>circDGKI</i> | miR-7973                           | 1 |



|                 |                                      |   |
|-----------------|--------------------------------------|---|
| <i>circDGKI</i> | miR-101-3p.1                         | 1 |
| <i>circDGKI</i> | miR-128-3p                           | 1 |
| <i>circDGKI</i> | miR-140-3p.1                         | 1 |
| <i>circDGKI</i> | miR-144-3p                           | 1 |
| <i>circDGKI</i> | miR-1468-3p                          | 1 |
| <i>circDGKI</i> | miR-2117                             | 1 |
| <i>circDGKI</i> | miR-338-3p                           | 1 |
| <i>circDGKI</i> | miR-34a-3p                           | 1 |
| <i>circDGKI</i> | miR-361-5p                           | 1 |
| <i>circDGKI</i> | miR-3617-3p                          | 1 |
| <i>circDGKI</i> | miR-4326                             | 1 |
| <i>circDGKI</i> | miR-4474-3p                          | 3 |
| <i>circDGKI</i> | miR-4530                             | 1 |
| <i>circDGKI</i> | miR-548aj-5p/548f-5p/548g-5p/548x-5p | 1 |
| <i>circDGKI</i> | miR-548az-5p/548t-5p                 | 1 |
| <i>circDGKI</i> | miR-548n                             | 1 |
| <i>circDGKI</i> | miR-6720-5p                          | 2 |
| <i>circDGKI</i> | miR-7108-5p                          | 3 |
| <i>circDGKI</i> | miR-22-3p                            | 1 |
| <i>circDGKI</i> | miR-3938                             | 1 |
| <i>circDGKI</i> | miR-105-5p                           | 1 |
| <i>circDGKI</i> | miR-1207-5p/4763-3p                  | 2 |
| <i>circDGKI</i> | miR-1228-3p                          | 1 |
| <i>circDGKI</i> | miR-1245b-5p                         | 1 |
| <i>circDGKI</i> | miR-1262/4701-3p/6736-5p             | 1 |
| <i>circDGKI</i> | miR-1269                             | 1 |
| <i>circDGKI</i> | miR-1286                             | 1 |
| <i>circDGKI</i> | miR-1298-3p                          | 1 |
| <i>circDGKI</i> | miR-133a-3p.1                        | 1 |
| <i>circDGKI</i> | miR-145-3p                           | 1 |
| <i>circDGKI</i> | miR-15-5p/16-5p/195-5p/424-5p/497-5p | 1 |
| <i>circDGKI</i> | miR-181-3p/4420                      | 1 |
| <i>circDGKI</i> | miR-198                              | 1 |
| <i>circDGKI</i> | miR-21-3p/3591-3p                    | 2 |
| <i>circDGKI</i> | miR-216a-5p                          | 1 |
| <i>circDGKI</i> | miR-216b-5p                          | 1 |
| <i>circDGKI</i> | miR-30-5p                            | 1 |
| <i>circDGKI</i> | miR-3074-5p                          | 1 |

|                 |                       |   |
|-----------------|-----------------------|---|
| <i>circDGKI</i> | miR-3126-3p           | 1 |
| <i>circDGKI</i> | miR-3130-3p           | 1 |
| <i>circDGKI</i> | miR-3154              | 1 |
| <i>circDGKI</i> | miR-3171              | 1 |
| <i>circDGKI</i> | miR-3186-5p           | 1 |
| <i>circDGKI</i> | miR-3200-3p           | 1 |
| <i>circDGKI</i> | miR-33-5p             | 1 |
| <i>circDGKI</i> | miR-330-3p.2          | 1 |
| <i>circDGKI</i> | miR-337-5p            | 1 |
| <i>circDGKI</i> | miR-34b-3p            | 1 |
| <i>circDGKI</i> | miR-34c-3p            | 1 |
| <i>circDGKI</i> | miR-3607-3p           | 2 |
| <i>circDGKI</i> | miR-3622a-3p/3622b-3p | 2 |
| <i>circDGKI</i> | miR-3686              | 1 |
| <i>circDGKI</i> | miR-3688-5p           | 1 |
| <i>circDGKI</i> | miR-3908              | 1 |
| <i>circDGKI</i> | miR-3911              | 1 |
| <i>circDGKI</i> | miR-3937              | 1 |
| <i>circDGKI</i> | miR-3942-5p           | 1 |
| <i>circDGKI</i> | miR-4274              | 1 |
| <i>circDGKI</i> | miR-4297/5581-5p      | 1 |
| <i>circDGKI</i> | miR-4310/7157-5p      | 1 |
| <i>circDGKI</i> | miR-4422              | 1 |
| <i>circDGKI</i> | miR-4438              | 1 |
| <i>circDGKI</i> | miR-4461              | 1 |
| <i>circDGKI</i> | miR-4468              | 1 |
| <i>circDGKI</i> | miR-4470              | 1 |
| <i>circDGKI</i> | miR-4480              | 1 |
| <i>circDGKI</i> | miR-4519              | 1 |
| <i>circDGKI</i> | miR-4532              | 1 |
| <i>circDGKI</i> | miR-4670-5p           | 1 |
| <i>circDGKI</i> | miR-4695-5p           | 3 |
| <i>circDGKI</i> | miR-4722-5p           | 1 |
| <i>circDGKI</i> | miR-4736              | 2 |
| <i>circDGKI</i> | miR-4761-5p           | 1 |
| <i>circDGKI</i> | miR-4775              | 2 |
| <i>circDGKI</i> | miR-4779              | 3 |
| <i>circDGKI</i> | miR-4786-5p           | 3 |

|                   |                  |   |
|-------------------|------------------|---|
| <i>circDGKI</i>   | miR-4790-3p      | 2 |
| <i>circDGKI</i>   | miR-4793-3p      | 1 |
| <i>circDGKI</i>   | miR-4795-5p      | 1 |
| <i>circDGKI</i>   | miR-5009-5p/8058 | 1 |
| <i>circDGKI</i>   | miR-503-5p       | 1 |
| <i>circDGKI</i>   | miR-561-5p       | 1 |
| <i>circDGKI</i>   | miR-595          | 1 |
| <i>circDGKI</i>   | miR-598-3p       | 1 |
| <i>circDGKI</i>   | miR-6078         | 1 |
| <i>circDGKI</i>   | miR-644a         | 1 |
| <i>circDGKI</i>   | miR-646          | 1 |
| <i>circDGKI</i>   | miR-647          | 2 |
| <i>circDGKI</i>   | miR-648          | 2 |
| <i>circDGKI</i>   | miR-6499-3p      | 1 |
| <i>circDGKI</i>   | miR-6501-3p      | 1 |
| <i>circDGKI</i>   | miR-6508-5p/8067 | 1 |
| <i>circDGKI</i>   | miR-653-3p       | 1 |
| <i>circDGKI</i>   | miR-6721-5p      | 1 |
| <i>circDGKI</i>   | miR-6736-3p      | 1 |
| <i>circDGKI</i>   | miR-6741-5p      | 1 |
| <i>circDGKI</i>   | miR-6746-5p      | 1 |
| <i>circDGKI</i>   | miR-6765-3p      | 2 |
| <i>circDGKI</i>   | miR-6783-5p      | 1 |
| <i>circDGKI</i>   | miR-6795-3p      | 1 |
| <i>circDGKI</i>   | miR-6813-3p      | 1 |
| <i>circDGKI</i>   | miR-6826-3p      | 1 |
| <i>circDGKI</i>   | miR-6842-3p      | 2 |
| <i>circDGKI</i>   | miR-6849-3p      | 1 |
| <i>circDGKI</i>   | miR-6887-3p      | 1 |
| <i>circDGKI</i>   | miR-7152-5p      | 1 |
| <i>circDGKI</i>   | miR-769-5p       | 3 |
| <i>circDGKI</i>   | miR-873-5p.2     | 1 |
| <i>circDGKI</i>   | miR-891a-3p      | 1 |
| <i>circDGKI</i>   | miR-9-5p         | 1 |
| <i>circDGKI</i>   | miR-3174         | 1 |
| <i>circDGKI</i>   | miR-580-3p       | 1 |
| <i>circDNAJC6</i> | let-7-5p/98-5p   | 1 |
| <i>circDNAJC6</i> | miR-103b         | 2 |

|                   |                     |   |
|-------------------|---------------------|---|
| <i>circDNAJC6</i> | miR-1197            | 2 |
| <i>circDNAJC6</i> | miR-1200            | 3 |
| <i>circDNAJC6</i> | miR-1226-5p         | 2 |
| <i>circDNAJC6</i> | miR-1231            | 4 |
| <i>circDNAJC6</i> | miR-1251-5p         | 1 |
| <i>circDNAJC6</i> | miR-1264            | 1 |
| <i>circDNAJC6</i> | miR-1270            | 1 |
| <i>circDNAJC6</i> | miR-1273f           | 1 |
| <i>circDNAJC6</i> | miR-1276            | 4 |
| <i>circDNAJC6</i> | miR-1299            | 5 |
| <i>circDNAJC6</i> | miR-1304-5p         | 2 |
| <i>circDNAJC6</i> | miR-1305            | 2 |
| <i>circDNAJC6</i> | miR-133a-5p         | 1 |
| <i>circDNAJC6</i> | miR-136-5p          | 2 |
| <i>circDNAJC6</i> | miR-138-5p          | 1 |
| <i>circDNAJC6</i> | miR-139-3p          | 1 |
| <i>circDNAJC6</i> | miR-142-3p.1        | 3 |
| <i>circDNAJC6</i> | miR-143-3p          | 1 |
| <i>circDNAJC6</i> | miR-145-3p          | 3 |
| <i>circDNAJC6</i> | miR-146a-3p         | 3 |
| <i>circDNAJC6</i> | miR-154-5p          | 2 |
| <i>circDNAJC6</i> | miR-1587/3620-5p    | 2 |
| <i>circDNAJC6</i> | miR-182-5p          | 3 |
| <i>circDNAJC6</i> | miR-1827            | 1 |
| <i>circDNAJC6</i> | miR-194-5p          | 1 |
| <i>circDNAJC6</i> | miR-198             | 2 |
| <i>circDNAJC6</i> | miR-203b-5p/6718-5p | 3 |
| <i>circDNAJC6</i> | miR-204-5p/211-5p   | 1 |
| <i>circDNAJC6</i> | miR-208-3p          | 3 |
| <i>circDNAJC6</i> | miR-2113            | 1 |
| <i>circDNAJC6</i> | miR-2114-3p         | 2 |
| <i>circDNAJC6</i> | miR-216a-5p         | 1 |
| <i>circDNAJC6</i> | miR-216b-5p         | 1 |
| <i>circDNAJC6</i> | miR-219-5p          | 4 |
| <i>circDNAJC6</i> | miR-219b-5p         | 3 |
| <i>circDNAJC6</i> | miR-2355-3p         | 4 |
| <i>circDNAJC6</i> | miR-26-5p           | 2 |
| <i>circDNAJC6</i> | miR-2681-5p         | 2 |

|                   |                       |   |
|-------------------|-----------------------|---|
| <i>circDNAJC6</i> | miR-27-3p             | 1 |
| <i>circDNAJC6</i> | miR-3064-5p           | 3 |
| <i>circDNAJC6</i> | miR-3074-5p           | 3 |
| <i>circDNAJC6</i> | miR-3121-5p           | 1 |
| <i>circDNAJC6</i> | miR-3125/3916/6859-5p | 2 |
| <i>circDNAJC6</i> | miR-3130-3p           | 2 |
| <i>circDNAJC6</i> | miR-3140-5p           | 3 |
| <i>circDNAJC6</i> | miR-3143              | 1 |
| <i>circDNAJC6</i> | miR-3149              | 4 |
| <i>circDNAJC6</i> | miR-3184-3p           | 1 |
| <i>circDNAJC6</i> | miR-320               | 3 |
| <i>circDNAJC6</i> | miR-337-3p            | 3 |
| <i>circDNAJC6</i> | miR-338-5p            | 1 |
| <i>circDNAJC6</i> | miR-34-5p/449-5p      | 3 |
| <i>circDNAJC6</i> | miR-345-3p            | 3 |
| <i>circDNAJC6</i> | miR-34b-3p            | 1 |
| <i>circDNAJC6</i> | miR-34c-3p            | 1 |
| <i>circDNAJC6</i> | miR-361-3p            | 2 |
| <i>circDNAJC6</i> | miR-3611              | 3 |
| <i>circDNAJC6</i> | miR-3613-3p           | 3 |
| <i>circDNAJC6</i> | miR-3622a-5p          | 1 |
| <i>circDNAJC6</i> | miR-3663-5p           | 1 |
| <i>circDNAJC6</i> | miR-3689d/6851-5p     | 1 |
| <i>circDNAJC6</i> | miR-378a-5p           | 3 |
| <i>circDNAJC6</i> | miR-378g              | 2 |
| <i>circDNAJC6</i> | miR-382-5p            | 2 |
| <i>circDNAJC6</i> | miR-3912-5p           | 2 |
| <i>circDNAJC6</i> | miR-3913-3p           | 2 |
| <i>circDNAJC6</i> | miR-3920              | 3 |
| <i>circDNAJC6</i> | miR-3928-3p           | 2 |
| <i>circDNAJC6</i> | miR-3929/4419b/4478   | 1 |
| <i>circDNAJC6</i> | miR-409-5p            | 2 |
| <i>circDNAJC6</i> | miR-421               | 3 |
| <i>circDNAJC6</i> | miR-4257              | 2 |
| <i>circDNAJC6</i> | miR-4277              | 3 |
| <i>circDNAJC6</i> | miR-4287/4685-3p      | 3 |
| <i>circDNAJC6</i> | miR-4289              | 3 |
| <i>circDNAJC6</i> | miR-4311              | 4 |

|                   |                     |   |
|-------------------|---------------------|---|
| <i>circDNAJC6</i> | miR-4318            | 3 |
| <i>circDNAJC6</i> | miR-4426/4647/4662b | 5 |
| <i>circDNAJC6</i> | miR-4427            | 3 |
| <i>circDNAJC6</i> | miR-4432            | 3 |
| <i>circDNAJC6</i> | miR-4437            | 2 |
| <i>circDNAJC6</i> | miR-4443            | 1 |
| <i>circDNAJC6</i> | miR-4445-5p         | 4 |
| <i>circDNAJC6</i> | miR-4455            | 2 |
| <i>circDNAJC6</i> | miR-4460            | 3 |
| <i>circDNAJC6</i> | miR-4469            | 3 |
| <i>circDNAJC6</i> | miR-4486            | 2 |
| <i>circDNAJC6</i> | miR-4496            | 2 |
| <i>circDNAJC6</i> | miR-4504            | 3 |
| <i>circDNAJC6</i> | miR-4509            | 2 |
| <i>circDNAJC6</i> | miR-4531            | 1 |
| <i>circDNAJC6</i> | miR-4639-3p         | 1 |
| <i>circDNAJC6</i> | miR-4646-3p         | 4 |
| <i>circDNAJC6</i> | miR-4674            | 2 |
| <i>circDNAJC6</i> | miR-4677-3p         | 3 |
| <i>circDNAJC6</i> | miR-4679            | 3 |
| <i>circDNAJC6</i> | miR-4680-3p         | 3 |
| <i>circDNAJC6</i> | miR-4683            | 1 |
| <i>circDNAJC6</i> | miR-4687-3p         | 3 |
| <i>circDNAJC6</i> | miR-4693-5p         | 3 |
| <i>circDNAJC6</i> | miR-4699-5p         | 2 |
| <i>circDNAJC6</i> | miR-4708-5p         | 1 |
| <i>circDNAJC6</i> | miR-4711-3p         | 4 |
| <i>circDNAJC6</i> | miR-4713-5p         | 1 |
| <i>circDNAJC6</i> | miR-4714-3p         | 3 |
| <i>circDNAJC6</i> | miR-4716-5p         | 4 |
| <i>circDNAJC6</i> | miR-4727-3p         | 3 |
| <i>circDNAJC6</i> | miR-4731-5p         | 2 |
| <i>circDNAJC6</i> | miR-4738-3p         | 3 |
| <i>circDNAJC6</i> | miR-4744            | 2 |
| <i>circDNAJC6</i> | miR-4777-5p         | 1 |
| <i>circDNAJC6</i> | miR-4778-5p         | 1 |
| <i>circDNAJC6</i> | miR-4782-5p/5706    | 5 |
| <i>circDNAJC6</i> | miR-4786-5p         | 2 |

|                   |                     |   |
|-------------------|---------------------|---|
| <i>circDNAJC6</i> | miR-4793-3p         | 2 |
| <i>circDNAJC6</i> | miR-4799-5p         | 1 |
| <i>circDNAJC6</i> | miR-4803            | 1 |
| <i>circDNAJC6</i> | miR-484/3155        | 1 |
| <i>circDNAJC6</i> | miR-490-3p          | 3 |
| <i>circDNAJC6</i> | miR-495-5p          | 2 |
| <i>circDNAJC6</i> | miR-498             | 2 |
| <i>circDNAJC6</i> | miR-499a-3p/499b-3p | 2 |
| <i>circDNAJC6</i> | miR-499a-5p         | 3 |
| <i>circDNAJC6</i> | miR-500a-3p         | 2 |
| <i>circDNAJC6</i> | miR-500a-5p         | 3 |
| <i>circDNAJC6</i> | miR-5010-3p         | 1 |
| <i>circDNAJC6</i> | miR-505-3p.1        | 3 |
| <i>circDNAJC6</i> | miR-505-3p.2        | 3 |
| <i>circDNAJC6</i> | miR-508-3p          | 4 |
| <i>circDNAJC6</i> | miR-511-3p          | 2 |
| <i>circDNAJC6</i> | miR-511-5p          | 4 |
| <i>circDNAJC6</i> | miR-513a-5p         | 1 |
| <i>circDNAJC6</i> | miR-513b-3p         | 3 |
| <i>circDNAJC6</i> | miR-513b-5p         | 1 |
| <i>circDNAJC6</i> | miR-516b-5p         | 5 |
| <i>circDNAJC6</i> | miR-517-5p          | 1 |
| <i>circDNAJC6</i> | miR-5187-3p         | 3 |
| <i>circDNAJC6</i> | miR-518d-5p/519-5p  | 1 |
| <i>circDNAJC6</i> | miR-5193            | 2 |
| <i>circDNAJC6</i> | miR-5197-3p         | 1 |
| <i>circDNAJC6</i> | miR-525-5p          | 2 |
| <i>circDNAJC6</i> | miR-542-3p          | 3 |
| <i>circDNAJC6</i> | miR-543             | 3 |
| <i>circDNAJC6</i> | miR-545-3p          | 3 |
| <i>circDNAJC6</i> | miR-548au-3p        | 3 |
| <i>circDNAJC6</i> | miR-548e-5p         | 3 |
| <i>circDNAJC6</i> | miR-548g-3p         | 3 |
| <i>circDNAJC6</i> | miR-5571-5p         | 1 |
| <i>circDNAJC6</i> | miR-5581-3p         | 2 |
| <i>circDNAJC6</i> | miR-5582-5p         | 1 |
| <i>circDNAJC6</i> | miR-5587-5p         | 4 |
| <i>circDNAJC6</i> | miR-5589-5p         | 2 |

|                   |                                      |   |
|-------------------|--------------------------------------|---|
| <i>circDNAJC6</i> | miR-568                              | 3 |
| <i>circDNAJC6</i> | miR-5681a                            | 2 |
| <i>circDNAJC6</i> | miR-5683                             | 4 |
| <i>circDNAJC6</i> | miR-5684                             | 1 |
| <i>circDNAJC6</i> | miR-573/3616-5p                      | 1 |
| <i>circDNAJC6</i> | miR-576-3p                           | 5 |
| <i>circDNAJC6</i> | miR-583                              | 4 |
| <i>circDNAJC6</i> | miR-592                              | 1 |
| <i>circDNAJC6</i> | miR-593-5p                           | 1 |
| <i>circDNAJC6</i> | miR-599                              | 1 |
| <i>circDNAJC6</i> | miR-6073                             | 3 |
| <i>circDNAJC6</i> | miR-609                              | 2 |
| <i>circDNAJC6</i> | miR-612/1285-3p/3187-5p/5189-5p/6860 | 2 |
| <i>circDNAJC6</i> | miR-6128                             | 3 |
| <i>circDNAJC6</i> | miR-6131                             | 1 |
| <i>circDNAJC6</i> | miR-623                              | 1 |
| <i>circDNAJC6</i> | miR-632/4288                         | 4 |
| <i>circDNAJC6</i> | miR-649                              | 3 |
| <i>circDNAJC6</i> | miR-6505-5p                          | 3 |
| <i>circDNAJC6</i> | miR-6508-5p/8067                     | 1 |
| <i>circDNAJC6</i> | miR-6509-5p                          | 5 |
| <i>circDNAJC6</i> | miR-6515-5p                          | 1 |
| <i>circDNAJC6</i> | miR-653-5p                           | 3 |
| <i>circDNAJC6</i> | miR-654-3p                           | 4 |
| <i>circDNAJC6</i> | miR-660-3p                           | 2 |
| <i>circDNAJC6</i> | miR-670-5p                           | 2 |
| <i>circDNAJC6</i> | miR-6730-5p                          | 2 |
| <i>circDNAJC6</i> | miR-6734-5p                          | 2 |
| <i>circDNAJC6</i> | miR-6752-3p                          | 2 |
| <i>circDNAJC6</i> | miR-6755-3p                          | 2 |
| <i>circDNAJC6</i> | miR-676-3p                           | 2 |
| <i>circDNAJC6</i> | miR-6765-5p                          | 1 |
| <i>circDNAJC6</i> | miR-6772-5p                          | 2 |
| <i>circDNAJC6</i> | miR-6778-3p                          | 2 |
| <i>circDNAJC6</i> | miR-6790-3p                          | 2 |
| <i>circDNAJC6</i> | miR-6791-3p/6829-3p                  | 2 |
| <i>circDNAJC6</i> | miR-6794-3p                          | 1 |
| <i>circDNAJC6</i> | miR-6800-5p                          | 3 |



|                   |                     |   |
|-------------------|---------------------|---|
| <i>circDNAJC6</i> | miR-6802-5p         | 3 |
| <i>circDNAJC6</i> | miR-6804-3p         | 2 |
| <i>circDNAJC6</i> | miR-6804-5p         | 2 |
| <i>circDNAJC6</i> | miR-6816-3p         | 2 |
| <i>circDNAJC6</i> | miR-6819-3p/6877-3p | 2 |
| <i>circDNAJC6</i> | miR-6821-3p         | 2 |
| <i>circDNAJC6</i> | miR-6830-3p         | 4 |
| <i>circDNAJC6</i> | miR-6832-3p         | 1 |
| <i>circDNAJC6</i> | miR-6834-5p         | 2 |
| <i>circDNAJC6</i> | miR-6844            | 2 |
| <i>circDNAJC6</i> | miR-6847-5p         | 2 |
| <i>circDNAJC6</i> | miR-6867-3p         | 1 |
| <i>circDNAJC6</i> | miR-7113-3p         | 3 |
| <i>circDNAJC6</i> | miR-7150            | 3 |
| <i>circDNAJC6</i> | miR-7152-3p         | 1 |
| <i>circDNAJC6</i> | miR-7152-5p         | 3 |
| <i>circDNAJC6</i> | miR-7153-3p         | 2 |
| <i>circDNAJC6</i> | miR-7159-5p         | 3 |
| <i>circDNAJC6</i> | miR-769-5p          | 2 |
| <i>circDNAJC6</i> | miR-7705            | 2 |
| <i>circDNAJC6</i> | miR-7974            | 3 |
| <i>circDNAJC6</i> | miR-8055            | 2 |
| <i>circDNAJC6</i> | miR-8080            | 2 |
| <i>circDNAJC6</i> | miR-8087            | 3 |
| <i>circDNAJC6</i> | miR-890             | 3 |
| <i>circDNAJC6</i> | miR-892a            | 3 |
| <i>circDNAJC6</i> | miR-95-5p           | 1 |
| <i>circDNAJC6</i> | miR-96-5p/1271-5p   | 3 |
| <i>circDOCK1</i>  | miR-10-5p           | 5 |
| <i>circDOCK1</i>  | miR-100-3p          | 1 |
| <i>circDOCK1</i>  | miR-103-3p/107      | 3 |
| <i>circDOCK1</i>  | miR-103a-2-5p       | 3 |
| <i>circDOCK1</i>  | miR-1178-5p         | 2 |
| <i>circDOCK1</i>  | miR-1180-5p         | 2 |
| <i>circDOCK1</i>  | miR-1182            | 2 |
| <i>circDOCK1</i>  | miR-1183            | 1 |
| <i>circDOCK1</i>  | miR-1184            | 4 |
| <i>circDOCK1</i>  | miR-1193            | 4 |

|                  |                    |   |
|------------------|--------------------|---|
| <i>circDOCK1</i> | miR-1200           | 3 |
| <i>circDOCK1</i> | miR-1205           | 4 |
| <i>circDOCK1</i> | miR-1206           | 2 |
| <i>circDOCK1</i> | miR-1207-3p        | 3 |
| <i>circDOCK1</i> | miR-1208           | 6 |
| <i>circDOCK1</i> | miR-122-3p         | 2 |
| <i>circDOCK1</i> | miR-122-5p         | 1 |
| <i>circDOCK1</i> | miR-1224-3p        | 1 |
| <i>circDOCK1</i> | miR-1224-5p        | 2 |
| <i>circDOCK1</i> | miR-1226-3p        | 5 |
| <i>circDOCK1</i> | miR-1226-5p        | 2 |
| <i>circDOCK1</i> | miR-1229-3p        | 2 |
| <i>circDOCK1</i> | miR-1231           | 2 |
| <i>circDOCK1</i> | miR-1233-3p        | 5 |
| <i>circDOCK1</i> | miR-1237-3p        | 2 |
| <i>circDOCK1</i> | miR-1238-3p        | 2 |
| <i>circDOCK1</i> | miR-124-5p         | 3 |
| <i>circDOCK1</i> | miR-1243           | 7 |
| <i>circDOCK1</i> | miR-1245a/8079     | 2 |
| <i>circDOCK1</i> | miR-1245b-3p       | 1 |
| <i>circDOCK1</i> | miR-1245b-5p       | 2 |
| <i>circDOCK1</i> | miR-1248           | 2 |
| <i>circDOCK1</i> | miR-125-5p         | 4 |
| <i>circDOCK1</i> | miR-1250-3p        | 2 |
| <i>circDOCK1</i> | miR-1252-3p        | 2 |
| <i>circDOCK1</i> | miR-1252-5p        | 6 |
| <i>circDOCK1</i> | miR-1253           | 3 |
| <i>circDOCK1</i> | miR-1255a/1255b-5p | 2 |
| <i>circDOCK1</i> | miR-1255b-2-3p     | 2 |
| <i>circDOCK1</i> | miR-1256           | 1 |
| <i>circDOCK1</i> | miR-125a-3p        | 1 |
| <i>circDOCK1</i> | miR-126-3p.1       | 1 |
| <i>circDOCK1</i> | miR-126-3p.2       | 1 |
| <i>circDOCK1</i> | miR-1266-3p        | 3 |
| <i>circDOCK1</i> | miR-1269           | 2 |
| <i>circDOCK1</i> | miR-127-5p         | 1 |
| <i>circDOCK1</i> | miR-1272           | 1 |
| <i>circDOCK1</i> | miR-1273d          | 1 |

|                  |                   |   |
|------------------|-------------------|---|
| <i>circDOCK1</i> | miR-1273e         | 2 |
| <i>circDOCK1</i> | miR-1273g-3p      | 1 |
| <i>circDOCK1</i> | miR-1273g-5p      | 3 |
| <i>circDOCK1</i> | miR-1273h-3p      | 1 |
| <i>circDOCK1</i> | miR-1276          | 3 |
| <i>circDOCK1</i> | miR-1277-3p       | 1 |
| <i>circDOCK1</i> | miR-1277-5p       | 2 |
| <i>circDOCK1</i> | miR-128-3p        | 3 |
| <i>circDOCK1</i> | miR-1286          | 2 |
| <i>circDOCK1</i> | miR-129-3p        | 2 |
| <i>circDOCK1</i> | miR-129-5p        | 2 |
| <i>circDOCK1</i> | miR-1295b-5p/1912 | 2 |
| <i>circDOCK1</i> | miR-1299          | 1 |
| <i>circDOCK1</i> | miR-1301-3p       | 2 |
| <i>circDOCK1</i> | miR-1302/4298     | 1 |
| <i>circDOCK1</i> | miR-1304-3p       | 1 |
| <i>circDOCK1</i> | miR-1304-5p       | 3 |
| <i>circDOCK1</i> | miR-1306-5p       | 5 |
| <i>circDOCK1</i> | miR-1307-3p       | 1 |
| <i>circDOCK1</i> | miR-1322          | 1 |
| <i>circDOCK1</i> | miR-1323          | 3 |
| <i>circDOCK1</i> | miR-1324          | 2 |
| <i>circDOCK1</i> | miR-134-5p        | 7 |
| <i>circDOCK1</i> | miR-1343-3p       | 4 |
| <i>circDOCK1</i> | miR-136-5p        | 2 |
| <i>circDOCK1</i> | miR-138-2-3p      | 3 |
| <i>circDOCK1</i> | miR-139-5p        | 1 |
| <i>circDOCK1</i> | miR-140-3p.1      | 5 |
| <i>circDOCK1</i> | miR-140-3p.2      | 3 |
| <i>circDOCK1</i> | miR-140-5p        | 3 |
| <i>circDOCK1</i> | miR-141-3p/200-3p | 3 |
| <i>circDOCK1</i> | miR-142-5p        | 1 |
| <i>circDOCK1</i> | miR-143-5p        | 1 |
| <i>circDOCK1</i> | miR-145-3p        | 3 |
| <i>circDOCK1</i> | miR-146-5p        | 1 |
| <i>circDOCK1</i> | miR-146a-3p       | 8 |
| <i>circDOCK1</i> | miR-146b-3p       | 3 |
| <i>circDOCK1</i> | miR-148a-5p       | 5 |

|                  |                                      |    |
|------------------|--------------------------------------|----|
| <i>circDOCK1</i> | miR-148b-5p/6874-3p                  | 6  |
| <i>circDOCK1</i> | miR-149-3p/4728-5p/6785-5p/6883-5p   | 3  |
| <i>circDOCK1</i> | miR-149-5p                           | 2  |
| <i>circDOCK1</i> | miR-15-5p/16-5p/195-5p/424-5p/497-5p | 5  |
| <i>circDOCK1</i> | miR-151-3p                           | 1  |
| <i>circDOCK1</i> | miR-152-5p                           | 1  |
| <i>circDOCK1</i> | miR-17-3p                            | 4  |
| <i>circDOCK1</i> | miR-181-3p/4420                      | 2  |
| <i>circDOCK1</i> | miR-181-5p                           | 1  |
| <i>circDOCK1</i> | miR-182-3p                           | 1  |
| <i>circDOCK1</i> | miR-182-5p                           | 2  |
| <i>circDOCK1</i> | miR-1827                             | 2  |
| <i>circDOCK1</i> | miR-183-3p                           | 3  |
| <i>circDOCK1</i> | miR-183-5p.1                         | 1  |
| <i>circDOCK1</i> | miR-185-3p                           | 2  |
| <i>circDOCK1</i> | miR-186-5p                           | 6  |
| <i>circDOCK1</i> | miR-187-3p                           | 1  |
| <i>circDOCK1</i> | miR-18a-3p                           | 5  |
| <i>circDOCK1</i> | miR-19-3p                            | 2  |
| <i>circDOCK1</i> | miR-190a-3p                          | 1  |
| <i>circDOCK1</i> | miR-1910-3p/6511a-5p                 | 2  |
| <i>circDOCK1</i> | miR-1914-5p                          | 10 |
| <i>circDOCK1</i> | miR-192-5p/215-5p                    | 7  |
| <i>circDOCK1</i> | miR-194-3p                           | 1  |
| <i>circDOCK1</i> | miR-196-5p                           | 1  |
| <i>circDOCK1</i> | miR-196b-3p                          | 1  |
| <i>circDOCK1</i> | miR-198                              | 1  |
| <i>circDOCK1</i> | miR-200ab-5p                         | 1  |
| <i>circDOCK1</i> | miR-202-5p                           | 1  |
| <i>circDOCK1</i> | miR-203a-3p.1                        | 5  |
| <i>circDOCK1</i> | miR-203a-5p                          | 3  |
| <i>circDOCK1</i> | miR-203b-3p                          | 2  |
| <i>circDOCK1</i> | miR-203b-5p/6718-5p                  | 1  |
| <i>circDOCK1</i> | miR-204-5p/211-5p                    | 2  |
| <i>circDOCK1</i> | miR-205-3p                           | 7  |
| <i>circDOCK1</i> | miR-205-5p                           | 5  |
| <i>circDOCK1</i> | miR-2053                             | 2  |
| <i>circDOCK1</i> | miR-2054                             | 2  |

|                  |                                     |   |
|------------------|-------------------------------------|---|
| <i>circDOCK1</i> | miR-208-3p                          | 2 |
| <i>circDOCK1</i> | miR-20a-3p                          | 3 |
| <i>circDOCK1</i> | miR-21-5p/590-5p                    | 1 |
| <i>circDOCK1</i> | miR-2113                            | 1 |
| <i>circDOCK1</i> | miR-2115-5p                         | 1 |
| <i>circDOCK1</i> | miR-2116-5p                         | 2 |
| <i>circDOCK1</i> | miR-2117                            | 5 |
| <i>circDOCK1</i> | miR-212-5p                          | 1 |
| <i>circDOCK1</i> | miR-214-3p/3619-5p                  | 4 |
| <i>circDOCK1</i> | miR-215-3p                          | 1 |
| <i>circDOCK1</i> | miR-217                             | 4 |
| <i>circDOCK1</i> | miR-218-1-3p                        | 1 |
| <i>circDOCK1</i> | miR-218-2-3p                        | 1 |
| <i>circDOCK1</i> | miR-218-5p                          | 1 |
| <i>circDOCK1</i> | miR-219b-5p                         | 1 |
| <i>circDOCK1</i> | miR-22-3p                           | 2 |
| <i>circDOCK1</i> | miR-22-5p                           | 2 |
| <i>circDOCK1</i> | miR-221-3p/222-3p                   | 1 |
| <i>circDOCK1</i> | miR-221-5p/8073                     | 6 |
| <i>circDOCK1</i> | miR-222-5p                          | 1 |
| <i>circDOCK1</i> | miR-223-3p                          | 2 |
| <i>circDOCK1</i> | miR-223-5p                          | 1 |
| <i>circDOCK1</i> | miR-224-5p                          | 2 |
| <i>circDOCK1</i> | miR-2276-3p                         | 3 |
| <i>circDOCK1</i> | miR-2277-3p                         | 1 |
| <i>circDOCK1</i> | miR-2355-3p                         | 1 |
| <i>circDOCK1</i> | miR-2392                            | 1 |
| <i>circDOCK1</i> | miR-2467-3p                         | 2 |
| <i>circDOCK1</i> | miR-25-3p/32-5p/92-3p/363-3p/367-3p | 1 |
| <i>circDOCK1</i> | miR-26-3p                           | 1 |
| <i>circDOCK1</i> | miR-2681-3p                         | 2 |
| <i>circDOCK1</i> | miR-2681-5p                         | 2 |
| <i>circDOCK1</i> | miR-2682-3p/6781-3p                 | 1 |
| <i>circDOCK1</i> | miR-27-3p                           | 5 |
| <i>circDOCK1</i> | miR-27b-5p                          | 1 |
| <i>circDOCK1</i> | miR-29-3p                           | 2 |
| <i>circDOCK1</i> | miR-297                             | 1 |
| <i>circDOCK1</i> | miR-298                             | 1 |

|                  |                       |   |
|------------------|-----------------------|---|
| <i>circDOCK1</i> | miR-29a-5p            | 2 |
| <i>circDOCK1</i> | miR-29b-1-5p          | 2 |
| <i>circDOCK1</i> | miR-30-3p             | 3 |
| <i>circDOCK1</i> | miR-30-5p             | 5 |
| <i>circDOCK1</i> | miR-301a-5p/301b-5p   | 2 |
| <i>circDOCK1</i> | miR-302a-5p           | 3 |
| <i>circDOCK1</i> | miR-302b-5p/302d-5p   | 1 |
| <i>circDOCK1</i> | miR-302c-5p           | 2 |
| <i>circDOCK1</i> | miR-302f              | 1 |
| <i>circDOCK1</i> | miR-3064-5p           | 1 |
| <i>circDOCK1</i> | miR-3065-5p           | 2 |
| <i>circDOCK1</i> | miR-3074-5p           | 3 |
| <i>circDOCK1</i> | miR-3117-5p           | 1 |
| <i>circDOCK1</i> | miR-3120-5p           | 2 |
| <i>circDOCK1</i> | miR-3121-3p           | 2 |
| <i>circDOCK1</i> | miR-3123              | 5 |
| <i>circDOCK1</i> | miR-3124-3p           | 6 |
| <i>circDOCK1</i> | miR-3125/3916/6859-5p | 1 |
| <i>circDOCK1</i> | miR-3126-5p           | 3 |
| <i>circDOCK1</i> | miR-3128              | 3 |
| <i>circDOCK1</i> | miR-3130-3p           | 1 |
| <i>circDOCK1</i> | miR-3130-5p/4482-5p   | 2 |
| <i>circDOCK1</i> | miR-3133              | 6 |
| <i>circDOCK1</i> | miR-3136-5p/4439      | 6 |
| <i>circDOCK1</i> | miR-3138              | 1 |
| <i>circDOCK1</i> | miR-3140-3p           | 2 |
| <i>circDOCK1</i> | miR-3140-5p           | 3 |
| <i>circDOCK1</i> | miR-3143              | 1 |
| <i>circDOCK1</i> | miR-3144-3p           | 1 |
| <i>circDOCK1</i> | miR-3145-3p           | 1 |
| <i>circDOCK1</i> | miR-3145-5p           | 5 |
| <i>circDOCK1</i> | miR-3149              | 1 |
| <i>circDOCK1</i> | miR-3150a-5p/3150b-5p | 2 |
| <i>circDOCK1</i> | miR-3151-3p           | 1 |
| <i>circDOCK1</i> | miR-3154              | 3 |
| <i>circDOCK1</i> | miR-3157-3p           | 1 |
| <i>circDOCK1</i> | miR-3158-5p           | 4 |
| <i>circDOCK1</i> | miR-3160-3p           | 1 |

|                  |                           |   |
|------------------|---------------------------|---|
| <i>circDOCK1</i> | miR-3160-5p               | 1 |
| <i>circDOCK1</i> | miR-3162-3p               | 1 |
| <i>circDOCK1</i> | miR-3163                  | 4 |
| <i>circDOCK1</i> | miR-3164                  | 7 |
| <i>circDOCK1</i> | miR-3165                  | 2 |
| <i>circDOCK1</i> | miR-3168                  | 6 |
| <i>circDOCK1</i> | miR-3169                  | 3 |
| <i>circDOCK1</i> | miR-3171                  | 1 |
| <i>circDOCK1</i> | miR-3173-5p               | 3 |
| <i>circDOCK1</i> | miR-3175                  | 1 |
| <i>circDOCK1</i> | miR-3177-5p               | 1 |
| <i>circDOCK1</i> | miR-3179                  | 2 |
| <i>circDOCK1</i> | miR-3180-5p               | 3 |
| <i>circDOCK1</i> | miR-3182                  | 3 |
| <i>circDOCK1</i> | miR-3183/4723-3p/6769b-3p | 2 |
| <i>circDOCK1</i> | miR-3186-3p               | 1 |
| <i>circDOCK1</i> | miR-3189-3p               | 1 |
| <i>circDOCK1</i> | miR-3191-5p               | 1 |
| <i>circDOCK1</i> | miR-3192-3p               | 2 |
| <i>circDOCK1</i> | miR-3194-3p               | 1 |
| <i>circDOCK1</i> | miR-32-3p                 | 2 |
| <i>circDOCK1</i> | miR-3200-5p               | 2 |
| <i>circDOCK1</i> | miR-3201/4791             | 2 |
| <i>circDOCK1</i> | miR-3202                  | 8 |
| <i>circDOCK1</i> | miR-323-3p                | 1 |
| <i>circDOCK1</i> | miR-323a-5p               | 1 |
| <i>circDOCK1</i> | miR-323b-3p               | 2 |
| <i>circDOCK1</i> | miR-324-3p/1913           | 5 |
| <i>circDOCK1</i> | miR-326                   | 1 |
| <i>circDOCK1</i> | miR-329-5p                | 2 |
| <i>circDOCK1</i> | miR-33-5p                 | 3 |
| <i>circDOCK1</i> | miR-331-3p                | 3 |
| <i>circDOCK1</i> | miR-331-5p                | 1 |
| <i>circDOCK1</i> | miR-335-3p                | 5 |
| <i>circDOCK1</i> | miR-337-3p                | 2 |
| <i>circDOCK1</i> | miR-338-3p                | 3 |
| <i>circDOCK1</i> | miR-339-5p                | 2 |
| <i>circDOCK1</i> | miR-340-5p                | 1 |

|                  |                                   |   |
|------------------|-----------------------------------|---|
| <i>circDOCK1</i> | miR-342-3p                        | 2 |
| <i>circDOCK1</i> | miR-345-3p                        | 3 |
| <i>circDOCK1</i> | miR-34b-3p                        | 1 |
| <i>circDOCK1</i> | miR-34b-5p/449c-5p                | 2 |
| <i>circDOCK1</i> | miR-34c-3p                        | 1 |
| <i>circDOCK1</i> | miR-3529-3p                       | 2 |
| <i>circDOCK1</i> | miR-3606-5p                       | 1 |
| <i>circDOCK1</i> | miR-3607-3p                       | 2 |
| <i>circDOCK1</i> | miR-3607-5p                       | 1 |
| <i>circDOCK1</i> | miR-3613-3p                       | 2 |
| <i>circDOCK1</i> | miR-3614-5p                       | 2 |
| <i>circDOCK1</i> | miR-3615                          | 1 |
| <i>circDOCK1</i> | miR-3619-3p                       | 4 |
| <i>circDOCK1</i> | miR-3622a-3p/3622b-3p             | 1 |
| <i>circDOCK1</i> | miR-3646                          | 2 |
| <i>circDOCK1</i> | miR-3649                          | 1 |
| <i>circDOCK1</i> | miR-365-3p                        | 2 |
| <i>circDOCK1</i> | miR-3654                          | 7 |
| <i>circDOCK1</i> | miR-3655                          | 2 |
| <i>circDOCK1</i> | miR-3657                          | 2 |
| <i>circDOCK1</i> | miR-3658                          | 2 |
| <i>circDOCK1</i> | miR-3659                          | 2 |
| <i>circDOCK1</i> | miR-3660/4526                     | 2 |
| <i>circDOCK1</i> | miR-3662                          | 3 |
| <i>circDOCK1</i> | miR-3663-3p                       | 5 |
| <i>circDOCK1</i> | miR-3664-5p                       | 4 |
| <i>circDOCK1</i> | miR-3667-3p                       | 1 |
| <i>circDOCK1</i> | miR-3670                          | 2 |
| <i>circDOCK1</i> | miR-3672/6864-3p                  | 3 |
| <i>circDOCK1</i> | miR-3675-3p                       | 1 |
| <i>circDOCK1</i> | miR-3677-3p                       | 2 |
| <i>circDOCK1</i> | miR-3678-3p                       | 1 |
| <i>circDOCK1</i> | miR-3680-5p                       | 3 |
| <i>circDOCK1</i> | miR-3682-5p                       | 1 |
| <i>circDOCK1</i> | miR-3685                          | 1 |
| <i>circDOCK1</i> | miR-3686                          | 1 |
| <i>circDOCK1</i> | miR-3688-3p                       | 3 |
| <i>circDOCK1</i> | miR-3689a-5p/3689b-5p/3689e/3689f | 2 |



|                  |                     |   |
|------------------|---------------------|---|
| <i>circDOCK1</i> | miR-3689d/6851-5p   | 1 |
| <i>circDOCK1</i> | miR-3690            | 2 |
| <i>circDOCK1</i> | miR-3691-3p         | 1 |
| <i>circDOCK1</i> | miR-3692-5p         | 3 |
| <i>circDOCK1</i> | miR-3713            | 1 |
| <i>circDOCK1</i> | miR-374-5p          | 1 |
| <i>circDOCK1</i> | miR-374b-3p         | 1 |
| <i>circDOCK1</i> | miR-376-3p          | 2 |
| <i>circDOCK1</i> | miR-377-3p          | 2 |
| <i>circDOCK1</i> | miR-377-5p/6086     | 2 |
| <i>circDOCK1</i> | miR-378-3p          | 3 |
| <i>circDOCK1</i> | miR-378a-5p         | 3 |
| <i>circDOCK1</i> | miR-378j/6839-5p    | 2 |
| <i>circDOCK1</i> | miR-381-3p          | 2 |
| <i>circDOCK1</i> | miR-383-5p.1        | 1 |
| <i>circDOCK1</i> | miR-383-5p.2        | 2 |
| <i>circDOCK1</i> | miR-384             | 1 |
| <i>circDOCK1</i> | miR-3908            | 1 |
| <i>circDOCK1</i> | miR-3912-5p         | 2 |
| <i>circDOCK1</i> | miR-3915            | 2 |
| <i>circDOCK1</i> | miR-3917            | 1 |
| <i>circDOCK1</i> | miR-3919            | 3 |
| <i>circDOCK1</i> | miR-3920            | 1 |
| <i>circDOCK1</i> | miR-3921/4653-5p    | 2 |
| <i>circDOCK1</i> | miR-3922-5p         | 3 |
| <i>circDOCK1</i> | miR-3924            | 1 |
| <i>circDOCK1</i> | miR-3925-3p         | 4 |
| <i>circDOCK1</i> | miR-3925-5p         | 5 |
| <i>circDOCK1</i> | miR-3927-3p/6831-5p | 1 |
| <i>circDOCK1</i> | miR-3928-3p         | 1 |
| <i>circDOCK1</i> | miR-3928-5p/6806-3p | 2 |
| <i>circDOCK1</i> | miR-3934-5p         | 1 |
| <i>circDOCK1</i> | miR-3936            | 2 |
| <i>circDOCK1</i> | miR-3938            | 2 |
| <i>circDOCK1</i> | miR-3942-3p         | 1 |
| <i>circDOCK1</i> | miR-3942-5p         | 1 |
| <i>circDOCK1</i> | miR-3944-5p         | 1 |
| <i>circDOCK1</i> | miR-3973            | 1 |

|                  |                  |   |
|------------------|------------------|---|
| <i>circDOCK1</i> | miR-3974         | 4 |
| <i>circDOCK1</i> | miR-3976         | 2 |
| <i>circDOCK1</i> | miR-3977         | 2 |
| <i>circDOCK1</i> | miR-3978         | 1 |
| <i>circDOCK1</i> | miR-409-3p       | 1 |
| <i>circDOCK1</i> | miR-410-3p       | 1 |
| <i>circDOCK1</i> | miR-421          | 2 |
| <i>circDOCK1</i> | miR-423-5p       | 1 |
| <i>circDOCK1</i> | miR-425-5p       | 2 |
| <i>circDOCK1</i> | miR-4252         | 3 |
| <i>circDOCK1</i> | miR-4254         | 2 |
| <i>circDOCK1</i> | miR-4256         | 1 |
| <i>circDOCK1</i> | miR-4261         | 4 |
| <i>circDOCK1</i> | miR-4263         | 2 |
| <i>circDOCK1</i> | miR-4268         | 1 |
| <i>circDOCK1</i> | miR-4272         | 7 |
| <i>circDOCK1</i> | miR-4273/7156-5p | 3 |
| <i>circDOCK1</i> | miR-4276         | 1 |
| <i>circDOCK1</i> | miR-4277         | 3 |
| <i>circDOCK1</i> | miR-4279         | 2 |
| <i>circDOCK1</i> | miR-4280         | 1 |
| <i>circDOCK1</i> | miR-4282         | 2 |
| <i>circDOCK1</i> | miR-4287/4685-3p | 3 |
| <i>circDOCK1</i> | miR-4291         | 3 |
| <i>circDOCK1</i> | miR-4292/6791-5p | 2 |
| <i>circDOCK1</i> | miR-4293         | 4 |
| <i>circDOCK1</i> | miR-4299         | 1 |
| <i>circDOCK1</i> | miR-4302         | 1 |
| <i>circDOCK1</i> | miR-4307         | 1 |
| <i>circDOCK1</i> | miR-4308         | 2 |
| <i>circDOCK1</i> | miR-431-3p       | 3 |
| <i>circDOCK1</i> | miR-4310/7157-5p | 3 |
| <i>circDOCK1</i> | miR-4311         | 3 |
| <i>circDOCK1</i> | miR-4312         | 1 |
| <i>circDOCK1</i> | miR-4318         | 2 |
| <i>circDOCK1</i> | miR-432-3p       | 1 |
| <i>circDOCK1</i> | miR-4324         | 3 |
| <i>circDOCK1</i> | miR-4326         | 1 |

|                  |                                    |   |
|------------------|------------------------------------|---|
| <i>circDOCK1</i> | miR-4327                           | 1 |
| <i>circDOCK1</i> | miR-4328                           | 1 |
| <i>circDOCK1</i> | miR-433-3p                         | 1 |
| <i>circDOCK1</i> | miR-4419a/4510/6127/6129/6130/6133 | 3 |
| <i>circDOCK1</i> | miR-4421/5699-3p                   | 3 |
| <i>circDOCK1</i> | miR-4423-5p                        | 1 |
| <i>circDOCK1</i> | miR-4426/4647/4662b                | 3 |
| <i>circDOCK1</i> | miR-4427                           | 2 |
| <i>circDOCK1</i> | miR-4432                           | 1 |
| <i>circDOCK1</i> | miR-4433a-3p                       | 2 |
| <i>circDOCK1</i> | miR-4433b-5p                       | 1 |
| <i>circDOCK1</i> | miR-4434/4516/5703                 | 2 |
| <i>circDOCK1</i> | miR-4436b-5p                       | 4 |
| <i>circDOCK1</i> | miR-4440                           | 1 |
| <i>circDOCK1</i> | miR-4446-5p                        | 6 |
| <i>circDOCK1</i> | miR-4448                           | 1 |
| <i>circDOCK1</i> | miR-4452                           | 3 |
| <i>circDOCK1</i> | miR-4456                           | 1 |
| <i>circDOCK1</i> | miR-4459                           | 2 |
| <i>circDOCK1</i> | miR-4463                           | 1 |
| <i>circDOCK1</i> | miR-4468                           | 2 |
| <i>circDOCK1</i> | miR-4469                           | 3 |
| <i>circDOCK1</i> | miR-4476/6876-5p                   | 8 |
| <i>circDOCK1</i> | miR-4480                           | 1 |
| <i>circDOCK1</i> | miR-4482-3p                        | 1 |
| <i>circDOCK1</i> | miR-4484                           | 1 |
| <i>circDOCK1</i> | miR-4487                           | 1 |
| <i>circDOCK1</i> | miR-4495                           | 2 |
| <i>circDOCK1</i> | miR-4496                           | 5 |
| <i>circDOCK1</i> | miR-4499                           | 1 |
| <i>circDOCK1</i> | miR-449c-3p                        | 1 |
| <i>circDOCK1</i> | miR-4502                           | 2 |
| <i>circDOCK1</i> | miR-4506                           | 1 |
| <i>circDOCK1</i> | miR-4517                           | 2 |
| <i>circDOCK1</i> | miR-452-3p                         | 2 |
| <i>circDOCK1</i> | miR-452-5p/892-3p                  | 4 |
| <i>circDOCK1</i> | miR-4520-2-3p                      | 2 |
| <i>circDOCK1</i> | miR-4520-3p                        | 1 |

|                  |                       |   |
|------------------|-----------------------|---|
| <i>circDOCK1</i> | miR-4524a-3p          | 2 |
| <i>circDOCK1</i> | miR-4524b-3p          | 3 |
| <i>circDOCK1</i> | miR-4529-3p           | 2 |
| <i>circDOCK1</i> | miR-4530              | 3 |
| <i>circDOCK1</i> | miR-4532              | 2 |
| <i>circDOCK1</i> | miR-4533              | 8 |
| <i>circDOCK1</i> | miR-4535              | 3 |
| <i>circDOCK1</i> | miR-4536-5p           | 1 |
| <i>circDOCK1</i> | miR-4539              | 2 |
| <i>circDOCK1</i> | miR-454-5p            | 1 |
| <i>circDOCK1</i> | miR-455-3p.2          | 1 |
| <i>circDOCK1</i> | miR-455-5p            | 3 |
| <i>circDOCK1</i> | miR-4637              | 1 |
| <i>circDOCK1</i> | miR-4638-3p           | 3 |
| <i>circDOCK1</i> | miR-4638-5p           | 1 |
| <i>circDOCK1</i> | miR-4639-3p           | 3 |
| <i>circDOCK1</i> | miR-4642              | 3 |
| <i>circDOCK1</i> | miR-4646-3p           | 1 |
| <i>circDOCK1</i> | miR-4649-3p           | 1 |
| <i>circDOCK1</i> | miR-4652-3p           | 2 |
| <i>circDOCK1</i> | miR-4659a-3p/4659b-3p | 3 |
| <i>circDOCK1</i> | miR-4659a-5p/4659b-5p | 1 |
| <i>circDOCK1</i> | miR-4660              | 4 |
| <i>circDOCK1</i> | miR-4662a-3p          | 1 |
| <i>circDOCK1</i> | miR-4663              | 4 |
| <i>circDOCK1</i> | miR-4666a-3p          | 2 |
| <i>circDOCK1</i> | miR-4668-3p           | 2 |
| <i>circDOCK1</i> | miR-4669              | 2 |
| <i>circDOCK1</i> | miR-4670-3p           | 9 |
| <i>circDOCK1</i> | miR-4677-3p           | 8 |
| <i>circDOCK1</i> | miR-4677-5p           | 3 |
| <i>circDOCK1</i> | miR-4679              | 8 |
| <i>circDOCK1</i> | miR-4680-3p           | 2 |
| <i>circDOCK1</i> | miR-4682              | 1 |
| <i>circDOCK1</i> | miR-4684-3p           | 2 |
| <i>circDOCK1</i> | miR-4684-5p           | 1 |
| <i>circDOCK1</i> | miR-4687-3p           | 1 |
| <i>circDOCK1</i> | miR-4687-5p           | 2 |

|                  |                                  |   |
|------------------|----------------------------------|---|
| <i>circDOCK1</i> | miR-4689/6858-5p                 | 2 |
| <i>circDOCK1</i> | miR-4690-5p                      | 1 |
| <i>circDOCK1</i> | miR-4691-3p                      | 6 |
| <i>circDOCK1</i> | miR-4691-5p/6792-3p              | 3 |
| <i>circDOCK1</i> | miR-4694-3p                      | 3 |
| <i>circDOCK1</i> | miR-4694-5p                      | 2 |
| <i>circDOCK1</i> | miR-4696                         | 1 |
| <i>circDOCK1</i> | miR-4697-3p                      | 2 |
| <i>circDOCK1</i> | miR-4698                         | 2 |
| <i>circDOCK1</i> | miR-4699-5p                      | 1 |
| <i>circDOCK1</i> | miR-4704-3p                      | 1 |
| <i>circDOCK1</i> | miR-4704-5p                      | 1 |
| <i>circDOCK1</i> | miR-4705                         | 1 |
| <i>circDOCK1</i> | miR-4709-3p                      | 2 |
| <i>circDOCK1</i> | miR-4709-5p                      | 1 |
| <i>circDOCK1</i> | miR-4711-3p                      | 1 |
| <i>circDOCK1</i> | miR-4712-3p                      | 3 |
| <i>circDOCK1</i> | miR-4713-5p                      | 5 |
| <i>circDOCK1</i> | miR-4714-3p                      | 2 |
| <i>circDOCK1</i> | miR-4714-5p                      | 4 |
| <i>circDOCK1</i> | miR-4716-3p/6794-5p              | 1 |
| <i>circDOCK1</i> | miR-4717-5p                      | 2 |
| <i>circDOCK1</i> | miR-4719                         | 4 |
| <i>circDOCK1</i> | miR-4720-3p                      | 1 |
| <i>circDOCK1</i> | miR-4720-5p/4799-3p/5588-5p      | 3 |
| <i>circDOCK1</i> | miR-4722-3p/6727-3p              | 8 |
| <i>circDOCK1</i> | miR-4722-5p                      | 2 |
| <i>circDOCK1</i> | miR-4723-5p/5698/6870-5p/7111-5p | 2 |
| <i>circDOCK1</i> | miR-4731-3p/4801                 | 1 |
| <i>circDOCK1</i> | miR-4732-3p                      | 4 |
| <i>circDOCK1</i> | miR-4732-5p                      | 1 |
| <i>circDOCK1</i> | miR-4733-3p                      | 5 |
| <i>circDOCK1</i> | miR-4733-5p                      | 1 |
| <i>circDOCK1</i> | miR-4738-5p                      | 5 |
| <i>circDOCK1</i> | miR-4740-3p                      | 4 |
| <i>circDOCK1</i> | miR-4742-3p                      | 1 |
| <i>circDOCK1</i> | miR-4743-3p                      | 2 |
| <i>circDOCK1</i> | miR-4750-3p                      | 1 |

|                  |                     |    |
|------------------|---------------------|----|
| <i>circDOCK1</i> | miR-4751            | 2  |
| <i>circDOCK1</i> | miR-4753-5p         | 4  |
| <i>circDOCK1</i> | miR-4755-5p/5006-3p | 2  |
| <i>circDOCK1</i> | miR-4756-3p         | 3  |
| <i>circDOCK1</i> | miR-4757-5p/6744-3p | 1  |
| <i>circDOCK1</i> | miR-4759            | 3  |
| <i>circDOCK1</i> | miR-4762-3p         | 2  |
| <i>circDOCK1</i> | miR-4762-5p         | 1  |
| <i>circDOCK1</i> | miR-4763-5p         | 3  |
| <i>circDOCK1</i> | miR-4764-3p         | 2  |
| <i>circDOCK1</i> | miR-4766-3p         | 1  |
| <i>circDOCK1</i> | miR-4768-3p         | 2  |
| <i>circDOCK1</i> | miR-4769-3p/6817-5p | 2  |
| <i>circDOCK1</i> | miR-4772-3p         | 3  |
| <i>circDOCK1</i> | miR-4772-5p         | 1  |
| <i>circDOCK1</i> | miR-4776-5p         | 3  |
| <i>circDOCK1</i> | miR-4777-5p         | 1  |
| <i>circDOCK1</i> | miR-4778-3p         | 5  |
| <i>circDOCK1</i> | miR-4778-5p         | 2  |
| <i>circDOCK1</i> | miR-4781-3p         | 1  |
| <i>circDOCK1</i> | miR-4782-5p/5706    | 1  |
| <i>circDOCK1</i> | miR-4790-3p         | 6  |
| <i>circDOCK1</i> | miR-4790-5p         | 1  |
| <i>circDOCK1</i> | miR-4793-3p         | 1  |
| <i>circDOCK1</i> | miR-4793-5p         | 3  |
| <i>circDOCK1</i> | miR-4796-5p         | 1  |
| <i>circDOCK1</i> | miR-4798-3p         | 3  |
| <i>circDOCK1</i> | miR-4798-5p         | 1  |
| <i>circDOCK1</i> | miR-4799-5p         | 1  |
| <i>circDOCK1</i> | miR-4800-5p         | 1  |
| <i>circDOCK1</i> | miR-4804-3p         | 1  |
| <i>circDOCK1</i> | miR-483-3p.2        | 3  |
| <i>circDOCK1</i> | miR-483-5p          | 1  |
| <i>circDOCK1</i> | miR-488-5p          | 2  |
| <i>circDOCK1</i> | miR-490-3p          | 1  |
| <i>circDOCK1</i> | miR-493-3p          | 11 |
| <i>circDOCK1</i> | miR-494-3p          | 3  |
| <i>circDOCK1</i> | miR-495-3p          | 2  |

|                  |                             |   |
|------------------|-----------------------------|---|
| <i>circDOCK1</i> | miR-496.1                   | 1 |
| <i>circDOCK1</i> | miR-496.2                   | 1 |
| <i>circDOCK1</i> | miR-497-3p                  | 3 |
| <i>circDOCK1</i> | miR-499a-5p                 | 2 |
| <i>circDOCK1</i> | miR-5000-3p                 | 1 |
| <i>circDOCK1</i> | miR-5000-5p                 | 2 |
| <i>circDOCK1</i> | miR-5002-5p                 | 2 |
| <i>circDOCK1</i> | miR-5003-3p                 | 3 |
| <i>circDOCK1</i> | miR-5003-5p                 | 1 |
| <i>circDOCK1</i> | miR-5004-5p                 | 2 |
| <i>circDOCK1</i> | miR-5007-3p                 | 3 |
| <i>circDOCK1</i> | miR-5008-3p/6737-3p/7157-3p | 2 |
| <i>circDOCK1</i> | miR-5009-5p/8058            | 2 |
| <i>circDOCK1</i> | miR-500a-5p                 | 2 |
| <i>circDOCK1</i> | miR-500b-3p                 | 2 |
| <i>circDOCK1</i> | miR-5010-3p                 | 1 |
| <i>circDOCK1</i> | miR-5010-5p                 | 2 |
| <i>circDOCK1</i> | miR-5011-5p                 | 2 |
| <i>circDOCK1</i> | miR-503-5p                  | 5 |
| <i>circDOCK1</i> | miR-504-5p.1                | 5 |
| <i>circDOCK1</i> | miR-505-3p.1                | 1 |
| <i>circDOCK1</i> | miR-505-3p.2                | 2 |
| <i>circDOCK1</i> | miR-508-5p                  | 5 |
| <i>circDOCK1</i> | miR-5088-3p                 | 2 |
| <i>circDOCK1</i> | miR-509-3-5p/509-5p/4418    | 4 |
| <i>circDOCK1</i> | miR-5093                    | 2 |
| <i>circDOCK1</i> | miR-510-3p                  | 6 |
| <i>circDOCK1</i> | miR-511-5p                  | 1 |
| <i>circDOCK1</i> | miR-513a-3p/513c-3p/3606-3p | 1 |
| <i>circDOCK1</i> | miR-513a-5p                 | 5 |
| <i>circDOCK1</i> | miR-513b-3p                 | 1 |
| <i>circDOCK1</i> | miR-513b-5p                 | 2 |
| <i>circDOCK1</i> | miR-513c-5p/514b-5p         | 3 |
| <i>circDOCK1</i> | miR-514a-5p                 | 4 |
| <i>circDOCK1</i> | miR-516a-3p/516b-3p/7162-5p | 1 |
| <i>circDOCK1</i> | miR-516b-5p                 | 1 |
| <i>circDOCK1</i> | miR-517-3p                  | 1 |
| <i>circDOCK1</i> | miR-5186                    | 1 |

|                  |                                                                    |   |
|------------------|--------------------------------------------------------------------|---|
| <i>circDOCK1</i> | miR-5187-3p                                                        | 2 |
| <i>circDOCK1</i> | miR-5187-5p                                                        | 2 |
| <i>circDOCK1</i> | miR-518a-5p/527                                                    | 2 |
| <i>circDOCK1</i> | miR-518c-5p                                                        | 1 |
| <i>circDOCK1</i> | miR-518d-5p/519-5p                                                 | 1 |
| <i>circDOCK1</i> | miR-5194                                                           | 1 |
| <i>circDOCK1</i> | miR-5196-3p                                                        | 3 |
| <i>circDOCK1</i> | miR-5197-5p                                                        | 7 |
| <i>circDOCK1</i> | miR-519d-5p                                                        | 3 |
| <i>circDOCK1</i> | miR-520f-5p                                                        | 3 |
| <i>circDOCK1</i> | miR-520g-3p                                                        | 1 |
| <i>circDOCK1</i> | miR-522-3p                                                         | 3 |
| <i>circDOCK1</i> | miR-524-5p                                                         | 3 |
| <i>circDOCK1</i> | miR-525-5p                                                         | 3 |
| <i>circDOCK1</i> | miR-526b-5p                                                        | 2 |
| <i>circDOCK1</i> | miR-539-5p                                                         | 5 |
| <i>circDOCK1</i> | miR-543                                                            | 1 |
| <i>circDOCK1</i> | miR-544a                                                           | 2 |
| <i>circDOCK1</i> | miR-544b                                                           | 3 |
| <i>circDOCK1</i> | miR-545-3p                                                         | 2 |
| <i>circDOCK1</i> | miR-545-5p                                                         | 1 |
| <i>circDOCK1</i> | miR-548ac/548bb-3p/548d-3p/548h-3p/548z                            | 2 |
| <i>circDOCK1</i> | miR-548ai/548ag/548ba/570-5p                                       | 5 |
| <i>circDOCK1</i> | miR-548al/4445-3p                                                  | 1 |
| <i>circDOCK1</i> | miR-548an                                                          | 1 |
| <i>circDOCK1</i> | miR-548aq-3p/548am-3p/548aj-3p/548ah-3p/548ae-3p/548j-3p/548x-3p   | 2 |
| <i>circDOCK1</i> | miR-548at-5p                                                       | 3 |
| <i>circDOCK1</i> | miR-548av-3p                                                       | 1 |
| <i>circDOCK1</i> | miR-548av-5p/548k/8054                                             | 1 |
| <i>circDOCK1</i> | miR-548aw                                                          | 2 |
| <i>circDOCK1</i> | miR-548ay-5p/548au-5p/548as-5p/548ar-5p/548aq-5p/548ap-5p/548am-5p | 2 |
| <i>circDOCK1</i> | miR-548az-3p/548ar-3p/548a-3p/548e-3p/548f-3p                      | 3 |
| <i>circDOCK1</i> | miR-548c-3p                                                        | 2 |
| <i>circDOCK1</i> | miR-548g-3p                                                        | 2 |
| <i>circDOCK1</i> | miR-548l                                                           | 1 |
| <i>circDOCK1</i> | miR-548m                                                           | 4 |
| <i>circDOCK1</i> | miR-548p                                                           | 4 |
| <i>circDOCK1</i> | miR-548q                                                           | 1 |



|                  |                  |   |
|------------------|------------------|---|
| <i>circDOCK1</i> | miR-548u/7161-5p | 3 |
| <i>circDOCK1</i> | miR-548v         | 1 |
| <i>circDOCK1</i> | miR-549a         | 1 |
| <i>circDOCK1</i> | miR-550b-2-5p    | 1 |
| <i>circDOCK1</i> | miR-551-3p       | 1 |
| <i>circDOCK1</i> | miR-551b-5p      | 3 |
| <i>circDOCK1</i> | miR-556-3p       | 1 |
| <i>circDOCK1</i> | miR-556-5p       | 3 |
| <i>circDOCK1</i> | miR-5571-5p      | 2 |
| <i>circDOCK1</i> | miR-558          | 1 |
| <i>circDOCK1</i> | miR-5581-3p      | 1 |
| <i>circDOCK1</i> | miR-5582-3p      | 3 |
| <i>circDOCK1</i> | miR-5583-3p      | 2 |
| <i>circDOCK1</i> | miR-5584-3p      | 6 |
| <i>circDOCK1</i> | miR-5584-5p      | 2 |
| <i>circDOCK1</i> | miR-5585-3p      | 2 |
| <i>circDOCK1</i> | miR-5586-3p      | 2 |
| <i>circDOCK1</i> | miR-5589-3p      | 1 |
| <i>circDOCK1</i> | miR-5590-5p      | 1 |
| <i>circDOCK1</i> | miR-561-3p       | 3 |
| <i>circDOCK1</i> | miR-568          | 1 |
| <i>circDOCK1</i> | miR-5680         | 6 |
| <i>circDOCK1</i> | miR-5684         | 2 |
| <i>circDOCK1</i> | miR-569          | 3 |
| <i>circDOCK1</i> | miR-5690         | 1 |
| <i>circDOCK1</i> | miR-5692a        | 1 |
| <i>circDOCK1</i> | miR-5693         | 1 |
| <i>circDOCK1</i> | miR-5694         | 2 |
| <i>circDOCK1</i> | miR-5695         | 3 |
| <i>circDOCK1</i> | miR-572          | 1 |
| <i>circDOCK1</i> | miR-574-5p       | 2 |
| <i>circDOCK1</i> | miR-576-3p       | 2 |
| <i>circDOCK1</i> | miR-576-5p       | 2 |
| <i>circDOCK1</i> | miR-580-3p       | 1 |
| <i>circDOCK1</i> | miR-580-5p       | 2 |
| <i>circDOCK1</i> | miR-583          | 3 |
| <i>circDOCK1</i> | miR-584-3p       | 1 |
| <i>circDOCK1</i> | miR-586          | 1 |

|                  |                  |   |
|------------------|------------------|---|
| <i>circDOCK1</i> | miR-587          | 1 |
| <i>circDOCK1</i> | miR-589-5p       | 1 |
| <i>circDOCK1</i> | miR-590-3p       | 2 |
| <i>circDOCK1</i> | miR-596          | 4 |
| <i>circDOCK1</i> | miR-597-3p       | 1 |
| <i>circDOCK1</i> | miR-602          | 1 |
| <i>circDOCK1</i> | miR-604          | 2 |
| <i>circDOCK1</i> | miR-6071         | 2 |
| <i>circDOCK1</i> | miR-6074         | 1 |
| <i>circDOCK1</i> | miR-6076/6797-3p | 2 |
| <i>circDOCK1</i> | miR-6077         | 5 |
| <i>circDOCK1</i> | miR-6079         | 2 |
| <i>circDOCK1</i> | miR-6082         | 1 |
| <i>circDOCK1</i> | miR-615-3p       | 2 |
| <i>circDOCK1</i> | miR-6165         | 1 |
| <i>circDOCK1</i> | miR-617          | 5 |
| <i>circDOCK1</i> | miR-618          | 3 |
| <i>circDOCK1</i> | miR-619-3p       | 2 |
| <i>circDOCK1</i> | miR-623          | 2 |
| <i>circDOCK1</i> | miR-624-3p       | 2 |
| <i>circDOCK1</i> | miR-625-5p       | 2 |
| <i>circDOCK1</i> | miR-627-3p       | 4 |
| <i>circDOCK1</i> | miR-628-5p       | 1 |
| <i>circDOCK1</i> | miR-629-3p       | 6 |
| <i>circDOCK1</i> | miR-630          | 1 |
| <i>circDOCK1</i> | miR-632/4288     | 2 |
| <i>circDOCK1</i> | miR-634          | 2 |
| <i>circDOCK1</i> | miR-640          | 1 |
| <i>circDOCK1</i> | miR-641/3617-5p  | 3 |
| <i>circDOCK1</i> | miR-642a-5p      | 1 |
| <i>circDOCK1</i> | miR-643          | 1 |
| <i>circDOCK1</i> | miR-646          | 5 |
| <i>circDOCK1</i> | miR-647          | 2 |
| <i>circDOCK1</i> | miR-649          | 1 |
| <i>circDOCK1</i> | miR-6500-3p      | 2 |
| <i>circDOCK1</i> | miR-6501-3p      | 3 |
| <i>circDOCK1</i> | miR-6501-5p      | 1 |
| <i>circDOCK1</i> | miR-6505-3p      | 5 |

|                  |                  |   |
|------------------|------------------|---|
| <i>circDOCK1</i> | miR-6507-3p      | 1 |
| <i>circDOCK1</i> | miR-6507-5p      | 4 |
| <i>circDOCK1</i> | miR-6508-5p/8067 | 2 |
| <i>circDOCK1</i> | miR-6509-3p      | 4 |
| <i>circDOCK1</i> | miR-6509-5p      | 1 |
| <i>circDOCK1</i> | miR-651-3p       | 7 |
| <i>circDOCK1</i> | miR-651-5p       | 2 |
| <i>circDOCK1</i> | miR-6510-3p      | 1 |
| <i>circDOCK1</i> | miR-6510-5p      | 1 |
| <i>circDOCK1</i> | miR-6511-5p      | 2 |
| <i>circDOCK1</i> | miR-6512-5p      | 1 |
| <i>circDOCK1</i> | miR-6516-3p      | 2 |
| <i>circDOCK1</i> | miR-6516-5p      | 3 |
| <i>circDOCK1</i> | miR-652-5p       | 4 |
| <i>circDOCK1</i> | miR-653-3p       | 2 |
| <i>circDOCK1</i> | miR-654-3p       | 1 |
| <i>circDOCK1</i> | miR-655-5p       | 2 |
| <i>circDOCK1</i> | miR-656-5p       | 2 |
| <i>circDOCK1</i> | miR-662          | 1 |
| <i>circDOCK1</i> | miR-664a-3p      | 2 |
| <i>circDOCK1</i> | miR-664a-5p/4794 | 2 |
| <i>circDOCK1</i> | miR-668-3p       | 1 |
| <i>circDOCK1</i> | miR-670-3p       | 2 |
| <i>circDOCK1</i> | miR-670-5p       | 2 |
| <i>circDOCK1</i> | miR-6715a-3p     | 3 |
| <i>circDOCK1</i> | miR-6716-5p      | 6 |
| <i>circDOCK1</i> | miR-6719-3p      | 2 |
| <i>circDOCK1</i> | miR-6720-5p      | 6 |
| <i>circDOCK1</i> | miR-6728-3p      | 3 |
| <i>circDOCK1</i> | miR-6730-3p      | 2 |
| <i>circDOCK1</i> | miR-6731-3p      | 1 |
| <i>circDOCK1</i> | miR-6732-5p      | 1 |
| <i>circDOCK1</i> | miR-6733-3p      | 1 |
| <i>circDOCK1</i> | miR-6734-3p      | 1 |
| <i>circDOCK1</i> | miR-6734-5p      | 2 |
| <i>circDOCK1</i> | miR-6736-3p      | 4 |
| <i>circDOCK1</i> | miR-6738-3p      | 2 |
| <i>circDOCK1</i> | miR-6741-3p      | 1 |

|                  |                     |   |
|------------------|---------------------|---|
| <i>circDOCK1</i> | miR-6744-5p         | 2 |
| <i>circDOCK1</i> | miR-6747-3p         | 8 |
| <i>circDOCK1</i> | miR-6748-3p         | 3 |
| <i>circDOCK1</i> | miR-6749-3p         | 3 |
| <i>circDOCK1</i> | miR-675-3p          | 1 |
| <i>circDOCK1</i> | miR-6750-3p         | 2 |
| <i>circDOCK1</i> | miR-6750-5p/6822-5p | 2 |
| <i>circDOCK1</i> | miR-6752-3p         | 5 |
| <i>circDOCK1</i> | miR-6753-5p         | 4 |
| <i>circDOCK1</i> | miR-6755-3p         | 1 |
| <i>circDOCK1</i> | miR-6757-3p         | 2 |
| <i>circDOCK1</i> | miR-6758-3p         | 1 |
| <i>circDOCK1</i> | miR-6759-3p         | 1 |
| <i>circDOCK1</i> | miR-676-5p          | 3 |
| <i>circDOCK1</i> | miR-6760-3p         | 6 |
| <i>circDOCK1</i> | miR-6762-3p         | 2 |
| <i>circDOCK1</i> | miR-6764-3p/6824-3p | 1 |
| <i>circDOCK1</i> | miR-6765-3p         | 1 |
| <i>circDOCK1</i> | miR-6765-5p         | 1 |
| <i>circDOCK1</i> | miR-6768-3p         | 1 |
| <i>circDOCK1</i> | miR-6770-5p         | 3 |
| <i>circDOCK1</i> | miR-6773-3p         | 1 |
| <i>circDOCK1</i> | miR-6774-3p         | 1 |
| <i>circDOCK1</i> | miR-6776-3p         | 4 |
| <i>circDOCK1</i> | miR-6777-3p         | 4 |
| <i>circDOCK1</i> | miR-6778-3p         | 1 |
| <i>circDOCK1</i> | miR-6779-3p         | 2 |
| <i>circDOCK1</i> | miR-6780a-3p        | 2 |
| <i>circDOCK1</i> | miR-6782-3p         | 1 |
| <i>circDOCK1</i> | miR-6782-5p         | 2 |
| <i>circDOCK1</i> | miR-6787-3p         | 2 |
| <i>circDOCK1</i> | miR-6788-3p         | 1 |
| <i>circDOCK1</i> | miR-6791-3p/6829-3p | 1 |
| <i>circDOCK1</i> | miR-6799-5p         | 3 |
| <i>circDOCK1</i> | miR-6800-3p         | 1 |
| <i>circDOCK1</i> | miR-6801-3p/6810-3p | 3 |
| <i>circDOCK1</i> | miR-6801-5p         | 2 |
| <i>circDOCK1</i> | miR-6802-3p         | 3 |

|                  |                     |   |
|------------------|---------------------|---|
| <i>circDOCK1</i> | miR-6805-5p         | 1 |
| <i>circDOCK1</i> | miR-6808-3p         | 2 |
| <i>circDOCK1</i> | miR-6814-3p/6872-5p | 1 |
| <i>circDOCK1</i> | miR-6814-5p         | 3 |
| <i>circDOCK1</i> | miR-6817-3p         | 1 |
| <i>circDOCK1</i> | miR-6818-3p         | 1 |
| <i>circDOCK1</i> | miR-6823-5p         | 2 |
| <i>circDOCK1</i> | miR-6825-5p         | 1 |
| <i>circDOCK1</i> | miR-6826-3p         | 2 |
| <i>circDOCK1</i> | miR-6828-3p         | 2 |
| <i>circDOCK1</i> | miR-6830-3p         | 2 |
| <i>circDOCK1</i> | miR-6831-3p         | 1 |
| <i>circDOCK1</i> | miR-6832-3p         | 3 |
| <i>circDOCK1</i> | miR-6832-5p         | 1 |
| <i>circDOCK1</i> | miR-6834-5p         | 2 |
| <i>circDOCK1</i> | miR-6836-3p         | 2 |
| <i>circDOCK1</i> | miR-6842-3p         | 2 |
| <i>circDOCK1</i> | miR-6844            | 3 |
| <i>circDOCK1</i> | miR-6849-3p         | 1 |
| <i>circDOCK1</i> | miR-6853-3p         | 2 |
| <i>circDOCK1</i> | miR-6856-3p         | 1 |
| <i>circDOCK1</i> | miR-6865-3p         | 2 |
| <i>circDOCK1</i> | miR-6867-3p         | 5 |
| <i>circDOCK1</i> | miR-6868-3p         | 2 |
| <i>circDOCK1</i> | miR-6868-5p         | 3 |
| <i>circDOCK1</i> | miR-6869-5p         | 1 |
| <i>circDOCK1</i> | miR-6870-3p         | 2 |
| <i>circDOCK1</i> | miR-6871-3p         | 2 |
| <i>circDOCK1</i> | miR-6871-5p         | 7 |
| <i>circDOCK1</i> | miR-6872-3p         | 2 |
| <i>circDOCK1</i> | miR-6875-3p         | 3 |
| <i>circDOCK1</i> | miR-6879-3p         | 2 |
| <i>circDOCK1</i> | miR-6880-5p         | 2 |
| <i>circDOCK1</i> | miR-6881-3p         | 2 |
| <i>circDOCK1</i> | miR-6882-3p         | 2 |
| <i>circDOCK1</i> | miR-6883-3p         | 2 |
| <i>circDOCK1</i> | miR-6884-3p         | 1 |
| <i>circDOCK1</i> | miR-6885-3p         | 2 |

|                  |             |   |
|------------------|-------------|---|
| <i>circDOCK1</i> | miR-6886-3p | 2 |
| <i>circDOCK1</i> | miR-6888-3p | 1 |
| <i>circDOCK1</i> | miR-6888-5p | 1 |
| <i>circDOCK1</i> | miR-6889-3p | 2 |
| <i>circDOCK1</i> | miR-7-3p    | 5 |
| <i>circDOCK1</i> | miR-7-5p    | 5 |
| <i>circDOCK1</i> | miR-7106-5p | 3 |
| <i>circDOCK1</i> | miR-7109-3p | 1 |
| <i>circDOCK1</i> | miR-7110-3p | 1 |
| <i>circDOCK1</i> | miR-7111-3p | 2 |
| <i>circDOCK1</i> | miR-7113-3p | 3 |
| <i>circDOCK1</i> | miR-7152-5p | 3 |
| <i>circDOCK1</i> | miR-7154-5p | 1 |
| <i>circDOCK1</i> | miR-7156-3p | 2 |
| <i>circDOCK1</i> | miR-7158-3p | 2 |
| <i>circDOCK1</i> | miR-7159-3p | 1 |
| <i>circDOCK1</i> | miR-7159-5p | 2 |
| <i>circDOCK1</i> | miR-7160-5p | 4 |
| <i>circDOCK1</i> | miR-7162-3p | 1 |
| <i>circDOCK1</i> | miR-744-3p  | 1 |
| <i>circDOCK1</i> | miR-7515    | 2 |
| <i>circDOCK1</i> | miR-758-3p  | 1 |
| <i>circDOCK1</i> | miR-759     | 2 |
| <i>circDOCK1</i> | miR-766-3p  | 4 |
| <i>circDOCK1</i> | miR-767-5p  | 1 |
| <i>circDOCK1</i> | miR-770-5p  | 1 |
| <i>circDOCK1</i> | miR-7702    | 1 |
| <i>circDOCK1</i> | miR-7843-3p | 1 |
| <i>circDOCK1</i> | miR-7845-5p | 1 |
| <i>circDOCK1</i> | miR-7848-3p | 1 |
| <i>circDOCK1</i> | miR-7849-3p | 2 |
| <i>circDOCK1</i> | miR-7850-5p | 2 |
| <i>circDOCK1</i> | miR-7851-3p | 2 |
| <i>circDOCK1</i> | miR-7855-5p | 1 |
| <i>circDOCK1</i> | miR-7856-5p | 4 |
| <i>circDOCK1</i> | miR-7973    | 2 |
| <i>circDOCK1</i> | miR-7974    | 1 |
| <i>circDOCK1</i> | miR-7976    | 3 |

|                  |                         |   |
|------------------|-------------------------|---|
| <i>circDOCK1</i> | miR-7978                | 1 |
| <i>circDOCK1</i> | miR-802                 | 1 |
| <i>circDOCK1</i> | miR-8055                | 6 |
| <i>circDOCK1</i> | miR-8060                | 1 |
| <i>circDOCK1</i> | miR-8062                | 2 |
| <i>circDOCK1</i> | miR-8063                | 2 |
| <i>circDOCK1</i> | miR-8064                | 3 |
| <i>circDOCK1</i> | miR-8069                | 1 |
| <i>circDOCK1</i> | miR-8070                | 7 |
| <i>circDOCK1</i> | miR-8071                | 2 |
| <i>circDOCK1</i> | miR-8077                | 4 |
| <i>circDOCK1</i> | miR-8081                | 1 |
| <i>circDOCK1</i> | miR-8083                | 3 |
| <i>circDOCK1</i> | miR-8086                | 1 |
| <i>circDOCK1</i> | miR-8087                | 1 |
| <i>circDOCK1</i> | miR-8088                | 1 |
| <i>circDOCK1</i> | miR-873-3p              | 2 |
| <i>circDOCK1</i> | miR-873-5p.1            | 3 |
| <i>circDOCK1</i> | miR-873-5p.2            | 2 |
| <i>circDOCK1</i> | miR-874-3p              | 1 |
| <i>circDOCK1</i> | miR-875-3p              | 2 |
| <i>circDOCK1</i> | miR-876-3p              | 1 |
| <i>circDOCK1</i> | miR-885-3p              | 4 |
| <i>circDOCK1</i> | miR-887-3p              | 1 |
| <i>circDOCK1</i> | miR-888-3p              | 1 |
| <i>circDOCK1</i> | miR-889-3p              | 2 |
| <i>circDOCK1</i> | miR-890                 | 3 |
| <i>circDOCK1</i> | miR-891b                | 2 |
| <i>circDOCK1</i> | miR-892a                | 2 |
| <i>circDOCK1</i> | miR-921                 | 1 |
| <i>circDOCK1</i> | miR-922                 | 4 |
| <i>circDOCK1</i> | miR-92b-5p              | 1 |
| <i>circDOCK1</i> | miR-93-3p               | 3 |
| <i>circDOCK1</i> | miR-938                 | 2 |
| <i>circDOCK1</i> | miR-939-5p/1343-5p      | 1 |
| <i>circDOCK1</i> | miR-940/6808-5p/6893-5p | 2 |
| <i>circDOCK1</i> | miR-941                 | 1 |
| <i>circDOCK1</i> | miR-943                 | 6 |

|                  |                          |   |
|------------------|--------------------------|---|
| <i>circDOCK1</i> | miR-944                  | 1 |
| <i>circDOCK1</i> | miR-95-5p                | 2 |
| <i>circDOCK1</i> | miR-9500                 | 2 |
| <i>circDOCK1</i> | miR-96-3p                | 2 |
| <i>circDOCK1</i> | miR-96-5p/1271-5p        | 2 |
| <i>circDOCK1</i> | let-7-5p/98-5p           | 1 |
| <i>circDOCK1</i> | miR-1-3p/206             | 6 |
| <i>circDOCK1</i> | miR-101-3p.1             | 1 |
| <i>circDOCK1</i> | miR-105-5p               | 2 |
| <i>circDOCK1</i> | miR-106a-3p              | 1 |
| <i>circDOCK1</i> | miR-1179                 | 1 |
| <i>circDOCK1</i> | miR-1185-5p              | 1 |
| <i>circDOCK1</i> | miR-1199-5p/6751-3p      | 5 |
| <i>circDOCK1</i> | miR-1202/3972            | 1 |
| <i>circDOCK1</i> | miR-1204                 | 3 |
| <i>circDOCK1</i> | miR-1207-5p/4763-3p      | 2 |
| <i>circDOCK1</i> | miR-1225-3p              | 5 |
| <i>circDOCK1</i> | miR-1228-3p              | 2 |
| <i>circDOCK1</i> | miR-1234-3p/7107-5p      | 1 |
| <i>circDOCK1</i> | miR-124-3p.1             | 2 |
| <i>circDOCK1</i> | miR-1246                 | 3 |
| <i>circDOCK1</i> | miR-1247-3p              | 1 |
| <i>circDOCK1</i> | miR-1249-3p              | 1 |
| <i>circDOCK1</i> | miR-1249-5p/6797-5p      | 3 |
| <i>circDOCK1</i> | miR-1254/3116            | 4 |
| <i>circDOCK1</i> | miR-1258                 | 1 |
| <i>circDOCK1</i> | miR-1260a/1260b          | 1 |
| <i>circDOCK1</i> | miR-1261                 | 2 |
| <i>circDOCK1</i> | miR-1262/4701-3p/6736-5p | 1 |
| <i>circDOCK1</i> | miR-1263                 | 1 |
| <i>circDOCK1</i> | miR-1265                 | 2 |
| <i>circDOCK1</i> | miR-1267                 | 1 |
| <i>circDOCK1</i> | miR-127-3p               | 2 |
| <i>circDOCK1</i> | miR-1270                 | 3 |
| <i>circDOCK1</i> | miR-1273f                | 2 |
| <i>circDOCK1</i> | miR-1275/4665-5p         | 2 |
| <i>circDOCK1</i> | miR-1278                 | 1 |
| <i>circDOCK1</i> | miR-1281                 | 1 |



|                  |                                     |   |
|------------------|-------------------------------------|---|
| <i>circDOCK1</i> | miR-1285-5p                         | 1 |
| <i>circDOCK1</i> | miR-1288-5p                         | 2 |
| <i>circDOCK1</i> | miR-1289                            | 1 |
| <i>circDOCK1</i> | miR-1291/6775-3p                    | 1 |
| <i>circDOCK1</i> | miR-1292-5p                         | 1 |
| <i>circDOCK1</i> | miR-1293/4483                       | 1 |
| <i>circDOCK1</i> | miR-1294                            | 1 |
| <i>circDOCK1</i> | miR-1298-3p                         | 1 |
| <i>circDOCK1</i> | miR-1298-5p                         | 2 |
| <i>circDOCK1</i> | miR-130-3p/301-3p/454-3p            | 1 |
| <i>circDOCK1</i> | miR-1301-5p/6502-5p                 | 1 |
| <i>circDOCK1</i> | miR-1303                            | 1 |
| <i>circDOCK1</i> | miR-1305                            | 6 |
| <i>circDOCK1</i> | miR-130b-5p                         | 4 |
| <i>circDOCK1</i> | miR-132-3p/212-3p                   | 5 |
| <i>circDOCK1</i> | miR-132-5p                          | 1 |
| <i>circDOCK1</i> | miR-133a-3p.1                       | 4 |
| <i>circDOCK1</i> | miR-133a-5p                         | 1 |
| <i>circDOCK1</i> | miR-135-5p                          | 1 |
| <i>circDOCK1</i> | miR-136-3p                          | 1 |
| <i>circDOCK1</i> | miR-138-1-3p                        | 1 |
| <i>circDOCK1</i> | miR-138-5p                          | 1 |
| <i>circDOCK1</i> | miR-139-3p                          | 4 |
| <i>circDOCK1</i> | miR-141-5p                          | 2 |
| <i>circDOCK1</i> | miR-143-3p                          | 2 |
| <i>circDOCK1</i> | miR-144-3p                          | 1 |
| <i>circDOCK1</i> | miR-144-5p                          | 3 |
| <i>circDOCK1</i> | miR-1468-3p                         | 1 |
| <i>circDOCK1</i> | miR-150-3p                          | 1 |
| <i>circDOCK1</i> | miR-150-5p                          | 3 |
| <i>circDOCK1</i> | miR-153-5p                          | 2 |
| <i>circDOCK1</i> | miR-1537-3p                         | 5 |
| <i>circDOCK1</i> | miR-1539                            | 2 |
| <i>circDOCK1</i> | miR-16-2-3p/195-3p                  | 4 |
| <i>circDOCK1</i> | miR-17-5p/20-5p/93-5p/106-5p/519-3p | 2 |
| <i>circDOCK1</i> | miR-18-5p                           | 5 |
| <i>circDOCK1</i> | miR-181a-3p                         | 3 |
| <i>circDOCK1</i> | miR-181c-3p                         | 1 |

|                  |                     |   |
|------------------|---------------------|---|
| <i>circDOCK1</i> | miR-181d-3p         | 1 |
| <i>circDOCK1</i> | miR-1825            | 5 |
| <i>circDOCK1</i> | miR-183-5p.2        | 1 |
| <i>circDOCK1</i> | miR-185-5p          | 3 |
| <i>circDOCK1</i> | miR-187-5p          | 1 |
| <i>circDOCK1</i> | miR-188-3p          | 1 |
| <i>circDOCK1</i> | miR-19-5p           | 1 |
| <i>circDOCK1</i> | miR-190-5p          | 2 |
| <i>circDOCK1</i> | miR-1909-3p/6722-3p | 1 |
| <i>circDOCK1</i> | miR-1910-5p         | 3 |
| <i>circDOCK1</i> | miR-1911-3p         | 3 |
| <i>circDOCK1</i> | miR-1915-3p/6764-5p | 2 |
| <i>circDOCK1</i> | miR-1915-5p         | 2 |
| <i>circDOCK1</i> | miR-194-5p          | 4 |
| <i>circDOCK1</i> | miR-197-3p          | 4 |
| <i>circDOCK1</i> | miR-1972            | 2 |
| <i>circDOCK1</i> | miR-1976            | 2 |
| <i>circDOCK1</i> | miR-199-5p          | 5 |
| <i>circDOCK1</i> | miR-200-3p/429      | 2 |
| <i>circDOCK1</i> | miR-204-3p/4646-5p  | 3 |
| <i>circDOCK1</i> | miR-2052            | 1 |
| <i>circDOCK1</i> | miR-208-5p          | 4 |
| <i>circDOCK1</i> | miR-21-3p/3591-3p   | 1 |
| <i>circDOCK1</i> | miR-210-5p          | 3 |
| <i>circDOCK1</i> | miR-211-3p          | 2 |
| <i>circDOCK1</i> | miR-2114-3p         | 3 |
| <i>circDOCK1</i> | miR-2115-3p         | 3 |
| <i>circDOCK1</i> | miR-2116-3p         | 3 |
| <i>circDOCK1</i> | miR-214-5p          | 2 |
| <i>circDOCK1</i> | miR-216a-5p         | 1 |
| <i>circDOCK1</i> | miR-216b-5p         | 1 |
| <i>circDOCK1</i> | miR-219a-2-3p       | 4 |
| <i>circDOCK1</i> | miR-219b-3p         | 4 |
| <i>circDOCK1</i> | miR-23-3p           | 1 |
| <i>circDOCK1</i> | miR-23-5p           | 1 |
| <i>circDOCK1</i> | miR-2355-5p         | 4 |
| <i>circDOCK1</i> | miR-24-3p           | 1 |
| <i>circDOCK1</i> | miR-25-5p           | 5 |

|                  |                                              |   |
|------------------|----------------------------------------------|---|
| <i>circDOCK1</i> | miR-26-5p                                    | 2 |
| <i>circDOCK1</i> | miR-26b-3p                                   | 1 |
| <i>circDOCK1</i> | miR-28-3p                                    | 1 |
| <i>circDOCK1</i> | miR-28-5p/708-5p                             | 2 |
| <i>circDOCK1</i> | miR-29b-2-5p                                 | 1 |
| <i>circDOCK1</i> | miR-302-3p/372-3p/373-3p/520-3p              | 2 |
| <i>circDOCK1</i> | miR-302c-3p.2/520-3p                         | 2 |
| <i>circDOCK1</i> | miR-3064-3p                                  | 1 |
| <i>circDOCK1</i> | miR-3065-3p                                  | 2 |
| <i>circDOCK1</i> | miR-3074-3p                                  | 6 |
| <i>circDOCK1</i> | miR-30b-3p/1273h-5p/3689-3p/6779-5p/6780a-5p | 4 |
| <i>circDOCK1</i> | miR-30c-3p/6788-5p                           | 4 |
| <i>circDOCK1</i> | miR-31-5p                                    | 1 |
| <i>circDOCK1</i> | miR-3120-3p                                  | 2 |
| <i>circDOCK1</i> | miR-3122/3913-5p                             | 1 |
| <i>circDOCK1</i> | miR-3126-3p                                  | 1 |
| <i>circDOCK1</i> | miR-3127-3p/6756-3p                          | 3 |
| <i>circDOCK1</i> | miR-3129-3p/5583-5p                          | 1 |
| <i>circDOCK1</i> | miR-3134                                     | 2 |
| <i>circDOCK1</i> | miR-3146                                     | 1 |
| <i>circDOCK1</i> | miR-3147                                     | 1 |
| <i>circDOCK1</i> | miR-3148                                     | 2 |
| <i>circDOCK1</i> | miR-3150b-3p                                 | 1 |
| <i>circDOCK1</i> | miR-3153/6733-5p/6739-5p                     | 1 |
| <i>circDOCK1</i> | miR-3156-3p                                  | 1 |
| <i>circDOCK1</i> | miR-3156-5p                                  | 3 |
| <i>circDOCK1</i> | miR-3157-5p                                  | 1 |
| <i>circDOCK1</i> | miR-3161                                     | 1 |
| <i>circDOCK1</i> | miR-3166                                     | 1 |
| <i>circDOCK1</i> | miR-3173-3p/6891-5p                          | 2 |
| <i>circDOCK1</i> | miR-3174                                     | 3 |
| <i>circDOCK1</i> | miR-3176/3922-3p                             | 5 |
| <i>circDOCK1</i> | miR-3185                                     | 6 |
| <i>circDOCK1</i> | miR-3187-3p                                  | 7 |
| <i>circDOCK1</i> | miR-3189-5p                                  | 1 |
| <i>circDOCK1</i> | miR-3190-3p                                  | 1 |
| <i>circDOCK1</i> | miR-3190-5p                                  | 5 |
| <i>circDOCK1</i> | miR-3192-5p                                  | 3 |

|                  |                     |   |
|------------------|---------------------|---|
| <i>circDOCK1</i> | miR-3193            | 4 |
| <i>circDOCK1</i> | miR-3199/8052       | 1 |
| <i>circDOCK1</i> | miR-3200-3p         | 1 |
| <i>circDOCK1</i> | miR-324-5p          | 1 |
| <i>circDOCK1</i> | miR-328-3p          | 1 |
| <i>circDOCK1</i> | miR-329-3p/362-3p   | 2 |
| <i>circDOCK1</i> | miR-330-3p.2        | 1 |
| <i>circDOCK1</i> | miR-335-5p          | 1 |
| <i>circDOCK1</i> | miR-337-5p          | 1 |
| <i>circDOCK1</i> | miR-338-5p          | 1 |
| <i>circDOCK1</i> | miR-339-3p          | 1 |
| <i>circDOCK1</i> | miR-33a-3p          | 3 |
| <i>circDOCK1</i> | miR-340-3p/6827-3p  | 1 |
| <i>circDOCK1</i> | miR-34a-3p          | 4 |
| <i>circDOCK1</i> | miR-3605-3p         | 2 |
| <i>circDOCK1</i> | miR-3605-5p         | 1 |
| <i>circDOCK1</i> | miR-361-3p          | 3 |
| <i>circDOCK1</i> | miR-361-5p          | 5 |
| <i>circDOCK1</i> | miR-3614-3p         | 1 |
| <i>circDOCK1</i> | miR-3616-3p         | 2 |
| <i>circDOCK1</i> | miR-3617-3p         | 4 |
| <i>circDOCK1</i> | miR-362-5p/500b-5p  | 1 |
| <i>circDOCK1</i> | miR-3622a-5p        | 1 |
| <i>circDOCK1</i> | miR-3622b-5p        | 2 |
| <i>circDOCK1</i> | miR-363-5p/6745     | 1 |
| <i>circDOCK1</i> | miR-3652/4430       | 2 |
| <i>circDOCK1</i> | miR-3653-3p         | 1 |
| <i>circDOCK1</i> | miR-3653-5p         | 2 |
| <i>circDOCK1</i> | miR-365a-5p/365b-5p | 1 |
| <i>circDOCK1</i> | miR-3663-5p         | 2 |
| <i>circDOCK1</i> | miR-367-5p          | 1 |
| <i>circDOCK1</i> | miR-3671            | 1 |
| <i>circDOCK1</i> | miR-3677-5p         | 2 |
| <i>circDOCK1</i> | miR-3679-3p         | 1 |
| <i>circDOCK1</i> | miR-3687/4442       | 2 |
| <i>circDOCK1</i> | miR-3688-5p         | 1 |
| <i>circDOCK1</i> | miR-369-3p          | 1 |
| <i>circDOCK1</i> | miR-370-3p          | 2 |

|                  |                           |   |
|------------------|---------------------------|---|
| <i>circDOCK1</i> | miR-371-5p                | 2 |
| <i>circDOCK1</i> | miR-3714                  | 2 |
| <i>circDOCK1</i> | miR-371b-5p/373-5p/616-5p | 2 |
| <i>circDOCK1</i> | miR-372-5p                | 2 |
| <i>circDOCK1</i> | miR-374-5p/655-3p         | 1 |
| <i>circDOCK1</i> | miR-374a-3p               | 7 |
| <i>circDOCK1</i> | miR-374c-3p               | 1 |
| <i>circDOCK1</i> | miR-375                   | 4 |
| <i>circDOCK1</i> | miR-376b-5p/376c-5p       | 2 |
| <i>circDOCK1</i> | miR-376c-3p               | 1 |
| <i>circDOCK1</i> | miR-380-5p/563            | 3 |
| <i>circDOCK1</i> | miR-382-3p                | 1 |
| <i>circDOCK1</i> | miR-383-3p                | 2 |
| <i>circDOCK1</i> | miR-3909                  | 8 |
| <i>circDOCK1</i> | miR-3910                  | 2 |
| <i>circDOCK1</i> | miR-3911                  | 1 |
| <i>circDOCK1</i> | miR-3914                  | 3 |
| <i>circDOCK1</i> | miR-3929/4419b/4478       | 2 |
| <i>circDOCK1</i> | miR-3934-3p               | 1 |
| <i>circDOCK1</i> | miR-3940-5p/4507          | 1 |
| <i>circDOCK1</i> | miR-3941                  | 1 |
| <i>circDOCK1</i> | miR-3943                  | 2 |
| <i>circDOCK1</i> | miR-409-5p                | 1 |
| <i>circDOCK1</i> | miR-412-3p/6754-3p        | 2 |
| <i>circDOCK1</i> | miR-423-3p                | 1 |
| <i>circDOCK1</i> | miR-424-3p                | 1 |
| <i>circDOCK1</i> | miR-4251                  | 4 |
| <i>circDOCK1</i> | miR-4257                  | 3 |
| <i>circDOCK1</i> | miR-4260                  | 2 |
| <i>circDOCK1</i> | miR-4267                  | 1 |
| <i>circDOCK1</i> | miR-4269/6715b-5p         | 2 |
| <i>circDOCK1</i> | miR-4271/4725-3p/6780b-5p | 2 |
| <i>circDOCK1</i> | miR-4281                  | 2 |
| <i>circDOCK1</i> | miR-4283                  | 1 |
| <i>circDOCK1</i> | miR-4284                  | 1 |
| <i>circDOCK1</i> | miR-4294                  | 1 |
| <i>circDOCK1</i> | miR-4297/5581-5p          | 3 |
| <i>circDOCK1</i> | miR-4301                  | 3 |

|                  |                                              |   |
|------------------|----------------------------------------------|---|
| <i>circDOCK1</i> | miR-4303                                     | 2 |
| <i>circDOCK1</i> | miR-4305                                     | 1 |
| <i>circDOCK1</i> | miR-4313                                     | 1 |
| <i>circDOCK1</i> | miR-4315                                     | 1 |
| <i>circDOCK1</i> | miR-4316                                     | 1 |
| <i>circDOCK1</i> | miR-4323                                     | 2 |
| <i>circDOCK1</i> | miR-4329                                     | 4 |
| <i>circDOCK1</i> | miR-433-5p                                   | 1 |
| <i>circDOCK1</i> | miR-4330                                     | 1 |
| <i>circDOCK1</i> | miR-4422                                     | 1 |
| <i>circDOCK1</i> | miR-4425                                     | 1 |
| <i>circDOCK1</i> | miR-4428                                     | 2 |
| <i>circDOCK1</i> | miR-4433b-3p                                 | 1 |
| <i>circDOCK1</i> | miR-4435                                     | 7 |
| <i>circDOCK1</i> | miR-4436b-3p/4632-5p/6735-5p/6879-5p/7843-5p | 2 |
| <i>circDOCK1</i> | miR-4438                                     | 2 |
| <i>circDOCK1</i> | miR-4443                                     | 1 |
| <i>circDOCK1</i> | miR-4450                                     | 1 |
| <i>circDOCK1</i> | miR-4453/4538                                | 1 |
| <i>circDOCK1</i> | miR-4454                                     | 1 |
| <i>circDOCK1</i> | miR-4471/8059                                | 1 |
| <i>circDOCK1</i> | miR-4473                                     | 1 |
| <i>circDOCK1</i> | miR-4474-3p                                  | 5 |
| <i>circDOCK1</i> | miR-4475                                     | 2 |
| <i>circDOCK1</i> | miR-4481/4745-5p                             | 3 |
| <i>circDOCK1</i> | miR-4485-5p                                  | 1 |
| <i>circDOCK1</i> | miR-4489                                     | 1 |
| <i>circDOCK1</i> | miR-4494                                     | 1 |
| <i>circDOCK1</i> | miR-449b-3p                                  | 1 |
| <i>circDOCK1</i> | miR-4501                                     | 2 |
| <i>circDOCK1</i> | miR-4503                                     | 4 |
| <i>circDOCK1</i> | miR-4505/5787                                | 2 |
| <i>circDOCK1</i> | miR-4508                                     | 1 |
| <i>circDOCK1</i> | miR-450a-1-3p                                | 1 |
| <i>circDOCK1</i> | miR-450a-2-3p                                | 2 |
| <i>circDOCK1</i> | miR-4511                                     | 3 |
| <i>circDOCK1</i> | miR-4514/4692                                | 2 |
| <i>circDOCK1</i> | miR-4520-5p                                  | 2 |

|                  |                     |   |
|------------------|---------------------|---|
| <i>circDOCK1</i> | miR-4522            | 3 |
| <i>circDOCK1</i> | miR-4528            | 1 |
| <i>circDOCK1</i> | miR-4531            | 3 |
| <i>circDOCK1</i> | miR-4534/8082       | 2 |
| <i>circDOCK1</i> | miR-455-3p.1        | 3 |
| <i>circDOCK1</i> | miR-4633-3p/6500-5p | 5 |
| <i>circDOCK1</i> | miR-4635            | 4 |
| <i>circDOCK1</i> | miR-4639-5p         | 1 |
| <i>circDOCK1</i> | miR-4640-3p         | 3 |
| <i>circDOCK1</i> | miR-4643            | 1 |
| <i>circDOCK1</i> | miR-4645-3p         | 1 |
| <i>circDOCK1</i> | miR-4645-5p/4673    | 3 |
| <i>circDOCK1</i> | miR-4650-5p         | 2 |
| <i>circDOCK1</i> | miR-4656            | 2 |
| <i>circDOCK1</i> | miR-4661-3p         | 1 |
| <i>circDOCK1</i> | miR-4665-3p         | 1 |
| <i>circDOCK1</i> | miR-4666a-5p        | 1 |
| <i>circDOCK1</i> | miR-4666b           | 1 |
| <i>circDOCK1</i> | miR-4668-5p         | 1 |
| <i>circDOCK1</i> | miR-4671-3p         | 1 |
| <i>circDOCK1</i> | miR-4671-5p         | 5 |
| <i>circDOCK1</i> | miR-4672            | 1 |
| <i>circDOCK1</i> | miR-4675/4741       | 2 |
| <i>circDOCK1</i> | miR-4678            | 1 |
| <i>circDOCK1</i> | miR-4681            | 3 |
| <i>circDOCK1</i> | miR-4683            | 4 |
| <i>circDOCK1</i> | miR-4685-5p/6837-5p | 1 |
| <i>circDOCK1</i> | miR-4693-3p         | 4 |
| <i>circDOCK1</i> | miR-4695-5p         | 1 |
| <i>circDOCK1</i> | miR-4700-3p         | 2 |
| <i>circDOCK1</i> | miR-4707-5p         | 2 |
| <i>circDOCK1</i> | miR-4708-3p         | 2 |
| <i>circDOCK1</i> | miR-4708-5p         | 2 |
| <i>circDOCK1</i> | miR-4710            | 1 |
| <i>circDOCK1</i> | miR-4715-3p         | 3 |
| <i>circDOCK1</i> | miR-4716-5p         | 2 |
| <i>circDOCK1</i> | miR-4717-3p         | 2 |
| <i>circDOCK1</i> | miR-4721            | 2 |

|                  |                     |   |
|------------------|---------------------|---|
| <i>circDOCK1</i> | miR-4724-3p         | 1 |
| <i>circDOCK1</i> | miR-4726-3p         | 2 |
| <i>circDOCK1</i> | miR-4727-5p         | 2 |
| <i>circDOCK1</i> | miR-4728-3p         | 3 |
| <i>circDOCK1</i> | miR-4729            | 1 |
| <i>circDOCK1</i> | miR-4730            | 6 |
| <i>circDOCK1</i> | miR-4734            | 5 |
| <i>circDOCK1</i> | miR-4735-5p         | 1 |
| <i>circDOCK1</i> | miR-4736            | 2 |
| <i>circDOCK1</i> | miR-4738-3p         | 3 |
| <i>circDOCK1</i> | miR-4739            | 2 |
| <i>circDOCK1</i> | miR-4742-5p         | 2 |
| <i>circDOCK1</i> | miR-4743-5p         | 1 |
| <i>circDOCK1</i> | miR-4746-3p         | 1 |
| <i>circDOCK1</i> | miR-4746-5p         | 2 |
| <i>circDOCK1</i> | miR-4747-3p         | 1 |
| <i>circDOCK1</i> | miR-4747-5p/5196-5p | 3 |
| <i>circDOCK1</i> | miR-4749-3p         | 3 |
| <i>circDOCK1</i> | miR-4754            | 2 |
| <i>circDOCK1</i> | miR-4758-3p         | 1 |
| <i>circDOCK1</i> | miR-4760-3p         | 5 |
| <i>circDOCK1</i> | miR-4761-3p         | 2 |
| <i>circDOCK1</i> | miR-4761-5p         | 2 |
| <i>circDOCK1</i> | miR-4764-5p         | 2 |
| <i>circDOCK1</i> | miR-4766-5p         | 2 |
| <i>circDOCK1</i> | miR-4771            | 1 |
| <i>circDOCK1</i> | miR-4773            | 2 |
| <i>circDOCK1</i> | miR-4775            | 2 |
| <i>circDOCK1</i> | miR-4776-3p         | 1 |
| <i>circDOCK1</i> | miR-4779            | 1 |
| <i>circDOCK1</i> | miR-4780            | 2 |
| <i>circDOCK1</i> | miR-4786-3p         | 1 |
| <i>circDOCK1</i> | miR-4786-5p         | 1 |
| <i>circDOCK1</i> | miR-4789-3p         | 1 |
| <i>circDOCK1</i> | miR-4792            | 1 |
| <i>circDOCK1</i> | miR-4795-3p         | 1 |
| <i>circDOCK1</i> | miR-4795-5p         | 1 |
| <i>circDOCK1</i> | miR-4796-3p         | 2 |



|                  |                     |   |
|------------------|---------------------|---|
| <i>circDOCK1</i> | miR-4797-5p         | 1 |
| <i>circDOCK1</i> | miR-483-3p.1        | 2 |
| <i>circDOCK1</i> | miR-484/3155        | 5 |
| <i>circDOCK1</i> | miR-487-3p          | 2 |
| <i>circDOCK1</i> | miR-488-3p          | 1 |
| <i>circDOCK1</i> | miR-489-3p          | 1 |
| <i>circDOCK1</i> | miR-498             | 9 |
| <i>circDOCK1</i> | miR-4999-3p         | 1 |
| <i>circDOCK1</i> | miR-499a-3p/499b-3p | 1 |
| <i>circDOCK1</i> | miR-499b-5p         | 1 |
| <i>circDOCK1</i> | miR-5001-3p         | 2 |
| <i>circDOCK1</i> | miR-5002-3p         | 6 |
| <i>circDOCK1</i> | miR-5006-5p         | 1 |
| <i>circDOCK1</i> | miR-5007-5p         | 1 |
| <i>circDOCK1</i> | miR-5008-5p         | 1 |
| <i>circDOCK1</i> | miR-501-5p          | 1 |
| <i>circDOCK1</i> | miR-5011-3p         | 1 |
| <i>circDOCK1</i> | miR-502-5p          | 4 |
| <i>circDOCK1</i> | miR-504-3p          | 6 |
| <i>circDOCK1</i> | miR-505-5p          | 2 |
| <i>circDOCK1</i> | miR-5090/6775-5p    | 1 |
| <i>circDOCK1</i> | miR-5094            | 1 |
| <i>circDOCK1</i> | miR-5096            | 5 |
| <i>circDOCK1</i> | miR-510-5p          | 1 |
| <i>circDOCK1</i> | miR-5100            | 1 |
| <i>circDOCK1</i> | miR-512-3p          | 2 |
| <i>circDOCK1</i> | miR-514a-3p         | 1 |
| <i>circDOCK1</i> | miR-515-5p/519e-5p  | 4 |
| <i>circDOCK1</i> | miR-518-3p          | 2 |
| <i>circDOCK1</i> | miR-5189-3p         | 1 |
| <i>circDOCK1</i> | miR-519-3p          | 2 |
| <i>circDOCK1</i> | miR-5190            | 4 |
| <i>circDOCK1</i> | miR-5192            | 3 |
| <i>circDOCK1</i> | miR-5193            | 1 |
| <i>circDOCK1</i> | miR-5195-5p         | 1 |
| <i>circDOCK1</i> | miR-520g-5p         | 1 |
| <i>circDOCK1</i> | miR-523-3p          | 1 |
| <i>circDOCK1</i> | miR-524-3p/525-3p   | 1 |

|                  |                                      |   |
|------------------|--------------------------------------|---|
| <i>circDOCK1</i> | miR-532-3p                           | 3 |
| <i>circDOCK1</i> | miR-539-3p                           | 1 |
| <i>circDOCK1</i> | miR-542-5p                           | 2 |
| <i>circDOCK1</i> | miR-548ad-3p                         | 1 |
| <i>circDOCK1</i> | miR-548ah-5p/3609                    | 2 |
| <i>circDOCK1</i> | miR-548aj-5p/548f-5p/548g-5p/548x-5p | 1 |
| <i>circDOCK1</i> | miR-548ao-5p/548ax                   | 2 |
| <i>circDOCK1</i> | miR-548az-5p/548t-5p                 | 3 |
| <i>circDOCK1</i> | miR-548b-3p                          | 3 |
| <i>circDOCK1</i> | miR-548e-5p                          | 1 |
| <i>circDOCK1</i> | miR-548n                             | 3 |
| <i>circDOCK1</i> | miR-548s                             | 7 |
| <i>circDOCK1</i> | miR-552-3p                           | 1 |
| <i>circDOCK1</i> | miR-553                              | 1 |
| <i>circDOCK1</i> | miR-5572                             | 2 |
| <i>circDOCK1</i> | miR-5580-5p                          | 4 |
| <i>circDOCK1</i> | miR-5582-5p                          | 1 |
| <i>circDOCK1</i> | miR-5585-5p                          | 2 |
| <i>circDOCK1</i> | miR-5586-5p                          | 4 |
| <i>circDOCK1</i> | miR-5587-3p                          | 2 |
| <i>circDOCK1</i> | miR-5591-3p                          | 2 |
| <i>circDOCK1</i> | miR-561-5p                           | 3 |
| <i>circDOCK1</i> | miR-5681a                            | 1 |
| <i>circDOCK1</i> | miR-5683                             | 1 |
| <i>circDOCK1</i> | miR-5691                             | 4 |
| <i>circDOCK1</i> | miR-5692bc                           | 1 |
| <i>circDOCK1</i> | miR-5696                             | 2 |
| <i>circDOCK1</i> | miR-5697                             | 1 |
| <i>circDOCK1</i> | miR-5699-5p                          | 1 |
| <i>circDOCK1</i> | miR-5702                             | 1 |
| <i>circDOCK1</i> | miR-5705                             | 1 |
| <i>circDOCK1</i> | miR-575/4676-5p                      | 1 |
| <i>circDOCK1</i> | miR-579-3p                           | 2 |
| <i>circDOCK1</i> | miR-581                              | 3 |
| <i>circDOCK1</i> | miR-582-3p                           | 5 |
| <i>circDOCK1</i> | miR-588                              | 7 |
| <i>circDOCK1</i> | miR-589-3p                           | 1 |
| <i>circDOCK1</i> | miR-591                              | 1 |

|                  |                    |   |
|------------------|--------------------|---|
| <i>circDOCK1</i> | miR-592            | 1 |
| <i>circDOCK1</i> | miR-593-5p         | 2 |
| <i>circDOCK1</i> | miR-598-3p         | 1 |
| <i>circDOCK1</i> | miR-598-5p         | 1 |
| <i>circDOCK1</i> | miR-599            | 1 |
| <i>circDOCK1</i> | miR-600            | 2 |
| <i>circDOCK1</i> | miR-603            | 2 |
| <i>circDOCK1</i> | miR-6068           | 2 |
| <i>circDOCK1</i> | miR-6069           | 1 |
| <i>circDOCK1</i> | miR-607            | 3 |
| <i>circDOCK1</i> | miR-6072/6891-3p   | 1 |
| <i>circDOCK1</i> | miR-6080           | 1 |
| <i>circDOCK1</i> | miR-6081           | 3 |
| <i>circDOCK1</i> | miR-6083           | 1 |
| <i>circDOCK1</i> | miR-6084           | 1 |
| <i>circDOCK1</i> | miR-6089           | 1 |
| <i>circDOCK1</i> | miR-610            | 6 |
| <i>circDOCK1</i> | miR-6124           | 2 |
| <i>circDOCK1</i> | miR-6125           | 5 |
| <i>circDOCK1</i> | miR-6126           | 2 |
| <i>circDOCK1</i> | miR-6128           | 2 |
| <i>circDOCK1</i> | miR-6131           | 1 |
| <i>circDOCK1</i> | miR-6132/6836-5p   | 1 |
| <i>circDOCK1</i> | miR-6134           | 1 |
| <i>circDOCK1</i> | miR-616-3p         | 3 |
| <i>circDOCK1</i> | miR-619-5p/6506-5p | 3 |
| <i>circDOCK1</i> | miR-622            | 5 |
| <i>circDOCK1</i> | miR-627-5p         | 1 |
| <i>circDOCK1</i> | miR-631/3661       | 7 |
| <i>circDOCK1</i> | miR-635/6774-5p    | 3 |
| <i>circDOCK1</i> | miR-636            | 2 |
| <i>circDOCK1</i> | miR-639            | 1 |
| <i>circDOCK1</i> | miR-644a           | 1 |
| <i>circDOCK1</i> | miR-648            | 1 |
| <i>circDOCK1</i> | miR-6506-3p        | 1 |
| <i>circDOCK1</i> | miR-6511-3p        | 3 |
| <i>circDOCK1</i> | miR-6513-3p        | 1 |
| <i>circDOCK1</i> | miR-6513-5p        | 1 |

|                  |                     |   |
|------------------|---------------------|---|
| <i>circDOCK1</i> | miR-6514-3p         | 2 |
| <i>circDOCK1</i> | miR-6515-5p         | 1 |
| <i>circDOCK1</i> | miR-652-3p          | 1 |
| <i>circDOCK1</i> | miR-660-3p          | 1 |
| <i>circDOCK1</i> | miR-661             | 4 |
| <i>circDOCK1</i> | miR-663b            | 4 |
| <i>circDOCK1</i> | miR-6715b-3p        | 1 |
| <i>circDOCK1</i> | miR-6721-5p         | 1 |
| <i>circDOCK1</i> | miR-6727-5p         | 2 |
| <i>circDOCK1</i> | miR-6730-5p         | 1 |
| <i>circDOCK1</i> | miR-6731-5p/8085    | 6 |
| <i>circDOCK1</i> | miR-6732-3p         | 3 |
| <i>circDOCK1</i> | miR-6735-3p         | 5 |
| <i>circDOCK1</i> | miR-6740-5p         | 2 |
| <i>circDOCK1</i> | miR-6741-5p         | 1 |
| <i>circDOCK1</i> | miR-6742-3p         | 2 |
| <i>circDOCK1</i> | miR-6746-5p         | 2 |
| <i>circDOCK1</i> | miR-6751-5p/6803-5p | 2 |
| <i>circDOCK1</i> | miR-6756-5p/6766-5p | 1 |
| <i>circDOCK1</i> | miR-676-3p          | 1 |
| <i>circDOCK1</i> | miR-6760-5p         | 2 |
| <i>circDOCK1</i> | miR-6761-5p         | 4 |
| <i>circDOCK1</i> | miR-6768-5p         | 1 |
| <i>circDOCK1</i> | miR-6769a-3p        | 2 |
| <i>circDOCK1</i> | miR-6770-3p         | 6 |
| <i>circDOCK1</i> | miR-6771-3p         | 3 |
| <i>circDOCK1</i> | miR-6776-5p         | 1 |
| <i>circDOCK1</i> | miR-6777-5p/6889-5p | 1 |
| <i>circDOCK1</i> | miR-6780b-3p        | 2 |
| <i>circDOCK1</i> | miR-6783-5p         | 1 |
| <i>circDOCK1</i> | miR-6784-3p/6862-3p | 3 |
| <i>circDOCK1</i> | miR-6786-5p         | 1 |
| <i>circDOCK1</i> | miR-6790-3p         | 2 |
| <i>circDOCK1</i> | miR-6792-5p         | 4 |
| <i>circDOCK1</i> | miR-6793-3p         | 2 |
| <i>circDOCK1</i> | miR-6796-3p         | 1 |
| <i>circDOCK1</i> | miR-6798-3p         | 1 |
| <i>circDOCK1</i> | miR-6798-5p         | 1 |

|                  |                     |   |
|------------------|---------------------|---|
| <i>circDOCK1</i> | miR-6807-5p         | 5 |
| <i>circDOCK1</i> | miR-6809-5p         | 1 |
| <i>circDOCK1</i> | miR-6811-3p         | 2 |
| <i>circDOCK1</i> | miR-6812-3p         | 1 |
| <i>circDOCK1</i> | miR-6813-3p         | 1 |
| <i>circDOCK1</i> | miR-6815-3p         | 4 |
| <i>circDOCK1</i> | miR-6815-5p/6865-5p | 1 |
| <i>circDOCK1</i> | miR-6821-3p         | 2 |
| <i>circDOCK1</i> | miR-6821-5p         | 1 |
| <i>circDOCK1</i> | miR-6822-3p         | 1 |
| <i>circDOCK1</i> | miR-6826-5p         | 3 |
| <i>circDOCK1</i> | miR-6827-5p         | 6 |
| <i>circDOCK1</i> | miR-6829-5p         | 2 |
| <i>circDOCK1</i> | miR-6830-5p         | 2 |
| <i>circDOCK1</i> | miR-6837-3p         | 2 |
| <i>circDOCK1</i> | miR-6838-3p         | 7 |
| <i>circDOCK1</i> | miR-6839-3p         | 1 |
| <i>circDOCK1</i> | miR-6840-3p         | 2 |
| <i>circDOCK1</i> | miR-6840-5p         | 2 |
| <i>circDOCK1</i> | miR-6841-3p         | 2 |
| <i>circDOCK1</i> | miR-6845-3p         | 1 |
| <i>circDOCK1</i> | miR-6846-3p         | 2 |
| <i>circDOCK1</i> | miR-6847-3p         | 1 |
| <i>circDOCK1</i> | miR-6847-5p         | 3 |
| <i>circDOCK1</i> | miR-6850-5p         | 2 |
| <i>circDOCK1</i> | miR-6851-3p         | 1 |
| <i>circDOCK1</i> | miR-6852-5p         | 2 |
| <i>circDOCK1</i> | miR-6853-5p         | 3 |
| <i>circDOCK1</i> | miR-6854-5p         | 2 |
| <i>circDOCK1</i> | miR-6858-3p         | 1 |
| <i>circDOCK1</i> | miR-6859-3p         | 2 |
| <i>circDOCK1</i> | miR-6861-5p         | 1 |
| <i>circDOCK1</i> | miR-6864-5p         | 2 |
| <i>circDOCK1</i> | miR-6874-5p         | 8 |
| <i>circDOCK1</i> | miR-6878-3p         | 4 |
| <i>circDOCK1</i> | miR-6878-5p         | 6 |
| <i>circDOCK1</i> | miR-6882-5p         | 1 |
| <i>circDOCK1</i> | miR-6890-3p         | 3 |

|                  |                           |   |
|------------------|---------------------------|---|
| <i>circDOCK1</i> | miR-6894-3p               | 2 |
| <i>circDOCK1</i> | miR-6894-5p               | 1 |
| <i>circDOCK1</i> | miR-7106-3p               | 2 |
| <i>circDOCK1</i> | miR-7108-5p               | 5 |
| <i>circDOCK1</i> | miR-7109-5p               | 2 |
| <i>circDOCK1</i> | miR-711                   | 2 |
| <i>circDOCK1</i> | miR-7113-5p               | 1 |
| <i>circDOCK1</i> | miR-7114-5p               | 7 |
| <i>circDOCK1</i> | miR-7150                  | 6 |
| <i>circDOCK1</i> | miR-7152-3p               | 2 |
| <i>circDOCK1</i> | miR-7153-3p               | 1 |
| <i>circDOCK1</i> | miR-7154-3p               | 1 |
| <i>circDOCK1</i> | miR-7161-3p               | 1 |
| <i>circDOCK1</i> | miR-758-5p                | 3 |
| <i>circDOCK1</i> | miR-760                   | 1 |
| <i>circDOCK1</i> | miR-762/4492/4498/5001-5p | 2 |
| <i>circDOCK1</i> | miR-764                   | 1 |
| <i>circDOCK1</i> | miR-765                   | 1 |
| <i>circDOCK1</i> | miR-766-5p                | 1 |
| <i>circDOCK1</i> | miR-769-5p                | 1 |
| <i>circDOCK1</i> | miR-7705                  | 1 |
| <i>circDOCK1</i> | miR-7847-3p               | 5 |
| <i>circDOCK1</i> | miR-7854-3p               | 1 |
| <i>circDOCK1</i> | miR-7977                  | 4 |
| <i>circDOCK1</i> | miR-8057                  | 2 |
| <i>circDOCK1</i> | miR-8066                  | 1 |
| <i>circDOCK1</i> | miR-8084                  | 2 |
| <i>circDOCK1</i> | miR-8485                  | 2 |
| <i>circDOCK1</i> | miR-874-5p                | 1 |
| <i>circDOCK1</i> | miR-877-3p                | 8 |
| <i>circDOCK1</i> | miR-887-5p                | 1 |
| <i>circDOCK1</i> | miR-888-5p                | 1 |
| <i>circDOCK1</i> | miR-889-5p                | 1 |
| <i>circDOCK1</i> | miR-891a-3p               | 1 |
| <i>circDOCK1</i> | miR-9-5p                  | 2 |
| <i>circDOCK1</i> | miR-935                   | 3 |
| <i>circDOCK1</i> | miR-937-5p                | 1 |
| <i>circDOCK1</i> | miR-939-3p                | 2 |

|                  |                                       |   |
|------------------|---------------------------------------|---|
| <i>circDOCK1</i> | miR-942-3p                            | 1 |
| <i>circDOCK1</i> | miR-99-3p                             | 1 |
| <i>circDOCK5</i> | miR-1179                              | 1 |
| <i>circDOCK5</i> | miR-1253                              | 1 |
| <i>circDOCK5</i> | miR-1265                              | 1 |
| <i>circDOCK5</i> | miR-185-5p                            | 1 |
| <i>circDOCK5</i> | miR-203b-3p                           | 1 |
| <i>circDOCK5</i> | miR-211-3p                            | 2 |
| <i>circDOCK5</i> | miR-2276-3p                           | 5 |
| <i>circDOCK5</i> | miR-3173-3p/6891-5p                   | 1 |
| <i>circDOCK5</i> | miR-3611                              | 1 |
| <i>circDOCK5</i> | miR-3670                              | 1 |
| <i>circDOCK5</i> | miR-3925-3p                           | 2 |
| <i>circDOCK5</i> | miR-4318                              | 1 |
| <i>circDOCK5</i> | miR-4428                              | 1 |
| <i>circDOCK5</i> | miR-4501                              | 1 |
| <i>circDOCK5</i> | miR-4686                              | 1 |
| <i>circDOCK5</i> | miR-4708-3p                           | 2 |
| <i>circDOCK5</i> | miR-4764-5p                           | 1 |
| <i>circDOCK5</i> | miR-4772-3p                           | 5 |
| <i>circDOCK5</i> | miR-515-5p/519e-5p                    | 1 |
| <i>circDOCK5</i> | miR-5192                              | 1 |
| <i>circDOCK5</i> | miR-526b-5p                           | 2 |
| <i>circDOCK5</i> | miR-580-3p                            | 1 |
| <i>circDOCK5</i> | miR-597-5p                            | 1 |
| <i>circDOCK5</i> | miR-6770-5p                           | 1 |
| <i>circDOCK5</i> | miR-6830-5p                           | 2 |
| <i>circDOCK5</i> | miR-6879-3p                           | 1 |
| <i>circDOCK5</i> | miR-6888-5p                           | 1 |
| <i>circDOCK5</i> | miR-7158-3p                           | 1 |
| <i>circDOCK5</i> | miR-766-3p                            | 2 |
| <i>circDOCK5</i> | miR-892a                              | 1 |
| <i>circDOCK5</i> | let-7a-3p/let-7b-3p/let-7f-1-3p/98-3p | 1 |
| <i>circDOCK5</i> | let-7f-2-3p/1185-3p                   | 1 |
| <i>circDOCK5</i> | miR-103-3p/107                        | 1 |
| <i>circDOCK5</i> | miR-103a-2-5p                         | 1 |
| <i>circDOCK5</i> | miR-1184                              | 1 |
| <i>circDOCK5</i> | miR-1193                              | 1 |

|                  |                                      |   |
|------------------|--------------------------------------|---|
| <i>circDOCK5</i> | miR-1205                             | 1 |
| <i>circDOCK5</i> | miR-1208                             | 3 |
| <i>circDOCK5</i> | miR-1225-5p                          | 1 |
| <i>circDOCK5</i> | miR-1229-3p                          | 2 |
| <i>circDOCK5</i> | miR-1229-5p                          | 1 |
| <i>circDOCK5</i> | miR-1236-3p                          | 1 |
| <i>circDOCK5</i> | miR-124-5p                           | 2 |
| <i>circDOCK5</i> | miR-1244                             | 1 |
| <i>circDOCK5</i> | miR-1255b-2-3p                       | 1 |
| <i>circDOCK5</i> | miR-1258                             | 1 |
| <i>circDOCK5</i> | miR-1260a/1260b                      | 1 |
| <i>circDOCK5</i> | miR-1263                             | 2 |
| <i>circDOCK5</i> | miR-1269                             | 4 |
| <i>circDOCK5</i> | miR-1273e                            | 1 |
| <i>circDOCK5</i> | miR-1273h-3p                         | 2 |
| <i>circDOCK5</i> | miR-1276                             | 1 |
| <i>circDOCK5</i> | miR-1286                             | 1 |
| <i>circDOCK5</i> | miR-1288-3p                          | 4 |
| <i>circDOCK5</i> | miR-129-3p                           | 1 |
| <i>circDOCK5</i> | miR-1298-3p                          | 1 |
| <i>circDOCK5</i> | miR-1301-5p/6502-5p                  | 1 |
| <i>circDOCK5</i> | miR-1304-3p                          | 1 |
| <i>circDOCK5</i> | miR-1324                             | 2 |
| <i>circDOCK5</i> | miR-134-3p                           | 1 |
| <i>circDOCK5</i> | miR-138-2-3p                         | 2 |
| <i>circDOCK5</i> | miR-141-3p/200-3p                    | 1 |
| <i>circDOCK5</i> | miR-141-5p                           | 3 |
| <i>circDOCK5</i> | miR-142-3p.1                         | 1 |
| <i>circDOCK5</i> | miR-142-5p                           | 2 |
| <i>circDOCK5</i> | miR-1470                             | 1 |
| <i>circDOCK5</i> | miR-148a-5p                          | 4 |
| <i>circDOCK5</i> | miR-148b-5p/6874-3p                  | 3 |
| <i>circDOCK5</i> | miR-15-5p/16-5p/195-5p/424-5p/497-5p | 1 |
| <i>circDOCK5</i> | miR-150-3p                           | 2 |
| <i>circDOCK5</i> | miR-150-5p                           | 2 |
| <i>circDOCK5</i> | miR-152-5p                           | 2 |
| <i>circDOCK5</i> | miR-154-3p/487-3p                    | 1 |
| <i>circDOCK5</i> | miR-154-5p                           | 1 |



|                  |                                     |   |
|------------------|-------------------------------------|---|
| <i>circDOCK5</i> | miR-15a-3p                          | 4 |
| <i>circDOCK5</i> | miR-17-3p                           | 1 |
| <i>circDOCK5</i> | miR-17-5p/20-5p/93-5p/106-5p/519-3p | 3 |
| <i>circDOCK5</i> | miR-181-3p/4420                     | 2 |
| <i>circDOCK5</i> | miR-181-5p                          | 1 |
| <i>circDOCK5</i> | miR-183-3p                          | 1 |
| <i>circDOCK5</i> | miR-186-3p                          | 1 |
| <i>circDOCK5</i> | miR-188-3p                          | 1 |
| <i>circDOCK5</i> | miR-188-5p                          | 1 |
| <i>circDOCK5</i> | miR-18a-3p                          | 2 |
| <i>circDOCK5</i> | miR-18b-3p                          | 1 |
| <i>circDOCK5</i> | miR-19-5p                           | 1 |
| <i>circDOCK5</i> | miR-1909-3p/6722-3p                 | 1 |
| <i>circDOCK5</i> | miR-193-3p                          | 3 |
| <i>circDOCK5</i> | miR-193a-5p                         | 1 |
| <i>circDOCK5</i> | miR-197-5p/3132                     | 1 |
| <i>circDOCK5</i> | miR-200-3p/429                      | 1 |
| <i>circDOCK5</i> | miR-204-5p/211-5p                   | 1 |
| <i>circDOCK5</i> | miR-2052                            | 1 |
| <i>circDOCK5</i> | miR-20a-3p                          | 2 |
| <i>circDOCK5</i> | miR-2115-5p                         | 1 |
| <i>circDOCK5</i> | miR-2116-3p                         | 2 |
| <i>circDOCK5</i> | miR-2116-5p                         | 2 |
| <i>circDOCK5</i> | miR-2117                            | 3 |
| <i>circDOCK5</i> | miR-212-5p                          | 1 |
| <i>circDOCK5</i> | miR-214-3p/3619-5p                  | 2 |
| <i>circDOCK5</i> | miR-218-5p                          | 1 |
| <i>circDOCK5</i> | miR-219-5p                          | 1 |
| <i>circDOCK5</i> | miR-22-3p                           | 1 |
| <i>circDOCK5</i> | miR-22-5p                           | 2 |
| <i>circDOCK5</i> | miR-23-3p                           | 2 |
| <i>circDOCK5</i> | miR-2392                            | 2 |
| <i>circDOCK5</i> | miR-24-5p                           | 1 |
| <i>circDOCK5</i> | miR-26-3p                           | 1 |
| <i>circDOCK5</i> | miR-2681-5p                         | 1 |
| <i>circDOCK5</i> | miR-27b-5p                          | 1 |
| <i>circDOCK5</i> | miR-299-3p                          | 1 |
| <i>circDOCK5</i> | miR-29a-5p                          | 1 |

|                  |                   |   |
|------------------|-------------------|---|
| <i>circDOCK5</i> | miR-29b-1-5p      | 3 |
| <i>circDOCK5</i> | miR-30-5p         | 1 |
| <i>circDOCK5</i> | miR-3126-3p       | 1 |
| <i>circDOCK5</i> | miR-3127-5p       | 1 |
| <i>circDOCK5</i> | miR-3128          | 3 |
| <i>circDOCK5</i> | miR-3134          | 2 |
| <i>circDOCK5</i> | miR-3138          | 2 |
| <i>circDOCK5</i> | miR-3156-3p       | 1 |
| <i>circDOCK5</i> | miR-3158-5p       | 1 |
| <i>circDOCK5</i> | miR-3159          | 1 |
| <i>circDOCK5</i> | miR-3160-3p       | 1 |
| <i>circDOCK5</i> | miR-3161          | 2 |
| <i>circDOCK5</i> | miR-3163          | 2 |
| <i>circDOCK5</i> | miR-3166          | 2 |
| <i>circDOCK5</i> | miR-3168          | 3 |
| <i>circDOCK5</i> | miR-3176/3922-3p  | 3 |
| <i>circDOCK5</i> | miR-3189-3p       | 1 |
| <i>circDOCK5</i> | miR-3189-5p       | 1 |
| <i>circDOCK5</i> | miR-3190-5p       | 3 |
| <i>circDOCK5</i> | miR-3191-5p       | 2 |
| <i>circDOCK5</i> | miR-3194-3p       | 1 |
| <i>circDOCK5</i> | miR-3202          | 1 |
| <i>circDOCK5</i> | miR-324-3p/1913   | 2 |
| <i>circDOCK5</i> | miR-324-5p        | 2 |
| <i>circDOCK5</i> | miR-325           | 1 |
| <i>circDOCK5</i> | miR-328-3p        | 2 |
| <i>circDOCK5</i> | miR-329-3p/362-3p | 1 |
| <i>circDOCK5</i> | miR-329-5p        | 2 |
| <i>circDOCK5</i> | miR-3606-5p       | 1 |
| <i>circDOCK5</i> | miR-3607-3p       | 1 |
| <i>circDOCK5</i> | miR-3616-3p       | 2 |
| <i>circDOCK5</i> | miR-3650          | 2 |
| <i>circDOCK5</i> | miR-3652/4430     | 1 |
| <i>circDOCK5</i> | miR-3663-5p       | 2 |
| <i>circDOCK5</i> | miR-3664-5p       | 2 |
| <i>circDOCK5</i> | miR-3671          | 1 |
| <i>circDOCK5</i> | miR-3675-3p       | 1 |
| <i>circDOCK5</i> | miR-3678-3p       | 2 |

|                  |                           |   |
|------------------|---------------------------|---|
| <i>circDOCK5</i> | miR-3679-3p               | 2 |
| <i>circDOCK5</i> | miR-3681-5p               | 4 |
| <i>circDOCK5</i> | miR-3684                  | 1 |
| <i>circDOCK5</i> | miR-3689d/6851-5p         | 8 |
| <i>circDOCK5</i> | miR-3691-5p               | 2 |
| <i>circDOCK5</i> | miR-371-5p                | 1 |
| <i>circDOCK5</i> | miR-371b-5p/373-5p/616-5p | 1 |
| <i>circDOCK5</i> | miR-372-5p                | 1 |
| <i>circDOCK5</i> | miR-375                   | 2 |
| <i>circDOCK5</i> | miR-376-3p                | 3 |
| <i>circDOCK5</i> | miR-376c-3p               | 2 |
| <i>circDOCK5</i> | miR-377-5p/6086           | 2 |
| <i>circDOCK5</i> | miR-381-3p                | 1 |
| <i>circDOCK5</i> | miR-3911                  | 2 |
| <i>circDOCK5</i> | miR-3919                  | 2 |
| <i>circDOCK5</i> | miR-3929/4419b/4478       | 1 |
| <i>circDOCK5</i> | miR-3945                  | 1 |
| <i>circDOCK5</i> | miR-3973                  | 2 |
| <i>circDOCK5</i> | miR-3976                  | 2 |
| <i>circDOCK5</i> | miR-3977                  | 1 |
| <i>circDOCK5</i> | miR-409-3p                | 2 |
| <i>circDOCK5</i> | miR-411-5p.2              | 1 |
| <i>circDOCK5</i> | miR-4253/6862-5p          | 1 |
| <i>circDOCK5</i> | miR-4265/4296/4322        | 1 |
| <i>circDOCK5</i> | miR-4271/4725-3p/6780b-5p | 1 |
| <i>circDOCK5</i> | miR-4273/7156-5p          | 3 |
| <i>circDOCK5</i> | miR-4278                  | 1 |
| <i>circDOCK5</i> | miR-4289                  | 1 |
| <i>circDOCK5</i> | miR-4291                  | 1 |
| <i>circDOCK5</i> | miR-4311                  | 1 |
| <i>circDOCK5</i> | miR-4314                  | 2 |
| <i>circDOCK5</i> | miR-432-3p                | 2 |
| <i>circDOCK5</i> | miR-432-5p                | 1 |
| <i>circDOCK5</i> | miR-4426/4647/4662b       | 2 |
| <i>circDOCK5</i> | miR-4443                  | 4 |
| <i>circDOCK5</i> | miR-4445-5p               | 1 |
| <i>circDOCK5</i> | miR-4450                  | 1 |
| <i>circDOCK5</i> | miR-4452                  | 1 |

|                  |                             |   |
|------------------|-----------------------------|---|
| <i>circDOCK5</i> | miR-4461                    | 1 |
| <i>circDOCK5</i> | miR-4470                    | 1 |
| <i>circDOCK5</i> | miR-4487                    | 1 |
| <i>circDOCK5</i> | miR-4491/4657               | 1 |
| <i>circDOCK5</i> | miR-4493                    | 2 |
| <i>circDOCK5</i> | miR-4504                    | 1 |
| <i>circDOCK5</i> | miR-4505/5787               | 1 |
| <i>circDOCK5</i> | miR-4512                    | 2 |
| <i>circDOCK5</i> | miR-4515                    | 4 |
| <i>circDOCK5</i> | miR-452-5p/892-3p           | 1 |
| <i>circDOCK5</i> | miR-4527/6503-5p            | 2 |
| <i>circDOCK5</i> | miR-4529-5p                 | 4 |
| <i>circDOCK5</i> | miR-4532                    | 1 |
| <i>circDOCK5</i> | miR-4533                    | 1 |
| <i>circDOCK5</i> | miR-4534/8082               | 2 |
| <i>circDOCK5</i> | miR-4635                    | 2 |
| <i>circDOCK5</i> | miR-4640-5p                 | 2 |
| <i>circDOCK5</i> | miR-4666a-3p                | 1 |
| <i>circDOCK5</i> | miR-4667-3p                 | 1 |
| <i>circDOCK5</i> | miR-4668-3p                 | 1 |
| <i>circDOCK5</i> | miR-4670-3p                 | 2 |
| <i>circDOCK5</i> | miR-4677-5p                 | 3 |
| <i>circDOCK5</i> | miR-4684-3p                 | 2 |
| <i>circDOCK5</i> | miR-4684-5p                 | 2 |
| <i>circDOCK5</i> | miR-4687-5p                 | 1 |
| <i>circDOCK5</i> | miR-4690-5p                 | 1 |
| <i>circDOCK5</i> | miR-4693-3p                 | 1 |
| <i>circDOCK5</i> | miR-4695-3p                 | 3 |
| <i>circDOCK5</i> | miR-4699-5p                 | 2 |
| <i>circDOCK5</i> | miR-4709-3p                 | 2 |
| <i>circDOCK5</i> | miR-4711-5p                 | 1 |
| <i>circDOCK5</i> | miR-4714-5p                 | 2 |
| <i>circDOCK5</i> | miR-4717-5p                 | 2 |
| <i>circDOCK5</i> | miR-4720-5p/4799-3p/5588-5p | 3 |
| <i>circDOCK5</i> | miR-4721                    | 2 |
| <i>circDOCK5</i> | miR-4722-5p                 | 1 |
| <i>circDOCK5</i> | miR-4724-5p                 | 2 |
| <i>circDOCK5</i> | miR-4727-5p                 | 1 |

|                  |                             |   |
|------------------|-----------------------------|---|
| <i>circDOCK5</i> | miR-4731-5p                 | 2 |
| <i>circDOCK5</i> | miR-4732-5p                 | 2 |
| <i>circDOCK5</i> | miR-4733-5p                 | 1 |
| <i>circDOCK5</i> | miR-4740-5p                 | 4 |
| <i>circDOCK5</i> | miR-4747-5p/5196-5p         | 1 |
| <i>circDOCK5</i> | miR-4752                    | 2 |
| <i>circDOCK5</i> | miR-4753-3p                 | 1 |
| <i>circDOCK5</i> | miR-4755-5p/5006-3p         | 1 |
| <i>circDOCK5</i> | miR-4756-3p                 | 2 |
| <i>circDOCK5</i> | miR-4757-5p/6744-3p         | 1 |
| <i>circDOCK5</i> | miR-4758-3p                 | 1 |
| <i>circDOCK5</i> | miR-4760-5p/8061            | 1 |
| <i>circDOCK5</i> | miR-4762-5p                 | 3 |
| <i>circDOCK5</i> | miR-4768-5p/6833-3p         | 3 |
| <i>circDOCK5</i> | miR-4771                    | 2 |
| <i>circDOCK5</i> | miR-4781-3p                 | 2 |
| <i>circDOCK5</i> | miR-4789-5p                 | 1 |
| <i>circDOCK5</i> | miR-4799-5p                 | 2 |
| <i>circDOCK5</i> | miR-4800-5p                 | 2 |
| <i>circDOCK5</i> | miR-489-3p                  | 2 |
| <i>circDOCK5</i> | miR-489-5p                  | 2 |
| <i>circDOCK5</i> | miR-496.1                   | 1 |
| <i>circDOCK5</i> | miR-5000-5p                 | 2 |
| <i>circDOCK5</i> | miR-5001-3p                 | 1 |
| <i>circDOCK5</i> | miR-5008-3p/6737-3p/7157-3p | 1 |
| <i>circDOCK5</i> | miR-5008-5p                 | 2 |
| <i>circDOCK5</i> | miR-5009-5p/8058            | 4 |
| <i>circDOCK5</i> | miR-500a-5p                 | 1 |
| <i>circDOCK5</i> | miR-502-5p                  | 1 |
| <i>circDOCK5</i> | miR-503-3p                  | 1 |
| <i>circDOCK5</i> | miR-503-5p                  | 1 |
| <i>circDOCK5</i> | miR-505-5p                  | 1 |
| <i>circDOCK5</i> | miR-508-3p                  | 1 |
| <i>circDOCK5</i> | miR-5089-3p                 | 1 |
| <i>circDOCK5</i> | miR-5092                    | 1 |
| <i>circDOCK5</i> | miR-513c-5p/514b-5p         | 1 |
| <i>circDOCK5</i> | miR-514a-5p                 | 2 |
| <i>circDOCK5</i> | miR-516a-3p/516b-3p/7162-5p | 1 |

|                  |                      |   |
|------------------|----------------------|---|
| <i>circDOCK5</i> | miR-5187-5p          | 1 |
| <i>circDOCK5</i> | miR-519d-5p          | 1 |
| <i>circDOCK5</i> | miR-520f-5p          | 2 |
| <i>circDOCK5</i> | miR-520g-3p          | 2 |
| <i>circDOCK5</i> | miR-524-5p           | 1 |
| <i>circDOCK5</i> | miR-532-3p           | 2 |
| <i>circDOCK5</i> | miR-539-3p           | 1 |
| <i>circDOCK5</i> | miR-542-3p           | 1 |
| <i>circDOCK5</i> | miR-544a             | 1 |
| <i>circDOCK5</i> | miR-548ah-5p/3609    | 3 |
| <i>circDOCK5</i> | miR-548at-5p         | 2 |
| <i>circDOCK5</i> | miR-548av-3p         | 1 |
| <i>circDOCK5</i> | miR-548az-5p/548t-5p | 2 |
| <i>circDOCK5</i> | miR-548c-3p          | 1 |
| <i>circDOCK5</i> | miR-548n             | 2 |
| <i>circDOCK5</i> | miR-5571-5p          | 1 |
| <i>circDOCK5</i> | miR-5579-5p          | 2 |
| <i>circDOCK5</i> | miR-558              | 1 |
| <i>circDOCK5</i> | miR-5580-3p          | 1 |
| <i>circDOCK5</i> | miR-5581-3p          | 1 |
| <i>circDOCK5</i> | miR-5584-3p          | 3 |
| <i>circDOCK5</i> | miR-5589-5p          | 2 |
| <i>circDOCK5</i> | miR-561-3p           | 2 |
| <i>circDOCK5</i> | miR-5680             | 2 |
| <i>circDOCK5</i> | miR-5691             | 2 |
| <i>circDOCK5</i> | miR-5695             | 1 |
| <i>circDOCK5</i> | miR-5699-5p          | 1 |
| <i>circDOCK5</i> | miR-573/3616-5p      | 2 |
| <i>circDOCK5</i> | miR-578              | 2 |
| <i>circDOCK5</i> | miR-583              | 1 |
| <i>circDOCK5</i> | miR-586              | 1 |
| <i>circDOCK5</i> | miR-587              | 3 |
| <i>circDOCK5</i> | miR-591              | 1 |
| <i>circDOCK5</i> | miR-592              | 1 |
| <i>circDOCK5</i> | miR-593-3p           | 1 |
| <i>circDOCK5</i> | miR-597-3p           | 2 |
| <i>circDOCK5</i> | miR-599              | 1 |
| <i>circDOCK5</i> | miR-603              | 1 |

|                  |                     |   |
|------------------|---------------------|---|
| <i>circDOCK5</i> | miR-605-3p          | 2 |
| <i>circDOCK5</i> | miR-605-5p          | 2 |
| <i>circDOCK5</i> | miR-6071            | 1 |
| <i>circDOCK5</i> | miR-6072/6891-3p    | 1 |
| <i>circDOCK5</i> | miR-6073            | 1 |
| <i>circDOCK5</i> | miR-6089            | 2 |
| <i>circDOCK5</i> | miR-6126            | 1 |
| <i>circDOCK5</i> | miR-6132/6836-5p    | 1 |
| <i>circDOCK5</i> | miR-615-5p          | 1 |
| <i>circDOCK5</i> | miR-6165            | 1 |
| <i>circDOCK5</i> | miR-618             | 2 |
| <i>circDOCK5</i> | miR-623             | 1 |
| <i>circDOCK5</i> | miR-625-3p          | 1 |
| <i>circDOCK5</i> | miR-628-3p          | 1 |
| <i>circDOCK5</i> | miR-635/6774-5p     | 1 |
| <i>circDOCK5</i> | miR-642b-5p         | 1 |
| <i>circDOCK5</i> | miR-644a            | 2 |
| <i>circDOCK5</i> | miR-646             | 1 |
| <i>circDOCK5</i> | miR-6502-3p         | 1 |
| <i>circDOCK5</i> | miR-6508-3p         | 2 |
| <i>circDOCK5</i> | miR-6509-5p         | 1 |
| <i>circDOCK5</i> | miR-6510-5p         | 1 |
| <i>circDOCK5</i> | miR-6511-3p         | 1 |
| <i>circDOCK5</i> | miR-6511-5p         | 2 |
| <i>circDOCK5</i> | miR-6515-3p         | 1 |
| <i>circDOCK5</i> | miR-6515-5p         | 4 |
| <i>circDOCK5</i> | miR-6516-5p         | 2 |
| <i>circDOCK5</i> | miR-653-3p          | 2 |
| <i>circDOCK5</i> | miR-655-5p          | 2 |
| <i>circDOCK5</i> | miR-664a-3p         | 1 |
| <i>circDOCK5</i> | miR-6728-3p         | 4 |
| <i>circDOCK5</i> | miR-6729-3p         | 2 |
| <i>circDOCK5</i> | miR-6731-3p         | 1 |
| <i>circDOCK5</i> | miR-6738-3p         | 1 |
| <i>circDOCK5</i> | miR-6739-3p         | 2 |
| <i>circDOCK5</i> | miR-6748-5p         | 1 |
| <i>circDOCK5</i> | miR-6753-3p/7107-3p | 2 |
| <i>circDOCK5</i> | miR-6757-3p         | 2 |

|                  |                     |   |
|------------------|---------------------|---|
| <i>circDOCK5</i> | miR-6758-3p         | 1 |
| <i>circDOCK5</i> | miR-6758-5p/6856-5p | 4 |
| <i>circDOCK5</i> | miR-6759-5p         | 1 |
| <i>circDOCK5</i> | miR-6760-3p         | 3 |
| <i>circDOCK5</i> | miR-6763-3p         | 2 |
| <i>circDOCK5</i> | miR-6776-5p         | 3 |
| <i>circDOCK5</i> | miR-6779-3p         | 1 |
| <i>circDOCK5</i> | miR-6780a-3p        | 4 |
| <i>circDOCK5</i> | miR-6782-5p         | 1 |
| <i>circDOCK5</i> | miR-6783-5p         | 2 |
| <i>circDOCK5</i> | miR-6784-3p/6862-3p | 1 |
| <i>circDOCK5</i> | miR-6789-5p         | 1 |
| <i>circDOCK5</i> | miR-6793-3p         | 1 |
| <i>circDOCK5</i> | miR-6793-5p         | 1 |
| <i>circDOCK5</i> | miR-6796-5p         | 1 |
| <i>circDOCK5</i> | miR-6798-5p         | 2 |
| <i>circDOCK5</i> | miR-6800-5p         | 2 |
| <i>circDOCK5</i> | miR-6801-5p         | 2 |
| <i>circDOCK5</i> | miR-6802-3p         | 1 |
| <i>circDOCK5</i> | miR-6802-5p         | 2 |
| <i>circDOCK5</i> | miR-6809-3p         | 3 |
| <i>circDOCK5</i> | miR-6815-3p         | 1 |
| <i>circDOCK5</i> | miR-6824-5p         | 1 |
| <i>circDOCK5</i> | miR-6828-3p         | 1 |
| <i>circDOCK5</i> | miR-6832-3p         | 1 |
| <i>circDOCK5</i> | miR-6832-5p         | 2 |
| <i>circDOCK5</i> | miR-6833-5p         | 2 |
| <i>circDOCK5</i> | miR-6843-3p/6848-3p | 2 |
| <i>circDOCK5</i> | miR-6844            | 2 |
| <i>circDOCK5</i> | miR-6861-5p         | 3 |
| <i>circDOCK5</i> | miR-6864-5p         | 1 |
| <i>circDOCK5</i> | miR-6865-3p         | 1 |
| <i>circDOCK5</i> | miR-6866-5p         | 4 |
| <i>circDOCK5</i> | miR-6868-5p         | 3 |
| <i>circDOCK5</i> | miR-6872-3p         | 1 |
| <i>circDOCK5</i> | miR-6873-5p         | 2 |
| <i>circDOCK5</i> | miR-6878-3p         | 1 |
| <i>circDOCK5</i> | miR-6881-3p         | 4 |



|                  |                     |   |
|------------------|---------------------|---|
| <i>circDOCK5</i> | miR-6882-3p         | 3 |
| <i>circDOCK5</i> | miR-6883-3p         | 1 |
| <i>circDOCK5</i> | miR-6889-3p         | 1 |
| <i>circDOCK5</i> | miR-6890-3p         | 1 |
| <i>circDOCK5</i> | miR-6895-3p         | 1 |
| <i>circDOCK5</i> | miR-6895-5p         | 2 |
| <i>circDOCK5</i> | miR-7111-3p         | 4 |
| <i>circDOCK5</i> | miR-7112-3p         | 1 |
| <i>circDOCK5</i> | miR-7152-3p         | 2 |
| <i>circDOCK5</i> | miR-7160-3p         | 2 |
| <i>circDOCK5</i> | miR-744-3p          | 3 |
| <i>circDOCK5</i> | miR-764             | 1 |
| <i>circDOCK5</i> | miR-7641            | 1 |
| <i>circDOCK5</i> | miR-7704            | 1 |
| <i>circDOCK5</i> | miR-7977            | 1 |
| <i>circDOCK5</i> | miR-8056            | 2 |
| <i>circDOCK5</i> | miR-8069            | 2 |
| <i>circDOCK5</i> | miR-8070            | 1 |
| <i>circDOCK5</i> | miR-8084            | 1 |
| <i>circDOCK5</i> | miR-8485            | 1 |
| <i>circDOCK5</i> | miR-873-5p.2        | 1 |
| <i>circDOCK5</i> | miR-874-5p          | 2 |
| <i>circDOCK5</i> | miR-877-5p          | 4 |
| <i>circDOCK5</i> | miR-921             | 1 |
| <i>circDOCK5</i> | miR-922             | 2 |
| <i>circDOCK5</i> | miR-942-5p          | 3 |
| <i>circDOCK5</i> | miR-106a-3p         | 1 |
| <i>circDOCK5</i> | miR-1178-3p         | 2 |
| <i>circDOCK5</i> | miR-1178-5p         | 1 |
| <i>circDOCK5</i> | miR-1182            | 1 |
| <i>circDOCK5</i> | miR-122-5p          | 5 |
| <i>circDOCK5</i> | miR-1224-5p         | 1 |
| <i>circDOCK5</i> | miR-1236-5p         | 1 |
| <i>circDOCK5</i> | miR-1238-5p/4758-5p | 1 |
| <i>circDOCK5</i> | miR-1243            | 1 |
| <i>circDOCK5</i> | miR-1251-3p         | 1 |
| <i>circDOCK5</i> | miR-125b-1-3p       | 2 |
| <i>circDOCK5</i> | miR-125b-2-3p       | 2 |

|                  |                                              |   |
|------------------|----------------------------------------------|---|
| <i>circDOCK5</i> | miR-1270                                     | 1 |
| <i>circDOCK5</i> | miR-1288-5p                                  | 1 |
| <i>circDOCK5</i> | miR-1291/6775-3p                             | 1 |
| <i>circDOCK5</i> | miR-1302/4298                                | 5 |
| <i>circDOCK5</i> | miR-130b-5p                                  | 1 |
| <i>circDOCK5</i> | miR-1343-3p                                  | 1 |
| <i>circDOCK5</i> | miR-145-5p                                   | 1 |
| <i>circDOCK5</i> | miR-146b-3p                                  | 1 |
| <i>circDOCK5</i> | miR-1539                                     | 1 |
| <i>circDOCK5</i> | miR-1587/3620-5p                             | 2 |
| <i>circDOCK5</i> | miR-183-5p.2                                 | 3 |
| <i>circDOCK5</i> | miR-191-3p                                   | 1 |
| <i>circDOCK5</i> | miR-192-5p/215-5p                            | 2 |
| <i>circDOCK5</i> | miR-203a-3p.1                                | 5 |
| <i>circDOCK5</i> | miR-204-3p/4646-5p                           | 3 |
| <i>circDOCK5</i> | miR-2113                                     | 1 |
| <i>circDOCK5</i> | miR-24-3p                                    | 2 |
| <i>circDOCK5</i> | miR-26b-3p                                   | 2 |
| <i>circDOCK5</i> | miR-2909                                     | 1 |
| <i>circDOCK5</i> | miR-302a-5p                                  | 1 |
| <i>circDOCK5</i> | miR-30b-3p/1273h-5p/3689-3p/6779-5p/6780a-5p |   |
| <i>circDOCK5</i> | miR-30c-3p/6788-5p                           | 1 |
| <i>circDOCK5</i> | miR-3119                                     | 1 |
| <i>circDOCK5</i> | miR-3121-5p                                  | 1 |
| <i>circDOCK5</i> | miR-3122/3913-5p                             | 1 |
| <i>circDOCK5</i> | miR-3136-5p/4439                             | 1 |
| <i>circDOCK5</i> | miR-3140-3p                                  | 4 |
| <i>circDOCK5</i> | miR-3145-5p                                  | 1 |
| <i>circDOCK5</i> | miR-3147                                     | 1 |
| <i>circDOCK5</i> | miR-3150b-3p                                 | 1 |
| <i>circDOCK5</i> | miR-3151-3p                                  | 1 |
| <i>circDOCK5</i> | miR-3160-5p                                  | 1 |
| <i>circDOCK5</i> | miR-3173-5p                                  | 1 |
| <i>circDOCK5</i> | miR-3174                                     | 1 |
| <i>circDOCK5</i> | miR-3183/4723-3p/6769b-3p                    | 1 |
| <i>circDOCK5</i> | miR-3185                                     | 2 |
| <i>circDOCK5</i> | miR-3192-5p                                  | 3 |
| <i>circDOCK5</i> | miR-3199/8052                                | 2 |

|                  |                                   |   |
|------------------|-----------------------------------|---|
| <i>circDOCK5</i> | miR-326                           | 4 |
| <i>circDOCK5</i> | miR-3610                          | 1 |
| <i>circDOCK5</i> | miR-3620-3p                       | 2 |
| <i>circDOCK5</i> | miR-3622a-3p/3622b-3p             | 2 |
| <i>circDOCK5</i> | miR-3651                          | 2 |
| <i>circDOCK5</i> | miR-3654                          | 1 |
| <i>circDOCK5</i> | miR-365a-5p/365b-5p               | 2 |
| <i>circDOCK5</i> | miR-3689a-5p/3689b-5p/3689e/3689f | 1 |
| <i>circDOCK5</i> | miR-3907                          | 1 |
| <i>circDOCK5</i> | miR-3915                          | 1 |
| <i>circDOCK5</i> | miR-3934-3p                       | 2 |
| <i>circDOCK5</i> | miR-4279                          | 3 |
| <i>circDOCK5</i> | miR-4284                          | 2 |
| <i>circDOCK5</i> | miR-4299                          | 2 |
| <i>circDOCK5</i> | miR-4330                          | 1 |
| <i>circDOCK5</i> | miR-4417                          | 1 |
| <i>circDOCK5</i> | miR-4425                          | 1 |
| <i>circDOCK5</i> | miR-4437                          | 2 |
| <i>circDOCK5</i> | miR-4454                          | 1 |
| <i>circDOCK5</i> | miR-4455                          | 1 |
| <i>circDOCK5</i> | miR-4456                          | 2 |
| <i>circDOCK5</i> | miR-4475                          | 1 |
| <i>circDOCK5</i> | miR-4481/4745-5p                  | 4 |
| <i>circDOCK5</i> | miR-4494                          | 1 |
| <i>circDOCK5</i> | miR-450a-1-3p                     | 1 |
| <i>circDOCK5</i> | miR-451                           | 1 |
| <i>circDOCK5</i> | miR-4511                          | 1 |
| <i>circDOCK5</i> | miR-4513/6855-3p                  | 1 |
| <i>circDOCK5</i> | miR-4521                          | 1 |
| <i>circDOCK5</i> | miR-4522                          | 1 |
| <i>circDOCK5</i> | miR-4531                          | 1 |
| <i>circDOCK5</i> | miR-4649-3p                       | 1 |
| <i>circDOCK5</i> | miR-4658/6790-5p                  | 1 |
| <i>circDOCK5</i> | miR-4674                          | 2 |
| <i>circDOCK5</i> | miR-4689/6858-5p                  | 1 |
| <i>circDOCK5</i> | miR-4694-3p                       | 1 |
| <i>circDOCK5</i> | miR-4694-5p                       | 2 |
| <i>circDOCK5</i> | miR-4695-5p                       | 1 |

|                  |                       |   |
|------------------|-----------------------|---|
| <i>circDOCK5</i> | miR-4747-3p           | 1 |
| <i>circDOCK5</i> | miR-4765              | 1 |
| <i>circDOCK5</i> | miR-4779              | 1 |
| <i>circDOCK5</i> | miR-499b-5p           | 1 |
| <i>circDOCK5</i> | miR-5010-3p           | 1 |
| <i>circDOCK5</i> | miR-508-5p            | 1 |
| <i>circDOCK5</i> | miR-518c-5p           | 4 |
| <i>circDOCK5</i> | miR-522-3p            | 1 |
| <i>circDOCK5</i> | miR-548b-3p           | 1 |
| <i>circDOCK5</i> | miR-548q              | 2 |
| <i>circDOCK5</i> | miR-561-5p            | 1 |
| <i>circDOCK5</i> | miR-5683              | 2 |
| <i>circDOCK5</i> | miR-593-5p            | 2 |
| <i>circDOCK5</i> | miR-6070              | 1 |
| <i>circDOCK5</i> | miR-609               | 1 |
| <i>circDOCK5</i> | miR-6134              | 8 |
| <i>circDOCK5</i> | miR-619-3p            | 3 |
| <i>circDOCK5</i> | miR-619-5p/6506-5p    | 3 |
| <i>circDOCK5</i> | miR-622               | 1 |
| <i>circDOCK5</i> | miR-627-3p            | 2 |
| <i>circDOCK5</i> | miR-628-5p            | 1 |
| <i>circDOCK5</i> | miR-629-3p            | 2 |
| <i>circDOCK5</i> | miR-631/3661          | 1 |
| <i>circDOCK5</i> | miR-636               | 3 |
| <i>circDOCK5</i> | miR-639               | 1 |
| <i>circDOCK5</i> | miR-640               | 1 |
| <i>circDOCK5</i> | miR-6513-5p           | 1 |
| <i>circDOCK5</i> | miR-654-5p            | 4 |
| <i>circDOCK5</i> | miR-671-3p            | 1 |
| <i>circDOCK5</i> | miR-6742-3p           | 1 |
| <i>circDOCK5</i> | miR-6752-3p           | 1 |
| <i>circDOCK5</i> | miR-676-5p            | 1 |
| <i>circDOCK5</i> | miR-6764-3p/6824-3p   | 4 |
| <i>circDOCK5</i> | miR-6765-3p           | 2 |
| <i>circDOCK5</i> | miR-6769a-5p/6769b-5p | 4 |
| <i>circDOCK5</i> | miR-6772-5p           | 1 |
| <i>circDOCK5</i> | miR-6804-3p           | 1 |
| <i>circDOCK5</i> | miR-6815-5p/6865-5p   | 7 |

|                  |                     |   |
|------------------|---------------------|---|
| <i>circDOCK5</i> | miR-6817-3p         | 1 |
| <i>circDOCK5</i> | miR-6830-3p         | 1 |
| <i>circDOCK5</i> | miR-6847-3p         | 3 |
| <i>circDOCK5</i> | miR-6851-3p         | 1 |
| <i>circDOCK5</i> | miR-6852-5p         | 1 |
| <i>circDOCK5</i> | miR-6857-3p         | 1 |
| <i>circDOCK5</i> | miR-6870-3p         | 1 |
| <i>circDOCK5</i> | miR-6884-3p         | 2 |
| <i>circDOCK5</i> | miR-6892-5p         | 1 |
| <i>circDOCK5</i> | miR-7110-3p         | 1 |
| <i>circDOCK5</i> | miR-7151-5p         | 1 |
| <i>circDOCK5</i> | miR-7158-5p         | 1 |
| <i>circDOCK5</i> | miR-7161-3p         | 1 |
| <i>circDOCK5</i> | miR-7162-3p         | 1 |
| <i>circDOCK5</i> | miR-7845-5p         | 1 |
| <i>circDOCK5</i> | miR-7847-3p         | 7 |
| <i>circDOCK5</i> | miR-7851-3p         | 3 |
| <i>circDOCK5</i> | miR-7854-3p         | 8 |
| <i>circDOCK5</i> | miR-7855-5p         | 1 |
| <i>circDOCK5</i> | miR-7976            | 1 |
| <i>circDOCK5</i> | miR-7978            | 2 |
| <i>circDOCK5</i> | miR-8075            | 1 |
| <i>circDOCK5</i> | miR-873-3p          | 1 |
| <i>circDOCK5</i> | miR-887-5p          | 1 |
| <i>circDOCK5</i> | miR-9-5p            | 2 |
| <i>circDOCK5</i> | miR-92a-1-5p        | 1 |
| <i>circDOCK5</i> | miR-92a-2-5p        | 4 |
| <i>circDOCK5</i> | miR-939-3p          | 1 |
| <i>circDOCK5</i> | miR-943             | 1 |
| <i>circDOCK5</i> | miR-1-3p/206        | 1 |
| <i>circDOCK5</i> | miR-100-3p          | 1 |
| <i>circDOCK5</i> | miR-1183            | 4 |
| <i>circDOCK5</i> | miR-1199-5p/6751-3p | 2 |
| <i>circDOCK5</i> | miR-1200            | 1 |
| <i>circDOCK5</i> | miR-122-3p          | 1 |
| <i>circDOCK5</i> | miR-1224-3p         | 1 |
| <i>circDOCK5</i> | miR-1231            | 3 |
| <i>circDOCK5</i> | miR-1233-5p/6778-5p | 3 |

|                  |                                    |   |
|------------------|------------------------------------|---|
| <i>circDOCK5</i> | miR-1234-3p/7107-5p                | 1 |
| <i>circDOCK5</i> | miR-1238-3p                        | 4 |
| <i>circDOCK5</i> | miR-1245b-3p                       | 1 |
| <i>circDOCK5</i> | miR-1249-3p                        | 1 |
| <i>circDOCK5</i> | miR-1250-3p                        | 1 |
| <i>circDOCK5</i> | miR-1252-3p                        | 2 |
| <i>circDOCK5</i> | miR-1254/3116                      | 1 |
| <i>circDOCK5</i> | miR-1255a/1255b-5p                 | 1 |
| <i>circDOCK5</i> | miR-125a-3p                        | 1 |
| <i>circDOCK5</i> | miR-126-5p                         | 1 |
| <i>circDOCK5</i> | miR-1267                           | 1 |
| <i>circDOCK5</i> | miR-127-5p                         | 1 |
| <i>circDOCK5</i> | miR-1273f                          | 1 |
| <i>circDOCK5</i> | miR-1275/4665-5p                   | 3 |
| <i>circDOCK5</i> | miR-1281                           | 1 |
| <i>circDOCK5</i> | miR-1285-5p                        | 1 |
| <i>circDOCK5</i> | miR-1287-5p                        | 1 |
| <i>circDOCK5</i> | miR-1289                           | 1 |
| <i>circDOCK5</i> | miR-129-5p                         | 4 |
| <i>circDOCK5</i> | miR-1296-5p                        | 3 |
| <i>circDOCK5</i> | miR-1299                           | 1 |
| <i>circDOCK5</i> | miR-130-3p/301-3p/454-3p           | 3 |
| <i>circDOCK5</i> | miR-1305                           | 1 |
| <i>circDOCK5</i> | miR-1307-3p                        | 1 |
| <i>circDOCK5</i> | miR-1323                           | 1 |
| <i>circDOCK5</i> | miR-135a-3p                        | 3 |
| <i>circDOCK5</i> | miR-139-5p                         | 1 |
| <i>circDOCK5</i> | miR-143-3p                         | 1 |
| <i>circDOCK5</i> | miR-143-5p                         | 1 |
| <i>circDOCK5</i> | miR-1468-3p                        | 1 |
| <i>circDOCK5</i> | miR-149-3p/4728-5p/6785-5p/6883-5p | 3 |
| <i>circDOCK5</i> | miR-149-5p                         | 3 |
| <i>circDOCK5</i> | miR-18-5p                          | 1 |
| <i>circDOCK5</i> | miR-1827                           | 2 |
| <i>circDOCK5</i> | miR-185-3p                         | 4 |
| <i>circDOCK5</i> | miR-1909-5p                        | 1 |
| <i>circDOCK5</i> | miR-1911-3p                        | 1 |
| <i>circDOCK5</i> | miR-1915-3p/6764-5p                | 2 |

|                  |                                 |   |
|------------------|---------------------------------|---|
| <i>circDOCK5</i> | miR-193b-5p                     | 2 |
| <i>circDOCK5</i> | miR-194-3p                      | 4 |
| <i>circDOCK5</i> | miR-194-5p                      | 2 |
| <i>circDOCK5</i> | miR-196-5p                      | 1 |
| <i>circDOCK5</i> | miR-1973                        | 1 |
| <i>circDOCK5</i> | miR-1976                        | 2 |
| <i>circDOCK5</i> | miR-205-5p                      | 3 |
| <i>circDOCK5</i> | miR-20b-3p                      | 1 |
| <i>circDOCK5</i> | miR-21-3p/3591-3p               | 2 |
| <i>circDOCK5</i> | miR-21-5p/590-5p                | 1 |
| <i>circDOCK5</i> | miR-2110                        | 3 |
| <i>circDOCK5</i> | miR-2114-3p                     | 2 |
| <i>circDOCK5</i> | miR-217                         | 1 |
| <i>circDOCK5</i> | miR-221-5p/8073                 | 1 |
| <i>circDOCK5</i> | miR-223-5p                      | 1 |
| <i>circDOCK5</i> | miR-2467-3p                     | 2 |
| <i>circDOCK5</i> | miR-27a-5p                      | 3 |
| <i>circDOCK5</i> | miR-296-3p                      | 1 |
| <i>circDOCK5</i> | miR-297                         | 1 |
| <i>circDOCK5</i> | miR-29b-2-5p                    | 1 |
| <i>circDOCK5</i> | miR-301a-5p/301b-5p             | 1 |
| <i>circDOCK5</i> | miR-302-3p/372-3p/373-3p/520-3p | 4 |
| <i>circDOCK5</i> | miR-302c-3p.2/520-3p            | 2 |
| <i>circDOCK5</i> | miR-3120-5p                     | 3 |
| <i>circDOCK5</i> | miR-3135a                       | 2 |
| <i>circDOCK5</i> | miR-3135b                       | 1 |
| <i>circDOCK5</i> | miR-3137                        | 1 |
| <i>circDOCK5</i> | miR-3148                        | 1 |
| <i>circDOCK5</i> | miR-3149                        | 1 |
| <i>circDOCK5</i> | miR-3150a-3p                    | 3 |
| <i>circDOCK5</i> | miR-3157-5p                     | 1 |
| <i>circDOCK5</i> | miR-3158-3p                     | 3 |
| <i>circDOCK5</i> | miR-3165                        | 3 |
| <i>circDOCK5</i> | miR-3170/6855-5p                | 1 |
| <i>circDOCK5</i> | miR-3175                        | 6 |
| <i>circDOCK5</i> | miR-3186-5p                     | 1 |
| <i>circDOCK5</i> | miR-3187-3p                     | 1 |
| <i>circDOCK5</i> | miR-3192-3p                     | 1 |

|                  |                     |   |
|------------------|---------------------|---|
| <i>circDOCK5</i> | miR-3193            | 1 |
| <i>circDOCK5</i> | miR-3198/4309       | 5 |
| <i>circDOCK5</i> | miR-320e            | 1 |
| <i>circDOCK5</i> | miR-328-5p/6885-5p  | 3 |
| <i>circDOCK5</i> | miR-335-5p          | 1 |
| <i>circDOCK5</i> | miR-33a-3p          | 2 |
| <i>circDOCK5</i> | miR-346             | 3 |
| <i>circDOCK5</i> | miR-3529-3p         | 1 |
| <i>circDOCK5</i> | miR-3613-3p         | 1 |
| <i>circDOCK5</i> | miR-3622a-5p        | 3 |
| <i>circDOCK5</i> | miR-3646            | 2 |
| <i>circDOCK5</i> | miR-3648            | 3 |
| <i>circDOCK5</i> | miR-3653-5p         | 2 |
| <i>circDOCK5</i> | miR-367-5p          | 1 |
| <i>circDOCK5</i> | miR-3675-5p         | 4 |
| <i>circDOCK5</i> | miR-3677-5p         | 4 |
| <i>circDOCK5</i> | miR-3682-3p         | 1 |
| <i>circDOCK5</i> | miR-3688-3p         | 2 |
| <i>circDOCK5</i> | miR-3691-3p         | 1 |
| <i>circDOCK5</i> | miR-377-3p          | 1 |
| <i>circDOCK5</i> | miR-378a-5p         | 1 |
| <i>circDOCK5</i> | miR-3921/4653-5p    | 1 |
| <i>circDOCK5</i> | miR-3926            | 1 |
| <i>circDOCK5</i> | miR-3927-3p/6831-5p | 1 |
| <i>circDOCK5</i> | miR-3928-5p/6806-3p | 2 |
| <i>circDOCK5</i> | miR-3934-5p         | 1 |
| <i>circDOCK5</i> | miR-3937            | 3 |
| <i>circDOCK5</i> | miR-3944-5p         | 3 |
| <i>circDOCK5</i> | miR-3978            | 2 |
| <i>circDOCK5</i> | miR-4260            | 3 |
| <i>circDOCK5</i> | miR-4261            | 1 |
| <i>circDOCK5</i> | miR-4264            | 3 |
| <i>circDOCK5</i> | miR-4267            | 1 |
| <i>circDOCK5</i> | miR-4269/6715b-5p   | 1 |
| <i>circDOCK5</i> | miR-4276            | 3 |
| <i>circDOCK5</i> | miR-4286            | 1 |
| <i>circDOCK5</i> | miR-4290            | 1 |
| <i>circDOCK5</i> | miR-4294            | 1 |



|                  |                     |   |
|------------------|---------------------|---|
| <i>circDOCK5</i> | miR-4297/5581-5p    | 3 |
| <i>circDOCK5</i> | miR-4326            | 3 |
| <i>circDOCK5</i> | miR-4327            | 3 |
| <i>circDOCK5</i> | miR-4423-5p         | 1 |
| <i>circDOCK5</i> | miR-4432            | 1 |
| <i>circDOCK5</i> | miR-4433a-3p        | 3 |
| <i>circDOCK5</i> | miR-4433b-3p        | 3 |
| <i>circDOCK5</i> | miR-4435            | 1 |
| <i>circDOCK5</i> | miR-4436b-5p        | 1 |
| <i>circDOCK5</i> | miR-4438            | 2 |
| <i>circDOCK5</i> | miR-4446-3p         | 3 |
| <i>circDOCK5</i> | miR-4457            | 1 |
| <i>circDOCK5</i> | miR-4459            | 3 |
| <i>circDOCK5</i> | miR-4467            | 2 |
| <i>circDOCK5</i> | miR-4476/6876-5p    | 2 |
| <i>circDOCK5</i> | miR-4477a           | 1 |
| <i>circDOCK5</i> | miR-4482-3p         | 1 |
| <i>circDOCK5</i> | miR-4485-5p         | 1 |
| <i>circDOCK5</i> | miR-4496            | 2 |
| <i>circDOCK5</i> | miR-4502            | 1 |
| <i>circDOCK5</i> | miR-4503            | 1 |
| <i>circDOCK5</i> | miR-450a-2-3p       | 3 |
| <i>circDOCK5</i> | miR-450b-3p/769-3p  | 1 |
| <i>circDOCK5</i> | miR-4514/4692       | 1 |
| <i>circDOCK5</i> | miR-451b            | 3 |
| <i>circDOCK5</i> | miR-455-3p.2        | 1 |
| <i>circDOCK5</i> | miR-4633-3p/6500-5p | 1 |
| <i>circDOCK5</i> | miR-4634            | 1 |
| <i>circDOCK5</i> | miR-4638-5p         | 1 |
| <i>circDOCK5</i> | miR-4645-5p/4673    | 1 |
| <i>circDOCK5</i> | miR-4648            | 3 |
| <i>circDOCK5</i> | miR-4652-3p         | 1 |
| <i>circDOCK5</i> | miR-4653-3p         | 3 |
| <i>circDOCK5</i> | miR-4654/4769-5p    | 3 |
| <i>circDOCK5</i> | miR-4655-3p         | 1 |
| <i>circDOCK5</i> | miR-4662-5p         | 1 |
| <i>circDOCK5</i> | miR-4665-3p         | 1 |
| <i>circDOCK5</i> | miR-4691-5p/6792-3p | 1 |

|                  |                                  |   |
|------------------|----------------------------------|---|
| <i>circDOCK5</i> | miR-4700-3p                      | 3 |
| <i>circDOCK5</i> | miR-4708-5p                      | 1 |
| <i>circDOCK5</i> | miR-4714-3p                      | 2 |
| <i>circDOCK5</i> | miR-4722-3p/6727-3p              | 2 |
| <i>circDOCK5</i> | miR-4723-5p/5698/6870-5p/7111-5p | 3 |
| <i>circDOCK5</i> | miR-4726-3p                      | 2 |
| <i>circDOCK5</i> | miR-4734                         | 1 |
| <i>circDOCK5</i> | miR-4735-5p                      | 1 |
| <i>circDOCK5</i> | miR-4738-3p                      | 1 |
| <i>circDOCK5</i> | miR-4742-5p                      | 1 |
| <i>circDOCK5</i> | miR-4743-3p                      | 1 |
| <i>circDOCK5</i> | miR-4750-3p                      | 1 |
| <i>circDOCK5</i> | miR-4754                         | 1 |
| <i>circDOCK5</i> | miR-4755-3p                      | 1 |
| <i>circDOCK5</i> | miR-4761-5p                      | 1 |
| <i>circDOCK5</i> | miR-4762-3p                      | 1 |
| <i>circDOCK5</i> | miR-4768-3p                      | 3 |
| <i>circDOCK5</i> | miR-4775                         | 1 |
| <i>circDOCK5</i> | miR-4778-3p                      | 1 |
| <i>circDOCK5</i> | miR-4778-5p                      | 1 |
| <i>circDOCK5</i> | miR-4782-5p/5706                 | 1 |
| <i>circDOCK5</i> | miR-4795-3p                      | 1 |
| <i>circDOCK5</i> | miR-4796-3p                      | 4 |
| <i>circDOCK5</i> | miR-4797-3p                      | 3 |
| <i>circDOCK5</i> | miR-4802-5p                      | 1 |
| <i>circDOCK5</i> | miR-484/3155                     | 1 |
| <i>circDOCK5</i> | miR-488-3p                       | 1 |
| <i>circDOCK5</i> | miR-490-3p                       | 2 |
| <i>circDOCK5</i> | miR-490-5p                       | 2 |
| <i>circDOCK5</i> | miR-496.2                        | 2 |
| <i>circDOCK5</i> | miR-498                          | 1 |
| <i>circDOCK5</i> | miR-499a-3p/499b-3p              | 1 |
| <i>circDOCK5</i> | miR-5003-3p                      | 1 |
| <i>circDOCK5</i> | miR-500b-3p                      | 1 |
| <i>circDOCK5</i> | miR-5010-5p                      | 3 |
| <i>circDOCK5</i> | miR-505-3p.1                     | 2 |
| <i>circDOCK5</i> | miR-5088-5p                      | 3 |
| <i>circDOCK5</i> | miR-5089-5p                      | 1 |

|                  |                                                                  |   |
|------------------|------------------------------------------------------------------|---|
| <i>circDOCK5</i> | miR-509-3-5p/509-5p/4418                                         | 1 |
| <i>circDOCK5</i> | miR-5093                                                         | 2 |
| <i>circDOCK5</i> | miR-5095/7151-3p                                                 | 2 |
| <i>circDOCK5</i> | miR-5096                                                         | 1 |
| <i>circDOCK5</i> | miR-512-3p                                                       | 2 |
| <i>circDOCK5</i> | miR-512-5p                                                       | 1 |
| <i>circDOCK5</i> | miR-516a-5p                                                      | 1 |
| <i>circDOCK5</i> | miR-516b-5p                                                      | 1 |
| <i>circDOCK5</i> | miR-5189-3p                                                      | 2 |
| <i>circDOCK5</i> | miR-519-3p                                                       | 4 |
| <i>circDOCK5</i> | miR-5191                                                         | 1 |
| <i>circDOCK5</i> | miR-5197-3p                                                      | 1 |
| <i>circDOCK5</i> | miR-543                                                          | 1 |
| <i>circDOCK5</i> | miR-548ac/548bb-3p/548d-3p/548h-3p/548z                          |   |
| <i>circDOCK5</i> | miR-548aj-5p/548f-5p/548g-5p/548x-5p                             | 1 |
| <i>circDOCK5</i> | miR-548aq-3p/548am-3p/548aj-3p/548ah-3p/548ae-3p/548j-3p/548x-3p |   |
| <i>circDOCK5</i> | miR-548az-3p/548ar-3p/548a-3p/548e-3p/548f-3p                    |   |
| <i>circDOCK5</i> | miR-548g-3p                                                      | 1 |
| <i>circDOCK5</i> | miR-548p                                                         | 1 |
| <i>circDOCK5</i> | miR-548s                                                         | 1 |
| <i>circDOCK5</i> | miR-549a                                                         | 1 |
| <i>circDOCK5</i> | miR-550a-3-5p/550a-5p/1271-3p                                    | 1 |
| <i>circDOCK5</i> | miR-552-3p                                                       | 1 |
| <i>circDOCK5</i> | miR-5572                                                         | 3 |
| <i>circDOCK5</i> | miR-5580-5p                                                      | 2 |
| <i>circDOCK5</i> | miR-5582-3p                                                      | 2 |
| <i>circDOCK5</i> | miR-5582-5p                                                      | 3 |
| <i>circDOCK5</i> | miR-5587-5p                                                      | 2 |
| <i>circDOCK5</i> | miR-5681b                                                        | 1 |
| <i>circDOCK5</i> | miR-5687                                                         | 1 |
| <i>circDOCK5</i> | miR-5690                                                         | 1 |
| <i>circDOCK5</i> | miR-5693                                                         | 4 |
| <i>circDOCK5</i> | miR-575/4676-5p                                                  | 1 |
| <i>circDOCK5</i> | miR-584-5p                                                       | 2 |
| <i>circDOCK5</i> | miR-588                                                          | 1 |
| <i>circDOCK5</i> | miR-590-3p                                                       | 1 |
| <i>circDOCK5</i> | miR-604                                                          | 3 |
| <i>circDOCK5</i> | miR-6084                                                         | 1 |

|                  |                             |   |
|------------------|-----------------------------|---|
| <i>circDOCK5</i> | miR-6090                    | 3 |
| <i>circDOCK5</i> | miR-610                     | 1 |
| <i>circDOCK5</i> | miR-6124                    | 1 |
| <i>circDOCK5</i> | miR-6128                    | 1 |
| <i>circDOCK5</i> | miR-617                     | 1 |
| <i>circDOCK5</i> | miR-624-3p                  | 1 |
| <i>circDOCK5</i> | miR-625-5p                  | 3 |
| <i>circDOCK5</i> | miR-629-5p                  | 2 |
| <i>circDOCK5</i> | miR-632/4288                | 3 |
| <i>circDOCK5</i> | miR-647                     | 3 |
| <i>circDOCK5</i> | miR-649                     | 2 |
| <i>circDOCK5</i> | miR-6499-3p                 | 1 |
| <i>circDOCK5</i> | miR-6501-5p                 | 1 |
| <i>circDOCK5</i> | miR-6503-3p                 | 1 |
| <i>circDOCK5</i> | miR-6504-3p                 | 1 |
| <i>circDOCK5</i> | miR-6505-3p                 | 1 |
| <i>circDOCK5</i> | miR-6505-5p                 | 1 |
| <i>circDOCK5</i> | miR-6508-5p/8067            | 2 |
| <i>circDOCK5</i> | miR-6509-3p                 | 1 |
| <i>circDOCK5</i> | miR-651-3p                  | 2 |
| <i>circDOCK5</i> | miR-651-5p                  | 1 |
| <i>circDOCK5</i> | miR-6513-3p                 | 1 |
| <i>circDOCK5</i> | miR-6514-3p                 | 1 |
| <i>circDOCK5</i> | miR-6514-5p                 | 1 |
| <i>circDOCK5</i> | miR-661                     | 1 |
| <i>circDOCK5</i> | miR-663b                    | 3 |
| <i>circDOCK5</i> | miR-664a-5p/4794            | 3 |
| <i>circDOCK5</i> | miR-670-3p                  | 4 |
| <i>circDOCK5</i> | miR-671-5p                  | 2 |
| <i>circDOCK5</i> | miR-6728-5p                 | 1 |
| <i>circDOCK5</i> | miR-6736-3p                 | 1 |
| <i>circDOCK5</i> | miR-6737-5p/6812-5p/6819-5p | 1 |
| <i>circDOCK5</i> | miR-6744-5p                 | 1 |
| <i>circDOCK5</i> | miR-6747-3p                 | 2 |
| <i>circDOCK5</i> | miR-6749-3p                 | 1 |
| <i>circDOCK5</i> | miR-675-3p                  | 1 |
| <i>circDOCK5</i> | miR-6751-5p/6803-5p         | 3 |
| <i>circDOCK5</i> | miR-6762-3p                 | 3 |

|                  |                     |   |
|------------------|---------------------|---|
| <i>circDOCK5</i> | miR-6768-5p         | 1 |
| <i>circDOCK5</i> | miR-6776-3p         | 1 |
| <i>circDOCK5</i> | miR-6777-3p         | 1 |
| <i>circDOCK5</i> | miR-6778-3p         | 3 |
| <i>circDOCK5</i> | miR-6786-3p         | 1 |
| <i>circDOCK5</i> | miR-6787-3p         | 2 |
| <i>circDOCK5</i> | miR-6788-3p         | 1 |
| <i>circDOCK5</i> | miR-6790-3p         | 1 |
| <i>circDOCK5</i> | miR-6791-3p/6829-3p | 3 |
| <i>circDOCK5</i> | miR-6795-5p/6887-5p | 3 |
| <i>circDOCK5</i> | miR-6796-3p         | 3 |
| <i>circDOCK5</i> | miR-6798-3p         | 1 |
| <i>circDOCK5</i> | miR-6799-5p         | 3 |
| <i>circDOCK5</i> | miR-6803-3p         | 1 |
| <i>circDOCK5</i> | miR-6810-5p         | 3 |
| <i>circDOCK5</i> | miR-6812-3p         | 1 |
| <i>circDOCK5</i> | miR-6814-5p         | 1 |
| <i>circDOCK5</i> | miR-6819-3p/6877-3p | 1 |
| <i>circDOCK5</i> | miR-6820-5p         | 2 |
| <i>circDOCK5</i> | miR-6821-3p         | 1 |
| <i>circDOCK5</i> | miR-6823-5p         | 1 |
| <i>circDOCK5</i> | miR-6825-5p         | 6 |
| <i>circDOCK5</i> | miR-6828-5p         | 2 |
| <i>circDOCK5</i> | miR-6836-3p         | 2 |
| <i>circDOCK5</i> | miR-6840-3p         | 2 |
| <i>circDOCK5</i> | miR-6842-3p         | 3 |
| <i>circDOCK5</i> | miR-6850-5p         | 1 |
| <i>circDOCK5</i> | miR-6854-5p         | 3 |
| <i>circDOCK5</i> | miR-6857-5p         | 3 |
| <i>circDOCK5</i> | miR-6858-3p         | 1 |
| <i>circDOCK5</i> | miR-6869-3p         | 3 |
| <i>circDOCK5</i> | miR-6880-5p         | 3 |
| <i>circDOCK5</i> | miR-6888-3p         | 3 |
| <i>circDOCK5</i> | miR-6890-5p         | 4 |
| <i>circDOCK5</i> | miR-6894-3p         | 1 |
| <i>circDOCK5</i> | miR-7106-5p         | 3 |
| <i>circDOCK5</i> | miR-7109-5p         | 3 |
| <i>circDOCK5</i> | miR-7159-3p         | 1 |

|                  |                                       |   |
|------------------|---------------------------------------|---|
| <i>circDOCK5</i> | miR-767-3p                            | 1 |
| <i>circDOCK5</i> | miR-7843-3p                           | 1 |
| <i>circDOCK5</i> | miR-8055                              | 1 |
| <i>circDOCK5</i> | miR-8071                              | 3 |
| <i>circDOCK5</i> | miR-8087                              | 1 |
| <i>circDOCK5</i> | miR-873-5p.1                          | 1 |
| <i>circDOCK5</i> | miR-875-3p                            | 2 |
| <i>circDOCK5</i> | miR-891a-5p                           | 3 |
| <i>circDOCK5</i> | miR-920/4300/5591-5p/6726-5p          | 3 |
| <i>circDOCK5</i> | miR-924                               | 1 |
| <i>circDOCK5</i> | miR-939-5p/1343-5p                    | 6 |
| <i>circDOCK5</i> | miR-99-3p                             | 3 |
| <i>circEDIL3</i> | let-7a-2-3p/let-7g-3p                 | 1 |
| <i>circEDIL3</i> | let-7a-3p/let-7b-3p/let-7f-1-3p/98-3p | 1 |
| <i>circEDIL3</i> | let-7c-3p                             | 1 |
| <i>circEDIL3</i> | let-7f-2-3p/1185-3p                   | 1 |
| <i>circEDIL3</i> | miR-101-3p.1                          | 1 |
| <i>circEDIL3</i> | miR-101-3p.2                          | 2 |
| <i>circEDIL3</i> | miR-1185-5p                           | 1 |
| <i>circEDIL3</i> | miR-1197                              | 1 |
| <i>circEDIL3</i> | miR-1199-5p/6751-3p                   | 1 |
| <i>circEDIL3</i> | miR-1225-3p                           | 1 |
| <i>circEDIL3</i> | miR-1225-5p                           | 1 |
| <i>circEDIL3</i> | miR-1228-3p                           | 1 |
| <i>circEDIL3</i> | miR-1229-5p                           | 1 |
| <i>circEDIL3</i> | miR-124-3p.1                          | 2 |
| <i>circEDIL3</i> | miR-124-5p                            | 1 |
| <i>circEDIL3</i> | miR-1247-3p                           | 1 |
| <i>circEDIL3</i> | miR-1252-3p                           | 1 |
| <i>circEDIL3</i> | miR-1254/3116                         | 1 |
| <i>circEDIL3</i> | miR-1257                              | 1 |
| <i>circEDIL3</i> | miR-1272                              | 1 |
| <i>circEDIL3</i> | miR-1283                              | 1 |
| <i>circEDIL3</i> | miR-1287-5p                           | 1 |
| <i>circEDIL3</i> | miR-1288-5p                           | 1 |
| <i>circEDIL3</i> | miR-1292-5p                           | 1 |
| <i>circEDIL3</i> | miR-1307-3p                           | 1 |
| <i>circEDIL3</i> | miR-130b-5p                           | 1 |

|                  |                                     |   |
|------------------|-------------------------------------|---|
| <i>circEDIL3</i> | miR-1322                            | 1 |
| <i>circEDIL3</i> | miR-136-5p                          | 1 |
| <i>circEDIL3</i> | miR-139-5p                          | 1 |
| <i>circEDIL3</i> | miR-141-3p/200-3p                   | 1 |
| <i>circEDIL3</i> | miR-142-5p                          | 1 |
| <i>circEDIL3</i> | miR-144-3p                          | 1 |
| <i>circEDIL3</i> | miR-146a-3p                         | 1 |
| <i>circEDIL3</i> | miR-155-3p                          | 1 |
| <i>circEDIL3</i> | miR-16-1-3p                         | 1 |
| <i>circEDIL3</i> | miR-17-5p/20-5p/93-5p/106-5p/519-3p | 2 |
| <i>circEDIL3</i> | miR-181-3p/4420                     | 1 |
| <i>circEDIL3</i> | miR-190a-3p                         | 1 |
| <i>circEDIL3</i> | miR-203b-3p                         | 1 |
| <i>circEDIL3</i> | miR-208-3p                          | 1 |
| <i>circEDIL3</i> | miR-211-3p                          | 1 |
| <i>circEDIL3</i> | miR-2114-3p                         | 1 |
| <i>circEDIL3</i> | miR-2115-3p                         | 1 |
| <i>circEDIL3</i> | miR-222-5p                          | 1 |
| <i>circEDIL3</i> | miR-2355-5p                         | 1 |
| <i>circEDIL3</i> | miR-24-5p                           | 1 |
| <i>circEDIL3</i> | miR-25-3p/32-5p/92-3p/363-3p/367-3p | 1 |
| <i>circEDIL3</i> | miR-2682-3p/6781-3p                 | 1 |
| <i>circEDIL3</i> | miR-28-5p/708-5p                    | 1 |
| <i>circEDIL3</i> | miR-302f                            | 1 |
| <i>circEDIL3</i> | miR-3064-5p                         | 1 |
| <i>circEDIL3</i> | miR-3122/3913-5p                    | 1 |
| <i>circEDIL3</i> | miR-3125/3916/6859-5p               | 1 |
| <i>circEDIL3</i> | miR-3134                            | 1 |
| <i>circEDIL3</i> | miR-3135b                           | 1 |
| <i>circEDIL3</i> | miR-3145-5p                         | 1 |
| <i>circEDIL3</i> | miR-3146                            | 1 |
| <i>circEDIL3</i> | miR-3148                            | 1 |
| <i>circEDIL3</i> | miR-3152-5p                         | 1 |
| <i>circEDIL3</i> | miR-3159                            | 1 |
| <i>circEDIL3</i> | miR-3161                            | 1 |
| <i>circEDIL3</i> | miR-3163                            | 2 |
| <i>circEDIL3</i> | miR-3173-3p/6891-5p                 | 1 |
| <i>circEDIL3</i> | miR-3176/3922-3p                    | 1 |

|                  |               |   |
|------------------|---------------|---|
| <i>circEDIL3</i> | miR-3187-3p   | 1 |
| <i>circEDIL3</i> | miR-3190-3p   | 1 |
| <i>circEDIL3</i> | miR-3190-5p   | 1 |
| <i>circEDIL3</i> | miR-320       | 2 |
| <i>circEDIL3</i> | miR-326       | 2 |
| <i>circEDIL3</i> | miR-335-5p    | 1 |
| <i>circEDIL3</i> | miR-338-3p    | 1 |
| <i>circEDIL3</i> | miR-340-5p    | 1 |
| <i>circEDIL3</i> | miR-34b-3p    | 1 |
| <i>circEDIL3</i> | miR-34c-3p    | 1 |
| <i>circEDIL3</i> | miR-3529-3p   | 1 |
| <i>circEDIL3</i> | miR-3605-5p   | 1 |
| <i>circEDIL3</i> | miR-361-3p    | 1 |
| <i>circEDIL3</i> | miR-361-5p    | 1 |
| <i>circEDIL3</i> | miR-3611      | 1 |
| <i>circEDIL3</i> | miR-3614-5p   | 1 |
| <i>circEDIL3</i> | miR-3646      | 1 |
| <i>circEDIL3</i> | miR-365-3p    | 1 |
| <i>circEDIL3</i> | miR-3650      | 1 |
| <i>circEDIL3</i> | miR-3652/4430 | 1 |
| <i>circEDIL3</i> | miR-3662      | 1 |
| <i>circEDIL3</i> | miR-3677-3p   | 1 |
| <i>circEDIL3</i> | miR-3680-3p   | 1 |
| <i>circEDIL3</i> | miR-3688-3p   | 2 |
| <i>circEDIL3</i> | miR-3690      | 1 |
| <i>circEDIL3</i> | miR-3691-3p   | 1 |
| <i>circEDIL3</i> | miR-3714      | 2 |
| <i>circEDIL3</i> | miR-377-3p    | 1 |
| <i>circEDIL3</i> | miR-378-3p    | 2 |
| <i>circEDIL3</i> | miR-381-3p    | 1 |
| <i>circEDIL3</i> | miR-383-5p.2  | 1 |
| <i>circEDIL3</i> | miR-3910      | 2 |
| <i>circEDIL3</i> | miR-3922-5p   | 1 |
| <i>circEDIL3</i> | miR-3924      | 1 |
| <i>circEDIL3</i> | miR-3925-3p   | 1 |
| <i>circEDIL3</i> | miR-3934-3p   | 1 |
| <i>circEDIL3</i> | miR-3942-3p   | 1 |
| <i>circEDIL3</i> | miR-3973      | 2 |



|                  |                  |   |
|------------------|------------------|---|
| <i>circEDIL3</i> | miR-3978         | 2 |
| <i>circEDIL3</i> | miR-409-5p       | 1 |
| <i>circEDIL3</i> | miR-410-3p       | 1 |
| <i>circEDIL3</i> | miR-411-3p       | 1 |
| <i>circEDIL3</i> | miR-421          | 1 |
| <i>circEDIL3</i> | miR-423-3p       | 1 |
| <i>circEDIL3</i> | miR-4254         | 1 |
| <i>circEDIL3</i> | miR-4255         | 1 |
| <i>circEDIL3</i> | miR-4261         | 1 |
| <i>circEDIL3</i> | miR-4264         | 1 |
| <i>circEDIL3</i> | miR-4273/7156-5p | 1 |
| <i>circEDIL3</i> | miR-4282         | 1 |
| <i>circEDIL3</i> | miR-4299         | 1 |
| <i>circEDIL3</i> | miR-4302         | 1 |
| <i>circEDIL3</i> | miR-4303         | 1 |
| <i>circEDIL3</i> | miR-4310/7157-5p | 1 |
| <i>circEDIL3</i> | miR-4314         | 1 |
| <i>circEDIL3</i> | miR-4317         | 1 |
| <i>circEDIL3</i> | miR-4325         | 1 |
| <i>circEDIL3</i> | miR-4424         | 1 |
| <i>circEDIL3</i> | miR-4428         | 1 |
| <i>circEDIL3</i> | miR-4432         | 3 |
| <i>circEDIL3</i> | miR-4435         | 1 |
| <i>circEDIL3</i> | miR-4456         | 1 |
| <i>circEDIL3</i> | miR-4470         | 1 |
| <i>circEDIL3</i> | miR-4471/8059    | 1 |
| <i>circEDIL3</i> | miR-4480         | 1 |
| <i>circEDIL3</i> | miR-4484         | 1 |
| <i>circEDIL3</i> | miR-4495         | 1 |
| <i>circEDIL3</i> | miR-4496         | 2 |
| <i>circEDIL3</i> | miR-450-5p       | 1 |
| <i>circEDIL3</i> | miR-4505/5787    | 1 |
| <i>circEDIL3</i> | miR-450a-1-3p    | 1 |
| <i>circEDIL3</i> | miR-450b-5p      | 1 |
| <i>circEDIL3</i> | miR-4520-3p      | 2 |
| <i>circEDIL3</i> | miR-4522         | 1 |
| <i>circEDIL3</i> | miR-4530         | 1 |
| <i>circEDIL3</i> | miR-4534/8082    | 1 |

|                  |                     |   |
|------------------|---------------------|---|
| <i>circEDIL3</i> | miR-4535            | 1 |
| <i>circEDIL3</i> | miR-4638-3p         | 2 |
| <i>circEDIL3</i> | miR-4638-5p         | 1 |
| <i>circEDIL3</i> | miR-4639-5p         | 1 |
| <i>circEDIL3</i> | miR-4640-3p         | 1 |
| <i>circEDIL3</i> | miR-4666a-3p        | 1 |
| <i>circEDIL3</i> | miR-4668-3p         | 1 |
| <i>circEDIL3</i> | miR-4677-3p         | 1 |
| <i>circEDIL3</i> | miR-4677-5p         | 1 |
| <i>circEDIL3</i> | miR-4679            | 1 |
| <i>circEDIL3</i> | miR-4687-3p         | 1 |
| <i>circEDIL3</i> | miR-4693-3p         | 1 |
| <i>circEDIL3</i> | miR-4698            | 1 |
| <i>circEDIL3</i> | miR-4704-3p         | 1 |
| <i>circEDIL3</i> | miR-4708-3p         | 1 |
| <i>circEDIL3</i> | miR-4712-3p         | 1 |
| <i>circEDIL3</i> | miR-4762-3p         | 1 |
| <i>circEDIL3</i> | miR-4764-3p         | 1 |
| <i>circEDIL3</i> | miR-4774-3p         | 1 |
| <i>circEDIL3</i> | miR-4776-5p         | 1 |
| <i>circEDIL3</i> | miR-4778-3p         | 1 |
| <i>circEDIL3</i> | miR-4786-3p         | 1 |
| <i>circEDIL3</i> | miR-4789-5p         | 1 |
| <i>circEDIL3</i> | miR-4790-3p         | 1 |
| <i>circEDIL3</i> | miR-4797-3p         | 1 |
| <i>circEDIL3</i> | miR-4802-3p         | 1 |
| <i>circEDIL3</i> | miR-483-3p.2        | 1 |
| <i>circEDIL3</i> | miR-487a-5p/487b-5p | 1 |
| <i>circEDIL3</i> | miR-488-3p          | 1 |
| <i>circEDIL3</i> | miR-490-5p          | 1 |
| <i>circEDIL3</i> | miR-492             | 1 |
| <i>circEDIL3</i> | miR-493-5p          | 1 |
| <i>circEDIL3</i> | miR-494-3p          | 1 |
| <i>circEDIL3</i> | miR-496.1           | 1 |
| <i>circEDIL3</i> | miR-499a-5p         | 1 |
| <i>circEDIL3</i> | miR-5000-3p         | 1 |
| <i>circEDIL3</i> | miR-500a-5p         | 1 |
| <i>circEDIL3</i> | miR-503-3p          | 1 |

|                  |                             |   |
|------------------|-----------------------------|---|
| <i>circEDIL3</i> | miR-505-3p.2                | 1 |
| <i>circEDIL3</i> | miR-507/557                 | 1 |
| <i>circEDIL3</i> | miR-508-5p                  | 1 |
| <i>circEDIL3</i> | miR-509-3p                  | 1 |
| <i>circEDIL3</i> | miR-5096                    | 1 |
| <i>circEDIL3</i> | miR-5100                    | 1 |
| <i>circEDIL3</i> | miR-513a-3p/513c-3p/3606-3p | 1 |
| <i>circEDIL3</i> | miR-513b-5p                 | 1 |
| <i>circEDIL3</i> | miR-518a-5p/527             | 1 |
| <i>circEDIL3</i> | miR-518c-5p                 | 2 |
| <i>circEDIL3</i> | miR-520g-3p                 | 2 |
| <i>circEDIL3</i> | miR-524-5p                  | 2 |
| <i>circEDIL3</i> | miR-532-5p                  | 1 |
| <i>circEDIL3</i> | miR-543                     | 1 |
| <i>circEDIL3</i> | miR-545-3p                  | 1 |
| <i>circEDIL3</i> | miR-545-5p                  | 1 |
| <i>circEDIL3</i> | miR-548ah-5p/3609           | 2 |
| <i>circEDIL3</i> | miR-548an                   | 1 |
| <i>circEDIL3</i> | miR-548aw                   | 1 |
| <i>circEDIL3</i> | miR-548e-5p                 | 1 |
| <i>circEDIL3</i> | miR-548q                    | 1 |
| <i>circEDIL3</i> | miR-548s                    | 1 |
| <i>circEDIL3</i> | miR-548u/7161-5p            | 1 |
| <i>circEDIL3</i> | miR-551b-5p                 | 1 |
| <i>circEDIL3</i> | miR-5580-3p                 | 1 |
| <i>circEDIL3</i> | miR-5591-3p                 | 1 |
| <i>circEDIL3</i> | miR-567                     | 1 |
| <i>circEDIL3</i> | miR-5681a                   | 1 |
| <i>circEDIL3</i> | miR-5684                    | 1 |
| <i>circEDIL3</i> | miR-5694                    | 1 |
| <i>circEDIL3</i> | miR-5705                    | 1 |
| <i>circEDIL3</i> | miR-574-3p                  | 1 |
| <i>circEDIL3</i> | miR-578                     | 1 |
| <i>circEDIL3</i> | miR-580-5p                  | 1 |
| <i>circEDIL3</i> | miR-582-5p                  | 2 |
| <i>circEDIL3</i> | miR-588                     | 1 |
| <i>circEDIL3</i> | miR-589-3p                  | 1 |
| <i>circEDIL3</i> | miR-600                     | 1 |

|                  |                     |   |
|------------------|---------------------|---|
| <i>circEDIL3</i> | miR-605-5p          | 1 |
| <i>circEDIL3</i> | miR-6079            | 1 |
| <i>circEDIL3</i> | miR-6124            | 1 |
| <i>circEDIL3</i> | miR-618             | 1 |
| <i>circEDIL3</i> | miR-635/6774-5p     | 2 |
| <i>circEDIL3</i> | miR-641/3617-5p     | 1 |
| <i>circEDIL3</i> | miR-647             | 1 |
| <i>circEDIL3</i> | miR-6500-3p         | 1 |
| <i>circEDIL3</i> | miR-651-3p          | 2 |
| <i>circEDIL3</i> | miR-6513-5p         | 1 |
| <i>circEDIL3</i> | miR-6514-3p         | 1 |
| <i>circEDIL3</i> | miR-653-3p          | 1 |
| <i>circEDIL3</i> | miR-659-5p          | 1 |
| <i>circEDIL3</i> | miR-661             | 1 |
| <i>circEDIL3</i> | miR-671-5p          | 1 |
| <i>circEDIL3</i> | miR-6720-5p         | 1 |
| <i>circEDIL3</i> | miR-6730-5p         | 1 |
| <i>circEDIL3</i> | miR-6733-3p         | 1 |
| <i>circEDIL3</i> | miR-6739-3p         | 1 |
| <i>circEDIL3</i> | miR-676-5p          | 1 |
| <i>circEDIL3</i> | miR-6764-3p/6824-3p | 2 |
| <i>circEDIL3</i> | miR-6768-3p         | 1 |
| <i>circEDIL3</i> | miR-6776-5p         | 1 |
| <i>circEDIL3</i> | miR-6778-3p         | 1 |
| <i>circEDIL3</i> | miR-6790-3p         | 1 |
| <i>circEDIL3</i> | miR-6791-3p/6829-3p | 1 |
| <i>circEDIL3</i> | miR-6793-3p         | 1 |
| <i>circEDIL3</i> | miR-6796-3p         | 2 |
| <i>circEDIL3</i> | miR-6800-3p         | 1 |
| <i>circEDIL3</i> | miR-6807-5p         | 1 |
| <i>circEDIL3</i> | miR-6814-5p         | 2 |
| <i>circEDIL3</i> | miR-6819-3p/6877-3p | 1 |
| <i>circEDIL3</i> | miR-6821-3p         | 1 |
| <i>circEDIL3</i> | miR-6827-5p         | 1 |
| <i>circEDIL3</i> | miR-6828-5p         | 1 |
| <i>circEDIL3</i> | miR-6830-5p         | 2 |
| <i>circEDIL3</i> | miR-6836-3p         | 1 |
| <i>circEDIL3</i> | miR-6842-3p         | 1 |

|                  |                     |   |
|------------------|---------------------|---|
| <i>circEDIL3</i> | miR-6854-5p         | 1 |
| <i>circEDIL3</i> | miR-6861-3p         | 1 |
| <i>circEDIL3</i> | miR-6861-5p         | 1 |
| <i>circEDIL3</i> | miR-6890-3p         | 1 |
| <i>circEDIL3</i> | miR-6894-3p         | 1 |
| <i>circEDIL3</i> | miR-7158-3p         | 1 |
| <i>circEDIL3</i> | miR-7158-5p         | 1 |
| <i>circEDIL3</i> | miR-7159-5p         | 1 |
| <i>circEDIL3</i> | miR-759             | 1 |
| <i>circEDIL3</i> | miR-766-3p          | 1 |
| <i>circEDIL3</i> | miR-7703            | 1 |
| <i>circEDIL3</i> | miR-7974            | 1 |
| <i>circEDIL3</i> | miR-7978            | 1 |
| <i>circEDIL3</i> | miR-802             | 1 |
| <i>circEDIL3</i> | miR-8063            | 1 |
| <i>circEDIL3</i> | miR-8068            | 1 |
| <i>circEDIL3</i> | miR-8070            | 1 |
| <i>circEDIL3</i> | miR-8087            | 3 |
| <i>circEDIL3</i> | miR-887-5p          | 1 |
| <i>circEDIL3</i> | miR-890             | 2 |
| <i>circEDIL3</i> | miR-99-3p           | 2 |
| <i>circEGLN3</i> | miR-103b            | 2 |
| <i>circEGLN3</i> | miR-1184            | 1 |
| <i>circEGLN3</i> | miR-1200            | 1 |
| <i>circEGLN3</i> | miR-1202/3972       | 1 |
| <i>circEGLN3</i> | miR-1205            | 1 |
| <i>circEGLN3</i> | miR-1206            | 1 |
| <i>circEGLN3</i> | miR-1231            | 1 |
| <i>circEGLN3</i> | miR-1233-3p         | 2 |
| <i>circEGLN3</i> | miR-1233-5p/6778-5p | 2 |
| <i>circEGLN3</i> | miR-1236-3p         | 1 |
| <i>circEGLN3</i> | miR-124-5p          | 1 |
| <i>circEGLN3</i> | miR-1245b-3p        | 3 |
| <i>circEGLN3</i> | miR-1250-3p         | 3 |
| <i>circEGLN3</i> | miR-1252-5p         | 1 |
| <i>circEGLN3</i> | miR-1263            | 2 |
| <i>circEGLN3</i> | miR-1266-3p         | 2 |
| <i>circEGLN3</i> | miR-1273d           | 2 |

|                  |                          |   |
|------------------|--------------------------|---|
| <i>circEGLN3</i> | miR-1273h-3p             | 1 |
| <i>circEGLN3</i> | miR-1288-5p              | 2 |
| <i>circEGLN3</i> | miR-129-3p               | 1 |
| <i>circEGLN3</i> | miR-129-5p               | 2 |
| <i>circEGLN3</i> | miR-1298-5p              | 2 |
| <i>circEGLN3</i> | miR-130-3p/301-3p/454-3p | 1 |
| <i>circEGLN3</i> | miR-1301-3p              | 1 |
| <i>circEGLN3</i> | miR-1304-3p              | 1 |
| <i>circEGLN3</i> | miR-1307-3p              | 1 |
| <i>circEGLN3</i> | miR-130b-5p              | 1 |
| <i>circEGLN3</i> | miR-1324                 | 1 |
| <i>circEGLN3</i> | miR-145-3p               | 2 |
| <i>circEGLN3</i> | miR-147a                 | 2 |
| <i>circEGLN3</i> | miR-150-3p               | 2 |
| <i>circEGLN3</i> | miR-153-5p               | 1 |
| <i>circEGLN3</i> | miR-1539                 | 2 |
| <i>circEGLN3</i> | miR-154-5p               | 1 |
| <i>circEGLN3</i> | miR-155-3p               | 1 |
| <i>circEGLN3</i> | miR-17-3p                | 1 |
| <i>circEGLN3</i> | miR-181-3p/4420          | 1 |
| <i>circEGLN3</i> | miR-183-3p               | 1 |
| <i>circEGLN3</i> | miR-186-5p               | 1 |
| <i>circEGLN3</i> | miR-188-5p               | 1 |
| <i>circEGLN3</i> | miR-18a-3p               | 1 |
| <i>circEGLN3</i> | miR-1911-3p              | 1 |
| <i>circEGLN3</i> | miR-192-3p               | 1 |
| <i>circEGLN3</i> | miR-1973                 | 1 |
| <i>circEGLN3</i> | miR-1976                 | 2 |
| <i>circEGLN3</i> | miR-203a-3p.1            | 1 |
| <i>circEGLN3</i> | miR-205-5p               | 1 |
| <i>circEGLN3</i> | miR-20a-3p               | 2 |
| <i>circEGLN3</i> | miR-2116-5p              | 2 |
| <i>circEGLN3</i> | miR-216a-5p              | 1 |
| <i>circEGLN3</i> | miR-216b-5p              | 1 |
| <i>circEGLN3</i> | miR-22-5p                | 2 |
| <i>circEGLN3</i> | miR-2276-5p              | 1 |
| <i>circEGLN3</i> | miR-23-3p                | 1 |
| <i>circEGLN3</i> | miR-23-5p                | 1 |

|                  |                                 |   |
|------------------|---------------------------------|---|
| <i>circEGLN3</i> | miR-2682-3p/6781-3p             | 1 |
| <i>circEGLN3</i> | miR-26b-3p                      | 2 |
| <i>circEGLN3</i> | miR-298                         | 1 |
| <i>circEGLN3</i> | miR-299-3p                      | 2 |
| <i>circEGLN3</i> | miR-299-5p                      | 1 |
| <i>circEGLN3</i> | miR-29b-1-5p                    | 3 |
| <i>circEGLN3</i> | miR-301a-5p/301b-5p             | 1 |
| <i>circEGLN3</i> | miR-302-3p/372-3p/373-3p/520-3p | 1 |
| <i>circEGLN3</i> | miR-302a-5p                     | 1 |
| <i>circEGLN3</i> | miR-3064-3p                     | 2 |
| <i>circEGLN3</i> | miR-3065-5p                     | 1 |
| <i>circEGLN3</i> | miR-3074-5p                     | 2 |
| <i>circEGLN3</i> | miR-31-3p                       | 1 |
| <i>circEGLN3</i> | miR-3120-5p                     | 2 |
| <i>circEGLN3</i> | miR-3133                        | 1 |
| <i>circEGLN3</i> | miR-3136-5p/4439                | 1 |
| <i>circEGLN3</i> | miR-3138                        | 1 |
| <i>circEGLN3</i> | miR-3140-5p                     | 1 |
| <i>circEGLN3</i> | miR-3145-3p                     | 2 |
| <i>circEGLN3</i> | miR-3145-5p                     | 1 |
| <i>circEGLN3</i> | miR-3146                        | 1 |
| <i>circEGLN3</i> | miR-3148                        | 1 |
| <i>circEGLN3</i> | miR-3153/6733-5p/6739-5p        | 3 |
| <i>circEGLN3</i> | miR-3157-3p                     | 1 |
| <i>circEGLN3</i> | miR-3158-5p                     | 1 |
| <i>circEGLN3</i> | miR-3166                        | 1 |
| <i>circEGLN3</i> | miR-3176/3922-3p                | 1 |
| <i>circEGLN3</i> | miR-3180-5p                     | 2 |
| <i>circEGLN3</i> | miR-3182                        | 2 |
| <i>circEGLN3</i> | miR-3185                        | 1 |
| <i>circEGLN3</i> | miR-3190-5p                     | 1 |
| <i>circEGLN3</i> | miR-3193                        | 3 |
| <i>circEGLN3</i> | miR-3194-3p                     | 1 |
| <i>circEGLN3</i> | miR-3194-5p                     | 1 |
| <i>circEGLN3</i> | miR-3200-5p                     | 1 |
| <i>circEGLN3</i> | miR-3201/4791                   | 2 |
| <i>circEGLN3</i> | miR-324-3p/1913                 | 1 |
| <i>circEGLN3</i> | miR-324-5p                      | 1 |

|                  |                           |   |
|------------------|---------------------------|---|
| <i>circEGLN3</i> | miR-339-5p                | 1 |
| <i>circEGLN3</i> | miR-345-3p                | 1 |
| <i>circEGLN3</i> | miR-3529-3p               | 1 |
| <i>circEGLN3</i> | miR-3613-3p               | 1 |
| <i>circEGLN3</i> | miR-362-5p/500b-5p        | 1 |
| <i>circEGLN3</i> | miR-3622a-3p/3622b-3p     | 1 |
| <i>circEGLN3</i> | miR-3653-5p               | 2 |
| <i>circEGLN3</i> | miR-3663-5p               | 2 |
| <i>circEGLN3</i> | miR-3678-3p               | 1 |
| <i>circEGLN3</i> | miR-3682-5p               | 2 |
| <i>circEGLN3</i> | miR-3688-3p               | 1 |
| <i>circEGLN3</i> | miR-3692-5p               | 1 |
| <i>circEGLN3</i> | miR-370-3p                | 1 |
| <i>circEGLN3</i> | miR-376-3p                | 2 |
| <i>circEGLN3</i> | miR-376a-2-5p             | 1 |
| <i>circEGLN3</i> | miR-376a-5p               | 1 |
| <i>circEGLN3</i> | miR-378a-5p               | 1 |
| <i>circEGLN3</i> | miR-382-3p                | 2 |
| <i>circEGLN3</i> | miR-3911                  | 1 |
| <i>circEGLN3</i> | miR-3913-3p               | 1 |
| <i>circEGLN3</i> | miR-3914                  | 2 |
| <i>circEGLN3</i> | miR-3921/4653-5p          | 1 |
| <i>circEGLN3</i> | miR-3925-3p               | 1 |
| <i>circEGLN3</i> | miR-3942-3p               | 1 |
| <i>circEGLN3</i> | miR-3944-5p               | 1 |
| <i>circEGLN3</i> | miR-412-3p/6754-3p        | 1 |
| <i>circEGLN3</i> | miR-423-5p                | 2 |
| <i>circEGLN3</i> | miR-4257                  | 2 |
| <i>circEGLN3</i> | miR-4269/6715b-5p         | 1 |
| <i>circEGLN3</i> | miR-4271/4725-3p/6780b-5p | 2 |
| <i>circEGLN3</i> | miR-4273/7156-5p          | 2 |
| <i>circEGLN3</i> | miR-4276                  | 1 |
| <i>circEGLN3</i> | miR-4287/4685-3p          | 1 |
| <i>circEGLN3</i> | miR-4290                  | 2 |
| <i>circEGLN3</i> | miR-4307                  | 1 |
| <i>circEGLN3</i> | miR-431-5p                | 1 |
| <i>circEGLN3</i> | miR-4312                  | 1 |
| <i>circEGLN3</i> | miR-4318                  | 1 |



|                  |                                              |   |
|------------------|----------------------------------------------|---|
| <i>circEGLN3</i> | miR-4326                                     | 1 |
| <i>circEGLN3</i> | miR-4327                                     | 1 |
| <i>circEGLN3</i> | miR-433-5p                                   | 1 |
| <i>circEGLN3</i> | miR-4421/5699-3p                             | 1 |
| <i>circEGLN3</i> | miR-4426/4647/4662b                          | 1 |
| <i>circEGLN3</i> | miR-4427                                     | 2 |
| <i>circEGLN3</i> | miR-4432                                     | 2 |
| <i>circEGLN3</i> | miR-4436b-3p/4632-5p/6735-5p/6879-5p/7843-5p |   |
| <i>circEGLN3</i> | miR-4452                                     | 1 |
| <i>circEGLN3</i> | miR-4463                                     | 2 |
| <i>circEGLN3</i> | miR-4469                                     | 1 |
| <i>circEGLN3</i> | miR-4480                                     | 1 |
| <i>circEGLN3</i> | miR-4490                                     | 1 |
| <i>circEGLN3</i> | miR-4491/4657                                | 2 |
| <i>circEGLN3</i> | miR-4494                                     | 2 |
| <i>circEGLN3</i> | miR-4496                                     | 1 |
| <i>circEGLN3</i> | miR-4497                                     | 1 |
| <i>circEGLN3</i> | miR-4499                                     | 2 |
| <i>circEGLN3</i> | miR-4504                                     | 1 |
| <i>circEGLN3</i> | miR-450b-3p/769-3p                           | 2 |
| <i>circEGLN3</i> | miR-4513/6855-3p                             | 1 |
| <i>circEGLN3</i> | miR-4514/4692                                | 1 |
| <i>circEGLN3</i> | miR-4520-3p                                  | 1 |
| <i>circEGLN3</i> | miR-4524-5p                                  | 2 |
| <i>circEGLN3</i> | miR-4536-5p                                  | 1 |
| <i>circEGLN3</i> | miR-4539                                     | 1 |
| <i>circEGLN3</i> | miR-4638-5p                                  | 1 |
| <i>circEGLN3</i> | miR-4639-5p                                  | 1 |
| <i>circEGLN3</i> | miR-4641                                     | 2 |
| <i>circEGLN3</i> | miR-4645-5p/4673                             | 1 |
| <i>circEGLN3</i> | miR-4648                                     | 2 |
| <i>circEGLN3</i> | miR-4654/4769-5p                             | 2 |
| <i>circEGLN3</i> | miR-4659a-3p/4659b-3p                        | 2 |
| <i>circEGLN3</i> | miR-466                                      | 2 |
| <i>circEGLN3</i> | miR-4665-3p                                  | 1 |
| <i>circEGLN3</i> | miR-4666a-5p                                 | 2 |
| <i>circEGLN3</i> | miR-4668-5p                                  | 3 |
| <i>circEGLN3</i> | miR-4670-3p                                  | 1 |

|                  |                     |   |
|------------------|---------------------|---|
| <i>circEGLN3</i> | miR-4677-5p         | 2 |
| <i>circEGLN3</i> | miR-4680-3p         | 2 |
| <i>circEGLN3</i> | miR-4686            | 2 |
| <i>circEGLN3</i> | miR-4687-5p         | 1 |
| <i>circEGLN3</i> | miR-4690-3p/5685    | 1 |
| <i>circEGLN3</i> | miR-4694-3p         | 1 |
| <i>circEGLN3</i> | miR-4709-3p         | 2 |
| <i>circEGLN3</i> | miR-4711-5p         | 1 |
| <i>circEGLN3</i> | miR-4713-3p         | 2 |
| <i>circEGLN3</i> | miR-4713-5p         | 1 |
| <i>circEGLN3</i> | miR-4724-5p         | 2 |
| <i>circEGLN3</i> | miR-4727-5p         | 1 |
| <i>circEGLN3</i> | miR-4728-3p         | 1 |
| <i>circEGLN3</i> | miR-4734            | 2 |
| <i>circEGLN3</i> | miR-4738-5p         | 1 |
| <i>circEGLN3</i> | miR-4742-5p         | 1 |
| <i>circEGLN3</i> | miR-4750-3p         | 1 |
| <i>circEGLN3</i> | miR-4752            | 2 |
| <i>circEGLN3</i> | miR-4753-3p         | 2 |
| <i>circEGLN3</i> | miR-4754            | 2 |
| <i>circEGLN3</i> | miR-4757-5p/6744-3p | 1 |
| <i>circEGLN3</i> | miR-4760-3p         | 1 |
| <i>circEGLN3</i> | miR-4761-3p         | 1 |
| <i>circEGLN3</i> | miR-4764-3p         | 1 |
| <i>circEGLN3</i> | miR-4766-5p         | 1 |
| <i>circEGLN3</i> | miR-4768-5p/6833-3p | 1 |
| <i>circEGLN3</i> | miR-4771            | 1 |
| <i>circEGLN3</i> | miR-4774-5p         | 1 |
| <i>circEGLN3</i> | miR-4776-3p         | 2 |
| <i>circEGLN3</i> | miR-4778-3p         | 1 |
| <i>circEGLN3</i> | miR-4786-3p         | 1 |
| <i>circEGLN3</i> | miR-4793-5p         | 2 |
| <i>circEGLN3</i> | miR-4795-5p         | 1 |
| <i>circEGLN3</i> | miR-4800-5p         | 1 |
| <i>circEGLN3</i> | miR-4802-3p         | 2 |
| <i>circEGLN3</i> | miR-483-3p.1        | 2 |
| <i>circEGLN3</i> | miR-487-3p          | 2 |
| <i>circEGLN3</i> | miR-488-5p          | 1 |

|                  |                                               |   |
|------------------|-----------------------------------------------|---|
| <i>circEGLN3</i> | miR-499b-5p                                   | 2 |
| <i>circEGLN3</i> | miR-5001-3p                                   | 1 |
| <i>circEGLN3</i> | miR-5006-5p                                   | 1 |
| <i>circEGLN3</i> | miR-5007-3p                                   | 1 |
| <i>circEGLN3</i> | miR-501-5p                                    | 1 |
| <i>circEGLN3</i> | miR-505-5p                                    | 2 |
| <i>circEGLN3</i> | miR-506-5p                                    | 1 |
| <i>circEGLN3</i> | miR-508-5p                                    | 1 |
| <i>circEGLN3</i> | miR-5089-3p                                   | 1 |
| <i>circEGLN3</i> | miR-5089-5p                                   | 2 |
| <i>circEGLN3</i> | miR-5093                                      | 3 |
| <i>circEGLN3</i> | miR-5100                                      | 3 |
| <i>circEGLN3</i> | miR-511-5p                                    | 1 |
| <i>circEGLN3</i> | miR-514a-3p                                   | 2 |
| <i>circEGLN3</i> | miR-5187-3p                                   | 2 |
| <i>circEGLN3</i> | miR-519-3p                                    | 1 |
| <i>circEGLN3</i> | miR-5190                                      | 1 |
| <i>circEGLN3</i> | miR-5194                                      | 2 |
| <i>circEGLN3</i> | miR-5196-3p                                   | 2 |
| <i>circEGLN3</i> | miR-522-3p                                    | 1 |
| <i>circEGLN3</i> | miR-525-5p                                    | 3 |
| <i>circEGLN3</i> | miR-542-3p                                    | 1 |
| <i>circEGLN3</i> | miR-548av-3p                                  | 1 |
| <i>circEGLN3</i> | miR-548az-3p/548ar-3p/548a-3p/548e-3p/548f-3p | 1 |
| <i>circEGLN3</i> | miR-548g-3p                                   | 1 |
| <i>circEGLN3</i> | miR-549a                                      | 2 |
| <i>circEGLN3</i> | miR-551b-5p                                   | 2 |
| <i>circEGLN3</i> | miR-552-3p                                    | 1 |
| <i>circEGLN3</i> | miR-552-5p                                    | 1 |
| <i>circEGLN3</i> | miR-5571-5p                                   | 2 |
| <i>circEGLN3</i> | miR-5580-5p                                   | 1 |
| <i>circEGLN3</i> | miR-5582-3p                                   | 1 |
| <i>circEGLN3</i> | miR-5587-5p                                   | 2 |
| <i>circEGLN3</i> | miR-5680                                      | 2 |
| <i>circEGLN3</i> | miR-5681a                                     | 1 |
| <i>circEGLN3</i> | miR-5691                                      | 1 |
| <i>circEGLN3</i> | miR-5696                                      | 1 |
| <i>circEGLN3</i> | miR-570-3p                                    | 1 |

|                  |                       |   |
|------------------|-----------------------|---|
| <i>circEGLN3</i> | miR-573/3616-5p       | 1 |
| <i>circEGLN3</i> | miR-576-3p            | 2 |
| <i>circEGLN3</i> | miR-578               | 2 |
| <i>circEGLN3</i> | miR-579-3p            | 1 |
| <i>circEGLN3</i> | miR-581               | 1 |
| <i>circEGLN3</i> | miR-592               | 1 |
| <i>circEGLN3</i> | miR-598-5p            | 1 |
| <i>circEGLN3</i> | miR-599               | 1 |
| <i>circEGLN3</i> | miR-606               | 1 |
| <i>circEGLN3</i> | miR-6070              | 1 |
| <i>circEGLN3</i> | miR-6071              | 1 |
| <i>circEGLN3</i> | miR-6124              | 1 |
| <i>circEGLN3</i> | miR-628-5p            | 1 |
| <i>circEGLN3</i> | miR-632/4288          | 1 |
| <i>circEGLN3</i> | miR-638               | 2 |
| <i>circEGLN3</i> | miR-639               | 1 |
| <i>circEGLN3</i> | miR-644a              | 1 |
| <i>circEGLN3</i> | miR-651-3p            | 1 |
| <i>circEGLN3</i> | miR-6515-3p           | 1 |
| <i>circEGLN3</i> | miR-6516-3p           | 1 |
| <i>circEGLN3</i> | miR-652-5p            | 1 |
| <i>circEGLN3</i> | miR-653-3p            | 1 |
| <i>circEGLN3</i> | miR-654-5p            | 2 |
| <i>circEGLN3</i> | miR-664a-3p           | 3 |
| <i>circEGLN3</i> | miR-670-5p            | 2 |
| <i>circEGLN3</i> | miR-6721-5p           | 1 |
| <i>circEGLN3</i> | miR-6728-5p           | 2 |
| <i>circEGLN3</i> | miR-6729-3p           | 1 |
| <i>circEGLN3</i> | miR-6730-5p           | 1 |
| <i>circEGLN3</i> | miR-6739-3p           | 1 |
| <i>circEGLN3</i> | miR-6748-3p           | 1 |
| <i>circEGLN3</i> | miR-6752-3p           | 1 |
| <i>circEGLN3</i> | miR-6753-5p           | 1 |
| <i>circEGLN3</i> | miR-676-5p            | 2 |
| <i>circEGLN3</i> | miR-6765-3p           | 1 |
| <i>circEGLN3</i> | miR-6767-3p           | 1 |
| <i>circEGLN3</i> | miR-6769a-5p/6769b-5p | 2 |
| <i>circEGLN3</i> | miR-6779-3p           | 1 |

|                  |             |   |
|------------------|-------------|---|
| <i>circEGLN3</i> | miR-6783-5p | 2 |
| <i>circEGLN3</i> | miR-6788-3p | 1 |
| <i>circEGLN3</i> | miR-6793-3p | 1 |
| <i>circEGLN3</i> | miR-6801-5p | 2 |
| <i>circEGLN3</i> | miR-6809-3p | 1 |
| <i>circEGLN3</i> | miR-6817-3p | 1 |
| <i>circEGLN3</i> | miR-6818-5p | 2 |
| <i>circEGLN3</i> | miR-6828-3p | 1 |
| <i>circEGLN3</i> | miR-6833-5p | 2 |
| <i>circEGLN3</i> | miR-6837-3p | 1 |
| <i>circEGLN3</i> | miR-6844    | 2 |
| <i>circEGLN3</i> | miR-6847-5p | 2 |
| <i>circEGLN3</i> | miR-6850-5p | 2 |
| <i>circEGLN3</i> | miR-6853-3p | 1 |
| <i>circEGLN3</i> | miR-6857-3p | 1 |
| <i>circEGLN3</i> | miR-6867-3p | 1 |
| <i>circEGLN3</i> | miR-6867-5p | 1 |
| <i>circEGLN3</i> | miR-6868-3p | 1 |
| <i>circEGLN3</i> | miR-6873-5p | 2 |
| <i>circEGLN3</i> | miR-6874-5p | 2 |
| <i>circEGLN3</i> | miR-6875-3p | 2 |
| <i>circEGLN3</i> | miR-6878-3p | 2 |
| <i>circEGLN3</i> | miR-6892-3p | 1 |
| <i>circEGLN3</i> | miR-7-3p    | 1 |
| <i>circEGLN3</i> | miR-7110-3p | 1 |
| <i>circEGLN3</i> | miR-7112-3p | 1 |
| <i>circEGLN3</i> | miR-7113-3p | 1 |
| <i>circEGLN3</i> | miR-7152-3p | 2 |
| <i>circEGLN3</i> | miR-7152-5p | 2 |
| <i>circEGLN3</i> | miR-7156-3p | 1 |
| <i>circEGLN3</i> | miR-764     | 1 |
| <i>circEGLN3</i> | miR-7641    | 1 |
| <i>circEGLN3</i> | miR-766-3p  | 1 |
| <i>circEGLN3</i> | miR-7847-3p | 2 |
| <i>circEGLN3</i> | miR-8055    | 1 |
| <i>circEGLN3</i> | miR-8065    | 2 |
| <i>circEGLN3</i> | miR-8069    | 1 |
| <i>circEGLN3</i> | miR-8087    | 2 |

|                   |                                 |   |
|-------------------|---------------------------------|---|
| <i>circEGLN3</i>  | miR-873-5p.1                    | 1 |
| <i>circEGLN3</i>  | miR-874-3p                      | 1 |
| <i>circEGLN3</i>  | miR-875-3p                      | 3 |
| <i>circEGLN3</i>  | miR-888-3p                      | 1 |
| <i>circEGLN3</i>  | miR-892-5p                      | 1 |
| <i>circEGLN3</i>  | miR-892a                        | 1 |
| <i>circEGLN3</i>  | miR-892b                        | 1 |
| <i>circEGLN3</i>  | miR-92a-2-5p                    | 2 |
| <i>circEGLN3</i>  | miR-93-3p                       | 1 |
| <i>circEGLN3</i>  | miR-942-3p                      | 1 |
| <i>circEGLN3</i>  | miR-942-5p                      | 1 |
| <i>circEGLN3</i>  | miR-943                         | 1 |
| <i>circELMOD3</i> | miR-1184                        | 1 |
| <i>circELMOD3</i> | miR-1199-5p/6751-3p             | 4 |
| <i>circELMOD3</i> | miR-1205                        | 1 |
| <i>circELMOD3</i> | miR-1252-5p                     | 1 |
| <i>circELMOD3</i> | miR-128-3p                      | 3 |
| <i>circELMOD3</i> | miR-1284                        | 1 |
| <i>circELMOD3</i> | miR-1287-5p                     | 5 |
| <i>circELMOD3</i> | miR-1299                        | 4 |
| <i>circELMOD3</i> | miR-1304-3p                     | 1 |
| <i>circELMOD3</i> | miR-1306-5p                     | 2 |
| <i>circELMOD3</i> | miR-139-3p                      | 1 |
| <i>circELMOD3</i> | miR-140-3p.1                    | 5 |
| <i>circELMOD3</i> | miR-149-5p                      | 3 |
| <i>circELMOD3</i> | miR-1587/3620-5p                | 4 |
| <i>circELMOD3</i> | miR-17-3p                       | 1 |
| <i>circELMOD3</i> | miR-181-3p/4420                 | 1 |
| <i>circELMOD3</i> | miR-18a-3p                      | 4 |
| <i>circELMOD3</i> | miR-1909-3p/6722-3p             | 1 |
| <i>circELMOD3</i> | miR-1911-3p                     | 3 |
| <i>circELMOD3</i> | miR-1915-3p/6764-5p             | 3 |
| <i>circELMOD3</i> | miR-2115-5p                     | 2 |
| <i>circELMOD3</i> | miR-22-3p                       | 1 |
| <i>circELMOD3</i> | miR-2392                        | 1 |
| <i>circELMOD3</i> | miR-2861                        | 1 |
| <i>circELMOD3</i> | miR-301a-5p/301b-5p             | 3 |
| <i>circELMOD3</i> | miR-302-3p/372-3p/373-3p/520-3p | 1 |

|                   |                           |   |
|-------------------|---------------------------|---|
| <i>circELMOD3</i> | miR-302c-3p.2/520-3p      | 1 |
| <i>circELMOD3</i> | miR-3120-5p               | 1 |
| <i>circELMOD3</i> | miR-3135b                 | 5 |
| <i>circELMOD3</i> | miR-3153/6733-5p/6739-5p  | 1 |
| <i>circELMOD3</i> | miR-3158-5p               | 1 |
| <i>circELMOD3</i> | miR-3173-3p/6891-5p       | 1 |
| <i>circELMOD3</i> | miR-3179                  | 3 |
| <i>circELMOD3</i> | miR-3191-5p               | 2 |
| <i>circELMOD3</i> | miR-3194-3p               | 3 |
| <i>circELMOD3</i> | miR-324-3p/1913           | 4 |
| <i>circELMOD3</i> | miR-326                   | 1 |
| <i>circELMOD3</i> | miR-339-5p                | 3 |
| <i>circELMOD3</i> | miR-342-3p                | 5 |
| <i>circELMOD3</i> | miR-3614-5p               | 1 |
| <i>circELMOD3</i> | miR-3652/4430             | 5 |
| <i>circELMOD3</i> | miR-3657                  | 2 |
| <i>circELMOD3</i> | miR-3680-5p               | 3 |
| <i>circELMOD3</i> | miR-3686                  | 1 |
| <i>circELMOD3</i> | miR-377-3p                | 3 |
| <i>circELMOD3</i> | miR-378j/6839-5p          | 5 |
| <i>circELMOD3</i> | miR-3912-5p               | 2 |
| <i>circELMOD3</i> | miR-3918                  | 1 |
| <i>circELMOD3</i> | miR-3921/4653-5p          | 3 |
| <i>circELMOD3</i> | miR-3929/4419b/4478       | 1 |
| <i>circELMOD3</i> | miR-3936                  | 1 |
| <i>circELMOD3</i> | miR-3974                  | 1 |
| <i>circELMOD3</i> | miR-4256                  | 2 |
| <i>circELMOD3</i> | miR-4271/4725-3p/6780b-5p | 1 |
| <i>circELMOD3</i> | miR-4287/4685-3p          | 1 |
| <i>circELMOD3</i> | miR-4303                  | 1 |
| <i>circELMOD3</i> | miR-432-3p                | 1 |
| <i>circELMOD3</i> | miR-4421/5699-3p          | 1 |
| <i>circELMOD3</i> | miR-4428                  | 1 |
| <i>circELMOD3</i> | miR-4437                  | 4 |
| <i>circELMOD3</i> | miR-4453/4538             | 1 |
| <i>circELMOD3</i> | miR-4469                  | 1 |
| <i>circELMOD3</i> | miR-4505/5787             | 5 |
| <i>circELMOD3</i> | miR-4512                  | 1 |

|                   |                                  |   |
|-------------------|----------------------------------|---|
| <i>circELMOD3</i> | miR-4635                         | 1 |
| <i>circELMOD3</i> | miR-4645-5p/4673                 | 3 |
| <i>circELMOD3</i> | miR-4659a-3p/4659b-3p            | 5 |
| <i>circELMOD3</i> | miR-4668-5p                      | 1 |
| <i>circELMOD3</i> | miR-4669                         | 2 |
| <i>circELMOD3</i> | miR-4674                         | 4 |
| <i>circELMOD3</i> | miR-4683                         | 1 |
| <i>circELMOD3</i> | miR-4716-3p/6794-5p              | 1 |
| <i>circELMOD3</i> | miR-4723-5p/5698/6870-5p/7111-5p | 1 |
| <i>circELMOD3</i> | miR-4724-5p                      | 1 |
| <i>circELMOD3</i> | miR-4726-3p                      | 3 |
| <i>circELMOD3</i> | miR-4750-3p                      | 2 |
| <i>circELMOD3</i> | miR-4757-5p/6744-3p              | 1 |
| <i>circELMOD3</i> | miR-4778-3p                      | 4 |
| <i>circELMOD3</i> | miR-4782-5p/5706                 | 4 |
| <i>circELMOD3</i> | miR-4795-5p                      | 1 |
| <i>circELMOD3</i> | miR-4798-3p                      | 3 |
| <i>circELMOD3</i> | miR-484/3155                     | 1 |
| <i>circELMOD3</i> | miR-5010-5p                      | 1 |
| <i>circELMOD3</i> | miR-505-5p                       | 1 |
| <i>circELMOD3</i> | miR-512-3p                       | 1 |
| <i>circELMOD3</i> | miR-516a-3p/516b-3p/7162-5p      | 2 |
| <i>circELMOD3</i> | miR-516b-5p                      | 4 |
| <i>circELMOD3</i> | miR-5186                         | 1 |
| <i>circELMOD3</i> | miR-518c-5p                      | 1 |
| <i>circELMOD3</i> | miR-519-3p                       | 1 |
| <i>circELMOD3</i> | miR-548m                         | 1 |
| <i>circELMOD3</i> | miR-5579-3p                      | 1 |
| <i>circELMOD3</i> | miR-5681a                        | 1 |
| <i>circELMOD3</i> | miR-5691                         | 1 |
| <i>circELMOD3</i> | miR-578                          | 3 |
| <i>circELMOD3</i> | miR-593-3p                       | 1 |
| <i>circELMOD3</i> | miR-604                          | 1 |
| <i>circELMOD3</i> | miR-6079                         | 1 |
| <i>circELMOD3</i> | miR-610                          | 1 |
| <i>circELMOD3</i> | miR-6126                         | 4 |
| <i>circELMOD3</i> | miR-6128                         | 1 |
| <i>circELMOD3</i> | miR-6132/6836-5p                 | 1 |



|                   |                     |   |
|-------------------|---------------------|---|
| <i>circELMOD3</i> | miR-621             | 1 |
| <i>circELMOD3</i> | miR-622             | 1 |
| <i>circELMOD3</i> | miR-625-5p          | 1 |
| <i>circELMOD3</i> | miR-635/6774-5p     | 2 |
| <i>circELMOD3</i> | miR-647             | 5 |
| <i>circELMOD3</i> | miR-6500-3p         | 1 |
| <i>circELMOD3</i> | miR-6511-5p         | 1 |
| <i>circELMOD3</i> | miR-653-3p          | 1 |
| <i>circELMOD3</i> | miR-664a-5p/4794    | 3 |
| <i>circELMOD3</i> | miR-670-5p          | 1 |
| <i>circELMOD3</i> | miR-6730-5p         | 1 |
| <i>circELMOD3</i> | miR-6732-5p         | 1 |
| <i>circELMOD3</i> | miR-6748-3p         | 1 |
| <i>circELMOD3</i> | miR-6762-3p         | 1 |
| <i>circELMOD3</i> | miR-6764-3p/6824-3p | 1 |
| <i>circELMOD3</i> | miR-6800-3p         | 1 |
| <i>circELMOD3</i> | miR-6805-5p         | 1 |
| <i>circELMOD3</i> | miR-6818-3p         | 1 |
| <i>circELMOD3</i> | miR-6822-3p         | 2 |
| <i>circELMOD3</i> | miR-6840-3p         | 3 |
| <i>circELMOD3</i> | miR-6842-3p         | 5 |
| <i>circELMOD3</i> | miR-6864-5p         | 4 |
| <i>circELMOD3</i> | miR-6875-3p         | 5 |
| <i>circELMOD3</i> | miR-6882-3p         | 1 |
| <i>circELMOD3</i> | miR-6888-5p         | 1 |
| <i>circELMOD3</i> | miR-6895-3p         | 1 |
| <i>circELMOD3</i> | miR-6895-5p         | 1 |
| <i>circELMOD3</i> | miR-7106-3p         | 3 |
| <i>circELMOD3</i> | miR-7113-3p         | 1 |
| <i>circELMOD3</i> | miR-7160-3p         | 1 |
| <i>circELMOD3</i> | miR-7515            | 3 |
| <i>circELMOD3</i> | miR-760             | 2 |
| <i>circELMOD3</i> | miR-767-3p          | 1 |
| <i>circELMOD3</i> | miR-8057            | 1 |
| <i>circELMOD3</i> | miR-8069            | 3 |
| <i>circELMOD3</i> | let-7-5p/98-5p      | 3 |
| <i>circELMOD3</i> | miR-103-3p/107      | 2 |
| <i>circELMOD3</i> | miR-103a-2-5p       | 3 |

|                   |                     |   |
|-------------------|---------------------|---|
| <i>circELMOD3</i> | miR-106a-3p         | 2 |
| <i>circELMOD3</i> | miR-1178-5p         | 2 |
| <i>circELMOD3</i> | miR-1182            | 2 |
| <i>circELMOD3</i> | miR-1200            | 1 |
| <i>circELMOD3</i> | miR-1202/3972       | 1 |
| <i>circELMOD3</i> | miR-1228-3p         | 2 |
| <i>circELMOD3</i> | miR-1229-3p         | 2 |
| <i>circELMOD3</i> | miR-1233-3p         | 3 |
| <i>circELMOD3</i> | miR-1245b-3p        | 2 |
| <i>circELMOD3</i> | miR-1249-5p/6797-5p | 3 |
| <i>circELMOD3</i> | miR-1251-3p         | 3 |
| <i>circELMOD3</i> | miR-1260a/1260b     | 2 |
| <i>circELMOD3</i> | miR-1263            | 2 |
| <i>circELMOD3</i> | miR-1269            | 1 |
| <i>circELMOD3</i> | miR-1273g-5p        | 2 |
| <i>circELMOD3</i> | miR-1288-3p         | 1 |
| <i>circELMOD3</i> | miR-1298-3p         | 1 |
| <i>circELMOD3</i> | miR-1301-3p         | 2 |
| <i>circELMOD3</i> | miR-1307-3p         | 2 |
| <i>circELMOD3</i> | miR-1323            | 1 |
| <i>circELMOD3</i> | miR-133a-5p         | 3 |
| <i>circELMOD3</i> | miR-134-3p          | 2 |
| <i>circELMOD3</i> | miR-1343-3p         | 2 |
| <i>circELMOD3</i> | miR-138-5p          | 3 |
| <i>circELMOD3</i> | miR-140-3p.2        | 2 |
| <i>circELMOD3</i> | miR-140-5p          | 2 |
| <i>circELMOD3</i> | miR-141-5p          | 3 |
| <i>circELMOD3</i> | miR-142-3p.1        | 3 |
| <i>circELMOD3</i> | miR-142-3p.2        | 3 |
| <i>circELMOD3</i> | miR-145-3p          | 3 |
| <i>circELMOD3</i> | miR-145-5p          | 2 |
| <i>circELMOD3</i> | miR-146-5p          | 1 |
| <i>circELMOD3</i> | miR-146a-3p         | 1 |
| <i>circELMOD3</i> | miR-146b-3p         | 2 |
| <i>circELMOD3</i> | miR-148b-5p/6874-3p | 2 |
| <i>circELMOD3</i> | miR-150-3p          | 2 |
| <i>circELMOD3</i> | miR-150-5p          | 4 |
| <i>circELMOD3</i> | miR-1538/4745-3p    | 3 |

|                   |                                              |   |
|-------------------|----------------------------------------------|---|
| <i>circELMOD3</i> | miR-15a-3p                                   | 2 |
| <i>circELMOD3</i> | miR-16-2-3p/195-3p                           | 2 |
| <i>circELMOD3</i> | miR-1825                                     | 2 |
| <i>circELMOD3</i> | miR-188-3p                                   | 2 |
| <i>circELMOD3</i> | miR-1910-5p                                  | 3 |
| <i>circELMOD3</i> | miR-1914-5p                                  | 2 |
| <i>circELMOD3</i> | miR-193a-5p                                  | 2 |
| <i>circELMOD3</i> | miR-194-3p                                   | 2 |
| <i>circELMOD3</i> | miR-196-5p                                   | 3 |
| <i>circELMOD3</i> | miR-1972                                     | 2 |
| <i>circELMOD3</i> | miR-199-5p                                   | 2 |
| <i>circELMOD3</i> | miR-203a-5p                                  | 2 |
| <i>circELMOD3</i> | miR-203b-5p/6718-5p                          | 2 |
| <i>circELMOD3</i> | miR-204-5p/211-5p                            | 3 |
| <i>circELMOD3</i> | miR-208-5p                                   | 3 |
| <i>circELMOD3</i> | miR-210-5p                                   | 1 |
| <i>circELMOD3</i> | miR-2114-5p                                  | 3 |
| <i>circELMOD3</i> | miR-2116-3p                                  | 4 |
| <i>circELMOD3</i> | miR-2117                                     | 2 |
| <i>circELMOD3</i> | miR-221-5p/8073                              | 2 |
| <i>circELMOD3</i> | miR-25-3p/32-5p/92-3p/363-3p/367-3p          | 2 |
| <i>circELMOD3</i> | miR-27-3p                                    | 2 |
| <i>circELMOD3</i> | miR-27b-5p                                   | 3 |
| <i>circELMOD3</i> | miR-29b-2-5p                                 | 2 |
| <i>circELMOD3</i> | miR-3065-3p                                  | 2 |
| <i>circELMOD3</i> | miR-3074-5p                                  | 3 |
| <i>circELMOD3</i> | miR-30b-3p/1273h-5p/3689-3p/6779-5p/6780a-5p |   |
| <i>circELMOD3</i> | miR-30c-3p/6788-5p                           | 1 |
| <i>circELMOD3</i> | miR-3123                                     | 1 |
| <i>circELMOD3</i> | miR-3126-3p                                  | 1 |
| <i>circELMOD3</i> | miR-3140-5p                                  | 2 |
| <i>circELMOD3</i> | miR-3141                                     | 3 |
| <i>circELMOD3</i> | miR-3156-3p                                  | 2 |
| <i>circELMOD3</i> | miR-3157-3p                                  | 2 |
| <i>circELMOD3</i> | miR-3165                                     | 3 |
| <i>circELMOD3</i> | miR-3168                                     | 2 |
| <i>circELMOD3</i> | miR-3169                                     | 2 |
| <i>circELMOD3</i> | miR-3173-5p                                  | 2 |

|                   |                       |   |
|-------------------|-----------------------|---|
| <i>circELMOD3</i> | miR-3189-5p           | 1 |
| <i>circELMOD3</i> | miR-329-3p/362-3p     | 3 |
| <i>circELMOD3</i> | miR-345-3p            | 2 |
| <i>circELMOD3</i> | miR-3612              | 3 |
| <i>circELMOD3</i> | miR-3616-3p           | 3 |
| <i>circELMOD3</i> | miR-3619-3p           | 3 |
| <i>circELMOD3</i> | miR-3622a-3p/3622b-3p | 2 |
| <i>circELMOD3</i> | miR-3672/6864-3p      | 2 |
| <i>circELMOD3</i> | miR-3691-3p           | 3 |
| <i>circELMOD3</i> | miR-374c-3p           | 2 |
| <i>circELMOD3</i> | miR-378-3p            | 1 |
| <i>circELMOD3</i> | miR-378a-5p           | 1 |
| <i>circELMOD3</i> | miR-383-3p            | 2 |
| <i>circELMOD3</i> | miR-3907              | 1 |
| <i>circELMOD3</i> | miR-3908              | 3 |
| <i>circELMOD3</i> | miR-3909              | 2 |
| <i>circELMOD3</i> | miR-3913-3p           | 2 |
| <i>circELMOD3</i> | miR-3919              | 1 |
| <i>circELMOD3</i> | miR-3925-5p           | 1 |
| <i>circELMOD3</i> | miR-3927-3p/6831-5p   | 3 |
| <i>circELMOD3</i> | miR-3942-5p           | 3 |
| <i>circELMOD3</i> | miR-3960/8072         | 3 |
| <i>circELMOD3</i> | miR-3977              | 1 |
| <i>circELMOD3</i> | miR-4258              | 2 |
| <i>circELMOD3</i> | miR-4259              | 4 |
| <i>circELMOD3</i> | miR-4265/4296/4322    | 2 |
| <i>circELMOD3</i> | miR-4277              | 2 |
| <i>circELMOD3</i> | miR-4285              | 3 |
| <i>circELMOD3</i> | miR-4291              | 2 |
| <i>circELMOD3</i> | miR-4299              | 3 |
| <i>circELMOD3</i> | miR-4301              | 2 |
| <i>circELMOD3</i> | miR-431-5p            | 4 |
| <i>circELMOD3</i> | miR-4317              | 2 |
| <i>circELMOD3</i> | miR-4318              | 1 |
| <i>circELMOD3</i> | miR-432-5p            | 2 |
| <i>circELMOD3</i> | miR-4320              | 4 |
| <i>circELMOD3</i> | miR-4325              | 4 |
| <i>circELMOD3</i> | miR-4330              | 1 |

|                   |                                              |   |
|-------------------|----------------------------------------------|---|
| <i>circELMOD3</i> | miR-4417                                     | 2 |
| <i>circELMOD3</i> | miR-4434/4516/5703                           | 1 |
| <i>circELMOD3</i> | miR-4436b-3p/4632-5p/6735-5p/6879-5p/7843-5p | 1 |
| <i>circELMOD3</i> | miR-4443                                     | 5 |
| <i>circELMOD3</i> | miR-4456                                     | 3 |
| <i>circELMOD3</i> | miR-4467                                     | 3 |
| <i>circELMOD3</i> | miR-4493                                     | 3 |
| <i>circELMOD3</i> | miR-4501                                     | 1 |
| <i>circELMOD3</i> | miR-4515                                     | 1 |
| <i>circELMOD3</i> | miR-4524a-3p                                 | 2 |
| <i>circELMOD3</i> | miR-4527/6503-5p                             | 2 |
| <i>circELMOD3</i> | miR-4529-5p                                  | 2 |
| <i>circELMOD3</i> | miR-4537                                     | 2 |
| <i>circELMOD3</i> | miR-455-3p.1                                 | 3 |
| <i>circELMOD3</i> | miR-4633-3p/6500-5p                          | 3 |
| <i>circELMOD3</i> | miR-4638-3p                                  | 1 |
| <i>circELMOD3</i> | miR-4638-5p                                  | 2 |
| <i>circELMOD3</i> | miR-4639-3p                                  | 3 |
| <i>circELMOD3</i> | miR-4650-5p                                  | 2 |
| <i>circELMOD3</i> | miR-4655-5p                                  | 1 |
| <i>circELMOD3</i> | miR-4665-3p                                  | 2 |
| <i>circELMOD3</i> | miR-4666a-5p                                 | 2 |
| <i>circELMOD3</i> | miR-4671-5p                                  | 6 |
| <i>circELMOD3</i> | miR-4677-3p                                  | 1 |
| <i>circELMOD3</i> | miR-4679                                     | 1 |
| <i>circELMOD3</i> | miR-4691-5p/6792-3p                          | 2 |
| <i>circELMOD3</i> | miR-4703-3p                                  | 4 |
| <i>circELMOD3</i> | miR-4704-3p                                  | 2 |
| <i>circELMOD3</i> | miR-4715-5p                                  | 4 |
| <i>circELMOD3</i> | miR-4717-5p                                  | 2 |
| <i>circELMOD3</i> | miR-4721                                     | 3 |
| <i>circELMOD3</i> | miR-4722-3p/6727-3p                          | 1 |
| <i>circELMOD3</i> | miR-4727-5p                                  | 1 |
| <i>circELMOD3</i> | miR-4740-5p                                  | 1 |
| <i>circELMOD3</i> | miR-4747-3p                                  | 3 |
| <i>circELMOD3</i> | miR-4749-3p                                  | 1 |
| <i>circELMOD3</i> | miR-4751                                     | 2 |
| <i>circELMOD3</i> | miR-4756-3p                                  | 1 |

|                   |                     |   |
|-------------------|---------------------|---|
| <i>circELMOD3</i> | miR-4758-3p         | 1 |
| <i>circELMOD3</i> | miR-4759            | 2 |
| <i>circELMOD3</i> | miR-4761-3p         | 2 |
| <i>circELMOD3</i> | miR-4766-5p         | 2 |
| <i>circELMOD3</i> | miR-4769-3p/6817-5p | 1 |
| <i>circELMOD3</i> | miR-488-3p          | 2 |
| <i>circELMOD3</i> | miR-488-5p          | 1 |
| <i>circELMOD3</i> | miR-5000-3p         | 3 |
| <i>circELMOD3</i> | miR-5001-3p         | 1 |
| <i>circELMOD3</i> | miR-5004-5p         | 2 |
| <i>circELMOD3</i> | miR-5006-5p         | 1 |
| <i>circELMOD3</i> | miR-5008-5p         | 3 |
| <i>circELMOD3</i> | miR-5009-5p/8058    | 1 |
| <i>circELMOD3</i> | miR-500b-3p         | 1 |
| <i>circELMOD3</i> | miR-501-3p/502-3p   | 2 |
| <i>circELMOD3</i> | miR-504-3p          | 1 |
| <i>circELMOD3</i> | miR-513a-5p         | 2 |
| <i>circELMOD3</i> | miR-5189-3p         | 2 |
| <i>circELMOD3</i> | miR-524-3p/525-3p   | 3 |
| <i>circELMOD3</i> | miR-526b-5p         | 1 |
| <i>circELMOD3</i> | miR-532-3p          | 4 |
| <i>circELMOD3</i> | miR-548q            | 3 |
| <i>circELMOD3</i> | miR-5579-5p         | 2 |
| <i>circELMOD3</i> | miR-5581-3p         | 2 |
| <i>circELMOD3</i> | miR-5584-3p         | 2 |
| <i>circELMOD3</i> | miR-5586-5p         | 4 |
| <i>circELMOD3</i> | miR-5587-5p         | 3 |
| <i>circELMOD3</i> | miR-5588-3p         | 3 |
| <i>circELMOD3</i> | miR-5683            | 2 |
| <i>circELMOD3</i> | miR-5693            | 2 |
| <i>circELMOD3</i> | miR-5699-5p         | 1 |
| <i>circELMOD3</i> | miR-584-5p          | 1 |
| <i>circELMOD3</i> | miR-587             | 2 |
| <i>circELMOD3</i> | miR-589-5p          | 1 |
| <i>circELMOD3</i> | miR-602             | 2 |
| <i>circELMOD3</i> | miR-603             | 3 |
| <i>circELMOD3</i> | miR-605-3p          | 3 |
| <i>circELMOD3</i> | miR-6072/6891-3p    | 1 |

|                   |                     |   |
|-------------------|---------------------|---|
| <i>circELMOD3</i> | miR-6073            | 3 |
| <i>circELMOD3</i> | miR-6074            | 2 |
| <i>circELMOD3</i> | miR-6089            | 3 |
| <i>circELMOD3</i> | miR-6131            | 3 |
| <i>circELMOD3</i> | miR-623             | 3 |
| <i>circELMOD3</i> | miR-627-3p          | 2 |
| <i>circELMOD3</i> | miR-636             | 1 |
| <i>circELMOD3</i> | miR-6511-3p         | 2 |
| <i>circELMOD3</i> | miR-6515-5p         | 5 |
| <i>circELMOD3</i> | miR-6715b-3p        | 2 |
| <i>circELMOD3</i> | miR-6728-3p         | 1 |
| <i>circELMOD3</i> | miR-6731-5p/8085    | 1 |
| <i>circELMOD3</i> | miR-6736-3p         | 2 |
| <i>circELMOD3</i> | miR-6747-3p         | 1 |
| <i>circELMOD3</i> | miR-6749-3p         | 2 |
| <i>circELMOD3</i> | miR-6753-3p/7107-3p | 2 |
| <i>circELMOD3</i> | miR-6757-3p         | 3 |
| <i>circELMOD3</i> | miR-6759-5p         | 2 |
| <i>circELMOD3</i> | miR-6765-3p         | 2 |
| <i>circELMOD3</i> | miR-6776-3p         | 2 |
| <i>circELMOD3</i> | miR-6776-5p         | 2 |
| <i>circELMOD3</i> | miR-6777-3p         | 2 |
| <i>circELMOD3</i> | miR-6784-3p/6862-3p | 2 |
| <i>circELMOD3</i> | miR-6787-3p         | 2 |
| <i>circELMOD3</i> | miR-6793-3p         | 1 |
| <i>circELMOD3</i> | miR-6795-3p         | 1 |
| <i>circELMOD3</i> | miR-6796-5p         | 2 |
| <i>circELMOD3</i> | miR-6801-5p         | 7 |
| <i>circELMOD3</i> | miR-6802-3p         | 2 |
| <i>circELMOD3</i> | miR-6814-3p/6872-5p | 2 |
| <i>circELMOD3</i> | miR-6817-3p         | 1 |
| <i>circELMOD3</i> | miR-6819-3p/6877-3p | 2 |
| <i>circELMOD3</i> | miR-6823-5p         | 2 |
| <i>circELMOD3</i> | miR-6832-3p         | 3 |
| <i>circELMOD3</i> | miR-6838-3p         | 3 |
| <i>circELMOD3</i> | miR-6843-3p/6848-3p | 2 |
| <i>circELMOD3</i> | miR-6861-5p         | 2 |
| <i>circELMOD3</i> | miR-6868-3p         | 3 |

|                   |              |   |
|-------------------|--------------|---|
| <i>circELMOD3</i> | miR-6871-5p  | 1 |
| <i>circELMOD3</i> | miR-6872-3p  | 2 |
| <i>circELMOD3</i> | miR-6874-5p  | 5 |
| <i>circELMOD3</i> | miR-6878-5p  | 1 |
| <i>circELMOD3</i> | miR-6880-5p  | 3 |
| <i>circELMOD3</i> | miR-6887-3p  | 1 |
| <i>circELMOD3</i> | miR-6894-5p  | 2 |
| <i>circELMOD3</i> | miR-7108-3p  | 2 |
| <i>circELMOD3</i> | miR-7110-3p  | 1 |
| <i>circELMOD3</i> | miR-7114-5p  | 2 |
| <i>circELMOD3</i> | miR-7152-5p  | 3 |
| <i>circELMOD3</i> | miR-7153-3p  | 2 |
| <i>circELMOD3</i> | miR-7154-3p  | 2 |
| <i>circELMOD3</i> | miR-7156-3p  | 2 |
| <i>circELMOD3</i> | miR-7161-3p  | 1 |
| <i>circELMOD3</i> | miR-765      | 2 |
| <i>circELMOD3</i> | miR-766-5p   | 2 |
| <i>circELMOD3</i> | miR-7703     | 4 |
| <i>circELMOD3</i> | miR-7847-3p  | 3 |
| <i>circELMOD3</i> | miR-7850-5p  | 3 |
| <i>circELMOD3</i> | miR-7976     | 2 |
| <i>circELMOD3</i> | miR-7977     | 2 |
| <i>circELMOD3</i> | miR-7978     | 3 |
| <i>circELMOD3</i> | miR-8060     | 2 |
| <i>circELMOD3</i> | miR-8064     | 2 |
| <i>circELMOD3</i> | miR-8066     | 1 |
| <i>circELMOD3</i> | miR-8071     | 3 |
| <i>circELMOD3</i> | miR-8083     | 2 |
| <i>circELMOD3</i> | miR-8485     | 3 |
| <i>circELMOD3</i> | miR-874-3p   | 2 |
| <i>circELMOD3</i> | miR-877-3p   | 2 |
| <i>circELMOD3</i> | miR-890      | 2 |
| <i>circELMOD3</i> | miR-891b     | 2 |
| <i>circELMOD3</i> | miR-892a     | 1 |
| <i>circELMOD3</i> | miR-9-5p     | 3 |
| <i>circELMOD3</i> | miR-935      | 2 |
| <i>circEML2</i>   | miR-1-3p/206 | 1 |
| <i>circEML2</i>   | miR-105-3p   | 1 |



|                 |                          |   |
|-----------------|--------------------------|---|
| <i>circEML2</i> | miR-1207-3p              | 1 |
| <i>circEML2</i> | miR-1224-5p              | 1 |
| <i>circEML2</i> | miR-1226-3p              | 1 |
| <i>circEML2</i> | miR-1226-5p              | 1 |
| <i>circEML2</i> | miR-1237-5p/4488/4697-5p | 1 |
| <i>circEML2</i> | miR-1266-3p              | 1 |
| <i>circEML2</i> | miR-1272                 | 1 |
| <i>circEML2</i> | miR-1288-5p              | 1 |
| <i>circEML2</i> | miR-1294                 | 1 |
| <i>circEML2</i> | miR-1298-3p              | 1 |
| <i>circEML2</i> | miR-1322                 | 1 |
| <i>circEML2</i> | miR-138-1-3p             | 1 |
| <i>circEML2</i> | miR-140-3p.1             | 1 |
| <i>circEML2</i> | miR-144-5p               | 1 |
| <i>circEML2</i> | miR-146a-3p              | 1 |
| <i>circEML2</i> | miR-148-3p/152-3p        | 1 |
| <i>circEML2</i> | miR-148a-5p              | 1 |
| <i>circEML2</i> | miR-149-5p               | 1 |
| <i>circEML2</i> | miR-1538/4745-3p         | 1 |
| <i>circEML2</i> | miR-182-5p               | 1 |
| <i>circEML2</i> | miR-1825                 | 1 |
| <i>circEML2</i> | miR-184                  | 1 |
| <i>circEML2</i> | miR-187-5p               | 1 |
| <i>circEML2</i> | miR-197-3p               | 1 |
| <i>circEML2</i> | miR-199-5p               | 1 |
| <i>circEML2</i> | miR-215-3p               | 1 |
| <i>circEML2</i> | miR-25-5p                | 1 |
| <i>circEML2</i> | miR-3074-3p              | 1 |
| <i>circEML2</i> | miR-3126-3p              | 1 |
| <i>circEML2</i> | miR-3144-5p              | 1 |
| <i>circEML2</i> | miR-3157-5p              | 1 |
| <i>circEML2</i> | miR-3180-3p              | 1 |
| <i>circEML2</i> | miR-3191-3p              | 1 |
| <i>circEML2</i> | miR-328-3p               | 1 |
| <i>circEML2</i> | miR-331-3p               | 1 |
| <i>circEML2</i> | miR-3622a-3p/3622b-3p    | 1 |
| <i>circEML2</i> | miR-3649                 | 1 |
| <i>circEML2</i> | miR-3657                 | 1 |

|                 |                     |   |
|-----------------|---------------------|---|
| <i>circEML2</i> | miR-3663-5p         | 1 |
| <i>circEML2</i> | miR-3688-3p         | 1 |
| <i>circEML2</i> | miR-3692-5p         | 1 |
| <i>circEML2</i> | miR-370-3p          | 1 |
| <i>circEML2</i> | miR-382-5p          | 1 |
| <i>circEML2</i> | miR-383-5p.2        | 1 |
| <i>circEML2</i> | miR-3914            | 1 |
| <i>circEML2</i> | miR-3915            | 1 |
| <i>circEML2</i> | miR-3928-3p         | 1 |
| <i>circEML2</i> | miR-3973            | 1 |
| <i>circEML2</i> | miR-423-5p          | 1 |
| <i>circEML2</i> | miR-4303            | 1 |
| <i>circEML2</i> | miR-4316            | 1 |
| <i>circEML2</i> | miR-433-3p          | 1 |
| <i>circEML2</i> | miR-4470            | 1 |
| <i>circEML2</i> | miR-4474-3p         | 1 |
| <i>circEML2</i> | miR-4502            | 1 |
| <i>circEML2</i> | miR-4506            | 1 |
| <i>circEML2</i> | miR-4527/6503-5p    | 1 |
| <i>circEML2</i> | miR-4640-5p         | 1 |
| <i>circEML2</i> | miR-4649-3p         | 1 |
| <i>circEML2</i> | miR-4652-5p         | 1 |
| <i>circEML2</i> | miR-4669            | 1 |
| <i>circEML2</i> | miR-4670-3p         | 1 |
| <i>circEML2</i> | miR-4677-3p         | 1 |
| <i>circEML2</i> | miR-4679            | 1 |
| <i>circEML2</i> | miR-4689/6858-5p    | 1 |
| <i>circEML2</i> | miR-4707-3p         | 1 |
| <i>circEML2</i> | miR-4716-3p/6794-5p | 1 |
| <i>circEML2</i> | miR-4728-3p         | 1 |
| <i>circEML2</i> | miR-4733-3p         | 1 |
| <i>circEML2</i> | miR-4747-5p/5196-5p | 1 |
| <i>circEML2</i> | miR-4754            | 1 |
| <i>circEML2</i> | miR-4790-3p         | 1 |
| <i>circEML2</i> | miR-4802-3p         | 1 |
| <i>circEML2</i> | miR-486-5p          | 1 |
| <i>circEML2</i> | miR-490-5p          | 1 |
| <i>circEML2</i> | miR-495-5p          | 1 |

|                 |                     |   |
|-----------------|---------------------|---|
| <i>circEML2</i> | miR-5000-5p         | 1 |
| <i>circEML2</i> | miR-5194            | 1 |
| <i>circEML2</i> | miR-5195-5p         | 1 |
| <i>circEML2</i> | miR-520g-3p         | 1 |
| <i>circEML2</i> | miR-542-5p          | 1 |
| <i>circEML2</i> | miR-548a1/4445-3p   | 1 |
| <i>circEML2</i> | miR-548at-5p        | 1 |
| <i>circEML2</i> | miR-5571-3p         | 1 |
| <i>circEML2</i> | miR-5580-5p         | 1 |
| <i>circEML2</i> | miR-561-3p          | 1 |
| <i>circEML2</i> | miR-5690            | 1 |
| <i>circEML2</i> | miR-5694            | 1 |
| <i>circEML2</i> | miR-581             | 1 |
| <i>circEML2</i> | miR-582-3p          | 2 |
| <i>circEML2</i> | miR-592             | 1 |
| <i>circEML2</i> | miR-599             | 1 |
| <i>circEML2</i> | miR-626/6876-3p     | 1 |
| <i>circEML2</i> | miR-6505-5p         | 1 |
| <i>circEML2</i> | miR-6508-3p         | 1 |
| <i>circEML2</i> | miR-663b            | 1 |
| <i>circEML2</i> | miR-664a-5p/4794    | 1 |
| <i>circEML2</i> | miR-6724-5p/6773-5p | 1 |
| <i>circEML2</i> | miR-6727-5p         | 1 |
| <i>circEML2</i> | miR-6732-5p         | 1 |
| <i>circEML2</i> | miR-6734-5p         | 1 |
| <i>circEML2</i> | miR-6752-3p         | 1 |
| <i>circEML2</i> | miR-6753-3p/7107-3p | 1 |
| <i>circEML2</i> | miR-676-3p          | 1 |
| <i>circEML2</i> | miR-6765-3p         | 1 |
| <i>circEML2</i> | miR-6773-3p         | 1 |
| <i>circEML2</i> | miR-6777-5p/6889-5p | 1 |
| <i>circEML2</i> | miR-6792-5p         | 1 |
| <i>circEML2</i> | miR-6798-3p         | 1 |
| <i>circEML2</i> | miR-6801-3p/6810-3p | 1 |
| <i>circEML2</i> | miR-6805-5p         | 1 |
| <i>circEML2</i> | miR-6812-3p         | 1 |
| <i>circEML2</i> | miR-6815-3p         | 1 |
| <i>circEML2</i> | miR-6819-3p/6877-3p | 1 |

|                  |                     |   |
|------------------|---------------------|---|
| <i>circEML2</i>  | miR-6827-5p         | 1 |
| <i>circEML2</i>  | miR-6834-5p         | 1 |
| <i>circEML2</i>  | miR-6843-3p/6848-3p | 1 |
| <i>circEML2</i>  | miR-6846-5p/6848-5p | 1 |
| <i>circEML2</i>  | miR-6850-5p         | 1 |
| <i>circEML2</i>  | miR-6871-5p         | 1 |
| <i>circEML2</i>  | miR-7108-5p         | 1 |
| <i>circEML2</i>  | miR-711             | 1 |
| <i>circEML2</i>  | miR-7114-5p         | 1 |
| <i>circEML2</i>  | miR-7152-3p         | 1 |
| <i>circEML2</i>  | miR-7154-5p         | 1 |
| <i>circEML2</i>  | miR-7162-3p         | 1 |
| <i>circEML2</i>  | miR-7975            | 1 |
| <i>circEML2</i>  | miR-8075            | 1 |
| <i>circEML2</i>  | miR-9-5p            | 1 |
| <i>circEML2</i>  | miR-93-3p           | 1 |
| <i>circEML2</i>  | miR-941             | 1 |
| <i>circEML2</i>  | miR-95-3p           | 1 |
| <i>circEML2</i>  | miR-96-5p/1271-5p   | 1 |
| <i>circEP300</i> | miR-103-3p/107      | 2 |
| <i>circEP300</i> | miR-103a-2-5p       | 1 |
| <i>circEP300</i> | miR-1179            | 1 |
| <i>circEP300</i> | miR-1180-5p         | 1 |
| <i>circEP300</i> | miR-1184            | 1 |
| <i>circEP300</i> | miR-1200            | 1 |
| <i>circEP300</i> | miR-1205            | 1 |
| <i>circEP300</i> | miR-1208            | 1 |
| <i>circEP300</i> | miR-1227-3p         | 1 |
| <i>circEP300</i> | miR-1243            | 1 |
| <i>circEP300</i> | miR-1244            | 1 |
| <i>circEP300</i> | miR-1249-5p/6797-5p | 1 |
| <i>circEP300</i> | miR-1256            | 1 |
| <i>circEP300</i> | miR-1258            | 1 |
| <i>circEP300</i> | miR-1267            | 1 |
| <i>circEP300</i> | miR-1273g-3p        | 1 |
| <i>circEP300</i> | miR-1273h-3p        | 1 |
| <i>circEP300</i> | miR-1286            | 1 |
| <i>circEP300</i> | miR-1291/6775-3p    | 1 |

|                  |                                      |   |
|------------------|--------------------------------------|---|
| <i>circEP300</i> | miR-1295a                            | 1 |
| <i>circEP300</i> | miR-1295b-5p/1912                    | 1 |
| <i>circEP300</i> | miR-1298-5p                          | 1 |
| <i>circEP300</i> | miR-1299                             | 1 |
| <i>circEP300</i> | miR-1301-3p                          | 1 |
| <i>circEP300</i> | miR-133a-3p.1                        | 1 |
| <i>circEP300</i> | miR-1343-3p                          | 1 |
| <i>circEP300</i> | miR-135-5p                           | 1 |
| <i>circEP300</i> | miR-142-3p.1                         | 1 |
| <i>circEP300</i> | miR-145-3p                           | 1 |
| <i>circEP300</i> | miR-145-5p                           | 1 |
| <i>circEP300</i> | miR-146b-3p                          | 1 |
| <i>circEP300</i> | miR-148b-5p/6874-3p                  | 1 |
| <i>circEP300</i> | miR-149-3p/4728-5p/6785-5p/6883-5p   | 1 |
| <i>circEP300</i> | miR-15-5p/16-5p/195-5p/424-5p/497-5p | 1 |
| <i>circEP300</i> | miR-17-3p                            | 1 |
| <i>circEP300</i> | miR-18-5p                            | 1 |
| <i>circEP300</i> | miR-182-5p                           | 1 |
| <i>circEP300</i> | miR-1915-3p/6764-5p                  | 1 |
| <i>circEP300</i> | miR-193-3p                           | 1 |
| <i>circEP300</i> | miR-199-3p                           | 1 |
| <i>circEP300</i> | miR-200ab-5p                         | 1 |
| <i>circEP300</i> | miR-205-5p                           | 1 |
| <i>circEP300</i> | miR-20b-3p                           | 1 |
| <i>circEP300</i> | miR-2113                             | 1 |
| <i>circEP300</i> | miR-2116-5p                          | 1 |
| <i>circEP300</i> | miR-214-3p/3619-5p                   | 1 |
| <i>circEP300</i> | miR-219-5p                           | 1 |
| <i>circEP300</i> | miR-22-3p                            | 1 |
| <i>circEP300</i> | miR-22-5p                            | 1 |
| <i>circEP300</i> | miR-224-5p                           | 1 |
| <i>circEP300</i> | miR-2392                             | 1 |
| <i>circEP300</i> | miR-29a-5p                           | 1 |
| <i>circEP300</i> | miR-29b-1-5p                         | 1 |
| <i>circEP300</i> | miR-3064-5p                          | 1 |
| <i>circEP300</i> | miR-3074-5p                          | 1 |
| <i>circEP300</i> | miR-3117-3p                          | 1 |
| <i>circEP300</i> | miR-3120-5p                          | 1 |

|                  |                     |   |
|------------------|---------------------|---|
| <i>circEP300</i> | miR-3124-3p         | 1 |
| <i>circEP300</i> | miR-3127-3p/6756-3p | 1 |
| <i>circEP300</i> | miR-3128            | 1 |
| <i>circEP300</i> | miR-3130-5p/4482-5p | 1 |
| <i>circEP300</i> | miR-3137            | 1 |
| <i>circEP300</i> | miR-3154            | 1 |
| <i>circEP300</i> | miR-3156-5p         | 1 |
| <i>circEP300</i> | miR-3158-5p         | 1 |
| <i>circEP300</i> | miR-3160-3p         | 1 |
| <i>circEP300</i> | miR-3168            | 1 |
| <i>circEP300</i> | miR-3173-5p         | 1 |
| <i>circEP300</i> | miR-3180-5p         | 2 |
| <i>circEP300</i> | miR-3182            | 1 |
| <i>circEP300</i> | miR-323a-5p         | 1 |
| <i>circEP300</i> | miR-330-3p.2        | 1 |
| <i>circEP300</i> | miR-340-3p/6827-3p  | 1 |
| <i>circEP300</i> | miR-3611            | 1 |
| <i>circEP300</i> | miR-3616-3p         | 1 |
| <i>circEP300</i> | miR-3654            | 1 |
| <i>circEP300</i> | miR-3663-5p         | 1 |
| <i>circEP300</i> | miR-367-5p          | 1 |
| <i>circEP300</i> | miR-3678-3p         | 1 |
| <i>circEP300</i> | miR-3680-3p         | 1 |
| <i>circEP300</i> | miR-3681-5p         | 1 |
| <i>circEP300</i> | miR-3682-3p         | 1 |
| <i>circEP300</i> | miR-3686            | 1 |
| <i>circEP300</i> | miR-3688-3p         | 1 |
| <i>circEP300</i> | miR-3690            | 1 |
| <i>circEP300</i> | miR-3691-5p         | 1 |
| <i>circEP300</i> | miR-3692-5p         | 1 |
| <i>circEP300</i> | miR-376a-2-5p       | 1 |
| <i>circEP300</i> | miR-376a-5p         | 1 |
| <i>circEP300</i> | miR-378a-5p         | 1 |
| <i>circEP300</i> | miR-378j/6839-5p    | 2 |
| <i>circEP300</i> | miR-380-5p/563      | 1 |
| <i>circEP300</i> | miR-3977            | 1 |
| <i>circEP300</i> | miR-3978            | 1 |
| <i>circEP300</i> | miR-4252            | 1 |

|                  |                                              |   |
|------------------|----------------------------------------------|---|
| <i>circEP300</i> | miR-4254                                     | 1 |
| <i>circEP300</i> | miR-4261                                     | 1 |
| <i>circEP300</i> | miR-4270/4441/6754-5p                        | 1 |
| <i>circEP300</i> | miR-4273/7156-5p                             | 1 |
| <i>circEP300</i> | miR-4292/6791-5p                             | 1 |
| <i>circEP300</i> | miR-4308                                     | 1 |
| <i>circEP300</i> | miR-4310/7157-5p                             | 1 |
| <i>circEP300</i> | miR-432-3p                                   | 1 |
| <i>circEP300</i> | miR-432-5p                                   | 1 |
| <i>circEP300</i> | miR-4320                                     | 1 |
| <i>circEP300</i> | miR-4324                                     | 1 |
| <i>circEP300</i> | miR-4422                                     | 1 |
| <i>circEP300</i> | miR-4426/4647/4662b                          | 1 |
| <i>circEP300</i> | miR-4433a-5p                                 | 1 |
| <i>circEP300</i> | miR-4433b-5p                                 | 2 |
| <i>circEP300</i> | miR-4436b-3p/4632-5p/6735-5p/6879-5p/7843-5p | 1 |
| <i>circEP300</i> | miR-4445-5p                                  | 1 |
| <i>circEP300</i> | miR-4454                                     | 1 |
| <i>circEP300</i> | miR-4460                                     | 1 |
| <i>circEP300</i> | miR-4464/4748                                | 1 |
| <i>circEP300</i> | miR-4474-5p                                  | 1 |
| <i>circEP300</i> | miR-4487                                     | 1 |
| <i>circEP300</i> | miR-4496                                     | 1 |
| <i>circEP300</i> | miR-450b-5p                                  | 1 |
| <i>circEP300</i> | miR-4517                                     | 1 |
| <i>circEP300</i> | miR-452-5p/892-3p                            | 1 |
| <i>circEP300</i> | miR-4520-2-3p                                | 1 |
| <i>circEP300</i> | miR-4529-3p                                  | 1 |
| <i>circEP300</i> | miR-4536-5p                                  | 1 |
| <i>circEP300</i> | miR-4642                                     | 2 |
| <i>circEP300</i> | miR-4652-3p                                  | 1 |
| <i>circEP300</i> | miR-4659a-3p/4659b-3p                        | 4 |
| <i>circEP300</i> | miR-4661-3p                                  | 1 |
| <i>circEP300</i> | miR-4666a-5p                                 | 1 |
| <i>circEP300</i> | miR-4677-5p                                  | 1 |
| <i>circEP300</i> | miR-4682                                     | 1 |
| <i>circEP300</i> | miR-4685-5p/6837-5p                          | 1 |
| <i>circEP300</i> | miR-4687-3p                                  | 1 |

|                  |                             |   |
|------------------|-----------------------------|---|
| <i>circEP300</i> | miR-4690-5p                 | 1 |
| <i>circEP300</i> | miR-4699-5p                 | 1 |
| <i>circEP300</i> | miR-4715-3p                 | 1 |
| <i>circEP300</i> | miR-4716-5p                 | 1 |
| <i>circEP300</i> | miR-4720-5p/4799-3p/5588-5p | 1 |
| <i>circEP300</i> | miR-4721                    | 1 |
| <i>circEP300</i> | miR-4722-5p                 | 1 |
| <i>circEP300</i> | miR-4726-3p                 | 1 |
| <i>circEP300</i> | miR-4727-3p                 | 1 |
| <i>circEP300</i> | miR-4738-3p                 | 1 |
| <i>circEP300</i> | miR-4739                    | 1 |
| <i>circEP300</i> | miR-4743-3p                 | 1 |
| <i>circEP300</i> | miR-4747-3p                 | 1 |
| <i>circEP300</i> | miR-4761-3p                 | 1 |
| <i>circEP300</i> | miR-4763-5p                 | 1 |
| <i>circEP300</i> | miR-4782-5p/5706            | 1 |
| <i>circEP300</i> | miR-4800-3p                 | 1 |
| <i>circEP300</i> | miR-4804-5p                 | 1 |
| <i>circEP300</i> | miR-490-5p                  | 1 |
| <i>circEP300</i> | miR-493-3p                  | 1 |
| <i>circEP300</i> | miR-5002-5p                 | 1 |
| <i>circEP300</i> | miR-5010-3p                 | 1 |
| <i>circEP300</i> | miR-503-5p                  | 1 |
| <i>circEP300</i> | miR-507/557                 | 1 |
| <i>circEP300</i> | miR-508-3p                  | 1 |
| <i>circEP300</i> | miR-5088-3p                 | 1 |
| <i>circEP300</i> | miR-5093                    | 1 |
| <i>circEP300</i> | miR-511-5p                  | 1 |
| <i>circEP300</i> | miR-516b-5p                 | 1 |
| <i>circEP300</i> | miR-517-3p                  | 1 |
| <i>circEP300</i> | miR-532-5p                  | 1 |
| <i>circEP300</i> | miR-539-3p                  | 1 |
| <i>circEP300</i> | miR-544a                    | 1 |
| <i>circEP300</i> | miR-544b                    | 1 |
| <i>circEP300</i> | miR-548av-3p                | 1 |
| <i>circEP300</i> | miR-558                     | 1 |
| <i>circEP300</i> | miR-5583-3p                 | 1 |
| <i>circEP300</i> | miR-5584-3p                 | 1 |



|                  |                     |   |
|------------------|---------------------|---|
| <i>circEP300</i> | miR-5690            | 1 |
| <i>circEP300</i> | miR-5704            | 1 |
| <i>circEP300</i> | miR-572             | 1 |
| <i>circEP300</i> | miR-587             | 1 |
| <i>circEP300</i> | miR-6071            | 1 |
| <i>circEP300</i> | miR-6073            | 1 |
| <i>circEP300</i> | miR-6128            | 1 |
| <i>circEP300</i> | miR-615-3p          | 1 |
| <i>circEP300</i> | miR-616-3p          | 1 |
| <i>circEP300</i> | miR-6165            | 1 |
| <i>circEP300</i> | miR-626/6876-3p     | 1 |
| <i>circEP300</i> | miR-630             | 1 |
| <i>circEP300</i> | miR-646             | 1 |
| <i>circEP300</i> | miR-6508-5p/8067    | 1 |
| <i>circEP300</i> | miR-6510-5p         | 1 |
| <i>circEP300</i> | miR-6514-3p         | 1 |
| <i>circEP300</i> | miR-6516-5p         | 1 |
| <i>circEP300</i> | miR-656-5p          | 1 |
| <i>circEP300</i> | miR-664a-3p         | 2 |
| <i>circEP300</i> | miR-665             | 1 |
| <i>circEP300</i> | miR-6738-3p         | 1 |
| <i>circEP300</i> | miR-6757-3p         | 1 |
| <i>circEP300</i> | miR-6760-3p         | 1 |
| <i>circEP300</i> | miR-6760-5p         | 1 |
| <i>circEP300</i> | miR-6787-3p         | 1 |
| <i>circEP300</i> | miR-6799-5p         | 1 |
| <i>circEP300</i> | miR-6815-5p/6865-5p | 1 |
| <i>circEP300</i> | miR-6826-3p         | 1 |
| <i>circEP300</i> | miR-6828-3p         | 1 |
| <i>circEP300</i> | miR-6830-3p         | 1 |
| <i>circEP300</i> | miR-6834-3p         | 1 |
| <i>circEP300</i> | miR-6840-3p         | 1 |
| <i>circEP300</i> | miR-6851-3p         | 1 |
| <i>circEP300</i> | miR-6868-3p         | 1 |
| <i>circEP300</i> | miR-6868-5p         | 1 |
| <i>circEP300</i> | miR-6869-5p         | 1 |
| <i>circEP300</i> | miR-6872-3p         | 1 |
| <i>circEP300</i> | miR-6875-3p         | 4 |

|                  |                     |   |
|------------------|---------------------|---|
| <i>circEP300</i> | miR-6888-3p         | 1 |
| <i>circEP300</i> | miR-6894-3p         | 1 |
| <i>circEP300</i> | miR-7-3p            | 1 |
| <i>circEP300</i> | miR-708-3p          | 1 |
| <i>circEP300</i> | miR-7106-5p         | 1 |
| <i>circEP300</i> | miR-711             | 1 |
| <i>circEP300</i> | miR-7113-5p         | 1 |
| <i>circEP300</i> | miR-7152-3p         | 1 |
| <i>circEP300</i> | miR-7152-5p         | 1 |
| <i>circEP300</i> | miR-7153-3p         | 1 |
| <i>circEP300</i> | miR-7156-3p         | 1 |
| <i>circEP300</i> | miR-718             | 1 |
| <i>circEP300</i> | miR-758-3p          | 1 |
| <i>circEP300</i> | miR-758-5p          | 1 |
| <i>circEP300</i> | miR-7974            | 1 |
| <i>circEP300</i> | miR-7976            | 1 |
| <i>circEP300</i> | miR-8056            | 1 |
| <i>circEP300</i> | miR-8064            | 1 |
| <i>circEP300</i> | miR-8065            | 1 |
| <i>circEP300</i> | miR-8068            | 1 |
| <i>circEP300</i> | miR-8069            | 1 |
| <i>circEP300</i> | miR-8074            | 1 |
| <i>circEP300</i> | miR-8076            | 1 |
| <i>circEP300</i> | miR-873-5p.2        | 1 |
| <i>circEP300</i> | miR-875-3p          | 1 |
| <i>circEP300</i> | miR-876-3p          | 1 |
| <i>circEP300</i> | miR-889-3p          | 1 |
| <i>circEP300</i> | miR-889-5p          | 1 |
| <i>circEP300</i> | miR-891b            | 1 |
| <i>circEP300</i> | miR-9-3p            | 1 |
| <i>circEP300</i> | miR-922             | 1 |
| <i>circEP300</i> | miR-93-3p           | 1 |
| <i>circEP300</i> | miR-936             | 1 |
| <i>circEP300</i> | miR-96-5p/1271-5p   | 1 |
| <i>circEP300</i> | miR-1236-3p         | 1 |
| <i>circEP300</i> | miR-1238-3p         | 2 |
| <i>circEP300</i> | miR-124-3p.1        | 1 |
| <i>circEP300</i> | miR-124-3p.2/506-3p | 1 |

|                  |                           |   |
|------------------|---------------------------|---|
| <i>circEP300</i> | miR-1250-3p               | 1 |
| <i>circEP300</i> | miR-125b-1-3p             | 1 |
| <i>circEP300</i> | miR-125b-2-3p             | 1 |
| <i>circEP300</i> | miR-126-5p                | 1 |
| <i>circEP300</i> | miR-1266-3p               | 1 |
| <i>circEP300</i> | miR-1266-5p/4518          | 1 |
| <i>circEP300</i> | miR-129-5p                | 2 |
| <i>circEP300</i> | miR-130b-5p               | 1 |
| <i>circEP300</i> | miR-133a-3p.2/133b        | 1 |
| <i>circEP300</i> | miR-133a-5p               | 2 |
| <i>circEP300</i> | miR-136-5p                | 1 |
| <i>circEP300</i> | miR-138-5p                | 2 |
| <i>circEP300</i> | miR-141-5p                | 2 |
| <i>circEP300</i> | miR-146a-3p               | 1 |
| <i>circEP300</i> | miR-155-5p                | 1 |
| <i>circEP300</i> | miR-185-3p                | 2 |
| <i>circEP300</i> | miR-193b-5p               | 1 |
| <i>circEP300</i> | miR-1976                  | 1 |
| <i>circEP300</i> | miR-204-5p/211-5p         | 1 |
| <i>circEP300</i> | miR-2053                  | 1 |
| <i>circEP300</i> | miR-210-5p                | 1 |
| <i>circEP300</i> | miR-212-5p                | 1 |
| <i>circEP300</i> | miR-218-5p                | 1 |
| <i>circEP300</i> | miR-222-5p                | 1 |
| <i>circEP300</i> | miR-23-3p                 | 1 |
| <i>circEP300</i> | miR-26b-3p                | 1 |
| <i>circEP300</i> | miR-29b-2-5p              | 1 |
| <i>circEP300</i> | miR-3121-5p               | 1 |
| <i>circEP300</i> | miR-3160-5p               | 2 |
| <i>circEP300</i> | miR-3162-3p               | 1 |
| <i>circEP300</i> | miR-3183/4723-3p/6769b-3p | 1 |
| <i>circEP300</i> | miR-3189-3p               | 1 |
| <i>circEP300</i> | miR-324-5p                | 1 |
| <i>circEP300</i> | miR-3614-5p               | 1 |
| <i>circEP300</i> | miR-3615                  | 1 |
| <i>circEP300</i> | miR-3653-5p               | 1 |
| <i>circEP300</i> | miR-3664-3p               | 1 |
| <i>circEP300</i> | miR-3688-5p               | 1 |

|                  |                             |   |
|------------------|-----------------------------|---|
| <i>circEP300</i> | miR-3714                    | 1 |
| <i>circEP300</i> | miR-374b-3p                 | 1 |
| <i>circEP300</i> | miR-3910                    | 1 |
| <i>circEP300</i> | miR-3929/4419b/4478         | 1 |
| <i>circEP300</i> | miR-3945                    | 1 |
| <i>circEP300</i> | miR-4253/6862-5p            | 1 |
| <i>circEP300</i> | miR-4277                    | 1 |
| <i>circEP300</i> | miR-4287/4685-3p            | 1 |
| <i>circEP300</i> | miR-4299                    | 1 |
| <i>circEP300</i> | miR-431-3p                  | 1 |
| <i>circEP300</i> | miR-4317                    | 1 |
| <i>circEP300</i> | miR-4325                    | 1 |
| <i>circEP300</i> | miR-4326                    | 1 |
| <i>circEP300</i> | miR-4423-5p                 | 1 |
| <i>circEP300</i> | miR-4456                    | 1 |
| <i>circEP300</i> | miR-4469                    | 1 |
| <i>circEP300</i> | miR-4532                    | 1 |
| <i>circEP300</i> | miR-4640-5p                 | 1 |
| <i>circEP300</i> | miR-4655-3p                 | 1 |
| <i>circEP300</i> | miR-4677-3p                 | 1 |
| <i>circEP300</i> | miR-4679                    | 1 |
| <i>circEP300</i> | miR-4691-5p/6792-3p         | 1 |
| <i>circEP300</i> | miR-4694-5p                 | 1 |
| <i>circEP300</i> | miR-4713-5p                 | 1 |
| <i>circEP300</i> | miR-4749-3p                 | 1 |
| <i>circEP300</i> | miR-4753-3p                 | 1 |
| <i>circEP300</i> | miR-4760-5p/8061            | 1 |
| <i>circEP300</i> | miR-4768-5p/6833-3p         | 1 |
| <i>circEP300</i> | miR-4773                    | 1 |
| <i>circEP300</i> | miR-4778-3p                 | 3 |
| <i>circEP300</i> | miR-4780                    | 1 |
| <i>circEP300</i> | miR-4795-3p                 | 1 |
| <i>circEP300</i> | miR-484/3155                | 1 |
| <i>circEP300</i> | miR-491-3p                  | 1 |
| <i>circEP300</i> | miR-5008-3p/6737-3p/7157-3p | 1 |
| <i>circEP300</i> | miR-512-5p                  | 1 |
| <i>circEP300</i> | miR-515-5p/519e-5p          | 1 |
| <i>circEP300</i> | miR-5193                    | 1 |

|                  |                     |   |
|------------------|---------------------|---|
| <i>circEP300</i> | miR-525-5p          | 1 |
| <i>circEP300</i> | miR-543             | 1 |
| <i>circEP300</i> | miR-548q            | 1 |
| <i>circEP300</i> | miR-551b-5p         | 1 |
| <i>circEP300</i> | miR-5581-3p         | 1 |
| <i>circEP300</i> | miR-5587-5p         | 1 |
| <i>circEP300</i> | miR-5680            | 1 |
| <i>circEP300</i> | miR-569             | 1 |
| <i>circEP300</i> | miR-5691            | 1 |
| <i>circEP300</i> | miR-5692a           | 1 |
| <i>circEP300</i> | miR-578             | 1 |
| <i>circEP300</i> | miR-584-3p          | 1 |
| <i>circEP300</i> | miR-589-3p          | 1 |
| <i>circEP300</i> | miR-604             | 1 |
| <i>circEP300</i> | miR-6131            | 2 |
| <i>circEP300</i> | miR-623             | 1 |
| <i>circEP300</i> | miR-629-3p          | 1 |
| <i>circEP300</i> | miR-629-5p          | 1 |
| <i>circEP300</i> | miR-636             | 1 |
| <i>circEP300</i> | miR-6500-3p         | 1 |
| <i>circEP300</i> | miR-6501-5p         | 1 |
| <i>circEP300</i> | miR-6508-3p         | 1 |
| <i>circEP300</i> | miR-6515-3p         | 1 |
| <i>circEP300</i> | miR-660-3p          | 1 |
| <i>circEP300</i> | miR-670-3p          | 2 |
| <i>circEP300</i> | miR-6724-5p/6773-5p | 1 |
| <i>circEP300</i> | miR-6729-3p         | 1 |
| <i>circEP300</i> | miR-6749-3p         | 1 |
| <i>circEP300</i> | miR-676-5p          | 1 |
| <i>circEP300</i> | miR-6762-3p         | 1 |
| <i>circEP300</i> | miR-6780a-3p        | 1 |
| <i>circEP300</i> | miR-6780b-3p        | 1 |
| <i>circEP300</i> | miR-6802-3p         | 1 |
| <i>circEP300</i> | miR-6803-3p         | 1 |
| <i>circEP300</i> | miR-6809-3p         | 1 |
| <i>circEP300</i> | miR-6817-3p         | 1 |
| <i>circEP300</i> | miR-6818-3p         | 1 |
| <i>circEP300</i> | miR-6865-3p         | 1 |

|                    |               |   |
|--------------------|---------------|---|
| <i>circEP300</i>   | miR-6867-3p   | 1 |
| <i>circEP300</i>   | miR-6873-3p   | 1 |
| <i>circEP300</i>   | miR-6881-3p   | 1 |
| <i>circEP300</i>   | miR-6885-3p   | 2 |
| <i>circEP300</i>   | miR-6889-3p   | 1 |
| <i>circEP300</i>   | miR-7110-3p   | 1 |
| <i>circEP300</i>   | miR-7111-3p   | 1 |
| <i>circEP300</i>   | miR-7113-3p   | 1 |
| <i>circEP300</i>   | miR-744-3p    | 1 |
| <i>circEP300</i>   | miR-767-3p    | 1 |
| <i>circEP300</i>   | miR-7703      | 1 |
| <i>circEP300</i>   | miR-7978      | 1 |
| <i>circEP300</i>   | miR-891a-3p   | 1 |
| <i>circEP300</i>   | miR-935       | 1 |
| <i>circEP300</i>   | miR-942-5p    | 1 |
| <i>circEPB41L5</i> | miR-10-5p     | 1 |
| <i>circEPB41L5</i> | miR-1178-3p   | 1 |
| <i>circEPB41L5</i> | miR-1185-5p   | 1 |
| <i>circEPB41L5</i> | miR-1224-5p   | 2 |
| <i>circEPB41L5</i> | miR-1236-3p   | 1 |
| <i>circEPB41L5</i> | miR-1250-3p   | 1 |
| <i>circEPB41L5</i> | miR-1251-5p   | 1 |
| <i>circEPB41L5</i> | miR-125b-1-3p | 2 |
| <i>circEPB41L5</i> | miR-125b-2-3p | 2 |
| <i>circEPB41L5</i> | miR-126-5p    | 4 |
| <i>circEPB41L5</i> | miR-1265      | 1 |
| <i>circEPB41L5</i> | miR-1266-3p   | 1 |
| <i>circEPB41L5</i> | miR-1267      | 1 |
| <i>circEPB41L5</i> | miR-1273g-3p  | 2 |
| <i>circEPB41L5</i> | miR-1273h-3p  | 3 |
| <i>circEPB41L5</i> | miR-1277-5p   | 1 |
| <i>circEPB41L5</i> | miR-1287-3p   | 2 |
| <i>circEPB41L5</i> | miR-129-5p    | 2 |
| <i>circEPB41L5</i> | miR-1295b-3p  | 1 |
| <i>circEPB41L5</i> | miR-1298-5p   | 2 |
| <i>circEPB41L5</i> | miR-1304-5p   | 1 |
| <i>circEPB41L5</i> | miR-1305      | 2 |
| <i>circEPB41L5</i> | miR-130b-5p   | 2 |

|                    |                                     |   |
|--------------------|-------------------------------------|---|
| <i>circEPB41L5</i> | miR-1323                            | 1 |
| <i>circEPB41L5</i> | miR-1324                            | 2 |
| <i>circEPB41L5</i> | miR-133a-5p                         | 4 |
| <i>circEPB41L5</i> | miR-135a-3p                         | 2 |
| <i>circEPB41L5</i> | miR-138-5p                          | 4 |
| <i>circEPB41L5</i> | miR-140-3p.2                        | 1 |
| <i>circEPB41L5</i> | miR-148a-5p                         | 2 |
| <i>circEPB41L5</i> | miR-149-5p                          | 1 |
| <i>circEPB41L5</i> | miR-152-5p                          | 2 |
| <i>circEPB41L5</i> | miR-153-3p                          | 1 |
| <i>circEPB41L5</i> | miR-1537-5p                         | 1 |
| <i>circEPB41L5</i> | miR-154-3p/487-3p                   | 2 |
| <i>circEPB41L5</i> | miR-154-5p                          | 2 |
| <i>circEPB41L5</i> | miR-15b-3p                          | 1 |
| <i>circEPB41L5</i> | miR-16-2-3p/195-3p                  | 1 |
| <i>circEPB41L5</i> | miR-182-3p                          | 2 |
| <i>circEPB41L5</i> | miR-183-5p.2                        | 3 |
| <i>circEPB41L5</i> | miR-186-5p                          | 3 |
| <i>circEPB41L5</i> | miR-1914-5p                         | 1 |
| <i>circEPB41L5</i> | miR-192-3p                          | 1 |
| <i>circEPB41L5</i> | miR-192-5p/215-5p                   | 1 |
| <i>circEPB41L5</i> | miR-197-3p                          | 3 |
| <i>circEPB41L5</i> | miR-1976                            | 3 |
| <i>circEPB41L5</i> | miR-203b-3p                         | 1 |
| <i>circEPB41L5</i> | miR-205-5p                          | 1 |
| <i>circEPB41L5</i> | miR-2114-5p                         | 1 |
| <i>circEPB41L5</i> | miR-2116-5p                         | 1 |
| <i>circEPB41L5</i> | miR-214-5p                          | 1 |
| <i>circEPB41L5</i> | miR-216b-3p                         | 1 |
| <i>circEPB41L5</i> | miR-218-1-3p                        | 2 |
| <i>circEPB41L5</i> | miR-218-2-3p                        | 2 |
| <i>circEPB41L5</i> | miR-218-5p                          | 1 |
| <i>circEPB41L5</i> | miR-22-3p                           | 1 |
| <i>circEPB41L5</i> | miR-22-5p                           | 1 |
| <i>circEPB41L5</i> | miR-221-5p/8073                     | 1 |
| <i>circEPB41L5</i> | miR-223-5p                          | 1 |
| <i>circEPB41L5</i> | miR-25-3p/32-5p/92-3p/363-3p/367-3p | 1 |
| <i>circEPB41L5</i> | miR-2681-5p                         | 1 |

|                    |                     |   |
|--------------------|---------------------|---|
| <i>circEPB41L5</i> | miR-29b-2-5p        | 1 |
| <i>circEPB41L5</i> | miR-30-3p           | 1 |
| <i>circEPB41L5</i> | miR-301a-5p/301b-5p | 1 |
| <i>circEPB41L5</i> | miR-302a-5p         | 2 |
| <i>circEPB41L5</i> | miR-302f            | 1 |
| <i>circEPB41L5</i> | miR-3065-5p         | 1 |
| <i>circEPB41L5</i> | miR-3074-3p         | 1 |
| <i>circEPB41L5</i> | miR-3119            | 1 |
| <i>circEPB41L5</i> | miR-3121-3p         | 1 |
| <i>circEPB41L5</i> | miR-3128            | 1 |
| <i>circEPB41L5</i> | miR-3133            | 3 |
| <i>circEPB41L5</i> | miR-3140-3p         | 2 |
| <i>circEPB41L5</i> | miR-3144-5p         | 1 |
| <i>circEPB41L5</i> | miR-3146            | 2 |
| <i>circEPB41L5</i> | miR-3148            | 1 |
| <i>circEPB41L5</i> | miR-3152-3p         | 1 |
| <i>circEPB41L5</i> | miR-3156-5p         | 1 |
| <i>circEPB41L5</i> | miR-3157-5p         | 1 |
| <i>circEPB41L5</i> | miR-3163            | 3 |
| <i>circEPB41L5</i> | miR-3166            | 2 |
| <i>circEPB41L5</i> | miR-3169            | 2 |
| <i>circEPB41L5</i> | miR-3185            | 1 |
| <i>circEPB41L5</i> | miR-3191-3p         | 1 |
| <i>circEPB41L5</i> | miR-32-3p           | 2 |
| <i>circEPB41L5</i> | miR-3200-5p         | 1 |
| <i>circEPB41L5</i> | miR-320e            | 2 |
| <i>circEPB41L5</i> | miR-338-5p          | 3 |
| <i>circEPB41L5</i> | miR-340-5p          | 2 |
| <i>circEPB41L5</i> | miR-3605-5p         | 1 |
| <i>circEPB41L5</i> | miR-3613-3p         | 3 |
| <i>circEPB41L5</i> | miR-3614-3p         | 1 |
| <i>circEPB41L5</i> | miR-3620-3p         | 1 |
| <i>circEPB41L5</i> | miR-3622a-5p        | 1 |
| <i>circEPB41L5</i> | miR-3651            | 1 |
| <i>circEPB41L5</i> | miR-3653-3p         | 1 |
| <i>circEPB41L5</i> | miR-3653-5p         | 3 |
| <i>circEPB41L5</i> | miR-3662            | 4 |
| <i>circEPB41L5</i> | miR-3664-5p         | 3 |



|                    |                           |   |
|--------------------|---------------------------|---|
| <i>circEPB41L5</i> | miR-3667-3p               | 3 |
| <i>circEPB41L5</i> | miR-367-5p                | 1 |
| <i>circEPB41L5</i> | miR-3672/6864-3p          | 1 |
| <i>circEPB41L5</i> | miR-3675-3p               | 2 |
| <i>circEPB41L5</i> | miR-3678-3p               | 3 |
| <i>circEPB41L5</i> | miR-3686                  | 1 |
| <i>circEPB41L5</i> | miR-3691-3p               | 1 |
| <i>circEPB41L5</i> | miR-3692-3p               | 1 |
| <i>circEPB41L5</i> | miR-3692-5p               | 1 |
| <i>circEPB41L5</i> | miR-371-5p                | 1 |
| <i>circEPB41L5</i> | miR-371b-5p/373-5p/616-5p | 1 |
| <i>circEPB41L5</i> | miR-372-5p                | 1 |
| <i>circEPB41L5</i> | miR-376-3p                | 1 |
| <i>circEPB41L5</i> | miR-383-5p.2              | 2 |
| <i>circEPB41L5</i> | miR-3915                  | 2 |
| <i>circEPB41L5</i> | miR-3921/4653-5p          | 1 |
| <i>circEPB41L5</i> | miR-3928-3p               | 2 |
| <i>circEPB41L5</i> | miR-3934-3p               | 2 |
| <i>circEPB41L5</i> | miR-3938                  | 1 |
| <i>circEPB41L5</i> | miR-3942-3p               | 1 |
| <i>circEPB41L5</i> | miR-3978                  | 1 |
| <i>circEPB41L5</i> | miR-410-3p                | 1 |
| <i>circEPB41L5</i> | miR-4251                  | 2 |
| <i>circEPB41L5</i> | miR-4261                  | 1 |
| <i>circEPB41L5</i> | miR-4268                  | 2 |
| <i>circEPB41L5</i> | miR-4273/7156-5p          | 1 |
| <i>circEPB41L5</i> | miR-4277                  | 1 |
| <i>circEPB41L5</i> | miR-4279                  | 1 |
| <i>circEPB41L5</i> | miR-4282                  | 1 |
| <i>circEPB41L5</i> | miR-4291                  | 2 |
| <i>circEPB41L5</i> | miR-4292/6791-5p          | 1 |
| <i>circEPB41L5</i> | miR-4293                  | 2 |
| <i>circEPB41L5</i> | miR-4299                  | 4 |
| <i>circEPB41L5</i> | miR-4303                  | 3 |
| <i>circEPB41L5</i> | miR-4308                  | 1 |
| <i>circEPB41L5</i> | miR-431-5p                | 1 |
| <i>circEPB41L5</i> | miR-4312                  | 1 |
| <i>circEPB41L5</i> | miR-4325                  | 1 |

|                    |                     |   |
|--------------------|---------------------|---|
| <i>circEPB41L5</i> | miR-4327            | 1 |
| <i>circEPB41L5</i> | miR-4329            | 2 |
| <i>circEPB41L5</i> | miR-4423-3p         | 1 |
| <i>circEPB41L5</i> | miR-4426/4647/4662b | 2 |
| <i>circEPB41L5</i> | miR-4427            | 3 |
| <i>circEPB41L5</i> | miR-4433a-5p        | 2 |
| <i>circEPB41L5</i> | miR-4436b-5p        | 1 |
| <i>circEPB41L5</i> | miR-4443            | 1 |
| <i>circEPB41L5</i> | miR-4448            | 2 |
| <i>circEPB41L5</i> | miR-4453/4538       | 1 |
| <i>circEPB41L5</i> | miR-4456            | 4 |
| <i>circEPB41L5</i> | miR-4475            | 1 |
| <i>circEPB41L5</i> | miR-448             | 1 |
| <i>circEPB41L5</i> | miR-4482-3p         | 1 |
| <i>circEPB41L5</i> | miR-4496            | 1 |
| <i>circEPB41L5</i> | miR-4509            | 1 |
| <i>circEPB41L5</i> | miR-4511            | 1 |
| <i>circEPB41L5</i> | miR-4524a-3p        | 1 |
| <i>circEPB41L5</i> | miR-4524b-3p        | 1 |
| <i>circEPB41L5</i> | miR-4539            | 1 |
| <i>circEPB41L5</i> | miR-4540            | 1 |
| <i>circEPB41L5</i> | miR-4639-5p         | 2 |
| <i>circEPB41L5</i> | miR-4645-3p         | 2 |
| <i>circEPB41L5</i> | miR-4649-3p         | 2 |
| <i>circEPB41L5</i> | miR-4652-5p         | 1 |
| <i>circEPB41L5</i> | miR-4655-5p         | 2 |
| <i>circEPB41L5</i> | miR-4662-5p         | 2 |
| <i>circEPB41L5</i> | miR-4677-5p         | 1 |
| <i>circEPB41L5</i> | miR-4680-3p         | 3 |
| <i>circEPB41L5</i> | miR-4680-5p         | 1 |
| <i>circEPB41L5</i> | miR-4684-5p         | 1 |
| <i>circEPB41L5</i> | miR-4685-5p/6837-5p | 1 |
| <i>circEPB41L5</i> | miR-4689/6858-5p    | 2 |
| <i>circEPB41L5</i> | miR-4694-5p         | 3 |
| <i>circEPB41L5</i> | miR-4696            | 1 |
| <i>circEPB41L5</i> | miR-4698            | 3 |
| <i>circEPB41L5</i> | miR-4699-5p         | 2 |
| <i>circEPB41L5</i> | miR-4700-3p         | 1 |

|                    |                             |   |
|--------------------|-----------------------------|---|
| <i>circEPB41L5</i> | miR-4709-3p                 | 1 |
| <i>circEPB41L5</i> | miR-4714-5p                 | 3 |
| <i>circEPB41L5</i> | miR-4717-3p                 | 1 |
| <i>circEPB41L5</i> | miR-4718                    | 1 |
| <i>circEPB41L5</i> | miR-4720-5p/4799-3p/5588-5p | 1 |
| <i>circEPB41L5</i> | miR-4724-5p                 | 1 |
| <i>circEPB41L5</i> | miR-4735-5p                 | 1 |
| <i>circEPB41L5</i> | miR-4742-3p                 | 2 |
| <i>circEPB41L5</i> | miR-4744                    | 1 |
| <i>circEPB41L5</i> | miR-4753-3p                 | 1 |
| <i>circEPB41L5</i> | miR-4759                    | 2 |
| <i>circEPB41L5</i> | miR-4762-3p                 | 2 |
| <i>circEPB41L5</i> | miR-4764-3p                 | 2 |
| <i>circEPB41L5</i> | miR-4769-3p/6817-5p         | 1 |
| <i>circEPB41L5</i> | miR-4771                    | 2 |
| <i>circEPB41L5</i> | miR-4773                    | 3 |
| <i>circEPB41L5</i> | miR-4775                    | 1 |
| <i>circEPB41L5</i> | miR-4777-5p                 | 1 |
| <i>circEPB41L5</i> | miR-4795-3p                 | 1 |
| <i>circEPB41L5</i> | miR-483-3p.1                | 1 |
| <i>circEPB41L5</i> | miR-493-3p                  | 2 |
| <i>circEPB41L5</i> | miR-494-3p                  | 1 |
| <i>circEPB41L5</i> | miR-495-3p                  | 2 |
| <i>circEPB41L5</i> | miR-4999-5p                 | 1 |
| <i>circEPB41L5</i> | miR-5000-3p                 | 3 |
| <i>circEPB41L5</i> | miR-5000-5p                 | 2 |
| <i>circEPB41L5</i> | miR-5002-5p                 | 3 |
| <i>circEPB41L5</i> | miR-5008-3p/6737-3p/7157-3p | 1 |
| <i>circEPB41L5</i> | miR-504-5p.1                | 1 |
| <i>circEPB41L5</i> | miR-506-5p                  | 5 |
| <i>circEPB41L5</i> | miR-510-3p                  | 1 |
| <i>circEPB41L5</i> | miR-5100                    | 2 |
| <i>circEPB41L5</i> | miR-513c-5p/514b-5p         | 4 |
| <i>circEPB41L5</i> | miR-514a-5p                 | 3 |
| <i>circEPB41L5</i> | miR-517-5p                  | 1 |
| <i>circEPB41L5</i> | miR-5187-3p                 | 3 |
| <i>circEPB41L5</i> | miR-518d-5p/519-5p          | 1 |
| <i>circEPB41L5</i> | miR-539-3p                  | 1 |

|                    |                                                                  |   |
|--------------------|------------------------------------------------------------------|---|
| <i>circEPB41L5</i> | miR-548ac/548bb-3p/548d-3p/548h-3p/548z                          |   |
| <i>circEPB41L5</i> | miR-548aq-3p/548am-3p/548aj-3p/548ah23p/548ae-3p/548j-3p/548x-3p |   |
| <i>circEPB41L5</i> | miR-548az-3p/548ar-3p/548a-3p/548e-3p/548f-3p                    |   |
| <i>circEPB41L5</i> | miR-548b-3p                                                      | 1 |
| <i>circEPB41L5</i> | miR-548c-3p                                                      | 2 |
| <i>circEPB41L5</i> | miR-548g-3p                                                      | 3 |
| <i>circEPB41L5</i> | miR-548q                                                         | 4 |
| <i>circEPB41L5</i> | miR-548u/7161-5p                                                 | 1 |
| <i>circEPB41L5</i> | miR-552-5p                                                       | 2 |
| <i>circEPB41L5</i> | miR-5571-5p                                                      | 2 |
| <i>circEPB41L5</i> | miR-5580-5p                                                      | 1 |
| <i>circEPB41L5</i> | miR-5582-3p                                                      | 3 |
| <i>circEPB41L5</i> | miR-5582-5p                                                      | 1 |
| <i>circEPB41L5</i> | miR-5585-3p                                                      | 1 |
| <i>circEPB41L5</i> | miR-5588-3p                                                      | 1 |
| <i>circEPB41L5</i> | miR-564                                                          | 1 |
| <i>circEPB41L5</i> | miR-5692a                                                        | 3 |
| <i>circEPB41L5</i> | miR-5694                                                         | 2 |
| <i>circEPB41L5</i> | miR-575/4676-5p                                                  | 1 |
| <i>circEPB41L5</i> | miR-577                                                          | 2 |
| <i>circEPB41L5</i> | miR-580-3p                                                       | 1 |
| <i>circEPB41L5</i> | miR-584-3p                                                       | 1 |
| <i>circEPB41L5</i> | miR-586                                                          | 1 |
| <i>circEPB41L5</i> | miR-587                                                          | 5 |
| <i>circEPB41L5</i> | miR-590-3p                                                       | 3 |
| <i>circEPB41L5</i> | miR-596                                                          | 2 |
| <i>circEPB41L5</i> | miR-597-3p                                                       | 2 |
| <i>circEPB41L5</i> | miR-607                                                          | 3 |
| <i>circEPB41L5</i> | miR-6124                                                         | 1 |
| <i>circEPB41L5</i> | miR-6131                                                         | 4 |
| <i>circEPB41L5</i> | miR-616-3p                                                       | 2 |
| <i>circEPB41L5</i> | miR-618                                                          | 2 |
| <i>circEPB41L5</i> | miR-622                                                          | 3 |
| <i>circEPB41L5</i> | miR-624-3p                                                       | 1 |
| <i>circEPB41L5</i> | miR-625-3p                                                       | 1 |
| <i>circEPB41L5</i> | miR-630                                                          | 2 |
| <i>circEPB41L5</i> | miR-641/3617-5p                                                  | 1 |
| <i>circEPB41L5</i> | miR-6503-3p                                                      | 1 |

|                    |                  |   |
|--------------------|------------------|---|
| <i>circEPB41L5</i> | miR-6507-5p      | 2 |
| <i>circEPB41L5</i> | miR-6509-3p      | 1 |
| <i>circEPB41L5</i> | miR-651-3p       | 1 |
| <i>circEPB41L5</i> | miR-6515-3p      | 1 |
| <i>circEPB41L5</i> | miR-6515-5p      | 1 |
| <i>circEPB41L5</i> | miR-6516-5p      | 1 |
| <i>circEPB41L5</i> | miR-652-5p       | 1 |
| <i>circEPB41L5</i> | miR-659-3p       | 3 |
| <i>circEPB41L5</i> | miR-664a-5p/4794 | 1 |
| <i>circEPB41L5</i> | miR-6723-5p      | 1 |
| <i>circEPB41L5</i> | miR-6732-3p      | 1 |
| <i>circEPB41L5</i> | miR-6734-3p      | 3 |
| <i>circEPB41L5</i> | miR-6753-5p      | 1 |
| <i>circEPB41L5</i> | miR-676-5p       | 1 |
| <i>circEPB41L5</i> | miR-6761-5p      | 2 |
| <i>circEPB41L5</i> | miR-6783-5p      | 2 |
| <i>circEPB41L5</i> | miR-6787-3p      | 1 |
| <i>circEPB41L5</i> | miR-6790-3p      | 1 |
| <i>circEPB41L5</i> | miR-6798-5p      | 1 |
| <i>circEPB41L5</i> | miR-6800-3p      | 1 |
| <i>circEPB41L5</i> | miR-6811-3p      | 1 |
| <i>circEPB41L5</i> | miR-6816-3p      | 1 |
| <i>circEPB41L5</i> | miR-6821-3p      | 1 |
| <i>circEPB41L5</i> | miR-6826-5p      | 2 |
| <i>circEPB41L5</i> | miR-6830-3p      | 1 |
| <i>circEPB41L5</i> | miR-6830-5p      | 1 |
| <i>circEPB41L5</i> | miR-6858-3p      | 1 |
| <i>circEPB41L5</i> | miR-6868-3p      | 3 |
| <i>circEPB41L5</i> | miR-6868-5p      | 1 |
| <i>circEPB41L5</i> | miR-6879-3p      | 1 |
| <i>circEPB41L5</i> | miR-6882-3p      | 1 |
| <i>circEPB41L5</i> | miR-6882-5p      | 1 |
| <i>circEPB41L5</i> | miR-6889-3p      | 1 |
| <i>circEPB41L5</i> | miR-6890-3p      | 1 |
| <i>circEPB41L5</i> | miR-6894-5p      | 1 |
| <i>circEPB41L5</i> | miR-7-3p         | 1 |
| <i>circEPB41L5</i> | miR-7113-5p      | 1 |
| <i>circEPB41L5</i> | miR-7151-5p      | 1 |

|                    |                       |   |
|--------------------|-----------------------|---|
| <i>circEPB41L5</i> | miR-7154-3p           | 1 |
| <i>circEPB41L5</i> | miR-7158-3p           | 1 |
| <i>circEPB41L5</i> | miR-7159-3p           | 1 |
| <i>circEPB41L5</i> | miR-7162-3p           | 2 |
| <i>circEPB41L5</i> | miR-765               | 1 |
| <i>circEPB41L5</i> | miR-766-5p            | 1 |
| <i>circEPB41L5</i> | miR-7703              | 1 |
| <i>circEPB41L5</i> | miR-7844-5p           | 2 |
| <i>circEPB41L5</i> | miR-7845-5p           | 1 |
| <i>circEPB41L5</i> | miR-7849-3p           | 1 |
| <i>circEPB41L5</i> | miR-7850-5p           | 1 |
| <i>circEPB41L5</i> | miR-7977              | 2 |
| <i>circEPB41L5</i> | miR-7978              | 4 |
| <i>circEPB41L5</i> | miR-8055              | 1 |
| <i>circEPB41L5</i> | miR-8063              | 3 |
| <i>circEPB41L5</i> | miR-8069              | 1 |
| <i>circEPB41L5</i> | miR-8080              | 1 |
| <i>circEPB41L5</i> | miR-8083              | 2 |
| <i>circEPB41L5</i> | miR-873-5p.1          | 1 |
| <i>circEPB41L5</i> | miR-892-5p            | 5 |
| <i>circEPB41L5</i> | miR-892b              | 5 |
| <i>circEPB41L5</i> | miR-93-3p             | 1 |
| <i>circEPB41L5</i> | miR-935               | 1 |
| <i>circEPB41L5</i> | let-7a-2-3p/let-7g-3p | 1 |
| <i>circEPB41L5</i> | let-7c-3p             | 1 |
| <i>circEPB41L5</i> | miR-1-3p/206          | 4 |
| <i>circEPB41L5</i> | miR-100-3p            | 3 |
| <i>circEPB41L5</i> | miR-101-3p.1          | 1 |
| <i>circEPB41L5</i> | miR-103-3p/107        | 1 |
| <i>circEPB41L5</i> | miR-103a-2-5p         | 3 |
| <i>circEPB41L5</i> | miR-1179              | 3 |
| <i>circEPB41L5</i> | miR-1180-5p           | 1 |
| <i>circEPB41L5</i> | miR-1197              | 1 |
| <i>circEPB41L5</i> | miR-1200              | 3 |
| <i>circEPB41L5</i> | miR-1207-5p/4763-3p   | 3 |
| <i>circEPB41L5</i> | miR-1208              | 3 |
| <i>circEPB41L5</i> | miR-1225-3p           | 1 |
| <i>circEPB41L5</i> | miR-1233-5p/6778-5p   | 1 |

|                    |                          |   |
|--------------------|--------------------------|---|
| <i>circEPB41L5</i> | miR-1238-3p              | 1 |
| <i>circEPB41L5</i> | miR-124-3p.1             | 3 |
| <i>circEPB41L5</i> | miR-124-3p.2/506-3p      | 1 |
| <i>circEPB41L5</i> | miR-124-5p               | 4 |
| <i>circEPB41L5</i> | miR-1245b-3p             | 3 |
| <i>circEPB41L5</i> | miR-1246                 | 1 |
| <i>circEPB41L5</i> | miR-1249-5p/6797-5p      | 2 |
| <i>circEPB41L5</i> | miR-1252-3p              | 1 |
| <i>circEPB41L5</i> | miR-1253                 | 1 |
| <i>circEPB41L5</i> | miR-1254/3116            | 2 |
| <i>circEPB41L5</i> | miR-1255b-2-3p           | 6 |
| <i>circEPB41L5</i> | miR-1256                 | 2 |
| <i>circEPB41L5</i> | miR-125a-3p              | 2 |
| <i>circEPB41L5</i> | miR-1264                 | 2 |
| <i>circEPB41L5</i> | miR-127-3p               | 2 |
| <i>circEPB41L5</i> | miR-1270                 | 3 |
| <i>circEPB41L5</i> | miR-1272                 | 1 |
| <i>circEPB41L5</i> | miR-1273e                | 2 |
| <i>circEPB41L5</i> | miR-1273f                | 3 |
| <i>circEPB41L5</i> | miR-1275/4665-5p         | 2 |
| <i>circEPB41L5</i> | miR-1279                 | 4 |
| <i>circEPB41L5</i> | miR-1283                 | 2 |
| <i>circEPB41L5</i> | miR-1284                 | 1 |
| <i>circEPB41L5</i> | miR-1285-5p              | 1 |
| <i>circEPB41L5</i> | miR-1286                 | 1 |
| <i>circEPB41L5</i> | miR-1287-5p              | 2 |
| <i>circEPB41L5</i> | miR-1288-3p              | 1 |
| <i>circEPB41L5</i> | miR-1290                 | 1 |
| <i>circEPB41L5</i> | miR-1291/6775-3p         | 2 |
| <i>circEPB41L5</i> | miR-1294                 | 1 |
| <i>circEPB41L5</i> | miR-130-3p/301-3p/454-3p | 1 |
| <i>circEPB41L5</i> | miR-1302/4298            | 1 |
| <i>circEPB41L5</i> | miR-1303                 | 1 |
| <i>circEPB41L5</i> | miR-132-3p/212-3p        | 1 |
| <i>circEPB41L5</i> | miR-1322                 | 1 |
| <i>circEPB41L5</i> | miR-1343-3p              | 2 |
| <i>circEPB41L5</i> | miR-135b-3p              | 2 |
| <i>circEPB41L5</i> | miR-136-5p               | 1 |

|                    |                                    |   |
|--------------------|------------------------------------|---|
| <i>circEPB41L5</i> | miR-138-1-3p                       | 2 |
| <i>circEPB41L5</i> | miR-139-5p                         | 2 |
| <i>circEPB41L5</i> | miR-141-3p/200-3p                  | 1 |
| <i>circEPB41L5</i> | miR-142-3p.2                       | 2 |
| <i>circEPB41L5</i> | miR-143-3p                         | 3 |
| <i>circEPB41L5</i> | miR-144-3p                         | 1 |
| <i>circEPB41L5</i> | miR-145-5p                         | 1 |
| <i>circEPB41L5</i> | miR-1470                           | 3 |
| <i>circEPB41L5</i> | miR-147a                           | 1 |
| <i>circEPB41L5</i> | miR-148-3p/152-3p                  | 2 |
| <i>circEPB41L5</i> | miR-149-3p/4728-5p/6785-5p/6883-5p | 2 |
| <i>circEPB41L5</i> | miR-153-5p                         | 2 |
| <i>circEPB41L5</i> | miR-1587/3620-5p                   | 3 |
| <i>circEPB41L5</i> | miR-16-1-3p                        | 1 |
| <i>circEPB41L5</i> | miR-181-3p/4420                    | 1 |
| <i>circEPB41L5</i> | miR-181-5p                         | 1 |
| <i>circEPB41L5</i> | miR-181c-3p                        | 1 |
| <i>circEPB41L5</i> | miR-181d-3p                        | 1 |
| <i>circEPB41L5</i> | miR-182-5p                         | 1 |
| <i>circEPB41L5</i> | miR-183-3p                         | 1 |
| <i>circEPB41L5</i> | miR-183-5p.1                       | 3 |
| <i>circEPB41L5</i> | miR-184                            | 2 |
| <i>circEPB41L5</i> | miR-185-3p                         | 1 |
| <i>circEPB41L5</i> | miR-185-5p                         | 4 |
| <i>circEPB41L5</i> | miR-186-3p                         | 2 |
| <i>circEPB41L5</i> | miR-187-5p                         | 2 |
| <i>circEPB41L5</i> | miR-19-3p                          | 2 |
| <i>circEPB41L5</i> | miR-191-5p                         | 2 |
| <i>circEPB41L5</i> | miR-1910-3p/6511a-5p               | 1 |
| <i>circEPB41L5</i> | miR-1915-3p/6764-5p                | 2 |
| <i>circEPB41L5</i> | miR-194-3p                         | 2 |
| <i>circEPB41L5</i> | miR-196b-3p                        | 2 |
| <i>circEPB41L5</i> | miR-1972                           | 2 |
| <i>circEPB41L5</i> | miR-200ab-5p                       | 2 |
| <i>circEPB41L5</i> | miR-200c-5p/550a-3p                | 1 |
| <i>circEPB41L5</i> | miR-202-3p                         | 2 |
| <i>circEPB41L5</i> | miR-203a-3p.1                      | 1 |
| <i>circEPB41L5</i> | miR-203b-5p/6718-5p                | 2 |



|                    |                                 |   |
|--------------------|---------------------------------|---|
| <i>circEPB41L5</i> | miR-205-3p                      | 5 |
| <i>circEPB41L5</i> | miR-2053                        | 1 |
| <i>circEPB41L5</i> | miR-20b-3p                      | 1 |
| <i>circEPB41L5</i> | miR-211-3p                      | 1 |
| <i>circEPB41L5</i> | miR-2110                        | 2 |
| <i>circEPB41L5</i> | miR-2113                        | 1 |
| <i>circEPB41L5</i> | miR-2114-3p                     | 1 |
| <i>circEPB41L5</i> | miR-2115-3p                     | 2 |
| <i>circEPB41L5</i> | miR-2115-5p                     | 3 |
| <i>circEPB41L5</i> | miR-2117                        | 1 |
| <i>circEPB41L5</i> | miR-215-3p                      | 3 |
| <i>circEPB41L5</i> | miR-221-3p/222-3p               | 4 |
| <i>circEPB41L5</i> | miR-222-5p                      | 2 |
| <i>circEPB41L5</i> | miR-223-3p                      | 2 |
| <i>circEPB41L5</i> | miR-224-5p                      | 2 |
| <i>circEPB41L5</i> | miR-2276-5p                     | 1 |
| <i>circEPB41L5</i> | miR-2277-3p                     | 2 |
| <i>circEPB41L5</i> | miR-23-3p                       | 4 |
| <i>circEPB41L5</i> | miR-23-5p                       | 2 |
| <i>circEPB41L5</i> | miR-2392                        | 1 |
| <i>circEPB41L5</i> | miR-26-3p                       | 2 |
| <i>circEPB41L5</i> | miR-2681-3p                     | 2 |
| <i>circEPB41L5</i> | miR-26b-3p                      | 1 |
| <i>circEPB41L5</i> | miR-27-3p                       | 2 |
| <i>circEPB41L5</i> | miR-27a-5p                      | 1 |
| <i>circEPB41L5</i> | miR-27b-5p                      | 1 |
| <i>circEPB41L5</i> | miR-299-3p                      | 1 |
| <i>circEPB41L5</i> | miR-29a-5p                      | 1 |
| <i>circEPB41L5</i> | miR-30-5p                       | 2 |
| <i>circEPB41L5</i> | miR-302-3p/372-3p/373-3p/520-3p | 1 |
| <i>circEPB41L5</i> | miR-302b-5p/302d-5p             | 1 |
| <i>circEPB41L5</i> | miR-302c-3p.2/520-3p            | 2 |
| <i>circEPB41L5</i> | miR-302c-5p                     | 3 |
| <i>circEPB41L5</i> | miR-3064-5p                     | 1 |
| <i>circEPB41L5</i> | miR-3065-3p                     | 2 |
| <i>circEPB41L5</i> | miR-31-5p                       | 1 |
| <i>circEPB41L5</i> | miR-3117-3p                     | 1 |
| <i>circEPB41L5</i> | miR-3120-3p                     | 6 |

|                    |                          |   |
|--------------------|--------------------------|---|
| <i>circEPB41L5</i> | miR-3122/3913-5p         | 2 |
| <i>circEPB41L5</i> | miR-3125/3916/6859-5p    | 1 |
| <i>circEPB41L5</i> | miR-3127-5p              | 1 |
| <i>circEPB41L5</i> | miR-3135b                | 2 |
| <i>circEPB41L5</i> | miR-3137                 | 1 |
| <i>circEPB41L5</i> | miR-3140-5p              | 3 |
| <i>circEPB41L5</i> | miR-3143                 | 1 |
| <i>circEPB41L5</i> | miR-3150a-3p             | 2 |
| <i>circEPB41L5</i> | miR-3153/6733-5p/6739-5p | 1 |
| <i>circEPB41L5</i> | miR-3158-3p              | 1 |
| <i>circEPB41L5</i> | miR-3159                 | 1 |
| <i>circEPB41L5</i> | miR-3160-3p              | 1 |
| <i>circEPB41L5</i> | miR-3161                 | 2 |
| <i>circEPB41L5</i> | miR-3171                 | 1 |
| <i>circEPB41L5</i> | miR-3174                 | 2 |
| <i>circEPB41L5</i> | miR-3175                 | 4 |
| <i>circEPB41L5</i> | miR-3180-5p              | 2 |
| <i>circEPB41L5</i> | miR-3182                 | 3 |
| <i>circEPB41L5</i> | miR-3184-3p              | 2 |
| <i>circEPB41L5</i> | miR-3189-5p              | 2 |
| <i>circEPB41L5</i> | miR-3190-3p              | 1 |
| <i>circEPB41L5</i> | miR-3191-5p              | 1 |
| <i>circEPB41L5</i> | miR-3202                 | 1 |
| <i>circEPB41L5</i> | miR-323-3p               | 5 |
| <i>circEPB41L5</i> | miR-323b-3p              | 2 |
| <i>circEPB41L5</i> | miR-324-5p               | 2 |
| <i>circEPB41L5</i> | miR-325                  | 1 |
| <i>circEPB41L5</i> | miR-329-3p/362-3p        | 1 |
| <i>circEPB41L5</i> | miR-329-5p               | 1 |
| <i>circEPB41L5</i> | miR-330-3p.2             | 3 |
| <i>circEPB41L5</i> | miR-335-3p               | 1 |
| <i>circEPB41L5</i> | miR-335-5p               | 3 |
| <i>circEPB41L5</i> | miR-339-5p               | 3 |
| <i>circEPB41L5</i> | miR-33a-3p               | 2 |
| <i>circEPB41L5</i> | miR-342-5p/4664-5p       | 1 |
| <i>circEPB41L5</i> | miR-345-3p               | 3 |
| <i>circEPB41L5</i> | miR-34b-3p               | 1 |
| <i>circEPB41L5</i> | miR-34b-5p/449c-5p       | 1 |

|                    |                                   |   |
|--------------------|-----------------------------------|---|
| <i>circEPB41L5</i> | miR-34c-3p                        | 1 |
| <i>circEPB41L5</i> | miR-3607-3p                       | 2 |
| <i>circEPB41L5</i> | miR-3616-3p                       | 1 |
| <i>circEPB41L5</i> | miR-3619-3p                       | 1 |
| <i>circEPB41L5</i> | miR-3622a-3p/3622b-3p             | 1 |
| <i>circEPB41L5</i> | miR-3646                          | 1 |
| <i>circEPB41L5</i> | miR-3649                          | 1 |
| <i>circEPB41L5</i> | miR-3650                          | 3 |
| <i>circEPB41L5</i> | miR-3663-5p                       | 2 |
| <i>circEPB41L5</i> | miR-3665                          | 2 |
| <i>circEPB41L5</i> | miR-3668                          | 2 |
| <i>circEPB41L5</i> | miR-3670                          | 2 |
| <i>circEPB41L5</i> | miR-3679-3p                       | 2 |
| <i>circEPB41L5</i> | miR-3688-3p                       | 1 |
| <i>circEPB41L5</i> | miR-3688-5p                       | 1 |
| <i>circEPB41L5</i> | miR-3689a-5p/3689b-5p/3689e/3689f | 2 |
| <i>circEPB41L5</i> | miR-3689d/6851-5p                 | 1 |
| <i>circEPB41L5</i> | miR-3714                          | 3 |
| <i>circEPB41L5</i> | miR-374-5p                        | 1 |
| <i>circEPB41L5</i> | miR-376a-2-5p                     | 1 |
| <i>circEPB41L5</i> | miR-376a-5p                       | 1 |
| <i>circEPB41L5</i> | miR-377-5p/6086                   | 1 |
| <i>circEPB41L5</i> | miR-378a-5p                       | 3 |
| <i>circEPB41L5</i> | miR-378g                          | 3 |
| <i>circEPB41L5</i> | miR-380-3p                        | 2 |
| <i>circEPB41L5</i> | miR-382-5p                        | 1 |
| <i>circEPB41L5</i> | miR-383-3p                        | 2 |
| <i>circEPB41L5</i> | miR-383-5p.1                      | 2 |
| <i>circEPB41L5</i> | miR-3910                          | 3 |
| <i>circEPB41L5</i> | miR-3913-3p                       | 1 |
| <i>circEPB41L5</i> | miR-3914                          | 1 |
| <i>circEPB41L5</i> | miR-3920                          | 1 |
| <i>circEPB41L5</i> | miR-3922-5p                       | 1 |
| <i>circEPB41L5</i> | miR-3923                          | 1 |
| <i>circEPB41L5</i> | miR-3925-3p                       | 1 |
| <i>circEPB41L5</i> | miR-3928-5p/6806-3p               | 1 |
| <i>circEPB41L5</i> | miR-3934-5p                       | 2 |
| <i>circEPB41L5</i> | miR-3945                          | 1 |

|                    |                                              |   |
|--------------------|----------------------------------------------|---|
| <i>circEPB41L5</i> | miR-3977                                     | 4 |
| <i>circEPB41L5</i> | miR-409-3p                                   | 1 |
| <i>circEPB41L5</i> | miR-412-3p/6754-3p                           | 1 |
| <i>circEPB41L5</i> | miR-423-5p                                   | 3 |
| <i>circEPB41L5</i> | miR-425-5p                                   | 1 |
| <i>circEPB41L5</i> | miR-4253/6862-5p                             | 1 |
| <i>circEPB41L5</i> | miR-4255                                     | 1 |
| <i>circEPB41L5</i> | miR-4257                                     | 1 |
| <i>circEPB41L5</i> | miR-4260                                     | 2 |
| <i>circEPB41L5</i> | miR-4264                                     | 4 |
| <i>circEPB41L5</i> | miR-4267                                     | 2 |
| <i>circEPB41L5</i> | miR-4269/6715b-5p                            | 1 |
| <i>circEPB41L5</i> | miR-4270/4441/6754-5p                        | 1 |
| <i>circEPB41L5</i> | miR-4271/4725-3p/6780b-5p                    | 1 |
| <i>circEPB41L5</i> | miR-4272                                     | 3 |
| <i>circEPB41L5</i> | miR-4275                                     | 4 |
| <i>circEPB41L5</i> | miR-4276                                     | 7 |
| <i>circEPB41L5</i> | miR-4278                                     | 1 |
| <i>circEPB41L5</i> | miR-4290                                     | 2 |
| <i>circEPB41L5</i> | miR-4297/5581-5p                             | 1 |
| <i>circEPB41L5</i> | miR-4302                                     | 1 |
| <i>circEPB41L5</i> | miR-4307                                     | 3 |
| <i>circEPB41L5</i> | miR-4310/7157-5p                             | 3 |
| <i>circEPB41L5</i> | miR-4314                                     | 2 |
| <i>circEPB41L5</i> | miR-4316                                     | 1 |
| <i>circEPB41L5</i> | miR-4318                                     | 1 |
| <i>circEPB41L5</i> | miR-432-3p                                   | 1 |
| <i>circEPB41L5</i> | miR-4324                                     | 1 |
| <i>circEPB41L5</i> | miR-433-3p                                   | 1 |
| <i>circEPB41L5</i> | miR-4330                                     | 2 |
| <i>circEPB41L5</i> | miR-4421/5699-3p                             | 3 |
| <i>circEPB41L5</i> | miR-4422                                     | 3 |
| <i>circEPB41L5</i> | miR-4432                                     | 1 |
| <i>circEPB41L5</i> | miR-4433a-3p                                 | 1 |
| <i>circEPB41L5</i> | miR-4433b-5p                                 | 3 |
| <i>circEPB41L5</i> | miR-4434/4516/5703                           | 1 |
| <i>circEPB41L5</i> | miR-4436b-3p/4632-5p/6735-5p/6879-5p/7843-5p | 1 |
| <i>circEPB41L5</i> | miR-4437                                     | 1 |

|                    |                       |   |
|--------------------|-----------------------|---|
| <i>circEPB41L5</i> | miR-4438              | 3 |
| <i>circEPB41L5</i> | miR-4446-3p           | 1 |
| <i>circEPB41L5</i> | miR-4452              | 1 |
| <i>circEPB41L5</i> | miR-4455              | 1 |
| <i>circEPB41L5</i> | miR-4457              | 1 |
| <i>circEPB41L5</i> | miR-4459              | 1 |
| <i>circEPB41L5</i> | miR-4474-3p           | 1 |
| <i>circEPB41L5</i> | miR-4476/6876-5p      | 2 |
| <i>circEPB41L5</i> | miR-4477a             | 1 |
| <i>circEPB41L5</i> | miR-4477b             | 1 |
| <i>circEPB41L5</i> | miR-4484              | 1 |
| <i>circEPB41L5</i> | miR-4486              | 3 |
| <i>circEPB41L5</i> | miR-4487              | 1 |
| <i>circEPB41L5</i> | miR-4491/4657         | 1 |
| <i>circEPB41L5</i> | miR-4495              | 2 |
| <i>circEPB41L5</i> | miR-4502              | 1 |
| <i>circEPB41L5</i> | miR-4506              | 1 |
| <i>circEPB41L5</i> | miR-450a-1-3p         | 2 |
| <i>circEPB41L5</i> | miR-450a-2-3p         | 2 |
| <i>circEPB41L5</i> | miR-450b-3p/769-3p    | 2 |
| <i>circEPB41L5</i> | miR-4514/4692         | 1 |
| <i>circEPB41L5</i> | miR-4515              | 1 |
| <i>circEPB41L5</i> | miR-452-3p            | 2 |
| <i>circEPB41L5</i> | miR-452-5p/892-3p     | 2 |
| <i>circEPB41L5</i> | miR-4520-3p           | 2 |
| <i>circEPB41L5</i> | miR-4522              | 3 |
| <i>circEPB41L5</i> | miR-4528              | 3 |
| <i>circEPB41L5</i> | miR-4531              | 3 |
| <i>circEPB41L5</i> | miR-4533              | 1 |
| <i>circEPB41L5</i> | miR-4635              | 1 |
| <i>circEPB41L5</i> | miR-4639-3p           | 3 |
| <i>circEPB41L5</i> | miR-4642              | 1 |
| <i>circEPB41L5</i> | miR-4648              | 1 |
| <i>circEPB41L5</i> | miR-4650-5p           | 2 |
| <i>circEPB41L5</i> | miR-4654/4769-5p      | 1 |
| <i>circEPB41L5</i> | miR-4659a-3p/4659b-3p | 1 |
| <i>circEPB41L5</i> | miR-466               | 1 |
| <i>circEPB41L5</i> | miR-4662a-3p          | 3 |

|                    |                                  |   |
|--------------------|----------------------------------|---|
| <i>circEPB41L5</i> | miR-4667-3p                      | 3 |
| <i>circEPB41L5</i> | miR-4667-5p/4700-5p/8089         | 2 |
| <i>circEPB41L5</i> | miR-4668-3p                      | 1 |
| <i>circEPB41L5</i> | miR-4668-5p                      | 1 |
| <i>circEPB41L5</i> | miR-4674                         | 3 |
| <i>circEPB41L5</i> | miR-4678                         | 2 |
| <i>circEPB41L5</i> | miR-4687-3p                      | 1 |
| <i>circEPB41L5</i> | miR-4688/6743-5p                 | 2 |
| <i>circEPB41L5</i> | miR-4691-5p/6792-3p              | 1 |
| <i>circEPB41L5</i> | miR-4694-3p                      | 2 |
| <i>circEPB41L5</i> | miR-4695-5p                      | 1 |
| <i>circEPB41L5</i> | miR-4697-3p                      | 2 |
| <i>circEPB41L5</i> | miR-4699-3p                      | 1 |
| <i>circEPB41L5</i> | miR-4704-3p                      | 1 |
| <i>circEPB41L5</i> | miR-4708-3p                      | 1 |
| <i>circEPB41L5</i> | miR-4708-5p                      | 3 |
| <i>circEPB41L5</i> | miR-4710                         | 1 |
| <i>circEPB41L5</i> | miR-4711-3p                      | 1 |
| <i>circEPB41L5</i> | miR-4711-5p                      | 2 |
| <i>circEPB41L5</i> | miR-4712-3p                      | 1 |
| <i>circEPB41L5</i> | miR-4716-5p                      | 3 |
| <i>circEPB41L5</i> | miR-4721                         | 1 |
| <i>circEPB41L5</i> | miR-4722-5p                      | 1 |
| <i>circEPB41L5</i> | miR-4723-5p/5698/6870-5p/7111-5p | 2 |
| <i>circEPB41L5</i> | miR-4724-3p                      | 1 |
| <i>circEPB41L5</i> | miR-4726-3p                      | 2 |
| <i>circEPB41L5</i> | miR-4727-5p                      | 1 |
| <i>circEPB41L5</i> | miR-4728-3p                      | 4 |
| <i>circEPB41L5</i> | miR-4729                         | 3 |
| <i>circEPB41L5</i> | miR-4731-3p/4801                 | 1 |
| <i>circEPB41L5</i> | miR-4731-5p                      | 2 |
| <i>circEPB41L5</i> | miR-4733-5p                      | 2 |
| <i>circEPB41L5</i> | miR-4734                         | 1 |
| <i>circEPB41L5</i> | miR-4736                         | 3 |
| <i>circEPB41L5</i> | miR-4740-5p                      | 1 |
| <i>circEPB41L5</i> | miR-4742-5p                      | 1 |
| <i>circEPB41L5</i> | miR-4747-3p                      | 2 |
| <i>circEPB41L5</i> | miR-4747-5p/5196-5p              | 1 |

|                    |                     |   |
|--------------------|---------------------|---|
| <i>circEPB41L5</i> | miR-4751            | 1 |
| <i>circEPB41L5</i> | miR-4752            | 1 |
| <i>circEPB41L5</i> | miR-4754            | 1 |
| <i>circEPB41L5</i> | miR-4755-5p/5006-3p | 3 |
| <i>circEPB41L5</i> | miR-4758-3p         | 2 |
| <i>circEPB41L5</i> | miR-4760-3p         | 3 |
| <i>circEPB41L5</i> | miR-4760-5p/8061    | 1 |
| <i>circEPB41L5</i> | miR-4761-3p         | 1 |
| <i>circEPB41L5</i> | miR-4762-5p         | 2 |
| <i>circEPB41L5</i> | miR-4764-5p         | 3 |
| <i>circEPB41L5</i> | miR-4766-5p         | 2 |
| <i>circEPB41L5</i> | miR-4768-3p         | 1 |
| <i>circEPB41L5</i> | miR-4768-5p/6833-3p | 1 |
| <i>circEPB41L5</i> | miR-4772-5p         | 2 |
| <i>circEPB41L5</i> | miR-4778-3p         | 2 |
| <i>circEPB41L5</i> | miR-4779            | 1 |
| <i>circEPB41L5</i> | miR-4781-3p         | 1 |
| <i>circEPB41L5</i> | miR-4786-3p         | 2 |
| <i>circEPB41L5</i> | miR-4790-3p         | 2 |
| <i>circEPB41L5</i> | miR-4792            | 1 |
| <i>circEPB41L5</i> | miR-4793-5p         | 1 |
| <i>circEPB41L5</i> | miR-4795-5p         | 1 |
| <i>circEPB41L5</i> | miR-4797-3p         | 4 |
| <i>circEPB41L5</i> | miR-4802-3p         | 3 |
| <i>circEPB41L5</i> | miR-4802-5p         | 1 |
| <i>circEPB41L5</i> | miR-4803            | 2 |
| <i>circEPB41L5</i> | miR-486-3p          | 2 |
| <i>circEPB41L5</i> | miR-486-5p          | 1 |
| <i>circEPB41L5</i> | miR-489-3p          | 2 |
| <i>circEPB41L5</i> | miR-490-5p          | 1 |
| <i>circEPB41L5</i> | miR-491-3p          | 1 |
| <i>circEPB41L5</i> | miR-492             | 1 |
| <i>circEPB41L5</i> | miR-493-5p          | 1 |
| <i>circEPB41L5</i> | miR-495-5p          | 1 |
| <i>circEPB41L5</i> | miR-499a-3p/499b-3p | 4 |
| <i>circEPB41L5</i> | miR-5001-3p         | 1 |
| <i>circEPB41L5</i> | miR-5004-3p         | 1 |
| <i>circEPB41L5</i> | miR-5004-5p         | 1 |

|                    |                             |   |
|--------------------|-----------------------------|---|
| <i>circEPB41L5</i> | miR-5007-3p                 | 2 |
| <i>circEPB41L5</i> | miR-5007-5p                 | 2 |
| <i>circEPB41L5</i> | miR-500a-5p                 | 1 |
| <i>circEPB41L5</i> | miR-501-3p/502-3p           | 1 |
| <i>circEPB41L5</i> | miR-5010-3p                 | 1 |
| <i>circEPB41L5</i> | miR-5010-5p                 | 2 |
| <i>circEPB41L5</i> | miR-504-3p                  | 2 |
| <i>circEPB41L5</i> | miR-505-3p.1                | 1 |
| <i>circEPB41L5</i> | miR-505-5p                  | 1 |
| <i>circEPB41L5</i> | miR-5088-5p                 | 1 |
| <i>circEPB41L5</i> | miR-5089-5p                 | 2 |
| <i>circEPB41L5</i> | miR-5092                    | 1 |
| <i>circEPB41L5</i> | miR-5093                    | 1 |
| <i>circEPB41L5</i> | miR-5094                    | 2 |
| <i>circEPB41L5</i> | miR-5095/7151-3p            | 4 |
| <i>circEPB41L5</i> | miR-5096                    | 3 |
| <i>circEPB41L5</i> | miR-511-5p                  | 2 |
| <i>circEPB41L5</i> | miR-512-3p                  | 2 |
| <i>circEPB41L5</i> | miR-513a-3p/513c-3p/3606-3p | 1 |
| <i>circEPB41L5</i> | miR-513a-5p                 | 2 |
| <i>circEPB41L5</i> | miR-513b-3p                 | 2 |
| <i>circEPB41L5</i> | miR-515-5p/519e-5p          | 1 |
| <i>circEPB41L5</i> | miR-516a-3p/516b-3p/7162-5p | 3 |
| <i>circEPB41L5</i> | miR-5186                    | 2 |
| <i>circEPB41L5</i> | miR-5187-5p                 | 2 |
| <i>circEPB41L5</i> | miR-519-3p                  | 1 |
| <i>circEPB41L5</i> | miR-5190                    | 2 |
| <i>circEPB41L5</i> | miR-5192                    | 4 |
| <i>circEPB41L5</i> | miR-5193                    | 4 |
| <i>circEPB41L5</i> | miR-5194                    | 3 |
| <i>circEPB41L5</i> | miR-5196-3p                 | 1 |
| <i>circEPB41L5</i> | miR-5197-5p                 | 2 |
| <i>circEPB41L5</i> | miR-522-3p                  | 2 |
| <i>circEPB41L5</i> | miR-524-5p                  | 3 |
| <i>circEPB41L5</i> | miR-526b-5p                 | 1 |
| <i>circEPB41L5</i> | miR-543                     | 2 |
| <i>circEPB41L5</i> | miR-544a                    | 2 |
| <i>circEPB41L5</i> | miR-544b                    | 1 |



|                    |                              |   |
|--------------------|------------------------------|---|
| <i>circEPB41L5</i> | miR-545-5p                   | 2 |
| <i>circEPB41L5</i> | miR-548ai/548ag/548ba/570-5p | 2 |
| <i>circEPB41L5</i> | miR-548an                    | 1 |
| <i>circEPB41L5</i> | miR-548at-5p                 | 1 |
| <i>circEPB41L5</i> | miR-548az-5p/548t-5p         | 1 |
| <i>circEPB41L5</i> | miR-548e-5p                  | 3 |
| <i>circEPB41L5</i> | miR-548m                     | 1 |
| <i>circEPB41L5</i> | miR-548n                     | 1 |
| <i>circEPB41L5</i> | miR-548p                     | 3 |
| <i>circEPB41L5</i> | miR-548v                     | 4 |
| <i>circEPB41L5</i> | miR-550b-3p                  | 1 |
| <i>circEPB41L5</i> | miR-551b-5p                  | 3 |
| <i>circEPB41L5</i> | miR-552-3p                   | 1 |
| <i>circEPB41L5</i> | miR-553                      | 2 |
| <i>circEPB41L5</i> | miR-555                      | 1 |
| <i>circEPB41L5</i> | miR-556-3p                   | 3 |
| <i>circEPB41L5</i> | miR-5572                     | 2 |
| <i>circEPB41L5</i> | miR-5579-3p                  | 1 |
| <i>circEPB41L5</i> | miR-558                      | 1 |
| <i>circEPB41L5</i> | miR-5580-3p                  | 2 |
| <i>circEPB41L5</i> | miR-5584-5p                  | 1 |
| <i>circEPB41L5</i> | miR-5587-5p                  | 4 |
| <i>circEPB41L5</i> | miR-5589-3p                  | 2 |
| <i>circEPB41L5</i> | miR-5589-5p                  | 2 |
| <i>circEPB41L5</i> | miR-561-3p                   | 1 |
| <i>circEPB41L5</i> | miR-568                      | 1 |
| <i>circEPB41L5</i> | miR-5681a                    | 2 |
| <i>circEPB41L5</i> | miR-5683                     | 1 |
| <i>circEPB41L5</i> | miR-5684                     | 1 |
| <i>circEPB41L5</i> | miR-5687                     | 2 |
| <i>circEPB41L5</i> | miR-5690                     | 2 |
| <i>circEPB41L5</i> | miR-5693                     | 2 |
| <i>circEPB41L5</i> | miR-5696                     | 2 |
| <i>circEPB41L5</i> | miR-5699-5p                  | 2 |
| <i>circEPB41L5</i> | miR-573/3616-5p              | 1 |
| <i>circEPB41L5</i> | miR-579-3p                   | 2 |
| <i>circEPB41L5</i> | miR-582-3p                   | 1 |
| <i>circEPB41L5</i> | miR-589-3p                   | 2 |

|                    |                                      |   |
|--------------------|--------------------------------------|---|
| <i>circEPB41L5</i> | miR-593-5p                           | 3 |
| <i>circEPB41L5</i> | miR-597-5p                           | 2 |
| <i>circEPB41L5</i> | miR-598-3p                           | 2 |
| <i>circEPB41L5</i> | miR-603                              | 1 |
| <i>circEPB41L5</i> | miR-605-5p                           | 1 |
| <i>circEPB41L5</i> | miR-6071                             | 2 |
| <i>circEPB41L5</i> | miR-6074                             | 5 |
| <i>circEPB41L5</i> | miR-6077                             | 3 |
| <i>circEPB41L5</i> | miR-6079                             | 1 |
| <i>circEPB41L5</i> | miR-608/4651                         | 1 |
| <i>circEPB41L5</i> | miR-6085/6813-5p                     | 2 |
| <i>circEPB41L5</i> | miR-609                              | 1 |
| <i>circEPB41L5</i> | miR-612/1285-3p/3187-5p/5189-5p/6860 | 3 |
| <i>circEPB41L5</i> | miR-6125                             | 2 |
| <i>circEPB41L5</i> | miR-6134                             | 2 |
| <i>circEPB41L5</i> | miR-625-5p                           | 2 |
| <i>circEPB41L5</i> | miR-628-3p                           | 1 |
| <i>circEPB41L5</i> | miR-629-3p                           | 1 |
| <i>circEPB41L5</i> | miR-631/3661                         | 1 |
| <i>circEPB41L5</i> | miR-635/6774-5p                      | 2 |
| <i>circEPB41L5</i> | miR-636                              | 2 |
| <i>circEPB41L5</i> | miR-637                              | 2 |
| <i>circEPB41L5</i> | miR-642-3p                           | 1 |
| <i>circEPB41L5</i> | miR-642a-5p                          | 3 |
| <i>circEPB41L5</i> | miR-642b-5p                          | 2 |
| <i>circEPB41L5</i> | miR-647                              | 1 |
| <i>circEPB41L5</i> | miR-6501-3p                          | 3 |
| <i>circEPB41L5</i> | miR-6504-3p                          | 2 |
| <i>circEPB41L5</i> | miR-651-5p                           | 1 |
| <i>circEPB41L5</i> | miR-6513-5p                          | 2 |
| <i>circEPB41L5</i> | miR-6514-5p                          | 1 |
| <i>circEPB41L5</i> | miR-6516-3p                          | 2 |
| <i>circEPB41L5</i> | miR-652-3p                           | 2 |
| <i>circEPB41L5</i> | miR-653-3p                           | 1 |
| <i>circEPB41L5</i> | miR-653-5p                           | 2 |
| <i>circEPB41L5</i> | miR-654-3p                           | 2 |
| <i>circEPB41L5</i> | miR-654-5p                           | 1 |
| <i>circEPB41L5</i> | miR-655-5p                           | 1 |

|                    |                       |   |
|--------------------|-----------------------|---|
| <i>circEPB41L5</i> | miR-656-3p            | 1 |
| <i>circEPB41L5</i> | miR-657               | 2 |
| <i>circEPB41L5</i> | miR-659-5p            | 1 |
| <i>circEPB41L5</i> | miR-660-3p            | 4 |
| <i>circEPB41L5</i> | miR-660-5p            | 1 |
| <i>circEPB41L5</i> | miR-661               | 2 |
| <i>circEPB41L5</i> | miR-664a-3p           | 2 |
| <i>circEPB41L5</i> | miR-664b-5p           | 2 |
| <i>circEPB41L5</i> | miR-670-3p            | 1 |
| <i>circEPB41L5</i> | miR-670-5p            | 3 |
| <i>circEPB41L5</i> | miR-671-5p            | 2 |
| <i>circEPB41L5</i> | miR-6716-5p           | 1 |
| <i>circEPB41L5</i> | miR-6720-5p           | 2 |
| <i>circEPB41L5</i> | miR-6728-3p           | 2 |
| <i>circEPB41L5</i> | miR-6728-5p           | 2 |
| <i>circEPB41L5</i> | miR-6729-3p           | 3 |
| <i>circEPB41L5</i> | miR-6730-5p           | 2 |
| <i>circEPB41L5</i> | miR-6731-3p           | 2 |
| <i>circEPB41L5</i> | miR-6731-5p/8085      | 2 |
| <i>circEPB41L5</i> | miR-6733-3p           | 1 |
| <i>circEPB41L5</i> | miR-6738-3p           | 2 |
| <i>circEPB41L5</i> | miR-6742-3p           | 1 |
| <i>circEPB41L5</i> | miR-6747-5p           | 1 |
| <i>circEPB41L5</i> | miR-6748-3p           | 3 |
| <i>circEPB41L5</i> | miR-6749-3p           | 1 |
| <i>circEPB41L5</i> | miR-6750-5p/6822-5p   | 1 |
| <i>circEPB41L5</i> | miR-6751-5p/6803-5p   | 2 |
| <i>circEPB41L5</i> | miR-6755-5p           | 1 |
| <i>circEPB41L5</i> | miR-6758-3p           | 2 |
| <i>circEPB41L5</i> | miR-6760-3p           | 3 |
| <i>circEPB41L5</i> | miR-6765-3p           | 1 |
| <i>circEPB41L5</i> | miR-6768-3p           | 1 |
| <i>circEPB41L5</i> | miR-6768-5p           | 2 |
| <i>circEPB41L5</i> | miR-6769a-5p/6769b-5p | 1 |
| <i>circEPB41L5</i> | miR-6770-5p           | 1 |
| <i>circEPB41L5</i> | miR-6772-5p           | 1 |
| <i>circEPB41L5</i> | miR-6773-3p           | 3 |
| <i>circEPB41L5</i> | miR-6776-3p           | 2 |

|                    |             |   |
|--------------------|-------------|---|
| <i>circEPB41L5</i> | miR-6777-3p | 3 |
| <i>circEPB41L5</i> | miR-6784-5p | 1 |
| <i>circEPB41L5</i> | miR-6789-5p | 1 |
| <i>circEPB41L5</i> | miR-6792-5p | 2 |
| <i>circEPB41L5</i> | miR-6793-3p | 2 |
| <i>circEPB41L5</i> | miR-6796-3p | 2 |
| <i>circEPB41L5</i> | miR-6799-5p | 2 |
| <i>circEPB41L5</i> | miR-6801-5p | 2 |
| <i>circEPB41L5</i> | miR-6807-5p | 1 |
| <i>circEPB41L5</i> | miR-6809-3p | 1 |
| <i>circEPB41L5</i> | miR-6809-5p | 1 |
| <i>circEPB41L5</i> | miR-6810-5p | 2 |
| <i>circEPB41L5</i> | miR-6818-3p | 1 |
| <i>circEPB41L5</i> | miR-6818-5p | 1 |
| <i>circEPB41L5</i> | miR-6822-3p | 1 |
| <i>circEPB41L5</i> | miR-6824-5p | 1 |
| <i>circEPB41L5</i> | miR-6825-5p | 4 |
| <i>circEPB41L5</i> | miR-6826-3p | 2 |
| <i>circEPB41L5</i> | miR-6827-5p | 1 |
| <i>circEPB41L5</i> | miR-6828-3p | 2 |
| <i>circEPB41L5</i> | miR-6828-5p | 2 |
| <i>circEPB41L5</i> | miR-6833-5p | 1 |
| <i>circEPB41L5</i> | miR-6834-3p | 3 |
| <i>circEPB41L5</i> | miR-6837-3p | 1 |
| <i>circEPB41L5</i> | miR-6840-3p | 2 |
| <i>circEPB41L5</i> | miR-6841-5p | 1 |
| <i>circEPB41L5</i> | miR-6842-3p | 1 |
| <i>circEPB41L5</i> | miR-6844    | 3 |
| <i>circEPB41L5</i> | miR-6847-5p | 1 |
| <i>circEPB41L5</i> | miR-6850-5p | 1 |
| <i>circEPB41L5</i> | miR-6851-3p | 2 |
| <i>circEPB41L5</i> | miR-6852-5p | 1 |
| <i>circEPB41L5</i> | miR-6854-5p | 2 |
| <i>circEPB41L5</i> | miR-6857-5p | 2 |
| <i>circEPB41L5</i> | miR-6861-3p | 1 |
| <i>circEPB41L5</i> | miR-6871-5p | 1 |
| <i>circEPB41L5</i> | miR-6873-5p | 1 |
| <i>circEPB41L5</i> | miR-6875-3p | 1 |

|                    |              |   |
|--------------------|--------------|---|
| <i>circEPB41L5</i> | miR-6878-5p  | 2 |
| <i>circEPB41L5</i> | miR-6892-3p  | 1 |
| <i>circEPB41L5</i> | miR-7-5p     | 3 |
| <i>circEPB41L5</i> | miR-708-3p   | 1 |
| <i>circEPB41L5</i> | miR-7106-5p  | 2 |
| <i>circEPB41L5</i> | miR-7108-5p  | 1 |
| <i>circEPB41L5</i> | miR-7109-3p  | 2 |
| <i>circEPB41L5</i> | miR-7109-5p  | 2 |
| <i>circEPB41L5</i> | miR-711      | 1 |
| <i>circEPB41L5</i> | miR-7112-3p  | 2 |
| <i>circEPB41L5</i> | miR-7150     | 1 |
| <i>circEPB41L5</i> | miR-7152-3p  | 2 |
| <i>circEPB41L5</i> | miR-7153-3p  | 3 |
| <i>circEPB41L5</i> | miR-7154-5p  | 1 |
| <i>circEPB41L5</i> | miR-7155-5p  | 2 |
| <i>circEPB41L5</i> | miR-7158-5p  | 1 |
| <i>circEPB41L5</i> | miR-759      | 2 |
| <i>circEPB41L5</i> | miR-760      | 1 |
| <i>circEPB41L5</i> | miR-766-3p   | 1 |
| <i>circEPB41L5</i> | miR-767-5p   | 3 |
| <i>circEPB41L5</i> | miR-770-5p   | 3 |
| <i>circEPB41L5</i> | miR-7702     | 3 |
| <i>circEPB41L5</i> | miR-7852-3p  | 2 |
| <i>circEPB41L5</i> | miR-7854-3p  | 2 |
| <i>circEPB41L5</i> | miR-7855-5p  | 1 |
| <i>circEPB41L5</i> | miR-7974     | 1 |
| <i>circEPB41L5</i> | miR-802      | 2 |
| <i>circEPB41L5</i> | miR-8065     | 1 |
| <i>circEPB41L5</i> | miR-8068     | 1 |
| <i>circEPB41L5</i> | miR-8070     | 4 |
| <i>circEPB41L5</i> | miR-8075     | 1 |
| <i>circEPB41L5</i> | miR-8087     | 1 |
| <i>circEPB41L5</i> | miR-8485     | 1 |
| <i>circEPB41L5</i> | miR-873-3p   | 2 |
| <i>circEPB41L5</i> | miR-873-5p.2 | 1 |
| <i>circEPB41L5</i> | miR-875-3p   | 1 |
| <i>circEPB41L5</i> | miR-876-5p   | 1 |
| <i>circEPB41L5</i> | miR-885-3p   | 1 |

|                    |                         |   |
|--------------------|-------------------------|---|
| <i>circEPB41L5</i> | miR-885-5p              | 3 |
| <i>circEPB41L5</i> | miR-887-5p              | 2 |
| <i>circEPB41L5</i> | miR-891a-3p             | 1 |
| <i>circEPB41L5</i> | miR-891b                | 2 |
| <i>circEPB41L5</i> | miR-892a                | 1 |
| <i>circEPB41L5</i> | miR-9-5p                | 2 |
| <i>circEPB41L5</i> | miR-924                 | 2 |
| <i>circEPB41L5</i> | miR-92a-2-5p            | 1 |
| <i>circEPB41L5</i> | miR-939-3p              | 1 |
| <i>circEPB41L5</i> | miR-939-5p/1343-5p      | 4 |
| <i>circEPB41L5</i> | miR-940/6808-5p/6893-5p | 1 |
| <i>circEPB41L5</i> | miR-942-5p              | 1 |
| <i>circEPB41L5</i> | miR-944                 | 1 |
| <i>circEPB41L5</i> | miR-95-5p               | 3 |
| <i>circEPB41L5</i> | miR-9500                | 1 |
| <i>circEPB41L5</i> | miR-96-3p               | 2 |
| <i>circEPB41L5</i> | miR-96-5p/1271-5p       | 1 |
| <i>circEPB41L5</i> | miR-99-3p               | 2 |
| <i>circEPB41L5</i> | miR-1298-3p             | 1 |
| <i>circEPB41L5</i> | miR-3126-3p             | 1 |
| <i>circEPB41L5</i> | miR-326                 | 1 |
| <i>circEPB41L5</i> | miR-518c-5p             | 1 |
| <i>circEPB41L5</i> | miR-6764-3p/6824-3p     | 1 |
| <i>circERBIN</i>   | miR-106a-3p             | 2 |
| <i>circERBIN</i>   | miR-1231                | 1 |
| <i>circERBIN</i>   | miR-1236-3p             | 2 |
| <i>circERBIN</i>   | miR-1238-3p             | 1 |
| <i>circERBIN</i>   | miR-1244                | 1 |
| <i>circERBIN</i>   | miR-1246                | 1 |
| <i>circERBIN</i>   | miR-125-5p              | 2 |
| <i>circERBIN</i>   | miR-1250-3p             | 1 |
| <i>circERBIN</i>   | miR-1251-3p             | 1 |
| <i>circERBIN</i>   | miR-1263                | 1 |
| <i>circERBIN</i>   | miR-1273c               | 1 |
| <i>circERBIN</i>   | miR-1305                | 1 |
| <i>circERBIN</i>   | miR-130b-5p             | 1 |
| <i>circERBIN</i>   | miR-133a-5p             | 1 |
| <i>circERBIN</i>   | miR-138-5p              | 1 |

|                  |                   |   |
|------------------|-------------------|---|
| <i>circERBIN</i> | miR-141-5p        | 1 |
| <i>circERBIN</i> | miR-142-3p.1      | 1 |
| <i>circERBIN</i> | miR-145-5p        | 1 |
| <i>circERBIN</i> | miR-150-3p        | 1 |
| <i>circERBIN</i> | miR-153-5p        | 1 |
| <i>circERBIN</i> | miR-183-3p        | 1 |
| <i>circERBIN</i> | miR-185-3p        | 1 |
| <i>circERBIN</i> | miR-19-5p         | 1 |
| <i>circERBIN</i> | miR-196b-3p       | 1 |
| <i>circERBIN</i> | miR-2052          | 1 |
| <i>circERBIN</i> | miR-2053          | 1 |
| <i>circERBIN</i> | miR-2113          | 1 |
| <i>circERBIN</i> | miR-216a-5p       | 1 |
| <i>circERBIN</i> | miR-216b-5p       | 1 |
| <i>circERBIN</i> | miR-22-3p         | 1 |
| <i>circERBIN</i> | miR-2276-3p       | 1 |
| <i>circERBIN</i> | miR-2277-3p       | 1 |
| <i>circERBIN</i> | miR-2392          | 1 |
| <i>circERBIN</i> | miR-3121-3p       | 1 |
| <i>circERBIN</i> | miR-3128          | 1 |
| <i>circERBIN</i> | miR-3192-3p       | 1 |
| <i>circERBIN</i> | miR-3200-5p       | 1 |
| <i>circERBIN</i> | miR-320e          | 1 |
| <i>circERBIN</i> | miR-329-3p/362-3p | 1 |
| <i>circERBIN</i> | miR-335-3p        | 1 |
| <i>circERBIN</i> | miR-335-5p        | 1 |
| <i>circERBIN</i> | miR-345-5p        | 1 |
| <i>circERBIN</i> | miR-3606-5p       | 1 |
| <i>circERBIN</i> | miR-3607-3p       | 1 |
| <i>circERBIN</i> | miR-3660/4526     | 2 |
| <i>circERBIN</i> | miR-3674          | 1 |
| <i>circERBIN</i> | miR-3675-3p       | 1 |
| <i>circERBIN</i> | miR-3679-3p       | 1 |
| <i>circERBIN</i> | miR-3680-3p       | 1 |
| <i>circERBIN</i> | miR-3683          | 1 |
| <i>circERBIN</i> | miR-374b-3p       | 1 |
| <i>circERBIN</i> | miR-380-5p/563    | 1 |
| <i>circERBIN</i> | miR-382-3p        | 1 |

|                  |                     |   |
|------------------|---------------------|---|
| <i>circERBIN</i> | miR-382-5p          | 1 |
| <i>circERBIN</i> | miR-3913-3p         | 1 |
| <i>circERBIN</i> | miR-3920            | 1 |
| <i>circERBIN</i> | miR-3928-5p/6806-3p | 1 |
| <i>circERBIN</i> | miR-3940-5p/4507    | 1 |
| <i>circERBIN</i> | miR-3976            | 1 |
| <i>circERBIN</i> | miR-4251            | 1 |
| <i>circERBIN</i> | miR-4263            | 1 |
| <i>circERBIN</i> | miR-4264            | 1 |
| <i>circERBIN</i> | miR-4273/7156-5p    | 1 |
| <i>circERBIN</i> | miR-4277            | 1 |
| <i>circERBIN</i> | miR-4279            | 1 |
| <i>circERBIN</i> | miR-4287/4685-3p    | 1 |
| <i>circERBIN</i> | miR-4289            | 1 |
| <i>circERBIN</i> | miR-4307            | 1 |
| <i>circERBIN</i> | miR-432-3p          | 1 |
| <i>circERBIN</i> | miR-4324            | 1 |
| <i>circERBIN</i> | miR-4326            | 1 |
| <i>circERBIN</i> | miR-4328            | 1 |
| <i>circERBIN</i> | miR-4329            | 1 |
| <i>circERBIN</i> | miR-4432            | 1 |
| <i>circERBIN</i> | miR-4452            | 1 |
| <i>circERBIN</i> | miR-4463            | 1 |
| <i>circERBIN</i> | miR-4464/4748       | 2 |
| <i>circERBIN</i> | miR-4469            | 1 |
| <i>circERBIN</i> | miR-4470            | 1 |
| <i>circERBIN</i> | miR-4490            | 1 |
| <i>circERBIN</i> | miR-4499            | 1 |
| <i>circERBIN</i> | miR-4502            | 1 |
| <i>circERBIN</i> | miR-4504            | 1 |
| <i>circERBIN</i> | miR-450b-5p         | 1 |
| <i>circERBIN</i> | miR-4513/6855-3p    | 1 |
| <i>circERBIN</i> | miR-4524b-3p        | 1 |
| <i>circERBIN</i> | miR-4645-3p         | 2 |
| <i>circERBIN</i> | miR-4655-3p         | 1 |
| <i>circERBIN</i> | miR-4668-3p         | 1 |
| <i>circERBIN</i> | miR-4670-5p         | 1 |
| <i>circERBIN</i> | miR-4677-5p         | 1 |



|                  |                                                                  |   |
|------------------|------------------------------------------------------------------|---|
| <i>circERBIN</i> | miR-4691-5p/6792-3p                                              | 1 |
| <i>circERBIN</i> | miR-4712-3p                                                      | 1 |
| <i>circERBIN</i> | miR-4713-5p                                                      | 1 |
| <i>circERBIN</i> | miR-4719                                                         | 1 |
| <i>circERBIN</i> | miR-4720-5p/4799-3p/5588-5p                                      | 1 |
| <i>circERBIN</i> | miR-4728-3p                                                      | 1 |
| <i>circERBIN</i> | miR-4732-3p                                                      | 2 |
| <i>circERBIN</i> | miR-4753-3p                                                      | 1 |
| <i>circERBIN</i> | miR-4755-5p/5006-3p                                              | 1 |
| <i>circERBIN</i> | miR-4761-5p                                                      | 1 |
| <i>circERBIN</i> | miR-4772-3p                                                      | 1 |
| <i>circERBIN</i> | miR-4774-5p                                                      | 1 |
| <i>circERBIN</i> | miR-4797-3p                                                      | 1 |
| <i>circERBIN</i> | miR-4799-5p                                                      | 1 |
| <i>circERBIN</i> | miR-4802-3p                                                      | 1 |
| <i>circERBIN</i> | miR-489-3p                                                       | 1 |
| <i>circERBIN</i> | miR-495-3p                                                       | 1 |
| <i>circERBIN</i> | miR-495-5p                                                       | 1 |
| <i>circERBIN</i> | miR-5010-3p                                                      | 1 |
| <i>circERBIN</i> | miR-507/557                                                      | 1 |
| <i>circERBIN</i> | miR-5087                                                         | 1 |
| <i>circERBIN</i> | miR-512-5p                                                       | 1 |
| <i>circERBIN</i> | miR-5186                                                         | 1 |
| <i>circERBIN</i> | miR-519d-5p                                                      | 1 |
| <i>circERBIN</i> | miR-542-3p                                                       | 1 |
| <i>circERBIN</i> | miR-544b                                                         | 1 |
| <i>circERBIN</i> | miR-548at-5p                                                     | 1 |
| <i>circERBIN</i> | miR-548av-5p/548k/8054                                           | 1 |
| <i>circERBIN</i> | miR-548ay-5p/548au-5p/548as-5p/548ar-5p/548aq-5p/548ap-5p/548am- | 1 |
| <i>circERBIN</i> | miR-548az-5p/548t-5p                                             | 2 |
| <i>circERBIN</i> | miR-548c-3p                                                      | 1 |
| <i>circERBIN</i> | miR-548l                                                         | 1 |
| <i>circERBIN</i> | miR-548n                                                         | 2 |
| <i>circERBIN</i> | miR-548u/7161-5p                                                 | 1 |
| <i>circERBIN</i> | miR-551b-5p                                                      | 1 |
| <i>circERBIN</i> | miR-5579-5p                                                      | 1 |
| <i>circERBIN</i> | miR-5586-5p                                                      | 1 |
| <i>circERBIN</i> | miR-561-3p                                                       | 1 |

|                  |              |   |
|------------------|--------------|---|
| <i>circERBIN</i> | miR-5695     | 1 |
| <i>circERBIN</i> | miR-5696     | 1 |
| <i>circERBIN</i> | miR-576-5p   | 1 |
| <i>circERBIN</i> | miR-578      | 1 |
| <i>circERBIN</i> | miR-579-3p   | 1 |
| <i>circERBIN</i> | miR-580-3p   | 1 |
| <i>circERBIN</i> | miR-592      | 1 |
| <i>circERBIN</i> | miR-599      | 1 |
| <i>circERBIN</i> | miR-603      | 1 |
| <i>circERBIN</i> | miR-607      | 1 |
| <i>circERBIN</i> | miR-6073     | 1 |
| <i>circERBIN</i> | miR-6079     | 1 |
| <i>circERBIN</i> | miR-6131     | 1 |
| <i>circERBIN</i> | miR-616-3p   | 1 |
| <i>circERBIN</i> | miR-622      | 1 |
| <i>circERBIN</i> | miR-628-5p   | 1 |
| <i>circERBIN</i> | miR-632/4288 | 1 |
| <i>circERBIN</i> | miR-642-3p   | 1 |
| <i>circERBIN</i> | miR-642b-5p  | 1 |
| <i>circERBIN</i> | miR-6515-3p  | 2 |
| <i>circERBIN</i> | miR-670-3p   | 1 |
| <i>circERBIN</i> | miR-670-5p   | 2 |
| <i>circERBIN</i> | miR-671-5p   | 1 |
| <i>circERBIN</i> | miR-6719-3p  | 2 |
| <i>circERBIN</i> | miR-6730-3p  | 2 |
| <i>circERBIN</i> | miR-6739-3p  | 1 |
| <i>circERBIN</i> | miR-6749-3p  | 1 |
| <i>circERBIN</i> | miR-6750-3p  | 1 |
| <i>circERBIN</i> | miR-6757-3p  | 1 |
| <i>circERBIN</i> | miR-676-5p   | 1 |
| <i>circERBIN</i> | miR-6761-5p  | 1 |
| <i>circERBIN</i> | miR-6776-5p  | 1 |
| <i>circERBIN</i> | miR-6780a-3p | 1 |
| <i>circERBIN</i> | miR-6795-3p  | 1 |
| <i>circERBIN</i> | miR-6796-3p  | 1 |
| <i>circERBIN</i> | miR-6803-3p  | 1 |
| <i>circERBIN</i> | miR-6826-3p  | 1 |
| <i>circERBIN</i> | miR-6828-5p  | 1 |

|                   |                   |   |
|-------------------|-------------------|---|
| <i>circERBIN</i>  | miR-6839-3p       | 1 |
| <i>circERBIN</i>  | miR-6857-3p       | 1 |
| <i>circERBIN</i>  | miR-6861-5p       | 1 |
| <i>circERBIN</i>  | miR-6867-3p       | 1 |
| <i>circERBIN</i>  | miR-6868-5p       | 1 |
| <i>circERBIN</i>  | miR-6881-3p       | 1 |
| <i>circERBIN</i>  | miR-6887-3p       | 1 |
| <i>circERBIN</i>  | miR-7111-3p       | 1 |
| <i>circERBIN</i>  | miR-7113-3p       | 1 |
| <i>circERBIN</i>  | miR-758-5p        | 1 |
| <i>circERBIN</i>  | miR-7702          | 1 |
| <i>circERBIN</i>  | miR-7850-5p       | 1 |
| <i>circERBIN</i>  | miR-8068          | 1 |
| <i>circERBIN</i>  | miR-8087          | 1 |
| <i>circERBIN</i>  | miR-8485          | 1 |
| <i>circERBIN</i>  | miR-888-3p        | 1 |
| <i>circERBIN</i>  | miR-9-5p          | 1 |
| <i>circERBIN</i>  | miR-921           | 1 |
| <i>circERBIN</i>  | miR-935           | 1 |
| <i>circERBIN</i>  | miR-99-3p         | 1 |
| <i>circEXOSC1</i> | miR-1180-3p       | 1 |
| <i>circEXOSC1</i> | miR-1180-5p       | 1 |
| <i>circEXOSC1</i> | miR-1207-3p       | 1 |
| <i>circEXOSC1</i> | miR-122-5p        | 1 |
| <i>circEXOSC1</i> | miR-1225-5p       | 1 |
| <i>circEXOSC1</i> | miR-1229-5p       | 1 |
| <i>circEXOSC1</i> | miR-1245b-3p      | 2 |
| <i>circEXOSC1</i> | miR-125a-3p       | 1 |
| <i>circEXOSC1</i> | miR-1273f         | 1 |
| <i>circEXOSC1</i> | miR-1273h-3p      | 1 |
| <i>circEXOSC1</i> | miR-128-3p        | 2 |
| <i>circEXOSC1</i> | miR-133a-5p       | 1 |
| <i>circEXOSC1</i> | miR-138-5p        | 1 |
| <i>circEXOSC1</i> | miR-140-3p.1      | 1 |
| <i>circEXOSC1</i> | miR-143-3p        | 1 |
| <i>circEXOSC1</i> | miR-143-5p        | 1 |
| <i>circEXOSC1</i> | miR-146-5p        | 1 |
| <i>circEXOSC1</i> | miR-148-3p/152-3p | 1 |

|                   |                                              |   |
|-------------------|----------------------------------------------|---|
| <i>circEXOSC1</i> | miR-181d-3p                                  | 1 |
| <i>circEXOSC1</i> | miR-182-3p                                   | 1 |
| <i>circEXOSC1</i> | miR-186-3p                                   | 1 |
| <i>circEXOSC1</i> | miR-186-5p                                   | 1 |
| <i>circEXOSC1</i> | miR-18b-3p                                   | 1 |
| <i>circEXOSC1</i> | miR-1910-5p                                  | 1 |
| <i>circEXOSC1</i> | miR-1911-5p                                  | 1 |
| <i>circEXOSC1</i> | miR-1915-3p/6764-5p                          | 1 |
| <i>circEXOSC1</i> | miR-203b-5p/6718-5p                          | 1 |
| <i>circEXOSC1</i> | miR-204-3p/4646-5p                           | 1 |
| <i>circEXOSC1</i> | miR-208-3p                                   | 1 |
| <i>circEXOSC1</i> | miR-218-1-3p                                 | 1 |
| <i>circEXOSC1</i> | miR-218-2-3p                                 | 1 |
| <i>circEXOSC1</i> | miR-23-5p                                    | 1 |
| <i>circEXOSC1</i> | miR-2681-5p                                  | 1 |
| <i>circEXOSC1</i> | miR-30b-3p/1273h-5p/3689-3p/6779-5p/6780a-5p | 1 |
| <i>circEXOSC1</i> | miR-30c-3p/6788-5p                           | 1 |
| <i>circEXOSC1</i> | miR-3133                                     | 1 |
| <i>circEXOSC1</i> | miR-3157-3p                                  | 1 |
| <i>circEXOSC1</i> | miR-3160-3p                                  | 1 |
| <i>circEXOSC1</i> | miR-3166                                     | 1 |
| <i>circEXOSC1</i> | miR-3174                                     | 1 |
| <i>circEXOSC1</i> | miR-3179                                     | 1 |
| <i>circEXOSC1</i> | miR-3192-5p                                  | 1 |
| <i>circEXOSC1</i> | miR-3202                                     | 1 |
| <i>circEXOSC1</i> | miR-323a-5p                                  | 1 |
| <i>circEXOSC1</i> | miR-33b-3p/515-3p/519e-3p                    | 1 |
| <i>circEXOSC1</i> | miR-34a-3p                                   | 1 |
| <i>circEXOSC1</i> | miR-3617-3p                                  | 1 |
| <i>circEXOSC1</i> | miR-3650                                     | 1 |
| <i>circEXOSC1</i> | miR-3653-3p                                  | 1 |
| <i>circEXOSC1</i> | miR-3667-5p                                  | 1 |
| <i>circEXOSC1</i> | miR-3678-3p                                  | 1 |
| <i>circEXOSC1</i> | miR-3688-3p                                  | 1 |
| <i>circEXOSC1</i> | miR-370-3p                                   | 1 |
| <i>circEXOSC1</i> | miR-3713                                     | 2 |
| <i>circEXOSC1</i> | miR-371a-3p                                  | 1 |
| <i>circEXOSC1</i> | miR-371b-3p                                  | 1 |

|                   |                             |   |
|-------------------|-----------------------------|---|
| <i>circEXOSC1</i> | miR-380-5p/563              | 1 |
| <i>circEXOSC1</i> | miR-3934-5p                 | 1 |
| <i>circEXOSC1</i> | miR-3940-3p                 | 1 |
| <i>circEXOSC1</i> | miR-4252                    | 1 |
| <i>circEXOSC1</i> | miR-4279                    | 2 |
| <i>circEXOSC1</i> | miR-4299                    | 1 |
| <i>circEXOSC1</i> | miR-4456                    | 1 |
| <i>circEXOSC1</i> | miR-4475                    | 1 |
| <i>circEXOSC1</i> | miR-4481/4745-5p            | 1 |
| <i>circEXOSC1</i> | miR-4487                    | 1 |
| <i>circEXOSC1</i> | miR-4504                    | 1 |
| <i>circEXOSC1</i> | miR-4509                    | 1 |
| <i>circEXOSC1</i> | miR-4533                    | 1 |
| <i>circEXOSC1</i> | miR-4536-5p                 | 1 |
| <i>circEXOSC1</i> | miR-455-3p.1                | 1 |
| <i>circEXOSC1</i> | miR-455-3p.2                | 1 |
| <i>circEXOSC1</i> | miR-4639-5p                 | 1 |
| <i>circEXOSC1</i> | miR-4664-3p                 | 1 |
| <i>circEXOSC1</i> | miR-4695-3p                 | 1 |
| <i>circEXOSC1</i> | miR-4704-5p                 | 1 |
| <i>circEXOSC1</i> | miR-4708-5p                 | 1 |
| <i>circEXOSC1</i> | miR-4713-3p                 | 1 |
| <i>circEXOSC1</i> | miR-4726-3p                 | 1 |
| <i>circEXOSC1</i> | miR-4731-5p                 | 1 |
| <i>circEXOSC1</i> | miR-4740-3p                 | 1 |
| <i>circEXOSC1</i> | miR-4744                    | 1 |
| <i>circEXOSC1</i> | miR-4771                    | 1 |
| <i>circEXOSC1</i> | miR-4786-3p                 | 1 |
| <i>circEXOSC1</i> | miR-488-5p                  | 2 |
| <i>circEXOSC1</i> | miR-489-3p                  | 1 |
| <i>circEXOSC1</i> | miR-499a-5p                 | 1 |
| <i>circEXOSC1</i> | miR-5003-3p                 | 1 |
| <i>circEXOSC1</i> | miR-501-3p/502-3p           | 1 |
| <i>circEXOSC1</i> | miR-503-3p                  | 1 |
| <i>circEXOSC1</i> | miR-510-3p                  | 1 |
| <i>circEXOSC1</i> | miR-513a-3p/513c-3p/3606-3p | 1 |
| <i>circEXOSC1</i> | miR-5190                    | 1 |
| <i>circEXOSC1</i> | miR-525-5p                  | 2 |

|                   |                                                                    |   |
|-------------------|--------------------------------------------------------------------|---|
| <i>circEXOSC1</i> | miR-541-5p                                                         | 1 |
| <i>circEXOSC1</i> | miR-542-3p                                                         | 1 |
| <i>circEXOSC1</i> | miR-548ao-3p                                                       | 1 |
| <i>circEXOSC1</i> | miR-548av-5p/548k/8054                                             | 1 |
| <i>circEXOSC1</i> | miR-548ay-5p/548au-5p/548as-5p/548ar-5p/548aq-5p/548ap-5p/548am-5p | 1 |
| <i>circEXOSC1</i> | miR-548l                                                           | 1 |
| <i>circEXOSC1</i> | miR-548q                                                           | 1 |
| <i>circEXOSC1</i> | miR-5571-5p                                                        | 1 |
| <i>circEXOSC1</i> | miR-5579-5p                                                        | 1 |
| <i>circEXOSC1</i> | miR-558                                                            | 1 |
| <i>circEXOSC1</i> | miR-5586-5p                                                        | 2 |
| <i>circEXOSC1</i> | miR-5589-5p                                                        | 1 |
| <i>circEXOSC1</i> | miR-562                                                            | 1 |
| <i>circEXOSC1</i> | miR-5702                                                           | 1 |
| <i>circEXOSC1</i> | miR-578                                                            | 1 |
| <i>circEXOSC1</i> | miR-589-5p                                                         | 1 |
| <i>circEXOSC1</i> | miR-606                                                            | 1 |
| <i>circEXOSC1</i> | miR-6079                                                           | 1 |
| <i>circEXOSC1</i> | miR-6084                                                           | 1 |
| <i>circEXOSC1</i> | miR-6131                                                           | 1 |
| <i>circEXOSC1</i> | miR-619-5p/6506-5p                                                 | 1 |
| <i>circEXOSC1</i> | miR-627-5p                                                         | 1 |
| <i>circEXOSC1</i> | miR-638                                                            | 1 |
| <i>circEXOSC1</i> | miR-642b-5p                                                        | 1 |
| <i>circEXOSC1</i> | miR-6499-3p                                                        | 1 |
| <i>circEXOSC1</i> | miR-6507-5p                                                        | 1 |
| <i>circEXOSC1</i> | miR-6509-5p                                                        | 2 |
| <i>circEXOSC1</i> | miR-6516-5p                                                        | 1 |
| <i>circEXOSC1</i> | miR-652-5p                                                         | 1 |
| <i>circEXOSC1</i> | miR-6757-5p                                                        | 1 |
| <i>circEXOSC1</i> | miR-6776-3p                                                        | 1 |
| <i>circEXOSC1</i> | miR-6800-5p                                                        | 2 |
| <i>circEXOSC1</i> | miR-6802-5p                                                        | 2 |
| <i>circEXOSC1</i> | miR-6840-3p                                                        | 1 |
| <i>circEXOSC1</i> | miR-6884-3p                                                        | 1 |
| <i>circEXOSC1</i> | miR-718                                                            | 1 |
| <i>circEXOSC1</i> | miR-7515                                                           | 1 |
| <i>circEXOSC1</i> | miR-758-5p                                                         | 1 |

|                   |                                     |   |
|-------------------|-------------------------------------|---|
| <i>circEXOSC1</i> | miR-7848-3p                         | 1 |
| <i>circEXOSC1</i> | miR-7978                            | 1 |
| <i>circEXOSC1</i> | miR-8069                            | 2 |
| <i>circEXOSC1</i> | miR-874-3p                          | 1 |
| <i>circEXOSC1</i> | miR-876-3p                          | 1 |
| <i>circEXOSC1</i> | miR-937-5p                          | 1 |
| <i>circEXOSC1</i> | miR-130-3p/301-3p/454-3p            | 1 |
| <i>circEXOSC1</i> | miR-17-5p/20-5p/93-5p/106-5p/519-3p | 1 |
| <i>circEXOSC1</i> | miR-183-5p.1                        | 1 |
| <i>circEXOSC1</i> | miR-19-3p                           | 1 |
| <i>circEXOSC1</i> | miR-211-3p                          | 2 |
| <i>circEXOSC1</i> | miR-219b-5p                         | 2 |
| <i>circEXOSC1</i> | miR-302-3p/372-3p/373-3p/520-3p     | 1 |
| <i>circEXOSC1</i> | miR-31-5p                           | 1 |
| <i>circEXOSC1</i> | miR-3187-3p                         | 1 |
| <i>circEXOSC1</i> | miR-323b-5p/410-5p/494-5p           | 1 |
| <i>circEXOSC1</i> | miR-3926                            | 1 |
| <i>circEXOSC1</i> | miR-3973                            | 1 |
| <i>circEXOSC1</i> | miR-4289                            | 1 |
| <i>circEXOSC1</i> | miR-431-5p                          | 1 |
| <i>circEXOSC1</i> | miR-4426/4647/4662b                 | 2 |
| <i>circEXOSC1</i> | miR-4435                            | 1 |
| <i>circEXOSC1</i> | miR-4476/6876-5p                    | 2 |
| <i>circEXOSC1</i> | miR-4699-5p                         | 2 |
| <i>circEXOSC1</i> | miR-4708-3p                         | 2 |
| <i>circEXOSC1</i> | miR-4724-5p                         | 1 |
| <i>circEXOSC1</i> | miR-4761-5p                         | 1 |
| <i>circEXOSC1</i> | miR-4766-5p                         | 1 |
| <i>circEXOSC1</i> | miR-511-5p                          | 1 |
| <i>circEXOSC1</i> | miR-519-3p                          | 1 |
| <i>circEXOSC1</i> | miR-520g-3p                         | 1 |
| <i>circEXOSC1</i> | miR-548ah-5p/3609                   | 1 |
| <i>circEXOSC1</i> | miR-548s                            | 1 |
| <i>circEXOSC1</i> | miR-548u/7161-5p                    | 1 |
| <i>circEXOSC1</i> | miR-576-3p                          | 2 |
| <i>circEXOSC1</i> | miR-588                             | 1 |
| <i>circEXOSC1</i> | miR-6077                            | 2 |
| <i>circEXOSC1</i> | miR-615-3p                          | 2 |

|                   |                       |   |
|-------------------|-----------------------|---|
| <i>circEXOSC1</i> | miR-624-3p            | 1 |
| <i>circEXOSC1</i> | miR-641/3617-5p       | 1 |
| <i>circEXOSC1</i> | miR-651-3p            | 2 |
| <i>circEXOSC1</i> | miR-6809-5p           | 1 |
| <i>circEXOSC1</i> | miR-6830-5p           | 2 |
| <i>circEXOSC1</i> | miR-6834-3p           | 2 |
| <i>circEXOSC1</i> | miR-7-5p              | 2 |
| <i>circEXOSC1</i> | miR-891b              | 1 |
| <i>circFANCB</i>  | let-7a-2-3p/let-7g-3p | 2 |
| <i>circFANCB</i>  | let-7c-3p             | 2 |
| <i>circFANCB</i>  | miR-1-5p              | 1 |
| <i>circFANCB</i>  | miR-101-5p            | 3 |
| <i>circFANCB</i>  | miR-103-3p/107        | 2 |
| <i>circFANCB</i>  | miR-103a-2-5p         | 1 |
| <i>circFANCB</i>  | miR-103b              | 2 |
| <i>circFANCB</i>  | miR-1178-5p           | 2 |
| <i>circFANCB</i>  | miR-1179              | 2 |
| <i>circFANCB</i>  | miR-1181              | 2 |
| <i>circFANCB</i>  | miR-1182              | 2 |
| <i>circFANCB</i>  | miR-1183              | 1 |
| <i>circFANCB</i>  | miR-1208              | 1 |
| <i>circFANCB</i>  | miR-1236-3p           | 2 |
| <i>circFANCB</i>  | miR-1238-3p           | 5 |
| <i>circFANCB</i>  | miR-1244              | 2 |
| <i>circFANCB</i>  | miR-1246              | 2 |
| <i>circFANCB</i>  | miR-125-5p            | 3 |
| <i>circFANCB</i>  | miR-1251-3p           | 1 |
| <i>circFANCB</i>  | miR-1252-5p           | 4 |
| <i>circFANCB</i>  | miR-1253              | 3 |
| <i>circFANCB</i>  | miR-1255b-2-3p        | 1 |
| <i>circFANCB</i>  | miR-1256              | 2 |
| <i>circFANCB</i>  | miR-1264              | 1 |
| <i>circFANCB</i>  | miR-1270              | 4 |
| <i>circFANCB</i>  | miR-1272              | 1 |
| <i>circFANCB</i>  | miR-1273h-3p          | 5 |
| <i>circFANCB</i>  | miR-1276              | 6 |
| <i>circFANCB</i>  | miR-1283              | 3 |
| <i>circFANCB</i>  | miR-1284              | 1 |



|                  |                                     |   |
|------------------|-------------------------------------|---|
| <i>circFANCB</i> | miR-1285-5p                         | 2 |
| <i>circFANCB</i> | miR-129-5p                          | 2 |
| <i>circFANCB</i> | miR-1290                            | 2 |
| <i>circFANCB</i> | miR-1301-3p                         | 1 |
| <i>circFANCB</i> | miR-1302/4298                       | 2 |
| <i>circFANCB</i> | miR-1305                            | 4 |
| <i>circFANCB</i> | miR-130b-5p                         | 5 |
| <i>circFANCB</i> | miR-132-3p/212-3p                   | 2 |
| <i>circFANCB</i> | miR-1322                            | 1 |
| <i>circFANCB</i> | miR-1324                            | 3 |
| <i>circFANCB</i> | miR-134-5p                          | 2 |
| <i>circFANCB</i> | miR-135a-3p                         | 1 |
| <i>circFANCB</i> | miR-139-5p                          | 2 |
| <i>circFANCB</i> | miR-142-3p.1                        | 2 |
| <i>circFANCB</i> | miR-142-3p.2                        | 3 |
| <i>circFANCB</i> | miR-142-5p                          | 2 |
| <i>circFANCB</i> | miR-145-5p                          | 4 |
| <i>circFANCB</i> | miR-146-5p                          | 1 |
| <i>circFANCB</i> | miR-1468-3p                         | 1 |
| <i>circFANCB</i> | miR-146b-3p                         | 1 |
| <i>circFANCB</i> | miR-147a                            | 4 |
| <i>circFANCB</i> | miR-148-3p/152-3p                   | 2 |
| <i>circFANCB</i> | miR-148b-5p/6874-3p                 | 2 |
| <i>circFANCB</i> | miR-1537-5p                         | 2 |
| <i>circFANCB</i> | miR-15b-3p                          | 5 |
| <i>circFANCB</i> | miR-17-5p/20-5p/93-5p/106-5p/519-3p | 2 |
| <i>circFANCB</i> | miR-18-5p                           | 1 |
| <i>circFANCB</i> | miR-181-5p                          | 1 |
| <i>circFANCB</i> | miR-1825                            | 2 |
| <i>circFANCB</i> | miR-183-3p                          | 1 |
| <i>circFANCB</i> | miR-183-5p.1                        | 2 |
| <i>circFANCB</i> | miR-185-3p                          | 5 |
| <i>circFANCB</i> | miR-185-5p                          | 2 |
| <i>circFANCB</i> | miR-186-5p                          | 7 |
| <i>circFANCB</i> | miR-188-5p                          | 2 |
| <i>circFANCB</i> | miR-1911-5p                         | 1 |
| <i>circFANCB</i> | miR-194-5p                          | 1 |
| <i>circFANCB</i> | miR-197-3p                          | 1 |

|                  |                          |   |
|------------------|--------------------------|---|
| <i>circFANCB</i> | miR-199-5p               | 2 |
| <i>circFANCB</i> | miR-202-5p               | 2 |
| <i>circFANCB</i> | miR-203a-3p.1            | 2 |
| <i>circFANCB</i> | miR-203b-5p/6718-5p      | 1 |
| <i>circFANCB</i> | miR-204-3p/4646-5p       | 1 |
| <i>circFANCB</i> | miR-205-5p               | 4 |
| <i>circFANCB</i> | miR-2053                 | 1 |
| <i>circFANCB</i> | miR-208-5p               | 2 |
| <i>circFANCB</i> | miR-21-3p/3591-3p        | 4 |
| <i>circFANCB</i> | miR-2113                 | 5 |
| <i>circFANCB</i> | miR-2115-3p              | 7 |
| <i>circFANCB</i> | miR-2117                 | 2 |
| <i>circFANCB</i> | miR-216a-5p              | 2 |
| <i>circFANCB</i> | miR-216b-5p              | 2 |
| <i>circFANCB</i> | miR-221-3p/222-3p        | 1 |
| <i>circFANCB</i> | miR-222-5p               | 1 |
| <i>circFANCB</i> | miR-23-3p                | 1 |
| <i>circFANCB</i> | miR-2467-3p              | 4 |
| <i>circFANCB</i> | miR-26-3p                | 3 |
| <i>circFANCB</i> | miR-29-3p                | 1 |
| <i>circFANCB</i> | miR-29b-1-5p             | 2 |
| <i>circFANCB</i> | miR-302c-5p              | 1 |
| <i>circFANCB</i> | miR-3065-3p              | 3 |
| <i>circFANCB</i> | miR-31-3p                | 2 |
| <i>circFANCB</i> | miR-3115                 | 1 |
| <i>circFANCB</i> | miR-3117-5p              | 1 |
| <i>circFANCB</i> | miR-3121-3p              | 2 |
| <i>circFANCB</i> | miR-3123                 | 6 |
| <i>circFANCB</i> | miR-3124-3p              | 1 |
| <i>circFANCB</i> | miR-3124-5p              | 2 |
| <i>circFANCB</i> | miR-3125/3916/6859-5p    | 4 |
| <i>circFANCB</i> | miR-3133                 | 7 |
| <i>circFANCB</i> | miR-3140-5p              | 2 |
| <i>circFANCB</i> | miR-3143                 | 2 |
| <i>circFANCB</i> | miR-3145-5p              | 1 |
| <i>circFANCB</i> | miR-3148                 | 6 |
| <i>circFANCB</i> | miR-3153/6733-5p/6739-5p | 3 |
| <i>circFANCB</i> | miR-3154                 | 5 |

|                  |                           |   |
|------------------|---------------------------|---|
| <i>circFANCB</i> | miR-3156-5p               | 3 |
| <i>circFANCB</i> | miR-3157-3p               | 2 |
| <i>circFANCB</i> | miR-3159                  | 1 |
| <i>circFANCB</i> | miR-3161                  | 3 |
| <i>circFANCB</i> | miR-3162-3p               | 2 |
| <i>circFANCB</i> | miR-3164                  | 2 |
| <i>circFANCB</i> | miR-3168                  | 2 |
| <i>circFANCB</i> | miR-3173-5p               | 1 |
| <i>circFANCB</i> | miR-3174                  | 4 |
| <i>circFANCB</i> | miR-3177-5p               | 2 |
| <i>circFANCB</i> | miR-3179                  | 3 |
| <i>circFANCB</i> | miR-3180-5p               | 6 |
| <i>circFANCB</i> | miR-3182                  | 2 |
| <i>circFANCB</i> | miR-3184-3p               | 1 |
| <i>circFANCB</i> | miR-3185                  | 8 |
| <i>circFANCB</i> | miR-3192-5p               | 1 |
| <i>circFANCB</i> | miR-32-3p                 | 6 |
| <i>circFANCB</i> | miR-320                   | 2 |
| <i>circFANCB</i> | miR-330-3p.2              | 4 |
| <i>circFANCB</i> | miR-331-3p                | 1 |
| <i>circFANCB</i> | miR-335-3p                | 2 |
| <i>circFANCB</i> | miR-338-3p                | 1 |
| <i>circFANCB</i> | miR-33a-3p                | 3 |
| <i>circFANCB</i> | miR-33b-3p/515-3p/519e-3p | 2 |
| <i>circFANCB</i> | miR-340-5p                | 2 |
| <i>circFANCB</i> | miR-345-3p                | 2 |
| <i>circFANCB</i> | miR-3607-5p               | 2 |
| <i>circFANCB</i> | miR-361-5p                | 3 |
| <i>circFANCB</i> | miR-3611                  | 6 |
| <i>circFANCB</i> | miR-3613-3p               | 6 |
| <i>circFANCB</i> | miR-3614-5p               | 1 |
| <i>circFANCB</i> | miR-362-5p/500b-5p        | 4 |
| <i>circFANCB</i> | miR-3650                  | 3 |
| <i>circFANCB</i> | miR-3653-3p               | 2 |
| <i>circFANCB</i> | miR-3659                  | 1 |
| <i>circFANCB</i> | miR-3660/4526             | 1 |
| <i>circFANCB</i> | miR-3662                  | 2 |
| <i>circFANCB</i> | miR-3667-5p               | 1 |

|                  |                           |   |
|------------------|---------------------------|---|
| <i>circFANCB</i> | miR-3671                  | 1 |
| <i>circFANCB</i> | miR-3675-3p               | 3 |
| <i>circFANCB</i> | miR-3678-3p               | 5 |
| <i>circFANCB</i> | miR-3680-3p               | 5 |
| <i>circFANCB</i> | miR-3685                  | 2 |
| <i>circFANCB</i> | miR-3688-3p               | 2 |
| <i>circFANCB</i> | miR-3688-5p               | 1 |
| <i>circFANCB</i> | miR-369-3p                | 3 |
| <i>circFANCB</i> | miR-3692-5p               | 1 |
| <i>circFANCB</i> | miR-371-5p                | 3 |
| <i>circFANCB</i> | miR-371a-3p               | 2 |
| <i>circFANCB</i> | miR-371b-3p               | 2 |
| <i>circFANCB</i> | miR-371b-5p/373-5p/616-5p | 3 |
| <i>circFANCB</i> | miR-372-5p                | 3 |
| <i>circFANCB</i> | miR-374a-3p               | 4 |
| <i>circFANCB</i> | miR-375                   | 4 |
| <i>circFANCB</i> | miR-382-3p                | 1 |
| <i>circFANCB</i> | miR-382-5p                | 3 |
| <i>circFANCB</i> | miR-383-3p                | 3 |
| <i>circFANCB</i> | miR-384                   | 2 |
| <i>circFANCB</i> | miR-3908                  | 4 |
| <i>circFANCB</i> | miR-3911                  | 3 |
| <i>circFANCB</i> | miR-3914                  | 4 |
| <i>circFANCB</i> | miR-3919                  | 3 |
| <i>circFANCB</i> | miR-3923                  | 2 |
| <i>circFANCB</i> | miR-3925-3p               | 1 |
| <i>circFANCB</i> | miR-3925-5p               | 6 |
| <i>circFANCB</i> | miR-3928-3p               | 5 |
| <i>circFANCB</i> | miR-3942-3p               | 6 |
| <i>circFANCB</i> | miR-3942-5p               | 4 |
| <i>circFANCB</i> | miR-3978                  | 2 |
| <i>circFANCB</i> | miR-409-3p                | 3 |
| <i>circFANCB</i> | miR-412-3p/6754-3p        | 2 |
| <i>circFANCB</i> | miR-4257                  | 5 |
| <i>circFANCB</i> | miR-4261                  | 2 |
| <i>circFANCB</i> | miR-4263                  | 1 |
| <i>circFANCB</i> | miR-4272                  | 1 |
| <i>circFANCB</i> | miR-4280                  | 1 |

|                  |                       |   |
|------------------|-----------------------|---|
| <i>circFANCB</i> | miR-4281              | 1 |
| <i>circFANCB</i> | miR-4287/4685-3p      | 3 |
| <i>circFANCB</i> | miR-4289              | 2 |
| <i>circFANCB</i> | miR-4297/5581-5p      | 3 |
| <i>circFANCB</i> | miR-4310/7157-5p      | 2 |
| <i>circFANCB</i> | miR-4311              | 6 |
| <i>circFANCB</i> | miR-432-5p            | 2 |
| <i>circFANCB</i> | miR-4325              | 2 |
| <i>circFANCB</i> | miR-4422              | 4 |
| <i>circFANCB</i> | miR-4427              | 2 |
| <i>circFANCB</i> | miR-4434/4516/5703    | 2 |
| <i>circFANCB</i> | miR-4446-5p           | 1 |
| <i>circFANCB</i> | miR-4452              | 1 |
| <i>circFANCB</i> | miR-4469              | 3 |
| <i>circFANCB</i> | miR-4474-3p           | 2 |
| <i>circFANCB</i> | miR-4475              | 3 |
| <i>circFANCB</i> | miR-4476/6876-5p      | 4 |
| <i>circFANCB</i> | miR-4482-3p           | 1 |
| <i>circFANCB</i> | miR-4496              | 8 |
| <i>circFANCB</i> | miR-4501              | 3 |
| <i>circFANCB</i> | miR-4509              | 5 |
| <i>circFANCB</i> | miR-450b-5p           | 5 |
| <i>circFANCB</i> | miR-4511              | 2 |
| <i>circFANCB</i> | miR-4517              | 2 |
| <i>circFANCB</i> | miR-452-5p/892-3p     | 2 |
| <i>circFANCB</i> | miR-4524b-3p          | 2 |
| <i>circFANCB</i> | miR-4530              | 1 |
| <i>circFANCB</i> | miR-4531              | 4 |
| <i>circFANCB</i> | miR-4536-5p           | 1 |
| <i>circFANCB</i> | miR-4633-5p           | 1 |
| <i>circFANCB</i> | miR-4639-3p           | 1 |
| <i>circFANCB</i> | miR-4641              | 1 |
| <i>circFANCB</i> | miR-4642              | 2 |
| <i>circFANCB</i> | miR-4655-5p           | 1 |
| <i>circFANCB</i> | miR-4659a-3p/4659b-3p | 4 |
| <i>circFANCB</i> | miR-4659a-5p/4659b-5p | 3 |
| <i>circFANCB</i> | miR-466               | 4 |
| <i>circFANCB</i> | miR-4668-3p           | 7 |

|                  |                     |   |
|------------------|---------------------|---|
| <i>circFANCB</i> | miR-4668-5p         | 3 |
| <i>circFANCB</i> | miR-4670-3p         | 1 |
| <i>circFANCB</i> | miR-4680-3p         | 2 |
| <i>circFANCB</i> | miR-4684-3p         | 3 |
| <i>circFANCB</i> | miR-4696            | 1 |
| <i>circFANCB</i> | miR-4698            | 3 |
| <i>circFANCB</i> | miR-4699-3p         | 2 |
| <i>circFANCB</i> | miR-4699-5p         | 4 |
| <i>circFANCB</i> | miR-4713-5p         | 2 |
| <i>circFANCB</i> | miR-4716-5p         | 1 |
| <i>circFANCB</i> | miR-4717-3p         | 1 |
| <i>circFANCB</i> | miR-4718            | 2 |
| <i>circFANCB</i> | miR-4727-5p         | 2 |
| <i>circFANCB</i> | miR-4729            | 4 |
| <i>circFANCB</i> | miR-4732-3p         | 3 |
| <i>circFANCB</i> | miR-4735-5p         | 2 |
| <i>circFANCB</i> | miR-4744            | 5 |
| <i>circFANCB</i> | miR-4747-5p/5196-5p | 4 |
| <i>circFANCB</i> | miR-4753-3p         | 5 |
| <i>circFANCB</i> | miR-4756-3p         | 3 |
| <i>circFANCB</i> | miR-4760-3p         | 1 |
| <i>circFANCB</i> | miR-4762-5p         | 2 |
| <i>circFANCB</i> | miR-4766-3p         | 3 |
| <i>circFANCB</i> | miR-4768-5p/6833-3p | 3 |
| <i>circFANCB</i> | miR-4769-3p/6817-5p | 2 |
| <i>circFANCB</i> | miR-4773            | 3 |
| <i>circFANCB</i> | miR-4777-5p         | 2 |
| <i>circFANCB</i> | miR-4778-3p         | 4 |
| <i>circFANCB</i> | miR-4781-3p         | 3 |
| <i>circFANCB</i> | miR-4795-5p         | 6 |
| <i>circFANCB</i> | miR-4797-5p         | 3 |
| <i>circFANCB</i> | miR-4799-5p         | 5 |
| <i>circFANCB</i> | miR-4802-3p         | 1 |
| <i>circFANCB</i> | miR-4802-5p         | 2 |
| <i>circFANCB</i> | miR-4803            | 1 |
| <i>circFANCB</i> | miR-488-3p          | 5 |
| <i>circFANCB</i> | miR-488-5p          | 1 |
| <i>circFANCB</i> | miR-489-3p          | 1 |

|                  |                                      |   |
|------------------|--------------------------------------|---|
| <i>circFANCB</i> | miR-490-5p                           | 1 |
| <i>circFANCB</i> | miR-491-3p                           | 3 |
| <i>circFANCB</i> | miR-493-3p                           | 1 |
| <i>circFANCB</i> | miR-493-5p                           | 2 |
| <i>circFANCB</i> | miR-494-3p                           | 4 |
| <i>circFANCB</i> | miR-495-5p                           | 3 |
| <i>circFANCB</i> | miR-4999-5p                          | 2 |
| <i>circFANCB</i> | miR-499a-3p/499b-3p                  | 3 |
| <i>circFANCB</i> | miR-5001-3p                          | 2 |
| <i>circFANCB</i> | miR-5003-3p                          | 4 |
| <i>circFANCB</i> | miR-5009-3p                          | 3 |
| <i>circFANCB</i> | miR-500a-5p                          | 2 |
| <i>circFANCB</i> | miR-500b-3p                          | 3 |
| <i>circFANCB</i> | miR-501-5p                           | 4 |
| <i>circFANCB</i> | miR-5010-3p                          | 5 |
| <i>circFANCB</i> | miR-506-5p                           | 4 |
| <i>circFANCB</i> | miR-507/557                          | 5 |
| <i>circFANCB</i> | miR-508-5p                           | 1 |
| <i>circFANCB</i> | miR-5089-3p                          | 1 |
| <i>circFANCB</i> | miR-509-3p                           | 1 |
| <i>circFANCB</i> | miR-5096                             | 1 |
| <i>circFANCB</i> | miR-513a-3p/513c-3p/3606-3p          | 6 |
| <i>circFANCB</i> | miR-5187-3p                          | 2 |
| <i>circFANCB</i> | miR-518a-5p/527                      | 1 |
| <i>circFANCB</i> | miR-518d-5p/519-5p                   | 2 |
| <i>circFANCB</i> | miR-5192                             | 2 |
| <i>circFANCB</i> | miR-5195-5p                          | 1 |
| <i>circFANCB</i> | miR-5197-3p                          | 7 |
| <i>circFANCB</i> | miR-524-5p                           | 5 |
| <i>circFANCB</i> | miR-525-5p                           | 2 |
| <i>circFANCB</i> | miR-539-5p                           | 2 |
| <i>circFANCB</i> | miR-541-5p                           | 1 |
| <i>circFANCB</i> | miR-543                              | 1 |
| <i>circFANCB</i> | miR-544a                             | 2 |
| <i>circFANCB</i> | miR-545-5p                           | 1 |
| <i>circFANCB</i> | miR-548ah-5p/3609                    | 2 |
| <i>circFANCB</i> | miR-548aj-5p/548f-5p/548g-5p/548x-5p | 1 |
| <i>circFANCB</i> | miR-548ao-3p                         | 1 |

|                  |                               |   |
|------------------|-------------------------------|---|
| <i>circFANCB</i> | miR-548ao-5p/548ax            | 2 |
| <i>circFANCB</i> | miR-548av-3p                  | 3 |
| <i>circFANCB</i> | miR-548aw                     | 1 |
| <i>circFANCB</i> | miR-548b-3p                   | 2 |
| <i>circFANCB</i> | miR-548c-3p                   | 7 |
| <i>circFANCB</i> | miR-548e-5p                   | 1 |
| <i>circFANCB</i> | miR-548g-3p                   | 6 |
| <i>circFANCB</i> | miR-548p                      | 5 |
| <i>circFANCB</i> | miR-548u/7161-5p              | 3 |
| <i>circFANCB</i> | miR-548v                      | 1 |
| <i>circFANCB</i> | miR-550a-3-5p/550a-5p/1271-3p | 2 |
| <i>circFANCB</i> | miR-551b-5p                   | 5 |
| <i>circFANCB</i> | miR-552-5p                    | 1 |
| <i>circFANCB</i> | miR-554                       | 2 |
| <i>circFANCB</i> | miR-5571-5p                   | 3 |
| <i>circFANCB</i> | miR-5580-3p                   | 2 |
| <i>circFANCB</i> | miR-5583-3p                   | 2 |
| <i>circFANCB</i> | miR-5584-3p                   | 2 |
| <i>circFANCB</i> | miR-5584-5p                   | 2 |
| <i>circFANCB</i> | miR-5585-5p                   | 2 |
| <i>circFANCB</i> | miR-5586-3p                   | 2 |
| <i>circFANCB</i> | miR-5589-3p                   | 1 |
| <i>circFANCB</i> | miR-5590-5p                   | 3 |
| <i>circFANCB</i> | miR-5683                      | 1 |
| <i>circFANCB</i> | miR-5687                      | 1 |
| <i>circFANCB</i> | miR-569                       | 1 |
| <i>circFANCB</i> | miR-5692a                     | 4 |
| <i>circFANCB</i> | miR-5692bc                    | 3 |
| <i>circFANCB</i> | miR-573/3616-5p               | 2 |
| <i>circFANCB</i> | miR-574-5p                    | 1 |
| <i>circFANCB</i> | miR-576-5p                    | 1 |
| <i>circFANCB</i> | miR-577                       | 3 |
| <i>circFANCB</i> | miR-578                       | 1 |
| <i>circFANCB</i> | miR-580-3p                    | 2 |
| <i>circFANCB</i> | miR-580-5p                    | 1 |
| <i>circFANCB</i> | miR-583                       | 6 |
| <i>circFANCB</i> | miR-584-3p                    | 3 |
| <i>circFANCB</i> | miR-587                       | 2 |



|                  |                    |    |
|------------------|--------------------|----|
| <i>circFANCB</i> | miR-589-5p         | 1  |
| <i>circFANCB</i> | miR-590-3p         | 8  |
| <i>circFANCB</i> | miR-592            | 4  |
| <i>circFANCB</i> | miR-595            | 2  |
| <i>circFANCB</i> | miR-597-5p         | 3  |
| <i>circFANCB</i> | miR-599            | 4  |
| <i>circFANCB</i> | miR-604            | 2  |
| <i>circFANCB</i> | miR-605-5p         | 1  |
| <i>circFANCB</i> | miR-607            | 3  |
| <i>circFANCB</i> | miR-6073           | 2  |
| <i>circFANCB</i> | miR-6077           | 3  |
| <i>circFANCB</i> | miR-6079           | 3  |
| <i>circFANCB</i> | miR-6124           | 6  |
| <i>circFANCB</i> | miR-6126           | 2  |
| <i>circFANCB</i> | miR-6134           | 2  |
| <i>circFANCB</i> | miR-619-5p/6506-5p | 1  |
| <i>circFANCB</i> | miR-624-5p         | 1  |
| <i>circFANCB</i> | miR-629-3p         | 2  |
| <i>circFANCB</i> | miR-644a           | 3  |
| <i>circFANCB</i> | miR-648            | 3  |
| <i>circFANCB</i> | miR-6500-3p        | 1  |
| <i>circFANCB</i> | miR-6507-5p        | 7  |
| <i>circFANCB</i> | miR-6508-5p/8067   | 2  |
| <i>circFANCB</i> | miR-651-3p         | 11 |
| <i>circFANCB</i> | miR-6512-5p        | 1  |
| <i>circFANCB</i> | miR-6514-5p        | 2  |
| <i>circFANCB</i> | miR-6515-3p        | 2  |
| <i>circFANCB</i> | miR-6516-5p        | 3  |
| <i>circFANCB</i> | miR-660-5p         | 3  |
| <i>circFANCB</i> | miR-670-3p         | 5  |
| <i>circFANCB</i> | miR-670-5p         | 1  |
| <i>circFANCB</i> | miR-671-5p         | 1  |
| <i>circFANCB</i> | miR-6715b-3p       | 3  |
| <i>circFANCB</i> | miR-6719-3p        | 1  |
| <i>circFANCB</i> | miR-6729-3p        | 2  |
| <i>circFANCB</i> | miR-6730-3p        | 1  |
| <i>circFANCB</i> | miR-6731-3p        | 3  |
| <i>circFANCB</i> | miR-6738-3p        | 2  |

|                  |                     |   |
|------------------|---------------------|---|
| <i>circFANCB</i> | miR-6750-5p/6822-5p | 2 |
| <i>circFANCB</i> | miR-6757-5p         | 1 |
| <i>circFANCB</i> | miR-6758-5p/6856-5p | 3 |
| <i>circFANCB</i> | miR-676-3p          | 1 |
| <i>circFANCB</i> | miR-676-5p          | 1 |
| <i>circFANCB</i> | miR-6760-3p         | 1 |
| <i>circFANCB</i> | miR-6762-3p         | 2 |
| <i>circFANCB</i> | miR-6770-5p         | 3 |
| <i>circFANCB</i> | miR-6801-3p/6810-3p | 1 |
| <i>circFANCB</i> | miR-6802-3p         | 3 |
| <i>circFANCB</i> | miR-6808-3p         | 1 |
| <i>circFANCB</i> | miR-6809-3p         | 3 |
| <i>circFANCB</i> | miR-6815-3p         | 1 |
| <i>circFANCB</i> | miR-6818-5p         | 4 |
| <i>circFANCB</i> | miR-6822-3p         | 3 |
| <i>circFANCB</i> | miR-6827-5p         | 2 |
| <i>circFANCB</i> | miR-6828-5p         | 1 |
| <i>circFANCB</i> | miR-6837-3p         | 2 |
| <i>circFANCB</i> | miR-6846-3p         | 1 |
| <i>circFANCB</i> | miR-6847-5p         | 5 |
| <i>circFANCB</i> | miR-6859-3p         | 1 |
| <i>circFANCB</i> | miR-6864-5p         | 2 |
| <i>circFANCB</i> | miR-6865-3p         | 2 |
| <i>circFANCB</i> | miR-6867-3p         | 2 |
| <i>circFANCB</i> | miR-6867-5p         | 4 |
| <i>circFANCB</i> | miR-6869-5p         | 1 |
| <i>circFANCB</i> | miR-6870-3p         | 2 |
| <i>circFANCB</i> | miR-6871-3p         | 1 |
| <i>circFANCB</i> | miR-6871-5p         | 2 |
| <i>circFANCB</i> | miR-6875-3p         | 4 |
| <i>circFANCB</i> | miR-6879-3p         | 2 |
| <i>circFANCB</i> | miR-6883-3p         | 4 |
| <i>circFANCB</i> | miR-7-5p            | 3 |
| <i>circFANCB</i> | miR-708-3p          | 3 |
| <i>circFANCB</i> | miR-7108-5p         | 2 |
| <i>circFANCB</i> | miR-7113-3p         | 3 |
| <i>circFANCB</i> | miR-7150            | 1 |
| <i>circFANCB</i> | miR-7151-5p         | 2 |

|                  |              |   |
|------------------|--------------|---|
| <i>circFANCB</i> | miR-7156-3p  | 1 |
| <i>circFANCB</i> | miR-7159-3p  | 1 |
| <i>circFANCB</i> | miR-7161-3p  | 2 |
| <i>circFANCB</i> | miR-744-3p   | 4 |
| <i>circFANCB</i> | miR-7515     | 3 |
| <i>circFANCB</i> | miR-758-3p   | 3 |
| <i>circFANCB</i> | miR-759      | 1 |
| <i>circFANCB</i> | miR-760      | 3 |
| <i>circFANCB</i> | miR-766-3p   | 1 |
| <i>circFANCB</i> | miR-767-5p   | 1 |
| <i>circFANCB</i> | miR-770-5p   | 1 |
| <i>circFANCB</i> | miR-7703     | 2 |
| <i>circFANCB</i> | miR-7705     | 3 |
| <i>circFANCB</i> | miR-7850-5p  | 4 |
| <i>circFANCB</i> | miR-7854-3p  | 2 |
| <i>circFANCB</i> | miR-7856-5p  | 2 |
| <i>circFANCB</i> | miR-7976     | 1 |
| <i>circFANCB</i> | miR-7977     | 1 |
| <i>circFANCB</i> | miR-802      | 1 |
| <i>circFANCB</i> | miR-8057     | 1 |
| <i>circFANCB</i> | miR-8060     | 2 |
| <i>circFANCB</i> | miR-8063     | 3 |
| <i>circFANCB</i> | miR-8066     | 2 |
| <i>circFANCB</i> | miR-8068     | 2 |
| <i>circFANCB</i> | miR-8074     | 2 |
| <i>circFANCB</i> | miR-8076     | 3 |
| <i>circFANCB</i> | miR-8078     | 1 |
| <i>circFANCB</i> | miR-8081     | 2 |
| <i>circFANCB</i> | miR-873-5p.1 | 2 |
| <i>circFANCB</i> | miR-874-3p   | 2 |
| <i>circFANCB</i> | miR-876-5p   | 2 |
| <i>circFANCB</i> | miR-888-3p   | 1 |
| <i>circFANCB</i> | miR-889-3p   | 2 |
| <i>circFANCB</i> | miR-890      | 1 |
| <i>circFANCB</i> | miR-891a-3p  | 1 |
| <i>circFANCB</i> | miR-892-5p   | 4 |
| <i>circFANCB</i> | miR-892b     | 4 |
| <i>circFANCB</i> | miR-9-5p     | 2 |

|                  |                                     |   |
|------------------|-------------------------------------|---|
| <i>circFANCB</i> | miR-93-3p                           | 1 |
| <i>circFANCB</i> | miR-941                             | 1 |
| <i>circFANCB</i> | miR-942-5p                          | 3 |
| <i>circFANCB</i> | miR-944                             | 2 |
| <i>circFANCB</i> | miR-9500                            | 2 |
| <i>circFANCB</i> | miR-1-3p/206                        | 4 |
| <i>circFANCB</i> | miR-106a-3p                         | 2 |
| <i>circFANCB</i> | miR-122-5p                          | 1 |
| <i>circFANCB</i> | miR-1236-5p                         | 2 |
| <i>circFANCB</i> | miR-1251-5p                         | 1 |
| <i>circFANCB</i> | miR-126-5p                          | 2 |
| <i>circFANCB</i> | miR-1267                            | 1 |
| <i>circFANCB</i> | miR-127-3p                          | 1 |
| <i>circFANCB</i> | miR-127-5p                          | 1 |
| <i>circFANCB</i> | miR-1273g-5p                        | 1 |
| <i>circFANCB</i> | miR-1278                            | 3 |
| <i>circFANCB</i> | miR-1288-3p                         | 1 |
| <i>circFANCB</i> | miR-130-3p/301-3p/454-3p            | 1 |
| <i>circFANCB</i> | miR-1306-5p                         | 1 |
| <i>circFANCB</i> | miR-140-5p                          | 1 |
| <i>circFANCB</i> | miR-153-5p                          | 3 |
| <i>circFANCB</i> | miR-155-3p                          | 1 |
| <i>circFANCB</i> | miR-182-3p                          | 1 |
| <i>circFANCB</i> | miR-190-5p                          | 1 |
| <i>circFANCB</i> | miR-191-5p                          | 1 |
| <i>circFANCB</i> | miR-200ab-5p                        | 2 |
| <i>circFANCB</i> | miR-203a-5p                         | 1 |
| <i>circFANCB</i> | miR-203b-3p                         | 1 |
| <i>circFANCB</i> | miR-205-3p                          | 4 |
| <i>circFANCB</i> | miR-2054                            | 1 |
| <i>circFANCB</i> | miR-21-5p/590-5p                    | 1 |
| <i>circFANCB</i> | miR-218-1-3p                        | 1 |
| <i>circFANCB</i> | miR-218-2-3p                        | 1 |
| <i>circFANCB</i> | miR-23-5p                           | 1 |
| <i>circFANCB</i> | miR-25-3p/32-5p/92-3p/363-3p/367-3p | 1 |
| <i>circFANCB</i> | miR-26-5p                           | 1 |
| <i>circFANCB</i> | miR-302-3p/372-3p/373-3p/520-3p     | 1 |
| <i>circFANCB</i> | miR-302b-5p/302d-5p                 | 2 |

|                  |                           |   |
|------------------|---------------------------|---|
| <i>circFANCB</i> | miR-3150b-3p              | 1 |
| <i>circFANCB</i> | miR-3169                  | 2 |
| <i>circFANCB</i> | miR-3190-3p               | 3 |
| <i>circFANCB</i> | miR-3198/4309             | 1 |
| <i>circFANCB</i> | miR-320e                  | 1 |
| <i>circFANCB</i> | miR-323a-5p               | 1 |
| <i>circFANCB</i> | miR-323b-5p/410-5p/494-5p | 1 |
| <i>circFANCB</i> | miR-325                   | 1 |
| <i>circFANCB</i> | miR-330-3p                | 2 |
| <i>circFANCB</i> | miR-335-5p                | 2 |
| <i>circFANCB</i> | miR-367-5p                | 1 |
| <i>circFANCB</i> | miR-3681-5p               | 1 |
| <i>circFANCB</i> | miR-3682-3p               | 2 |
| <i>circFANCB</i> | miR-3692-3p               | 1 |
| <i>circFANCB</i> | miR-374-5p/655-3p         | 1 |
| <i>circFANCB</i> | miR-374c-3p               | 1 |
| <i>circFANCB</i> | miR-3912-5p               | 1 |
| <i>circFANCB</i> | miR-3928-5p/6806-3p       | 1 |
| <i>circFANCB</i> | miR-3944-5p               | 2 |
| <i>circFANCB</i> | miR-411-5p.1              | 2 |
| <i>circFANCB</i> | miR-411-5p.2              | 1 |
| <i>circFANCB</i> | miR-425-3p                | 1 |
| <i>circFANCB</i> | miR-4282                  | 5 |
| <i>circFANCB</i> | miR-4299                  | 1 |
| <i>circFANCB</i> | miR-431-5p                | 1 |
| <i>circFANCB</i> | miR-4326                  | 1 |
| <i>circFANCB</i> | miR-4330                  | 1 |
| <i>circFANCB</i> | miR-4426/4647/4662b       | 2 |
| <i>circFANCB</i> | miR-4453/4538             | 1 |
| <i>circFANCB</i> | miR-4456                  | 1 |
| <i>circFANCB</i> | miR-4463                  | 1 |
| <i>circFANCB</i> | miR-4477b                 | 2 |
| <i>circFANCB</i> | miR-4494                  | 1 |
| <i>circFANCB</i> | miR-4499                  | 1 |
| <i>circFANCB</i> | miR-4506                  | 3 |
| <i>circFANCB</i> | miR-4513/6855-3p          | 1 |
| <i>circFANCB</i> | miR-4515                  | 1 |
| <i>circFANCB</i> | miR-4539                  | 1 |

|                  |                                                                  |   |
|------------------|------------------------------------------------------------------|---|
| <i>circFANCB</i> | miR-4635                                                         | 2 |
| <i>circFANCB</i> | miR-4639-5p                                                      | 1 |
| <i>circFANCB</i> | miR-4652-3p                                                      | 1 |
| <i>circFANCB</i> | miR-4662a-3p                                                     | 1 |
| <i>circFANCB</i> | miR-4680-5p                                                      | 2 |
| <i>circFANCB</i> | miR-4693-3p                                                      | 1 |
| <i>circFANCB</i> | miR-4694-3p                                                      | 1 |
| <i>circFANCB</i> | miR-4700-3p                                                      | 1 |
| <i>circFANCB</i> | miR-4709-3p                                                      | 3 |
| <i>circFANCB</i> | miR-4720-3p                                                      | 1 |
| <i>circFANCB</i> | miR-4724-5p                                                      | 2 |
| <i>circFANCB</i> | miR-4732-5p                                                      | 1 |
| <i>circFANCB</i> | miR-4740-5p                                                      | 1 |
| <i>circFANCB</i> | miR-4743-3p                                                      | 1 |
| <i>circFANCB</i> | miR-4759                                                         | 2 |
| <i>circFANCB</i> | miR-4760-5p/8061                                                 | 3 |
| <i>circFANCB</i> | miR-4765                                                         | 2 |
| <i>circFANCB</i> | miR-4766-5p                                                      | 1 |
| <i>circFANCB</i> | miR-4778-5p                                                      | 1 |
| <i>circFANCB</i> | miR-4804-3p                                                      | 1 |
| <i>circFANCB</i> | miR-483-3p.1                                                     | 3 |
| <i>circFANCB</i> | miR-498                                                          | 2 |
| <i>circFANCB</i> | miR-499b-5p                                                      | 1 |
| <i>circFANCB</i> | miR-5000-3p                                                      | 1 |
| <i>circFANCB</i> | miR-5000-5p                                                      | 2 |
| <i>circFANCB</i> | miR-5002-3p                                                      | 1 |
| <i>circFANCB</i> | miR-502-5p                                                       | 4 |
| <i>circFANCB</i> | miR-5100                                                         | 3 |
| <i>circFANCB</i> | miR-511-5p                                                       | 1 |
| <i>circFANCB</i> | miR-512-5p                                                       | 1 |
| <i>circFANCB</i> | miR-513b-3p                                                      | 3 |
| <i>circFANCB</i> | miR-517-5p                                                       | 1 |
| <i>circFANCB</i> | miR-519-3p                                                       | 1 |
| <i>circFANCB</i> | miR-522-3p                                                       | 1 |
| <i>circFANCB</i> | miR-548ac/548bb-3p/548d-3p/548h-3p/548z                          | 1 |
| <i>circFANCB</i> | miR-548al/4445-3p                                                | 1 |
| <i>circFANCB</i> | miR-548aq-3p/548am-3p/548aj-3p/548ah-3p/548ae-3p/548j-3p/548x-3p | 3 |
| <i>circFANCB</i> | miR-548at-5p                                                     | 3 |

|                  |                                               |   |
|------------------|-----------------------------------------------|---|
| <i>circFANCB</i> | miR-548az-3p/548ar-3p/548a-3p/548e-3p/548f-3p |   |
| <i>circFANCB</i> | miR-548az-5p/548t-5p                          | 3 |
| <i>circFANCB</i> | miR-548n                                      | 3 |
| <i>circFANCB</i> | miR-548q                                      | 1 |
| <i>circFANCB</i> | miR-5579-3p                                   | 2 |
| <i>circFANCB</i> | miR-5579-5p                                   | 3 |
| <i>circFANCB</i> | miR-5582-3p                                   | 3 |
| <i>circFANCB</i> | miR-561-3p                                    | 3 |
| <i>circFANCB</i> | miR-561-5p                                    | 1 |
| <i>circFANCB</i> | miR-5690                                      | 1 |
| <i>circFANCB</i> | miR-5696                                      | 3 |
| <i>circFANCB</i> | miR-5697                                      | 1 |
| <i>circFANCB</i> | miR-570-3p                                    | 2 |
| <i>circFANCB</i> | miR-579-3p                                    | 3 |
| <i>circFANCB</i> | miR-584-5p                                    | 2 |
| <i>circFANCB</i> | miR-589-3p                                    | 2 |
| <i>circFANCB</i> | miR-598-3p                                    | 1 |
| <i>circFANCB</i> | miR-606                                       | 1 |
| <i>circFANCB</i> | miR-6082                                      | 1 |
| <i>circFANCB</i> | miR-617                                       | 1 |
| <i>circFANCB</i> | miR-619-3p                                    | 1 |
| <i>circFANCB</i> | miR-627-3p                                    | 2 |
| <i>circFANCB</i> | miR-628-3p                                    | 1 |
| <i>circFANCB</i> | miR-633                                       | 1 |
| <i>circFANCB</i> | miR-641/3617-5p                               | 1 |
| <i>circFANCB</i> | miR-6505-3p                                   | 1 |
| <i>circFANCB</i> | miR-6513-3p                                   | 1 |
| <i>circFANCB</i> | miR-6514-3p                                   | 1 |
| <i>circFANCB</i> | miR-654-3p                                    | 1 |
| <i>circFANCB</i> | miR-659-3p                                    | 1 |
| <i>circFANCB</i> | miR-6716-5p                                   | 1 |
| <i>circFANCB</i> | miR-6739-3p                                   | 2 |
| <i>circFANCB</i> | miR-6750-3p                                   | 1 |
| <i>circFANCB</i> | miR-6771-5p                                   | 1 |
| <i>circFANCB</i> | miR-6780a-3p                                  | 2 |
| <i>circFANCB</i> | miR-6800-3p                                   | 2 |
| <i>circFANCB</i> | miR-6816-3p                                   | 1 |
| <i>circFANCB</i> | miR-6830-5p                                   | 1 |

|                  |                                       |   |
|------------------|---------------------------------------|---|
| <i>circFANCB</i> | miR-6832-5p                           | 1 |
| <i>circFANCB</i> | miR-6844                              | 2 |
| <i>circFANCB</i> | miR-6857-3p                           | 1 |
| <i>circFANCB</i> | miR-6881-3p                           | 2 |
| <i>circFANCB</i> | miR-6882-5p                           | 1 |
| <i>circFANCB</i> | miR-6884-3p                           | 1 |
| <i>circFANCB</i> | miR-6888-3p                           | 1 |
| <i>circFANCB</i> | miR-6888-5p                           | 1 |
| <i>circFANCB</i> | miR-6894-3p                           | 1 |
| <i>circFANCB</i> | miR-7-3p                              | 6 |
| <i>circFANCB</i> | miR-7111-3p                           | 2 |
| <i>circFANCB</i> | miR-7158-3p                           | 1 |
| <i>circFANCB</i> | miR-7843-3p                           | 1 |
| <i>circFANCB</i> | miR-7844-5p                           | 3 |
| <i>circFANCB</i> | miR-7849-3p                           | 1 |
| <i>circFANCB</i> | miR-7851-3p                           | 1 |
| <i>circFANCB</i> | miR-7855-5p                           | 2 |
| <i>circFANCB</i> | miR-7978                              | 1 |
| <i>circFANCB</i> | miR-8080                              | 1 |
| <i>circFANCB</i> | miR-8083                              | 2 |
| <i>circFANCB</i> | miR-8086                              | 1 |
| <i>circFANCB</i> | miR-876-3p                            | 1 |
| <i>circFANCB</i> | miR-885-3p                            | 1 |
| <i>circFANCB</i> | let-7a-3p/let-7b-3p/let-7f-1-3p/98-3p | 1 |
| <i>circFANCB</i> | let-7f-2-3p/1185-3p                   | 1 |
| <i>circFANCB</i> | miR-101-3p.1                          | 1 |
| <i>circFANCB</i> | miR-1202/3972                         | 1 |
| <i>circFANCB</i> | miR-1207-3p                           | 1 |
| <i>circFANCB</i> | miR-1207-5p/4763-3p                   | 1 |
| <i>circFANCB</i> | miR-1224-5p                           | 1 |
| <i>circFANCB</i> | miR-1227-3p                           | 1 |
| <i>circFANCB</i> | miR-124-5p                            | 1 |
| <i>circFANCB</i> | miR-1243                              | 4 |
| <i>circFANCB</i> | miR-1245a/8079                        | 1 |
| <i>circFANCB</i> | miR-125a-3p                           | 1 |
| <i>circFANCB</i> | miR-1265                              | 1 |
| <i>circFANCB</i> | miR-1273e                             | 1 |
| <i>circFANCB</i> | miR-1273f                             | 1 |



|                  |                     |   |
|------------------|---------------------|---|
| <i>circFANCB</i> | miR-1273g-3p        | 1 |
| <i>circFANCB</i> | miR-1279            | 3 |
| <i>circFANCB</i> | miR-128-3p          | 1 |
| <i>circFANCB</i> | miR-1282            | 1 |
| <i>circFANCB</i> | miR-1291/6775-3p    | 1 |
| <i>circFANCB</i> | miR-1296-3p         | 1 |
| <i>circFANCB</i> | miR-139-3p          | 2 |
| <i>circFANCB</i> | miR-143-3p          | 1 |
| <i>circFANCB</i> | miR-143-5p          | 1 |
| <i>circFANCB</i> | miR-144-3p          | 1 |
| <i>circFANCB</i> | miR-155-5p          | 1 |
| <i>circFANCB</i> | miR-1827            | 1 |
| <i>circFANCB</i> | miR-19-3p           | 1 |
| <i>circFANCB</i> | miR-1909-3p/6722-3p | 1 |
| <i>circFANCB</i> | miR-190a-3p         | 1 |
| <i>circFANCB</i> | miR-193-3p          | 1 |
| <i>circFANCB</i> | miR-194-3p          | 1 |
| <i>circFANCB</i> | miR-1976            | 1 |
| <i>circFANCB</i> | miR-204-5p/211-5p   | 1 |
| <i>circFANCB</i> | miR-2110            | 2 |
| <i>circFANCB</i> | miR-2114-3p         | 3 |
| <i>circFANCB</i> | miR-2115-5p         | 1 |
| <i>circFANCB</i> | miR-214-3p/3619-5p  | 1 |
| <i>circFANCB</i> | miR-218-5p          | 1 |
| <i>circFANCB</i> | miR-224-5p          | 1 |
| <i>circFANCB</i> | miR-2681-3p         | 1 |
| <i>circFANCB</i> | miR-2681-5p         | 2 |
| <i>circFANCB</i> | miR-27-3p           | 1 |
| <i>circFANCB</i> | miR-297             | 1 |
| <i>circFANCB</i> | miR-299-5p          | 1 |
| <i>circFANCB</i> | miR-29a-5p          | 1 |
| <i>circFANCB</i> | miR-29b-2-5p        | 1 |
| <i>circFANCB</i> | miR-30-3p           | 2 |
| <i>circFANCB</i> | miR-3120-3p         | 1 |
| <i>circFANCB</i> | miR-3122/3913-5p    | 1 |
| <i>circFANCB</i> | miR-3128            | 1 |
| <i>circFANCB</i> | miR-3145-3p         | 2 |
| <i>circFANCB</i> | miR-3149            | 1 |

|                  |                                   |   |
|------------------|-----------------------------------|---|
| <i>circFANCB</i> | miR-3150a-3p                      | 2 |
| <i>circFANCB</i> | miR-3150a-5p/3150b-5p             | 2 |
| <i>circFANCB</i> | miR-3152-3p                       | 2 |
| <i>circFANCB</i> | miR-3163                          | 1 |
| <i>circFANCB</i> | miR-3165                          | 1 |
| <i>circFANCB</i> | miR-3175                          | 1 |
| <i>circFANCB</i> | miR-3193                          | 1 |
| <i>circFANCB</i> | miR-3194-5p                       | 1 |
| <i>circFANCB</i> | miR-3199/8052                     | 1 |
| <i>circFANCB</i> | miR-3200-5p                       | 1 |
| <i>circFANCB</i> | miR-323-3p                        | 1 |
| <i>circFANCB</i> | miR-323b-3p                       | 1 |
| <i>circFANCB</i> | miR-328-3p                        | 1 |
| <i>circFANCB</i> | miR-33-5p                         | 2 |
| <i>circFANCB</i> | miR-331-5p                        | 1 |
| <i>circFANCB</i> | miR-34a-3p                        | 3 |
| <i>circFANCB</i> | miR-3591-5p                       | 1 |
| <i>circFANCB</i> | miR-3612                          | 1 |
| <i>circFANCB</i> | miR-3613-5p                       | 1 |
| <i>circFANCB</i> | miR-3614-3p                       | 1 |
| <i>circFANCB</i> | miR-3617-3p                       | 3 |
| <i>circFANCB</i> | miR-3622b-5p                      | 1 |
| <i>circFANCB</i> | miR-3653-5p                       | 1 |
| <i>circFANCB</i> | miR-3654                          | 4 |
| <i>circFANCB</i> | miR-3658                          | 1 |
| <i>circFANCB</i> | miR-365a-5p/365b-5p               | 1 |
| <i>circFANCB</i> | miR-3675-5p                       | 2 |
| <i>circFANCB</i> | miR-3689a-5p/3689b-5p/3689e/3689f | 2 |
| <i>circFANCB</i> | miR-370-3p                        | 1 |
| <i>circFANCB</i> | miR-3713                          | 1 |
| <i>circFANCB</i> | miR-374-5p                        | 2 |
| <i>circFANCB</i> | miR-378j/6839-5p                  | 1 |
| <i>circFANCB</i> | miR-383-5p.1                      | 2 |
| <i>circFANCB</i> | miR-383-5p.2                      | 3 |
| <i>circFANCB</i> | miR-3915                          | 1 |
| <i>circFANCB</i> | miR-3920                          | 1 |
| <i>circFANCB</i> | miR-3924                          | 1 |
| <i>circFANCB</i> | miR-3934-5p                       | 1 |

|                  |                           |   |
|------------------|---------------------------|---|
| <i>circFANCB</i> | miR-3973                  | 1 |
| <i>circFANCB</i> | miR-4251                  | 1 |
| <i>circFANCB</i> | miR-4267                  | 1 |
| <i>circFANCB</i> | miR-4271/4725-3p/6780b-5p | 2 |
| <i>circFANCB</i> | miR-4274                  | 1 |
| <i>circFANCB</i> | miR-4276                  | 1 |
| <i>circFANCB</i> | miR-4277                  | 1 |
| <i>circFANCB</i> | miR-4291                  | 2 |
| <i>circFANCB</i> | miR-4302                  | 1 |
| <i>circFANCB</i> | miR-4303                  | 1 |
| <i>circFANCB</i> | miR-4307                  | 1 |
| <i>circFANCB</i> | miR-4317                  | 1 |
| <i>circFANCB</i> | miR-4318                  | 1 |
| <i>circFANCB</i> | miR-4320                  | 1 |
| <i>circFANCB</i> | miR-4329                  | 1 |
| <i>circFANCB</i> | miR-4417                  | 1 |
| <i>circFANCB</i> | miR-4432                  | 2 |
| <i>circFANCB</i> | miR-4436b-5p              | 1 |
| <i>circFANCB</i> | miR-4443                  | 2 |
| <i>circFANCB</i> | miR-4470                  | 1 |
| <i>circFANCB</i> | miR-4477a                 | 1 |
| <i>circFANCB</i> | miR-4484                  | 2 |
| <i>circFANCB</i> | miR-450a-1-3p             | 1 |
| <i>circFANCB</i> | miR-4519                  | 1 |
| <i>circFANCB</i> | miR-452-3p                | 2 |
| <i>circFANCB</i> | miR-4521                  | 1 |
| <i>circFANCB</i> | miR-4528                  | 1 |
| <i>circFANCB</i> | miR-455-3p.2              | 1 |
| <i>circFANCB</i> | miR-4649-3p               | 1 |
| <i>circFANCB</i> | miR-4661-5p               | 2 |
| <i>circFANCB</i> | miR-4666a-5p              | 2 |
| <i>circFANCB</i> | miR-4678                  | 1 |
| <i>circFANCB</i> | miR-4683                  | 2 |
| <i>circFANCB</i> | miR-4689/6858-5p          | 1 |
| <i>circFANCB</i> | miR-4691-5p/6792-3p       | 1 |
| <i>circFANCB</i> | miR-4708-5p               | 1 |
| <i>circFANCB</i> | miR-4712-3p               | 1 |
| <i>circFANCB</i> | miR-4719                  | 2 |

|                  |                                                                  |   |
|------------------|------------------------------------------------------------------|---|
| <i>circFANCB</i> | miR-4720-5p/4799-3p/5588-5p                                      | 1 |
| <i>circFANCB</i> | miR-4736                                                         | 1 |
| <i>circFANCB</i> | miR-4742-3p                                                      | 1 |
| <i>circFANCB</i> | miR-4752                                                         | 2 |
| <i>circFANCB</i> | miR-4772-5p                                                      | 2 |
| <i>circFANCB</i> | miR-4775                                                         | 1 |
| <i>circFANCB</i> | miR-4789-5p                                                      | 1 |
| <i>circFANCB</i> | miR-4790-3p                                                      | 3 |
| <i>circFANCB</i> | miR-495-3p                                                       | 2 |
| <i>circFANCB</i> | miR-496.2                                                        | 1 |
| <i>circFANCB</i> | miR-5002-5p                                                      | 2 |
| <i>circFANCB</i> | miR-5006-5p                                                      | 1 |
| <i>circFANCB</i> | miR-5011-5p                                                      | 1 |
| <i>circFANCB</i> | miR-504-3p                                                       | 1 |
| <i>circFANCB</i> | miR-505-5p                                                       | 2 |
| <i>circFANCB</i> | miR-5093                                                         | 2 |
| <i>circFANCB</i> | miR-510-3p                                                       | 5 |
| <i>circFANCB</i> | miR-511-3p                                                       | 2 |
| <i>circFANCB</i> | miR-513a-5p                                                      | 1 |
| <i>circFANCB</i> | miR-513c-5p/514b-5p                                              | 1 |
| <i>circFANCB</i> | miR-514a-3p                                                      | 2 |
| <i>circFANCB</i> | miR-516a-3p/516b-3p/7162-5p                                      | 1 |
| <i>circFANCB</i> | miR-5186                                                         | 1 |
| <i>circFANCB</i> | miR-5193                                                         | 1 |
| <i>circFANCB</i> | miR-5197-5p                                                      | 1 |
| <i>circFANCB</i> | miR-520g-3p                                                      | 1 |
| <i>circFANCB</i> | miR-526b-5p                                                      | 1 |
| <i>circFANCB</i> | miR-548an                                                        | 2 |
| <i>circFANCB</i> | miR-548ap-3p/548aa/548t-3p                                       | 1 |
| <i>circFANCB</i> | miR-548as-3p                                                     | 1 |
| <i>circFANCB</i> | miR-548av-5p/548k/8054                                           | 2 |
| <i>circFANCB</i> | miR-548ay-3p/548at-3p                                            | 1 |
| <i>circFANCB</i> | miR-548ay-5p/548au-5p/548as-5p/548ar-3p/548aq-5p/548ap-5p/548am- | 2 |
| <i>circFANCB</i> | miR-548l                                                         | 2 |
| <i>circFANCB</i> | miR-550b-2-5p                                                    | 1 |
| <i>circFANCB</i> | miR-550b-3p                                                      | 1 |
| <i>circFANCB</i> | miR-556-3p                                                       | 2 |
| <i>circFANCB</i> | miR-5585-3p                                                      | 1 |

|                  |                  |   |
|------------------|------------------|---|
| <i>circFANCB</i> | miR-562          | 1 |
| <i>circFANCB</i> | miR-568          | 1 |
| <i>circFANCB</i> | miR-5681a        | 2 |
| <i>circFANCB</i> | miR-5681b        | 2 |
| <i>circFANCB</i> | miR-5693         | 1 |
| <i>circFANCB</i> | miR-5694         | 3 |
| <i>circFANCB</i> | miR-5701         | 2 |
| <i>circFANCB</i> | miR-5707         | 1 |
| <i>circFANCB</i> | miR-581          | 4 |
| <i>circFANCB</i> | miR-6074         | 1 |
| <i>circFANCB</i> | miR-6083         | 1 |
| <i>circFANCB</i> | miR-6128         | 3 |
| <i>circFANCB</i> | miR-6132/6836-5p | 1 |
| <i>circFANCB</i> | miR-618          | 1 |
| <i>circFANCB</i> | miR-623          | 1 |
| <i>circFANCB</i> | miR-645          | 1 |
| <i>circFANCB</i> | miR-6499-3p      | 1 |
| <i>circFANCB</i> | miR-6503-3p      | 1 |
| <i>circFANCB</i> | miR-6504-3p      | 2 |
| <i>circFANCB</i> | miR-6505-5p      | 6 |
| <i>circFANCB</i> | miR-6507-3p      | 1 |
| <i>circFANCB</i> | miR-6509-3p      | 1 |
| <i>circFANCB</i> | miR-6509-5p      | 1 |
| <i>circFANCB</i> | miR-6513-5p      | 1 |
| <i>circFANCB</i> | miR-6515-5p      | 2 |
| <i>circFANCB</i> | miR-6516-3p      | 1 |
| <i>circFANCB</i> | miR-656-3p       | 2 |
| <i>circFANCB</i> | miR-660-3p       | 1 |
| <i>circFANCB</i> | miR-6721-5p      | 1 |
| <i>circFANCB</i> | miR-6730-5p      | 2 |
| <i>circFANCB</i> | miR-6731-5p/8085 | 1 |
| <i>circFANCB</i> | miR-6733-3p      | 1 |
| <i>circFANCB</i> | miR-6749-3p      | 1 |
| <i>circFANCB</i> | miR-675-3p       | 1 |
| <i>circFANCB</i> | miR-6755-3p      | 2 |
| <i>circFANCB</i> | miR-6758-3p      | 2 |
| <i>circFANCB</i> | miR-6761-5p      | 1 |
| <i>circFANCB</i> | miR-6768-3p      | 2 |

|                  |                     |   |
|------------------|---------------------|---|
| <i>circFANCB</i> | miR-6783-5p         | 1 |
| <i>circFANCB</i> | miR-6798-5p         | 1 |
| <i>circFANCB</i> | miR-6810-5p         | 2 |
| <i>circFANCB</i> | miR-6815-5p/6865-5p | 1 |
| <i>circFANCB</i> | miR-6825-5p         | 1 |
| <i>circFANCB</i> | miR-6831-3p         | 1 |
| <i>circFANCB</i> | miR-6832-3p         | 1 |
| <i>circFANCB</i> | miR-6833-5p         | 2 |
| <i>circFANCB</i> | miR-6838-3p         | 2 |
| <i>circFANCB</i> | miR-6851-3p         | 1 |
| <i>circFANCB</i> | miR-6854-3p         | 1 |
| <i>circFANCB</i> | miR-6857-5p         | 2 |
| <i>circFANCB</i> | miR-6868-3p         | 1 |
| <i>circFANCB</i> | miR-6868-5p         | 1 |
| <i>circFANCB</i> | miR-6873-3p         | 1 |
| <i>circFANCB</i> | miR-6878-3p         | 1 |
| <i>circFANCB</i> | miR-6878-5p         | 1 |
| <i>circFANCB</i> | miR-6880-5p         | 1 |
| <i>circFANCB</i> | miR-6886-3p         | 2 |
| <i>circFANCB</i> | miR-6890-5p         | 2 |
| <i>circFANCB</i> | miR-6892-5p         | 1 |
| <i>circFANCB</i> | miR-6894-5p         | 1 |
| <i>circFANCB</i> | miR-7154-3p         | 1 |
| <i>circFANCB</i> | miR-7162-3p         | 1 |
| <i>circFANCB</i> | miR-765             | 1 |
| <i>circFANCB</i> | miR-766-5p          | 1 |
| <i>circFANCB</i> | miR-7847-3p         | 1 |
| <i>circFANCB</i> | miR-8055            | 1 |
| <i>circFANCB</i> | miR-8062            | 1 |
| <i>circFANCB</i> | miR-8070            | 1 |
| <i>circFANCB</i> | miR-8071            | 1 |
| <i>circFANCB</i> | miR-8075            | 1 |
| <i>circFANCB</i> | miR-8087            | 2 |
| <i>circFANCB</i> | miR-875-3p          | 2 |
| <i>circFANCB</i> | miR-887-5p          | 1 |
| <i>circFANCB</i> | miR-888-5p          | 1 |
| <i>circFANCB</i> | miR-891b            | 2 |
| <i>circFANCB</i> | miR-892a            | 1 |

|                  |                    |   |
|------------------|--------------------|---|
| <i>circFANCB</i> | miR-922            | 1 |
| <i>circFANCB</i> | miR-935            | 3 |
| <i>circFANCB</i> | miR-938            | 2 |
| <i>circFANCB</i> | miR-939-5p/1343-5p | 1 |
| <i>circFANCB</i> | miR-95-5p          | 1 |
| <i>circFANCB</i> | miR-96-3p          | 1 |
| <i>circFANCB</i> | miR-7706           | 1 |
| <i>circFANCL</i> | miR-103-3p/107     | 1 |
| <i>circFANCL</i> | miR-103a-2-5p      | 1 |
| <i>circFANCL</i> | miR-1179           | 1 |
| <i>circFANCL</i> | miR-1184           | 1 |
| <i>circFANCL</i> | miR-1200           | 1 |
| <i>circFANCL</i> | miR-1205           | 1 |
| <i>circFANCL</i> | miR-1207-3p        | 1 |
| <i>circFANCL</i> | miR-1226-3p        | 1 |
| <i>circFANCL</i> | miR-1229-3p        | 1 |
| <i>circFANCL</i> | miR-124-3p.1       | 1 |
| <i>circFANCL</i> | miR-1250-3p        | 1 |
| <i>circFANCL</i> | miR-1252-3p        | 2 |
| <i>circFANCL</i> | miR-1254/3116      | 1 |
| <i>circFANCL</i> | miR-1255a/1255b-5p | 1 |
| <i>circFANCL</i> | miR-125a-3p        | 1 |
| <i>circFANCL</i> | miR-126-5p         | 2 |
| <i>circFANCL</i> | miR-1261           | 1 |
| <i>circFANCL</i> | miR-1265           | 1 |
| <i>circFANCL</i> | miR-1266-3p        | 1 |
| <i>circFANCL</i> | miR-1272           | 1 |
| <i>circFANCL</i> | miR-1273h-3p       | 1 |
| <i>circFANCL</i> | miR-1290           | 1 |
| <i>circFANCL</i> | miR-1301-3p        | 1 |
| <i>circFANCL</i> | miR-1306-5p        | 1 |
| <i>circFANCL</i> | miR-1322           | 1 |
| <i>circFANCL</i> | miR-1343-3p        | 2 |
| <i>circFANCL</i> | miR-137            | 1 |
| <i>circFANCL</i> | miR-142-3p.2       | 1 |
| <i>circFANCL</i> | miR-144-5p         | 1 |
| <i>circFANCL</i> | miR-145-3p         | 1 |
| <i>circFANCL</i> | miR-146-5p         | 1 |

|                  |                     |   |
|------------------|---------------------|---|
| <i>circFANCL</i> | miR-148b-5p/6874-3p | 1 |
| <i>circFANCL</i> | miR-150-5p          | 1 |
| <i>circFANCL</i> | miR-153-5p          | 1 |
| <i>circFANCL</i> | miR-1537-5p         | 2 |
| <i>circFANCL</i> | miR-1587/3620-5p    | 1 |
| <i>circFANCL</i> | miR-15b-3p          | 1 |
| <i>circFANCL</i> | miR-17-3p           | 1 |
| <i>circFANCL</i> | miR-181a-3p         | 1 |
| <i>circFANCL</i> | miR-181c-3p         | 1 |
| <i>circFANCL</i> | miR-182-5p          | 1 |
| <i>circFANCL</i> | miR-186-5p          | 3 |
| <i>circFANCL</i> | miR-19-5p           | 1 |
| <i>circFANCL</i> | miR-1911-3p         | 1 |
| <i>circFANCL</i> | miR-1915-3p/6764-5p | 1 |
| <i>circFANCL</i> | miR-197-3p          | 1 |
| <i>circFANCL</i> | miR-1976            | 4 |
| <i>circFANCL</i> | miR-200-3p/429      | 1 |
| <i>circFANCL</i> | miR-203a-3p.1       | 1 |
| <i>circFANCL</i> | miR-204-3p/4646-5p  | 1 |
| <i>circFANCL</i> | miR-2052            | 1 |
| <i>circFANCL</i> | miR-208-5p          | 1 |
| <i>circFANCL</i> | miR-2113            | 2 |
| <i>circFANCL</i> | miR-2116-3p         | 1 |
| <i>circFANCL</i> | miR-219a-1-3p       | 1 |
| <i>circFANCL</i> | miR-22-3p           | 1 |
| <i>circFANCL</i> | miR-221-5p/8073     | 1 |
| <i>circFANCL</i> | miR-222-5p          | 1 |
| <i>circFANCL</i> | miR-223-5p          | 1 |
| <i>circFANCL</i> | miR-2278            | 1 |
| <i>circFANCL</i> | miR-2355-5p         | 1 |
| <i>circFANCL</i> | miR-26-5p           | 2 |
| <i>circFANCL</i> | miR-26b-3p          | 1 |
| <i>circFANCL</i> | miR-27b-5p          | 1 |
| <i>circFANCL</i> | miR-297             | 2 |
| <i>circFANCL</i> | miR-298             | 2 |
| <i>circFANCL</i> | miR-302a-5p         | 1 |
| <i>circFANCL</i> | miR-302c-5p         | 1 |
| <i>circFANCL</i> | miR-3065-3p         | 1 |



|                  |                  |   |
|------------------|------------------|---|
| <i>circFANCL</i> | miR-3074-5p      | 1 |
| <i>circFANCL</i> | miR-3122/3913-5p | 1 |
| <i>circFANCL</i> | miR-3133         | 3 |
| <i>circFANCL</i> | miR-3134         | 1 |
| <i>circFANCL</i> | miR-3135a        | 1 |
| <i>circFANCL</i> | miR-3140-3p      | 1 |
| <i>circFANCL</i> | miR-3140-5p      | 1 |
| <i>circFANCL</i> | miR-3147         | 1 |
| <i>circFANCL</i> | miR-3151-3p      | 1 |
| <i>circFANCL</i> | miR-3152-5p      | 2 |
| <i>circFANCL</i> | miR-3157-5p      | 1 |
| <i>circFANCL</i> | miR-3158-5p      | 1 |
| <i>circFANCL</i> | miR-3160-3p      | 1 |
| <i>circFANCL</i> | miR-3168         | 1 |
| <i>circFANCL</i> | miR-3176/3922-3p | 1 |
| <i>circFANCL</i> | miR-3182         | 1 |
| <i>circFANCL</i> | miR-3190-5p      | 1 |
| <i>circFANCL</i> | miR-3192-5p      | 1 |
| <i>circFANCL</i> | miR-3193         | 2 |
| <i>circFANCL</i> | miR-3198/4309    | 1 |
| <i>circFANCL</i> | miR-330-3p.2     | 1 |
| <i>circFANCL</i> | miR-335-5p       | 1 |
| <i>circFANCL</i> | miR-338-5p       | 1 |
| <i>circFANCL</i> | miR-33a-3p       | 1 |
| <i>circFANCL</i> | miR-342-3p       | 1 |
| <i>circFANCL</i> | miR-345-3p       | 1 |
| <i>circFANCL</i> | miR-34b-3p       | 1 |
| <i>circFANCL</i> | miR-34c-3p       | 1 |
| <i>circFANCL</i> | miR-3529-3p      | 1 |
| <i>circFANCL</i> | miR-3591-5p      | 1 |
| <i>circFANCL</i> | miR-3614-3p      | 1 |
| <i>circFANCL</i> | miR-3646         | 2 |
| <i>circFANCL</i> | miR-3653-5p      | 4 |
| <i>circFANCL</i> | miR-3662         | 1 |
| <i>circFANCL</i> | miR-3668         | 1 |
| <i>circFANCL</i> | miR-3678-3p      | 1 |
| <i>circFANCL</i> | miR-3681-5p      | 1 |
| <i>circFANCL</i> | miR-3690         | 1 |

|                  |                       |   |
|------------------|-----------------------|---|
| <i>circFANCL</i> | miR-3691-5p           | 2 |
| <i>circFANCL</i> | miR-3692-3p           | 1 |
| <i>circFANCL</i> | miR-3692-5p           | 1 |
| <i>circFANCL</i> | miR-370-3p            | 1 |
| <i>circFANCL</i> | miR-3714              | 1 |
| <i>circFANCL</i> | miR-374b-3p           | 1 |
| <i>circFANCL</i> | miR-375               | 1 |
| <i>circFANCL</i> | miR-376b-5p/376c-5p   | 1 |
| <i>circFANCL</i> | miR-377-3p            | 1 |
| <i>circFANCL</i> | miR-378-3p            | 1 |
| <i>circFANCL</i> | miR-378a-5p           | 1 |
| <i>circFANCL</i> | miR-378g              | 1 |
| <i>circFANCL</i> | miR-379-5p            | 1 |
| <i>circFANCL</i> | miR-380-3p            | 1 |
| <i>circFANCL</i> | miR-382-3p            | 1 |
| <i>circFANCL</i> | miR-382-5p            | 2 |
| <i>circFANCL</i> | miR-383-3p            | 1 |
| <i>circFANCL</i> | miR-3910              | 1 |
| <i>circFANCL</i> | miR-3914              | 1 |
| <i>circFANCL</i> | miR-3924              | 1 |
| <i>circFANCL</i> | miR-3934-5p           | 1 |
| <i>circFANCL</i> | miR-3937              | 1 |
| <i>circFANCL</i> | miR-3977              | 2 |
| <i>circFANCL</i> | miR-4251              | 1 |
| <i>circFANCL</i> | miR-4254              | 1 |
| <i>circFANCL</i> | miR-4255              | 1 |
| <i>circFANCL</i> | miR-4259              | 1 |
| <i>circFANCL</i> | miR-4270/4441/6754-5p | 1 |
| <i>circFANCL</i> | miR-4277              | 1 |
| <i>circFANCL</i> | miR-4279              | 2 |
| <i>circFANCL</i> | miR-4307              | 1 |
| <i>circFANCL</i> | miR-4325              | 1 |
| <i>circFANCL</i> | miR-4329              | 1 |
| <i>circFANCL</i> | miR-4422              | 1 |
| <i>circFANCL</i> | miR-4423-5p           | 2 |
| <i>circFANCL</i> | miR-4425              | 1 |
| <i>circFANCL</i> | miR-4426/4647/4662b   | 2 |
| <i>circFANCL</i> | miR-4451              | 1 |

|                  |                       |   |
|------------------|-----------------------|---|
| <i>circFANCL</i> | miR-4460              | 1 |
| <i>circFANCL</i> | miR-4464/4748         | 1 |
| <i>circFANCL</i> | miR-4470              | 1 |
| <i>circFANCL</i> | miR-4476/6876-5p      | 1 |
| <i>circFANCL</i> | miR-4486              | 1 |
| <i>circFANCL</i> | miR-4487              | 1 |
| <i>circFANCL</i> | miR-4490              | 1 |
| <i>circFANCL</i> | miR-4493              | 1 |
| <i>circFANCL</i> | miR-450a-1-3p         | 1 |
| <i>circFANCL</i> | miR-450b-3p/769-3p    | 2 |
| <i>circFANCL</i> | miR-452-5p/892-3p     | 1 |
| <i>circFANCL</i> | miR-4520-3p           | 1 |
| <i>circFANCL</i> | miR-4524-5p           | 1 |
| <i>circFANCL</i> | miR-4534/8082         | 1 |
| <i>circFANCL</i> | miR-4638-3p           | 1 |
| <i>circFANCL</i> | miR-4639-3p           | 2 |
| <i>circFANCL</i> | miR-4645-5p/4673      | 1 |
| <i>circFANCL</i> | miR-4650-3p           | 1 |
| <i>circFANCL</i> | miR-4653-3p           | 1 |
| <i>circFANCL</i> | miR-4656              | 1 |
| <i>circFANCL</i> | miR-4659a-5p/4659b-5p | 1 |
| <i>circFANCL</i> | miR-4660              | 1 |
| <i>circFANCL</i> | miR-4663              | 1 |
| <i>circFANCL</i> | miR-4670-3p           | 1 |
| <i>circFANCL</i> | miR-4674              | 1 |
| <i>circFANCL</i> | miR-4675/4741         | 1 |
| <i>circFANCL</i> | miR-4680-5p           | 1 |
| <i>circFANCL</i> | miR-4691-5p/6792-3p   | 2 |
| <i>circFANCL</i> | miR-4693-5p           | 1 |
| <i>circFANCL</i> | miR-4694-5p           | 1 |
| <i>circFANCL</i> | miR-4698              | 1 |
| <i>circFANCL</i> | miR-4699-3p           | 1 |
| <i>circFANCL</i> | miR-4699-5p           | 3 |
| <i>circFANCL</i> | miR-4703-3p           | 1 |
| <i>circFANCL</i> | miR-4709-3p           | 3 |
| <i>circFANCL</i> | miR-4709-5p           | 1 |
| <i>circFANCL</i> | miR-4715-5p           | 1 |
| <i>circFANCL</i> | miR-4718              | 2 |

|                  |                     |   |
|------------------|---------------------|---|
| <i>circFANCL</i> | miR-4722-3p/6727-3p | 1 |
| <i>circFANCL</i> | miR-4726-3p         | 1 |
| <i>circFANCL</i> | miR-4727-3p         | 1 |
| <i>circFANCL</i> | miR-4728-3p         | 1 |
| <i>circFANCL</i> | miR-4729            | 1 |
| <i>circFANCL</i> | miR-4731-5p         | 1 |
| <i>circFANCL</i> | miR-4732-5p         | 1 |
| <i>circFANCL</i> | miR-4733-3p         | 1 |
| <i>circFANCL</i> | miR-4742-3p         | 2 |
| <i>circFANCL</i> | miR-4747-5p/5196-5p | 1 |
| <i>circFANCL</i> | miR-4752            | 1 |
| <i>circFANCL</i> | miR-4754            | 1 |
| <i>circFANCL</i> | miR-4761-5p         | 1 |
| <i>circFANCL</i> | miR-4766-5p         | 1 |
| <i>circFANCL</i> | miR-4769-3p/6817-5p | 1 |
| <i>circFANCL</i> | miR-4773            | 1 |
| <i>circFANCL</i> | miR-4774-3p         | 2 |
| <i>circFANCL</i> | miR-4774-5p         | 1 |
| <i>circFANCL</i> | miR-4777-3p         | 1 |
| <i>circFANCL</i> | miR-4795-3p         | 1 |
| <i>circFANCL</i> | miR-4802-5p         | 1 |
| <i>circFANCL</i> | miR-483-3p.1        | 1 |
| <i>circFANCL</i> | miR-483-3p.2        | 1 |
| <i>circFANCL</i> | miR-488-5p          | 1 |
| <i>circFANCL</i> | miR-495-5p          | 2 |
| <i>circFANCL</i> | miR-4999-3p         | 1 |
| <i>circFANCL</i> | miR-4999-5p         | 2 |
| <i>circFANCL</i> | miR-501-3p/502-3p   | 1 |
| <i>circFANCL</i> | miR-5010-3p         | 2 |
| <i>circFANCL</i> | miR-5089-5p         | 2 |
| <i>circFANCL</i> | miR-513c-5p/514b-5p | 1 |
| <i>circFANCL</i> | miR-5191            | 1 |
| <i>circFANCL</i> | miR-5193            | 3 |
| <i>circFANCL</i> | miR-5197-3p         | 1 |
| <i>circFANCL</i> | miR-532-3p          | 1 |
| <i>circFANCL</i> | miR-532-5p          | 1 |
| <i>circFANCL</i> | miR-548c-3p         | 1 |
| <i>circFANCL</i> | miR-548e-5p         | 1 |

|                  |                                      |   |
|------------------|--------------------------------------|---|
| <i>circFANCL</i> | miR-550a-3-5p/550a-5p/1271-3p        | 1 |
| <i>circFANCL</i> | miR-550b-2-5p                        | 1 |
| <i>circFANCL</i> | miR-552-3p                           | 1 |
| <i>circFANCL</i> | miR-556-5p                           | 1 |
| <i>circFANCL</i> | miR-558                              | 1 |
| <i>circFANCL</i> | miR-5584-3p                          | 1 |
| <i>circFANCL</i> | miR-5584-5p                          | 1 |
| <i>circFANCL</i> | miR-5585-3p                          | 1 |
| <i>circFANCL</i> | miR-5589-5p                          | 1 |
| <i>circFANCL</i> | miR-5590-5p                          | 1 |
| <i>circFANCL</i> | miR-5692a                            | 1 |
| <i>circFANCL</i> | miR-5696                             | 1 |
| <i>circFANCL</i> | miR-5700                             | 1 |
| <i>circFANCL</i> | miR-571                              | 1 |
| <i>circFANCL</i> | miR-579-3p                           | 1 |
| <i>circFANCL</i> | miR-580-3p                           | 1 |
| <i>circFANCL</i> | miR-580-5p                           | 1 |
| <i>circFANCL</i> | miR-581                              | 1 |
| <i>circFANCL</i> | miR-584-3p                           | 1 |
| <i>circFANCL</i> | miR-587                              | 1 |
| <i>circFANCL</i> | miR-589-5p                           | 1 |
| <i>circFANCL</i> | miR-592                              | 1 |
| <i>circFANCL</i> | miR-599                              | 1 |
| <i>circFANCL</i> | miR-605-3p                           | 1 |
| <i>circFANCL</i> | miR-6077                             | 1 |
| <i>circFANCL</i> | miR-612/1285-3p/3187-5p/5189-5p/6860 | 1 |
| <i>circFANCL</i> | miR-6126                             | 1 |
| <i>circFANCL</i> | miR-617                              | 1 |
| <i>circFANCL</i> | miR-618                              | 1 |
| <i>circFANCL</i> | miR-619-5p/6506-5p                   | 1 |
| <i>circFANCL</i> | miR-624-3p                           | 1 |
| <i>circFANCL</i> | miR-624-5p                           | 1 |
| <i>circFANCL</i> | miR-629-3p                           | 1 |
| <i>circFANCL</i> | miR-639                              | 1 |
| <i>circFANCL</i> | miR-6501-5p                          | 2 |
| <i>circFANCL</i> | miR-6505-3p                          | 1 |
| <i>circFANCL</i> | miR-6507-5p                          | 3 |
| <i>circFANCL</i> | miR-651-3p                           | 1 |

|                  |                     |   |
|------------------|---------------------|---|
| <i>circFANCL</i> | miR-651-5p          | 1 |
| <i>circFANCL</i> | miR-6513-5p         | 1 |
| <i>circFANCL</i> | miR-6514-3p         | 2 |
| <i>circFANCL</i> | miR-6514-5p         | 1 |
| <i>circFANCL</i> | miR-659-3p          | 1 |
| <i>circFANCL</i> | miR-660-3p          | 3 |
| <i>circFANCL</i> | miR-661             | 1 |
| <i>circFANCL</i> | miR-6728-5p         | 2 |
| <i>circFANCL</i> | miR-6742-3p         | 1 |
| <i>circFANCL</i> | miR-6744-5p         | 1 |
| <i>circFANCL</i> | miR-6747-3p         | 1 |
| <i>circFANCL</i> | miR-6749-3p         | 2 |
| <i>circFANCL</i> | miR-675-3p          | 2 |
| <i>circFANCL</i> | miR-6750-5p/6822-5p | 1 |
| <i>circFANCL</i> | miR-6758-5p/6856-5p | 1 |
| <i>circFANCL</i> | miR-6761-5p         | 1 |
| <i>circFANCL</i> | miR-6778-3p         | 2 |
| <i>circFANCL</i> | miR-6787-3p         | 1 |
| <i>circFANCL</i> | miR-6791-3p/6829-3p | 2 |
| <i>circFANCL</i> | miR-6794-3p         | 1 |
| <i>circFANCL</i> | miR-6819-3p/6877-3p | 1 |
| <i>circFANCL</i> | miR-6829-5p         | 1 |
| <i>circFANCL</i> | miR-6832-5p         | 1 |
| <i>circFANCL</i> | miR-6833-5p         | 1 |
| <i>circFANCL</i> | miR-6836-3p         | 2 |
| <i>circFANCL</i> | miR-6840-3p         | 1 |
| <i>circFANCL</i> | miR-6845-3p         | 1 |
| <i>circFANCL</i> | miR-6850-5p         | 1 |
| <i>circFANCL</i> | miR-6852-5p         | 1 |
| <i>circFANCL</i> | miR-6864-5p         | 1 |
| <i>circFANCL</i> | miR-6872-3p         | 1 |
| <i>circFANCL</i> | miR-6878-3p         | 1 |
| <i>circFANCL</i> | miR-6882-3p         | 1 |
| <i>circFANCL</i> | miR-6884-3p         | 1 |
| <i>circFANCL</i> | miR-6885-3p         | 1 |
| <i>circFANCL</i> | miR-6894-3p         | 2 |
| <i>circFANCL</i> | miR-7-5p            | 1 |
| <i>circFANCL</i> | miR-7109-3p         | 1 |

|                   |                                       |   |
|-------------------|---------------------------------------|---|
| <i>circFANCL</i>  | miR-7150                              | 1 |
| <i>circFANCL</i>  | miR-7152-5p                           | 1 |
| <i>circFANCL</i>  | miR-7156-3p                           | 1 |
| <i>circFANCL</i>  | miR-7160-5p                           | 1 |
| <i>circFANCL</i>  | miR-744-3p                            | 1 |
| <i>circFANCL</i>  | miR-762/4492/4498/5001-5p             | 1 |
| <i>circFANCL</i>  | miR-7641                              | 1 |
| <i>circFANCL</i>  | miR-7703                              | 1 |
| <i>circFANCL</i>  | miR-7852-3p                           | 1 |
| <i>circFANCL</i>  | miR-8056                              | 2 |
| <i>circFANCL</i>  | miR-8063                              | 1 |
| <i>circFANCL</i>  | miR-8077                              | 1 |
| <i>circFANCL</i>  | miR-8084                              | 1 |
| <i>circFANCL</i>  | miR-873-3p                            | 1 |
| <i>circFANCL</i>  | miR-875-5p                            | 1 |
| <i>circFANCL</i>  | miR-876-5p                            | 1 |
| <i>circFANCL</i>  | miR-885-3p                            | 1 |
| <i>circFANCL</i>  | miR-887-5p                            | 1 |
| <i>circFANCL</i>  | miR-888-5p                            | 1 |
| <i>circFANCL</i>  | miR-924                               | 1 |
| <i>circFANCL</i>  | miR-92a-1-5p                          | 1 |
| <i>circFANCL</i>  | miR-93-3p                             | 1 |
| <i>circFANCL</i>  | miR-935                               | 1 |
| <i>circFANCL</i>  | miR-939-3p                            | 1 |
| <i>circFANCL</i>  | miR-9500                              | 1 |
| <i>circFANCL</i>  | miR-96-5p/1271-5p                     | 1 |
| <i>circFANCL</i>  | miR-3653-3p                           | 1 |
| <i>circFBXL17</i> | let-7a-3p/let-7b-3p/let-7f-1-3p/98-3p | 3 |
| <i>circFBXL17</i> | let-7f-2-3p/1185-3p                   | 3 |
| <i>circFBXL17</i> | miR-100-3p                            | 1 |
| <i>circFBXL17</i> | miR-103b                              | 1 |
| <i>circFBXL17</i> | miR-1179                              | 2 |
| <i>circFBXL17</i> | miR-1199-5p/6751-3p                   | 1 |
| <i>circFBXL17</i> | miR-1200                              | 1 |
| <i>circFBXL17</i> | miR-1208                              | 1 |
| <i>circFBXL17</i> | miR-1231                              | 3 |
| <i>circFBXL17</i> | miR-124-3p.1                          | 1 |
| <i>circFBXL17</i> | miR-1243                              | 2 |

|                   |                    |   |
|-------------------|--------------------|---|
| <i>circFBXL17</i> | miR-1245b-3p       | 1 |
| <i>circFBXL17</i> | miR-1252-3p        | 1 |
| <i>circFBXL17</i> | miR-1261           | 1 |
| <i>circFBXL17</i> | miR-1273h-3p       | 1 |
| <i>circFBXL17</i> | miR-1285-5p        | 1 |
| <i>circFBXL17</i> | miR-1288-5p        | 1 |
| <i>circFBXL17</i> | miR-1289           | 1 |
| <i>circFBXL17</i> | miR-1298-5p        | 1 |
| <i>circFBXL17</i> | miR-135b-3p        | 1 |
| <i>circFBXL17</i> | miR-141-3p/200-3p  | 1 |
| <i>circFBXL17</i> | miR-146-5p         | 1 |
| <i>circFBXL17</i> | miR-1468-3p        | 1 |
| <i>circFBXL17</i> | miR-153-5p         | 1 |
| <i>circFBXL17</i> | miR-1537-3p        | 1 |
| <i>circFBXL17</i> | miR-154-3p/487-3p  | 1 |
| <i>circFBXL17</i> | miR-1587/3620-5p   | 1 |
| <i>circFBXL17</i> | miR-16-2-3p/195-3p | 1 |
| <i>circFBXL17</i> | miR-181-3p/4420    | 6 |
| <i>circFBXL17</i> | miR-1825           | 1 |
| <i>circFBXL17</i> | miR-19-3p          | 1 |
| <i>circFBXL17</i> | miR-199-5p         | 1 |
| <i>circFBXL17</i> | miR-200ab-5p       | 1 |
| <i>circFBXL17</i> | miR-203b-3p        | 2 |
| <i>circFBXL17</i> | miR-216a-5p        | 1 |
| <i>circFBXL17</i> | miR-216b-5p        | 1 |
| <i>circFBXL17</i> | miR-223-3p         | 1 |
| <i>circFBXL17</i> | miR-24-3p          | 1 |
| <i>circFBXL17</i> | miR-2467-3p        | 1 |
| <i>circFBXL17</i> | miR-27b-5p         | 1 |
| <i>circFBXL17</i> | miR-3064-5p        | 1 |
| <i>circFBXL17</i> | miR-3074-3p        | 1 |
| <i>circFBXL17</i> | miR-3120-5p        | 2 |
| <i>circFBXL17</i> | miR-3123           | 1 |
| <i>circFBXL17</i> | miR-3124-3p        | 1 |
| <i>circFBXL17</i> | miR-3134           | 1 |
| <i>circFBXL17</i> | miR-3145-3p        | 2 |
| <i>circFBXL17</i> | miR-3152-3p        | 1 |
| <i>circFBXL17</i> | miR-3156-5p        | 1 |



|                   |                           |   |
|-------------------|---------------------------|---|
| <i>circFBXL17</i> | miR-3158-3p               | 1 |
| <i>circFBXL17</i> | miR-3173-3p/6891-5p       | 1 |
| <i>circFBXL17</i> | miR-3180-5p               | 1 |
| <i>circFBXL17</i> | miR-3191-5p               | 1 |
| <i>circFBXL17</i> | miR-3201/4791             | 1 |
| <i>circFBXL17</i> | miR-320e                  | 1 |
| <i>circFBXL17</i> | miR-323b-5p/410-5p/494-5p | 1 |
| <i>circFBXL17</i> | miR-330-3p.2              | 1 |
| <i>circFBXL17</i> | miR-335-5p                | 1 |
| <i>circFBXL17</i> | miR-34b-3p                | 1 |
| <i>circFBXL17</i> | miR-34c-3p                | 1 |
| <i>circFBXL17</i> | miR-3613-3p               | 1 |
| <i>circFBXL17</i> | miR-3622b-5p              | 1 |
| <i>circFBXL17</i> | miR-3646                  | 1 |
| <i>circFBXL17</i> | miR-3653-3p               | 1 |
| <i>circFBXL17</i> | miR-3654                  | 2 |
| <i>circFBXL17</i> | miR-3662                  | 1 |
| <i>circFBXL17</i> | miR-3668                  | 1 |
| <i>circFBXL17</i> | miR-3675-3p               | 1 |
| <i>circFBXL17</i> | miR-3678-3p               | 1 |
| <i>circFBXL17</i> | miR-3688-3p               | 1 |
| <i>circFBXL17</i> | miR-371-5p                | 2 |
| <i>circFBXL17</i> | miR-3714                  | 1 |
| <i>circFBXL17</i> | miR-371b-5p/373-5p/616-5p | 2 |
| <i>circFBXL17</i> | miR-372-5p                | 2 |
| <i>circFBXL17</i> | miR-374c-3p               | 1 |
| <i>circFBXL17</i> | miR-376-3p                | 1 |
| <i>circFBXL17</i> | miR-376b-5p/376c-5p       | 1 |
| <i>circFBXL17</i> | miR-378a-5p               | 1 |
| <i>circFBXL17</i> | miR-378g                  | 1 |
| <i>circFBXL17</i> | miR-378j/6839-5p          | 2 |
| <i>circFBXL17</i> | miR-380-3p                | 1 |
| <i>circFBXL17</i> | miR-383-5p.1              | 1 |
| <i>circFBXL17</i> | miR-383-5p.2              | 1 |
| <i>circFBXL17</i> | miR-3910                  | 1 |
| <i>circFBXL17</i> | miR-3919                  | 1 |
| <i>circFBXL17</i> | miR-3924                  | 1 |
| <i>circFBXL17</i> | miR-3925-5p               | 1 |

|                   |                  |   |
|-------------------|------------------|---|
| <i>circFBXL17</i> | miR-3940-5p/4507 | 1 |
| <i>circFBXL17</i> | miR-3978         | 2 |
| <i>circFBXL17</i> | miR-4255         | 1 |
| <i>circFBXL17</i> | miR-4263         | 1 |
| <i>circFBXL17</i> | miR-4267         | 1 |
| <i>circFBXL17</i> | miR-4276         | 1 |
| <i>circFBXL17</i> | miR-4284         | 1 |
| <i>circFBXL17</i> | miR-4294         | 1 |
| <i>circFBXL17</i> | miR-4302         | 1 |
| <i>circFBXL17</i> | miR-432-5p       | 1 |
| <i>circFBXL17</i> | miR-4324         | 1 |
| <i>circFBXL17</i> | miR-4330         | 1 |
| <i>circFBXL17</i> | miR-4422         | 1 |
| <i>circFBXL17</i> | miR-4428         | 1 |
| <i>circFBXL17</i> | miR-4433b-3p     | 1 |
| <i>circFBXL17</i> | miR-4437         | 1 |
| <i>circFBXL17</i> | miR-4446-3p      | 1 |
| <i>circFBXL17</i> | miR-4453/4538    | 1 |
| <i>circFBXL17</i> | miR-4486         | 1 |
| <i>circFBXL17</i> | miR-4493         | 1 |
| <i>circFBXL17</i> | miR-4504         | 1 |
| <i>circFBXL17</i> | miR-4509         | 1 |
| <i>circFBXL17</i> | miR-451          | 1 |
| <i>circFBXL17</i> | miR-4517         | 1 |
| <i>circFBXL17</i> | miR-4520-2-3p    | 1 |
| <i>circFBXL17</i> | miR-4521         | 1 |
| <i>circFBXL17</i> | miR-4529-3p      | 1 |
| <i>circFBXL17</i> | miR-4534/8082    | 1 |
| <i>circFBXL17</i> | miR-4535         | 1 |
| <i>circFBXL17</i> | miR-4539         | 3 |
| <i>circFBXL17</i> | miR-454-5p       | 1 |
| <i>circFBXL17</i> | miR-4645-3p      | 1 |
| <i>circFBXL17</i> | miR-4656         | 1 |
| <i>circFBXL17</i> | miR-4662a-3p     | 1 |
| <i>circFBXL17</i> | miR-4665-3p      | 1 |
| <i>circFBXL17</i> | miR-4666a-5p     | 1 |
| <i>circFBXL17</i> | miR-4668-3p      | 1 |
| <i>circFBXL17</i> | miR-4674         | 1 |

|                   |                                      |   |
|-------------------|--------------------------------------|---|
| <i>circFBXL17</i> | miR-4675/4741                        | 1 |
| <i>circFBXL17</i> | miR-4680-5p                          | 1 |
| <i>circFBXL17</i> | miR-4687-3p                          | 1 |
| <i>circFBXL17</i> | miR-4695-3p                          | 1 |
| <i>circFBXL17</i> | miR-4697-3p                          | 1 |
| <i>circFBXL17</i> | miR-4698                             | 1 |
| <i>circFBXL17</i> | miR-4704-3p                          | 2 |
| <i>circFBXL17</i> | miR-4724-5p                          | 1 |
| <i>circFBXL17</i> | miR-4731-5p                          | 1 |
| <i>circFBXL17</i> | miR-4744                             | 1 |
| <i>circFBXL17</i> | miR-4756-3p                          | 1 |
| <i>circFBXL17</i> | miR-4766-5p                          | 1 |
| <i>circFBXL17</i> | miR-4772-5p                          | 1 |
| <i>circFBXL17</i> | miR-4776-5p                          | 1 |
| <i>circFBXL17</i> | miR-4789-5p                          | 3 |
| <i>circFBXL17</i> | miR-4799-5p                          | 1 |
| <i>circFBXL17</i> | miR-488-3p                           | 1 |
| <i>circFBXL17</i> | miR-492                              | 1 |
| <i>circFBXL17</i> | miR-5007-3p                          | 1 |
| <i>circFBXL17</i> | miR-5088-5p                          | 1 |
| <i>circFBXL17</i> | miR-5093                             | 1 |
| <i>circFBXL17</i> | miR-5094                             | 1 |
| <i>circFBXL17</i> | miR-5100                             | 1 |
| <i>circFBXL17</i> | miR-513c-5p/514b-5p                  | 1 |
| <i>circFBXL17</i> | miR-518a-5p/527                      | 1 |
| <i>circFBXL17</i> | miR-5190                             | 2 |
| <i>circFBXL17</i> | miR-524-5p                           | 1 |
| <i>circFBXL17</i> | miR-542-3p                           | 1 |
| <i>circFBXL17</i> | miR-544b                             | 1 |
| <i>circFBXL17</i> | miR-548aj-5p/548f-5p/548g-5p/548x-5p | 1 |
| <i>circFBXL17</i> | miR-548aw                            | 1 |
| <i>circFBXL17</i> | miR-548c-3p                          | 2 |
| <i>circFBXL17</i> | miR-548g-3p                          | 1 |
| <i>circFBXL17</i> | miR-5583-3p                          | 1 |
| <i>circFBXL17</i> | miR-5589-5p                          | 1 |
| <i>circFBXL17</i> | miR-5683                             | 1 |
| <i>circFBXL17</i> | miR-5694                             | 1 |
| <i>circFBXL17</i> | miR-5696                             | 1 |

|                   |                                      |   |
|-------------------|--------------------------------------|---|
| <i>circFBXL17</i> | miR-5700                             | 1 |
| <i>circFBXL17</i> | miR-5702                             | 1 |
| <i>circFBXL17</i> | miR-576-5p                           | 1 |
| <i>circFBXL17</i> | miR-579-3p                           | 1 |
| <i>circFBXL17</i> | miR-589-5p                           | 1 |
| <i>circFBXL17</i> | miR-598-3p                           | 1 |
| <i>circFBXL17</i> | miR-600                              | 1 |
| <i>circFBXL17</i> | miR-605-3p                           | 1 |
| <i>circFBXL17</i> | miR-6074                             | 1 |
| <i>circFBXL17</i> | miR-6076/6797-3p                     | 1 |
| <i>circFBXL17</i> | miR-612/1285-3p/3187-5p/5189-5p/6860 | 1 |
| <i>circFBXL17</i> | miR-6126                             | 3 |
| <i>circFBXL17</i> | miR-6134                             | 1 |
| <i>circFBXL17</i> | miR-616-3p                           | 1 |
| <i>circFBXL17</i> | miR-626/6876-3p                      | 1 |
| <i>circFBXL17</i> | miR-628-5p                           | 1 |
| <i>circFBXL17</i> | miR-632/4288                         | 3 |
| <i>circFBXL17</i> | miR-6504-3p                          | 1 |
| <i>circFBXL17</i> | miR-653-3p                           | 6 |
| <i>circFBXL17</i> | miR-653-5p                           | 1 |
| <i>circFBXL17</i> | miR-659-5p                           | 1 |
| <i>circFBXL17</i> | miR-664a-3p                          | 1 |
| <i>circFBXL17</i> | miR-668-3p                           | 3 |
| <i>circFBXL17</i> | miR-6720-5p                          | 1 |
| <i>circFBXL17</i> | miR-6733-3p                          | 1 |
| <i>circFBXL17</i> | miR-6739-3p                          | 1 |
| <i>circFBXL17</i> | miR-6750-3p                          | 3 |
| <i>circFBXL17</i> | miR-6757-3p                          | 1 |
| <i>circFBXL17</i> | miR-676-3p                           | 3 |
| <i>circFBXL17</i> | miR-6760-3p                          | 1 |
| <i>circFBXL17</i> | miR-6761-3p                          | 1 |
| <i>circFBXL17</i> | miR-6782-3p                          | 1 |
| <i>circFBXL17</i> | miR-6806-5p                          | 1 |
| <i>circFBXL17</i> | miR-6815-3p                          | 1 |
| <i>circFBXL17</i> | miR-6817-3p                          | 1 |
| <i>circFBXL17</i> | miR-6829-5p                          | 1 |
| <i>circFBXL17</i> | miR-6839-3p                          | 1 |
| <i>circFBXL17</i> | miR-6861-3p                          | 1 |

|                   |                                      |   |
|-------------------|--------------------------------------|---|
| <i>circFBXL17</i> | miR-6864-5p                          | 3 |
| <i>circFBXL17</i> | miR-6873-3p                          | 1 |
| <i>circFBXL17</i> | miR-6885-3p                          | 1 |
| <i>circFBXL17</i> | miR-6888-3p                          | 1 |
| <i>circFBXL17</i> | miR-6892-5p                          | 1 |
| <i>circFBXL17</i> | miR-7110-3p                          | 1 |
| <i>circFBXL17</i> | miR-7158-3p                          | 2 |
| <i>circFBXL17</i> | miR-7158-5p                          | 1 |
| <i>circFBXL17</i> | miR-7161-3p                          | 1 |
| <i>circFBXL17</i> | miR-762/4492/4498/5001-5p            | 1 |
| <i>circFBXL17</i> | miR-7705                             | 1 |
| <i>circFBXL17</i> | miR-7852-3p                          | 1 |
| <i>circFBXL17</i> | miR-7854-3p                          | 1 |
| <i>circFBXL17</i> | miR-7974                             | 1 |
| <i>circFBXL17</i> | miR-8063                             | 1 |
| <i>circFBXL17</i> | miR-875-3p                           | 1 |
| <i>circFBXL17</i> | miR-888-5p                           | 3 |
| <i>circFBXL17</i> | miR-1197                             | 1 |
| <i>circFBXL17</i> | miR-1207-3p                          | 2 |
| <i>circFBXL17</i> | miR-1229-3p                          | 1 |
| <i>circFBXL17</i> | miR-1252-5p                          | 2 |
| <i>circFBXL17</i> | miR-1255a/1255b-5p                   | 1 |
| <i>circFBXL17</i> | miR-125a-3p                          | 2 |
| <i>circFBXL17</i> | miR-126-5p                           | 1 |
| <i>circFBXL17</i> | miR-1269                             | 2 |
| <i>circFBXL17</i> | miR-1277-5p                          | 2 |
| <i>circFBXL17</i> | miR-1278                             | 1 |
| <i>circFBXL17</i> | miR-1286                             | 1 |
| <i>circFBXL17</i> | miR-1287-5p                          | 1 |
| <i>circFBXL17</i> | miR-130-3p/301-3p/454-3p             | 1 |
| <i>circFBXL17</i> | miR-1304-3p                          | 3 |
| <i>circFBXL17</i> | miR-1343-3p                          | 2 |
| <i>circFBXL17</i> | miR-137                              | 1 |
| <i>circFBXL17</i> | miR-139-5p                           | 2 |
| <i>circFBXL17</i> | miR-145-5p                           | 1 |
| <i>circFBXL17</i> | miR-15-5p/16-5p/195-5p/424-5p/497-5p | 2 |
| <i>circFBXL17</i> | miR-151-3p                           | 1 |
| <i>circFBXL17</i> | miR-16-1-3p                          | 2 |

|                   |                                     |   |
|-------------------|-------------------------------------|---|
| <i>circFBXL17</i> | miR-17-5p/20-5p/93-5p/106-5p/519-3p | 1 |
| <i>circFBXL17</i> | miR-183-3p                          | 2 |
| <i>circFBXL17</i> | miR-19-5p                           | 1 |
| <i>circFBXL17</i> | miR-192-5p/215-5p                   | 1 |
| <i>circFBXL17</i> | miR-193-3p                          | 1 |
| <i>circFBXL17</i> | miR-196a-3p                         | 1 |
| <i>circFBXL17</i> | miR-2052                            | 1 |
| <i>circFBXL17</i> | miR-208-5p                          | 2 |
| <i>circFBXL17</i> | miR-219-5p                          | 2 |
| <i>circFBXL17</i> | miR-219a-2-3p                       | 2 |
| <i>circFBXL17</i> | miR-219b-3p                         | 2 |
| <i>circFBXL17</i> | miR-224-5p                          | 2 |
| <i>circFBXL17</i> | miR-2392                            | 1 |
| <i>circFBXL17</i> | miR-25-3p/32-5p/92-3p/363-3p/367-3p | 2 |
| <i>circFBXL17</i> | miR-2682-3p/6781-3p                 | 1 |
| <i>circFBXL17</i> | miR-29b-2-5p                        | 1 |
| <i>circFBXL17</i> | miR-30-5p                           | 2 |
| <i>circFBXL17</i> | miR-302-3p/372-3p/373-3p/520-3p     | 1 |
| <i>circFBXL17</i> | miR-302f                            | 2 |
| <i>circFBXL17</i> | miR-3121-5p                         | 1 |
| <i>circFBXL17</i> | miR-3135b                           | 1 |
| <i>circFBXL17</i> | miR-3148                            | 3 |
| <i>circFBXL17</i> | miR-3152-5p                         | 2 |
| <i>circFBXL17</i> | miR-3160-5p                         | 2 |
| <i>circFBXL17</i> | miR-3161                            | 2 |
| <i>circFBXL17</i> | miR-3169                            | 2 |
| <i>circFBXL17</i> | miR-3183/4723-3p/6769b-3p           | 1 |
| <i>circFBXL17</i> | miR-3192-3p                         | 4 |
| <i>circFBXL17</i> | miR-32-3p                           | 1 |
| <i>circFBXL17</i> | miR-331-5p                          | 2 |
| <i>circFBXL17</i> | miR-3607-3p                         | 2 |
| <i>circFBXL17</i> | miR-3660/4526                       | 2 |
| <i>circFBXL17</i> | miR-3680-3p                         | 1 |
| <i>circFBXL17</i> | miR-3680-5p                         | 2 |
| <i>circFBXL17</i> | miR-3682-5p                         | 1 |
| <i>circFBXL17</i> | miR-3690                            | 2 |
| <i>circFBXL17</i> | miR-374-5p                          | 2 |
| <i>circFBXL17</i> | miR-374b-3p                         | 2 |

|                   |                  |   |
|-------------------|------------------|---|
| <i>circFBXL17</i> | miR-375          | 1 |
| <i>circFBXL17</i> | miR-378-3p       | 2 |
| <i>circFBXL17</i> | miR-382-3p       | 1 |
| <i>circFBXL17</i> | miR-3920         | 2 |
| <i>circFBXL17</i> | miR-3934-5p      | 2 |
| <i>circFBXL17</i> | miR-3942-3p      | 1 |
| <i>circFBXL17</i> | miR-410-3p       | 2 |
| <i>circFBXL17</i> | miR-411-3p       | 4 |
| <i>circFBXL17</i> | miR-421          | 2 |
| <i>circFBXL17</i> | miR-425-5p       | 2 |
| <i>circFBXL17</i> | miR-4254         | 2 |
| <i>circFBXL17</i> | miR-4256         | 2 |
| <i>circFBXL17</i> | miR-4282         | 2 |
| <i>circFBXL17</i> | miR-432-3p       | 1 |
| <i>circFBXL17</i> | miR-4328         | 1 |
| <i>circFBXL17</i> | miR-4423-3p      | 1 |
| <i>circFBXL17</i> | miR-4423-5p      | 2 |
| <i>circFBXL17</i> | miR-4445-5p      | 2 |
| <i>circFBXL17</i> | miR-4452         | 2 |
| <i>circFBXL17</i> | miR-4496         | 1 |
| <i>circFBXL17</i> | miR-4502         | 4 |
| <i>circFBXL17</i> | miR-450b-5p      | 1 |
| <i>circFBXL17</i> | miR-4638-3p      | 2 |
| <i>circFBXL17</i> | miR-4660         | 2 |
| <i>circFBXL17</i> | miR-4666b        | 1 |
| <i>circFBXL17</i> | miR-4678         | 2 |
| <i>circFBXL17</i> | miR-4711-5p      | 3 |
| <i>circFBXL17</i> | miR-4722-5p      | 1 |
| <i>circFBXL17</i> | miR-4729         | 2 |
| <i>circFBXL17</i> | miR-4759         | 2 |
| <i>circFBXL17</i> | miR-4762-3p      | 4 |
| <i>circFBXL17</i> | miR-4774-3p      | 2 |
| <i>circFBXL17</i> | miR-4778-3p      | 2 |
| <i>circFBXL17</i> | miR-4795-3p      | 1 |
| <i>circFBXL17</i> | miR-4798-3p      | 2 |
| <i>circFBXL17</i> | miR-495-3p       | 1 |
| <i>circFBXL17</i> | miR-5000-3p      | 1 |
| <i>circFBXL17</i> | miR-5009-5p/8058 | 2 |

|                   |                   |   |
|-------------------|-------------------|---|
| <i>circFBXL17</i> | miR-5011-3p       | 1 |
| <i>circFBXL17</i> | miR-503-5p        | 2 |
| <i>circFBXL17</i> | miR-505-3p.2      | 2 |
| <i>circFBXL17</i> | miR-507/557       | 1 |
| <i>circFBXL17</i> | miR-508-3p        | 2 |
| <i>circFBXL17</i> | miR-5087          | 1 |
| <i>circFBXL17</i> | miR-5095/7151-3p  | 2 |
| <i>circFBXL17</i> | miR-510-3p        | 2 |
| <i>circFBXL17</i> | miR-511-3p        | 2 |
| <i>circFBXL17</i> | miR-513b-3p       | 2 |
| <i>circFBXL17</i> | miR-519-3p        | 1 |
| <i>circFBXL17</i> | miR-5197-5p       | 2 |
| <i>circFBXL17</i> | miR-543           | 2 |
| <i>circFBXL17</i> | miR-545-3p        | 2 |
| <i>circFBXL17</i> | miR-548ah-5p/3609 | 1 |
| <i>circFBXL17</i> | miR-551b-5p       | 2 |
| <i>circFBXL17</i> | miR-552-3p        | 2 |
| <i>circFBXL17</i> | miR-556-5p        | 1 |
| <i>circFBXL17</i> | miR-567           | 4 |
| <i>circFBXL17</i> | miR-5697          | 1 |
| <i>circFBXL17</i> | miR-570-3p        | 1 |
| <i>circFBXL17</i> | miR-5708          | 1 |
| <i>circFBXL17</i> | miR-6079          | 1 |
| <i>circFBXL17</i> | miR-6124          | 3 |
| <i>circFBXL17</i> | miR-617           | 3 |
| <i>circFBXL17</i> | miR-646           | 2 |
| <i>circFBXL17</i> | miR-6501-5p       | 2 |
| <i>circFBXL17</i> | miR-6505-3p       | 3 |
| <i>circFBXL17</i> | miR-6509-5p       | 2 |
| <i>circFBXL17</i> | miR-6511-5p       | 1 |
| <i>circFBXL17</i> | miR-652-3p        | 2 |
| <i>circFBXL17</i> | miR-654-3p        | 2 |
| <i>circFBXL17</i> | miR-656-5p        | 1 |
| <i>circFBXL17</i> | miR-659-3p        | 1 |
| <i>circFBXL17</i> | miR-671-5p        | 1 |
| <i>circFBXL17</i> | miR-6719-3p       | 2 |
| <i>circFBXL17</i> | miR-6730-3p       | 2 |
| <i>circFBXL17</i> | miR-6744-5p       | 1 |



|                   |                    |   |
|-------------------|--------------------|---|
| <i>circFBXL17</i> | miR-6753-5p        | 1 |
| <i>circFBXL17</i> | miR-6759-3p        | 1 |
| <i>circFBXL17</i> | miR-6800-3p        | 2 |
| <i>circFBXL17</i> | miR-6816-3p        | 2 |
| <i>circFBXL17</i> | miR-6828-5p        | 1 |
| <i>circFBXL17</i> | miR-6834-3p        | 2 |
| <i>circFBXL17</i> | miR-6836-3p        | 1 |
| <i>circFBXL17</i> | miR-6856-3p        | 2 |
| <i>circFBXL17</i> | miR-7112-3p        | 3 |
| <i>circFBXL17</i> | miR-7159-5p        | 2 |
| <i>circFBXL17</i> | miR-718            | 1 |
| <i>circFBXL17</i> | miR-7702           | 1 |
| <i>circFBXL17</i> | miR-7850-5p        | 1 |
| <i>circFBXL17</i> | miR-7973           | 1 |
| <i>circFBXL17</i> | miR-8080           | 2 |
| <i>circFBXL17</i> | miR-8083           | 2 |
| <i>circFBXL17</i> | miR-873-5p.1       | 1 |
| <i>circFBXL17</i> | miR-873-5p.2       | 1 |
| <i>circFBXL17</i> | miR-935            | 1 |
| <i>circFBXO7</i>  | miR-1-3p/206       | 5 |
| <i>circFBXO7</i>  | miR-1-5p           | 2 |
| <i>circFBXO7</i>  | miR-1178-3p        | 3 |
| <i>circFBXO7</i>  | miR-1206           | 3 |
| <i>circFBXO7</i>  | miR-122-5p         | 3 |
| <i>circFBXO7</i>  | miR-1226-3p        | 2 |
| <i>circFBXO7</i>  | miR-1226-5p        | 4 |
| <i>circFBXO7</i>  | miR-1236-3p        | 2 |
| <i>circFBXO7</i>  | miR-1236-5p        | 3 |
| <i>circFBXO7</i>  | miR-1255a/1255b-5p | 2 |
| <i>circFBXO7</i>  | miR-126-5p         | 3 |
| <i>circFBXO7</i>  | miR-127-5p         | 2 |
| <i>circFBXO7</i>  | miR-1276           | 3 |
| <i>circFBXO7</i>  | miR-1287-5p        | 2 |
| <i>circFBXO7</i>  | miR-1294           | 2 |
| <i>circFBXO7</i>  | miR-1298-5p        | 2 |
| <i>circFBXO7</i>  | miR-1299           | 3 |
| <i>circFBXO7</i>  | miR-133a-5p        | 3 |
| <i>circFBXO7</i>  | miR-138-5p         | 3 |

|                  |                           |   |
|------------------|---------------------------|---|
| <i>circFBXO7</i> | miR-145-5p                | 2 |
| <i>circFBXO7</i> | miR-154-3p/487-3p         | 1 |
| <i>circFBXO7</i> | miR-1587/3620-5p          | 2 |
| <i>circFBXO7</i> | miR-15b-3p                | 6 |
| <i>circFBXO7</i> | miR-1825                  | 2 |
| <i>circFBXO7</i> | miR-199-5p                | 2 |
| <i>circFBXO7</i> | miR-2054                  | 2 |
| <i>circFBXO7</i> | miR-20a-3p                | 3 |
| <i>circFBXO7</i> | miR-21-3p/3591-3p         | 2 |
| <i>circFBXO7</i> | miR-2114-5p               | 2 |
| <i>circFBXO7</i> | miR-212-5p                | 2 |
| <i>circFBXO7</i> | miR-214-5p                | 2 |
| <i>circFBXO7</i> | miR-2355-5p               | 2 |
| <i>circFBXO7</i> | miR-2392                  | 2 |
| <i>circFBXO7</i> | miR-26-5p                 | 2 |
| <i>circFBXO7</i> | miR-296-3p                | 4 |
| <i>circFBXO7</i> | miR-301a-5p/301b-5p       | 3 |
| <i>circFBXO7</i> | miR-3074-3p               | 2 |
| <i>circFBXO7</i> | miR-3135b                 | 2 |
| <i>circFBXO7</i> | miR-3146                  | 3 |
| <i>circFBXO7</i> | miR-3160-3p               | 4 |
| <i>circFBXO7</i> | miR-3174                  | 2 |
| <i>circFBXO7</i> | miR-3185                  | 5 |
| <i>circFBXO7</i> | miR-3187-3p               | 3 |
| <i>circFBXO7</i> | miR-3189-3p               | 2 |
| <i>circFBXO7</i> | miR-3192-3p               | 3 |
| <i>circFBXO7</i> | miR-3193                  | 3 |
| <i>circFBXO7</i> | miR-3194-3p               | 3 |
| <i>circFBXO7</i> | miR-3198/4309             | 3 |
| <i>circFBXO7</i> | miR-323b-5p/410-5p/494-5p | 3 |
| <i>circFBXO7</i> | miR-34b-3p                | 3 |
| <i>circFBXO7</i> | miR-34c-3p                | 3 |
| <i>circFBXO7</i> | miR-3607-3p               | 1 |
| <i>circFBXO7</i> | miR-3610                  | 1 |
| <i>circFBXO7</i> | miR-3614-5p               | 4 |
| <i>circFBXO7</i> | miR-362-5p/500b-5p        | 2 |
| <i>circFBXO7</i> | miR-3620-3p               | 3 |
| <i>circFBXO7</i> | miR-3674                  | 2 |

|                  |                     |   |
|------------------|---------------------|---|
| <i>circFBXO7</i> | miR-3691-5p         | 2 |
| <i>circFBXO7</i> | miR-378g            | 2 |
| <i>circFBXO7</i> | miR-3920            | 4 |
| <i>circFBXO7</i> | miR-3921/4653-5p    | 3 |
| <i>circFBXO7</i> | miR-3925-3p         | 2 |
| <i>circFBXO7</i> | miR-3926            | 3 |
| <i>circFBXO7</i> | miR-3974            | 3 |
| <i>circFBXO7</i> | miR-423-5p          | 2 |
| <i>circFBXO7</i> | miR-4299            | 3 |
| <i>circFBXO7</i> | miR-4311            | 3 |
| <i>circFBXO7</i> | miR-4316            | 2 |
| <i>circFBXO7</i> | miR-432-3p          | 2 |
| <i>circFBXO7</i> | miR-432-5p          | 2 |
| <i>circFBXO7</i> | miR-4421/5699-3p    | 2 |
| <i>circFBXO7</i> | miR-4427            | 3 |
| <i>circFBXO7</i> | miR-4435            | 3 |
| <i>circFBXO7</i> | miR-4450            | 2 |
| <i>circFBXO7</i> | miR-4456            | 3 |
| <i>circFBXO7</i> | miR-4463            | 2 |
| <i>circFBXO7</i> | miR-4474-5p         | 3 |
| <i>circFBXO7</i> | miR-4480            | 2 |
| <i>circFBXO7</i> | miR-4486            | 2 |
| <i>circFBXO7</i> | miR-4487            | 4 |
| <i>circFBXO7</i> | miR-4494            | 2 |
| <i>circFBXO7</i> | miR-4495            | 3 |
| <i>circFBXO7</i> | miR-4499            | 2 |
| <i>circFBXO7</i> | miR-449c-3p         | 3 |
| <i>circFBXO7</i> | miR-452-3p          | 4 |
| <i>circFBXO7</i> | miR-4528            | 5 |
| <i>circFBXO7</i> | miR-4633-3p/6500-5p | 4 |
| <i>circFBXO7</i> | miR-4635            | 4 |
| <i>circFBXO7</i> | miR-4656            | 2 |
| <i>circFBXO7</i> | miR-4666b           | 4 |
| <i>circFBXO7</i> | miR-4674            | 2 |
| <i>circFBXO7</i> | miR-4675/4741       | 2 |
| <i>circFBXO7</i> | miR-4678            | 3 |
| <i>circFBXO7</i> | miR-4680-3p         | 3 |
| <i>circFBXO7</i> | miR-4693-5p         | 2 |

|                  |                              |   |
|------------------|------------------------------|---|
| <i>circFBX07</i> | miR-4709-3p                  | 5 |
| <i>circFBX07</i> | miR-4713-3p                  | 2 |
| <i>circFBX07</i> | miR-4733-3p                  | 2 |
| <i>circFBX07</i> | miR-4733-5p                  | 2 |
| <i>circFBX07</i> | miR-4752                     | 2 |
| <i>circFBX07</i> | miR-4753-3p                  | 2 |
| <i>circFBX07</i> | miR-4761-5p                  | 3 |
| <i>circFBX07</i> | miR-4765                     | 3 |
| <i>circFBX07</i> | miR-4778-5p                  | 3 |
| <i>circFBX07</i> | miR-4782-5p/5706             | 3 |
| <i>circFBX07</i> | miR-4786-3p                  | 2 |
| <i>circFBX07</i> | miR-4793-5p                  | 3 |
| <i>circFBX07</i> | miR-4803                     | 4 |
| <i>circFBX07</i> | miR-493-3p                   | 2 |
| <i>circFBX07</i> | miR-494-3p                   | 2 |
| <i>circFBX07</i> | miR-496.2                    | 1 |
| <i>circFBX07</i> | miR-499b-5p                  | 2 |
| <i>circFBX07</i> | miR-5000-5p                  | 2 |
| <i>circFBX07</i> | miR-501-5p                   | 2 |
| <i>circFBX07</i> | miR-5011-3p                  | 4 |
| <i>circFBX07</i> | miR-502-5p                   | 4 |
| <i>circFBX07</i> | miR-503-3p                   | 1 |
| <i>circFBX07</i> | miR-509-3p                   | 3 |
| <i>circFBX07</i> | miR-513b-3p                  | 2 |
| <i>circFBX07</i> | miR-515-5p/519e-5p           | 2 |
| <i>circFBX07</i> | miR-516b-5p                  | 3 |
| <i>circFBX07</i> | miR-5187-3p                  | 3 |
| <i>circFBX07</i> | miR-5190                     | 2 |
| <i>circFBX07</i> | miR-5194                     | 2 |
| <i>circFBX07</i> | miR-5196-3p                  | 3 |
| <i>circFBX07</i> | miR-526b-5p                  | 4 |
| <i>circFBX07</i> | miR-539-3p                   | 1 |
| <i>circFBX07</i> | miR-548ai/548ag/548ba/570-5p | 2 |
| <i>circFBX07</i> | miR-548q                     | 3 |
| <i>circFBX07</i> | miR-548s                     | 3 |
| <i>circFBX07</i> | miR-554                      | 3 |
| <i>circFBX07</i> | miR-558                      | 4 |
| <i>circFBX07</i> | miR-5580-3p                  | 2 |

|                  |                                      |   |
|------------------|--------------------------------------|---|
| <i>circFBX07</i> | miR-5588-3p                          | 2 |
| <i>circFBX07</i> | miR-5681b                            | 1 |
| <i>circFBX07</i> | miR-5691                             | 3 |
| <i>circFBX07</i> | miR-583                              | 3 |
| <i>circFBX07</i> | miR-588                              | 3 |
| <i>circFBX07</i> | miR-593-3p                           | 3 |
| <i>circFBX07</i> | miR-604                              | 2 |
| <i>circFBX07</i> | miR-612/1285-3p/3187-5p/5189-5p/6860 | 2 |
| <i>circFBX07</i> | miR-6126                             | 2 |
| <i>circFBX07</i> | miR-6128                             | 2 |
| <i>circFBX07</i> | miR-6131                             | 3 |
| <i>circFBX07</i> | miR-616-3p                           | 2 |
| <i>circFBX07</i> | miR-638                              | 2 |
| <i>circFBX07</i> | miR-643                              | 2 |
| <i>circFBX07</i> | miR-6500-3p                          | 4 |
| <i>circFBX07</i> | miR-6505-5p                          | 4 |
| <i>circFBX07</i> | miR-6507-5p                          | 5 |
| <i>circFBX07</i> | miR-6514-3p                          | 2 |
| <i>circFBX07</i> | miR-6515-3p                          | 2 |
| <i>circFBX07</i> | miR-656-3p                           | 2 |
| <i>circFBX07</i> | miR-656-5p                           | 3 |
| <i>circFBX07</i> | miR-659-3p                           | 3 |
| <i>circFBX07</i> | miR-663b                             | 3 |
| <i>circFBX07</i> | miR-6715b-3p                         | 2 |
| <i>circFBX07</i> | miR-6734-5p                          | 4 |
| <i>circFBX07</i> | miR-6739-3p                          | 3 |
| <i>circFBX07</i> | miR-6744-5p                          | 2 |
| <i>circFBX07</i> | miR-6748-3p                          | 2 |
| <i>circFBX07</i> | miR-6758-3p                          | 3 |
| <i>circFBX07</i> | miR-676-3p                           | 2 |
| <i>circFBX07</i> | miR-676-5p                           | 2 |
| <i>circFBX07</i> | miR-6762-3p                          | 2 |
| <i>circFBX07</i> | miR-6783-5p                          | 2 |
| <i>circFBX07</i> | miR-6804-5p                          | 4 |
| <i>circFBX07</i> | miR-6811-3p                          | 2 |
| <i>circFBX07</i> | miR-6829-5p                          | 2 |
| <i>circFBX07</i> | miR-6833-5p                          | 2 |
| <i>circFBX07</i> | miR-6834-5p                          | 4 |

|                  |                                       |   |
|------------------|---------------------------------------|---|
| <i>circFBXO7</i> | miR-6847-3p                           | 3 |
| <i>circFBXO7</i> | miR-6853-3p                           | 3 |
| <i>circFBXO7</i> | miR-6864-5p                           | 2 |
| <i>circFBXO7</i> | miR-6873-5p                           | 4 |
| <i>circFBXO7</i> | miR-6874-5p                           | 3 |
| <i>circFBXO7</i> | miR-6882-3p                           | 3 |
| <i>circFBXO7</i> | miR-6894-3p                           | 2 |
| <i>circFBXO7</i> | miR-6895-3p                           | 3 |
| <i>circFBXO7</i> | miR-7114-5p                           | 2 |
| <i>circFBXO7</i> | miR-762/4492/4498/5001-5p             | 2 |
| <i>circFBXO7</i> | miR-766-3p                            | 2 |
| <i>circFBXO7</i> | miR-7702                              | 1 |
| <i>circFBXO7</i> | miR-7843-3p                           | 2 |
| <i>circFBXO7</i> | miR-7978                              | 3 |
| <i>circFBXO7</i> | miR-8056                              | 2 |
| <i>circFBXO7</i> | miR-8086                              | 3 |
| <i>circFBXO7</i> | miR-890                               | 3 |
| <i>circFBXO7</i> | let-7-5p/98-5p                        | 1 |
| <i>circFBXO7</i> | let-7a-3p/let-7b-3p/let-7f-1-3p/98-3p | 1 |
| <i>circFBXO7</i> | let-7f-2-3p/1185-3p                   | 1 |
| <i>circFBXO7</i> | let-7i-3p                             | 2 |
| <i>circFBXO7</i> | miR-1184                              | 1 |
| <i>circFBXO7</i> | miR-1185-5p                           | 1 |
| <i>circFBXO7</i> | miR-1205                              | 1 |
| <i>circFBXO7</i> | miR-1207-3p                           | 1 |
| <i>circFBXO7</i> | miR-124-3p.1                          | 2 |
| <i>circFBXO7</i> | miR-125-5p                            | 1 |
| <i>circFBXO7</i> | miR-1250-5p                           | 1 |
| <i>circFBXO7</i> | miR-1251-3p                           | 1 |
| <i>circFBXO7</i> | miR-1253                              | 1 |
| <i>circFBXO7</i> | miR-125a-3p                           | 1 |
| <i>circFBXO7</i> | miR-1265                              | 1 |
| <i>circFBXO7</i> | miR-1291/6775-3p                      | 2 |
| <i>circFBXO7</i> | miR-1295a                             | 2 |
| <i>circFBXO7</i> | miR-1301-3p                           | 1 |
| <i>circFBXO7</i> | miR-1303                              | 1 |
| <i>circFBXO7</i> | miR-132-3p/212-3p                     | 1 |
| <i>circFBXO7</i> | miR-139-5p                            | 1 |

|                  |                       |   |
|------------------|-----------------------|---|
| <i>circFBXO7</i> | miR-141-3p/200-3p     | 1 |
| <i>circFBXO7</i> | miR-146b-3p           | 1 |
| <i>circFBXO7</i> | miR-148-3p/152-3p     | 1 |
| <i>circFBXO7</i> | miR-152-5p            | 2 |
| <i>circFBXO7</i> | miR-153-5p            | 1 |
| <i>circFBXO7</i> | miR-17-3p             | 1 |
| <i>circFBXO7</i> | miR-181d-3p           | 1 |
| <i>circFBXO7</i> | miR-182-5p            | 1 |
| <i>circFBXO7</i> | miR-183-3p            | 2 |
| <i>circFBXO7</i> | miR-183-5p.2          | 1 |
| <i>circFBXO7</i> | miR-186-3p            | 2 |
| <i>circFBXO7</i> | miR-18a-3p            | 1 |
| <i>circFBXO7</i> | miR-18b-3p            | 2 |
| <i>circFBXO7</i> | miR-1914-5p           | 2 |
| <i>circFBXO7</i> | miR-21-5p/590-5p      | 1 |
| <i>circFBXO7</i> | miR-2115-3p           | 1 |
| <i>circFBXO7</i> | miR-217               | 1 |
| <i>circFBXO7</i> | miR-219a-2-3p         | 2 |
| <i>circFBXO7</i> | miR-219b-3p           | 2 |
| <i>circFBXO7</i> | miR-22-3p             | 1 |
| <i>circFBXO7</i> | miR-2276-5p           | 2 |
| <i>circFBXO7</i> | miR-2278              | 1 |
| <i>circFBXO7</i> | miR-2467-3p           | 1 |
| <i>circFBXO7</i> | miR-299-3p            | 1 |
| <i>circFBXO7</i> | miR-302c-3p.2/520-3p  | 1 |
| <i>circFBXO7</i> | miR-3065-5p           | 1 |
| <i>circFBXO7</i> | miR-3125/3916/6859-5p | 1 |
| <i>circFBXO7</i> | miR-3126-5p           | 2 |
| <i>circFBXO7</i> | miR-3143              | 2 |
| <i>circFBXO7</i> | miR-3145-5p           | 1 |
| <i>circFBXO7</i> | miR-3157-3p           | 5 |
| <i>circFBXO7</i> | miR-3158-5p           | 1 |
| <i>circFBXO7</i> | miR-3171              | 1 |
| <i>circFBXO7</i> | miR-3173-5p           | 1 |
| <i>circFBXO7</i> | miR-324-3p/1913       | 1 |
| <i>circFBXO7</i> | miR-3529-3p           | 1 |
| <i>circFBXO7</i> | miR-3605-5p           | 1 |
| <i>circFBXO7</i> | miR-3622a-5p          | 1 |

|                  |                                    |   |
|------------------|------------------------------------|---|
| <i>circFBXO7</i> | miR-3622b-5p                       | 1 |
| <i>circFBXO7</i> | miR-3667-3p                        | 1 |
| <i>circFBXO7</i> | miR-3688-5p                        | 1 |
| <i>circFBXO7</i> | miR-3692-3p                        | 2 |
| <i>circFBXO7</i> | miR-3714                           | 2 |
| <i>circFBXO7</i> | miR-381-3p                         | 1 |
| <i>circFBXO7</i> | miR-382-3p                         | 2 |
| <i>circFBXO7</i> | miR-3910                           | 2 |
| <i>circFBXO7</i> | miR-3919                           | 1 |
| <i>circFBXO7</i> | miR-3922-5p                        | 1 |
| <i>circFBXO7</i> | miR-3924                           | 1 |
| <i>circFBXO7</i> | miR-3934-5p                        | 1 |
| <i>circFBXO7</i> | miR-3940-5p/4507                   | 1 |
| <i>circFBXO7</i> | miR-411-3p                         | 1 |
| <i>circFBXO7</i> | miR-421                            | 1 |
| <i>circFBXO7</i> | miR-4282                           | 2 |
| <i>circFBXO7</i> | miR-4290                           | 3 |
| <i>circFBXO7</i> | miR-4303                           | 2 |
| <i>circFBXO7</i> | miR-4304                           | 1 |
| <i>circFBXO7</i> | miR-4321                           | 1 |
| <i>circFBXO7</i> | miR-4324                           | 1 |
| <i>circFBXO7</i> | miR-4419a/4510/6127/6129/6130/6133 | 2 |
| <i>circFBXO7</i> | miR-4426/4647/4662b                | 1 |
| <i>circFBXO7</i> | miR-4436b-5p                       | 1 |
| <i>circFBXO7</i> | miR-4446-5p                        | 1 |
| <i>circFBXO7</i> | miR-4452                           | 2 |
| <i>circFBXO7</i> | miR-4464/4748                      | 1 |
| <i>circFBXO7</i> | miR-4474-3p                        | 1 |
| <i>circFBXO7</i> | miR-4484                           | 1 |
| <i>circFBXO7</i> | miR-4491/4657                      | 1 |
| <i>circFBXO7</i> | miR-4520-3p                        | 1 |
| <i>circFBXO7</i> | miR-454-5p                         | 2 |
| <i>circFBXO7</i> | miR-4642                           | 1 |
| <i>circFBXO7</i> | miR-4645-3p                        | 1 |
| <i>circFBXO7</i> | miR-4649-3p                        | 3 |
| <i>circFBXO7</i> | miR-4655-3p                        | 1 |
| <i>circFBXO7</i> | miR-4659a-5p/4659b-5p              | 2 |
| <i>circFBXO7</i> | miR-4660                           | 1 |



|                  |                             |   |
|------------------|-----------------------------|---|
| <i>circFBXO7</i> | miR-4666a-3p                | 1 |
| <i>circFBXO7</i> | miR-4684-5p                 | 1 |
| <i>circFBXO7</i> | miR-4693-3p                 | 1 |
| <i>circFBXO7</i> | miR-4698                    | 2 |
| <i>circFBXO7</i> | miR-4699-3p                 | 1 |
| <i>circFBXO7</i> | miR-4699-5p                 | 1 |
| <i>circFBXO7</i> | miR-4704-3p                 | 1 |
| <i>circFBXO7</i> | miR-4704-5p                 | 1 |
| <i>circFBXO7</i> | miR-4705                    | 1 |
| <i>circFBXO7</i> | miR-4710                    | 1 |
| <i>circFBXO7</i> | miR-4711-5p                 | 2 |
| <i>circFBXO7</i> | miR-4712-3p                 | 1 |
| <i>circFBXO7</i> | miR-4727-5p                 | 2 |
| <i>circFBXO7</i> | miR-4729                    | 1 |
| <i>circFBXO7</i> | miR-4732-3p                 | 1 |
| <i>circFBXO7</i> | miR-4747-3p                 | 2 |
| <i>circFBXO7</i> | miR-4756-3p                 | 1 |
| <i>circFBXO7</i> | miR-4762-3p                 | 2 |
| <i>circFBXO7</i> | miR-4769-3p/6817-5p         | 2 |
| <i>circFBXO7</i> | miR-4773                    | 1 |
| <i>circFBXO7</i> | miR-4787-3p                 | 2 |
| <i>circFBXO7</i> | miR-4789-5p                 | 1 |
| <i>circFBXO7</i> | miR-4792                    | 1 |
| <i>circFBXO7</i> | miR-4797-5p                 | 1 |
| <i>circFBXO7</i> | miR-490-3p                  | 3 |
| <i>circFBXO7</i> | miR-490-5p                  | 1 |
| <i>circFBXO7</i> | miR-4999-3p                 | 1 |
| <i>circFBXO7</i> | miR-5001-3p                 | 2 |
| <i>circFBXO7</i> | miR-5008-3p/6737-3p/7157-3p | 2 |
| <i>circFBXO7</i> | miR-505-3p.2                | 1 |
| <i>circFBXO7</i> | miR-508-5p                  | 1 |
| <i>circFBXO7</i> | miR-5088-3p                 | 1 |
| <i>circFBXO7</i> | miR-509-3-5p/509-5p/4418    | 1 |
| <i>circFBXO7</i> | miR-512-3p                  | 1 |
| <i>circFBXO7</i> | miR-512-5p                  | 2 |
| <i>circFBXO7</i> | miR-513a-3p/513c-3p/3606-3p | 2 |
| <i>circFBXO7</i> | miR-5191                    | 2 |
| <i>circFBXO7</i> | miR-5197-3p                 | 1 |

|                  |                     |   |
|------------------|---------------------|---|
| <i>circFBXO7</i> | miR-519d-5p         | 1 |
| <i>circFBXO7</i> | miR-520f-5p         | 1 |
| <i>circFBXO7</i> | miR-541-5p          | 2 |
| <i>circFBXO7</i> | miR-544b            | 1 |
| <i>circFBXO7</i> | miR-545-3p          | 1 |
| <i>circFBXO7</i> | miR-548an           | 1 |
| <i>circFBXO7</i> | miR-550b-2-5p       | 2 |
| <i>circFBXO7</i> | miR-552-3p          | 1 |
| <i>circFBXO7</i> | miR-5582-5p         | 1 |
| <i>circFBXO7</i> | miR-5590-5p         | 2 |
| <i>circFBXO7</i> | miR-561-5p          | 1 |
| <i>circFBXO7</i> | miR-567             | 1 |
| <i>circFBXO7</i> | miR-5695            | 1 |
| <i>circFBXO7</i> | miR-5696            | 1 |
| <i>circFBXO7</i> | miR-5704            | 2 |
| <i>circFBXO7</i> | miR-576-3p          | 1 |
| <i>circFBXO7</i> | miR-579-3p          | 1 |
| <i>circFBXO7</i> | miR-580-3p          | 1 |
| <i>circFBXO7</i> | miR-582-3p          | 2 |
| <i>circFBXO7</i> | miR-586             | 1 |
| <i>circFBXO7</i> | miR-589-3p          | 1 |
| <i>circFBXO7</i> | miR-590-3p          | 2 |
| <i>circFBXO7</i> | miR-597-3p          | 2 |
| <i>circFBXO7</i> | miR-607             | 2 |
| <i>circFBXO7</i> | miR-624-3p          | 1 |
| <i>circFBXO7</i> | miR-629-3p          | 1 |
| <i>circFBXO7</i> | miR-636             | 1 |
| <i>circFBXO7</i> | miR-645             | 2 |
| <i>circFBXO7</i> | miR-649             | 3 |
| <i>circFBXO7</i> | miR-6501-3p         | 1 |
| <i>circFBXO7</i> | miR-6509-3p         | 1 |
| <i>circFBXO7</i> | miR-658             | 1 |
| <i>circFBXO7</i> | miR-6728-3p         | 2 |
| <i>circFBXO7</i> | miR-6734-3p         | 1 |
| <i>circFBXO7</i> | miR-6757-5p         | 2 |
| <i>circFBXO7</i> | miR-6758-5p/6856-5p | 1 |
| <i>circFBXO7</i> | miR-6767-5p         | 1 |
| <i>circFBXO7</i> | miR-6768-3p         | 1 |

|                  |                     |   |
|------------------|---------------------|---|
| <i>circFBXO7</i> | miR-6768-5p         | 1 |
| <i>circFBXO7</i> | miR-6770-5p         | 1 |
| <i>circFBXO7</i> | miR-6787-3p         | 2 |
| <i>circFBXO7</i> | miR-6803-3p         | 1 |
| <i>circFBXO7</i> | miR-6814-3p/6872-5p | 1 |
| <i>circFBXO7</i> | miR-6815-3p         | 1 |
| <i>circFBXO7</i> | miR-6839-3p         | 1 |
| <i>circFBXO7</i> | miR-6851-3p         | 2 |
| <i>circFBXO7</i> | miR-6866-5p         | 1 |
| <i>circFBXO7</i> | miR-6886-3p         | 1 |
| <i>circFBXO7</i> | miR-6889-3p         | 2 |
| <i>circFBXO7</i> | miR-6892-3p         | 2 |
| <i>circFBXO7</i> | miR-7108-5p         | 1 |
| <i>circFBXO7</i> | miR-7112-3p         | 2 |
| <i>circFBXO7</i> | miR-7156-3p         | 1 |
| <i>circFBXO7</i> | miR-7158-5p         | 1 |
| <i>circFBXO7</i> | miR-7159-5p         | 1 |
| <i>circFBXO7</i> | miR-7162-3p         | 3 |
| <i>circFBXO7</i> | miR-7846-3p         | 1 |
| <i>circFBXO7</i> | miR-7976            | 1 |
| <i>circFBXO7</i> | miR-8063            | 2 |
| <i>circFBXO7</i> | miR-8064            | 1 |
| <i>circFBXO7</i> | miR-8066            | 1 |
| <i>circFBXO7</i> | miR-8075            | 1 |
| <i>circFBXO7</i> | miR-874-3p          | 5 |
| <i>circFBXO7</i> | miR-877-5p          | 1 |
| <i>circFBXO7</i> | miR-891a-3p         | 1 |
| <i>circFBXO7</i> | miR-9-5p            | 1 |
| <i>circFBXO7</i> | miR-938             | 1 |
| <i>circFBXO7</i> | miR-96-5p/1271-5p   | 1 |
| <i>circFER</i>   | miR-1-5p            | 1 |
| <i>circFER</i>   | miR-101-5p          | 1 |
| <i>circFER</i>   | miR-1229-3p         | 1 |
| <i>circFER</i>   | miR-1236-3p         | 3 |
| <i>circFER</i>   | miR-1238-3p         | 1 |
| <i>circFER</i>   | miR-1238-5p/4758-5p | 1 |
| <i>circFER</i>   | miR-1250-3p         | 3 |
| <i>circFER</i>   | miR-1251-3p         | 1 |

|                |                                      |   |
|----------------|--------------------------------------|---|
| <i>circFER</i> | miR-126-5p                           | 1 |
| <i>circFER</i> | miR-1277-5p                          | 1 |
| <i>circFER</i> | miR-1284                             | 1 |
| <i>circFER</i> | miR-1285-5p                          | 2 |
| <i>circFER</i> | miR-1289                             | 1 |
| <i>circFER</i> | miR-1298-3p                          | 1 |
| <i>circFER</i> | miR-1305                             | 3 |
| <i>circFER</i> | miR-130b-5p                          | 1 |
| <i>circFER</i> | miR-1323                             | 1 |
| <i>circFER</i> | miR-138-2-3p                         | 2 |
| <i>circFER</i> | miR-141-5p                           | 2 |
| <i>circFER</i> | miR-144-5p                           | 1 |
| <i>circFER</i> | miR-145-5p                           | 1 |
| <i>circFER</i> | miR-146a-3p                          | 2 |
| <i>circFER</i> | miR-148a-5p                          | 1 |
| <i>circFER</i> | miR-148b-5p/6874-3p                  | 1 |
| <i>circFER</i> | miR-149-5p                           | 1 |
| <i>circFER</i> | miR-15-5p/16-5p/195-5p/424-5p/497-5p | 4 |
| <i>circFER</i> | miR-153-3p                           | 1 |
| <i>circFER</i> | miR-153-5p                           | 3 |
| <i>circFER</i> | miR-1537-5p                          | 1 |
| <i>circFER</i> | miR-154-3p/487-3p                    | 3 |
| <i>circFER</i> | miR-181-5p                           | 1 |
| <i>circFER</i> | miR-185-3p                           | 1 |
| <i>circFER</i> | miR-19-3p                            | 1 |
| <i>circFER</i> | miR-1909-3p/6722-3p                  | 1 |
| <i>circFER</i> | miR-1909-5p                          | 1 |
| <i>circFER</i> | miR-198                              | 1 |
| <i>circFER</i> | miR-200-3p/429                       | 1 |
| <i>circFER</i> | miR-2053                             | 1 |
| <i>circFER</i> | miR-210-5p                           | 1 |
| <i>circFER</i> | miR-2116-5p                          | 2 |
| <i>circFER</i> | miR-212-5p                           | 1 |
| <i>circFER</i> | miR-216a-5p                          | 1 |
| <i>circFER</i> | miR-216b-5p                          | 1 |
| <i>circFER</i> | miR-219-5p                           | 1 |
| <i>circFER</i> | miR-22-5p                            | 2 |
| <i>circFER</i> | miR-223-5p                           | 2 |

|                |                                   |   |
|----------------|-----------------------------------|---|
| <i>circFER</i> | miR-26b-3p                        | 2 |
| <i>circFER</i> | miR-30-3p                         | 1 |
| <i>circFER</i> | miR-302c-3p.2/520-3p              | 2 |
| <i>circFER</i> | miR-3064-5p                       | 2 |
| <i>circFER</i> | miR-3074-3p                       | 2 |
| <i>circFER</i> | miR-3119                          | 1 |
| <i>circFER</i> | miR-3121-5p                       | 1 |
| <i>circFER</i> | miR-3126-3p                       | 1 |
| <i>circFER</i> | miR-3127-3p/6756-3p               | 1 |
| <i>circFER</i> | miR-3134                          | 1 |
| <i>circFER</i> | miR-3140-3p                       | 1 |
| <i>circFER</i> | miR-3140-5p                       | 1 |
| <i>circFER</i> | miR-3144-3p                       | 1 |
| <i>circFER</i> | miR-3145-5p                       | 2 |
| <i>circFER</i> | miR-3149                          | 2 |
| <i>circFER</i> | miR-3152-5p                       | 1 |
| <i>circFER</i> | miR-3160-3p                       | 2 |
| <i>circFER</i> | miR-3168                          | 1 |
| <i>circFER</i> | miR-3173-3p/6891-5p               | 1 |
| <i>circFER</i> | miR-3180-5p                       | 1 |
| <i>circFER</i> | miR-3189-3p                       | 1 |
| <i>circFER</i> | miR-3192-3p                       | 2 |
| <i>circFER</i> | miR-323-3p                        | 2 |
| <i>circFER</i> | miR-323b-3p                       | 1 |
| <i>circFER</i> | miR-330-3p.2                      | 2 |
| <i>circFER</i> | miR-335-3p                        | 3 |
| <i>circFER</i> | miR-342-3p                        | 1 |
| <i>circFER</i> | miR-345-3p                        | 1 |
| <i>circFER</i> | miR-3611                          | 1 |
| <i>circFER</i> | miR-3671                          | 1 |
| <i>circFER</i> | miR-3675-3p                       | 4 |
| <i>circFER</i> | miR-3680-3p                       | 1 |
| <i>circFER</i> | miR-3686                          | 1 |
| <i>circFER</i> | miR-3689a-5p/3689b-5p/3689e/3689f | 1 |
| <i>circFER</i> | miR-369-3p                        | 1 |
| <i>circFER</i> | miR-3692-3p                       | 1 |
| <i>circFER</i> | miR-3692-5p                       | 4 |
| <i>circFER</i> | miR-374-5p/655-3p                 | 1 |

|                |                           |   |
|----------------|---------------------------|---|
| <i>circFER</i> | miR-374a-3p               | 1 |
| <i>circFER</i> | miR-374b-3p               | 1 |
| <i>circFER</i> | miR-382-3p                | 1 |
| <i>circFER</i> | miR-3920                  | 2 |
| <i>circFER</i> | miR-3942-3p               | 1 |
| <i>circFER</i> | miR-421                   | 1 |
| <i>circFER</i> | miR-4271/4725-3p/6780b-5p | 1 |
| <i>circFER</i> | miR-4273/7156-5p          | 2 |
| <i>circFER</i> | miR-4289                  | 1 |
| <i>circFER</i> | miR-4294                  | 1 |
| <i>circFER</i> | miR-4326                  | 1 |
| <i>circFER</i> | miR-4422                  | 2 |
| <i>circFER</i> | miR-4428                  | 1 |
| <i>circFER</i> | miR-4432                  | 1 |
| <i>circFER</i> | miR-4433b-3p              | 1 |
| <i>circFER</i> | miR-4445-5p               | 1 |
| <i>circFER</i> | miR-4457                  | 1 |
| <i>circFER</i> | miR-4463                  | 1 |
| <i>circFER</i> | miR-4474-3p               | 1 |
| <i>circFER</i> | miR-4476/6876-5p          | 5 |
| <i>circFER</i> | miR-448                   | 1 |
| <i>circFER</i> | miR-4487                  | 2 |
| <i>circFER</i> | miR-4494                  | 2 |
| <i>circFER</i> | miR-4499                  | 1 |
| <i>circFER</i> | miR-4502                  | 5 |
| <i>circFER</i> | miR-4504                  | 2 |
| <i>circFER</i> | miR-450b-5p               | 1 |
| <i>circFER</i> | miR-4520-3p               | 1 |
| <i>circFER</i> | miR-4524-5p               | 1 |
| <i>circFER</i> | miR-4534/8082             | 1 |
| <i>circFER</i> | miR-4633-3p/6500-5p       | 1 |
| <i>circFER</i> | miR-4652-3p               | 2 |
| <i>circFER</i> | miR-4658/6790-5p          | 1 |
| <i>circFER</i> | miR-4659a-3p/4659b-3p     | 5 |
| <i>circFER</i> | miR-4661-3p               | 1 |
| <i>circFER</i> | miR-4670-3p               | 3 |
| <i>circFER</i> | miR-4677-3p               | 2 |
| <i>circFER</i> | miR-4677-5p               | 2 |

|                |                             |   |
|----------------|-----------------------------|---|
| <i>circFER</i> | miR-4679                    | 2 |
| <i>circFER</i> | miR-4684-5p                 | 1 |
| <i>circFER</i> | miR-4686                    | 1 |
| <i>circFER</i> | miR-4687-3p                 | 2 |
| <i>circFER</i> | miR-4690-5p                 | 1 |
| <i>circFER</i> | miR-4691-5p/6792-3p         | 1 |
| <i>circFER</i> | miR-4695-3p                 | 2 |
| <i>circFER</i> | miR-4699-5p                 | 3 |
| <i>circFER</i> | miR-4709-3p                 | 3 |
| <i>circFER</i> | miR-4717-3p                 | 2 |
| <i>circFER</i> | miR-4718                    | 1 |
| <i>circFER</i> | miR-4724-3p                 | 1 |
| <i>circFER</i> | miR-4742-3p                 | 1 |
| <i>circFER</i> | miR-4743-3p                 | 2 |
| <i>circFER</i> | miR-4747-5p/5196-5p         | 3 |
| <i>circFER</i> | miR-4749-3p                 | 1 |
| <i>circFER</i> | miR-4753-3p                 | 2 |
| <i>circFER</i> | miR-4762-3p                 | 2 |
| <i>circFER</i> | miR-4764-3p                 | 2 |
| <i>circFER</i> | miR-4768-5p/6833-3p         | 2 |
| <i>circFER</i> | miR-4774-3p                 | 1 |
| <i>circFER</i> | miR-4778-3p                 | 6 |
| <i>circFER</i> | miR-4778-5p                 | 2 |
| <i>circFER</i> | miR-4795-5p                 | 1 |
| <i>circFER</i> | miR-4802-5p                 | 2 |
| <i>circFER</i> | miR-4803                    | 2 |
| <i>circFER</i> | miR-487a-5p/487b-5p         | 1 |
| <i>circFER</i> | miR-489-5p                  | 1 |
| <i>circFER</i> | miR-4999-5p                 | 1 |
| <i>circFER</i> | miR-499b-5p                 | 2 |
| <i>circFER</i> | miR-5008-3p/6737-3p/7157-3p | 1 |
| <i>circFER</i> | miR-502-5p                  | 3 |
| <i>circFER</i> | miR-503-5p                  | 4 |
| <i>circFER</i> | miR-505-3p.2                | 1 |
| <i>circFER</i> | miR-505-5p                  | 1 |
| <i>circFER</i> | miR-507/557                 | 1 |
| <i>circFER</i> | miR-508-3p                  | 1 |
| <i>circFER</i> | miR-508-5p                  | 2 |

|                |                    |   |
|----------------|--------------------|---|
| <i>circFER</i> | miR-512-3p         | 2 |
| <i>circFER</i> | miR-513b-5p        | 1 |
| <i>circFER</i> | miR-518a-5p/527    | 3 |
| <i>circFER</i> | miR-5193           | 2 |
| <i>circFER</i> | miR-5197-3p        | 1 |
| <i>circFER</i> | miR-519d-5p        | 1 |
| <i>circFER</i> | miR-520f-5p        | 1 |
| <i>circFER</i> | miR-525-5p         | 1 |
| <i>circFER</i> | miR-542-3p         | 2 |
| <i>circFER</i> | miR-543            | 2 |
| <i>circFER</i> | miR-544a           | 3 |
| <i>circFER</i> | miR-545-3p         | 1 |
| <i>circFER</i> | miR-545-5p         | 1 |
| <i>circFER</i> | miR-548ao-5p/548ax | 1 |
| <i>circFER</i> | miR-548aw          | 3 |
| <i>circFER</i> | miR-548e-5p        | 1 |
| <i>circFER</i> | miR-550b-2-5p      | 2 |
| <i>circFER</i> | miR-5571-5p        | 3 |
| <i>circFER</i> | miR-558            | 2 |
| <i>circFER</i> | miR-5580-3p        | 4 |
| <i>circFER</i> | miR-5584-3p        | 1 |
| <i>circFER</i> | miR-5585-5p        | 1 |
| <i>circFER</i> | miR-5684           | 1 |
| <i>circFER</i> | miR-5692bc         | 1 |
| <i>circFER</i> | miR-5695           | 1 |
| <i>circFER</i> | miR-5696           | 3 |
| <i>circFER</i> | miR-5701           | 1 |
| <i>circFER</i> | miR-572            | 1 |
| <i>circFER</i> | miR-573/3616-5p    | 1 |
| <i>circFER</i> | miR-578            | 5 |
| <i>circFER</i> | miR-579-3p         | 3 |
| <i>circFER</i> | miR-595            | 1 |
| <i>circFER</i> | miR-6071           | 3 |
| <i>circFER</i> | miR-6132/6836-5p   | 1 |
| <i>circFER</i> | miR-614            | 1 |
| <i>circFER</i> | miR-6165           | 1 |
| <i>circFER</i> | miR-617            | 2 |
| <i>circFER</i> | miR-618            | 1 |



|                |                     |   |
|----------------|---------------------|---|
| <i>circFER</i> | miR-630             | 2 |
| <i>circFER</i> | miR-636             | 1 |
| <i>circFER</i> | miR-646             | 4 |
| <i>circFER</i> | miR-647             | 2 |
| <i>circFER</i> | miR-648             | 1 |
| <i>circFER</i> | miR-6505-3p         | 2 |
| <i>circFER</i> | miR-6506-3p         | 1 |
| <i>circFER</i> | miR-651-3p          | 3 |
| <i>circFER</i> | miR-6510-3p         | 1 |
| <i>circFER</i> | miR-6510-5p         | 1 |
| <i>circFER</i> | miR-6514-3p         | 1 |
| <i>circFER</i> | miR-6514-5p         | 2 |
| <i>circFER</i> | miR-6515-3p         | 3 |
| <i>circFER</i> | miR-660-3p          | 2 |
| <i>circFER</i> | miR-664a-3p         | 1 |
| <i>circFER</i> | miR-664a-5p/4794    | 1 |
| <i>circFER</i> | miR-665             | 1 |
| <i>circFER</i> | miR-670-3p          | 1 |
| <i>circFER</i> | miR-6715b-3p        | 1 |
| <i>circFER</i> | miR-6738-3p         | 3 |
| <i>circFER</i> | miR-6739-3p         | 2 |
| <i>circFER</i> | miR-6749-3p         | 1 |
| <i>circFER</i> | miR-6758-3p         | 1 |
| <i>circFER</i> | miR-676-5p          | 5 |
| <i>circFER</i> | miR-6778-3p         | 1 |
| <i>circFER</i> | miR-6780a-3p        | 3 |
| <i>circFER</i> | miR-6782-3p         | 1 |
| <i>circFER</i> | miR-6783-5p         | 1 |
| <i>circFER</i> | miR-6791-3p/6829-3p | 1 |
| <i>circFER</i> | miR-6798-5p         | 1 |
| <i>circFER</i> | miR-6808-3p         | 1 |
| <i>circFER</i> | miR-6809-3p         | 2 |
| <i>circFER</i> | miR-6819-3p/6877-3p | 1 |
| <i>circFER</i> | miR-6828-3p         | 3 |
| <i>circFER</i> | miR-6832-3p         | 1 |
| <i>circFER</i> | miR-6842-3p         | 2 |
| <i>circFER</i> | miR-6856-3p         | 2 |
| <i>circFER</i> | miR-6874-5p         | 1 |

|                |                                       |   |
|----------------|---------------------------------------|---|
| <i>circFER</i> | miR-6875-3p                           | 5 |
| <i>circFER</i> | miR-6878-3p                           | 1 |
| <i>circFER</i> | miR-6881-3p                           | 3 |
| <i>circFER</i> | miR-6882-5p                           | 1 |
| <i>circFER</i> | miR-6889-3p                           | 1 |
| <i>circFER</i> | miR-6894-3p                           | 1 |
| <i>circFER</i> | miR-7108-5p                           | 1 |
| <i>circFER</i> | miR-7111-3p                           | 3 |
| <i>circFER</i> | miR-7159-5p                           | 1 |
| <i>circFER</i> | miR-718                               | 1 |
| <i>circFER</i> | miR-7641                              | 3 |
| <i>circFER</i> | miR-7974                              | 2 |
| <i>circFER</i> | miR-802                               | 1 |
| <i>circFER</i> | miR-8055                              | 2 |
| <i>circFER</i> | miR-8070                              | 1 |
| <i>circFER</i> | miR-8081                              | 3 |
| <i>circFER</i> | miR-8084                              | 1 |
| <i>circFER</i> | miR-8087                              | 1 |
| <i>circFER</i> | miR-93-3p                             | 4 |
| <i>circFER</i> | miR-942-5p                            | 2 |
| <i>circFER</i> | miR-944                               | 1 |
| <i>circFER</i> | miR-95-3p                             | 1 |
| <i>circFER</i> | let-7a-3p/let-7b-3p/let-7f-1-3p/98-3p | 3 |
| <i>circFER</i> | let-7f-2-3p/1185-3p                   | 3 |
| <i>circFER</i> | let-7i-3p                             | 1 |
| <i>circFER</i> | miR-1-3p/206                          | 1 |
| <i>circFER</i> | miR-10-5p                             | 1 |
| <i>circFER</i> | miR-103-3p/107                        | 3 |
| <i>circFER</i> | miR-103a-2-5p                         | 5 |
| <i>circFER</i> | miR-1179                              | 1 |
| <i>circFER</i> | miR-1197                              | 3 |
| <i>circFER</i> | miR-1200                              | 3 |
| <i>circFER</i> | miR-1207-3p                           | 2 |
| <i>circFER</i> | miR-1224-5p                           | 6 |
| <i>circFER</i> | miR-1226-3p                           | 1 |
| <i>circFER</i> | miR-1233-3p                           | 2 |
| <i>circFER</i> | miR-1245a/8079                        | 2 |
| <i>circFER</i> | miR-125-5p                            | 2 |

|                |                                     |   |
|----------------|-------------------------------------|---|
| <i>circFER</i> | miR-1255a/1255b-5p                  | 2 |
| <i>circFER</i> | miR-1261                            | 1 |
| <i>circFER</i> | miR-1263                            | 2 |
| <i>circFER</i> | miR-1264                            | 3 |
| <i>circFER</i> | miR-1265                            | 1 |
| <i>circFER</i> | miR-1266-3p                         | 2 |
| <i>circFER</i> | miR-1269                            | 3 |
| <i>circFER</i> | miR-1270                            | 5 |
| <i>circFER</i> | miR-1272                            | 1 |
| <i>circFER</i> | miR-1273d                           | 1 |
| <i>circFER</i> | miR-1273e                           | 1 |
| <i>circFER</i> | miR-1273h-3p                        | 3 |
| <i>circFER</i> | miR-1279                            | 6 |
| <i>circFER</i> | miR-1295b-5p/1912                   | 1 |
| <i>circFER</i> | miR-1296-3p                         | 2 |
| <i>circFER</i> | miR-130-3p/301-3p/454-3p            | 2 |
| <i>circFER</i> | miR-1304-3p                         | 2 |
| <i>circFER</i> | miR-1304-5p                         | 2 |
| <i>circFER</i> | miR-132-3p/212-3p                   | 1 |
| <i>circFER</i> | miR-1322                            | 1 |
| <i>circFER</i> | miR-136-5p                          | 2 |
| <i>circFER</i> | miR-137                             | 1 |
| <i>circFER</i> | miR-139-3p                          | 4 |
| <i>circFER</i> | miR-142-5p                          | 1 |
| <i>circFER</i> | miR-145-3p                          | 3 |
| <i>circFER</i> | miR-147a                            | 1 |
| <i>circFER</i> | miR-148-3p/152-3p                   | 3 |
| <i>circFER</i> | miR-150-3p                          | 2 |
| <i>circFER</i> | miR-150-5p                          | 2 |
| <i>circFER</i> | miR-1539                            | 1 |
| <i>circFER</i> | miR-16-2-3p/195-3p                  | 2 |
| <i>circFER</i> | miR-17-5p/20-5p/93-5p/106-5p/519-3p | 1 |
| <i>circFER</i> | miR-181-3p/4420                     | 1 |
| <i>circFER</i> | miR-1825                            | 3 |
| <i>circFER</i> | miR-19-5p                           | 1 |
| <i>circFER</i> | miR-190a-3p                         | 2 |
| <i>circFER</i> | miR-191-3p                          | 1 |
| <i>circFER</i> | miR-1910-5p                         | 1 |

|                |                                              |   |
|----------------|----------------------------------------------|---|
| <i>circFER</i> | miR-1915-5p                                  | 2 |
| <i>circFER</i> | miR-192-3p                                   | 1 |
| <i>circFER</i> | miR-192-5p/215-5p                            | 3 |
| <i>circFER</i> | miR-194-3p                                   | 4 |
| <i>circFER</i> | miR-197-3p                                   | 4 |
| <i>circFER</i> | miR-199-5p                                   | 3 |
| <i>circFER</i> | miR-204-3p/4646-5p                           | 1 |
| <i>circFER</i> | miR-204-5p/211-5p                            | 1 |
| <i>circFER</i> | miR-205-3p                                   | 4 |
| <i>circFER</i> | miR-2052                                     | 1 |
| <i>circFER</i> | miR-211-3p                                   | 2 |
| <i>circFER</i> | miR-2113                                     | 2 |
| <i>circFER</i> | miR-2115-3p                                  | 2 |
| <i>circFER</i> | miR-2116-3p                                  | 2 |
| <i>circFER</i> | miR-214-3p/3619-5p                           | 7 |
| <i>circFER</i> | miR-219a-2-3p                                | 1 |
| <i>circFER</i> | miR-219b-3p                                  | 1 |
| <i>circFER</i> | miR-224-5p                                   | 2 |
| <i>circFER</i> | miR-2355-3p                                  | 1 |
| <i>circFER</i> | miR-24-3p                                    | 3 |
| <i>circFER</i> | miR-25-3p/32-5p/92-3p/363-3p/367-3p          | 1 |
| <i>circFER</i> | miR-26-3p                                    | 1 |
| <i>circFER</i> | miR-2681-5p                                  | 3 |
| <i>circFER</i> | miR-27b-5p                                   | 1 |
| <i>circFER</i> | miR-296-5p                                   | 2 |
| <i>circFER</i> | miR-297                                      | 1 |
| <i>circFER</i> | miR-298                                      | 2 |
| <i>circFER</i> | miR-299-3p                                   | 3 |
| <i>circFER</i> | miR-29a-5p                                   | 2 |
| <i>circFER</i> | miR-302-3p/372-3p/373-3p/520-3p              | 1 |
| <i>circFER</i> | miR-302b-5p/302d-5p                          | 3 |
| <i>circFER</i> | miR-302c-5p                                  | 3 |
| <i>circFER</i> | miR-302f                                     | 1 |
| <i>circFER</i> | miR-3065-3p                                  | 1 |
| <i>circFER</i> | miR-3074-5p                                  | 3 |
| <i>circFER</i> | miR-30b-3p/1273h-5p/3689-3p/6779-5p/6780a-5p | 2 |
| <i>circFER</i> | miR-30c-3p/6788-5p                           | 2 |
| <i>circFER</i> | miR-3120-3p                                  | 2 |

|                |                           |   |
|----------------|---------------------------|---|
| <i>circFER</i> | miR-3120-5p               | 1 |
| <i>circFER</i> | miR-3122/3913-5p          | 3 |
| <i>circFER</i> | miR-3130-5p/4482-5p       | 1 |
| <i>circFER</i> | miR-3136-3p/7155-3p       | 2 |
| <i>circFER</i> | miR-3136-5p/4439          | 2 |
| <i>circFER</i> | miR-3138                  | 4 |
| <i>circFER</i> | miR-3151-3p               | 5 |
| <i>circFER</i> | miR-3156-5p               | 2 |
| <i>circFER</i> | miR-3157-3p               | 3 |
| <i>circFER</i> | miR-3159                  | 4 |
| <i>circFER</i> | miR-3161                  | 2 |
| <i>circFER</i> | miR-3163                  | 1 |
| <i>circFER</i> | miR-3171                  | 1 |
| <i>circFER</i> | miR-3182                  | 3 |
| <i>circFER</i> | miR-3184-3p               | 3 |
| <i>circFER</i> | miR-3190-3p               | 2 |
| <i>circFER</i> | miR-3191-5p               | 2 |
| <i>circFER</i> | miR-3192-5p               | 1 |
| <i>circFER</i> | miR-32-3p                 | 2 |
| <i>circFER</i> | miR-3202                  | 3 |
| <i>circFER</i> | miR-328-3p                | 2 |
| <i>circFER</i> | miR-331-3p                | 1 |
| <i>circFER</i> | miR-337-3p                | 1 |
| <i>circFER</i> | miR-338-3p                | 5 |
| <i>circFER</i> | miR-338-5p                | 1 |
| <i>circFER</i> | miR-33a-3p                | 1 |
| <i>circFER</i> | miR-33b-3p/515-3p/519e-3p | 1 |
| <i>circFER</i> | miR-3591-5p               | 1 |
| <i>circFER</i> | miR-3606-5p               | 4 |
| <i>circFER</i> | miR-3607-3p               | 2 |
| <i>circFER</i> | miR-361-5p                | 1 |
| <i>circFER</i> | miR-3613-3p               | 2 |
| <i>circFER</i> | miR-3613-5p               | 2 |
| <i>circFER</i> | miR-3614-5p               | 3 |
| <i>circFER</i> | miR-3615                  | 3 |
| <i>circFER</i> | miR-362-5p/500b-5p        | 5 |
| <i>circFER</i> | miR-3622a-3p/3622b-3p     | 1 |
| <i>circFER</i> | miR-3655                  | 1 |

|                |                           |   |
|----------------|---------------------------|---|
| <i>circFER</i> | miR-3662                  | 3 |
| <i>circFER</i> | miR-3668                  | 1 |
| <i>circFER</i> | miR-3678-3p               | 3 |
| <i>circFER</i> | miR-3680-5p               | 1 |
| <i>circFER</i> | miR-3682-3p               | 3 |
| <i>circFER</i> | miR-3682-5p               | 2 |
| <i>circFER</i> | miR-371-5p                | 3 |
| <i>circFER</i> | miR-371a-3p               | 1 |
| <i>circFER</i> | miR-371b-3p               | 1 |
| <i>circFER</i> | miR-371b-5p/373-5p/616-5p | 3 |
| <i>circFER</i> | miR-372-5p                | 3 |
| <i>circFER</i> | miR-375                   | 1 |
| <i>circFER</i> | miR-376a-2-5p             | 1 |
| <i>circFER</i> | miR-376a-5p               | 1 |
| <i>circFER</i> | miR-376b-5p/376c-5p       | 1 |
| <i>circFER</i> | miR-378a-5p               | 3 |
| <i>circFER</i> | miR-380-3p                | 1 |
| <i>circFER</i> | miR-382-5p                | 1 |
| <i>circFER</i> | miR-383-3p                | 1 |
| <i>circFER</i> | miR-383-5p.2              | 2 |
| <i>circFER</i> | miR-3908                  | 1 |
| <i>circFER</i> | miR-3912-5p               | 1 |
| <i>circFER</i> | miR-3913-3p               | 1 |
| <i>circFER</i> | miR-3915                  | 6 |
| <i>circFER</i> | miR-3925-3p               | 2 |
| <i>circFER</i> | miR-3928-3p               | 5 |
| <i>circFER</i> | miR-3929/4419b/4478       | 1 |
| <i>circFER</i> | miR-3934-3p               | 2 |
| <i>circFER</i> | miR-3942-5p               | 1 |
| <i>circFER</i> | miR-3944-5p               | 2 |
| <i>circFER</i> | miR-412-3p/6754-3p        | 2 |
| <i>circFER</i> | miR-425-5p                | 1 |
| <i>circFER</i> | miR-4251                  | 1 |
| <i>circFER</i> | miR-4267                  | 2 |
| <i>circFER</i> | miR-4270/4441/6754-5p     | 1 |
| <i>circFER</i> | miR-4272                  | 1 |
| <i>circFER</i> | miR-4277                  | 2 |
| <i>circFER</i> | miR-4279                  | 2 |

|                |                    |   |
|----------------|--------------------|---|
| <i>circFER</i> | miR-4282           | 8 |
| <i>circFER</i> | miR-4284           | 3 |
| <i>circFER</i> | miR-4290           | 1 |
| <i>circFER</i> | miR-4291           | 3 |
| <i>circFER</i> | miR-4307           | 5 |
| <i>circFER</i> | miR-4314           | 2 |
| <i>circFER</i> | miR-4320           | 2 |
| <i>circFER</i> | miR-4324           | 2 |
| <i>circFER</i> | miR-4329           | 1 |
| <i>circFER</i> | miR-433-3p         | 1 |
| <i>circFER</i> | miR-4330           | 3 |
| <i>circFER</i> | miR-4417           | 2 |
| <i>circFER</i> | miR-4438           | 1 |
| <i>circFER</i> | miR-4446-5p        | 5 |
| <i>circFER</i> | miR-4462           | 1 |
| <i>circFER</i> | miR-4464/4748      | 1 |
| <i>circFER</i> | miR-4482-3p        | 2 |
| <i>circFER</i> | miR-4484           | 1 |
| <i>circFER</i> | miR-4491/4657      | 3 |
| <i>circFER</i> | miR-4493           | 2 |
| <i>circFER</i> | miR-4503           | 1 |
| <i>circFER</i> | miR-450a-1-3p      | 3 |
| <i>circFER</i> | miR-450b-3p/769-3p | 1 |
| <i>circFER</i> | miR-4513/6855-3p   | 1 |
| <i>circFER</i> | miR-4517           | 2 |
| <i>circFER</i> | miR-451b           | 2 |
| <i>circFER</i> | miR-4522           | 1 |
| <i>circFER</i> | miR-4524b-3p       | 2 |
| <i>circFER</i> | miR-4530           | 5 |
| <i>circFER</i> | miR-4531           | 5 |
| <i>circFER</i> | miR-4533           | 3 |
| <i>circFER</i> | miR-4537           | 2 |
| <i>circFER</i> | miR-4539           | 3 |
| <i>circFER</i> | miR-455-3p.1       | 1 |
| <i>circFER</i> | miR-455-5p         | 3 |
| <i>circFER</i> | miR-4645-3p        | 3 |
| <i>circFER</i> | miR-4646-3p        | 1 |
| <i>circFER</i> | miR-4649-3p        | 2 |

|                |                     |   |
|----------------|---------------------|---|
| <i>circFER</i> | miR-4655-3p         | 1 |
| <i>circFER</i> | miR-466             | 1 |
| <i>circFER</i> | miR-4666a-5p        | 3 |
| <i>circFER</i> | miR-4683            | 4 |
| <i>circFER</i> | miR-4689/6858-5p    | 6 |
| <i>circFER</i> | miR-4698            | 5 |
| <i>circFER</i> | miR-4699-3p         | 2 |
| <i>circFER</i> | miR-4700-3p         | 2 |
| <i>circFER</i> | miR-4708-3p         | 2 |
| <i>circFER</i> | miR-4709-5p         | 2 |
| <i>circFER</i> | miR-4713-5p         | 1 |
| <i>circFER</i> | miR-4724-5p         | 1 |
| <i>circFER</i> | miR-4727-5p         | 2 |
| <i>circFER</i> | miR-4732-3p         | 2 |
| <i>circFER</i> | miR-4733-3p         | 1 |
| <i>circFER</i> | miR-4735-5p         | 2 |
| <i>circFER</i> | miR-4751            | 2 |
| <i>circFER</i> | miR-4752            | 6 |
| <i>circFER</i> | miR-4755-5p/5006-3p | 2 |
| <i>circFER</i> | miR-4757-3p         | 1 |
| <i>circFER</i> | miR-4760-3p         | 1 |
| <i>circFER</i> | miR-4766-5p         | 1 |
| <i>circFER</i> | miR-4769-3p/6817-5p | 1 |
| <i>circFER</i> | miR-4780            | 1 |
| <i>circFER</i> | miR-4786-5p         | 1 |
| <i>circFER</i> | miR-4789-5p         | 3 |
| <i>circFER</i> | miR-4790-5p         | 1 |
| <i>circFER</i> | miR-4798-3p         | 1 |
| <i>circFER</i> | miR-4800-5p         | 4 |
| <i>circFER</i> | miR-483-3p.1        | 2 |
| <i>circFER</i> | miR-484/3155        | 1 |
| <i>circFER</i> | miR-489-3p          | 1 |
| <i>circFER</i> | miR-495-5p          | 1 |
| <i>circFER</i> | miR-5001-3p         | 2 |
| <i>circFER</i> | miR-5002-5p         | 1 |
| <i>circFER</i> | miR-5004-3p         | 1 |
| <i>circFER</i> | miR-5004-5p         | 2 |
| <i>circFER</i> | miR-5007-3p         | 3 |



|                |                             |   |
|----------------|-----------------------------|---|
| <i>circFER</i> | miR-5009-5p/8058            | 3 |
| <i>circFER</i> | miR-500a-3p                 | 1 |
| <i>circFER</i> | miR-501-5p                  | 5 |
| <i>circFER</i> | miR-5010-3p                 | 2 |
| <i>circFER</i> | miR-504-5p.1                | 1 |
| <i>circFER</i> | miR-506-5p                  | 2 |
| <i>circFER</i> | miR-5089-5p                 | 1 |
| <i>circFER</i> | miR-509-3p                  | 3 |
| <i>circFER</i> | miR-5095/7151-3p            | 3 |
| <i>circFER</i> | miR-510-3p                  | 1 |
| <i>circFER</i> | miR-511-5p                  | 1 |
| <i>circFER</i> | miR-513a-3p/513c-3p/3606-3p | 8 |
| <i>circFER</i> | miR-513b-3p                 | 2 |
| <i>circFER</i> | miR-513c-5p/514b-5p         | 3 |
| <i>circFER</i> | miR-514a-3p                 | 2 |
| <i>circFER</i> | miR-5187-5p                 | 1 |
| <i>circFER</i> | miR-519-3p                  | 1 |
| <i>circFER</i> | miR-5191                    | 1 |
| <i>circFER</i> | miR-526b-5p                 | 1 |
| <i>circFER</i> | miR-532-3p                  | 2 |
| <i>circFER</i> | miR-544b                    | 2 |
| <i>circFER</i> | miR-548ah-5p/3609           | 1 |
| <i>circFER</i> | miR-548an                   | 1 |
| <i>circFER</i> | miR-548ap-3p/548aa/548t-3p  | 2 |
| <i>circFER</i> | miR-548as-3p                | 2 |
| <i>circFER</i> | miR-548ay-3p/548at-3p       | 2 |
| <i>circFER</i> | miR-548az-5p/548t-5p        | 1 |
| <i>circFER</i> | miR-548c-3p                 | 3 |
| <i>circFER</i> | miR-548g-3p                 | 2 |
| <i>circFER</i> | miR-548n                    | 1 |
| <i>circFER</i> | miR-552-5p                  | 3 |
| <i>circFER</i> | miR-5579-5p                 | 3 |
| <i>circFER</i> | miR-5583-3p                 | 2 |
| <i>circFER</i> | miR-5584-5p                 | 3 |
| <i>circFER</i> | miR-5589-3p                 | 3 |
| <i>circFER</i> | miR-568                     | 2 |
| <i>circFER</i> | miR-5681a                   | 2 |
| <i>circFER</i> | miR-5692a                   | 1 |

|                |                    |   |
|----------------|--------------------|---|
| <i>circFER</i> | miR-5693           | 4 |
| <i>circFER</i> | miR-5694           | 2 |
| <i>circFER</i> | miR-570-3p         | 2 |
| <i>circFER</i> | miR-580-3p         | 2 |
| <i>circFER</i> | miR-580-5p         | 1 |
| <i>circFER</i> | miR-582-3p         | 1 |
| <i>circFER</i> | miR-584-3p         | 1 |
| <i>circFER</i> | miR-587            | 2 |
| <i>circFER</i> | miR-589-3p         | 2 |
| <i>circFER</i> | miR-590-3p         | 3 |
| <i>circFER</i> | miR-592            | 2 |
| <i>circFER</i> | miR-599            | 2 |
| <i>circFER</i> | miR-605-3p         | 2 |
| <i>circFER</i> | miR-606            | 2 |
| <i>circFER</i> | miR-607            | 1 |
| <i>circFER</i> | miR-6074           | 1 |
| <i>circFER</i> | miR-6077           | 4 |
| <i>circFER</i> | miR-6079           | 2 |
| <i>circFER</i> | miR-6083           | 2 |
| <i>circFER</i> | miR-6090           | 2 |
| <i>circFER</i> | miR-619-5p/6506-5p | 1 |
| <i>circFER</i> | miR-623            | 1 |
| <i>circFER</i> | miR-626/6876-3p    | 2 |
| <i>circFER</i> | miR-628-5p         | 3 |
| <i>circFER</i> | miR-629-3p         | 1 |
| <i>circFER</i> | miR-631/3661       | 2 |
| <i>circFER</i> | miR-640            | 3 |
| <i>circFER</i> | miR-643            | 3 |
| <i>circFER</i> | miR-6500-3p        | 3 |
| <i>circFER</i> | miR-6501-3p        | 3 |
| <i>circFER</i> | miR-6507-3p        | 1 |
| <i>circFER</i> | miR-651-5p         | 1 |
| <i>circFER</i> | miR-6513-5p        | 3 |
| <i>circFER</i> | miR-653-3p         | 1 |
| <i>circFER</i> | miR-653-5p         | 1 |
| <i>circFER</i> | miR-654-3p         | 3 |
| <i>circFER</i> | miR-670-5p         | 3 |
| <i>circFER</i> | miR-6716-5p        | 1 |

|                |                     |   |
|----------------|---------------------|---|
| <i>circFER</i> | miR-6720-5p         | 3 |
| <i>circFER</i> | miR-6724-5p/6773-5p | 2 |
| <i>circFER</i> | miR-6728-5p         | 1 |
| <i>circFER</i> | miR-6730-5p         | 2 |
| <i>circFER</i> | miR-6731-3p         | 1 |
| <i>circFER</i> | miR-6744-5p         | 2 |
| <i>circFER</i> | miR-675-3p          | 1 |
| <i>circFER</i> | miR-6750-3p         | 2 |
| <i>circFER</i> | miR-6750-5p/6822-5p | 3 |
| <i>circFER</i> | miR-6752-3p         | 2 |
| <i>circFER</i> | miR-6753-5p         | 1 |
| <i>circFER</i> | miR-676-3p          | 2 |
| <i>circFER</i> | miR-6761-5p         | 1 |
| <i>circFER</i> | miR-6765-3p         | 1 |
| <i>circFER</i> | miR-6768-3p         | 1 |
| <i>circFER</i> | miR-6771-3p         | 1 |
| <i>circFER</i> | miR-6772-3p         | 4 |
| <i>circFER</i> | miR-6780b-3p        | 1 |
| <i>circFER</i> | miR-6792-5p         | 1 |
| <i>circFER</i> | miR-6801-3p/6810-3p | 1 |
| <i>circFER</i> | miR-6803-3p         | 1 |
| <i>circFER</i> | miR-6814-3p/6872-5p | 1 |
| <i>circFER</i> | miR-6814-5p         | 2 |
| <i>circFER</i> | miR-6815-3p         | 3 |
| <i>circFER</i> | miR-6816-3p         | 1 |
| <i>circFER</i> | miR-6817-3p         | 2 |
| <i>circFER</i> | miR-6818-3p         | 2 |
| <i>circFER</i> | miR-6818-5p         | 1 |
| <i>circFER</i> | miR-6827-5p         | 1 |
| <i>circFER</i> | miR-6830-3p         | 2 |
| <i>circFER</i> | miR-6830-5p         | 3 |
| <i>circFER</i> | miR-6833-5p         | 6 |
| <i>circFER</i> | miR-6837-3p         | 2 |
| <i>circFER</i> | miR-6838-3p         | 1 |
| <i>circFER</i> | miR-6841-3p         | 2 |
| <i>circFER</i> | miR-6844            | 2 |
| <i>circFER</i> | miR-6857-3p         | 1 |
| <i>circFER</i> | miR-6867-3p         | 1 |

|                |                              |   |
|----------------|------------------------------|---|
| <i>circFER</i> | miR-6873-3p                  | 2 |
| <i>circFER</i> | miR-6884-3p                  | 1 |
| <i>circFER</i> | miR-6886-3p                  | 2 |
| <i>circFER</i> | miR-6888-3p                  | 1 |
| <i>circFER</i> | miR-7-5p                     | 4 |
| <i>circFER</i> | miR-7110-3p                  | 2 |
| <i>circFER</i> | miR-7114-5p                  | 3 |
| <i>circFER</i> | miR-7151-5p                  | 1 |
| <i>circFER</i> | miR-7152-5p                  | 3 |
| <i>circFER</i> | miR-7153-3p                  | 2 |
| <i>circFER</i> | miR-7154-5p                  | 1 |
| <i>circFER</i> | miR-7159-3p                  | 2 |
| <i>circFER</i> | miR-7161-3p                  | 2 |
| <i>circFER</i> | miR-7162-3p                  | 2 |
| <i>circFER</i> | miR-764                      | 1 |
| <i>circFER</i> | miR-766-3p                   | 2 |
| <i>circFER</i> | miR-767-3p                   | 4 |
| <i>circFER</i> | miR-767-5p                   | 3 |
| <i>circFER</i> | miR-769-5p                   | 1 |
| <i>circFER</i> | miR-770-5p                   | 3 |
| <i>circFER</i> | miR-7848-3p                  | 1 |
| <i>circFER</i> | miR-7850-5p                  | 2 |
| <i>circFER</i> | miR-7852-3p                  | 1 |
| <i>circFER</i> | miR-8062                     | 2 |
| <i>circFER</i> | miR-8063                     | 5 |
| <i>circFER</i> | miR-8066                     | 3 |
| <i>circFER</i> | miR-8075                     | 3 |
| <i>circFER</i> | miR-8080                     | 1 |
| <i>circFER</i> | miR-874-3p                   | 3 |
| <i>circFER</i> | miR-874-5p                   | 1 |
| <i>circFER</i> | miR-887-5p                   | 3 |
| <i>circFER</i> | miR-890                      | 1 |
| <i>circFER</i> | miR-892-5p                   | 2 |
| <i>circFER</i> | miR-892b                     | 2 |
| <i>circFER</i> | miR-9-3p                     | 2 |
| <i>circFER</i> | miR-920/4300/5591-5p/6726-5p | 2 |
| <i>circFER</i> | miR-921                      | 4 |
| <i>circFER</i> | miR-922                      | 7 |

|                |                     |   |
|----------------|---------------------|---|
| <i>circFER</i> | miR-935             | 1 |
| <i>circFER</i> | miR-938             | 2 |
| <i>circFER</i> | miR-943             | 2 |
| <i>circFER</i> | miR-9500            | 3 |
| <i>circFER</i> | miR-100-3p          | 1 |
| <i>circFER</i> | miR-101-3p.2        | 2 |
| <i>circFER</i> | miR-1184            | 1 |
| <i>circFER</i> | miR-1199-5p/6751-3p | 1 |
| <i>circFER</i> | miR-1202/3972       | 1 |
| <i>circFER</i> | miR-1205            | 1 |
| <i>circFER</i> | miR-1206            | 1 |
| <i>circFER</i> | miR-1207-5p/4763-3p | 1 |
| <i>circFER</i> | miR-1225-3p         | 1 |
| <i>circFER</i> | miR-1225-5p         | 1 |
| <i>circFER</i> | miR-1227-3p         | 1 |
| <i>circFER</i> | miR-1227-5p         | 1 |
| <i>circFER</i> | miR-1229-5p         | 1 |
| <i>circFER</i> | miR-1231            | 2 |
| <i>circFER</i> | miR-1237-3p         | 2 |
| <i>circFER</i> | miR-124-5p          | 1 |
| <i>circFER</i> | miR-1243            | 1 |
| <i>circFER</i> | miR-1245b-5p        | 1 |
| <i>circFER</i> | miR-1246            | 1 |
| <i>circFER</i> | miR-1248            | 2 |
| <i>circFER</i> | miR-1249-5p/6797-5p | 1 |
| <i>circFER</i> | miR-1254/3116       | 1 |
| <i>circFER</i> | miR-1255b-2-3p      | 1 |
| <i>circFER</i> | miR-125a-3p         | 1 |
| <i>circFER</i> | miR-1260a/1260b     | 1 |
| <i>circFER</i> | miR-1268a/1268b     | 1 |
| <i>circFER</i> | miR-127-5p          | 1 |
| <i>circFER</i> | miR-1273a           | 1 |
| <i>circFER</i> | miR-1273c           | 1 |
| <i>circFER</i> | miR-1273f           | 2 |
| <i>circFER</i> | miR-1273g-3p        | 1 |
| <i>circFER</i> | miR-1273g-5p        | 1 |
| <i>circFER</i> | miR-1276            | 3 |
| <i>circFER</i> | miR-1278            | 1 |

|                |                     |   |
|----------------|---------------------|---|
| <i>circFER</i> | miR-1287-5p         | 2 |
| <i>circFER</i> | miR-1288-3p         | 1 |
| <i>circFER</i> | miR-1288-5p         | 1 |
| <i>circFER</i> | miR-1294            | 1 |
| <i>circFER</i> | miR-133a-5p         | 2 |
| <i>circFER</i> | miR-134-3p          | 1 |
| <i>circFER</i> | miR-134-5p          | 1 |
| <i>circFER</i> | miR-1343-3p         | 1 |
| <i>circFER</i> | miR-135-5p          | 1 |
| <i>circFER</i> | miR-138-5p          | 2 |
| <i>circFER</i> | miR-139-5p          | 1 |
| <i>circFER</i> | miR-140-5p          | 1 |
| <i>circFER</i> | miR-141-3p/200-3p   | 1 |
| <i>circFER</i> | miR-143-3p          | 2 |
| <i>circFER</i> | miR-1468-3p         | 3 |
| <i>circFER</i> | miR-147b            | 1 |
| <i>circFER</i> | miR-1538/4745-3p    | 1 |
| <i>circFER</i> | miR-1587/3620-5p    | 1 |
| <i>circFER</i> | miR-16-1-3p         | 1 |
| <i>circFER</i> | miR-17-3p           | 1 |
| <i>circFER</i> | miR-18-5p           | 3 |
| <i>circFER</i> | miR-186-5p          | 1 |
| <i>circFER</i> | miR-188-3p          | 1 |
| <i>circFER</i> | miR-188-5p          | 1 |
| <i>circFER</i> | miR-18a-3p          | 1 |
| <i>circFER</i> | miR-1908-5p         | 1 |
| <i>circFER</i> | miR-193-3p          | 1 |
| <i>circFER</i> | miR-193a-5p         | 1 |
| <i>circFER</i> | miR-194-5p          | 1 |
| <i>circFER</i> | miR-1972            | 1 |
| <i>circFER</i> | miR-1976            | 1 |
| <i>circFER</i> | miR-202-3p          | 1 |
| <i>circFER</i> | miR-203a-5p         | 1 |
| <i>circFER</i> | miR-203b-3p         | 2 |
| <i>circFER</i> | miR-203b-5p/6718-5p | 2 |
| <i>circFER</i> | miR-205-5p          | 1 |
| <i>circFER</i> | miR-210-3p          | 1 |
| <i>circFER</i> | miR-2110            | 1 |

|                |                           |   |
|----------------|---------------------------|---|
| <i>circFER</i> | miR-2115-5p               | 1 |
| <i>circFER</i> | miR-215-3p                | 1 |
| <i>circFER</i> | miR-22-3p                 | 1 |
| <i>circFER</i> | miR-221-5p/8073           | 2 |
| <i>circFER</i> | miR-222-5p                | 2 |
| <i>circFER</i> | miR-223-3p                | 1 |
| <i>circFER</i> | miR-2276-5p               | 1 |
| <i>circFER</i> | miR-2278                  | 1 |
| <i>circFER</i> | miR-2467-3p               | 1 |
| <i>circFER</i> | miR-26-5p                 | 2 |
| <i>circFER</i> | miR-29-3p                 | 1 |
| <i>circFER</i> | miR-31-3p                 | 1 |
| <i>circFER</i> | miR-3123                  | 1 |
| <i>circFER</i> | miR-3124-3p               | 1 |
| <i>circFER</i> | miR-3125/3916/6859-5p     | 1 |
| <i>circFER</i> | miR-3126-5p               | 1 |
| <i>circFER</i> | miR-3133                  | 1 |
| <i>circFER</i> | miR-3135b                 | 2 |
| <i>circFER</i> | miR-3141                  | 1 |
| <i>circFER</i> | miR-3150a-3p              | 1 |
| <i>circFER</i> | miR-3150b-3p              | 1 |
| <i>circFER</i> | miR-3153/6733-5p/6739-5p  | 1 |
| <i>circFER</i> | miR-3156-3p               | 1 |
| <i>circFER</i> | miR-3157-5p               | 2 |
| <i>circFER</i> | miR-3158-5p               | 1 |
| <i>circFER</i> | miR-3164                  | 1 |
| <i>circFER</i> | miR-3165                  | 1 |
| <i>circFER</i> | miR-3174                  | 1 |
| <i>circFER</i> | miR-3175                  | 1 |
| <i>circFER</i> | miR-3176/3922-3p          | 2 |
| <i>circFER</i> | miR-3183/4723-3p/6769b-3p | 2 |
| <i>circFER</i> | miR-3189-5p               | 1 |
| <i>circFER</i> | miR-3190-5p               | 2 |
| <i>circFER</i> | miR-3193                  | 2 |
| <i>circFER</i> | miR-3194-5p               | 2 |
| <i>circFER</i> | miR-3200-3p               | 1 |
| <i>circFER</i> | miR-320e                  | 1 |
| <i>circFER</i> | miR-323a-5p               | 1 |

|                |                           |   |
|----------------|---------------------------|---|
| <i>circFER</i> | miR-323b-5p/410-5p/494-5p | 1 |
| <i>circFER</i> | miR-324-3p/1913           | 1 |
| <i>circFER</i> | miR-328-5p/6885-5p        | 1 |
| <i>circFER</i> | miR-346                   | 2 |
| <i>circFER</i> | miR-3529-3p               | 1 |
| <i>circFER</i> | miR-3607-5p               | 2 |
| <i>circFER</i> | miR-3614-3p               | 1 |
| <i>circFER</i> | miR-3619-3p               | 1 |
| <i>circFER</i> | miR-3650                  | 1 |
| <i>circFER</i> | miR-3653-5p               | 1 |
| <i>circFER</i> | miR-3654                  | 1 |
| <i>circFER</i> | miR-3657                  | 2 |
| <i>circFER</i> | miR-3663-3p               | 1 |
| <i>circFER</i> | miR-3675-5p               | 1 |
| <i>circFER</i> | miR-3679-3p               | 1 |
| <i>circFER</i> | miR-3683                  | 1 |
| <i>circFER</i> | miR-3690                  | 1 |
| <i>circFER</i> | miR-370-3p                | 1 |
| <i>circFER</i> | miR-3713                  | 1 |
| <i>circFER</i> | miR-377-3p                | 1 |
| <i>circFER</i> | miR-378-3p                | 1 |
| <i>circFER</i> | miR-378g                  | 1 |
| <i>circFER</i> | miR-380-5p/563            | 1 |
| <i>circFER</i> | miR-381-3p                | 1 |
| <i>circFER</i> | miR-3911                  | 1 |
| <i>circFER</i> | miR-3914                  | 1 |
| <i>circFER</i> | miR-3925-5p               | 1 |
| <i>circFER</i> | miR-3934-5p               | 1 |
| <i>circFER</i> | miR-3936                  | 1 |
| <i>circFER</i> | miR-3937                  | 1 |
| <i>circFER</i> | miR-3940-5p/4507          | 1 |
| <i>circFER</i> | miR-3943                  | 1 |
| <i>circFER</i> | miR-3977                  | 1 |
| <i>circFER</i> | miR-4252                  | 1 |
| <i>circFER</i> | miR-4254                  | 1 |
| <i>circFER</i> | miR-4258                  | 1 |
| <i>circFER</i> | miR-4263                  | 1 |
| <i>circFER</i> | miR-4265/4296/4322        | 1 |



|                |                                    |   |
|----------------|------------------------------------|---|
| <i>circFER</i> | miR-4268                           | 1 |
| <i>circFER</i> | miR-4274                           | 2 |
| <i>circFER</i> | miR-4275                           | 1 |
| <i>circFER</i> | miR-4292/6791-5p                   | 1 |
| <i>circFER</i> | miR-4293                           | 2 |
| <i>circFER</i> | miR-4299                           | 1 |
| <i>circFER</i> | miR-4308                           | 1 |
| <i>circFER</i> | miR-4311                           | 3 |
| <i>circFER</i> | miR-4312                           | 1 |
| <i>circFER</i> | miR-4316                           | 1 |
| <i>circFER</i> | miR-4318                           | 2 |
| <i>circFER</i> | miR-4323                           | 1 |
| <i>circFER</i> | miR-4325                           | 1 |
| <i>circFER</i> | miR-4328                           | 1 |
| <i>circFER</i> | miR-4419a/4510/6127/6129/6130/6133 | 1 |
| <i>circFER</i> | miR-4423-3p                        | 1 |
| <i>circFER</i> | miR-4423-5p                        | 1 |
| <i>circFER</i> | miR-4433b-5p                       | 1 |
| <i>circFER</i> | miR-4434/4516/5703                 | 1 |
| <i>circFER</i> | miR-4440                           | 1 |
| <i>circFER</i> | miR-4443                           | 1 |
| <i>circFER</i> | miR-4448                           | 1 |
| <i>circFER</i> | miR-4453/4538                      | 1 |
| <i>circFER</i> | miR-4456                           | 1 |
| <i>circFER</i> | miR-4461                           | 1 |
| <i>circFER</i> | miR-4468                           | 1 |
| <i>circFER</i> | miR-4470                           | 1 |
| <i>circFER</i> | miR-4475                           | 1 |
| <i>circFER</i> | miR-4477b                          | 2 |
| <i>circFER</i> | miR-4486                           | 1 |
| <i>circFER</i> | miR-4496                           | 1 |
| <i>circFER</i> | miR-4501                           | 1 |
| <i>circFER</i> | miR-4506                           | 1 |
| <i>circFER</i> | miR-4515                           | 1 |
| <i>circFER</i> | miR-4519                           | 2 |
| <i>circFER</i> | miR-452-3p                         | 1 |
| <i>circFER</i> | miR-452-5p/892-3p                  | 1 |
| <i>circFER</i> | miR-4535                           | 1 |

|                |                          |   |
|----------------|--------------------------|---|
| <i>circFER</i> | miR-4536-5p              | 1 |
| <i>circFER</i> | miR-4635                 | 2 |
| <i>circFER</i> | miR-4637                 | 1 |
| <i>circFER</i> | miR-4638-3p              | 1 |
| <i>circFER</i> | miR-4650-5p              | 1 |
| <i>circFER</i> | miR-4661-5p              | 2 |
| <i>circFER</i> | miR-4662-5p              | 1 |
| <i>circFER</i> | miR-4663                 | 1 |
| <i>circFER</i> | miR-4666a-3p             | 1 |
| <i>circFER</i> | miR-4667-5p/4700-5p/8089 | 1 |
| <i>circFER</i> | miR-4668-3p              | 1 |
| <i>circFER</i> | miR-4668-5p              | 1 |
| <i>circFER</i> | miR-4669                 | 2 |
| <i>circFER</i> | miR-4670-5p              | 1 |
| <i>circFER</i> | miR-4674                 | 1 |
| <i>circFER</i> | miR-4680-5p              | 2 |
| <i>circFER</i> | miR-4691-3p              | 1 |
| <i>circFER</i> | miR-4695-5p              | 1 |
| <i>circFER</i> | miR-4697-3p              | 1 |
| <i>circFER</i> | miR-4707-3p              | 1 |
| <i>circFER</i> | miR-4708-5p              | 2 |
| <i>circFER</i> | miR-4710                 | 1 |
| <i>circFER</i> | miR-4711-3p              | 1 |
| <i>circFER</i> | miR-4714-3p              | 2 |
| <i>circFER</i> | miR-4716-3p/6794-5p      | 1 |
| <i>circFER</i> | miR-4722-3p/6727-3p      | 1 |
| <i>circFER</i> | miR-4725-5p              | 1 |
| <i>circFER</i> | miR-4728-3p              | 1 |
| <i>circFER</i> | miR-4736                 | 1 |
| <i>circFER</i> | miR-4738-3p              | 1 |
| <i>circFER</i> | miR-4740-5p              | 1 |
| <i>circFER</i> | miR-4757-5p/6744-3p      | 1 |
| <i>circFER</i> | miR-4758-3p              | 1 |
| <i>circFER</i> | miR-4761-5p              | 2 |
| <i>circFER</i> | miR-4762-5p              | 1 |
| <i>circFER</i> | miR-4773                 | 1 |
| <i>circFER</i> | miR-4776-5p              | 1 |
| <i>circFER</i> | miR-4779                 | 1 |

|                |                                                                   |   |
|----------------|-------------------------------------------------------------------|---|
| <i>circFER</i> | miR-4790-3p                                                       | 1 |
| <i>circFER</i> | miR-4792                                                          | 1 |
| <i>circFER</i> | miR-4793-5p                                                       | 1 |
| <i>circFER</i> | miR-4796-5p                                                       | 1 |
| <i>circFER</i> | miR-4799-5p                                                       | 1 |
| <i>circFER</i> | miR-486-3p                                                        | 1 |
| <i>circFER</i> | miR-490-3p                                                        | 1 |
| <i>circFER</i> | miR-490-5p                                                        | 1 |
| <i>circFER</i> | miR-493-3p                                                        | 1 |
| <i>circFER</i> | miR-494-3p                                                        | 1 |
| <i>circFER</i> | miR-495-3p                                                        | 1 |
| <i>circFER</i> | miR-498                                                           | 5 |
| <i>circFER</i> | miR-499a-3p/499b-3p                                               | 2 |
| <i>circFER</i> | miR-5000-5p                                                       | 2 |
| <i>circFER</i> | miR-5002-3p                                                       | 1 |
| <i>circFER</i> | miR-5003-3p                                                       | 1 |
| <i>circFER</i> | miR-5006-5p                                                       | 1 |
| <i>circFER</i> | miR-500a-5p                                                       | 1 |
| <i>circFER</i> | miR-501-3p/502-3p                                                 | 1 |
| <i>circFER</i> | miR-504-3p                                                        | 1 |
| <i>circFER</i> | miR-5093                                                          | 1 |
| <i>circFER</i> | miR-5094                                                          | 1 |
| <i>circFER</i> | miR-5096                                                          | 1 |
| <i>circFER</i> | miR-511-3p                                                        | 1 |
| <i>circFER</i> | miR-512-5p                                                        | 1 |
| <i>circFER</i> | miR-516a-3p/516b-3p/7162-5p                                       | 1 |
| <i>circFER</i> | miR-516a-5p                                                       | 1 |
| <i>circFER</i> | miR-517-3p                                                        | 2 |
| <i>circFER</i> | miR-5196-3p                                                       | 1 |
| <i>circFER</i> | miR-5197-5p                                                       | 2 |
| <i>circFER</i> | miR-521                                                           | 1 |
| <i>circFER</i> | miR-539-5p                                                        | 2 |
| <i>circFER</i> | miR-548ac/548bb-3p/548d-3p/548h-3p/548z                           | 1 |
| <i>circFER</i> | miR-548aj-5p/548f-5p/548g-5p/548x-5p                              | 3 |
| <i>circFER</i> | miR-548aq-3p/548am-3p/548aj-3p/548ah1-3p/548ae-3p/548j-3p/548x-3p | 3 |
| <i>circFER</i> | miR-548av-3p                                                      | 3 |
| <i>circFER</i> | miR-548az-3p/548ar-3p/548a-3p/548e-3p/548f-3p                     | 2 |
| <i>circFER</i> | miR-548m                                                          | 1 |

|                |                                      |   |
|----------------|--------------------------------------|---|
| <i>circFER</i> | miR-548p                             | 1 |
| <i>circFER</i> | miR-548q                             | 1 |
| <i>circFER</i> | miR-548u/7161-5p                     | 1 |
| <i>circFER</i> | miR-551-3p                           | 2 |
| <i>circFER</i> | miR-551b-5p                          | 1 |
| <i>circFER</i> | miR-556-5p                           | 1 |
| <i>circFER</i> | miR-5582-3p                          | 2 |
| <i>circFER</i> | miR-5585-3p                          | 1 |
| <i>circFER</i> | miR-5586-5p                          | 1 |
| <i>circFER</i> | miR-5591-3p                          | 1 |
| <i>circFER</i> | miR-561-5p                           | 2 |
| <i>circFER</i> | miR-5681b                            | 1 |
| <i>circFER</i> | miR-569                              | 1 |
| <i>circFER</i> | miR-5697                             | 1 |
| <i>circFER</i> | miR-5699-5p                          | 1 |
| <i>circFER</i> | miR-5700                             | 1 |
| <i>circFER</i> | miR-5702                             | 1 |
| <i>circFER</i> | miR-575/4676-5p                      | 1 |
| <i>circFER</i> | miR-576-5p                           | 1 |
| <i>circFER</i> | miR-577                              | 1 |
| <i>circFER</i> | miR-582-5p                           | 2 |
| <i>circFER</i> | miR-583                              | 3 |
| <i>circFER</i> | miR-584-5p                           | 1 |
| <i>circFER</i> | miR-585-3p                           | 1 |
| <i>circFER</i> | miR-593-3p                           | 1 |
| <i>circFER</i> | miR-596                              | 2 |
| <i>circFER</i> | miR-597-5p                           | 1 |
| <i>circFER</i> | miR-604                              | 1 |
| <i>circFER</i> | miR-605-5p                           | 1 |
| <i>circFER</i> | miR-6068                             | 1 |
| <i>circFER</i> | miR-6081                             | 1 |
| <i>circFER</i> | miR-612/1285-3p/3187-5p/5189-5p/6860 | 1 |
| <i>circFER</i> | miR-6131                             | 2 |
| <i>circFER</i> | miR-6134                             | 1 |
| <i>circFER</i> | miR-619-3p                           | 3 |
| <i>circFER</i> | miR-622                              | 1 |
| <i>circFER</i> | miR-624-3p                           | 1 |
| <i>circFER</i> | miR-627-3p                           | 1 |

|                |                             |   |
|----------------|-----------------------------|---|
| <i>circFER</i> | miR-627-5p                  | 1 |
| <i>circFER</i> | miR-632/4288                | 2 |
| <i>circFER</i> | miR-634                     | 2 |
| <i>circFER</i> | miR-637                     | 1 |
| <i>circFER</i> | miR-641/3617-5p             | 1 |
| <i>circFER</i> | miR-644a                    | 1 |
| <i>circFER</i> | miR-649                     | 1 |
| <i>circFER</i> | miR-6501-5p                 | 1 |
| <i>circFER</i> | miR-6504-3p                 | 1 |
| <i>circFER</i> | miR-6511-3p                 | 1 |
| <i>circFER</i> | miR-6513-3p                 | 1 |
| <i>circFER</i> | miR-6515-5p                 | 1 |
| <i>circFER</i> | miR-6516-3p                 | 2 |
| <i>circFER</i> | miR-652-3p                  | 1 |
| <i>circFER</i> | miR-656-5p                  | 2 |
| <i>circFER</i> | miR-660-5p                  | 1 |
| <i>circFER</i> | miR-661                     | 1 |
| <i>circFER</i> | miR-662                     | 1 |
| <i>circFER</i> | miR-664b-5p                 | 1 |
| <i>circFER</i> | miR-671-5p                  | 1 |
| <i>circFER</i> | miR-6721-5p                 | 1 |
| <i>circFER</i> | miR-6731-5p/8085            | 1 |
| <i>circFER</i> | miR-6732-5p                 | 1 |
| <i>circFER</i> | miR-6742-3p                 | 2 |
| <i>circFER</i> | miR-6747-3p                 | 1 |
| <i>circFER</i> | miR-6748-5p                 | 1 |
| <i>circFER</i> | miR-6752-5p/6842-5p/7110-5p | 1 |
| <i>circFER</i> | miR-6759-3p                 | 1 |
| <i>circFER</i> | miR-6759-5p                 | 1 |
| <i>circFER</i> | miR-6762-3p                 | 1 |
| <i>circFER</i> | miR-6763-3p                 | 1 |
| <i>circFER</i> | miR-6769a-3p                | 1 |
| <i>circFER</i> | miR-6773-3p                 | 1 |
| <i>circFER</i> | miR-6776-5p                 | 2 |
| <i>circFER</i> | miR-6784-3p/6862-3p         | 1 |
| <i>circFER</i> | miR-6787-3p                 | 2 |
| <i>circFER</i> | miR-6793-5p                 | 1 |
| <i>circFER</i> | miR-6795-3p                 | 1 |

|                |                     |   |
|----------------|---------------------|---|
| <i>circFER</i> | miR-6795-5p/6887-5p | 1 |
| <i>circFER</i> | miR-6796-5p         | 1 |
| <i>circFER</i> | miR-6805-5p         | 1 |
| <i>circFER</i> | miR-6807-5p         | 1 |
| <i>circFER</i> | miR-6810-5p         | 1 |
| <i>circFER</i> | miR-6813-3p         | 1 |
| <i>circFER</i> | miR-6815-5p/6865-5p | 1 |
| <i>circFER</i> | miR-6821-5p         | 1 |
| <i>circFER</i> | miR-6825-3p         | 1 |
| <i>circFER</i> | miR-6825-5p         | 1 |
| <i>circFER</i> | miR-6826-3p         | 1 |
| <i>circFER</i> | miR-6828-5p         | 1 |
| <i>circFER</i> | miR-6835-5p         | 1 |
| <i>circFER</i> | miR-6839-3p         | 1 |
| <i>circFER</i> | miR-6847-3p         | 1 |
| <i>circFER</i> | miR-6852-5p         | 2 |
| <i>circFER</i> | miR-6853-3p         | 1 |
| <i>circFER</i> | miR-6857-5p         | 1 |
| <i>circFER</i> | miR-6858-3p         | 1 |
| <i>circFER</i> | miR-6861-5p         | 2 |
| <i>circFER</i> | miR-6868-3p         | 2 |
| <i>circFER</i> | miR-6871-3p         | 1 |
| <i>circFER</i> | miR-6872-3p         | 1 |
| <i>circFER</i> | miR-6878-5p         | 1 |
| <i>circFER</i> | miR-6880-5p         | 1 |
| <i>circFER</i> | miR-6887-3p         | 1 |
| <i>circFER</i> | miR-6890-5p         | 1 |
| <i>circFER</i> | miR-6892-3p         | 1 |
| <i>circFER</i> | miR-6892-5p         | 1 |
| <i>circFER</i> | miR-6894-5p         | 1 |
| <i>circFER</i> | miR-6895-3p         | 1 |
| <i>circFER</i> | miR-7-3p            | 1 |
| <i>circFER</i> | miR-708-3p          | 1 |
| <i>circFER</i> | miR-7106-3p         | 1 |
| <i>circFER</i> | miR-7108-3p         | 1 |
| <i>circFER</i> | miR-7109-3p         | 1 |
| <i>circFER</i> | miR-7154-3p         | 1 |
| <i>circFER</i> | miR-7155-5p         | 1 |

|                 |                    |   |
|-----------------|--------------------|---|
| <i>circFER</i>  | miR-7158-3p        | 2 |
| <i>circFER</i>  | miR-7160-5p        | 1 |
| <i>circFER</i>  | miR-758-3p         | 1 |
| <i>circFER</i>  | miR-758-5p         | 1 |
| <i>circFER</i>  | miR-765            | 1 |
| <i>circFER</i>  | miR-766-5p         | 1 |
| <i>circFER</i>  | miR-7703           | 1 |
| <i>circFER</i>  | miR-7843-3p        | 1 |
| <i>circFER</i>  | miR-7844-5p        | 1 |
| <i>circFER</i>  | miR-7847-3p        | 1 |
| <i>circFER</i>  | miR-7849-3p        | 1 |
| <i>circFER</i>  | miR-7851-3p        | 3 |
| <i>circFER</i>  | miR-7854-3p        | 1 |
| <i>circFER</i>  | miR-7973           | 1 |
| <i>circFER</i>  | miR-7978           | 1 |
| <i>circFER</i>  | miR-8057           | 1 |
| <i>circFER</i>  | miR-8060           | 1 |
| <i>circFER</i>  | miR-8069           | 1 |
| <i>circFER</i>  | miR-8071           | 1 |
| <i>circFER</i>  | miR-8077           | 1 |
| <i>circFER</i>  | miR-875-3p         | 1 |
| <i>circFER</i>  | miR-876-3p         | 1 |
| <i>circFER</i>  | miR-888-5p         | 1 |
| <i>circFER</i>  | miR-889-5p         | 1 |
| <i>circFER</i>  | miR-892a           | 2 |
| <i>circFER</i>  | miR-933            | 1 |
| <i>circFER</i>  | miR-937-5p         | 1 |
| <i>circFER</i>  | miR-939-3p         | 2 |
| <i>circFER</i>  | miR-939-5p/1343-5p | 1 |
| <i>circFMN1</i> | miR-1197           | 1 |
| <i>circFMN1</i> | miR-1224-5p        | 1 |
| <i>circFMN1</i> | miR-1226-5p        | 3 |
| <i>circFMN1</i> | miR-1245b-3p       | 2 |
| <i>circFMN1</i> | miR-1246           | 3 |
| <i>circFMN1</i> | miR-1250-3p        | 2 |
| <i>circFMN1</i> | miR-1252-5p        | 4 |
| <i>circFMN1</i> | miR-126-5p         | 2 |
| <i>circFMN1</i> | miR-1261           | 3 |

|                 |                          |   |
|-----------------|--------------------------|---|
| <i>circFMN1</i> | miR-1262/4701-3p/6736-5p | 1 |
| <i>circFMN1</i> | miR-1263                 | 1 |
| <i>circFMN1</i> | miR-1265                 | 5 |
| <i>circFMN1</i> | miR-1267                 | 2 |
| <i>circFMN1</i> | miR-1269                 | 3 |
| <i>circFMN1</i> | miR-1276                 | 3 |
| <i>circFMN1</i> | miR-128-3p               | 1 |
| <i>circFMN1</i> | miR-1287-5p              | 2 |
| <i>circFMN1</i> | miR-1288-5p              | 1 |
| <i>circFMN1</i> | miR-1289                 | 4 |
| <i>circFMN1</i> | miR-129-5p               | 2 |
| <i>circFMN1</i> | miR-1290                 | 3 |
| <i>circFMN1</i> | miR-1298-3p              | 1 |
| <i>circFMN1</i> | miR-1299                 | 5 |
| <i>circFMN1</i> | miR-130-3p/301-3p/454-3p | 2 |
| <i>circFMN1</i> | miR-1302/4298            | 4 |
| <i>circFMN1</i> | miR-1303                 | 2 |
| <i>circFMN1</i> | miR-1304-5p              | 1 |
| <i>circFMN1</i> | miR-1305                 | 1 |
| <i>circFMN1</i> | miR-140-3p.1             | 6 |
| <i>circFMN1</i> | miR-140-3p.2             | 5 |
| <i>circFMN1</i> | miR-141-5p               | 1 |
| <i>circFMN1</i> | miR-148-3p/152-3p        | 1 |
| <i>circFMN1</i> | miR-148a-5p              | 2 |
| <i>circFMN1</i> | miR-148b-5p/6874-3p      | 2 |
| <i>circFMN1</i> | miR-150-3p               | 1 |
| <i>circFMN1</i> | miR-150-5p               | 2 |
| <i>circFMN1</i> | miR-153-3p               | 1 |
| <i>circFMN1</i> | miR-1539                 | 1 |
| <i>circFMN1</i> | miR-1825                 | 2 |
| <i>circFMN1</i> | miR-1827                 | 2 |
| <i>circFMN1</i> | miR-186-5p               | 6 |
| <i>circFMN1</i> | miR-18a-3p               | 3 |
| <i>circFMN1</i> | miR-19-3p                | 1 |
| <i>circFMN1</i> | miR-19-5p                | 1 |
| <i>circFMN1</i> | miR-1909-3p/6722-3p      | 6 |
| <i>circFMN1</i> | miR-1911-5p              | 2 |
| <i>circFMN1</i> | miR-1915-5p              | 2 |



|                 |                                     |   |
|-----------------|-------------------------------------|---|
| <i>circFMN1</i> | miR-196-5p                          | 1 |
| <i>circFMN1</i> | miR-196a-3p                         | 2 |
| <i>circFMN1</i> | miR-196b-3p                         | 4 |
| <i>circFMN1</i> | miR-197-3p                          | 1 |
| <i>circFMN1</i> | miR-199-5p                          | 2 |
| <i>circFMN1</i> | miR-202-5p                          | 1 |
| <i>circFMN1</i> | miR-2052                            | 1 |
| <i>circFMN1</i> | miR-2053                            | 2 |
| <i>circFMN1</i> | miR-21-5p/590-5p                    | 3 |
| <i>circFMN1</i> | miR-211-3p                          | 1 |
| <i>circFMN1</i> | miR-2114-5p                         | 2 |
| <i>circFMN1</i> | miR-2116-3p                         | 2 |
| <i>circFMN1</i> | miR-2116-5p                         | 1 |
| <i>circFMN1</i> | miR-212-5p                          | 1 |
| <i>circFMN1</i> | miR-219-5p                          | 2 |
| <i>circFMN1</i> | miR-219b-5p                         | 3 |
| <i>circFMN1</i> | miR-22-5p                           | 1 |
| <i>circFMN1</i> | miR-224-5p                          | 7 |
| <i>circFMN1</i> | miR-2277-3p                         | 4 |
| <i>circFMN1</i> | miR-2278                            | 2 |
| <i>circFMN1</i> | miR-23-3p                           | 1 |
| <i>circFMN1</i> | miR-2355-5p                         | 1 |
| <i>circFMN1</i> | miR-25-3p/32-5p/92-3p/363-3p/367-3p | 2 |
| <i>circFMN1</i> | miR-26-5p                           | 3 |
| <i>circFMN1</i> | miR-2681-5p                         | 1 |
| <i>circFMN1</i> | miR-27-3p                           | 1 |
| <i>circFMN1</i> | miR-28-3p                           | 3 |
| <i>circFMN1</i> | miR-29b-1-5p                        | 2 |
| <i>circFMN1</i> | miR-302b-5p/302d-5p                 | 2 |
| <i>circFMN1</i> | miR-302c-5p                         | 2 |
| <i>circFMN1</i> | miR-3064-3p                         | 1 |
| <i>circFMN1</i> | miR-3074-3p                         | 1 |
| <i>circFMN1</i> | miR-31-5p                           | 1 |
| <i>circFMN1</i> | miR-3117-3p                         | 3 |
| <i>circFMN1</i> | miR-3119                            | 3 |
| <i>circFMN1</i> | miR-3120-5p                         | 3 |
| <i>circFMN1</i> | miR-3121-3p                         | 3 |
| <i>circFMN1</i> | miR-3122/3913-5p                    | 1 |

|                 |                       |   |
|-----------------|-----------------------|---|
| <i>circFMN1</i> | miR-3125/3916/6859-5p | 4 |
| <i>circFMN1</i> | miR-3126-3p           | 1 |
| <i>circFMN1</i> | miR-3127-3p/6756-3p   | 4 |
| <i>circFMN1</i> | miR-3130-3p           | 3 |
| <i>circFMN1</i> | miR-3133              | 6 |
| <i>circFMN1</i> | miR-3134              | 3 |
| <i>circFMN1</i> | miR-3135b             | 2 |
| <i>circFMN1</i> | miR-3138              | 1 |
| <i>circFMN1</i> | miR-3140-3p           | 4 |
| <i>circFMN1</i> | miR-3144-5p           | 4 |
| <i>circFMN1</i> | miR-3145-3p           | 4 |
| <i>circFMN1</i> | miR-3150b-3p          | 4 |
| <i>circFMN1</i> | miR-3154              | 8 |
| <i>circFMN1</i> | miR-3159              | 2 |
| <i>circFMN1</i> | miR-3160-5p           | 2 |
| <i>circFMN1</i> | miR-3163              | 2 |
| <i>circFMN1</i> | miR-3165              | 1 |
| <i>circFMN1</i> | miR-3168              | 2 |
| <i>circFMN1</i> | miR-3169              | 6 |
| <i>circFMN1</i> | miR-3173-3p/6891-5p   | 3 |
| <i>circFMN1</i> | miR-3174              | 2 |
| <i>circFMN1</i> | miR-3176/3922-3p      | 2 |
| <i>circFMN1</i> | miR-3179              | 6 |
| <i>circFMN1</i> | miR-3180-5p           | 4 |
| <i>circFMN1</i> | miR-3185              | 7 |
| <i>circFMN1</i> | miR-3189-3p           | 1 |
| <i>circFMN1</i> | miR-3190-5p           | 2 |
| <i>circFMN1</i> | miR-3191-3p           | 4 |
| <i>circFMN1</i> | miR-3191-5p           | 9 |
| <i>circFMN1</i> | miR-3198/4309         | 4 |
| <i>circFMN1</i> | miR-3201/4791         | 6 |
| <i>circFMN1</i> | miR-3202              | 1 |
| <i>circFMN1</i> | miR-320e              | 3 |
| <i>circFMN1</i> | miR-323a-5p           | 4 |
| <i>circFMN1</i> | miR-324-3p/1913       | 3 |
| <i>circFMN1</i> | miR-326               | 5 |
| <i>circFMN1</i> | miR-33-5p             | 3 |
| <i>circFMN1</i> | miR-335-3p            | 4 |

|                 |                           |   |
|-----------------|---------------------------|---|
| <i>circFMN1</i> | miR-3529-3p               | 2 |
| <i>circFMN1</i> | miR-3605-3p               | 1 |
| <i>circFMN1</i> | miR-3613-3p               | 2 |
| <i>circFMN1</i> | miR-3614-3p               | 1 |
| <i>circFMN1</i> | miR-3614-5p               | 1 |
| <i>circFMN1</i> | miR-3650                  | 1 |
| <i>circFMN1</i> | miR-3659                  | 2 |
| <i>circFMN1</i> | miR-3667-5p               | 3 |
| <i>circFMN1</i> | miR-367-5p                | 2 |
| <i>circFMN1</i> | miR-3675-3p               | 3 |
| <i>circFMN1</i> | miR-3679-3p               | 1 |
| <i>circFMN1</i> | miR-3685                  | 1 |
| <i>circFMN1</i> | miR-369-3p                | 2 |
| <i>circFMN1</i> | miR-3691-3p               | 2 |
| <i>circFMN1</i> | miR-371-5p                | 4 |
| <i>circFMN1</i> | miR-371b-5p/373-5p/616-5p | 4 |
| <i>circFMN1</i> | miR-372-5p                | 4 |
| <i>circFMN1</i> | miR-375                   | 4 |
| <i>circFMN1</i> | miR-376b-5p/376c-5p       | 3 |
| <i>circFMN1</i> | miR-379-5p                | 1 |
| <i>circFMN1</i> | miR-383-5p.1              | 1 |
| <i>circFMN1</i> | miR-383-5p.2              | 2 |
| <i>circFMN1</i> | miR-384                   | 1 |
| <i>circFMN1</i> | miR-3915                  | 1 |
| <i>circFMN1</i> | miR-3919                  | 5 |
| <i>circFMN1</i> | miR-3925-3p               | 1 |
| <i>circFMN1</i> | miR-3927-3p/6831-5p       | 1 |
| <i>circFMN1</i> | miR-3928-3p               | 3 |
| <i>circFMN1</i> | miR-3928-5p/6806-3p       | 4 |
| <i>circFMN1</i> | miR-3941                  | 1 |
| <i>circFMN1</i> | miR-3942-3p               | 2 |
| <i>circFMN1</i> | miR-3944-5p               | 8 |
| <i>circFMN1</i> | miR-3978                  | 4 |
| <i>circFMN1</i> | miR-409-5p                | 1 |
| <i>circFMN1</i> | miR-421                   | 2 |
| <i>circFMN1</i> | miR-424-3p                | 2 |
| <i>circFMN1</i> | miR-4255                  | 2 |
| <i>circFMN1</i> | miR-4271/4725-3p/6780b-5p | 2 |

|                 |                                              |   |
|-----------------|----------------------------------------------|---|
| <i>circFMN1</i> | miR-4294                                     | 4 |
| <i>circFMN1</i> | miR-4299                                     | 2 |
| <i>circFMN1</i> | miR-4301                                     | 2 |
| <i>circFMN1</i> | miR-4303                                     | 5 |
| <i>circFMN1</i> | miR-4307                                     | 1 |
| <i>circFMN1</i> | miR-4311                                     | 3 |
| <i>circFMN1</i> | miR-4314                                     | 2 |
| <i>circFMN1</i> | miR-4317                                     | 2 |
| <i>circFMN1</i> | miR-432-5p                                   | 2 |
| <i>circFMN1</i> | miR-433-5p                                   | 2 |
| <i>circFMN1</i> | miR-4424                                     | 1 |
| <i>circFMN1</i> | miR-4427                                     | 1 |
| <i>circFMN1</i> | miR-4428                                     | 3 |
| <i>circFMN1</i> | miR-4433b-3p                                 | 4 |
| <i>circFMN1</i> | miR-4436b-3p/4632-5p/6735-5p/6879-5p/7843-5p | 3 |
| <i>circFMN1</i> | miR-4443                                     | 3 |
| <i>circFMN1</i> | miR-4445-5p                                  | 2 |
| <i>circFMN1</i> | miR-4446-5p                                  | 1 |
| <i>circFMN1</i> | miR-4451                                     | 1 |
| <i>circFMN1</i> | miR-4456                                     | 2 |
| <i>circFMN1</i> | miR-4461                                     | 1 |
| <i>circFMN1</i> | miR-448                                      | 1 |
| <i>circFMN1</i> | miR-4496                                     | 3 |
| <i>circFMN1</i> | miR-4506                                     | 1 |
| <i>circFMN1</i> | miR-450a-1-3p                                | 1 |
| <i>circFMN1</i> | miR-450b-3p/769-3p                           | 1 |
| <i>circFMN1</i> | miR-452-3p                                   | 4 |
| <i>circFMN1</i> | miR-452-5p/892-3p                            | 1 |
| <i>circFMN1</i> | miR-4520-5p                                  | 1 |
| <i>circFMN1</i> | miR-4524a-3p                                 | 8 |
| <i>circFMN1</i> | miR-4528                                     | 2 |
| <i>circFMN1</i> | miR-4533                                     | 1 |
| <i>circFMN1</i> | miR-4534/8082                                | 3 |
| <i>circFMN1</i> | miR-4539                                     | 2 |
| <i>circFMN1</i> | miR-4639-5p                                  | 1 |
| <i>circFMN1</i> | miR-4649-3p                                  | 3 |
| <i>circFMN1</i> | miR-4650-3p                                  | 1 |
| <i>circFMN1</i> | miR-4652-3p                                  | 1 |

|                 |                       |   |
|-----------------|-----------------------|---|
| <i>circFMN1</i> | miR-4652-5p           | 4 |
| <i>circFMN1</i> | miR-4653-3p           | 2 |
| <i>circFMN1</i> | miR-4659a-3p/4659b-3p | 1 |
| <i>circFMN1</i> | miR-4659a-5p/4659b-5p | 3 |
| <i>circFMN1</i> | miR-4666a-5p          | 1 |
| <i>circFMN1</i> | miR-4672              | 1 |
| <i>circFMN1</i> | miR-4680-3p           | 1 |
| <i>circFMN1</i> | miR-4684-5p           | 2 |
| <i>circFMN1</i> | miR-4686              | 2 |
| <i>circFMN1</i> | miR-4689/6858-5p      | 1 |
| <i>circFMN1</i> | miR-4691-5p/6792-3p   | 2 |
| <i>circFMN1</i> | miR-4694-5p           | 2 |
| <i>circFMN1</i> | miR-4700-3p           | 4 |
| <i>circFMN1</i> | miR-4708-3p           | 1 |
| <i>circFMN1</i> | miR-4709-3p           | 7 |
| <i>circFMN1</i> | miR-4716-5p           | 1 |
| <i>circFMN1</i> | miR-4724-3p           | 2 |
| <i>circFMN1</i> | miR-4724-5p           | 4 |
| <i>circFMN1</i> | miR-4727-5p           | 5 |
| <i>circFMN1</i> | miR-4729              | 4 |
| <i>circFMN1</i> | miR-4732-5p           | 1 |
| <i>circFMN1</i> | miR-4735-5p           | 1 |
| <i>circFMN1</i> | miR-4743-3p           | 1 |
| <i>circFMN1</i> | miR-4747-5p/5196-5p   | 4 |
| <i>circFMN1</i> | miR-4751              | 1 |
| <i>circFMN1</i> | miR-4756-3p           | 5 |
| <i>circFMN1</i> | miR-4757-5p/6744-3p   | 2 |
| <i>circFMN1</i> | miR-4759              | 6 |
| <i>circFMN1</i> | miR-4760-5p/8061      | 1 |
| <i>circFMN1</i> | miR-4761-3p           | 3 |
| <i>circFMN1</i> | miR-4762-3p           | 2 |
| <i>circFMN1</i> | miR-4764-5p           | 3 |
| <i>circFMN1</i> | miR-4769-3p/6817-5p   | 2 |
| <i>circFMN1</i> | miR-4772-5p           | 1 |
| <i>circFMN1</i> | miR-4775              | 3 |
| <i>circFMN1</i> | miR-4776-3p           | 1 |
| <i>circFMN1</i> | miR-4778-5p           | 4 |
| <i>circFMN1</i> | miR-4780              | 2 |

|                 |                     |   |
|-----------------|---------------------|---|
| <i>circFMN1</i> | miR-4782-5p/5706    | 5 |
| <i>circFMN1</i> | miR-4790-3p         | 3 |
| <i>circFMN1</i> | miR-4793-3p         | 3 |
| <i>circFMN1</i> | miR-4797-5p         | 4 |
| <i>circFMN1</i> | miR-4800-5p         | 1 |
| <i>circFMN1</i> | miR-4802-3p         | 2 |
| <i>circFMN1</i> | miR-4802-5p         | 6 |
| <i>circFMN1</i> | miR-483-5p          | 1 |
| <i>circFMN1</i> | miR-487a-5p/487b-5p | 1 |
| <i>circFMN1</i> | miR-488-5p          | 3 |
| <i>circFMN1</i> | miR-494-3p          | 1 |
| <i>circFMN1</i> | miR-496.1           | 1 |
| <i>circFMN1</i> | miR-496.2           | 1 |
| <i>circFMN1</i> | miR-497-3p          | 5 |
| <i>circFMN1</i> | miR-498             | 1 |
| <i>circFMN1</i> | miR-5000-3p         | 3 |
| <i>circFMN1</i> | miR-5000-5p         | 1 |
| <i>circFMN1</i> | miR-5001-3p         | 5 |
| <i>circFMN1</i> | miR-5002-5p         | 2 |
| <i>circFMN1</i> | miR-5004-5p         | 1 |
| <i>circFMN1</i> | miR-5009-5p/8058    | 3 |
| <i>circFMN1</i> | miR-502-5p          | 2 |
| <i>circFMN1</i> | miR-503-3p          | 3 |
| <i>circFMN1</i> | miR-505-3p.1        | 1 |
| <i>circFMN1</i> | miR-505-3p.2        | 2 |
| <i>circFMN1</i> | miR-505-5p          | 2 |
| <i>circFMN1</i> | miR-508-3p          | 2 |
| <i>circFMN1</i> | miR-5089-5p         | 1 |
| <i>circFMN1</i> | miR-5093            | 6 |
| <i>circFMN1</i> | miR-5096            | 3 |
| <i>circFMN1</i> | miR-5100            | 1 |
| <i>circFMN1</i> | miR-511-5p          | 1 |
| <i>circFMN1</i> | miR-513a-5p         | 1 |
| <i>circFMN1</i> | miR-515-5p/519e-5p  | 1 |
| <i>circFMN1</i> | miR-516b-5p         | 5 |
| <i>circFMN1</i> | miR-5187-3p         | 1 |
| <i>circFMN1</i> | miR-518c-5p         | 5 |
| <i>circFMN1</i> | miR-5193            | 3 |

|                 |                                                                  |    |
|-----------------|------------------------------------------------------------------|----|
| <i>circFMN1</i> | miR-5195-5p                                                      | 1  |
| <i>circFMN1</i> | miR-5197-3p                                                      | 11 |
| <i>circFMN1</i> | miR-520g-5p                                                      | 1  |
| <i>circFMN1</i> | miR-525-5p                                                       | 2  |
| <i>circFMN1</i> | miR-532-3p                                                       | 2  |
| <i>circFMN1</i> | miR-539-5p                                                       | 4  |
| <i>circFMN1</i> | miR-542-5p                                                       | 3  |
| <i>circFMN1</i> | miR-543                                                          | 3  |
| <i>circFMN1</i> | miR-544a                                                         | 3  |
| <i>circFMN1</i> | miR-545-3p                                                       | 2  |
| <i>circFMN1</i> | miR-548ac/548bb-3p/548d-3p/548h-3p/548z                          | 2  |
| <i>circFMN1</i> | miR-548ad-3p                                                     | 2  |
| <i>circFMN1</i> | miR-548ai/548ag/548ba/570-5p                                     | 2  |
| <i>circFMN1</i> | miR-548ao-3p                                                     | 3  |
| <i>circFMN1</i> | miR-548aq-3p/548am-3p/548aj-3p/548al-3p/548ae-3p/548j-3p/548x-3p | 6  |
| <i>circFMN1</i> | miR-548av-3p                                                     | 6  |
| <i>circFMN1</i> | miR-548az-3p/548ar-3p/548a-3p/548e-3p/548f-3p                    | 7  |
| <i>circFMN1</i> | miR-548az-5p/548t-5p                                             | 3  |
| <i>circFMN1</i> | miR-548g-3p                                                      | 2  |
| <i>circFMN1</i> | miR-548m                                                         | 1  |
| <i>circFMN1</i> | miR-548n                                                         | 3  |
| <i>circFMN1</i> | miR-548q                                                         | 2  |
| <i>circFMN1</i> | miR-556-3p                                                       | 1  |
| <i>circFMN1</i> | miR-5571-5p                                                      | 5  |
| <i>circFMN1</i> | miR-5579-3p                                                      | 3  |
| <i>circFMN1</i> | miR-5582-3p                                                      | 2  |
| <i>circFMN1</i> | miR-5584-3p                                                      | 2  |
| <i>circFMN1</i> | miR-5586-3p                                                      | 4  |
| <i>circFMN1</i> | miR-5588-3p                                                      | 2  |
| <i>circFMN1</i> | miR-5590-5p                                                      | 3  |
| <i>circFMN1</i> | miR-561-5p                                                       | 4  |
| <i>circFMN1</i> | miR-5680                                                         | 3  |
| <i>circFMN1</i> | miR-5681a                                                        | 5  |
| <i>circFMN1</i> | miR-5681b                                                        | 2  |
| <i>circFMN1</i> | miR-5683                                                         | 1  |
| <i>circFMN1</i> | miR-569                                                          | 1  |
| <i>circFMN1</i> | miR-5692bc                                                       | 2  |
| <i>circFMN1</i> | miR-5694                                                         | 2  |

|                 |                  |   |
|-----------------|------------------|---|
| <i>circFMN1</i> | miR-570-3p       | 2 |
| <i>circFMN1</i> | miR-574-5p       | 2 |
| <i>circFMN1</i> | miR-580-3p       | 6 |
| <i>circFMN1</i> | miR-583          | 3 |
| <i>circFMN1</i> | miR-584-3p       | 2 |
| <i>circFMN1</i> | miR-586          | 2 |
| <i>circFMN1</i> | miR-587          | 2 |
| <i>circFMN1</i> | miR-590-3p       | 3 |
| <i>circFMN1</i> | miR-598-5p       | 1 |
| <i>circFMN1</i> | miR-6072/6891-3p | 2 |
| <i>circFMN1</i> | miR-6083         | 5 |
| <i>circFMN1</i> | miR-6126         | 3 |
| <i>circFMN1</i> | miR-6128         | 5 |
| <i>circFMN1</i> | miR-6132/6836-5p | 6 |
| <i>circFMN1</i> | miR-627-3p       | 3 |
| <i>circFMN1</i> | miR-628-5p       | 6 |
| <i>circFMN1</i> | miR-630          | 2 |
| <i>circFMN1</i> | miR-635/6774-5p  | 1 |
| <i>circFMN1</i> | miR-642-3p       | 1 |
| <i>circFMN1</i> | miR-642b-5p      | 2 |
| <i>circFMN1</i> | miR-6500-3p      | 1 |
| <i>circFMN1</i> | miR-6503-3p      | 1 |
| <i>circFMN1</i> | miR-6507-3p      | 5 |
| <i>circFMN1</i> | miR-6508-5p/8067 | 2 |
| <i>circFMN1</i> | miR-6511-3p      | 1 |
| <i>circFMN1</i> | miR-6511-5p      | 2 |
| <i>circFMN1</i> | miR-6513-3p      | 2 |
| <i>circFMN1</i> | miR-6513-5p      | 1 |
| <i>circFMN1</i> | miR-6514-5p      | 6 |
| <i>circFMN1</i> | miR-6515-5p      | 3 |
| <i>circFMN1</i> | miR-656-3p       | 2 |
| <i>circFMN1</i> | miR-659-3p       | 1 |
| <i>circFMN1</i> | miR-660-3p       | 3 |
| <i>circFMN1</i> | miR-6715a-3p     | 5 |
| <i>circFMN1</i> | miR-6715b-3p     | 1 |
| <i>circFMN1</i> | miR-6720-5p      | 4 |
| <i>circFMN1</i> | miR-6727-5p      | 3 |
| <i>circFMN1</i> | miR-6728-5p      | 1 |



|                 |                     |   |
|-----------------|---------------------|---|
| <i>circFMN1</i> | miR-6730-5p         | 5 |
| <i>circFMN1</i> | miR-6734-5p         | 3 |
| <i>circFMN1</i> | miR-6736-3p         | 2 |
| <i>circFMN1</i> | miR-6738-3p         | 3 |
| <i>circFMN1</i> | miR-6739-3p         | 2 |
| <i>circFMN1</i> | miR-6740-5p         | 1 |
| <i>circFMN1</i> | miR-6741-5p         | 1 |
| <i>circFMN1</i> | miR-6749-3p         | 2 |
| <i>circFMN1</i> | miR-6750-3p         | 3 |
| <i>circFMN1</i> | miR-6755-5p         | 1 |
| <i>circFMN1</i> | miR-676-5p          | 2 |
| <i>circFMN1</i> | miR-6764-3p/6824-3p | 5 |
| <i>circFMN1</i> | miR-6767-3p         | 3 |
| <i>circFMN1</i> | miR-6768-5p         | 2 |
| <i>circFMN1</i> | miR-6776-3p         | 1 |
| <i>circFMN1</i> | miR-6776-5p         | 1 |
| <i>circFMN1</i> | miR-6777-5p/6889-5p | 3 |
| <i>circFMN1</i> | miR-6778-3p         | 4 |
| <i>circFMN1</i> | miR-6780b-3p        | 2 |
| <i>circFMN1</i> | miR-6782-3p         | 2 |
| <i>circFMN1</i> | miR-6783-5p         | 2 |
| <i>circFMN1</i> | miR-6784-3p/6862-3p | 1 |
| <i>circFMN1</i> | miR-6790-3p         | 2 |
| <i>circFMN1</i> | miR-6791-3p/6829-3p | 4 |
| <i>circFMN1</i> | miR-6793-3p         | 1 |
| <i>circFMN1</i> | miR-6798-5p         | 1 |
| <i>circFMN1</i> | miR-6804-5p         | 1 |
| <i>circFMN1</i> | miR-6809-5p         | 1 |
| <i>circFMN1</i> | miR-6814-5p         | 2 |
| <i>circFMN1</i> | miR-6816-3p         | 1 |
| <i>circFMN1</i> | miR-6819-3p/6877-3p | 1 |
| <i>circFMN1</i> | miR-6821-3p         | 2 |
| <i>circFMN1</i> | miR-6826-3p         | 3 |
| <i>circFMN1</i> | miR-6830-3p         | 1 |
| <i>circFMN1</i> | miR-6830-5p         | 5 |
| <i>circFMN1</i> | miR-6832-5p         | 1 |
| <i>circFMN1</i> | miR-6834-5p         | 3 |
| <i>circFMN1</i> | miR-6841-3p         | 2 |

|                 |             |   |
|-----------------|-------------|---|
| <i>circFMN1</i> | miR-6841-5p | 1 |
| <i>circFMN1</i> | miR-6846-3p | 1 |
| <i>circFMN1</i> | miR-6849-3p | 3 |
| <i>circFMN1</i> | miR-6856-3p | 5 |
| <i>circFMN1</i> | miR-6859-3p | 1 |
| <i>circFMN1</i> | miR-6861-5p | 1 |
| <i>circFMN1</i> | miR-6864-5p | 3 |
| <i>circFMN1</i> | miR-6866-5p | 1 |
| <i>circFMN1</i> | miR-6869-5p | 2 |
| <i>circFMN1</i> | miR-6870-3p | 3 |
| <i>circFMN1</i> | miR-6871-5p | 1 |
| <i>circFMN1</i> | miR-6875-3p | 1 |
| <i>circFMN1</i> | miR-6878-3p | 2 |
| <i>circFMN1</i> | miR-6880-5p | 1 |
| <i>circFMN1</i> | miR-6884-3p | 2 |
| <i>circFMN1</i> | miR-6885-3p | 5 |
| <i>circFMN1</i> | miR-6888-3p | 2 |
| <i>circFMN1</i> | miR-6894-5p | 3 |
| <i>circFMN1</i> | miR-708-3p  | 3 |
| <i>circFMN1</i> | miR-7109-3p | 1 |
| <i>circFMN1</i> | miR-7153-3p | 1 |
| <i>circFMN1</i> | miR-7154-3p | 3 |
| <i>circFMN1</i> | miR-7159-5p | 2 |
| <i>circFMN1</i> | miR-7161-3p | 1 |
| <i>circFMN1</i> | miR-7162-3p | 3 |
| <i>circFMN1</i> | miR-7515    | 6 |
| <i>circFMN1</i> | miR-7641    | 2 |
| <i>circFMN1</i> | miR-765     | 3 |
| <i>circFMN1</i> | miR-766-3p  | 1 |
| <i>circFMN1</i> | miR-766-5p  | 3 |
| <i>circFMN1</i> | miR-7705    | 3 |
| <i>circFMN1</i> | miR-7844-5p | 1 |
| <i>circFMN1</i> | miR-7850-5p | 4 |
| <i>circFMN1</i> | miR-7973    | 1 |
| <i>circFMN1</i> | miR-7978    | 2 |
| <i>circFMN1</i> | miR-8055    | 3 |
| <i>circFMN1</i> | miR-8069    | 2 |
| <i>circFMN1</i> | miR-8071    | 1 |

|                 |                     |    |
|-----------------|---------------------|----|
| <i>circFMN1</i> | miR-8080            | 1  |
| <i>circFMN1</i> | miR-8081            | 1  |
| <i>circFMN1</i> | miR-8083            | 6  |
| <i>circFMN1</i> | miR-875-3p          | 6  |
| <i>circFMN1</i> | miR-876-3p          | 4  |
| <i>circFMN1</i> | miR-876-5p          | 3  |
| <i>circFMN1</i> | miR-877-5p          | 1  |
| <i>circFMN1</i> | miR-885-5p          | 2  |
| <i>circFMN1</i> | miR-887-3p          | 2  |
| <i>circFMN1</i> | miR-887-5p          | 1  |
| <i>circFMN1</i> | miR-888-5p          | 4  |
| <i>circFMN1</i> | miR-889-3p          | 1  |
| <i>circFMN1</i> | miR-890             | 2  |
| <i>circFMN1</i> | miR-891b            | 2  |
| <i>circFMN1</i> | miR-924             | 1  |
| <i>circFMN1</i> | miR-944             | 3  |
| <i>circFMN1</i> | miR-4662a-3p        | 1  |
| <i>circFMN1</i> | miR-4699-5p         | 4  |
| <i>circFMN1</i> | miR-577             | 1  |
| <i>circFMN1</i> | miR-10-5p           | 4  |
| <i>circFMN1</i> | miR-103-3p/107      | 4  |
| <i>circFMN1</i> | miR-105-5p          | 1  |
| <i>circFMN1</i> | miR-106a-3p         | 2  |
| <i>circFMN1</i> | miR-1193            | 2  |
| <i>circFMN1</i> | miR-1224-3p         | 4  |
| <i>circFMN1</i> | miR-1229-3p         | 1  |
| <i>circFMN1</i> | miR-1233-3p         | 1  |
| <i>circFMN1</i> | miR-1236-3p         | 2  |
| <i>circFMN1</i> | miR-1238-3p         | 1  |
| <i>circFMN1</i> | miR-1238-5p/4758-5p | 1  |
| <i>circFMN1</i> | miR-124-3p.1        | 1  |
| <i>circFMN1</i> | miR-1249-5p/6797-5p | 3  |
| <i>circFMN1</i> | miR-1252-3p         | 4  |
| <i>circFMN1</i> | miR-1253            | 13 |
| <i>circFMN1</i> | miR-1256            | 2  |
| <i>circFMN1</i> | miR-1257            | 4  |
| <i>circFMN1</i> | miR-1266-5p/4518    | 2  |
| <i>circFMN1</i> | miR-127-5p          | 1  |

|                 |                                     |   |
|-----------------|-------------------------------------|---|
| <i>circFMN1</i> | miR-1272                            | 4 |
| <i>circFMN1</i> | miR-1281                            | 2 |
| <i>circFMN1</i> | miR-129-3p                          | 4 |
| <i>circFMN1</i> | miR-1301-3p                         | 1 |
| <i>circFMN1</i> | miR-1306-5p                         | 5 |
| <i>circFMN1</i> | miR-130b-5p                         | 1 |
| <i>circFMN1</i> | miR-1322                            | 4 |
| <i>circFMN1</i> | miR-1324                            | 5 |
| <i>circFMN1</i> | miR-145-5p                          | 1 |
| <i>circFMN1</i> | miR-146a-3p                         | 3 |
| <i>circFMN1</i> | miR-146b-3p                         | 5 |
| <i>circFMN1</i> | miR-1470                            | 4 |
| <i>circFMN1</i> | miR-147a                            | 2 |
| <i>circFMN1</i> | miR-147b                            | 2 |
| <i>circFMN1</i> | miR-17-5p/20-5p/93-5p/106-5p/519-3p | 1 |
| <i>circFMN1</i> | miR-181-5p                          | 1 |
| <i>circFMN1</i> | miR-181a-3p                         | 1 |
| <i>circFMN1</i> | miR-181c-3p                         | 1 |
| <i>circFMN1</i> | miR-181d-3p                         | 3 |
| <i>circFMN1</i> | miR-183-3p                          | 1 |
| <i>circFMN1</i> | miR-183-5p.1                        | 3 |
| <i>circFMN1</i> | miR-185-3p                          | 1 |
| <i>circFMN1</i> | miR-188-5p                          | 3 |
| <i>circFMN1</i> | miR-1909-5p                         | 2 |
| <i>circFMN1</i> | miR-1914-5p                         | 2 |
| <i>circFMN1</i> | miR-1915-3p/6764-5p                 | 6 |
| <i>circFMN1</i> | miR-1976                            | 3 |
| <i>circFMN1</i> | miR-198                             | 1 |
| <i>circFMN1</i> | miR-203a-3p.1                       | 4 |
| <i>circFMN1</i> | miR-203b-3p                         | 1 |
| <i>circFMN1</i> | miR-205-3p                          | 1 |
| <i>circFMN1</i> | miR-205-5p                          | 2 |
| <i>circFMN1</i> | miR-210-3p                          | 2 |
| <i>circFMN1</i> | miR-210-5p                          | 2 |
| <i>circFMN1</i> | miR-214-3p/3619-5p                  | 2 |
| <i>circFMN1</i> | miR-215-3p                          | 2 |
| <i>circFMN1</i> | miR-221-3p/222-3p                   | 1 |
| <i>circFMN1</i> | miR-2355-3p                         | 1 |

|                 |                                 |   |
|-----------------|---------------------------------|---|
| <i>circFMN1</i> | miR-2861                        | 1 |
| <i>circFMN1</i> | miR-298                         | 4 |
| <i>circFMN1</i> | miR-302-3p/372-3p/373-3p/520-3p | 1 |
| <i>circFMN1</i> | miR-302c-3p.2/520-3p            | 2 |
| <i>circFMN1</i> | miR-3065-3p                     | 2 |
| <i>circFMN1</i> | miR-3115                        | 1 |
| <i>circFMN1</i> | miR-3136-5p/4439                | 1 |
| <i>circFMN1</i> | miR-3145-5p                     | 1 |
| <i>circFMN1</i> | miR-3146                        | 1 |
| <i>circFMN1</i> | miR-3150a-5p/3150b-5p           | 1 |
| <i>circFMN1</i> | miR-3152-5p                     | 1 |
| <i>circFMN1</i> | miR-3157-3p                     | 1 |
| <i>circFMN1</i> | miR-3161                        | 3 |
| <i>circFMN1</i> | miR-3173-5p                     | 5 |
| <i>circFMN1</i> | miR-3180-3p                     | 1 |
| <i>circFMN1</i> | miR-3181                        | 1 |
| <i>circFMN1</i> | miR-3189-5p                     | 2 |
| <i>circFMN1</i> | miR-3193                        | 1 |
| <i>circFMN1</i> | miR-3194-5p                     | 2 |
| <i>circFMN1</i> | miR-3199/8052                   | 3 |
| <i>circFMN1</i> | miR-320                         | 1 |
| <i>circFMN1</i> | miR-3200-5p                     | 2 |
| <i>circFMN1</i> | miR-323b-5p/410-5p/494-5p       | 1 |
| <i>circFMN1</i> | miR-324-5p                      | 1 |
| <i>circFMN1</i> | miR-330-3p.2                    | 4 |
| <i>circFMN1</i> | miR-331-3p                      | 2 |
| <i>circFMN1</i> | miR-339-5p                      | 1 |
| <i>circFMN1</i> | miR-34a-3p                      | 1 |
| <i>circFMN1</i> | miR-361-3p                      | 6 |
| <i>circFMN1</i> | miR-3611                        | 2 |
| <i>circFMN1</i> | miR-3616-3p                     | 2 |
| <i>circFMN1</i> | miR-3617-3p                     | 1 |
| <i>circFMN1</i> | miR-3622a-3p/3622b-3p           | 4 |
| <i>circFMN1</i> | miR-3622b-5p                    | 1 |
| <i>circFMN1</i> | miR-3646                        | 4 |
| <i>circFMN1</i> | miR-3649                        | 5 |
| <i>circFMN1</i> | miR-365-3p                      | 1 |
| <i>circFMN1</i> | miR-3653-5p                     | 3 |

|                 |                     |   |
|-----------------|---------------------|---|
| <i>circFMN1</i> | miR-365a-5p/365b-5p | 3 |
| <i>circFMN1</i> | miR-3660/4526       | 4 |
| <i>circFMN1</i> | miR-3662            | 1 |
| <i>circFMN1</i> | miR-3664-3p         | 2 |
| <i>circFMN1</i> | miR-3667-3p         | 1 |
| <i>circFMN1</i> | miR-3671            | 2 |
| <i>circFMN1</i> | miR-3682-3p         | 4 |
| <i>circFMN1</i> | miR-3690            | 7 |
| <i>circFMN1</i> | miR-3692-3p         | 6 |
| <i>circFMN1</i> | miR-370-3p          | 1 |
| <i>circFMN1</i> | miR-3714            | 1 |
| <i>circFMN1</i> | miR-378-3p          | 2 |
| <i>circFMN1</i> | miR-378g            | 2 |
| <i>circFMN1</i> | miR-381-3p          | 1 |
| <i>circFMN1</i> | miR-381-5p          | 1 |
| <i>circFMN1</i> | miR-383-3p          | 2 |
| <i>circFMN1</i> | miR-3909            | 1 |
| <i>circFMN1</i> | miR-3910            | 1 |
| <i>circFMN1</i> | miR-3913-3p         | 2 |
| <i>circFMN1</i> | miR-3944-3p         | 1 |
| <i>circFMN1</i> | miR-3945            | 3 |
| <i>circFMN1</i> | miR-3974            | 1 |
| <i>circFMN1</i> | miR-423-5p          | 1 |
| <i>circFMN1</i> | miR-425-3p          | 1 |
| <i>circFMN1</i> | miR-4253/6862-5p    | 3 |
| <i>circFMN1</i> | miR-4254            | 7 |
| <i>circFMN1</i> | miR-4267            | 2 |
| <i>circFMN1</i> | miR-4275            | 1 |
| <i>circFMN1</i> | miR-4279            | 5 |
| <i>circFMN1</i> | miR-4286            | 5 |
| <i>circFMN1</i> | miR-4290            | 1 |
| <i>circFMN1</i> | miR-4291            | 2 |
| <i>circFMN1</i> | miR-4292/6791-5p    | 9 |
| <i>circFMN1</i> | miR-4308            | 9 |
| <i>circFMN1</i> | miR-4328            | 1 |
| <i>circFMN1</i> | miR-4422            | 4 |
| <i>circFMN1</i> | miR-4426/4647/4662b | 4 |
| <i>circFMN1</i> | miR-4433a-5p        | 2 |

|                 |                     |   |
|-----------------|---------------------|---|
| <i>circFMN1</i> | miR-4433b-5p        | 1 |
| <i>circFMN1</i> | miR-4452            | 1 |
| <i>circFMN1</i> | miR-4485-5p         | 2 |
| <i>circFMN1</i> | miR-4486            | 2 |
| <i>circFMN1</i> | miR-4493            | 2 |
| <i>circFMN1</i> | miR-4497            | 1 |
| <i>circFMN1</i> | miR-4503            | 1 |
| <i>circFMN1</i> | miR-4508            | 1 |
| <i>circFMN1</i> | miR-4511            | 1 |
| <i>circFMN1</i> | miR-4512            | 1 |
| <i>circFMN1</i> | miR-4520-2-3p       | 2 |
| <i>circFMN1</i> | miR-4522            | 2 |
| <i>circFMN1</i> | miR-4524b-3p        | 8 |
| <i>circFMN1</i> | miR-4529-3p         | 2 |
| <i>circFMN1</i> | miR-4535            | 1 |
| <i>circFMN1</i> | miR-454-5p          | 1 |
| <i>circFMN1</i> | miR-4638-3p         | 2 |
| <i>circFMN1</i> | miR-4640-3p         | 6 |
| <i>circFMN1</i> | miR-4640-5p         | 1 |
| <i>circFMN1</i> | miR-4642            | 1 |
| <i>circFMN1</i> | miR-4646-3p         | 1 |
| <i>circFMN1</i> | miR-4649-5p/6729-5p | 1 |
| <i>circFMN1</i> | miR-4658/6790-5p    | 1 |
| <i>circFMN1</i> | miR-466             | 2 |
| <i>circFMN1</i> | miR-4666a-3p        | 1 |
| <i>circFMN1</i> | miR-4667-3p         | 4 |
| <i>circFMN1</i> | miR-4668-3p         | 1 |
| <i>circFMN1</i> | miR-4677-3p         | 3 |
| <i>circFMN1</i> | miR-4679            | 3 |
| <i>circFMN1</i> | miR-4687-5p         | 4 |
| <i>circFMN1</i> | miR-4691-3p         | 2 |
| <i>circFMN1</i> | miR-4696            | 2 |
| <i>circFMN1</i> | miR-4698            | 1 |
| <i>circFMN1</i> | miR-4704-3p         | 1 |
| <i>circFMN1</i> | miR-4709-5p         | 1 |
| <i>circFMN1</i> | miR-4711-5p         | 1 |
| <i>circFMN1</i> | miR-4712-3p         | 6 |
| <i>circFMN1</i> | miR-4713-5p         | 1 |

|                 |                     |   |
|-----------------|---------------------|---|
| <i>circFMN1</i> | miR-4714-3p         | 1 |
| <i>circFMN1</i> | miR-4715-3p         | 1 |
| <i>circFMN1</i> | miR-4716-3p/6794-5p | 2 |
| <i>circFMN1</i> | miR-4719            | 3 |
| <i>circFMN1</i> | miR-4721            | 2 |
| <i>circFMN1</i> | miR-4722-3p/6727-3p | 1 |
| <i>circFMN1</i> | miR-4726-3p         | 6 |
| <i>circFMN1</i> | miR-4731-3p/4801    | 2 |
| <i>circFMN1</i> | miR-4731-5p         | 1 |
| <i>circFMN1</i> | miR-4749-3p         | 2 |
| <i>circFMN1</i> | miR-4750-5p         | 1 |
| <i>circFMN1</i> | miR-4758-3p         | 2 |
| <i>circFMN1</i> | miR-4761-5p         | 1 |
| <i>circFMN1</i> | miR-4762-5p         | 1 |
| <i>circFMN1</i> | miR-4764-3p         | 1 |
| <i>circFMN1</i> | miR-4766-5p         | 2 |
| <i>circFMN1</i> | miR-4773            | 1 |
| <i>circFMN1</i> | miR-4774-3p         | 1 |
| <i>circFMN1</i> | miR-4776-5p         | 1 |
| <i>circFMN1</i> | miR-4777-3p         | 1 |
| <i>circFMN1</i> | miR-4778-3p         | 2 |
| <i>circFMN1</i> | miR-4786-3p         | 3 |
| <i>circFMN1</i> | miR-4786-5p         | 3 |
| <i>circFMN1</i> | miR-483-3p.1        | 1 |
| <i>circFMN1</i> | miR-483-3p.2        | 2 |
| <i>circFMN1</i> | miR-488-3p          | 4 |
| <i>circFMN1</i> | miR-489-3p          | 2 |
| <i>circFMN1</i> | miR-490-3p          | 1 |
| <i>circFMN1</i> | miR-492             | 1 |
| <i>circFMN1</i> | miR-5002-3p         | 1 |
| <i>circFMN1</i> | miR-5003-5p         | 1 |
| <i>circFMN1</i> | miR-5004-3p         | 2 |
| <i>circFMN1</i> | miR-5007-3p         | 1 |
| <i>circFMN1</i> | miR-500a-3p         | 1 |
| <i>circFMN1</i> | miR-500b-3p         | 1 |
| <i>circFMN1</i> | miR-504-5p.1        | 4 |
| <i>circFMN1</i> | miR-508-5p          | 1 |
| <i>circFMN1</i> | miR-5089-3p         | 1 |



|                 |                                      |   |
|-----------------|--------------------------------------|---|
| <i>circFMN1</i> | miR-5090/6775-5p                     | 1 |
| <i>circFMN1</i> | miR-510-3p                           | 2 |
| <i>circFMN1</i> | miR-511-3p                           | 3 |
| <i>circFMN1</i> | miR-512-3p                           | 2 |
| <i>circFMN1</i> | miR-513b-3p                          | 1 |
| <i>circFMN1</i> | miR-519-3p                           | 1 |
| <i>circFMN1</i> | miR-5190                             | 7 |
| <i>circFMN1</i> | miR-5194                             | 1 |
| <i>circFMN1</i> | miR-519d-5p                          | 3 |
| <i>circFMN1</i> | miR-548ah-5p/3609                    | 1 |
| <i>circFMN1</i> | miR-548ao-5p/548ax                   | 1 |
| <i>circFMN1</i> | miR-548ap-3p/548aa/548t-3p           | 5 |
| <i>circFMN1</i> | miR-548as-3p                         | 5 |
| <i>circFMN1</i> | miR-548ay-3p/548at-3p                | 5 |
| <i>circFMN1</i> | miR-548b-3p                          | 1 |
| <i>circFMN1</i> | miR-548e-5p                          | 2 |
| <i>circFMN1</i> | miR-548u/7161-5p                     | 5 |
| <i>circFMN1</i> | miR-548v                             | 1 |
| <i>circFMN1</i> | miR-549a                             | 1 |
| <i>circFMN1</i> | miR-551b-5p                          | 1 |
| <i>circFMN1</i> | miR-5581-3p                          | 1 |
| <i>circFMN1</i> | miR-5585-3p                          | 1 |
| <i>circFMN1</i> | miR-5585-5p                          | 1 |
| <i>circFMN1</i> | miR-5589-5p                          | 1 |
| <i>circFMN1</i> | miR-5591-3p                          | 1 |
| <i>circFMN1</i> | miR-5687                             | 1 |
| <i>circFMN1</i> | miR-5695                             | 3 |
| <i>circFMN1</i> | miR-5699-5p                          | 2 |
| <i>circFMN1</i> | miR-575/4676-5p                      | 8 |
| <i>circFMN1</i> | miR-576-3p                           | 1 |
| <i>circFMN1</i> | miR-580-5p                           | 2 |
| <i>circFMN1</i> | miR-582-3p                           | 1 |
| <i>circFMN1</i> | miR-605-3p                           | 2 |
| <i>circFMN1</i> | miR-6084                             | 3 |
| <i>circFMN1</i> | miR-610                              | 1 |
| <i>circFMN1</i> | miR-612/1285-3p/3187-5p/5189-5p/6860 | 2 |
| <i>circFMN1</i> | miR-624-3p                           | 1 |
| <i>circFMN1</i> | miR-624-5p                           | 2 |

|                 |                             |    |
|-----------------|-----------------------------|----|
| <i>circFMN1</i> | miR-629-3p                  | 1  |
| <i>circFMN1</i> | miR-634                     | 4  |
| <i>circFMN1</i> | miR-641/3617-5p             | 3  |
| <i>circFMN1</i> | miR-642a-5p                 | 1  |
| <i>circFMN1</i> | miR-649                     | 1  |
| <i>circFMN1</i> | miR-6508-3p                 | 1  |
| <i>circFMN1</i> | miR-6512-5p                 | 1  |
| <i>circFMN1</i> | miR-6515-3p                 | 2  |
| <i>circFMN1</i> | miR-652-3p                  | 1  |
| <i>circFMN1</i> | miR-652-5p                  | 1  |
| <i>circFMN1</i> | miR-653-5p                  | 1  |
| <i>circFMN1</i> | miR-659-5p                  | 1  |
| <i>circFMN1</i> | miR-670-3p                  | 1  |
| <i>circFMN1</i> | miR-6719-3p                 | 4  |
| <i>circFMN1</i> | miR-6724-5p/6773-5p         | 1  |
| <i>circFMN1</i> | miR-6729-3p                 | 1  |
| <i>circFMN1</i> | miR-6730-3p                 | 4  |
| <i>circFMN1</i> | miR-6732-3p                 | 1  |
| <i>circFMN1</i> | miR-6732-5p                 | 2  |
| <i>circFMN1</i> | miR-6734-3p                 | 1  |
| <i>circFMN1</i> | miR-6747-3p                 | 1  |
| <i>circFMN1</i> | miR-6752-3p                 | 1  |
| <i>circFMN1</i> | miR-6752-5p/6842-5p/7110-5p | 1  |
| <i>circFMN1</i> | miR-6755-3p                 | 1  |
| <i>circFMN1</i> | miR-6758-5p/6856-5p         | 2  |
| <i>circFMN1</i> | miR-6759-3p                 | 2  |
| <i>circFMN1</i> | miR-676-3p                  | 2  |
| <i>circFMN1</i> | miR-6765-3p                 | 4  |
| <i>circFMN1</i> | miR-6770-5p                 | 13 |
| <i>circFMN1</i> | miR-6771-5p                 | 1  |
| <i>circFMN1</i> | miR-6772-3p                 | 1  |
| <i>circFMN1</i> | miR-6773-3p                 | 2  |
| <i>circFMN1</i> | miR-6779-3p                 | 4  |
| <i>circFMN1</i> | miR-6780a-3p                | 1  |
| <i>circFMN1</i> | miR-6784-5p                 | 1  |
| <i>circFMN1</i> | miR-6795-3p                 | 3  |
| <i>circFMN1</i> | miR-6800-3p                 | 2  |
| <i>circFMN1</i> | miR-6801-3p/6810-3p         | 2  |

|                 |             |   |
|-----------------|-------------|---|
| <i>circFMN1</i> | miR-6802-3p | 1 |
| <i>circFMN1</i> | miR-6804-3p | 1 |
| <i>circFMN1</i> | miR-6805-5p | 2 |
| <i>circFMN1</i> | miR-6818-3p | 1 |
| <i>circFMN1</i> | miR-6818-5p | 2 |
| <i>circFMN1</i> | miR-6822-3p | 1 |
| <i>circFMN1</i> | miR-6834-3p | 1 |
| <i>circFMN1</i> | miR-6835-5p | 1 |
| <i>circFMN1</i> | miR-6836-3p | 2 |
| <i>circFMN1</i> | miR-6840-3p | 6 |
| <i>circFMN1</i> | miR-6844    | 2 |
| <i>circFMN1</i> | miR-6858-3p | 8 |
| <i>circFMN1</i> | miR-6861-3p | 1 |
| <i>circFMN1</i> | miR-6867-3p | 1 |
| <i>circFMN1</i> | miR-6872-3p | 1 |
| <i>circFMN1</i> | miR-6881-3p | 1 |
| <i>circFMN1</i> | miR-6887-3p | 3 |
| <i>circFMN1</i> | miR-6895-5p | 1 |
| <i>circFMN1</i> | miR-7-3p    | 1 |
| <i>circFMN1</i> | miR-711     | 2 |
| <i>circFMN1</i> | miR-7111-3p | 1 |
| <i>circFMN1</i> | miR-7112-3p | 1 |
| <i>circFMN1</i> | miR-7112-5p | 1 |
| <i>circFMN1</i> | miR-7151-5p | 2 |
| <i>circFMN1</i> | miR-7156-3p | 1 |
| <i>circFMN1</i> | miR-7158-3p | 1 |
| <i>circFMN1</i> | miR-7160-3p | 1 |
| <i>circFMN1</i> | miR-758-3p  | 1 |
| <i>circFMN1</i> | miR-760     | 1 |
| <i>circFMN1</i> | miR-767-3p  | 2 |
| <i>circFMN1</i> | miR-769-5p  | 3 |
| <i>circFMN1</i> | miR-7843-3p | 1 |
| <i>circFMN1</i> | miR-7856-5p | 1 |
| <i>circFMN1</i> | miR-7976    | 5 |
| <i>circFMN1</i> | miR-8057    | 3 |
| <i>circFMN1</i> | miR-8060    | 1 |
| <i>circFMN1</i> | miR-8063    | 1 |
| <i>circFMN1</i> | miR-8066    | 1 |

|                 |                          |   |
|-----------------|--------------------------|---|
| <i>circFMN1</i> | miR-873-3p               | 2 |
| <i>circFMN1</i> | miR-874-3p               | 1 |
| <i>circFMN1</i> | miR-875-5p               | 1 |
| <i>circFMN1</i> | miR-877-3p               | 1 |
| <i>circFMN1</i> | miR-9-5p                 | 1 |
| <i>circFMN1</i> | miR-922                  | 2 |
| <i>circFMN1</i> | miR-935                  | 1 |
| <i>circFMN1</i> | miR-943                  | 1 |
| <i>circFMN1</i> | let-7i-3p                | 1 |
| <i>circFMN1</i> | miR-100-3p               | 1 |
| <i>circFMN1</i> | miR-103a-2-5p            | 1 |
| <i>circFMN1</i> | miR-105-3p               | 2 |
| <i>circFMN1</i> | miR-10a-3p               | 2 |
| <i>circFMN1</i> | miR-1178-3p              | 6 |
| <i>circFMN1</i> | miR-1178-5p              | 4 |
| <i>circFMN1</i> | miR-1179                 | 2 |
| <i>circFMN1</i> | miR-1181                 | 2 |
| <i>circFMN1</i> | miR-1182                 | 4 |
| <i>circFMN1</i> | miR-1184                 | 4 |
| <i>circFMN1</i> | miR-1199-3p              | 2 |
| <i>circFMN1</i> | miR-1199-5p/6751-3p      | 5 |
| <i>circFMN1</i> | miR-1200                 | 4 |
| <i>circFMN1</i> | miR-1205                 | 4 |
| <i>circFMN1</i> | miR-1207-3p              | 2 |
| <i>circFMN1</i> | miR-1207-5p/4763-3p      | 2 |
| <i>circFMN1</i> | miR-1208                 | 3 |
| <i>circFMN1</i> | miR-122-5p               | 2 |
| <i>circFMN1</i> | miR-1225-3p              | 2 |
| <i>circFMN1</i> | miR-1226-3p              | 2 |
| <i>circFMN1</i> | miR-1228-3p              | 2 |
| <i>circFMN1</i> | miR-1231                 | 1 |
| <i>circFMN1</i> | miR-1233-5p/6778-5p      | 5 |
| <i>circFMN1</i> | miR-1236-5p              | 2 |
| <i>circFMN1</i> | miR-1237-5p/4488/4697-5p | 2 |
| <i>circFMN1</i> | miR-124-5p               | 1 |
| <i>circFMN1</i> | miR-1243                 | 2 |
| <i>circFMN1</i> | miR-1245a/8079           | 5 |
| <i>circFMN1</i> | miR-125-5p               | 2 |

|                 |                                      |   |
|-----------------|--------------------------------------|---|
| <i>circFMN1</i> | miR-1251-3p                          | 2 |
| <i>circFMN1</i> | miR-1255a/1255b-5p                   | 3 |
| <i>circFMN1</i> | miR-125a-3p                          | 2 |
| <i>circFMN1</i> | miR-125b-1-3p                        | 2 |
| <i>circFMN1</i> | miR-125b-2-3p                        | 2 |
| <i>circFMN1</i> | miR-1260a/1260b                      | 4 |
| <i>circFMN1</i> | miR-1264                             | 2 |
| <i>circFMN1</i> | miR-1266-3p                          | 2 |
| <i>circFMN1</i> | miR-1270                             | 7 |
| <i>circFMN1</i> | miR-1273d                            | 4 |
| <i>circFMN1</i> | miR-1273f                            | 5 |
| <i>circFMN1</i> | miR-1273g-3p                         | 2 |
| <i>circFMN1</i> | miR-1273h-3p                         | 8 |
| <i>circFMN1</i> | miR-1285-5p                          | 4 |
| <i>circFMN1</i> | miR-1286                             | 5 |
| <i>circFMN1</i> | miR-1288-3p                          | 1 |
| <i>circFMN1</i> | miR-1291/6775-3p                     | 2 |
| <i>circFMN1</i> | miR-1293/4483                        | 2 |
| <i>circFMN1</i> | miR-1294                             | 2 |
| <i>circFMN1</i> | miR-1295b-5p/1912                    | 4 |
| <i>circFMN1</i> | miR-1296-3p                          | 3 |
| <i>circFMN1</i> | miR-1298-5p                          | 2 |
| <i>circFMN1</i> | miR-1307-3p                          | 1 |
| <i>circFMN1</i> | miR-1323                             | 5 |
| <i>circFMN1</i> | miR-133a-3p.1                        | 1 |
| <i>circFMN1</i> | miR-1343-3p                          | 3 |
| <i>circFMN1</i> | miR-135-5p                           | 2 |
| <i>circFMN1</i> | miR-136-3p                           | 1 |
| <i>circFMN1</i> | miR-138-1-3p                         | 3 |
| <i>circFMN1</i> | miR-138-2-3p                         | 2 |
| <i>circFMN1</i> | miR-139-5p                           | 1 |
| <i>circFMN1</i> | miR-143-3p                           | 5 |
| <i>circFMN1</i> | miR-143-5p                           | 2 |
| <i>circFMN1</i> | miR-146-5p                           | 3 |
| <i>circFMN1</i> | miR-1468-3p                          | 3 |
| <i>circFMN1</i> | miR-149-3p/4728-5p/6785-5p/6883-5p   | 2 |
| <i>circFMN1</i> | miR-15-5p/16-5p/195-5p/424-5p/497-5p | 6 |
| <i>circFMN1</i> | miR-151-3p                           | 1 |

|                 |                      |   |
|-----------------|----------------------|---|
| <i>circFMN1</i> | miR-152-5p           | 1 |
| <i>circFMN1</i> | miR-153-5p           | 2 |
| <i>circFMN1</i> | miR-1537-3p          | 1 |
| <i>circFMN1</i> | miR-1587/3620-5p     | 5 |
| <i>circFMN1</i> | miR-15b-3p           | 2 |
| <i>circFMN1</i> | miR-16-1-3p          | 1 |
| <i>circFMN1</i> | miR-17-3p            | 4 |
| <i>circFMN1</i> | miR-18-5p            | 1 |
| <i>circFMN1</i> | miR-181-3p/4420      | 4 |
| <i>circFMN1</i> | miR-184              | 1 |
| <i>circFMN1</i> | miR-185-5p           | 6 |
| <i>circFMN1</i> | miR-187-5p           | 3 |
| <i>circFMN1</i> | miR-188-3p           | 4 |
| <i>circFMN1</i> | miR-18b-3p           | 2 |
| <i>circFMN1</i> | miR-1910-3p/6511a-5p | 2 |
| <i>circFMN1</i> | miR-192-5p/215-5p    | 2 |
| <i>circFMN1</i> | miR-193a-5p          | 2 |
| <i>circFMN1</i> | miR-193b-5p          | 4 |
| <i>circFMN1</i> | miR-194-3p           | 2 |
| <i>circFMN1</i> | miR-194-5p           | 4 |
| <i>circFMN1</i> | miR-200-3p/429       | 2 |
| <i>circFMN1</i> | miR-203b-5p/6718-5p  | 2 |
| <i>circFMN1</i> | miR-204-3p/4646-5p   | 1 |
| <i>circFMN1</i> | miR-208-5p           | 4 |
| <i>circFMN1</i> | miR-2110             | 4 |
| <i>circFMN1</i> | miR-2113             | 2 |
| <i>circFMN1</i> | miR-2115-3p          | 2 |
| <i>circFMN1</i> | miR-2115-5p          | 2 |
| <i>circFMN1</i> | miR-2117             | 2 |
| <i>circFMN1</i> | miR-214-5p           | 3 |
| <i>circFMN1</i> | miR-218-5p           | 4 |
| <i>circFMN1</i> | miR-219a-2-3p        | 1 |
| <i>circFMN1</i> | miR-219b-3p          | 1 |
| <i>circFMN1</i> | miR-22-3p            | 2 |
| <i>circFMN1</i> | miR-221-5p/8073      | 1 |
| <i>circFMN1</i> | miR-2276-3p          | 2 |
| <i>circFMN1</i> | miR-2276-5p          | 2 |
| <i>circFMN1</i> | miR-2392             | 3 |

|                 |                                              |   |
|-----------------|----------------------------------------------|---|
| <i>circFMN1</i> | miR-24-3p                                    | 3 |
| <i>circFMN1</i> | miR-2467-3p                                  | 2 |
| <i>circFMN1</i> | miR-2467-5p                                  | 2 |
| <i>circFMN1</i> | miR-26-3p                                    | 2 |
| <i>circFMN1</i> | miR-2682-3p/6781-3p                          | 2 |
| <i>circFMN1</i> | miR-27a-5p                                   | 3 |
| <i>circFMN1</i> | miR-28-5p/708-5p                             | 3 |
| <i>circFMN1</i> | miR-29-3p                                    | 2 |
| <i>circFMN1</i> | miR-299-5p                                   | 2 |
| <i>circFMN1</i> | miR-30-3p                                    | 4 |
| <i>circFMN1</i> | miR-301a-5p/301b-5p                          | 7 |
| <i>circFMN1</i> | miR-302f                                     | 2 |
| <i>circFMN1</i> | miR-30b-3p/1273h-5p/3689-3p/6779-5p/6780a-5p | 6 |
| <i>circFMN1</i> | miR-30c-3p/6788-5p                           | 2 |
| <i>circFMN1</i> | miR-3123                                     | 6 |
| <i>circFMN1</i> | miR-3124-3p                                  | 1 |
| <i>circFMN1</i> | miR-3126-5p                                  | 6 |
| <i>circFMN1</i> | miR-3127-5p                                  | 2 |
| <i>circFMN1</i> | miR-3128                                     | 3 |
| <i>circFMN1</i> | miR-3130-5p/4482-5p                          | 4 |
| <i>circFMN1</i> | miR-3136-3p/7155-3p                          | 2 |
| <i>circFMN1</i> | miR-3148                                     | 2 |
| <i>circFMN1</i> | miR-3150a-3p                                 | 4 |
| <i>circFMN1</i> | miR-3151-3p                                  | 3 |
| <i>circFMN1</i> | miR-3153/6733-5p/6739-5p                     | 4 |
| <i>circFMN1</i> | miR-3156-3p                                  | 4 |
| <i>circFMN1</i> | miR-3156-5p                                  | 2 |
| <i>circFMN1</i> | miR-3158-3p                                  | 3 |
| <i>circFMN1</i> | miR-3158-5p                                  | 4 |
| <i>circFMN1</i> | miR-3160-3p                                  | 6 |
| <i>circFMN1</i> | miR-3166                                     | 6 |
| <i>circFMN1</i> | miR-3182                                     | 1 |
| <i>circFMN1</i> | miR-3184-3p                                  | 2 |
| <i>circFMN1</i> | miR-3187-3p                                  | 3 |
| <i>circFMN1</i> | miR-3188                                     | 2 |
| <i>circFMN1</i> | miR-3192-3p                                  | 4 |
| <i>circFMN1</i> | miR-3192-5p                                  | 1 |
| <i>circFMN1</i> | miR-3194-3p                                  | 2 |

|                 |                           |   |
|-----------------|---------------------------|---|
| <i>circFMN1</i> | miR-3197                  | 1 |
| <i>circFMN1</i> | miR-328-3p                | 4 |
| <i>circFMN1</i> | miR-329-5p                | 2 |
| <i>circFMN1</i> | miR-335-5p                | 4 |
| <i>circFMN1</i> | miR-338-3p                | 5 |
| <i>circFMN1</i> | miR-339-3p                | 2 |
| <i>circFMN1</i> | miR-33b-3p/515-3p/519e-3p | 2 |
| <i>circFMN1</i> | miR-34-5p/449-5p          | 3 |
| <i>circFMN1</i> | miR-345-5p                | 6 |
| <i>circFMN1</i> | miR-34b-3p                | 2 |
| <i>circFMN1</i> | miR-34b-5p/449c-5p        | 2 |
| <i>circFMN1</i> | miR-34c-3p                | 2 |
| <i>circFMN1</i> | miR-3591-5p               | 2 |
| <i>circFMN1</i> | miR-3607-3p               | 2 |
| <i>circFMN1</i> | miR-3612                  | 3 |
| <i>circFMN1</i> | miR-3618                  | 2 |
| <i>circFMN1</i> | miR-3619-3p               | 5 |
| <i>circFMN1</i> | miR-3620-3p               | 6 |
| <i>circFMN1</i> | miR-363-5p/6745           | 2 |
| <i>circFMN1</i> | miR-3654                  | 2 |
| <i>circFMN1</i> | miR-3658                  | 2 |
| <i>circFMN1</i> | miR-3663-5p               | 1 |
| <i>circFMN1</i> | miR-3664-5p               | 2 |
| <i>circFMN1</i> | miR-3670                  | 2 |
| <i>circFMN1</i> | miR-3672/6864-3p          | 4 |
| <i>circFMN1</i> | miR-3675-5p               | 2 |
| <i>circFMN1</i> | miR-3677-3p               | 2 |
| <i>circFMN1</i> | miR-3677-5p               | 3 |
| <i>circFMN1</i> | miR-3678-3p               | 8 |
| <i>circFMN1</i> | miR-3681-5p               | 2 |
| <i>circFMN1</i> | miR-3687/4442             | 3 |
| <i>circFMN1</i> | miR-3689d/6851-5p         | 2 |
| <i>circFMN1</i> | miR-3691-5p               | 2 |
| <i>circFMN1</i> | miR-3692-5p               | 2 |
| <i>circFMN1</i> | miR-371a-3p               | 2 |
| <i>circFMN1</i> | miR-371b-3p               | 2 |
| <i>circFMN1</i> | miR-374c-3p               | 2 |
| <i>circFMN1</i> | miR-377-5p/6086           | 2 |



|                 |                       |   |
|-----------------|-----------------------|---|
| <i>circFMN1</i> | miR-378a-5p           | 4 |
| <i>circFMN1</i> | miR-378j/6839-5p      | 3 |
| <i>circFMN1</i> | miR-3908              | 2 |
| <i>circFMN1</i> | miR-3912-5p           | 1 |
| <i>circFMN1</i> | miR-3917              | 2 |
| <i>circFMN1</i> | miR-3918              | 2 |
| <i>circFMN1</i> | miR-3920              | 2 |
| <i>circFMN1</i> | miR-3921/4653-5p      | 7 |
| <i>circFMN1</i> | miR-3925-5p           | 6 |
| <i>circFMN1</i> | miR-3934-3p           | 3 |
| <i>circFMN1</i> | miR-3934-5p           | 2 |
| <i>circFMN1</i> | miR-3936              | 4 |
| <i>circFMN1</i> | miR-3940-5p/4507      | 3 |
| <i>circFMN1</i> | miR-3942-5p           | 2 |
| <i>circFMN1</i> | miR-3973              | 4 |
| <i>circFMN1</i> | miR-3975              | 2 |
| <i>circFMN1</i> | miR-3977              | 4 |
| <i>circFMN1</i> | miR-425-5p            | 2 |
| <i>circFMN1</i> | miR-4251              | 8 |
| <i>circFMN1</i> | miR-4252              | 2 |
| <i>circFMN1</i> | miR-4256              | 2 |
| <i>circFMN1</i> | miR-4257              | 4 |
| <i>circFMN1</i> | miR-4263              | 4 |
| <i>circFMN1</i> | miR-4264              | 3 |
| <i>circFMN1</i> | miR-4269/6715b-5p     | 2 |
| <i>circFMN1</i> | miR-4270/4441/6754-5p | 4 |
| <i>circFMN1</i> | miR-4274              | 1 |
| <i>circFMN1</i> | miR-4276              | 2 |
| <i>circFMN1</i> | miR-4281              | 2 |
| <i>circFMN1</i> | miR-4282              | 2 |
| <i>circFMN1</i> | miR-4283              | 2 |
| <i>circFMN1</i> | miR-4284              | 3 |
| <i>circFMN1</i> | miR-4293              | 6 |
| <i>circFMN1</i> | miR-4313              | 2 |
| <i>circFMN1</i> | miR-4316              | 2 |
| <i>circFMN1</i> | miR-4318              | 1 |
| <i>circFMN1</i> | miR-432-3p            | 3 |
| <i>circFMN1</i> | miR-4320              | 2 |

|                 |                                    |    |
|-----------------|------------------------------------|----|
| <i>circFMN1</i> | miR-4324                           | 6  |
| <i>circFMN1</i> | miR-4329                           | 8  |
| <i>circFMN1</i> | miR-433-3p                         | 1  |
| <i>circFMN1</i> | miR-4417                           | 2  |
| <i>circFMN1</i> | miR-4419a/4510/6127/6129/6130/6133 | 6  |
| <i>circFMN1</i> | miR-4421/5699-3p                   | 1  |
| <i>circFMN1</i> | miR-4423-5p                        | 1  |
| <i>circFMN1</i> | miR-4433a-3p                       | 11 |
| <i>circFMN1</i> | miR-4434/4516/5703                 | 8  |
| <i>circFMN1</i> | miR-4435                           | 3  |
| <i>circFMN1</i> | miR-4436b-5p                       | 2  |
| <i>circFMN1</i> | miR-4444                           | 2  |
| <i>circFMN1</i> | miR-4446-3p                        | 3  |
| <i>circFMN1</i> | miR-4454                           | 2  |
| <i>circFMN1</i> | miR-4457                           | 2  |
| <i>circFMN1</i> | miR-4459                           | 11 |
| <i>circFMN1</i> | miR-4460                           | 2  |
| <i>circFMN1</i> | miR-4464/4748                      | 2  |
| <i>circFMN1</i> | miR-4468                           | 10 |
| <i>circFMN1</i> | miR-4473                           | 2  |
| <i>circFMN1</i> | miR-4475                           | 5  |
| <i>circFMN1</i> | miR-4476/6876-5p                   | 4  |
| <i>circFMN1</i> | miR-4481/4745-5p                   | 2  |
| <i>circFMN1</i> | miR-4487                           | 6  |
| <i>circFMN1</i> | miR-4489                           | 2  |
| <i>circFMN1</i> | miR-4494                           | 1  |
| <i>circFMN1</i> | miR-449b-3p                        | 6  |
| <i>circFMN1</i> | miR-4502                           | 2  |
| <i>circFMN1</i> | miR-4509                           | 1  |
| <i>circFMN1</i> | miR-4513/6855-3p                   | 2  |
| <i>circFMN1</i> | miR-4514/4692                      | 2  |
| <i>circFMN1</i> | miR-4515                           | 1  |
| <i>circFMN1</i> | miR-4519                           | 1  |
| <i>circFMN1</i> | miR-451b                           | 2  |
| <i>circFMN1</i> | miR-4530                           | 5  |
| <i>circFMN1</i> | miR-4531                           | 7  |
| <i>circFMN1</i> | miR-4532                           | 2  |
| <i>circFMN1</i> | miR-455-3p.2                       | 2  |

|                 |                             |   |
|-----------------|-----------------------------|---|
| <i>circFMN1</i> | miR-4634                    | 1 |
| <i>circFMN1</i> | miR-4635                    | 3 |
| <i>circFMN1</i> | miR-4638-5p                 | 1 |
| <i>circFMN1</i> | miR-4639-3p                 | 2 |
| <i>circFMN1</i> | miR-4643                    | 1 |
| <i>circFMN1</i> | miR-4645-3p                 | 2 |
| <i>circFMN1</i> | miR-4648                    | 5 |
| <i>circFMN1</i> | miR-4654/4769-5p            | 5 |
| <i>circFMN1</i> | miR-4656                    | 4 |
| <i>circFMN1</i> | miR-4660                    | 2 |
| <i>circFMN1</i> | miR-4663                    | 2 |
| <i>circFMN1</i> | miR-4667-5p/4700-5p/8089    | 2 |
| <i>circFMN1</i> | miR-4668-5p                 | 4 |
| <i>circFMN1</i> | miR-4671-3p                 | 2 |
| <i>circFMN1</i> | miR-4671-5p                 | 4 |
| <i>circFMN1</i> | miR-4674                    | 5 |
| <i>circFMN1</i> | miR-4675/4741               | 4 |
| <i>circFMN1</i> | miR-4682                    | 4 |
| <i>circFMN1</i> | miR-4685-5p/6837-5p         | 2 |
| <i>circFMN1</i> | miR-4690-3p/5685            | 2 |
| <i>circFMN1</i> | miR-4690-5p                 | 7 |
| <i>circFMN1</i> | miR-4693-3p                 | 2 |
| <i>circFMN1</i> | miR-4693-5p                 | 2 |
| <i>circFMN1</i> | miR-4695-5p                 | 5 |
| <i>circFMN1</i> | miR-4708-5p                 | 5 |
| <i>circFMN1</i> | miR-4710                    | 2 |
| <i>circFMN1</i> | miR-4714-5p                 | 2 |
| <i>circFMN1</i> | miR-4717-5p                 | 2 |
| <i>circFMN1</i> | miR-4720-5p/4799-3p/5588-5p | 3 |
| <i>circFMN1</i> | miR-4722-5p                 | 5 |
| <i>circFMN1</i> | miR-4725-5p                 | 4 |
| <i>circFMN1</i> | miR-4727-3p                 | 2 |
| <i>circFMN1</i> | miR-4728-3p                 | 4 |
| <i>circFMN1</i> | miR-4732-3p                 | 2 |
| <i>circFMN1</i> | miR-4733-3p                 | 2 |
| <i>circFMN1</i> | miR-4733-5p                 | 2 |
| <i>circFMN1</i> | miR-4736                    | 2 |
| <i>circFMN1</i> | miR-4738-5p                 | 2 |

|                 |                             |    |
|-----------------|-----------------------------|----|
| <i>circFMN1</i> | miR-4739                    | 5  |
| <i>circFMN1</i> | miR-4740-5p                 | 1  |
| <i>circFMN1</i> | miR-4742-5p                 | 2  |
| <i>circFMN1</i> | miR-4744                    | 1  |
| <i>circFMN1</i> | miR-4746-5p                 | 2  |
| <i>circFMN1</i> | miR-4750-3p                 | 5  |
| <i>circFMN1</i> | miR-4753-5p                 | 2  |
| <i>circFMN1</i> | miR-4755-3p                 | 4  |
| <i>circFMN1</i> | miR-4755-5p/5006-3p         | 1  |
| <i>circFMN1</i> | miR-4765                    | 2  |
| <i>circFMN1</i> | miR-4768-3p                 | 11 |
| <i>circFMN1</i> | miR-4768-5p/6833-3p         | 5  |
| <i>circFMN1</i> | miR-4771                    | 6  |
| <i>circFMN1</i> | miR-4772-3p                 | 2  |
| <i>circFMN1</i> | miR-4779                    | 5  |
| <i>circFMN1</i> | miR-4781-5p                 | 1  |
| <i>circFMN1</i> | miR-4785                    | 4  |
| <i>circFMN1</i> | miR-4789-3p                 | 1  |
| <i>circFMN1</i> | miR-4792                    | 2  |
| <i>circFMN1</i> | miR-4795-5p                 | 3  |
| <i>circFMN1</i> | miR-4796-3p                 | 3  |
| <i>circFMN1</i> | miR-4797-3p                 | 3  |
| <i>circFMN1</i> | miR-4799-5p                 | 2  |
| <i>circFMN1</i> | miR-485-5p                  | 2  |
| <i>circFMN1</i> | miR-486-5p                  | 2  |
| <i>circFMN1</i> | miR-490-5p                  | 2  |
| <i>circFMN1</i> | miR-493-3p                  | 2  |
| <i>circFMN1</i> | miR-495-3p                  | 2  |
| <i>circFMN1</i> | miR-499a-3p/499b-3p         | 1  |
| <i>circFMN1</i> | miR-499b-5p                 | 1  |
| <i>circFMN1</i> | miR-5008-3p/6737-3p/7157-3p | 8  |
| <i>circFMN1</i> | miR-5009-3p                 | 1  |
| <i>circFMN1</i> | miR-5010-3p                 | 2  |
| <i>circFMN1</i> | miR-503-5p                  | 6  |
| <i>circFMN1</i> | miR-504-3p                  | 3  |
| <i>circFMN1</i> | miR-5088-5p                 | 3  |
| <i>circFMN1</i> | miR-5092                    | 2  |
| <i>circFMN1</i> | miR-513c-5p/514b-5p         | 2  |

|                 |                                                                    |   |
|-----------------|--------------------------------------------------------------------|---|
| <i>circFMN1</i> | miR-514a-3p                                                        | 2 |
| <i>circFMN1</i> | miR-514a-5p                                                        | 2 |
| <i>circFMN1</i> | miR-516a-3p/516b-3p/7162-5p                                        | 2 |
| <i>circFMN1</i> | miR-518e-3p                                                        | 2 |
| <i>circFMN1</i> | miR-5192                                                           | 6 |
| <i>circFMN1</i> | miR-5197-5p                                                        | 4 |
| <i>circFMN1</i> | miR-520g-3p                                                        | 4 |
| <i>circFMN1</i> | miR-544b                                                           | 6 |
| <i>circFMN1</i> | miR-545-5p                                                         | 2 |
| <i>circFMN1</i> | miR-548aj-5p/548f-5p/548g-5p/548x-5p                               | 3 |
| <i>circFMN1</i> | miR-548au-3p                                                       | 3 |
| <i>circFMN1</i> | miR-548av-5p/548k/8054                                             | 1 |
| <i>circFMN1</i> | miR-548ay-5p/548au-5p/548as-5p/548ar-5p/548aq-5p/548ap-5p/548am-5p | 1 |
| <i>circFMN1</i> | miR-548l                                                           | 1 |
| <i>circFMN1</i> | miR-548p                                                           | 5 |
| <i>circFMN1</i> | miR-548s                                                           | 3 |
| <i>circFMN1</i> | miR-550a-3-5p/550a-5p/1271-3p                                      | 2 |
| <i>circFMN1</i> | miR-556-5p                                                         | 3 |
| <i>circFMN1</i> | miR-558                                                            | 6 |
| <i>circFMN1</i> | miR-5580-5p                                                        | 2 |
| <i>circFMN1</i> | miR-5584-5p                                                        | 6 |
| <i>circFMN1</i> | miR-5586-5p                                                        | 2 |
| <i>circFMN1</i> | miR-5691                                                           | 2 |
| <i>circFMN1</i> | miR-5693                                                           | 2 |
| <i>circFMN1</i> | miR-5696                                                           | 2 |
| <i>circFMN1</i> | miR-573/3616-5p                                                    | 4 |
| <i>circFMN1</i> | miR-576-5p                                                         | 4 |
| <i>circFMN1</i> | miR-579-3p                                                         | 2 |
| <i>circFMN1</i> | miR-588                                                            | 3 |
| <i>circFMN1</i> | miR-589-3p                                                         | 5 |
| <i>circFMN1</i> | miR-589-5p                                                         | 3 |
| <i>circFMN1</i> | miR-591                                                            | 2 |
| <i>circFMN1</i> | miR-592                                                            | 2 |
| <i>circFMN1</i> | miR-593-3p                                                         | 2 |
| <i>circFMN1</i> | miR-595                                                            | 2 |
| <i>circFMN1</i> | miR-596                                                            | 6 |
| <i>circFMN1</i> | miR-597-3p                                                         | 1 |
| <i>circFMN1</i> | miR-597-5p                                                         | 3 |

|                 |                    |   |
|-----------------|--------------------|---|
| <i>circFMN1</i> | miR-599            | 2 |
| <i>circFMN1</i> | miR-604            | 5 |
| <i>circFMN1</i> | miR-605-5p         | 2 |
| <i>circFMN1</i> | miR-6071           | 2 |
| <i>circFMN1</i> | miR-6075           | 4 |
| <i>circFMN1</i> | miR-6077           | 2 |
| <i>circFMN1</i> | miR-6079           | 4 |
| <i>circFMN1</i> | miR-6080           | 2 |
| <i>circFMN1</i> | miR-6081           | 4 |
| <i>circFMN1</i> | miR-6087           | 1 |
| <i>circFMN1</i> | miR-6090           | 2 |
| <i>circFMN1</i> | miR-6124           | 2 |
| <i>circFMN1</i> | miR-6125           | 1 |
| <i>circFMN1</i> | miR-616-3p         | 4 |
| <i>circFMN1</i> | miR-6165           | 7 |
| <i>circFMN1</i> | miR-617            | 1 |
| <i>circFMN1</i> | miR-619-5p/6506-5p | 1 |
| <i>circFMN1</i> | miR-626/6876-3p    | 1 |
| <i>circFMN1</i> | miR-627-5p         | 2 |
| <i>circFMN1</i> | miR-629-5p         | 4 |
| <i>circFMN1</i> | miR-632/4288       | 1 |
| <i>circFMN1</i> | miR-637            | 2 |
| <i>circFMN1</i> | miR-640            | 3 |
| <i>circFMN1</i> | miR-646            | 6 |
| <i>circFMN1</i> | miR-648            | 2 |
| <i>circFMN1</i> | miR-6499-3p        | 3 |
| <i>circFMN1</i> | miR-6501-3p        | 7 |
| <i>circFMN1</i> | miR-6501-5p        | 1 |
| <i>circFMN1</i> | miR-6502-3p        | 3 |
| <i>circFMN1</i> | miR-6505-3p        | 1 |
| <i>circFMN1</i> | miR-6509-3p        | 2 |
| <i>circFMN1</i> | miR-6510-5p        | 7 |
| <i>circFMN1</i> | miR-653-3p         | 4 |
| <i>circFMN1</i> | miR-654-5p         | 2 |
| <i>circFMN1</i> | miR-655-5p         | 2 |
| <i>circFMN1</i> | miR-663b           | 2 |
| <i>circFMN1</i> | miR-664a-3p        | 2 |
| <i>circFMN1</i> | miR-664b-5p        | 3 |

|                 |                       |   |
|-----------------|-----------------------|---|
| <i>circFMN1</i> | miR-668-3p            | 2 |
| <i>circFMN1</i> | miR-670-5p            | 2 |
| <i>circFMN1</i> | miR-671-5p            | 8 |
| <i>circFMN1</i> | miR-6726-3p           | 4 |
| <i>circFMN1</i> | miR-6728-3p           | 2 |
| <i>circFMN1</i> | miR-6731-3p           | 2 |
| <i>circFMN1</i> | miR-6731-5p/8085      | 3 |
| <i>circFMN1</i> | miR-6740-3p           | 2 |
| <i>circFMN1</i> | miR-6742-3p           | 1 |
| <i>circFMN1</i> | miR-6744-5p           | 3 |
| <i>circFMN1</i> | miR-6748-3p           | 1 |
| <i>circFMN1</i> | miR-6748-5p           | 1 |
| <i>circFMN1</i> | miR-675-5p/4466       | 1 |
| <i>circFMN1</i> | miR-6750-5p/6822-5p   | 6 |
| <i>circFMN1</i> | miR-6753-5p           | 2 |
| <i>circFMN1</i> | miR-6756-5p/6766-5p   | 2 |
| <i>circFMN1</i> | miR-6757-3p           | 1 |
| <i>circFMN1</i> | miR-6760-3p           | 3 |
| <i>circFMN1</i> | miR-6760-5p           | 5 |
| <i>circFMN1</i> | miR-6761-5p           | 8 |
| <i>circFMN1</i> | miR-6762-3p           | 5 |
| <i>circFMN1</i> | miR-6769a-5p/6769b-5p | 2 |
| <i>circFMN1</i> | miR-6771-3p           | 4 |
| <i>circFMN1</i> | miR-6777-3p           | 4 |
| <i>circFMN1</i> | miR-6785-3p           | 1 |
| <i>circFMN1</i> | miR-6786-5p           | 2 |
| <i>circFMN1</i> | miR-6787-3p           | 2 |
| <i>circFMN1</i> | miR-6788-3p           | 2 |
| <i>circFMN1</i> | miR-6793-5p           | 1 |
| <i>circFMN1</i> | miR-6796-3p           | 2 |
| <i>circFMN1</i> | miR-6799-5p           | 2 |
| <i>circFMN1</i> | miR-6807-5p           | 2 |
| <i>circFMN1</i> | miR-6808-3p           | 1 |
| <i>circFMN1</i> | miR-6809-3p           | 5 |
| <i>circFMN1</i> | miR-6810-5p           | 4 |
| <i>circFMN1</i> | miR-6811-3p           | 3 |
| <i>circFMN1</i> | miR-6815-3p           | 3 |
| <i>circFMN1</i> | miR-6815-5p/6865-5p   | 2 |

|                 |                     |   |
|-----------------|---------------------|---|
| <i>circFMN1</i> | miR-6817-3p         | 6 |
| <i>circFMN1</i> | miR-6823-5p         | 4 |
| <i>circFMN1</i> | miR-6825-3p         | 2 |
| <i>circFMN1</i> | miR-6828-3p         | 2 |
| <i>circFMN1</i> | miR-6828-5p         | 8 |
| <i>circFMN1</i> | miR-6829-5p         | 4 |
| <i>circFMN1</i> | miR-6838-3p         | 3 |
| <i>circFMN1</i> | miR-6839-3p         | 3 |
| <i>circFMN1</i> | miR-6843-3p/6848-3p | 2 |
| <i>circFMN1</i> | miR-6845-3p         | 4 |
| <i>circFMN1</i> | miR-6846-5p/6848-5p | 2 |
| <i>circFMN1</i> | miR-6847-5p         | 4 |
| <i>circFMN1</i> | miR-6850-3p         | 2 |
| <i>circFMN1</i> | miR-6851-3p         | 2 |
| <i>circFMN1</i> | miR-6852-5p         | 1 |
| <i>circFMN1</i> | miR-6853-5p         | 3 |
| <i>circFMN1</i> | miR-6857-3p         | 2 |
| <i>circFMN1</i> | miR-6857-5p         | 4 |
| <i>circFMN1</i> | miR-6863            | 2 |
| <i>circFMN1</i> | miR-6867-5p         | 3 |
| <i>circFMN1</i> | miR-6868-5p         | 3 |
| <i>circFMN1</i> | miR-6871-3p         | 2 |
| <i>circFMN1</i> | miR-6873-3p         | 4 |
| <i>circFMN1</i> | miR-6873-5p         | 2 |
| <i>circFMN1</i> | miR-6874-5p         | 2 |
| <i>circFMN1</i> | miR-6878-5p         | 3 |
| <i>circFMN1</i> | miR-6882-5p         | 2 |
| <i>circFMN1</i> | miR-6883-3p         | 2 |
| <i>circFMN1</i> | miR-6888-5p         | 6 |
| <i>circFMN1</i> | miR-6889-3p         | 8 |
| <i>circFMN1</i> | miR-6890-5p         | 2 |
| <i>circFMN1</i> | miR-6892-3p         | 2 |
| <i>circFMN1</i> | miR-6895-3p         | 2 |
| <i>circFMN1</i> | miR-7-5p            | 2 |
| <i>circFMN1</i> | miR-7106-5p         | 2 |
| <i>circFMN1</i> | miR-7110-3p         | 6 |
| <i>circFMN1</i> | miR-7113-5p         | 2 |
| <i>circFMN1</i> | miR-7150            | 4 |



|                 |                              |   |
|-----------------|------------------------------|---|
| <i>circFMN1</i> | miR-7152-3p                  | 1 |
| <i>circFMN1</i> | miR-7154-5p                  | 1 |
| <i>circFMN1</i> | miR-7155-5p                  | 2 |
| <i>circFMN1</i> | miR-7158-5p                  | 6 |
| <i>circFMN1</i> | miR-7160-5p                  | 2 |
| <i>circFMN1</i> | miR-744-3p                   | 2 |
| <i>circFMN1</i> | miR-762/4492/4498/5001-5p    | 4 |
| <i>circFMN1</i> | miR-767-5p                   | 2 |
| <i>circFMN1</i> | miR-770-5p                   | 2 |
| <i>circFMN1</i> | miR-7702                     | 2 |
| <i>circFMN1</i> | miR-7845-5p                  | 4 |
| <i>circFMN1</i> | miR-7846-3p                  | 2 |
| <i>circFMN1</i> | miR-7847-3p                  | 2 |
| <i>circFMN1</i> | miR-7855-5p                  | 2 |
| <i>circFMN1</i> | miR-802                      | 2 |
| <i>circFMN1</i> | miR-8056                     | 2 |
| <i>circFMN1</i> | miR-8062                     | 5 |
| <i>circFMN1</i> | miR-8064                     | 2 |
| <i>circFMN1</i> | miR-8077                     | 2 |
| <i>circFMN1</i> | miR-8084                     | 2 |
| <i>circFMN1</i> | miR-873-5p.1                 | 2 |
| <i>circFMN1</i> | miR-873-5p.2                 | 5 |
| <i>circFMN1</i> | miR-874-5p                   | 4 |
| <i>circFMN1</i> | miR-889-5p                   | 2 |
| <i>circFMN1</i> | miR-891a-5p                  | 2 |
| <i>circFMN1</i> | miR-892a                     | 1 |
| <i>circFMN1</i> | miR-9-3p                     | 2 |
| <i>circFMN1</i> | miR-920/4300/5591-5p/6726-5p | 2 |
| <i>circFMN1</i> | miR-92a-2-5p                 | 2 |
| <i>circFMN1</i> | miR-92b-5p                   | 1 |
| <i>circFMN1</i> | miR-93-3p                    | 2 |
| <i>circFMN1</i> | miR-933                      | 1 |
| <i>circFMN1</i> | miR-934                      | 2 |
| <i>circFMN1</i> | miR-937-5p                   | 2 |
| <i>circFMN1</i> | miR-939-3p                   | 1 |
| <i>circFMN1</i> | miR-940/6808-5p/6893-5p      | 2 |
| <i>circFMN1</i> | miR-942-5p                   | 5 |
| <i>circFMN1</i> | miR-9500                     | 6 |

|                  |                          |   |
|------------------|--------------------------|---|
| <i>circFMN1</i>  | miR-99-3p                | 2 |
| <i>circFOXN2</i> | let-7a-2-3p/let-7g-3p    | 1 |
| <i>circFOXN2</i> | let-7c-3p                | 1 |
| <i>circFOXN2</i> | miR-100-3p               | 4 |
| <i>circFOXN2</i> | miR-101-3p.2             | 2 |
| <i>circFOXN2</i> | miR-103-3p/107           | 2 |
| <i>circFOXN2</i> | miR-103a-2-5p            | 3 |
| <i>circFOXN2</i> | miR-106a-3p              | 4 |
| <i>circFOXN2</i> | miR-1178-3p              | 2 |
| <i>circFOXN2</i> | miR-1180-5p              | 1 |
| <i>circFOXN2</i> | miR-1206                 | 2 |
| <i>circFOXN2</i> | miR-1208                 | 2 |
| <i>circFOXN2</i> | miR-1234-3p/7107-5p      | 2 |
| <i>circFOXN2</i> | miR-1237-5p/4488/4697-5p | 2 |
| <i>circFOXN2</i> | miR-1238-5p/4758-5p      | 1 |
| <i>circFOXN2</i> | miR-1243                 | 2 |
| <i>circFOXN2</i> | miR-1250-3p              | 3 |
| <i>circFOXN2</i> | miR-1251-3p              | 3 |
| <i>circFOXN2</i> | miR-1252-3p              | 2 |
| <i>circFOXN2</i> | miR-1253                 | 2 |
| <i>circFOXN2</i> | miR-1254/3116            | 3 |
| <i>circFOXN2</i> | miR-1255b-2-3p           | 1 |
| <i>circFOXN2</i> | miR-126-5p               | 2 |
| <i>circFOXN2</i> | miR-1265                 | 2 |
| <i>circFOXN2</i> | miR-1266-3p              | 2 |
| <i>circFOXN2</i> | miR-1267                 | 2 |
| <i>circFOXN2</i> | miR-1269                 | 2 |
| <i>circFOXN2</i> | miR-127-5p               | 2 |
| <i>circFOXN2</i> | miR-1270                 | 3 |
| <i>circFOXN2</i> | miR-1273g-3p             | 1 |
| <i>circFOXN2</i> | miR-1275/4665-5p         | 2 |
| <i>circFOXN2</i> | miR-1284                 | 1 |
| <i>circFOXN2</i> | miR-1289                 | 2 |
| <i>circFOXN2</i> | miR-129-3p               | 1 |
| <i>circFOXN2</i> | miR-129-5p               | 2 |
| <i>circFOXN2</i> | miR-1298-3p              | 4 |
| <i>circFOXN2</i> | miR-1298-5p              | 2 |
| <i>circFOXN2</i> | miR-1299                 | 2 |

|                  |                          |   |
|------------------|--------------------------|---|
| <i>circFOXN2</i> | miR-130-3p/301-3p/454-3p | 1 |
| <i>circFOXN2</i> | miR-1304-3p              | 4 |
| <i>circFOXN2</i> | miR-133a-3p.1            | 4 |
| <i>circFOXN2</i> | miR-133a-5p              | 2 |
| <i>circFOXN2</i> | miR-134-3p               | 1 |
| <i>circFOXN2</i> | miR-1343-3p              | 2 |
| <i>circFOXN2</i> | miR-135-5p               | 3 |
| <i>circFOXN2</i> | miR-137                  | 1 |
| <i>circFOXN2</i> | miR-138-5p               | 2 |
| <i>circFOXN2</i> | miR-141-5p               | 2 |
| <i>circFOXN2</i> | miR-143-5p               | 3 |
| <i>circFOXN2</i> | miR-1468-3p              | 2 |
| <i>circFOXN2</i> | miR-149-5p               | 2 |
| <i>circFOXN2</i> | miR-152-5p               | 4 |
| <i>circFOXN2</i> | miR-15a-3p               | 2 |
| <i>circFOXN2</i> | miR-15b-3p               | 1 |
| <i>circFOXN2</i> | miR-16-1-3p              | 1 |
| <i>circFOXN2</i> | miR-181-3p/4420          | 2 |
| <i>circFOXN2</i> | miR-183-5p.1             | 2 |
| <i>circFOXN2</i> | miR-183-5p.2             | 2 |
| <i>circFOXN2</i> | miR-185-5p               | 2 |
| <i>circFOXN2</i> | miR-19-3p                | 1 |
| <i>circFOXN2</i> | miR-1909-5p              | 3 |
| <i>circFOXN2</i> | miR-193-3p               | 1 |
| <i>circFOXN2</i> | miR-193b-5p              | 3 |
| <i>circFOXN2</i> | miR-1976                 | 2 |
| <i>circFOXN2</i> | miR-198                  | 2 |
| <i>circFOXN2</i> | miR-199-3p               | 3 |
| <i>circFOXN2</i> | miR-208-5p               | 1 |
| <i>circFOXN2</i> | miR-20a-3p               | 1 |
| <i>circFOXN2</i> | miR-2113                 | 4 |
| <i>circFOXN2</i> | miR-2115-3p              | 1 |
| <i>circFOXN2</i> | miR-2115-5p              | 2 |
| <i>circFOXN2</i> | miR-214-3p/3619-5p       | 1 |
| <i>circFOXN2</i> | miR-214-5p               | 2 |
| <i>circFOXN2</i> | miR-217                  | 1 |
| <i>circFOXN2</i> | miR-221-5p/8073          | 2 |
| <i>circFOXN2</i> | miR-224-5p               | 1 |

|                  |                      |   |
|------------------|----------------------|---|
| <i>circFOXN2</i> | miR-2276-3p          | 3 |
| <i>circFOXN2</i> | miR-2276-5p          | 3 |
| <i>circFOXN2</i> | miR-2467-5p          | 2 |
| <i>circFOXN2</i> | miR-26-5p            | 2 |
| <i>circFOXN2</i> | miR-27a-5p           | 2 |
| <i>circFOXN2</i> | miR-28-3p            | 2 |
| <i>circFOXN2</i> | miR-299-5p           | 2 |
| <i>circFOXN2</i> | miR-29a-5p           | 2 |
| <i>circFOXN2</i> | miR-29b-2-5p         | 1 |
| <i>circFOXN2</i> | miR-30-3p            | 4 |
| <i>circFOXN2</i> | miR-302c-3p.2/520-3p | 4 |
| <i>circFOXN2</i> | miR-3064-3p          | 2 |
| <i>circFOXN2</i> | miR-3065-3p          | 1 |
| <i>circFOXN2</i> | miR-3074-3p          | 1 |
| <i>circFOXN2</i> | miR-31-5p            | 2 |
| <i>circFOXN2</i> | miR-3115             | 2 |
| <i>circFOXN2</i> | miR-3119             | 2 |
| <i>circFOXN2</i> | miR-3124-3p          | 2 |
| <i>circFOXN2</i> | miR-3126-3p          | 4 |
| <i>circFOXN2</i> | miR-3127-5p          | 2 |
| <i>circFOXN2</i> | miR-3128             | 3 |
| <i>circFOXN2</i> | miR-3148             | 2 |
| <i>circFOXN2</i> | miR-3157-5p          | 1 |
| <i>circFOXN2</i> | miR-3160-5p          | 2 |
| <i>circFOXN2</i> | miR-3170/6855-5p     | 2 |
| <i>circFOXN2</i> | miR-3173-3p/6891-5p  | 2 |
| <i>circFOXN2</i> | miR-3180-5p          | 2 |
| <i>circFOXN2</i> | miR-3187-3p          | 2 |
| <i>circFOXN2</i> | miR-3188             | 2 |
| <i>circFOXN2</i> | miR-3193             | 2 |
| <i>circFOXN2</i> | miR-3198/4309        | 2 |
| <i>circFOXN2</i> | miR-32-3p            | 1 |
| <i>circFOXN2</i> | miR-3200-5p          | 1 |
| <i>circFOXN2</i> | miR-320e             | 2 |
| <i>circFOXN2</i> | miR-323b-3p          | 1 |
| <i>circFOXN2</i> | miR-329-5p           | 2 |
| <i>circFOXN2</i> | miR-335-3p           | 2 |
| <i>circFOXN2</i> | miR-338-3p           | 1 |

|                  |                       |   |
|------------------|-----------------------|---|
| <i>circFOXN2</i> | miR-340-5p            | 4 |
| <i>circFOXN2</i> | miR-345-5p            | 2 |
| <i>circFOXN2</i> | miR-3591-5p           | 2 |
| <i>circFOXN2</i> | miR-3607-3p           | 2 |
| <i>circFOXN2</i> | miR-3614-5p           | 1 |
| <i>circFOXN2</i> | miR-3620-3p           | 2 |
| <i>circFOXN2</i> | miR-3622a-3p/3622b-3p | 2 |
| <i>circFOXN2</i> | miR-3646              | 2 |
| <i>circFOXN2</i> | miR-3653-5p           | 2 |
| <i>circFOXN2</i> | miR-3654              | 2 |
| <i>circFOXN2</i> | miR-3662              | 2 |
| <i>circFOXN2</i> | miR-3663-5p           | 2 |
| <i>circFOXN2</i> | miR-3667-5p           | 2 |
| <i>circFOXN2</i> | miR-367-5p            | 2 |
| <i>circFOXN2</i> | miR-3675-5p           | 2 |
| <i>circFOXN2</i> | miR-3677-5p           | 2 |
| <i>circFOXN2</i> | miR-3680-5p           | 2 |
| <i>circFOXN2</i> | miR-3688-3p           | 2 |
| <i>circFOXN2</i> | miR-3692-3p           | 2 |
| <i>circFOXN2</i> | miR-3692-5p           | 2 |
| <i>circFOXN2</i> | miR-375               | 2 |
| <i>circFOXN2</i> | miR-377-5p/6086       | 2 |
| <i>circFOXN2</i> | miR-378-3p            | 2 |
| <i>circFOXN2</i> | miR-381-3p            | 2 |
| <i>circFOXN2</i> | miR-383-3p            | 1 |
| <i>circFOXN2</i> | miR-3912-5p           | 2 |
| <i>circFOXN2</i> | miR-3920              | 2 |
| <i>circFOXN2</i> | miR-3929/4419b/4478   | 2 |
| <i>circFOXN2</i> | miR-3940-5p/4507      | 4 |
| <i>circFOXN2</i> | miR-3944-5p           | 3 |
| <i>circFOXN2</i> | miR-3975              | 2 |
| <i>circFOXN2</i> | miR-3978              | 3 |
| <i>circFOXN2</i> | miR-410-3p            | 2 |
| <i>circFOXN2</i> | miR-421               | 3 |
| <i>circFOXN2</i> | miR-4261              | 1 |
| <i>circFOXN2</i> | miR-4265/4296/4322    | 1 |
| <i>circFOXN2</i> | miR-4267              | 2 |
| <i>circFOXN2</i> | miR-4268              | 2 |

|                  |                       |   |
|------------------|-----------------------|---|
| <i>circFOXN2</i> | miR-4269/6715b-5p     | 4 |
| <i>circFOXN2</i> | miR-4270/4441/6754-5p | 2 |
| <i>circFOXN2</i> | miR-4274              | 2 |
| <i>circFOXN2</i> | miR-4275              | 5 |
| <i>circFOXN2</i> | miR-4277              | 2 |
| <i>circFOXN2</i> | miR-4283              | 2 |
| <i>circFOXN2</i> | miR-4286              | 1 |
| <i>circFOXN2</i> | miR-4287/4685-3p      | 2 |
| <i>circFOXN2</i> | miR-4290              | 1 |
| <i>circFOXN2</i> | miR-4291              | 1 |
| <i>circFOXN2</i> | miR-4293              | 2 |
| <i>circFOXN2</i> | miR-4294              | 2 |
| <i>circFOXN2</i> | miR-4297/5581-5p      | 2 |
| <i>circFOXN2</i> | miR-4301              | 1 |
| <i>circFOXN2</i> | miR-4303              | 1 |
| <i>circFOXN2</i> | miR-4310/7157-5p      | 2 |
| <i>circFOXN2</i> | miR-4314              | 2 |
| <i>circFOXN2</i> | miR-4328              | 1 |
| <i>circFOXN2</i> | miR-433-3p            | 2 |
| <i>circFOXN2</i> | miR-4428              | 2 |
| <i>circFOXN2</i> | miR-4432              | 2 |
| <i>circFOXN2</i> | miR-4433b-3p          | 2 |
| <i>circFOXN2</i> | miR-4435              | 2 |
| <i>circFOXN2</i> | miR-4436b-5p          | 4 |
| <i>circFOXN2</i> | miR-4438              | 2 |
| <i>circFOXN2</i> | miR-4446-5p           | 1 |
| <i>circFOXN2</i> | miR-4448              | 2 |
| <i>circFOXN2</i> | miR-4464/4748         | 2 |
| <i>circFOXN2</i> | miR-4469              | 2 |
| <i>circFOXN2</i> | miR-4470              | 2 |
| <i>circFOXN2</i> | miR-4473              | 2 |
| <i>circFOXN2</i> | miR-4481/4745-5p      | 2 |
| <i>circFOXN2</i> | miR-4489              | 2 |
| <i>circFOXN2</i> | miR-4490              | 2 |
| <i>circFOXN2</i> | miR-4494              | 1 |
| <i>circFOXN2</i> | miR-449b-3p           | 2 |
| <i>circFOXN2</i> | miR-4509              | 2 |
| <i>circFOXN2</i> | miR-4514/4692         | 4 |

|                  |                          |   |
|------------------|--------------------------|---|
| <i>circFOXN2</i> | miR-4517                 | 2 |
| <i>circFOXN2</i> | miR-4519                 | 2 |
| <i>circFOXN2</i> | miR-452-3p               | 4 |
| <i>circFOXN2</i> | miR-4524-5p              | 1 |
| <i>circFOXN2</i> | miR-4529-5p              | 2 |
| <i>circFOXN2</i> | miR-4530                 | 1 |
| <i>circFOXN2</i> | miR-4531                 | 3 |
| <i>circFOXN2</i> | miR-4535                 | 2 |
| <i>circFOXN2</i> | miR-455-3p.2             | 3 |
| <i>circFOXN2</i> | miR-4637                 | 2 |
| <i>circFOXN2</i> | miR-4638-3p              | 2 |
| <i>circFOXN2</i> | miR-4639-5p              | 1 |
| <i>circFOXN2</i> | miR-4645-3p              | 1 |
| <i>circFOXN2</i> | miR-4652-3p              | 1 |
| <i>circFOXN2</i> | miR-4658/6790-5p         | 1 |
| <i>circFOXN2</i> | miR-4659a-3p/4659b-3p    | 3 |
| <i>circFOXN2</i> | miR-4659a-5p/4659b-5p    | 2 |
| <i>circFOXN2</i> | miR-4662-5p              | 2 |
| <i>circFOXN2</i> | miR-4665-3p              | 2 |
| <i>circFOXN2</i> | miR-4666a-3p             | 2 |
| <i>circFOXN2</i> | miR-4667-5p/4700-5p/8089 | 2 |
| <i>circFOXN2</i> | miR-4670-3p              | 2 |
| <i>circFOXN2</i> | miR-4671-3p              | 2 |
| <i>circFOXN2</i> | miR-4682                 | 1 |
| <i>circFOXN2</i> | miR-4684-5p              | 1 |
| <i>circFOXN2</i> | miR-4686                 | 2 |
| <i>circFOXN2</i> | miR-4687-5p              | 1 |
| <i>circFOXN2</i> | miR-4690-3p/5685         | 1 |
| <i>circFOXN2</i> | miR-4693-3p              | 2 |
| <i>circFOXN2</i> | miR-4694-3p              | 2 |
| <i>circFOXN2</i> | miR-4698                 | 2 |
| <i>circFOXN2</i> | miR-4699-5p              | 3 |
| <i>circFOXN2</i> | miR-4704-3p              | 1 |
| <i>circFOXN2</i> | miR-4709-5p              | 2 |
| <i>circFOXN2</i> | miR-4711-5p              | 2 |
| <i>circFOXN2</i> | miR-4712-3p              | 2 |
| <i>circFOXN2</i> | miR-4713-5p              | 2 |
| <i>circFOXN2</i> | miR-4720-3p              | 3 |

|                  |                             |   |
|------------------|-----------------------------|---|
| <i>circFOXN2</i> | miR-4720-5p/4799-3p/5588-5p | 3 |
| <i>circFOXN2</i> | miR-4725-5p                 | 2 |
| <i>circFOXN2</i> | miR-4729                    | 4 |
| <i>circFOXN2</i> | miR-4735-5p                 | 1 |
| <i>circFOXN2</i> | miR-4738-3p                 | 1 |
| <i>circFOXN2</i> | miR-4742-5p                 | 4 |
| <i>circFOXN2</i> | miR-4743-3p                 | 1 |
| <i>circFOXN2</i> | miR-4744                    | 2 |
| <i>circFOXN2</i> | miR-4753-3p                 | 2 |
| <i>circFOXN2</i> | miR-4762-3p                 | 2 |
| <i>circFOXN2</i> | miR-4766-3p                 | 4 |
| <i>circFOXN2</i> | miR-4766-5p                 | 2 |
| <i>circFOXN2</i> | miR-4772-3p                 | 3 |
| <i>circFOXN2</i> | miR-4774-5p                 | 2 |
| <i>circFOXN2</i> | miR-4776-3p                 | 2 |
| <i>circFOXN2</i> | miR-4776-5p                 | 2 |
| <i>circFOXN2</i> | miR-4777-5p                 | 1 |
| <i>circFOXN2</i> | miR-4778-3p                 | 3 |
| <i>circFOXN2</i> | miR-4782-5p/5706            | 2 |
| <i>circFOXN2</i> | miR-4786-3p                 | 2 |
| <i>circFOXN2</i> | miR-4796-3p                 | 2 |
| <i>circFOXN2</i> | miR-4798-3p                 | 2 |
| <i>circFOXN2</i> | miR-4802-5p                 | 1 |
| <i>circFOXN2</i> | miR-4804-3p                 | 3 |
| <i>circFOXN2</i> | miR-485-5p                  | 2 |
| <i>circFOXN2</i> | miR-486-5p                  | 1 |
| <i>circFOXN2</i> | miR-487-3p                  | 1 |
| <i>circFOXN2</i> | miR-493-5p                  | 1 |
| <i>circFOXN2</i> | miR-496.1                   | 2 |
| <i>circFOXN2</i> | miR-498                     | 2 |
| <i>circFOXN2</i> | miR-499a-3p/499b-3p         | 2 |
| <i>circFOXN2</i> | miR-499b-5p                 | 1 |
| <i>circFOXN2</i> | miR-5000-5p                 | 4 |
| <i>circFOXN2</i> | miR-5002-5p                 | 2 |
| <i>circFOXN2</i> | miR-5003-3p                 | 1 |
| <i>circFOXN2</i> | miR-5009-5p/8058            | 2 |
| <i>circFOXN2</i> | miR-500a-5p                 | 2 |
| <i>circFOXN2</i> | miR-5010-3p                 | 4 |



|                  |                                      |   |
|------------------|--------------------------------------|---|
| <i>circFOXN2</i> | miR-505-3p.2                         | 3 |
| <i>circFOXN2</i> | miR-506-5p                           | 2 |
| <i>circFOXN2</i> | miR-509-3-5p/509-5p/4418             | 1 |
| <i>circFOXN2</i> | miR-512-3p                           | 4 |
| <i>circFOXN2</i> | miR-513a-3p/513c-3p/3606-3p          | 2 |
| <i>circFOXN2</i> | miR-514a-3p                          | 4 |
| <i>circFOXN2</i> | miR-516a-3p/516b-3p/7162-5p          | 2 |
| <i>circFOXN2</i> | miR-516b-5p                          | 2 |
| <i>circFOXN2</i> | miR-5189-3p                          | 1 |
| <i>circFOXN2</i> | miR-518d-5p/519-5p                   | 1 |
| <i>circFOXN2</i> | miR-5190                             | 1 |
| <i>circFOXN2</i> | miR-5192                             | 2 |
| <i>circFOXN2</i> | miR-5197-3p                          | 4 |
| <i>circFOXN2</i> | miR-5197-5p                          | 2 |
| <i>circFOXN2</i> | miR-520g-5p                          | 2 |
| <i>circFOXN2</i> | miR-522-3p                           | 2 |
| <i>circFOXN2</i> | miR-525-5p                           | 2 |
| <i>circFOXN2</i> | miR-539-3p                           | 3 |
| <i>circFOXN2</i> | miR-543                              | 4 |
| <i>circFOXN2</i> | miR-545-3p                           | 3 |
| <i>circFOXN2</i> | miR-548aj-5p/548f-5p/548g-5p/548x-5p | 2 |
| <i>circFOXN2</i> | miR-548ao-3p                         | 2 |
| <i>circFOXN2</i> | miR-548ao-5p/548ax                   | 1 |
| <i>circFOXN2</i> | miR-548p                             | 2 |
| <i>circFOXN2</i> | miR-548s                             | 2 |
| <i>circFOXN2</i> | miR-5571-5p                          | 2 |
| <i>circFOXN2</i> | miR-5581-3p                          | 1 |
| <i>circFOXN2</i> | miR-5583-3p                          | 2 |
| <i>circFOXN2</i> | miR-5585-5p                          | 1 |
| <i>circFOXN2</i> | miR-5586-3p                          | 4 |
| <i>circFOXN2</i> | miR-5586-5p                          | 2 |
| <i>circFOXN2</i> | miR-5589-3p                          | 2 |
| <i>circFOXN2</i> | miR-5590-5p                          | 2 |
| <i>circFOXN2</i> | miR-5683                             | 2 |
| <i>circFOXN2</i> | miR-5690                             | 2 |
| <i>circFOXN2</i> | miR-570-3p                           | 2 |
| <i>circFOXN2</i> | miR-5702                             | 2 |
| <i>circFOXN2</i> | miR-573/3616-5p                      | 4 |

|                  |                  |   |
|------------------|------------------|---|
| <i>circFOXN2</i> | miR-575/4676-5p  | 2 |
| <i>circFOXN2</i> | miR-580-3p       | 2 |
| <i>circFOXN2</i> | miR-582-3p       | 1 |
| <i>circFOXN2</i> | miR-582-5p       | 2 |
| <i>circFOXN2</i> | miR-588          | 2 |
| <i>circFOXN2</i> | miR-590-3p       | 1 |
| <i>circFOXN2</i> | miR-593-3p       | 1 |
| <i>circFOXN2</i> | miR-596          | 2 |
| <i>circFOXN2</i> | miR-597-3p       | 4 |
| <i>circFOXN2</i> | miR-6071         | 3 |
| <i>circFOXN2</i> | miR-6077         | 2 |
| <i>circFOXN2</i> | miR-6079         | 2 |
| <i>circFOXN2</i> | miR-6124         | 2 |
| <i>circFOXN2</i> | miR-6131         | 2 |
| <i>circFOXN2</i> | miR-616-3p       | 2 |
| <i>circFOXN2</i> | miR-622          | 1 |
| <i>circFOXN2</i> | miR-625-3p       | 1 |
| <i>circFOXN2</i> | miR-627-3p       | 4 |
| <i>circFOXN2</i> | miR-628-5p       | 3 |
| <i>circFOXN2</i> | miR-629-5p       | 3 |
| <i>circFOXN2</i> | miR-634          | 1 |
| <i>circFOXN2</i> | miR-636          | 2 |
| <i>circFOXN2</i> | miR-637          | 2 |
| <i>circFOXN2</i> | miR-639          | 2 |
| <i>circFOXN2</i> | miR-642a-5p      | 2 |
| <i>circFOXN2</i> | miR-643          | 1 |
| <i>circFOXN2</i> | miR-6500-3p      | 1 |
| <i>circFOXN2</i> | miR-6503-3p      | 2 |
| <i>circFOXN2</i> | miR-6508-5p/8067 | 1 |
| <i>circFOXN2</i> | miR-6509-3p      | 4 |
| <i>circFOXN2</i> | miR-6514-5p      | 1 |
| <i>circFOXN2</i> | miR-653-3p       | 2 |
| <i>circFOXN2</i> | miR-655-5p       | 2 |
| <i>circFOXN2</i> | miR-659-3p       | 1 |
| <i>circFOXN2</i> | miR-660-5p       | 1 |
| <i>circFOXN2</i> | miR-661          | 3 |
| <i>circFOXN2</i> | miR-663b         | 2 |
| <i>circFOXN2</i> | miR-664a-5p/4794 | 2 |

|                  |                             |   |
|------------------|-----------------------------|---|
| <i>circFOXN2</i> | miR-6720-5p                 | 4 |
| <i>circFOXN2</i> | miR-6728-3p                 | 1 |
| <i>circFOXN2</i> | miR-6735-3p                 | 2 |
| <i>circFOXN2</i> | miR-6736-3p                 | 4 |
| <i>circFOXN2</i> | miR-6737-5p/6812-5p/6819-5p | 2 |
| <i>circFOXN2</i> | miR-6740-5p                 | 1 |
| <i>circFOXN2</i> | miR-6742-3p                 | 2 |
| <i>circFOXN2</i> | miR-6748-5p                 | 1 |
| <i>circFOXN2</i> | miR-6751-5p/6803-5p         | 2 |
| <i>circFOXN2</i> | miR-6759-5p                 | 1 |
| <i>circFOXN2</i> | miR-6760-3p                 | 2 |
| <i>circFOXN2</i> | miR-6765-3p                 | 2 |
| <i>circFOXN2</i> | miR-6770-5p                 | 2 |
| <i>circFOXN2</i> | miR-6776-3p                 | 1 |
| <i>circFOXN2</i> | miR-6776-5p                 | 2 |
| <i>circFOXN2</i> | miR-6779-3p                 | 1 |
| <i>circFOXN2</i> | miR-6793-5p                 | 1 |
| <i>circFOXN2</i> | miR-6796-5p                 | 1 |
| <i>circFOXN2</i> | miR-6798-3p                 | 1 |
| <i>circFOXN2</i> | miR-6809-5p                 | 2 |
| <i>circFOXN2</i> | miR-6811-3p                 | 2 |
| <i>circFOXN2</i> | miR-6815-3p                 | 3 |
| <i>circFOXN2</i> | miR-6817-3p                 | 2 |
| <i>circFOXN2</i> | miR-6825-3p                 | 2 |
| <i>circFOXN2</i> | miR-6828-3p                 | 3 |
| <i>circFOXN2</i> | miR-6831-3p                 | 4 |
| <i>circFOXN2</i> | miR-6839-3p                 | 4 |
| <i>circFOXN2</i> | miR-6844                    | 2 |
| <i>circFOXN2</i> | miR-6846-3p                 | 1 |
| <i>circFOXN2</i> | miR-6846-5p/6848-5p         | 2 |
| <i>circFOXN2</i> | miR-6849-3p                 | 2 |
| <i>circFOXN2</i> | miR-6852-5p                 | 2 |
| <i>circFOXN2</i> | miR-6853-3p                 | 2 |
| <i>circFOXN2</i> | miR-6858-3p                 | 2 |
| <i>circFOXN2</i> | miR-6859-3p                 | 1 |
| <i>circFOXN2</i> | miR-6861-5p                 | 2 |
| <i>circFOXN2</i> | miR-6867-3p                 | 2 |
| <i>circFOXN2</i> | miR-6868-5p                 | 3 |

|                  |             |   |
|------------------|-------------|---|
| <i>circFOXN2</i> | miR-6875-3p | 3 |
| <i>circFOXN2</i> | miR-6878-3p | 2 |
| <i>circFOXN2</i> | miR-6890-3p | 1 |
| <i>circFOXN2</i> | miR-6890-5p | 2 |
| <i>circFOXN2</i> | miR-6892-3p | 3 |
| <i>circFOXN2</i> | miR-6895-3p | 1 |
| <i>circFOXN2</i> | miR-7-5p    | 2 |
| <i>circFOXN2</i> | miR-7109-5p | 2 |
| <i>circFOXN2</i> | miR-711     | 2 |
| <i>circFOXN2</i> | miR-7110-3p | 2 |
| <i>circFOXN2</i> | miR-7112-3p | 2 |
| <i>circFOXN2</i> | miR-7113-3p | 2 |
| <i>circFOXN2</i> | miR-7114-5p | 1 |
| <i>circFOXN2</i> | miR-7150    | 2 |
| <i>circFOXN2</i> | miR-7151-5p | 1 |
| <i>circFOXN2</i> | miR-7152-3p | 2 |
| <i>circFOXN2</i> | miR-7154-5p | 2 |
| <i>circFOXN2</i> | miR-7155-5p | 2 |
| <i>circFOXN2</i> | miR-7158-5p | 2 |
| <i>circFOXN2</i> | miR-7159-5p | 3 |
| <i>circFOXN2</i> | miR-758-3p  | 3 |
| <i>circFOXN2</i> | miR-764     | 2 |
| <i>circFOXN2</i> | miR-7843-3p | 2 |
| <i>circFOXN2</i> | miR-7845-5p | 2 |
| <i>circFOXN2</i> | miR-7849-3p | 2 |
| <i>circFOXN2</i> | miR-7850-5p | 2 |
| <i>circFOXN2</i> | miR-7973    | 1 |
| <i>circFOXN2</i> | miR-8060    | 2 |
| <i>circFOXN2</i> | miR-8063    | 2 |
| <i>circFOXN2</i> | miR-8068    | 4 |
| <i>circFOXN2</i> | miR-8075    | 2 |
| <i>circFOXN2</i> | miR-8076    | 2 |
| <i>circFOXN2</i> | miR-8087    | 2 |
| <i>circFOXN2</i> | miR-873-3p  | 1 |
| <i>circFOXN2</i> | miR-885-3p  | 2 |
| <i>circFOXN2</i> | miR-889-3p  | 1 |
| <i>circFOXN2</i> | miR-889-5p  | 3 |
| <i>circFOXN2</i> | miR-892-5p  | 2 |

|                  |                               |   |
|------------------|-------------------------------|---|
| <i>circFOXN2</i> | miR-892b                      | 2 |
| <i>circFOXN2</i> | miR-922                       | 1 |
| <i>circFOXN2</i> | miR-93-3p                     | 2 |
| <i>circFOXN2</i> | miR-935                       | 2 |
| <i>circFOXN2</i> | miR-936                       | 3 |
| <i>circFOXN2</i> | miR-939-3p                    | 2 |
| <i>circFOXN2</i> | miR-944                       | 2 |
| <i>circFOXN2</i> | miR-1180-3p                   | 1 |
| <i>circFOXN2</i> | miR-1228-3p                   | 1 |
| <i>circFOXN2</i> | miR-1261                      | 1 |
| <i>circFOXN2</i> | miR-127-3p                    | 1 |
| <i>circFOXN2</i> | miR-142-5p                    | 1 |
| <i>circFOXN2</i> | miR-148-3p/152-3p             | 1 |
| <i>circFOXN2</i> | miR-1915-5p                   | 1 |
| <i>circFOXN2</i> | miR-3185                      | 1 |
| <i>circFOXN2</i> | miR-3200-3p                   | 1 |
| <i>circFOXN2</i> | miR-329-3p/362-3p             | 1 |
| <i>circFOXN2</i> | miR-33b-3p/515-3p/519e-3p     | 1 |
| <i>circFOXN2</i> | miR-3611                      | 1 |
| <i>circFOXN2</i> | miR-3690                      | 1 |
| <i>circFOXN2</i> | miR-371a-3p                   | 1 |
| <i>circFOXN2</i> | miR-371b-3p                   | 1 |
| <i>circFOXN2</i> | miR-376b-5p/376c-5p           | 1 |
| <i>circFOXN2</i> | miR-378j/6839-5p              | 1 |
| <i>circFOXN2</i> | miR-3914                      | 1 |
| <i>circFOXN2</i> | miR-3977                      | 1 |
| <i>circFOXN2</i> | miR-4254                      | 1 |
| <i>circFOXN2</i> | miR-4276                      | 1 |
| <i>circFOXN2</i> | miR-4426/4647/4662b           | 1 |
| <i>circFOXN2</i> | miR-4664-3p                   | 1 |
| <i>circFOXN2</i> | miR-4709-3p                   | 2 |
| <i>circFOXN2</i> | miR-4728-3p                   | 1 |
| <i>circFOXN2</i> | miR-509-3p                    | 1 |
| <i>circFOXN2</i> | miR-548m                      | 1 |
| <i>circFOXN2</i> | miR-550a-3-5p/550a-5p/1271-3p | 1 |
| <i>circFOXN2</i> | miR-587                       | 1 |
| <i>circFOXN2</i> | miR-603                       | 1 |
| <i>circFOXN2</i> | miR-6074                      | 1 |

|                  |                                   |   |
|------------------|-----------------------------------|---|
| <i>circFOXN2</i> | miR-6083                          | 1 |
| <i>circFOXN2</i> | miR-651-3p                        | 1 |
| <i>circFOXN2</i> | miR-6512-5p                       | 1 |
| <i>circFOXN2</i> | miR-6514-3p                       | 1 |
| <i>circFOXN2</i> | miR-656-5p                        | 1 |
| <i>circFOXN2</i> | miR-676-5p                        | 1 |
| <i>circFOXN2</i> | miR-6782-3p                       | 1 |
| <i>circFOXN2</i> | miR-6813-3p                       | 1 |
| <i>circFOXN2</i> | miR-6841-3p                       | 1 |
| <i>circFOXN2</i> | miR-6894-3p                       | 1 |
| <i>circFOXN2</i> | miR-8485                          | 1 |
| <i>circFOXN2</i> | miR-885-5p                        | 1 |
| <i>circFOXN2</i> | miR-1273e                         | 1 |
| <i>circFOXN2</i> | miR-1294                          | 1 |
| <i>circFOXN2</i> | miR-1304-5p                       | 1 |
| <i>circFOXN2</i> | miR-182-3p                        | 1 |
| <i>circFOXN2</i> | miR-186-5p                        | 1 |
| <i>circFOXN2</i> | miR-21-5p/590-5p                  | 1 |
| <i>circFOXN2</i> | miR-218-1-3p                      | 1 |
| <i>circFOXN2</i> | miR-218-2-3p                      | 1 |
| <i>circFOXN2</i> | miR-27b-5p                        | 1 |
| <i>circFOXN2</i> | miR-302a-5p                       | 1 |
| <i>circFOXN2</i> | miR-3121-3p                       | 1 |
| <i>circFOXN2</i> | miR-3133                          | 1 |
| <i>circFOXN2</i> | miR-3161                          | 1 |
| <i>circFOXN2</i> | miR-3174                          | 1 |
| <i>circFOXN2</i> | miR-3606-5p                       | 1 |
| <i>circFOXN2</i> | miR-3689a-5p/3689b-5p/3689e/3689f | 1 |
| <i>circFOXN2</i> | miR-4316                          | 1 |
| <i>circFOXN2</i> | miR-4511                          | 1 |
| <i>circFOXN2</i> | miR-4797-5p                       | 1 |
| <i>circFOXN2</i> | miR-544a                          | 1 |
| <i>circFOXN2</i> | miR-548b-3p                       | 1 |
| <i>circFOXN2</i> | miR-5705                          | 1 |
| <i>circFOXN2</i> | miR-6134                          | 1 |
| <i>circFOXN2</i> | miR-619-3p                        | 1 |
| <i>circFOXN2</i> | miR-6501-3p                       | 1 |
| <i>circFOXN2</i> | miR-6504-3p                       | 1 |

|                  |                     |   |
|------------------|---------------------|---|
| <i>circFOXN2</i> | miR-6738-3p         | 1 |
| <i>circFOXN2</i> | miR-6804-3p         | 1 |
| <i>circFOXN2</i> | miR-7851-3p         | 1 |
| <i>circFOXN2</i> | miR-7854-3p         | 1 |
| <i>circFOXN2</i> | miR-8055            | 1 |
| <i>circFOXN2</i> | miR-921             | 1 |
| <i>circFOXN2</i> | miR-3121-5p         | 1 |
| <i>circFOXN2</i> | miR-3127-3p/6756-3p | 1 |
| <i>circFOXN2</i> | miR-5195-5p         | 1 |
| <i>circFOXN2</i> | miR-6832-3p         | 1 |
| <i>circFRYL</i>  | miR-100-3p          | 1 |
| <i>circFRYL</i>  | miR-103a-2-5p       | 1 |
| <i>circFRYL</i>  | miR-1200            | 1 |
| <i>circFRYL</i>  | miR-124-5p          | 1 |
| <i>circFRYL</i>  | miR-1245a/8079      | 1 |
| <i>circFRYL</i>  | miR-1246            | 1 |
| <i>circFRYL</i>  | miR-1251-3p         | 1 |
| <i>circFRYL</i>  | miR-1255b-2-3p      | 1 |
| <i>circFRYL</i>  | miR-127-5p          | 1 |
| <i>circFRYL</i>  | miR-1279            | 1 |
| <i>circFRYL</i>  | miR-1283            | 1 |
| <i>circFRYL</i>  | miR-1288-5p         | 1 |
| <i>circFRYL</i>  | miR-1304-3p         | 2 |
| <i>circFRYL</i>  | miR-134-5p          | 1 |
| <i>circFRYL</i>  | miR-145-3p          | 1 |
| <i>circFRYL</i>  | miR-181-5p          | 1 |
| <i>circFRYL</i>  | miR-1825            | 1 |
| <i>circFRYL</i>  | miR-1909-5p         | 1 |
| <i>circFRYL</i>  | miR-197-3p          | 1 |
| <i>circFRYL</i>  | miR-199-5p          | 1 |
| <i>circFRYL</i>  | miR-214-5p          | 1 |
| <i>circFRYL</i>  | miR-224-5p          | 1 |
| <i>circFRYL</i>  | miR-2392            | 1 |
| <i>circFRYL</i>  | miR-26-5p           | 1 |
| <i>circFRYL</i>  | miR-302c-5p         | 1 |
| <i>circFRYL</i>  | miR-3074-5p         | 1 |
| <i>circFRYL</i>  | miR-3120-5p         | 1 |
| <i>circFRYL</i>  | miR-3124-3p         | 1 |

|                 |                                   |   |
|-----------------|-----------------------------------|---|
| <i>circFRYL</i> | miR-3134                          | 1 |
| <i>circFRYL</i> | miR-3140-5p                       | 1 |
| <i>circFRYL</i> | miR-3143                          | 1 |
| <i>circFRYL</i> | miR-3159                          | 1 |
| <i>circFRYL</i> | miR-3164                          | 1 |
| <i>circFRYL</i> | miR-320                           | 1 |
| <i>circFRYL</i> | miR-329-3p/362-3p                 | 1 |
| <i>circFRYL</i> | miR-335-5p                        | 1 |
| <i>circFRYL</i> | miR-33b-3p/515-3p/519e-3p         | 1 |
| <i>circFRYL</i> | miR-345-3p                        | 1 |
| <i>circFRYL</i> | miR-3607-3p                       | 1 |
| <i>circFRYL</i> | miR-3613-3p                       | 1 |
| <i>circFRYL</i> | miR-362-5p/500b-5p                | 1 |
| <i>circFRYL</i> | miR-3664-5p                       | 1 |
| <i>circFRYL</i> | miR-3680-5p                       | 2 |
| <i>circFRYL</i> | miR-3682-3p                       | 1 |
| <i>circFRYL</i> | miR-3689a-5p/3689b-5p/3689e/3689f | 1 |
| <i>circFRYL</i> | miR-3691-3p                       | 1 |
| <i>circFRYL</i> | miR-371a-3p                       | 1 |
| <i>circFRYL</i> | miR-371b-3p                       | 1 |
| <i>circFRYL</i> | miR-376-3p                        | 1 |
| <i>circFRYL</i> | miR-377-3p                        | 1 |
| <i>circFRYL</i> | miR-378a-5p                       | 1 |
| <i>circFRYL</i> | miR-383-5p.2                      | 1 |
| <i>circFRYL</i> | miR-3925-3p                       | 1 |
| <i>circFRYL</i> | miR-3977                          | 1 |
| <i>circFRYL</i> | miR-412-3p/6754-3p                | 1 |
| <i>circFRYL</i> | miR-421                           | 1 |
| <i>circFRYL</i> | miR-4301                          | 1 |
| <i>circFRYL</i> | miR-4302                          | 1 |
| <i>circFRYL</i> | miR-432-3p                        | 1 |
| <i>circFRYL</i> | miR-432-5p                        | 1 |
| <i>circFRYL</i> | miR-433-5p                        | 1 |
| <i>circFRYL</i> | miR-4444                          | 1 |
| <i>circFRYL</i> | miR-4534/8082                     | 1 |
| <i>circFRYL</i> | miR-4693-5p                       | 1 |
| <i>circFRYL</i> | miR-4711-3p                       | 1 |
| <i>circFRYL</i> | miR-4714-5p                       | 1 |



|                 |                                                                    |   |
|-----------------|--------------------------------------------------------------------|---|
| <i>circFRYL</i> | miR-4720-3p                                                        | 1 |
| <i>circFRYL</i> | miR-4729                                                           | 1 |
| <i>circFRYL</i> | miR-4760-5p/8061                                                   | 1 |
| <i>circFRYL</i> | miR-4766-5p                                                        | 1 |
| <i>circFRYL</i> | miR-4773                                                           | 1 |
| <i>circFRYL</i> | miR-4777-5p                                                        | 1 |
| <i>circFRYL</i> | miR-4778-5p                                                        | 1 |
| <i>circFRYL</i> | miR-4786-3p                                                        | 1 |
| <i>circFRYL</i> | miR-4798-3p                                                        | 2 |
| <i>circFRYL</i> | miR-4799-5p                                                        | 1 |
| <i>circFRYL</i> | miR-4804-3p                                                        | 1 |
| <i>circFRYL</i> | miR-486-5p                                                         | 1 |
| <i>circFRYL</i> | miR-487a-5p/487b-5p                                                | 1 |
| <i>circFRYL</i> | miR-488-5p                                                         | 1 |
| <i>circFRYL</i> | miR-4999-3p                                                        | 1 |
| <i>circFRYL</i> | miR-5004-3p                                                        | 1 |
| <i>circFRYL</i> | miR-5007-5p                                                        | 1 |
| <i>circFRYL</i> | miR-5008-3p/6737-3p/7157-3p                                        | 1 |
| <i>circFRYL</i> | miR-501-5p                                                         | 1 |
| <i>circFRYL</i> | miR-505-3p.2                                                       | 1 |
| <i>circFRYL</i> | miR-511-5p                                                         | 1 |
| <i>circFRYL</i> | miR-513c-5p/514b-5p                                                | 1 |
| <i>circFRYL</i> | miR-514a-5p                                                        | 1 |
| <i>circFRYL</i> | miR-518d-5p/519-5p                                                 | 1 |
| <i>circFRYL</i> | miR-524-5p                                                         | 1 |
| <i>circFRYL</i> | miR-525-5p                                                         | 1 |
| <i>circFRYL</i> | miR-543                                                            | 1 |
| <i>circFRYL</i> | miR-544a                                                           | 1 |
| <i>circFRYL</i> | miR-545-3p                                                         | 1 |
| <i>circFRYL</i> | miR-548av-5p/548k/8054                                             | 1 |
| <i>circFRYL</i> | miR-548ay-5p/548au-5p/548as-5p/548ar-5p/548aq-5p/548ap-5p/548am-5p | 1 |
| <i>circFRYL</i> | miR-548e-5p                                                        | 1 |
| <i>circFRYL</i> | miR-548g-3p                                                        | 1 |
| <i>circFRYL</i> | miR-548l                                                           | 1 |
| <i>circFRYL</i> | miR-550a-3-5p/550a-5p/1271-3p                                      | 2 |
| <i>circFRYL</i> | miR-550b-2-5p                                                      | 2 |
| <i>circFRYL</i> | miR-5680                                                           | 1 |
| <i>circFRYL</i> | miR-5687                                                           | 1 |

|                 |                  |   |
|-----------------|------------------|---|
| <i>circFRYL</i> | miR-5694         | 1 |
| <i>circFRYL</i> | miR-5702         | 1 |
| <i>circFRYL</i> | miR-587          | 1 |
| <i>circFRYL</i> | miR-598-5p       | 1 |
| <i>circFRYL</i> | miR-602          | 1 |
| <i>circFRYL</i> | miR-603          | 1 |
| <i>circFRYL</i> | miR-6071         | 1 |
| <i>circFRYL</i> | miR-6074         | 1 |
| <i>circFRYL</i> | miR-618          | 1 |
| <i>circFRYL</i> | miR-627-3p       | 1 |
| <i>circFRYL</i> | miR-640          | 1 |
| <i>circFRYL</i> | miR-648          | 1 |
| <i>circFRYL</i> | miR-6508-5p/8067 | 1 |
| <i>circFRYL</i> | miR-6513-3p      | 1 |
| <i>circFRYL</i> | miR-6514-3p      | 1 |
| <i>circFRYL</i> | miR-653-5p       | 1 |
| <i>circFRYL</i> | miR-6733-3p      | 1 |
| <i>circFRYL</i> | miR-6738-3p      | 1 |
| <i>circFRYL</i> | miR-6776-3p      | 1 |
| <i>circFRYL</i> | miR-6777-3p      | 2 |
| <i>circFRYL</i> | miR-6794-3p      | 1 |
| <i>circFRYL</i> | miR-6796-3p      | 1 |
| <i>circFRYL</i> | miR-6811-3p      | 1 |
| <i>circFRYL</i> | miR-6818-3p      | 1 |
| <i>circFRYL</i> | miR-6828-3p      | 1 |
| <i>circFRYL</i> | miR-6830-3p      | 1 |
| <i>circFRYL</i> | miR-6836-3p      | 1 |
| <i>circFRYL</i> | miR-6837-3p      | 1 |
| <i>circFRYL</i> | miR-6879-3p      | 1 |
| <i>circFRYL</i> | miR-6889-3p      | 1 |
| <i>circFRYL</i> | miR-6894-3p      | 1 |
| <i>circFRYL</i> | miR-7152-5p      | 1 |
| <i>circFRYL</i> | miR-7159-5p      | 1 |
| <i>circFRYL</i> | miR-766-3p       | 1 |
| <i>circFRYL</i> | miR-7843-3p      | 1 |
| <i>circFRYL</i> | miR-7848-3p      | 1 |
| <i>circFRYL</i> | miR-8062         | 1 |
| <i>circFRYL</i> | miR-8069         | 1 |

|                  |                          |   |
|------------------|--------------------------|---|
| <i>circFRYL</i>  | miR-8485                 | 1 |
| <i>circFRYL</i>  | miR-888-5p               | 1 |
| <i>circFRYL</i>  | miR-890                  | 1 |
| <i>circFRYL</i>  | miR-99-3p                | 1 |
| <i>circFSIP1</i> | let-7-5p/98-5p           | 1 |
| <i>circFSIP1</i> | miR-1-5p                 | 2 |
| <i>circFSIP1</i> | miR-103a-2-5p            | 1 |
| <i>circFSIP1</i> | miR-1180-3p              | 1 |
| <i>circFSIP1</i> | miR-1183                 | 1 |
| <i>circFSIP1</i> | miR-1184                 | 1 |
| <i>circFSIP1</i> | miR-1205                 | 1 |
| <i>circFSIP1</i> | miR-1208                 | 1 |
| <i>circFSIP1</i> | miR-1224-5p              | 2 |
| <i>circFSIP1</i> | miR-1225-3p              | 1 |
| <i>circFSIP1</i> | miR-1229-3p              | 1 |
| <i>circFSIP1</i> | miR-1236-5p              | 1 |
| <i>circFSIP1</i> | miR-1237-3p              | 2 |
| <i>circFSIP1</i> | miR-1238-3p              | 1 |
| <i>circFSIP1</i> | miR-1243                 | 1 |
| <i>circFSIP1</i> | miR-1245b-3p             | 1 |
| <i>circFSIP1</i> | miR-1248                 | 2 |
| <i>circFSIP1</i> | miR-1252-3p              | 3 |
| <i>circFSIP1</i> | miR-1252-5p              | 2 |
| <i>circFSIP1</i> | miR-1253                 | 1 |
| <i>circFSIP1</i> | miR-1255a/1255b-5p       | 2 |
| <i>circFSIP1</i> | miR-1256                 | 1 |
| <i>circFSIP1</i> | miR-126-5p               | 1 |
| <i>circFSIP1</i> | miR-1262/4701-3p/6736-5p | 2 |
| <i>circFSIP1</i> | miR-1266-5p/4518         | 1 |
| <i>circFSIP1</i> | miR-127-5p               | 2 |
| <i>circFSIP1</i> | miR-1272                 | 1 |
| <i>circFSIP1</i> | miR-1273d                | 2 |
| <i>circFSIP1</i> | miR-1273e                | 1 |
| <i>circFSIP1</i> | miR-1273g-3p             | 1 |
| <i>circFSIP1</i> | miR-1273g-5p             | 1 |
| <i>circFSIP1</i> | miR-1273h-3p             | 2 |
| <i>circFSIP1</i> | miR-1276                 | 2 |
| <i>circFSIP1</i> | miR-1283                 | 1 |

|                  |                                      |   |
|------------------|--------------------------------------|---|
| <i>circFSIP1</i> | miR-1285-5p                          | 1 |
| <i>circFSIP1</i> | miR-1290                             | 1 |
| <i>circFSIP1</i> | miR-1291/6775-3p                     | 1 |
| <i>circFSIP1</i> | miR-1293/4483                        | 1 |
| <i>circFSIP1</i> | miR-1295b-5p/1912                    | 2 |
| <i>circFSIP1</i> | miR-1299                             | 1 |
| <i>circFSIP1</i> | miR-1301-3p                          | 1 |
| <i>circFSIP1</i> | miR-1303                             | 1 |
| <i>circFSIP1</i> | miR-1304-3p                          | 1 |
| <i>circFSIP1</i> | miR-1304-5p                          | 2 |
| <i>circFSIP1</i> | miR-1306-3p                          | 2 |
| <i>circFSIP1</i> | miR-132-3p/212-3p                    | 1 |
| <i>circFSIP1</i> | miR-1322                             | 1 |
| <i>circFSIP1</i> | miR-1323                             | 1 |
| <i>circFSIP1</i> | miR-133a-3p.1                        | 1 |
| <i>circFSIP1</i> | miR-133a-5p                          | 1 |
| <i>circFSIP1</i> | miR-134-3p                           | 1 |
| <i>circFSIP1</i> | miR-138-1-3p                         | 1 |
| <i>circFSIP1</i> | miR-138-2-3p                         | 1 |
| <i>circFSIP1</i> | miR-138-5p                           | 1 |
| <i>circFSIP1</i> | miR-140-5p                           | 1 |
| <i>circFSIP1</i> | miR-143-5p                           | 1 |
| <i>circFSIP1</i> | miR-145-5p                           | 2 |
| <i>circFSIP1</i> | miR-1468-3p                          | 1 |
| <i>circFSIP1</i> | miR-146a-3p                          | 1 |
| <i>circFSIP1</i> | miR-1470                             | 2 |
| <i>circFSIP1</i> | miR-148b-5p/6874-3p                  | 2 |
| <i>circFSIP1</i> | miR-149-5p                           | 1 |
| <i>circFSIP1</i> | miR-15-5p/16-5p/195-5p/424-5p/497-5p | 1 |
| <i>circFSIP1</i> | miR-153-3p                           | 2 |
| <i>circFSIP1</i> | miR-15b-3p                           | 2 |
| <i>circFSIP1</i> | miR-17-3p                            | 1 |
| <i>circFSIP1</i> | miR-17-5p/20-5p/93-5p/106-5p/519-3p  | 2 |
| <i>circFSIP1</i> | miR-181-3p/4420                      | 1 |
| <i>circFSIP1</i> | miR-182-5p                           | 2 |
| <i>circFSIP1</i> | miR-1825                             | 1 |
| <i>circFSIP1</i> | miR-185-3p                           | 1 |
| <i>circFSIP1</i> | miR-186-5p                           | 7 |

|                  |                                              |   |
|------------------|----------------------------------------------|---|
| <i>circFSIP1</i> | miR-187-5p                                   | 1 |
| <i>circFSIP1</i> | miR-188-5p                                   | 1 |
| <i>circFSIP1</i> | miR-190-5p                                   | 2 |
| <i>circFSIP1</i> | miR-1914-5p                                  | 2 |
| <i>circFSIP1</i> | miR-194-3p                                   | 1 |
| <i>circFSIP1</i> | miR-194-5p                                   | 1 |
| <i>circFSIP1</i> | miR-196-5p                                   | 1 |
| <i>circFSIP1</i> | miR-198                                      | 1 |
| <i>circFSIP1</i> | miR-199-5p                                   | 1 |
| <i>circFSIP1</i> | miR-203a-3p.1                                | 4 |
| <i>circFSIP1</i> | miR-203a-5p                                  | 1 |
| <i>circFSIP1</i> | miR-203b-3p                                  | 1 |
| <i>circFSIP1</i> | miR-203b-5p/6718-5p                          | 1 |
| <i>circFSIP1</i> | miR-205-5p                                   | 1 |
| <i>circFSIP1</i> | miR-208-5p                                   | 2 |
| <i>circFSIP1</i> | miR-20a-3p                                   | 1 |
| <i>circFSIP1</i> | miR-21-3p/3591-3p                            | 2 |
| <i>circFSIP1</i> | miR-2114-3p                                  | 1 |
| <i>circFSIP1</i> | miR-2115-3p                                  | 2 |
| <i>circFSIP1</i> | miR-2117                                     | 1 |
| <i>circFSIP1</i> | miR-214-3p/3619-5p                           | 1 |
| <i>circFSIP1</i> | miR-2278                                     | 1 |
| <i>circFSIP1</i> | miR-2392                                     | 2 |
| <i>circFSIP1</i> | miR-2467-3p                                  | 1 |
| <i>circFSIP1</i> | miR-2681-3p                                  | 1 |
| <i>circFSIP1</i> | miR-2681-5p                                  | 1 |
| <i>circFSIP1</i> | miR-27b-5p                                   | 1 |
| <i>circFSIP1</i> | miR-297                                      | 1 |
| <i>circFSIP1</i> | miR-299-3p                                   | 2 |
| <i>circFSIP1</i> | miR-29b-1-5p                                 | 1 |
| <i>circFSIP1</i> | miR-30-5p                                    | 1 |
| <i>circFSIP1</i> | miR-301a-5p/301b-5p                          | 1 |
| <i>circFSIP1</i> | miR-302a-5p                                  | 1 |
| <i>circFSIP1</i> | miR-302f                                     | 1 |
| <i>circFSIP1</i> | miR-30b-3p/1273h-5p/3689-3p/6779-5p/6780a-5p | 1 |
| <i>circFSIP1</i> | miR-30c-3p/6788-5p                           | 1 |
| <i>circFSIP1</i> | miR-3122/3913-5p                             | 1 |
| <i>circFSIP1</i> | miR-3123                                     | 4 |

|                  |                     |   |
|------------------|---------------------|---|
| <i>circFSIP1</i> | miR-3124-3p         | 1 |
| <i>circFSIP1</i> | miR-3127-5p         | 1 |
| <i>circFSIP1</i> | miR-3130-5p/4482-5p | 2 |
| <i>circFSIP1</i> | miR-3133            | 7 |
| <i>circFSIP1</i> | miR-3136-5p/4439    | 1 |
| <i>circFSIP1</i> | miR-3140-3p         | 1 |
| <i>circFSIP1</i> | miR-3143            | 1 |
| <i>circFSIP1</i> | miR-3145-5p         | 2 |
| <i>circFSIP1</i> | miR-3148            | 2 |
| <i>circFSIP1</i> | miR-3150b-3p        | 2 |
| <i>circFSIP1</i> | miR-3158-5p         | 1 |
| <i>circFSIP1</i> | miR-3159            | 1 |
| <i>circFSIP1</i> | miR-3160-5p         | 1 |
| <i>circFSIP1</i> | miR-3162-3p         | 1 |
| <i>circFSIP1</i> | miR-3163            | 2 |
| <i>circFSIP1</i> | miR-3168            | 2 |
| <i>circFSIP1</i> | miR-3169            | 1 |
| <i>circFSIP1</i> | miR-3180-5p         | 2 |
| <i>circFSIP1</i> | miR-3182            | 1 |
| <i>circFSIP1</i> | miR-3185            | 4 |
| <i>circFSIP1</i> | miR-3187-3p         | 1 |
| <i>circFSIP1</i> | miR-3190-3p         | 1 |
| <i>circFSIP1</i> | miR-3191-5p         | 2 |
| <i>circFSIP1</i> | miR-32-3p           | 2 |
| <i>circFSIP1</i> | miR-320             | 2 |
| <i>circFSIP1</i> | miR-3200-5p         | 1 |
| <i>circFSIP1</i> | miR-3201/4791       | 1 |
| <i>circFSIP1</i> | miR-320e            | 2 |
| <i>circFSIP1</i> | miR-323a-5p         | 1 |
| <i>circFSIP1</i> | miR-338-3p          | 1 |
| <i>circFSIP1</i> | miR-338-5p          | 1 |
| <i>circFSIP1</i> | miR-340-5p          | 2 |
| <i>circFSIP1</i> | miR-34a-3p          | 1 |
| <i>circFSIP1</i> | miR-3591-5p         | 1 |
| <i>circFSIP1</i> | miR-3606-5p         | 1 |
| <i>circFSIP1</i> | miR-361-3p          | 1 |
| <i>circFSIP1</i> | miR-361-5p          | 1 |
| <i>circFSIP1</i> | miR-3610            | 2 |

|                  |                           |   |
|------------------|---------------------------|---|
| <i>circFSIP1</i> | miR-3611                  | 1 |
| <i>circFSIP1</i> | miR-3613-3p               | 1 |
| <i>circFSIP1</i> | miR-3614-3p               | 2 |
| <i>circFSIP1</i> | miR-3617-3p               | 1 |
| <i>circFSIP1</i> | miR-3622a-3p/3622b-3p     | 1 |
| <i>circFSIP1</i> | miR-363-5p/6745           | 1 |
| <i>circFSIP1</i> | miR-3646                  | 3 |
| <i>circFSIP1</i> | miR-365-3p                | 1 |
| <i>circFSIP1</i> | miR-3652/4430             | 2 |
| <i>circFSIP1</i> | miR-3654                  | 1 |
| <i>circFSIP1</i> | miR-3655                  | 1 |
| <i>circFSIP1</i> | miR-3658                  | 2 |
| <i>circFSIP1</i> | miR-3662                  | 2 |
| <i>circFSIP1</i> | miR-3664-3p               | 1 |
| <i>circFSIP1</i> | miR-3667-5p               | 1 |
| <i>circFSIP1</i> | miR-3670                  | 1 |
| <i>circFSIP1</i> | miR-3671                  | 2 |
| <i>circFSIP1</i> | miR-3675-3p               | 1 |
| <i>circFSIP1</i> | miR-3678-3p               | 2 |
| <i>circFSIP1</i> | miR-3679-3p               | 1 |
| <i>circFSIP1</i> | miR-3682-3p               | 1 |
| <i>circFSIP1</i> | miR-3688-3p               | 2 |
| <i>circFSIP1</i> | miR-371-5p                | 1 |
| <i>circFSIP1</i> | miR-371b-5p/373-5p/616-5p | 1 |
| <i>circFSIP1</i> | miR-372-5p                | 1 |
| <i>circFSIP1</i> | miR-378-3p                | 1 |
| <i>circFSIP1</i> | miR-378j/6839-5p          | 1 |
| <i>circFSIP1</i> | miR-379-5p                | 1 |
| <i>circFSIP1</i> | miR-380-5p/563            | 2 |
| <i>circFSIP1</i> | miR-381-3p                | 1 |
| <i>circFSIP1</i> | miR-382-3p                | 1 |
| <i>circFSIP1</i> | miR-383-5p.1              | 1 |
| <i>circFSIP1</i> | miR-3914                  | 1 |
| <i>circFSIP1</i> | miR-3915                  | 2 |
| <i>circFSIP1</i> | miR-3919                  | 3 |
| <i>circFSIP1</i> | miR-3921/4653-5p          | 1 |
| <i>circFSIP1</i> | miR-3925-3p               | 4 |
| <i>circFSIP1</i> | miR-3925-5p               | 4 |

|                  |                     |   |
|------------------|---------------------|---|
| <i>circFSIP1</i> | miR-3926            | 1 |
| <i>circFSIP1</i> | miR-3927-3p/6831-5p | 1 |
| <i>circFSIP1</i> | miR-3928-3p         | 2 |
| <i>circFSIP1</i> | miR-3928-5p/6806-3p | 2 |
| <i>circFSIP1</i> | miR-3929/4419b/4478 | 2 |
| <i>circFSIP1</i> | miR-3934-3p         | 1 |
| <i>circFSIP1</i> | miR-3942-3p         | 1 |
| <i>circFSIP1</i> | miR-3974            | 1 |
| <i>circFSIP1</i> | miR-3978            | 2 |
| <i>circFSIP1</i> | miR-410-3p          | 1 |
| <i>circFSIP1</i> | miR-425-5p          | 1 |
| <i>circFSIP1</i> | miR-4251            | 2 |
| <i>circFSIP1</i> | miR-4255            | 1 |
| <i>circFSIP1</i> | miR-4259            | 1 |
| <i>circFSIP1</i> | miR-4263            | 1 |
| <i>circFSIP1</i> | miR-4264            | 2 |
| <i>circFSIP1</i> | miR-4265/4296/4322  | 1 |
| <i>circFSIP1</i> | miR-4267            | 1 |
| <i>circFSIP1</i> | miR-4276            | 2 |
| <i>circFSIP1</i> | miR-4277            | 2 |
| <i>circFSIP1</i> | miR-4281            | 1 |
| <i>circFSIP1</i> | miR-4290            | 1 |
| <i>circFSIP1</i> | miR-4291            | 1 |
| <i>circFSIP1</i> | miR-4297/5581-5p    | 1 |
| <i>circFSIP1</i> | miR-4302            | 2 |
| <i>circFSIP1</i> | miR-4303            | 1 |
| <i>circFSIP1</i> | miR-4310/7157-5p    | 1 |
| <i>circFSIP1</i> | miR-4311            | 2 |
| <i>circFSIP1</i> | miR-4312            | 1 |
| <i>circFSIP1</i> | miR-432-3p          | 2 |
| <i>circFSIP1</i> | miR-432-5p          | 1 |
| <i>circFSIP1</i> | miR-4327            | 1 |
| <i>circFSIP1</i> | miR-4328            | 1 |
| <i>circFSIP1</i> | miR-4329            | 2 |
| <i>circFSIP1</i> | miR-433-3p          | 1 |
| <i>circFSIP1</i> | miR-4426/4647/4662b | 2 |
| <i>circFSIP1</i> | miR-4432            | 3 |
| <i>circFSIP1</i> | miR-4433a-3p        | 1 |



|                  |                    |   |
|------------------|--------------------|---|
| <i>circFSIP1</i> | miR-4433a-5p       | 1 |
| <i>circFSIP1</i> | miR-4434/4516/5703 | 2 |
| <i>circFSIP1</i> | miR-4435           | 1 |
| <i>circFSIP1</i> | miR-4436b-5p       | 1 |
| <i>circFSIP1</i> | miR-4437           | 1 |
| <i>circFSIP1</i> | miR-4451           | 1 |
| <i>circFSIP1</i> | miR-4453/4538      | 2 |
| <i>circFSIP1</i> | miR-4459           | 1 |
| <i>circFSIP1</i> | miR-4461           | 3 |
| <i>circFSIP1</i> | miR-4463           | 1 |
| <i>circFSIP1</i> | miR-4476/6876-5p   | 2 |
| <i>circFSIP1</i> | miR-4477a          | 2 |
| <i>circFSIP1</i> | miR-448            | 2 |
| <i>circFSIP1</i> | miR-4480           | 1 |
| <i>circFSIP1</i> | miR-4484           | 3 |
| <i>circFSIP1</i> | miR-4491/4657      | 2 |
| <i>circFSIP1</i> | miR-4496           | 3 |
| <i>circFSIP1</i> | miR-4497           | 1 |
| <i>circFSIP1</i> | miR-4499           | 1 |
| <i>circFSIP1</i> | miR-4501           | 1 |
| <i>circFSIP1</i> | miR-4504           | 1 |
| <i>circFSIP1</i> | miR-4505/5787      | 2 |
| <i>circFSIP1</i> | miR-4509           | 2 |
| <i>circFSIP1</i> | miR-450a-1-3p      | 1 |
| <i>circFSIP1</i> | miR-4511           | 2 |
| <i>circFSIP1</i> | miR-4513/6855-3p   | 1 |
| <i>circFSIP1</i> | miR-4517           | 3 |
| <i>circFSIP1</i> | miR-452-3p         | 1 |
| <i>circFSIP1</i> | miR-4520-3p        | 1 |
| <i>circFSIP1</i> | miR-4522           | 1 |
| <i>circFSIP1</i> | miR-4530           | 1 |
| <i>circFSIP1</i> | miR-455-3p.2       | 1 |
| <i>circFSIP1</i> | miR-4635           | 1 |
| <i>circFSIP1</i> | miR-4638-3p        | 1 |
| <i>circFSIP1</i> | miR-4639-5p        | 1 |
| <i>circFSIP1</i> | miR-4642           | 1 |
| <i>circFSIP1</i> | miR-4649-3p        | 1 |
| <i>circFSIP1</i> | miR-4650-3p        | 1 |

|                  |                       |   |
|------------------|-----------------------|---|
| <i>circFSIP1</i> | miR-4659a-3p/4659b-3p | 1 |
| <i>circFSIP1</i> | miR-4660              | 1 |
| <i>circFSIP1</i> | miR-4662a-3p          | 2 |
| <i>circFSIP1</i> | miR-4663              | 1 |
| <i>circFSIP1</i> | miR-4664-3p           | 1 |
| <i>circFSIP1</i> | miR-4666a-3p          | 1 |
| <i>circFSIP1</i> | miR-4667-3p           | 2 |
| <i>circFSIP1</i> | miR-4668-3p           | 2 |
| <i>circFSIP1</i> | miR-4677-3p           | 1 |
| <i>circFSIP1</i> | miR-4679              | 1 |
| <i>circFSIP1</i> | miR-4680-5p           | 1 |
| <i>circFSIP1</i> | miR-4684-5p           | 1 |
| <i>circFSIP1</i> | miR-4686              | 1 |
| <i>circFSIP1</i> | miR-4689/6858-5p      | 2 |
| <i>circFSIP1</i> | miR-4693-3p           | 1 |
| <i>circFSIP1</i> | miR-4695-5p           | 1 |
| <i>circFSIP1</i> | miR-4699-5p           | 2 |
| <i>circFSIP1</i> | miR-4704-3p           | 1 |
| <i>circFSIP1</i> | miR-4709-3p           | 2 |
| <i>circFSIP1</i> | miR-4711-3p           | 1 |
| <i>circFSIP1</i> | miR-4711-5p           | 1 |
| <i>circFSIP1</i> | miR-4712-3p           | 2 |
| <i>circFSIP1</i> | miR-4715-5p           | 1 |
| <i>circFSIP1</i> | miR-4719              | 1 |
| <i>circFSIP1</i> | miR-4724-5p           | 2 |
| <i>circFSIP1</i> | miR-4731-3p/4801      | 2 |
| <i>circFSIP1</i> | miR-4731-5p           | 1 |
| <i>circFSIP1</i> | miR-4738-3p           | 2 |
| <i>circFSIP1</i> | miR-4742-3p           | 1 |
| <i>circFSIP1</i> | miR-4744              | 2 |
| <i>circFSIP1</i> | miR-4747-3p           | 1 |
| <i>circFSIP1</i> | miR-4750-3p           | 1 |
| <i>circFSIP1</i> | miR-4751              | 1 |
| <i>circFSIP1</i> | miR-4752              | 1 |
| <i>circFSIP1</i> | miR-4753-5p           | 1 |
| <i>circFSIP1</i> | miR-4756-3p           | 3 |
| <i>circFSIP1</i> | miR-4759              | 1 |
| <i>circFSIP1</i> | miR-4760-5p/8061      | 1 |

|                  |                     |   |
|------------------|---------------------|---|
| <i>circFSIP1</i> | miR-4762-3p         | 2 |
| <i>circFSIP1</i> | miR-4762-5p         | 2 |
| <i>circFSIP1</i> | miR-4764-3p         | 1 |
| <i>circFSIP1</i> | miR-4765            | 1 |
| <i>circFSIP1</i> | miR-4766-3p         | 1 |
| <i>circFSIP1</i> | miR-4766-5p         | 4 |
| <i>circFSIP1</i> | miR-4768-3p         | 1 |
| <i>circFSIP1</i> | miR-4772-5p         | 1 |
| <i>circFSIP1</i> | miR-4773            | 1 |
| <i>circFSIP1</i> | miR-4778-3p         | 1 |
| <i>circFSIP1</i> | miR-4779            | 1 |
| <i>circFSIP1</i> | miR-4782-5p/5706    | 1 |
| <i>circFSIP1</i> | miR-4795-3p         | 1 |
| <i>circFSIP1</i> | miR-4797-3p         | 2 |
| <i>circFSIP1</i> | miR-4797-5p         | 3 |
| <i>circFSIP1</i> | miR-4799-5p         | 2 |
| <i>circFSIP1</i> | miR-487a-5p/487b-5p | 1 |
| <i>circFSIP1</i> | miR-488-3p          | 1 |
| <i>circFSIP1</i> | miR-490-3p          | 1 |
| <i>circFSIP1</i> | miR-494-3p          | 2 |
| <i>circFSIP1</i> | miR-495-3p          | 2 |
| <i>circFSIP1</i> | miR-499a-3p/499b-3p | 1 |
| <i>circFSIP1</i> | miR-5003-5p         | 1 |
| <i>circFSIP1</i> | miR-5004-3p         | 1 |
| <i>circFSIP1</i> | miR-5004-5p         | 1 |
| <i>circFSIP1</i> | miR-5007-5p         | 1 |
| <i>circFSIP1</i> | miR-500b-3p         | 1 |
| <i>circFSIP1</i> | miR-503-5p          | 1 |
| <i>circFSIP1</i> | miR-504-3p          | 1 |
| <i>circFSIP1</i> | miR-508-5p          | 2 |
| <i>circFSIP1</i> | miR-5092            | 1 |
| <i>circFSIP1</i> | miR-5094            | 3 |
| <i>circFSIP1</i> | miR-510-3p          | 1 |
| <i>circFSIP1</i> | miR-511-5p          | 1 |
| <i>circFSIP1</i> | miR-512-5p          | 1 |
| <i>circFSIP1</i> | miR-514a-3p         | 1 |
| <i>circFSIP1</i> | miR-515-5p/519e-5p  | 3 |
| <i>circFSIP1</i> | miR-516a-5p         | 1 |

|                  |                                               |   |
|------------------|-----------------------------------------------|---|
| <i>circFSIP1</i> | miR-516b-5p                                   | 1 |
| <i>circFSIP1</i> | miR-5186                                      | 2 |
| <i>circFSIP1</i> | miR-5188                                      | 1 |
| <i>circFSIP1</i> | miR-5193                                      | 1 |
| <i>circFSIP1</i> | miR-5197-3p                                   | 4 |
| <i>circFSIP1</i> | miR-519d-5p                                   | 2 |
| <i>circFSIP1</i> | miR-520f-5p                                   | 1 |
| <i>circFSIP1</i> | miR-523-3p                                    | 1 |
| <i>circFSIP1</i> | miR-525-5p                                    | 3 |
| <i>circFSIP1</i> | miR-532-5p                                    | 1 |
| <i>circFSIP1</i> | miR-539-3p                                    | 1 |
| <i>circFSIP1</i> | miR-539-5p                                    | 5 |
| <i>circFSIP1</i> | miR-542-3p                                    | 1 |
| <i>circFSIP1</i> | miR-543                                       | 1 |
| <i>circFSIP1</i> | miR-545-5p                                    | 1 |
| <i>circFSIP1</i> | miR-548ah-5p/3609                             | 2 |
| <i>circFSIP1</i> | miR-548aj-5p/548f-5p/548g-5p/548x-5p          | 1 |
| <i>circFSIP1</i> | miR-548an                                     | 3 |
| <i>circFSIP1</i> | miR-548ao-3p                                  | 1 |
| <i>circFSIP1</i> | miR-548ao-5p/548ax                            | 1 |
| <i>circFSIP1</i> | miR-548ap-3p/548aa/548t-3p                    | 1 |
| <i>circFSIP1</i> | miR-548as-3p                                  | 1 |
| <i>circFSIP1</i> | miR-548av-3p                                  | 1 |
| <i>circFSIP1</i> | miR-548ay-3p/548at-3p                         | 1 |
| <i>circFSIP1</i> | miR-548az-3p/548ar-3p/548a-3p/548e-3p/548f-3p | 2 |
| <i>circFSIP1</i> | miR-548b-3p                                   | 2 |
| <i>circFSIP1</i> | miR-548c-3p                                   | 1 |
| <i>circFSIP1</i> | miR-548e-5p                                   | 1 |
| <i>circFSIP1</i> | miR-548g-3p                                   | 1 |
| <i>circFSIP1</i> | miR-548m                                      | 1 |
| <i>circFSIP1</i> | miR-548p                                      | 1 |
| <i>circFSIP1</i> | miR-548s                                      | 1 |
| <i>circFSIP1</i> | miR-548u/7161-5p                              | 1 |
| <i>circFSIP1</i> | miR-551b-5p                                   | 1 |
| <i>circFSIP1</i> | miR-555                                       | 1 |
| <i>circFSIP1</i> | miR-5579-5p                                   | 1 |
| <i>circFSIP1</i> | miR-5582-3p                                   | 2 |
| <i>circFSIP1</i> | miR-5583-3p                                   | 3 |

|                  |                 |   |
|------------------|-----------------|---|
| <i>circFSIP1</i> | miR-5584-3p     | 2 |
| <i>circFSIP1</i> | miR-5585-5p     | 1 |
| <i>circFSIP1</i> | miR-5586-3p     | 1 |
| <i>circFSIP1</i> | miR-5589-5p     | 1 |
| <i>circFSIP1</i> | miR-5680        | 5 |
| <i>circFSIP1</i> | miR-5689        | 1 |
| <i>circFSIP1</i> | miR-5693        | 1 |
| <i>circFSIP1</i> | miR-5695        | 2 |
| <i>circFSIP1</i> | miR-570-3p      | 1 |
| <i>circFSIP1</i> | miR-5700        | 2 |
| <i>circFSIP1</i> | miR-5702        | 1 |
| <i>circFSIP1</i> | miR-576-5p      | 1 |
| <i>circFSIP1</i> | miR-580-3p      | 2 |
| <i>circFSIP1</i> | miR-580-5p      | 1 |
| <i>circFSIP1</i> | miR-582-3p      | 2 |
| <i>circFSIP1</i> | miR-583         | 2 |
| <i>circFSIP1</i> | miR-584-5p      | 2 |
| <i>circFSIP1</i> | miR-586         | 1 |
| <i>circFSIP1</i> | miR-588         | 1 |
| <i>circFSIP1</i> | miR-590-3p      | 1 |
| <i>circFSIP1</i> | miR-593-3p      | 1 |
| <i>circFSIP1</i> | miR-595         | 1 |
| <i>circFSIP1</i> | miR-605-5p      | 2 |
| <i>circFSIP1</i> | miR-6077        | 2 |
| <i>circFSIP1</i> | miR-6079        | 1 |
| <i>circFSIP1</i> | miR-6124        | 2 |
| <i>circFSIP1</i> | miR-6126        | 2 |
| <i>circFSIP1</i> | miR-6131        | 1 |
| <i>circFSIP1</i> | miR-616-3p      | 1 |
| <i>circFSIP1</i> | miR-618         | 1 |
| <i>circFSIP1</i> | miR-622         | 1 |
| <i>circFSIP1</i> | miR-627-3p      | 1 |
| <i>circFSIP1</i> | miR-627-5p      | 1 |
| <i>circFSIP1</i> | miR-628-5p      | 1 |
| <i>circFSIP1</i> | miR-629-3p      | 2 |
| <i>circFSIP1</i> | miR-640         | 1 |
| <i>circFSIP1</i> | miR-641/3617-5p | 2 |
| <i>circFSIP1</i> | miR-642-3p      | 1 |

|                  |                     |   |
|------------------|---------------------|---|
| <i>circFSIP1</i> | miR-642a-5p         | 1 |
| <i>circFSIP1</i> | miR-642b-5p         | 1 |
| <i>circFSIP1</i> | miR-646             | 1 |
| <i>circFSIP1</i> | miR-647             | 1 |
| <i>circFSIP1</i> | miR-648             | 1 |
| <i>circFSIP1</i> | miR-649             | 1 |
| <i>circFSIP1</i> | miR-6502-3p         | 1 |
| <i>circFSIP1</i> | miR-6507-5p         | 4 |
| <i>circFSIP1</i> | miR-6509-3p         | 1 |
| <i>circFSIP1</i> | miR-651-3p          | 3 |
| <i>circFSIP1</i> | miR-651-5p          | 1 |
| <i>circFSIP1</i> | miR-6513-5p         | 1 |
| <i>circFSIP1</i> | miR-6516-3p         | 1 |
| <i>circFSIP1</i> | miR-6516-5p         | 1 |
| <i>circFSIP1</i> | miR-653-3p          | 1 |
| <i>circFSIP1</i> | miR-653-5p          | 1 |
| <i>circFSIP1</i> | miR-654-3p          | 1 |
| <i>circFSIP1</i> | miR-660-3p          | 1 |
| <i>circFSIP1</i> | miR-664a-5p/4794    | 1 |
| <i>circFSIP1</i> | miR-665             | 1 |
| <i>circFSIP1</i> | miR-668-3p          | 1 |
| <i>circFSIP1</i> | miR-670-3p          | 1 |
| <i>circFSIP1</i> | miR-6728-3p         | 1 |
| <i>circFSIP1</i> | miR-6731-5p/8085    | 1 |
| <i>circFSIP1</i> | miR-6733-3p         | 2 |
| <i>circFSIP1</i> | miR-6740-3p         | 1 |
| <i>circFSIP1</i> | miR-6741-5p         | 2 |
| <i>circFSIP1</i> | miR-6744-5p         | 2 |
| <i>circFSIP1</i> | miR-6748-5p         | 1 |
| <i>circFSIP1</i> | miR-675-3p          | 1 |
| <i>circFSIP1</i> | miR-6750-3p         | 1 |
| <i>circFSIP1</i> | miR-6753-5p         | 1 |
| <i>circFSIP1</i> | miR-6756-5p/6766-5p | 1 |
| <i>circFSIP1</i> | miR-6758-5p/6856-5p | 2 |
| <i>circFSIP1</i> | miR-6759-5p         | 1 |
| <i>circFSIP1</i> | miR-676-5p          | 1 |
| <i>circFSIP1</i> | miR-6760-3p         | 1 |
| <i>circFSIP1</i> | miR-6761-5p         | 2 |

|                  |                     |   |
|------------------|---------------------|---|
| <i>circFSIP1</i> | miR-6765-3p         | 1 |
| <i>circFSIP1</i> | miR-6768-3p         | 3 |
| <i>circFSIP1</i> | miR-6770-5p         | 1 |
| <i>circFSIP1</i> | miR-6771-3p         | 1 |
| <i>circFSIP1</i> | miR-6776-5p         | 1 |
| <i>circFSIP1</i> | miR-6778-3p         | 1 |
| <i>circFSIP1</i> | miR-6782-3p         | 2 |
| <i>circFSIP1</i> | miR-6782-5p         | 1 |
| <i>circFSIP1</i> | miR-6791-3p/6829-3p | 1 |
| <i>circFSIP1</i> | miR-6793-5p         | 1 |
| <i>circFSIP1</i> | miR-6796-3p         | 1 |
| <i>circFSIP1</i> | miR-6796-5p         | 1 |
| <i>circFSIP1</i> | miR-6798-5p         | 1 |
| <i>circFSIP1</i> | miR-6802-3p         | 1 |
| <i>circFSIP1</i> | miR-6807-5p         | 1 |
| <i>circFSIP1</i> | miR-6816-3p         | 2 |
| <i>circFSIP1</i> | miR-6817-3p         | 2 |
| <i>circFSIP1</i> | miR-6818-3p         | 1 |
| <i>circFSIP1</i> | miR-6819-3p/6877-3p | 1 |
| <i>circFSIP1</i> | miR-6822-3p         | 1 |
| <i>circFSIP1</i> | miR-6826-3p         | 1 |
| <i>circFSIP1</i> | miR-6826-5p         | 1 |
| <i>circFSIP1</i> | miR-6830-5p         | 2 |
| <i>circFSIP1</i> | miR-6833-5p         | 1 |
| <i>circFSIP1</i> | miR-6842-3p         | 1 |
| <i>circFSIP1</i> | miR-6845-3p         | 1 |
| <i>circFSIP1</i> | miR-6851-3p         | 1 |
| <i>circFSIP1</i> | miR-6854-5p         | 1 |
| <i>circFSIP1</i> | miR-6857-3p         | 1 |
| <i>circFSIP1</i> | miR-6861-5p         | 1 |
| <i>circFSIP1</i> | miR-6864-5p         | 2 |
| <i>circFSIP1</i> | miR-6868-3p         | 2 |
| <i>circFSIP1</i> | miR-6873-3p         | 1 |
| <i>circFSIP1</i> | miR-6875-3p         | 1 |
| <i>circFSIP1</i> | miR-6878-5p         | 1 |
| <i>circFSIP1</i> | miR-6879-3p         | 1 |
| <i>circFSIP1</i> | miR-6881-5p         | 1 |
| <i>circFSIP1</i> | miR-6884-3p         | 2 |

|                  |              |   |
|------------------|--------------|---|
| <i>circFSIP1</i> | miR-6888-5p  | 2 |
| <i>circFSIP1</i> | miR-6894-5p  | 1 |
| <i>circFSIP1</i> | miR-6895-3p  | 1 |
| <i>circFSIP1</i> | miR-7-5p     | 2 |
| <i>circFSIP1</i> | miR-7109-3p  | 1 |
| <i>circFSIP1</i> | miR-7110-3p  | 2 |
| <i>circFSIP1</i> | miR-7112-3p  | 1 |
| <i>circFSIP1</i> | miR-7151-5p  | 1 |
| <i>circFSIP1</i> | miR-7154-3p  | 1 |
| <i>circFSIP1</i> | miR-7154-5p  | 1 |
| <i>circFSIP1</i> | miR-7156-3p  | 1 |
| <i>circFSIP1</i> | miR-7158-3p  | 1 |
| <i>circFSIP1</i> | miR-7160-5p  | 1 |
| <i>circFSIP1</i> | miR-7162-3p  | 1 |
| <i>circFSIP1</i> | miR-758-5p   | 2 |
| <i>circFSIP1</i> | miR-760      | 1 |
| <i>circFSIP1</i> | miR-765      | 1 |
| <i>circFSIP1</i> | miR-766-3p   | 4 |
| <i>circFSIP1</i> | miR-766-5p   | 1 |
| <i>circFSIP1</i> | miR-7843-3p  | 2 |
| <i>circFSIP1</i> | miR-7849-3p  | 1 |
| <i>circFSIP1</i> | miR-7855-5p  | 2 |
| <i>circFSIP1</i> | miR-7977     | 1 |
| <i>circFSIP1</i> | miR-802      | 1 |
| <i>circFSIP1</i> | miR-8066     | 2 |
| <i>circFSIP1</i> | miR-8069     | 1 |
| <i>circFSIP1</i> | miR-8070     | 1 |
| <i>circFSIP1</i> | miR-8076     | 1 |
| <i>circFSIP1</i> | miR-8077     | 1 |
| <i>circFSIP1</i> | miR-8080     | 2 |
| <i>circFSIP1</i> | miR-8083     | 1 |
| <i>circFSIP1</i> | miR-8087     | 3 |
| <i>circFSIP1</i> | miR-873-3p   | 1 |
| <i>circFSIP1</i> | miR-873-5p.1 | 1 |
| <i>circFSIP1</i> | miR-876-3p   | 1 |
| <i>circFSIP1</i> | miR-876-5p   | 1 |
| <i>circFSIP1</i> | miR-887-5p   | 1 |
| <i>circFSIP1</i> | miR-888-5p   | 2 |



|                  |                       |   |
|------------------|-----------------------|---|
| <i>circFSIP1</i> | miR-890               | 1 |
| <i>circFSIP1</i> | miR-891a-5p           | 1 |
| <i>circFSIP1</i> | miR-9-3p              | 1 |
| <i>circFSIP1</i> | miR-921               | 1 |
| <i>circFSIP1</i> | miR-922               | 1 |
| <i>circFSIP1</i> | miR-935               | 2 |
| <i>circFSIP1</i> | miR-937-5p            | 1 |
| <i>circFSIP1</i> | miR-943               | 1 |
| <i>circFSIP1</i> | miR-96-3p             | 1 |
| <i>circFSIP1</i> | miR-96-5p/1271-5p     | 2 |
| <i>circFSIP1</i> | miR-99-3p             | 1 |
| <i>circFSIP1</i> | miR-1233-5p/6778-5p   | 1 |
| <i>circFSIP1</i> | miR-1245b-5p          | 1 |
| <i>circFSIP1</i> | miR-1264              | 1 |
| <i>circFSIP1</i> | miR-1267              | 1 |
| <i>circFSIP1</i> | miR-1273f             | 1 |
| <i>circFSIP1</i> | miR-1277-5p           | 1 |
| <i>circFSIP1</i> | miR-1294              | 1 |
| <i>circFSIP1</i> | miR-1295a             | 1 |
| <i>circFSIP1</i> | miR-1296-3p           | 1 |
| <i>circFSIP1</i> | miR-139-3p            | 1 |
| <i>circFSIP1</i> | miR-143-3p            | 1 |
| <i>circFSIP1</i> | miR-211-3p            | 1 |
| <i>circFSIP1</i> | miR-2276-3p           | 1 |
| <i>circFSIP1</i> | miR-2467-5p           | 1 |
| <i>circFSIP1</i> | miR-26-3p             | 1 |
| <i>circFSIP1</i> | miR-298               | 1 |
| <i>circFSIP1</i> | miR-302c-5p           | 1 |
| <i>circFSIP1</i> | miR-3125/3916/6859-5p | 1 |
| <i>circFSIP1</i> | miR-3134              | 1 |
| <i>circFSIP1</i> | miR-3146              | 2 |
| <i>circFSIP1</i> | miR-3161              | 1 |
| <i>circFSIP1</i> | miR-3174              | 1 |
| <i>circFSIP1</i> | miR-3184-3p           | 1 |
| <i>circFSIP1</i> | miR-3188              | 1 |
| <i>circFSIP1</i> | miR-331-5p            | 1 |
| <i>circFSIP1</i> | miR-346               | 1 |
| <i>circFSIP1</i> | miR-3653-3p           | 2 |

|                  |                             |   |
|------------------|-----------------------------|---|
| <i>circFSIP1</i> | miR-367-5p                  | 1 |
| <i>circFSIP1</i> | miR-3692-5p                 | 1 |
| <i>circFSIP1</i> | miR-376a-2-5p               | 1 |
| <i>circFSIP1</i> | miR-376a-5p                 | 1 |
| <i>circFSIP1</i> | miR-3912-3p                 | 1 |
| <i>circFSIP1</i> | miR-3973                    | 1 |
| <i>circFSIP1</i> | miR-3975                    | 1 |
| <i>circFSIP1</i> | miR-411-3p                  | 1 |
| <i>circFSIP1</i> | miR-4257                    | 2 |
| <i>circFSIP1</i> | miR-4261                    | 1 |
| <i>circFSIP1</i> | miR-4282                    | 1 |
| <i>circFSIP1</i> | miR-4307                    | 1 |
| <i>circFSIP1</i> | miR-4316                    | 1 |
| <i>circFSIP1</i> | miR-4470                    | 2 |
| <i>circFSIP1</i> | miR-449c-3p                 | 1 |
| <i>circFSIP1</i> | miR-452-5p/892-3p           | 1 |
| <i>circFSIP1</i> | miR-4534/8082               | 1 |
| <i>circFSIP1</i> | miR-4648                    | 1 |
| <i>circFSIP1</i> | miR-4654/4769-5p            | 1 |
| <i>circFSIP1</i> | miR-4683                    | 1 |
| <i>circFSIP1</i> | miR-4691-3p                 | 1 |
| <i>circFSIP1</i> | miR-4698                    | 1 |
| <i>circFSIP1</i> | miR-4708-3p                 | 1 |
| <i>circFSIP1</i> | miR-4708-5p                 | 1 |
| <i>circFSIP1</i> | miR-4761-5p                 | 1 |
| <i>circFSIP1</i> | miR-4772-3p                 | 1 |
| <i>circFSIP1</i> | miR-4777-5p                 | 1 |
| <i>circFSIP1</i> | miR-485-5p                  | 1 |
| <i>circFSIP1</i> | miR-488-5p                  | 1 |
| <i>circFSIP1</i> | miR-498                     | 1 |
| <i>circFSIP1</i> | miR-5002-3p                 | 1 |
| <i>circFSIP1</i> | miR-5009-3p                 | 1 |
| <i>circFSIP1</i> | miR-506-5p                  | 1 |
| <i>circFSIP1</i> | miR-513a-3p/513c-3p/3606-3p | 1 |
| <i>circFSIP1</i> | miR-513c-5p/514b-5p         | 1 |
| <i>circFSIP1</i> | miR-518a-5p/527             | 1 |
| <i>circFSIP1</i> | miR-518d-5p/519-5p          | 1 |
| <i>circFSIP1</i> | miR-520g-3p                 | 1 |

|                  |                                                                   |   |
|------------------|-------------------------------------------------------------------|---|
| <i>circFSIP1</i> | miR-524-5p                                                        | 1 |
| <i>circFSIP1</i> | miR-548ac/548bb-3p/548d-3p/548h-3p/548z                           |   |
| <i>circFSIP1</i> | miR-548aq-3p/548am-3p/548aj-3p/548ah1-3p/548ae-3p/548j-3p/548x-3p |   |
| <i>circFSIP1</i> | miR-548av-5p/548k/8054                                            | 1 |
| <i>circFSIP1</i> | miR-548aw                                                         | 1 |
| <i>circFSIP1</i> | miR-548ay-5p/548au-5p/548as-5p/548ar-5p/548aq-5p/548ap-5p/548am-  |   |
| <i>circFSIP1</i> | miR-548az-5p/548t-5p                                              | 3 |
| <i>circFSIP1</i> | miR-548l                                                          | 1 |
| <i>circFSIP1</i> | miR-548n                                                          | 3 |
| <i>circFSIP1</i> | miR-567                                                           | 1 |
| <i>circFSIP1</i> | miR-5684                                                          | 1 |
| <i>circFSIP1</i> | miR-5704                                                          | 1 |
| <i>circFSIP1</i> | miR-577                                                           | 1 |
| <i>circFSIP1</i> | miR-601                                                           | 1 |
| <i>circFSIP1</i> | miR-6083                                                          | 1 |
| <i>circFSIP1</i> | miR-6134                                                          | 1 |
| <i>circFSIP1</i> | miR-634                                                           | 1 |
| <i>circFSIP1</i> | miR-6507-3p                                                       | 2 |
| <i>circFSIP1</i> | miR-6508-5p/8067                                                  | 2 |
| <i>circFSIP1</i> | miR-656-3p                                                        | 1 |
| <i>circFSIP1</i> | miR-6731-3p                                                       | 1 |
| <i>circFSIP1</i> | miR-6767-5p                                                       | 1 |
| <i>circFSIP1</i> | miR-6768-5p                                                       | 1 |
| <i>circFSIP1</i> | miR-6806-5p                                                       | 1 |
| <i>circFSIP1</i> | miR-6844                                                          | 1 |
| <i>circFSIP1</i> | miR-6847-5p                                                       | 2 |
| <i>circFSIP1</i> | miR-6849-3p                                                       | 1 |
| <i>circFSIP1</i> | miR-7854-3p                                                       | 1 |
| <i>circFSIP1</i> | miR-8063                                                          | 1 |
| <i>circFSIP1</i> | miR-8078                                                          | 1 |
| <i>circFSIP1</i> | miR-892-5p                                                        | 1 |
| <i>circFSIP1</i> | miR-892b                                                          | 1 |
| <i>circFSIP1</i> | miR-93-3p                                                         | 1 |
| <i>circFSIP1</i> | miR-95-5p                                                         | 1 |
| <i>circGRHPR</i> | miR-100-3p                                                        | 1 |
| <i>circGRHPR</i> | miR-103-3p/107                                                    | 1 |
| <i>circGRHPR</i> | miR-103a-2-5p                                                     | 2 |
| <i>circGRHPR</i> | miR-103b                                                          | 1 |

|                  |                     |   |
|------------------|---------------------|---|
| <i>circGRHPR</i> | miR-1184            | 2 |
| <i>circGRHPR</i> | miR-1197            | 2 |
| <i>circGRHPR</i> | miR-1202/3972       | 1 |
| <i>circGRHPR</i> | miR-1205            | 2 |
| <i>circGRHPR</i> | miR-1207-5p/4763-3p | 3 |
| <i>circGRHPR</i> | miR-1208            | 1 |
| <i>circGRHPR</i> | miR-1227-3p         | 1 |
| <i>circGRHPR</i> | miR-1228-3p         | 1 |
| <i>circGRHPR</i> | miR-1236-3p         | 1 |
| <i>circGRHPR</i> | miR-1237-3p         | 1 |
| <i>circGRHPR</i> | miR-1238-3p         | 3 |
| <i>circGRHPR</i> | miR-1248            | 1 |
| <i>circGRHPR</i> | miR-125-5p          | 1 |
| <i>circGRHPR</i> | miR-1251-5p         | 2 |
| <i>circGRHPR</i> | miR-1252-3p         | 1 |
| <i>circGRHPR</i> | miR-1252-5p         | 1 |
| <i>circGRHPR</i> | miR-125a-3p         | 2 |
| <i>circGRHPR</i> | miR-1260a/1260b     | 4 |
| <i>circGRHPR</i> | miR-127-3p          | 2 |
| <i>circGRHPR</i> | miR-1273g-3p        | 1 |
| <i>circGRHPR</i> | miR-1279            | 1 |
| <i>circGRHPR</i> | miR-1287-3p         | 1 |
| <i>circGRHPR</i> | miR-1288-3p         | 1 |
| <i>circGRHPR</i> | miR-1288-5p         | 1 |
| <i>circGRHPR</i> | miR-1291/6775-3p    | 1 |
| <i>circGRHPR</i> | miR-1295a           | 1 |
| <i>circGRHPR</i> | miR-1298-3p         | 3 |
| <i>circGRHPR</i> | miR-1298-5p         | 1 |
| <i>circGRHPR</i> | miR-1301-3p         | 1 |
| <i>circGRHPR</i> | miR-1301-5p/6502-5p | 1 |
| <i>circGRHPR</i> | miR-1302/4298       | 1 |
| <i>circGRHPR</i> | miR-1306-5p         | 2 |
| <i>circGRHPR</i> | miR-130b-5p         | 1 |
| <i>circGRHPR</i> | miR-132-5p          | 1 |
| <i>circGRHPR</i> | miR-1324            | 3 |
| <i>circGRHPR</i> | miR-134-3p          | 1 |
| <i>circGRHPR</i> | miR-138-2-3p        | 1 |
| <i>circGRHPR</i> | miR-140-3p.1        | 2 |

|                  |                      |   |
|------------------|----------------------|---|
| <i>circGRHPR</i> | miR-143-5p           | 2 |
| <i>circGRHPR</i> | miR-1469             | 2 |
| <i>circGRHPR</i> | miR-1470             | 1 |
| <i>circGRHPR</i> | miR-150-5p           | 1 |
| <i>circGRHPR</i> | miR-1587/3620-5p     | 1 |
| <i>circGRHPR</i> | miR-15b-3p           | 1 |
| <i>circGRHPR</i> | miR-17-3p            | 2 |
| <i>circGRHPR</i> | miR-181-5p           | 1 |
| <i>circGRHPR</i> | miR-182-5p           | 1 |
| <i>circGRHPR</i> | miR-1827             | 1 |
| <i>circGRHPR</i> | miR-183-3p           | 1 |
| <i>circGRHPR</i> | miR-185-3p           | 3 |
| <i>circGRHPR</i> | miR-185-5p           | 1 |
| <i>circGRHPR</i> | miR-186-5p           | 1 |
| <i>circGRHPR</i> | miR-188-3p           | 4 |
| <i>circGRHPR</i> | miR-190-5p           | 2 |
| <i>circGRHPR</i> | miR-1909-3p/6722-3p  | 3 |
| <i>circGRHPR</i> | miR-1910-3p/6511a-5p | 1 |
| <i>circGRHPR</i> | miR-1910-5p          | 1 |
| <i>circGRHPR</i> | miR-1914-5p          | 1 |
| <i>circGRHPR</i> | miR-192-5p/215-5p    | 1 |
| <i>circGRHPR</i> | miR-193b-5p          | 1 |
| <i>circGRHPR</i> | miR-194-5p           | 1 |
| <i>circGRHPR</i> | miR-196a-3p          | 2 |
| <i>circGRHPR</i> | miR-1972             | 1 |
| <i>circGRHPR</i> | miR-202-5p           | 1 |
| <i>circGRHPR</i> | miR-203b-5p/6718-5p  | 2 |
| <i>circGRHPR</i> | miR-204-3p/4646-5p   | 1 |
| <i>circGRHPR</i> | miR-205-3p           | 2 |
| <i>circGRHPR</i> | miR-21-3p/3591-3p    | 1 |
| <i>circGRHPR</i> | miR-210-5p           | 1 |
| <i>circGRHPR</i> | miR-2110             | 1 |
| <i>circGRHPR</i> | miR-2114-5p          | 1 |
| <i>circGRHPR</i> | miR-2115-3p          | 1 |
| <i>circGRHPR</i> | miR-2116-3p          | 1 |
| <i>circGRHPR</i> | miR-212-5p           | 1 |
| <i>circGRHPR</i> | miR-215-3p           | 2 |
| <i>circGRHPR</i> | miR-22-3p            | 1 |

|                  |                           |   |
|------------------|---------------------------|---|
| <i>circGRHPR</i> | miR-2276-5p               | 2 |
| <i>circGRHPR</i> | miR-2278                  | 1 |
| <i>circGRHPR</i> | miR-23-3p                 | 1 |
| <i>circGRHPR</i> | miR-2355-3p               | 1 |
| <i>circGRHPR</i> | miR-24-3p                 | 1 |
| <i>circGRHPR</i> | miR-2467-3p               | 1 |
| <i>circGRHPR</i> | miR-296-3p                | 1 |
| <i>circGRHPR</i> | miR-296-5p                | 1 |
| <i>circGRHPR</i> | miR-299-3p                | 1 |
| <i>circGRHPR</i> | miR-299-5p                | 1 |
| <i>circGRHPR</i> | miR-29a-5p                | 2 |
| <i>circGRHPR</i> | miR-3121-5p               | 1 |
| <i>circGRHPR</i> | miR-3125/3916/6859-5p     | 1 |
| <i>circGRHPR</i> | miR-3126-3p               | 3 |
| <i>circGRHPR</i> | miR-3126-5p               | 1 |
| <i>circGRHPR</i> | miR-3127-5p               | 2 |
| <i>circGRHPR</i> | miR-3133                  | 1 |
| <i>circGRHPR</i> | miR-3134                  | 1 |
| <i>circGRHPR</i> | miR-3136-5p/4439          | 1 |
| <i>circGRHPR</i> | miR-3138                  | 1 |
| <i>circGRHPR</i> | miR-3140-5p               | 1 |
| <i>circGRHPR</i> | miR-3143                  | 1 |
| <i>circGRHPR</i> | miR-3150a-3p              | 1 |
| <i>circGRHPR</i> | miR-3150b-3p              | 1 |
| <i>circGRHPR</i> | miR-3151-5p               | 1 |
| <i>circGRHPR</i> | miR-3156-3p               | 4 |
| <i>circGRHPR</i> | miR-3156-5p               | 1 |
| <i>circGRHPR</i> | miR-3157-5p               | 2 |
| <i>circGRHPR</i> | miR-3158-5p               | 2 |
| <i>circGRHPR</i> | miR-3170/6855-5p          | 3 |
| <i>circGRHPR</i> | miR-3183/4723-3p/6769b-3p | 1 |
| <i>circGRHPR</i> | miR-3189-3p               | 1 |
| <i>circGRHPR</i> | miR-3192-5p               | 1 |
| <i>circGRHPR</i> | miR-3198/4309             | 1 |
| <i>circGRHPR</i> | miR-3199/8052             | 1 |
| <i>circGRHPR</i> | miR-3200-5p               | 1 |
| <i>circGRHPR</i> | miR-3201/4791             | 2 |
| <i>circGRHPR</i> | miR-3202                  | 1 |

|                  |                           |   |
|------------------|---------------------------|---|
| <i>circGRHPR</i> | miR-320e                  | 1 |
| <i>circGRHPR</i> | miR-323a-5p               | 5 |
| <i>circGRHPR</i> | miR-324-5p                | 1 |
| <i>circGRHPR</i> | miR-328-3p                | 2 |
| <i>circGRHPR</i> | miR-330-3p                | 2 |
| <i>circGRHPR</i> | miR-331-3p                | 1 |
| <i>circGRHPR</i> | miR-337-3p                | 1 |
| <i>circGRHPR</i> | miR-34-5p/449-5p          | 1 |
| <i>circGRHPR</i> | miR-340-5p                | 1 |
| <i>circGRHPR</i> | miR-342-3p                | 1 |
| <i>circGRHPR</i> | miR-342-5p/4664-5p        | 2 |
| <i>circGRHPR</i> | miR-345-3p                | 1 |
| <i>circGRHPR</i> | miR-34a-3p                | 2 |
| <i>circGRHPR</i> | miR-34b-5p/449c-5p        | 1 |
| <i>circGRHPR</i> | miR-3607-5p               | 1 |
| <i>circGRHPR</i> | miR-3611                  | 1 |
| <i>circGRHPR</i> | miR-3612                  | 1 |
| <i>circGRHPR</i> | miR-3613-3p               | 2 |
| <i>circGRHPR</i> | miR-3617-3p               | 2 |
| <i>circGRHPR</i> | miR-3618                  | 1 |
| <i>circGRHPR</i> | miR-3622a-3p/3622b-3p     | 1 |
| <i>circGRHPR</i> | miR-3646                  | 1 |
| <i>circGRHPR</i> | miR-3651                  | 1 |
| <i>circGRHPR</i> | miR-3655                  | 1 |
| <i>circGRHPR</i> | miR-365a-5p/365b-5p       | 1 |
| <i>circGRHPR</i> | miR-3663-3p               | 1 |
| <i>circGRHPR</i> | miR-3665                  | 2 |
| <i>circGRHPR</i> | miR-3682-5p               | 1 |
| <i>circGRHPR</i> | miR-3685                  | 1 |
| <i>circGRHPR</i> | miR-3688-3p               | 1 |
| <i>circGRHPR</i> | miR-3691-3p               | 2 |
| <i>circGRHPR</i> | miR-3692-5p               | 2 |
| <i>circGRHPR</i> | miR-371-5p                | 1 |
| <i>circGRHPR</i> | miR-371b-5p/373-5p/616-5p | 1 |
| <i>circGRHPR</i> | miR-372-5p                | 1 |
| <i>circGRHPR</i> | miR-376-3p                | 1 |
| <i>circGRHPR</i> | miR-376a-2-5p             | 1 |
| <i>circGRHPR</i> | miR-376a-5p               | 1 |

|                  |                                    |   |
|------------------|------------------------------------|---|
| <i>circGRHPR</i> | miR-383-5p.1                       | 1 |
| <i>circGRHPR</i> | miR-383-5p.2                       | 1 |
| <i>circGRHPR</i> | miR-384                            | 1 |
| <i>circGRHPR</i> | miR-3907                           | 2 |
| <i>circGRHPR</i> | miR-3909                           | 1 |
| <i>circGRHPR</i> | miR-3912-5p                        | 1 |
| <i>circGRHPR</i> | miR-3913-3p                        | 3 |
| <i>circGRHPR</i> | miR-3917                           | 2 |
| <i>circGRHPR</i> | miR-3925-3p                        | 1 |
| <i>circGRHPR</i> | miR-3928-5p/6806-3p                | 1 |
| <i>circGRHPR</i> | miR-3934-3p                        | 1 |
| <i>circGRHPR</i> | miR-3934-5p                        | 2 |
| <i>circGRHPR</i> | miR-3941                           | 1 |
| <i>circGRHPR</i> | miR-412-3p/6754-3p                 | 1 |
| <i>circGRHPR</i> | miR-412-5p                         | 2 |
| <i>circGRHPR</i> | miR-421                            | 1 |
| <i>circGRHPR</i> | miR-424-3p                         | 1 |
| <i>circGRHPR</i> | miR-4256                           | 1 |
| <i>circGRHPR</i> | miR-4258                           | 1 |
| <i>circGRHPR</i> | miR-4265/4296/4322                 | 1 |
| <i>circGRHPR</i> | miR-4268                           | 1 |
| <i>circGRHPR</i> | miR-4270/4441/6754-5p              | 4 |
| <i>circGRHPR</i> | miR-4284                           | 1 |
| <i>circGRHPR</i> | miR-4287/4685-3p                   | 2 |
| <i>circGRHPR</i> | miR-4299                           | 1 |
| <i>circGRHPR</i> | miR-4301                           | 3 |
| <i>circGRHPR</i> | miR-4310/7157-5p                   | 1 |
| <i>circGRHPR</i> | miR-4313                           | 2 |
| <i>circGRHPR</i> | miR-4314                           | 2 |
| <i>circGRHPR</i> | miR-4330                           | 1 |
| <i>circGRHPR</i> | miR-4417                           | 1 |
| <i>circGRHPR</i> | miR-4419a/4510/6127/6129/6130/6133 | 1 |
| <i>circGRHPR</i> | miR-4424                           | 1 |
| <i>circGRHPR</i> | miR-4426/4647/4662b                | 1 |
| <i>circGRHPR</i> | miR-4427                           | 2 |
| <i>circGRHPR</i> | miR-4433a-5p                       | 1 |
| <i>circGRHPR</i> | miR-4437                           | 1 |
| <i>circGRHPR</i> | miR-4447/4472                      | 1 |



|                  |                          |   |
|------------------|--------------------------|---|
| <i>circGRHPR</i> | miR-4448                 | 1 |
| <i>circGRHPR</i> | miR-4450                 | 1 |
| <i>circGRHPR</i> | miR-4452                 | 1 |
| <i>circGRHPR</i> | miR-4455                 | 2 |
| <i>circGRHPR</i> | miR-4456                 | 1 |
| <i>circGRHPR</i> | miR-4463                 | 2 |
| <i>circGRHPR</i> | miR-4467                 | 2 |
| <i>circGRHPR</i> | miR-4468                 | 1 |
| <i>circGRHPR</i> | miR-4469                 | 2 |
| <i>circGRHPR</i> | miR-4476/6876-5p         | 1 |
| <i>circGRHPR</i> | miR-4480                 | 2 |
| <i>circGRHPR</i> | miR-4482-3p              | 1 |
| <i>circGRHPR</i> | miR-4491/4657            | 1 |
| <i>circGRHPR</i> | miR-4499                 | 2 |
| <i>circGRHPR</i> | miR-4501                 | 1 |
| <i>circGRHPR</i> | miR-4502                 | 2 |
| <i>circGRHPR</i> | miR-4513/6855-3p         | 1 |
| <i>circGRHPR</i> | miR-4515                 | 1 |
| <i>circGRHPR</i> | miR-452-3p               | 1 |
| <i>circGRHPR</i> | miR-452-5p/892-3p        | 1 |
| <i>circGRHPR</i> | miR-4520-3p              | 1 |
| <i>circGRHPR</i> | miR-4524-5p              | 2 |
| <i>circGRHPR</i> | miR-4533                 | 1 |
| <i>circGRHPR</i> | miR-4534/8082            | 1 |
| <i>circGRHPR</i> | miR-4536-5p              | 5 |
| <i>circGRHPR</i> | miR-4539                 | 1 |
| <i>circGRHPR</i> | miR-455-3p.1             | 1 |
| <i>circGRHPR</i> | miR-455-3p.2             | 2 |
| <i>circGRHPR</i> | miR-4646-3p              | 1 |
| <i>circGRHPR</i> | miR-4650-5p              | 1 |
| <i>circGRHPR</i> | miR-4653-3p              | 1 |
| <i>circGRHPR</i> | miR-4659a-3p/4659b-3p    | 1 |
| <i>circGRHPR</i> | miR-4661-3p              | 1 |
| <i>circGRHPR</i> | miR-4662-5p              | 3 |
| <i>circGRHPR</i> | miR-4662a-3p             | 1 |
| <i>circGRHPR</i> | miR-4667-3p              | 1 |
| <i>circGRHPR</i> | miR-4667-5p/4700-5p/8089 | 3 |
| <i>circGRHPR</i> | miR-4670-3p              | 1 |

|                  |                     |   |
|------------------|---------------------|---|
| <i>circGRHPR</i> | miR-4672            | 1 |
| <i>circGRHPR</i> | miR-4674            | 1 |
| <i>circGRHPR</i> | miR-4678            | 1 |
| <i>circGRHPR</i> | miR-4680-3p         | 2 |
| <i>circGRHPR</i> | miR-4684-5p         | 1 |
| <i>circGRHPR</i> | miR-4686            | 1 |
| <i>circGRHPR</i> | miR-4690-5p         | 3 |
| <i>circGRHPR</i> | miR-4691-3p         | 1 |
| <i>circGRHPR</i> | miR-4695-5p         | 1 |
| <i>circGRHPR</i> | miR-4699-3p         | 1 |
| <i>circGRHPR</i> | miR-4699-5p         | 2 |
| <i>circGRHPR</i> | miR-4709-3p         | 1 |
| <i>circGRHPR</i> | miR-4709-5p         | 1 |
| <i>circGRHPR</i> | miR-4713-3p         | 1 |
| <i>circGRHPR</i> | miR-4713-5p         | 2 |
| <i>circGRHPR</i> | miR-4715-3p         | 1 |
| <i>circGRHPR</i> | miR-4717-3p         | 1 |
| <i>circGRHPR</i> | miR-4722-3p/6727-3p | 2 |
| <i>circGRHPR</i> | miR-4724-5p         | 1 |
| <i>circGRHPR</i> | miR-4727-5p         | 1 |
| <i>circGRHPR</i> | miR-4731-5p         | 2 |
| <i>circGRHPR</i> | miR-4732-3p         | 1 |
| <i>circGRHPR</i> | miR-4733-5p         | 3 |
| <i>circGRHPR</i> | miR-4736            | 3 |
| <i>circGRHPR</i> | miR-4737            | 2 |
| <i>circGRHPR</i> | miR-4739            | 2 |
| <i>circGRHPR</i> | miR-4740-5p         | 1 |
| <i>circGRHPR</i> | miR-4746-3p         | 2 |
| <i>circGRHPR</i> | miR-4747-3p         | 1 |
| <i>circGRHPR</i> | miR-4749-3p         | 1 |
| <i>circGRHPR</i> | miR-4750-3p         | 1 |
| <i>circGRHPR</i> | miR-4752            | 1 |
| <i>circGRHPR</i> | miR-4755-3p         | 1 |
| <i>circGRHPR</i> | miR-4757-5p/6744-3p | 2 |
| <i>circGRHPR</i> | miR-4760-5p/8061    | 1 |
| <i>circGRHPR</i> | miR-4761-5p         | 1 |
| <i>circGRHPR</i> | miR-4762-3p         | 2 |
| <i>circGRHPR</i> | miR-4762-5p         | 1 |

|                  |                             |   |
|------------------|-----------------------------|---|
| <i>circGRHPR</i> | miR-4763-5p                 | 1 |
| <i>circGRHPR</i> | miR-4766-5p                 | 1 |
| <i>circGRHPR</i> | miR-4768-5p/6833-3p         | 1 |
| <i>circGRHPR</i> | miR-4769-3p/6817-5p         | 1 |
| <i>circGRHPR</i> | miR-4772-5p                 | 1 |
| <i>circGRHPR</i> | miR-4778-3p                 | 4 |
| <i>circGRHPR</i> | miR-4779                    | 1 |
| <i>circGRHPR</i> | miR-4790-3p                 | 1 |
| <i>circGRHPR</i> | miR-4800-5p                 | 1 |
| <i>circGRHPR</i> | miR-4802-3p                 | 2 |
| <i>circGRHPR</i> | miR-4802-5p                 | 1 |
| <i>circGRHPR</i> | miR-488-3p                  | 1 |
| <i>circGRHPR</i> | miR-488-5p                  | 1 |
| <i>circGRHPR</i> | miR-490-5p                  | 1 |
| <i>circGRHPR</i> | miR-491-5p                  | 1 |
| <i>circGRHPR</i> | miR-494-3p                  | 1 |
| <i>circGRHPR</i> | miR-495-3p                  | 1 |
| <i>circGRHPR</i> | miR-498                     | 1 |
| <i>circGRHPR</i> | miR-4999-3p                 | 1 |
| <i>circGRHPR</i> | miR-499a-3p/499b-3p         | 1 |
| <i>circGRHPR</i> | miR-5000-3p                 | 2 |
| <i>circGRHPR</i> | miR-5001-3p                 | 1 |
| <i>circGRHPR</i> | miR-5002-3p                 | 3 |
| <i>circGRHPR</i> | miR-5006-5p                 | 1 |
| <i>circGRHPR</i> | miR-5008-3p/6737-3p/7157-3p | 1 |
| <i>circGRHPR</i> | miR-502-5p                  | 1 |
| <i>circGRHPR</i> | miR-504-3p                  | 2 |
| <i>circGRHPR</i> | miR-505-3p.2                | 1 |
| <i>circGRHPR</i> | miR-5088-3p                 | 1 |
| <i>circGRHPR</i> | miR-5089-3p                 | 1 |
| <i>circGRHPR</i> | miR-509-3p                  | 2 |
| <i>circGRHPR</i> | miR-5091                    | 1 |
| <i>circGRHPR</i> | miR-513b-3p                 | 1 |
| <i>circGRHPR</i> | miR-517-5p                  | 2 |
| <i>circGRHPR</i> | miR-5186                    | 2 |
| <i>circGRHPR</i> | miR-5187-3p                 | 2 |
| <i>circGRHPR</i> | miR-5187-5p                 | 1 |
| <i>circGRHPR</i> | miR-5189-3p                 | 2 |

|                  |                                                                  |   |
|------------------|------------------------------------------------------------------|---|
| <i>circGRHPR</i> | miR-5192                                                         | 1 |
| <i>circGRHPR</i> | miR-5195-5p                                                      | 1 |
| <i>circGRHPR</i> | miR-5197-5p                                                      | 1 |
| <i>circGRHPR</i> | miR-525-5p                                                       | 1 |
| <i>circGRHPR</i> | miR-526b-5p                                                      | 2 |
| <i>circGRHPR</i> | miR-532-3p                                                       | 1 |
| <i>circGRHPR</i> | miR-541-5p                                                       | 2 |
| <i>circGRHPR</i> | miR-545-3p                                                       | 1 |
| <i>circGRHPR</i> | miR-545-5p                                                       | 1 |
| <i>circGRHPR</i> | miR-548ac/548bb-3p/548d-3p/548h-3p/548z                          | 2 |
| <i>circGRHPR</i> | miR-548ad-3p                                                     | 1 |
| <i>circGRHPR</i> | miR-548ai/548ag/548ba/570-5p                                     | 1 |
| <i>circGRHPR</i> | miR-548aq-3p/548am-3p/548aj-3p/548ah-3p/548ae-3p/548j-3p/548x-3p | 2 |
| <i>circGRHPR</i> | miR-548au-3p                                                     | 1 |
| <i>circGRHPR</i> | miR-548g-3p                                                      | 2 |
| <i>circGRHPR</i> | miR-548q                                                         | 1 |
| <i>circGRHPR</i> | miR-551b-5p                                                      | 1 |
| <i>circGRHPR</i> | miR-553                                                          | 1 |
| <i>circGRHPR</i> | miR-556-5p                                                       | 1 |
| <i>circGRHPR</i> | miR-5581-3p                                                      | 1 |
| <i>circGRHPR</i> | miR-5586-5p                                                      | 1 |
| <i>circGRHPR</i> | miR-5588-3p                                                      | 1 |
| <i>circGRHPR</i> | miR-5589-3p                                                      | 1 |
| <i>circGRHPR</i> | miR-5589-5p                                                      | 2 |
| <i>circGRHPR</i> | miR-5591-3p                                                      | 1 |
| <i>circGRHPR</i> | miR-561-5p                                                       | 1 |
| <i>circGRHPR</i> | miR-562                                                          | 2 |
| <i>circGRHPR</i> | miR-5681a                                                        | 1 |
| <i>circGRHPR</i> | miR-5681b                                                        | 1 |
| <i>circGRHPR</i> | miR-5683                                                         | 1 |
| <i>circGRHPR</i> | miR-5694                                                         | 1 |
| <i>circGRHPR</i> | miR-5697                                                         | 1 |
| <i>circGRHPR</i> | miR-5701                                                         | 2 |
| <i>circGRHPR</i> | miR-5704                                                         | 1 |
| <i>circGRHPR</i> | miR-5739                                                         | 1 |
| <i>circGRHPR</i> | miR-577                                                          | 1 |
| <i>circGRHPR</i> | miR-578                                                          | 2 |
| <i>circGRHPR</i> | miR-582-3p                                                       | 1 |

|                  |                     |   |
|------------------|---------------------|---|
| <i>circGRHPR</i> | miR-587             | 1 |
| <i>circGRHPR</i> | miR-589-3p          | 1 |
| <i>circGRHPR</i> | miR-6068            | 2 |
| <i>circGRHPR</i> | miR-6072/6891-3p    | 2 |
| <i>circGRHPR</i> | miR-6077            | 1 |
| <i>circGRHPR</i> | miR-6079            | 2 |
| <i>circGRHPR</i> | miR-608/4651        | 2 |
| <i>circGRHPR</i> | miR-609             | 2 |
| <i>circGRHPR</i> | miR-6132/6836-5p    | 3 |
| <i>circGRHPR</i> | miR-6165            | 3 |
| <i>circGRHPR</i> | miR-619-5p/6506-5p  | 1 |
| <i>circGRHPR</i> | miR-625-3p          | 1 |
| <i>circGRHPR</i> | miR-628-5p          | 2 |
| <i>circGRHPR</i> | miR-629-3p          | 1 |
| <i>circGRHPR</i> | miR-629-5p          | 1 |
| <i>circGRHPR</i> | miR-631/3661        | 1 |
| <i>circGRHPR</i> | miR-637             | 3 |
| <i>circGRHPR</i> | miR-638             | 1 |
| <i>circGRHPR</i> | miR-642a-5p         | 1 |
| <i>circGRHPR</i> | miR-645             | 1 |
| <i>circGRHPR</i> | miR-6501-3p         | 1 |
| <i>circGRHPR</i> | miR-6507-5p         | 1 |
| <i>circGRHPR</i> | miR-6510-5p         | 3 |
| <i>circGRHPR</i> | miR-6513-3p         | 2 |
| <i>circGRHPR</i> | miR-6514-3p         | 1 |
| <i>circGRHPR</i> | miR-6514-5p         | 1 |
| <i>circGRHPR</i> | miR-6515-3p         | 1 |
| <i>circGRHPR</i> | miR-653-5p          | 1 |
| <i>circGRHPR</i> | miR-654-3p          | 1 |
| <i>circGRHPR</i> | miR-657             | 2 |
| <i>circGRHPR</i> | miR-662             | 1 |
| <i>circGRHPR</i> | miR-670-3p          | 3 |
| <i>circGRHPR</i> | miR-670-5p          | 1 |
| <i>circGRHPR</i> | miR-671-5p          | 1 |
| <i>circGRHPR</i> | miR-6721-5p         | 1 |
| <i>circGRHPR</i> | miR-6724-5p/6773-5p | 1 |
| <i>circGRHPR</i> | miR-6730-5p         | 1 |
| <i>circGRHPR</i> | miR-6731-5p/8085    | 2 |

|                  |                             |   |
|------------------|-----------------------------|---|
| <i>circGRHPR</i> | miR-6736-3p                 | 1 |
| <i>circGRHPR</i> | miR-6737-5p/6812-5p/6819-5p | 3 |
| <i>circGRHPR</i> | miR-6742-5p                 | 1 |
| <i>circGRHPR</i> | miR-6747-3p                 | 2 |
| <i>circGRHPR</i> | miR-6747-5p                 | 2 |
| <i>circGRHPR</i> | miR-6752-3p                 | 1 |
| <i>circGRHPR</i> | miR-6757-5p                 | 2 |
| <i>circGRHPR</i> | miR-6758-3p                 | 1 |
| <i>circGRHPR</i> | miR-6759-5p                 | 1 |
| <i>circGRHPR</i> | miR-676-5p                  | 1 |
| <i>circGRHPR</i> | miR-6760-3p                 | 1 |
| <i>circGRHPR</i> | miR-6760-5p                 | 2 |
| <i>circGRHPR</i> | miR-6765-3p                 | 1 |
| <i>circGRHPR</i> | miR-6767-3p                 | 1 |
| <i>circGRHPR</i> | miR-6768-5p                 | 1 |
| <i>circGRHPR</i> | miR-6772-3p                 | 1 |
| <i>circGRHPR</i> | miR-6772-5p                 | 2 |
| <i>circGRHPR</i> | miR-6773-3p                 | 2 |
| <i>circGRHPR</i> | miR-6778-3p                 | 2 |
| <i>circGRHPR</i> | miR-6780a-3p                | 1 |
| <i>circGRHPR</i> | miR-6782-3p                 | 1 |
| <i>circGRHPR</i> | miR-6786-5p                 | 2 |
| <i>circGRHPR</i> | miR-6791-3p/6829-3p         | 2 |
| <i>circGRHPR</i> | miR-6795-3p                 | 2 |
| <i>circGRHPR</i> | miR-6796-3p                 | 1 |
| <i>circGRHPR</i> | miR-6796-5p                 | 1 |
| <i>circGRHPR</i> | miR-6801-3p/6810-3p         | 1 |
| <i>circGRHPR</i> | miR-6809-3p                 | 1 |
| <i>circGRHPR</i> | miR-6810-5p                 | 1 |
| <i>circGRHPR</i> | miR-6812-3p                 | 1 |
| <i>circGRHPR</i> | miR-6814-5p                 | 1 |
| <i>circGRHPR</i> | miR-6815-5p/6865-5p         | 2 |
| <i>circGRHPR</i> | miR-6817-3p                 | 2 |
| <i>circGRHPR</i> | miR-6819-3p/6877-3p         | 1 |
| <i>circGRHPR</i> | miR-6820-5p                 | 2 |
| <i>circGRHPR</i> | miR-6823-5p                 | 1 |
| <i>circGRHPR</i> | miR-6828-5p                 | 1 |
| <i>circGRHPR</i> | miR-6833-5p                 | 1 |

|                  |             |   |
|------------------|-------------|---|
| <i>circGRHPR</i> | miR-6837-3p | 1 |
| <i>circGRHPR</i> | miR-6838-3p | 1 |
| <i>circGRHPR</i> | miR-6840-5p | 1 |
| <i>circGRHPR</i> | miR-6844    | 1 |
| <i>circGRHPR</i> | miR-6847-3p | 1 |
| <i>circGRHPR</i> | miR-6851-3p | 1 |
| <i>circGRHPR</i> | miR-6854-5p | 1 |
| <i>circGRHPR</i> | miR-6857-3p | 1 |
| <i>circGRHPR</i> | miR-6857-5p | 1 |
| <i>circGRHPR</i> | miR-6867-3p | 2 |
| <i>circGRHPR</i> | miR-6870-3p | 2 |
| <i>circGRHPR</i> | miR-6873-3p | 2 |
| <i>circGRHPR</i> | miR-6875-3p | 1 |
| <i>circGRHPR</i> | miR-6878-3p | 2 |
| <i>circGRHPR</i> | miR-6878-5p | 2 |
| <i>circGRHPR</i> | miR-6881-3p | 1 |
| <i>circGRHPR</i> | miR-6882-5p | 1 |
| <i>circGRHPR</i> | miR-6885-3p | 2 |
| <i>circGRHPR</i> | miR-6886-3p | 1 |
| <i>circGRHPR</i> | miR-6887-3p | 2 |
| <i>circGRHPR</i> | miR-6888-3p | 2 |
| <i>circGRHPR</i> | miR-6889-3p | 1 |
| <i>circGRHPR</i> | miR-6892-3p | 2 |
| <i>circGRHPR</i> | miR-6894-3p | 1 |
| <i>circGRHPR</i> | miR-7-3p    | 1 |
| <i>circGRHPR</i> | miR-7-5p    | 1 |
| <i>circGRHPR</i> | miR-7106-3p | 1 |
| <i>circGRHPR</i> | miR-7108-3p | 1 |
| <i>circGRHPR</i> | miR-7110-3p | 2 |
| <i>circGRHPR</i> | miR-7111-3p | 1 |
| <i>circGRHPR</i> | miR-7112-5p | 1 |
| <i>circGRHPR</i> | miR-7113-3p | 2 |
| <i>circGRHPR</i> | miR-7150    | 1 |
| <i>circGRHPR</i> | miR-7155-5p | 3 |
| <i>circGRHPR</i> | miR-7156-3p | 1 |
| <i>circGRHPR</i> | miR-7159-3p | 1 |
| <i>circGRHPR</i> | miR-7159-5p | 1 |
| <i>circGRHPR</i> | miR-7641    | 1 |

|                   |                         |   |
|-------------------|-------------------------|---|
| <i>circGRHPR</i>  | miR-766-3p              | 1 |
| <i>circGRHPR</i>  | miR-7845-5p             | 1 |
| <i>circGRHPR</i>  | miR-7850-5p             | 1 |
| <i>circGRHPR</i>  | miR-7978                | 1 |
| <i>circGRHPR</i>  | miR-802                 | 1 |
| <i>circGRHPR</i>  | miR-8055                | 2 |
| <i>circGRHPR</i>  | miR-8066                | 1 |
| <i>circGRHPR</i>  | miR-8075                | 2 |
| <i>circGRHPR</i>  | miR-873-3p              | 2 |
| <i>circGRHPR</i>  | miR-873-5p.1            | 1 |
| <i>circGRHPR</i>  | miR-874-5p              | 3 |
| <i>circGRHPR</i>  | miR-876-3p              | 5 |
| <i>circGRHPR</i>  | miR-877-3p              | 1 |
| <i>circGRHPR</i>  | miR-888-3p              | 1 |
| <i>circGRHPR</i>  | miR-888-5p              | 1 |
| <i>circGRHPR</i>  | miR-9-5p                | 1 |
| <i>circGRHPR</i>  | miR-93-3p               | 2 |
| <i>circGRHPR</i>  | miR-934                 | 1 |
| <i>circGRHPR</i>  | miR-938                 | 1 |
| <i>circGRHPR</i>  | miR-940/6808-5p/6893-5p | 1 |
| <i>circGRHPR</i>  | miR-942-3p              | 1 |
| <i>circGRHPR</i>  | miR-942-5p              | 1 |
| <i>circGRHPR</i>  | miR-943                 | 1 |
| <i>circGRHPR</i>  | miR-96-5p/1271-5p       | 1 |
| <i>circGRHPR</i>  | miR-99-3p               | 1 |
| <i>circGRIN2B</i> | miR-100-3p              | 1 |
| <i>circGRIN2B</i> | miR-103-3p/107          | 1 |
| <i>circGRIN2B</i> | miR-103a-2-5p           | 1 |
| <i>circGRIN2B</i> | miR-1178-3p             | 1 |
| <i>circGRIN2B</i> | miR-1183                | 1 |
| <i>circGRIN2B</i> | miR-1199-5p/6751-3p     | 2 |
| <i>circGRIN2B</i> | miR-1207-5p/4763-3p     | 1 |
| <i>circGRIN2B</i> | miR-1225-3p             | 1 |
| <i>circGRIN2B</i> | miR-1231                | 1 |
| <i>circGRIN2B</i> | miR-1233-3p             | 1 |
| <i>circGRIN2B</i> | miR-1236-5p             | 1 |
| <i>circGRIN2B</i> | miR-1243                | 1 |
| <i>circGRIN2B</i> | miR-125-5p              | 1 |



|                   |                     |   |
|-------------------|---------------------|---|
| <i>circGRIN2B</i> | miR-1251-3p         | 1 |
| <i>circGRIN2B</i> | miR-1253            | 1 |
| <i>circGRIN2B</i> | miR-1255b-2-3p      | 1 |
| <i>circGRIN2B</i> | miR-1263            | 1 |
| <i>circGRIN2B</i> | miR-1270            | 1 |
| <i>circGRIN2B</i> | miR-1272            | 1 |
| <i>circGRIN2B</i> | miR-1273f           | 1 |
| <i>circGRIN2B</i> | miR-1273g-3p        | 2 |
| <i>circGRIN2B</i> | miR-128-3p          | 1 |
| <i>circGRIN2B</i> | miR-1284            | 1 |
| <i>circGRIN2B</i> | miR-1296-5p         | 1 |
| <i>circGRIN2B</i> | miR-1298-5p         | 1 |
| <i>circGRIN2B</i> | miR-1302/4298       | 1 |
| <i>circGRIN2B</i> | miR-1306-5p         | 2 |
| <i>circGRIN2B</i> | miR-1322            | 1 |
| <i>circGRIN2B</i> | miR-1324            | 1 |
| <i>circGRIN2B</i> | miR-134-3p          | 1 |
| <i>circGRIN2B</i> | miR-135-5p          | 1 |
| <i>circGRIN2B</i> | miR-136-5p          | 1 |
| <i>circGRIN2B</i> | miR-138-1-3p        | 2 |
| <i>circGRIN2B</i> | miR-138-2-3p        | 1 |
| <i>circGRIN2B</i> | miR-139-3p          | 1 |
| <i>circGRIN2B</i> | miR-141-5p          | 1 |
| <i>circGRIN2B</i> | miR-142-5p          | 1 |
| <i>circGRIN2B</i> | miR-143-3p          | 1 |
| <i>circGRIN2B</i> | miR-145-5p          | 1 |
| <i>circGRIN2B</i> | miR-148-3p/152-3p   | 1 |
| <i>circGRIN2B</i> | miR-149-5p          | 2 |
| <i>circGRIN2B</i> | miR-150-3p          | 1 |
| <i>circGRIN2B</i> | miR-1539            | 1 |
| <i>circGRIN2B</i> | miR-154-3p/487-3p   | 1 |
| <i>circGRIN2B</i> | miR-155-3p          | 1 |
| <i>circGRIN2B</i> | miR-155-5p          | 1 |
| <i>circGRIN2B</i> | miR-1587/3620-5p    | 2 |
| <i>circGRIN2B</i> | miR-15b-3p          | 1 |
| <i>circGRIN2B</i> | miR-187-5p          | 2 |
| <i>circGRIN2B</i> | miR-188-5p          | 1 |
| <i>circGRIN2B</i> | miR-1909-3p/6722-3p | 1 |

|                   |                                              |   |
|-------------------|----------------------------------------------|---|
| <i>circGRIN2B</i> | miR-193-3p                                   | 1 |
| <i>circGRIN2B</i> | miR-197-3p                                   | 2 |
| <i>circGRIN2B</i> | miR-199-3p                                   | 1 |
| <i>circGRIN2B</i> | miR-204-3p/4646-5p                           | 1 |
| <i>circGRIN2B</i> | miR-208-5p                                   | 1 |
| <i>circGRIN2B</i> | miR-21-3p/3591-3p                            | 1 |
| <i>circGRIN2B</i> | miR-2113                                     | 1 |
| <i>circGRIN2B</i> | miR-2115-5p                                  | 1 |
| <i>circGRIN2B</i> | miR-2116-5p                                  | 1 |
| <i>circGRIN2B</i> | miR-219a-2-3p                                | 1 |
| <i>circGRIN2B</i> | miR-219b-3p                                  | 1 |
| <i>circGRIN2B</i> | miR-22-5p                                    | 1 |
| <i>circGRIN2B</i> | miR-221-3p/222-3p                            | 1 |
| <i>circGRIN2B</i> | miR-221-5p/8073                              | 1 |
| <i>circGRIN2B</i> | miR-222-5p                                   | 1 |
| <i>circGRIN2B</i> | miR-2355-5p                                  | 1 |
| <i>circGRIN2B</i> | miR-24-3p                                    | 1 |
| <i>circGRIN2B</i> | miR-2681-3p                                  | 1 |
| <i>circGRIN2B</i> | miR-29-3p                                    | 1 |
| <i>circGRIN2B</i> | miR-30-5p                                    | 1 |
| <i>circGRIN2B</i> | miR-302f                                     | 1 |
| <i>circGRIN2B</i> | miR-3064-3p                                  | 1 |
| <i>circGRIN2B</i> | miR-3065-3p                                  | 1 |
| <i>circGRIN2B</i> | miR-30b-3p/1273h-5p/3689-3p/6779-5p/6780a-5p | 1 |
| <i>circGRIN2B</i> | miR-30c-3p/6788-5p                           | 1 |
| <i>circGRIN2B</i> | miR-31-3p                                    | 1 |
| <i>circGRIN2B</i> | miR-3120-3p                                  | 1 |
| <i>circGRIN2B</i> | miR-3120-5p                                  | 1 |
| <i>circGRIN2B</i> | miR-3123                                     | 1 |
| <i>circGRIN2B</i> | miR-3125/3916/6859-5p                        | 1 |
| <i>circGRIN2B</i> | miR-3134                                     | 2 |
| <i>circGRIN2B</i> | miR-3136-3p/7155-3p                          | 1 |
| <i>circGRIN2B</i> | miR-3136-5p/4439                             | 2 |
| <i>circGRIN2B</i> | miR-3150b-3p                                 | 1 |
| <i>circGRIN2B</i> | miR-3156-5p                                  | 2 |
| <i>circGRIN2B</i> | miR-3158-3p                                  | 1 |
| <i>circGRIN2B</i> | miR-3169                                     | 1 |
| <i>circGRIN2B</i> | miR-3174                                     | 1 |

|                   |                           |   |
|-------------------|---------------------------|---|
| <i>circGRIN2B</i> | miR-3180-5p               | 1 |
| <i>circGRIN2B</i> | miR-3182                  | 1 |
| <i>circGRIN2B</i> | miR-3185                  | 2 |
| <i>circGRIN2B</i> | miR-3187-3p               | 1 |
| <i>circGRIN2B</i> | miR-3189-5p               | 1 |
| <i>circGRIN2B</i> | miR-3191-5p               | 1 |
| <i>circGRIN2B</i> | miR-3192-5p               | 1 |
| <i>circGRIN2B</i> | miR-3199/8052             | 1 |
| <i>circGRIN2B</i> | miR-328-3p                | 1 |
| <i>circGRIN2B</i> | miR-330-3p                | 1 |
| <i>circGRIN2B</i> | miR-330-3p.2              | 1 |
| <i>circGRIN2B</i> | miR-33b-3p/515-3p/519e-3p | 1 |
| <i>circGRIN2B</i> | miR-345-5p                | 1 |
| <i>circGRIN2B</i> | miR-34a-3p                | 1 |
| <i>circGRIN2B</i> | miR-3529-3p               | 1 |
| <i>circGRIN2B</i> | miR-3607-3p               | 1 |
| <i>circGRIN2B</i> | miR-3617-3p               | 1 |
| <i>circGRIN2B</i> | miR-3620-3p               | 1 |
| <i>circGRIN2B</i> | miR-3652/4430             | 1 |
| <i>circGRIN2B</i> | miR-3654                  | 1 |
| <i>circGRIN2B</i> | miR-365a-5p/365b-5p       | 1 |
| <i>circGRIN2B</i> | miR-3660/4526             | 1 |
| <i>circGRIN2B</i> | miR-3663-3p               | 1 |
| <i>circGRIN2B</i> | miR-3675-3p               | 1 |
| <i>circGRIN2B</i> | miR-3677-5p               | 1 |
| <i>circGRIN2B</i> | miR-3679-3p               | 1 |
| <i>circGRIN2B</i> | miR-3686                  | 1 |
| <i>circGRIN2B</i> | miR-3688-3p               | 2 |
| <i>circGRIN2B</i> | miR-3688-5p               | 1 |
| <i>circGRIN2B</i> | miR-3689d/6851-5p         | 1 |
| <i>circGRIN2B</i> | miR-3690                  | 1 |
| <i>circGRIN2B</i> | miR-3691-5p               | 1 |
| <i>circGRIN2B</i> | miR-3692-5p               | 1 |
| <i>circGRIN2B</i> | miR-371a-3p               | 1 |
| <i>circGRIN2B</i> | miR-371b-3p               | 1 |
| <i>circGRIN2B</i> | miR-378-3p                | 2 |
| <i>circGRIN2B</i> | miR-378g                  | 1 |
| <i>circGRIN2B</i> | miR-382-3p                | 1 |

|                   |                    |   |
|-------------------|--------------------|---|
| <i>circGRIN2B</i> | miR-383-3p         | 1 |
| <i>circGRIN2B</i> | miR-3909           | 1 |
| <i>circGRIN2B</i> | miR-3925-5p        | 1 |
| <i>circGRIN2B</i> | miR-3926           | 1 |
| <i>circGRIN2B</i> | miR-3943           | 1 |
| <i>circGRIN2B</i> | miR-3977           | 1 |
| <i>circGRIN2B</i> | miR-421            | 1 |
| <i>circGRIN2B</i> | miR-4254           | 1 |
| <i>circGRIN2B</i> | miR-4256           | 1 |
| <i>circGRIN2B</i> | miR-4258           | 1 |
| <i>circGRIN2B</i> | miR-4263           | 1 |
| <i>circGRIN2B</i> | miR-4264           | 1 |
| <i>circGRIN2B</i> | miR-4265/4296/4322 | 1 |
| <i>circGRIN2B</i> | miR-4273/7156-5p   | 1 |
| <i>circGRIN2B</i> | miR-4274           | 1 |
| <i>circGRIN2B</i> | miR-4284           | 1 |
| <i>circGRIN2B</i> | miR-4286           | 1 |
| <i>circGRIN2B</i> | miR-4292/6791-5p   | 2 |
| <i>circGRIN2B</i> | miR-4299           | 1 |
| <i>circGRIN2B</i> | miR-4301           | 1 |
| <i>circGRIN2B</i> | miR-4303           | 1 |
| <i>circGRIN2B</i> | miR-4308           | 2 |
| <i>circGRIN2B</i> | miR-4323           | 1 |
| <i>circGRIN2B</i> | miR-4324           | 1 |
| <i>circGRIN2B</i> | miR-4328           | 1 |
| <i>circGRIN2B</i> | miR-4417           | 1 |
| <i>circGRIN2B</i> | miR-4422           | 1 |
| <i>circGRIN2B</i> | miR-4433b-5p       | 1 |
| <i>circGRIN2B</i> | miR-4435           | 1 |
| <i>circGRIN2B</i> | miR-4437           | 1 |
| <i>circGRIN2B</i> | miR-4446-3p        | 1 |
| <i>circGRIN2B</i> | miR-4446-5p        | 1 |
| <i>circGRIN2B</i> | miR-4450           | 1 |
| <i>circGRIN2B</i> | miR-4454           | 1 |
| <i>circGRIN2B</i> | miR-4456           | 1 |
| <i>circGRIN2B</i> | miR-4461           | 1 |
| <i>circGRIN2B</i> | miR-4476/6876-5p   | 1 |
| <i>circGRIN2B</i> | miR-4482-3p        | 1 |

|                   |                       |   |
|-------------------|-----------------------|---|
| <i>circGRIN2B</i> | miR-4486              | 1 |
| <i>circGRIN2B</i> | miR-4490              | 1 |
| <i>circGRIN2B</i> | miR-4505/5787         | 1 |
| <i>circGRIN2B</i> | miR-4506              | 1 |
| <i>circGRIN2B</i> | miR-4517              | 1 |
| <i>circGRIN2B</i> | miR-4519              | 1 |
| <i>circGRIN2B</i> | miR-451b              | 1 |
| <i>circGRIN2B</i> | miR-452-3p            | 1 |
| <i>circGRIN2B</i> | miR-4520-3p           | 1 |
| <i>circGRIN2B</i> | miR-4531              | 1 |
| <i>circGRIN2B</i> | miR-4534/8082         | 2 |
| <i>circGRIN2B</i> | miR-4633-3p/6500-5p   | 1 |
| <i>circGRIN2B</i> | miR-4638-3p           | 2 |
| <i>circGRIN2B</i> | miR-4641              | 1 |
| <i>circGRIN2B</i> | miR-4653-3p           | 1 |
| <i>circGRIN2B</i> | miR-4656              | 2 |
| <i>circGRIN2B</i> | miR-4659a-3p/4659b-3p | 2 |
| <i>circGRIN2B</i> | miR-4659a-5p/4659b-5p | 1 |
| <i>circGRIN2B</i> | miR-4674              | 2 |
| <i>circGRIN2B</i> | miR-4675/4741         | 2 |
| <i>circGRIN2B</i> | miR-4677-5p           | 1 |
| <i>circGRIN2B</i> | miR-4683              | 1 |
| <i>circGRIN2B</i> | miR-4691-5p/6792-3p   | 2 |
| <i>circGRIN2B</i> | miR-4693-5p           | 1 |
| <i>circGRIN2B</i> | miR-4695-5p           | 1 |
| <i>circGRIN2B</i> | miR-4708-5p           | 1 |
| <i>circGRIN2B</i> | miR-4716-5p           | 1 |
| <i>circGRIN2B</i> | miR-4728-3p           | 1 |
| <i>circGRIN2B</i> | miR-4731-5p           | 1 |
| <i>circGRIN2B</i> | miR-4732-3p           | 1 |
| <i>circGRIN2B</i> | miR-4734              | 1 |
| <i>circGRIN2B</i> | miR-4736              | 1 |
| <i>circGRIN2B</i> | miR-4738-3p           | 1 |
| <i>circGRIN2B</i> | miR-4742-3p           | 1 |
| <i>circGRIN2B</i> | miR-4754              | 1 |
| <i>circGRIN2B</i> | miR-4755-5p/5006-3p   | 1 |
| <i>circGRIN2B</i> | miR-4757-5p/6744-3p   | 1 |
| <i>circGRIN2B</i> | miR-4758-3p           | 1 |

|                   |                             |   |
|-------------------|-----------------------------|---|
| <i>circGRIN2B</i> | miR-4759                    | 1 |
| <i>circGRIN2B</i> | miR-4762-3p                 | 1 |
| <i>circGRIN2B</i> | miR-4763-5p                 | 1 |
| <i>circGRIN2B</i> | miR-4765                    | 1 |
| <i>circGRIN2B</i> | miR-4774-5p                 | 1 |
| <i>circGRIN2B</i> | miR-4776-3p                 | 1 |
| <i>circGRIN2B</i> | miR-4778-3p                 | 1 |
| <i>circGRIN2B</i> | miR-4779                    | 1 |
| <i>circGRIN2B</i> | miR-4786-3p                 | 1 |
| <i>circGRIN2B</i> | miR-4790-3p                 | 1 |
| <i>circGRIN2B</i> | miR-4795-5p                 | 1 |
| <i>circGRIN2B</i> | miR-4796-3p                 | 1 |
| <i>circGRIN2B</i> | miR-4797-3p                 | 1 |
| <i>circGRIN2B</i> | miR-4802-5p                 | 1 |
| <i>circGRIN2B</i> | miR-4804-5p                 | 1 |
| <i>circGRIN2B</i> | miR-489-3p                  | 1 |
| <i>circGRIN2B</i> | miR-490-5p                  | 1 |
| <i>circGRIN2B</i> | miR-499a-3p/499b-3p         | 1 |
| <i>circGRIN2B</i> | miR-5000-3p                 | 1 |
| <i>circGRIN2B</i> | miR-5007-3p                 | 1 |
| <i>circGRIN2B</i> | miR-500a-5p                 | 1 |
| <i>circGRIN2B</i> | miR-500b-3p                 | 1 |
| <i>circGRIN2B</i> | miR-5010-3p                 | 1 |
| <i>circGRIN2B</i> | miR-505-3p.2                | 1 |
| <i>circGRIN2B</i> | miR-5088-5p                 | 1 |
| <i>circGRIN2B</i> | miR-512-5p                  | 1 |
| <i>circGRIN2B</i> | miR-516a-3p/516b-3p/7162-5p | 1 |
| <i>circGRIN2B</i> | miR-517-3p                  | 1 |
| <i>circGRIN2B</i> | miR-5186                    | 1 |
| <i>circGRIN2B</i> | miR-5189-3p                 | 1 |
| <i>circGRIN2B</i> | miR-5193                    | 1 |
| <i>circGRIN2B</i> | miR-5197-3p                 | 1 |
| <i>circGRIN2B</i> | miR-520g-5p                 | 1 |
| <i>circGRIN2B</i> | miR-525-5p                  | 1 |
| <i>circGRIN2B</i> | miR-544b                    | 1 |
| <i>circGRIN2B</i> | miR-545-3p                  | 1 |
| <i>circGRIN2B</i> | miR-548e-5p                 | 1 |
| <i>circGRIN2B</i> | miR-548q                    | 1 |

|                   |                                      |   |
|-------------------|--------------------------------------|---|
| <i>circGRIN2B</i> | miR-548s                             | 1 |
| <i>circGRIN2B</i> | miR-548v                             | 1 |
| <i>circGRIN2B</i> | miR-550a-3-5p/550a-5p/1271-3p        | 1 |
| <i>circGRIN2B</i> | miR-5579-3p                          | 1 |
| <i>circGRIN2B</i> | miR-5581-3p                          | 1 |
| <i>circGRIN2B</i> | miR-5583-3p                          | 1 |
| <i>circGRIN2B</i> | miR-5586-3p                          | 1 |
| <i>circGRIN2B</i> | miR-5586-5p                          | 1 |
| <i>circGRIN2B</i> | miR-5589-5p                          | 1 |
| <i>circGRIN2B</i> | miR-5590-5p                          | 1 |
| <i>circGRIN2B</i> | miR-5699-5p                          | 1 |
| <i>circGRIN2B</i> | miR-573/3616-5p                      | 1 |
| <i>circGRIN2B</i> | miR-576-5p                           | 1 |
| <i>circGRIN2B</i> | miR-580-3p                           | 1 |
| <i>circGRIN2B</i> | miR-588                              | 1 |
| <i>circGRIN2B</i> | miR-600                              | 1 |
| <i>circGRIN2B</i> | miR-607                              | 1 |
| <i>circGRIN2B</i> | miR-6077                             | 2 |
| <i>circGRIN2B</i> | miR-6079                             | 1 |
| <i>circGRIN2B</i> | miR-6090                             | 1 |
| <i>circGRIN2B</i> | miR-610                              | 1 |
| <i>circGRIN2B</i> | miR-612/1285-3p/3187-5p/5189-5p/6860 | 1 |
| <i>circGRIN2B</i> | miR-6132/6836-5p                     | 1 |
| <i>circGRIN2B</i> | miR-619-5p/6506-5p                   | 1 |
| <i>circGRIN2B</i> | miR-622                              | 1 |
| <i>circGRIN2B</i> | miR-626/6876-3p                      | 1 |
| <i>circGRIN2B</i> | miR-627-3p                           | 1 |
| <i>circGRIN2B</i> | miR-632/4288                         | 1 |
| <i>circGRIN2B</i> | miR-642-3p                           | 1 |
| <i>circGRIN2B</i> | miR-642b-5p                          | 1 |
| <i>circGRIN2B</i> | miR-6503-3p                          | 1 |
| <i>circGRIN2B</i> | miR-6505-5p                          | 1 |
| <i>circGRIN2B</i> | miR-6507-5p                          | 1 |
| <i>circGRIN2B</i> | miR-651-3p                           | 1 |
| <i>circGRIN2B</i> | miR-6512-5p                          | 1 |
| <i>circGRIN2B</i> | miR-6514-3p                          | 1 |
| <i>circGRIN2B</i> | miR-6514-5p                          | 1 |
| <i>circGRIN2B</i> | miR-658                              | 1 |

|                   |                     |   |
|-------------------|---------------------|---|
| <i>circGRIN2B</i> | miR-660-3p          | 1 |
| <i>circGRIN2B</i> | miR-662             | 1 |
| <i>circGRIN2B</i> | miR-663b            | 1 |
| <i>circGRIN2B</i> | miR-664a-5p/4794    | 2 |
| <i>circGRIN2B</i> | miR-670-5p          | 3 |
| <i>circGRIN2B</i> | miR-6719-3p         | 1 |
| <i>circGRIN2B</i> | miR-6729-3p         | 1 |
| <i>circGRIN2B</i> | miR-6730-3p         | 1 |
| <i>circGRIN2B</i> | miR-6736-3p         | 1 |
| <i>circGRIN2B</i> | miR-6740-5p         | 1 |
| <i>circGRIN2B</i> | miR-6749-3p         | 2 |
| <i>circGRIN2B</i> | miR-6750-3p         | 1 |
| <i>circGRIN2B</i> | miR-6753-5p         | 1 |
| <i>circGRIN2B</i> | miR-6759-5p         | 1 |
| <i>circGRIN2B</i> | miR-6763-3p         | 1 |
| <i>circGRIN2B</i> | miR-6767-3p         | 1 |
| <i>circGRIN2B</i> | miR-6768-5p         | 1 |
| <i>circGRIN2B</i> | miR-6769a-3p        | 1 |
| <i>circGRIN2B</i> | miR-6770-5p         | 1 |
| <i>circGRIN2B</i> | miR-6778-3p         | 1 |
| <i>circGRIN2B</i> | miR-6783-5p         | 1 |
| <i>circGRIN2B</i> | miR-6791-3p/6829-3p | 1 |
| <i>circGRIN2B</i> | miR-6796-5p         | 1 |
| <i>circGRIN2B</i> | miR-6798-5p         | 1 |
| <i>circGRIN2B</i> | miR-6807-5p         | 1 |
| <i>circGRIN2B</i> | miR-6829-5p         | 2 |
| <i>circGRIN2B</i> | miR-6830-5p         | 1 |
| <i>circGRIN2B</i> | miR-6834-3p         | 1 |
| <i>circGRIN2B</i> | miR-6844            | 1 |
| <i>circGRIN2B</i> | miR-6847-3p         | 1 |
| <i>circGRIN2B</i> | miR-6850-5p         | 1 |
| <i>circGRIN2B</i> | miR-6854-5p         | 1 |
| <i>circGRIN2B</i> | miR-6866-5p         | 1 |
| <i>circGRIN2B</i> | miR-6870-3p         | 1 |
| <i>circGRIN2B</i> | miR-6871-3p         | 1 |
| <i>circGRIN2B</i> | miR-6871-5p         | 1 |
| <i>circGRIN2B</i> | miR-6875-3p         | 2 |
| <i>circGRIN2B</i> | miR-6878-3p         | 1 |



|                   |                              |    |
|-------------------|------------------------------|----|
| <i>circGRIN2B</i> | miR-6879-3p                  | 1  |
| <i>circGRIN2B</i> | miR-6884-3p                  | 2  |
| <i>circGRIN2B</i> | miR-6886-5p                  | 1  |
| <i>circGRIN2B</i> | miR-6890-3p                  | 1  |
| <i>circGRIN2B</i> | miR-6894-3p                  | 1  |
| <i>circGRIN2B</i> | miR-7-3p                     | 1  |
| <i>circGRIN2B</i> | miR-7-5p                     | 2  |
| <i>circGRIN2B</i> | miR-7108-3p                  | 1  |
| <i>circGRIN2B</i> | miR-7150                     | 1  |
| <i>circGRIN2B</i> | miR-7158-5p                  | 2  |
| <i>circGRIN2B</i> | miR-7159-3p                  | 1  |
| <i>circGRIN2B</i> | miR-7159-5p                  | 1  |
| <i>circGRIN2B</i> | miR-759                      | 1  |
| <i>circGRIN2B</i> | miR-762/4492/4498/5001-5p    | 2  |
| <i>circGRIN2B</i> | miR-767-5p                   | 1  |
| <i>circGRIN2B</i> | miR-770-5p                   | 1  |
| <i>circGRIN2B</i> | miR-7705                     | 1  |
| <i>circGRIN2B</i> | miR-7978                     | 1  |
| <i>circGRIN2B</i> | miR-8056                     | 1  |
| <i>circGRIN2B</i> | miR-8074                     | 2  |
| <i>circGRIN2B</i> | miR-8083                     | 1  |
| <i>circGRIN2B</i> | miR-877-3p                   | 1  |
| <i>circGRIN2B</i> | miR-877-5p                   | 1  |
| <i>circGRIN2B</i> | miR-889-5p                   | 1  |
| <i>circGRIN2B</i> | miR-891a-3p                  | 1  |
| <i>circGRIN2B</i> | miR-920/4300/5591-5p/6726-5p | 1  |
| <i>circGRIN2B</i> | miR-93-3p                    | 1  |
| <i>circGRIN2B</i> | miR-935                      | 1  |
| <i>circGRIN2B</i> | miR-936                      | 1  |
| <i>circGRIN2B</i> | miR-942-3p                   | 1  |
| <i>circGRIN2B</i> | miR-943                      | 2  |
| <i>circGRIN2B</i> | miR-96-3p                    | 1  |
| <i>circHDAC9</i>  | miR-1-3p/206                 | 2  |
| <i>circHDAC9</i>  | miR-103a-2-5p                | 10 |
| <i>circHDAC9</i>  | miR-106a-3p                  | 2  |
| <i>circHDAC9</i>  | miR-1178-5p                  | 2  |
| <i>circHDAC9</i>  | miR-1182                     | 2  |
| <i>circHDAC9</i>  | miR-1199-5p/6751-3p          | 4  |

|                  |                     |   |
|------------------|---------------------|---|
| <i>circHDAC9</i> | miR-1200            | 4 |
| <i>circHDAC9</i> | miR-122-5p          | 2 |
| <i>circHDAC9</i> | miR-1225-3p         | 3 |
| <i>circHDAC9</i> | miR-1229-3p         | 3 |
| <i>circHDAC9</i> | miR-124-5p          | 2 |
| <i>circHDAC9</i> | miR-1251-3p         | 1 |
| <i>circHDAC9</i> | miR-1254/3116       | 6 |
| <i>circHDAC9</i> | miR-1261            | 2 |
| <i>circHDAC9</i> | miR-1265            | 3 |
| <i>circHDAC9</i> | miR-1266-3p         | 6 |
| <i>circHDAC9</i> | miR-1267            | 7 |
| <i>circHDAC9</i> | miR-127-5p          | 5 |
| <i>circHDAC9</i> | miR-1270            | 3 |
| <i>circHDAC9</i> | miR-1272            | 1 |
| <i>circHDAC9</i> | miR-1273f           | 4 |
| <i>circHDAC9</i> | miR-1273g-3p        | 5 |
| <i>circHDAC9</i> | miR-1284            | 4 |
| <i>circHDAC9</i> | miR-1287-5p         | 3 |
| <i>circHDAC9</i> | miR-1290            | 2 |
| <i>circHDAC9</i> | miR-1293/4483       | 3 |
| <i>circHDAC9</i> | miR-1299            | 2 |
| <i>circHDAC9</i> | miR-1322            | 1 |
| <i>circHDAC9</i> | miR-1343-3p         | 2 |
| <i>circHDAC9</i> | miR-135-5p          | 3 |
| <i>circHDAC9</i> | miR-135b-3p         | 1 |
| <i>circHDAC9</i> | miR-139-3p          | 1 |
| <i>circHDAC9</i> | miR-140-3p.1        | 3 |
| <i>circHDAC9</i> | miR-143-3p          | 4 |
| <i>circHDAC9</i> | miR-145-3p          | 9 |
| <i>circHDAC9</i> | miR-145-5p          | 3 |
| <i>circHDAC9</i> | miR-147a            | 1 |
| <i>circHDAC9</i> | miR-148a-5p         | 7 |
| <i>circHDAC9</i> | miR-148b-5p/6874-3p | 5 |
| <i>circHDAC9</i> | miR-1587/3620-5p    | 4 |
| <i>circHDAC9</i> | miR-18-5p           | 5 |
| <i>circHDAC9</i> | miR-185-5p          | 3 |
| <i>circHDAC9</i> | miR-187-3p          | 2 |
| <i>circHDAC9</i> | miR-18a-3p          | 5 |

|                  |                       |   |
|------------------|-----------------------|---|
| <i>circHDAC9</i> | miR-190-5p            | 2 |
| <i>circHDAC9</i> | miR-1911-3p           | 4 |
| <i>circHDAC9</i> | miR-1972              | 3 |
| <i>circHDAC9</i> | miR-1976              | 3 |
| <i>circHDAC9</i> | miR-199-3p            | 2 |
| <i>circHDAC9</i> | miR-208-5p            | 2 |
| <i>circHDAC9</i> | miR-210-5p            | 2 |
| <i>circHDAC9</i> | miR-211-3p            | 1 |
| <i>circHDAC9</i> | miR-2114-3p           | 4 |
| <i>circHDAC9</i> | miR-2115-3p           | 2 |
| <i>circHDAC9</i> | miR-2116-5p           | 6 |
| <i>circHDAC9</i> | miR-2117              | 4 |
| <i>circHDAC9</i> | miR-218-5p            | 1 |
| <i>circHDAC9</i> | miR-22-3p             | 4 |
| <i>circHDAC9</i> | miR-22-5p             | 6 |
| <i>circHDAC9</i> | miR-222-5p            | 3 |
| <i>circHDAC9</i> | miR-2276-3p           | 2 |
| <i>circHDAC9</i> | miR-23-3p             | 1 |
| <i>circHDAC9</i> | miR-24-3p             | 3 |
| <i>circHDAC9</i> | miR-26-5p             | 3 |
| <i>circHDAC9</i> | miR-2682-3p/6781-3p   | 6 |
| <i>circHDAC9</i> | miR-26b-3p            | 4 |
| <i>circHDAC9</i> | miR-27b-5p            | 3 |
| <i>circHDAC9</i> | miR-28-3p             | 1 |
| <i>circHDAC9</i> | miR-29a-5p            | 4 |
| <i>circHDAC9</i> | miR-301a-5p/301b-5p   | 3 |
| <i>circHDAC9</i> | miR-302f              | 3 |
| <i>circHDAC9</i> | miR-3064-3p           | 6 |
| <i>circHDAC9</i> | miR-3074-5p           | 9 |
| <i>circHDAC9</i> | miR-3121-5p           | 1 |
| <i>circHDAC9</i> | miR-3122/3913-5p      | 2 |
| <i>circHDAC9</i> | miR-3125/3916/6859-5p | 3 |
| <i>circHDAC9</i> | miR-3127-3p/6756-3p   | 1 |
| <i>circHDAC9</i> | miR-3134              | 2 |
| <i>circHDAC9</i> | miR-3135b             | 3 |
| <i>circHDAC9</i> | miR-3136-3p/7155-3p   | 4 |
| <i>circHDAC9</i> | miR-3140-5p           | 3 |
| <i>circHDAC9</i> | miR-3150b-3p          | 2 |

|                  |                           |    |
|------------------|---------------------------|----|
| <i>circHDAC9</i> | miR-3152-5p               | 5  |
| <i>circHDAC9</i> | miR-3153/6733-5p/6739-5p  | 2  |
| <i>circHDAC9</i> | miR-3157-3p               | 2  |
| <i>circHDAC9</i> | miR-3165                  | 1  |
| <i>circHDAC9</i> | miR-3168                  | 5  |
| <i>circHDAC9</i> | miR-3177-5p               | 2  |
| <i>circHDAC9</i> | miR-3179                  | 1  |
| <i>circHDAC9</i> | miR-3182                  | 11 |
| <i>circHDAC9</i> | miR-3183/4723-3p/6769b-3p | 3  |
| <i>circHDAC9</i> | miR-3191-5p               | 3  |
| <i>circHDAC9</i> | miR-3193                  | 3  |
| <i>circHDAC9</i> | miR-3198/4309             | 2  |
| <i>circHDAC9</i> | miR-320e                  | 6  |
| <i>circHDAC9</i> | miR-324-3p/1913           | 5  |
| <i>circHDAC9</i> | miR-331-3p                | 2  |
| <i>circHDAC9</i> | miR-339-5p                | 2  |
| <i>circHDAC9</i> | miR-342-5p/4664-5p        | 1  |
| <i>circHDAC9</i> | miR-345-3p                | 3  |
| <i>circHDAC9</i> | miR-3529-3p               | 3  |
| <i>circHDAC9</i> | miR-361-5p                | 2  |
| <i>circHDAC9</i> | miR-362-5p/500b-5p        | 2  |
| <i>circHDAC9</i> | miR-363-5p/6745           | 3  |
| <i>circHDAC9</i> | miR-3653-3p               | 2  |
| <i>circHDAC9</i> | miR-3653-5p               | 3  |
| <i>circHDAC9</i> | miR-3659                  | 2  |
| <i>circHDAC9</i> | miR-3664-5p               | 2  |
| <i>circHDAC9</i> | miR-367-5p                | 7  |
| <i>circHDAC9</i> | miR-3674                  | 1  |
| <i>circHDAC9</i> | miR-3680-3p               | 1  |
| <i>circHDAC9</i> | miR-3682-5p               | 5  |
| <i>circHDAC9</i> | miR-3686                  | 3  |
| <i>circHDAC9</i> | miR-3692-3p               | 1  |
| <i>circHDAC9</i> | miR-3692-5p               | 14 |
| <i>circHDAC9</i> | miR-370-3p                | 3  |
| <i>circHDAC9</i> | miR-375                   | 5  |
| <i>circHDAC9</i> | miR-376b-5p/376c-5p       | 2  |
| <i>circHDAC9</i> | miR-378a-5p               | 4  |
| <i>circHDAC9</i> | miR-378j/6839-5p          | 5  |

|                  |                           |    |
|------------------|---------------------------|----|
| <i>circHDAC9</i> | miR-3907                  | 2  |
| <i>circHDAC9</i> | miR-3909                  | 2  |
| <i>circHDAC9</i> | miR-3911                  | 1  |
| <i>circHDAC9</i> | miR-3914                  | 6  |
| <i>circHDAC9</i> | miR-3920                  | 2  |
| <i>circHDAC9</i> | miR-3921/4653-5p          | 3  |
| <i>circHDAC9</i> | miR-3925-3p               | 5  |
| <i>circHDAC9</i> | miR-3928-3p               | 3  |
| <i>circHDAC9</i> | miR-3928-5p/6806-3p       | 10 |
| <i>circHDAC9</i> | miR-3936                  | 3  |
| <i>circHDAC9</i> | miR-3945                  | 2  |
| <i>circHDAC9</i> | miR-3973                  | 1  |
| <i>circHDAC9</i> | miR-3977                  | 9  |
| <i>circHDAC9</i> | miR-412-3p/6754-3p        | 3  |
| <i>circHDAC9</i> | miR-4251                  | 2  |
| <i>circHDAC9</i> | miR-4252                  | 6  |
| <i>circHDAC9</i> | miR-4253/6862-5p          | 2  |
| <i>circHDAC9</i> | miR-4256                  | 2  |
| <i>circHDAC9</i> | miR-4259                  | 4  |
| <i>circHDAC9</i> | miR-4264                  | 2  |
| <i>circHDAC9</i> | miR-4266                  | 2  |
| <i>circHDAC9</i> | miR-4268                  | 6  |
| <i>circHDAC9</i> | miR-4271/4725-3p/6780b-5p | 2  |
| <i>circHDAC9</i> | miR-4273/7156-5p          | 5  |
| <i>circHDAC9</i> | miR-4284                  | 3  |
| <i>circHDAC9</i> | miR-4293                  | 5  |
| <i>circHDAC9</i> | miR-4299                  | 4  |
| <i>circHDAC9</i> | miR-4303                  | 4  |
| <i>circHDAC9</i> | miR-4324                  | 3  |
| <i>circHDAC9</i> | miR-4326                  | 5  |
| <i>circHDAC9</i> | miR-4328                  | 4  |
| <i>circHDAC9</i> | miR-4329                  | 2  |
| <i>circHDAC9</i> | miR-4417                  | 1  |
| <i>circHDAC9</i> | miR-4433b-3p              | 2  |
| <i>circHDAC9</i> | miR-4436b-5p              | 3  |
| <i>circHDAC9</i> | miR-4437                  | 4  |
| <i>circHDAC9</i> | miR-4448                  | 6  |
| <i>circHDAC9</i> | miR-4453/4538             | 2  |

|                  |                    |   |
|------------------|--------------------|---|
| <i>circHDAC9</i> | miR-4456           | 4 |
| <i>circHDAC9</i> | miR-4467           | 2 |
| <i>circHDAC9</i> | miR-4476/6876-5p   | 2 |
| <i>circHDAC9</i> | miR-4490           | 2 |
| <i>circHDAC9</i> | miR-4509           | 3 |
| <i>circHDAC9</i> | miR-450a-1-3p      | 2 |
| <i>circHDAC9</i> | miR-450b-3p/769-3p | 3 |
| <i>circHDAC9</i> | miR-450b-5p        | 1 |
| <i>circHDAC9</i> | miR-4521           | 1 |
| <i>circHDAC9</i> | miR-4527/6503-5p   | 3 |
| <i>circHDAC9</i> | miR-4531           | 3 |
| <i>circHDAC9</i> | miR-4534/8082      | 2 |
| <i>circHDAC9</i> | miR-4635           | 3 |
| <i>circHDAC9</i> | miR-4645-5p/4673   | 4 |
| <i>circHDAC9</i> | miR-4649-3p        | 5 |
| <i>circHDAC9</i> | miR-4650-5p        | 3 |
| <i>circHDAC9</i> | miR-4652-3p        | 4 |
| <i>circHDAC9</i> | miR-4653-3p        | 2 |
| <i>circHDAC9</i> | miR-466            | 1 |
| <i>circHDAC9</i> | miR-4663           | 3 |
| <i>circHDAC9</i> | miR-4668-5p        | 2 |
| <i>circHDAC9</i> | miR-4670-3p        | 4 |
| <i>circHDAC9</i> | miR-4674           | 4 |
| <i>circHDAC9</i> | miR-4677-5p        | 5 |
| <i>circHDAC9</i> | miR-4680-5p        | 3 |
| <i>circHDAC9</i> | miR-4683           | 1 |
| <i>circHDAC9</i> | miR-4684-3p        | 4 |
| <i>circHDAC9</i> | miR-4684-5p        | 2 |
| <i>circHDAC9</i> | miR-4695-5p        | 2 |
| <i>circHDAC9</i> | miR-4699-3p        | 2 |
| <i>circHDAC9</i> | miR-4700-3p        | 3 |
| <i>circHDAC9</i> | miR-4703-3p        | 2 |
| <i>circHDAC9</i> | miR-4708-3p        | 1 |
| <i>circHDAC9</i> | miR-4708-5p        | 4 |
| <i>circHDAC9</i> | miR-4709-5p        | 6 |
| <i>circHDAC9</i> | miR-4710           | 3 |
| <i>circHDAC9</i> | miR-4711-3p        | 2 |
| <i>circHDAC9</i> | miR-4711-5p        | 2 |

|                  |                                  |   |
|------------------|----------------------------------|---|
| <i>circHDAC9</i> | miR-4714-5p                      | 2 |
| <i>circHDAC9</i> | miR-4715-3p                      | 6 |
| <i>circHDAC9</i> | miR-4715-5p                      | 4 |
| <i>circHDAC9</i> | miR-4716-3p/6794-5p              | 3 |
| <i>circHDAC9</i> | miR-4723-5p/5698/6870-5p/7111-5p | 1 |
| <i>circHDAC9</i> | miR-4728-3p                      | 4 |
| <i>circHDAC9</i> | miR-4730                         | 2 |
| <i>circHDAC9</i> | miR-4733-5p                      | 1 |
| <i>circHDAC9</i> | miR-4738-3p                      | 2 |
| <i>circHDAC9</i> | miR-4743-3p                      | 4 |
| <i>circHDAC9</i> | miR-4744                         | 3 |
| <i>circHDAC9</i> | miR-4747-3p                      | 3 |
| <i>circHDAC9</i> | miR-4749-3p                      | 2 |
| <i>circHDAC9</i> | miR-4761-5p                      | 3 |
| <i>circHDAC9</i> | miR-4762-3p                      | 4 |
| <i>circHDAC9</i> | miR-4766-5p                      | 2 |
| <i>circHDAC9</i> | miR-4768-5p/6833-3p              | 3 |
| <i>circHDAC9</i> | miR-4772-3p                      | 2 |
| <i>circHDAC9</i> | miR-4774-3p                      | 5 |
| <i>circHDAC9</i> | miR-4774-5p                      | 2 |
| <i>circHDAC9</i> | miR-4776-3p                      | 6 |
| <i>circHDAC9</i> | miR-4779                         | 2 |
| <i>circHDAC9</i> | miR-4780                         | 1 |
| <i>circHDAC9</i> | miR-4782-5p/5706                 | 2 |
| <i>circHDAC9</i> | miR-4792                         | 3 |
| <i>circHDAC9</i> | miR-4793-5p                      | 4 |
| <i>circHDAC9</i> | miR-4797-3p                      | 2 |
| <i>circHDAC9</i> | miR-4799-5p                      | 3 |
| <i>circHDAC9</i> | miR-4802-5p                      | 2 |
| <i>circHDAC9</i> | miR-486-5p                       | 1 |
| <i>circHDAC9</i> | miR-501-5p                       | 2 |
| <i>circHDAC9</i> | miR-5010-5p                      | 1 |
| <i>circHDAC9</i> | miR-502-5p                       | 2 |
| <i>circHDAC9</i> | miR-505-5p                       | 2 |
| <i>circHDAC9</i> | miR-507/557                      | 1 |
| <i>circHDAC9</i> | miR-5089-5p                      | 3 |
| <i>circHDAC9</i> | miR-5093                         | 1 |
| <i>circHDAC9</i> | miR-511-3p                       | 2 |

|                  |                    |    |
|------------------|--------------------|----|
| <i>circHDAC9</i> | miR-511-5p         | 3  |
| <i>circHDAC9</i> | miR-512-5p         | 2  |
| <i>circHDAC9</i> | miR-514a-5p        | 2  |
| <i>circHDAC9</i> | miR-516b-5p        | 2  |
| <i>circHDAC9</i> | miR-5187-5p        | 4  |
| <i>circHDAC9</i> | miR-518a-5p/527    | 1  |
| <i>circHDAC9</i> | miR-5192           | 3  |
| <i>circHDAC9</i> | miR-5196-3p        | 4  |
| <i>circHDAC9</i> | miR-520g-3p        | 1  |
| <i>circHDAC9</i> | miR-526b-5p        | 3  |
| <i>circHDAC9</i> | miR-532-5p         | 2  |
| <i>circHDAC9</i> | miR-544a           | 6  |
| <i>circHDAC9</i> | miR-544b           | 3  |
| <i>circHDAC9</i> | miR-548ao-5p/548ax | 2  |
| <i>circHDAC9</i> | miR-548at-5p       | 2  |
| <i>circHDAC9</i> | miR-548aw          | 1  |
| <i>circHDAC9</i> | miR-548m           | 3  |
| <i>circHDAC9</i> | miR-548q           | 4  |
| <i>circHDAC9</i> | miR-549a           | 3  |
| <i>circHDAC9</i> | miR-551b-5p        | 1  |
| <i>circHDAC9</i> | miR-5584-3p        | 5  |
| <i>circHDAC9</i> | miR-5585-5p        | 2  |
| <i>circHDAC9</i> | miR-561-3p         | 2  |
| <i>circHDAC9</i> | miR-574-5p         | 2  |
| <i>circHDAC9</i> | miR-576-3p         | 1  |
| <i>circHDAC9</i> | miR-578            | 6  |
| <i>circHDAC9</i> | miR-580-5p         | 3  |
| <i>circHDAC9</i> | miR-581            | 1  |
| <i>circHDAC9</i> | miR-584-3p         | 1  |
| <i>circHDAC9</i> | miR-587            | 4  |
| <i>circHDAC9</i> | miR-596            | 5  |
| <i>circHDAC9</i> | miR-597-5p         | 3  |
| <i>circHDAC9</i> | miR-601            | 2  |
| <i>circHDAC9</i> | miR-6068           | 2  |
| <i>circHDAC9</i> | miR-6069           | 4  |
| <i>circHDAC9</i> | miR-6071           | 12 |
| <i>circHDAC9</i> | miR-608/4651       | 1  |
| <i>circHDAC9</i> | miR-617            | 1  |



|                  |                       |   |
|------------------|-----------------------|---|
| <i>circHDAC9</i> | miR-618               | 4 |
| <i>circHDAC9</i> | miR-625-5p            | 1 |
| <i>circHDAC9</i> | miR-627-3p            | 3 |
| <i>circHDAC9</i> | miR-628-5p            | 2 |
| <i>circHDAC9</i> | miR-635/6774-5p       | 2 |
| <i>circHDAC9</i> | miR-640               | 1 |
| <i>circHDAC9</i> | miR-643               | 1 |
| <i>circHDAC9</i> | miR-644a              | 1 |
| <i>circHDAC9</i> | miR-6501-3p           | 3 |
| <i>circHDAC9</i> | miR-6505-3p           | 1 |
| <i>circHDAC9</i> | miR-6508-5p/8067      | 4 |
| <i>circHDAC9</i> | miR-6509-3p           | 3 |
| <i>circHDAC9</i> | miR-6509-5p           | 2 |
| <i>circHDAC9</i> | miR-6513-5p           | 2 |
| <i>circHDAC9</i> | miR-6514-5p           | 2 |
| <i>circHDAC9</i> | miR-652-3p            | 2 |
| <i>circHDAC9</i> | miR-653-5p            | 3 |
| <i>circHDAC9</i> | miR-654-5p            | 1 |
| <i>circHDAC9</i> | miR-661               | 6 |
| <i>circHDAC9</i> | miR-671-5p            | 3 |
| <i>circHDAC9</i> | miR-6721-5p           | 1 |
| <i>circHDAC9</i> | miR-6728-3p           | 8 |
| <i>circHDAC9</i> | miR-6728-5p           | 3 |
| <i>circHDAC9</i> | miR-6729-3p           | 1 |
| <i>circHDAC9</i> | miR-6732-5p           | 3 |
| <i>circHDAC9</i> | miR-6738-3p           | 6 |
| <i>circHDAC9</i> | miR-6741-3p           | 2 |
| <i>circHDAC9</i> | miR-6747-5p           | 1 |
| <i>circHDAC9</i> | miR-6753-3p/7107-3p   | 3 |
| <i>circHDAC9</i> | miR-6756-5p/6766-5p   | 3 |
| <i>circHDAC9</i> | miR-676-3p            | 2 |
| <i>circHDAC9</i> | miR-6761-5p           | 2 |
| <i>circHDAC9</i> | miR-6769a-5p/6769b-5p | 1 |
| <i>circHDAC9</i> | miR-6770-3p           | 2 |
| <i>circHDAC9</i> | miR-6772-3p           | 8 |
| <i>circHDAC9</i> | miR-6774-3p           | 2 |
| <i>circHDAC9</i> | miR-6780a-3p          | 4 |
| <i>circHDAC9</i> | miR-6780b-3p          | 1 |

|                  |                     |    |
|------------------|---------------------|----|
| <i>circHDAC9</i> | miR-6782-5p         | 3  |
| <i>circHDAC9</i> | miR-6801-3p/6810-3p | 2  |
| <i>circHDAC9</i> | miR-6805-5p         | 3  |
| <i>circHDAC9</i> | miR-6807-5p         | 3  |
| <i>circHDAC9</i> | miR-6809-3p         | 3  |
| <i>circHDAC9</i> | miR-6817-3p         | 4  |
| <i>circHDAC9</i> | miR-6818-5p         | 1  |
| <i>circHDAC9</i> | miR-6823-5p         | 2  |
| <i>circHDAC9</i> | miR-6828-3p         | 12 |
| <i>circHDAC9</i> | miR-6828-5p         | 3  |
| <i>circHDAC9</i> | miR-6830-3p         | 2  |
| <i>circHDAC9</i> | miR-6832-3p         | 2  |
| <i>circHDAC9</i> | miR-6836-3p         | 7  |
| <i>circHDAC9</i> | miR-6837-3p         | 3  |
| <i>circHDAC9</i> | miR-6844            | 3  |
| <i>circHDAC9</i> | miR-6880-5p         | 1  |
| <i>circHDAC9</i> | miR-6881-3p         | 4  |
| <i>circHDAC9</i> | miR-6882-3p         | 3  |
| <i>circHDAC9</i> | miR-6886-3p         | 2  |
| <i>circHDAC9</i> | miR-6888-3p         | 3  |
| <i>circHDAC9</i> | miR-6890-3p         | 6  |
| <i>circHDAC9</i> | miR-6892-5p         | 3  |
| <i>circHDAC9</i> | miR-6894-5p         | 2  |
| <i>circHDAC9</i> | miR-7110-3p         | 4  |
| <i>circHDAC9</i> | miR-7111-3p         | 4  |
| <i>circHDAC9</i> | miR-7112-3p         | 2  |
| <i>circHDAC9</i> | miR-7112-5p         | 2  |
| <i>circHDAC9</i> | miR-7152-5p         | 9  |
| <i>circHDAC9</i> | miR-7154-3p         | 2  |
| <i>circHDAC9</i> | miR-7160-5p         | 3  |
| <i>circHDAC9</i> | miR-7162-3p         | 5  |
| <i>circHDAC9</i> | miR-744-3p          | 12 |
| <i>circHDAC9</i> | miR-7515            | 1  |
| <i>circHDAC9</i> | miR-764             | 2  |
| <i>circHDAC9</i> | miR-765             | 2  |
| <i>circHDAC9</i> | miR-766-3p          | 5  |
| <i>circHDAC9</i> | miR-766-5p          | 2  |
| <i>circHDAC9</i> | miR-767-3p          | 5  |

|                  |                |    |
|------------------|----------------|----|
| <i>circHDAC9</i> | miR-7843-3p    | 5  |
| <i>circHDAC9</i> | miR-7847-3p    | 1  |
| <i>circHDAC9</i> | miR-7977       | 1  |
| <i>circHDAC9</i> | miR-7978       | 4  |
| <i>circHDAC9</i> | miR-8065       | 3  |
| <i>circHDAC9</i> | miR-8066       | 1  |
| <i>circHDAC9</i> | miR-8071       | 1  |
| <i>circHDAC9</i> | miR-8074       | 3  |
| <i>circHDAC9</i> | miR-8075       | 2  |
| <i>circHDAC9</i> | miR-8077       | 3  |
| <i>circHDAC9</i> | miR-873-5p.1   | 3  |
| <i>circHDAC9</i> | miR-874-3p     | 2  |
| <i>circHDAC9</i> | miR-875-3p     | 1  |
| <i>circHDAC9</i> | miR-876-5p     | 2  |
| <i>circHDAC9</i> | miR-877-3p     | 2  |
| <i>circHDAC9</i> | miR-885-3p     | 1  |
| <i>circHDAC9</i> | miR-885-5p     | 2  |
| <i>circHDAC9</i> | miR-887-5p     | 2  |
| <i>circHDAC9</i> | miR-889-5p     | 3  |
| <i>circHDAC9</i> | miR-891b       | 1  |
| <i>circHDAC9</i> | miR-92a-2-5p   | 1  |
| <i>circHDAC9</i> | miR-93-3p      | 14 |
| <i>circHDAC9</i> | miR-935        | 3  |
| <i>circHDAC9</i> | miR-936        | 2  |
| <i>circHDAC9</i> | miR-938        | 2  |
| <i>circHDAC9</i> | miR-942-5p     | 3  |
| <i>circHDAC9</i> | let-7-5p/98-5p | 1  |
| <i>circHDAC9</i> | miR-1-5p       | 1  |
| <i>circHDAC9</i> | miR-10a-3p     | 1  |
| <i>circHDAC9</i> | miR-1179       | 1  |
| <i>circHDAC9</i> | miR-1184       | 1  |
| <i>circHDAC9</i> | miR-1185-5p    | 3  |
| <i>circHDAC9</i> | miR-1202/3972  | 2  |
| <i>circHDAC9</i> | miR-1205       | 1  |
| <i>circHDAC9</i> | miR-1206       | 2  |
| <i>circHDAC9</i> | miR-1207-3p    | 1  |
| <i>circHDAC9</i> | miR-1208       | 2  |
| <i>circHDAC9</i> | miR-1224-5p    | 2  |

|                  |                          |   |
|------------------|--------------------------|---|
| <i>circHDAC9</i> | miR-1225-5p              | 2 |
| <i>circHDAC9</i> | miR-1226-3p              | 1 |
| <i>circHDAC9</i> | miR-1226-5p              | 2 |
| <i>circHDAC9</i> | miR-1229-5p              | 2 |
| <i>circHDAC9</i> | miR-1236-3p              | 1 |
| <i>circHDAC9</i> | miR-1236-5p              | 3 |
| <i>circHDAC9</i> | miR-1237-5p/4488/4697-5p | 2 |
| <i>circHDAC9</i> | miR-1238-3p              | 3 |
| <i>circHDAC9</i> | miR-1238-5p/4758-5p      | 1 |
| <i>circHDAC9</i> | miR-1247-3p              | 1 |
| <i>circHDAC9</i> | miR-125-5p               | 1 |
| <i>circHDAC9</i> | miR-1250-3p              | 2 |
| <i>circHDAC9</i> | miR-1252-5p              | 2 |
| <i>circHDAC9</i> | miR-1257                 | 1 |
| <i>circHDAC9</i> | miR-125a-3p              | 1 |
| <i>circHDAC9</i> | miR-1262/4701-3p/6736-5p | 1 |
| <i>circHDAC9</i> | miR-1264                 | 1 |
| <i>circHDAC9</i> | miR-1273h-3p             | 1 |
| <i>circHDAC9</i> | miR-1283                 | 1 |
| <i>circHDAC9</i> | miR-1286                 | 1 |
| <i>circHDAC9</i> | miR-1292-5p              | 1 |
| <i>circHDAC9</i> | miR-1302/4298            | 1 |
| <i>circHDAC9</i> | miR-1305                 | 1 |
| <i>circHDAC9</i> | miR-1307-3p              | 1 |
| <i>circHDAC9</i> | miR-130b-5p              | 1 |
| <i>circHDAC9</i> | miR-1323                 | 1 |
| <i>circHDAC9</i> | miR-133a-3p.1            | 1 |
| <i>circHDAC9</i> | miR-133a-5p              | 2 |
| <i>circHDAC9</i> | miR-134-3p               | 1 |
| <i>circHDAC9</i> | miR-134-5p               | 1 |
| <i>circHDAC9</i> | miR-136-5p               | 1 |
| <i>circHDAC9</i> | miR-137                  | 1 |
| <i>circHDAC9</i> | miR-138-5p               | 2 |
| <i>circHDAC9</i> | miR-141-3p/200-3p        | 1 |
| <i>circHDAC9</i> | miR-141-5p               | 2 |
| <i>circHDAC9</i> | miR-146-5p               | 1 |
| <i>circHDAC9</i> | miR-1468-3p              | 1 |
| <i>circHDAC9</i> | miR-146a-3p              | 2 |

|                  |                                      |   |
|------------------|--------------------------------------|---|
| <i>circHDAC9</i> | miR-15-5p/16-5p/195-5p/424-5p/497-5p | 1 |
| <i>circHDAC9</i> | miR-153-3p                           | 1 |
| <i>circHDAC9</i> | miR-153-5p                           | 3 |
| <i>circHDAC9</i> | miR-1537-3p                          | 1 |
| <i>circHDAC9</i> | miR-155-5p                           | 1 |
| <i>circHDAC9</i> | miR-17-3p                            | 1 |
| <i>circHDAC9</i> | miR-181-3p/4420                      | 4 |
| <i>circHDAC9</i> | miR-181-5p                           | 1 |
| <i>circHDAC9</i> | miR-182-3p                           | 1 |
| <i>circHDAC9</i> | miR-1825                             | 1 |
| <i>circHDAC9</i> | miR-1827                             | 1 |
| <i>circHDAC9</i> | miR-183-3p                           | 2 |
| <i>circHDAC9</i> | miR-183-5p.1                         | 1 |
| <i>circHDAC9</i> | miR-183-5p.2                         | 1 |
| <i>circHDAC9</i> | miR-185-3p                           | 3 |
| <i>circHDAC9</i> | miR-186-5p                           | 1 |
| <i>circHDAC9</i> | miR-188-5p                           | 1 |
| <i>circHDAC9</i> | miR-1910-3p/6511a-5p                 | 1 |
| <i>circHDAC9</i> | miR-1915-3p/6764-5p                  | 1 |
| <i>circHDAC9</i> | miR-1915-5p                          | 1 |
| <i>circHDAC9</i> | miR-192-3p                           | 1 |
| <i>circHDAC9</i> | miR-192-5p/215-5p                    | 1 |
| <i>circHDAC9</i> | miR-193a-5p                          | 1 |
| <i>circHDAC9</i> | miR-194-5p                           | 2 |
| <i>circHDAC9</i> | miR-197-5p/3132                      | 1 |
| <i>circHDAC9</i> | miR-199-5p                           | 1 |
| <i>circHDAC9</i> | miR-202-3p                           | 2 |
| <i>circHDAC9</i> | miR-203b-3p                          | 1 |
| <i>circHDAC9</i> | miR-204-3p/4646-5p                   | 2 |
| <i>circHDAC9</i> | miR-205-5p                           | 4 |
| <i>circHDAC9</i> | miR-20a-3p                           | 1 |
| <i>circHDAC9</i> | miR-21-3p/3591-3p                    | 1 |
| <i>circHDAC9</i> | miR-2113                             | 1 |
| <i>circHDAC9</i> | miR-2115-5p                          | 1 |
| <i>circHDAC9</i> | miR-215-3p                           | 1 |
| <i>circHDAC9</i> | miR-218-1-3p                         | 1 |
| <i>circHDAC9</i> | miR-218-2-3p                         | 1 |
| <i>circHDAC9</i> | miR-219a-2-3p                        | 1 |

|                  |                      |   |
|------------------|----------------------|---|
| <i>circHDAC9</i> | miR-219b-3p          | 1 |
| <i>circHDAC9</i> | miR-221-3p/222-3p    | 1 |
| <i>circHDAC9</i> | miR-2276-5p          | 1 |
| <i>circHDAC9</i> | miR-23-5p            | 1 |
| <i>circHDAC9</i> | miR-2355-3p          | 1 |
| <i>circHDAC9</i> | miR-2355-5p          | 1 |
| <i>circHDAC9</i> | miR-24-5p            | 1 |
| <i>circHDAC9</i> | miR-2467-3p          | 2 |
| <i>circHDAC9</i> | miR-2467-5p          | 1 |
| <i>circHDAC9</i> | miR-27-3p            | 1 |
| <i>circHDAC9</i> | miR-299-3p           | 1 |
| <i>circHDAC9</i> | miR-30-3p            | 1 |
| <i>circHDAC9</i> | miR-302c-3p.2/520-3p | 1 |
| <i>circHDAC9</i> | miR-3119             | 1 |
| <i>circHDAC9</i> | miR-3120-5p          | 1 |
| <i>circHDAC9</i> | miR-3124-3p          | 1 |
| <i>circHDAC9</i> | miR-3127-5p          | 1 |
| <i>circHDAC9</i> | miR-3133             | 1 |
| <i>circHDAC9</i> | miR-3136-5p/4439     | 3 |
| <i>circHDAC9</i> | miR-3140-3p          | 2 |
| <i>circHDAC9</i> | miR-3141             | 1 |
| <i>circHDAC9</i> | miR-3143             | 1 |
| <i>circHDAC9</i> | miR-3145-5p          | 1 |
| <i>circHDAC9</i> | miR-3147             | 3 |
| <i>circHDAC9</i> | miR-3154             | 1 |
| <i>circHDAC9</i> | miR-3158-5p          | 1 |
| <i>circHDAC9</i> | miR-3159             | 1 |
| <i>circHDAC9</i> | miR-3160-3p          | 1 |
| <i>circHDAC9</i> | miR-3160-5p          | 1 |
| <i>circHDAC9</i> | miR-3163             | 3 |
| <i>circHDAC9</i> | miR-3164             | 1 |
| <i>circHDAC9</i> | miR-3166             | 1 |
| <i>circHDAC9</i> | miR-3171             | 1 |
| <i>circHDAC9</i> | miR-3173-3p/6891-5p  | 1 |
| <i>circHDAC9</i> | miR-3178             | 1 |
| <i>circHDAC9</i> | miR-3180-5p          | 1 |
| <i>circHDAC9</i> | miR-3184-3p          | 1 |
| <i>circHDAC9</i> | miR-3188             | 1 |

|                  |                           |   |
|------------------|---------------------------|---|
| <i>circHDAC9</i> | miR-3189-5p               | 2 |
| <i>circHDAC9</i> | miR-3192-5p               | 2 |
| <i>circHDAC9</i> | miR-3194-3p               | 2 |
| <i>circHDAC9</i> | miR-32-3p                 | 1 |
| <i>circHDAC9</i> | miR-3200-3p               | 1 |
| <i>circHDAC9</i> | miR-3200-5p               | 1 |
| <i>circHDAC9</i> | miR-328-3p                | 1 |
| <i>circHDAC9</i> | miR-330-3p.2              | 3 |
| <i>circHDAC9</i> | miR-335-3p                | 1 |
| <i>circHDAC9</i> | miR-33a-3p                | 1 |
| <i>circHDAC9</i> | miR-340-5p                | 1 |
| <i>circHDAC9</i> | miR-342-3p                | 2 |
| <i>circHDAC9</i> | miR-346                   | 1 |
| <i>circHDAC9</i> | miR-34b-3p                | 1 |
| <i>circHDAC9</i> | miR-34b-5p/449c-5p        | 1 |
| <i>circHDAC9</i> | miR-34c-3p                | 1 |
| <i>circHDAC9</i> | miR-3605-5p               | 3 |
| <i>circHDAC9</i> | miR-3607-5p               | 1 |
| <i>circHDAC9</i> | miR-3611                  | 1 |
| <i>circHDAC9</i> | miR-3616-3p               | 1 |
| <i>circHDAC9</i> | miR-3619-3p               | 1 |
| <i>circHDAC9</i> | miR-3622b-5p              | 1 |
| <i>circHDAC9</i> | miR-3649                  | 1 |
| <i>circHDAC9</i> | miR-365-3p                | 1 |
| <i>circHDAC9</i> | miR-3652/4430             | 2 |
| <i>circHDAC9</i> | miR-3655                  | 1 |
| <i>circHDAC9</i> | miR-3663-5p               | 1 |
| <i>circHDAC9</i> | miR-3665                  | 1 |
| <i>circHDAC9</i> | miR-3667-3p               | 2 |
| <i>circHDAC9</i> | miR-3678-3p               | 1 |
| <i>circHDAC9</i> | miR-3688-3p               | 1 |
| <i>circHDAC9</i> | miR-369-3p                | 1 |
| <i>circHDAC9</i> | miR-3690                  | 3 |
| <i>circHDAC9</i> | miR-3691-5p               | 2 |
| <i>circHDAC9</i> | miR-371-5p                | 1 |
| <i>circHDAC9</i> | miR-371b-5p/373-5p/616-5p | 1 |
| <i>circHDAC9</i> | miR-372-5p                | 1 |
| <i>circHDAC9</i> | miR-374b-3p               | 1 |

|                  |                     |   |
|------------------|---------------------|---|
| <i>circHDAC9</i> | miR-374c-3p         | 1 |
| <i>circHDAC9</i> | miR-376a-2-5p       | 1 |
| <i>circHDAC9</i> | miR-376a-5p         | 1 |
| <i>circHDAC9</i> | miR-377-3p          | 1 |
| <i>circHDAC9</i> | miR-378-3p          | 1 |
| <i>circHDAC9</i> | miR-382-5p          | 1 |
| <i>circHDAC9</i> | miR-3912-5p         | 4 |
| <i>circHDAC9</i> | miR-3915            | 2 |
| <i>circHDAC9</i> | miR-3934-3p         | 1 |
| <i>circHDAC9</i> | miR-3934-5p         | 1 |
| <i>circHDAC9</i> | miR-3940-5p/4507    | 1 |
| <i>circHDAC9</i> | miR-3943            | 2 |
| <i>circHDAC9</i> | miR-3944-5p         | 2 |
| <i>circHDAC9</i> | miR-3975            | 1 |
| <i>circHDAC9</i> | miR-409-3p          | 1 |
| <i>circHDAC9</i> | miR-423-3p          | 1 |
| <i>circHDAC9</i> | miR-423-5p          | 1 |
| <i>circHDAC9</i> | miR-4254            | 3 |
| <i>circHDAC9</i> | miR-4257            | 2 |
| <i>circHDAC9</i> | miR-4265/4296/4322  | 1 |
| <i>circHDAC9</i> | miR-4267            | 4 |
| <i>circHDAC9</i> | miR-4269/6715b-5p   | 2 |
| <i>circHDAC9</i> | miR-4274            | 1 |
| <i>circHDAC9</i> | miR-4278            | 1 |
| <i>circHDAC9</i> | miR-4279            | 3 |
| <i>circHDAC9</i> | miR-4281            | 1 |
| <i>circHDAC9</i> | miR-4283            | 3 |
| <i>circHDAC9</i> | miR-4289            | 1 |
| <i>circHDAC9</i> | miR-4302            | 1 |
| <i>circHDAC9</i> | miR-4304            | 1 |
| <i>circHDAC9</i> | miR-4320            | 2 |
| <i>circHDAC9</i> | miR-4323            | 2 |
| <i>circHDAC9</i> | miR-433-3p          | 1 |
| <i>circHDAC9</i> | miR-4330            | 1 |
| <i>circHDAC9</i> | miR-4422            | 3 |
| <i>circHDAC9</i> | miR-4423-5p         | 2 |
| <i>circHDAC9</i> | miR-4425            | 3 |
| <i>circHDAC9</i> | miR-4426/4647/4662b | 1 |



|                  |                    |   |
|------------------|--------------------|---|
| <i>circHDAC9</i> | miR-4428           | 1 |
| <i>circHDAC9</i> | miR-4432           | 1 |
| <i>circHDAC9</i> | miR-4433a-3p       | 1 |
| <i>circHDAC9</i> | miR-4433a-5p       | 1 |
| <i>circHDAC9</i> | miR-4433b-5p       | 1 |
| <i>circHDAC9</i> | miR-4434/4516/5703 | 1 |
| <i>circHDAC9</i> | miR-4446-5p        | 1 |
| <i>circHDAC9</i> | miR-4452           | 2 |
| <i>circHDAC9</i> | miR-4457           | 2 |
| <i>circHDAC9</i> | miR-4459           | 1 |
| <i>circHDAC9</i> | miR-4461           | 1 |
| <i>circHDAC9</i> | miR-4463           | 2 |
| <i>circHDAC9</i> | miR-4470           | 3 |
| <i>circHDAC9</i> | miR-4471/8059      | 1 |
| <i>circHDAC9</i> | miR-4473           | 1 |
| <i>circHDAC9</i> | miR-4475           | 2 |
| <i>circHDAC9</i> | miR-448            | 1 |
| <i>circHDAC9</i> | miR-4480           | 1 |
| <i>circHDAC9</i> | miR-4485-5p        | 1 |
| <i>circHDAC9</i> | miR-4487           | 1 |
| <i>circHDAC9</i> | miR-4489           | 3 |
| <i>circHDAC9</i> | miR-4491/4657      | 1 |
| <i>circHDAC9</i> | miR-4494           | 1 |
| <i>circHDAC9</i> | miR-4495           | 1 |
| <i>circHDAC9</i> | miR-4499           | 2 |
| <i>circHDAC9</i> | miR-4504           | 1 |
| <i>circHDAC9</i> | miR-4505/5787      | 2 |
| <i>circHDAC9</i> | miR-4508           | 1 |
| <i>circHDAC9</i> | miR-4513/6855-3p   | 2 |
| <i>circHDAC9</i> | miR-4514/4692      | 2 |
| <i>circHDAC9</i> | miR-4519           | 1 |
| <i>circHDAC9</i> | miR-4520-5p        | 1 |
| <i>circHDAC9</i> | miR-4524-5p        | 1 |
| <i>circHDAC9</i> | miR-4535           | 1 |
| <i>circHDAC9</i> | miR-4638-3p        | 1 |
| <i>circHDAC9</i> | miR-4638-5p        | 1 |
| <i>circHDAC9</i> | miR-4641           | 1 |
| <i>circHDAC9</i> | miR-4646-3p        | 1 |

|                  |                     |   |
|------------------|---------------------|---|
| <i>circHDAC9</i> | miR-4656            | 1 |
| <i>circHDAC9</i> | miR-4658/6790-5p    | 1 |
| <i>circHDAC9</i> | miR-4671-3p         | 1 |
| <i>circHDAC9</i> | miR-4671-5p         | 1 |
| <i>circHDAC9</i> | miR-4675/4741       | 1 |
| <i>circHDAC9</i> | miR-4677-3p         | 2 |
| <i>circHDAC9</i> | miR-4678            | 1 |
| <i>circHDAC9</i> | miR-4679            | 2 |
| <i>circHDAC9</i> | miR-4682            | 1 |
| <i>circHDAC9</i> | miR-4686            | 2 |
| <i>circHDAC9</i> | miR-4688/6743-5p    | 1 |
| <i>circHDAC9</i> | miR-4689/6858-5p    | 2 |
| <i>circHDAC9</i> | miR-4690-3p/5685    | 1 |
| <i>circHDAC9</i> | miR-4690-5p         | 1 |
| <i>circHDAC9</i> | miR-4691-5p/6792-3p | 2 |
| <i>circHDAC9</i> | miR-4694-5p         | 1 |
| <i>circHDAC9</i> | miR-4699-5p         | 1 |
| <i>circHDAC9</i> | miR-4721            | 1 |
| <i>circHDAC9</i> | miR-4722-5p         | 1 |
| <i>circHDAC9</i> | miR-4726-3p         | 1 |
| <i>circHDAC9</i> | miR-4727-5p         | 1 |
| <i>circHDAC9</i> | miR-4731-3p/4801    | 1 |
| <i>circHDAC9</i> | miR-4731-5p         | 4 |
| <i>circHDAC9</i> | miR-4732-3p         | 1 |
| <i>circHDAC9</i> | miR-4733-3p         | 1 |
| <i>circHDAC9</i> | miR-4734            | 1 |
| <i>circHDAC9</i> | miR-4739            | 1 |
| <i>circHDAC9</i> | miR-4742-5p         | 2 |
| <i>circHDAC9</i> | miR-4747-5p/5196-5p | 2 |
| <i>circHDAC9</i> | miR-4752            | 2 |
| <i>circHDAC9</i> | miR-4753-3p         | 1 |
| <i>circHDAC9</i> | miR-4755-3p         | 5 |
| <i>circHDAC9</i> | miR-4755-5p/5006-3p | 3 |
| <i>circHDAC9</i> | miR-4758-3p         | 2 |
| <i>circHDAC9</i> | miR-4763-5p         | 2 |
| <i>circHDAC9</i> | miR-4764-5p         | 1 |
| <i>circHDAC9</i> | miR-4765            | 3 |
| <i>circHDAC9</i> | miR-4768-3p         | 1 |

|                  |                             |   |
|------------------|-----------------------------|---|
| <i>circHDAC9</i> | miR-4769-3p/6817-5p         | 2 |
| <i>circHDAC9</i> | miR-4771                    | 1 |
| <i>circHDAC9</i> | miR-4776-5p                 | 1 |
| <i>circHDAC9</i> | miR-4777-3p                 | 1 |
| <i>circHDAC9</i> | miR-4778-3p                 | 1 |
| <i>circHDAC9</i> | miR-4781-3p                 | 1 |
| <i>circHDAC9</i> | miR-4786-3p                 | 3 |
| <i>circHDAC9</i> | miR-4790-5p                 | 1 |
| <i>circHDAC9</i> | miR-4795-5p                 | 1 |
| <i>circHDAC9</i> | miR-485-5p                  | 1 |
| <i>circHDAC9</i> | miR-486-3p                  | 2 |
| <i>circHDAC9</i> | miR-488-5p                  | 1 |
| <i>circHDAC9</i> | miR-490-3p                  | 1 |
| <i>circHDAC9</i> | miR-490-5p                  | 1 |
| <i>circHDAC9</i> | miR-495-5p                  | 1 |
| <i>circHDAC9</i> | miR-498                     | 2 |
| <i>circHDAC9</i> | miR-499b-5p                 | 1 |
| <i>circHDAC9</i> | miR-5001-3p                 | 1 |
| <i>circHDAC9</i> | miR-5002-3p                 | 1 |
| <i>circHDAC9</i> | miR-5006-5p                 | 2 |
| <i>circHDAC9</i> | miR-5010-3p                 | 1 |
| <i>circHDAC9</i> | miR-503-5p                  | 1 |
| <i>circHDAC9</i> | miR-504-3p                  | 1 |
| <i>circHDAC9</i> | miR-506-5p                  | 1 |
| <i>circHDAC9</i> | miR-508-5p                  | 1 |
| <i>circHDAC9</i> | miR-5089-3p                 | 1 |
| <i>circHDAC9</i> | miR-5090/6775-5p            | 1 |
| <i>circHDAC9</i> | miR-5092                    | 1 |
| <i>circHDAC9</i> | miR-512-3p                  | 1 |
| <i>circHDAC9</i> | miR-513a-5p                 | 1 |
| <i>circHDAC9</i> | miR-515-5p/519e-5p          | 3 |
| <i>circHDAC9</i> | miR-516a-3p/516b-3p/7162-5p | 1 |
| <i>circHDAC9</i> | miR-5189-3p                 | 2 |
| <i>circHDAC9</i> | miR-5193                    | 2 |
| <i>circHDAC9</i> | miR-5194                    | 1 |
| <i>circHDAC9</i> | miR-519d-5p                 | 3 |
| <i>circHDAC9</i> | miR-520f-5p                 | 2 |
| <i>circHDAC9</i> | miR-520g-5p                 | 1 |

|                  |                                                                  |   |
|------------------|------------------------------------------------------------------|---|
| <i>circHDAC9</i> | miR-542-3p                                                       | 1 |
| <i>circHDAC9</i> | miR-543                                                          | 2 |
| <i>circHDAC9</i> | miR-545-5p                                                       | 1 |
| <i>circHDAC9</i> | miR-548ai/548ag/548ba/570-5p                                     | 3 |
| <i>circHDAC9</i> | miR-548aj-5p/548f-5p/548g-5p/548x-5p                             | 1 |
| <i>circHDAC9</i> | miR-548ap-3p/548aa/548t-3p                                       | 1 |
| <i>circHDAC9</i> | miR-548as-3p                                                     | 1 |
| <i>circHDAC9</i> | miR-548av-5p/548k/8054                                           | 1 |
| <i>circHDAC9</i> | miR-548ay-3p/548at-3p                                            | 1 |
| <i>circHDAC9</i> | miR-548ay-5p/548au-5p/548as-5p/548ar-5p/548aq-5p/548ap-5p/548am- |   |
| <i>circHDAC9</i> | miR-548e-5p                                                      | 1 |
| <i>circHDAC9</i> | miR-548l                                                         | 1 |
| <i>circHDAC9</i> | miR-548u/7161-5p                                                 | 1 |
| <i>circHDAC9</i> | miR-548v                                                         | 1 |
| <i>circHDAC9</i> | miR-552-5p                                                       | 1 |
| <i>circHDAC9</i> | miR-5571-3p                                                      | 1 |
| <i>circHDAC9</i> | miR-5571-5p                                                      | 1 |
| <i>circHDAC9</i> | miR-558                                                          | 1 |
| <i>circHDAC9</i> | miR-5584-5p                                                      | 2 |
| <i>circHDAC9</i> | miR-5589-5p                                                      | 4 |
| <i>circHDAC9</i> | miR-561-5p                                                       | 5 |
| <i>circHDAC9</i> | miR-5681b                                                        | 1 |
| <i>circHDAC9</i> | miR-5690                                                         | 1 |
| <i>circHDAC9</i> | miR-5691                                                         | 1 |
| <i>circHDAC9</i> | miR-5692bc                                                       | 1 |
| <i>circHDAC9</i> | miR-5695                                                         | 3 |
| <i>circHDAC9</i> | miR-5696                                                         | 3 |
| <i>circHDAC9</i> | miR-5699-5p                                                      | 2 |
| <i>circHDAC9</i> | miR-573/3616-5p                                                  | 1 |
| <i>circHDAC9</i> | miR-579-3p                                                       | 3 |
| <i>circHDAC9</i> | miR-589-5p                                                       | 1 |
| <i>circHDAC9</i> | miR-604                                                          | 2 |
| <i>circHDAC9</i> | miR-6070                                                         | 1 |
| <i>circHDAC9</i> | miR-6076/6797-3p                                                 | 1 |
| <i>circHDAC9</i> | miR-6077                                                         | 3 |
| <i>circHDAC9</i> | miR-6078                                                         | 2 |
| <i>circHDAC9</i> | miR-6079                                                         | 2 |
| <i>circHDAC9</i> | miR-6080                                                         | 1 |

|                  |                    |   |
|------------------|--------------------|---|
| <i>circHDAC9</i> | miR-6084           | 1 |
| <i>circHDAC9</i> | miR-6085/6813-5p   | 1 |
| <i>circHDAC9</i> | miR-6128           | 1 |
| <i>circHDAC9</i> | miR-6131           | 2 |
| <i>circHDAC9</i> | miR-615-5p         | 3 |
| <i>circHDAC9</i> | miR-6165           | 1 |
| <i>circHDAC9</i> | miR-619-3p         | 1 |
| <i>circHDAC9</i> | miR-619-5p/6506-5p | 2 |
| <i>circHDAC9</i> | miR-626/6876-3p    | 2 |
| <i>circHDAC9</i> | miR-629-3p         | 3 |
| <i>circHDAC9</i> | miR-634            | 2 |
| <i>circHDAC9</i> | miR-642a-5p        | 1 |
| <i>circHDAC9</i> | miR-646            | 1 |
| <i>circHDAC9</i> | miR-647            | 2 |
| <i>circHDAC9</i> | miR-648            | 1 |
| <i>circHDAC9</i> | miR-649            | 1 |
| <i>circHDAC9</i> | miR-6501-5p        | 2 |
| <i>circHDAC9</i> | miR-6505-5p        | 1 |
| <i>circHDAC9</i> | miR-6507-5p        | 1 |
| <i>circHDAC9</i> | miR-6510-5p        | 1 |
| <i>circHDAC9</i> | miR-6511-5p        | 1 |
| <i>circHDAC9</i> | miR-6512-5p        | 1 |
| <i>circHDAC9</i> | miR-6514-3p        | 1 |
| <i>circHDAC9</i> | miR-6515-3p        | 1 |
| <i>circHDAC9</i> | miR-6516-3p        | 1 |
| <i>circHDAC9</i> | miR-653-3p         | 4 |
| <i>circHDAC9</i> | miR-656-5p         | 1 |
| <i>circHDAC9</i> | miR-657            | 1 |
| <i>circHDAC9</i> | miR-660-3p         | 2 |
| <i>circHDAC9</i> | miR-670-3p         | 3 |
| <i>circHDAC9</i> | miR-670-5p         | 2 |
| <i>circHDAC9</i> | miR-6715b-3p       | 1 |
| <i>circHDAC9</i> | miR-6731-5p/8085   | 1 |
| <i>circHDAC9</i> | miR-6733-3p        | 1 |
| <i>circHDAC9</i> | miR-6734-3p        | 2 |
| <i>circHDAC9</i> | miR-6734-5p        | 2 |
| <i>circHDAC9</i> | miR-6739-3p        | 3 |
| <i>circHDAC9</i> | miR-6740-3p        | 1 |

|                  |                     |   |
|------------------|---------------------|---|
| <i>circHDAC9</i> | miR-6740-5p         | 1 |
| <i>circHDAC9</i> | miR-6741-5p         | 1 |
| <i>circHDAC9</i> | miR-6748-5p         | 1 |
| <i>circHDAC9</i> | miR-6749-3p         | 2 |
| <i>circHDAC9</i> | miR-6750-5p/6822-5p | 2 |
| <i>circHDAC9</i> | miR-6758-3p         | 5 |
| <i>circHDAC9</i> | miR-6759-3p         | 1 |
| <i>circHDAC9</i> | miR-6759-5p         | 1 |
| <i>circHDAC9</i> | miR-676-5p          | 3 |
| <i>circHDAC9</i> | miR-6760-3p         | 2 |
| <i>circHDAC9</i> | miR-6760-5p         | 1 |
| <i>circHDAC9</i> | miR-6762-3p         | 2 |
| <i>circHDAC9</i> | miR-6765-5p         | 2 |
| <i>circHDAC9</i> | miR-6769a-3p        | 2 |
| <i>circHDAC9</i> | miR-6773-3p         | 1 |
| <i>circHDAC9</i> | miR-6776-5p         | 2 |
| <i>circHDAC9</i> | miR-6778-3p         | 1 |
| <i>circHDAC9</i> | miR-6785-3p         | 1 |
| <i>circHDAC9</i> | miR-6789-5p         | 1 |
| <i>circHDAC9</i> | miR-6791-3p/6829-3p | 1 |
| <i>circHDAC9</i> | miR-6793-3p         | 2 |
| <i>circHDAC9</i> | miR-6793-5p         | 1 |
| <i>circHDAC9</i> | miR-6796-3p         | 1 |
| <i>circHDAC9</i> | miR-6796-5p         | 1 |
| <i>circHDAC9</i> | miR-6798-5p         | 4 |
| <i>circHDAC9</i> | miR-6800-3p         | 1 |
| <i>circHDAC9</i> | miR-6804-3p         | 1 |
| <i>circHDAC9</i> | miR-6804-5p         | 1 |
| <i>circHDAC9</i> | miR-6808-3p         | 1 |
| <i>circHDAC9</i> | miR-6812-3p         | 1 |
| <i>circHDAC9</i> | miR-6813-3p         | 1 |
| <i>circHDAC9</i> | miR-6814-5p         | 1 |
| <i>circHDAC9</i> | miR-6824-5p         | 1 |
| <i>circHDAC9</i> | miR-6826-5p         | 1 |
| <i>circHDAC9</i> | miR-6829-5p         | 1 |
| <i>circHDAC9</i> | miR-6833-5p         | 2 |
| <i>circHDAC9</i> | miR-6834-5p         | 2 |
| <i>circHDAC9</i> | miR-6839-3p         | 1 |

|                  |                           |   |
|------------------|---------------------------|---|
| <i>circHDAC9</i> | miR-6840-3p               | 1 |
| <i>circHDAC9</i> | miR-6841-3p               | 1 |
| <i>circHDAC9</i> | miR-6842-3p               | 2 |
| <i>circHDAC9</i> | miR-6846-5p/6848-5p       | 2 |
| <i>circHDAC9</i> | miR-6847-5p               | 2 |
| <i>circHDAC9</i> | miR-6853-3p               | 2 |
| <i>circHDAC9</i> | miR-6856-3p               | 5 |
| <i>circHDAC9</i> | miR-6857-3p               | 2 |
| <i>circHDAC9</i> | miR-6861-5p               | 2 |
| <i>circHDAC9</i> | miR-6866-5p               | 3 |
| <i>circHDAC9</i> | miR-6867-5p               | 1 |
| <i>circHDAC9</i> | miR-6868-3p               | 1 |
| <i>circHDAC9</i> | miR-6869-5p               | 1 |
| <i>circHDAC9</i> | miR-6873-3p               | 1 |
| <i>circHDAC9</i> | miR-6873-5p               | 1 |
| <i>circHDAC9</i> | miR-6878-5p               | 1 |
| <i>circHDAC9</i> | miR-6879-3p               | 1 |
| <i>circHDAC9</i> | miR-6881-5p               | 1 |
| <i>circHDAC9</i> | miR-6885-3p               | 2 |
| <i>circHDAC9</i> | miR-6888-5p               | 2 |
| <i>circHDAC9</i> | miR-6892-3p               | 1 |
| <i>circHDAC9</i> | miR-6894-3p               | 1 |
| <i>circHDAC9</i> | miR-7-5p                  | 3 |
| <i>circHDAC9</i> | miR-7106-3p               | 1 |
| <i>circHDAC9</i> | miR-7152-3p               | 1 |
| <i>circHDAC9</i> | miR-7154-5p               | 1 |
| <i>circHDAC9</i> | miR-7158-3p               | 1 |
| <i>circHDAC9</i> | miR-718                   | 1 |
| <i>circHDAC9</i> | miR-762/4492/4498/5001-5p | 1 |
| <i>circHDAC9</i> | miR-7704                  | 3 |
| <i>circHDAC9</i> | miR-7851-3p               | 1 |
| <i>circHDAC9</i> | miR-7855-5p               | 2 |
| <i>circHDAC9</i> | miR-7975                  | 1 |
| <i>circHDAC9</i> | miR-802                   | 1 |
| <i>circHDAC9</i> | miR-8055                  | 1 |
| <i>circHDAC9</i> | miR-8056                  | 2 |
| <i>circHDAC9</i> | miR-8060                  | 1 |
| <i>circHDAC9</i> | miR-8068                  | 1 |

|                  |                         |   |
|------------------|-------------------------|---|
| <i>circHDAC9</i> | miR-8081                | 1 |
| <i>circHDAC9</i> | miR-8087                | 1 |
| <i>circHDAC9</i> | miR-873-3p              | 1 |
| <i>circHDAC9</i> | miR-873-5p.2            | 1 |
| <i>circHDAC9</i> | miR-875-5p              | 1 |
| <i>circHDAC9</i> | miR-877-5p              | 3 |
| <i>circHDAC9</i> | miR-888-3p              | 1 |
| <i>circHDAC9</i> | miR-892-5p              | 1 |
| <i>circHDAC9</i> | miR-892b                | 1 |
| <i>circHDAC9</i> | miR-940/6808-5p/6893-5p | 1 |
| <i>circHDAC9</i> | miR-943                 | 3 |
| <i>circHDAC9</i> | miR-95-5p               | 1 |
| <i>circHDAC9</i> | miR-9500                | 2 |
| <i>circHDAC9</i> | miR-99-3p               | 1 |
| <i>circHDAC9</i> | let-7a-2-3p/let-7g-3p   | 3 |
| <i>circHDAC9</i> | let-7c-3p               | 3 |
| <i>circHDAC9</i> | miR-100-3p              | 1 |
| <i>circHDAC9</i> | miR-103-3p/107          | 3 |
| <i>circHDAC9</i> | miR-103b                | 2 |
| <i>circHDAC9</i> | miR-105-5p              | 2 |
| <i>circHDAC9</i> | miR-1207-5p/4763-3p     | 2 |
| <i>circHDAC9</i> | miR-1227-3p             | 1 |
| <i>circHDAC9</i> | miR-1227-5p             | 3 |
| <i>circHDAC9</i> | miR-1237-3p             | 2 |
| <i>circHDAC9</i> | miR-1245a/8079          | 1 |
| <i>circHDAC9</i> | miR-1245b-5p            | 3 |
| <i>circHDAC9</i> | miR-1248                | 2 |
| <i>circHDAC9</i> | miR-1253                | 2 |
| <i>circHDAC9</i> | miR-1255a/1255b-5p      | 1 |
| <i>circHDAC9</i> | miR-126-3p.2            | 2 |
| <i>circHDAC9</i> | miR-1263                | 1 |
| <i>circHDAC9</i> | miR-1273d               | 2 |
| <i>circHDAC9</i> | miR-1273e               | 1 |
| <i>circHDAC9</i> | miR-1276                | 1 |
| <i>circHDAC9</i> | miR-1277-5p             | 1 |
| <i>circHDAC9</i> | miR-128-1-5p            | 2 |
| <i>circHDAC9</i> | miR-1285-5p             | 1 |
| <i>circHDAC9</i> | miR-1288-5p             | 2 |



|                  |                                     |   |
|------------------|-------------------------------------|---|
| <i>circHDAC9</i> | miR-1291/6775-3p                    | 1 |
| <i>circHDAC9</i> | miR-1294                            | 1 |
| <i>circHDAC9</i> | miR-1296-3p                         | 1 |
| <i>circHDAC9</i> | miR-1298-5p                         | 3 |
| <i>circHDAC9</i> | miR-1301-3p                         | 2 |
| <i>circHDAC9</i> | miR-1301-5p/6502-5p                 | 1 |
| <i>circHDAC9</i> | miR-1303                            | 1 |
| <i>circHDAC9</i> | miR-1306-5p                         | 3 |
| <i>circHDAC9</i> | miR-132-3p/212-3p                   | 3 |
| <i>circHDAC9</i> | miR-132-5p                          | 1 |
| <i>circHDAC9</i> | miR-133a-3p.2/133b                  | 1 |
| <i>circHDAC9</i> | miR-140-3p.2                        | 1 |
| <i>circHDAC9</i> | miR-142-5p                          | 1 |
| <i>circHDAC9</i> | miR-149-3p/4728-5p/6785-5p/6883-5p  | 2 |
| <i>circHDAC9</i> | miR-149-5p                          | 2 |
| <i>circHDAC9</i> | miR-150-3p                          | 1 |
| <i>circHDAC9</i> | miR-150-5p                          | 2 |
| <i>circHDAC9</i> | miR-1537-5p                         | 1 |
| <i>circHDAC9</i> | miR-154-3p/487-3p                   | 2 |
| <i>circHDAC9</i> | miR-16-2-3p/195-3p                  | 3 |
| <i>circHDAC9</i> | miR-17-5p/20-5p/93-5p/106-5p/519-3p | 1 |
| <i>circHDAC9</i> | miR-182-5p                          | 1 |
| <i>circHDAC9</i> | miR-1909-3p/6722-3p                 | 2 |
| <i>circHDAC9</i> | miR-1910-5p                         | 2 |
| <i>circHDAC9</i> | miR-1911-5p                         | 2 |
| <i>circHDAC9</i> | miR-193-3p                          | 1 |
| <i>circHDAC9</i> | miR-196a-3p                         | 1 |
| <i>circHDAC9</i> | miR-197-3p                          | 1 |
| <i>circHDAC9</i> | miR-198                             | 4 |
| <i>circHDAC9</i> | miR-200ab-5p                        | 1 |
| <i>circHDAC9</i> | miR-203a-3p.1                       | 2 |
| <i>circHDAC9</i> | miR-204-5p/211-5p                   | 2 |
| <i>circHDAC9</i> | miR-2114-5p                         | 1 |
| <i>circHDAC9</i> | miR-2116-3p                         | 2 |
| <i>circHDAC9</i> | miR-214-3p/3619-5p                  | 3 |
| <i>circHDAC9</i> | miR-214-5p                          | 1 |
| <i>circHDAC9</i> | miR-216a-5p                         | 1 |
| <i>circHDAC9</i> | miR-216b-3p                         | 1 |

|                  |                                              |   |
|------------------|----------------------------------------------|---|
| <i>circHDAC9</i> | miR-216b-5p                                  | 1 |
| <i>circHDAC9</i> | miR-217                                      | 1 |
| <i>circHDAC9</i> | miR-223-5p                                   | 1 |
| <i>circHDAC9</i> | miR-2278                                     | 1 |
| <i>circHDAC9</i> | miR-25-3p/32-5p/92-3p/363-3p/367-3p          | 1 |
| <i>circHDAC9</i> | miR-2861                                     | 2 |
| <i>circHDAC9</i> | miR-29-3p                                    | 2 |
| <i>circHDAC9</i> | miR-296-3p                                   | 1 |
| <i>circHDAC9</i> | miR-298                                      | 1 |
| <i>circHDAC9</i> | miR-3064-5p                                  | 2 |
| <i>circHDAC9</i> | miR-3065-3p                                  | 2 |
| <i>circHDAC9</i> | miR-30b-3p/1273h-5p/3689-3p/6779-5p/6780a-5p | 3 |
| <i>circHDAC9</i> | miR-30c-3p/6788-5p                           | 3 |
| <i>circHDAC9</i> | miR-31-3p                                    | 1 |
| <i>circHDAC9</i> | miR-3120-3p                                  | 2 |
| <i>circHDAC9</i> | miR-3123                                     | 2 |
| <i>circHDAC9</i> | miR-3126-5p                                  | 1 |
| <i>circHDAC9</i> | miR-3128                                     | 1 |
| <i>circHDAC9</i> | miR-3130-3p                                  | 1 |
| <i>circHDAC9</i> | miR-3146                                     | 1 |
| <i>circHDAC9</i> | miR-3148                                     | 3 |
| <i>circHDAC9</i> | miR-3150a-5p/3150b-5p                        | 2 |
| <i>circHDAC9</i> | miR-3151-3p                                  | 1 |
| <i>circHDAC9</i> | miR-3151-5p                                  | 1 |
| <i>circHDAC9</i> | miR-3158-3p                                  | 1 |
| <i>circHDAC9</i> | miR-3170/6855-5p                             | 3 |
| <i>circHDAC9</i> | miR-3174                                     | 1 |
| <i>circHDAC9</i> | miR-3177-3p                                  | 1 |
| <i>circHDAC9</i> | miR-3185                                     | 2 |
| <i>circHDAC9</i> | miR-3187-3p                                  | 4 |
| <i>circHDAC9</i> | miR-3194-5p                                  | 3 |
| <i>circHDAC9</i> | miR-3202                                     | 1 |
| <i>circHDAC9</i> | miR-323-3p                                   | 1 |
| <i>circHDAC9</i> | miR-338-5p                                   | 1 |
| <i>circHDAC9</i> | miR-340-3p/6827-3p                           | 1 |
| <i>circHDAC9</i> | miR-3622a-3p/3622b-3p                        | 3 |
| <i>circHDAC9</i> | miR-3663-3p                                  | 1 |
| <i>circHDAC9</i> | miR-3675-3p                                  | 1 |

|                  |                                    |   |
|------------------|------------------------------------|---|
| <i>circHDAC9</i> | miR-3687/4442                      | 2 |
| <i>circHDAC9</i> | miR-3691-3p                        | 1 |
| <i>circHDAC9</i> | miR-3713                           | 1 |
| <i>circHDAC9</i> | miR-376-3p                         | 2 |
| <i>circHDAC9</i> | miR-380-5p/563                     | 1 |
| <i>circHDAC9</i> | miR-381-3p                         | 2 |
| <i>circHDAC9</i> | miR-383-3p                         | 2 |
| <i>circHDAC9</i> | miR-383-5p.2                       | 2 |
| <i>circHDAC9</i> | miR-3908                           | 1 |
| <i>circHDAC9</i> | miR-3919                           | 2 |
| <i>circHDAC9</i> | miR-3922-5p                        | 5 |
| <i>circHDAC9</i> | miR-3924                           | 1 |
| <i>circHDAC9</i> | miR-3925-5p                        | 2 |
| <i>circHDAC9</i> | miR-3929/4419b/4478                | 1 |
| <i>circHDAC9</i> | miR-3941                           | 1 |
| <i>circHDAC9</i> | miR-3942-3p                        | 3 |
| <i>circHDAC9</i> | miR-3942-5p                        | 1 |
| <i>circHDAC9</i> | miR-3976                           | 1 |
| <i>circHDAC9</i> | miR-411-3p                         | 1 |
| <i>circHDAC9</i> | miR-421                            | 2 |
| <i>circHDAC9</i> | miR-425-5p                         | 2 |
| <i>circHDAC9</i> | miR-4260                           | 2 |
| <i>circHDAC9</i> | miR-4270/4441/6754-5p              | 2 |
| <i>circHDAC9</i> | miR-4275                           | 2 |
| <i>circHDAC9</i> | miR-4280                           | 2 |
| <i>circHDAC9</i> | miR-4291                           | 3 |
| <i>circHDAC9</i> | miR-4292/6791-5p                   | 1 |
| <i>circHDAC9</i> | miR-4308                           | 1 |
| <i>circHDAC9</i> | miR-431-3p                         | 1 |
| <i>circHDAC9</i> | miR-431-5p                         | 1 |
| <i>circHDAC9</i> | miR-4310/7157-5p                   | 2 |
| <i>circHDAC9</i> | miR-4311                           | 1 |
| <i>circHDAC9</i> | miR-4314                           | 1 |
| <i>circHDAC9</i> | miR-4316                           | 1 |
| <i>circHDAC9</i> | miR-432-5p                         | 1 |
| <i>circHDAC9</i> | miR-4325                           | 1 |
| <i>circHDAC9</i> | miR-4419a/4510/6127/6129/6130/6133 | 1 |
| <i>circHDAC9</i> | miR-4421/5699-3p                   | 2 |

|                  |                          |   |
|------------------|--------------------------|---|
| <i>circHDAC9</i> | miR-4427                 | 3 |
| <i>circHDAC9</i> | miR-4435                 | 4 |
| <i>circHDAC9</i> | miR-4446-3p              | 1 |
| <i>circHDAC9</i> | miR-4447/4472            | 1 |
| <i>circHDAC9</i> | miR-4474-5p              | 1 |
| <i>circHDAC9</i> | miR-4484                 | 2 |
| <i>circHDAC9</i> | miR-4496                 | 1 |
| <i>circHDAC9</i> | miR-4501                 | 1 |
| <i>circHDAC9</i> | miR-450a-2-3p            | 2 |
| <i>circHDAC9</i> | miR-451                  | 1 |
| <i>circHDAC9</i> | miR-4524b-3p             | 1 |
| <i>circHDAC9</i> | miR-4533                 | 1 |
| <i>circHDAC9</i> | miR-4536-3p              | 2 |
| <i>circHDAC9</i> | miR-455-3p.1             | 2 |
| <i>circHDAC9</i> | miR-4639-5p              | 1 |
| <i>circHDAC9</i> | miR-4659a-3p/4659b-3p    | 3 |
| <i>circHDAC9</i> | miR-4659a-5p/4659b-5p    | 1 |
| <i>circHDAC9</i> | miR-4661-3p              | 2 |
| <i>circHDAC9</i> | miR-4662a-3p             | 1 |
| <i>circHDAC9</i> | miR-4666a-3p             | 2 |
| <i>circHDAC9</i> | miR-4666a-5p             | 1 |
| <i>circHDAC9</i> | miR-4667-5p/4700-5p/8089 | 3 |
| <i>circHDAC9</i> | miR-4672                 | 1 |
| <i>circHDAC9</i> | miR-4680-3p              | 3 |
| <i>circHDAC9</i> | miR-4685-5p/6837-5p      | 6 |
| <i>circHDAC9</i> | miR-4687-3p              | 2 |
| <i>circHDAC9</i> | miR-4691-3p              | 4 |
| <i>circHDAC9</i> | miR-4693-3p              | 1 |
| <i>circHDAC9</i> | miR-4694-3p              | 2 |
| <i>circHDAC9</i> | miR-4695-3p              | 2 |
| <i>circHDAC9</i> | miR-4696                 | 2 |
| <i>circHDAC9</i> | miR-4704-3p              | 1 |
| <i>circHDAC9</i> | miR-4705                 | 1 |
| <i>circHDAC9</i> | miR-4709-3p              | 1 |
| <i>circHDAC9</i> | miR-4713-5p              | 2 |
| <i>circHDAC9</i> | miR-4714-3p              | 1 |
| <i>circHDAC9</i> | miR-4717-5p              | 4 |
| <i>circHDAC9</i> | miR-4718                 | 1 |

|                  |                             |   |
|------------------|-----------------------------|---|
| <i>circHDAC9</i> | miR-4720-5p/4799-3p/5588-5p | 1 |
| <i>circHDAC9</i> | miR-4724-5p                 | 2 |
| <i>circHDAC9</i> | miR-4736                    | 2 |
| <i>circHDAC9</i> | miR-4742-3p                 | 1 |
| <i>circHDAC9</i> | miR-4753-5p                 | 6 |
| <i>circHDAC9</i> | miR-4756-3p                 | 2 |
| <i>circHDAC9</i> | miR-4757-3p                 | 1 |
| <i>circHDAC9</i> | miR-4757-5p/6744-3p         | 2 |
| <i>circHDAC9</i> | miR-4762-5p                 | 3 |
| <i>circHDAC9</i> | miR-4766-3p                 | 1 |
| <i>circHDAC9</i> | miR-4778-5p                 | 1 |
| <i>circHDAC9</i> | miR-4793-3p                 | 1 |
| <i>circHDAC9</i> | miR-4797-5p                 | 1 |
| <i>circHDAC9</i> | miR-4802-3p                 | 1 |
| <i>circHDAC9</i> | miR-484/3155                | 2 |
| <i>circHDAC9</i> | miR-488-3p                  | 3 |
| <i>circHDAC9</i> | miR-491-5p                  | 1 |
| <i>circHDAC9</i> | miR-493-5p                  | 3 |
| <i>circHDAC9</i> | miR-494-3p                  | 1 |
| <i>circHDAC9</i> | miR-496.1                   | 1 |
| <i>circHDAC9</i> | miR-497-3p                  | 2 |
| <i>circHDAC9</i> | miR-4999-5p                 | 1 |
| <i>circHDAC9</i> | miR-5002-5p                 | 4 |
| <i>circHDAC9</i> | miR-5003-3p                 | 1 |
| <i>circHDAC9</i> | miR-5003-5p                 | 2 |
| <i>circHDAC9</i> | miR-5007-5p                 | 2 |
| <i>circHDAC9</i> | miR-5008-5p                 | 2 |
| <i>circHDAC9</i> | miR-501-3p/502-3p           | 1 |
| <i>circHDAC9</i> | miR-505-3p.1                | 1 |
| <i>circHDAC9</i> | miR-505-3p.2                | 2 |
| <i>circHDAC9</i> | miR-5088-3p                 | 6 |
| <i>circHDAC9</i> | miR-5088-5p                 | 1 |
| <i>circHDAC9</i> | miR-509-3-5p/509-5p/4418    | 1 |
| <i>circHDAC9</i> | miR-5095/7151-3p            | 2 |
| <i>circHDAC9</i> | miR-513b-5p                 | 2 |
| <i>circHDAC9</i> | miR-513c-5p/514b-5p         | 2 |
| <i>circHDAC9</i> | miR-518-3p                  | 1 |
| <i>circHDAC9</i> | miR-5187-3p                 | 3 |

|                  |                                                                   |   |
|------------------|-------------------------------------------------------------------|---|
| <i>circHDAC9</i> | miR-5190                                                          | 1 |
| <i>circHDAC9</i> | miR-5197-3p                                                       | 2 |
| <i>circHDAC9</i> | miR-522-3p                                                        | 2 |
| <i>circHDAC9</i> | miR-524-5p                                                        | 1 |
| <i>circHDAC9</i> | miR-525-5p                                                        | 1 |
| <i>circHDAC9</i> | miR-532-3p                                                        | 2 |
| <i>circHDAC9</i> | miR-539-5p                                                        | 1 |
| <i>circHDAC9</i> | miR-545-3p                                                        | 2 |
| <i>circHDAC9</i> | miR-548ac/548bb-3p/548d-3p/548h-3p/548z                           |   |
| <i>circHDAC9</i> | miR-548ah-5p/3609                                                 | 1 |
| <i>circHDAC9</i> | miR-548an                                                         | 2 |
| <i>circHDAC9</i> | miR-548aq-3p/548am-3p/548aj-3p/548ahl-3p/548ae-3p/548j-3p/548x-3p |   |
| <i>circHDAC9</i> | miR-548az-3p/548ar-3p/548a-3p/548e-3p/548f-3p                     |   |
| <i>circHDAC9</i> | miR-548az-5p/548t-5p                                              | 3 |
| <i>circHDAC9</i> | miR-548n                                                          | 3 |
| <i>circHDAC9</i> | miR-548p                                                          | 4 |
| <i>circHDAC9</i> | miR-548s                                                          | 4 |
| <i>circHDAC9</i> | miR-555                                                           | 2 |
| <i>circHDAC9</i> | miR-5572                                                          | 2 |
| <i>circHDAC9</i> | miR-5580-5p                                                       | 2 |
| <i>circHDAC9</i> | miR-5581-3p                                                       | 2 |
| <i>circHDAC9</i> | miR-5582-3p                                                       | 1 |
| <i>circHDAC9</i> | miR-5586-5p                                                       | 2 |
| <i>circHDAC9</i> | miR-5588-3p                                                       | 1 |
| <i>circHDAC9</i> | miR-5590-5p                                                       | 1 |
| <i>circHDAC9</i> | miR-562                                                           | 2 |
| <i>circHDAC9</i> | miR-567                                                           | 1 |
| <i>circHDAC9</i> | miR-5680                                                          | 1 |
| <i>circHDAC9</i> | miR-5681a                                                         | 1 |
| <i>circHDAC9</i> | miR-5692a                                                         | 2 |
| <i>circHDAC9</i> | miR-5694                                                          | 2 |
| <i>circHDAC9</i> | miR-5697                                                          | 2 |
| <i>circHDAC9</i> | miR-5700                                                          | 2 |
| <i>circHDAC9</i> | miR-5701                                                          | 2 |
| <i>circHDAC9</i> | miR-5702                                                          | 1 |
| <i>circHDAC9</i> | miR-575/4676-5p                                                   | 2 |
| <i>circHDAC9</i> | miR-582-3p                                                        | 2 |
| <i>circHDAC9</i> | miR-583                                                           | 1 |

|                  |                             |   |
|------------------|-----------------------------|---|
| <i>circHDAC9</i> | miR-588                     | 4 |
| <i>circHDAC9</i> | miR-589-3p                  | 1 |
| <i>circHDAC9</i> | miR-593-3p                  | 1 |
| <i>circHDAC9</i> | miR-6072/6891-3p            | 2 |
| <i>circHDAC9</i> | miR-6083                    | 3 |
| <i>circHDAC9</i> | miR-6089                    | 2 |
| <i>circHDAC9</i> | miR-6124                    | 3 |
| <i>circHDAC9</i> | miR-6132/6836-5p            | 2 |
| <i>circHDAC9</i> | miR-623                     | 2 |
| <i>circHDAC9</i> | miR-624-3p                  | 1 |
| <i>circHDAC9</i> | miR-624-5p                  | 2 |
| <i>circHDAC9</i> | miR-636                     | 2 |
| <i>circHDAC9</i> | miR-637                     | 3 |
| <i>circHDAC9</i> | miR-641/3617-5p             | 1 |
| <i>circHDAC9</i> | miR-642-3p                  | 2 |
| <i>circHDAC9</i> | miR-642b-5p                 | 2 |
| <i>circHDAC9</i> | miR-651-3p                  | 1 |
| <i>circHDAC9</i> | miR-660-5p                  | 2 |
| <i>circHDAC9</i> | miR-664a-3p                 | 1 |
| <i>circHDAC9</i> | miR-664a-5p/4794            | 2 |
| <i>circHDAC9</i> | miR-668-3p                  | 3 |
| <i>circHDAC9</i> | miR-6715a-3p                | 2 |
| <i>circHDAC9</i> | miR-6716-3p                 | 1 |
| <i>circHDAC9</i> | miR-6720-5p                 | 2 |
| <i>circHDAC9</i> | miR-6730-5p                 | 1 |
| <i>circHDAC9</i> | miR-6735-3p                 | 3 |
| <i>circHDAC9</i> | miR-6736-3p                 | 4 |
| <i>circHDAC9</i> | miR-6737-5p/6812-5p/6819-5p | 3 |
| <i>circHDAC9</i> | miR-6742-3p                 | 1 |
| <i>circHDAC9</i> | miR-6742-5p                 | 1 |
| <i>circHDAC9</i> | miR-6744-5p                 | 1 |
| <i>circHDAC9</i> | miR-6748-3p                 | 2 |
| <i>circHDAC9</i> | miR-6750-3p                 | 1 |
| <i>circHDAC9</i> | miR-6752-5p/6842-5p/7110-5p | 1 |
| <i>circHDAC9</i> | miR-6753-5p                 | 1 |
| <i>circHDAC9</i> | miR-6755-5p                 | 2 |
| <i>circHDAC9</i> | miR-6758-5p/6856-5p         | 2 |
| <i>circHDAC9</i> | miR-6762-5p/6845-5p         | 2 |

|                  |                     |   |
|------------------|---------------------|---|
| <i>circHDAC9</i> | miR-6765-3p         | 3 |
| <i>circHDAC9</i> | miR-6767-3p         | 1 |
| <i>circHDAC9</i> | miR-6768-3p         | 2 |
| <i>circHDAC9</i> | miR-6768-5p         | 2 |
| <i>circHDAC9</i> | miR-6770-5p         | 2 |
| <i>circHDAC9</i> | miR-6771-3p         | 2 |
| <i>circHDAC9</i> | miR-6783-5p         | 2 |
| <i>circHDAC9</i> | miR-6799-5p         | 2 |
| <i>circHDAC9</i> | miR-6801-5p         | 2 |
| <i>circHDAC9</i> | miR-6811-3p         | 1 |
| <i>circHDAC9</i> | miR-6814-3p/6872-5p | 1 |
| <i>circHDAC9</i> | miR-6815-3p         | 2 |
| <i>circHDAC9</i> | miR-6821-5p         | 2 |
| <i>circHDAC9</i> | miR-6822-3p         | 1 |
| <i>circHDAC9</i> | miR-6826-3p         | 1 |
| <i>circHDAC9</i> | miR-6835-5p         | 1 |
| <i>circHDAC9</i> | miR-6841-5p         | 2 |
| <i>circHDAC9</i> | miR-6843-3p/6848-3p | 1 |
| <i>circHDAC9</i> | miR-6845-3p         | 2 |
| <i>circHDAC9</i> | miR-6847-3p         | 2 |
| <i>circHDAC9</i> | miR-6851-3p         | 1 |
| <i>circHDAC9</i> | miR-6852-5p         | 1 |
| <i>circHDAC9</i> | miR-6854-5p         | 2 |
| <i>circHDAC9</i> | miR-6858-3p         | 2 |
| <i>circHDAC9</i> | miR-6867-3p         | 2 |
| <i>circHDAC9</i> | miR-6868-5p         | 1 |
| <i>circHDAC9</i> | miR-6871-3p         | 2 |
| <i>circHDAC9</i> | miR-6871-5p         | 2 |
| <i>circHDAC9</i> | miR-6872-3p         | 2 |
| <i>circHDAC9</i> | miR-6875-3p         | 3 |
| <i>circHDAC9</i> | miR-6882-5p         | 1 |
| <i>circHDAC9</i> | miR-6895-3p         | 1 |
| <i>circHDAC9</i> | miR-7-3p            | 1 |
| <i>circHDAC9</i> | miR-7106-5p         | 2 |
| <i>circHDAC9</i> | miR-7113-5p         | 6 |
| <i>circHDAC9</i> | miR-7114-5p         | 2 |
| <i>circHDAC9</i> | miR-7150            | 2 |
| <i>circHDAC9</i> | miR-7155-5p         | 3 |



|                  |                     |   |
|------------------|---------------------|---|
| <i>circHDAC9</i> | miR-7156-3p         | 2 |
| <i>circHDAC9</i> | miR-7159-5p         | 2 |
| <i>circHDAC9</i> | miR-7161-3p         | 1 |
| <i>circHDAC9</i> | miR-758-5p          | 1 |
| <i>circHDAC9</i> | miR-759             | 1 |
| <i>circHDAC9</i> | miR-760             | 1 |
| <i>circHDAC9</i> | miR-7641            | 3 |
| <i>circHDAC9</i> | miR-7703            | 1 |
| <i>circHDAC9</i> | miR-7845-5p         | 1 |
| <i>circHDAC9</i> | miR-7848-3p         | 3 |
| <i>circHDAC9</i> | miR-7849-3p         | 1 |
| <i>circHDAC9</i> | miR-7850-5p         | 2 |
| <i>circHDAC9</i> | miR-7973            | 1 |
| <i>circHDAC9</i> | miR-7974            | 2 |
| <i>circHDAC9</i> | miR-8062            | 1 |
| <i>circHDAC9</i> | miR-8070            | 1 |
| <i>circHDAC9</i> | miR-888-5p          | 2 |
| <i>circHDAC9</i> | miR-9-5p            | 3 |
| <i>circHDAC9</i> | miR-922             | 3 |
| <i>circHDAC9</i> | miR-92a-1-5p        | 1 |
| <i>circHDAC9</i> | miR-939-3p          | 1 |
| <i>circHDAC9</i> | miR-96-5p/1271-5p   | 1 |
| <i>circHDAC9</i> | miR-1231            | 1 |
| <i>circHDAC9</i> | miR-124-3p.1        | 1 |
| <i>circHDAC9</i> | miR-1249-5p/6797-5p | 1 |
| <i>circHDAC9</i> | miR-1288-3p         | 1 |
| <i>circHDAC9</i> | miR-1470            | 1 |
| <i>circHDAC9</i> | miR-208-3p          | 1 |
| <i>circHDAC9</i> | miR-25-5p           | 1 |
| <i>circHDAC9</i> | miR-2681-3p         | 1 |
| <i>circHDAC9</i> | miR-29b-1-5p        | 1 |
| <i>circHDAC9</i> | miR-3169            | 1 |
| <i>circHDAC9</i> | miR-338-3p          | 1 |
| <i>circHDAC9</i> | miR-3622a-5p        | 1 |
| <i>circHDAC9</i> | miR-3650            | 1 |
| <i>circHDAC9</i> | miR-3667-5p         | 1 |
| <i>circHDAC9</i> | miR-3671            | 1 |
| <i>circHDAC9</i> | miR-3714            | 1 |

|                   |                       |   |
|-------------------|-----------------------|---|
| <i>circHDAC9</i>  | miR-382-3p            | 1 |
| <i>circHDAC9</i>  | miR-3910              | 1 |
| <i>circHDAC9</i>  | miR-4297/5581-5p      | 1 |
| <i>circHDAC9</i>  | miR-4438              | 1 |
| <i>circHDAC9</i>  | miR-4455              | 1 |
| <i>circHDAC9</i>  | miR-4474-3p           | 1 |
| <i>circHDAC9</i>  | miR-4515              | 1 |
| <i>circHDAC9</i>  | miR-4530              | 1 |
| <i>circHDAC9</i>  | miR-4667-3p           | 1 |
| <i>circHDAC9</i>  | miR-4716-5p           | 1 |
| <i>circHDAC9</i>  | miR-4740-5p           | 1 |
| <i>circHDAC9</i>  | miR-4759              | 1 |
| <i>circHDAC9</i>  | miR-499a-3p/499b-3p   | 1 |
| <i>circHDAC9</i>  | miR-499a-5p           | 1 |
| <i>circHDAC9</i>  | miR-5000-3p           | 1 |
| <i>circHDAC9</i>  | miR-523-3p            | 1 |
| <i>circHDAC9</i>  | miR-539-3p            | 1 |
| <i>circHDAC9</i>  | miR-548a1/4445-3p     | 1 |
| <i>circHDAC9</i>  | miR-548a0-3p          | 1 |
| <i>circHDAC9</i>  | miR-5582-5p           | 1 |
| <i>circHDAC9</i>  | miR-586               | 1 |
| <i>circHDAC9</i>  | miR-591               | 1 |
| <i>circHDAC9</i>  | miR-602               | 1 |
| <i>circHDAC9</i>  | miR-605-5p            | 1 |
| <i>circHDAC9</i>  | miR-609               | 1 |
| <i>circHDAC9</i>  | miR-632/4288          | 1 |
| <i>circHDAC9</i>  | miR-6502-3p           | 1 |
| <i>circHDAC9</i>  | miR-654-3p            | 1 |
| <i>circHDAC9</i>  | miR-663b              | 1 |
| <i>circHDAC9</i>  | miR-6772-5p           | 1 |
| <i>circHDAC9</i>  | miR-6878-3p           | 1 |
| <i>circHDAC9</i>  | miR-7108-5p           | 1 |
| <i>circHDAC9</i>  | miR-7153-3p           | 1 |
| <i>circHDAC9</i>  | miR-8069              | 1 |
| <i>circHDAC9</i>  | miR-8083              | 1 |
| <i>circHDAC9</i>  | miR-96-3p             | 1 |
| <i>circHNRNPM</i> | let-7a-2-3p/let-7g-3p | 1 |
| <i>circHNRNPM</i> | let-7c-3p             | 1 |

|                   |                                    |   |
|-------------------|------------------------------------|---|
| <i>circHNRNPM</i> | miR-100-3p                         | 1 |
| <i>circHNRNPM</i> | miR-106a-3p                        | 1 |
| <i>circHNRNPM</i> | miR-106b-3p                        | 1 |
| <i>circHNRNPM</i> | miR-1199-5p/6751-3p                | 3 |
| <i>circHNRNPM</i> | miR-1224-3p                        | 1 |
| <i>circHNRNPM</i> | miR-1231                           | 1 |
| <i>circHNRNPM</i> | miR-1233-3p                        | 1 |
| <i>circHNRNPM</i> | miR-1236-3p                        | 3 |
| <i>circHNRNPM</i> | miR-1238-3p                        | 2 |
| <i>circHNRNPM</i> | miR-124-5p                         | 2 |
| <i>circHNRNPM</i> | miR-125-5p                         | 1 |
| <i>circHNRNPM</i> | miR-1256                           | 1 |
| <i>circHNRNPM</i> | miR-125a-3p                        | 3 |
| <i>circHNRNPM</i> | miR-1260a/1260b                    | 1 |
| <i>circHNRNPM</i> | miR-1264                           | 1 |
| <i>circHNRNPM</i> | miR-1266-5p/4518                   | 1 |
| <i>circHNRNPM</i> | miR-1273e                          | 1 |
| <i>circHNRNPM</i> | miR-1279                           | 1 |
| <i>circHNRNPM</i> | miR-128-1-5p                       | 1 |
| <i>circHNRNPM</i> | miR-1283                           | 1 |
| <i>circHNRNPM</i> | miR-1291/6775-3p                   | 1 |
| <i>circHNRNPM</i> | miR-1298-5p                        | 2 |
| <i>circHNRNPM</i> | miR-1299                           | 1 |
| <i>circHNRNPM</i> | miR-130b-5p                        | 1 |
| <i>circHNRNPM</i> | miR-134-5p                         | 1 |
| <i>circHNRNPM</i> | miR-135-5p                         | 1 |
| <i>circHNRNPM</i> | miR-136-5p                         | 1 |
| <i>circHNRNPM</i> | miR-140-3p.1                       | 1 |
| <i>circHNRNPM</i> | miR-140-3p.2                       | 1 |
| <i>circHNRNPM</i> | miR-141-3p/200-3p                  | 1 |
| <i>circHNRNPM</i> | miR-141-5p                         | 3 |
| <i>circHNRNPM</i> | miR-143-5p                         | 1 |
| <i>circHNRNPM</i> | miR-146b-3p                        | 1 |
| <i>circHNRNPM</i> | miR-149-3p/4728-5p/6785-5p/6883-5p | 1 |
| <i>circHNRNPM</i> | miR-150-5p                         | 1 |
| <i>circHNRNPM</i> | miR-153-3p                         | 1 |
| <i>circHNRNPM</i> | miR-155-5p                         | 1 |
| <i>circHNRNPM</i> | miR-16-2-3p/195-3p                 | 1 |

|                   |                     |   |
|-------------------|---------------------|---|
| <i>circHNRNPM</i> | miR-181a-3p         | 1 |
| <i>circHNRNPM</i> | miR-181d-3p         | 1 |
| <i>circHNRNPM</i> | miR-182-5p          | 1 |
| <i>circHNRNPM</i> | miR-1827            | 1 |
| <i>circHNRNPM</i> | miR-183-3p          | 2 |
| <i>circHNRNPM</i> | miR-185-3p          | 2 |
| <i>circHNRNPM</i> | miR-186-5p          | 1 |
| <i>circHNRNPM</i> | miR-188-3p          | 1 |
| <i>circHNRNPM</i> | miR-19-3p           | 1 |
| <i>circHNRNPM</i> | miR-1908-3p         | 1 |
| <i>circHNRNPM</i> | miR-1909-3p/6722-3p | 1 |
| <i>circHNRNPM</i> | miR-194-3p          | 1 |
| <i>circHNRNPM</i> | miR-197-3p          | 3 |
| <i>circHNRNPM</i> | miR-203a-3p.1       | 1 |
| <i>circHNRNPM</i> | miR-203b-5p/6718-5p | 1 |
| <i>circHNRNPM</i> | miR-205-3p          | 1 |
| <i>circHNRNPM</i> | miR-205-5p          | 3 |
| <i>circHNRNPM</i> | miR-2054            | 1 |
| <i>circHNRNPM</i> | miR-208-5p          | 2 |
| <i>circHNRNPM</i> | miR-21-3p/3591-3p   | 1 |
| <i>circHNRNPM</i> | miR-2110            | 1 |
| <i>circHNRNPM</i> | miR-2114-3p         | 1 |
| <i>circHNRNPM</i> | miR-2116-3p         | 1 |
| <i>circHNRNPM</i> | miR-216b-3p         | 1 |
| <i>circHNRNPM</i> | miR-23-3p           | 2 |
| <i>circHNRNPM</i> | miR-24-3p           | 1 |
| <i>circHNRNPM</i> | miR-26-3p           | 1 |
| <i>circHNRNPM</i> | miR-2681-5p         | 1 |
| <i>circHNRNPM</i> | miR-2682-3p/6781-3p | 1 |
| <i>circHNRNPM</i> | miR-27-3p           | 2 |
| <i>circHNRNPM</i> | miR-27b-5p          | 1 |
| <i>circHNRNPM</i> | miR-28-3p           | 1 |
| <i>circHNRNPM</i> | miR-296-5p          | 1 |
| <i>circHNRNPM</i> | miR-297             | 1 |
| <i>circHNRNPM</i> | miR-299-5p          | 1 |
| <i>circHNRNPM</i> | miR-29a-5p          | 2 |
| <i>circHNRNPM</i> | miR-29b-2-5p        | 1 |
| <i>circHNRNPM</i> | miR-30-3p           | 1 |

|                   |                     |   |
|-------------------|---------------------|---|
| <i>circHNRNPM</i> | miR-302b-5p/302d-5p | 2 |
| <i>circHNRNPM</i> | miR-302c-5p         | 1 |
| <i>circHNRNPM</i> | miR-302f            | 1 |
| <i>circHNRNPM</i> | miR-3065-3p         | 1 |
| <i>circHNRNPM</i> | miR-3065-5p         | 2 |
| <i>circHNRNPM</i> | miR-31-5p           | 1 |
| <i>circHNRNPM</i> | miR-3117-3p         | 1 |
| <i>circHNRNPM</i> | miR-3120-3p         | 1 |
| <i>circHNRNPM</i> | miR-3120-5p         | 1 |
| <i>circHNRNPM</i> | miR-3124-3p         | 3 |
| <i>circHNRNPM</i> | miR-3127-3p/6756-3p | 1 |
| <i>circHNRNPM</i> | miR-3127-5p         | 1 |
| <i>circHNRNPM</i> | miR-3133            | 1 |
| <i>circHNRNPM</i> | miR-3136-5p/4439    | 1 |
| <i>circHNRNPM</i> | miR-3140-3p         | 2 |
| <i>circHNRNPM</i> | miR-3145-5p         | 1 |
| <i>circHNRNPM</i> | miR-3146            | 1 |
| <i>circHNRNPM</i> | miR-3149            | 1 |
| <i>circHNRNPM</i> | miR-3150a-3p        | 1 |
| <i>circHNRNPM</i> | miR-3150b-3p        | 1 |
| <i>circHNRNPM</i> | miR-3152-5p         | 1 |
| <i>circHNRNPM</i> | miR-3156-3p         | 1 |
| <i>circHNRNPM</i> | miR-3164            | 1 |
| <i>circHNRNPM</i> | miR-3169            | 1 |
| <i>circHNRNPM</i> | miR-3173-5p         | 1 |
| <i>circHNRNPM</i> | miR-3179            | 1 |
| <i>circHNRNPM</i> | miR-3180-5p         | 1 |
| <i>circHNRNPM</i> | miR-3181            | 1 |
| <i>circHNRNPM</i> | miR-3184-3p         | 1 |
| <i>circHNRNPM</i> | miR-3194-3p         | 1 |
| <i>circHNRNPM</i> | miR-3194-5p         | 1 |
| <i>circHNRNPM</i> | miR-32-3p           | 1 |
| <i>circHNRNPM</i> | miR-3200-3p         | 2 |
| <i>circHNRNPM</i> | miR-3202            | 1 |
| <i>circHNRNPM</i> | miR-324-5p          | 1 |
| <i>circHNRNPM</i> | miR-329-3p/362-3p   | 1 |
| <i>circHNRNPM</i> | miR-329-5p          | 1 |
| <i>circHNRNPM</i> | miR-330-3p          | 1 |

|                   |                           |   |
|-------------------|---------------------------|---|
| <i>circHNRNPM</i> | miR-335-3p                | 2 |
| <i>circHNRNPM</i> | miR-338-5p                | 1 |
| <i>circHNRNPM</i> | miR-339-5p                | 1 |
| <i>circHNRNPM</i> | miR-340-5p                | 1 |
| <i>circHNRNPM</i> | miR-342-3p                | 2 |
| <i>circHNRNPM</i> | miR-346                   | 1 |
| <i>circHNRNPM</i> | miR-34a-3p                | 1 |
| <i>circHNRNPM</i> | miR-3529-3p               | 2 |
| <i>circHNRNPM</i> | miR-3617-3p               | 1 |
| <i>circHNRNPM</i> | miR-3622a-5p              | 1 |
| <i>circHNRNPM</i> | miR-3650                  | 1 |
| <i>circHNRNPM</i> | miR-3653-3p               | 1 |
| <i>circHNRNPM</i> | miR-3658                  | 3 |
| <i>circHNRNPM</i> | miR-3664-3p               | 1 |
| <i>circHNRNPM</i> | miR-3665                  | 1 |
| <i>circHNRNPM</i> | miR-3667-3p               | 1 |
| <i>circHNRNPM</i> | miR-3670                  | 4 |
| <i>circHNRNPM</i> | miR-3686                  | 1 |
| <i>circHNRNPM</i> | miR-3688-5p               | 1 |
| <i>circHNRNPM</i> | miR-3689d/6851-5p         | 1 |
| <i>circHNRNPM</i> | miR-3692-3p               | 1 |
| <i>circHNRNPM</i> | miR-371-5p                | 1 |
| <i>circHNRNPM</i> | miR-371b-5p/373-5p/616-5p | 1 |
| <i>circHNRNPM</i> | miR-372-5p                | 1 |
| <i>circHNRNPM</i> | miR-377-5p/6086           | 1 |
| <i>circHNRNPM</i> | miR-381-3p                | 2 |
| <i>circHNRNPM</i> | miR-383-3p                | 1 |
| <i>circHNRNPM</i> | miR-3918                  | 1 |
| <i>circHNRNPM</i> | miR-3934-3p               | 1 |
| <i>circHNRNPM</i> | miR-3934-5p               | 3 |
| <i>circHNRNPM</i> | miR-3941                  | 1 |
| <i>circHNRNPM</i> | miR-3943                  | 1 |
| <i>circHNRNPM</i> | miR-3944-3p               | 1 |
| <i>circHNRNPM</i> | miR-3944-5p               | 1 |
| <i>circHNRNPM</i> | miR-411-3p                | 4 |
| <i>circHNRNPM</i> | miR-412-3p/6754-3p        | 1 |
| <i>circHNRNPM</i> | miR-421                   | 2 |
| <i>circHNRNPM</i> | miR-4259                  | 1 |

|                   |                           |   |
|-------------------|---------------------------|---|
| <i>circHNRNPM</i> | miR-4267                  | 1 |
| <i>circHNRNPM</i> | miR-4269/6715b-5p         | 1 |
| <i>circHNRNPM</i> | miR-4271/4725-3p/6780b-5p | 1 |
| <i>circHNRNPM</i> | miR-4272                  | 2 |
| <i>circHNRNPM</i> | miR-4276                  | 1 |
| <i>circHNRNPM</i> | miR-4279                  | 1 |
| <i>circHNRNPM</i> | miR-4284                  | 1 |
| <i>circHNRNPM</i> | miR-4291                  | 1 |
| <i>circHNRNPM</i> | miR-4303                  | 1 |
| <i>circHNRNPM</i> | miR-4307                  | 2 |
| <i>circHNRNPM</i> | miR-4314                  | 1 |
| <i>circHNRNPM</i> | miR-4323                  | 1 |
| <i>circHNRNPM</i> | miR-4324                  | 1 |
| <i>circHNRNPM</i> | miR-4328                  | 1 |
| <i>circHNRNPM</i> | miR-433-3p                | 1 |
| <i>circHNRNPM</i> | miR-4330                  | 1 |
| <i>circHNRNPM</i> | miR-4421/5699-3p          | 1 |
| <i>circHNRNPM</i> | miR-4423-3p               | 1 |
| <i>circHNRNPM</i> | miR-4432                  | 1 |
| <i>circHNRNPM</i> | miR-4434/4516/5703        | 1 |
| <i>circHNRNPM</i> | miR-4438                  | 1 |
| <i>circHNRNPM</i> | miR-4446-5p               | 1 |
| <i>circHNRNPM</i> | miR-4452                  | 2 |
| <i>circHNRNPM</i> | miR-4453/4538             | 1 |
| <i>circHNRNPM</i> | miR-4464/4748             | 1 |
| <i>circHNRNPM</i> | miR-4475                  | 2 |
| <i>circHNRNPM</i> | miR-448                   | 1 |
| <i>circHNRNPM</i> | miR-4480                  | 1 |
| <i>circHNRNPM</i> | miR-4493                  | 1 |
| <i>circHNRNPM</i> | miR-4494                  | 1 |
| <i>circHNRNPM</i> | miR-4496                  | 1 |
| <i>circHNRNPM</i> | miR-4506                  | 1 |
| <i>circHNRNPM</i> | miR-4512                  | 1 |
| <i>circHNRNPM</i> | miR-4514/4692             | 1 |
| <i>circHNRNPM</i> | miR-4517                  | 1 |
| <i>circHNRNPM</i> | miR-4520-5p               | 1 |
| <i>circHNRNPM</i> | miR-4533                  | 1 |
| <i>circHNRNPM</i> | miR-4536-3p               | 1 |

|                   |                          |   |
|-------------------|--------------------------|---|
| <i>circHNRNPM</i> | miR-455-3p.2             | 1 |
| <i>circHNRNPM</i> | miR-4635                 | 2 |
| <i>circHNRNPM</i> | miR-4636                 | 1 |
| <i>circHNRNPM</i> | miR-4640-5p              | 1 |
| <i>circHNRNPM</i> | miR-4642                 | 1 |
| <i>circHNRNPM</i> | miR-4643                 | 2 |
| <i>circHNRNPM</i> | miR-4656                 | 1 |
| <i>circHNRNPM</i> | miR-4659a-5p/4659b-5p    | 2 |
| <i>circHNRNPM</i> | miR-4660                 | 2 |
| <i>circHNRNPM</i> | miR-4663                 | 1 |
| <i>circHNRNPM</i> | miR-4666a-3p             | 2 |
| <i>circHNRNPM</i> | miR-4667-5p/4700-5p/8089 | 1 |
| <i>circHNRNPM</i> | miR-4672                 | 1 |
| <i>circHNRNPM</i> | miR-4675/4741            | 1 |
| <i>circHNRNPM</i> | miR-4678                 | 2 |
| <i>circHNRNPM</i> | miR-4684-5p              | 1 |
| <i>circHNRNPM</i> | miR-4688/6743-5p         | 1 |
| <i>circHNRNPM</i> | miR-4690-5p              | 1 |
| <i>circHNRNPM</i> | miR-4691-5p/6792-3p      | 1 |
| <i>circHNRNPM</i> | miR-4695-5p              | 1 |
| <i>circHNRNPM</i> | miR-4699-3p              | 1 |
| <i>circHNRNPM</i> | miR-4703-3p              | 1 |
| <i>circHNRNPM</i> | miR-4705                 | 1 |
| <i>circHNRNPM</i> | miR-4709-5p              | 1 |
| <i>circHNRNPM</i> | miR-4710                 | 1 |
| <i>circHNRNPM</i> | miR-4714-3p              | 1 |
| <i>circHNRNPM</i> | miR-4715-5p              | 1 |
| <i>circHNRNPM</i> | miR-4717-3p              | 1 |
| <i>circHNRNPM</i> | miR-4719                 | 1 |
| <i>circHNRNPM</i> | miR-4727-5p              | 1 |
| <i>circHNRNPM</i> | miR-4732-3p              | 1 |
| <i>circHNRNPM</i> | miR-4739                 | 2 |
| <i>circHNRNPM</i> | miR-4742-3p              | 1 |
| <i>circHNRNPM</i> | miR-4742-5p              | 1 |
| <i>circHNRNPM</i> | miR-4747-5p/5196-5p      | 1 |
| <i>circHNRNPM</i> | miR-4750-5p              | 1 |
| <i>circHNRNPM</i> | miR-4753-3p              | 2 |
| <i>circHNRNPM</i> | miR-4755-5p/5006-3p      | 1 |



|                   |                     |   |
|-------------------|---------------------|---|
| <i>circHNRNPM</i> | miR-4759            | 1 |
| <i>circHNRNPM</i> | miR-4760-3p         | 2 |
| <i>circHNRNPM</i> | miR-4762-3p         | 1 |
| <i>circHNRNPM</i> | miR-4762-5p         | 2 |
| <i>circHNRNPM</i> | miR-4768-5p/6833-3p | 1 |
| <i>circHNRNPM</i> | miR-4769-3p/6817-5p | 1 |
| <i>circHNRNPM</i> | miR-4773            | 1 |
| <i>circHNRNPM</i> | miR-4774-3p         | 1 |
| <i>circHNRNPM</i> | miR-4777-3p         | 3 |
| <i>circHNRNPM</i> | miR-4778-5p         | 1 |
| <i>circHNRNPM</i> | miR-4779            | 1 |
| <i>circHNRNPM</i> | miR-4780            | 2 |
| <i>circHNRNPM</i> | miR-4782-5p/5706    | 1 |
| <i>circHNRNPM</i> | miR-4789-3p         | 2 |
| <i>circHNRNPM</i> | miR-4792            | 1 |
| <i>circHNRNPM</i> | miR-4797-5p         | 1 |
| <i>circHNRNPM</i> | miR-4799-5p         | 1 |
| <i>circHNRNPM</i> | miR-4802-5p         | 1 |
| <i>circHNRNPM</i> | miR-483-3p.2        | 1 |
| <i>circHNRNPM</i> | miR-493-3p          | 1 |
| <i>circHNRNPM</i> | miR-493-5p          | 1 |
| <i>circHNRNPM</i> | miR-494-3p          | 1 |
| <i>circHNRNPM</i> | miR-499a-3p/499b-3p | 1 |
| <i>circHNRNPM</i> | miR-499b-5p         | 1 |
| <i>circHNRNPM</i> | miR-5001-3p         | 1 |
| <i>circHNRNPM</i> | miR-5002-3p         | 1 |
| <i>circHNRNPM</i> | miR-5003-3p         | 2 |
| <i>circHNRNPM</i> | miR-5004-3p         | 1 |
| <i>circHNRNPM</i> | miR-502-5p          | 1 |
| <i>circHNRNPM</i> | miR-504-3p          | 1 |
| <i>circHNRNPM</i> | miR-505-3p.2        | 2 |
| <i>circHNRNPM</i> | miR-505-5p          | 1 |
| <i>circHNRNPM</i> | miR-508-5p          | 1 |
| <i>circHNRNPM</i> | miR-509-3p          | 1 |
| <i>circHNRNPM</i> | miR-5092            | 1 |
| <i>circHNRNPM</i> | miR-5094            | 1 |
| <i>circHNRNPM</i> | miR-5095/7151-3p    | 1 |
| <i>circHNRNPM</i> | miR-5096            | 1 |

|                   |                                                                    |   |
|-------------------|--------------------------------------------------------------------|---|
| <i>circHNRNPM</i> | miR-512-5p                                                         | 1 |
| <i>circHNRNPM</i> | miR-513a-5p                                                        | 2 |
| <i>circHNRNPM</i> | miR-516b-5p                                                        | 1 |
| <i>circHNRNPM</i> | miR-517-3p                                                         | 1 |
| <i>circHNRNPM</i> | miR-518-3p                                                         | 1 |
| <i>circHNRNPM</i> | miR-5193                                                           | 1 |
| <i>circHNRNPM</i> | miR-520f-5p                                                        | 1 |
| <i>circHNRNPM</i> | miR-520g-5p                                                        | 1 |
| <i>circHNRNPM</i> | miR-521                                                            | 1 |
| <i>circHNRNPM</i> | miR-524-5p                                                         | 2 |
| <i>circHNRNPM</i> | miR-525-5p                                                         | 1 |
| <i>circHNRNPM</i> | miR-526b-5p                                                        | 2 |
| <i>circHNRNPM</i> | miR-532-3p                                                         | 1 |
| <i>circHNRNPM</i> | miR-539-5p                                                         | 1 |
| <i>circHNRNPM</i> | miR-544b                                                           | 1 |
| <i>circHNRNPM</i> | miR-545-3p                                                         | 2 |
| <i>circHNRNPM</i> | miR-545-5p                                                         | 1 |
| <i>circHNRNPM</i> | miR-548ai/548ag/548ba/570-5p                                       | 2 |
| <i>circHNRNPM</i> | miR-548av-5p/548k/8054                                             | 1 |
| <i>circHNRNPM</i> | miR-548ay-5p/548au-5p/548as-5p/548ar-5p/548aq-5p/548ap-5p/548am-5p | 1 |
| <i>circHNRNPM</i> | miR-548az-5p/548t-5p                                               | 1 |
| <i>circHNRNPM</i> | miR-548e-5p                                                        | 1 |
| <i>circHNRNPM</i> | miR-548l                                                           | 1 |
| <i>circHNRNPM</i> | miR-548m                                                           | 1 |
| <i>circHNRNPM</i> | miR-548n                                                           | 1 |
| <i>circHNRNPM</i> | miR-551b-5p                                                        | 1 |
| <i>circHNRNPM</i> | miR-552-3p                                                         | 2 |
| <i>circHNRNPM</i> | miR-552-5p                                                         | 1 |
| <i>circHNRNPM</i> | miR-5571-5p                                                        | 1 |
| <i>circHNRNPM</i> | miR-5582-5p                                                        | 1 |
| <i>circHNRNPM</i> | miR-5583-3p                                                        | 1 |
| <i>circHNRNPM</i> | miR-5589-3p                                                        | 1 |
| <i>circHNRNPM</i> | miR-5590-5p                                                        | 2 |
| <i>circHNRNPM</i> | miR-562                                                            | 1 |
| <i>circHNRNPM</i> | miR-567                                                            | 4 |
| <i>circHNRNPM</i> | miR-5683                                                           | 1 |
| <i>circHNRNPM</i> | miR-5687                                                           | 1 |
| <i>circHNRNPM</i> | miR-5689                                                           | 1 |

|                   |                  |   |
|-------------------|------------------|---|
| <i>circHNRNPM</i> | miR-5691         | 2 |
| <i>circHNRNPM</i> | miR-5693         | 1 |
| <i>circHNRNPM</i> | miR-570-3p       | 2 |
| <i>circHNRNPM</i> | miR-5700         | 2 |
| <i>circHNRNPM</i> | miR-572          | 1 |
| <i>circHNRNPM</i> | miR-574-3p       | 1 |
| <i>circHNRNPM</i> | miR-586          | 2 |
| <i>circHNRNPM</i> | miR-587          | 2 |
| <i>circHNRNPM</i> | miR-602          | 1 |
| <i>circHNRNPM</i> | miR-603          | 1 |
| <i>circHNRNPM</i> | miR-605-3p       | 1 |
| <i>circHNRNPM</i> | miR-606          | 1 |
| <i>circHNRNPM</i> | miR-6074         | 1 |
| <i>circHNRNPM</i> | miR-6077         | 1 |
| <i>circHNRNPM</i> | miR-6079         | 1 |
| <i>circHNRNPM</i> | miR-6085/6813-5p | 1 |
| <i>circHNRNPM</i> | miR-6126         | 1 |
| <i>circHNRNPM</i> | miR-6128         | 1 |
| <i>circHNRNPM</i> | miR-6132/6836-5p | 1 |
| <i>circHNRNPM</i> | miR-6165         | 1 |
| <i>circHNRNPM</i> | miR-617          | 1 |
| <i>circHNRNPM</i> | miR-624-3p       | 1 |
| <i>circHNRNPM</i> | miR-627-3p       | 1 |
| <i>circHNRNPM</i> | miR-629-3p       | 1 |
| <i>circHNRNPM</i> | miR-632/4288     | 1 |
| <i>circHNRNPM</i> | miR-637          | 1 |
| <i>circHNRNPM</i> | miR-642-3p       | 1 |
| <i>circHNRNPM</i> | miR-643          | 1 |
| <i>circHNRNPM</i> | miR-645          | 1 |
| <i>circHNRNPM</i> | miR-6501-3p      | 1 |
| <i>circHNRNPM</i> | miR-6504-3p      | 1 |
| <i>circHNRNPM</i> | miR-6505-3p      | 1 |
| <i>circHNRNPM</i> | miR-6506-3p      | 1 |
| <i>circHNRNPM</i> | miR-6508-3p      | 1 |
| <i>circHNRNPM</i> | miR-651-5p       | 1 |
| <i>circHNRNPM</i> | miR-6510-5p      | 1 |
| <i>circHNRNPM</i> | miR-6511-3p      | 3 |
| <i>circHNRNPM</i> | miR-6514-5p      | 1 |

|                   |                     |   |
|-------------------|---------------------|---|
| <i>circHNRNPM</i> | miR-6515-3p         | 3 |
| <i>circHNRNPM</i> | miR-655-5p          | 1 |
| <i>circHNRNPM</i> | miR-657             | 1 |
| <i>circHNRNPM</i> | miR-659-3p          | 1 |
| <i>circHNRNPM</i> | miR-660-3p          | 1 |
| <i>circHNRNPM</i> | miR-664a-3p         | 1 |
| <i>circHNRNPM</i> | miR-670-3p          | 2 |
| <i>circHNRNPM</i> | miR-670-5p          | 1 |
| <i>circHNRNPM</i> | miR-6716-3p         | 1 |
| <i>circHNRNPM</i> | miR-6716-5p         | 1 |
| <i>circHNRNPM</i> | miR-6728-3p         | 1 |
| <i>circHNRNPM</i> | miR-6729-3p         | 1 |
| <i>circHNRNPM</i> | miR-6731-3p         | 1 |
| <i>circHNRNPM</i> | miR-6731-5p/8085    | 1 |
| <i>circHNRNPM</i> | miR-6734-3p         | 1 |
| <i>circHNRNPM</i> | miR-6740-3p         | 1 |
| <i>circHNRNPM</i> | miR-6748-3p         | 1 |
| <i>circHNRNPM</i> | miR-6749-3p         | 1 |
| <i>circHNRNPM</i> | miR-675-3p          | 1 |
| <i>circHNRNPM</i> | miR-6753-5p         | 1 |
| <i>circHNRNPM</i> | miR-6758-3p         | 3 |
| <i>circHNRNPM</i> | miR-676-3p          | 1 |
| <i>circHNRNPM</i> | miR-6760-5p         | 2 |
| <i>circHNRNPM</i> | miR-6762-5p/6845-5p | 1 |
| <i>circHNRNPM</i> | miR-6769a-3p        | 1 |
| <i>circHNRNPM</i> | miR-6776-3p         | 1 |
| <i>circHNRNPM</i> | miR-6778-3p         | 1 |
| <i>circHNRNPM</i> | miR-6780a-3p        | 2 |
| <i>circHNRNPM</i> | miR-6780b-3p        | 2 |
| <i>circHNRNPM</i> | miR-6784-3p/6862-3p | 3 |
| <i>circHNRNPM</i> | miR-6791-3p/6829-3p | 1 |
| <i>circHNRNPM</i> | miR-6796-3p         | 1 |
| <i>circHNRNPM</i> | miR-6798-5p         | 1 |
| <i>circHNRNPM</i> | miR-6799-5p         | 1 |
| <i>circHNRNPM</i> | miR-6800-5p         | 1 |
| <i>circHNRNPM</i> | miR-6802-5p         | 1 |
| <i>circHNRNPM</i> | miR-6809-3p         | 1 |
| <i>circHNRNPM</i> | miR-6809-5p         | 1 |

|                   |                     |   |
|-------------------|---------------------|---|
| <i>circHNRNPM</i> | miR-6810-5p         | 1 |
| <i>circHNRNPM</i> | miR-6812-3p         | 1 |
| <i>circHNRNPM</i> | miR-6813-3p         | 2 |
| <i>circHNRNPM</i> | miR-6816-3p         | 1 |
| <i>circHNRNPM</i> | miR-6817-3p         | 2 |
| <i>circHNRNPM</i> | miR-6819-3p/6877-3p | 1 |
| <i>circHNRNPM</i> | miR-6821-5p         | 1 |
| <i>circHNRNPM</i> | miR-6822-3p         | 1 |
| <i>circHNRNPM</i> | miR-6826-3p         | 1 |
| <i>circHNRNPM</i> | miR-6827-5p         | 1 |
| <i>circHNRNPM</i> | miR-6829-5p         | 1 |
| <i>circHNRNPM</i> | miR-6830-3p         | 1 |
| <i>circHNRNPM</i> | miR-6830-5p         | 1 |
| <i>circHNRNPM</i> | miR-6834-3p         | 1 |
| <i>circHNRNPM</i> | miR-6836-3p         | 1 |
| <i>circHNRNPM</i> | miR-6837-3p         | 1 |
| <i>circHNRNPM</i> | miR-6843-3p/6848-3p | 1 |
| <i>circHNRNPM</i> | miR-6844            | 1 |
| <i>circHNRNPM</i> | miR-6851-3p         | 1 |
| <i>circHNRNPM</i> | miR-6854-5p         | 2 |
| <i>circHNRNPM</i> | miR-6857-5p         | 1 |
| <i>circHNRNPM</i> | miR-6864-5p         | 1 |
| <i>circHNRNPM</i> | miR-6866-5p         | 1 |
| <i>circHNRNPM</i> | miR-6868-3p         | 4 |
| <i>circHNRNPM</i> | miR-6871-5p         | 1 |
| <i>circHNRNPM</i> | miR-6874-5p         | 1 |
| <i>circHNRNPM</i> | miR-6878-5p         | 1 |
| <i>circHNRNPM</i> | miR-6881-3p         | 2 |
| <i>circHNRNPM</i> | miR-6886-5p         | 3 |
| <i>circHNRNPM</i> | miR-6894-5p         | 1 |
| <i>circHNRNPM</i> | miR-6895-5p         | 1 |
| <i>circHNRNPM</i> | miR-7-3p            | 1 |
| <i>circHNRNPM</i> | miR-7-5p            | 1 |
| <i>circHNRNPM</i> | miR-708-3p          | 1 |
| <i>circHNRNPM</i> | miR-7106-5p         | 1 |
| <i>circHNRNPM</i> | miR-7110-3p         | 2 |
| <i>circHNRNPM</i> | miR-7111-3p         | 2 |
| <i>circHNRNPM</i> | miR-7154-3p         | 1 |

|                   |                           |   |
|-------------------|---------------------------|---|
| <i>circHNRNPM</i> | miR-7154-5p               | 1 |
| <i>circHNRNPM</i> | miR-7155-5p               | 1 |
| <i>circHNRNPM</i> | miR-7158-5p               | 1 |
| <i>circHNRNPM</i> | miR-7159-5p               | 2 |
| <i>circHNRNPM</i> | miR-7160-3p               | 1 |
| <i>circHNRNPM</i> | miR-7160-5p               | 1 |
| <i>circHNRNPM</i> | miR-718                   | 3 |
| <i>circHNRNPM</i> | miR-7515                  | 1 |
| <i>circHNRNPM</i> | miR-760                   | 1 |
| <i>circHNRNPM</i> | miR-762/4492/4498/5001-5p | 1 |
| <i>circHNRNPM</i> | miR-765                   | 1 |
| <i>circHNRNPM</i> | miR-766-5p                | 1 |
| <i>circHNRNPM</i> | miR-7848-3p               | 1 |
| <i>circHNRNPM</i> | miR-7856-5p               | 1 |
| <i>circHNRNPM</i> | miR-7976                  | 1 |
| <i>circHNRNPM</i> | miR-802                   | 1 |
| <i>circHNRNPM</i> | miR-8057                  | 1 |
| <i>circHNRNPM</i> | miR-8064                  | 1 |
| <i>circHNRNPM</i> | miR-8068                  | 1 |
| <i>circHNRNPM</i> | miR-8074                  | 1 |
| <i>circHNRNPM</i> | miR-8076                  | 1 |
| <i>circHNRNPM</i> | miR-8077                  | 1 |
| <i>circHNRNPM</i> | miR-8080                  | 1 |
| <i>circHNRNPM</i> | miR-8083                  | 1 |
| <i>circHNRNPM</i> | miR-8087                  | 1 |
| <i>circHNRNPM</i> | miR-8485                  | 1 |
| <i>circHNRNPM</i> | miR-875-5p                | 3 |
| <i>circHNRNPM</i> | miR-877-5p                | 1 |
| <i>circHNRNPM</i> | miR-885-5p                | 3 |
| <i>circHNRNPM</i> | miR-889-5p                | 1 |
| <i>circHNRNPM</i> | miR-891a-3p               | 1 |
| <i>circHNRNPM</i> | miR-891b                  | 1 |
| <i>circHNRNPM</i> | miR-942-5p                | 1 |
| <i>circHNRNPM</i> | miR-943                   | 1 |
| <i>circHNRNPM</i> | miR-96-5p/1271-5p         | 1 |
| <i>circHNRNPM</i> | miR-99-3p                 | 1 |
| <i>circHOMER1</i> | miR-1-5p                  | 2 |
| <i>circHOMER1</i> | miR-101-3p.2              | 1 |

|                   |                     |   |
|-------------------|---------------------|---|
| <i>circHOMER1</i> | miR-101-5p          | 1 |
| <i>circHOMER1</i> | miR-105-5p          | 2 |
| <i>circHOMER1</i> | miR-1180-5p         | 1 |
| <i>circHOMER1</i> | miR-1184            | 1 |
| <i>circHOMER1</i> | miR-1199-5p/6751-3p | 1 |
| <i>circHOMER1</i> | miR-1202/3972       | 1 |
| <i>circHOMER1</i> | miR-1205            | 1 |
| <i>circHOMER1</i> | miR-1224-3p         | 1 |
| <i>circHOMER1</i> | miR-1225-5p         | 1 |
| <i>circHOMER1</i> | miR-1226-3p         | 1 |
| <i>circHOMER1</i> | miR-1227-5p         | 1 |
| <i>circHOMER1</i> | miR-1229-5p         | 1 |
| <i>circHOMER1</i> | miR-1238-5p/4758-5p | 1 |
| <i>circHOMER1</i> | miR-124-5p          | 2 |
| <i>circHOMER1</i> | miR-1243            | 2 |
| <i>circHOMER1</i> | miR-1245b-3p        | 1 |
| <i>circHOMER1</i> | miR-1246            | 1 |
| <i>circHOMER1</i> | miR-1250-3p         | 1 |
| <i>circHOMER1</i> | miR-1252-3p         | 1 |
| <i>circHOMER1</i> | miR-1252-5p         | 2 |
| <i>circHOMER1</i> | miR-1253            | 1 |
| <i>circHOMER1</i> | miR-126-5p          | 1 |
| <i>circHOMER1</i> | miR-1272            | 1 |
| <i>circHOMER1</i> | miR-1273g-3p        | 1 |
| <i>circHOMER1</i> | miR-1273h-3p        | 1 |
| <i>circHOMER1</i> | miR-1277-5p         | 1 |
| <i>circHOMER1</i> | miR-1283            | 1 |
| <i>circHOMER1</i> | miR-1285-5p         | 1 |
| <i>circHOMER1</i> | miR-1287-5p         | 1 |
| <i>circHOMER1</i> | miR-1289            | 1 |
| <i>circHOMER1</i> | miR-129-3p          | 1 |
| <i>circHOMER1</i> | miR-1296-3p         | 1 |
| <i>circHOMER1</i> | miR-1301-3p         | 1 |
| <i>circHOMER1</i> | miR-1304-3p         | 1 |
| <i>circHOMER1</i> | miR-130b-5p         | 1 |
| <i>circHOMER1</i> | miR-1322            | 1 |
| <i>circHOMER1</i> | miR-1324            | 2 |
| <i>circHOMER1</i> | miR-134-5p          | 2 |

|                   |                                    |   |
|-------------------|------------------------------------|---|
| <i>circHOMER1</i> | miR-135a-3p                        | 1 |
| <i>circHOMER1</i> | miR-138-1-3p                       | 1 |
| <i>circHOMER1</i> | miR-139-5p                         | 1 |
| <i>circHOMER1</i> | miR-141-5p                         | 1 |
| <i>circHOMER1</i> | miR-143-5p                         | 3 |
| <i>circHOMER1</i> | miR-146-5p                         | 1 |
| <i>circHOMER1</i> | miR-146b-3p                        | 1 |
| <i>circHOMER1</i> | miR-149-3p/4728-5p/6785-5p/6883-5p | 1 |
| <i>circHOMER1</i> | miR-149-5p                         | 1 |
| <i>circHOMER1</i> | miR-153-5p                         | 1 |
| <i>circHOMER1</i> | miR-154-5p                         | 1 |
| <i>circHOMER1</i> | miR-155-5p                         | 2 |
| <i>circHOMER1</i> | miR-1587/3620-5p                   | 1 |
| <i>circHOMER1</i> | miR-17-3p                          | 1 |
| <i>circHOMER1</i> | miR-181-3p/4420                    | 1 |
| <i>circHOMER1</i> | miR-1825                           | 1 |
| <i>circHOMER1</i> | miR-186-5p                         | 3 |
| <i>circHOMER1</i> | miR-187-5p                         | 1 |
| <i>circHOMER1</i> | miR-1908-5p                        | 1 |
| <i>circHOMER1</i> | miR-190a-3p                        | 1 |
| <i>circHOMER1</i> | miR-192-3p                         | 2 |
| <i>circHOMER1</i> | miR-193-3p                         | 1 |
| <i>circHOMER1</i> | miR-194-3p                         | 1 |
| <i>circHOMER1</i> | miR-196b-3p                        | 1 |
| <i>circHOMER1</i> | miR-199-5p                         | 1 |
| <i>circHOMER1</i> | miR-200c-5p/550a-3p                | 2 |
| <i>circHOMER1</i> | miR-202-5p                         | 1 |
| <i>circHOMER1</i> | miR-203a-3p.1                      | 1 |
| <i>circHOMER1</i> | miR-203b-3p                        | 3 |
| <i>circHOMER1</i> | miR-204-5p/211-5p                  | 1 |
| <i>circHOMER1</i> | miR-205-5p                         | 1 |
| <i>circHOMER1</i> | miR-208-3p                         | 2 |
| <i>circHOMER1</i> | miR-21-3p/3591-3p                  | 3 |
| <i>circHOMER1</i> | miR-2115-3p                        | 2 |
| <i>circHOMER1</i> | miR-2117                           | 1 |
| <i>circHOMER1</i> | miR-215-3p                         | 1 |
| <i>circHOMER1</i> | miR-216b-3p                        | 2 |
| <i>circHOMER1</i> | miR-217                            | 1 |



|                   |                                              |   |
|-------------------|----------------------------------------------|---|
| <i>circHOMER1</i> | miR-22-3p                                    | 1 |
| <i>circHOMER1</i> | miR-223-5p                                   | 1 |
| <i>circHOMER1</i> | miR-2277-3p                                  | 1 |
| <i>circHOMER1</i> | miR-23-3p                                    | 1 |
| <i>circHOMER1</i> | miR-24-5p                                    | 1 |
| <i>circHOMER1</i> | miR-2467-5p                                  | 1 |
| <i>circHOMER1</i> | miR-26-3p                                    | 2 |
| <i>circHOMER1</i> | miR-27-3p                                    | 1 |
| <i>circHOMER1</i> | miR-298                                      | 2 |
| <i>circHOMER1</i> | miR-30-3p                                    | 1 |
| <i>circHOMER1</i> | miR-301a-5p/301b-5p                          | 1 |
| <i>circHOMER1</i> | miR-302b-5p/302d-5p                          | 2 |
| <i>circHOMER1</i> | miR-302c-5p                                  | 1 |
| <i>circHOMER1</i> | miR-3064-3p                                  | 1 |
| <i>circHOMER1</i> | miR-3065-3p                                  | 2 |
| <i>circHOMER1</i> | miR-30b-3p/1273h-5p/3689-3p/6779-5p/6780a-5p |   |
| <i>circHOMER1</i> | miR-30c-3p/6788-5p                           | 1 |
| <i>circHOMER1</i> | miR-31-3p                                    | 1 |
| <i>circHOMER1</i> | miR-3117-5p                                  | 2 |
| <i>circHOMER1</i> | miR-3120-3p                                  | 2 |
| <i>circHOMER1</i> | miR-3121-3p                                  | 2 |
| <i>circHOMER1</i> | miR-3122/3913-5p                             | 2 |
| <i>circHOMER1</i> | miR-3123                                     | 2 |
| <i>circHOMER1</i> | miR-3125/3916/6859-5p                        | 2 |
| <i>circHOMER1</i> | miR-3126-5p                                  | 1 |
| <i>circHOMER1</i> | miR-3130-3p                                  | 1 |
| <i>circHOMER1</i> | miR-3133                                     | 3 |
| <i>circHOMER1</i> | miR-3134                                     | 1 |
| <i>circHOMER1</i> | miR-3135b                                    | 1 |
| <i>circHOMER1</i> | miR-3136-5p/4439                             | 2 |
| <i>circHOMER1</i> | miR-3148                                     | 1 |
| <i>circHOMER1</i> | miR-3152-3p                                  | 2 |
| <i>circHOMER1</i> | miR-3158-3p                                  | 1 |
| <i>circHOMER1</i> | miR-3158-5p                                  | 1 |
| <i>circHOMER1</i> | miR-3161                                     | 1 |
| <i>circHOMER1</i> | miR-3162-5p                                  | 1 |
| <i>circHOMER1</i> | miR-3164                                     | 2 |
| <i>circHOMER1</i> | miR-3173-5p                                  | 1 |

|                   |                           |   |
|-------------------|---------------------------|---|
| <i>circHOMER1</i> | miR-3185                  | 2 |
| <i>circHOMER1</i> | miR-3187-3p               | 1 |
| <i>circHOMER1</i> | miR-3188                  | 1 |
| <i>circHOMER1</i> | miR-3198/4309             | 1 |
| <i>circHOMER1</i> | miR-3200-3p               | 1 |
| <i>circHOMER1</i> | miR-320e                  | 1 |
| <i>circHOMER1</i> | miR-33-5p                 | 1 |
| <i>circHOMER1</i> | miR-335-3p                | 1 |
| <i>circHOMER1</i> | miR-335-5p                | 2 |
| <i>circHOMER1</i> | miR-338-3p                | 1 |
| <i>circHOMER1</i> | miR-338-5p                | 2 |
| <i>circHOMER1</i> | miR-346                   | 1 |
| <i>circHOMER1</i> | miR-34a-3p                | 1 |
| <i>circHOMER1</i> | miR-34b-3p                | 1 |
| <i>circHOMER1</i> | miR-34c-3p                | 1 |
| <i>circHOMER1</i> | miR-3607-3p               | 1 |
| <i>circHOMER1</i> | miR-3611                  | 1 |
| <i>circHOMER1</i> | miR-3612                  | 1 |
| <i>circHOMER1</i> | miR-3617-3p               | 1 |
| <i>circHOMER1</i> | miR-3622a-3p/3622b-3p     | 1 |
| <i>circHOMER1</i> | miR-3646                  | 1 |
| <i>circHOMER1</i> | miR-365-3p                | 2 |
| <i>circHOMER1</i> | miR-3651                  | 1 |
| <i>circHOMER1</i> | miR-3654                  | 2 |
| <i>circHOMER1</i> | miR-3659                  | 1 |
| <i>circHOMER1</i> | miR-3670                  | 1 |
| <i>circHOMER1</i> | miR-3678-3p               | 1 |
| <i>circHOMER1</i> | miR-3680-3p               | 1 |
| <i>circHOMER1</i> | miR-3680-5p               | 1 |
| <i>circHOMER1</i> | miR-3682-3p               | 1 |
| <i>circHOMER1</i> | miR-3685                  | 1 |
| <i>circHOMER1</i> | miR-3688-3p               | 2 |
| <i>circHOMER1</i> | miR-369-3p                | 1 |
| <i>circHOMER1</i> | miR-3692-5p               | 1 |
| <i>circHOMER1</i> | miR-370-3p                | 1 |
| <i>circHOMER1</i> | miR-371-5p                | 2 |
| <i>circHOMER1</i> | miR-371b-5p/373-5p/616-5p | 2 |
| <i>circHOMER1</i> | miR-372-5p                | 2 |

|                   |                     |   |
|-------------------|---------------------|---|
| <i>circHOMER1</i> | miR-374b-3p         | 1 |
| <i>circHOMER1</i> | miR-376c-3p         | 1 |
| <i>circHOMER1</i> | miR-381-3p          | 2 |
| <i>circHOMER1</i> | miR-382-5p          | 1 |
| <i>circHOMER1</i> | miR-383-3p          | 2 |
| <i>circHOMER1</i> | miR-384             | 1 |
| <i>circHOMER1</i> | miR-3908            | 1 |
| <i>circHOMER1</i> | miR-3914            | 1 |
| <i>circHOMER1</i> | miR-3919            | 1 |
| <i>circHOMER1</i> | miR-3921/4653-5p    | 1 |
| <i>circHOMER1</i> | miR-3924            | 1 |
| <i>circHOMER1</i> | miR-3925-5p         | 2 |
| <i>circHOMER1</i> | miR-3927-5p         | 2 |
| <i>circHOMER1</i> | miR-3928-3p         | 2 |
| <i>circHOMER1</i> | miR-3928-5p/6806-3p | 1 |
| <i>circHOMER1</i> | miR-3929/4419b/4478 | 1 |
| <i>circHOMER1</i> | miR-3937            | 1 |
| <i>circHOMER1</i> | miR-3942-3p         | 1 |
| <i>circHOMER1</i> | miR-3942-5p         | 1 |
| <i>circHOMER1</i> | miR-3975            | 1 |
| <i>circHOMER1</i> | miR-3978            | 1 |
| <i>circHOMER1</i> | miR-411-5p.2        | 2 |
| <i>circHOMER1</i> | miR-412-3p/6754-3p  | 1 |
| <i>circHOMER1</i> | miR-425-5p          | 1 |
| <i>circHOMER1</i> | miR-4257            | 1 |
| <i>circHOMER1</i> | miR-4260            | 1 |
| <i>circHOMER1</i> | miR-4261            | 1 |
| <i>circHOMER1</i> | miR-4269/6715b-5p   | 1 |
| <i>circHOMER1</i> | miR-4273/7156-5p    | 1 |
| <i>circHOMER1</i> | miR-4279            | 2 |
| <i>circHOMER1</i> | miR-4282            | 1 |
| <i>circHOMER1</i> | miR-4283            | 1 |
| <i>circHOMER1</i> | miR-4291            | 3 |
| <i>circHOMER1</i> | miR-4294            | 1 |
| <i>circHOMER1</i> | miR-4303            | 1 |
| <i>circHOMER1</i> | miR-4317            | 1 |
| <i>circHOMER1</i> | miR-4318            | 1 |
| <i>circHOMER1</i> | miR-4320            | 3 |

|                   |                                    |   |
|-------------------|------------------------------------|---|
| <i>circHOMER1</i> | miR-4330                           | 4 |
| <i>circHOMER1</i> | miR-4417                           | 1 |
| <i>circHOMER1</i> | miR-4419a/4510/6127/6129/6130/6133 | 1 |
| <i>circHOMER1</i> | miR-4426/4647/4662b                | 1 |
| <i>circHOMER1</i> | miR-4435                           | 1 |
| <i>circHOMER1</i> | miR-4436b-5p                       | 1 |
| <i>circHOMER1</i> | miR-4438                           | 1 |
| <i>circHOMER1</i> | miR-4446-3p                        | 1 |
| <i>circHOMER1</i> | miR-4446-5p                        | 1 |
| <i>circHOMER1</i> | miR-4450                           | 1 |
| <i>circHOMER1</i> | miR-4457                           | 3 |
| <i>circHOMER1</i> | miR-4470                           | 1 |
| <i>circHOMER1</i> | miR-4476/6876-5p                   | 3 |
| <i>circHOMER1</i> | miR-4480                           | 3 |
| <i>circHOMER1</i> | miR-4482-3p                        | 2 |
| <i>circHOMER1</i> | miR-4489                           | 1 |
| <i>circHOMER1</i> | miR-4495                           | 1 |
| <i>circHOMER1</i> | miR-4496                           | 3 |
| <i>circHOMER1</i> | miR-4501                           | 2 |
| <i>circHOMER1</i> | miR-4502                           | 1 |
| <i>circHOMER1</i> | miR-4504                           | 1 |
| <i>circHOMER1</i> | miR-450a-1-3p                      | 2 |
| <i>circHOMER1</i> | miR-450a-2-3p                      | 1 |
| <i>circHOMER1</i> | miR-450b-3p/769-3p                 | 1 |
| <i>circHOMER1</i> | miR-450b-5p                        | 1 |
| <i>circHOMER1</i> | miR-4511                           | 5 |
| <i>circHOMER1</i> | miR-4513/6855-3p                   | 2 |
| <i>circHOMER1</i> | miR-4514/4692                      | 1 |
| <i>circHOMER1</i> | miR-452-3p                         | 1 |
| <i>circHOMER1</i> | miR-4524a-3p                       | 2 |
| <i>circHOMER1</i> | miR-4524b-3p                       | 2 |
| <i>circHOMER1</i> | miR-4528                           | 1 |
| <i>circHOMER1</i> | miR-4530                           | 1 |
| <i>circHOMER1</i> | miR-4534/8082                      | 1 |
| <i>circHOMER1</i> | miR-4539                           | 4 |
| <i>circHOMER1</i> | miR-454-5p                         | 1 |
| <i>circHOMER1</i> | miR-455-3p.2                       | 3 |
| <i>circHOMER1</i> | miR-4635                           | 2 |

|                   |                       |   |
|-------------------|-----------------------|---|
| <i>circHOMER1</i> | miR-4639-3p           | 1 |
| <i>circHOMER1</i> | miR-4656              | 2 |
| <i>circHOMER1</i> | miR-4658/6790-5p      | 1 |
| <i>circHOMER1</i> | miR-4659a-5p/4659b-5p | 1 |
| <i>circHOMER1</i> | miR-4661-5p           | 1 |
| <i>circHOMER1</i> | miR-4662-5p           | 2 |
| <i>circHOMER1</i> | miR-4666a-3p          | 2 |
| <i>circHOMER1</i> | miR-4668-3p           | 1 |
| <i>circHOMER1</i> | miR-4670-3p           | 1 |
| <i>circHOMER1</i> | miR-4674              | 1 |
| <i>circHOMER1</i> | miR-4675/4741         | 2 |
| <i>circHOMER1</i> | miR-4677-5p           | 1 |
| <i>circHOMER1</i> | miR-4680-5p           | 1 |
| <i>circHOMER1</i> | miR-4681              | 1 |
| <i>circHOMER1</i> | miR-4684-5p           | 1 |
| <i>circHOMER1</i> | miR-4687-5p           | 1 |
| <i>circHOMER1</i> | miR-4690-3p/5685      | 1 |
| <i>circHOMER1</i> | miR-4693-5p           | 2 |
| <i>circHOMER1</i> | miR-4696              | 1 |
| <i>circHOMER1</i> | miR-4698              | 1 |
| <i>circHOMER1</i> | miR-4699-3p           | 1 |
| <i>circHOMER1</i> | miR-4699-5p           | 1 |
| <i>circHOMER1</i> | miR-4705              | 1 |
| <i>circHOMER1</i> | miR-4706/4749-5p      | 1 |
| <i>circHOMER1</i> | miR-4709-3p           | 1 |
| <i>circHOMER1</i> | miR-4711-3p           | 2 |
| <i>circHOMER1</i> | miR-4711-5p           | 1 |
| <i>circHOMER1</i> | miR-4713-3p           | 1 |
| <i>circHOMER1</i> | miR-4714-3p           | 1 |
| <i>circHOMER1</i> | miR-4716-5p           | 1 |
| <i>circHOMER1</i> | miR-4719              | 1 |
| <i>circHOMER1</i> | miR-4724-3p           | 1 |
| <i>circHOMER1</i> | miR-4724-5p           | 6 |
| <i>circHOMER1</i> | miR-4729              | 2 |
| <i>circHOMER1</i> | miR-4731-3p/4801      | 1 |
| <i>circHOMER1</i> | miR-4733-3p           | 1 |
| <i>circHOMER1</i> | miR-4738-3p           | 4 |
| <i>circHOMER1</i> | miR-4742-5p           | 1 |

|                   |                             |   |
|-------------------|-----------------------------|---|
| <i>circHOMER1</i> | miR-4755-5p/5006-3p         | 1 |
| <i>circHOMER1</i> | miR-4756-3p                 | 1 |
| <i>circHOMER1</i> | miR-4766-3p                 | 2 |
| <i>circHOMER1</i> | miR-4766-5p                 | 2 |
| <i>circHOMER1</i> | miR-4768-5p/6833-3p         | 1 |
| <i>circHOMER1</i> | miR-4769-3p/6817-5p         | 1 |
| <i>circHOMER1</i> | miR-4773                    | 2 |
| <i>circHOMER1</i> | miR-4775                    | 3 |
| <i>circHOMER1</i> | miR-4776-3p                 | 1 |
| <i>circHOMER1</i> | miR-4781-5p                 | 1 |
| <i>circHOMER1</i> | miR-4793-3p                 | 1 |
| <i>circHOMER1</i> | miR-4797-5p                 | 1 |
| <i>circHOMER1</i> | miR-4798-3p                 | 1 |
| <i>circHOMER1</i> | miR-485-5p                  | 1 |
| <i>circHOMER1</i> | miR-488-3p                  | 1 |
| <i>circHOMER1</i> | miR-489-3p                  | 1 |
| <i>circHOMER1</i> | miR-494-3p                  | 2 |
| <i>circHOMER1</i> | miR-495-5p                  | 1 |
| <i>circHOMER1</i> | miR-499a-5p                 | 2 |
| <i>circHOMER1</i> | miR-5000-5p                 | 1 |
| <i>circHOMER1</i> | miR-5002-5p                 | 1 |
| <i>circHOMER1</i> | miR-5006-5p                 | 1 |
| <i>circHOMER1</i> | miR-5011-5p                 | 1 |
| <i>circHOMER1</i> | miR-506-5p                  | 1 |
| <i>circHOMER1</i> | miR-507/557                 | 1 |
| <i>circHOMER1</i> | miR-5088-5p                 | 1 |
| <i>circHOMER1</i> | miR-5089-5p                 | 1 |
| <i>circHOMER1</i> | miR-509-3-5p/509-5p/4418    | 1 |
| <i>circHOMER1</i> | miR-509-3p                  | 1 |
| <i>circHOMER1</i> | miR-5093                    | 2 |
| <i>circHOMER1</i> | miR-5094                    | 1 |
| <i>circHOMER1</i> | miR-5096                    | 1 |
| <i>circHOMER1</i> | miR-510-3p                  | 1 |
| <i>circHOMER1</i> | miR-511-3p                  | 3 |
| <i>circHOMER1</i> | miR-511-5p                  | 3 |
| <i>circHOMER1</i> | miR-512-5p                  | 3 |
| <i>circHOMER1</i> | miR-513a-3p/513c-3p/3606-3p | 1 |
| <i>circHOMER1</i> | miR-513a-5p                 | 1 |

|                   |                                                                  |   |
|-------------------|------------------------------------------------------------------|---|
| <i>circHOMER1</i> | miR-513b-5p                                                      | 1 |
| <i>circHOMER1</i> | miR-513c-5p/514b-5p                                              | 1 |
| <i>circHOMER1</i> | miR-5190                                                         | 1 |
| <i>circHOMER1</i> | miR-5197-3p                                                      | 2 |
| <i>circHOMER1</i> | miR-541-5p                                                       | 2 |
| <i>circHOMER1</i> | miR-542-3p                                                       | 1 |
| <i>circHOMER1</i> | miR-543                                                          | 1 |
| <i>circHOMER1</i> | miR-548at-5p                                                     | 2 |
| <i>circHOMER1</i> | miR-548av-3p                                                     | 2 |
| <i>circHOMER1</i> | miR-548av-5p/548k/8054                                           | 1 |
| <i>circHOMER1</i> | miR-548ay-5p/548au-5p/548as-5p/548ar-5p/548aq-5p/548ap-5p/548am- | 1 |
| <i>circHOMER1</i> | miR-548az-5p/548t-5p                                             | 1 |
| <i>circHOMER1</i> | miR-548b-3p                                                      | 5 |
| <i>circHOMER1</i> | miR-548c-3p                                                      | 1 |
| <i>circHOMER1</i> | miR-548l                                                         | 1 |
| <i>circHOMER1</i> | miR-548m                                                         | 1 |
| <i>circHOMER1</i> | miR-548n                                                         | 1 |
| <i>circHOMER1</i> | miR-548p                                                         | 4 |
| <i>circHOMER1</i> | miR-548s                                                         | 1 |
| <i>circHOMER1</i> | miR-551b-5p                                                      | 3 |
| <i>circHOMER1</i> | miR-552-5p                                                       | 1 |
| <i>circHOMER1</i> | miR-5571-3p                                                      | 1 |
| <i>circHOMER1</i> | miR-5572                                                         | 1 |
| <i>circHOMER1</i> | miR-5590-5p                                                      | 1 |
| <i>circHOMER1</i> | miR-5591-3p                                                      | 1 |
| <i>circHOMER1</i> | miR-561-3p                                                       | 2 |
| <i>circHOMER1</i> | miR-568                                                          | 1 |
| <i>circHOMER1</i> | miR-5680                                                         | 2 |
| <i>circHOMER1</i> | miR-5681a                                                        | 2 |
| <i>circHOMER1</i> | miR-5683                                                         | 1 |
| <i>circHOMER1</i> | miR-5684                                                         | 1 |
| <i>circHOMER1</i> | miR-569                                                          | 1 |
| <i>circHOMER1</i> | miR-5692a                                                        | 1 |
| <i>circHOMER1</i> | miR-5692bc                                                       | 1 |
| <i>circHOMER1</i> | miR-5693                                                         | 1 |
| <i>circHOMER1</i> | miR-5696                                                         | 1 |
| <i>circHOMER1</i> | miR-5700                                                         | 3 |
| <i>circHOMER1</i> | miR-574-5p                                                       | 1 |

|                   |                  |   |
|-------------------|------------------|---|
| <i>circHOMER1</i> | miR-579-3p       | 1 |
| <i>circHOMER1</i> | miR-580-5p       | 1 |
| <i>circHOMER1</i> | miR-582-5p       | 1 |
| <i>circHOMER1</i> | miR-586          | 1 |
| <i>circHOMER1</i> | miR-588          | 1 |
| <i>circHOMER1</i> | miR-589-3p       | 2 |
| <i>circHOMER1</i> | miR-589-5p       | 1 |
| <i>circHOMER1</i> | miR-590-3p       | 2 |
| <i>circHOMER1</i> | miR-606          | 2 |
| <i>circHOMER1</i> | miR-6077         | 4 |
| <i>circHOMER1</i> | miR-6079         | 2 |
| <i>circHOMER1</i> | miR-6083         | 2 |
| <i>circHOMER1</i> | miR-6124         | 1 |
| <i>circHOMER1</i> | miR-6126         | 2 |
| <i>circHOMER1</i> | miR-6128         | 2 |
| <i>circHOMER1</i> | miR-616-3p       | 1 |
| <i>circHOMER1</i> | miR-618          | 1 |
| <i>circHOMER1</i> | miR-622          | 1 |
| <i>circHOMER1</i> | miR-623          | 1 |
| <i>circHOMER1</i> | miR-624-5p       | 1 |
| <i>circHOMER1</i> | miR-627-3p       | 1 |
| <i>circHOMER1</i> | miR-629-3p       | 1 |
| <i>circHOMER1</i> | miR-634          | 1 |
| <i>circHOMER1</i> | miR-638          | 1 |
| <i>circHOMER1</i> | miR-641/3617-5p  | 2 |
| <i>circHOMER1</i> | miR-642-3p       | 1 |
| <i>circHOMER1</i> | miR-6501-3p      | 1 |
| <i>circHOMER1</i> | miR-6507-5p      | 1 |
| <i>circHOMER1</i> | miR-6509-3p      | 1 |
| <i>circHOMER1</i> | miR-6509-5p      | 1 |
| <i>circHOMER1</i> | miR-651-3p       | 5 |
| <i>circHOMER1</i> | miR-6513-5p      | 2 |
| <i>circHOMER1</i> | miR-6516-3p      | 1 |
| <i>circHOMER1</i> | miR-6516-5p      | 1 |
| <i>circHOMER1</i> | miR-653-3p       | 1 |
| <i>circHOMER1</i> | miR-653-5p       | 3 |
| <i>circHOMER1</i> | miR-654-3p       | 1 |
| <i>circHOMER1</i> | miR-664a-5p/4794 | 1 |



|                   |                     |   |
|-------------------|---------------------|---|
| <i>circHOMER1</i> | miR-664b-5p         | 1 |
| <i>circHOMER1</i> | miR-665             | 1 |
| <i>circHOMER1</i> | miR-671-5p          | 1 |
| <i>circHOMER1</i> | miR-6716-5p         | 1 |
| <i>circHOMER1</i> | miR-6728-5p         | 1 |
| <i>circHOMER1</i> | miR-6730-5p         | 2 |
| <i>circHOMER1</i> | miR-6731-3p         | 2 |
| <i>circHOMER1</i> | miR-6740-3p         | 1 |
| <i>circHOMER1</i> | miR-6740-5p         | 1 |
| <i>circHOMER1</i> | miR-6750-3p         | 3 |
| <i>circHOMER1</i> | miR-6752-3p         | 1 |
| <i>circHOMER1</i> | miR-6757-3p         | 2 |
| <i>circHOMER1</i> | miR-6757-5p         | 2 |
| <i>circHOMER1</i> | miR-6758-3p         | 1 |
| <i>circHOMER1</i> | miR-676-5p          | 2 |
| <i>circHOMER1</i> | miR-6765-3p         | 1 |
| <i>circHOMER1</i> | miR-6768-5p         | 1 |
| <i>circHOMER1</i> | miR-6770-5p         | 1 |
| <i>circHOMER1</i> | miR-6773-3p         | 1 |
| <i>circHOMER1</i> | miR-6776-5p         | 1 |
| <i>circHOMER1</i> | miR-6777-5p/6889-5p | 1 |
| <i>circHOMER1</i> | miR-6779-3p         | 1 |
| <i>circHOMER1</i> | miR-6780a-3p        | 1 |
| <i>circHOMER1</i> | miR-6782-3p         | 1 |
| <i>circHOMER1</i> | miR-6793-3p         | 1 |
| <i>circHOMER1</i> | miR-6794-3p         | 1 |
| <i>circHOMER1</i> | miR-6799-5p         | 1 |
| <i>circHOMER1</i> | miR-6800-5p         | 1 |
| <i>circHOMER1</i> | miR-6802-3p         | 1 |
| <i>circHOMER1</i> | miR-6802-5p         | 1 |
| <i>circHOMER1</i> | miR-6808-3p         | 1 |
| <i>circHOMER1</i> | miR-6809-3p         | 1 |
| <i>circHOMER1</i> | miR-6813-3p         | 1 |
| <i>circHOMER1</i> | miR-6828-5p         | 1 |
| <i>circHOMER1</i> | miR-6829-5p         | 2 |
| <i>circHOMER1</i> | miR-6831-3p         | 1 |
| <i>circHOMER1</i> | miR-6832-3p         | 1 |
| <i>circHOMER1</i> | miR-6837-3p         | 1 |

|                   |                           |   |
|-------------------|---------------------------|---|
| <i>circHOMER1</i> | miR-6844                  | 2 |
| <i>circHOMER1</i> | miR-6847-3p               | 1 |
| <i>circHOMER1</i> | miR-6847-5p               | 1 |
| <i>circHOMER1</i> | miR-6854-5p               | 1 |
| <i>circHOMER1</i> | miR-6857-3p               | 2 |
| <i>circHOMER1</i> | miR-6861-5p               | 1 |
| <i>circHOMER1</i> | miR-6864-5p               | 2 |
| <i>circHOMER1</i> | miR-6873-5p               | 1 |
| <i>circHOMER1</i> | miR-6881-3p               | 1 |
| <i>circHOMER1</i> | miR-6882-3p               | 1 |
| <i>circHOMER1</i> | miR-6884-3p               | 1 |
| <i>circHOMER1</i> | miR-6886-5p               | 1 |
| <i>circHOMER1</i> | miR-6890-3p               | 2 |
| <i>circHOMER1</i> | miR-7-3p                  | 1 |
| <i>circHOMER1</i> | miR-7-5p                  | 4 |
| <i>circHOMER1</i> | miR-7106-5p               | 1 |
| <i>circHOMER1</i> | miR-7111-3p               | 1 |
| <i>circHOMER1</i> | miR-7112-3p               | 1 |
| <i>circHOMER1</i> | miR-7112-5p               | 1 |
| <i>circHOMER1</i> | miR-7156-3p               | 1 |
| <i>circHOMER1</i> | miR-7158-3p               | 3 |
| <i>circHOMER1</i> | miR-7159-3p               | 2 |
| <i>circHOMER1</i> | miR-744-5p                | 1 |
| <i>circHOMER1</i> | miR-762/4492/4498/5001-5p | 2 |
| <i>circHOMER1</i> | miR-767-3p                | 1 |
| <i>circHOMER1</i> | miR-7844-5p               | 1 |
| <i>circHOMER1</i> | miR-7848-3p               | 1 |
| <i>circHOMER1</i> | miR-7856-5p               | 2 |
| <i>circHOMER1</i> | miR-7975                  | 1 |
| <i>circHOMER1</i> | miR-7976                  | 1 |
| <i>circHOMER1</i> | miR-8063                  | 1 |
| <i>circHOMER1</i> | miR-8066                  | 4 |
| <i>circHOMER1</i> | miR-8075                  | 1 |
| <i>circHOMER1</i> | miR-8081                  | 1 |
| <i>circHOMER1</i> | miR-873-5p.1              | 1 |
| <i>circHOMER1</i> | miR-875-3p                | 2 |
| <i>circHOMER1</i> | miR-887-5p                | 2 |
| <i>circHOMER1</i> | miR-889-3p                | 1 |

|                   |                                       |   |
|-------------------|---------------------------------------|---|
| <i>circHOMER1</i> | miR-891b                              | 1 |
| <i>circHOMER1</i> | miR-892-5p                            | 1 |
| <i>circHOMER1</i> | miR-892a                              | 1 |
| <i>circHOMER1</i> | miR-892b                              | 1 |
| <i>circHOMER1</i> | miR-93-3p                             | 1 |
| <i>circHOMER1</i> | miR-942-5p                            | 1 |
| <i>circHOMER1</i> | miR-943                               | 2 |
| <i>circHOMER1</i> | miR-95-3p                             | 1 |
| <i>circHOMER1</i> | miR-95-5p                             | 1 |
| <i>circHOMER1</i> | miR-1279                              | 1 |
| <i>circHOMER1</i> | miR-5580-3p                           | 1 |
| <i>circICA1</i>   | let-7a-2-3p/let-7g-3p                 | 1 |
| <i>circICA1</i>   | let-7a-3p/let-7b-3p/let-7f-1-3p/98-3p | 1 |
| <i>circICA1</i>   | let-7c-3p                             | 1 |
| <i>circICA1</i>   | let-7f-2-3p/1185-3p                   | 1 |
| <i>circICA1</i>   | miR-1-5p                              | 2 |
| <i>circICA1</i>   | miR-10-5p                             | 2 |
| <i>circICA1</i>   | miR-100-3p                            | 3 |
| <i>circICA1</i>   | miR-101-3p.1                          | 1 |
| <i>circICA1</i>   | miR-101-5p                            | 2 |
| <i>circICA1</i>   | miR-103-3p/107                        | 2 |
| <i>circICA1</i>   | miR-105-3p                            | 1 |
| <i>circICA1</i>   | miR-105-5p                            | 7 |
| <i>circICA1</i>   | miR-106a-3p                           | 4 |
| <i>circICA1</i>   | miR-1178-3p                           | 4 |
| <i>circICA1</i>   | miR-1179                              | 2 |
| <i>circICA1</i>   | miR-1180-5p                           | 1 |
| <i>circICA1</i>   | miR-1185-5p                           | 4 |
| <i>circICA1</i>   | miR-1197                              | 3 |
| <i>circICA1</i>   | miR-1199-5p/6751-3p                   | 1 |
| <i>circICA1</i>   | miR-1202/3972                         | 1 |
| <i>circICA1</i>   | miR-1207-3p                           | 1 |
| <i>circICA1</i>   | miR-1207-5p/4763-3p                   | 3 |
| <i>circICA1</i>   | miR-1224-5p                           | 1 |
| <i>circICA1</i>   | miR-1225-3p                           | 1 |
| <i>circICA1</i>   | miR-1225-5p                           | 1 |
| <i>circICA1</i>   | miR-1226-5p                           | 1 |
| <i>circICA1</i>   | miR-1228-5p                           | 1 |

|                 |                          |   |
|-----------------|--------------------------|---|
| <i>circICA1</i> | miR-1229-3p              | 6 |
| <i>circICA1</i> | miR-1229-5p              | 1 |
| <i>circICA1</i> | miR-1231                 | 2 |
| <i>circICA1</i> | miR-1233-5p/6778-5p      | 1 |
| <i>circICA1</i> | miR-1236-5p              | 2 |
| <i>circICA1</i> | miR-1237-3p              | 3 |
| <i>circICA1</i> | miR-1237-5p/4488/4697-5p | 1 |
| <i>circICA1</i> | miR-1238-3p              | 3 |
| <i>circICA1</i> | miR-1238-5p/4758-5p      | 1 |
| <i>circICA1</i> | miR-124-3p.1             | 1 |
| <i>circICA1</i> | miR-1244                 | 1 |
| <i>circICA1</i> | miR-1245a/8079           | 1 |
| <i>circICA1</i> | miR-1245b-3p             | 5 |
| <i>circICA1</i> | miR-1245b-5p             | 4 |
| <i>circICA1</i> | miR-1246                 | 7 |
| <i>circICA1</i> | miR-1248                 | 3 |
| <i>circICA1</i> | miR-125-5p               | 1 |
| <i>circICA1</i> | miR-1250-3p              | 5 |
| <i>circICA1</i> | miR-1251-3p              | 1 |
| <i>circICA1</i> | miR-1251-5p              | 2 |
| <i>circICA1</i> | miR-1252-3p              | 3 |
| <i>circICA1</i> | miR-1252-5p              | 6 |
| <i>circICA1</i> | miR-1253                 | 4 |
| <i>circICA1</i> | miR-1254/3116            | 3 |
| <i>circICA1</i> | miR-1255a/1255b-5p       | 2 |
| <i>circICA1</i> | miR-1255b-2-3p           | 4 |
| <i>circICA1</i> | miR-1256                 | 2 |
| <i>circICA1</i> | miR-125a-3p              | 1 |
| <i>circICA1</i> | miR-126-3p.2             | 1 |
| <i>circICA1</i> | miR-126-5p               | 5 |
| <i>circICA1</i> | miR-1260a/1260b          | 1 |
| <i>circICA1</i> | miR-1261                 | 1 |
| <i>circICA1</i> | miR-1264                 | 2 |
| <i>circICA1</i> | miR-1265                 | 2 |
| <i>circICA1</i> | miR-1266-5p/4518         | 4 |
| <i>circICA1</i> | miR-1267                 | 1 |
| <i>circICA1</i> | miR-1269                 | 1 |
| <i>circICA1</i> | miR-1270                 | 9 |

|                 |                          |   |
|-----------------|--------------------------|---|
| <i>circICA1</i> | miR-1272                 | 1 |
| <i>circICA1</i> | miR-1273a                | 1 |
| <i>circICA1</i> | miR-1273c                | 3 |
| <i>circICA1</i> | miR-1273e                | 1 |
| <i>circICA1</i> | miR-1273f                | 3 |
| <i>circICA1</i> | miR-1273g-3p             | 2 |
| <i>circICA1</i> | miR-1273h-3p             | 2 |
| <i>circICA1</i> | miR-1275/4665-5p         | 1 |
| <i>circICA1</i> | miR-1276                 | 5 |
| <i>circICA1</i> | miR-1277-5p              | 3 |
| <i>circICA1</i> | miR-128-1-5p             | 1 |
| <i>circICA1</i> | miR-128-3p               | 1 |
| <i>circICA1</i> | miR-1283                 | 4 |
| <i>circICA1</i> | miR-1285-5p              | 5 |
| <i>circICA1</i> | miR-1286                 | 7 |
| <i>circICA1</i> | miR-129-5p               | 3 |
| <i>circICA1</i> | miR-1291/6775-3p         | 3 |
| <i>circICA1</i> | miR-1296-3p              | 1 |
| <i>circICA1</i> | miR-1296-5p              | 1 |
| <i>circICA1</i> | miR-1298-3p              | 1 |
| <i>circICA1</i> | miR-1298-5p              | 2 |
| <i>circICA1</i> | miR-1299                 | 3 |
| <i>circICA1</i> | miR-130-3p/301-3p/454-3p | 3 |
| <i>circICA1</i> | miR-1301-3p              | 1 |
| <i>circICA1</i> | miR-1301-5p/6502-5p      | 1 |
| <i>circICA1</i> | miR-1302/4298            | 3 |
| <i>circICA1</i> | miR-1303                 | 1 |
| <i>circICA1</i> | miR-1304-3p              | 1 |
| <i>circICA1</i> | miR-1305                 | 3 |
| <i>circICA1</i> | miR-1306-3p              | 2 |
| <i>circICA1</i> | miR-132-3p/212-3p        | 4 |
| <i>circICA1</i> | miR-1322                 | 1 |
| <i>circICA1</i> | miR-1323                 | 1 |
| <i>circICA1</i> | miR-1324                 | 1 |
| <i>circICA1</i> | miR-133a-3p.1            | 2 |
| <i>circICA1</i> | miR-133a-3p.2/133b       | 1 |
| <i>circICA1</i> | miR-1343-3p              | 1 |
| <i>circICA1</i> | miR-136-5p               | 3 |

|                 |                                      |   |
|-----------------|--------------------------------------|---|
| <i>circICA1</i> | miR-138-2-3p                         | 1 |
| <i>circICA1</i> | miR-139-3p                           | 3 |
| <i>circICA1</i> | miR-139-5p                           | 3 |
| <i>circICA1</i> | miR-140-3p.1                         | 3 |
| <i>circICA1</i> | miR-141-3p/200-3p                    | 1 |
| <i>circICA1</i> | miR-141-5p                           | 1 |
| <i>circICA1</i> | miR-142-5p                           | 1 |
| <i>circICA1</i> | miR-143-3p                           | 3 |
| <i>circICA1</i> | miR-143-5p                           | 1 |
| <i>circICA1</i> | miR-144-3p                           | 1 |
| <i>circICA1</i> | miR-145-3p                           | 3 |
| <i>circICA1</i> | miR-145-5p                           | 1 |
| <i>circICA1</i> | miR-146-5p                           | 3 |
| <i>circICA1</i> | miR-1468-3p                          | 2 |
| <i>circICA1</i> | miR-146b-3p                          | 1 |
| <i>circICA1</i> | miR-147a                             | 1 |
| <i>circICA1</i> | miR-148-3p/152-3p                    | 4 |
| <i>circICA1</i> | miR-148a-5p                          | 4 |
| <i>circICA1</i> | miR-148b-5p/6874-3p                  | 3 |
| <i>circICA1</i> | miR-149-3p/4728-5p/6785-5p/6883-5p   | 2 |
| <i>circICA1</i> | miR-149-5p                           | 1 |
| <i>circICA1</i> | miR-15-5p/16-5p/195-5p/424-5p/497-5p | 1 |
| <i>circICA1</i> | miR-153-5p                           | 4 |
| <i>circICA1</i> | miR-154-5p                           | 4 |
| <i>circICA1</i> | miR-15a-3p                           | 5 |
| <i>circICA1</i> | miR-15b-3p                           | 2 |
| <i>circICA1</i> | miR-16-1-3p                          | 1 |
| <i>circICA1</i> | miR-16-2-3p/195-3p                   | 1 |
| <i>circICA1</i> | miR-17-5p/20-5p/93-5p/106-5p/519-3p  | 3 |
| <i>circICA1</i> | miR-18-5p                            | 3 |
| <i>circICA1</i> | miR-181-5p                           | 1 |
| <i>circICA1</i> | miR-182-5p                           | 1 |
| <i>circICA1</i> | miR-1825                             | 4 |
| <i>circICA1</i> | miR-1827                             | 3 |
| <i>circICA1</i> | miR-183-3p                           | 5 |
| <i>circICA1</i> | miR-183-5p.1                         | 4 |
| <i>circICA1</i> | miR-183-5p.2                         | 1 |
| <i>circICA1</i> | miR-184                              | 2 |

|                 |                      |   |
|-----------------|----------------------|---|
| <i>circICA1</i> | miR-185-3p           | 3 |
| <i>circICA1</i> | miR-185-5p           | 4 |
| <i>circICA1</i> | miR-186-5p           | 3 |
| <i>circICA1</i> | miR-187-3p           | 2 |
| <i>circICA1</i> | miR-188-3p           | 1 |
| <i>circICA1</i> | miR-188-5p           | 3 |
| <i>circICA1</i> | miR-18a-3p           | 2 |
| <i>circICA1</i> | miR-18b-3p           | 1 |
| <i>circICA1</i> | miR-19-5p            | 2 |
| <i>circICA1</i> | miR-190-5p           | 4 |
| <i>circICA1</i> | miR-1909-3p/6722-3p  | 1 |
| <i>circICA1</i> | miR-190a-3p          | 1 |
| <i>circICA1</i> | miR-1910-3p/6511a-5p | 3 |
| <i>circICA1</i> | miR-1910-5p          | 1 |
| <i>circICA1</i> | miR-1911-3p          | 1 |
| <i>circICA1</i> | miR-1915-3p/6764-5p  | 2 |
| <i>circICA1</i> | miR-1915-5p          | 2 |
| <i>circICA1</i> | miR-192-3p           | 3 |
| <i>circICA1</i> | miR-192-5p/215-5p    | 2 |
| <i>circICA1</i> | miR-193b-5p          | 1 |
| <i>circICA1</i> | miR-194-3p           | 3 |
| <i>circICA1</i> | miR-194-5p           | 1 |
| <i>circICA1</i> | miR-196a-3p          | 1 |
| <i>circICA1</i> | miR-196b-3p          | 1 |
| <i>circICA1</i> | miR-197-3p           | 3 |
| <i>circICA1</i> | miR-1972             | 4 |
| <i>circICA1</i> | miR-1973             | 2 |
| <i>circICA1</i> | miR-198              | 1 |
| <i>circICA1</i> | miR-199-3p           | 1 |
| <i>circICA1</i> | miR-199-5p           | 4 |
| <i>circICA1</i> | miR-200-3p/429       | 1 |
| <i>circICA1</i> | miR-202-3p           | 1 |
| <i>circICA1</i> | miR-203a-3p.1        | 3 |
| <i>circICA1</i> | miR-203b-3p          | 2 |
| <i>circICA1</i> | miR-203b-5p/6718-5p  | 2 |
| <i>circICA1</i> | miR-204-3p/4646-5p   | 8 |
| <i>circICA1</i> | miR-204-5p/211-5p    | 1 |
| <i>circICA1</i> | miR-205-3p           | 5 |

|                 |                    |   |
|-----------------|--------------------|---|
| <i>circICA1</i> | miR-2052           | 2 |
| <i>circICA1</i> | miR-2054           | 1 |
| <i>circICA1</i> | miR-208-3p         | 2 |
| <i>circICA1</i> | miR-208-5p         | 3 |
| <i>circICA1</i> | miR-20a-3p         | 2 |
| <i>circICA1</i> | miR-21-5p/590-5p   | 2 |
| <i>circICA1</i> | miR-210-5p         | 1 |
| <i>circICA1</i> | miR-211-3p         | 1 |
| <i>circICA1</i> | miR-2110           | 2 |
| <i>circICA1</i> | miR-2113           | 4 |
| <i>circICA1</i> | miR-2114-5p        | 2 |
| <i>circICA1</i> | miR-2115-3p        | 1 |
| <i>circICA1</i> | miR-2115-5p        | 1 |
| <i>circICA1</i> | miR-212-5p         | 3 |
| <i>circICA1</i> | miR-214-3p/3619-5p | 2 |
| <i>circICA1</i> | miR-216a-5p        | 2 |
| <i>circICA1</i> | miR-216b-3p        | 1 |
| <i>circICA1</i> | miR-216b-5p        | 2 |
| <i>circICA1</i> | miR-217            | 4 |
| <i>circICA1</i> | miR-218-5p         | 2 |
| <i>circICA1</i> | miR-219-5p         | 1 |
| <i>circICA1</i> | miR-219a-1-3p      | 1 |
| <i>circICA1</i> | miR-219a-2-3p      | 2 |
| <i>circICA1</i> | miR-219b-3p        | 2 |
| <i>circICA1</i> | miR-221-3p/222-3p  | 3 |
| <i>circICA1</i> | miR-223-3p         | 3 |
| <i>circICA1</i> | miR-224-5p         | 3 |
| <i>circICA1</i> | miR-2276-3p        | 1 |
| <i>circICA1</i> | miR-2276-5p        | 2 |
| <i>circICA1</i> | miR-2277-3p        | 1 |
| <i>circICA1</i> | miR-2278           | 4 |
| <i>circICA1</i> | miR-23-3p          | 3 |
| <i>circICA1</i> | miR-23-5p          | 1 |
| <i>circICA1</i> | miR-2355-5p        | 1 |
| <i>circICA1</i> | miR-2392           | 7 |
| <i>circICA1</i> | miR-24-3p          | 2 |
| <i>circICA1</i> | miR-2467-3p        | 2 |
| <i>circICA1</i> | miR-2467-5p        | 1 |



|                 |                                              |    |
|-----------------|----------------------------------------------|----|
| <i>circICA1</i> | miR-25-3p/32-5p/92-3p/363-3p/367-3p          | 2  |
| <i>circICA1</i> | miR-2681-3p                                  | 1  |
| <i>circICA1</i> | miR-2681-5p                                  | 1  |
| <i>circICA1</i> | miR-2682-3p/6781-3p                          | 3  |
| <i>circICA1</i> | miR-27-3p                                    | 1  |
| <i>circICA1</i> | miR-27b-5p                                   | 3  |
| <i>circICA1</i> | miR-28-3p                                    | 2  |
| <i>circICA1</i> | miR-28-5p/708-5p                             | 6  |
| <i>circICA1</i> | miR-296-5p                                   | 1  |
| <i>circICA1</i> | miR-298                                      | 1  |
| <i>circICA1</i> | miR-299-5p                                   | 1  |
| <i>circICA1</i> | miR-29a-5p                                   | 1  |
| <i>circICA1</i> | miR-30-5p                                    | 1  |
| <i>circICA1</i> | miR-301a-5p/301b-5p                          | 4  |
| <i>circICA1</i> | miR-302-3p/372-3p/373-3p/520-3p              | 2  |
| <i>circICA1</i> | miR-302a-5p                                  | 2  |
| <i>circICA1</i> | miR-302b-5p/302d-5p                          | 5  |
| <i>circICA1</i> | miR-3064-3p                                  | 1  |
| <i>circICA1</i> | miR-3065-5p                                  | 3  |
| <i>circICA1</i> | miR-3074-3p                                  | 1  |
| <i>circICA1</i> | miR-3074-5p                                  | 3  |
| <i>circICA1</i> | miR-30b-3p/1273h-5p/3689-3p/6779-5p/6780a-5p | 10 |
| <i>circICA1</i> | miR-30c-3p/6788-5p                           | 10 |
| <i>circICA1</i> | miR-3117-3p                                  | 1  |
| <i>circICA1</i> | miR-3120-3p                                  | 1  |
| <i>circICA1</i> | miR-3120-5p                                  | 3  |
| <i>circICA1</i> | miR-3121-3p                                  | 2  |
| <i>circICA1</i> | miR-3121-5p                                  | 5  |
| <i>circICA1</i> | miR-3122/3913-5p                             | 6  |
| <i>circICA1</i> | miR-3123                                     | 5  |
| <i>circICA1</i> | miR-3124-3p                                  | 3  |
| <i>circICA1</i> | miR-3125/3916/6859-5p                        | 5  |
| <i>circICA1</i> | miR-3126-3p                                  | 1  |
| <i>circICA1</i> | miR-3126-5p                                  | 2  |
| <i>circICA1</i> | miR-3127-3p/6756-3p                          | 1  |
| <i>circICA1</i> | miR-3129-3p/5583-5p                          | 1  |
| <i>circICA1</i> | miR-3130-3p                                  | 1  |
| <i>circICA1</i> | miR-3133                                     | 3  |

|                 |                           |    |
|-----------------|---------------------------|----|
| <i>circICA1</i> | miR-3134                  | 7  |
| <i>circICA1</i> | miR-3135a                 | 1  |
| <i>circICA1</i> | miR-3136-3p/7155-3p       | 1  |
| <i>circICA1</i> | miR-3140-3p               | 3  |
| <i>circICA1</i> | miR-3140-5p               | 1  |
| <i>circICA1</i> | miR-3141                  | 1  |
| <i>circICA1</i> | miR-3143                  | 1  |
| <i>circICA1</i> | miR-3144-3p               | 1  |
| <i>circICA1</i> | miR-3144-5p               | 1  |
| <i>circICA1</i> | miR-3145-3p               | 2  |
| <i>circICA1</i> | miR-3145-5p               | 2  |
| <i>circICA1</i> | miR-3146                  | 4  |
| <i>circICA1</i> | miR-3148                  | 3  |
| <i>circICA1</i> | miR-3150a-3p              | 2  |
| <i>circICA1</i> | miR-3150b-3p              | 3  |
| <i>circICA1</i> | miR-3152-5p               | 5  |
| <i>circICA1</i> | miR-3153/6733-5p/6739-5p  | 4  |
| <i>circICA1</i> | miR-3154                  | 5  |
| <i>circICA1</i> | miR-3156-3p               | 1  |
| <i>circICA1</i> | miR-3157-3p               | 1  |
| <i>circICA1</i> | miR-3157-5p               | 1  |
| <i>circICA1</i> | miR-3159                  | 1  |
| <i>circICA1</i> | miR-3162-3p               | 1  |
| <i>circICA1</i> | miR-3163                  | 3  |
| <i>circICA1</i> | miR-3166                  | 1  |
| <i>circICA1</i> | miR-3168                  | 3  |
| <i>circICA1</i> | miR-3169                  | 2  |
| <i>circICA1</i> | miR-3173-3p/6891-5p       | 1  |
| <i>circICA1</i> | miR-3173-5p               | 1  |
| <i>circICA1</i> | miR-3174                  | 2  |
| <i>circICA1</i> | miR-3175                  | 1  |
| <i>circICA1</i> | miR-3178                  | 1  |
| <i>circICA1</i> | miR-3180-5p               | 2  |
| <i>circICA1</i> | miR-3181                  | 4  |
| <i>circICA1</i> | miR-3182                  | 1  |
| <i>circICA1</i> | miR-3183/4723-3p/6769b-3p | 2  |
| <i>circICA1</i> | miR-3184-3p               | 2  |
| <i>circICA1</i> | miR-3185                  | 16 |

|                 |                           |   |
|-----------------|---------------------------|---|
| <i>circICA1</i> | miR-3187-3p               | 2 |
| <i>circICA1</i> | miR-3188                  | 1 |
| <i>circICA1</i> | miR-3189-3p               | 3 |
| <i>circICA1</i> | miR-3189-5p               | 1 |
| <i>circICA1</i> | miR-3191-3p               | 1 |
| <i>circICA1</i> | miR-3191-5p               | 2 |
| <i>circICA1</i> | miR-3192-5p               | 8 |
| <i>circICA1</i> | miR-3193                  | 2 |
| <i>circICA1</i> | miR-3194-5p               | 1 |
| <i>circICA1</i> | miR-3199/8052             | 2 |
| <i>circICA1</i> | miR-320                   | 2 |
| <i>circICA1</i> | miR-3200-3p               | 3 |
| <i>circICA1</i> | miR-3200-5p               | 1 |
| <i>circICA1</i> | miR-3201/4791             | 1 |
| <i>circICA1</i> | miR-3202                  | 1 |
| <i>circICA1</i> | miR-320e                  | 1 |
| <i>circICA1</i> | miR-323-3p                | 1 |
| <i>circICA1</i> | miR-323a-5p               | 1 |
| <i>circICA1</i> | miR-324-3p/1913           | 2 |
| <i>circICA1</i> | miR-326                   | 1 |
| <i>circICA1</i> | miR-328-3p                | 2 |
| <i>circICA1</i> | miR-329-5p                | 2 |
| <i>circICA1</i> | miR-33-5p                 | 1 |
| <i>circICA1</i> | miR-330-3p                | 2 |
| <i>circICA1</i> | miR-330-3p.2              | 4 |
| <i>circICA1</i> | miR-335-3p                | 1 |
| <i>circICA1</i> | miR-338-3p                | 4 |
| <i>circICA1</i> | miR-338-5p                | 1 |
| <i>circICA1</i> | miR-33a-3p                | 2 |
| <i>circICA1</i> | miR-33b-3p/515-3p/519e-3p | 1 |
| <i>circICA1</i> | miR-34-5p/449-5p          | 1 |
| <i>circICA1</i> | miR-342-3p                | 6 |
| <i>circICA1</i> | miR-345-3p                | 1 |
| <i>circICA1</i> | miR-345-5p                | 5 |
| <i>circICA1</i> | miR-34a-3p                | 1 |
| <i>circICA1</i> | miR-34b-3p                | 1 |
| <i>circICA1</i> | miR-34b-5p/449c-5p        | 3 |
| <i>circICA1</i> | miR-34c-3p                | 1 |

|                 |                     |   |
|-----------------|---------------------|---|
| <i>circICA1</i> | miR-3605-5p         | 4 |
| <i>circICA1</i> | miR-3606-5p         | 1 |
| <i>circICA1</i> | miR-3607-3p         | 3 |
| <i>circICA1</i> | miR-3607-5p         | 1 |
| <i>circICA1</i> | miR-361-3p          | 3 |
| <i>circICA1</i> | miR-3611            | 1 |
| <i>circICA1</i> | miR-3612            | 4 |
| <i>circICA1</i> | miR-3613-3p         | 6 |
| <i>circICA1</i> | miR-3613-5p         | 3 |
| <i>circICA1</i> | miR-3614-5p         | 2 |
| <i>circICA1</i> | miR-3616-3p         | 1 |
| <i>circICA1</i> | miR-3617-3p         | 1 |
| <i>circICA1</i> | miR-3619-3p         | 2 |
| <i>circICA1</i> | miR-362-5p/500b-5p  | 4 |
| <i>circICA1</i> | miR-3620-3p         | 4 |
| <i>circICA1</i> | miR-3646            | 3 |
| <i>circICA1</i> | miR-3649            | 3 |
| <i>circICA1</i> | miR-365-3p          | 1 |
| <i>circICA1</i> | miR-3653-3p         | 2 |
| <i>circICA1</i> | miR-3655            | 5 |
| <i>circICA1</i> | miR-3657            | 1 |
| <i>circICA1</i> | miR-3658            | 3 |
| <i>circICA1</i> | miR-3659            | 2 |
| <i>circICA1</i> | miR-365a-5p/365b-5p | 2 |
| <i>circICA1</i> | miR-3660/4526       | 1 |
| <i>circICA1</i> | miR-3662            | 3 |
| <i>circICA1</i> | miR-3663-3p         | 3 |
| <i>circICA1</i> | miR-3664-3p         | 4 |
| <i>circICA1</i> | miR-3664-5p         | 3 |
| <i>circICA1</i> | miR-3667-3p         | 1 |
| <i>circICA1</i> | miR-3667-5p         | 4 |
| <i>circICA1</i> | miR-3668            | 1 |
| <i>circICA1</i> | miR-367-5p          | 1 |
| <i>circICA1</i> | miR-3670            | 2 |
| <i>circICA1</i> | miR-3671            | 2 |
| <i>circICA1</i> | miR-3672/6864-3p    | 2 |
| <i>circICA1</i> | miR-3675-3p         | 4 |
| <i>circICA1</i> | miR-3677-5p         | 1 |

|                 |                           |   |
|-----------------|---------------------------|---|
| <i>circICA1</i> | miR-3678-3p               | 2 |
| <i>circICA1</i> | miR-3680-3p               | 1 |
| <i>circICA1</i> | miR-3681-5p               | 5 |
| <i>circICA1</i> | miR-3682-3p               | 1 |
| <i>circICA1</i> | miR-3682-5p               | 2 |
| <i>circICA1</i> | miR-3683                  | 3 |
| <i>circICA1</i> | miR-3684                  | 1 |
| <i>circICA1</i> | miR-3686                  | 1 |
| <i>circICA1</i> | miR-3688-3p               | 6 |
| <i>circICA1</i> | miR-3688-5p               | 1 |
| <i>circICA1</i> | miR-3689d/6851-5p         | 1 |
| <i>circICA1</i> | miR-369-3p                | 1 |
| <i>circICA1</i> | miR-3690                  | 3 |
| <i>circICA1</i> | miR-3691-3p               | 1 |
| <i>circICA1</i> | miR-3691-5p               | 2 |
| <i>circICA1</i> | miR-3692-3p               | 1 |
| <i>circICA1</i> | miR-3692-5p               | 2 |
| <i>circICA1</i> | miR-370-3p                | 2 |
| <i>circICA1</i> | miR-371-5p                | 3 |
| <i>circICA1</i> | miR-3714                  | 1 |
| <i>circICA1</i> | miR-371a-3p               | 1 |
| <i>circICA1</i> | miR-371b-3p               | 1 |
| <i>circICA1</i> | miR-371b-5p/373-5p/616-5p | 3 |
| <i>circICA1</i> | miR-372-5p                | 3 |
| <i>circICA1</i> | miR-374-5p                | 2 |
| <i>circICA1</i> | miR-374a-3p               | 3 |
| <i>circICA1</i> | miR-375                   | 2 |
| <i>circICA1</i> | miR-376b-5p/376c-5p       | 1 |
| <i>circICA1</i> | miR-377-3p                | 4 |
| <i>circICA1</i> | miR-377-5p/6086           | 2 |
| <i>circICA1</i> | miR-378-3p                | 1 |
| <i>circICA1</i> | miR-378g                  | 3 |
| <i>circICA1</i> | miR-378j/6839-5p          | 4 |
| <i>circICA1</i> | miR-380-3p                | 1 |
| <i>circICA1</i> | miR-381-3p                | 1 |
| <i>circICA1</i> | miR-382-3p                | 2 |
| <i>circICA1</i> | miR-383-5p.1              | 1 |
| <i>circICA1</i> | miR-3907                  | 3 |

|                 |                     |   |
|-----------------|---------------------|---|
| <i>circICA1</i> | miR-3908            | 2 |
| <i>circICA1</i> | miR-3909            | 1 |
| <i>circICA1</i> | miR-3910            | 1 |
| <i>circICA1</i> | miR-3915            | 1 |
| <i>circICA1</i> | miR-3919            | 3 |
| <i>circICA1</i> | miR-3921/4653-5p    | 4 |
| <i>circICA1</i> | miR-3922-5p         | 2 |
| <i>circICA1</i> | miR-3925-3p         | 2 |
| <i>circICA1</i> | miR-3925-5p         | 5 |
| <i>circICA1</i> | miR-3926            | 3 |
| <i>circICA1</i> | miR-3928-3p         | 2 |
| <i>circICA1</i> | miR-3928-5p/6806-3p | 2 |
| <i>circICA1</i> | miR-3929/4419b/4478 | 1 |
| <i>circICA1</i> | miR-3934-3p         | 2 |
| <i>circICA1</i> | miR-3934-5p         | 1 |
| <i>circICA1</i> | miR-3936            | 1 |
| <i>circICA1</i> | miR-3940-5p/4507    | 1 |
| <i>circICA1</i> | miR-3941            | 1 |
| <i>circICA1</i> | miR-3942-3p         | 3 |
| <i>circICA1</i> | miR-3942-5p         | 2 |
| <i>circICA1</i> | miR-3944-3p         | 4 |
| <i>circICA1</i> | miR-3944-5p         | 4 |
| <i>circICA1</i> | miR-3945            | 2 |
| <i>circICA1</i> | miR-3973            | 3 |
| <i>circICA1</i> | miR-3975            | 1 |
| <i>circICA1</i> | miR-3976            | 2 |
| <i>circICA1</i> | miR-3977            | 4 |
| <i>circICA1</i> | miR-3978            | 2 |
| <i>circICA1</i> | miR-409-3p          | 3 |
| <i>circICA1</i> | miR-410-3p          | 1 |
| <i>circICA1</i> | miR-411-5p.1        | 1 |
| <i>circICA1</i> | miR-411-5p.2        | 2 |
| <i>circICA1</i> | miR-421             | 1 |
| <i>circICA1</i> | miR-423-5p          | 1 |
| <i>circICA1</i> | miR-424-3p          | 2 |
| <i>circICA1</i> | miR-4251            | 1 |
| <i>circICA1</i> | miR-4252            | 1 |
| <i>circICA1</i> | miR-4253/6862-5p    | 2 |

|                 |                           |   |
|-----------------|---------------------------|---|
| <i>circICA1</i> | miR-4254                  | 3 |
| <i>circICA1</i> | miR-4256                  | 3 |
| <i>circICA1</i> | miR-4259                  | 2 |
| <i>circICA1</i> | miR-4260                  | 2 |
| <i>circICA1</i> | miR-4261                  | 1 |
| <i>circICA1</i> | miR-4263                  | 2 |
| <i>circICA1</i> | miR-4264                  | 1 |
| <i>circICA1</i> | miR-4266                  | 1 |
| <i>circICA1</i> | miR-4267                  | 2 |
| <i>circICA1</i> | miR-4268                  | 1 |
| <i>circICA1</i> | miR-4270/4441/6754-5p     | 5 |
| <i>circICA1</i> | miR-4271/4725-3p/6780b-5p | 1 |
| <i>circICA1</i> | miR-4272                  | 5 |
| <i>circICA1</i> | miR-4274                  | 2 |
| <i>circICA1</i> | miR-4280                  | 1 |
| <i>circICA1</i> | miR-4282                  | 6 |
| <i>circICA1</i> | miR-4284                  | 2 |
| <i>circICA1</i> | miR-4289                  | 1 |
| <i>circICA1</i> | miR-4290                  | 2 |
| <i>circICA1</i> | miR-4291                  | 2 |
| <i>circICA1</i> | miR-4292/6791-5p          | 5 |
| <i>circICA1</i> | miR-4293                  | 3 |
| <i>circICA1</i> | miR-4297/5581-5p          | 1 |
| <i>circICA1</i> | miR-4301                  | 1 |
| <i>circICA1</i> | miR-4303                  | 3 |
| <i>circICA1</i> | miR-4304                  | 4 |
| <i>circICA1</i> | miR-4307                  | 3 |
| <i>circICA1</i> | miR-4308                  | 5 |
| <i>circICA1</i> | miR-431-5p                | 1 |
| <i>circICA1</i> | miR-4310/7157-5p          | 2 |
| <i>circICA1</i> | miR-4311                  | 5 |
| <i>circICA1</i> | miR-4312                  | 4 |
| <i>circICA1</i> | miR-4313                  | 1 |
| <i>circICA1</i> | miR-4314                  | 1 |
| <i>circICA1</i> | miR-4317                  | 2 |
| <i>circICA1</i> | miR-4318                  | 1 |
| <i>circICA1</i> | miR-432-3p                | 7 |
| <i>circICA1</i> | miR-432-5p                | 4 |

|                 |                                    |    |
|-----------------|------------------------------------|----|
| <i>circICA1</i> | miR-4320                           | 1  |
| <i>circICA1</i> | miR-4324                           | 1  |
| <i>circICA1</i> | miR-4325                           | 1  |
| <i>circICA1</i> | miR-4326                           | 2  |
| <i>circICA1</i> | miR-4327                           | 2  |
| <i>circICA1</i> | miR-4329                           | 1  |
| <i>circICA1</i> | miR-433-5p                         | 3  |
| <i>circICA1</i> | miR-4330                           | 6  |
| <i>circICA1</i> | miR-4417                           | 1  |
| <i>circICA1</i> | miR-4419a/4510/6127/6129/6130/6133 | 2  |
| <i>circICA1</i> | miR-4421/5699-3p                   | 2  |
| <i>circICA1</i> | miR-4422                           | 4  |
| <i>circICA1</i> | miR-4423-5p                        | 3  |
| <i>circICA1</i> | miR-4424                           | 1  |
| <i>circICA1</i> | miR-4426/4647/4662b                | 12 |
| <i>circICA1</i> | miR-4427                           | 1  |
| <i>circICA1</i> | miR-4428                           | 1  |
| <i>circICA1</i> | miR-4432                           | 4  |
| <i>circICA1</i> | miR-4433a-3p                       | 7  |
| <i>circICA1</i> | miR-4433a-5p                       | 3  |
| <i>circICA1</i> | miR-4433b-3p                       | 1  |
| <i>circICA1</i> | miR-4433b-5p                       | 1  |
| <i>circICA1</i> | miR-4434/4516/5703                 | 7  |
| <i>circICA1</i> | miR-4435                           | 2  |
| <i>circICA1</i> | miR-4436b-5p                       | 1  |
| <i>circICA1</i> | miR-4438                           | 2  |
| <i>circICA1</i> | miR-4443                           | 2  |
| <i>circICA1</i> | miR-4445-5p                        | 1  |
| <i>circICA1</i> | miR-4448                           | 1  |
| <i>circICA1</i> | miR-4452                           | 5  |
| <i>circICA1</i> | miR-4453/4538                      | 3  |
| <i>circICA1</i> | miR-4457                           | 4  |
| <i>circICA1</i> | miR-4459                           | 7  |
| <i>circICA1</i> | miR-4464/4748                      | 3  |
| <i>circICA1</i> | miR-4468                           | 5  |
| <i>circICA1</i> | miR-4475                           | 2  |
| <i>circICA1</i> | miR-4476/6876-5p                   | 8  |
| <i>circICA1</i> | miR-4477a                          | 5  |



|                 |                     |   |
|-----------------|---------------------|---|
| <i>circICA1</i> | miR-4480            | 5 |
| <i>circICA1</i> | miR-4481/4745-5p    | 1 |
| <i>circICA1</i> | miR-4482-3p         | 1 |
| <i>circICA1</i> | miR-4484            | 2 |
| <i>circICA1</i> | miR-4486            | 3 |
| <i>circICA1</i> | miR-4493            | 1 |
| <i>circICA1</i> | miR-4494            | 1 |
| <i>circICA1</i> | miR-4496            | 3 |
| <i>circICA1</i> | miR-4497            | 1 |
| <i>circICA1</i> | miR-449c-3p         | 2 |
| <i>circICA1</i> | miR-4502            | 1 |
| <i>circICA1</i> | miR-4504            | 1 |
| <i>circICA1</i> | miR-4506            | 2 |
| <i>circICA1</i> | miR-4509            | 1 |
| <i>circICA1</i> | miR-450a-1-3p       | 6 |
| <i>circICA1</i> | miR-450a-2-3p       | 2 |
| <i>circICA1</i> | miR-450b-5p         | 1 |
| <i>circICA1</i> | miR-4512            | 2 |
| <i>circICA1</i> | miR-4517            | 1 |
| <i>circICA1</i> | miR-4519            | 2 |
| <i>circICA1</i> | miR-451b            | 1 |
| <i>circICA1</i> | miR-452-3p          | 1 |
| <i>circICA1</i> | miR-4521            | 1 |
| <i>circICA1</i> | miR-4524-5p         | 1 |
| <i>circICA1</i> | miR-4524b-3p        | 1 |
| <i>circICA1</i> | miR-4528            | 1 |
| <i>circICA1</i> | miR-4529-5p         | 5 |
| <i>circICA1</i> | miR-4530            | 4 |
| <i>circICA1</i> | miR-4531            | 9 |
| <i>circICA1</i> | miR-4533            | 1 |
| <i>circICA1</i> | miR-4534/8082       | 7 |
| <i>circICA1</i> | miR-4536-3p         | 2 |
| <i>circICA1</i> | miR-4537            | 2 |
| <i>circICA1</i> | miR-455-3p.1        | 1 |
| <i>circICA1</i> | miR-455-3p.2        | 1 |
| <i>circICA1</i> | miR-455-5p          | 1 |
| <i>circICA1</i> | miR-4633-3p/6500-5p | 3 |
| <i>circICA1</i> | miR-4635            | 1 |

|                 |                          |   |
|-----------------|--------------------------|---|
| <i>circICA1</i> | miR-4638-3p              | 1 |
| <i>circICA1</i> | miR-4639-3p              | 3 |
| <i>circICA1</i> | miR-4639-5p              | 3 |
| <i>circICA1</i> | miR-4640-3p              | 2 |
| <i>circICA1</i> | miR-4640-5p              | 5 |
| <i>circICA1</i> | miR-4642                 | 1 |
| <i>circICA1</i> | miR-4643                 | 1 |
| <i>circICA1</i> | miR-4645-5p/4673         | 1 |
| <i>circICA1</i> | miR-4648                 | 1 |
| <i>circICA1</i> | miR-4649-3p              | 3 |
| <i>circICA1</i> | miR-4649-5p/6729-5p      | 2 |
| <i>circICA1</i> | miR-4650-5p              | 4 |
| <i>circICA1</i> | miR-4652-3p              | 1 |
| <i>circICA1</i> | miR-4652-5p              | 1 |
| <i>circICA1</i> | miR-4653-3p              | 1 |
| <i>circICA1</i> | miR-4654/4769-5p         | 1 |
| <i>circICA1</i> | miR-4658/6790-5p         | 1 |
| <i>circICA1</i> | miR-4659a-3p/4659b-3p    | 3 |
| <i>circICA1</i> | miR-466                  | 1 |
| <i>circICA1</i> | miR-4660                 | 1 |
| <i>circICA1</i> | miR-4661-3p              | 4 |
| <i>circICA1</i> | miR-4662a-3p             | 5 |
| <i>circICA1</i> | miR-4663                 | 2 |
| <i>circICA1</i> | miR-4666a-3p             | 1 |
| <i>circICA1</i> | miR-4666a-5p             | 3 |
| <i>circICA1</i> | miR-4666b                | 2 |
| <i>circICA1</i> | miR-4667-5p/4700-5p/8089 | 1 |
| <i>circICA1</i> | miR-4668-3p              | 3 |
| <i>circICA1</i> | miR-4668-5p              | 4 |
| <i>circICA1</i> | miR-4669                 | 1 |
| <i>circICA1</i> | miR-4670-3p              | 3 |
| <i>circICA1</i> | miR-4670-5p              | 2 |
| <i>circICA1</i> | miR-4672                 | 1 |
| <i>circICA1</i> | miR-4678                 | 1 |
| <i>circICA1</i> | miR-4680-3p              | 1 |
| <i>circICA1</i> | miR-4681                 | 1 |
| <i>circICA1</i> | miR-4682                 | 1 |
| <i>circICA1</i> | miR-4683                 | 3 |

|                 |                     |   |
|-----------------|---------------------|---|
| <i>circICA1</i> | miR-4684-3p         | 1 |
| <i>circICA1</i> | miR-4684-5p         | 1 |
| <i>circICA1</i> | miR-4686            | 1 |
| <i>circICA1</i> | miR-4688/6743-5p    | 1 |
| <i>circICA1</i> | miR-4689/6858-5p    | 1 |
| <i>circICA1</i> | miR-4690-3p/5685    | 1 |
| <i>circICA1</i> | miR-4690-5p         | 5 |
| <i>circICA1</i> | miR-4691-3p         | 3 |
| <i>circICA1</i> | miR-4691-5p/6792-3p | 4 |
| <i>circICA1</i> | miR-4693-3p         | 6 |
| <i>circICA1</i> | miR-4693-5p         | 1 |
| <i>circICA1</i> | miR-4694-3p         | 6 |
| <i>circICA1</i> | miR-4694-5p         | 1 |
| <i>circICA1</i> | miR-4695-5p         | 4 |
| <i>circICA1</i> | miR-4696            | 1 |
| <i>circICA1</i> | miR-4697-3p         | 3 |
| <i>circICA1</i> | miR-4698            | 3 |
| <i>circICA1</i> | miR-4699-3p         | 5 |
| <i>circICA1</i> | miR-4699-5p         | 6 |
| <i>circICA1</i> | miR-4700-3p         | 3 |
| <i>circICA1</i> | miR-4703-3p         | 1 |
| <i>circICA1</i> | miR-4704-5p         | 3 |
| <i>circICA1</i> | miR-4707-5p         | 1 |
| <i>circICA1</i> | miR-4708-3p         | 1 |
| <i>circICA1</i> | miR-4708-5p         | 3 |
| <i>circICA1</i> | miR-4709-3p         | 4 |
| <i>circICA1</i> | miR-4709-5p         | 4 |
| <i>circICA1</i> | miR-4711-3p         | 2 |
| <i>circICA1</i> | miR-4711-5p         | 2 |
| <i>circICA1</i> | miR-4712-3p         | 5 |
| <i>circICA1</i> | miR-4713-5p         | 1 |
| <i>circICA1</i> | miR-4714-5p         | 3 |
| <i>circICA1</i> | miR-4715-5p         | 2 |
| <i>circICA1</i> | miR-4717-3p         | 2 |
| <i>circICA1</i> | miR-4717-5p         | 2 |
| <i>circICA1</i> | miR-4719            | 2 |
| <i>circICA1</i> | miR-4720-3p         | 1 |
| <i>circICA1</i> | miR-4721            | 1 |

|                 |                     |   |
|-----------------|---------------------|---|
| <i>circICA1</i> | miR-4722-3p/6727-3p | 1 |
| <i>circICA1</i> | miR-4722-5p         | 7 |
| <i>circICA1</i> | miR-4725-5p         | 2 |
| <i>circICA1</i> | miR-4726-3p         | 2 |
| <i>circICA1</i> | miR-4727-5p         | 2 |
| <i>circICA1</i> | miR-4728-3p         | 1 |
| <i>circICA1</i> | miR-4729            | 1 |
| <i>circICA1</i> | miR-4731-3p/4801    | 4 |
| <i>circICA1</i> | miR-4732-3p         | 1 |
| <i>circICA1</i> | miR-4732-5p         | 1 |
| <i>circICA1</i> | miR-4733-5p         | 2 |
| <i>circICA1</i> | miR-4735-5p         | 1 |
| <i>circICA1</i> | miR-4736            | 3 |
| <i>circICA1</i> | miR-4738-5p         | 1 |
| <i>circICA1</i> | miR-4739            | 2 |
| <i>circICA1</i> | miR-4742-3p         | 1 |
| <i>circICA1</i> | miR-4743-3p         | 1 |
| <i>circICA1</i> | miR-4744            | 1 |
| <i>circICA1</i> | miR-4747-3p         | 2 |
| <i>circICA1</i> | miR-4747-5p/5196-5p | 4 |
| <i>circICA1</i> | miR-4749-3p         | 1 |
| <i>circICA1</i> | miR-4750-5p         | 4 |
| <i>circICA1</i> | miR-4753-3p         | 3 |
| <i>circICA1</i> | miR-4753-5p         | 3 |
| <i>circICA1</i> | miR-4755-3p         | 1 |
| <i>circICA1</i> | miR-4755-5p/5006-3p | 1 |
| <i>circICA1</i> | miR-4756-3p         | 3 |
| <i>circICA1</i> | miR-4757-5p/6744-3p | 1 |
| <i>circICA1</i> | miR-4758-3p         | 1 |
| <i>circICA1</i> | miR-4759            | 2 |
| <i>circICA1</i> | miR-4760-3p         | 3 |
| <i>circICA1</i> | miR-4761-5p         | 2 |
| <i>circICA1</i> | miR-4762-3p         | 3 |
| <i>circICA1</i> | miR-4762-5p         | 1 |
| <i>circICA1</i> | miR-4764-5p         | 2 |
| <i>circICA1</i> | miR-4765            | 2 |
| <i>circICA1</i> | miR-4766-3p         | 2 |
| <i>circICA1</i> | miR-4766-5p         | 2 |

|                 |                     |   |
|-----------------|---------------------|---|
| <i>circICA1</i> | miR-4768-3p         | 7 |
| <i>circICA1</i> | miR-4768-5p/6833-3p | 1 |
| <i>circICA1</i> | miR-4771            | 1 |
| <i>circICA1</i> | miR-4772-3p         | 1 |
| <i>circICA1</i> | miR-4772-5p         | 1 |
| <i>circICA1</i> | miR-4774-3p         | 5 |
| <i>circICA1</i> | miR-4775            | 2 |
| <i>circICA1</i> | miR-4776-3p         | 1 |
| <i>circICA1</i> | miR-4777-3p         | 1 |
| <i>circICA1</i> | miR-4778-3p         | 3 |
| <i>circICA1</i> | miR-4778-5p         | 1 |
| <i>circICA1</i> | miR-4779            | 4 |
| <i>circICA1</i> | miR-4781-3p         | 3 |
| <i>circICA1</i> | miR-4782-5p/5706    | 3 |
| <i>circICA1</i> | miR-4786-5p         | 3 |
| <i>circICA1</i> | miR-4789-3p         | 1 |
| <i>circICA1</i> | miR-4789-5p         | 1 |
| <i>circICA1</i> | miR-4790-3p         | 1 |
| <i>circICA1</i> | miR-4793-3p         | 1 |
| <i>circICA1</i> | miR-4793-5p         | 1 |
| <i>circICA1</i> | miR-4795-3p         | 5 |
| <i>circICA1</i> | miR-4795-5p         | 3 |
| <i>circICA1</i> | miR-4796-3p         | 1 |
| <i>circICA1</i> | miR-4796-5p         | 1 |
| <i>circICA1</i> | miR-4797-3p         | 1 |
| <i>circICA1</i> | miR-4797-5p         | 4 |
| <i>circICA1</i> | miR-4799-5p         | 1 |
| <i>circICA1</i> | miR-4802-3p         | 1 |
| <i>circICA1</i> | miR-4802-5p         | 6 |
| <i>circICA1</i> | miR-4803            | 3 |
| <i>circICA1</i> | miR-4804-3p         | 1 |
| <i>circICA1</i> | miR-483-3p.2        | 1 |
| <i>circICA1</i> | miR-483-5p          | 1 |
| <i>circICA1</i> | miR-484/3155        | 2 |
| <i>circICA1</i> | miR-485-5p          | 1 |
| <i>circICA1</i> | miR-486-3p          | 1 |
| <i>circICA1</i> | miR-486-5p          | 1 |
| <i>circICA1</i> | miR-488-3p          | 2 |

|                 |                             |    |
|-----------------|-----------------------------|----|
| <i>circICA1</i> | miR-489-3p                  | 1  |
| <i>circICA1</i> | miR-490-3p                  | 3  |
| <i>circICA1</i> | miR-490-5p                  | 5  |
| <i>circICA1</i> | miR-492                     | 3  |
| <i>circICA1</i> | miR-493-3p                  | 3  |
| <i>circICA1</i> | miR-493-5p                  | 1  |
| <i>circICA1</i> | miR-494-3p                  | 1  |
| <i>circICA1</i> | miR-495-3p                  | 2  |
| <i>circICA1</i> | miR-496.1                   | 1  |
| <i>circICA1</i> | miR-496.2                   | 2  |
| <i>circICA1</i> | miR-497-3p                  | 1  |
| <i>circICA1</i> | miR-499a-3p/499b-3p         | 1  |
| <i>circICA1</i> | miR-499a-5p                 | 2  |
| <i>circICA1</i> | miR-499b-5p                 | 1  |
| <i>circICA1</i> | miR-5000-3p                 | 6  |
| <i>circICA1</i> | miR-5000-5p                 | 3  |
| <i>circICA1</i> | miR-5001-3p                 | 2  |
| <i>circICA1</i> | miR-5002-5p                 | 1  |
| <i>circICA1</i> | miR-5003-3p                 | 5  |
| <i>circICA1</i> | miR-5006-5p                 | 1  |
| <i>circICA1</i> | miR-5007-5p                 | 2  |
| <i>circICA1</i> | miR-5008-3p/6737-3p/7157-3p | 1  |
| <i>circICA1</i> | miR-5008-5p                 | 1  |
| <i>circICA1</i> | miR-5009-5p/8058            | 1  |
| <i>circICA1</i> | miR-500a-5p                 | 5  |
| <i>circICA1</i> | miR-501-5p                  | 4  |
| <i>circICA1</i> | miR-5010-3p                 | 4  |
| <i>circICA1</i> | miR-5011-3p                 | 2  |
| <i>circICA1</i> | miR-502-5p                  | 2  |
| <i>circICA1</i> | miR-503-5p                  | 1  |
| <i>circICA1</i> | miR-504-3p                  | 10 |
| <i>circICA1</i> | miR-504-5p.1                | 2  |
| <i>circICA1</i> | miR-505-3p.2                | 1  |
| <i>circICA1</i> | miR-505-5p                  | 1  |
| <i>circICA1</i> | miR-506-5p                  | 4  |
| <i>circICA1</i> | miR-507/557                 | 1  |
| <i>circICA1</i> | miR-508-3p                  | 1  |
| <i>circICA1</i> | miR-508-5p                  | 2  |

|                 |                             |    |
|-----------------|-----------------------------|----|
| <i>circICA1</i> | miR-5088-3p                 | 2  |
| <i>circICA1</i> | miR-5089-3p                 | 1  |
| <i>circICA1</i> | miR-509-3-5p/509-5p/4418    | 4  |
| <i>circICA1</i> | miR-509-3p                  | 2  |
| <i>circICA1</i> | miR-5091                    | 1  |
| <i>circICA1</i> | miR-5093                    | 1  |
| <i>circICA1</i> | miR-5094                    | 1  |
| <i>circICA1</i> | miR-5095/7151-3p            | 3  |
| <i>circICA1</i> | miR-5096                    | 4  |
| <i>circICA1</i> | miR-510-3p                  | 1  |
| <i>circICA1</i> | miR-5100                    | 6  |
| <i>circICA1</i> | miR-511-5p                  | 2  |
| <i>circICA1</i> | miR-512-5p                  | 4  |
| <i>circICA1</i> | miR-513a-3p/513c-3p/3606-3p | 2  |
| <i>circICA1</i> | miR-513a-5p                 | 1  |
| <i>circICA1</i> | miR-513b-3p                 | 2  |
| <i>circICA1</i> | miR-513b-5p                 | 1  |
| <i>circICA1</i> | miR-513c-5p/514b-5p         | 3  |
| <i>circICA1</i> | miR-514a-3p                 | 3  |
| <i>circICA1</i> | miR-514a-5p                 | 3  |
| <i>circICA1</i> | miR-516a-3p/516b-3p/7162-5p | 1  |
| <i>circICA1</i> | miR-516b-5p                 | 3  |
| <i>circICA1</i> | miR-517-5p                  | 2  |
| <i>circICA1</i> | miR-518-3p                  | 1  |
| <i>circICA1</i> | miR-5186                    | 1  |
| <i>circICA1</i> | miR-5187-3p                 | 1  |
| <i>circICA1</i> | miR-5187-5p                 | 1  |
| <i>circICA1</i> | miR-5189-3p                 | 1  |
| <i>circICA1</i> | miR-518a-5p/527             | 2  |
| <i>circICA1</i> | miR-518c-5p                 | 1  |
| <i>circICA1</i> | miR-518e-3p                 | 1  |
| <i>circICA1</i> | miR-519-3p                  | 2  |
| <i>circICA1</i> | miR-5190                    | 2  |
| <i>circICA1</i> | miR-5192                    | 4  |
| <i>circICA1</i> | miR-5193                    | 3  |
| <i>circICA1</i> | miR-5194                    | 1  |
| <i>circICA1</i> | miR-5196-3p                 | 1  |
| <i>circICA1</i> | miR-5197-3p                 | 12 |

|                 |                                                                  |   |
|-----------------|------------------------------------------------------------------|---|
| <i>circICA1</i> | miR-5197-5p                                                      | 1 |
| <i>circICA1</i> | miR-520g-3p                                                      | 3 |
| <i>circICA1</i> | miR-520g-5p                                                      | 4 |
| <i>circICA1</i> | miR-522-3p                                                       | 6 |
| <i>circICA1</i> | miR-523-3p                                                       | 1 |
| <i>circICA1</i> | miR-524-5p                                                       | 3 |
| <i>circICA1</i> | miR-525-5p                                                       | 2 |
| <i>circICA1</i> | miR-526b-5p                                                      | 1 |
| <i>circICA1</i> | miR-532-5p                                                       | 3 |
| <i>circICA1</i> | miR-539-3p                                                       | 1 |
| <i>circICA1</i> | miR-539-5p                                                       | 7 |
| <i>circICA1</i> | miR-541-5p                                                       | 2 |
| <i>circICA1</i> | miR-542-3p                                                       | 1 |
| <i>circICA1</i> | miR-543                                                          | 1 |
| <i>circICA1</i> | miR-544b                                                         | 1 |
| <i>circICA1</i> | miR-545-3p                                                       | 1 |
| <i>circICA1</i> | miR-545-5p                                                       | 1 |
| <i>circICA1</i> | miR-548ac/548bb-3p/548d-3p/548h-3p/548z                          | 1 |
| <i>circICA1</i> | miR-548ad-3p                                                     | 2 |
| <i>circICA1</i> | miR-548ah-5p/3609                                                | 3 |
| <i>circICA1</i> | miR-548ai/548ag/548ba/570-5p                                     | 2 |
| <i>circICA1</i> | miR-548aj-5p/548f-5p/548g-5p/548x-5p                             | 2 |
| <i>circICA1</i> | miR-548an                                                        | 2 |
| <i>circICA1</i> | miR-548ao-3p                                                     | 4 |
| <i>circICA1</i> | miR-548ap-3p/548aa/548t-3p                                       | 2 |
| <i>circICA1</i> | miR-548aq-3p/548am-3p/548aj-3p/548ah-3p/548ae-3p/548j-3p/548x-3p | 3 |
| <i>circICA1</i> | miR-548as-3p                                                     | 2 |
| <i>circICA1</i> | miR-548at-5p                                                     | 2 |
| <i>circICA1</i> | miR-548au-3p                                                     | 1 |
| <i>circICA1</i> | miR-548av-5p/548k/8054                                           | 4 |
| <i>circICA1</i> | miR-548aw                                                        | 2 |
| <i>circICA1</i> | miR-548ay-3p/548at-3p                                            | 2 |
| <i>circICA1</i> | miR-548ay-5p/548au-5p/548as-5p/548ar-5p/548aq-5p/548ap-5p/548am- | 4 |
| <i>circICA1</i> | miR-548az-3p/548ar-3p/548a-3p/548e-3p/548f-3p                    | 5 |
| <i>circICA1</i> | miR-548az-5p/548t-5p                                             | 5 |
| <i>circICA1</i> | miR-548c-3p                                                      | 4 |
| <i>circICA1</i> | miR-548e-5p                                                      | 2 |
| <i>circICA1</i> | miR-548g-3p                                                      | 6 |



|                 |                  |   |
|-----------------|------------------|---|
| <i>circICA1</i> | miR-548l         | 4 |
| <i>circICA1</i> | miR-548m         | 5 |
| <i>circICA1</i> | miR-548n         | 5 |
| <i>circICA1</i> | miR-548p         | 8 |
| <i>circICA1</i> | miR-548s         | 2 |
| <i>circICA1</i> | miR-548u/7161-5p | 1 |
| <i>circICA1</i> | miR-548v         | 3 |
| <i>circICA1</i> | miR-550b-2-5p    | 1 |
| <i>circICA1</i> | miR-550b-3p      | 1 |
| <i>circICA1</i> | miR-551b-5p      | 2 |
| <i>circICA1</i> | miR-552-5p       | 1 |
| <i>circICA1</i> | miR-554          | 1 |
| <i>circICA1</i> | miR-556-5p       | 2 |
| <i>circICA1</i> | miR-5572         | 2 |
| <i>circICA1</i> | miR-5579-3p      | 1 |
| <i>circICA1</i> | miR-5581-3p      | 4 |
| <i>circICA1</i> | miR-5582-3p      | 5 |
| <i>circICA1</i> | miR-5583-3p      | 1 |
| <i>circICA1</i> | miR-5584-3p      | 3 |
| <i>circICA1</i> | miR-5584-5p      | 4 |
| <i>circICA1</i> | miR-5586-3p      | 4 |
| <i>circICA1</i> | miR-5586-5p      | 2 |
| <i>circICA1</i> | miR-5587-3p      | 1 |
| <i>circICA1</i> | miR-5587-5p      | 1 |
| <i>circICA1</i> | miR-5588-3p      | 2 |
| <i>circICA1</i> | miR-561-3p       | 2 |
| <i>circICA1</i> | miR-568          | 1 |
| <i>circICA1</i> | miR-5680         | 5 |
| <i>circICA1</i> | miR-5681a        | 2 |
| <i>circICA1</i> | miR-5683         | 1 |
| <i>circICA1</i> | miR-5684         | 1 |
| <i>circICA1</i> | miR-5687         | 1 |
| <i>circICA1</i> | miR-569          | 1 |
| <i>circICA1</i> | miR-5690         | 1 |
| <i>circICA1</i> | miR-5692a        | 7 |
| <i>circICA1</i> | miR-5692bc       | 1 |
| <i>circICA1</i> | miR-5693         | 3 |
| <i>circICA1</i> | miR-5696         | 4 |

|                 |                  |    |
|-----------------|------------------|----|
| <i>circICA1</i> | miR-5699-5p      | 1  |
| <i>circICA1</i> | miR-570-3p       | 8  |
| <i>circICA1</i> | miR-5702         | 1  |
| <i>circICA1</i> | miR-5708         | 1  |
| <i>circICA1</i> | miR-571          | 1  |
| <i>circICA1</i> | miR-573/3616-5p  | 2  |
| <i>circICA1</i> | miR-5739         | 1  |
| <i>circICA1</i> | miR-574-3p       | 1  |
| <i>circICA1</i> | miR-574-5p       | 2  |
| <i>circICA1</i> | miR-575/4676-5p  | 4  |
| <i>circICA1</i> | miR-576-5p       | 2  |
| <i>circICA1</i> | miR-577          | 4  |
| <i>circICA1</i> | miR-578          | 2  |
| <i>circICA1</i> | miR-579-3p       | 4  |
| <i>circICA1</i> | miR-580-3p       | 5  |
| <i>circICA1</i> | miR-580-5p       | 2  |
| <i>circICA1</i> | miR-582-3p       | 2  |
| <i>circICA1</i> | miR-583          | 5  |
| <i>circICA1</i> | miR-586          | 1  |
| <i>circICA1</i> | miR-588          | 2  |
| <i>circICA1</i> | miR-589-5p       | 3  |
| <i>circICA1</i> | miR-590-3p       | 1  |
| <i>circICA1</i> | miR-591          | 1  |
| <i>circICA1</i> | miR-592          | 4  |
| <i>circICA1</i> | miR-596          | 3  |
| <i>circICA1</i> | miR-598-5p       | 3  |
| <i>circICA1</i> | miR-599          | 4  |
| <i>circICA1</i> | miR-602          | 1  |
| <i>circICA1</i> | miR-605-3p       | 1  |
| <i>circICA1</i> | miR-605-5p       | 4  |
| <i>circICA1</i> | miR-606          | 1  |
| <i>circICA1</i> | miR-607          | 8  |
| <i>circICA1</i> | miR-6071         | 4  |
| <i>circICA1</i> | miR-6074         | 1  |
| <i>circICA1</i> | miR-6076/6797-3p | 1  |
| <i>circICA1</i> | miR-6077         | 10 |
| <i>circICA1</i> | miR-6079         | 2  |
| <i>circICA1</i> | miR-6081         | 4  |

|                 |                                      |   |
|-----------------|--------------------------------------|---|
| <i>circICA1</i> | miR-6083                             | 2 |
| <i>circICA1</i> | miR-6085/6813-5p                     | 1 |
| <i>circICA1</i> | miR-6089                             | 1 |
| <i>circICA1</i> | miR-6090                             | 1 |
| <i>circICA1</i> | miR-610                              | 1 |
| <i>circICA1</i> | miR-612/1285-3p/3187-5p/5189-5p/6860 | 3 |
| <i>circICA1</i> | miR-6124                             | 3 |
| <i>circICA1</i> | miR-6126                             | 4 |
| <i>circICA1</i> | miR-6132/6836-5p                     | 1 |
| <i>circICA1</i> | miR-6134                             | 1 |
| <i>circICA1</i> | miR-615-3p                           | 1 |
| <i>circICA1</i> | miR-6165                             | 5 |
| <i>circICA1</i> | miR-619-3p                           | 3 |
| <i>circICA1</i> | miR-619-5p/6506-5p                   | 8 |
| <i>circICA1</i> | miR-621                              | 2 |
| <i>circICA1</i> | miR-623                              | 1 |
| <i>circICA1</i> | miR-624-3p                           | 1 |
| <i>circICA1</i> | miR-627-3p                           | 5 |
| <i>circICA1</i> | miR-627-5p                           | 1 |
| <i>circICA1</i> | miR-628-5p                           | 3 |
| <i>circICA1</i> | miR-629-3p                           | 1 |
| <i>circICA1</i> | miR-629-5p                           | 1 |
| <i>circICA1</i> | miR-631/3661                         | 4 |
| <i>circICA1</i> | miR-632/4288                         | 2 |
| <i>circICA1</i> | miR-633                              | 1 |
| <i>circICA1</i> | miR-634                              | 3 |
| <i>circICA1</i> | miR-636                              | 1 |
| <i>circICA1</i> | miR-637                              | 1 |
| <i>circICA1</i> | miR-640                              | 2 |
| <i>circICA1</i> | miR-642-3p                           | 2 |
| <i>circICA1</i> | miR-646                              | 1 |
| <i>circICA1</i> | miR-647                              | 5 |
| <i>circICA1</i> | miR-648                              | 1 |
| <i>circICA1</i> | miR-649                              | 3 |
| <i>circICA1</i> | miR-6499-3p                          | 1 |
| <i>circICA1</i> | miR-6499-5p                          | 1 |
| <i>circICA1</i> | miR-6500-3p                          | 2 |
| <i>circICA1</i> | miR-6501-3p                          | 3 |

|                 |                     |   |
|-----------------|---------------------|---|
| <i>circICA1</i> | miR-6501-5p         | 3 |
| <i>circICA1</i> | miR-6502-3p         | 5 |
| <i>circICA1</i> | miR-6503-3p         | 1 |
| <i>circICA1</i> | miR-6507-3p         | 1 |
| <i>circICA1</i> | miR-6507-5p         | 2 |
| <i>circICA1</i> | miR-6508-3p         | 5 |
| <i>circICA1</i> | miR-6508-5p/8067    | 2 |
| <i>circICA1</i> | miR-6509-3p         | 1 |
| <i>circICA1</i> | miR-651-3p          | 4 |
| <i>circICA1</i> | miR-651-5p          | 2 |
| <i>circICA1</i> | miR-6510-5p         | 5 |
| <i>circICA1</i> | miR-6511-5p         | 3 |
| <i>circICA1</i> | miR-6513-3p         | 3 |
| <i>circICA1</i> | miR-6513-5p         | 6 |
| <i>circICA1</i> | miR-6514-3p         | 1 |
| <i>circICA1</i> | miR-6514-5p         | 6 |
| <i>circICA1</i> | miR-6515-5p         | 2 |
| <i>circICA1</i> | miR-6516-5p         | 2 |
| <i>circICA1</i> | miR-654-5p          | 1 |
| <i>circICA1</i> | miR-655-5p          | 2 |
| <i>circICA1</i> | miR-656-3p          | 1 |
| <i>circICA1</i> | miR-659-5p          | 3 |
| <i>circICA1</i> | miR-660-3p          | 3 |
| <i>circICA1</i> | miR-660-5p          | 1 |
| <i>circICA1</i> | miR-661             | 3 |
| <i>circICA1</i> | miR-664a-5p/4794    | 1 |
| <i>circICA1</i> | miR-668-5p          | 2 |
| <i>circICA1</i> | miR-670-3p          | 3 |
| <i>circICA1</i> | miR-670-5p          | 3 |
| <i>circICA1</i> | miR-671-5p          | 2 |
| <i>circICA1</i> | miR-6715a-3p        | 1 |
| <i>circICA1</i> | miR-6719-3p         | 1 |
| <i>circICA1</i> | miR-6720-3p         | 2 |
| <i>circICA1</i> | miR-6720-5p         | 2 |
| <i>circICA1</i> | miR-6721-5p         | 1 |
| <i>circICA1</i> | miR-6722-5p         | 1 |
| <i>circICA1</i> | miR-6724-5p/6773-5p | 1 |
| <i>circICA1</i> | miR-6728-3p         | 5 |

|                 |                       |    |
|-----------------|-----------------------|----|
| <i>circICA1</i> | miR-6729-3p           | 1  |
| <i>circICA1</i> | miR-6730-3p           | 1  |
| <i>circICA1</i> | miR-6730-5p           | 2  |
| <i>circICA1</i> | miR-6731-5p/8085      | 10 |
| <i>circICA1</i> | miR-6734-3p           | 1  |
| <i>circICA1</i> | miR-6734-5p           | 1  |
| <i>circICA1</i> | miR-6740-3p           | 1  |
| <i>circICA1</i> | miR-6740-5p           | 2  |
| <i>circICA1</i> | miR-6742-3p           | 9  |
| <i>circICA1</i> | miR-6743-3p           | 1  |
| <i>circICA1</i> | miR-6744-5p           | 2  |
| <i>circICA1</i> | miR-6747-3p           | 1  |
| <i>circICA1</i> | miR-6748-3p           | 2  |
| <i>circICA1</i> | miR-6749-3p           | 4  |
| <i>circICA1</i> | miR-6749-5p           | 3  |
| <i>circICA1</i> | miR-6750-3p           | 2  |
| <i>circICA1</i> | miR-6750-5p/6822-5p   | 4  |
| <i>circICA1</i> | miR-6751-5p/6803-5p   | 1  |
| <i>circICA1</i> | miR-6753-5p           | 3  |
| <i>circICA1</i> | miR-6757-5p           | 2  |
| <i>circICA1</i> | miR-6758-5p/6856-5p   | 2  |
| <i>circICA1</i> | miR-676-3p            | 1  |
| <i>circICA1</i> | miR-676-5p            | 3  |
| <i>circICA1</i> | miR-6760-5p           | 2  |
| <i>circICA1</i> | miR-6761-3p           | 1  |
| <i>circICA1</i> | miR-6761-5p           | 1  |
| <i>circICA1</i> | miR-6762-5p/6845-5p   | 1  |
| <i>circICA1</i> | miR-6764-3p/6824-3p   | 1  |
| <i>circICA1</i> | miR-6765-5p           | 1  |
| <i>circICA1</i> | miR-6767-5p           | 1  |
| <i>circICA1</i> | miR-6768-3p           | 2  |
| <i>circICA1</i> | miR-6769a-5p/6769b-5p | 1  |
| <i>circICA1</i> | miR-6770-5p           | 4  |
| <i>circICA1</i> | miR-6772-3p           | 2  |
| <i>circICA1</i> | miR-6774-3p           | 2  |
| <i>circICA1</i> | miR-6776-3p           | 1  |
| <i>circICA1</i> | miR-6776-5p           | 1  |
| <i>circICA1</i> | miR-6777-3p           | 3  |

|                 |                     |   |
|-----------------|---------------------|---|
| <i>circICA1</i> | miR-6780a-3p        | 3 |
| <i>circICA1</i> | miR-6781-5p         | 1 |
| <i>circICA1</i> | miR-6783-5p         | 1 |
| <i>circICA1</i> | miR-6787-3p         | 1 |
| <i>circICA1</i> | miR-6790-3p         | 2 |
| <i>circICA1</i> | miR-6793-3p         | 3 |
| <i>circICA1</i> | miR-6799-5p         | 2 |
| <i>circICA1</i> | miR-6800-3p         | 3 |
| <i>circICA1</i> | miR-6807-5p         | 1 |
| <i>circICA1</i> | miR-6809-3p         | 1 |
| <i>circICA1</i> | miR-6810-5p         | 2 |
| <i>circICA1</i> | miR-6813-3p         | 3 |
| <i>circICA1</i> | miR-6814-5p         | 2 |
| <i>circICA1</i> | miR-6815-5p/6865-5p | 1 |
| <i>circICA1</i> | miR-6816-3p         | 2 |
| <i>circICA1</i> | miR-6817-3p         | 1 |
| <i>circICA1</i> | miR-6818-3p         | 6 |
| <i>circICA1</i> | miR-6818-5p         | 1 |
| <i>circICA1</i> | miR-6821-3p         | 2 |
| <i>circICA1</i> | miR-6822-3p         | 1 |
| <i>circICA1</i> | miR-6825-5p         | 1 |
| <i>circICA1</i> | miR-6826-5p         | 1 |
| <i>circICA1</i> | miR-6827-5p         | 3 |
| <i>circICA1</i> | miR-6828-3p         | 4 |
| <i>circICA1</i> | miR-6828-5p         | 2 |
| <i>circICA1</i> | miR-6830-3p         | 2 |
| <i>circICA1</i> | miR-6830-5p         | 2 |
| <i>circICA1</i> | miR-6831-3p         | 1 |
| <i>circICA1</i> | miR-6832-5p         | 1 |
| <i>circICA1</i> | miR-6834-3p         | 1 |
| <i>circICA1</i> | miR-6834-5p         | 1 |
| <i>circICA1</i> | miR-6836-3p         | 4 |
| <i>circICA1</i> | miR-6839-3p         | 1 |
| <i>circICA1</i> | miR-6840-3p         | 2 |
| <i>circICA1</i> | miR-6841-3p         | 2 |
| <i>circICA1</i> | miR-6842-3p         | 5 |
| <i>circICA1</i> | miR-6844            | 1 |
| <i>circICA1</i> | miR-6846-3p         | 3 |

|                 |                     |    |
|-----------------|---------------------|----|
| <i>circICA1</i> | miR-6846-5p/6848-5p | 1  |
| <i>circICA1</i> | miR-6849-3p         | 3  |
| <i>circICA1</i> | miR-6851-3p         | 3  |
| <i>circICA1</i> | miR-6852-5p         | 9  |
| <i>circICA1</i> | miR-6854-5p         | 2  |
| <i>circICA1</i> | miR-6857-5p         | 2  |
| <i>circICA1</i> | miR-6858-3p         | 4  |
| <i>circICA1</i> | miR-6859-3p         | 3  |
| <i>circICA1</i> | miR-6861-3p         | 3  |
| <i>circICA1</i> | miR-6861-5p         | 1  |
| <i>circICA1</i> | miR-6864-5p         | 4  |
| <i>circICA1</i> | miR-6866-5p         | 5  |
| <i>circICA1</i> | miR-6867-3p         | 1  |
| <i>circICA1</i> | miR-6867-5p         | 1  |
| <i>circICA1</i> | miR-6868-3p         | 2  |
| <i>circICA1</i> | miR-6871-5p         | 1  |
| <i>circICA1</i> | miR-6873-5p         | 3  |
| <i>circICA1</i> | miR-6874-5p         | 5  |
| <i>circICA1</i> | miR-6875-3p         | 3  |
| <i>circICA1</i> | miR-6877-5p         | 1  |
| <i>circICA1</i> | miR-6878-3p         | 6  |
| <i>circICA1</i> | miR-6878-5p         | 10 |
| <i>circICA1</i> | miR-6880-3p         | 2  |
| <i>circICA1</i> | miR-6881-3p         | 3  |
| <i>circICA1</i> | miR-6882-5p         | 3  |
| <i>circICA1</i> | miR-6888-5p         | 1  |
| <i>circICA1</i> | miR-6889-3p         | 1  |
| <i>circICA1</i> | miR-6890-3p         | 2  |
| <i>circICA1</i> | miR-6892-3p         | 2  |
| <i>circICA1</i> | miR-6892-5p         | 1  |
| <i>circICA1</i> | miR-6894-3p         | 1  |
| <i>circICA1</i> | miR-6894-5p         | 3  |
| <i>circICA1</i> | miR-6895-5p         | 2  |
| <i>circICA1</i> | miR-7-5p            | 10 |
| <i>circICA1</i> | miR-7106-5p         | 2  |
| <i>circICA1</i> | miR-7109-5p         | 1  |
| <i>circICA1</i> | miR-711             | 1  |
| <i>circICA1</i> | miR-7110-3p         | 1  |

|                 |             |   |
|-----------------|-------------|---|
| <i>circICA1</i> | miR-7111-3p | 3 |
| <i>circICA1</i> | miR-7112-3p | 2 |
| <i>circICA1</i> | miR-7150    | 4 |
| <i>circICA1</i> | miR-7151-5p | 3 |
| <i>circICA1</i> | miR-7152-5p | 3 |
| <i>circICA1</i> | miR-7154-3p | 3 |
| <i>circICA1</i> | miR-7155-5p | 1 |
| <i>circICA1</i> | miR-7156-3p | 1 |
| <i>circICA1</i> | miR-7158-3p | 2 |
| <i>circICA1</i> | miR-7158-5p | 5 |
| <i>circICA1</i> | miR-7159-3p | 1 |
| <i>circICA1</i> | miR-7159-5p | 1 |
| <i>circICA1</i> | miR-7160-3p | 2 |
| <i>circICA1</i> | miR-7160-5p | 2 |
| <i>circICA1</i> | miR-7161-3p | 1 |
| <i>circICA1</i> | miR-7162-3p | 3 |
| <i>circICA1</i> | miR-744-3p  | 4 |
| <i>circICA1</i> | miR-758-3p  | 1 |
| <i>circICA1</i> | miR-759     | 3 |
| <i>circICA1</i> | miR-760     | 1 |
| <i>circICA1</i> | miR-764     | 1 |
| <i>circICA1</i> | miR-7641    | 1 |
| <i>circICA1</i> | miR-765     | 3 |
| <i>circICA1</i> | miR-766-3p  | 2 |
| <i>circICA1</i> | miR-766-5p  | 3 |
| <i>circICA1</i> | miR-767-3p  | 1 |
| <i>circICA1</i> | miR-767-5p  | 1 |
| <i>circICA1</i> | miR-769-5p  | 3 |
| <i>circICA1</i> | miR-770-5p  | 1 |
| <i>circICA1</i> | miR-7702    | 3 |
| <i>circICA1</i> | miR-7703    | 1 |
| <i>circICA1</i> | miR-7705    | 1 |
| <i>circICA1</i> | miR-7844-5p | 1 |
| <i>circICA1</i> | miR-7845-5p | 1 |
| <i>circICA1</i> | miR-7847-3p | 3 |
| <i>circICA1</i> | miR-7848-3p | 1 |
| <i>circICA1</i> | miR-7850-5p | 3 |
| <i>circICA1</i> | miR-7851-3p | 3 |



|                 |              |   |
|-----------------|--------------|---|
| <i>circICA1</i> | miR-7852-3p  | 1 |
| <i>circICA1</i> | miR-7854-3p  | 1 |
| <i>circICA1</i> | miR-7855-5p  | 1 |
| <i>circICA1</i> | miR-7856-5p  | 1 |
| <i>circICA1</i> | miR-7973     | 1 |
| <i>circICA1</i> | miR-7976     | 1 |
| <i>circICA1</i> | miR-7977     | 3 |
| <i>circICA1</i> | miR-802      | 1 |
| <i>circICA1</i> | miR-8055     | 2 |
| <i>circICA1</i> | miR-8056     | 2 |
| <i>circICA1</i> | miR-8060     | 2 |
| <i>circICA1</i> | miR-8062     | 1 |
| <i>circICA1</i> | miR-8063     | 3 |
| <i>circICA1</i> | miR-8068     | 3 |
| <i>circICA1</i> | miR-8074     | 4 |
| <i>circICA1</i> | miR-8077     | 2 |
| <i>circICA1</i> | miR-8080     | 2 |
| <i>circICA1</i> | miR-8081     | 2 |
| <i>circICA1</i> | miR-8083     | 2 |
| <i>circICA1</i> | miR-8084     | 1 |
| <i>circICA1</i> | miR-8087     | 4 |
| <i>circICA1</i> | miR-873-3p   | 3 |
| <i>circICA1</i> | miR-873-5p.1 | 5 |
| <i>circICA1</i> | miR-873-5p.2 | 7 |
| <i>circICA1</i> | miR-874-3p   | 1 |
| <i>circICA1</i> | miR-874-5p   | 1 |
| <i>circICA1</i> | miR-875-3p   | 1 |
| <i>circICA1</i> | miR-875-5p   | 1 |
| <i>circICA1</i> | miR-876-3p   | 1 |
| <i>circICA1</i> | miR-877-3p   | 1 |
| <i>circICA1</i> | miR-877-5p   | 5 |
| <i>circICA1</i> | miR-885-3p   | 4 |
| <i>circICA1</i> | miR-887-5p   | 6 |
| <i>circICA1</i> | miR-888-5p   | 1 |
| <i>circICA1</i> | miR-889-3p   | 1 |
| <i>circICA1</i> | miR-890      | 4 |
| <i>circICA1</i> | miR-891a-3p  | 1 |
| <i>circICA1</i> | miR-892-5p   | 4 |

|                 |                                    |   |
|-----------------|------------------------------------|---|
| <i>circICA1</i> | miR-892a                           | 1 |
| <i>circICA1</i> | miR-892b                           | 4 |
| <i>circICA1</i> | miR-9-3p                           | 3 |
| <i>circICA1</i> | miR-9-5p                           | 2 |
| <i>circICA1</i> | miR-920/4300/5591-5p/6726-5p       | 1 |
| <i>circICA1</i> | miR-921                            | 1 |
| <i>circICA1</i> | miR-922                            | 2 |
| <i>circICA1</i> | miR-924                            | 2 |
| <i>circICA1</i> | miR-92a-1-5p                       | 2 |
| <i>circICA1</i> | miR-92a-2-5p                       | 1 |
| <i>circICA1</i> | miR-93-3p                          | 2 |
| <i>circICA1</i> | miR-933                            | 2 |
| <i>circICA1</i> | miR-935                            | 1 |
| <i>circICA1</i> | miR-936                            | 1 |
| <i>circICA1</i> | miR-937-5p                         | 1 |
| <i>circICA1</i> | miR-939-3p                         | 9 |
| <i>circICA1</i> | miR-939-5p/1343-5p                 | 1 |
| <i>circICA1</i> | miR-940/6808-5p/6893-5p            | 3 |
| <i>circICA1</i> | miR-942-5p                         | 1 |
| <i>circICA1</i> | miR-944                            | 3 |
| <i>circICA1</i> | miR-9500                           | 4 |
| <i>circICA1</i> | miR-96-3p                          | 1 |
| <i>circICA1</i> | miR-96-5p/1271-5p                  | 1 |
| <i>circICA1</i> | miR-7706                           | 1 |
| <i>circIQCK</i> | miR-1178-3p                        | 1 |
| <i>circIQCK</i> | miR-1179                           | 2 |
| <i>circIQCK</i> | miR-1197                           | 3 |
| <i>circIQCK</i> | miR-1224-5p                        | 2 |
| <i>circIQCK</i> | miR-1237-3p                        | 1 |
| <i>circIQCK</i> | miR-1248                           | 1 |
| <i>circIQCK</i> | miR-1266-3p                        | 1 |
| <i>circIQCK</i> | miR-127-5p                         | 3 |
| <i>circIQCK</i> | miR-129-5p                         | 2 |
| <i>circIQCK</i> | miR-1299                           | 1 |
| <i>circIQCK</i> | miR-1304-5p                        | 2 |
| <i>circIQCK</i> | miR-149-3p/4728-5p/6785-5p/6883-5p | 1 |
| <i>circIQCK</i> | miR-1537-3p                        | 2 |
| <i>circIQCK</i> | miR-1976                           | 1 |

|                 |                          |   |
|-----------------|--------------------------|---|
| <i>circIQCK</i> | miR-203a-3p.1            | 2 |
| <i>circIQCK</i> | miR-219-5p               | 2 |
| <i>circIQCK</i> | miR-2467-5p              | 1 |
| <i>circIQCK</i> | miR-2681-3p              | 2 |
| <i>circIQCK</i> | miR-27-3p                | 2 |
| <i>circIQCK</i> | miR-29b-1-5p             | 1 |
| <i>circIQCK</i> | miR-302c-3p.2/520-3p     | 2 |
| <i>circIQCK</i> | miR-3121-3p              | 2 |
| <i>circIQCK</i> | miR-3130-3p              | 2 |
| <i>circIQCK</i> | miR-3148                 | 2 |
| <i>circIQCK</i> | miR-3153/6733-5p/6739-5p | 2 |
| <i>circIQCK</i> | miR-3177-5p              | 2 |
| <i>circIQCK</i> | miR-3182                 | 1 |
| <i>circIQCK</i> | miR-3188                 | 1 |
| <i>circIQCK</i> | miR-3194-3p              | 2 |
| <i>circIQCK</i> | miR-330-3p.2             | 2 |
| <i>circIQCK</i> | miR-3612                 | 1 |
| <i>circIQCK</i> | miR-362-5p/500b-5p       | 1 |
| <i>circIQCK</i> | miR-3620-3p              | 1 |
| <i>circIQCK</i> | miR-3653-5p              | 1 |
| <i>circIQCK</i> | miR-380-5p/563           | 2 |
| <i>circIQCK</i> | miR-383-5p.2             | 2 |
| <i>circIQCK</i> | miR-3915                 | 2 |
| <i>circIQCK</i> | miR-3929/4419b/4478      | 1 |
| <i>circIQCK</i> | miR-3934-3p              | 1 |
| <i>circIQCK</i> | miR-3940-5p/4507         | 2 |
| <i>circIQCK</i> | miR-3975                 | 1 |
| <i>circIQCK</i> | miR-3978                 | 1 |
| <i>circIQCK</i> | miR-4261                 | 2 |
| <i>circIQCK</i> | miR-4268                 | 2 |
| <i>circIQCK</i> | miR-4307                 | 2 |
| <i>circIQCK</i> | miR-4325                 | 2 |
| <i>circIQCK</i> | miR-4422                 | 2 |
| <i>circIQCK</i> | miR-4438                 | 2 |
| <i>circIQCK</i> | miR-4445-5p              | 2 |
| <i>circIQCK</i> | miR-4448                 | 2 |
| <i>circIQCK</i> | miR-4455                 | 2 |
| <i>circIQCK</i> | miR-4473                 | 2 |

|                 |                  |   |
|-----------------|------------------|---|
| <i>circIQCK</i> | miR-4475         | 1 |
| <i>circIQCK</i> | miR-4506         | 2 |
| <i>circIQCK</i> | miR-4666a-5p     | 1 |
| <i>circIQCK</i> | miR-4668-5p      | 2 |
| <i>circIQCK</i> | miR-4671-3p      | 2 |
| <i>circIQCK</i> | miR-4689/6858-5p | 2 |
| <i>circIQCK</i> | miR-4694-3p      | 2 |
| <i>circIQCK</i> | miR-4724-5p      | 2 |
| <i>circIQCK</i> | miR-4739         | 1 |
| <i>circIQCK</i> | miR-4751         | 2 |
| <i>circIQCK</i> | miR-4782-5p/5706 | 1 |
| <i>circIQCK</i> | miR-4786-3p      | 2 |
| <i>circIQCK</i> | miR-4793-3p      | 2 |
| <i>circIQCK</i> | miR-484/3155     | 2 |
| <i>circIQCK</i> | miR-485-5p       | 1 |
| <i>circIQCK</i> | miR-5004-5p      | 2 |
| <i>circIQCK</i> | miR-501-5p       | 1 |
| <i>circIQCK</i> | miR-508-3p       | 2 |
| <i>circIQCK</i> | miR-512-3p       | 2 |
| <i>circIQCK</i> | miR-513a-5p      | 2 |
| <i>circIQCK</i> | miR-516b-5p      | 1 |
| <i>circIQCK</i> | miR-522-3p       | 2 |
| <i>circIQCK</i> | miR-526b-5p      | 2 |
| <i>circIQCK</i> | miR-539-3p       | 1 |
| <i>circIQCK</i> | miR-548e-5p      | 3 |
| <i>circIQCK</i> | miR-5681a        | 1 |
| <i>circIQCK</i> | miR-5691         | 2 |
| <i>circIQCK</i> | miR-5694         | 2 |
| <i>circIQCK</i> | miR-604          | 1 |
| <i>circIQCK</i> | miR-6083         | 1 |
| <i>circIQCK</i> | miR-609          | 2 |
| <i>circIQCK</i> | miR-6124         | 2 |
| <i>circIQCK</i> | miR-6128         | 1 |
| <i>circIQCK</i> | miR-6728-3p      | 2 |
| <i>circIQCK</i> | miR-6730-5p      | 1 |
| <i>circIQCK</i> | miR-6760-5p      | 1 |
| <i>circIQCK</i> | miR-6762-3p      | 1 |
| <i>circIQCK</i> | miR-6772-5p      | 2 |

|                 |              |   |
|-----------------|--------------|---|
| <i>circIQCK</i> | miR-6787-3p  | 1 |
| <i>circIQCK</i> | miR-6799-5p  | 1 |
| <i>circIQCK</i> | miR-6823-5p  | 2 |
| <i>circIQCK</i> | miR-6827-5p  | 2 |
| <i>circIQCK</i> | miR-6839-3p  | 2 |
| <i>circIQCK</i> | miR-6868-3p  | 1 |
| <i>circIQCK</i> | miR-6871-5p  | 2 |
| <i>circIQCK</i> | miR-7106-5p  | 1 |
| <i>circIQCK</i> | miR-758-5p   | 2 |
| <i>circIQCK</i> | miR-764      | 2 |
| <i>circIQCK</i> | miR-767-3p   | 1 |
| <i>circIQCK</i> | miR-7703     | 2 |
| <i>circIQCK</i> | miR-7843-3p  | 3 |
| <i>circIQCK</i> | miR-7855-5p  | 3 |
| <i>circIQCK</i> | miR-8060     | 2 |
| <i>circIQCK</i> | miR-96-3p    | 2 |
| <i>circIQCK</i> | miR-10-5p    | 1 |
| <i>circIQCK</i> | miR-106a-3p  | 1 |
| <i>circIQCK</i> | miR-1180-3p  | 1 |
| <i>circIQCK</i> | miR-1224-3p  | 1 |
| <i>circIQCK</i> | miR-1238-3p  | 1 |
| <i>circIQCK</i> | miR-125-5p   | 1 |
| <i>circIQCK</i> | miR-1250-3p  | 2 |
| <i>circIQCK</i> | miR-1273g-5p | 1 |
| <i>circIQCK</i> | miR-1281     | 1 |
| <i>circIQCK</i> | miR-1323     | 1 |
| <i>circIQCK</i> | miR-136-5p   | 1 |
| <i>circIQCK</i> | miR-140-5p   | 1 |
| <i>circIQCK</i> | miR-146-5p   | 1 |
| <i>circIQCK</i> | miR-152-5p   | 1 |
| <i>circIQCK</i> | miR-181-5p   | 1 |
| <i>circIQCK</i> | miR-182-3p   | 1 |
| <i>circIQCK</i> | miR-183-5p.1 | 1 |
| <i>circIQCK</i> | miR-185-3p   | 1 |
| <i>circIQCK</i> | miR-1914-5p  | 1 |
| <i>circIQCK</i> | miR-193-3p   | 1 |
| <i>circIQCK</i> | miR-203a-5p  | 1 |
| <i>circIQCK</i> | miR-2053     | 1 |

|                 |                                              |   |
|-----------------|----------------------------------------------|---|
| <i>circIQCK</i> | miR-218-1-3p                                 | 1 |
| <i>circIQCK</i> | miR-218-2-3p                                 | 1 |
| <i>circIQCK</i> | miR-2276-3p                                  | 1 |
| <i>circIQCK</i> | miR-23-3p                                    | 1 |
| <i>circIQCK</i> | miR-297                                      | 1 |
| <i>circIQCK</i> | miR-298                                      | 1 |
| <i>circIQCK</i> | miR-299-3p                                   | 1 |
| <i>circIQCK</i> | miR-302a-5p                                  | 2 |
| <i>circIQCK</i> | miR-30b-3p/1273h-5p/3689-3p/6779-5p/6780a-5p | 1 |
| <i>circIQCK</i> | miR-30c-3p/6788-5p                           | 1 |
| <i>circIQCK</i> | miR-3122/3913-5p                             | 1 |
| <i>circIQCK</i> | miR-3163                                     | 2 |
| <i>circIQCK</i> | miR-3189-5p                                  | 1 |
| <i>circIQCK</i> | miR-339-5p                                   | 1 |
| <i>circIQCK</i> | miR-33a-3p                                   | 1 |
| <i>circIQCK</i> | miR-340-5p                                   | 1 |
| <i>circIQCK</i> | miR-342-3p                                   | 1 |
| <i>circIQCK</i> | miR-3675-3p                                  | 1 |
| <i>circIQCK</i> | miR-3680-5p                                  | 1 |
| <i>circIQCK</i> | miR-371-5p                                   | 1 |
| <i>circIQCK</i> | miR-371b-5p/373-5p/616-5p                    | 1 |
| <i>circIQCK</i> | miR-372-5p                                   | 1 |
| <i>circIQCK</i> | miR-375                                      | 1 |
| <i>circIQCK</i> | miR-3924                                     | 1 |
| <i>circIQCK</i> | miR-3943                                     | 1 |
| <i>circIQCK</i> | miR-411-3p                                   | 1 |
| <i>circIQCK</i> | miR-4276                                     | 1 |
| <i>circIQCK</i> | miR-4287/4685-3p                             | 1 |
| <i>circIQCK</i> | miR-4323                                     | 1 |
| <i>circIQCK</i> | miR-4324                                     | 1 |
| <i>circIQCK</i> | miR-4426/4647/4662b                          | 2 |
| <i>circIQCK</i> | miR-4434/4516/5703                           | 2 |
| <i>circIQCK</i> | miR-4469                                     | 1 |
| <i>circIQCK</i> | miR-4485-5p                                  | 1 |
| <i>circIQCK</i> | miR-4491/4657                                | 1 |
| <i>circIQCK</i> | miR-4496                                     | 1 |
| <i>circIQCK</i> | miR-4497                                     | 1 |
| <i>circIQCK</i> | miR-450a-1-3p                                | 1 |

|                 |                       |   |
|-----------------|-----------------------|---|
| <i>circIQCK</i> | miR-451               | 1 |
| <i>circIQCK</i> | miR-4511              | 1 |
| <i>circIQCK</i> | miR-4642              | 1 |
| <i>circIQCK</i> | miR-4643              | 1 |
| <i>circIQCK</i> | miR-4649-3p           | 1 |
| <i>circIQCK</i> | miR-4659a-3p/4659b-3p | 1 |
| <i>circIQCK</i> | miR-4662-5p           | 1 |
| <i>circIQCK</i> | miR-4662a-3p          | 1 |
| <i>circIQCK</i> | miR-4664-3p           | 1 |
| <i>circIQCK</i> | miR-4690-5p           | 1 |
| <i>circIQCK</i> | miR-4700-3p           | 1 |
| <i>circIQCK</i> | miR-4713-5p           | 1 |
| <i>circIQCK</i> | miR-4717-3p           | 1 |
| <i>circIQCK</i> | miR-4732-3p           | 1 |
| <i>circIQCK</i> | miR-4747-5p/5196-5p   | 1 |
| <i>circIQCK</i> | miR-4753-3p           | 2 |
| <i>circIQCK</i> | miR-4758-3p           | 1 |
| <i>circIQCK</i> | miR-4772-3p           | 1 |
| <i>circIQCK</i> | miR-4773              | 3 |
| <i>circIQCK</i> | miR-4777-3p           | 1 |
| <i>circIQCK</i> | miR-4789-3p           | 1 |
| <i>circIQCK</i> | miR-4790-5p           | 1 |
| <i>circIQCK</i> | miR-4795-3p           | 1 |
| <i>circIQCK</i> | miR-4798-3p           | 1 |
| <i>circIQCK</i> | miR-488-3p            | 1 |
| <i>circIQCK</i> | miR-504-3p            | 1 |
| <i>circIQCK</i> | miR-504-5p.1          | 1 |
| <i>circIQCK</i> | miR-5094              | 1 |
| <i>circIQCK</i> | miR-5190              | 1 |
| <i>circIQCK</i> | miR-543               | 1 |
| <i>circIQCK</i> | miR-544a              | 1 |
| <i>circIQCK</i> | miR-544b              | 1 |
| <i>circIQCK</i> | miR-548at-5p          | 1 |
| <i>circIQCK</i> | miR-548b-3p           | 1 |
| <i>circIQCK</i> | miR-548c-3p           | 2 |
| <i>circIQCK</i> | miR-550b-3p           | 1 |
| <i>circIQCK</i> | miR-551b-5p           | 2 |
| <i>circIQCK</i> | miR-552-5p            | 1 |

|                 |                     |   |
|-----------------|---------------------|---|
| <i>circIQCK</i> | miR-556-3p          | 1 |
| <i>circIQCK</i> | miR-5591-3p         | 1 |
| <i>circIQCK</i> | miR-561-3p          | 1 |
| <i>circIQCK</i> | miR-567             | 1 |
| <i>circIQCK</i> | miR-5692a           | 2 |
| <i>circIQCK</i> | miR-5699-5p         | 1 |
| <i>circIQCK</i> | miR-577             | 1 |
| <i>circIQCK</i> | miR-589-3p          | 1 |
| <i>circIQCK</i> | miR-589-5p          | 1 |
| <i>circIQCK</i> | miR-593-3p          | 1 |
| <i>circIQCK</i> | miR-597-3p          | 1 |
| <i>circIQCK</i> | miR-6069            | 1 |
| <i>circIQCK</i> | miR-6074            | 1 |
| <i>circIQCK</i> | miR-6084            | 1 |
| <i>circIQCK</i> | miR-6165            | 1 |
| <i>circIQCK</i> | miR-621             | 1 |
| <i>circIQCK</i> | miR-6504-3p         | 1 |
| <i>circIQCK</i> | miR-6510-5p         | 1 |
| <i>circIQCK</i> | miR-6513-5p         | 1 |
| <i>circIQCK</i> | miR-654-3p          | 1 |
| <i>circIQCK</i> | miR-670-3p          | 1 |
| <i>circIQCK</i> | miR-670-5p          | 1 |
| <i>circIQCK</i> | miR-671-5p          | 1 |
| <i>circIQCK</i> | miR-6722-5p         | 1 |
| <i>circIQCK</i> | miR-6731-5p/8085    | 1 |
| <i>circIQCK</i> | miR-6738-3p         | 1 |
| <i>circIQCK</i> | miR-675-3p          | 1 |
| <i>circIQCK</i> | miR-6769a-3p        | 1 |
| <i>circIQCK</i> | miR-6778-3p         | 1 |
| <i>circIQCK</i> | miR-6780a-3p        | 1 |
| <i>circIQCK</i> | miR-6791-3p/6829-3p | 1 |
| <i>circIQCK</i> | miR-6793-3p         | 1 |
| <i>circIQCK</i> | miR-6816-3p         | 1 |
| <i>circIQCK</i> | miR-6817-3p         | 1 |
| <i>circIQCK</i> | miR-6818-3p         | 1 |
| <i>circIQCK</i> | miR-6828-5p         | 1 |
| <i>circIQCK</i> | miR-6843-3p/6848-3p | 1 |
| <i>circIQCK</i> | miR-6844            | 2 |



|                 |                |   |
|-----------------|----------------|---|
| <i>circIQCK</i> | miR-6865-3p    | 1 |
| <i>circIQCK</i> | miR-6867-3p    | 1 |
| <i>circIQCK</i> | miR-6873-3p    | 1 |
| <i>circIQCK</i> | miR-6875-3p    | 1 |
| <i>circIQCK</i> | miR-6878-5p    | 1 |
| <i>circIQCK</i> | miR-6881-3p    | 1 |
| <i>circIQCK</i> | miR-6888-3p    | 1 |
| <i>circIQCK</i> | miR-6895-3p    | 1 |
| <i>circIQCK</i> | miR-7-3p       | 1 |
| <i>circIQCK</i> | miR-7110-3p    | 1 |
| <i>circIQCK</i> | miR-7111-3p    | 1 |
| <i>circIQCK</i> | miR-7113-3p    | 1 |
| <i>circIQCK</i> | miR-7114-5p    | 1 |
| <i>circIQCK</i> | miR-7162-3p    | 1 |
| <i>circIQCK</i> | miR-8080       | 1 |
| <i>circIQCK</i> | miR-873-5p.1   | 1 |
| <i>circIQCK</i> | miR-875-5p     | 1 |
| <i>circIQCK</i> | miR-887-5p     | 1 |
| <i>circIQCK</i> | miR-9-5p       | 2 |
| <i>circIQCK</i> | miR-944        | 1 |
| <i>circIQCK</i> | miR-6750-3p    | 1 |
| <i>circIQCK</i> | miR-888-5p     | 1 |
| <i>circIQCK</i> | miR-891b       | 1 |
| <i>circIQCK</i> | miR-1-3p/206   | 2 |
| <i>circIQCK</i> | miR-105-5p     | 2 |
| <i>circIQCK</i> | miR-1255b-2-3p | 2 |
| <i>circIQCK</i> | miR-1257       | 2 |
| <i>circIQCK</i> | miR-1267       | 1 |
| <i>circIQCK</i> | miR-1270       | 2 |
| <i>circIQCK</i> | miR-1272       | 1 |
| <i>circIQCK</i> | miR-1273e      | 1 |
| <i>circIQCK</i> | miR-1290       | 2 |
| <i>circIQCK</i> | miR-130b-5p    | 2 |
| <i>circIQCK</i> | miR-1322       | 1 |
| <i>circIQCK</i> | miR-1324       | 1 |
| <i>circIQCK</i> | miR-133a-5p    | 1 |
| <i>circIQCK</i> | miR-135-5p     | 2 |
| <i>circIQCK</i> | miR-138-5p     | 1 |

|                 |                           |   |
|-----------------|---------------------------|---|
| <i>circIQCK</i> | miR-145-3p                | 1 |
| <i>circIQCK</i> | miR-146a-3p               | 2 |
| <i>circIQCK</i> | miR-181-3p/4420           | 1 |
| <i>circIQCK</i> | miR-183-3p                | 2 |
| <i>circIQCK</i> | miR-18a-3p                | 2 |
| <i>circIQCK</i> | miR-2116-5p               | 1 |
| <i>circIQCK</i> | miR-22-5p                 | 1 |
| <i>circIQCK</i> | miR-223-3p                | 1 |
| <i>circIQCK</i> | miR-224-5p                | 1 |
| <i>circIQCK</i> | miR-2276-5p               | 2 |
| <i>circIQCK</i> | miR-26-3p                 | 1 |
| <i>circIQCK</i> | miR-26-5p                 | 1 |
| <i>circIQCK</i> | miR-302c-5p               | 1 |
| <i>circIQCK</i> | miR-3074-5p               | 1 |
| <i>circIQCK</i> | miR-3149                  | 2 |
| <i>circIQCK</i> | miR-3157-3p               | 2 |
| <i>circIQCK</i> | miR-323b-5p/410-5p/494-5p | 1 |
| <i>circIQCK</i> | miR-324-3p/1913           | 2 |
| <i>circIQCK</i> | miR-331-3p                | 2 |
| <i>circIQCK</i> | miR-338-5p                | 1 |
| <i>circIQCK</i> | miR-34b-3p                | 1 |
| <i>circIQCK</i> | miR-34c-3p                | 1 |
| <i>circIQCK</i> | miR-3611                  | 2 |
| <i>circIQCK</i> | miR-3613-5p               | 1 |
| <i>circIQCK</i> | miR-3652/4430             | 1 |
| <i>circIQCK</i> | miR-3663-5p               | 1 |
| <i>circIQCK</i> | miR-367-5p                | 1 |
| <i>circIQCK</i> | miR-3688-3p               | 2 |
| <i>circIQCK</i> | miR-4264                  | 2 |
| <i>circIQCK</i> | miR-4269/6715b-5p         | 2 |
| <i>circIQCK</i> | miR-4272                  | 1 |
| <i>circIQCK</i> | miR-4282                  | 2 |
| <i>circIQCK</i> | miR-4290                  | 2 |
| <i>circIQCK</i> | miR-4327                  | 1 |
| <i>circIQCK</i> | miR-433-3p                | 1 |
| <i>circIQCK</i> | miR-4427                  | 2 |
| <i>circIQCK</i> | miR-4452                  | 2 |
| <i>circIQCK</i> | miR-4462                  | 1 |

|                 |                       |   |
|-----------------|-----------------------|---|
| <i>circIQCK</i> | miR-4505/5787         | 1 |
| <i>circIQCK</i> | miR-4513/6855-3p      | 1 |
| <i>circIQCK</i> | miR-4514/4692         | 2 |
| <i>circIQCK</i> | miR-4531              | 2 |
| <i>circIQCK</i> | miR-4652-3p           | 2 |
| <i>circIQCK</i> | miR-4659a-5p/4659b-5p | 1 |
| <i>circIQCK</i> | miR-4661-3p           | 1 |
| <i>circIQCK</i> | miR-4668-3p           | 2 |
| <i>circIQCK</i> | miR-4677-3p           | 2 |
| <i>circIQCK</i> | miR-4679              | 2 |
| <i>circIQCK</i> | miR-4680-3p           | 2 |
| <i>circIQCK</i> | miR-4691-5p/6792-3p   | 2 |
| <i>circIQCK</i> | miR-4696              | 1 |
| <i>circIQCK</i> | miR-4697-3p           | 1 |
| <i>circIQCK</i> | miR-4704-3p           | 2 |
| <i>circIQCK</i> | miR-4719              | 2 |
| <i>circIQCK</i> | miR-4722-3p/6727-3p   | 2 |
| <i>circIQCK</i> | miR-4742-5p           | 2 |
| <i>circIQCK</i> | miR-4743-3p           | 2 |
| <i>circIQCK</i> | miR-4760-3p           | 1 |
| <i>circIQCK</i> | miR-4778-5p           | 3 |
| <i>circIQCK</i> | miR-4790-3p           | 4 |
| <i>circIQCK</i> | miR-4797-3p           | 2 |
| <i>circIQCK</i> | miR-4802-5p           | 2 |
| <i>circIQCK</i> | miR-498               | 1 |
| <i>circIQCK</i> | miR-5002-5p           | 1 |
| <i>circIQCK</i> | miR-5004-3p           | 2 |
| <i>circIQCK</i> | miR-512-5p            | 2 |
| <i>circIQCK</i> | miR-514a-3p           | 1 |
| <i>circIQCK</i> | miR-5187-3p           | 2 |
| <i>circIQCK</i> | miR-518a-5p/527       | 1 |
| <i>circIQCK</i> | miR-5197-5p           | 2 |
| <i>circIQCK</i> | miR-539-5p            | 2 |
| <i>circIQCK</i> | miR-548aw             | 1 |
| <i>circIQCK</i> | miR-5571-5p           | 3 |
| <i>circIQCK</i> | miR-5585-3p           | 1 |
| <i>circIQCK</i> | miR-5587-5p           | 1 |
| <i>circIQCK</i> | miR-5590-5p           | 1 |

|                 |                     |   |
|-----------------|---------------------|---|
| <i>circIQCK</i> | miR-568             | 2 |
| <i>circIQCK</i> | miR-570-3p          | 1 |
| <i>circIQCK</i> | miR-6071            | 1 |
| <i>circIQCK</i> | miR-6131            | 1 |
| <i>circIQCK</i> | miR-627-3p          | 1 |
| <i>circIQCK</i> | miR-643             | 1 |
| <i>circIQCK</i> | miR-647             | 1 |
| <i>circIQCK</i> | miR-6505-5p         | 2 |
| <i>circIQCK</i> | miR-6507-5p         | 1 |
| <i>circIQCK</i> | miR-651-5p          | 1 |
| <i>circIQCK</i> | miR-6514-5p         | 2 |
| <i>circIQCK</i> | miR-653-3p          | 1 |
| <i>circIQCK</i> | miR-659-3p          | 2 |
| <i>circIQCK</i> | miR-6731-3p         | 1 |
| <i>circIQCK</i> | miR-6743-3p         | 2 |
| <i>circIQCK</i> | miR-6746-3p         | 2 |
| <i>circIQCK</i> | miR-6747-3p         | 2 |
| <i>circIQCK</i> | miR-6749-3p         | 2 |
| <i>circIQCK</i> | miR-6752-3p         | 2 |
| <i>circIQCK</i> | miR-6776-3p         | 2 |
| <i>circIQCK</i> | miR-6777-3p         | 2 |
| <i>circIQCK</i> | miR-6792-5p         | 1 |
| <i>circIQCK</i> | miR-6801-3p/6810-3p | 2 |
| <i>circIQCK</i> | miR-6826-3p         | 2 |
| <i>circIQCK</i> | miR-6828-3p         | 1 |
| <i>circIQCK</i> | miR-6842-3p         | 1 |
| <i>circIQCK</i> | miR-6857-3p         | 1 |
| <i>circIQCK</i> | miR-6892-3p         | 2 |
| <i>circIQCK</i> | miR-7106-3p         | 2 |
| <i>circIQCK</i> | miR-7152-3p         | 1 |
| <i>circIQCK</i> | miR-7152-5p         | 1 |
| <i>circIQCK</i> | miR-7154-5p         | 1 |
| <i>circIQCK</i> | miR-744-3p          | 3 |
| <i>circIQCK</i> | miR-7850-5p         | 2 |
| <i>circIQCK</i> | miR-8057            | 2 |
| <i>circIQCK</i> | miR-874-3p          | 2 |
| <i>circIQCK</i> | miR-876-5p          | 2 |
| <i>circIQCK</i> | miR-889-5p          | 2 |

|                    |                     |   |
|--------------------|---------------------|---|
| <i>circIQCK</i>    | miR-95-5p           | 1 |
| <i>circKATNAL2</i> | miR-10-5p           | 1 |
| <i>circKATNAL2</i> | miR-1178-5p         | 4 |
| <i>circKATNAL2</i> | miR-1182            | 4 |
| <i>circKATNAL2</i> | miR-1208            | 4 |
| <i>circKATNAL2</i> | miR-1237-3p         | 3 |
| <i>circKATNAL2</i> | miR-1238-3p         | 1 |
| <i>circKATNAL2</i> | miR-1244            | 2 |
| <i>circKATNAL2</i> | miR-1248            | 3 |
| <i>circKATNAL2</i> | miR-1253            | 2 |
| <i>circKATNAL2</i> | miR-1257            | 5 |
| <i>circKATNAL2</i> | miR-1266-3p         | 1 |
| <i>circKATNAL2</i> | miR-1292-3p         | 4 |
| <i>circKATNAL2</i> | miR-1301-5p/6502-5p | 1 |
| <i>circKATNAL2</i> | miR-1306-3p         | 1 |
| <i>circKATNAL2</i> | miR-1324            | 4 |
| <i>circKATNAL2</i> | miR-136-5p          | 4 |
| <i>circKATNAL2</i> | miR-138-2-3p        | 1 |
| <i>circKATNAL2</i> | miR-146a-3p         | 2 |
| <i>circKATNAL2</i> | miR-1471            | 4 |
| <i>circKATNAL2</i> | miR-1587/3620-5p    | 1 |
| <i>circKATNAL2</i> | miR-183-3p          | 4 |
| <i>circKATNAL2</i> | miR-185-3p          | 1 |
| <i>circKATNAL2</i> | miR-188-5p          | 1 |
| <i>circKATNAL2</i> | miR-193a-5p         | 4 |
| <i>circKATNAL2</i> | miR-204-5p/211-5p   | 3 |
| <i>circKATNAL2</i> | miR-205-3p          | 4 |
| <i>circKATNAL2</i> | miR-205-5p          | 2 |
| <i>circKATNAL2</i> | miR-2053            | 1 |
| <i>circKATNAL2</i> | miR-2115-3p         | 4 |
| <i>circKATNAL2</i> | miR-2115-5p         | 4 |
| <i>circKATNAL2</i> | miR-2117            | 1 |
| <i>circKATNAL2</i> | miR-218-5p          | 4 |
| <i>circKATNAL2</i> | miR-223-3p          | 2 |
| <i>circKATNAL2</i> | miR-26-3p           | 1 |
| <i>circKATNAL2</i> | miR-26b-3p          | 1 |
| <i>circKATNAL2</i> | miR-30-3p           | 4 |
| <i>circKATNAL2</i> | miR-3117-3p         | 4 |

|                    |                       |   |
|--------------------|-----------------------|---|
| <i>circKATNAL2</i> | miR-3117-5p           | 4 |
| <i>circKATNAL2</i> | miR-3120-5p           | 4 |
| <i>circKATNAL2</i> | miR-3123              | 2 |
| <i>circKATNAL2</i> | miR-3124-3p           | 1 |
| <i>circKATNAL2</i> | miR-3127-5p           | 4 |
| <i>circKATNAL2</i> | miR-3148              | 1 |
| <i>circKATNAL2</i> | miR-3150a-5p/3150b-5p | 1 |
| <i>circKATNAL2</i> | miR-3152-3p           | 1 |
| <i>circKATNAL2</i> | miR-3154              | 2 |
| <i>circKATNAL2</i> | miR-3179              | 2 |
| <i>circKATNAL2</i> | miR-3182              | 4 |
| <i>circKATNAL2</i> | miR-3190-3p           | 1 |
| <i>circKATNAL2</i> | miR-320               | 4 |
| <i>circKATNAL2</i> | miR-335-3p            | 1 |
| <i>circKATNAL2</i> | miR-337-3p            | 1 |
| <i>circKATNAL2</i> | miR-339-5p            | 2 |
| <i>circKATNAL2</i> | miR-345-5p            | 1 |
| <i>circKATNAL2</i> | miR-3607-5p           | 1 |
| <i>circKATNAL2</i> | miR-3611              | 1 |
| <i>circKATNAL2</i> | miR-3613-3p           | 1 |
| <i>circKATNAL2</i> | miR-378g              | 2 |
| <i>circKATNAL2</i> | miR-381-3p            | 1 |
| <i>circKATNAL2</i> | miR-382-3p            | 1 |
| <i>circKATNAL2</i> | miR-3914              | 1 |
| <i>circKATNAL2</i> | miR-3923              | 1 |
| <i>circKATNAL2</i> | miR-3925-5p           | 2 |
| <i>circKATNAL2</i> | miR-3978              | 1 |
| <i>circKATNAL2</i> | miR-412-5p            | 1 |
| <i>circKATNAL2</i> | miR-4273/7156-5p      | 1 |
| <i>circKATNAL2</i> | miR-4287/4685-3p      | 1 |
| <i>circKATNAL2</i> | miR-4318              | 4 |
| <i>circKATNAL2</i> | miR-4434/4516/5703    | 2 |
| <i>circKATNAL2</i> | miR-4446-5p           | 1 |
| <i>circKATNAL2</i> | miR-4452              | 4 |
| <i>circKATNAL2</i> | miR-4469              | 1 |
| <i>circKATNAL2</i> | miR-4474-5p           | 1 |
| <i>circKATNAL2</i> | miR-4475              | 2 |
| <i>circKATNAL2</i> | miR-4486              | 2 |

|                    |                             |   |
|--------------------|-----------------------------|---|
| <i>circKATNAL2</i> | miR-4490                    | 4 |
| <i>circKATNAL2</i> | miR-4496                    | 4 |
| <i>circKATNAL2</i> | miR-449c-3p                 | 4 |
| <i>circKATNAL2</i> | miR-4502                    | 4 |
| <i>circKATNAL2</i> | miR-4527/6503-5p            | 4 |
| <i>circKATNAL2</i> | miR-4528                    | 1 |
| <i>circKATNAL2</i> | miR-4652-3p                 | 3 |
| <i>circKATNAL2</i> | miR-4656                    | 1 |
| <i>circKATNAL2</i> | miR-4659a-3p/4659b-3p       | 4 |
| <i>circKATNAL2</i> | miR-4666a-3p                | 1 |
| <i>circKATNAL2</i> | miR-4674                    | 1 |
| <i>circKATNAL2</i> | miR-4675/4741               | 1 |
| <i>circKATNAL2</i> | miR-4677-3p                 | 2 |
| <i>circKATNAL2</i> | miR-4677-5p                 | 1 |
| <i>circKATNAL2</i> | miR-4679                    | 2 |
| <i>circKATNAL2</i> | miR-4697-3p                 | 2 |
| <i>circKATNAL2</i> | miR-4713-5p                 | 1 |
| <i>circKATNAL2</i> | miR-4725-5p                 | 3 |
| <i>circKATNAL2</i> | miR-4739                    | 2 |
| <i>circKATNAL2</i> | miR-4743-3p                 | 3 |
| <i>circKATNAL2</i> | miR-4750-3p                 | 1 |
| <i>circKATNAL2</i> | miR-4753-3p                 | 1 |
| <i>circKATNAL2</i> | miR-4755-5p/5006-3p         | 3 |
| <i>circKATNAL2</i> | miR-4774-5p                 | 4 |
| <i>circKATNAL2</i> | miR-4778-3p                 | 3 |
| <i>circKATNAL2</i> | miR-4790-5p                 | 2 |
| <i>circKATNAL2</i> | miR-4802-3p                 | 1 |
| <i>circKATNAL2</i> | miR-4804-5p                 | 1 |
| <i>circKATNAL2</i> | miR-490-5p                  | 1 |
| <i>circKATNAL2</i> | miR-5008-3p/6737-3p/7157-3p | 4 |
| <i>circKATNAL2</i> | miR-500a-5p                 | 1 |
| <i>circKATNAL2</i> | miR-504-3p                  | 2 |
| <i>circKATNAL2</i> | miR-504-5p.1                | 1 |
| <i>circKATNAL2</i> | miR-5088-3p                 | 3 |
| <i>circKATNAL2</i> | miR-511-3p                  | 1 |
| <i>circKATNAL2</i> | miR-511-5p                  | 4 |
| <i>circKATNAL2</i> | miR-513b-3p                 | 1 |
| <i>circKATNAL2</i> | miR-516a-3p/516b-3p/7162-5p | 4 |

|                    |                                                                  |   |
|--------------------|------------------------------------------------------------------|---|
| <i>circKATNAL2</i> | miR-520g-5p                                                      | 2 |
| <i>circKATNAL2</i> | miR-524-5p                                                       | 2 |
| <i>circKATNAL2</i> | miR-539-5p                                                       | 2 |
| <i>circKATNAL2</i> | miR-548ac/548bb-3p/548d-3p/548h-3p/548z                          |   |
| <i>circKATNAL2</i> | miR-548aq-3p/548am-3p/548aj-3p/548ah-3p/548ae-3p/548j-3p/548x-3p |   |
| <i>circKATNAL2</i> | miR-548av-5p/548k/8054                                           | 2 |
| <i>circKATNAL2</i> | miR-548ay-5p/548au-5p/548as-5p/548ar-3p/548aq-5p/548ap-5p/548am- |   |
| <i>circKATNAL2</i> | miR-548az-5p/548t-5p                                             | 2 |
| <i>circKATNAL2</i> | miR-548c-3p                                                      | 1 |
| <i>circKATNAL2</i> | miR-548g-3p                                                      | 1 |
| <i>circKATNAL2</i> | miR-548l                                                         | 2 |
| <i>circKATNAL2</i> | miR-548n                                                         | 2 |
| <i>circKATNAL2</i> | miR-554                                                          | 1 |
| <i>circKATNAL2</i> | miR-562                                                          | 2 |
| <i>circKATNAL2</i> | miR-5691                                                         | 1 |
| <i>circKATNAL2</i> | miR-593-3p                                                       | 1 |
| <i>circKATNAL2</i> | miR-6071                                                         | 2 |
| <i>circKATNAL2</i> | miR-6078                                                         | 4 |
| <i>circKATNAL2</i> | miR-612/1285-3p/3187-5p/5189-5p/6860                             | 2 |
| <i>circKATNAL2</i> | miR-6124                                                         | 1 |
| <i>circKATNAL2</i> | miR-623                                                          | 3 |
| <i>circKATNAL2</i> | miR-629-3p                                                       | 1 |
| <i>circKATNAL2</i> | miR-651-3p                                                       | 1 |
| <i>circKATNAL2</i> | miR-6516-3p                                                      | 1 |
| <i>circKATNAL2</i> | miR-654-3p                                                       | 1 |
| <i>circKATNAL2</i> | miR-668-5p                                                       | 4 |
| <i>circKATNAL2</i> | miR-670-3p                                                       | 1 |
| <i>circKATNAL2</i> | miR-6720-3p                                                      | 4 |
| <i>circKATNAL2</i> | miR-6728-3p                                                      | 2 |
| <i>circKATNAL2</i> | miR-6731-3p                                                      | 1 |
| <i>circKATNAL2</i> | miR-6731-5p/8085                                                 | 2 |
| <i>circKATNAL2</i> | miR-6740-3p                                                      | 6 |
| <i>circKATNAL2</i> | miR-6753-3p/7107-3p                                              | 4 |
| <i>circKATNAL2</i> | miR-6757-3p                                                      | 4 |
| <i>circKATNAL2</i> | miR-6758-3p                                                      | 1 |
| <i>circKATNAL2</i> | miR-676-5p                                                       | 3 |
| <i>circKATNAL2</i> | miR-6760-3p                                                      | 4 |
| <i>circKATNAL2</i> | miR-6760-5p                                                      | 2 |



|                    |                           |   |
|--------------------|---------------------------|---|
| <i>circKATNAL2</i> | miR-6770-5p               | 2 |
| <i>circKATNAL2</i> | miR-6780a-3p              | 1 |
| <i>circKATNAL2</i> | miR-6796-3p               | 4 |
| <i>circKATNAL2</i> | miR-6817-3p               | 1 |
| <i>circKATNAL2</i> | miR-6818-3p               | 1 |
| <i>circKATNAL2</i> | miR-6821-5p               | 4 |
| <i>circKATNAL2</i> | miR-6823-5p               | 4 |
| <i>circKATNAL2</i> | miR-6828-3p               | 2 |
| <i>circKATNAL2</i> | miR-6829-5p               | 1 |
| <i>circKATNAL2</i> | miR-6830-3p               | 1 |
| <i>circKATNAL2</i> | miR-6830-5p               | 1 |
| <i>circKATNAL2</i> | miR-6863                  | 1 |
| <i>circKATNAL2</i> | miR-6867-3p               | 1 |
| <i>circKATNAL2</i> | miR-6873-3p               | 1 |
| <i>circKATNAL2</i> | miR-6875-3p               | 4 |
| <i>circKATNAL2</i> | miR-6878-5p               | 2 |
| <i>circKATNAL2</i> | miR-6881-3p               | 1 |
| <i>circKATNAL2</i> | miR-6884-3p               | 4 |
| <i>circKATNAL2</i> | miR-6888-3p               | 1 |
| <i>circKATNAL2</i> | miR-6889-3p               | 4 |
| <i>circKATNAL2</i> | miR-6895-3p               | 1 |
| <i>circKATNAL2</i> | miR-708-3p                | 1 |
| <i>circKATNAL2</i> | miR-711                   | 3 |
| <i>circKATNAL2</i> | miR-7110-3p               | 1 |
| <i>circKATNAL2</i> | miR-7111-3p               | 1 |
| <i>circKATNAL2</i> | miR-7113-3p               | 1 |
| <i>circKATNAL2</i> | miR-7151-5p               | 2 |
| <i>circKATNAL2</i> | miR-7515                  | 2 |
| <i>circKATNAL2</i> | miR-762/4492/4498/5001-5p | 1 |
| <i>circKATNAL2</i> | miR-767-3p                | 1 |
| <i>circKATNAL2</i> | miR-7702                  | 1 |
| <i>circKATNAL2</i> | miR-8065                  | 4 |
| <i>circKATNAL2</i> | miR-892a                  | 4 |
| <i>circKATNAL2</i> | miR-942-3p                | 1 |
| <i>circKATNAL2</i> | miR-944                   | 3 |
| <i>circKATNAL2</i> | miR-99-3p                 | 4 |
| <i>circKATNAL2</i> | miR-100-3p                | 1 |
| <i>circKATNAL2</i> | miR-103a-2-5p             | 1 |

|                    |                          |   |
|--------------------|--------------------------|---|
| <i>circKATNAL2</i> | miR-1179                 | 2 |
| <i>circKATNAL2</i> | miR-1184                 | 1 |
| <i>circKATNAL2</i> | miR-1193                 | 1 |
| <i>circKATNAL2</i> | miR-1200                 | 1 |
| <i>circKATNAL2</i> | miR-1205                 | 1 |
| <i>circKATNAL2</i> | miR-1206                 | 3 |
| <i>circKATNAL2</i> | miR-1207-3p              | 1 |
| <i>circKATNAL2</i> | miR-1227-5p              | 1 |
| <i>circKATNAL2</i> | miR-1231                 | 2 |
| <i>circKATNAL2</i> | miR-1250-3p              | 1 |
| <i>circKATNAL2</i> | miR-1256                 | 1 |
| <i>circKATNAL2</i> | miR-126-5p               | 3 |
| <i>circKATNAL2</i> | miR-1262/4701-3p/6736-5p | 1 |
| <i>circKATNAL2</i> | miR-1265                 | 2 |
| <i>circKATNAL2</i> | miR-1273g-3p             | 1 |
| <i>circKATNAL2</i> | miR-1273g-5p             | 2 |
| <i>circKATNAL2</i> | miR-1279                 | 2 |
| <i>circKATNAL2</i> | miR-128-1-5p             | 2 |
| <i>circKATNAL2</i> | miR-129-5p               | 2 |
| <i>circKATNAL2</i> | miR-1293/4483            | 1 |
| <i>circKATNAL2</i> | miR-1295a                | 1 |
| <i>circKATNAL2</i> | miR-1299                 | 2 |
| <i>circKATNAL2</i> | miR-1305                 | 2 |
| <i>circKATNAL2</i> | miR-1343-3p              | 2 |
| <i>circKATNAL2</i> | miR-135b-3p              | 1 |
| <i>circKATNAL2</i> | miR-137                  | 1 |
| <i>circKATNAL2</i> | miR-140-5p               | 2 |
| <i>circKATNAL2</i> | miR-141-5p               | 5 |
| <i>circKATNAL2</i> | miR-143-5p               | 1 |
| <i>circKATNAL2</i> | miR-1537-3p              | 2 |
| <i>circKATNAL2</i> | miR-1537-5p              | 1 |
| <i>circKATNAL2</i> | miR-16-1-3p              | 1 |
| <i>circKATNAL2</i> | miR-17-3p                | 1 |
| <i>circKATNAL2</i> | miR-182-5p               | 1 |
| <i>circKATNAL2</i> | miR-183-5p.2             | 1 |
| <i>circKATNAL2</i> | miR-19-5p                | 2 |
| <i>circKATNAL2</i> | miR-1911-3p              | 1 |
| <i>circKATNAL2</i> | miR-1976                 | 1 |

|                    |                                              |   |
|--------------------|----------------------------------------------|---|
| <i>circKATNAL2</i> | miR-202-3p                                   | 1 |
| <i>circKATNAL2</i> | miR-203a-5p                                  | 2 |
| <i>circKATNAL2</i> | miR-204-3p/4646-5p                           | 1 |
| <i>circKATNAL2</i> | miR-2052                                     | 2 |
| <i>circKATNAL2</i> | miR-2054                                     | 1 |
| <i>circKATNAL2</i> | miR-217                                      | 1 |
| <i>circKATNAL2</i> | miR-222-5p                                   | 1 |
| <i>circKATNAL2</i> | miR-2276-5p                                  | 3 |
| <i>circKATNAL2</i> | miR-23-3p                                    | 1 |
| <i>circKATNAL2</i> | miR-2681-5p                                  | 2 |
| <i>circKATNAL2</i> | miR-2682-3p/6781-3p                          | 3 |
| <i>circKATNAL2</i> | miR-27-3p                                    | 1 |
| <i>circKATNAL2</i> | miR-2861                                     | 2 |
| <i>circKATNAL2</i> | miR-29b-2-5p                                 | 2 |
| <i>circKATNAL2</i> | miR-30b-3p/1273h-5p/3689-3p/6779-5p/6780a-5p |   |
| <i>circKATNAL2</i> | miR-30c-3p/6788-5p                           | 1 |
| <i>circKATNAL2</i> | miR-3121-3p                                  | 2 |
| <i>circKATNAL2</i> | miR-3122/3913-5p                             | 2 |
| <i>circKATNAL2</i> | miR-3136-5p/4439                             | 1 |
| <i>circKATNAL2</i> | miR-3152-5p                                  | 1 |
| <i>circKATNAL2</i> | miR-3156-5p                                  | 2 |
| <i>circKATNAL2</i> | miR-3158-5p                                  | 1 |
| <i>circKATNAL2</i> | miR-3160-3p                                  | 1 |
| <i>circKATNAL2</i> | miR-3170/6855-5p                             | 2 |
| <i>circKATNAL2</i> | miR-3180-5p                                  | 1 |
| <i>circKATNAL2</i> | miR-3183/4723-3p/6769b-3p                    | 1 |
| <i>circKATNAL2</i> | miR-3185                                     | 1 |
| <i>circKATNAL2</i> | miR-3192-3p                                  | 2 |
| <i>circKATNAL2</i> | miR-3192-5p                                  | 1 |
| <i>circKATNAL2</i> | miR-32-3p                                    | 2 |
| <i>circKATNAL2</i> | miR-330-3p                                   | 2 |
| <i>circKATNAL2</i> | miR-330-3p.2                                 | 2 |
| <i>circKATNAL2</i> | miR-331-3p                                   | 2 |
| <i>circKATNAL2</i> | miR-33a-3p                                   | 2 |
| <i>circKATNAL2</i> | miR-362-5p/500b-5p                           | 1 |
| <i>circKATNAL2</i> | miR-363-5p/6745                              | 1 |
| <i>circKATNAL2</i> | miR-3652/4430                                | 1 |
| <i>circKATNAL2</i> | miR-3653-3p                                  | 1 |

|                    |                  |   |
|--------------------|------------------|---|
| <i>circKATNAL2</i> | miR-3653-5p      | 1 |
| <i>circKATNAL2</i> | miR-3657         | 2 |
| <i>circKATNAL2</i> | miR-3658         | 1 |
| <i>circKATNAL2</i> | miR-3659         | 1 |
| <i>circKATNAL2</i> | miR-3663-5p      | 3 |
| <i>circKATNAL2</i> | miR-3668         | 1 |
| <i>circKATNAL2</i> | miR-3677-3p      | 1 |
| <i>circKATNAL2</i> | miR-3679-3p      | 2 |
| <i>circKATNAL2</i> | miR-3682-5p      | 3 |
| <i>circKATNAL2</i> | miR-369-3p       | 2 |
| <i>circKATNAL2</i> | miR-3692-3p      | 1 |
| <i>circKATNAL2</i> | miR-3692-5p      | 2 |
| <i>circKATNAL2</i> | miR-374a-3p      | 1 |
| <i>circKATNAL2</i> | miR-378a-5p      | 1 |
| <i>circKATNAL2</i> | miR-380-3p       | 1 |
| <i>circKATNAL2</i> | miR-382-5p       | 1 |
| <i>circKATNAL2</i> | miR-383-5p.2     | 2 |
| <i>circKATNAL2</i> | miR-3920         | 4 |
| <i>circKATNAL2</i> | miR-3924         | 1 |
| <i>circKATNAL2</i> | miR-3937         | 1 |
| <i>circKATNAL2</i> | miR-3945         | 1 |
| <i>circKATNAL2</i> | miR-409-3p       | 2 |
| <i>circKATNAL2</i> | miR-4253/6862-5p | 1 |
| <i>circKATNAL2</i> | miR-4255         | 1 |
| <i>circKATNAL2</i> | miR-4259         | 1 |
| <i>circKATNAL2</i> | miR-4260         | 2 |
| <i>circKATNAL2</i> | miR-4268         | 3 |
| <i>circKATNAL2</i> | miR-4297/5581-5p | 1 |
| <i>circKATNAL2</i> | miR-4320         | 2 |
| <i>circKATNAL2</i> | miR-4328         | 2 |
| <i>circKATNAL2</i> | miR-4417         | 1 |
| <i>circKATNAL2</i> | miR-4421/5699-3p | 2 |
| <i>circKATNAL2</i> | miR-4422         | 2 |
| <i>circKATNAL2</i> | miR-4433b-5p     | 2 |
| <i>circKATNAL2</i> | miR-4436b-5p     | 1 |
| <i>circKATNAL2</i> | miR-4448         | 3 |
| <i>circKATNAL2</i> | miR-4457         | 1 |
| <i>circKATNAL2</i> | miR-4461         | 2 |

|                    |                          |   |
|--------------------|--------------------------|---|
| <i>circKATNAL2</i> | miR-4487                 | 1 |
| <i>circKATNAL2</i> | miR-450-5p               | 3 |
| <i>circKATNAL2</i> | miR-4505/5787            | 1 |
| <i>circKATNAL2</i> | miR-4508                 | 2 |
| <i>circKATNAL2</i> | miR-450a-1-3p            | 2 |
| <i>circKATNAL2</i> | miR-450a-2-3p            | 2 |
| <i>circKATNAL2</i> | miR-451                  | 2 |
| <i>circKATNAL2</i> | miR-4520-2-3p            | 2 |
| <i>circKATNAL2</i> | miR-4524a-3p             | 1 |
| <i>circKATNAL2</i> | miR-4524b-3p             | 1 |
| <i>circKATNAL2</i> | miR-4529-3p              | 2 |
| <i>circKATNAL2</i> | miR-4535                 | 2 |
| <i>circKATNAL2</i> | miR-4537                 | 1 |
| <i>circKATNAL2</i> | miR-455-3p.2             | 1 |
| <i>circKATNAL2</i> | miR-4640-5p              | 1 |
| <i>circKATNAL2</i> | miR-4645-3p              | 1 |
| <i>circKATNAL2</i> | miR-4645-5p/4673         | 1 |
| <i>circKATNAL2</i> | miR-4655-5p              | 2 |
| <i>circKATNAL2</i> | miR-4660                 | 1 |
| <i>circKATNAL2</i> | miR-4667-5p/4700-5p/8089 | 1 |
| <i>circKATNAL2</i> | miR-4669                 | 2 |
| <i>circKATNAL2</i> | miR-4670-3p              | 1 |
| <i>circKATNAL2</i> | miR-4671-5p              | 1 |
| <i>circKATNAL2</i> | miR-4698                 | 4 |
| <i>circKATNAL2</i> | miR-4699-5p              | 2 |
| <i>circKATNAL2</i> | miR-4704-3p              | 2 |
| <i>circKATNAL2</i> | miR-4711-3p              | 2 |
| <i>circKATNAL2</i> | miR-4712-3p              | 1 |
| <i>circKATNAL2</i> | miR-4715-5p              | 1 |
| <i>circKATNAL2</i> | miR-4717-3p              | 1 |
| <i>circKATNAL2</i> | miR-4718                 | 1 |
| <i>circKATNAL2</i> | miR-4719                 | 2 |
| <i>circKATNAL2</i> | miR-4724-3p              | 1 |
| <i>circKATNAL2</i> | miR-4731-5p              | 2 |
| <i>circKATNAL2</i> | miR-4747-5p/5196-5p      | 2 |
| <i>circKATNAL2</i> | miR-4755-3p              | 1 |
| <i>circKATNAL2</i> | miR-4757-5p/6744-3p      | 3 |
| <i>circKATNAL2</i> | miR-4762-3p              | 3 |

|                    |                             |   |
|--------------------|-----------------------------|---|
| <i>circKATNAL2</i> | miR-4764-3p                 | 2 |
| <i>circKATNAL2</i> | miR-4766-5p                 | 2 |
| <i>circKATNAL2</i> | miR-4774-3p                 | 1 |
| <i>circKATNAL2</i> | miR-4776-5p                 | 2 |
| <i>circKATNAL2</i> | miR-4777-3p                 | 1 |
| <i>circKATNAL2</i> | miR-4781-3p                 | 2 |
| <i>circKATNAL2</i> | miR-4782-5p/5706            | 2 |
| <i>circKATNAL2</i> | miR-4785                    | 1 |
| <i>circKATNAL2</i> | miR-4788                    | 1 |
| <i>circKATNAL2</i> | miR-4793-5p                 | 2 |
| <i>circKATNAL2</i> | miR-4797-5p                 | 1 |
| <i>circKATNAL2</i> | miR-486-3p                  | 1 |
| <i>circKATNAL2</i> | miR-489-5p                  | 2 |
| <i>circKATNAL2</i> | miR-495-5p                  | 1 |
| <i>circKATNAL2</i> | miR-497-3p                  | 2 |
| <i>circKATNAL2</i> | miR-498                     | 3 |
| <i>circKATNAL2</i> | miR-4999-5p                 | 1 |
| <i>circKATNAL2</i> | miR-5002-3p                 | 1 |
| <i>circKATNAL2</i> | miR-5002-5p                 | 3 |
| <i>circKATNAL2</i> | miR-5003-3p                 | 2 |
| <i>circKATNAL2</i> | miR-5007-3p                 | 2 |
| <i>circKATNAL2</i> | miR-501-5p                  | 1 |
| <i>circKATNAL2</i> | miR-5011-5p                 | 1 |
| <i>circKATNAL2</i> | miR-503-3p                  | 2 |
| <i>circKATNAL2</i> | miR-509-3-5p/509-5p/4418    | 1 |
| <i>circKATNAL2</i> | miR-5090/6775-5p            | 2 |
| <i>circKATNAL2</i> | miR-513a-3p/513c-3p/3606-3p | 2 |
| <i>circKATNAL2</i> | miR-513a-5p                 | 1 |
| <i>circKATNAL2</i> | miR-513b-5p                 | 2 |
| <i>circKATNAL2</i> | miR-514a-3p                 | 4 |
| <i>circKATNAL2</i> | miR-515-5p/519e-5p          | 1 |
| <i>circKATNAL2</i> | miR-516b-5p                 | 2 |
| <i>circKATNAL2</i> | miR-5193                    | 1 |
| <i>circKATNAL2</i> | miR-5196-3p                 | 2 |
| <i>circKATNAL2</i> | miR-5197-3p                 | 1 |
| <i>circKATNAL2</i> | miR-519d-5p                 | 2 |
| <i>circKATNAL2</i> | miR-526b-5p                 | 1 |
| <i>circKATNAL2</i> | miR-541-5p                  | 1 |

|                    |                    |   |
|--------------------|--------------------|---|
| <i>circKATNAL2</i> | miR-549a           | 2 |
| <i>circKATNAL2</i> | miR-5572           | 2 |
| <i>circKATNAL2</i> | miR-5579-5p        | 1 |
| <i>circKATNAL2</i> | miR-558            | 1 |
| <i>circKATNAL2</i> | miR-5589-5p        | 2 |
| <i>circKATNAL2</i> | miR-5681a          | 1 |
| <i>circKATNAL2</i> | miR-5681b          | 2 |
| <i>circKATNAL2</i> | miR-5692a          | 2 |
| <i>circKATNAL2</i> | miR-5692bc         | 2 |
| <i>circKATNAL2</i> | miR-5694           | 2 |
| <i>circKATNAL2</i> | miR-5695           | 2 |
| <i>circKATNAL2</i> | miR-5704           | 1 |
| <i>circKATNAL2</i> | miR-5708           | 2 |
| <i>circKATNAL2</i> | miR-574-5p         | 1 |
| <i>circKATNAL2</i> | miR-578            | 3 |
| <i>circKATNAL2</i> | miR-587            | 2 |
| <i>circKATNAL2</i> | miR-590-3p         | 4 |
| <i>circKATNAL2</i> | miR-606            | 1 |
| <i>circKATNAL2</i> | miR-607            | 2 |
| <i>circKATNAL2</i> | miR-6074           | 2 |
| <i>circKATNAL2</i> | miR-6077           | 2 |
| <i>circKATNAL2</i> | miR-6128           | 1 |
| <i>circKATNAL2</i> | miR-618            | 2 |
| <i>circKATNAL2</i> | miR-619-5p/6506-5p | 1 |
| <i>circKATNAL2</i> | miR-628-5p         | 2 |
| <i>circKATNAL2</i> | miR-632/4288       | 2 |
| <i>circKATNAL2</i> | miR-635/6774-5p    | 2 |
| <i>circKATNAL2</i> | miR-637            | 1 |
| <i>circKATNAL2</i> | miR-642a-5p        | 3 |
| <i>circKATNAL2</i> | miR-6501-3p        | 1 |
| <i>circKATNAL2</i> | miR-6507-5p        | 1 |
| <i>circKATNAL2</i> | miR-6508-3p        | 1 |
| <i>circKATNAL2</i> | miR-6509-3p        | 1 |
| <i>circKATNAL2</i> | miR-651-5p         | 2 |
| <i>circKATNAL2</i> | miR-6512-5p        | 1 |
| <i>circKATNAL2</i> | miR-6513-5p        | 2 |
| <i>circKATNAL2</i> | miR-654-5p         | 1 |
| <i>circKATNAL2</i> | miR-660-3p         | 1 |

|                    |                             |   |
|--------------------|-----------------------------|---|
| <i>circKATNAL2</i> | miR-6715a-3p                | 2 |
| <i>circKATNAL2</i> | miR-6715b-3p                | 2 |
| <i>circKATNAL2</i> | miR-6721-5p                 | 1 |
| <i>circKATNAL2</i> | miR-6724-5p/6773-5p         | 1 |
| <i>circKATNAL2</i> | miR-6730-5p                 | 1 |
| <i>circKATNAL2</i> | miR-6737-5p/6812-5p/6819-5p | 2 |
| <i>circKATNAL2</i> | miR-6741-5p                 | 1 |
| <i>circKATNAL2</i> | miR-6742-3p                 | 2 |
| <i>circKATNAL2</i> | miR-6748-3p                 | 2 |
| <i>circKATNAL2</i> | miR-6748-5p                 | 1 |
| <i>circKATNAL2</i> | miR-6755-3p                 | 2 |
| <i>circKATNAL2</i> | miR-6756-5p/6766-5p         | 1 |
| <i>circKATNAL2</i> | miR-6757-5p                 | 1 |
| <i>circKATNAL2</i> | miR-6762-5p/6845-5p         | 2 |
| <i>circKATNAL2</i> | miR-6763-3p                 | 2 |
| <i>circKATNAL2</i> | miR-6769a-5p/6769b-5p       | 1 |
| <i>circKATNAL2</i> | miR-6772-3p                 | 5 |
| <i>circKATNAL2</i> | miR-6784-5p                 | 2 |
| <i>circKATNAL2</i> | miR-6793-5p                 | 1 |
| <i>circKATNAL2</i> | miR-6801-3p/6810-3p         | 2 |
| <i>circKATNAL2</i> | miR-6806-5p                 | 1 |
| <i>circKATNAL2</i> | miR-6826-3p                 | 2 |
| <i>circKATNAL2</i> | miR-6827-5p                 | 2 |
| <i>circKATNAL2</i> | miR-6838-3p                 | 1 |
| <i>circKATNAL2</i> | miR-6843-3p/6848-3p         | 3 |
| <i>circKATNAL2</i> | miR-6844                    | 3 |
| <i>circKATNAL2</i> | miR-6845-3p                 | 1 |
| <i>circKATNAL2</i> | miR-6852-5p                 | 2 |
| <i>circKATNAL2</i> | miR-6853-3p                 | 3 |
| <i>circKATNAL2</i> | miR-6868-3p                 | 1 |
| <i>circKATNAL2</i> | miR-6881-5p                 | 2 |
| <i>circKATNAL2</i> | miR-6892-3p                 | 3 |
| <i>circKATNAL2</i> | miR-7-5p                    | 2 |
| <i>circKATNAL2</i> | miR-7114-5p                 | 2 |
| <i>circKATNAL2</i> | miR-7152-3p                 | 3 |
| <i>circKATNAL2</i> | miR-7155-5p                 | 1 |
| <i>circKATNAL2</i> | miR-7641                    | 2 |
| <i>circKATNAL2</i> | miR-7849-3p                 | 2 |



|                    |                                      |   |
|--------------------|--------------------------------------|---|
| <i>circKATNAL2</i> | miR-7850-5p                          | 2 |
| <i>circKATNAL2</i> | miR-7852-3p                          | 1 |
| <i>circKATNAL2</i> | miR-8063                             | 4 |
| <i>circKATNAL2</i> | miR-8069                             | 1 |
| <i>circKATNAL2</i> | miR-8070                             | 1 |
| <i>circKATNAL2</i> | miR-8075                             | 2 |
| <i>circKATNAL2</i> | miR-875-5p                           | 1 |
| <i>circKATNAL2</i> | miR-885-3p                           | 1 |
| <i>circKATNAL2</i> | miR-887-5p                           | 2 |
| <i>circKATNAL2</i> | miR-9-3p                             | 1 |
| <i>circKATNAL2</i> | miR-92a-2-5p                         | 1 |
| <i>circKATNAL2</i> | miR-93-3p                            | 2 |
| <i>circKATNAL2</i> | miR-935                              | 2 |
| <i>circKATNAL2</i> | miR-939-3p                           | 2 |
| <i>circKATNAL2</i> | miR-943                              | 1 |
| <i>circKATNAL2</i> | miR-96-5p/1271-5p                    | 1 |
| <i>circKATNAL2</i> | miR-1226-5p                          | 1 |
| <i>circKATNAL2</i> | miR-1229-3p                          | 1 |
| <i>circKATNAL2</i> | miR-1236-3p                          | 1 |
| <i>circKATNAL2</i> | miR-124-3p.1                         | 1 |
| <i>circKATNAL2</i> | miR-1285-5p                          | 1 |
| <i>circKATNAL2</i> | miR-129-3p                           | 1 |
| <i>circKATNAL2</i> | miR-1304-3p                          | 1 |
| <i>circKATNAL2</i> | miR-148a-5p                          | 1 |
| <i>circKATNAL2</i> | miR-15-5p/16-5p/195-5p/424-5p/497-5p | 1 |
| <i>circKATNAL2</i> | miR-18-5p                            | 1 |
| <i>circKATNAL2</i> | miR-181-3p/4420                      | 2 |
| <i>circKATNAL2</i> | miR-183-5p.1                         | 1 |
| <i>circKATNAL2</i> | miR-192-3p                           | 2 |
| <i>circKATNAL2</i> | miR-197-3p                           | 1 |
| <i>circKATNAL2</i> | miR-212-5p                           | 1 |
| <i>circKATNAL2</i> | miR-214-3p/3619-5p                   | 1 |
| <i>circKATNAL2</i> | miR-224-5p                           | 1 |
| <i>circKATNAL2</i> | miR-24-3p                            | 1 |
| <i>circKATNAL2</i> | miR-29a-5p                           | 1 |
| <i>circKATNAL2</i> | miR-31-5p                            | 1 |
| <i>circKATNAL2</i> | miR-3189-3p                          | 1 |
| <i>circKATNAL2</i> | miR-323b-3p                          | 1 |

|                    |                     |   |
|--------------------|---------------------|---|
| <i>circKATNAL2</i> | miR-329-5p          | 1 |
| <i>circKATNAL2</i> | miR-3714            | 1 |
| <i>circKATNAL2</i> | miR-377-5p/6086     | 1 |
| <i>circKATNAL2</i> | miR-378j/6839-5p    | 1 |
| <i>circKATNAL2</i> | miR-3910            | 1 |
| <i>circKATNAL2</i> | miR-3922-5p         | 1 |
| <i>circKATNAL2</i> | miR-423-5p          | 1 |
| <i>circKATNAL2</i> | miR-4257            | 1 |
| <i>circKATNAL2</i> | miR-4274            | 1 |
| <i>circKATNAL2</i> | miR-4284            | 1 |
| <i>circKATNAL2</i> | miR-4291            | 1 |
| <i>circKATNAL2</i> | miR-4303            | 1 |
| <i>circKATNAL2</i> | miR-432-5p          | 1 |
| <i>circKATNAL2</i> | miR-4325            | 1 |
| <i>circKATNAL2</i> | miR-4330            | 1 |
| <i>circKATNAL2</i> | miR-4464/4748       | 1 |
| <i>circKATNAL2</i> | miR-4468            | 1 |
| <i>circKATNAL2</i> | miR-4519            | 1 |
| <i>circKATNAL2</i> | miR-452-5p/892-3p   | 1 |
| <i>circKATNAL2</i> | miR-4642            | 1 |
| <i>circKATNAL2</i> | miR-4649-3p         | 1 |
| <i>circKATNAL2</i> | miR-4687-5p         | 1 |
| <i>circKATNAL2</i> | miR-4690-3p/5685    | 1 |
| <i>circKATNAL2</i> | miR-4694-5p         | 1 |
| <i>circKATNAL2</i> | miR-4727-5p         | 1 |
| <i>circKATNAL2</i> | miR-4769-3p/6817-5p | 1 |
| <i>circKATNAL2</i> | miR-4780            | 2 |
| <i>circKATNAL2</i> | miR-493-3p          | 1 |
| <i>circKATNAL2</i> | miR-5000-5p         | 1 |
| <i>circKATNAL2</i> | miR-5001-3p         | 1 |
| <i>circKATNAL2</i> | miR-501-3p/502-3p   | 1 |
| <i>circKATNAL2</i> | miR-503-5p          | 1 |
| <i>circKATNAL2</i> | miR-512-5p          | 1 |
| <i>circKATNAL2</i> | miR-5194            | 1 |
| <i>circKATNAL2</i> | miR-544a            | 1 |
| <i>circKATNAL2</i> | miR-5571-5p         | 1 |
| <i>circKATNAL2</i> | miR-561-5p          | 1 |
| <i>circKATNAL2</i> | miR-5700            | 1 |

|                    |                     |   |
|--------------------|---------------------|---|
| <i>circKATNAL2</i> | miR-580-5p          | 1 |
| <i>circKATNAL2</i> | miR-584-5p          | 1 |
| <i>circKATNAL2</i> | miR-604             | 1 |
| <i>circKATNAL2</i> | miR-6079            | 1 |
| <i>circKATNAL2</i> | miR-615-5p          | 1 |
| <i>circKATNAL2</i> | miR-646             | 1 |
| <i>circKATNAL2</i> | miR-6511-3p         | 1 |
| <i>circKATNAL2</i> | miR-6515-3p         | 1 |
| <i>circKATNAL2</i> | miR-653-3p          | 2 |
| <i>circKATNAL2</i> | miR-655-5p          | 1 |
| <i>circKATNAL2</i> | miR-656-5p          | 1 |
| <i>circKATNAL2</i> | miR-6734-5p         | 1 |
| <i>circKATNAL2</i> | miR-6738-3p         | 1 |
| <i>circKATNAL2</i> | miR-6741-3p         | 1 |
| <i>circKATNAL2</i> | miR-6762-3p         | 1 |
| <i>circKATNAL2</i> | miR-6779-3p         | 1 |
| <i>circKATNAL2</i> | miR-6780b-3p        | 2 |
| <i>circKATNAL2</i> | miR-6782-5p         | 1 |
| <i>circKATNAL2</i> | miR-6784-3p/6862-3p | 1 |
| <i>circKATNAL2</i> | miR-6809-5p         | 1 |
| <i>circKATNAL2</i> | miR-6814-3p/6872-5p | 1 |
| <i>circKATNAL2</i> | miR-6834-5p         | 1 |
| <i>circKATNAL2</i> | miR-6847-5p         | 1 |
| <i>circKATNAL2</i> | miR-6878-3p         | 1 |
| <i>circKATNAL2</i> | miR-6882-3p         | 1 |
| <i>circKATNAL2</i> | miR-6886-3p         | 1 |
| <i>circKATNAL2</i> | miR-7106-3p         | 1 |
| <i>circKATNAL2</i> | miR-7162-3p         | 1 |
| <i>circKATNAL2</i> | miR-7703            | 1 |
| <i>circKATNAL2</i> | miR-7704            | 1 |
| <i>circKATNAL2</i> | miR-922             | 1 |
| <i>circKATNAL2</i> | miR-938             | 1 |
| <i>circKATNAL2</i> | miR-95-5p           | 1 |
| <i>circKCNH8</i>   | miR-101-3p.2        | 2 |
| <i>circKCNH8</i>   | miR-106a-3p         | 2 |
| <i>circKCNH8</i>   | miR-1193            | 1 |
| <i>circKCNH8</i>   | miR-1200            | 1 |
| <i>circKCNH8</i>   | miR-1226-5p         | 1 |

|                  |                                     |   |
|------------------|-------------------------------------|---|
| <i>circKCNH8</i> | miR-1229-3p                         | 1 |
| <i>circKCNH8</i> | miR-1236-3p                         | 1 |
| <i>circKCNH8</i> | miR-125a-3p                         | 1 |
| <i>circKCNH8</i> | miR-1269                            | 2 |
| <i>circKCNH8</i> | miR-1273f                           | 1 |
| <i>circKCNH8</i> | miR-1273g-3p                        | 2 |
| <i>circKCNH8</i> | miR-1273h-3p                        | 2 |
| <i>circKCNH8</i> | miR-1283                            | 2 |
| <i>circKCNH8</i> | miR-1288-3p                         | 1 |
| <i>circKCNH8</i> | miR-129-5p                          | 2 |
| <i>circKCNH8</i> | miR-1296-3p                         | 1 |
| <i>circKCNH8</i> | miR-1304-3p                         | 1 |
| <i>circKCNH8</i> | miR-1304-5p                         | 1 |
| <i>circKCNH8</i> | miR-1305                            | 2 |
| <i>circKCNH8</i> | miR-133a-5p                         | 2 |
| <i>circKCNH8</i> | miR-135b-3p                         | 1 |
| <i>circKCNH8</i> | miR-138-5p                          | 2 |
| <i>circKCNH8</i> | miR-143-3p                          | 1 |
| <i>circKCNH8</i> | miR-17-5p/20-5p/93-5p/106-5p/519-3p | 3 |
| <i>circKCNH8</i> | miR-181-3p/4420                     | 2 |
| <i>circKCNH8</i> | miR-181-5p                          | 2 |
| <i>circKCNH8</i> | miR-183-3p                          | 2 |
| <i>circKCNH8</i> | miR-186-5p                          | 2 |
| <i>circKCNH8</i> | miR-1910-5p                         | 2 |
| <i>circKCNH8</i> | miR-192-3p                          | 4 |
| <i>circKCNH8</i> | miR-203a-3p.1                       | 2 |
| <i>circKCNH8</i> | miR-208-5p                          | 2 |
| <i>circKCNH8</i> | miR-2114-5p                         | 2 |
| <i>circKCNH8</i> | miR-2115-3p                         | 2 |
| <i>circKCNH8</i> | miR-2116-5p                         | 2 |
| <i>circKCNH8</i> | miR-216a-5p                         | 2 |
| <i>circKCNH8</i> | miR-216b-5p                         | 2 |
| <i>circKCNH8</i> | miR-217                             | 2 |
| <i>circKCNH8</i> | miR-218-5p                          | 2 |
| <i>circKCNH8</i> | miR-219a-1-3p                       | 2 |
| <i>circKCNH8</i> | miR-22-5p                           | 2 |
| <i>circKCNH8</i> | miR-2276-3p                         | 2 |
| <i>circKCNH8</i> | miR-27-3p                           | 2 |

|                  |                                   |   |
|------------------|-----------------------------------|---|
| <i>circKCNH8</i> | miR-298                           | 2 |
| <i>circKCNH8</i> | miR-299-5p                        | 2 |
| <i>circKCNH8</i> | miR-29b-2-5p                      | 2 |
| <i>circKCNH8</i> | miR-302-3p/372-3p/373-3p/520-3p   | 2 |
| <i>circKCNH8</i> | miR-302b-5p/302d-5p               | 2 |
| <i>circKCNH8</i> | miR-302c-3p.2/520-3p              | 2 |
| <i>circKCNH8</i> | miR-3064-3p                       | 4 |
| <i>circKCNH8</i> | miR-3065-5p                       | 2 |
| <i>circKCNH8</i> | miR-3120-3p                       | 2 |
| <i>circKCNH8</i> | miR-3126-5p                       | 2 |
| <i>circKCNH8</i> | miR-3127-5p                       | 1 |
| <i>circKCNH8</i> | miR-3133                          | 2 |
| <i>circKCNH8</i> | miR-3138                          | 2 |
| <i>circKCNH8</i> | miR-3140-5p                       | 1 |
| <i>circKCNH8</i> | miR-3161                          | 1 |
| <i>circKCNH8</i> | miR-3163                          | 4 |
| <i>circKCNH8</i> | miR-3169                          | 1 |
| <i>circKCNH8</i> | miR-3179                          | 1 |
| <i>circKCNH8</i> | miR-3194-5p                       | 2 |
| <i>circKCNH8</i> | miR-32-3p                         | 1 |
| <i>circKCNH8</i> | miR-3202                          | 1 |
| <i>circKCNH8</i> | miR-323b-3p                       | 2 |
| <i>circKCNH8</i> | miR-323b-5p/410-5p/494-5p         | 4 |
| <i>circKCNH8</i> | miR-330-3p.2                      | 4 |
| <i>circKCNH8</i> | miR-335-3p                        | 2 |
| <i>circKCNH8</i> | miR-33a-3p                        | 1 |
| <i>circKCNH8</i> | miR-340-3p/6827-3p                | 1 |
| <i>circKCNH8</i> | miR-345-3p                        | 1 |
| <i>circKCNH8</i> | miR-3605-3p                       | 1 |
| <i>circKCNH8</i> | miR-3613-3p                       | 2 |
| <i>circKCNH8</i> | miR-3613-5p                       | 2 |
| <i>circKCNH8</i> | miR-3655                          | 1 |
| <i>circKCNH8</i> | miR-3662                          | 2 |
| <i>circKCNH8</i> | miR-3665                          | 1 |
| <i>circKCNH8</i> | miR-3674                          | 1 |
| <i>circKCNH8</i> | miR-3678-3p                       | 2 |
| <i>circKCNH8</i> | miR-3680-3p                       | 3 |
| <i>circKCNH8</i> | miR-3689a-5p/3689b-5p/3689e/3689f | 2 |

|                  |                                              |   |
|------------------|----------------------------------------------|---|
| <i>circKCNH8</i> | miR-369-3p                                   | 2 |
| <i>circKCNH8</i> | miR-370-3p                                   | 1 |
| <i>circKCNH8</i> | miR-374-5p                                   | 3 |
| <i>circKCNH8</i> | miR-375                                      | 1 |
| <i>circKCNH8</i> | miR-378a-5p                                  | 1 |
| <i>circKCNH8</i> | miR-3919                                     | 5 |
| <i>circKCNH8</i> | miR-3934-5p                                  | 1 |
| <i>circKCNH8</i> | miR-3973                                     | 2 |
| <i>circKCNH8</i> | miR-409-3p                                   | 2 |
| <i>circKCNH8</i> | miR-424-3p                                   | 2 |
| <i>circKCNH8</i> | miR-4267                                     | 2 |
| <i>circKCNH8</i> | miR-4270/4441/6754-5p                        | 1 |
| <i>circKCNH8</i> | miR-4273/7156-5p                             | 2 |
| <i>circKCNH8</i> | miR-4281                                     | 1 |
| <i>circKCNH8</i> | miR-4289                                     | 4 |
| <i>circKCNH8</i> | miR-431-3p                                   | 2 |
| <i>circKCNH8</i> | miR-4317                                     | 2 |
| <i>circKCNH8</i> | miR-4419a/4510/6127/6129/6130/6133           | 2 |
| <i>circKCNH8</i> | miR-4422                                     | 4 |
| <i>circKCNH8</i> | miR-4423-5p                                  | 2 |
| <i>circKCNH8</i> | miR-4431                                     | 1 |
| <i>circKCNH8</i> | miR-4433a-5p                                 | 2 |
| <i>circKCNH8</i> | miR-4436b-3p/4632-5p/6735-5p/6879-5p/7843-5p | 2 |
| <i>circKCNH8</i> | miR-4436b-5p                                 | 2 |
| <i>circKCNH8</i> | miR-4452                                     | 2 |
| <i>circKCNH8</i> | miR-4461                                     | 1 |
| <i>circKCNH8</i> | miR-4497                                     | 1 |
| <i>circKCNH8</i> | miR-4501                                     | 2 |
| <i>circKCNH8</i> | miR-450b-5p                                  | 3 |
| <i>circKCNH8</i> | miR-4515                                     | 1 |
| <i>circKCNH8</i> | miR-4520-2-3p                                | 2 |
| <i>circKCNH8</i> | miR-4520-3p                                  | 4 |
| <i>circKCNH8</i> | miR-4529-3p                                  | 2 |
| <i>circKCNH8</i> | miR-4533                                     | 1 |
| <i>circKCNH8</i> | miR-455-3p.1                                 | 2 |
| <i>circKCNH8</i> | miR-4639-5p                                  | 2 |
| <i>circKCNH8</i> | miR-4652-3p                                  | 1 |
| <i>circKCNH8</i> | miR-4656                                     | 1 |

|                  |                          |   |
|------------------|--------------------------|---|
| <i>circKCNH8</i> | miR-4663                 | 1 |
| <i>circKCNH8</i> | miR-4675/4741            | 1 |
| <i>circKCNH8</i> | miR-4677-5p              | 2 |
| <i>circKCNH8</i> | miR-4682                 | 1 |
| <i>circKCNH8</i> | miR-4691-3p              | 2 |
| <i>circKCNH8</i> | miR-4698                 | 2 |
| <i>circKCNH8</i> | miR-4704-3p              | 2 |
| <i>circKCNH8</i> | miR-4708-5p              | 1 |
| <i>circKCNH8</i> | miR-4711-5p              | 2 |
| <i>circKCNH8</i> | miR-4713-3p              | 1 |
| <i>circKCNH8</i> | miR-4728-3p              | 3 |
| <i>circKCNH8</i> | miR-4738-3p              | 2 |
| <i>circKCNH8</i> | miR-4740-5p              | 1 |
| <i>circKCNH8</i> | miR-4743-3p              | 1 |
| <i>circKCNH8</i> | miR-4747-5p/5196-5p      | 1 |
| <i>circKCNH8</i> | miR-4752                 | 2 |
| <i>circKCNH8</i> | miR-4753-3p              | 1 |
| <i>circKCNH8</i> | miR-4756-3p              | 5 |
| <i>circKCNH8</i> | miR-4759                 | 1 |
| <i>circKCNH8</i> | miR-4761-3p              | 1 |
| <i>circKCNH8</i> | miR-4768-5p/6833-3p      | 1 |
| <i>circKCNH8</i> | miR-4772-3p              | 2 |
| <i>circKCNH8</i> | miR-4776-3p              | 4 |
| <i>circKCNH8</i> | miR-4778-3p              | 1 |
| <i>circKCNH8</i> | miR-4778-5p              | 1 |
| <i>circKCNH8</i> | miR-4781-3p              | 2 |
| <i>circKCNH8</i> | miR-4800-5p              | 2 |
| <i>circKCNH8</i> | miR-4803                 | 2 |
| <i>circKCNH8</i> | miR-495-3p               | 2 |
| <i>circKCNH8</i> | miR-5002-3p              | 1 |
| <i>circKCNH8</i> | miR-5002-5p              | 2 |
| <i>circKCNH8</i> | miR-5003-3p              | 2 |
| <i>circKCNH8</i> | miR-5009-5p/8058         | 2 |
| <i>circKCNH8</i> | miR-507/557              | 3 |
| <i>circKCNH8</i> | miR-509-3-5p/509-5p/4418 | 2 |
| <i>circKCNH8</i> | miR-5093                 | 2 |
| <i>circKCNH8</i> | miR-510-5p               | 3 |
| <i>circKCNH8</i> | miR-511-3p               | 2 |

|                  |                                                                  |   |
|------------------|------------------------------------------------------------------|---|
| <i>circKCNH8</i> | miR-512-3p                                                       | 2 |
| <i>circKCNH8</i> | miR-513a-5p                                                      | 2 |
| <i>circKCNH8</i> | miR-513b-3p                                                      | 2 |
| <i>circKCNH8</i> | miR-513b-5p                                                      | 1 |
| <i>circKCNH8</i> | miR-515-5p/519e-5p                                               | 2 |
| <i>circKCNH8</i> | miR-5189-3p                                                      | 2 |
| <i>circKCNH8</i> | miR-519-3p                                                       | 2 |
| <i>circKCNH8</i> | miR-520g-3p                                                      | 2 |
| <i>circKCNH8</i> | miR-524-5p                                                       | 2 |
| <i>circKCNH8</i> | miR-526b-5p                                                      | 1 |
| <i>circKCNH8</i> | miR-541-5p                                                       | 1 |
| <i>circKCNH8</i> | miR-543                                                          | 2 |
| <i>circKCNH8</i> | miR-548ac/548bb-3p/548d-3p/548h-3p/548z                          | 2 |
| <i>circKCNH8</i> | miR-548ad-3p                                                     | 2 |
| <i>circKCNH8</i> | miR-548ah-5p/3609                                                | 3 |
| <i>circKCNH8</i> | miR-548ai/548ag/548ba/570-5p                                     | 2 |
| <i>circKCNH8</i> | miR-548ao-5p/548ax                                               | 3 |
| <i>circKCNH8</i> | miR-548aq-3p/548am-3p/548aj-3p/548ah-3p/548ae-3p/548j-3p/548x-3p | 2 |
| <i>circKCNH8</i> | miR-548az-5p/548t-5p                                             | 2 |
| <i>circKCNH8</i> | miR-548g-3p                                                      | 2 |
| <i>circKCNH8</i> | miR-548n                                                         | 2 |
| <i>circKCNH8</i> | miR-548p                                                         | 2 |
| <i>circKCNH8</i> | miR-552-3p                                                       | 2 |
| <i>circKCNH8</i> | miR-5584-5p                                                      | 1 |
| <i>circKCNH8</i> | miR-5585-5p                                                      | 3 |
| <i>circKCNH8</i> | miR-5588-3p                                                      | 2 |
| <i>circKCNH8</i> | miR-5691                                                         | 1 |
| <i>circKCNH8</i> | miR-5692a                                                        | 2 |
| <i>circKCNH8</i> | miR-5692bc                                                       | 2 |
| <i>circKCNH8</i> | miR-5700                                                         | 2 |
| <i>circKCNH8</i> | miR-5702                                                         | 3 |
| <i>circKCNH8</i> | miR-571                                                          | 2 |
| <i>circKCNH8</i> | miR-573/3616-5p                                                  | 1 |
| <i>circKCNH8</i> | miR-575/4676-5p                                                  | 4 |
| <i>circKCNH8</i> | miR-576-3p                                                       | 1 |
| <i>circKCNH8</i> | miR-578                                                          | 1 |
| <i>circKCNH8</i> | miR-582-5p                                                       | 2 |
| <i>circKCNH8</i> | miR-592                                                          | 1 |



|                  |                     |   |
|------------------|---------------------|---|
| <i>circKCNH8</i> | miR-599             | 1 |
| <i>circKCNH8</i> | miR-6131            | 2 |
| <i>circKCNH8</i> | miR-616-3p          | 2 |
| <i>circKCNH8</i> | miR-624-5p          | 1 |
| <i>circKCNH8</i> | miR-627-3p          | 2 |
| <i>circKCNH8</i> | miR-627-5p          | 1 |
| <i>circKCNH8</i> | miR-638             | 1 |
| <i>circKCNH8</i> | miR-6501-5p         | 2 |
| <i>circKCNH8</i> | miR-6507-5p         | 3 |
| <i>circKCNH8</i> | miR-6509-3p         | 2 |
| <i>circKCNH8</i> | miR-6511-5p         | 1 |
| <i>circKCNH8</i> | miR-6515-3p         | 1 |
| <i>circKCNH8</i> | miR-6516-5p         | 1 |
| <i>circKCNH8</i> | miR-653-3p          | 2 |
| <i>circKCNH8</i> | miR-657             | 1 |
| <i>circKCNH8</i> | miR-668-3p          | 2 |
| <i>circKCNH8</i> | miR-670-5p          | 1 |
| <i>circKCNH8</i> | miR-6721-5p         | 1 |
| <i>circKCNH8</i> | miR-6734-5p         | 1 |
| <i>circKCNH8</i> | miR-6739-3p         | 3 |
| <i>circKCNH8</i> | miR-6748-5p         | 1 |
| <i>circKCNH8</i> | miR-6750-5p/6822-5p | 1 |
| <i>circKCNH8</i> | miR-6752-3p         | 1 |
| <i>circKCNH8</i> | miR-6757-5p         | 1 |
| <i>circKCNH8</i> | miR-6758-3p         | 3 |
| <i>circKCNH8</i> | miR-6772-3p         | 2 |
| <i>circKCNH8</i> | miR-6793-5p         | 1 |
| <i>circKCNH8</i> | miR-6794-3p         | 1 |
| <i>circKCNH8</i> | miR-6809-3p         | 1 |
| <i>circKCNH8</i> | miR-6816-3p         | 1 |
| <i>circKCNH8</i> | miR-6818-3p         | 1 |
| <i>circKCNH8</i> | miR-6829-5p         | 1 |
| <i>circKCNH8</i> | miR-6833-5p         | 2 |
| <i>circKCNH8</i> | miR-6834-5p         | 1 |
| <i>circKCNH8</i> | miR-6844            | 1 |
| <i>circKCNH8</i> | miR-6849-3p         | 2 |
| <i>circKCNH8</i> | miR-6858-3p         | 4 |
| <i>circKCNH8</i> | miR-6890-3p         | 2 |

|                  |                           |   |
|------------------|---------------------------|---|
| <i>circKCNH8</i> | miR-7112-3p               | 2 |
| <i>circKCNH8</i> | miR-7160-5p               | 1 |
| <i>circKCNH8</i> | miR-7515                  | 1 |
| <i>circKCNH8</i> | miR-762/4492/4498/5001-5p | 1 |
| <i>circKCNH8</i> | miR-764                   | 2 |
| <i>circKCNH8</i> | miR-767-3p                | 2 |
| <i>circKCNH8</i> | miR-7850-5p               | 2 |
| <i>circKCNH8</i> | miR-7977                  | 2 |
| <i>circKCNH8</i> | miR-8063                  | 2 |
| <i>circKCNH8</i> | miR-8066                  | 1 |
| <i>circKCNH8</i> | miR-8068                  | 1 |
| <i>circKCNH8</i> | miR-8070                  | 2 |
| <i>circKCNH8</i> | miR-8077                  | 1 |
| <i>circKCNH8</i> | miR-8080                  | 1 |
| <i>circKCNH8</i> | miR-8083                  | 1 |
| <i>circKCNH8</i> | miR-875-3p                | 2 |
| <i>circKCNH8</i> | miR-888-3p                | 2 |
| <i>circKCNH8</i> | miR-9-3p                  | 2 |
| <i>circKCNH8</i> | miR-937-5p                | 1 |
| <i>circKCNH8</i> | miR-942-5p                | 1 |
| <i>circKCNH8</i> | miR-95-5p                 | 2 |
| <i>circKCNH8</i> | miR-9500                  | 1 |
| <i>circKCNH8</i> | miR-101-3p.1              | 1 |
| <i>circKCNH8</i> | miR-103-3p/107            | 5 |
| <i>circKCNH8</i> | miR-105-3p                | 2 |
| <i>circKCNH8</i> | miR-106b-3p               | 2 |
| <i>circKCNH8</i> | miR-1178-3p               | 1 |
| <i>circKCNH8</i> | miR-1180-5p               | 1 |
| <i>circKCNH8</i> | miR-1183                  | 2 |
| <i>circKCNH8</i> | miR-1184                  | 2 |
| <i>circKCNH8</i> | miR-1185-5p               | 1 |
| <i>circKCNH8</i> | miR-1197                  | 1 |
| <i>circKCNH8</i> | miR-1203                  | 2 |
| <i>circKCNH8</i> | miR-1205                  | 2 |
| <i>circKCNH8</i> | miR-1206                  | 2 |
| <i>circKCNH8</i> | miR-1207-3p               | 1 |
| <i>circKCNH8</i> | miR-1207-5p/4763-3p       | 1 |
| <i>circKCNH8</i> | miR-1208                  | 5 |

|                  |                    |   |
|------------------|--------------------|---|
| <i>circKCNH8</i> | miR-122-3p         | 2 |
| <i>circKCNH8</i> | miR-122-5p         | 2 |
| <i>circKCNH8</i> | miR-1224-5p        | 1 |
| <i>circKCNH8</i> | miR-1225-5p        | 1 |
| <i>circKCNH8</i> | miR-1227-5p        | 2 |
| <i>circKCNH8</i> | miR-1229-5p        | 1 |
| <i>circKCNH8</i> | miR-1233-3p        | 2 |
| <i>circKCNH8</i> | miR-1237-3p        | 2 |
| <i>circKCNH8</i> | miR-124-3p.1       | 2 |
| <i>circKCNH8</i> | miR-1243           | 1 |
| <i>circKCNH8</i> | miR-1245a/8079     | 4 |
| <i>circKCNH8</i> | miR-1245b-3p       | 1 |
| <i>circKCNH8</i> | miR-1246           | 1 |
| <i>circKCNH8</i> | miR-1248           | 2 |
| <i>circKCNH8</i> | miR-1250-3p        | 2 |
| <i>circKCNH8</i> | miR-1251-5p        | 1 |
| <i>circKCNH8</i> | miR-1252-3p        | 1 |
| <i>circKCNH8</i> | miR-1252-5p        | 2 |
| <i>circKCNH8</i> | miR-1253           | 2 |
| <i>circKCNH8</i> | miR-1255a/1255b-5p | 3 |
| <i>circKCNH8</i> | miR-1255b-2-3p     | 1 |
| <i>circKCNH8</i> | miR-1256           | 1 |
| <i>circKCNH8</i> | miR-1257           | 1 |
| <i>circKCNH8</i> | miR-126-3p.1       | 2 |
| <i>circKCNH8</i> | miR-1260a/1260b    | 1 |
| <i>circKCNH8</i> | miR-1264           | 3 |
| <i>circKCNH8</i> | miR-1265           | 1 |
| <i>circKCNH8</i> | miR-1267           | 1 |
| <i>circKCNH8</i> | miR-127-3p         | 1 |
| <i>circKCNH8</i> | miR-127-5p         | 1 |
| <i>circKCNH8</i> | miR-1270           | 5 |
| <i>circKCNH8</i> | miR-1272           | 1 |
| <i>circKCNH8</i> | miR-1273d          | 1 |
| <i>circKCNH8</i> | miR-1273e          | 2 |
| <i>circKCNH8</i> | miR-1276           | 4 |
| <i>circKCNH8</i> | miR-1277-5p        | 3 |
| <i>circKCNH8</i> | miR-1278           | 2 |
| <i>circKCNH8</i> | miR-1279           | 1 |

|                  |                                      |   |
|------------------|--------------------------------------|---|
| <i>circKCNH8</i> | miR-128-3p                           | 1 |
| <i>circKCNH8</i> | miR-1286                             | 1 |
| <i>circKCNH8</i> | miR-1287-3p                          | 2 |
| <i>circKCNH8</i> | miR-1288-5p                          | 2 |
| <i>circKCNH8</i> | miR-1294                             | 2 |
| <i>circKCNH8</i> | miR-1295b-3p                         | 1 |
| <i>circKCNH8</i> | miR-1298-3p                          | 4 |
| <i>circKCNH8</i> | miR-1299                             | 6 |
| <i>circKCNH8</i> | miR-130-3p/301-3p/454-3p             | 4 |
| <i>circKCNH8</i> | miR-1301-3p                          | 2 |
| <i>circKCNH8</i> | miR-1306-5p                          | 1 |
| <i>circKCNH8</i> | miR-130b-5p                          | 1 |
| <i>circKCNH8</i> | miR-1322                             | 1 |
| <i>circKCNH8</i> | miR-1323                             | 1 |
| <i>circKCNH8</i> | miR-133a-3p.1                        | 1 |
| <i>circKCNH8</i> | miR-133a-3p.2/133b                   | 2 |
| <i>circKCNH8</i> | miR-134-5p                           | 2 |
| <i>circKCNH8</i> | miR-1343-3p                          | 2 |
| <i>circKCNH8</i> | miR-136-5p                           | 2 |
| <i>circKCNH8</i> | miR-139-3p                           | 2 |
| <i>circKCNH8</i> | miR-141-5p                           | 3 |
| <i>circKCNH8</i> | miR-142-3p.2                         | 2 |
| <i>circKCNH8</i> | miR-144-3p                           | 1 |
| <i>circKCNH8</i> | miR-145-3p                           | 1 |
| <i>circKCNH8</i> | miR-145-5p                           | 3 |
| <i>circKCNH8</i> | miR-1468-3p                          | 2 |
| <i>circKCNH8</i> | miR-146a-3p                          | 2 |
| <i>circKCNH8</i> | miR-148b-5p/6874-3p                  | 2 |
| <i>circKCNH8</i> | miR-15-5p/16-5p/195-5p/424-5p/497-5p | 1 |
| <i>circKCNH8</i> | miR-150-5p                           | 1 |
| <i>circKCNH8</i> | miR-153-3p                           | 2 |
| <i>circKCNH8</i> | miR-153-5p                           | 2 |
| <i>circKCNH8</i> | miR-154-5p                           | 1 |
| <i>circKCNH8</i> | miR-155-3p                           | 1 |
| <i>circKCNH8</i> | miR-15a-3p                           | 1 |
| <i>circKCNH8</i> | miR-16-2-3p/195-3p                   | 1 |
| <i>circKCNH8</i> | miR-17-3p                            | 2 |
| <i>circKCNH8</i> | miR-182-3p                           | 1 |

|                  |                      |   |
|------------------|----------------------|---|
| <i>circKCNH8</i> | miR-182-5p           | 2 |
| <i>circKCNH8</i> | miR-1825             | 2 |
| <i>circKCNH8</i> | miR-1827             | 2 |
| <i>circKCNH8</i> | miR-183-5p.2         | 3 |
| <i>circKCNH8</i> | miR-185-5p           | 1 |
| <i>circKCNH8</i> | miR-188-3p           | 1 |
| <i>circKCNH8</i> | miR-19-3p            | 4 |
| <i>circKCNH8</i> | miR-19-5p            | 2 |
| <i>circKCNH8</i> | miR-190-5p           | 1 |
| <i>circKCNH8</i> | miR-1909-3p/6722-3p  | 2 |
| <i>circKCNH8</i> | miR-1909-5p          | 2 |
| <i>circKCNH8</i> | miR-190a-3p          | 1 |
| <i>circKCNH8</i> | miR-1910-3p/6511a-5p | 3 |
| <i>circKCNH8</i> | miR-1911-5p          | 2 |
| <i>circKCNH8</i> | miR-192-5p/215-5p    | 1 |
| <i>circKCNH8</i> | miR-196b-3p          | 1 |
| <i>circKCNH8</i> | miR-1976             | 1 |
| <i>circKCNH8</i> | miR-199-3p           | 1 |
| <i>circKCNH8</i> | miR-199-5p           | 2 |
| <i>circKCNH8</i> | miR-200-3p/429       | 1 |
| <i>circKCNH8</i> | miR-202-3p           | 2 |
| <i>circKCNH8</i> | miR-202-5p           | 1 |
| <i>circKCNH8</i> | miR-204-3p/4646-5p   | 1 |
| <i>circKCNH8</i> | miR-2052             | 2 |
| <i>circKCNH8</i> | miR-2053             | 2 |
| <i>circKCNH8</i> | miR-20a-3p           | 3 |
| <i>circKCNH8</i> | miR-21-3p/3591-3p    | 2 |
| <i>circKCNH8</i> | miR-211-3p           | 2 |
| <i>circKCNH8</i> | miR-2113             | 1 |
| <i>circKCNH8</i> | miR-2116-3p          | 1 |
| <i>circKCNH8</i> | miR-214-3p/3619-5p   | 5 |
| <i>circKCNH8</i> | miR-215-3p           | 4 |
| <i>circKCNH8</i> | miR-218-1-3p         | 1 |
| <i>circKCNH8</i> | miR-218-2-3p         | 1 |
| <i>circKCNH8</i> | miR-219a-2-3p        | 1 |
| <i>circKCNH8</i> | miR-219b-3p          | 1 |
| <i>circKCNH8</i> | miR-219b-5p          | 2 |
| <i>circKCNH8</i> | miR-223-5p           | 1 |

|                  |                                              |   |
|------------------|----------------------------------------------|---|
| <i>circKCNH8</i> | miR-2276-5p                                  | 1 |
| <i>circKCNH8</i> | miR-2277-3p                                  | 1 |
| <i>circKCNH8</i> | miR-2392                                     | 1 |
| <i>circKCNH8</i> | miR-2467-3p                                  | 3 |
| <i>circKCNH8</i> | miR-2467-5p                                  | 1 |
| <i>circKCNH8</i> | miR-26-3p                                    | 2 |
| <i>circKCNH8</i> | miR-26-5p                                    | 2 |
| <i>circKCNH8</i> | miR-2682-3p/6781-3p                          | 1 |
| <i>circKCNH8</i> | miR-27b-5p                                   | 1 |
| <i>circKCNH8</i> | miR-28-3p                                    | 1 |
| <i>circKCNH8</i> | miR-29-3p                                    | 2 |
| <i>circKCNH8</i> | miR-296-5p                                   | 1 |
| <i>circKCNH8</i> | miR-297                                      | 3 |
| <i>circKCNH8</i> | miR-29a-5p                                   | 2 |
| <i>circKCNH8</i> | miR-30-3p                                    | 4 |
| <i>circKCNH8</i> | miR-3064-5p                                  | 1 |
| <i>circKCNH8</i> | miR-3065-3p                                  | 2 |
| <i>circKCNH8</i> | miR-3074-5p                                  | 1 |
| <i>circKCNH8</i> | miR-30b-3p/1273h-5p/3689-3p/6779-5p/6780a-5p | 1 |
| <i>circKCNH8</i> | miR-30c-3p/6788-5p                           | 1 |
| <i>circKCNH8</i> | miR-31-5p                                    | 2 |
| <i>circKCNH8</i> | miR-3117-5p                                  | 1 |
| <i>circKCNH8</i> | miR-3120-5p                                  | 5 |
| <i>circKCNH8</i> | miR-3121-5p                                  | 3 |
| <i>circKCNH8</i> | miR-3122/3913-5p                             | 3 |
| <i>circKCNH8</i> | miR-3123                                     | 1 |
| <i>circKCNH8</i> | miR-3124-3p                                  | 3 |
| <i>circKCNH8</i> | miR-3125/3916/6859-5p                        | 2 |
| <i>circKCNH8</i> | miR-3126-3p                                  | 4 |
| <i>circKCNH8</i> | miR-3127-3p/6756-3p                          | 4 |
| <i>circKCNH8</i> | miR-3128                                     | 2 |
| <i>circKCNH8</i> | miR-3134                                     | 5 |
| <i>circKCNH8</i> | miR-3136-5p/4439                             | 3 |
| <i>circKCNH8</i> | miR-3140-3p                                  | 1 |
| <i>circKCNH8</i> | miR-3147                                     | 4 |
| <i>circKCNH8</i> | miR-3148                                     | 2 |
| <i>circKCNH8</i> | miR-3149                                     | 1 |
| <i>circKCNH8</i> | miR-3150a-5p/3150b-5p                        | 1 |

|                  |                           |   |
|------------------|---------------------------|---|
| <i>circKCNH8</i> | miR-3150b-3p              | 1 |
| <i>circKCNH8</i> | miR-3151-3p               | 1 |
| <i>circKCNH8</i> | miR-3153/6733-5p/6739-5p  | 1 |
| <i>circKCNH8</i> | miR-3154                  | 2 |
| <i>circKCNH8</i> | miR-3156-3p               | 1 |
| <i>circKCNH8</i> | miR-3156-5p               | 4 |
| <i>circKCNH8</i> | miR-3158-5p               | 2 |
| <i>circKCNH8</i> | miR-3160-5p               | 2 |
| <i>circKCNH8</i> | miR-3164                  | 2 |
| <i>circKCNH8</i> | miR-3166                  | 2 |
| <i>circKCNH8</i> | miR-3168                  | 2 |
| <i>circKCNH8</i> | miR-3170/6855-5p          | 2 |
| <i>circKCNH8</i> | miR-3173-3p/6891-5p       | 3 |
| <i>circKCNH8</i> | miR-3180-5p               | 1 |
| <i>circKCNH8</i> | miR-3182                  | 3 |
| <i>circKCNH8</i> | miR-3183/4723-3p/6769b-3p | 1 |
| <i>circKCNH8</i> | miR-3184-3p               | 3 |
| <i>circKCNH8</i> | miR-3186-5p               | 2 |
| <i>circKCNH8</i> | miR-3187-3p               | 2 |
| <i>circKCNH8</i> | miR-3188                  | 1 |
| <i>circKCNH8</i> | miR-3192-3p               | 1 |
| <i>circKCNH8</i> | miR-3192-5p               | 1 |
| <i>circKCNH8</i> | miR-3193                  | 1 |
| <i>circKCNH8</i> | miR-3197                  | 2 |
| <i>circKCNH8</i> | miR-3198/4309             | 2 |
| <i>circKCNH8</i> | miR-320                   | 2 |
| <i>circKCNH8</i> | miR-320e                  | 1 |
| <i>circKCNH8</i> | miR-323-3p                | 1 |
| <i>circKCNH8</i> | miR-324-5p                | 4 |
| <i>circKCNH8</i> | miR-329-5p                | 3 |
| <i>circKCNH8</i> | miR-33-5p                 | 2 |
| <i>circKCNH8</i> | miR-330-3p                | 3 |
| <i>circKCNH8</i> | miR-335-5p                | 2 |
| <i>circKCNH8</i> | miR-338-3p                | 3 |
| <i>circKCNH8</i> | miR-338-5p                | 1 |
| <i>circKCNH8</i> | miR-34-5p/449-5p          | 1 |
| <i>circKCNH8</i> | miR-340-5p                | 2 |
| <i>circKCNH8</i> | miR-342-3p                | 1 |

|                  |                       |   |
|------------------|-----------------------|---|
| <i>circKCNH8</i> | miR-342-5p/4664-5p    | 1 |
| <i>circKCNH8</i> | miR-345-5p            | 1 |
| <i>circKCNH8</i> | miR-34a-3p            | 2 |
| <i>circKCNH8</i> | miR-34b-3p            | 3 |
| <i>circKCNH8</i> | miR-34b-5p/449c-5p    | 3 |
| <i>circKCNH8</i> | miR-34c-3p            | 3 |
| <i>circKCNH8</i> | miR-3529-3p           | 1 |
| <i>circKCNH8</i> | miR-3605-5p           | 1 |
| <i>circKCNH8</i> | miR-3606-5p           | 2 |
| <i>circKCNH8</i> | miR-3607-3p           | 1 |
| <i>circKCNH8</i> | miR-361-3p            | 1 |
| <i>circKCNH8</i> | miR-3611              | 2 |
| <i>circKCNH8</i> | miR-3614-3p           | 1 |
| <i>circKCNH8</i> | miR-3614-5p           | 1 |
| <i>circKCNH8</i> | miR-3617-3p           | 2 |
| <i>circKCNH8</i> | miR-3619-3p           | 2 |
| <i>circKCNH8</i> | miR-362-5p/500b-5p    | 2 |
| <i>circKCNH8</i> | miR-3620-3p           | 1 |
| <i>circKCNH8</i> | miR-3622a-3p/3622b-3p | 1 |
| <i>circKCNH8</i> | miR-3622a-5p          | 2 |
| <i>circKCNH8</i> | miR-3646              | 1 |
| <i>circKCNH8</i> | miR-3649              | 2 |
| <i>circKCNH8</i> | miR-3651              | 2 |
| <i>circKCNH8</i> | miR-3652/4430         | 3 |
| <i>circKCNH8</i> | miR-3653-3p           | 5 |
| <i>circKCNH8</i> | miR-3653-5p           | 1 |
| <i>circKCNH8</i> | miR-3654              | 1 |
| <i>circKCNH8</i> | miR-3658              | 2 |
| <i>circKCNH8</i> | miR-3660/4526         | 1 |
| <i>circKCNH8</i> | miR-3663-3p           | 2 |
| <i>circKCNH8</i> | miR-367-5p            | 1 |
| <i>circKCNH8</i> | miR-3671              | 1 |
| <i>circKCNH8</i> | miR-3677-5p           | 1 |
| <i>circKCNH8</i> | miR-3681-5p           | 1 |
| <i>circKCNH8</i> | miR-3682-3p           | 1 |
| <i>circKCNH8</i> | miR-3685              | 1 |
| <i>circKCNH8</i> | miR-3686              | 3 |
| <i>circKCNH8</i> | miR-3688-3p           | 2 |



|                  |                     |   |
|------------------|---------------------|---|
| <i>circKCNH8</i> | miR-3688-5p         | 1 |
| <i>circKCNH8</i> | miR-3689d/6851-5p   | 1 |
| <i>circKCNH8</i> | miR-3690            | 1 |
| <i>circKCNH8</i> | miR-3691-5p         | 1 |
| <i>circKCNH8</i> | miR-3692-3p         | 1 |
| <i>circKCNH8</i> | miR-3692-5p         | 1 |
| <i>circKCNH8</i> | miR-3714            | 2 |
| <i>circKCNH8</i> | miR-374-5p/655-3p   | 1 |
| <i>circKCNH8</i> | miR-374b-3p         | 1 |
| <i>circKCNH8</i> | miR-376a-2-5p       | 2 |
| <i>circKCNH8</i> | miR-376a-5p         | 2 |
| <i>circKCNH8</i> | miR-376c-3p         | 1 |
| <i>circKCNH8</i> | miR-377-5p/6086     | 3 |
| <i>circKCNH8</i> | miR-380-5p/563      | 1 |
| <i>circKCNH8</i> | miR-381-3p          | 2 |
| <i>circKCNH8</i> | miR-382-5p          | 2 |
| <i>circKCNH8</i> | miR-383-3p          | 2 |
| <i>circKCNH8</i> | miR-383-5p.2        | 2 |
| <i>circKCNH8</i> | miR-384             | 1 |
| <i>circKCNH8</i> | miR-3910            | 2 |
| <i>circKCNH8</i> | miR-3912-3p         | 2 |
| <i>circKCNH8</i> | miR-3915            | 1 |
| <i>circKCNH8</i> | miR-3917            | 1 |
| <i>circKCNH8</i> | miR-3918            | 1 |
| <i>circKCNH8</i> | miR-3920            | 1 |
| <i>circKCNH8</i> | miR-3922-5p         | 3 |
| <i>circKCNH8</i> | miR-3924            | 1 |
| <i>circKCNH8</i> | miR-3925-5p         | 1 |
| <i>circKCNH8</i> | miR-3928-3p         | 2 |
| <i>circKCNH8</i> | miR-3929/4419b/4478 | 2 |
| <i>circKCNH8</i> | miR-3934-3p         | 1 |
| <i>circKCNH8</i> | miR-3935            | 2 |
| <i>circKCNH8</i> | miR-3940-3p         | 2 |
| <i>circKCNH8</i> | miR-3940-5p/4507    | 1 |
| <i>circKCNH8</i> | miR-3942-3p         | 3 |
| <i>circKCNH8</i> | miR-3943            | 2 |
| <i>circKCNH8</i> | miR-3944-5p         | 1 |
| <i>circKCNH8</i> | miR-3974            | 1 |

|                  |                     |   |
|------------------|---------------------|---|
| <i>circKCNH8</i> | miR-3975            | 1 |
| <i>circKCNH8</i> | miR-3976            | 2 |
| <i>circKCNH8</i> | miR-3977            | 1 |
| <i>circKCNH8</i> | miR-3978            | 2 |
| <i>circKCNH8</i> | miR-409-5p          | 1 |
| <i>circKCNH8</i> | miR-410-3p          | 4 |
| <i>circKCNH8</i> | miR-411-3p          | 2 |
| <i>circKCNH8</i> | miR-411-5p.1        | 2 |
| <i>circKCNH8</i> | miR-4254            | 1 |
| <i>circKCNH8</i> | miR-4259            | 1 |
| <i>circKCNH8</i> | miR-4260            | 3 |
| <i>circKCNH8</i> | miR-4261            | 1 |
| <i>circKCNH8</i> | miR-4272            | 2 |
| <i>circKCNH8</i> | miR-4275            | 2 |
| <i>circKCNH8</i> | miR-4276            | 1 |
| <i>circKCNH8</i> | miR-4277            | 2 |
| <i>circKCNH8</i> | miR-4279            | 3 |
| <i>circKCNH8</i> | miR-4280            | 1 |
| <i>circKCNH8</i> | miR-4291            | 1 |
| <i>circKCNH8</i> | miR-4299            | 3 |
| <i>circKCNH8</i> | miR-4301            | 2 |
| <i>circKCNH8</i> | miR-4302            | 2 |
| <i>circKCNH8</i> | miR-431-5p          | 1 |
| <i>circKCNH8</i> | miR-4310/7157-5p    | 2 |
| <i>circKCNH8</i> | miR-4311            | 4 |
| <i>circKCNH8</i> | miR-4313            | 1 |
| <i>circKCNH8</i> | miR-4314            | 2 |
| <i>circKCNH8</i> | miR-4316            | 2 |
| <i>circKCNH8</i> | miR-4318            | 4 |
| <i>circKCNH8</i> | miR-432-3p          | 1 |
| <i>circKCNH8</i> | miR-4320            | 1 |
| <i>circKCNH8</i> | miR-4321            | 2 |
| <i>circKCNH8</i> | miR-4323            | 2 |
| <i>circKCNH8</i> | miR-4324            | 2 |
| <i>circKCNH8</i> | miR-433-3p          | 3 |
| <i>circKCNH8</i> | miR-4423-3p         | 1 |
| <i>circKCNH8</i> | miR-4425            | 4 |
| <i>circKCNH8</i> | miR-4426/4647/4662b | 5 |

|                  |                    |   |
|------------------|--------------------|---|
| <i>circKCNH8</i> | miR-4427           | 2 |
| <i>circKCNH8</i> | miR-4428           | 3 |
| <i>circKCNH8</i> | miR-4433b-3p       | 2 |
| <i>circKCNH8</i> | miR-4434/4516/5703 | 3 |
| <i>circKCNH8</i> | miR-4435           | 2 |
| <i>circKCNH8</i> | miR-4446-5p        | 2 |
| <i>circKCNH8</i> | miR-4455           | 1 |
| <i>circKCNH8</i> | miR-4456           | 3 |
| <i>circKCNH8</i> | miR-4457           | 1 |
| <i>circKCNH8</i> | miR-4460           | 2 |
| <i>circKCNH8</i> | miR-4462           | 2 |
| <i>circKCNH8</i> | miR-4464/4748      | 3 |
| <i>circKCNH8</i> | miR-4468           | 2 |
| <i>circKCNH8</i> | miR-4474-5p        | 1 |
| <i>circKCNH8</i> | miR-4475           | 3 |
| <i>circKCNH8</i> | miR-4477b          | 1 |
| <i>circKCNH8</i> | miR-448            | 2 |
| <i>circKCNH8</i> | miR-4484           | 1 |
| <i>circKCNH8</i> | miR-4493           | 1 |
| <i>circKCNH8</i> | miR-4494           | 1 |
| <i>circKCNH8</i> | miR-4495           | 1 |
| <i>circKCNH8</i> | miR-4496           | 4 |
| <i>circKCNH8</i> | miR-4504           | 1 |
| <i>circKCNH8</i> | miR-4505/5787      | 3 |
| <i>circKCNH8</i> | miR-450a-1-3p      | 3 |
| <i>circKCNH8</i> | miR-450a-2-3p      | 3 |
| <i>circKCNH8</i> | miR-450b-3p/769-3p | 1 |
| <i>circKCNH8</i> | miR-4511           | 2 |
| <i>circKCNH8</i> | miR-4513/6855-3p   | 2 |
| <i>circKCNH8</i> | miR-4517           | 1 |
| <i>circKCNH8</i> | miR-451b           | 1 |
| <i>circKCNH8</i> | miR-452-3p         | 2 |
| <i>circKCNH8</i> | miR-452-5p/892-3p  | 2 |
| <i>circKCNH8</i> | miR-4524-5p        | 2 |
| <i>circKCNH8</i> | miR-4524a-3p       | 5 |
| <i>circKCNH8</i> | miR-4524b-3p       | 3 |
| <i>circKCNH8</i> | miR-4529-5p        | 1 |
| <i>circKCNH8</i> | miR-4530           | 3 |

|                  |                          |   |
|------------------|--------------------------|---|
| <i>circKCNH8</i> | miR-4531                 | 5 |
| <i>circKCNH8</i> | miR-4534/8082            | 5 |
| <i>circKCNH8</i> | miR-4535                 | 1 |
| <i>circKCNH8</i> | miR-4536-3p              | 2 |
| <i>circKCNH8</i> | miR-455-5p               | 2 |
| <i>circKCNH8</i> | miR-4633-3p/6500-5p      | 1 |
| <i>circKCNH8</i> | miR-4639-3p              | 1 |
| <i>circKCNH8</i> | miR-4642                 | 1 |
| <i>circKCNH8</i> | miR-4649-3p              | 2 |
| <i>circKCNH8</i> | miR-4659a-5p/4659b-5p    | 1 |
| <i>circKCNH8</i> | miR-4661-3p              | 1 |
| <i>circKCNH8</i> | miR-4662-5p              | 2 |
| <i>circKCNH8</i> | miR-4662a-3p             | 3 |
| <i>circKCNH8</i> | miR-4666a-3p             | 2 |
| <i>circKCNH8</i> | miR-4667-5p/4700-5p/8089 | 1 |
| <i>circKCNH8</i> | miR-4668-5p              | 1 |
| <i>circKCNH8</i> | miR-4670-3p              | 1 |
| <i>circKCNH8</i> | miR-4677-3p              | 2 |
| <i>circKCNH8</i> | miR-4678                 | 1 |
| <i>circKCNH8</i> | miR-4679                 | 2 |
| <i>circKCNH8</i> | miR-4680-3p              | 2 |
| <i>circKCNH8</i> | miR-4683                 | 2 |
| <i>circKCNH8</i> | miR-4686                 | 1 |
| <i>circKCNH8</i> | miR-4687-3p              | 1 |
| <i>circKCNH8</i> | miR-4689/6858-5p         | 1 |
| <i>circKCNH8</i> | miR-4690-3p/5685         | 2 |
| <i>circKCNH8</i> | miR-4690-5p              | 2 |
| <i>circKCNH8</i> | miR-4693-3p              | 1 |
| <i>circKCNH8</i> | miR-4693-5p              | 4 |
| <i>circKCNH8</i> | miR-4694-3p              | 1 |
| <i>circKCNH8</i> | miR-4694-5p              | 1 |
| <i>circKCNH8</i> | miR-4695-3p              | 2 |
| <i>circKCNH8</i> | miR-4695-5p              | 1 |
| <i>circKCNH8</i> | miR-4696                 | 3 |
| <i>circKCNH8</i> | miR-4699-3p              | 1 |
| <i>circKCNH8</i> | miR-4699-5p              | 7 |
| <i>circKCNH8</i> | miR-4704-5p              | 1 |
| <i>circKCNH8</i> | miR-4705                 | 1 |

|                  |                             |   |
|------------------|-----------------------------|---|
| <i>circKCNH8</i> | miR-4707-5p                 | 4 |
| <i>circKCNH8</i> | miR-4708-3p                 | 2 |
| <i>circKCNH8</i> | miR-4710                    | 1 |
| <i>circKCNH8</i> | miR-4712-3p                 | 1 |
| <i>circKCNH8</i> | miR-4714-3p                 | 1 |
| <i>circKCNH8</i> | miR-4715-5p                 | 1 |
| <i>circKCNH8</i> | miR-4720-5p/4799-3p/5588-5p | 2 |
| <i>circKCNH8</i> | miR-4722-5p                 | 1 |
| <i>circKCNH8</i> | miR-4724-3p                 | 1 |
| <i>circKCNH8</i> | miR-4724-5p                 | 1 |
| <i>circKCNH8</i> | miR-4727-3p                 | 2 |
| <i>circKCNH8</i> | miR-4727-5p                 | 1 |
| <i>circKCNH8</i> | miR-4731-3p/4801            | 1 |
| <i>circKCNH8</i> | miR-4732-5p                 | 2 |
| <i>circKCNH8</i> | miR-4733-5p                 | 1 |
| <i>circKCNH8</i> | miR-4736                    | 1 |
| <i>circKCNH8</i> | miR-4740-3p                 | 2 |
| <i>circKCNH8</i> | miR-4742-3p                 | 3 |
| <i>circKCNH8</i> | miR-4750-3p                 | 2 |
| <i>circKCNH8</i> | miR-4755-5p/5006-3p         | 1 |
| <i>circKCNH8</i> | miR-4757-3p                 | 2 |
| <i>circKCNH8</i> | miR-4761-5p                 | 1 |
| <i>circKCNH8</i> | miR-4762-3p                 | 1 |
| <i>circKCNH8</i> | miR-4763-5p                 | 2 |
| <i>circKCNH8</i> | miR-4764-3p                 | 1 |
| <i>circKCNH8</i> | miR-4766-5p                 | 1 |
| <i>circKCNH8</i> | miR-4771                    | 2 |
| <i>circKCNH8</i> | miR-4773                    | 2 |
| <i>circKCNH8</i> | miR-4776-5p                 | 1 |
| <i>circKCNH8</i> | miR-4777-3p                 | 1 |
| <i>circKCNH8</i> | miR-4779                    | 1 |
| <i>circKCNH8</i> | miR-4780                    | 2 |
| <i>circKCNH8</i> | miR-4782-5p/5706            | 6 |
| <i>circKCNH8</i> | miR-4786-3p                 | 1 |
| <i>circKCNH8</i> | miR-4786-5p                 | 2 |
| <i>circKCNH8</i> | miR-4792                    | 1 |
| <i>circKCNH8</i> | miR-4793-5p                 | 4 |
| <i>circKCNH8</i> | miR-4796-3p                 | 1 |

|                  |                     |   |
|------------------|---------------------|---|
| <i>circKCNH8</i> | miR-4797-5p         | 4 |
| <i>circKCNH8</i> | miR-4802-3p         | 2 |
| <i>circKCNH8</i> | miR-4802-5p         | 4 |
| <i>circKCNH8</i> | miR-485-5p          | 1 |
| <i>circKCNH8</i> | miR-486-3p          | 2 |
| <i>circKCNH8</i> | miR-487-3p          | 1 |
| <i>circKCNH8</i> | miR-487a-5p/487b-5p | 1 |
| <i>circKCNH8</i> | miR-488-3p          | 2 |
| <i>circKCNH8</i> | miR-488-5p          | 3 |
| <i>circKCNH8</i> | miR-489-3p          | 2 |
| <i>circKCNH8</i> | miR-490-5p          | 4 |
| <i>circKCNH8</i> | miR-491-3p          | 1 |
| <i>circKCNH8</i> | miR-494-3p          | 2 |
| <i>circKCNH8</i> | miR-495-5p          | 2 |
| <i>circKCNH8</i> | miR-496.2           | 1 |
| <i>circKCNH8</i> | miR-498             | 2 |
| <i>circKCNH8</i> | miR-4999-3p         | 1 |
| <i>circKCNH8</i> | miR-499b-5p         | 1 |
| <i>circKCNH8</i> | miR-5000-3p         | 3 |
| <i>circKCNH8</i> | miR-5000-5p         | 2 |
| <i>circKCNH8</i> | miR-5001-3p         | 1 |
| <i>circKCNH8</i> | miR-5007-5p         | 4 |
| <i>circKCNH8</i> | miR-500a-5p         | 1 |
| <i>circKCNH8</i> | miR-501-3p/502-3p   | 2 |
| <i>circKCNH8</i> | miR-501-5p          | 2 |
| <i>circKCNH8</i> | miR-5010-3p         | 1 |
| <i>circKCNH8</i> | miR-502-5p          | 2 |
| <i>circKCNH8</i> | miR-503-5p          | 1 |
| <i>circKCNH8</i> | miR-505-3p.1        | 1 |
| <i>circKCNH8</i> | miR-5087            | 1 |
| <i>circKCNH8</i> | miR-5089-3p         | 1 |
| <i>circKCNH8</i> | miR-5089-5p         | 1 |
| <i>circKCNH8</i> | miR-509-3p          | 1 |
| <i>circKCNH8</i> | miR-5092            | 1 |
| <i>circKCNH8</i> | miR-5095/7151-3p    | 1 |
| <i>circKCNH8</i> | miR-5096            | 1 |
| <i>circKCNH8</i> | miR-510-3p          | 4 |
| <i>circKCNH8</i> | miR-5100            | 2 |

|                  |                                                                  |   |
|------------------|------------------------------------------------------------------|---|
| <i>circKCNH8</i> | miR-511-5p                                                       | 6 |
| <i>circKCNH8</i> | miR-516b-5p                                                      | 6 |
| <i>circKCNH8</i> | miR-517-5p                                                       | 1 |
| <i>circKCNH8</i> | miR-5186                                                         | 2 |
| <i>circKCNH8</i> | miR-5187-3p                                                      | 2 |
| <i>circKCNH8</i> | miR-5187-5p                                                      | 1 |
| <i>circKCNH8</i> | miR-518a-5p/527                                                  | 5 |
| <i>circKCNH8</i> | miR-5190                                                         | 1 |
| <i>circKCNH8</i> | miR-5192                                                         | 1 |
| <i>circKCNH8</i> | miR-5195-5p                                                      | 1 |
| <i>circKCNH8</i> | miR-5196-3p                                                      | 4 |
| <i>circKCNH8</i> | miR-5197-3p                                                      | 8 |
| <i>circKCNH8</i> | miR-519d-5p                                                      | 1 |
| <i>circKCNH8</i> | miR-522-3p                                                       | 1 |
| <i>circKCNH8</i> | miR-524-3p/525-3p                                                | 2 |
| <i>circKCNH8</i> | miR-532-3p                                                       | 1 |
| <i>circKCNH8</i> | miR-539-5p                                                       | 3 |
| <i>circKCNH8</i> | miR-542-3p                                                       | 1 |
| <i>circKCNH8</i> | miR-544a                                                         | 4 |
| <i>circKCNH8</i> | miR-544b                                                         | 2 |
| <i>circKCNH8</i> | miR-548aj-5p/548f-5p/548g-5p/548x-5p                             | 2 |
| <i>circKCNH8</i> | miR-548an                                                        | 1 |
| <i>circKCNH8</i> | miR-548ap-3p/548aa/548t-3p                                       | 1 |
| <i>circKCNH8</i> | miR-548as-3p                                                     | 1 |
| <i>circKCNH8</i> | miR-548au-3p                                                     | 1 |
| <i>circKCNH8</i> | miR-548av-5p/548k/8054                                           | 2 |
| <i>circKCNH8</i> | miR-548aw                                                        | 5 |
| <i>circKCNH8</i> | miR-548ay-3p/548at-3p                                            | 1 |
| <i>circKCNH8</i> | miR-548ay-5p/548au-5p/548as-5p/548ar-3p/548aq-5p/548ap-5p/548am- | 2 |
| <i>circKCNH8</i> | miR-548az-3p/548ar-3p/548a-3p/548e-3p/548f-3p                    | 2 |
| <i>circKCNH8</i> | miR-548b-3p                                                      | 2 |
| <i>circKCNH8</i> | miR-548c-3p                                                      | 1 |
| <i>circKCNH8</i> | miR-548e-5p                                                      | 3 |
| <i>circKCNH8</i> | miR-548l                                                         | 2 |
| <i>circKCNH8</i> | miR-548m                                                         | 1 |
| <i>circKCNH8</i> | miR-548q                                                         | 3 |
| <i>circKCNH8</i> | miR-548s                                                         | 2 |
| <i>circKCNH8</i> | miR-548u/7161-5p                                                 | 2 |

|                  |             |   |
|------------------|-------------|---|
| <i>circKCNH8</i> | miR-549a    | 2 |
| <i>circKCNH8</i> | miR-551b-5p | 2 |
| <i>circKCNH8</i> | miR-552-5p  | 1 |
| <i>circKCNH8</i> | miR-554     | 1 |
| <i>circKCNH8</i> | miR-555     | 2 |
| <i>circKCNH8</i> | miR-556-5p  | 2 |
| <i>circKCNH8</i> | miR-5571-3p | 1 |
| <i>circKCNH8</i> | miR-5572    | 3 |
| <i>circKCNH8</i> | miR-5580-3p | 1 |
| <i>circKCNH8</i> | miR-5580-5p | 2 |
| <i>circKCNH8</i> | miR-5581-3p | 2 |
| <i>circKCNH8</i> | miR-5582-3p | 1 |
| <i>circKCNH8</i> | miR-5582-5p | 2 |
| <i>circKCNH8</i> | miR-5583-3p | 1 |
| <i>circKCNH8</i> | miR-5584-3p | 2 |
| <i>circKCNH8</i> | miR-5585-3p | 2 |
| <i>circKCNH8</i> | miR-5586-5p | 3 |
| <i>circKCNH8</i> | miR-5587-3p | 4 |
| <i>circKCNH8</i> | miR-5589-3p | 2 |
| <i>circKCNH8</i> | miR-5590-5p | 1 |
| <i>circKCNH8</i> | miR-561-5p  | 2 |
| <i>circKCNH8</i> | miR-562     | 2 |
| <i>circKCNH8</i> | miR-567     | 2 |
| <i>circKCNH8</i> | miR-568     | 1 |
| <i>circKCNH8</i> | miR-5680    | 1 |
| <i>circKCNH8</i> | miR-5681b   | 1 |
| <i>circKCNH8</i> | miR-5682    | 1 |
| <i>circKCNH8</i> | miR-5687    | 1 |
| <i>circKCNH8</i> | miR-5689    | 4 |
| <i>circKCNH8</i> | miR-569     | 1 |
| <i>circKCNH8</i> | miR-5694    | 2 |
| <i>circKCNH8</i> | miR-5695    | 1 |
| <i>circKCNH8</i> | miR-5696    | 2 |
| <i>circKCNH8</i> | miR-570-3p  | 3 |
| <i>circKCNH8</i> | miR-5701    | 1 |
| <i>circKCNH8</i> | miR-577     | 2 |
| <i>circKCNH8</i> | miR-579-3p  | 2 |
| <i>circKCNH8</i> | miR-580-3p  | 1 |



|                  |                    |   |
|------------------|--------------------|---|
| <i>circKCNH8</i> | miR-580-5p         | 1 |
| <i>circKCNH8</i> | miR-583            | 4 |
| <i>circKCNH8</i> | miR-585-5p         | 1 |
| <i>circKCNH8</i> | miR-587            | 4 |
| <i>circKCNH8</i> | miR-588            | 2 |
| <i>circKCNH8</i> | miR-589-3p         | 3 |
| <i>circKCNH8</i> | miR-590-3p         | 1 |
| <i>circKCNH8</i> | miR-591            | 2 |
| <i>circKCNH8</i> | miR-593-3p         | 1 |
| <i>circKCNH8</i> | miR-593-5p         | 1 |
| <i>circKCNH8</i> | miR-595            | 1 |
| <i>circKCNH8</i> | miR-600            | 1 |
| <i>circKCNH8</i> | miR-601            | 3 |
| <i>circKCNH8</i> | miR-602            | 2 |
| <i>circKCNH8</i> | miR-604            | 1 |
| <i>circKCNH8</i> | miR-605-3p         | 1 |
| <i>circKCNH8</i> | miR-605-5p         | 2 |
| <i>circKCNH8</i> | miR-607            | 6 |
| <i>circKCNH8</i> | miR-6071           | 2 |
| <i>circKCNH8</i> | miR-6072/6891-3p   | 1 |
| <i>circKCNH8</i> | miR-6074           | 3 |
| <i>circKCNH8</i> | miR-6079           | 1 |
| <i>circKCNH8</i> | miR-608/4651       | 1 |
| <i>circKCNH8</i> | miR-6080           | 2 |
| <i>circKCNH8</i> | miR-6081           | 2 |
| <i>circKCNH8</i> | miR-6083           | 1 |
| <i>circKCNH8</i> | miR-6087           | 2 |
| <i>circKCNH8</i> | miR-609            | 1 |
| <i>circKCNH8</i> | miR-6090           | 1 |
| <i>circKCNH8</i> | miR-6124           | 2 |
| <i>circKCNH8</i> | miR-6126           | 1 |
| <i>circKCNH8</i> | miR-6128           | 3 |
| <i>circKCNH8</i> | miR-6132/6836-5p   | 2 |
| <i>circKCNH8</i> | miR-615-3p         | 2 |
| <i>circKCNH8</i> | miR-6165           | 2 |
| <i>circKCNH8</i> | miR-617            | 1 |
| <i>circKCNH8</i> | miR-619-5p/6506-5p | 1 |
| <i>circKCNH8</i> | miR-622            | 2 |

|                  |                 |   |
|------------------|-----------------|---|
| <i>circKCNH8</i> | miR-626/6876-3p | 5 |
| <i>circKCNH8</i> | miR-628-5p      | 2 |
| <i>circKCNH8</i> | miR-631/3661    | 2 |
| <i>circKCNH8</i> | miR-636         | 1 |
| <i>circKCNH8</i> | miR-637         | 1 |
| <i>circKCNH8</i> | miR-641/3617-5p | 1 |
| <i>circKCNH8</i> | miR-642a-5p     | 1 |
| <i>circKCNH8</i> | miR-642b-5p     | 1 |
| <i>circKCNH8</i> | miR-646         | 1 |
| <i>circKCNH8</i> | miR-647         | 1 |
| <i>circKCNH8</i> | miR-648         | 4 |
| <i>circKCNH8</i> | miR-6500-3p     | 1 |
| <i>circKCNH8</i> | miR-6501-3p     | 1 |
| <i>circKCNH8</i> | miR-6504-3p     | 1 |
| <i>circKCNH8</i> | miR-6505-3p     | 1 |
| <i>circKCNH8</i> | miR-6505-5p     | 2 |
| <i>circKCNH8</i> | miR-6507-3p     | 2 |
| <i>circKCNH8</i> | miR-651-3p      | 2 |
| <i>circKCNH8</i> | miR-6510-5p     | 2 |
| <i>circKCNH8</i> | miR-6513-3p     | 5 |
| <i>circKCNH8</i> | miR-6513-5p     | 3 |
| <i>circKCNH8</i> | miR-6514-3p     | 1 |
| <i>circKCNH8</i> | miR-6514-5p     | 4 |
| <i>circKCNH8</i> | miR-654-3p      | 1 |
| <i>circKCNH8</i> | miR-654-5p      | 1 |
| <i>circKCNH8</i> | miR-655-5p      | 3 |
| <i>circKCNH8</i> | miR-659-3p      | 1 |
| <i>circKCNH8</i> | miR-662         | 1 |
| <i>circKCNH8</i> | miR-664a-3p     | 1 |
| <i>circKCNH8</i> | miR-6716-5p     | 2 |
| <i>circKCNH8</i> | miR-6719-3p     | 1 |
| <i>circKCNH8</i> | miR-6720-5p     | 1 |
| <i>circKCNH8</i> | miR-6722-5p     | 2 |
| <i>circKCNH8</i> | miR-6728-3p     | 2 |
| <i>circKCNH8</i> | miR-6728-5p     | 1 |
| <i>circKCNH8</i> | miR-6729-3p     | 2 |
| <i>circKCNH8</i> | miR-6730-3p     | 1 |
| <i>circKCNH8</i> | miR-6731-3p     | 2 |

|                  |                             |   |
|------------------|-----------------------------|---|
| <i>circKCNH8</i> | miR-6733-3p                 | 2 |
| <i>circKCNH8</i> | miR-6735-3p                 | 2 |
| <i>circKCNH8</i> | miR-6737-5p/6812-5p/6819-5p | 2 |
| <i>circKCNH8</i> | miR-6738-3p                 | 4 |
| <i>circKCNH8</i> | miR-6740-3p                 | 2 |
| <i>circKCNH8</i> | miR-6740-5p                 | 2 |
| <i>circKCNH8</i> | miR-6742-3p                 | 1 |
| <i>circKCNH8</i> | miR-6744-5p                 | 3 |
| <i>circKCNH8</i> | miR-6747-5p                 | 1 |
| <i>circKCNH8</i> | miR-6749-5p                 | 1 |
| <i>circKCNH8</i> | miR-675-3p                  | 3 |
| <i>circKCNH8</i> | miR-6750-3p                 | 2 |
| <i>circKCNH8</i> | miR-6753-5p                 | 3 |
| <i>circKCNH8</i> | miR-6755-3p                 | 1 |
| <i>circKCNH8</i> | miR-6757-3p                 | 2 |
| <i>circKCNH8</i> | miR-6758-5p/6856-5p         | 2 |
| <i>circKCNH8</i> | miR-6759-3p                 | 1 |
| <i>circKCNH8</i> | miR-6760-3p                 | 5 |
| <i>circKCNH8</i> | miR-6762-3p                 | 1 |
| <i>circKCNH8</i> | miR-6765-3p                 | 1 |
| <i>circKCNH8</i> | miR-6765-5p                 | 3 |
| <i>circKCNH8</i> | miR-6768-3p                 | 1 |
| <i>circKCNH8</i> | miR-6769a-3p                | 2 |
| <i>circKCNH8</i> | miR-6769a-5p/6769b-5p       | 1 |
| <i>circKCNH8</i> | miR-6770-5p                 | 2 |
| <i>circKCNH8</i> | miR-6771-3p                 | 1 |
| <i>circKCNH8</i> | miR-6772-5p                 | 1 |
| <i>circKCNH8</i> | miR-6773-3p                 | 4 |
| <i>circKCNH8</i> | miR-6776-5p                 | 1 |
| <i>circKCNH8</i> | miR-6780a-3p                | 4 |
| <i>circKCNH8</i> | miR-6780b-3p                | 2 |
| <i>circKCNH8</i> | miR-6787-3p                 | 1 |
| <i>circKCNH8</i> | miR-6792-5p                 | 1 |
| <i>circKCNH8</i> | miR-6793-3p                 | 1 |
| <i>circKCNH8</i> | miR-6796-3p                 | 1 |
| <i>circKCNH8</i> | miR-6808-3p                 | 3 |
| <i>circKCNH8</i> | miR-6809-5p                 | 2 |
| <i>circKCNH8</i> | miR-6814-5p                 | 2 |

|                  |                     |   |
|------------------|---------------------|---|
| <i>circKCNH8</i> | miR-6819-3p/6877-3p | 1 |
| <i>circKCNH8</i> | miR-6820-5p         | 1 |
| <i>circKCNH8</i> | miR-6826-3p         | 3 |
| <i>circKCNH8</i> | miR-6827-5p         | 2 |
| <i>circKCNH8</i> | miR-6828-3p         | 2 |
| <i>circKCNH8</i> | miR-6830-3p         | 6 |
| <i>circKCNH8</i> | miR-6830-5p         | 3 |
| <i>circKCNH8</i> | miR-6832-3p         | 2 |
| <i>circKCNH8</i> | miR-6832-5p         | 2 |
| <i>circKCNH8</i> | miR-6838-3p         | 2 |
| <i>circKCNH8</i> | miR-6839-3p         | 1 |
| <i>circKCNH8</i> | miR-6840-5p         | 2 |
| <i>circKCNH8</i> | miR-6842-3p         | 1 |
| <i>circKCNH8</i> | miR-6843-3p/6848-3p | 1 |
| <i>circKCNH8</i> | miR-6845-3p         | 1 |
| <i>circKCNH8</i> | miR-6847-3p         | 1 |
| <i>circKCNH8</i> | miR-6852-5p         | 1 |
| <i>circKCNH8</i> | miR-6853-3p         | 2 |
| <i>circKCNH8</i> | miR-6854-3p         | 1 |
| <i>circKCNH8</i> | miR-6854-5p         | 1 |
| <i>circKCNH8</i> | miR-6857-3p         | 2 |
| <i>circKCNH8</i> | miR-6861-5p         | 1 |
| <i>circKCNH8</i> | miR-6863            | 1 |
| <i>circKCNH8</i> | miR-6864-5p         | 1 |
| <i>circKCNH8</i> | miR-6866-5p         | 2 |
| <i>circKCNH8</i> | miR-6868-3p         | 1 |
| <i>circKCNH8</i> | miR-6868-5p         | 2 |
| <i>circKCNH8</i> | miR-6871-3p         | 2 |
| <i>circKCNH8</i> | miR-6872-3p         | 2 |
| <i>circKCNH8</i> | miR-6873-5p         | 2 |
| <i>circKCNH8</i> | miR-6874-5p         | 2 |
| <i>circKCNH8</i> | miR-6878-3p         | 2 |
| <i>circKCNH8</i> | miR-6881-3p         | 4 |
| <i>circKCNH8</i> | miR-6881-5p         | 1 |
| <i>circKCNH8</i> | miR-6885-3p         | 1 |
| <i>circKCNH8</i> | miR-6888-5p         | 1 |
| <i>circKCNH8</i> | miR-6892-3p         | 1 |
| <i>circKCNH8</i> | miR-6892-5p         | 1 |

|                  |             |   |
|------------------|-------------|---|
| <i>circKCNH8</i> | miR-6894-3p | 1 |
| <i>circKCNH8</i> | miR-6894-5p | 1 |
| <i>circKCNH8</i> | miR-6895-3p | 1 |
| <i>circKCNH8</i> | miR-7-3p    | 1 |
| <i>circKCNH8</i> | miR-7109-3p | 2 |
| <i>circKCNH8</i> | miR-711     | 1 |
| <i>circKCNH8</i> | miR-7111-3p | 4 |
| <i>circKCNH8</i> | miR-7150    | 1 |
| <i>circKCNH8</i> | miR-7152-5p | 1 |
| <i>circKCNH8</i> | miR-7153-3p | 2 |
| <i>circKCNH8</i> | miR-7154-3p | 1 |
| <i>circKCNH8</i> | miR-7154-5p | 3 |
| <i>circKCNH8</i> | miR-7155-5p | 1 |
| <i>circKCNH8</i> | miR-7156-3p | 2 |
| <i>circKCNH8</i> | miR-7161-3p | 3 |
| <i>circKCNH8</i> | miR-7162-3p | 2 |
| <i>circKCNH8</i> | miR-744-3p  | 1 |
| <i>circKCNH8</i> | miR-758-3p  | 4 |
| <i>circKCNH8</i> | miR-758-5p  | 1 |
| <i>circKCNH8</i> | miR-759     | 2 |
| <i>circKCNH8</i> | miR-7641    | 1 |
| <i>circKCNH8</i> | miR-765     | 1 |
| <i>circKCNH8</i> | miR-766-5p  | 1 |
| <i>circKCNH8</i> | miR-767-5p  | 3 |
| <i>circKCNH8</i> | miR-769-5p  | 2 |
| <i>circKCNH8</i> | miR-770-5p  | 3 |
| <i>circKCNH8</i> | miR-7843-3p | 1 |
| <i>circKCNH8</i> | miR-7845-5p | 4 |
| <i>circKCNH8</i> | miR-7855-5p | 2 |
| <i>circKCNH8</i> | miR-7856-5p | 2 |
| <i>circKCNH8</i> | miR-7974    | 1 |
| <i>circKCNH8</i> | miR-7975    | 1 |
| <i>circKCNH8</i> | miR-7978    | 3 |
| <i>circKCNH8</i> | miR-8055    | 1 |
| <i>circKCNH8</i> | miR-8056    | 1 |
| <i>circKCNH8</i> | miR-8060    | 2 |
| <i>circKCNH8</i> | miR-8062    | 4 |
| <i>circKCNH8</i> | miR-8075    | 1 |

|                  |                              |   |
|------------------|------------------------------|---|
| <i>circKCNH8</i> | miR-8076                     | 1 |
| <i>circKCNH8</i> | miR-8078                     | 1 |
| <i>circKCNH8</i> | miR-8081                     | 3 |
| <i>circKCNH8</i> | miR-8084                     | 1 |
| <i>circKCNH8</i> | miR-873-5p.1                 | 1 |
| <i>circKCNH8</i> | miR-873-5p.2                 | 1 |
| <i>circKCNH8</i> | miR-874-5p                   | 1 |
| <i>circKCNH8</i> | miR-875-5p                   | 1 |
| <i>circKCNH8</i> | miR-877-5p                   | 2 |
| <i>circKCNH8</i> | miR-885-3p                   | 3 |
| <i>circKCNH8</i> | miR-887-5p                   | 3 |
| <i>circKCNH8</i> | miR-889-3p                   | 2 |
| <i>circKCNH8</i> | miR-890                      | 2 |
| <i>circKCNH8</i> | miR-891a-3p                  | 1 |
| <i>circKCNH8</i> | miR-892a                     | 4 |
| <i>circKCNH8</i> | miR-920/4300/5591-5p/6726-5p | 1 |
| <i>circKCNH8</i> | miR-921                      | 2 |
| <i>circKCNH8</i> | miR-922                      | 5 |
| <i>circKCNH8</i> | miR-92a-2-5p                 | 1 |
| <i>circKCNH8</i> | miR-93-3p                    | 1 |
| <i>circKCNH8</i> | miR-936                      | 1 |
| <i>circKCNH8</i> | miR-939-3p                   | 1 |
| <i>circKCNH8</i> | miR-940/6808-5p/6893-5p      | 3 |
| <i>circKCNH8</i> | miR-943                      | 3 |
| <i>circKCNH8</i> | miR-944                      | 3 |
| <i>circKCNH8</i> | miR-96-5p/1271-5p            | 2 |
| <i>circKCNH8</i> | miR-99-3p                    | 1 |
| <i>circKCNN2</i> | miR-100-3p                   | 1 |
| <i>circKCNN2</i> | miR-101-3p.2                 | 1 |
| <i>circKCNN2</i> | miR-103a-2-5p                | 1 |
| <i>circKCNN2</i> | miR-1226-3p                  | 1 |
| <i>circKCNN2</i> | miR-1227-5p                  | 1 |
| <i>circKCNN2</i> | miR-1228-3p                  | 1 |
| <i>circKCNN2</i> | miR-124-3p.1                 | 1 |
| <i>circKCNN2</i> | miR-124-5p                   | 1 |
| <i>circKCNN2</i> | miR-1245b-3p                 | 1 |
| <i>circKCNN2</i> | miR-1253                     | 1 |
| <i>circKCNN2</i> | miR-1255a/1255b-5p           | 1 |

|                  |                                 |   |
|------------------|---------------------------------|---|
| <i>circKCNN2</i> | miR-1257                        | 1 |
| <i>circKCNN2</i> | miR-1264                        | 1 |
| <i>circKCNN2</i> | miR-1273g-5p                    | 1 |
| <i>circKCNN2</i> | miR-1323                        | 1 |
| <i>circKCNN2</i> | miR-1343-3p                     | 1 |
| <i>circKCNN2</i> | miR-135-5p                      | 1 |
| <i>circKCNN2</i> | miR-136-5p                      | 1 |
| <i>circKCNN2</i> | miR-140-5p                      | 1 |
| <i>circKCNN2</i> | miR-142-5p                      | 1 |
| <i>circKCNN2</i> | miR-145-3p                      | 1 |
| <i>circKCNN2</i> | miR-145-5p                      | 1 |
| <i>circKCNN2</i> | miR-16-1-3p                     | 1 |
| <i>circKCNN2</i> | miR-1827                        | 1 |
| <i>circKCNN2</i> | miR-1910-5p                     | 1 |
| <i>circKCNN2</i> | miR-1911-5p                     | 1 |
| <i>circKCNN2</i> | miR-1915-3p/6764-5p             | 1 |
| <i>circKCNN2</i> | miR-200ab-5p                    | 1 |
| <i>circKCNN2</i> | miR-200c-5p/550a-3p             | 1 |
| <i>circKCNN2</i> | miR-202-3p                      | 1 |
| <i>circKCNN2</i> | miR-203a-5p                     | 1 |
| <i>circKCNN2</i> | miR-2115-3p                     | 1 |
| <i>circKCNN2</i> | miR-223-5p                      | 1 |
| <i>circKCNN2</i> | miR-224-5p                      | 1 |
| <i>circKCNN2</i> | miR-2392                        | 1 |
| <i>circKCNN2</i> | miR-26-3p                       | 1 |
| <i>circKCNN2</i> | miR-29b-1-5p                    | 1 |
| <i>circKCNN2</i> | miR-302-3p/372-3p/373-3p/520-3p | 1 |
| <i>circKCNN2</i> | miR-302c-3p.2/520-3p            | 1 |
| <i>circKCNN2</i> | miR-3074-5p                     | 1 |
| <i>circKCNN2</i> | miR-31-3p                       | 1 |
| <i>circKCNN2</i> | miR-31-5p                       | 1 |
| <i>circKCNN2</i> | miR-3115                        | 1 |
| <i>circKCNN2</i> | miR-3125/3916/6859-5p           | 1 |
| <i>circKCNN2</i> | miR-3128                        | 1 |
| <i>circKCNN2</i> | miR-3150b-3p                    | 1 |
| <i>circKCNN2</i> | miR-3154                        | 1 |
| <i>circKCNN2</i> | miR-3163                        | 1 |
| <i>circKCNN2</i> | miR-3184-3p                     | 1 |

|                  |                           |   |
|------------------|---------------------------|---|
| <i>circKCNN2</i> | miR-3185                  | 1 |
| <i>circKCNN2</i> | miR-323a-5p               | 1 |
| <i>circKCNN2</i> | miR-323b-5p/410-5p/494-5p | 1 |
| <i>circKCNN2</i> | miR-326                   | 1 |
| <i>circKCNN2</i> | miR-329-3p/362-3p         | 1 |
| <i>circKCNN2</i> | miR-330-3p.2              | 1 |
| <i>circKCNN2</i> | miR-335-5p                | 1 |
| <i>circKCNN2</i> | miR-34a-3p                | 1 |
| <i>circKCNN2</i> | miR-3607-3p               | 1 |
| <i>circKCNN2</i> | miR-3607-5p               | 1 |
| <i>circKCNN2</i> | miR-3611                  | 1 |
| <i>circKCNN2</i> | miR-3612                  | 1 |
| <i>circKCNN2</i> | miR-3617-3p               | 1 |
| <i>circKCNN2</i> | miR-3653-3p               | 1 |
| <i>circKCNN2</i> | miR-3658                  | 1 |
| <i>circKCNN2</i> | miR-3664-5p               | 1 |
| <i>circKCNN2</i> | miR-3675-5p               | 1 |
| <i>circKCNN2</i> | miR-369-3p                | 1 |
| <i>circKCNN2</i> | miR-3691-5p               | 1 |
| <i>circKCNN2</i> | miR-3714                  | 1 |
| <i>circKCNN2</i> | miR-374-5p                | 1 |
| <i>circKCNN2</i> | miR-378g                  | 1 |
| <i>circKCNN2</i> | miR-3910                  | 1 |
| <i>circKCNN2</i> | miR-3917                  | 1 |
| <i>circKCNN2</i> | miR-3924                  | 1 |
| <i>circKCNN2</i> | miR-3925-3p               | 1 |
| <i>circKCNN2</i> | miR-3938                  | 1 |
| <i>circKCNN2</i> | miR-3945                  | 2 |
| <i>circKCNN2</i> | miR-3976                  | 1 |
| <i>circKCNN2</i> | miR-3977                  | 1 |
| <i>circKCNN2</i> | miR-423-3p                | 1 |
| <i>circKCNN2</i> | miR-424-3p                | 1 |
| <i>circKCNN2</i> | miR-4253/6862-5p          | 2 |
| <i>circKCNN2</i> | miR-4266                  | 1 |
| <i>circKCNN2</i> | miR-4275                  | 1 |
| <i>circKCNN2</i> | miR-4276                  | 1 |
| <i>circKCNN2</i> | miR-4277                  | 1 |
| <i>circKCNN2</i> | miR-432-3p                | 1 |



|                  |                             |   |
|------------------|-----------------------------|---|
| <i>circKCNN2</i> | miR-4326                    | 1 |
| <i>circKCNN2</i> | miR-4422                    | 1 |
| <i>circKCNN2</i> | miR-4434/4516/5703          | 1 |
| <i>circKCNN2</i> | miR-4457                    | 1 |
| <i>circKCNN2</i> | miR-4477a                   | 1 |
| <i>circKCNN2</i> | miR-4486                    | 1 |
| <i>circKCNN2</i> | miR-4493                    | 1 |
| <i>circKCNN2</i> | miR-4495                    | 1 |
| <i>circKCNN2</i> | miR-4501                    | 1 |
| <i>circKCNN2</i> | miR-450b-3p/769-3p          | 1 |
| <i>circKCNN2</i> | miR-4511                    | 1 |
| <i>circKCNN2</i> | miR-452-3p                  | 1 |
| <i>circKCNN2</i> | miR-4522                    | 1 |
| <i>circKCNN2</i> | miR-455-3p.1                | 1 |
| <i>circKCNN2</i> | miR-4645-3p                 | 1 |
| <i>circKCNN2</i> | miR-4670-3p                 | 1 |
| <i>circKCNN2</i> | miR-4678                    | 1 |
| <i>circKCNN2</i> | miR-4686                    | 1 |
| <i>circKCNN2</i> | miR-4695-5p                 | 1 |
| <i>circKCNN2</i> | miR-4704-3p                 | 1 |
| <i>circKCNN2</i> | miR-4705                    | 1 |
| <i>circKCNN2</i> | miR-4709-3p                 | 1 |
| <i>circKCNN2</i> | miR-4711-5p                 | 1 |
| <i>circKCNN2</i> | miR-4712-3p                 | 1 |
| <i>circKCNN2</i> | miR-4714-5p                 | 1 |
| <i>circKCNN2</i> | miR-4716-5p                 | 1 |
| <i>circKCNN2</i> | miR-4720-5p/4799-3p/5588-5p | 1 |
| <i>circKCNN2</i> | miR-4726-3p                 | 1 |
| <i>circKCNN2</i> | miR-4733-3p                 | 1 |
| <i>circKCNN2</i> | miR-4746-3p                 | 1 |
| <i>circKCNN2</i> | miR-4752                    | 1 |
| <i>circKCNN2</i> | miR-4773                    | 1 |
| <i>circKCNN2</i> | miR-4777-5p                 | 1 |
| <i>circKCNN2</i> | miR-4779                    | 1 |
| <i>circKCNN2</i> | miR-486-3p                  | 1 |
| <i>circKCNN2</i> | miR-495-3p                  | 1 |
| <i>circKCNN2</i> | miR-499a-3p/499b-3p         | 1 |
| <i>circKCNN2</i> | miR-5007-5p                 | 1 |

|                  |                                                                  |   |
|------------------|------------------------------------------------------------------|---|
| <i>circKCNN2</i> | miR-5089-5p                                                      | 1 |
| <i>circKCNN2</i> | miR-5092                                                         | 1 |
| <i>circKCNN2</i> | miR-5094                                                         | 1 |
| <i>circKCNN2</i> | miR-5096                                                         | 1 |
| <i>circKCNN2</i> | miR-5100                                                         | 1 |
| <i>circKCNN2</i> | miR-512-3p                                                       | 1 |
| <i>circKCNN2</i> | miR-513b-5p                                                      | 1 |
| <i>circKCNN2</i> | miR-514a-5p                                                      | 1 |
| <i>circKCNN2</i> | miR-515-5p/519e-5p                                               | 1 |
| <i>circKCNN2</i> | miR-5187-5p                                                      | 1 |
| <i>circKCNN2</i> | miR-518c-5p                                                      | 1 |
| <i>circKCNN2</i> | miR-518d-5p/519-5p                                               | 1 |
| <i>circKCNN2</i> | miR-519-3p                                                       | 1 |
| <i>circKCNN2</i> | miR-5190                                                         | 1 |
| <i>circKCNN2</i> | miR-519d-5p                                                      | 1 |
| <i>circKCNN2</i> | miR-520g-5p                                                      | 1 |
| <i>circKCNN2</i> | miR-543                                                          | 1 |
| <i>circKCNN2</i> | miR-548ac/548bb-3p/548d-3p/548h-3p/548z                          |   |
| <i>circKCNN2</i> | miR-548ad-3p                                                     | 1 |
| <i>circKCNN2</i> | miR-548ap-3p/548aa/548t-3p                                       | 1 |
| <i>circKCNN2</i> | miR-548aq-3p/548am-3p/548aj-3p/548ah13p/548ae-3p/548j-3p/548x-3p |   |
| <i>circKCNN2</i> | miR-548as-3p                                                     | 1 |
| <i>circKCNN2</i> | miR-548at-5p                                                     | 1 |
| <i>circKCNN2</i> | miR-548ay-3p/548at-3p                                            | 1 |
| <i>circKCNN2</i> | miR-548az-5p/548t-5p                                             | 1 |
| <i>circKCNN2</i> | miR-548b-3p                                                      | 1 |
| <i>circKCNN2</i> | miR-548e-5p                                                      | 1 |
| <i>circKCNN2</i> | miR-548n                                                         | 1 |
| <i>circKCNN2</i> | miR-5581-3p                                                      | 2 |
| <i>circKCNN2</i> | miR-5585-3p                                                      | 1 |
| <i>circKCNN2</i> | miR-561-3p                                                       | 1 |
| <i>circKCNN2</i> | miR-568                                                          | 1 |
| <i>circKCNN2</i> | miR-5682                                                         | 1 |
| <i>circKCNN2</i> | miR-5692a                                                        | 1 |
| <i>circKCNN2</i> | miR-5692bc                                                       | 1 |
| <i>circKCNN2</i> | miR-5695                                                         | 1 |
| <i>circKCNN2</i> | miR-573/3616-5p                                                  | 1 |
| <i>circKCNN2</i> | miR-574-3p                                                       | 1 |

|                  |                                      |   |
|------------------|--------------------------------------|---|
| <i>circKCNN2</i> | miR-577                              | 1 |
| <i>circKCNN2</i> | miR-582-5p                           | 1 |
| <i>circKCNN2</i> | miR-585-5p                           | 1 |
| <i>circKCNN2</i> | miR-603                              | 1 |
| <i>circKCNN2</i> | miR-605-3p                           | 1 |
| <i>circKCNN2</i> | miR-6071                             | 1 |
| <i>circKCNN2</i> | miR-6076/6797-3p                     | 1 |
| <i>circKCNN2</i> | miR-6082                             | 1 |
| <i>circKCNN2</i> | miR-612/1285-3p/3187-5p/5189-5p/6860 | 1 |
| <i>circKCNN2</i> | miR-616-3p                           | 1 |
| <i>circKCNN2</i> | miR-629-3p                           | 1 |
| <i>circKCNN2</i> | miR-6507-3p                          | 1 |
| <i>circKCNN2</i> | miR-665                              | 1 |
| <i>circKCNN2</i> | miR-6728-5p                          | 1 |
| <i>circKCNN2</i> | miR-6731-3p                          | 1 |
| <i>circKCNN2</i> | miR-6740-3p                          | 1 |
| <i>circKCNN2</i> | miR-6742-3p                          | 1 |
| <i>circKCNN2</i> | miR-6744-5p                          | 1 |
| <i>circKCNN2</i> | miR-6749-5p                          | 1 |
| <i>circKCNN2</i> | miR-676-5p                           | 1 |
| <i>circKCNN2</i> | miR-6764-3p/6824-3p                  | 1 |
| <i>circKCNN2</i> | miR-6770-5p                          | 1 |
| <i>circKCNN2</i> | miR-6772-3p                          | 2 |
| <i>circKCNN2</i> | miR-6781-5p                          | 1 |
| <i>circKCNN2</i> | miR-6786-5p                          | 1 |
| <i>circKCNN2</i> | miR-6796-3p                          | 1 |
| <i>circKCNN2</i> | miR-6809-5p                          | 1 |
| <i>circKCNN2</i> | miR-6820-5p                          | 1 |
| <i>circKCNN2</i> | miR-6828-3p                          | 1 |
| <i>circKCNN2</i> | miR-6833-5p                          | 1 |
| <i>circKCNN2</i> | miR-6840-3p                          | 1 |
| <i>circKCNN2</i> | miR-6847-3p                          | 1 |
| <i>circKCNN2</i> | miR-6852-5p                          | 1 |
| <i>circKCNN2</i> | miR-6866-5p                          | 1 |
| <i>circKCNN2</i> | miR-6868-5p                          | 1 |
| <i>circKCNN2</i> | miR-6871-5p                          | 1 |
| <i>circKCNN2</i> | miR-6872-3p                          | 1 |
| <i>circKCNN2</i> | miR-6877-5p                          | 1 |

|                  |                     |   |
|------------------|---------------------|---|
| <i>circKCNN2</i> | miR-6885-3p         | 1 |
| <i>circKCNN2</i> | miR-6888-5p         | 1 |
| <i>circKCNN2</i> | miR-6890-5p         | 1 |
| <i>circKCNN2</i> | miR-7112-3p         | 1 |
| <i>circKCNN2</i> | miR-7151-5p         | 1 |
| <i>circKCNN2</i> | miR-7152-5p         | 1 |
| <i>circKCNN2</i> | miR-764             | 1 |
| <i>circKCNN2</i> | miR-766-3p          | 1 |
| <i>circKCNN2</i> | miR-767-3p          | 1 |
| <i>circKCNN2</i> | miR-7977            | 1 |
| <i>circKCNN2</i> | miR-8056            | 1 |
| <i>circKCNN2</i> | miR-8064            | 1 |
| <i>circKCNN2</i> | miR-8485            | 1 |
| <i>circKCNN2</i> | miR-876-3p          | 1 |
| <i>circKCNN2</i> | miR-877-5p          | 1 |
| <i>circKCNN2</i> | miR-889-3p          | 1 |
| <i>circKCNN2</i> | miR-889-5p          | 1 |
| <i>circKCNN2</i> | miR-924             | 1 |
| <i>circKCNN2</i> | miR-939-3p          | 1 |
| <i>circKCNN2</i> | miR-944             | 1 |
| <i>circKCNN2</i> | miR-99-3p           | 1 |
| <i>circKDM8</i>  | let-7-5p/98-5p      | 2 |
| <i>circKDM8</i>  | miR-101-3p.2        | 1 |
| <i>circKDM8</i>  | miR-103a-2-5p       | 3 |
| <i>circKDM8</i>  | miR-103b            | 1 |
| <i>circKDM8</i>  | miR-106a-3p         | 2 |
| <i>circKDM8</i>  | miR-10a-3p          | 1 |
| <i>circKDM8</i>  | miR-1178-3p         | 8 |
| <i>circKDM8</i>  | miR-1178-5p         | 4 |
| <i>circKDM8</i>  | miR-1179            | 1 |
| <i>circKDM8</i>  | miR-1180-5p         | 1 |
| <i>circKDM8</i>  | miR-1182            | 4 |
| <i>circKDM8</i>  | miR-1184            | 2 |
| <i>circKDM8</i>  | miR-1202/3972       | 1 |
| <i>circKDM8</i>  | miR-1204            | 1 |
| <i>circKDM8</i>  | miR-1205            | 2 |
| <i>circKDM8</i>  | miR-1207-3p         | 2 |
| <i>circKDM8</i>  | miR-1207-5p/4763-3p | 2 |

|                 |                          |   |
|-----------------|--------------------------|---|
| <i>circKDM8</i> | miR-1224-3p              | 2 |
| <i>circKDM8</i> | miR-1224-5p              | 6 |
| <i>circKDM8</i> | miR-1226-3p              | 2 |
| <i>circKDM8</i> | miR-1226-5p              | 4 |
| <i>circKDM8</i> | miR-1227-3p              | 1 |
| <i>circKDM8</i> | miR-1227-5p              | 5 |
| <i>circKDM8</i> | miR-1229-3p              | 1 |
| <i>circKDM8</i> | miR-1233-3p              | 1 |
| <i>circKDM8</i> | miR-1233-5p/6778-5p      | 1 |
| <i>circKDM8</i> | miR-1236-5p              | 1 |
| <i>circKDM8</i> | miR-1238-3p              | 5 |
| <i>circKDM8</i> | miR-124-3p.2/506-3p      | 1 |
| <i>circKDM8</i> | miR-124-5p               | 4 |
| <i>circKDM8</i> | miR-1245b-5p             | 2 |
| <i>circKDM8</i> | miR-1247-3p              | 1 |
| <i>circKDM8</i> | miR-1249-3p              | 2 |
| <i>circKDM8</i> | miR-1249-5p/6797-5p      | 2 |
| <i>circKDM8</i> | miR-125-5p               | 3 |
| <i>circKDM8</i> | miR-1250-3p              | 2 |
| <i>circKDM8</i> | miR-1250-5p              | 2 |
| <i>circKDM8</i> | miR-1251-3p              | 8 |
| <i>circKDM8</i> | miR-1251-5p              | 5 |
| <i>circKDM8</i> | miR-1254/3116            | 2 |
| <i>circKDM8</i> | miR-125a-3p              | 1 |
| <i>circKDM8</i> | miR-126-5p               | 1 |
| <i>circKDM8</i> | miR-1261                 | 4 |
| <i>circKDM8</i> | miR-1262/4701-3p/6736-5p | 2 |
| <i>circKDM8</i> | miR-1264                 | 5 |
| <i>circKDM8</i> | miR-1266-5p/4518         | 3 |
| <i>circKDM8</i> | miR-1267                 | 3 |
| <i>circKDM8</i> | miR-1269                 | 1 |
| <i>circKDM8</i> | miR-127-5p               | 3 |
| <i>circKDM8</i> | miR-1270                 | 6 |
| <i>circKDM8</i> | miR-1273d                | 1 |
| <i>circKDM8</i> | miR-1273e                | 3 |
| <i>circKDM8</i> | miR-1273f                | 2 |
| <i>circKDM8</i> | miR-1273g-3p             | 4 |
| <i>circKDM8</i> | miR-1273g-5p             | 1 |

|                 |                     |    |
|-----------------|---------------------|----|
| <i>circKDM8</i> | miR-1273h-3p        | 12 |
| <i>circKDM8</i> | miR-1275/4665-5p    | 3  |
| <i>circKDM8</i> | miR-1277-3p         | 1  |
| <i>circKDM8</i> | miR-1278            | 4  |
| <i>circKDM8</i> | miR-128-3p          | 5  |
| <i>circKDM8</i> | miR-1281            | 1  |
| <i>circKDM8</i> | miR-1282            | 1  |
| <i>circKDM8</i> | miR-1283            | 1  |
| <i>circKDM8</i> | miR-1285-5p         | 1  |
| <i>circKDM8</i> | miR-1287-3p         | 1  |
| <i>circKDM8</i> | miR-1287-5p         | 3  |
| <i>circKDM8</i> | miR-1288-3p         | 10 |
| <i>circKDM8</i> | miR-129-3p          | 1  |
| <i>circKDM8</i> | miR-1291/6775-3p    | 1  |
| <i>circKDM8</i> | miR-1292-5p         | 1  |
| <i>circKDM8</i> | miR-1293/4483       | 1  |
| <i>circKDM8</i> | miR-1294            | 2  |
| <i>circKDM8</i> | miR-1295b-5p/1912   | 1  |
| <i>circKDM8</i> | miR-1298-3p         | 3  |
| <i>circKDM8</i> | miR-1298-5p         | 4  |
| <i>circKDM8</i> | miR-1299            | 3  |
| <i>circKDM8</i> | miR-1301-3p         | 8  |
| <i>circKDM8</i> | miR-1301-5p/6502-5p | 4  |
| <i>circKDM8</i> | miR-1302/4298       | 9  |
| <i>circKDM8</i> | miR-1304-3p         | 2  |
| <i>circKDM8</i> | miR-1304-5p         | 1  |
| <i>circKDM8</i> | miR-1306-5p         | 2  |
| <i>circKDM8</i> | miR-130b-5p         | 2  |
| <i>circKDM8</i> | miR-1323            | 3  |
| <i>circKDM8</i> | miR-1324            | 8  |
| <i>circKDM8</i> | miR-133a-3p.1       | 5  |
| <i>circKDM8</i> | miR-134-3p          | 1  |
| <i>circKDM8</i> | miR-134-5p          | 1  |
| <i>circKDM8</i> | miR-1343-3p         | 7  |
| <i>circKDM8</i> | miR-135b-3p         | 1  |
| <i>circKDM8</i> | miR-136-5p          | 1  |
| <i>circKDM8</i> | miR-138-2-3p        | 1  |
| <i>circKDM8</i> | miR-139-5p          | 1  |

|                 |                                      |   |
|-----------------|--------------------------------------|---|
| <i>circKDM8</i> | miR-140-3p.1                         | 1 |
| <i>circKDM8</i> | miR-140-3p.2                         | 2 |
| <i>circKDM8</i> | miR-140-5p                           | 1 |
| <i>circKDM8</i> | miR-142-5p                           | 2 |
| <i>circKDM8</i> | miR-143-3p                           | 2 |
| <i>circKDM8</i> | miR-145-3p                           | 2 |
| <i>circKDM8</i> | miR-146a-3p                          | 1 |
| <i>circKDM8</i> | miR-146b-3p                          | 2 |
| <i>circKDM8</i> | miR-1470                             | 1 |
| <i>circKDM8</i> | miR-147a                             | 6 |
| <i>circKDM8</i> | miR-148-3p/152-3p                    | 5 |
| <i>circKDM8</i> | miR-149-3p/4728-5p/6785-5p/6883-5p   | 1 |
| <i>circKDM8</i> | miR-149-5p                           | 1 |
| <i>circKDM8</i> | miR-15-5p/16-5p/195-5p/424-5p/497-5p | 1 |
| <i>circKDM8</i> | miR-153-3p                           | 1 |
| <i>circKDM8</i> | miR-153-5p                           | 3 |
| <i>circKDM8</i> | miR-1537-3p                          | 2 |
| <i>circKDM8</i> | miR-1539                             | 1 |
| <i>circKDM8</i> | miR-154-5p                           | 2 |
| <i>circKDM8</i> | miR-1587/3620-5p                     | 4 |
| <i>circKDM8</i> | miR-15b-3p                           | 3 |
| <i>circKDM8</i> | miR-17-3p                            | 2 |
| <i>circKDM8</i> | miR-18-5p                            | 1 |
| <i>circKDM8</i> | miR-181-3p/4420                      | 8 |
| <i>circKDM8</i> | miR-181-5p                           | 2 |
| <i>circKDM8</i> | miR-182-5p                           | 5 |
| <i>circKDM8</i> | miR-1825                             | 2 |
| <i>circKDM8</i> | miR-1827                             | 1 |
| <i>circKDM8</i> | miR-183-5p.2                         | 1 |
| <i>circKDM8</i> | miR-184                              | 4 |
| <i>circKDM8</i> | miR-185-3p                           | 5 |
| <i>circKDM8</i> | miR-185-5p                           | 9 |
| <i>circKDM8</i> | miR-186-5p                           | 1 |
| <i>circKDM8</i> | miR-188-5p                           | 1 |
| <i>circKDM8</i> | miR-18a-3p                           | 1 |
| <i>circKDM8</i> | miR-1910-3p/6511a-5p                 | 1 |
| <i>circKDM8</i> | miR-1911-3p                          | 1 |
| <i>circKDM8</i> | miR-1911-5p                          | 1 |

|                 |                     |   |
|-----------------|---------------------|---|
| <i>circKDM8</i> | miR-1914-5p         | 2 |
| <i>circKDM8</i> | miR-1915-3p/6764-5p | 1 |
| <i>circKDM8</i> | miR-1915-5p         | 3 |
| <i>circKDM8</i> | miR-192-3p          | 2 |
| <i>circKDM8</i> | miR-193a-5p         | 4 |
| <i>circKDM8</i> | miR-194-3p          | 2 |
| <i>circKDM8</i> | miR-194-5p          | 1 |
| <i>circKDM8</i> | miR-196-5p          | 1 |
| <i>circKDM8</i> | miR-196b-3p         | 2 |
| <i>circKDM8</i> | miR-197-5p/3132     | 1 |
| <i>circKDM8</i> | miR-1972            | 2 |
| <i>circKDM8</i> | miR-1976            | 6 |
| <i>circKDM8</i> | miR-199-5p          | 2 |
| <i>circKDM8</i> | miR-200c-5p/550a-3p | 1 |
| <i>circKDM8</i> | miR-203a-3p.1       | 2 |
| <i>circKDM8</i> | miR-203a-5p         | 1 |
| <i>circKDM8</i> | miR-203b-3p         | 5 |
| <i>circKDM8</i> | miR-203b-5p/6718-5p | 2 |
| <i>circKDM8</i> | miR-204-3p/4646-5p  | 9 |
| <i>circKDM8</i> | miR-205-3p          | 1 |
| <i>circKDM8</i> | miR-205-5p          | 1 |
| <i>circKDM8</i> | miR-208-5p          | 5 |
| <i>circKDM8</i> | miR-20a-3p          | 2 |
| <i>circKDM8</i> | miR-21-3p/3591-3p   | 1 |
| <i>circKDM8</i> | miR-21-5p/590-5p    | 1 |
| <i>circKDM8</i> | miR-211-3p          | 1 |
| <i>circKDM8</i> | miR-2110            | 2 |
| <i>circKDM8</i> | miR-212-5p          | 1 |
| <i>circKDM8</i> | miR-214-5p          | 1 |
| <i>circKDM8</i> | miR-215-3p          | 6 |
| <i>circKDM8</i> | miR-216b-3p         | 1 |
| <i>circKDM8</i> | miR-218-5p          | 3 |
| <i>circKDM8</i> | miR-22-3p           | 1 |
| <i>circKDM8</i> | miR-222-5p          | 1 |
| <i>circKDM8</i> | miR-223-3p          | 1 |
| <i>circKDM8</i> | miR-223-5p          | 4 |
| <i>circKDM8</i> | miR-2276-3p         | 2 |
| <i>circKDM8</i> | miR-2276-5p         | 1 |



|                 |                                              |   |
|-----------------|----------------------------------------------|---|
| <i>circKDM8</i> | miR-2277-3p                                  | 2 |
| <i>circKDM8</i> | miR-2278                                     | 1 |
| <i>circKDM8</i> | miR-23-3p                                    | 3 |
| <i>circKDM8</i> | miR-2355-5p                                  | 7 |
| <i>circKDM8</i> | miR-24-3p                                    | 6 |
| <i>circKDM8</i> | miR-2467-3p                                  | 8 |
| <i>circKDM8</i> | miR-2467-5p                                  | 1 |
| <i>circKDM8</i> | miR-25-3p/32-5p/92-3p/363-3p/367-3p          | 1 |
| <i>circKDM8</i> | miR-25-5p                                    | 1 |
| <i>circKDM8</i> | miR-2681-3p                                  | 1 |
| <i>circKDM8</i> | miR-2682-3p/6781-3p                          | 2 |
| <i>circKDM8</i> | miR-26b-3p                                   | 1 |
| <i>circKDM8</i> | miR-27-3p                                    | 1 |
| <i>circKDM8</i> | miR-27b-5p                                   | 1 |
| <i>circKDM8</i> | miR-28-3p                                    | 1 |
| <i>circKDM8</i> | miR-28-5p/708-5p                             | 2 |
| <i>circKDM8</i> | miR-2861                                     | 2 |
| <i>circKDM8</i> | miR-29-3p                                    | 1 |
| <i>circKDM8</i> | miR-2909                                     | 1 |
| <i>circKDM8</i> | miR-296-5p                                   | 1 |
| <i>circKDM8</i> | miR-298                                      | 3 |
| <i>circKDM8</i> | miR-299-3p                                   | 3 |
| <i>circKDM8</i> | miR-29b-2-5p                                 | 1 |
| <i>circKDM8</i> | miR-30-3p                                    | 2 |
| <i>circKDM8</i> | miR-30-5p                                    | 1 |
| <i>circKDM8</i> | miR-302b-5p/302d-5p                          | 2 |
| <i>circKDM8</i> | miR-302c-3p.2/520-3p                         | 5 |
| <i>circKDM8</i> | miR-302f                                     | 2 |
| <i>circKDM8</i> | miR-3064-3p                                  | 2 |
| <i>circKDM8</i> | miR-3064-5p                                  | 6 |
| <i>circKDM8</i> | miR-3065-5p                                  | 1 |
| <i>circKDM8</i> | miR-3074-5p                                  | 2 |
| <i>circKDM8</i> | miR-30b-3p/1273h-5p/3689-3p/6779-5p/6780a-5p |   |
| <i>circKDM8</i> | miR-30c-3p/6788-5p                           | 1 |
| <i>circKDM8</i> | miR-3117-3p                                  | 1 |
| <i>circKDM8</i> | miR-3120-5p                                  | 1 |
| <i>circKDM8</i> | miR-3121-3p                                  | 2 |
| <i>circKDM8</i> | miR-3121-5p                                  | 1 |

|                 |                          |   |
|-----------------|--------------------------|---|
| <i>circKDM8</i> | miR-3126-3p              | 3 |
| <i>circKDM8</i> | miR-3126-5p              | 2 |
| <i>circKDM8</i> | miR-3127-3p/6756-3p      | 4 |
| <i>circKDM8</i> | miR-3127-5p              | 3 |
| <i>circKDM8</i> | miR-3130-5p/4482-5p      | 1 |
| <i>circKDM8</i> | miR-3133                 | 1 |
| <i>circKDM8</i> | miR-3135b                | 3 |
| <i>circKDM8</i> | miR-3140-5p              | 3 |
| <i>circKDM8</i> | miR-3141                 | 2 |
| <i>circKDM8</i> | miR-3144-5p              | 3 |
| <i>circKDM8</i> | miR-3145-5p              | 6 |
| <i>circKDM8</i> | miR-3147                 | 3 |
| <i>circKDM8</i> | miR-3148                 | 6 |
| <i>circKDM8</i> | miR-3150a-3p             | 2 |
| <i>circKDM8</i> | miR-3150a-5p/3150b-5p    | 3 |
| <i>circKDM8</i> | miR-3150b-3p             | 1 |
| <i>circKDM8</i> | miR-3151-3p              | 2 |
| <i>circKDM8</i> | miR-3151-5p              | 5 |
| <i>circKDM8</i> | miR-3153/6733-5p/6739-5p | 1 |
| <i>circKDM8</i> | miR-3154                 | 1 |
| <i>circKDM8</i> | miR-3157-3p              | 1 |
| <i>circKDM8</i> | miR-3157-5p              | 2 |
| <i>circKDM8</i> | miR-3158-3p              | 1 |
| <i>circKDM8</i> | miR-3158-5p              | 2 |
| <i>circKDM8</i> | miR-3160-5p              | 2 |
| <i>circKDM8</i> | miR-3162-5p              | 1 |
| <i>circKDM8</i> | miR-3164                 | 1 |
| <i>circKDM8</i> | miR-3166                 | 5 |
| <i>circKDM8</i> | miR-3169                 | 7 |
| <i>circKDM8</i> | miR-3171                 | 4 |
| <i>circKDM8</i> | miR-3173-3p/6891-5p      | 1 |
| <i>circKDM8</i> | miR-3173-5p              | 2 |
| <i>circKDM8</i> | miR-3174                 | 2 |
| <i>circKDM8</i> | miR-3177-3p              | 2 |
| <i>circKDM8</i> | miR-3177-5p              | 4 |
| <i>circKDM8</i> | miR-3178                 | 2 |
| <i>circKDM8</i> | miR-3180-5p              | 1 |
| <i>circKDM8</i> | miR-3182                 | 2 |

|                 |                           |   |
|-----------------|---------------------------|---|
| <i>circKDM8</i> | miR-3183/4723-3p/6769b-3p | 2 |
| <i>circKDM8</i> | miR-3184-3p               | 5 |
| <i>circKDM8</i> | miR-3188                  | 1 |
| <i>circKDM8</i> | miR-3189-3p               | 1 |
| <i>circKDM8</i> | miR-3191-3p               | 3 |
| <i>circKDM8</i> | miR-3191-5p               | 4 |
| <i>circKDM8</i> | miR-3192-3p               | 1 |
| <i>circKDM8</i> | miR-3192-5p               | 9 |
| <i>circKDM8</i> | miR-3193                  | 1 |
| <i>circKDM8</i> | miR-3194-3p               | 1 |
| <i>circKDM8</i> | miR-3194-5p               | 4 |
| <i>circKDM8</i> | miR-3199/8052             | 5 |
| <i>circKDM8</i> | miR-3200-5p               | 2 |
| <i>circKDM8</i> | miR-3201/4791             | 4 |
| <i>circKDM8</i> | miR-320e                  | 4 |
| <i>circKDM8</i> | miR-323a-5p               | 1 |
| <i>circKDM8</i> | miR-323b-5p/410-5p/494-5p | 1 |
| <i>circKDM8</i> | miR-324-3p/1913           | 1 |
| <i>circKDM8</i> | miR-325                   | 1 |
| <i>circKDM8</i> | miR-329-3p/362-3p         | 3 |
| <i>circKDM8</i> | miR-329-5p                | 1 |
| <i>circKDM8</i> | miR-33-5p                 | 2 |
| <i>circKDM8</i> | miR-330-3p                | 1 |
| <i>circKDM8</i> | miR-330-3p.2              | 1 |
| <i>circKDM8</i> | miR-335-3p                | 1 |
| <i>circKDM8</i> | miR-335-5p                | 2 |
| <i>circKDM8</i> | miR-338-5p                | 1 |
| <i>circKDM8</i> | miR-33a-3p                | 1 |
| <i>circKDM8</i> | miR-33b-3p/515-3p/519e-3p | 1 |
| <i>circKDM8</i> | miR-34-5p/449-5p          | 1 |
| <i>circKDM8</i> | miR-340-3p/6827-3p        | 1 |
| <i>circKDM8</i> | miR-340-5p                | 1 |
| <i>circKDM8</i> | miR-342-5p/4664-5p        | 3 |
| <i>circKDM8</i> | miR-345-3p                | 3 |
| <i>circKDM8</i> | miR-34a-3p                | 1 |
| <i>circKDM8</i> | miR-34b-5p/449c-5p        | 1 |
| <i>circKDM8</i> | miR-3529-3p               | 2 |
| <i>circKDM8</i> | miR-3605-3p               | 1 |

|                 |                       |    |
|-----------------|-----------------------|----|
| <i>circKDM8</i> | miR-3606-5p           | 1  |
| <i>circKDM8</i> | miR-3607-3p           | 1  |
| <i>circKDM8</i> | miR-3607-5p           | 4  |
| <i>circKDM8</i> | miR-3613-3p           | 4  |
| <i>circKDM8</i> | miR-3613-5p           | 1  |
| <i>circKDM8</i> | miR-3614-3p           | 2  |
| <i>circKDM8</i> | miR-3617-3p           | 1  |
| <i>circKDM8</i> | miR-3619-3p           | 4  |
| <i>circKDM8</i> | miR-3620-3p           | 8  |
| <i>circKDM8</i> | miR-3621              | 1  |
| <i>circKDM8</i> | miR-3622a-3p/3622b-3p | 1  |
| <i>circKDM8</i> | miR-3622a-5p          | 1  |
| <i>circKDM8</i> | miR-3622b-5p          | 6  |
| <i>circKDM8</i> | miR-363-5p/6745       | 1  |
| <i>circKDM8</i> | miR-3648              | 1  |
| <i>circKDM8</i> | miR-3649              | 5  |
| <i>circKDM8</i> | miR-3650              | 1  |
| <i>circKDM8</i> | miR-3652/4430         | 4  |
| <i>circKDM8</i> | miR-3653-3p           | 1  |
| <i>circKDM8</i> | miR-3653-5p           | 6  |
| <i>circKDM8</i> | miR-3656              | 1  |
| <i>circKDM8</i> | miR-365a-5p/365b-5p   | 5  |
| <i>circKDM8</i> | miR-3662              | 4  |
| <i>circKDM8</i> | miR-3663-3p           | 1  |
| <i>circKDM8</i> | miR-3664-3p           | 3  |
| <i>circKDM8</i> | miR-3664-5p           | 2  |
| <i>circKDM8</i> | miR-3665              | 2  |
| <i>circKDM8</i> | miR-3667-3p           | 1  |
| <i>circKDM8</i> | miR-367-5p            | 3  |
| <i>circKDM8</i> | miR-3670              | 1  |
| <i>circKDM8</i> | miR-3672/6864-3p      | 2  |
| <i>circKDM8</i> | miR-3674              | 2  |
| <i>circKDM8</i> | miR-3675-5p           | 1  |
| <i>circKDM8</i> | miR-3678-3p           | 12 |
| <i>circKDM8</i> | miR-3680-3p           | 8  |
| <i>circKDM8</i> | miR-3684              | 1  |
| <i>circKDM8</i> | miR-3688-5p           | 2  |
| <i>circKDM8</i> | miR-3689d/6851-5p     | 2  |

|                 |                           |   |
|-----------------|---------------------------|---|
| <i>circKDM8</i> | miR-369-3p                | 5 |
| <i>circKDM8</i> | miR-3690                  | 8 |
| <i>circKDM8</i> | miR-3691-3p               | 1 |
| <i>circKDM8</i> | miR-3692-3p               | 6 |
| <i>circKDM8</i> | miR-3692-5p               | 4 |
| <i>circKDM8</i> | miR-370-3p                | 8 |
| <i>circKDM8</i> | miR-371-5p                | 2 |
| <i>circKDM8</i> | miR-371a-3p               | 1 |
| <i>circKDM8</i> | miR-371b-3p               | 1 |
| <i>circKDM8</i> | miR-371b-5p/373-5p/616-5p | 2 |
| <i>circKDM8</i> | miR-372-5p                | 2 |
| <i>circKDM8</i> | miR-374c-3p               | 2 |
| <i>circKDM8</i> | miR-375                   | 2 |
| <i>circKDM8</i> | miR-376b-5p/376c-5p       | 4 |
| <i>circKDM8</i> | miR-376c-3p               | 2 |
| <i>circKDM8</i> | miR-377-5p/6086           | 1 |
| <i>circKDM8</i> | miR-378-3p                | 1 |
| <i>circKDM8</i> | miR-378g                  | 4 |
| <i>circKDM8</i> | miR-378j/6839-5p          | 4 |
| <i>circKDM8</i> | miR-379-5p                | 1 |
| <i>circKDM8</i> | miR-383-5p.2              | 1 |
| <i>circKDM8</i> | miR-3907                  | 1 |
| <i>circKDM8</i> | miR-3911                  | 5 |
| <i>circKDM8</i> | miR-3913-3p               | 1 |
| <i>circKDM8</i> | miR-3914                  | 8 |
| <i>circKDM8</i> | miR-3915                  | 6 |
| <i>circKDM8</i> | miR-3917                  | 3 |
| <i>circKDM8</i> | miR-3918                  | 6 |
| <i>circKDM8</i> | miR-3919                  | 7 |
| <i>circKDM8</i> | miR-3920                  | 1 |
| <i>circKDM8</i> | miR-3922-5p               | 5 |
| <i>circKDM8</i> | miR-3925-3p               | 1 |
| <i>circKDM8</i> | miR-3927-3p/6831-5p       | 1 |
| <i>circKDM8</i> | miR-3928-3p               | 6 |
| <i>circKDM8</i> | miR-3928-5p/6806-3p       | 1 |
| <i>circKDM8</i> | miR-3929/4419b/4478       | 5 |
| <i>circKDM8</i> | miR-3934-5p               | 1 |
| <i>circKDM8</i> | miR-3936                  | 1 |

|                 |                           |    |
|-----------------|---------------------------|----|
| <i>circKDM8</i> | miR-3937                  | 1  |
| <i>circKDM8</i> | miR-3938                  | 1  |
| <i>circKDM8</i> | miR-3940-5p/4507          | 1  |
| <i>circKDM8</i> | miR-3941                  | 5  |
| <i>circKDM8</i> | miR-3942-3p               | 2  |
| <i>circKDM8</i> | miR-3944-5p               | 12 |
| <i>circKDM8</i> | miR-3945                  | 3  |
| <i>circKDM8</i> | miR-3975                  | 1  |
| <i>circKDM8</i> | miR-3977                  | 3  |
| <i>circKDM8</i> | miR-409-5p                | 1  |
| <i>circKDM8</i> | miR-412-3p/6754-3p        | 8  |
| <i>circKDM8</i> | miR-423-5p                | 1  |
| <i>circKDM8</i> | miR-425-3p                | 1  |
| <i>circKDM8</i> | miR-4251                  | 3  |
| <i>circKDM8</i> | miR-4252                  | 2  |
| <i>circKDM8</i> | miR-4253/6862-5p          | 3  |
| <i>circKDM8</i> | miR-4254                  | 8  |
| <i>circKDM8</i> | miR-4260                  | 1  |
| <i>circKDM8</i> | miR-4261                  | 1  |
| <i>circKDM8</i> | miR-4263                  | 3  |
| <i>circKDM8</i> | miR-4265/4296/4322        | 1  |
| <i>circKDM8</i> | miR-4266                  | 1  |
| <i>circKDM8</i> | miR-4267                  | 6  |
| <i>circKDM8</i> | miR-4268                  | 2  |
| <i>circKDM8</i> | miR-4269/6715b-5p         | 1  |
| <i>circKDM8</i> | miR-4270/4441/6754-5p     | 1  |
| <i>circKDM8</i> | miR-4271/4725-3p/6780b-5p | 1  |
| <i>circKDM8</i> | miR-4277                  | 4  |
| <i>circKDM8</i> | miR-4279                  | 5  |
| <i>circKDM8</i> | miR-4281                  | 3  |
| <i>circKDM8</i> | miR-4282                  | 1  |
| <i>circKDM8</i> | miR-4283                  | 6  |
| <i>circKDM8</i> | miR-4284                  | 6  |
| <i>circKDM8</i> | miR-4287/4685-3p          | 10 |
| <i>circKDM8</i> | miR-4289                  | 1  |
| <i>circKDM8</i> | miR-4290                  | 1  |
| <i>circKDM8</i> | miR-4291                  | 1  |
| <i>circKDM8</i> | miR-4292/6791-5p          | 4  |

|                 |                                    |   |
|-----------------|------------------------------------|---|
| <i>circKDM8</i> | miR-4293                           | 1 |
| <i>circKDM8</i> | miR-4297/5581-5p                   | 1 |
| <i>circKDM8</i> | miR-4303                           | 2 |
| <i>circKDM8</i> | miR-4304                           | 7 |
| <i>circKDM8</i> | miR-4307                           | 1 |
| <i>circKDM8</i> | miR-4308                           | 4 |
| <i>circKDM8</i> | miR-4312                           | 1 |
| <i>circKDM8</i> | miR-4314                           | 4 |
| <i>circKDM8</i> | miR-4315                           | 2 |
| <i>circKDM8</i> | miR-4316                           | 2 |
| <i>circKDM8</i> | miR-4321                           | 1 |
| <i>circKDM8</i> | miR-4324                           | 1 |
| <i>circKDM8</i> | miR-4326                           | 1 |
| <i>circKDM8</i> | miR-4327                           | 2 |
| <i>circKDM8</i> | miR-4329                           | 3 |
| <i>circKDM8</i> | miR-433-3p                         | 6 |
| <i>circKDM8</i> | miR-433-5p                         | 2 |
| <i>circKDM8</i> | miR-4330                           | 1 |
| <i>circKDM8</i> | miR-4419a/4510/6127/6129/6130/6133 | 2 |
| <i>circKDM8</i> | miR-4421/5699-3p                   | 1 |
| <i>circKDM8</i> | miR-4422                           | 1 |
| <i>circKDM8</i> | miR-4425                           | 3 |
| <i>circKDM8</i> | miR-4428                           | 1 |
| <i>circKDM8</i> | miR-4433a-3p                       | 2 |
| <i>circKDM8</i> | miR-4436b-5p                       | 7 |
| <i>circKDM8</i> | miR-4437                           | 5 |
| <i>circKDM8</i> | miR-4438                           | 3 |
| <i>circKDM8</i> | miR-4443                           | 3 |
| <i>circKDM8</i> | miR-4446-3p                        | 1 |
| <i>circKDM8</i> | miR-4446-5p                        | 3 |
| <i>circKDM8</i> | miR-4447/4472                      | 5 |
| <i>circKDM8</i> | miR-4448                           | 2 |
| <i>circKDM8</i> | miR-4450                           | 2 |
| <i>circKDM8</i> | miR-4451                           | 1 |
| <i>circKDM8</i> | miR-4455                           | 1 |
| <i>circKDM8</i> | miR-4457                           | 1 |
| <i>circKDM8</i> | miR-4459                           | 2 |
| <i>circKDM8</i> | miR-4468                           | 2 |

|                 |                   |    |
|-----------------|-------------------|----|
| <i>circKDM8</i> | miR-4469          | 10 |
| <i>circKDM8</i> | miR-4471/8059     | 1  |
| <i>circKDM8</i> | miR-4473          | 1  |
| <i>circKDM8</i> | miR-4474-3p       | 5  |
| <i>circKDM8</i> | miR-4475          | 1  |
| <i>circKDM8</i> | miR-4476/6876-5p  | 1  |
| <i>circKDM8</i> | miR-4477b         | 1  |
| <i>circKDM8</i> | miR-448           | 1  |
| <i>circKDM8</i> | miR-4486          | 4  |
| <i>circKDM8</i> | miR-4489          | 6  |
| <i>circKDM8</i> | miR-4491/4657     | 3  |
| <i>circKDM8</i> | miR-4496          | 3  |
| <i>circKDM8</i> | miR-449c-3p       | 2  |
| <i>circKDM8</i> | miR-4502          | 10 |
| <i>circKDM8</i> | miR-4503          | 2  |
| <i>circKDM8</i> | miR-4505/5787     | 4  |
| <i>circKDM8</i> | miR-4506          | 2  |
| <i>circKDM8</i> | miR-450a-2-3p     | 1  |
| <i>circKDM8</i> | miR-450b-5p       | 8  |
| <i>circKDM8</i> | miR-4512          | 6  |
| <i>circKDM8</i> | miR-4513/6855-3p  | 1  |
| <i>circKDM8</i> | miR-4514/4692     | 1  |
| <i>circKDM8</i> | miR-4515          | 10 |
| <i>circKDM8</i> | miR-4517          | 1  |
| <i>circKDM8</i> | miR-451b          | 1  |
| <i>circKDM8</i> | miR-452-3p        | 4  |
| <i>circKDM8</i> | miR-452-5p/892-3p | 3  |
| <i>circKDM8</i> | miR-4522          | 1  |
| <i>circKDM8</i> | miR-4523          | 1  |
| <i>circKDM8</i> | miR-4524-5p       | 3  |
| <i>circKDM8</i> | miR-4524a-3p      | 6  |
| <i>circKDM8</i> | miR-4524b-3p      | 6  |
| <i>circKDM8</i> | miR-4527/6503-5p  | 5  |
| <i>circKDM8</i> | miR-4528          | 1  |
| <i>circKDM8</i> | miR-4531          | 6  |
| <i>circKDM8</i> | miR-4536-3p       | 3  |
| <i>circKDM8</i> | miR-4537          | 1  |
| <i>circKDM8</i> | miR-4539          | 1  |



|                 |                          |   |
|-----------------|--------------------------|---|
| <i>circKDM8</i> | miR-4636                 | 5 |
| <i>circKDM8</i> | miR-4638-3p              | 1 |
| <i>circKDM8</i> | miR-4639-3p              | 2 |
| <i>circKDM8</i> | miR-4639-5p              | 3 |
| <i>circKDM8</i> | miR-4642                 | 3 |
| <i>circKDM8</i> | miR-4643                 | 3 |
| <i>circKDM8</i> | miR-4645-3p              | 4 |
| <i>circKDM8</i> | miR-4645-5p/4673         | 1 |
| <i>circKDM8</i> | miR-4648                 | 1 |
| <i>circKDM8</i> | miR-4649-3p              | 1 |
| <i>circKDM8</i> | miR-4650-3p              | 1 |
| <i>circKDM8</i> | miR-4650-5p              | 2 |
| <i>circKDM8</i> | miR-4652-3p              | 2 |
| <i>circKDM8</i> | miR-4652-5p              | 3 |
| <i>circKDM8</i> | miR-4654/4769-5p         | 1 |
| <i>circKDM8</i> | miR-4656                 | 7 |
| <i>circKDM8</i> | miR-466                  | 6 |
| <i>circKDM8</i> | miR-4660                 | 7 |
| <i>circKDM8</i> | miR-4661-3p              | 3 |
| <i>circKDM8</i> | miR-4661-5p              | 3 |
| <i>circKDM8</i> | miR-4663                 | 1 |
| <i>circKDM8</i> | miR-4666b                | 5 |
| <i>circKDM8</i> | miR-4667-3p              | 1 |
| <i>circKDM8</i> | miR-4667-5p/4700-5p/8089 | 3 |
| <i>circKDM8</i> | miR-4668-3p              | 1 |
| <i>circKDM8</i> | miR-4668-5p              | 1 |
| <i>circKDM8</i> | miR-4670-3p              | 2 |
| <i>circKDM8</i> | miR-4670-5p              | 1 |
| <i>circKDM8</i> | miR-4671-3p              | 1 |
| <i>circKDM8</i> | miR-4672                 | 5 |
| <i>circKDM8</i> | miR-4674                 | 4 |
| <i>circKDM8</i> | miR-4675/4741            | 7 |
| <i>circKDM8</i> | miR-4677-3p              | 1 |
| <i>circKDM8</i> | miR-4678                 | 2 |
| <i>circKDM8</i> | miR-4679                 | 1 |
| <i>circKDM8</i> | miR-4680-5p              | 5 |
| <i>circKDM8</i> | miR-4684-3p              | 2 |
| <i>circKDM8</i> | miR-4685-5p/6837-5p      | 1 |

|                 |                                  |   |
|-----------------|----------------------------------|---|
| <i>circKDM8</i> | miR-4687-3p                      | 6 |
| <i>circKDM8</i> | miR-4687-5p                      | 1 |
| <i>circKDM8</i> | miR-4688/6743-5p                 | 1 |
| <i>circKDM8</i> | miR-4689/6858-5p                 | 6 |
| <i>circKDM8</i> | miR-4691-3p                      | 7 |
| <i>circKDM8</i> | miR-4691-5p/6792-3p              | 1 |
| <i>circKDM8</i> | miR-4694-3p                      | 1 |
| <i>circKDM8</i> | miR-4695-3p                      | 5 |
| <i>circKDM8</i> | miR-4695-5p                      | 1 |
| <i>circKDM8</i> | miR-4697-3p                      | 1 |
| <i>circKDM8</i> | miR-4698                         | 1 |
| <i>circKDM8</i> | miR-4699-3p                      | 1 |
| <i>circKDM8</i> | miR-4700-3p                      | 1 |
| <i>circKDM8</i> | miR-4703-3p                      | 2 |
| <i>circKDM8</i> | miR-4704-3p                      | 1 |
| <i>circKDM8</i> | miR-4705                         | 1 |
| <i>circKDM8</i> | miR-4708-3p                      | 1 |
| <i>circKDM8</i> | miR-4708-5p                      | 2 |
| <i>circKDM8</i> | miR-4709-5p                      | 2 |
| <i>circKDM8</i> | miR-4710                         | 1 |
| <i>circKDM8</i> | miR-4711-3p                      | 1 |
| <i>circKDM8</i> | miR-4712-3p                      | 2 |
| <i>circKDM8</i> | miR-4713-3p                      | 1 |
| <i>circKDM8</i> | miR-4713-5p                      | 1 |
| <i>circKDM8</i> | miR-4714-5p                      | 2 |
| <i>circKDM8</i> | miR-4715-3p                      | 2 |
| <i>circKDM8</i> | miR-4717-3p                      | 1 |
| <i>circKDM8</i> | miR-4717-5p                      | 1 |
| <i>circKDM8</i> | miR-4719                         | 1 |
| <i>circKDM8</i> | miR-4720-3p                      | 2 |
| <i>circKDM8</i> | miR-4723-5p/5698/6870-5p/7111-5p | 3 |
| <i>circKDM8</i> | miR-4724-3p                      | 1 |
| <i>circKDM8</i> | miR-4724-5p                      | 1 |
| <i>circKDM8</i> | miR-4726-3p                      | 1 |
| <i>circKDM8</i> | miR-4727-5p                      | 2 |
| <i>circKDM8</i> | miR-4728-3p                      | 2 |
| <i>circKDM8</i> | miR-4729                         | 2 |
| <i>circKDM8</i> | miR-4731-3p/4801                 | 2 |

|                 |                     |    |
|-----------------|---------------------|----|
| <i>circKDM8</i> | miR-4731-5p         | 4  |
| <i>circKDM8</i> | miR-4732-3p         | 3  |
| <i>circKDM8</i> | miR-4733-3p         | 2  |
| <i>circKDM8</i> | miR-4733-5p         | 2  |
| <i>circKDM8</i> | miR-4734            | 1  |
| <i>circKDM8</i> | miR-4736            | 2  |
| <i>circKDM8</i> | miR-4738-5p         | 4  |
| <i>circKDM8</i> | miR-4739            | 1  |
| <i>circKDM8</i> | miR-4740-3p         | 1  |
| <i>circKDM8</i> | miR-4740-5p         | 10 |
| <i>circKDM8</i> | miR-4742-5p         | 1  |
| <i>circKDM8</i> | miR-4743-3p         | 2  |
| <i>circKDM8</i> | miR-4743-5p         | 5  |
| <i>circKDM8</i> | miR-4753-3p         | 1  |
| <i>circKDM8</i> | miR-4755-3p         | 2  |
| <i>circKDM8</i> | miR-4755-5p/5006-3p | 7  |
| <i>circKDM8</i> | miR-4756-3p         | 7  |
| <i>circKDM8</i> | miR-4757-5p/6744-3p | 3  |
| <i>circKDM8</i> | miR-4759            | 7  |
| <i>circKDM8</i> | miR-4760-3p         | 2  |
| <i>circKDM8</i> | miR-4761-5p         | 3  |
| <i>circKDM8</i> | miR-4762-3p         | 1  |
| <i>circKDM8</i> | miR-4765            | 1  |
| <i>circKDM8</i> | miR-4766-3p         | 2  |
| <i>circKDM8</i> | miR-4766-5p         | 6  |
| <i>circKDM8</i> | miR-4768-3p         | 2  |
| <i>circKDM8</i> | miR-4768-5p/6833-3p | 2  |
| <i>circKDM8</i> | miR-4769-3p/6817-5p | 2  |
| <i>circKDM8</i> | miR-4771            | 5  |
| <i>circKDM8</i> | miR-4772-3p         | 2  |
| <i>circKDM8</i> | miR-4773            | 1  |
| <i>circKDM8</i> | miR-4776-3p         | 2  |
| <i>circKDM8</i> | miR-4777-3p         | 4  |
| <i>circKDM8</i> | miR-4778-3p         | 2  |
| <i>circKDM8</i> | miR-4778-5p         | 2  |
| <i>circKDM8</i> | miR-4779            | 1  |
| <i>circKDM8</i> | miR-4780            | 3  |
| <i>circKDM8</i> | miR-4781-5p         | 1  |

|                 |                             |   |
|-----------------|-----------------------------|---|
| <i>circKDM8</i> | miR-4782-5p/5706            | 3 |
| <i>circKDM8</i> | miR-4786-3p                 | 2 |
| <i>circKDM8</i> | miR-4786-5p                 | 1 |
| <i>circKDM8</i> | miR-4787-5p                 | 2 |
| <i>circKDM8</i> | miR-4789-3p                 | 3 |
| <i>circKDM8</i> | miR-4790-3p                 | 1 |
| <i>circKDM8</i> | miR-4790-5p                 | 2 |
| <i>circKDM8</i> | miR-4792                    | 1 |
| <i>circKDM8</i> | miR-4793-5p                 | 3 |
| <i>circKDM8</i> | miR-4795-3p                 | 1 |
| <i>circKDM8</i> | miR-4802-5p                 | 5 |
| <i>circKDM8</i> | miR-4803                    | 1 |
| <i>circKDM8</i> | miR-4804-3p                 | 2 |
| <i>circKDM8</i> | miR-485-5p                  | 1 |
| <i>circKDM8</i> | miR-486-5p                  | 1 |
| <i>circKDM8</i> | miR-488-3p                  | 3 |
| <i>circKDM8</i> | miR-490-3p                  | 2 |
| <i>circKDM8</i> | miR-490-5p                  | 5 |
| <i>circKDM8</i> | miR-491-5p                  | 5 |
| <i>circKDM8</i> | miR-492                     | 2 |
| <i>circKDM8</i> | miR-493-3p                  | 1 |
| <i>circKDM8</i> | miR-494-3p                  | 3 |
| <i>circKDM8</i> | miR-495-3p                  | 3 |
| <i>circKDM8</i> | miR-497-3p                  | 4 |
| <i>circKDM8</i> | miR-4999-3p                 | 1 |
| <i>circKDM8</i> | miR-499a-3p/499b-3p         | 1 |
| <i>circKDM8</i> | miR-5000-3p                 | 1 |
| <i>circKDM8</i> | miR-5001-3p                 | 2 |
| <i>circKDM8</i> | miR-5002-3p                 | 1 |
| <i>circKDM8</i> | miR-5003-3p                 | 1 |
| <i>circKDM8</i> | miR-5006-5p                 | 1 |
| <i>circKDM8</i> | miR-5008-3p/6737-3p/7157-3p | 5 |
| <i>circKDM8</i> | miR-5008-5p                 | 1 |
| <i>circKDM8</i> | miR-5009-5p/8058            | 1 |
| <i>circKDM8</i> | miR-500b-3p                 | 2 |
| <i>circKDM8</i> | miR-501-3p/502-3p           | 2 |
| <i>circKDM8</i> | miR-5010-5p                 | 3 |
| <i>circKDM8</i> | miR-5011-3p                 | 5 |

|                 |                     |   |
|-----------------|---------------------|---|
| <i>circKDM8</i> | miR-502-5p          | 1 |
| <i>circKDM8</i> | miR-503-5p          | 1 |
| <i>circKDM8</i> | miR-504-3p          | 1 |
| <i>circKDM8</i> | miR-505-5p          | 1 |
| <i>circKDM8</i> | miR-506-5p          | 2 |
| <i>circKDM8</i> | miR-507/557         | 8 |
| <i>circKDM8</i> | miR-508-5p          | 6 |
| <i>circKDM8</i> | miR-5088-5p         | 1 |
| <i>circKDM8</i> | miR-5089-3p         | 1 |
| <i>circKDM8</i> | miR-5093            | 1 |
| <i>circKDM8</i> | miR-5094            | 2 |
| <i>circKDM8</i> | miR-5095/7151-3p    | 1 |
| <i>circKDM8</i> | miR-5096            | 2 |
| <i>circKDM8</i> | miR-510-5p          | 1 |
| <i>circKDM8</i> | miR-511-3p          | 1 |
| <i>circKDM8</i> | miR-512-3p          | 5 |
| <i>circKDM8</i> | miR-513a-5p         | 1 |
| <i>circKDM8</i> | miR-513b-3p         | 1 |
| <i>circKDM8</i> | miR-513c-5p/514b-5p | 1 |
| <i>circKDM8</i> | miR-514a-5p         | 2 |
| <i>circKDM8</i> | miR-515-5p/519e-5p  | 1 |
| <i>circKDM8</i> | miR-516b-5p         | 3 |
| <i>circKDM8</i> | miR-517-5p          | 5 |
| <i>circKDM8</i> | miR-5186            | 1 |
| <i>circKDM8</i> | miR-5187-5p         | 1 |
| <i>circKDM8</i> | miR-5189-3p         | 2 |
| <i>circKDM8</i> | miR-5192            | 9 |
| <i>circKDM8</i> | miR-5193            | 3 |
| <i>circKDM8</i> | miR-5194            | 1 |
| <i>circKDM8</i> | miR-5195-5p         | 1 |
| <i>circKDM8</i> | miR-5196-3p         | 3 |
| <i>circKDM8</i> | miR-519d-5p         | 5 |
| <i>circKDM8</i> | miR-522-3p          | 1 |
| <i>circKDM8</i> | miR-524-3p/525-3p   | 1 |
| <i>circKDM8</i> | miR-532-5p          | 1 |
| <i>circKDM8</i> | miR-539-3p          | 5 |
| <i>circKDM8</i> | miR-539-5p          | 2 |
| <i>circKDM8</i> | miR-543             | 1 |

|                 |                                                                  |   |
|-----------------|------------------------------------------------------------------|---|
| <i>circKDM8</i> | miR-544a                                                         | 4 |
| <i>circKDM8</i> | miR-544b                                                         | 1 |
| <i>circKDM8</i> | miR-545-5p                                                       | 1 |
| <i>circKDM8</i> | miR-548ac/548bb-3p/548d-3p/548h-3p/548z                          | 1 |
| <i>circKDM8</i> | miR-548ai/548ag/548ba/570-5p                                     | 2 |
| <i>circKDM8</i> | miR-548ap-3p/548aa/548t-3p                                       | 4 |
| <i>circKDM8</i> | miR-548aq-3p/548am-3p/548aj-3p/548ah-3p/548ae-3p/548j-3p/548x-3p | 1 |
| <i>circKDM8</i> | miR-548as-3p                                                     | 4 |
| <i>circKDM8</i> | miR-548au-3p                                                     | 1 |
| <i>circKDM8</i> | miR-548av-3p                                                     | 3 |
| <i>circKDM8</i> | miR-548ay-3p/548at-3p                                            | 4 |
| <i>circKDM8</i> | miR-548az-3p/548ar-3p/548a-3p/548e-3p/548f-3p                    | 1 |
| <i>circKDM8</i> | miR-548c-3p                                                      | 3 |
| <i>circKDM8</i> | miR-548g-3p                                                      | 4 |
| <i>circKDM8</i> | miR-548p                                                         | 1 |
| <i>circKDM8</i> | miR-548u/7161-5p                                                 | 3 |
| <i>circKDM8</i> | miR-549a                                                         | 2 |
| <i>circKDM8</i> | miR-550b-3p                                                      | 2 |
| <i>circKDM8</i> | miR-551-3p                                                       | 1 |
| <i>circKDM8</i> | miR-551b-5p                                                      | 1 |
| <i>circKDM8</i> | miR-552-5p                                                       | 1 |
| <i>circKDM8</i> | miR-553                                                          | 1 |
| <i>circKDM8</i> | miR-556-3p                                                       | 2 |
| <i>circKDM8</i> | miR-5571-3p                                                      | 1 |
| <i>circKDM8</i> | miR-5572                                                         | 1 |
| <i>circKDM8</i> | miR-5579-3p                                                      | 1 |
| <i>circKDM8</i> | miR-5580-5p                                                      | 1 |
| <i>circKDM8</i> | miR-5582-3p                                                      | 3 |
| <i>circKDM8</i> | miR-5582-5p                                                      | 1 |
| <i>circKDM8</i> | miR-5583-3p                                                      | 1 |
| <i>circKDM8</i> | miR-5586-3p                                                      | 1 |
| <i>circKDM8</i> | miR-5587-5p                                                      | 2 |
| <i>circKDM8</i> | miR-5589-3p                                                      | 1 |
| <i>circKDM8</i> | miR-5589-5p                                                      | 4 |
| <i>circKDM8</i> | miR-561-5p                                                       | 7 |
| <i>circKDM8</i> | miR-5681a                                                        | 3 |
| <i>circKDM8</i> | miR-5681b                                                        | 1 |
| <i>circKDM8</i> | miR-5684                                                         | 1 |

|                 |                  |   |
|-----------------|------------------|---|
| <i>circKDM8</i> | miR-5690         | 1 |
| <i>circKDM8</i> | miR-5691         | 7 |
| <i>circKDM8</i> | miR-5692a        | 1 |
| <i>circKDM8</i> | miR-5692bc       | 5 |
| <i>circKDM8</i> | miR-5693         | 2 |
| <i>circKDM8</i> | miR-5694         | 1 |
| <i>circKDM8</i> | miR-5695         | 5 |
| <i>circKDM8</i> | miR-5696         | 3 |
| <i>circKDM8</i> | miR-570-3p       | 5 |
| <i>circKDM8</i> | miR-5707         | 1 |
| <i>circKDM8</i> | miR-574-3p       | 1 |
| <i>circKDM8</i> | miR-575/4676-5p  | 4 |
| <i>circKDM8</i> | miR-576-5p       | 3 |
| <i>circKDM8</i> | miR-579-3p       | 3 |
| <i>circKDM8</i> | miR-580-3p       | 3 |
| <i>circKDM8</i> | miR-582-3p       | 2 |
| <i>circKDM8</i> | miR-582-5p       | 1 |
| <i>circKDM8</i> | miR-586          | 1 |
| <i>circKDM8</i> | miR-589-3p       | 1 |
| <i>circKDM8</i> | miR-591          | 4 |
| <i>circKDM8</i> | miR-593-3p       | 1 |
| <i>circKDM8</i> | miR-593-5p       | 1 |
| <i>circKDM8</i> | miR-595          | 4 |
| <i>circKDM8</i> | miR-596          | 1 |
| <i>circKDM8</i> | miR-597-5p       | 2 |
| <i>circKDM8</i> | miR-600          | 1 |
| <i>circKDM8</i> | miR-603          | 3 |
| <i>circKDM8</i> | miR-604          | 7 |
| <i>circKDM8</i> | miR-6071         | 5 |
| <i>circKDM8</i> | miR-6072/6891-3p | 6 |
| <i>circKDM8</i> | miR-6076/6797-3p | 1 |
| <i>circKDM8</i> | miR-6078         | 1 |
| <i>circKDM8</i> | miR-608/4651     | 3 |
| <i>circKDM8</i> | miR-6080         | 2 |
| <i>circKDM8</i> | miR-6081         | 2 |
| <i>circKDM8</i> | miR-6084         | 2 |
| <i>circKDM8</i> | miR-6085/6813-5p | 1 |
| <i>circKDM8</i> | miR-6089         | 1 |

|                 |                                      |   |
|-----------------|--------------------------------------|---|
| <i>circKDM8</i> | miR-609                              | 1 |
| <i>circKDM8</i> | miR-6090                             | 1 |
| <i>circKDM8</i> | miR-612/1285-3p/3187-5p/5189-5p/6860 | 4 |
| <i>circKDM8</i> | miR-6124                             | 6 |
| <i>circKDM8</i> | miR-6128                             | 5 |
| <i>circKDM8</i> | miR-6134                             | 5 |
| <i>circKDM8</i> | miR-616-3p                           | 1 |
| <i>circKDM8</i> | miR-617                              | 1 |
| <i>circKDM8</i> | miR-619-5p/6506-5p                   | 9 |
| <i>circKDM8</i> | miR-622                              | 2 |
| <i>circKDM8</i> | miR-624-3p                           | 7 |
| <i>circKDM8</i> | miR-624-5p                           | 1 |
| <i>circKDM8</i> | miR-625-5p                           | 3 |
| <i>circKDM8</i> | miR-626/6876-3p                      | 2 |
| <i>circKDM8</i> | miR-627-3p                           | 1 |
| <i>circKDM8</i> | miR-628-3p                           | 1 |
| <i>circKDM8</i> | miR-628-5p                           | 7 |
| <i>circKDM8</i> | miR-630                              | 1 |
| <i>circKDM8</i> | miR-631/3661                         | 1 |
| <i>circKDM8</i> | miR-635/6774-5p                      | 2 |
| <i>circKDM8</i> | miR-636                              | 3 |
| <i>circKDM8</i> | miR-637                              | 3 |
| <i>circKDM8</i> | miR-638                              | 1 |
| <i>circKDM8</i> | miR-640                              | 1 |
| <i>circKDM8</i> | miR-641/3617-5p                      | 3 |
| <i>circKDM8</i> | miR-642-3p                           | 3 |
| <i>circKDM8</i> | miR-642a-5p                          | 5 |
| <i>circKDM8</i> | miR-642b-5p                          | 3 |
| <i>circKDM8</i> | miR-644a                             | 5 |
| <i>circKDM8</i> | miR-646                              | 1 |
| <i>circKDM8</i> | miR-647                              | 5 |
| <i>circKDM8</i> | miR-648                              | 3 |
| <i>circKDM8</i> | miR-649                              | 2 |
| <i>circKDM8</i> | miR-6501-3p                          | 2 |
| <i>circKDM8</i> | miR-6502-3p                          | 1 |
| <i>circKDM8</i> | miR-6503-3p                          | 1 |
| <i>circKDM8</i> | miR-6505-3p                          | 1 |
| <i>circKDM8</i> | miR-6505-5p                          | 3 |



|                 |                  |    |
|-----------------|------------------|----|
| <i>circKDM8</i> | miR-6507-5p      | 1  |
| <i>circKDM8</i> | miR-6508-5p/8067 | 1  |
| <i>circKDM8</i> | miR-6509-3p      | 7  |
| <i>circKDM8</i> | miR-651-3p       | 2  |
| <i>circKDM8</i> | miR-6511-3p      | 2  |
| <i>circKDM8</i> | miR-6512-5p      | 6  |
| <i>circKDM8</i> | miR-6513-3p      | 2  |
| <i>circKDM8</i> | miR-6514-3p      | 1  |
| <i>circKDM8</i> | miR-6514-5p      | 5  |
| <i>circKDM8</i> | miR-6515-5p      | 3  |
| <i>circKDM8</i> | miR-6516-5p      | 5  |
| <i>circKDM8</i> | miR-653-3p       | 8  |
| <i>circKDM8</i> | miR-654-5p       | 6  |
| <i>circKDM8</i> | miR-655-5p       | 1  |
| <i>circKDM8</i> | miR-656-5p       | 1  |
| <i>circKDM8</i> | miR-657          | 2  |
| <i>circKDM8</i> | miR-659-5p       | 2  |
| <i>circKDM8</i> | miR-660-3p       | 3  |
| <i>circKDM8</i> | miR-661          | 2  |
| <i>circKDM8</i> | miR-664a-5p/4794 | 1  |
| <i>circKDM8</i> | miR-665          | 1  |
| <i>circKDM8</i> | miR-668-3p       | 4  |
| <i>circKDM8</i> | miR-670-3p       | 5  |
| <i>circKDM8</i> | miR-670-5p       | 13 |
| <i>circKDM8</i> | miR-6715a-3p     | 4  |
| <i>circKDM8</i> | miR-6715b-3p     | 3  |
| <i>circKDM8</i> | miR-6720-5p      | 1  |
| <i>circKDM8</i> | miR-6728-3p      | 6  |
| <i>circKDM8</i> | miR-6729-3p      | 6  |
| <i>circKDM8</i> | miR-6730-5p      | 3  |
| <i>circKDM8</i> | miR-6731-5p/8085 | 1  |
| <i>circKDM8</i> | miR-6734-3p      | 1  |
| <i>circKDM8</i> | miR-6734-5p      | 4  |
| <i>circKDM8</i> | miR-6735-3p      | 1  |
| <i>circKDM8</i> | miR-6736-3p      | 1  |
| <i>circKDM8</i> | miR-6738-3p      | 4  |
| <i>circKDM8</i> | miR-6741-5p      | 2  |
| <i>circKDM8</i> | miR-6742-3p      | 5  |

|                 |                             |   |
|-----------------|-----------------------------|---|
| <i>circKDM8</i> | miR-6742-5p                 | 5 |
| <i>circKDM8</i> | miR-6743-3p                 | 1 |
| <i>circKDM8</i> | miR-6746-3p                 | 1 |
| <i>circKDM8</i> | miR-6746-5p                 | 1 |
| <i>circKDM8</i> | miR-6747-5p                 | 3 |
| <i>circKDM8</i> | miR-6748-3p                 | 1 |
| <i>circKDM8</i> | miR-6748-5p                 | 1 |
| <i>circKDM8</i> | miR-6749-3p                 | 1 |
| <i>circKDM8</i> | miR-6749-5p                 | 2 |
| <i>circKDM8</i> | miR-6750-3p                 | 2 |
| <i>circKDM8</i> | miR-6751-5p/6803-5p         | 3 |
| <i>circKDM8</i> | miR-6752-3p                 | 8 |
| <i>circKDM8</i> | miR-6752-5p/6842-5p/7110-5p | 2 |
| <i>circKDM8</i> | miR-6753-3p/7107-3p         | 5 |
| <i>circKDM8</i> | miR-6753-5p                 | 2 |
| <i>circKDM8</i> | miR-6756-5p/6766-5p         | 1 |
| <i>circKDM8</i> | miR-6758-3p                 | 7 |
| <i>circKDM8</i> | miR-6758-5p/6856-5p         | 4 |
| <i>circKDM8</i> | miR-6759-5p                 | 1 |
| <i>circKDM8</i> | miR-676-3p                  | 1 |
| <i>circKDM8</i> | miR-6760-5p                 | 1 |
| <i>circKDM8</i> | miR-6761-5p                 | 3 |
| <i>circKDM8</i> | miR-6762-3p                 | 7 |
| <i>circKDM8</i> | miR-6765-3p                 | 1 |
| <i>circKDM8</i> | miR-6765-5p                 | 2 |
| <i>circKDM8</i> | miR-6767-3p                 | 3 |
| <i>circKDM8</i> | miR-6768-5p                 | 5 |
| <i>circKDM8</i> | miR-6769a-5p/6769b-5p       | 6 |
| <i>circKDM8</i> | miR-6771-3p                 | 1 |
| <i>circKDM8</i> | miR-6771-5p                 | 1 |
| <i>circKDM8</i> | miR-6772-3p                 | 3 |
| <i>circKDM8</i> | miR-6772-5p                 | 1 |
| <i>circKDM8</i> | miR-6773-3p                 | 6 |
| <i>circKDM8</i> | miR-6776-3p                 | 4 |
| <i>circKDM8</i> | miR-6776-5p                 | 1 |
| <i>circKDM8</i> | miR-6777-3p                 | 1 |
| <i>circKDM8</i> | miR-6778-3p                 | 5 |
| <i>circKDM8</i> | miR-6779-3p                 | 1 |

|                 |                     |   |
|-----------------|---------------------|---|
| <i>circKDM8</i> | miR-6780b-3p        | 3 |
| <i>circKDM8</i> | miR-6781-5p         | 5 |
| <i>circKDM8</i> | miR-6782-3p         | 1 |
| <i>circKDM8</i> | miR-6782-5p         | 2 |
| <i>circKDM8</i> | miR-6783-5p         | 1 |
| <i>circKDM8</i> | miR-6784-3p/6862-3p | 2 |
| <i>circKDM8</i> | miR-6784-5p         | 2 |
| <i>circKDM8</i> | miR-6787-3p         | 1 |
| <i>circKDM8</i> | miR-6790-3p         | 1 |
| <i>circKDM8</i> | miR-6791-3p/6829-3p | 5 |
| <i>circKDM8</i> | miR-6793-3p         | 1 |
| <i>circKDM8</i> | miR-6793-5p         | 1 |
| <i>circKDM8</i> | miR-6794-3p         | 1 |
| <i>circKDM8</i> | miR-6796-5p         | 1 |
| <i>circKDM8</i> | miR-6798-5p         | 2 |
| <i>circKDM8</i> | miR-6799-5p         | 1 |
| <i>circKDM8</i> | miR-6801-5p         | 3 |
| <i>circKDM8</i> | miR-6802-3p         | 1 |
| <i>circKDM8</i> | miR-6804-3p         | 1 |
| <i>circKDM8</i> | miR-6804-5p         | 4 |
| <i>circKDM8</i> | miR-6809-3p         | 2 |
| <i>circKDM8</i> | miR-6810-5p         | 2 |
| <i>circKDM8</i> | miR-6811-3p         | 1 |
| <i>circKDM8</i> | miR-6814-5p         | 1 |
| <i>circKDM8</i> | miR-6815-5p/6865-5p | 7 |
| <i>circKDM8</i> | miR-6816-3p         | 6 |
| <i>circKDM8</i> | miR-6817-3p         | 2 |
| <i>circKDM8</i> | miR-6818-3p         | 1 |
| <i>circKDM8</i> | miR-6818-5p         | 6 |
| <i>circKDM8</i> | miR-6819-3p/6877-3p | 2 |
| <i>circKDM8</i> | miR-6820-5p         | 2 |
| <i>circKDM8</i> | miR-6821-3p         | 1 |
| <i>circKDM8</i> | miR-6826-3p         | 3 |
| <i>circKDM8</i> | miR-6826-5p         | 1 |
| <i>circKDM8</i> | miR-6827-5p         | 1 |
| <i>circKDM8</i> | miR-6828-3p         | 5 |
| <i>circKDM8</i> | miR-6829-5p         | 7 |
| <i>circKDM8</i> | miR-6830-5p         | 6 |

|                 |                     |   |
|-----------------|---------------------|---|
| <i>circKDM8</i> | miR-6832-3p         | 3 |
| <i>circKDM8</i> | miR-6834-5p         | 4 |
| <i>circKDM8</i> | miR-6835-5p         | 2 |
| <i>circKDM8</i> | miR-6836-3p         | 3 |
| <i>circKDM8</i> | miR-6837-3p         | 8 |
| <i>circKDM8</i> | miR-6838-3p         | 1 |
| <i>circKDM8</i> | miR-6839-3p         | 1 |
| <i>circKDM8</i> | miR-6840-3p         | 1 |
| <i>circKDM8</i> | miR-6841-3p         | 3 |
| <i>circKDM8</i> | miR-6842-3p         | 5 |
| <i>circKDM8</i> | miR-6843-3p/6848-3p | 1 |
| <i>circKDM8</i> | miR-6844            | 3 |
| <i>circKDM8</i> | miR-6846-3p         | 1 |
| <i>circKDM8</i> | miR-6847-3p         | 9 |
| <i>circKDM8</i> | miR-6851-3p         | 1 |
| <i>circKDM8</i> | miR-6852-5p         | 5 |
| <i>circKDM8</i> | miR-6853-5p         | 1 |
| <i>circKDM8</i> | miR-6856-3p         | 3 |
| <i>circKDM8</i> | miR-6857-3p         | 1 |
| <i>circKDM8</i> | miR-6857-5p         | 2 |
| <i>circKDM8</i> | miR-6858-3p         | 4 |
| <i>circKDM8</i> | miR-6859-3p         | 1 |
| <i>circKDM8</i> | miR-6861-3p         | 2 |
| <i>circKDM8</i> | miR-6861-5p         | 1 |
| <i>circKDM8</i> | miR-6867-3p         | 1 |
| <i>circKDM8</i> | miR-6867-5p         | 2 |
| <i>circKDM8</i> | miR-6869-3p         | 1 |
| <i>circKDM8</i> | miR-6870-3p         | 6 |
| <i>circKDM8</i> | miR-6871-3p         | 1 |
| <i>circKDM8</i> | miR-6871-5p         | 1 |
| <i>circKDM8</i> | miR-6872-3p         | 1 |
| <i>circKDM8</i> | miR-6873-5p         | 1 |
| <i>circKDM8</i> | miR-6877-5p         | 5 |
| <i>circKDM8</i> | miR-6878-5p         | 1 |
| <i>circKDM8</i> | miR-6880-3p         | 2 |
| <i>circKDM8</i> | miR-6881-5p         | 1 |
| <i>circKDM8</i> | miR-6882-3p         | 4 |
| <i>circKDM8</i> | miR-6884-3p         | 1 |

|                 |                           |    |
|-----------------|---------------------------|----|
| <i>circKDM8</i> | miR-6885-3p               | 8  |
| <i>circKDM8</i> | miR-6886-3p               | 2  |
| <i>circKDM8</i> | miR-6888-5p               | 2  |
| <i>circKDM8</i> | miR-6889-3p               | 5  |
| <i>circKDM8</i> | miR-6890-3p               | 3  |
| <i>circKDM8</i> | miR-6890-5p               | 1  |
| <i>circKDM8</i> | miR-6892-3p               | 1  |
| <i>circKDM8</i> | miR-6894-3p               | 1  |
| <i>circKDM8</i> | miR-6894-5p               | 1  |
| <i>circKDM8</i> | miR-6895-3p               | 1  |
| <i>circKDM8</i> | miR-6895-5p               | 6  |
| <i>circKDM8</i> | miR-708-3p                | 3  |
| <i>circKDM8</i> | miR-7106-3p               | 7  |
| <i>circKDM8</i> | miR-7106-5p               | 1  |
| <i>circKDM8</i> | miR-7108-5p               | 5  |
| <i>circKDM8</i> | miR-7109-3p               | 2  |
| <i>circKDM8</i> | miR-7109-5p               | 3  |
| <i>circKDM8</i> | miR-7110-3p               | 2  |
| <i>circKDM8</i> | miR-7113-3p               | 10 |
| <i>circKDM8</i> | miR-7113-5p               | 1  |
| <i>circKDM8</i> | miR-7114-5p               | 1  |
| <i>circKDM8</i> | miR-7150                  | 2  |
| <i>circKDM8</i> | miR-7152-5p               | 2  |
| <i>circKDM8</i> | miR-7153-3p               | 4  |
| <i>circKDM8</i> | miR-7154-3p               | 1  |
| <i>circKDM8</i> | miR-7154-5p               | 6  |
| <i>circKDM8</i> | miR-7155-5p               | 3  |
| <i>circKDM8</i> | miR-7156-3p               | 8  |
| <i>circKDM8</i> | miR-7158-3p               | 5  |
| <i>circKDM8</i> | miR-7158-5p               | 6  |
| <i>circKDM8</i> | miR-7160-3p               | 6  |
| <i>circKDM8</i> | miR-7160-5p               | 1  |
| <i>circKDM8</i> | miR-7162-3p               | 1  |
| <i>circKDM8</i> | miR-744-3p                | 1  |
| <i>circKDM8</i> | miR-759                   | 2  |
| <i>circKDM8</i> | miR-762/4492/4498/5001-5p | 7  |
| <i>circKDM8</i> | miR-764                   | 1  |
| <i>circKDM8</i> | miR-7641                  | 2  |

|                 |              |    |
|-----------------|--------------|----|
| <i>circKDM8</i> | miR-765      | 1  |
| <i>circKDM8</i> | miR-766-3p   | 1  |
| <i>circKDM8</i> | miR-766-5p   | 1  |
| <i>circKDM8</i> | miR-767-3p   | 13 |
| <i>circKDM8</i> | miR-767-5p   | 1  |
| <i>circKDM8</i> | miR-769-5p   | 1  |
| <i>circKDM8</i> | miR-770-5p   | 1  |
| <i>circKDM8</i> | miR-7843-3p  | 3  |
| <i>circKDM8</i> | miR-7844-5p  | 3  |
| <i>circKDM8</i> | miR-7845-5p  | 4  |
| <i>circKDM8</i> | miR-7846-3p  | 1  |
| <i>circKDM8</i> | miR-7850-5p  | 1  |
| <i>circKDM8</i> | miR-7854-3p  | 5  |
| <i>circKDM8</i> | miR-7856-5p  | 2  |
| <i>circKDM8</i> | miR-7974     | 6  |
| <i>circKDM8</i> | miR-7975     | 1  |
| <i>circKDM8</i> | miR-7976     | 2  |
| <i>circKDM8</i> | miR-802      | 1  |
| <i>circKDM8</i> | miR-8055     | 1  |
| <i>circKDM8</i> | miR-8057     | 5  |
| <i>circKDM8</i> | miR-8063     | 1  |
| <i>circKDM8</i> | miR-8065     | 2  |
| <i>circKDM8</i> | miR-8068     | 2  |
| <i>circKDM8</i> | miR-8069     | 2  |
| <i>circKDM8</i> | miR-8075     | 5  |
| <i>circKDM8</i> | miR-8077     | 1  |
| <i>circKDM8</i> | miR-8078     | 1  |
| <i>circKDM8</i> | miR-8080     | 6  |
| <i>circKDM8</i> | miR-8083     | 7  |
| <i>circKDM8</i> | miR-8086     | 2  |
| <i>circKDM8</i> | miR-8485     | 3  |
| <i>circKDM8</i> | miR-873-3p   | 2  |
| <i>circKDM8</i> | miR-873-5p.1 | 4  |
| <i>circKDM8</i> | miR-874-3p   | 1  |
| <i>circKDM8</i> | miR-875-3p   | 1  |
| <i>circKDM8</i> | miR-875-5p   | 4  |
| <i>circKDM8</i> | miR-876-3p   | 1  |
| <i>circKDM8</i> | miR-885-3p   | 4  |

|                   |                              |   |
|-------------------|------------------------------|---|
| <i>circKDM8</i>   | miR-889-3p                   | 4 |
| <i>circKDM8</i>   | miR-891a-3p                  | 2 |
| <i>circKDM8</i>   | miR-892-5p                   | 2 |
| <i>circKDM8</i>   | miR-892b                     | 2 |
| <i>circKDM8</i>   | miR-9-5p                     | 1 |
| <i>circKDM8</i>   | miR-920/4300/5591-5p/6726-5p | 1 |
| <i>circKDM8</i>   | miR-921                      | 1 |
| <i>circKDM8</i>   | miR-92a-1-5p                 | 4 |
| <i>circKDM8</i>   | miR-92a-2-5p                 | 6 |
| <i>circKDM8</i>   | miR-92b-5p                   | 2 |
| <i>circKDM8</i>   | miR-93-3p                    | 4 |
| <i>circKDM8</i>   | miR-937-3p                   | 1 |
| <i>circKDM8</i>   | miR-938                      | 2 |
| <i>circKDM8</i>   | miR-939-3p                   | 5 |
| <i>circKDM8</i>   | miR-940/6808-5p/6893-5p      | 1 |
| <i>circKDM8</i>   | miR-942-5p                   | 2 |
| <i>circKDM8</i>   | miR-95-5p                    | 1 |
| <i>circKDM8</i>   | miR-96-3p                    | 1 |
| <i>circKDM8</i>   | miR-96-5p/1271-5p            | 5 |
| <i>circKLHDC1</i> | let-7a-2-3p/let-7g-3p        | 1 |
| <i>circKLHDC1</i> | let-7c-3p                    | 1 |
| <i>circKLHDC1</i> | miR-101-3p.2                 | 2 |
| <i>circKLHDC1</i> | miR-105-5p                   | 2 |
| <i>circKLHDC1</i> | miR-1200                     | 1 |
| <i>circKLHDC1</i> | miR-1208                     | 1 |
| <i>circKLHDC1</i> | miR-1236-3p                  | 2 |
| <i>circKLHDC1</i> | miR-126-5p                   | 4 |
| <i>circKLHDC1</i> | miR-1264                     | 2 |
| <i>circKLHDC1</i> | miR-1273d                    | 1 |
| <i>circKLHDC1</i> | miR-1273g-5p                 | 2 |
| <i>circKLHDC1</i> | miR-1276                     | 1 |
| <i>circKLHDC1</i> | miR-1277-5p                  | 2 |
| <i>circKLHDC1</i> | miR-1279                     | 1 |
| <i>circKLHDC1</i> | miR-1285-5p                  | 1 |
| <i>circKLHDC1</i> | miR-1286                     | 2 |
| <i>circKLHDC1</i> | miR-1295b-5p/1912            | 2 |
| <i>circKLHDC1</i> | miR-132-3p/212-3p            | 1 |
| <i>circKLHDC1</i> | miR-1323                     | 1 |

|                   |                     |   |
|-------------------|---------------------|---|
| <i>circKLHDC1</i> | miR-135b-3p         | 4 |
| <i>circKLHDC1</i> | miR-140-3p.1        | 1 |
| <i>circKLHDC1</i> | miR-140-3p.2        | 2 |
| <i>circKLHDC1</i> | miR-140-5p          | 2 |
| <i>circKLHDC1</i> | miR-141-5p          | 2 |
| <i>circKLHDC1</i> | miR-142-5p          | 3 |
| <i>circKLHDC1</i> | miR-145-3p          | 1 |
| <i>circKLHDC1</i> | miR-148b-5p/6874-3p | 1 |
| <i>circKLHDC1</i> | miR-150-5p          | 4 |
| <i>circKLHDC1</i> | miR-1537-5p         | 1 |
| <i>circKLHDC1</i> | miR-154-3p/487-3p   | 2 |
| <i>circKLHDC1</i> | miR-155-3p          | 1 |
| <i>circKLHDC1</i> | miR-155-5p          | 1 |
| <i>circKLHDC1</i> | miR-16-2-3p/195-3p  | 1 |
| <i>circKLHDC1</i> | miR-181-3p/4420     | 1 |
| <i>circKLHDC1</i> | miR-190a-3p         | 2 |
| <i>circKLHDC1</i> | miR-202-5p          | 1 |
| <i>circKLHDC1</i> | miR-203a-3p.1       | 1 |
| <i>circKLHDC1</i> | miR-203a-5p         | 2 |
| <i>circKLHDC1</i> | miR-204-3p/4646-5p  | 1 |
| <i>circKLHDC1</i> | miR-205-3p          | 3 |
| <i>circKLHDC1</i> | miR-205-5p          | 2 |
| <i>circKLHDC1</i> | miR-208-5p          | 2 |
| <i>circKLHDC1</i> | miR-2113            | 2 |
| <i>circKLHDC1</i> | miR-2115-5p         | 1 |
| <i>circKLHDC1</i> | miR-2116-3p         | 4 |
| <i>circKLHDC1</i> | miR-2117            | 1 |
| <i>circKLHDC1</i> | miR-214-3p/3619-5p  | 2 |
| <i>circKLHDC1</i> | miR-23-3p           | 1 |
| <i>circKLHDC1</i> | miR-2355-5p         | 2 |
| <i>circKLHDC1</i> | miR-2467-5p         | 1 |
| <i>circKLHDC1</i> | miR-2681-3p         | 1 |
| <i>circKLHDC1</i> | miR-2681-5p         | 1 |
| <i>circKLHDC1</i> | miR-29-3p           | 1 |
| <i>circKLHDC1</i> | miR-299-3p          | 2 |
| <i>circKLHDC1</i> | miR-29a-5p          | 2 |
| <i>circKLHDC1</i> | miR-302b-5p/302d-5p | 2 |
| <i>circKLHDC1</i> | miR-302c-5p         | 1 |



|                   |                                              |   |
|-------------------|----------------------------------------------|---|
| <i>circKLHDC1</i> | miR-3074-3p                                  | 1 |
| <i>circKLHDC1</i> | miR-3074-5p                                  | 1 |
| <i>circKLHDC1</i> | miR-30b-3p/1273h-5p/3689-3p/6779-5p/6780a-5p |   |
| <i>circKLHDC1</i> | miR-30c-3p/6788-5p                           | 1 |
| <i>circKLHDC1</i> | miR-3120-5p                                  | 2 |
| <i>circKLHDC1</i> | miR-3121-5p                                  | 1 |
| <i>circKLHDC1</i> | miR-3123                                     | 1 |
| <i>circKLHDC1</i> | miR-3124-3p                                  | 1 |
| <i>circKLHDC1</i> | miR-3130-5p/4482-5p                          | 2 |
| <i>circKLHDC1</i> | miR-3138                                     | 2 |
| <i>circKLHDC1</i> | miR-3144-3p                                  | 2 |
| <i>circKLHDC1</i> | miR-3157-3p                                  | 2 |
| <i>circKLHDC1</i> | miR-3160-5p                                  | 2 |
| <i>circKLHDC1</i> | miR-3168                                     | 1 |
| <i>circKLHDC1</i> | miR-3184-3p                                  | 2 |
| <i>circKLHDC1</i> | miR-3188                                     | 1 |
| <i>circKLHDC1</i> | miR-3192-5p                                  | 1 |
| <i>circKLHDC1</i> | miR-3198/4309                                | 1 |
| <i>circKLHDC1</i> | miR-320                                      | 2 |
| <i>circKLHDC1</i> | miR-323-3p                                   | 2 |
| <i>circKLHDC1</i> | miR-323a-5p                                  | 2 |
| <i>circKLHDC1</i> | miR-33-5p                                    | 1 |
| <i>circKLHDC1</i> | miR-330-3p                                   | 1 |
| <i>circKLHDC1</i> | miR-338-3p                                   | 2 |
| <i>circKLHDC1</i> | miR-33a-3p                                   | 1 |
| <i>circKLHDC1</i> | miR-3612                                     | 1 |
| <i>circKLHDC1</i> | miR-3613-3p                                  | 1 |
| <i>circKLHDC1</i> | miR-362-5p/500b-5p                           | 2 |
| <i>circKLHDC1</i> | miR-3652/4430                                | 1 |
| <i>circKLHDC1</i> | miR-3660/4526                                | 1 |
| <i>circKLHDC1</i> | miR-3662                                     | 1 |
| <i>circKLHDC1</i> | miR-3664-5p                                  | 1 |
| <i>circKLHDC1</i> | miR-3667-3p                                  | 2 |
| <i>circKLHDC1</i> | miR-3668                                     | 2 |
| <i>circKLHDC1</i> | miR-3671                                     | 2 |
| <i>circKLHDC1</i> | miR-3675-3p                                  | 1 |
| <i>circKLHDC1</i> | miR-3682-5p                                  | 1 |
| <i>circKLHDC1</i> | miR-3685                                     | 1 |

|                   |                           |   |
|-------------------|---------------------------|---|
| <i>circKLHDC1</i> | miR-3691-3p               | 3 |
| <i>circKLHDC1</i> | miR-371-5p                | 1 |
| <i>circKLHDC1</i> | miR-3713                  | 2 |
| <i>circKLHDC1</i> | miR-371b-5p/373-5p/616-5p | 1 |
| <i>circKLHDC1</i> | miR-372-5p                | 1 |
| <i>circKLHDC1</i> | miR-374a-3p               | 4 |
| <i>circKLHDC1</i> | miR-376-3p                | 1 |
| <i>circKLHDC1</i> | miR-378a-5p               | 1 |
| <i>circKLHDC1</i> | miR-380-3p                | 2 |
| <i>circKLHDC1</i> | miR-380-5p/563            | 2 |
| <i>circKLHDC1</i> | miR-382-3p                | 5 |
| <i>circKLHDC1</i> | miR-384                   | 1 |
| <i>circKLHDC1</i> | miR-3913-3p               | 2 |
| <i>circKLHDC1</i> | miR-3925-5p               | 1 |
| <i>circKLHDC1</i> | miR-3929/4419b/4478       | 4 |
| <i>circKLHDC1</i> | miR-3973                  | 2 |
| <i>circKLHDC1</i> | miR-3975                  | 1 |
| <i>circKLHDC1</i> | miR-4279                  | 2 |
| <i>circKLHDC1</i> | miR-4301                  | 1 |
| <i>circKLHDC1</i> | miR-4307                  | 2 |
| <i>circKLHDC1</i> | miR-431-5p                | 2 |
| <i>circKLHDC1</i> | miR-4311                  | 1 |
| <i>circKLHDC1</i> | miR-4318                  | 1 |
| <i>circKLHDC1</i> | miR-432-5p                | 1 |
| <i>circKLHDC1</i> | miR-4328                  | 1 |
| <i>circKLHDC1</i> | miR-433-3p                | 1 |
| <i>circKLHDC1</i> | miR-4423-3p               | 1 |
| <i>circKLHDC1</i> | miR-4423-5p               | 2 |
| <i>circKLHDC1</i> | miR-4426/4647/4662b       | 1 |
| <i>circKLHDC1</i> | miR-4443                  | 1 |
| <i>circKLHDC1</i> | miR-4464/4748             | 3 |
| <i>circKLHDC1</i> | miR-4470                  | 1 |
| <i>circKLHDC1</i> | miR-4474-5p               | 1 |
| <i>circKLHDC1</i> | miR-4491/4657             | 2 |
| <i>circKLHDC1</i> | miR-4496                  | 3 |
| <i>circKLHDC1</i> | miR-4505/5787             | 1 |
| <i>circKLHDC1</i> | miR-4517                  | 2 |
| <i>circKLHDC1</i> | miR-452-3p                | 4 |

|                   |                       |   |
|-------------------|-----------------------|---|
| <i>circKLHDC1</i> | miR-4520-3p           | 2 |
| <i>circKLHDC1</i> | miR-4528              | 6 |
| <i>circKLHDC1</i> | miR-4530              | 2 |
| <i>circKLHDC1</i> | miR-4633-5p           | 3 |
| <i>circKLHDC1</i> | miR-4653-3p           | 2 |
| <i>circKLHDC1</i> | miR-4659a-5p/4659b-5p | 5 |
| <i>circKLHDC1</i> | miR-4686              | 3 |
| <i>circKLHDC1</i> | miR-4690-5p           | 2 |
| <i>circKLHDC1</i> | miR-4691-5p/6792-3p   | 1 |
| <i>circKLHDC1</i> | miR-4698              | 2 |
| <i>circKLHDC1</i> | miR-4699-3p           | 1 |
| <i>circKLHDC1</i> | miR-4711-3p           | 4 |
| <i>circKLHDC1</i> | miR-4711-5p           | 1 |
| <i>circKLHDC1</i> | miR-4713-5p           | 2 |
| <i>circKLHDC1</i> | miR-4714-5p           | 1 |
| <i>circKLHDC1</i> | miR-4718              | 1 |
| <i>circKLHDC1</i> | miR-4722-5p           | 2 |
| <i>circKLHDC1</i> | miR-4731-5p           | 1 |
| <i>circKLHDC1</i> | miR-4742-3p           | 2 |
| <i>circKLHDC1</i> | miR-4752              | 2 |
| <i>circKLHDC1</i> | miR-4753-3p           | 1 |
| <i>circKLHDC1</i> | miR-4775              | 3 |
| <i>circKLHDC1</i> | miR-4795-3p           | 2 |
| <i>circKLHDC1</i> | miR-4800-5p           | 2 |
| <i>circKLHDC1</i> | miR-4802-3p           | 1 |
| <i>circKLHDC1</i> | miR-4802-5p           | 1 |
| <i>circKLHDC1</i> | miR-485-5p            | 1 |
| <i>circKLHDC1</i> | miR-489-3p            | 2 |
| <i>circKLHDC1</i> | miR-490-5p            | 1 |
| <i>circKLHDC1</i> | miR-491-3p            | 2 |
| <i>circKLHDC1</i> | miR-493-5p            | 1 |
| <i>circKLHDC1</i> | miR-495-3p            | 1 |
| <i>circKLHDC1</i> | miR-4999-5p           | 1 |
| <i>circKLHDC1</i> | miR-499a-3p/499b-3p   | 3 |
| <i>circKLHDC1</i> | miR-5000-5p           | 1 |
| <i>circKLHDC1</i> | miR-5003-5p           | 1 |
| <i>circKLHDC1</i> | miR-5007-3p           | 1 |
| <i>circKLHDC1</i> | miR-5009-3p           | 1 |

|                   |                             |   |
|-------------------|-----------------------------|---|
| <i>circKLHDC1</i> | miR-500b-3p                 | 1 |
| <i>circKLHDC1</i> | miR-501-5p                  | 2 |
| <i>circKLHDC1</i> | miR-5010-3p                 | 2 |
| <i>circKLHDC1</i> | miR-5011-5p                 | 1 |
| <i>circKLHDC1</i> | miR-5088-3p                 | 2 |
| <i>circKLHDC1</i> | miR-510-3p                  | 3 |
| <i>circKLHDC1</i> | miR-511-5p                  | 4 |
| <i>circKLHDC1</i> | miR-513a-3p/513c-3p/3606-3p | 1 |
| <i>circKLHDC1</i> | miR-513c-5p/514b-5p         | 1 |
| <i>circKLHDC1</i> | miR-514a-5p                 | 1 |
| <i>circKLHDC1</i> | miR-515-5p/519e-5p          | 2 |
| <i>circKLHDC1</i> | miR-516a-3p/516b-3p/7162-5p | 1 |
| <i>circKLHDC1</i> | miR-519d-5p                 | 2 |
| <i>circKLHDC1</i> | miR-520g-3p                 | 2 |
| <i>circKLHDC1</i> | miR-532-3p                  | 4 |
| <i>circKLHDC1</i> | miR-539-5p                  | 1 |
| <i>circKLHDC1</i> | miR-548at-5p                | 3 |
| <i>circKLHDC1</i> | miR-548c-3p                 | 1 |
| <i>circKLHDC1</i> | miR-548g-3p                 | 1 |
| <i>circKLHDC1</i> | miR-556-3p                  | 1 |
| <i>circKLHDC1</i> | miR-5580-3p                 | 1 |
| <i>circKLHDC1</i> | miR-5581-3p                 | 1 |
| <i>circKLHDC1</i> | miR-5583-3p                 | 2 |
| <i>circKLHDC1</i> | miR-5584-3p                 | 1 |
| <i>circKLHDC1</i> | miR-5589-5p                 | 1 |
| <i>circKLHDC1</i> | miR-5590-5p                 | 5 |
| <i>circKLHDC1</i> | miR-5591-3p                 | 2 |
| <i>circKLHDC1</i> | miR-561-3p                  | 3 |
| <i>circKLHDC1</i> | miR-5680                    | 1 |
| <i>circKLHDC1</i> | miR-5691                    | 2 |
| <i>circKLHDC1</i> | miR-5692a                   | 1 |
| <i>circKLHDC1</i> | miR-5695                    | 2 |
| <i>circKLHDC1</i> | miR-5700                    | 1 |
| <i>circKLHDC1</i> | miR-582-5p                  | 2 |
| <i>circKLHDC1</i> | miR-583                     | 1 |
| <i>circKLHDC1</i> | miR-586                     | 1 |
| <i>circKLHDC1</i> | miR-587                     | 2 |
| <i>circKLHDC1</i> | miR-590-3p                  | 1 |

|                   |                     |   |
|-------------------|---------------------|---|
| <i>circKLHDC1</i> | miR-592             | 2 |
| <i>circKLHDC1</i> | miR-597-5p          | 2 |
| <i>circKLHDC1</i> | miR-598-5p          | 2 |
| <i>circKLHDC1</i> | miR-599             | 2 |
| <i>circKLHDC1</i> | miR-607             | 2 |
| <i>circKLHDC1</i> | miR-6071            | 2 |
| <i>circKLHDC1</i> | miR-6083            | 2 |
| <i>circKLHDC1</i> | miR-6134            | 1 |
| <i>circKLHDC1</i> | miR-6165            | 2 |
| <i>circKLHDC1</i> | miR-619-5p/6506-5p  | 1 |
| <i>circKLHDC1</i> | miR-622             | 1 |
| <i>circKLHDC1</i> | miR-629-3p          | 5 |
| <i>circKLHDC1</i> | miR-6501-5p         | 2 |
| <i>circKLHDC1</i> | miR-6504-3p         | 2 |
| <i>circKLHDC1</i> | miR-6507-3p         | 2 |
| <i>circKLHDC1</i> | miR-6510-5p         | 2 |
| <i>circKLHDC1</i> | miR-6514-5p         | 1 |
| <i>circKLHDC1</i> | miR-6515-3p         | 2 |
| <i>circKLHDC1</i> | miR-6515-5p         | 1 |
| <i>circKLHDC1</i> | miR-652-5p          | 1 |
| <i>circKLHDC1</i> | miR-653-3p          | 1 |
| <i>circKLHDC1</i> | miR-653-5p          | 2 |
| <i>circKLHDC1</i> | miR-656-3p          | 2 |
| <i>circKLHDC1</i> | miR-656-5p          | 2 |
| <i>circKLHDC1</i> | miR-660-5p          | 1 |
| <i>circKLHDC1</i> | miR-6719-3p         | 1 |
| <i>circKLHDC1</i> | miR-6729-3p         | 2 |
| <i>circKLHDC1</i> | miR-6730-3p         | 1 |
| <i>circKLHDC1</i> | miR-6734-3p         | 2 |
| <i>circKLHDC1</i> | miR-6739-3p         | 1 |
| <i>circKLHDC1</i> | miR-6749-3p         | 1 |
| <i>circKLHDC1</i> | miR-6760-3p         | 1 |
| <i>circKLHDC1</i> | miR-6767-3p         | 2 |
| <i>circKLHDC1</i> | miR-6776-3p         | 1 |
| <i>circKLHDC1</i> | miR-6800-5p         | 3 |
| <i>circKLHDC1</i> | miR-6802-5p         | 3 |
| <i>circKLHDC1</i> | miR-6814-5p         | 1 |
| <i>circKLHDC1</i> | miR-6815-5p/6865-5p | 2 |

|                   |              |   |
|-------------------|--------------|---|
| <i>circKLHDC1</i> | miR-6818-3p  | 1 |
| <i>circKLHDC1</i> | miR-6828-3p  | 2 |
| <i>circKLHDC1</i> | miR-6830-3p  | 4 |
| <i>circKLHDC1</i> | miR-6833-5p  | 2 |
| <i>circKLHDC1</i> | miR-6844     | 4 |
| <i>circKLHDC1</i> | miR-6867-3p  | 2 |
| <i>circKLHDC1</i> | miR-6868-3p  | 2 |
| <i>circKLHDC1</i> | miR-6871-3p  | 1 |
| <i>circKLHDC1</i> | miR-6886-3p  | 2 |
| <i>circKLHDC1</i> | miR-6888-3p  | 2 |
| <i>circKLHDC1</i> | miR-7112-3p  | 1 |
| <i>circKLHDC1</i> | miR-7152-5p  | 1 |
| <i>circKLHDC1</i> | miR-7154-5p  | 1 |
| <i>circKLHDC1</i> | miR-758-5p   | 2 |
| <i>circKLHDC1</i> | miR-767-3p   | 2 |
| <i>circKLHDC1</i> | miR-767-5p   | 1 |
| <i>circKLHDC1</i> | miR-770-5p   | 1 |
| <i>circKLHDC1</i> | miR-7852-3p  | 2 |
| <i>circKLHDC1</i> | miR-7854-3p  | 1 |
| <i>circKLHDC1</i> | miR-8060     | 1 |
| <i>circKLHDC1</i> | miR-8063     | 2 |
| <i>circKLHDC1</i> | miR-873-5p.1 | 2 |
| <i>circKLHDC1</i> | miR-873-5p.2 | 2 |
| <i>circKLHDC1</i> | miR-874-3p   | 2 |
| <i>circKLHDC1</i> | miR-876-3p   | 2 |
| <i>circKLHDC1</i> | miR-885-5p   | 4 |
| <i>circKLHDC1</i> | miR-892a     | 1 |
| <i>circKLHDC1</i> | miR-922      | 2 |
| <i>circKLHDC1</i> | miR-938      | 2 |
| <i>circKLHDC1</i> | miR-942-3p   | 2 |
| <i>circKLHDC1</i> | miR-96-3p    | 1 |
| <i>circKLHDC1</i> | miR-10-5p    | 1 |
| <i>circKLHDC1</i> | miR-1204     | 2 |
| <i>circKLHDC1</i> | miR-1224-3p  | 2 |
| <i>circKLHDC1</i> | miR-1227-3p  | 2 |
| <i>circKLHDC1</i> | miR-124-3p.1 | 2 |
| <i>circKLHDC1</i> | miR-1250-3p  | 2 |
| <i>circKLHDC1</i> | miR-125a-3p  | 1 |

|                   |                                     |   |
|-------------------|-------------------------------------|---|
| <i>circKLHDC1</i> | miR-1260a/1260b                     | 2 |
| <i>circKLHDC1</i> | miR-1273h-3p                        | 1 |
| <i>circKLHDC1</i> | miR-1298-5p                         | 1 |
| <i>circKLHDC1</i> | miR-130-3p/301-3p/454-3p            | 1 |
| <i>circKLHDC1</i> | miR-1306-5p                         | 1 |
| <i>circKLHDC1</i> | miR-136-5p                          | 1 |
| <i>circKLHDC1</i> | miR-147a                            | 2 |
| <i>circKLHDC1</i> | miR-153-5p                          | 2 |
| <i>circKLHDC1</i> | miR-1587/3620-5p                    | 1 |
| <i>circKLHDC1</i> | miR-17-5p/20-5p/93-5p/106-5p/519-3p | 1 |
| <i>circKLHDC1</i> | miR-188-3p                          | 2 |
| <i>circKLHDC1</i> | miR-19-3p                           | 1 |
| <i>circKLHDC1</i> | miR-19-5p                           | 1 |
| <i>circKLHDC1</i> | miR-198                             | 1 |
| <i>circKLHDC1</i> | miR-2052                            | 1 |
| <i>circKLHDC1</i> | miR-2053                            | 1 |
| <i>circKLHDC1</i> | miR-216b-3p                         | 2 |
| <i>circKLHDC1</i> | miR-217                             | 2 |
| <i>circKLHDC1</i> | miR-224-5p                          | 2 |
| <i>circKLHDC1</i> | miR-2277-5p                         | 2 |
| <i>circKLHDC1</i> | miR-27a-5p                          | 1 |
| <i>circKLHDC1</i> | miR-297                             | 2 |
| <i>circKLHDC1</i> | miR-298                             | 1 |
| <i>circKLHDC1</i> | miR-299-5p                          | 1 |
| <i>circKLHDC1</i> | miR-29c-5p                          | 1 |
| <i>circKLHDC1</i> | miR-3064-5p                         | 5 |
| <i>circKLHDC1</i> | miR-3065-5p                         | 1 |
| <i>circKLHDC1</i> | miR-31-5p                           | 2 |
| <i>circKLHDC1</i> | miR-3119                            | 1 |
| <i>circKLHDC1</i> | miR-3130-3p                         | 3 |
| <i>circKLHDC1</i> | miR-3145-3p                         | 1 |
| <i>circKLHDC1</i> | miR-3145-5p                         | 3 |
| <i>circKLHDC1</i> | miR-3148                            | 1 |
| <i>circKLHDC1</i> | miR-3152-3p                         | 1 |
| <i>circKLHDC1</i> | miR-3156-3p                         | 2 |
| <i>circKLHDC1</i> | miR-3165                            | 2 |
| <i>circKLHDC1</i> | miR-3180-5p                         | 1 |
| <i>circKLHDC1</i> | miR-3190-3p                         | 2 |

|                   |                    |   |
|-------------------|--------------------|---|
| <i>circKLHDC1</i> | miR-32-3p          | 1 |
| <i>circKLHDC1</i> | miR-3201/4791      | 1 |
| <i>circKLHDC1</i> | miR-331-5p         | 1 |
| <i>circKLHDC1</i> | miR-339-5p         | 1 |
| <i>circKLHDC1</i> | miR-34a-3p         | 1 |
| <i>circKLHDC1</i> | miR-34b-3p         | 1 |
| <i>circKLHDC1</i> | miR-34c-3p         | 1 |
| <i>circKLHDC1</i> | miR-3617-3p        | 1 |
| <i>circKLHDC1</i> | miR-3677-3p        | 2 |
| <i>circKLHDC1</i> | miR-3678-3p        | 1 |
| <i>circKLHDC1</i> | miR-3680-3p        | 1 |
| <i>circKLHDC1</i> | miR-3714           | 2 |
| <i>circKLHDC1</i> | miR-375            | 1 |
| <i>circKLHDC1</i> | miR-376c-3p        | 1 |
| <i>circKLHDC1</i> | miR-382-5p         | 1 |
| <i>circKLHDC1</i> | miR-3910           | 2 |
| <i>circKLHDC1</i> | miR-3922-5p        | 2 |
| <i>circKLHDC1</i> | miR-3934-5p        | 1 |
| <i>circKLHDC1</i> | miR-410-3p         | 2 |
| <i>circKLHDC1</i> | miR-4280           | 1 |
| <i>circKLHDC1</i> | miR-4325           | 1 |
| <i>circKLHDC1</i> | miR-4421/5699-3p   | 1 |
| <i>circKLHDC1</i> | miR-4438           | 2 |
| <i>circKLHDC1</i> | miR-4446-5p        | 2 |
| <i>circKLHDC1</i> | miR-4473           | 1 |
| <i>circKLHDC1</i> | miR-4479           | 2 |
| <i>circKLHDC1</i> | miR-4504           | 1 |
| <i>circKLHDC1</i> | miR-4506           | 1 |
| <i>circKLHDC1</i> | miR-450b-3p/769-3p | 1 |
| <i>circKLHDC1</i> | miR-450b-5p        | 1 |
| <i>circKLHDC1</i> | miR-4511           | 2 |
| <i>circKLHDC1</i> | miR-4540           | 1 |
| <i>circKLHDC1</i> | miR-466            | 2 |
| <i>circKLHDC1</i> | miR-4662a-3p       | 2 |
| <i>circKLHDC1</i> | miR-4671-3p        | 1 |
| <i>circKLHDC1</i> | miR-4674           | 1 |
| <i>circKLHDC1</i> | miR-4680-5p        | 2 |
| <i>circKLHDC1</i> | miR-4687-3p        | 5 |



|                   |                                                                    |   |
|-------------------|--------------------------------------------------------------------|---|
| <i>circKLHDC1</i> | miR-4694-5p                                                        | 1 |
| <i>circKLHDC1</i> | miR-4717-3p                                                        | 2 |
| <i>circKLHDC1</i> | miR-4760-5p/8061                                                   | 1 |
| <i>circKLHDC1</i> | miR-4762-5p                                                        | 1 |
| <i>circKLHDC1</i> | miR-4773                                                           | 1 |
| <i>circKLHDC1</i> | miR-4787-3p                                                        | 2 |
| <i>circKLHDC1</i> | miR-4793-3p                                                        | 3 |
| <i>circKLHDC1</i> | miR-4793-5p                                                        | 1 |
| <i>circKLHDC1</i> | miR-484/3155                                                       | 2 |
| <i>circKLHDC1</i> | miR-495-5p                                                         | 1 |
| <i>circKLHDC1</i> | miR-500a-5p                                                        | 1 |
| <i>circKLHDC1</i> | miR-504-5p.1                                                       | 1 |
| <i>circKLHDC1</i> | miR-507/557                                                        | 1 |
| <i>circKLHDC1</i> | miR-508-5p                                                         | 3 |
| <i>circKLHDC1</i> | miR-5089-5p                                                        | 1 |
| <i>circKLHDC1</i> | miR-509-3-5p/509-5p/4418                                           | 2 |
| <i>circKLHDC1</i> | miR-511-3p                                                         | 1 |
| <i>circKLHDC1</i> | miR-518a-5p/527                                                    | 1 |
| <i>circKLHDC1</i> | miR-5196-3p                                                        | 1 |
| <i>circKLHDC1</i> | miR-525-5p                                                         | 1 |
| <i>circKLHDC1</i> | miR-542-3p                                                         | 1 |
| <i>circKLHDC1</i> | miR-548ah-5p/3609                                                  | 1 |
| <i>circKLHDC1</i> | miR-548av-5p/548k/8054                                             | 1 |
| <i>circKLHDC1</i> | miR-548aw                                                          | 1 |
| <i>circKLHDC1</i> | miR-548ay-5p/548au-5p/548as-5p/548ar-5p/548aq-5p/548ap-5p/548am-5p | 1 |
| <i>circKLHDC1</i> | miR-548az-5p/548t-5p                                               | 1 |
| <i>circKLHDC1</i> | miR-548b-3p                                                        | 2 |
| <i>circKLHDC1</i> | miR-548l                                                           | 1 |
| <i>circKLHDC1</i> | miR-548n                                                           | 1 |
| <i>circKLHDC1</i> | miR-550b-2-5p                                                      | 2 |
| <i>circKLHDC1</i> | miR-551b-5p                                                        | 2 |
| <i>circKLHDC1</i> | miR-5571-3p                                                        | 1 |
| <i>circKLHDC1</i> | miR-5589-3p                                                        | 2 |
| <i>circKLHDC1</i> | miR-5690                                                           | 1 |
| <i>circKLHDC1</i> | miR-5696                                                           | 2 |
| <i>circKLHDC1</i> | miR-5697                                                           | 2 |
| <i>circKLHDC1</i> | miR-579-3p                                                         | 2 |
| <i>circKLHDC1</i> | miR-589-3p                                                         | 1 |

|                   |             |   |
|-------------------|-------------|---|
| <i>circKLHDC1</i> | miR-595     | 1 |
| <i>circKLHDC1</i> | miR-6084    | 2 |
| <i>circKLHDC1</i> | miR-6124    | 1 |
| <i>circKLHDC1</i> | miR-627-3p  | 2 |
| <i>circKLHDC1</i> | miR-633     | 1 |
| <i>circKLHDC1</i> | miR-647     | 2 |
| <i>circKLHDC1</i> | miR-6502-3p | 1 |
| <i>circKLHDC1</i> | miR-6509-5p | 1 |
| <i>circKLHDC1</i> | miR-6512-5p | 2 |
| <i>circKLHDC1</i> | miR-6516-5p | 1 |
| <i>circKLHDC1</i> | miR-664a-3p | 1 |
| <i>circKLHDC1</i> | miR-6723-5p | 1 |
| <i>circKLHDC1</i> | miR-6728-5p | 1 |
| <i>circKLHDC1</i> | miR-6732-3p | 2 |
| <i>circKLHDC1</i> | miR-6741-3p | 2 |
| <i>circKLHDC1</i> | miR-6748-3p | 1 |
| <i>circKLHDC1</i> | miR-675-3p  | 2 |
| <i>circKLHDC1</i> | miR-6772-3p | 2 |
| <i>circKLHDC1</i> | miR-6782-3p | 1 |
| <i>circKLHDC1</i> | miR-6808-3p | 1 |
| <i>circKLHDC1</i> | miR-6809-5p | 2 |
| <i>circKLHDC1</i> | miR-6818-5p | 2 |
| <i>circKLHDC1</i> | miR-6842-3p | 2 |
| <i>circKLHDC1</i> | miR-6865-3p | 1 |
| <i>circKLHDC1</i> | miR-6871-5p | 1 |
| <i>circKLHDC1</i> | miR-6880-5p | 2 |
| <i>circKLHDC1</i> | miR-6884-3p | 1 |
| <i>circKLHDC1</i> | miR-6885-3p | 2 |
| <i>circKLHDC1</i> | miR-7106-3p | 2 |
| <i>circKLHDC1</i> | miR-7114-5p | 2 |
| <i>circKLHDC1</i> | miR-758-3p  | 1 |
| <i>circKLHDC1</i> | miR-7703    | 1 |
| <i>circKLHDC1</i> | miR-7849-3p | 1 |
| <i>circKLHDC1</i> | miR-7974    | 5 |
| <i>circKLHDC1</i> | miR-7975    | 1 |
| <i>circKLHDC1</i> | miR-8066    | 1 |
| <i>circKLHDC1</i> | miR-8071    | 2 |
| <i>circKLHDC1</i> | miR-8078    | 1 |

|                   |                       |   |
|-------------------|-----------------------|---|
| <i>circKLHDC1</i> | miR-124-3p.2/506-3p   | 1 |
| <i>circKLHDC1</i> | miR-1244              | 1 |
| <i>circKLHDC1</i> | miR-1257              | 1 |
| <i>circKLHDC1</i> | miR-142-3p.1          | 1 |
| <i>circKLHDC1</i> | miR-192-5p/215-5p     | 1 |
| <i>circKLHDC1</i> | miR-3156-5p           | 1 |
| <i>circKLHDC1</i> | miR-320e              | 1 |
| <i>circKLHDC1</i> | miR-3606-5p           | 1 |
| <i>circKLHDC1</i> | miR-383-5p.2          | 1 |
| <i>circKLHDC1</i> | miR-4663              | 1 |
| <i>circKLHDC1</i> | miR-4682              | 1 |
| <i>circKLHDC1</i> | miR-486-5p            | 1 |
| <i>circKLHDC1</i> | miR-488-3p            | 1 |
| <i>circKLHDC1</i> | miR-5190              | 1 |
| <i>circKLHDC1</i> | miR-5585-3p           | 1 |
| <i>circKLHDC1</i> | miR-5694              | 1 |
| <i>circKLHDC1</i> | miR-582-3p            | 1 |
| <i>circKLHDC1</i> | miR-6073              | 1 |
| <i>circKLHDC1</i> | miR-631/3661          | 1 |
| <i>circKLHDC1</i> | miR-6869-5p           | 1 |
| <i>circKLHDC1</i> | miR-7160-5p           | 1 |
| <i>circKLHDC1</i> | miR-7973              | 1 |
| <i>circKLHDC1</i> | miR-8077              | 1 |
| <i>circKLHDC1</i> | miR-9-3p              | 1 |
| <i>circKLHDC1</i> | miR-921               | 1 |
| <i>circKLHDC1</i> | miR-95-5p             | 1 |
| <i>circKLHDC1</i> | miR-5003-3p           | 1 |
| <i>circKLHDC1</i> | miR-125-5p            | 1 |
| <i>circKLHDC1</i> | miR-4324              | 1 |
| <i>circKLHDC1</i> | miR-4732-3p           | 1 |
| <i>circKLHDC1</i> | miR-544b              | 1 |
| <i>circKLHL8</i>  | let-7a-2-3p/let-7g-3p | 2 |
| <i>circKLHL8</i>  | let-7c-3p             | 2 |
| <i>circKLHL8</i>  | let-7d-3p             | 1 |
| <i>circKLHL8</i>  | let-7e-3p             | 1 |
| <i>circKLHL8</i>  | miR-1-3p/206          | 3 |
| <i>circKLHL8</i>  | miR-1-5p              | 3 |
| <i>circKLHL8</i>  | miR-100-3p            | 3 |

|                  |                     |   |
|------------------|---------------------|---|
| <i>circKLHL8</i> | miR-101-3p.1        | 2 |
| <i>circKLHL8</i> | miR-101-3p.2        | 3 |
| <i>circKLHL8</i> | miR-103-3p/107      | 6 |
| <i>circKLHL8</i> | miR-103a-2-5p       | 5 |
| <i>circKLHL8</i> | miR-103b            | 1 |
| <i>circKLHL8</i> | miR-105-5p          | 4 |
| <i>circKLHL8</i> | miR-106a-3p         | 2 |
| <i>circKLHL8</i> | miR-10a-3p          | 1 |
| <i>circKLHL8</i> | miR-10b-3p          | 1 |
| <i>circKLHL8</i> | miR-1183            | 1 |
| <i>circKLHL8</i> | miR-1184            | 5 |
| <i>circKLHL8</i> | miR-1193            | 1 |
| <i>circKLHL8</i> | miR-1197            | 2 |
| <i>circKLHL8</i> | miR-1199-3p         | 1 |
| <i>circKLHL8</i> | miR-1205            | 5 |
| <i>circKLHL8</i> | miR-1207-5p/4763-3p | 1 |
| <i>circKLHL8</i> | miR-122-5p          | 4 |
| <i>circKLHL8</i> | miR-1224-3p         | 1 |
| <i>circKLHL8</i> | miR-1224-5p         | 1 |
| <i>circKLHL8</i> | miR-1225-3p         | 1 |
| <i>circKLHL8</i> | miR-1226-3p         | 1 |
| <i>circKLHL8</i> | miR-1227-5p         | 2 |
| <i>circKLHL8</i> | miR-1229-3p         | 3 |
| <i>circKLHL8</i> | miR-1233-5p/6778-5p | 6 |
| <i>circKLHL8</i> | miR-1236-3p         | 1 |
| <i>circKLHL8</i> | miR-1237-3p         | 4 |
| <i>circKLHL8</i> | miR-1238-5p/4758-5p | 1 |
| <i>circKLHL8</i> | miR-124-3p.1        | 2 |
| <i>circKLHL8</i> | miR-124-5p          | 1 |
| <i>circKLHL8</i> | miR-1243            | 1 |
| <i>circKLHL8</i> | miR-1244            | 4 |
| <i>circKLHL8</i> | miR-1245a/8079      | 5 |
| <i>circKLHL8</i> | miR-1246            | 1 |
| <i>circKLHL8</i> | miR-1248            | 4 |
| <i>circKLHL8</i> | miR-1249-5p/6797-5p | 1 |
| <i>circKLHL8</i> | miR-1250-3p         | 4 |
| <i>circKLHL8</i> | miR-1251-5p         | 1 |
| <i>circKLHL8</i> | miR-1252-3p         | 5 |

|                  |                          |   |
|------------------|--------------------------|---|
| <i>circKLHL8</i> | miR-1252-5p              | 1 |
| <i>circKLHL8</i> | miR-1253                 | 2 |
| <i>circKLHL8</i> | miR-1254/3116            | 3 |
| <i>circKLHL8</i> | miR-1255a/1255b-5p       | 6 |
| <i>circKLHL8</i> | miR-1257                 | 2 |
| <i>circKLHL8</i> | miR-125a-3p              | 2 |
| <i>circKLHL8</i> | miR-1261                 | 4 |
| <i>circKLHL8</i> | miR-1262/4701-3p/6736-5p | 2 |
| <i>circKLHL8</i> | miR-1265                 | 1 |
| <i>circKLHL8</i> | miR-1266-3p              | 1 |
| <i>circKLHL8</i> | miR-1266-5p/4518         | 1 |
| <i>circKLHL8</i> | miR-1267                 | 2 |
| <i>circKLHL8</i> | miR-127-3p               | 2 |
| <i>circKLHL8</i> | miR-127-5p               | 4 |
| <i>circKLHL8</i> | miR-1270                 | 5 |
| <i>circKLHL8</i> | miR-1272                 | 5 |
| <i>circKLHL8</i> | miR-1273a                | 1 |
| <i>circKLHL8</i> | miR-1273c                | 2 |
| <i>circKLHL8</i> | miR-1273f                | 1 |
| <i>circKLHL8</i> | miR-1273g-5p             | 2 |
| <i>circKLHL8</i> | miR-1273h-3p             | 3 |
| <i>circKLHL8</i> | miR-1275/4665-5p         | 1 |
| <i>circKLHL8</i> | miR-1276                 | 2 |
| <i>circKLHL8</i> | miR-1277-3p              | 1 |
| <i>circKLHL8</i> | miR-128-1-5p             | 1 |
| <i>circKLHL8</i> | miR-128-3p               | 1 |
| <i>circKLHL8</i> | miR-1282                 | 2 |
| <i>circKLHL8</i> | miR-1284                 | 2 |
| <i>circKLHL8</i> | miR-1286                 | 3 |
| <i>circKLHL8</i> | miR-1287-3p              | 1 |
| <i>circKLHL8</i> | miR-1287-5p              | 1 |
| <i>circKLHL8</i> | miR-1288-5p              | 1 |
| <i>circKLHL8</i> | miR-129-5p               | 1 |
| <i>circKLHL8</i> | miR-1293/4483            | 1 |
| <i>circKLHL8</i> | miR-1294                 | 1 |
| <i>circKLHL8</i> | miR-1295b-5p/1912        | 1 |
| <i>circKLHL8</i> | miR-1296-3p              | 6 |
| <i>circKLHL8</i> | miR-1296-5p              | 1 |

|                  |                     |   |
|------------------|---------------------|---|
| <i>circKLHL8</i> | miR-1298-3p         | 4 |
| <i>circKLHL8</i> | miR-1298-5p         | 2 |
| <i>circKLHL8</i> | miR-1299            | 2 |
| <i>circKLHL8</i> | miR-1301-3p         | 2 |
| <i>circKLHL8</i> | miR-1301-5p/6502-5p | 2 |
| <i>circKLHL8</i> | miR-1303            | 2 |
| <i>circKLHL8</i> | miR-1304-3p         | 4 |
| <i>circKLHL8</i> | miR-1304-5p         | 1 |
| <i>circKLHL8</i> | miR-1306-5p         | 1 |
| <i>circKLHL8</i> | miR-130b-5p         | 2 |
| <i>circKLHL8</i> | miR-132-3p/212-3p   | 5 |
| <i>circKLHL8</i> | miR-132-5p          | 1 |
| <i>circKLHL8</i> | miR-1322            | 5 |
| <i>circKLHL8</i> | miR-133a-3p.1       | 1 |
| <i>circKLHL8</i> | miR-133a-3p.2/133b  | 1 |
| <i>circKLHL8</i> | miR-133a-5p         | 4 |
| <i>circKLHL8</i> | miR-134-3p          | 3 |
| <i>circKLHL8</i> | miR-1343-3p         | 2 |
| <i>circKLHL8</i> | miR-135-5p          | 6 |
| <i>circKLHL8</i> | miR-135b-3p         | 1 |
| <i>circKLHL8</i> | miR-136-5p          | 4 |
| <i>circKLHL8</i> | miR-137             | 1 |
| <i>circKLHL8</i> | miR-138-5p          | 4 |
| <i>circKLHL8</i> | miR-139-3p          | 1 |
| <i>circKLHL8</i> | miR-140-3p.1        | 1 |
| <i>circKLHL8</i> | miR-140-5p          | 2 |
| <i>circKLHL8</i> | miR-141-3p/200-3p   | 3 |
| <i>circKLHL8</i> | miR-141-5p          | 1 |
| <i>circKLHL8</i> | miR-142-3p.1        | 3 |
| <i>circKLHL8</i> | miR-142-3p.2        | 2 |
| <i>circKLHL8</i> | miR-142-5p          | 2 |
| <i>circKLHL8</i> | miR-143-3p          | 1 |
| <i>circKLHL8</i> | miR-143-5p          | 5 |
| <i>circKLHL8</i> | miR-144-3p          | 2 |
| <i>circKLHL8</i> | miR-145-3p          | 3 |
| <i>circKLHL8</i> | miR-145-5p          | 5 |
| <i>circKLHL8</i> | miR-146-5p          | 2 |
| <i>circKLHL8</i> | miR-1468-3p         | 4 |

|                  |                                      |   |
|------------------|--------------------------------------|---|
| <i>circKLHL8</i> | miR-146a-3p                          | 2 |
| <i>circKLHL8</i> | miR-146b-3p                          | 1 |
| <i>circKLHL8</i> | miR-1470                             | 2 |
| <i>circKLHL8</i> | miR-147a                             | 1 |
| <i>circKLHL8</i> | miR-148-3p/152-3p                    | 2 |
| <i>circKLHL8</i> | miR-148b-5p/6874-3p                  | 1 |
| <i>circKLHL8</i> | miR-15-5p/16-5p/195-5p/424-5p/497-5p | 2 |
| <i>circKLHL8</i> | miR-150-5p                           | 3 |
| <i>circKLHL8</i> | miR-151-3p                           | 2 |
| <i>circKLHL8</i> | miR-151-5p                           | 1 |
| <i>circKLHL8</i> | miR-152-5p                           | 2 |
| <i>circKLHL8</i> | miR-153-3p                           | 2 |
| <i>circKLHL8</i> | miR-155-5p                           | 2 |
| <i>circKLHL8</i> | miR-1587/3620-5p                     | 2 |
| <i>circKLHL8</i> | miR-15a-3p                           | 2 |
| <i>circKLHL8</i> | miR-15b-3p                           | 1 |
| <i>circKLHL8</i> | miR-16-1-3p                          | 3 |
| <i>circKLHL8</i> | miR-17-3p                            | 5 |
| <i>circKLHL8</i> | miR-17-5p/20-5p/93-5p/106-5p/519-3p  | 1 |
| <i>circKLHL8</i> | miR-181-3p/4420                      | 1 |
| <i>circKLHL8</i> | miR-182-3p                           | 2 |
| <i>circKLHL8</i> | miR-182-5p                           | 1 |
| <i>circKLHL8</i> | miR-1825                             | 4 |
| <i>circKLHL8</i> | miR-183-3p                           | 1 |
| <i>circKLHL8</i> | miR-183-5p.1                         | 5 |
| <i>circKLHL8</i> | miR-183-5p.2                         | 2 |
| <i>circKLHL8</i> | miR-185-5p                           | 2 |
| <i>circKLHL8</i> | miR-186-5p                           | 4 |
| <i>circKLHL8</i> | miR-188-5p                           | 2 |
| <i>circKLHL8</i> | miR-18a-3p                           | 3 |
| <i>circKLHL8</i> | miR-19-5p                            | 4 |
| <i>circKLHL8</i> | miR-190-5p                           | 2 |
| <i>circKLHL8</i> | miR-1910-3p/6511a-5p                 | 1 |
| <i>circKLHL8</i> | miR-1911-3p                          | 1 |
| <i>circKLHL8</i> | miR-1911-5p                          | 1 |
| <i>circKLHL8</i> | miR-1914-5p                          | 3 |
| <i>circKLHL8</i> | miR-1915-3p/6764-5p                  | 1 |
| <i>circKLHL8</i> | miR-192-3p                           | 2 |

|                  |                     |   |
|------------------|---------------------|---|
| <i>circKLHL8</i> | miR-193b-5p         | 1 |
| <i>circKLHL8</i> | miR-194-3p          | 3 |
| <i>circKLHL8</i> | miR-196a-3p         | 1 |
| <i>circKLHL8</i> | miR-196b-3p         | 1 |
| <i>circKLHL8</i> | miR-197-3p          | 2 |
| <i>circKLHL8</i> | miR-1972            | 1 |
| <i>circKLHL8</i> | miR-198             | 2 |
| <i>circKLHL8</i> | miR-199-3p          | 5 |
| <i>circKLHL8</i> | miR-199-5p          | 4 |
| <i>circKLHL8</i> | miR-200-3p/429      | 3 |
| <i>circKLHL8</i> | miR-200c-5p/550a-3p | 2 |
| <i>circKLHL8</i> | miR-202-3p          | 1 |
| <i>circKLHL8</i> | miR-203a-3p.1       | 4 |
| <i>circKLHL8</i> | miR-203a-5p         | 2 |
| <i>circKLHL8</i> | miR-203b-3p         | 3 |
| <i>circKLHL8</i> | miR-203b-5p/6718-5p | 1 |
| <i>circKLHL8</i> | miR-204-3p/4646-5p  | 1 |
| <i>circKLHL8</i> | miR-205-5p          | 2 |
| <i>circKLHL8</i> | miR-2052            | 4 |
| <i>circKLHL8</i> | miR-2054            | 2 |
| <i>circKLHL8</i> | miR-208-5p          | 2 |
| <i>circKLHL8</i> | miR-20b-3p          | 1 |
| <i>circKLHL8</i> | miR-21-3p/3591-3p   | 1 |
| <i>circKLHL8</i> | miR-2113            | 1 |
| <i>circKLHL8</i> | miR-2114-3p         | 2 |
| <i>circKLHL8</i> | miR-2115-5p         | 3 |
| <i>circKLHL8</i> | miR-2116-3p         | 3 |
| <i>circKLHL8</i> | miR-2116-5p         | 1 |
| <i>circKLHL8</i> | miR-2117            | 1 |
| <i>circKLHL8</i> | miR-212-5p          | 1 |
| <i>circKLHL8</i> | miR-214-3p/3619-5p  | 1 |
| <i>circKLHL8</i> | miR-214-5p          | 3 |
| <i>circKLHL8</i> | miR-216a-5p         | 3 |
| <i>circKLHL8</i> | miR-216b-3p         | 2 |
| <i>circKLHL8</i> | miR-216b-5p         | 3 |
| <i>circKLHL8</i> | miR-217             | 1 |
| <i>circKLHL8</i> | miR-218-1-3p        | 2 |
| <i>circKLHL8</i> | miR-218-2-3p        | 2 |



|                  |                                     |   |
|------------------|-------------------------------------|---|
| <i>circKLHL8</i> | miR-218-5p                          | 1 |
| <i>circKLHL8</i> | miR-219-5p                          | 1 |
| <i>circKLHL8</i> | miR-219a-1-3p                       | 1 |
| <i>circKLHL8</i> | miR-219a-2-3p                       | 2 |
| <i>circKLHL8</i> | miR-219b-3p                         | 2 |
| <i>circKLHL8</i> | miR-22-5p                           | 1 |
| <i>circKLHL8</i> | miR-221-5p/8073                     | 2 |
| <i>circKLHL8</i> | miR-222-5p                          | 2 |
| <i>circKLHL8</i> | miR-223-3p                          | 1 |
| <i>circKLHL8</i> | miR-223-5p                          | 1 |
| <i>circKLHL8</i> | miR-224-5p                          | 2 |
| <i>circKLHL8</i> | miR-2276-5p                         | 1 |
| <i>circKLHL8</i> | miR-2277-3p                         | 1 |
| <i>circKLHL8</i> | miR-2278                            | 3 |
| <i>circKLHL8</i> | miR-23-3p                           | 2 |
| <i>circKLHL8</i> | miR-2355-3p                         | 2 |
| <i>circKLHL8</i> | miR-2355-5p                         | 1 |
| <i>circKLHL8</i> | miR-2392                            | 5 |
| <i>circKLHL8</i> | miR-24-3p                           | 3 |
| <i>circKLHL8</i> | miR-2467-3p                         | 3 |
| <i>circKLHL8</i> | miR-25-3p/32-5p/92-3p/363-3p/367-3p | 1 |
| <i>circKLHL8</i> | miR-25-5p                           | 2 |
| <i>circKLHL8</i> | miR-26-3p                           | 2 |
| <i>circKLHL8</i> | miR-26-5p                           | 2 |
| <i>circKLHL8</i> | miR-2681-5p                         | 2 |
| <i>circKLHL8</i> | miR-2682-3p/6781-3p                 | 1 |
| <i>circKLHL8</i> | miR-27-3p                           | 1 |
| <i>circKLHL8</i> | miR-27a-5p                          | 2 |
| <i>circKLHL8</i> | miR-27b-5p                          | 3 |
| <i>circKLHL8</i> | miR-28-5p/708-5p                    | 2 |
| <i>circKLHL8</i> | miR-2861                            | 1 |
| <i>circKLHL8</i> | miR-29-3p                           | 3 |
| <i>circKLHL8</i> | miR-2909                            | 1 |
| <i>circKLHL8</i> | miR-296-3p                          | 1 |
| <i>circKLHL8</i> | miR-297                             | 1 |
| <i>circKLHL8</i> | miR-298                             | 4 |
| <i>circKLHL8</i> | miR-299-3p                          | 4 |
| <i>circKLHL8</i> | miR-29a-5p                          | 2 |

|                  |                                              |   |
|------------------|----------------------------------------------|---|
| <i>circKLHL8</i> | miR-29b-2-5p                                 | 2 |
| <i>circKLHL8</i> | miR-30-5p                                    | 1 |
| <i>circKLHL8</i> | miR-301a-5p/301b-5p                          | 2 |
| <i>circKLHL8</i> | miR-302a-5p                                  | 2 |
| <i>circKLHL8</i> | miR-302c-3p.2/520-3p                         | 2 |
| <i>circKLHL8</i> | miR-302f                                     | 4 |
| <i>circKLHL8</i> | miR-3064-3p                                  | 2 |
| <i>circKLHL8</i> | miR-3064-5p                                  | 1 |
| <i>circKLHL8</i> | miR-3065-3p                                  | 6 |
| <i>circKLHL8</i> | miR-3065-5p                                  | 4 |
| <i>circKLHL8</i> | miR-3074-5p                                  | 3 |
| <i>circKLHL8</i> | miR-30b-3p/1273h-5p/3689-3p/6779-5p/6780a-5p |   |
| <i>circKLHL8</i> | miR-30c-3p/6788-5p                           | 1 |
| <i>circKLHL8</i> | miR-3115                                     | 2 |
| <i>circKLHL8</i> | miR-3120-3p                                  | 2 |
| <i>circKLHL8</i> | miR-3121-5p                                  | 3 |
| <i>circKLHL8</i> | miR-3124-3p                                  | 1 |
| <i>circKLHL8</i> | miR-3125/3916/6859-5p                        | 1 |
| <i>circKLHL8</i> | miR-3126-3p                                  | 4 |
| <i>circKLHL8</i> | miR-3127-3p/6756-3p                          | 1 |
| <i>circKLHL8</i> | miR-3127-5p                                  | 1 |
| <i>circKLHL8</i> | miR-3128                                     | 2 |
| <i>circKLHL8</i> | miR-3130-5p/4482-5p                          | 1 |
| <i>circKLHL8</i> | miR-3133                                     | 4 |
| <i>circKLHL8</i> | miR-3134                                     | 4 |
| <i>circKLHL8</i> | miR-3135b                                    | 1 |
| <i>circKLHL8</i> | miR-3136-3p/7155-3p                          | 2 |
| <i>circKLHL8</i> | miR-3136-5p/4439                             | 1 |
| <i>circKLHL8</i> | miR-3137                                     | 1 |
| <i>circKLHL8</i> | miR-3138                                     | 1 |
| <i>circKLHL8</i> | miR-3140-3p                                  | 2 |
| <i>circKLHL8</i> | miR-3145-5p                                  | 1 |
| <i>circKLHL8</i> | miR-3146                                     | 1 |
| <i>circKLHL8</i> | miR-3148                                     | 2 |
| <i>circKLHL8</i> | miR-3150b-3p                                 | 1 |
| <i>circKLHL8</i> | miR-3151-3p                                  | 1 |
| <i>circKLHL8</i> | miR-3151-5p                                  | 2 |
| <i>circKLHL8</i> | miR-3152-3p                                  | 1 |

|                  |                           |   |
|------------------|---------------------------|---|
| <i>circKLHL8</i> | miR-3152-5p               | 3 |
| <i>circKLHL8</i> | miR-3153/6733-5p/6739-5p  | 2 |
| <i>circKLHL8</i> | miR-3154                  | 1 |
| <i>circKLHL8</i> | miR-3157-3p               | 2 |
| <i>circKLHL8</i> | miR-3158-3p               | 1 |
| <i>circKLHL8</i> | miR-3158-5p               | 5 |
| <i>circKLHL8</i> | miR-3160-3p               | 1 |
| <i>circKLHL8</i> | miR-3161                  | 3 |
| <i>circKLHL8</i> | miR-3162-3p               | 1 |
| <i>circKLHL8</i> | miR-3162-5p               | 1 |
| <i>circKLHL8</i> | miR-3163                  | 2 |
| <i>circKLHL8</i> | miR-3165                  | 6 |
| <i>circKLHL8</i> | miR-3168                  | 1 |
| <i>circKLHL8</i> | miR-3173-5p               | 1 |
| <i>circKLHL8</i> | miR-3174                  | 1 |
| <i>circKLHL8</i> | miR-3176/3922-3p          | 1 |
| <i>circKLHL8</i> | miR-3179                  | 1 |
| <i>circKLHL8</i> | miR-3180-5p               | 1 |
| <i>circKLHL8</i> | miR-3182                  | 2 |
| <i>circKLHL8</i> | miR-3183/4723-3p/6769b-3p | 2 |
| <i>circKLHL8</i> | miR-3189-3p               | 1 |
| <i>circKLHL8</i> | miR-3189-5p               | 1 |
| <i>circKLHL8</i> | miR-3190-3p               | 2 |
| <i>circKLHL8</i> | miR-3190-5p               | 1 |
| <i>circKLHL8</i> | miR-3191-5p               | 1 |
| <i>circKLHL8</i> | miR-3192-3p               | 2 |
| <i>circKLHL8</i> | miR-3192-5p               | 1 |
| <i>circKLHL8</i> | miR-3194-3p               | 2 |
| <i>circKLHL8</i> | miR-3198/4309             | 7 |
| <i>circKLHL8</i> | miR-32-3p                 | 1 |
| <i>circKLHL8</i> | miR-320                   | 1 |
| <i>circKLHL8</i> | miR-3200-5p               | 1 |
| <i>circKLHL8</i> | miR-3202                  | 2 |
| <i>circKLHL8</i> | miR-320e                  | 1 |
| <i>circKLHL8</i> | miR-323-3p                | 1 |
| <i>circKLHL8</i> | miR-323a-5p               | 3 |
| <i>circKLHL8</i> | miR-324-3p/1913           | 3 |
| <i>circKLHL8</i> | miR-324-5p                | 1 |

|                  |                    |   |
|------------------|--------------------|---|
| <i>circKLHL8</i> | miR-325            | 1 |
| <i>circKLHL8</i> | miR-326            | 1 |
| <i>circKLHL8</i> | miR-328-3p         | 1 |
| <i>circKLHL8</i> | miR-330-3p         | 2 |
| <i>circKLHL8</i> | miR-330-3p.2       | 3 |
| <i>circKLHL8</i> | miR-335-3p         | 3 |
| <i>circKLHL8</i> | miR-338-3p         | 2 |
| <i>circKLHL8</i> | miR-338-5p         | 1 |
| <i>circKLHL8</i> | miR-33a-3p         | 2 |
| <i>circKLHL8</i> | miR-34-5p/449-5p   | 3 |
| <i>circKLHL8</i> | miR-340-5p         | 1 |
| <i>circKLHL8</i> | miR-342-5p/4664-5p | 1 |
| <i>circKLHL8</i> | miR-34b-5p/449c-5p | 1 |
| <i>circKLHL8</i> | miR-3529-3p        | 1 |
| <i>circKLHL8</i> | miR-3591-5p        | 2 |
| <i>circKLHL8</i> | miR-3606-5p        | 1 |
| <i>circKLHL8</i> | miR-3607-5p        | 1 |
| <i>circKLHL8</i> | miR-3611           | 4 |
| <i>circKLHL8</i> | miR-3612           | 1 |
| <i>circKLHL8</i> | miR-3613-3p        | 1 |
| <i>circKLHL8</i> | miR-3614-3p        | 2 |
| <i>circKLHL8</i> | miR-3614-5p        | 3 |
| <i>circKLHL8</i> | miR-3618           | 2 |
| <i>circKLHL8</i> | miR-3619-3p        | 1 |
| <i>circKLHL8</i> | miR-362-5p/500b-5p | 1 |
| <i>circKLHL8</i> | miR-3622a-5p       | 1 |
| <i>circKLHL8</i> | miR-3622b-5p       | 1 |
| <i>circKLHL8</i> | miR-363-5p/6745    | 1 |
| <i>circKLHL8</i> | miR-3646           | 5 |
| <i>circKLHL8</i> | miR-3650           | 1 |
| <i>circKLHL8</i> | miR-3654           | 1 |
| <i>circKLHL8</i> | miR-3655           | 2 |
| <i>circKLHL8</i> | miR-3659           | 2 |
| <i>circKLHL8</i> | miR-3662           | 4 |
| <i>circKLHL8</i> | miR-3663-5p        | 1 |
| <i>circKLHL8</i> | miR-3664-3p        | 1 |
| <i>circKLHL8</i> | miR-3664-5p        | 1 |
| <i>circKLHL8</i> | miR-3665           | 3 |

|                  |                           |   |
|------------------|---------------------------|---|
| <i>circKLHL8</i> | miR-3667-3p               | 1 |
| <i>circKLHL8</i> | miR-3668                  | 1 |
| <i>circKLHL8</i> | miR-367-5p                | 2 |
| <i>circKLHL8</i> | miR-3670                  | 2 |
| <i>circKLHL8</i> | miR-3674                  | 1 |
| <i>circKLHL8</i> | miR-3675-3p               | 3 |
| <i>circKLHL8</i> | miR-3675-5p               | 1 |
| <i>circKLHL8</i> | miR-3677-5p               | 3 |
| <i>circKLHL8</i> | miR-3678-3p               | 3 |
| <i>circKLHL8</i> | miR-3680-3p               | 4 |
| <i>circKLHL8</i> | miR-3681-5p               | 4 |
| <i>circKLHL8</i> | miR-3682-3p               | 3 |
| <i>circKLHL8</i> | miR-3683                  | 2 |
| <i>circKLHL8</i> | miR-3686                  | 2 |
| <i>circKLHL8</i> | miR-3688-3p               | 3 |
| <i>circKLHL8</i> | miR-3688-5p               | 6 |
| <i>circKLHL8</i> | miR-3690                  | 1 |
| <i>circKLHL8</i> | miR-3691-5p               | 4 |
| <i>circKLHL8</i> | miR-3692-5p               | 2 |
| <i>circKLHL8</i> | miR-370-3p                | 1 |
| <i>circKLHL8</i> | miR-371-5p                | 1 |
| <i>circKLHL8</i> | miR-3714                  | 2 |
| <i>circKLHL8</i> | miR-371b-5p/373-5p/616-5p | 1 |
| <i>circKLHL8</i> | miR-372-5p                | 1 |
| <i>circKLHL8</i> | miR-374-5p                | 2 |
| <i>circKLHL8</i> | miR-374b-3p               | 2 |
| <i>circKLHL8</i> | miR-374c-3p               | 1 |
| <i>circKLHL8</i> | miR-376-3p                | 1 |
| <i>circKLHL8</i> | miR-376b-5p/376c-5p       | 4 |
| <i>circKLHL8</i> | miR-376c-3p               | 1 |
| <i>circKLHL8</i> | miR-377-3p                | 1 |
| <i>circKLHL8</i> | miR-378j/6839-5p          | 3 |
| <i>circKLHL8</i> | miR-380-3p                | 1 |
| <i>circKLHL8</i> | miR-380-5p/563            | 3 |
| <i>circKLHL8</i> | miR-381-5p                | 1 |
| <i>circKLHL8</i> | miR-382-3p                | 2 |
| <i>circKLHL8</i> | miR-383-3p                | 6 |
| <i>circKLHL8</i> | miR-383-5p.1              | 3 |

|                  |                           |   |
|------------------|---------------------------|---|
| <i>circKLHL8</i> | miR-3907                  | 2 |
| <i>circKLHL8</i> | miR-3909                  | 2 |
| <i>circKLHL8</i> | miR-3910                  | 2 |
| <i>circKLHL8</i> | miR-3911                  | 1 |
| <i>circKLHL8</i> | miR-3912-5p               | 1 |
| <i>circKLHL8</i> | miR-3913-3p               | 1 |
| <i>circKLHL8</i> | miR-3915                  | 1 |
| <i>circKLHL8</i> | miR-3918                  | 1 |
| <i>circKLHL8</i> | miR-3920                  | 2 |
| <i>circKLHL8</i> | miR-3921/4653-5p          | 2 |
| <i>circKLHL8</i> | miR-3922-5p               | 1 |
| <i>circKLHL8</i> | miR-3925-3p               | 2 |
| <i>circKLHL8</i> | miR-3928-3p               | 2 |
| <i>circKLHL8</i> | miR-3928-5p/6806-3p       | 1 |
| <i>circKLHL8</i> | miR-3934-3p               | 1 |
| <i>circKLHL8</i> | miR-3934-5p               | 2 |
| <i>circKLHL8</i> | miR-3935                  | 1 |
| <i>circKLHL8</i> | miR-3936                  | 1 |
| <i>circKLHL8</i> | miR-3938                  | 1 |
| <i>circKLHL8</i> | miR-3940-5p/4507          | 1 |
| <i>circKLHL8</i> | miR-3942-3p               | 1 |
| <i>circKLHL8</i> | miR-3943                  | 1 |
| <i>circKLHL8</i> | miR-3977                  | 4 |
| <i>circKLHL8</i> | miR-3978                  | 2 |
| <i>circKLHL8</i> | miR-411-5p.1              | 2 |
| <i>circKLHL8</i> | miR-411-5p.2              | 1 |
| <i>circKLHL8</i> | miR-412-3p/6754-3p        | 3 |
| <i>circKLHL8</i> | miR-412-5p                | 1 |
| <i>circKLHL8</i> | miR-421                   | 1 |
| <i>circKLHL8</i> | miR-424-3p                | 1 |
| <i>circKLHL8</i> | miR-4254                  | 1 |
| <i>circKLHL8</i> | miR-4257                  | 3 |
| <i>circKLHL8</i> | miR-4259                  | 5 |
| <i>circKLHL8</i> | miR-4265/4296/4322        | 3 |
| <i>circKLHL8</i> | miR-4266                  | 2 |
| <i>circKLHL8</i> | miR-4268                  | 1 |
| <i>circKLHL8</i> | miR-4269/6715b-5p         | 3 |
| <i>circKLHL8</i> | miR-4271/4725-3p/6780b-5p | 1 |

|                  |                  |   |
|------------------|------------------|---|
| <i>circKLHL8</i> | miR-4274         | 1 |
| <i>circKLHL8</i> | miR-4275         | 1 |
| <i>circKLHL8</i> | miR-4276         | 2 |
| <i>circKLHL8</i> | miR-4279         | 3 |
| <i>circKLHL8</i> | miR-4280         | 4 |
| <i>circKLHL8</i> | miR-4281         | 1 |
| <i>circKLHL8</i> | miR-4282         | 2 |
| <i>circKLHL8</i> | miR-4283         | 1 |
| <i>circKLHL8</i> | miR-4284         | 3 |
| <i>circKLHL8</i> | miR-4289         | 1 |
| <i>circKLHL8</i> | miR-4291         | 2 |
| <i>circKLHL8</i> | miR-4293         | 2 |
| <i>circKLHL8</i> | miR-4297/5581-5p | 2 |
| <i>circKLHL8</i> | miR-4299         | 4 |
| <i>circKLHL8</i> | miR-4302         | 1 |
| <i>circKLHL8</i> | miR-4303         | 2 |
| <i>circKLHL8</i> | miR-4305         | 1 |
| <i>circKLHL8</i> | miR-4307         | 7 |
| <i>circKLHL8</i> | miR-431-5p       | 2 |
| <i>circKLHL8</i> | miR-4310/7157-5p | 2 |
| <i>circKLHL8</i> | miR-4311         | 2 |
| <i>circKLHL8</i> | miR-4312         | 1 |
| <i>circKLHL8</i> | miR-4313         | 1 |
| <i>circKLHL8</i> | miR-4314         | 1 |
| <i>circKLHL8</i> | miR-4316         | 1 |
| <i>circKLHL8</i> | miR-432-3p       | 5 |
| <i>circKLHL8</i> | miR-432-5p       | 1 |
| <i>circKLHL8</i> | miR-4323         | 1 |
| <i>circKLHL8</i> | miR-4326         | 1 |
| <i>circKLHL8</i> | miR-4417         | 1 |
| <i>circKLHL8</i> | miR-4421/5699-3p | 1 |
| <i>circKLHL8</i> | miR-4422         | 3 |
| <i>circKLHL8</i> | miR-4423-5p      | 1 |
| <i>circKLHL8</i> | miR-4424         | 1 |
| <i>circKLHL8</i> | miR-4427         | 2 |
| <i>circKLHL8</i> | miR-4432         | 4 |
| <i>circKLHL8</i> | miR-4433a-3p     | 3 |
| <i>circKLHL8</i> | miR-4433b-3p     | 2 |

|                  |                                              |   |
|------------------|----------------------------------------------|---|
| <i>circKLHL8</i> | miR-4434/4516/5703                           | 3 |
| <i>circKLHL8</i> | miR-4436b-3p/4632-5p/6735-5p/6879-5p/7843-5p |   |
| <i>circKLHL8</i> | miR-4438                                     | 1 |
| <i>circKLHL8</i> | miR-4443                                     | 2 |
| <i>circKLHL8</i> | miR-4444                                     | 1 |
| <i>circKLHL8</i> | miR-4445-5p                                  | 1 |
| <i>circKLHL8</i> | miR-4446-3p                                  | 1 |
| <i>circKLHL8</i> | miR-4446-5p                                  | 1 |
| <i>circKLHL8</i> | miR-4447/4472                                | 2 |
| <i>circKLHL8</i> | miR-4448                                     | 1 |
| <i>circKLHL8</i> | miR-4452                                     | 1 |
| <i>circKLHL8</i> | miR-4453/4538                                | 4 |
| <i>circKLHL8</i> | miR-4455                                     | 2 |
| <i>circKLHL8</i> | miR-4456                                     | 4 |
| <i>circKLHL8</i> | miR-4457                                     | 1 |
| <i>circKLHL8</i> | miR-4459                                     | 3 |
| <i>circKLHL8</i> | miR-4460                                     | 2 |
| <i>circKLHL8</i> | miR-4461                                     | 2 |
| <i>circKLHL8</i> | miR-4468                                     | 4 |
| <i>circKLHL8</i> | miR-4470                                     | 3 |
| <i>circKLHL8</i> | miR-4474-3p                                  | 3 |
| <i>circKLHL8</i> | miR-4476/6876-5p                             | 1 |
| <i>circKLHL8</i> | miR-4477a                                    | 1 |
| <i>circKLHL8</i> | miR-448                                      | 2 |
| <i>circKLHL8</i> | miR-4480                                     | 1 |
| <i>circKLHL8</i> | miR-4481/4745-5p                             | 4 |
| <i>circKLHL8</i> | miR-4482-3p                                  | 2 |
| <i>circKLHL8</i> | miR-4484                                     | 1 |
| <i>circKLHL8</i> | miR-4487                                     | 1 |
| <i>circKLHL8</i> | miR-4489                                     | 1 |
| <i>circKLHL8</i> | miR-4490                                     | 1 |
| <i>circKLHL8</i> | miR-4491/4657                                | 4 |
| <i>circKLHL8</i> | miR-4493                                     | 2 |
| <i>circKLHL8</i> | miR-449c-3p                                  | 1 |
| <i>circKLHL8</i> | miR-4506                                     | 1 |
| <i>circKLHL8</i> | miR-4508                                     | 1 |
| <i>circKLHL8</i> | miR-4509                                     | 1 |
| <i>circKLHL8</i> | miR-450b-3p/769-3p                           | 3 |



|                  |                       |   |
|------------------|-----------------------|---|
| <i>circKLHL8</i> | miR-450b-5p           | 4 |
| <i>circKLHL8</i> | miR-4511              | 3 |
| <i>circKLHL8</i> | miR-4512              | 1 |
| <i>circKLHL8</i> | miR-4514/4692         | 3 |
| <i>circKLHL8</i> | miR-4517              | 1 |
| <i>circKLHL8</i> | miR-4519              | 1 |
| <i>circKLHL8</i> | miR-451b              | 1 |
| <i>circKLHL8</i> | miR-452-5p/892-3p     | 1 |
| <i>circKLHL8</i> | miR-4520-2-3p         | 1 |
| <i>circKLHL8</i> | miR-4520-3p           | 4 |
| <i>circKLHL8</i> | miR-4524-5p           | 1 |
| <i>circKLHL8</i> | miR-4529-3p           | 1 |
| <i>circKLHL8</i> | miR-4529-5p           | 2 |
| <i>circKLHL8</i> | miR-4530              | 2 |
| <i>circKLHL8</i> | miR-4531              | 5 |
| <i>circKLHL8</i> | miR-4533              | 2 |
| <i>circKLHL8</i> | miR-4534/8082         | 4 |
| <i>circKLHL8</i> | miR-4535              | 1 |
| <i>circKLHL8</i> | miR-455-3p.2          | 5 |
| <i>circKLHL8</i> | miR-4633-3p/6500-5p   | 2 |
| <i>circKLHL8</i> | miR-4633-5p           | 2 |
| <i>circKLHL8</i> | miR-4639-3p           | 1 |
| <i>circKLHL8</i> | miR-4640-3p           | 2 |
| <i>circKLHL8</i> | miR-4640-5p           | 1 |
| <i>circKLHL8</i> | miR-4641              | 2 |
| <i>circKLHL8</i> | miR-4642              | 1 |
| <i>circKLHL8</i> | miR-4643              | 1 |
| <i>circKLHL8</i> | miR-4645-5p/4673      | 1 |
| <i>circKLHL8</i> | miR-4646-3p           | 2 |
| <i>circKLHL8</i> | miR-4648              | 6 |
| <i>circKLHL8</i> | miR-4650-5p           | 1 |
| <i>circKLHL8</i> | miR-4653-3p           | 2 |
| <i>circKLHL8</i> | miR-4654/4769-5p      | 6 |
| <i>circKLHL8</i> | miR-4656              | 2 |
| <i>circKLHL8</i> | miR-4658/6790-5p      | 1 |
| <i>circKLHL8</i> | miR-4659a-3p/4659b-3p | 5 |
| <i>circKLHL8</i> | miR-4659a-5p/4659b-5p | 3 |
| <i>circKLHL8</i> | miR-466               | 1 |

|                  |                     |   |
|------------------|---------------------|---|
| <i>circKLHL8</i> | miR-4661-5p         | 1 |
| <i>circKLHL8</i> | miR-4662-5p         | 2 |
| <i>circKLHL8</i> | miR-4666a-5p        | 2 |
| <i>circKLHL8</i> | miR-4667-3p         | 2 |
| <i>circKLHL8</i> | miR-4668-3p         | 3 |
| <i>circKLHL8</i> | miR-4668-5p         | 2 |
| <i>circKLHL8</i> | miR-4670-3p         | 3 |
| <i>circKLHL8</i> | miR-4671-5p         | 2 |
| <i>circKLHL8</i> | miR-4674            | 2 |
| <i>circKLHL8</i> | miR-4675/4741       | 2 |
| <i>circKLHL8</i> | miR-4677-3p         | 2 |
| <i>circKLHL8</i> | miR-4679            | 2 |
| <i>circKLHL8</i> | miR-4680-3p         | 2 |
| <i>circKLHL8</i> | miR-4680-5p         | 1 |
| <i>circKLHL8</i> | miR-4681            | 1 |
| <i>circKLHL8</i> | miR-4682            | 2 |
| <i>circKLHL8</i> | miR-4683            | 1 |
| <i>circKLHL8</i> | miR-4684-5p         | 2 |
| <i>circKLHL8</i> | miR-4686            | 2 |
| <i>circKLHL8</i> | miR-4687-3p         | 1 |
| <i>circKLHL8</i> | miR-4689/6858-5p    | 1 |
| <i>circKLHL8</i> | miR-4690-3p/5685    | 2 |
| <i>circKLHL8</i> | miR-4690-5p         | 4 |
| <i>circKLHL8</i> | miR-4691-5p/6792-3p | 2 |
| <i>circKLHL8</i> | miR-4693-3p         | 1 |
| <i>circKLHL8</i> | miR-4694-3p         | 8 |
| <i>circKLHL8</i> | miR-4694-5p         | 1 |
| <i>circKLHL8</i> | miR-4695-5p         | 1 |
| <i>circKLHL8</i> | miR-4696            | 2 |
| <i>circKLHL8</i> | miR-4697-3p         | 1 |
| <i>circKLHL8</i> | miR-4698            | 3 |
| <i>circKLHL8</i> | miR-4699-3p         | 1 |
| <i>circKLHL8</i> | miR-4699-5p         | 1 |
| <i>circKLHL8</i> | miR-4703-3p         | 1 |
| <i>circKLHL8</i> | miR-4704-3p         | 2 |
| <i>circKLHL8</i> | miR-4704-5p         | 1 |
| <i>circKLHL8</i> | miR-4708-5p         | 1 |
| <i>circKLHL8</i> | miR-4709-3p         | 3 |

|                  |                             |   |
|------------------|-----------------------------|---|
| <i>circKLHL8</i> | miR-4709-5p                 | 3 |
| <i>circKLHL8</i> | miR-4711-3p                 | 2 |
| <i>circKLHL8</i> | miR-4711-5p                 | 3 |
| <i>circKLHL8</i> | miR-4714-3p                 | 1 |
| <i>circKLHL8</i> | miR-4714-5p                 | 1 |
| <i>circKLHL8</i> | miR-4715-5p                 | 5 |
| <i>circKLHL8</i> | miR-4716-5p                 | 3 |
| <i>circKLHL8</i> | miR-4717-3p                 | 1 |
| <i>circKLHL8</i> | miR-4717-5p                 | 2 |
| <i>circKLHL8</i> | miR-4719                    | 1 |
| <i>circKLHL8</i> | miR-4720-5p/4799-3p/5588-5p | 2 |
| <i>circKLHL8</i> | miR-4722-3p/6727-3p         | 1 |
| <i>circKLHL8</i> | miR-4722-5p                 | 3 |
| <i>circKLHL8</i> | miR-4724-3p                 | 1 |
| <i>circKLHL8</i> | miR-4724-5p                 | 2 |
| <i>circKLHL8</i> | miR-4726-3p                 | 1 |
| <i>circKLHL8</i> | miR-4727-3p                 | 2 |
| <i>circKLHL8</i> | miR-4727-5p                 | 1 |
| <i>circKLHL8</i> | miR-4728-3p                 | 2 |
| <i>circKLHL8</i> | miR-4729                    | 1 |
| <i>circKLHL8</i> | miR-4730                    | 2 |
| <i>circKLHL8</i> | miR-4731-3p/4801            | 2 |
| <i>circKLHL8</i> | miR-4732-5p                 | 1 |
| <i>circKLHL8</i> | miR-4733-3p                 | 1 |
| <i>circKLHL8</i> | miR-4736                    | 1 |
| <i>circKLHL8</i> | miR-4739                    | 1 |
| <i>circKLHL8</i> | miR-4742-3p                 | 1 |
| <i>circKLHL8</i> | miR-4742-5p                 | 3 |
| <i>circKLHL8</i> | miR-4743-5p                 | 1 |
| <i>circKLHL8</i> | miR-4744                    | 1 |
| <i>circKLHL8</i> | miR-4747-3p                 | 1 |
| <i>circKLHL8</i> | miR-4747-5p/5196-5p         | 1 |
| <i>circKLHL8</i> | miR-4750-3p                 | 1 |
| <i>circKLHL8</i> | miR-4751                    | 1 |
| <i>circKLHL8</i> | miR-4752                    | 3 |
| <i>circKLHL8</i> | miR-4753-3p                 | 4 |
| <i>circKLHL8</i> | miR-4753-5p                 | 1 |
| <i>circKLHL8</i> | miR-4755-3p                 | 1 |

|                  |                     |   |
|------------------|---------------------|---|
| <i>circKLHL8</i> | miR-4755-5p/5006-3p | 1 |
| <i>circKLHL8</i> | miR-4758-3p         | 1 |
| <i>circKLHL8</i> | miR-4760-5p/8061    | 1 |
| <i>circKLHL8</i> | miR-4761-3p         | 1 |
| <i>circKLHL8</i> | miR-4762-3p         | 2 |
| <i>circKLHL8</i> | miR-4762-5p         | 1 |
| <i>circKLHL8</i> | miR-4763-5p         | 1 |
| <i>circKLHL8</i> | miR-4766-3p         | 1 |
| <i>circKLHL8</i> | miR-4766-5p         | 1 |
| <i>circKLHL8</i> | miR-4768-3p         | 3 |
| <i>circKLHL8</i> | miR-4768-5p/6833-3p | 2 |
| <i>circKLHL8</i> | miR-4769-3p/6817-5p | 3 |
| <i>circKLHL8</i> | miR-4772-5p         | 3 |
| <i>circKLHL8</i> | miR-4773            | 4 |
| <i>circKLHL8</i> | miR-4774-3p         | 3 |
| <i>circKLHL8</i> | miR-4774-5p         | 1 |
| <i>circKLHL8</i> | miR-4776-3p         | 2 |
| <i>circKLHL8</i> | miR-4776-5p         | 1 |
| <i>circKLHL8</i> | miR-4778-3p         | 9 |
| <i>circKLHL8</i> | miR-4778-5p         | 1 |
| <i>circKLHL8</i> | miR-4779            | 1 |
| <i>circKLHL8</i> | miR-4782-5p/5706    | 2 |
| <i>circKLHL8</i> | miR-4786-3p         | 1 |
| <i>circKLHL8</i> | miR-4789-3p         | 1 |
| <i>circKLHL8</i> | miR-4790-3p         | 2 |
| <i>circKLHL8</i> | miR-4793-5p         | 1 |
| <i>circKLHL8</i> | miR-4796-3p         | 3 |
| <i>circKLHL8</i> | miR-4796-5p         | 3 |
| <i>circKLHL8</i> | miR-4799-5p         | 3 |
| <i>circKLHL8</i> | miR-4800-5p         | 1 |
| <i>circKLHL8</i> | miR-4802-3p         | 3 |
| <i>circKLHL8</i> | miR-4802-5p         | 4 |
| <i>circKLHL8</i> | miR-486-3p          | 1 |
| <i>circKLHL8</i> | miR-486-5p          | 1 |
| <i>circKLHL8</i> | miR-488-5p          | 1 |
| <i>circKLHL8</i> | miR-489-3p          | 1 |
| <i>circKLHL8</i> | miR-490-5p          | 1 |
| <i>circKLHL8</i> | miR-491-3p          | 3 |

|                  |                          |   |
|------------------|--------------------------|---|
| <i>circKLHL8</i> | miR-491-5p               | 2 |
| <i>circKLHL8</i> | miR-493-3p               | 1 |
| <i>circKLHL8</i> | miR-493-5p               | 2 |
| <i>circKLHL8</i> | miR-494-3p               | 2 |
| <i>circKLHL8</i> | miR-495-3p               | 1 |
| <i>circKLHL8</i> | miR-496.1                | 1 |
| <i>circKLHL8</i> | miR-497-3p               | 1 |
| <i>circKLHL8</i> | miR-5000-3p              | 1 |
| <i>circKLHL8</i> | miR-5000-5p              | 2 |
| <i>circKLHL8</i> | miR-5001-3p              | 1 |
| <i>circKLHL8</i> | miR-5002-5p              | 1 |
| <i>circKLHL8</i> | miR-5003-5p              | 1 |
| <i>circKLHL8</i> | miR-5004-3p              | 3 |
| <i>circKLHL8</i> | miR-5004-5p              | 1 |
| <i>circKLHL8</i> | miR-5008-5p              | 1 |
| <i>circKLHL8</i> | miR-500a-5p              | 3 |
| <i>circKLHL8</i> | miR-500b-3p              | 1 |
| <i>circKLHL8</i> | miR-501-5p               | 1 |
| <i>circKLHL8</i> | miR-5010-3p              | 1 |
| <i>circKLHL8</i> | miR-503-5p               | 2 |
| <i>circKLHL8</i> | miR-505-3p.2             | 1 |
| <i>circKLHL8</i> | miR-505-5p               | 1 |
| <i>circKLHL8</i> | miR-507/557              | 4 |
| <i>circKLHL8</i> | miR-508-3p               | 1 |
| <i>circKLHL8</i> | miR-508-5p               | 1 |
| <i>circKLHL8</i> | miR-5088-3p              | 1 |
| <i>circKLHL8</i> | miR-5088-5p              | 1 |
| <i>circKLHL8</i> | miR-5089-5p              | 3 |
| <i>circKLHL8</i> | miR-509-3-5p/509-5p/4418 | 1 |
| <i>circKLHL8</i> | miR-5090/6775-5p         | 1 |
| <i>circKLHL8</i> | miR-5092                 | 1 |
| <i>circKLHL8</i> | miR-5093                 | 1 |
| <i>circKLHL8</i> | miR-5094                 | 3 |
| <i>circKLHL8</i> | miR-5095/7151-3p         | 1 |
| <i>circKLHL8</i> | miR-510-3p               | 4 |
| <i>circKLHL8</i> | miR-5100                 | 1 |
| <i>circKLHL8</i> | miR-511-5p               | 1 |
| <i>circKLHL8</i> | miR-512-3p               | 2 |

|                  |                                         |   |
|------------------|-----------------------------------------|---|
| <i>circKLHL8</i> | miR-513a-5p                             | 1 |
| <i>circKLHL8</i> | miR-513b-3p                             | 1 |
| <i>circKLHL8</i> | miR-513b-5p                             | 3 |
| <i>circKLHL8</i> | miR-514a-3p                             | 1 |
| <i>circKLHL8</i> | miR-514a-5p                             | 1 |
| <i>circKLHL8</i> | miR-515-5p/519e-5p                      | 1 |
| <i>circKLHL8</i> | miR-516a-3p/516b-3p/7162-5p             | 3 |
| <i>circKLHL8</i> | miR-516b-5p                             | 2 |
| <i>circKLHL8</i> | miR-517-5p                              | 1 |
| <i>circKLHL8</i> | miR-5186                                | 3 |
| <i>circKLHL8</i> | miR-5187-3p                             | 2 |
| <i>circKLHL8</i> | miR-5187-5p                             | 1 |
| <i>circKLHL8</i> | miR-518a-5p/527                         | 1 |
| <i>circKLHL8</i> | miR-518c-5p                             | 1 |
| <i>circKLHL8</i> | miR-5190                                | 5 |
| <i>circKLHL8</i> | miR-5191                                | 1 |
| <i>circKLHL8</i> | miR-5192                                | 2 |
| <i>circKLHL8</i> | miR-5193                                | 1 |
| <i>circKLHL8</i> | miR-5195-5p                             | 1 |
| <i>circKLHL8</i> | miR-5196-3p                             | 1 |
| <i>circKLHL8</i> | miR-5197-3p                             | 3 |
| <i>circKLHL8</i> | miR-5197-5p                             | 8 |
| <i>circKLHL8</i> | miR-519d-5p                             | 2 |
| <i>circKLHL8</i> | miR-520f-5p                             | 1 |
| <i>circKLHL8</i> | miR-520g-5p                             | 2 |
| <i>circKLHL8</i> | miR-522-3p                              | 8 |
| <i>circKLHL8</i> | miR-524-3p/525-3p                       | 1 |
| <i>circKLHL8</i> | miR-524-5p                              | 1 |
| <i>circKLHL8</i> | miR-526b-5p                             | 2 |
| <i>circKLHL8</i> | miR-532-3p                              | 3 |
| <i>circKLHL8</i> | miR-532-5p                              | 2 |
| <i>circKLHL8</i> | miR-543                                 | 1 |
| <i>circKLHL8</i> | miR-544a                                | 3 |
| <i>circKLHL8</i> | miR-545-3p                              | 1 |
| <i>circKLHL8</i> | miR-545-5p                              | 2 |
| <i>circKLHL8</i> | miR-548ac/548bb-3p/548d-3p/548h-3p/548z |   |
| <i>circKLHL8</i> | miR-548ad-3p                            | 1 |
| <i>circKLHL8</i> | miR-548ah-5p/3609                       | 1 |

|                  |                                                                  |    |
|------------------|------------------------------------------------------------------|----|
| <i>circKLHL8</i> | miR-548aj-5p/548f-5p/548g-5p/548x-5p                             | 4  |
| <i>circKLHL8</i> | miR-548an                                                        | 1  |
| <i>circKLHL8</i> | miR-548ao-5p/548ax                                               | 2  |
| <i>circKLHL8</i> | miR-548ap-3p/548aa/548t-3p                                       | 2  |
| <i>circKLHL8</i> | miR-548aq-3p/548am-3p/548aj-3p/548al-3p/548ae-3p/548j-3p/548x-3p | 23 |
| <i>circKLHL8</i> | miR-548as-3p                                                     | 2  |
| <i>circKLHL8</i> | miR-548at-5p                                                     | 1  |
| <i>circKLHL8</i> | miR-548au-3p                                                     | 3  |
| <i>circKLHL8</i> | miR-548av-3p                                                     | 1  |
| <i>circKLHL8</i> | miR-548aw                                                        | 1  |
| <i>circKLHL8</i> | miR-548ay-3p/548at-3p                                            | 2  |
| <i>circKLHL8</i> | miR-548b-3p                                                      | 3  |
| <i>circKLHL8</i> | miR-548c-3p                                                      | 1  |
| <i>circKLHL8</i> | miR-548e-5p                                                      | 2  |
| <i>circKLHL8</i> | miR-548g-3p                                                      | 1  |
| <i>circKLHL8</i> | miR-548p                                                         | 5  |
| <i>circKLHL8</i> | miR-548q                                                         | 4  |
| <i>circKLHL8</i> | miR-548u/7161-5p                                                 | 1  |
| <i>circKLHL8</i> | miR-549a                                                         | 1  |
| <i>circKLHL8</i> | miR-550b-3p                                                      | 2  |
| <i>circKLHL8</i> | miR-552-3p                                                       | 2  |
| <i>circKLHL8</i> | miR-552-5p                                                       | 1  |
| <i>circKLHL8</i> | miR-556-5p                                                       | 1  |
| <i>circKLHL8</i> | miR-5571-5p                                                      | 2  |
| <i>circKLHL8</i> | miR-558                                                          | 1  |
| <i>circKLHL8</i> | miR-5581-3p                                                      | 1  |
| <i>circKLHL8</i> | miR-5582-5p                                                      | 1  |
| <i>circKLHL8</i> | miR-5583-3p                                                      | 1  |
| <i>circKLHL8</i> | miR-5584-3p                                                      | 1  |
| <i>circKLHL8</i> | miR-5585-3p                                                      | 7  |
| <i>circKLHL8</i> | miR-5585-5p                                                      | 2  |
| <i>circKLHL8</i> | miR-5586-3p                                                      | 1  |
| <i>circKLHL8</i> | miR-5586-5p                                                      | 2  |
| <i>circKLHL8</i> | miR-5587-5p                                                      | 2  |
| <i>circKLHL8</i> | miR-5589-3p                                                      | 1  |
| <i>circKLHL8</i> | miR-5590-5p                                                      | 3  |
| <i>circKLHL8</i> | miR-561-3p                                                       | 1  |
| <i>circKLHL8</i> | miR-562                                                          | 2  |

|                  |                 |   |
|------------------|-----------------|---|
| <i>circKLHL8</i> | miR-564         | 1 |
| <i>circKLHL8</i> | miR-5680        | 3 |
| <i>circKLHL8</i> | miR-5681b       | 1 |
| <i>circKLHL8</i> | miR-5683        | 2 |
| <i>circKLHL8</i> | miR-5687        | 1 |
| <i>circKLHL8</i> | miR-5689        | 3 |
| <i>circKLHL8</i> | miR-5691        | 2 |
| <i>circKLHL8</i> | miR-5692a       | 3 |
| <i>circKLHL8</i> | miR-5693        | 3 |
| <i>circKLHL8</i> | miR-5695        | 2 |
| <i>circKLHL8</i> | miR-5699-5p     | 1 |
| <i>circKLHL8</i> | miR-570-3p      | 1 |
| <i>circKLHL8</i> | miR-5700        | 2 |
| <i>circKLHL8</i> | miR-5707        | 2 |
| <i>circKLHL8</i> | miR-5708        | 2 |
| <i>circKLHL8</i> | miR-571         | 1 |
| <i>circKLHL8</i> | miR-573/3616-5p | 4 |
| <i>circKLHL8</i> | miR-574-5p      | 2 |
| <i>circKLHL8</i> | miR-575/4676-5p | 1 |
| <i>circKLHL8</i> | miR-576-3p      | 1 |
| <i>circKLHL8</i> | miR-577         | 1 |
| <i>circKLHL8</i> | miR-578         | 4 |
| <i>circKLHL8</i> | miR-580-3p      | 1 |
| <i>circKLHL8</i> | miR-580-5p      | 3 |
| <i>circKLHL8</i> | miR-581         | 2 |
| <i>circKLHL8</i> | miR-582-5p      | 3 |
| <i>circKLHL8</i> | miR-583         | 2 |
| <i>circKLHL8</i> | miR-586         | 2 |
| <i>circKLHL8</i> | miR-587         | 1 |
| <i>circKLHL8</i> | miR-589-3p      | 1 |
| <i>circKLHL8</i> | miR-589-5p      | 2 |
| <i>circKLHL8</i> | miR-591         | 2 |
| <i>circKLHL8</i> | miR-592         | 2 |
| <i>circKLHL8</i> | miR-593-3p      | 1 |
| <i>circKLHL8</i> | miR-593-5p      | 1 |
| <i>circKLHL8</i> | miR-595         | 3 |
| <i>circKLHL8</i> | miR-596         | 2 |
| <i>circKLHL8</i> | miR-597-3p      | 2 |



|                  |                    |   |
|------------------|--------------------|---|
| <i>circKLHL8</i> | miR-599            | 2 |
| <i>circKLHL8</i> | miR-600            | 3 |
| <i>circKLHL8</i> | miR-601            | 2 |
| <i>circKLHL8</i> | miR-602            | 1 |
| <i>circKLHL8</i> | miR-604            | 2 |
| <i>circKLHL8</i> | miR-605-3p         | 2 |
| <i>circKLHL8</i> | miR-605-5p         | 1 |
| <i>circKLHL8</i> | miR-6068           | 1 |
| <i>circKLHL8</i> | miR-6069           | 2 |
| <i>circKLHL8</i> | miR-6073           | 3 |
| <i>circKLHL8</i> | miR-6075           | 1 |
| <i>circKLHL8</i> | miR-6078           | 1 |
| <i>circKLHL8</i> | miR-6079           | 1 |
| <i>circKLHL8</i> | miR-608/4651       | 1 |
| <i>circKLHL8</i> | miR-6081           | 1 |
| <i>circKLHL8</i> | miR-6083           | 1 |
| <i>circKLHL8</i> | miR-6089           | 1 |
| <i>circKLHL8</i> | miR-609            | 2 |
| <i>circKLHL8</i> | miR-6090           | 1 |
| <i>circKLHL8</i> | miR-611/3131       | 1 |
| <i>circKLHL8</i> | miR-6124           | 2 |
| <i>circKLHL8</i> | miR-6126           | 1 |
| <i>circKLHL8</i> | miR-6131           | 4 |
| <i>circKLHL8</i> | miR-6134           | 6 |
| <i>circKLHL8</i> | miR-6165           | 4 |
| <i>circKLHL8</i> | miR-618            | 2 |
| <i>circKLHL8</i> | miR-619-5p/6506-5p | 1 |
| <i>circKLHL8</i> | miR-624-3p         | 1 |
| <i>circKLHL8</i> | miR-624-5p         | 1 |
| <i>circKLHL8</i> | miR-627-5p         | 1 |
| <i>circKLHL8</i> | miR-628-3p         | 1 |
| <i>circKLHL8</i> | miR-628-5p         | 1 |
| <i>circKLHL8</i> | miR-629-3p         | 2 |
| <i>circKLHL8</i> | miR-629-5p         | 1 |
| <i>circKLHL8</i> | miR-630            | 1 |
| <i>circKLHL8</i> | miR-634            | 1 |
| <i>circKLHL8</i> | miR-635/6774-5p    | 1 |
| <i>circKLHL8</i> | miR-636            | 1 |

|                  |                 |   |
|------------------|-----------------|---|
| <i>circKLHL8</i> | miR-640         | 4 |
| <i>circKLHL8</i> | miR-641/3617-5p | 1 |
| <i>circKLHL8</i> | miR-642-3p      | 1 |
| <i>circKLHL8</i> | miR-642a-5p     | 2 |
| <i>circKLHL8</i> | miR-644a        | 1 |
| <i>circKLHL8</i> | miR-646         | 2 |
| <i>circKLHL8</i> | miR-647         | 2 |
| <i>circKLHL8</i> | miR-648         | 3 |
| <i>circKLHL8</i> | miR-6500-3p     | 3 |
| <i>circKLHL8</i> | miR-6501-3p     | 3 |
| <i>circKLHL8</i> | miR-6501-5p     | 1 |
| <i>circKLHL8</i> | miR-6503-3p     | 1 |
| <i>circKLHL8</i> | miR-6504-3p     | 1 |
| <i>circKLHL8</i> | miR-6505-5p     | 2 |
| <i>circKLHL8</i> | miR-6507-3p     | 2 |
| <i>circKLHL8</i> | miR-6508-3p     | 1 |
| <i>circKLHL8</i> | miR-651-3p      | 2 |
| <i>circKLHL8</i> | miR-651-5p      | 1 |
| <i>circKLHL8</i> | miR-6510-5p     | 4 |
| <i>circKLHL8</i> | miR-6511-3p     | 2 |
| <i>circKLHL8</i> | miR-6511-5p     | 3 |
| <i>circKLHL8</i> | miR-6512-5p     | 2 |
| <i>circKLHL8</i> | miR-6513-3p     | 4 |
| <i>circKLHL8</i> | miR-6514-3p     | 4 |
| <i>circKLHL8</i> | miR-6514-5p     | 4 |
| <i>circKLHL8</i> | miR-6515-3p     | 1 |
| <i>circKLHL8</i> | miR-6515-5p     | 2 |
| <i>circKLHL8</i> | miR-6516-5p     | 4 |
| <i>circKLHL8</i> | miR-652-3p      | 2 |
| <i>circKLHL8</i> | miR-653-3p      | 1 |
| <i>circKLHL8</i> | miR-653-5p      | 2 |
| <i>circKLHL8</i> | miR-654-5p      | 2 |
| <i>circKLHL8</i> | miR-656-5p      | 1 |
| <i>circKLHL8</i> | miR-657         | 3 |
| <i>circKLHL8</i> | miR-659-3p      | 1 |
| <i>circKLHL8</i> | miR-660-3p      | 1 |
| <i>circKLHL8</i> | miR-661         | 3 |
| <i>circKLHL8</i> | miR-671-3p      | 1 |

|                  |                             |   |
|------------------|-----------------------------|---|
| <i>circKLHL8</i> | miR-671-5p                  | 1 |
| <i>circKLHL8</i> | miR-6715a-3p                | 1 |
| <i>circKLHL8</i> | miR-6716-5p                 | 2 |
| <i>circKLHL8</i> | miR-6720-5p                 | 1 |
| <i>circKLHL8</i> | miR-6721-5p                 | 2 |
| <i>circKLHL8</i> | miR-6728-5p                 | 3 |
| <i>circKLHL8</i> | miR-6729-3p                 | 2 |
| <i>circKLHL8</i> | miR-6731-3p                 | 2 |
| <i>circKLHL8</i> | miR-6732-3p                 | 1 |
| <i>circKLHL8</i> | miR-6733-3p                 | 1 |
| <i>circKLHL8</i> | miR-6734-3p                 | 1 |
| <i>circKLHL8</i> | miR-6738-3p                 | 3 |
| <i>circKLHL8</i> | miR-6741-3p                 | 2 |
| <i>circKLHL8</i> | miR-6741-5p                 | 2 |
| <i>circKLHL8</i> | miR-6742-3p                 | 1 |
| <i>circKLHL8</i> | miR-6742-5p                 | 2 |
| <i>circKLHL8</i> | miR-6744-5p                 | 6 |
| <i>circKLHL8</i> | miR-6747-3p                 | 1 |
| <i>circKLHL8</i> | miR-6747-5p                 | 1 |
| <i>circKLHL8</i> | miR-6748-3p                 | 1 |
| <i>circKLHL8</i> | miR-6748-5p                 | 2 |
| <i>circKLHL8</i> | miR-6749-3p                 | 2 |
| <i>circKLHL8</i> | miR-675-3p                  | 1 |
| <i>circKLHL8</i> | miR-6751-5p/6803-5p         | 1 |
| <i>circKLHL8</i> | miR-6752-3p                 | 1 |
| <i>circKLHL8</i> | miR-6752-5p/6842-5p/7110-5p | 1 |
| <i>circKLHL8</i> | miR-6753-5p                 | 2 |
| <i>circKLHL8</i> | miR-6756-5p/6766-5p         | 1 |
| <i>circKLHL8</i> | miR-6758-3p                 | 1 |
| <i>circKLHL8</i> | miR-6758-5p/6856-5p         | 1 |
| <i>circKLHL8</i> | miR-6759-5p                 | 3 |
| <i>circKLHL8</i> | miR-676-3p                  | 3 |
| <i>circKLHL8</i> | miR-676-5p                  | 1 |
| <i>circKLHL8</i> | miR-6760-5p                 | 1 |
| <i>circKLHL8</i> | miR-6762-3p                 | 2 |
| <i>circKLHL8</i> | miR-6762-5p/6845-5p         | 1 |
| <i>circKLHL8</i> | miR-6763-3p                 | 1 |
| <i>circKLHL8</i> | miR-6764-3p/6824-3p         | 1 |

|                  |                       |   |
|------------------|-----------------------|---|
| <i>circKLHL8</i> | miR-6768-3p           | 1 |
| <i>circKLHL8</i> | miR-6769a-3p          | 1 |
| <i>circKLHL8</i> | miR-6769a-5p/6769b-5p | 2 |
| <i>circKLHL8</i> | miR-6770-3p           | 2 |
| <i>circKLHL8</i> | miR-6770-5p           | 2 |
| <i>circKLHL8</i> | miR-6772-3p           | 1 |
| <i>circKLHL8</i> | miR-6772-5p           | 2 |
| <i>circKLHL8</i> | miR-6776-5p           | 1 |
| <i>circKLHL8</i> | miR-6778-3p           | 1 |
| <i>circKLHL8</i> | miR-6780a-3p          | 4 |
| <i>circKLHL8</i> | miR-6783-5p           | 1 |
| <i>circKLHL8</i> | miR-6784-3p/6862-3p   | 2 |
| <i>circKLHL8</i> | miR-6784-5p           | 1 |
| <i>circKLHL8</i> | miR-6787-3p           | 2 |
| <i>circKLHL8</i> | miR-6791-3p/6829-3p   | 1 |
| <i>circKLHL8</i> | miR-6793-3p           | 1 |
| <i>circKLHL8</i> | miR-6793-5p           | 2 |
| <i>circKLHL8</i> | miR-6794-3p           | 1 |
| <i>circKLHL8</i> | miR-6796-5p           | 3 |
| <i>circKLHL8</i> | miR-6798-3p           | 1 |
| <i>circKLHL8</i> | miR-6800-5p           | 4 |
| <i>circKLHL8</i> | miR-6801-5p           | 1 |
| <i>circKLHL8</i> | miR-6802-5p           | 4 |
| <i>circKLHL8</i> | miR-6804-3p           | 2 |
| <i>circKLHL8</i> | miR-6804-5p           | 1 |
| <i>circKLHL8</i> | miR-6807-5p           | 1 |
| <i>circKLHL8</i> | miR-6808-3p           | 2 |
| <i>circKLHL8</i> | miR-6809-3p           | 2 |
| <i>circKLHL8</i> | miR-6811-3p           | 3 |
| <i>circKLHL8</i> | miR-6814-5p           | 1 |
| <i>circKLHL8</i> | miR-6815-3p           | 6 |
| <i>circKLHL8</i> | miR-6815-5p/6865-5p   | 9 |
| <i>circKLHL8</i> | miR-6817-3p           | 2 |
| <i>circKLHL8</i> | miR-6818-3p           | 1 |
| <i>circKLHL8</i> | miR-6818-5p           | 1 |
| <i>circKLHL8</i> | miR-6819-3p/6877-3p   | 3 |
| <i>circKLHL8</i> | miR-6822-3p           | 2 |
| <i>circKLHL8</i> | miR-6825-3p           | 1 |

|                  |                     |   |
|------------------|---------------------|---|
| <i>circKLHL8</i> | miR-6826-5p         | 1 |
| <i>circKLHL8</i> | miR-6827-5p         | 3 |
| <i>circKLHL8</i> | miR-6828-5p         | 1 |
| <i>circKLHL8</i> | miR-6829-5p         | 2 |
| <i>circKLHL8</i> | miR-6830-3p         | 1 |
| <i>circKLHL8</i> | miR-6830-5p         | 1 |
| <i>circKLHL8</i> | miR-6832-3p         | 2 |
| <i>circKLHL8</i> | miR-6832-5p         | 1 |
| <i>circKLHL8</i> | miR-6833-5p         | 3 |
| <i>circKLHL8</i> | miR-6834-3p         | 1 |
| <i>circKLHL8</i> | miR-6835-5p         | 1 |
| <i>circKLHL8</i> | miR-6837-3p         | 3 |
| <i>circKLHL8</i> | miR-6839-3p         | 1 |
| <i>circKLHL8</i> | miR-6840-3p         | 1 |
| <i>circKLHL8</i> | miR-6840-5p         | 3 |
| <i>circKLHL8</i> | miR-6842-3p         | 2 |
| <i>circKLHL8</i> | miR-6843-3p/6848-3p | 1 |
| <i>circKLHL8</i> | miR-6844            | 4 |
| <i>circKLHL8</i> | miR-6845-3p         | 1 |
| <i>circKLHL8</i> | miR-6846-3p         | 3 |
| <i>circKLHL8</i> | miR-6847-3p         | 1 |
| <i>circKLHL8</i> | miR-6847-5p         | 3 |
| <i>circKLHL8</i> | miR-6849-3p         | 2 |
| <i>circKLHL8</i> | miR-6852-5p         | 1 |
| <i>circKLHL8</i> | miR-6853-5p         | 1 |
| <i>circKLHL8</i> | miR-6854-3p         | 2 |
| <i>circKLHL8</i> | miR-6854-5p         | 1 |
| <i>circKLHL8</i> | miR-6856-3p         | 3 |
| <i>circKLHL8</i> | miR-6858-3p         | 1 |
| <i>circKLHL8</i> | miR-6859-3p         | 3 |
| <i>circKLHL8</i> | miR-6861-5p         | 1 |
| <i>circKLHL8</i> | miR-6864-5p         | 1 |
| <i>circKLHL8</i> | miR-6867-5p         | 1 |
| <i>circKLHL8</i> | miR-6868-3p         | 1 |
| <i>circKLHL8</i> | miR-6868-5p         | 2 |
| <i>circKLHL8</i> | miR-6869-5p         | 3 |
| <i>circKLHL8</i> | miR-6871-3p         | 3 |
| <i>circKLHL8</i> | miR-6873-3p         | 1 |

|                  |             |   |
|------------------|-------------|---|
| <i>circKLHL8</i> | miR-6874-5p | 1 |
| <i>circKLHL8</i> | miR-6875-3p | 5 |
| <i>circKLHL8</i> | miR-6880-5p | 6 |
| <i>circKLHL8</i> | miR-6881-3p | 4 |
| <i>circKLHL8</i> | miR-6882-3p | 3 |
| <i>circKLHL8</i> | miR-6882-5p | 2 |
| <i>circKLHL8</i> | miR-6883-3p | 1 |
| <i>circKLHL8</i> | miR-6884-3p | 2 |
| <i>circKLHL8</i> | miR-6886-3p | 1 |
| <i>circKLHL8</i> | miR-6886-5p | 2 |
| <i>circKLHL8</i> | miR-6888-5p | 1 |
| <i>circKLHL8</i> | miR-6890-3p | 2 |
| <i>circKLHL8</i> | miR-6890-5p | 1 |
| <i>circKLHL8</i> | miR-6892-3p | 1 |
| <i>circKLHL8</i> | miR-6894-3p | 4 |
| <i>circKLHL8</i> | miR-6894-5p | 1 |
| <i>circKLHL8</i> | miR-6895-3p | 1 |
| <i>circKLHL8</i> | miR-6895-5p | 1 |
| <i>circKLHL8</i> | miR-7-3p    | 3 |
| <i>circKLHL8</i> | miR-708-3p  | 1 |
| <i>circKLHL8</i> | miR-7106-3p | 1 |
| <i>circKLHL8</i> | miR-7108-5p | 3 |
| <i>circKLHL8</i> | miR-7109-5p | 1 |
| <i>circKLHL8</i> | miR-7110-3p | 2 |
| <i>circKLHL8</i> | miR-7111-3p | 4 |
| <i>circKLHL8</i> | miR-7112-3p | 3 |
| <i>circKLHL8</i> | miR-7114-5p | 3 |
| <i>circKLHL8</i> | miR-7150    | 6 |
| <i>circKLHL8</i> | miR-7152-3p | 1 |
| <i>circKLHL8</i> | miR-7152-5p | 3 |
| <i>circKLHL8</i> | miR-7153-3p | 3 |
| <i>circKLHL8</i> | miR-7154-3p | 1 |
| <i>circKLHL8</i> | miR-7156-3p | 2 |
| <i>circKLHL8</i> | miR-7158-3p | 3 |
| <i>circKLHL8</i> | miR-7158-5p | 1 |
| <i>circKLHL8</i> | miR-7159-3p | 2 |
| <i>circKLHL8</i> | miR-7159-5p | 1 |
| <i>circKLHL8</i> | miR-7160-3p | 1 |

|                  |                           |   |
|------------------|---------------------------|---|
| <i>circKLHL8</i> | miR-744-3p                | 2 |
| <i>circKLHL8</i> | miR-7515                  | 1 |
| <i>circKLHL8</i> | miR-758-3p                | 2 |
| <i>circKLHL8</i> | miR-758-5p                | 3 |
| <i>circKLHL8</i> | miR-760                   | 2 |
| <i>circKLHL8</i> | miR-762/4492/4498/5001-5p | 2 |
| <i>circKLHL8</i> | miR-7641                  | 2 |
| <i>circKLHL8</i> | miR-765                   | 1 |
| <i>circKLHL8</i> | miR-766-3p                | 2 |
| <i>circKLHL8</i> | miR-766-5p                | 1 |
| <i>circKLHL8</i> | miR-767-5p                | 2 |
| <i>circKLHL8</i> | miR-770-5p                | 2 |
| <i>circKLHL8</i> | miR-7705                  | 1 |
| <i>circKLHL8</i> | miR-7706                  | 2 |
| <i>circKLHL8</i> | miR-7843-3p               | 4 |
| <i>circKLHL8</i> | miR-7847-3p               | 8 |
| <i>circKLHL8</i> | miR-7848-3p               | 1 |
| <i>circKLHL8</i> | miR-7850-5p               | 1 |
| <i>circKLHL8</i> | miR-7852-3p               | 1 |
| <i>circKLHL8</i> | miR-7854-3p               | 6 |
| <i>circKLHL8</i> | miR-7855-5p               | 3 |
| <i>circKLHL8</i> | miR-7973                  | 3 |
| <i>circKLHL8</i> | miR-7974                  | 1 |
| <i>circKLHL8</i> | miR-7976                  | 1 |
| <i>circKLHL8</i> | miR-7977                  | 3 |
| <i>circKLHL8</i> | miR-7978                  | 4 |
| <i>circKLHL8</i> | miR-802                   | 2 |
| <i>circKLHL8</i> | miR-8055                  | 1 |
| <i>circKLHL8</i> | miR-8056                  | 4 |
| <i>circKLHL8</i> | miR-8057                  | 3 |
| <i>circKLHL8</i> | miR-8060                  | 3 |
| <i>circKLHL8</i> | miR-8062                  | 5 |
| <i>circKLHL8</i> | miR-8063                  | 3 |
| <i>circKLHL8</i> | miR-8065                  | 1 |
| <i>circKLHL8</i> | miR-8068                  | 1 |
| <i>circKLHL8</i> | miR-8069                  | 2 |
| <i>circKLHL8</i> | miR-8071                  | 6 |
| <i>circKLHL8</i> | miR-8075                  | 1 |

|                    |                                       |   |
|--------------------|---------------------------------------|---|
| <i>circKLHL8</i>   | miR-8076                              | 1 |
| <i>circKLHL8</i>   | miR-8081                              | 3 |
| <i>circKLHL8</i>   | miR-8084                              | 3 |
| <i>circKLHL8</i>   | miR-8087                              | 4 |
| <i>circKLHL8</i>   | miR-873-5p.2                          | 3 |
| <i>circKLHL8</i>   | miR-874-3p                            | 2 |
| <i>circKLHL8</i>   | miR-874-5p                            | 1 |
| <i>circKLHL8</i>   | miR-875-3p                            | 1 |
| <i>circKLHL8</i>   | miR-876-3p                            | 3 |
| <i>circKLHL8</i>   | miR-877-3p                            | 2 |
| <i>circKLHL8</i>   | miR-885-3p                            | 3 |
| <i>circKLHL8</i>   | miR-888-3p                            | 1 |
| <i>circKLHL8</i>   | miR-889-3p                            | 1 |
| <i>circKLHL8</i>   | miR-889-5p                            | 6 |
| <i>circKLHL8</i>   | miR-890                               | 1 |
| <i>circKLHL8</i>   | miR-891a-3p                           | 6 |
| <i>circKLHL8</i>   | miR-9-3p                              | 1 |
| <i>circKLHL8</i>   | miR-9-5p                              | 1 |
| <i>circKLHL8</i>   | miR-920/4300/5591-5p/6726-5p          | 1 |
| <i>circKLHL8</i>   | miR-921                               | 1 |
| <i>circKLHL8</i>   | miR-922                               | 1 |
| <i>circKLHL8</i>   | miR-924                               | 1 |
| <i>circKLHL8</i>   | miR-92a-1-5p                          | 3 |
| <i>circKLHL8</i>   | miR-92a-2-5p                          | 2 |
| <i>circKLHL8</i>   | miR-93-3p                             | 2 |
| <i>circKLHL8</i>   | miR-934                               | 2 |
| <i>circKLHL8</i>   | miR-936                               | 5 |
| <i>circKLHL8</i>   | miR-937-5p                            | 1 |
| <i>circKLHL8</i>   | miR-938                               | 1 |
| <i>circKLHL8</i>   | miR-939-3p                            | 1 |
| <i>circKLHL8</i>   | miR-940/6808-5p/6893-5p               | 1 |
| <i>circKLHL8</i>   | miR-942-5p                            | 2 |
| <i>circKLHL8</i>   | miR-943                               | 1 |
| <i>circKLHL8</i>   | miR-96-5p/1271-5p                     | 1 |
| <i>circKLHL8</i>   | miR-4737                              | 1 |
| <i>circL3MBTL4</i> | let-7a-2-3p/let-7g-3p                 | 3 |
| <i>circL3MBTL4</i> | let-7a-3p/let-7b-3p/let-7f-1-3p/98-3p | 3 |
| <i>circL3MBTL4</i> | let-7c-3p                             | 3 |



|                    |                     |   |
|--------------------|---------------------|---|
| <i>circL3MBTL4</i> | let-7f-2-3p/1185-3p | 3 |
| <i>circL3MBTL4</i> | miR-1-3p/206        | 3 |
| <i>circL3MBTL4</i> | miR-1-5p            | 1 |
| <i>circL3MBTL4</i> | miR-10-5p           | 1 |
| <i>circL3MBTL4</i> | miR-100-3p          | 3 |
| <i>circL3MBTL4</i> | miR-103-3p/107      | 2 |
| <i>circL3MBTL4</i> | miR-103a-2-5p       | 1 |
| <i>circL3MBTL4</i> | miR-103b            | 1 |
| <i>circL3MBTL4</i> | miR-105-3p          | 1 |
| <i>circL3MBTL4</i> | miR-10a-3p          | 1 |
| <i>circL3MBTL4</i> | miR-1178-3p         | 2 |
| <i>circL3MBTL4</i> | miR-1179            | 2 |
| <i>circL3MBTL4</i> | miR-1180-5p         | 1 |
| <i>circL3MBTL4</i> | miR-1184            | 1 |
| <i>circL3MBTL4</i> | miR-1193            | 2 |
| <i>circL3MBTL4</i> | miR-1202/3972       | 1 |
| <i>circL3MBTL4</i> | miR-1205            | 1 |
| <i>circL3MBTL4</i> | miR-1206            | 4 |
| <i>circL3MBTL4</i> | miR-1207-3p         | 1 |
| <i>circL3MBTL4</i> | miR-1208            | 1 |
| <i>circL3MBTL4</i> | miR-122-5p          | 3 |
| <i>circL3MBTL4</i> | miR-1224-3p         | 1 |
| <i>circL3MBTL4</i> | miR-1227-3p         | 1 |
| <i>circL3MBTL4</i> | miR-1229-3p         | 1 |
| <i>circL3MBTL4</i> | miR-1231            | 1 |
| <i>circL3MBTL4</i> | miR-1233-3p         | 2 |
| <i>circL3MBTL4</i> | miR-1233-5p/6778-5p | 1 |
| <i>circL3MBTL4</i> | miR-1236-3p         | 2 |
| <i>circL3MBTL4</i> | miR-1236-5p         | 1 |
| <i>circL3MBTL4</i> | miR-1238-5p/4758-5p | 1 |
| <i>circL3MBTL4</i> | miR-124-3p.1        | 3 |
| <i>circL3MBTL4</i> | miR-124-5p          | 4 |
| <i>circL3MBTL4</i> | miR-1243            | 2 |
| <i>circL3MBTL4</i> | miR-1245b-3p        | 3 |
| <i>circL3MBTL4</i> | miR-1245b-5p        | 1 |
| <i>circL3MBTL4</i> | miR-1246            | 2 |
| <i>circL3MBTL4</i> | miR-125-5p          | 2 |
| <i>circL3MBTL4</i> | miR-1250-3p         | 6 |

|                    |                          |   |
|--------------------|--------------------------|---|
| <i>circL3MBTL4</i> | miR-1250-5p              | 1 |
| <i>circL3MBTL4</i> | miR-1252-3p              | 1 |
| <i>circL3MBTL4</i> | miR-1252-5p              | 3 |
| <i>circL3MBTL4</i> | miR-1253                 | 2 |
| <i>circL3MBTL4</i> | miR-1254/3116            | 1 |
| <i>circL3MBTL4</i> | miR-1255a/1255b-5p       | 1 |
| <i>circL3MBTL4</i> | miR-1255b-2-3p           | 2 |
| <i>circL3MBTL4</i> | miR-1256                 | 1 |
| <i>circL3MBTL4</i> | miR-126-5p               | 5 |
| <i>circL3MBTL4</i> | miR-1261                 | 2 |
| <i>circL3MBTL4</i> | miR-1262/4701-3p/6736-5p | 4 |
| <i>circL3MBTL4</i> | miR-1263                 | 4 |
| <i>circL3MBTL4</i> | miR-1265                 | 1 |
| <i>circL3MBTL4</i> | miR-1266-3p              | 4 |
| <i>circL3MBTL4</i> | miR-1267                 | 1 |
| <i>circL3MBTL4</i> | miR-127-5p               | 2 |
| <i>circL3MBTL4</i> | miR-1270                 | 1 |
| <i>circL3MBTL4</i> | miR-1273a                | 1 |
| <i>circL3MBTL4</i> | miR-1273d                | 3 |
| <i>circL3MBTL4</i> | miR-1273f                | 2 |
| <i>circL3MBTL4</i> | miR-1273g-3p             | 4 |
| <i>circL3MBTL4</i> | miR-1273g-5p             | 2 |
| <i>circL3MBTL4</i> | miR-1273h-3p             | 2 |
| <i>circL3MBTL4</i> | miR-1276                 | 5 |
| <i>circL3MBTL4</i> | miR-1277-5p              | 2 |
| <i>circL3MBTL4</i> | miR-128-3p               | 2 |
| <i>circL3MBTL4</i> | miR-1282                 | 2 |
| <i>circL3MBTL4</i> | miR-1283                 | 1 |
| <i>circL3MBTL4</i> | miR-1285-5p              | 1 |
| <i>circL3MBTL4</i> | miR-1287-5p              | 2 |
| <i>circL3MBTL4</i> | miR-1288-3p              | 1 |
| <i>circL3MBTL4</i> | miR-1289                 | 1 |
| <i>circL3MBTL4</i> | miR-129-3p               | 2 |
| <i>circL3MBTL4</i> | miR-129-5p               | 2 |
| <i>circL3MBTL4</i> | miR-1293/4483            | 4 |
| <i>circL3MBTL4</i> | miR-1295a                | 1 |
| <i>circL3MBTL4</i> | miR-1295b-3p             | 2 |
| <i>circL3MBTL4</i> | miR-1296-3p              | 1 |

|                    |                          |   |
|--------------------|--------------------------|---|
| <i>circL3MBTL4</i> | miR-130-3p/301-3p/454-3p | 1 |
| <i>circL3MBTL4</i> | miR-1301-3p              | 1 |
| <i>circL3MBTL4</i> | miR-1302/4298            | 3 |
| <i>circL3MBTL4</i> | miR-1304-3p              | 1 |
| <i>circL3MBTL4</i> | miR-1305                 | 1 |
| <i>circL3MBTL4</i> | miR-1306-5p              | 1 |
| <i>circL3MBTL4</i> | miR-130b-5p              | 1 |
| <i>circL3MBTL4</i> | miR-132-3p/212-3p        | 1 |
| <i>circL3MBTL4</i> | miR-132-5p               | 3 |
| <i>circL3MBTL4</i> | miR-1323                 | 1 |
| <i>circL3MBTL4</i> | miR-1324                 | 3 |
| <i>circL3MBTL4</i> | miR-133a-3p.1            | 1 |
| <i>circL3MBTL4</i> | miR-133a-3p.2/133b       | 1 |
| <i>circL3MBTL4</i> | miR-133a-5p              | 1 |
| <i>circL3MBTL4</i> | miR-134-5p               | 1 |
| <i>circL3MBTL4</i> | miR-1343-3p              | 2 |
| <i>circL3MBTL4</i> | miR-136-5p               | 1 |
| <i>circL3MBTL4</i> | miR-138-1-3p             | 1 |
| <i>circL3MBTL4</i> | miR-138-5p               | 1 |
| <i>circL3MBTL4</i> | miR-139-3p               | 1 |
| <i>circL3MBTL4</i> | miR-139-5p               | 2 |
| <i>circL3MBTL4</i> | miR-140-3p.1             | 2 |
| <i>circL3MBTL4</i> | miR-140-3p.2             | 3 |
| <i>circL3MBTL4</i> | miR-140-5p               | 2 |
| <i>circL3MBTL4</i> | miR-141-3p/200-3p        | 1 |
| <i>circL3MBTL4</i> | miR-142-5p               | 1 |
| <i>circL3MBTL4</i> | miR-143-3p               | 2 |
| <i>circL3MBTL4</i> | miR-143-5p               | 2 |
| <i>circL3MBTL4</i> | miR-144-5p               | 1 |
| <i>circL3MBTL4</i> | miR-145-3p               | 4 |
| <i>circL3MBTL4</i> | miR-145-5p               | 1 |
| <i>circL3MBTL4</i> | miR-146-5p               | 2 |
| <i>circL3MBTL4</i> | miR-1468-3p              | 7 |
| <i>circL3MBTL4</i> | miR-146b-3p              | 2 |
| <i>circL3MBTL4</i> | miR-147a                 | 3 |
| <i>circL3MBTL4</i> | miR-148b-5p/6874-3p      | 1 |
| <i>circL3MBTL4</i> | miR-149-5p               | 1 |
| <i>circL3MBTL4</i> | miR-150-3p               | 4 |

|                    |                                     |    |
|--------------------|-------------------------------------|----|
| <i>circL3MBTL4</i> | miR-150-5p                          | 1  |
| <i>circL3MBTL4</i> | miR-151-5p                          | 1  |
| <i>circL3MBTL4</i> | miR-153-5p                          | 5  |
| <i>circL3MBTL4</i> | miR-154-5p                          | 2  |
| <i>circL3MBTL4</i> | miR-155-3p                          | 2  |
| <i>circL3MBTL4</i> | miR-15a-3p                          | 2  |
| <i>circL3MBTL4</i> | miR-15b-3p                          | 2  |
| <i>circL3MBTL4</i> | miR-16-2-3p/195-3p                  | 1  |
| <i>circL3MBTL4</i> | miR-17-3p                           | 1  |
| <i>circL3MBTL4</i> | miR-17-5p/20-5p/93-5p/106-5p/519-3p | 1  |
| <i>circL3MBTL4</i> | miR-18-5p                           | 3  |
| <i>circL3MBTL4</i> | miR-181-3p/4420                     | 1  |
| <i>circL3MBTL4</i> | miR-181-5p                          | 3  |
| <i>circL3MBTL4</i> | miR-181a-3p                         | 1  |
| <i>circL3MBTL4</i> | miR-182-3p                          | 3  |
| <i>circL3MBTL4</i> | miR-1827                            | 2  |
| <i>circL3MBTL4</i> | miR-183-3p                          | 3  |
| <i>circL3MBTL4</i> | miR-184                             | 1  |
| <i>circL3MBTL4</i> | miR-186-3p                          | 2  |
| <i>circL3MBTL4</i> | miR-186-5p                          | 14 |
| <i>circL3MBTL4</i> | miR-187-5p                          | 1  |
| <i>circL3MBTL4</i> | miR-188-5p                          | 1  |
| <i>circL3MBTL4</i> | miR-18a-3p                          | 3  |
| <i>circL3MBTL4</i> | miR-19-5p                           | 1  |
| <i>circL3MBTL4</i> | miR-1908-5p                         | 1  |
| <i>circL3MBTL4</i> | miR-1909-5p                         | 2  |
| <i>circL3MBTL4</i> | miR-191-5p                          | 1  |
| <i>circL3MBTL4</i> | miR-1910-3p/6511a-5p                | 2  |
| <i>circL3MBTL4</i> | miR-1910-5p                         | 5  |
| <i>circL3MBTL4</i> | miR-1915-3p/6764-5p                 | 2  |
| <i>circL3MBTL4</i> | miR-192-3p                          | 5  |
| <i>circL3MBTL4</i> | miR-192-5p/215-5p                   | 2  |
| <i>circL3MBTL4</i> | miR-193-3p                          | 1  |
| <i>circL3MBTL4</i> | miR-196a-3p                         | 1  |
| <i>circL3MBTL4</i> | miR-196b-3p                         | 1  |
| <i>circL3MBTL4</i> | miR-197-3p                          | 1  |
| <i>circL3MBTL4</i> | miR-1976                            | 1  |
| <i>circL3MBTL4</i> | miR-198                             | 1  |

|                    |                     |   |
|--------------------|---------------------|---|
| <i>circL3MBTL4</i> | miR-199-3p          | 2 |
| <i>circL3MBTL4</i> | miR-200ab-5p        | 1 |
| <i>circL3MBTL4</i> | miR-200c-5p/550a-3p | 1 |
| <i>circL3MBTL4</i> | miR-202-5p          | 1 |
| <i>circL3MBTL4</i> | miR-203a-3p.1       | 2 |
| <i>circL3MBTL4</i> | miR-203a-5p         | 2 |
| <i>circL3MBTL4</i> | miR-203b-3p         | 4 |
| <i>circL3MBTL4</i> | miR-203b-5p/6718-5p | 1 |
| <i>circL3MBTL4</i> | miR-204-3p/4646-5p  | 4 |
| <i>circL3MBTL4</i> | miR-204-5p/211-5p   | 1 |
| <i>circL3MBTL4</i> | miR-205-3p          | 2 |
| <i>circL3MBTL4</i> | miR-205-5p          | 1 |
| <i>circL3MBTL4</i> | miR-2052            | 1 |
| <i>circL3MBTL4</i> | miR-2053            | 1 |
| <i>circL3MBTL4</i> | miR-208-3p          | 5 |
| <i>circL3MBTL4</i> | miR-208-5p          | 2 |
| <i>circL3MBTL4</i> | miR-20b-3p          | 2 |
| <i>circL3MBTL4</i> | miR-21-5p/590-5p    | 1 |
| <i>circL3MBTL4</i> | miR-211-3p          | 2 |
| <i>circL3MBTL4</i> | miR-2110            | 1 |
| <i>circL3MBTL4</i> | miR-2113            | 2 |
| <i>circL3MBTL4</i> | miR-2114-5p         | 1 |
| <i>circL3MBTL4</i> | miR-2115-3p         | 3 |
| <i>circL3MBTL4</i> | miR-2116-3p         | 1 |
| <i>circL3MBTL4</i> | miR-212-5p          | 5 |
| <i>circL3MBTL4</i> | miR-214-3p/3619-5p  | 2 |
| <i>circL3MBTL4</i> | miR-216a-5p         | 1 |
| <i>circL3MBTL4</i> | miR-216b-3p         | 1 |
| <i>circL3MBTL4</i> | miR-216b-5p         | 1 |
| <i>circL3MBTL4</i> | miR-217             | 2 |
| <i>circL3MBTL4</i> | miR-218-1-3p        | 3 |
| <i>circL3MBTL4</i> | miR-218-2-3p        | 3 |
| <i>circL3MBTL4</i> | miR-218-5p          | 2 |
| <i>circL3MBTL4</i> | miR-219-5p          | 1 |
| <i>circL3MBTL4</i> | miR-219a-1-3p       | 1 |
| <i>circL3MBTL4</i> | miR-219a-2-3p       | 1 |
| <i>circL3MBTL4</i> | miR-219b-3p         | 1 |
| <i>circL3MBTL4</i> | miR-219b-5p         | 1 |

|                    |                                              |   |
|--------------------|----------------------------------------------|---|
| <i>circL3MBTL4</i> | miR-22-3p                                    | 1 |
| <i>circL3MBTL4</i> | miR-221-3p/222-3p                            | 1 |
| <i>circL3MBTL4</i> | miR-221-5p/8073                              | 1 |
| <i>circL3MBTL4</i> | miR-222-5p                                   | 2 |
| <i>circL3MBTL4</i> | miR-223-3p                                   | 1 |
| <i>circL3MBTL4</i> | miR-224-5p                                   | 3 |
| <i>circL3MBTL4</i> | miR-2276-3p                                  | 2 |
| <i>circL3MBTL4</i> | miR-2277-3p                                  | 1 |
| <i>circL3MBTL4</i> | miR-2278                                     | 2 |
| <i>circL3MBTL4</i> | miR-23-3p                                    | 1 |
| <i>circL3MBTL4</i> | miR-23-5p                                    | 1 |
| <i>circL3MBTL4</i> | miR-2355-5p                                  | 1 |
| <i>circL3MBTL4</i> | miR-2392                                     | 1 |
| <i>circL3MBTL4</i> | miR-2467-3p                                  | 1 |
| <i>circL3MBTL4</i> | miR-25-3p/32-5p/92-3p/363-3p/367-3p          | 2 |
| <i>circL3MBTL4</i> | miR-26-3p                                    | 2 |
| <i>circL3MBTL4</i> | miR-2682-3p/6781-3p                          | 1 |
| <i>circL3MBTL4</i> | miR-26b-3p                                   | 1 |
| <i>circL3MBTL4</i> | miR-27-3p                                    | 4 |
| <i>circL3MBTL4</i> | miR-27a-5p                                   | 1 |
| <i>circL3MBTL4</i> | miR-28-3p                                    | 2 |
| <i>circL3MBTL4</i> | miR-28-5p/708-5p                             | 2 |
| <i>circL3MBTL4</i> | miR-29-3p                                    | 2 |
| <i>circL3MBTL4</i> | miR-297                                      | 1 |
| <i>circL3MBTL4</i> | miR-298                                      | 1 |
| <i>circL3MBTL4</i> | miR-29a-5p                                   | 1 |
| <i>circL3MBTL4</i> | miR-29b-2-5p                                 | 3 |
| <i>circL3MBTL4</i> | miR-30-3p                                    | 5 |
| <i>circL3MBTL4</i> | miR-301a-5p/301b-5p                          | 1 |
| <i>circL3MBTL4</i> | miR-302-3p/372-3p/373-3p/520-3p              | 1 |
| <i>circL3MBTL4</i> | miR-302f                                     | 1 |
| <i>circL3MBTL4</i> | miR-3064-5p                                  | 1 |
| <i>circL3MBTL4</i> | miR-3065-3p                                  | 2 |
| <i>circL3MBTL4</i> | miR-3065-5p                                  | 1 |
| <i>circL3MBTL4</i> | miR-3074-3p                                  | 1 |
| <i>circL3MBTL4</i> | miR-3074-5p                                  | 4 |
| <i>circL3MBTL4</i> | miR-30b-3p/1273h-5p/3689-3p/6779-5p/6780a-5p | 2 |
| <i>circL3MBTL4</i> | miR-30c-3p/6788-5p                           | 2 |

|                    |                          |    |
|--------------------|--------------------------|----|
| <i>circL3MBTL4</i> | miR-31-3p                | 3  |
| <i>circL3MBTL4</i> | miR-3117-5p              | 1  |
| <i>circL3MBTL4</i> | miR-3120-3p              | 5  |
| <i>circL3MBTL4</i> | miR-3120-5p              | 2  |
| <i>circL3MBTL4</i> | miR-3121-3p              | 2  |
| <i>circL3MBTL4</i> | miR-3121-5p              | 2  |
| <i>circL3MBTL4</i> | miR-3122/3913-5p         | 2  |
| <i>circL3MBTL4</i> | miR-3123                 | 5  |
| <i>circL3MBTL4</i> | miR-3124-3p              | 4  |
| <i>circL3MBTL4</i> | miR-3125/3916/6859-5p    | 1  |
| <i>circL3MBTL4</i> | miR-3127-3p/6756-3p      | 2  |
| <i>circL3MBTL4</i> | miR-3128                 | 1  |
| <i>circL3MBTL4</i> | miR-3129-3p/5583-5p      | 3  |
| <i>circL3MBTL4</i> | miR-3130-3p              | 5  |
| <i>circL3MBTL4</i> | miR-3133                 | 14 |
| <i>circL3MBTL4</i> | miR-3134                 | 3  |
| <i>circL3MBTL4</i> | miR-3135b                | 2  |
| <i>circL3MBTL4</i> | miR-3137                 | 2  |
| <i>circL3MBTL4</i> | miR-3138                 | 2  |
| <i>circL3MBTL4</i> | miR-3140-3p              | 2  |
| <i>circL3MBTL4</i> | miR-3140-5p              | 1  |
| <i>circL3MBTL4</i> | miR-3145-3p              | 2  |
| <i>circL3MBTL4</i> | miR-3146                 | 1  |
| <i>circL3MBTL4</i> | miR-3147                 | 1  |
| <i>circL3MBTL4</i> | miR-3148                 | 6  |
| <i>circL3MBTL4</i> | miR-3149                 | 1  |
| <i>circL3MBTL4</i> | miR-3150a-3p             | 1  |
| <i>circL3MBTL4</i> | miR-3152-5p              | 2  |
| <i>circL3MBTL4</i> | miR-3153/6733-5p/6739-5p | 2  |
| <i>circL3MBTL4</i> | miR-3154                 | 5  |
| <i>circL3MBTL4</i> | miR-3156-5p              | 5  |
| <i>circL3MBTL4</i> | miR-3157-3p              | 1  |
| <i>circL3MBTL4</i> | miR-3157-5p              | 2  |
| <i>circL3MBTL4</i> | miR-3158-3p              | 1  |
| <i>circL3MBTL4</i> | miR-3158-5p              | 1  |
| <i>circL3MBTL4</i> | miR-3160-3p              | 1  |
| <i>circL3MBTL4</i> | miR-3160-5p              | 2  |
| <i>circL3MBTL4</i> | miR-3161                 | 1  |

|                    |                           |   |
|--------------------|---------------------------|---|
| <i>circL3MBTL4</i> | miR-3162-3p               | 1 |
| <i>circL3MBTL4</i> | miR-3163                  | 3 |
| <i>circL3MBTL4</i> | miR-3164                  | 1 |
| <i>circL3MBTL4</i> | miR-3165                  | 1 |
| <i>circL3MBTL4</i> | miR-3166                  | 1 |
| <i>circL3MBTL4</i> | miR-3168                  | 1 |
| <i>circL3MBTL4</i> | miR-3169                  | 1 |
| <i>circL3MBTL4</i> | miR-3173-3p/6891-5p       | 9 |
| <i>circL3MBTL4</i> | miR-3173-5p               | 2 |
| <i>circL3MBTL4</i> | miR-3176/3922-3p          | 1 |
| <i>circL3MBTL4</i> | miR-3177-5p               | 1 |
| <i>circL3MBTL4</i> | miR-3180-5p               | 4 |
| <i>circL3MBTL4</i> | miR-3182                  | 2 |
| <i>circL3MBTL4</i> | miR-3185                  | 7 |
| <i>circL3MBTL4</i> | miR-3187-3p               | 2 |
| <i>circL3MBTL4</i> | miR-3189-3p               | 5 |
| <i>circL3MBTL4</i> | miR-3190-5p               | 1 |
| <i>circL3MBTL4</i> | miR-3192-3p               | 1 |
| <i>circL3MBTL4</i> | miR-3192-5p               | 4 |
| <i>circL3MBTL4</i> | miR-3193                  | 3 |
| <i>circL3MBTL4</i> | miR-3194-5p               | 1 |
| <i>circL3MBTL4</i> | miR-3198/4309             | 1 |
| <i>circL3MBTL4</i> | miR-3199/8052             | 1 |
| <i>circL3MBTL4</i> | miR-32-3p                 | 1 |
| <i>circL3MBTL4</i> | miR-320                   | 2 |
| <i>circL3MBTL4</i> | miR-3200-3p               | 1 |
| <i>circL3MBTL4</i> | miR-3200-5p               | 1 |
| <i>circL3MBTL4</i> | miR-320e                  | 7 |
| <i>circL3MBTL4</i> | miR-323-3p                | 1 |
| <i>circL3MBTL4</i> | miR-323b-3p               | 1 |
| <i>circL3MBTL4</i> | miR-323b-5p/410-5p/494-5p | 1 |
| <i>circL3MBTL4</i> | miR-324-3p/1913           | 3 |
| <i>circL3MBTL4</i> | miR-324-5p                | 2 |
| <i>circL3MBTL4</i> | miR-329-3p/362-3p         | 1 |
| <i>circL3MBTL4</i> | miR-33-5p                 | 1 |
| <i>circL3MBTL4</i> | miR-330-3p                | 3 |
| <i>circL3MBTL4</i> | miR-330-3p.2              | 5 |
| <i>circL3MBTL4</i> | miR-331-3p                | 1 |



|                    |                           |   |
|--------------------|---------------------------|---|
| <i>circL3MBTL4</i> | miR-335-3p                | 5 |
| <i>circL3MBTL4</i> | miR-337-3p                | 1 |
| <i>circL3MBTL4</i> | miR-338-3p                | 1 |
| <i>circL3MBTL4</i> | miR-338-5p                | 1 |
| <i>circL3MBTL4</i> | miR-33a-3p                | 4 |
| <i>circL3MBTL4</i> | miR-33b-3p/515-3p/519e-3p | 1 |
| <i>circL3MBTL4</i> | miR-340-3p/6827-3p        | 2 |
| <i>circL3MBTL4</i> | miR-340-5p                | 2 |
| <i>circL3MBTL4</i> | miR-342-3p                | 1 |
| <i>circL3MBTL4</i> | miR-342-5p/4664-5p        | 2 |
| <i>circL3MBTL4</i> | miR-345-3p                | 1 |
| <i>circL3MBTL4</i> | miR-345-5p                | 1 |
| <i>circL3MBTL4</i> | miR-34b-3p                | 1 |
| <i>circL3MBTL4</i> | miR-34b-5p/449c-5p        | 2 |
| <i>circL3MBTL4</i> | miR-34c-3p                | 1 |
| <i>circL3MBTL4</i> | miR-3529-3p               | 1 |
| <i>circL3MBTL4</i> | miR-3606-5p               | 1 |
| <i>circL3MBTL4</i> | miR-3607-3p               | 1 |
| <i>circL3MBTL4</i> | miR-3607-5p               | 1 |
| <i>circL3MBTL4</i> | miR-3611                  | 1 |
| <i>circL3MBTL4</i> | miR-3612                  | 4 |
| <i>circL3MBTL4</i> | miR-3613-3p               | 9 |
| <i>circL3MBTL4</i> | miR-3619-3p               | 2 |
| <i>circL3MBTL4</i> | miR-362-5p/500b-5p        | 2 |
| <i>circL3MBTL4</i> | miR-3620-3p               | 2 |
| <i>circL3MBTL4</i> | miR-3621                  | 1 |
| <i>circL3MBTL4</i> | miR-3622a-3p/3622b-3p     | 1 |
| <i>circL3MBTL4</i> | miR-3622a-5p              | 2 |
| <i>circL3MBTL4</i> | miR-363-5p/6745           | 4 |
| <i>circL3MBTL4</i> | miR-3646                  | 1 |
| <i>circL3MBTL4</i> | miR-3649                  | 1 |
| <i>circL3MBTL4</i> | miR-3650                  | 3 |
| <i>circL3MBTL4</i> | miR-3651                  | 1 |
| <i>circL3MBTL4</i> | miR-3653-3p               | 1 |
| <i>circL3MBTL4</i> | miR-3653-5p               | 1 |
| <i>circL3MBTL4</i> | miR-3654                  | 2 |
| <i>circL3MBTL4</i> | miR-3656                  | 1 |
| <i>circL3MBTL4</i> | miR-3657                  | 1 |

|                    |                           |   |
|--------------------|---------------------------|---|
| <i>circL3MBTL4</i> | miR-3658                  | 2 |
| <i>circL3MBTL4</i> | miR-365a-5p/365b-5p       | 1 |
| <i>circL3MBTL4</i> | miR-3660/4526             | 2 |
| <i>circL3MBTL4</i> | miR-3662                  | 6 |
| <i>circL3MBTL4</i> | miR-3663-5p               | 1 |
| <i>circL3MBTL4</i> | miR-3664-5p               | 1 |
| <i>circL3MBTL4</i> | miR-3665                  | 1 |
| <i>circL3MBTL4</i> | miR-3667-3p               | 4 |
| <i>circL3MBTL4</i> | miR-3667-5p               | 4 |
| <i>circL3MBTL4</i> | miR-367-5p                | 1 |
| <i>circL3MBTL4</i> | miR-3672/6864-3p          | 1 |
| <i>circL3MBTL4</i> | miR-3674                  | 1 |
| <i>circL3MBTL4</i> | miR-3675-3p               | 1 |
| <i>circL3MBTL4</i> | miR-3675-5p               | 1 |
| <i>circL3MBTL4</i> | miR-3677-5p               | 1 |
| <i>circL3MBTL4</i> | miR-3678-3p               | 2 |
| <i>circL3MBTL4</i> | miR-3679-3p               | 1 |
| <i>circL3MBTL4</i> | miR-3680-3p               | 1 |
| <i>circL3MBTL4</i> | miR-3680-5p               | 1 |
| <i>circL3MBTL4</i> | miR-3682-3p               | 1 |
| <i>circL3MBTL4</i> | miR-3684                  | 1 |
| <i>circL3MBTL4</i> | miR-3685                  | 1 |
| <i>circL3MBTL4</i> | miR-3686                  | 2 |
| <i>circL3MBTL4</i> | miR-3688-3p               | 4 |
| <i>circL3MBTL4</i> | miR-3688-5p               | 2 |
| <i>circL3MBTL4</i> | miR-369-5p                | 1 |
| <i>circL3MBTL4</i> | miR-3690                  | 2 |
| <i>circL3MBTL4</i> | miR-3691-5p               | 1 |
| <i>circL3MBTL4</i> | miR-370-3p                | 1 |
| <i>circL3MBTL4</i> | miR-371-5p                | 4 |
| <i>circL3MBTL4</i> | miR-3714                  | 3 |
| <i>circL3MBTL4</i> | miR-371a-3p               | 1 |
| <i>circL3MBTL4</i> | miR-371b-3p               | 1 |
| <i>circL3MBTL4</i> | miR-371b-5p/373-5p/616-5p | 4 |
| <i>circL3MBTL4</i> | miR-372-5p                | 4 |
| <i>circL3MBTL4</i> | miR-374-5p                | 2 |
| <i>circL3MBTL4</i> | miR-375                   | 1 |
| <i>circL3MBTL4</i> | miR-376a-2-5p             | 2 |

|                    |                     |   |
|--------------------|---------------------|---|
| <i>circL3MBTL4</i> | miR-376a-5p         | 2 |
| <i>circL3MBTL4</i> | miR-376b-5p/376c-5p | 2 |
| <i>circL3MBTL4</i> | miR-376c-3p         | 1 |
| <i>circL3MBTL4</i> | miR-377-3p          | 1 |
| <i>circL3MBTL4</i> | miR-378-3p          | 1 |
| <i>circL3MBTL4</i> | miR-381-3p          | 3 |
| <i>circL3MBTL4</i> | miR-382-3p          | 1 |
| <i>circL3MBTL4</i> | miR-382-5p          | 2 |
| <i>circL3MBTL4</i> | miR-383-3p          | 2 |
| <i>circL3MBTL4</i> | miR-383-5p.1        | 3 |
| <i>circL3MBTL4</i> | miR-383-5p.2        | 1 |
| <i>circL3MBTL4</i> | miR-384             | 1 |
| <i>circL3MBTL4</i> | miR-3907            | 1 |
| <i>circL3MBTL4</i> | miR-3908            | 4 |
| <i>circL3MBTL4</i> | miR-3909            | 1 |
| <i>circL3MBTL4</i> | miR-3910            | 3 |
| <i>circL3MBTL4</i> | miR-3911            | 1 |
| <i>circL3MBTL4</i> | miR-3912-5p         | 1 |
| <i>circL3MBTL4</i> | miR-3913-3p         | 2 |
| <i>circL3MBTL4</i> | miR-3914            | 4 |
| <i>circL3MBTL4</i> | miR-3918            | 1 |
| <i>circL3MBTL4</i> | miR-3919            | 4 |
| <i>circL3MBTL4</i> | miR-3921/4653-5p    | 1 |
| <i>circL3MBTL4</i> | miR-3922-5p         | 2 |
| <i>circL3MBTL4</i> | miR-3923            | 1 |
| <i>circL3MBTL4</i> | miR-3925-3p         | 1 |
| <i>circL3MBTL4</i> | miR-3925-5p         | 5 |
| <i>circL3MBTL4</i> | miR-3926            | 3 |
| <i>circL3MBTL4</i> | miR-3927-5p         | 1 |
| <i>circL3MBTL4</i> | miR-3928-3p         | 2 |
| <i>circL3MBTL4</i> | miR-3928-5p/6806-3p | 4 |
| <i>circL3MBTL4</i> | miR-3929/4419b/4478 | 2 |
| <i>circL3MBTL4</i> | miR-3935            | 1 |
| <i>circL3MBTL4</i> | miR-3940-5p/4507    | 1 |
| <i>circL3MBTL4</i> | miR-3942-3p         | 5 |
| <i>circL3MBTL4</i> | miR-3942-5p         | 4 |
| <i>circL3MBTL4</i> | miR-3945            | 1 |
| <i>circL3MBTL4</i> | miR-3973            | 2 |

|                    |                           |   |
|--------------------|---------------------------|---|
| <i>circL3MBTL4</i> | miR-3978                  | 3 |
| <i>circL3MBTL4</i> | miR-409-3p                | 3 |
| <i>circL3MBTL4</i> | miR-409-5p                | 2 |
| <i>circL3MBTL4</i> | miR-410-3p                | 2 |
| <i>circL3MBTL4</i> | miR-412-3p/6754-3p        | 2 |
| <i>circL3MBTL4</i> | miR-421                   | 2 |
| <i>circL3MBTL4</i> | miR-425-3p                | 1 |
| <i>circL3MBTL4</i> | miR-425-5p                | 1 |
| <i>circL3MBTL4</i> | miR-4251                  | 3 |
| <i>circL3MBTL4</i> | miR-4252                  | 1 |
| <i>circL3MBTL4</i> | miR-4253/6862-5p          | 1 |
| <i>circL3MBTL4</i> | miR-4254                  | 2 |
| <i>circL3MBTL4</i> | miR-4255                  | 1 |
| <i>circL3MBTL4</i> | miR-4256                  | 1 |
| <i>circL3MBTL4</i> | miR-4259                  | 1 |
| <i>circL3MBTL4</i> | miR-4261                  | 2 |
| <i>circL3MBTL4</i> | miR-4263                  | 1 |
| <i>circL3MBTL4</i> | miR-4266                  | 1 |
| <i>circL3MBTL4</i> | miR-4267                  | 1 |
| <i>circL3MBTL4</i> | miR-4268                  | 2 |
| <i>circL3MBTL4</i> | miR-4269/6715b-5p         | 2 |
| <i>circL3MBTL4</i> | miR-4270/4441/6754-5p     | 1 |
| <i>circL3MBTL4</i> | miR-4271/4725-3p/6780b-5p | 1 |
| <i>circL3MBTL4</i> | miR-4272                  | 3 |
| <i>circL3MBTL4</i> | miR-4273/7156-5p          | 1 |
| <i>circL3MBTL4</i> | miR-4275                  | 3 |
| <i>circL3MBTL4</i> | miR-4276                  | 1 |
| <i>circL3MBTL4</i> | miR-4277                  | 2 |
| <i>circL3MBTL4</i> | miR-4279                  | 1 |
| <i>circL3MBTL4</i> | miR-4280                  | 1 |
| <i>circL3MBTL4</i> | miR-4282                  | 3 |
| <i>circL3MBTL4</i> | miR-4287/4685-3p          | 1 |
| <i>circL3MBTL4</i> | miR-4289                  | 3 |
| <i>circL3MBTL4</i> | miR-4291                  | 1 |
| <i>circL3MBTL4</i> | miR-4292/6791-5p          | 2 |
| <i>circL3MBTL4</i> | miR-4293                  | 1 |
| <i>circL3MBTL4</i> | miR-4294                  | 1 |
| <i>circL3MBTL4</i> | miR-4297/5581-5p          | 1 |

|                    |                                              |   |
|--------------------|----------------------------------------------|---|
| <i>circL3MBTL4</i> | miR-4301                                     | 1 |
| <i>circL3MBTL4</i> | miR-4302                                     | 1 |
| <i>circL3MBTL4</i> | miR-4303                                     | 1 |
| <i>circL3MBTL4</i> | miR-4305                                     | 1 |
| <i>circL3MBTL4</i> | miR-4308                                     | 2 |
| <i>circL3MBTL4</i> | miR-431-5p                                   | 2 |
| <i>circL3MBTL4</i> | miR-4310/7157-5p                             | 3 |
| <i>circL3MBTL4</i> | miR-4311                                     | 5 |
| <i>circL3MBTL4</i> | miR-4312                                     | 2 |
| <i>circL3MBTL4</i> | miR-4313                                     | 1 |
| <i>circL3MBTL4</i> | miR-4317                                     | 1 |
| <i>circL3MBTL4</i> | miR-432-3p                                   | 1 |
| <i>circL3MBTL4</i> | miR-432-5p                                   | 2 |
| <i>circL3MBTL4</i> | miR-4320                                     | 1 |
| <i>circL3MBTL4</i> | miR-4321                                     | 1 |
| <i>circL3MBTL4</i> | miR-4325                                     | 1 |
| <i>circL3MBTL4</i> | miR-4326                                     | 3 |
| <i>circL3MBTL4</i> | miR-4329                                     | 3 |
| <i>circL3MBTL4</i> | miR-4421/5699-3p                             | 1 |
| <i>circL3MBTL4</i> | miR-4422                                     | 5 |
| <i>circL3MBTL4</i> | miR-4423-3p                                  | 1 |
| <i>circL3MBTL4</i> | miR-4423-5p                                  | 1 |
| <i>circL3MBTL4</i> | miR-4425                                     | 1 |
| <i>circL3MBTL4</i> | miR-4426/4647/4662b                          | 2 |
| <i>circL3MBTL4</i> | miR-4428                                     | 9 |
| <i>circL3MBTL4</i> | miR-4432                                     | 2 |
| <i>circL3MBTL4</i> | miR-4433a-3p                                 | 1 |
| <i>circL3MBTL4</i> | miR-4433a-5p                                 | 1 |
| <i>circL3MBTL4</i> | miR-4433b-3p                                 | 2 |
| <i>circL3MBTL4</i> | miR-4433b-5p                                 | 1 |
| <i>circL3MBTL4</i> | miR-4434/4516/5703                           | 6 |
| <i>circL3MBTL4</i> | miR-4435                                     | 2 |
| <i>circL3MBTL4</i> | miR-4436b-3p/4632-5p/6735-5p/6879-5p/7843-5p |   |
| <i>circL3MBTL4</i> | miR-4436b-5p                                 | 1 |
| <i>circL3MBTL4</i> | miR-4438                                     | 1 |
| <i>circL3MBTL4</i> | miR-4443                                     | 3 |
| <i>circL3MBTL4</i> | miR-4445-5p                                  | 1 |
| <i>circL3MBTL4</i> | miR-4446-3p                                  | 1 |

|                    |                    |   |
|--------------------|--------------------|---|
| <i>circL3MBTL4</i> | miR-4448           | 2 |
| <i>circL3MBTL4</i> | miR-4452           | 3 |
| <i>circL3MBTL4</i> | miR-4455           | 1 |
| <i>circL3MBTL4</i> | miR-4457           | 2 |
| <i>circL3MBTL4</i> | miR-4459           | 1 |
| <i>circL3MBTL4</i> | miR-4464/4748      | 1 |
| <i>circL3MBTL4</i> | miR-4468           | 1 |
| <i>circL3MBTL4</i> | miR-4469           | 1 |
| <i>circL3MBTL4</i> | miR-4470           | 4 |
| <i>circL3MBTL4</i> | miR-4473           | 1 |
| <i>circL3MBTL4</i> | miR-4474-3p        | 2 |
| <i>circL3MBTL4</i> | miR-4474-5p        | 1 |
| <i>circL3MBTL4</i> | miR-4475           | 1 |
| <i>circL3MBTL4</i> | miR-4476/6876-5p   | 4 |
| <i>circL3MBTL4</i> | miR-4477a          | 1 |
| <i>circL3MBTL4</i> | miR-4477b          | 1 |
| <i>circL3MBTL4</i> | miR-4480           | 2 |
| <i>circL3MBTL4</i> | miR-4481/4745-5p   | 2 |
| <i>circL3MBTL4</i> | miR-4482-3p        | 3 |
| <i>circL3MBTL4</i> | miR-4484           | 3 |
| <i>circL3MBTL4</i> | miR-4487           | 1 |
| <i>circL3MBTL4</i> | miR-4490           | 1 |
| <i>circL3MBTL4</i> | miR-4493           | 3 |
| <i>circL3MBTL4</i> | miR-4494           | 3 |
| <i>circL3MBTL4</i> | miR-4495           | 1 |
| <i>circL3MBTL4</i> | miR-4496           | 4 |
| <i>circL3MBTL4</i> | miR-449c-3p        | 1 |
| <i>circL3MBTL4</i> | miR-4501           | 1 |
| <i>circL3MBTL4</i> | miR-4503           | 1 |
| <i>circL3MBTL4</i> | miR-4504           | 1 |
| <i>circL3MBTL4</i> | miR-4506           | 6 |
| <i>circL3MBTL4</i> | miR-4509           | 4 |
| <i>circL3MBTL4</i> | miR-450a-1-3p      | 2 |
| <i>circL3MBTL4</i> | miR-450b-3p/769-3p | 2 |
| <i>circL3MBTL4</i> | miR-450b-5p        | 1 |
| <i>circL3MBTL4</i> | miR-4511           | 5 |
| <i>circL3MBTL4</i> | miR-4513/6855-3p   | 1 |
| <i>circL3MBTL4</i> | miR-4514/4692      | 2 |

|                    |                       |   |
|--------------------|-----------------------|---|
| <i>circL3MBTL4</i> | miR-4515              | 1 |
| <i>circL3MBTL4</i> | miR-4517              | 2 |
| <i>circL3MBTL4</i> | miR-451b              | 1 |
| <i>circL3MBTL4</i> | miR-4520-2-3p         | 1 |
| <i>circL3MBTL4</i> | miR-4520-3p           | 3 |
| <i>circL3MBTL4</i> | miR-4521              | 1 |
| <i>circL3MBTL4</i> | miR-4522              | 1 |
| <i>circL3MBTL4</i> | miR-4524-5p           | 1 |
| <i>circL3MBTL4</i> | miR-4524a-3p          | 2 |
| <i>circL3MBTL4</i> | miR-4524b-3p          | 1 |
| <i>circL3MBTL4</i> | miR-4527/6503-5p      | 1 |
| <i>circL3MBTL4</i> | miR-4528              | 1 |
| <i>circL3MBTL4</i> | miR-4529-3p           | 1 |
| <i>circL3MBTL4</i> | miR-4529-5p           | 2 |
| <i>circL3MBTL4</i> | miR-4530              | 1 |
| <i>circL3MBTL4</i> | miR-4531              | 1 |
| <i>circL3MBTL4</i> | miR-4532              | 1 |
| <i>circL3MBTL4</i> | miR-4534/8082         | 3 |
| <i>circL3MBTL4</i> | miR-4535              | 1 |
| <i>circL3MBTL4</i> | miR-4536-5p           | 1 |
| <i>circL3MBTL4</i> | miR-455-3p.1          | 5 |
| <i>circL3MBTL4</i> | miR-455-3p.2          | 2 |
| <i>circL3MBTL4</i> | miR-455-5p            | 1 |
| <i>circL3MBTL4</i> | miR-4633-5p           | 1 |
| <i>circL3MBTL4</i> | miR-4635              | 4 |
| <i>circL3MBTL4</i> | miR-4638-3p           | 1 |
| <i>circL3MBTL4</i> | miR-4640-3p           | 1 |
| <i>circL3MBTL4</i> | miR-4640-5p           | 2 |
| <i>circL3MBTL4</i> | miR-4641              | 2 |
| <i>circL3MBTL4</i> | miR-4642              | 1 |
| <i>circL3MBTL4</i> | miR-4643              | 1 |
| <i>circL3MBTL4</i> | miR-4645-3p           | 1 |
| <i>circL3MBTL4</i> | miR-4648              | 1 |
| <i>circL3MBTL4</i> | miR-4652-3p           | 4 |
| <i>circL3MBTL4</i> | miR-4653-3p           | 1 |
| <i>circL3MBTL4</i> | miR-4654/4769-5p      | 1 |
| <i>circL3MBTL4</i> | miR-4658/6790-5p      | 1 |
| <i>circL3MBTL4</i> | miR-4659a-3p/4659b-3p | 1 |

|                    |                     |   |
|--------------------|---------------------|---|
| <i>circL3MBTL4</i> | miR-466             | 3 |
| <i>circL3MBTL4</i> | miR-4662-5p         | 1 |
| <i>circL3MBTL4</i> | miR-4662a-3p        | 2 |
| <i>circL3MBTL4</i> | miR-4663            | 2 |
| <i>circL3MBTL4</i> | miR-4666a-3p        | 3 |
| <i>circL3MBTL4</i> | miR-4666b           | 1 |
| <i>circL3MBTL4</i> | miR-4668-3p         | 4 |
| <i>circL3MBTL4</i> | miR-4668-5p         | 2 |
| <i>circL3MBTL4</i> | miR-4669            | 1 |
| <i>circL3MBTL4</i> | miR-4670-3p         | 1 |
| <i>circL3MBTL4</i> | miR-4671-3p         | 1 |
| <i>circL3MBTL4</i> | miR-4677-5p         | 1 |
| <i>circL3MBTL4</i> | miR-4680-5p         | 1 |
| <i>circL3MBTL4</i> | miR-4682            | 1 |
| <i>circL3MBTL4</i> | miR-4683            | 1 |
| <i>circL3MBTL4</i> | miR-4684-3p         | 1 |
| <i>circL3MBTL4</i> | miR-4684-5p         | 1 |
| <i>circL3MBTL4</i> | miR-4686            | 2 |
| <i>circL3MBTL4</i> | miR-4687-3p         | 1 |
| <i>circL3MBTL4</i> | miR-4687-5p         | 2 |
| <i>circL3MBTL4</i> | miR-4690-3p/5685    | 4 |
| <i>circL3MBTL4</i> | miR-4690-5p         | 2 |
| <i>circL3MBTL4</i> | miR-4691-3p         | 3 |
| <i>circL3MBTL4</i> | miR-4691-5p/6792-3p | 1 |
| <i>circL3MBTL4</i> | miR-4693-3p         | 1 |
| <i>circL3MBTL4</i> | miR-4694-3p         | 5 |
| <i>circL3MBTL4</i> | miR-4694-5p         | 2 |
| <i>circL3MBTL4</i> | miR-4695-5p         | 1 |
| <i>circL3MBTL4</i> | miR-4697-3p         | 1 |
| <i>circL3MBTL4</i> | miR-4698            | 4 |
| <i>circL3MBTL4</i> | miR-4699-5p         | 5 |
| <i>circL3MBTL4</i> | miR-4700-3p         | 4 |
| <i>circL3MBTL4</i> | miR-4704-3p         | 1 |
| <i>circL3MBTL4</i> | miR-4706/4749-5p    | 2 |
| <i>circL3MBTL4</i> | miR-4708-3p         | 2 |
| <i>circL3MBTL4</i> | miR-4708-5p         | 2 |
| <i>circL3MBTL4</i> | miR-4709-3p         | 4 |
| <i>circL3MBTL4</i> | miR-4709-5p         | 4 |



|                    |                             |   |
|--------------------|-----------------------------|---|
| <i>circL3MBTL4</i> | miR-4711-5p                 | 1 |
| <i>circL3MBTL4</i> | miR-4712-3p                 | 1 |
| <i>circL3MBTL4</i> | miR-4713-3p                 | 1 |
| <i>circL3MBTL4</i> | miR-4713-5p                 | 2 |
| <i>circL3MBTL4</i> | miR-4714-3p                 | 1 |
| <i>circL3MBTL4</i> | miR-4714-5p                 | 1 |
| <i>circL3MBTL4</i> | miR-4715-3p                 | 1 |
| <i>circL3MBTL4</i> | miR-4715-5p                 | 1 |
| <i>circL3MBTL4</i> | miR-4716-5p                 | 1 |
| <i>circL3MBTL4</i> | miR-4717-3p                 | 2 |
| <i>circL3MBTL4</i> | miR-4717-5p                 | 1 |
| <i>circL3MBTL4</i> | miR-4719                    | 1 |
| <i>circL3MBTL4</i> | miR-4720-3p                 | 1 |
| <i>circL3MBTL4</i> | miR-4720-5p/4799-3p/5588-5p | 1 |
| <i>circL3MBTL4</i> | miR-4722-3p/6727-3p         | 3 |
| <i>circL3MBTL4</i> | miR-4724-3p                 | 1 |
| <i>circL3MBTL4</i> | miR-4725-5p                 | 1 |
| <i>circL3MBTL4</i> | miR-4726-3p                 | 2 |
| <i>circL3MBTL4</i> | miR-4727-5p                 | 3 |
| <i>circL3MBTL4</i> | miR-4728-3p                 | 1 |
| <i>circL3MBTL4</i> | miR-4729                    | 2 |
| <i>circL3MBTL4</i> | miR-4731-3p/4801            | 2 |
| <i>circL3MBTL4</i> | miR-4731-5p                 | 1 |
| <i>circL3MBTL4</i> | miR-4732-3p                 | 2 |
| <i>circL3MBTL4</i> | miR-4733-5p                 | 3 |
| <i>circL3MBTL4</i> | miR-4735-5p                 | 1 |
| <i>circL3MBTL4</i> | miR-4738-3p                 | 2 |
| <i>circL3MBTL4</i> | miR-4738-5p                 | 1 |
| <i>circL3MBTL4</i> | miR-4739                    | 1 |
| <i>circL3MBTL4</i> | miR-4740-5p                 | 1 |
| <i>circL3MBTL4</i> | miR-4742-5p                 | 2 |
| <i>circL3MBTL4</i> | miR-4743-3p                 | 4 |
| <i>circL3MBTL4</i> | miR-4744                    | 4 |
| <i>circL3MBTL4</i> | miR-4747-5p/5196-5p         | 1 |
| <i>circL3MBTL4</i> | miR-4750-3p                 | 1 |
| <i>circL3MBTL4</i> | miR-4752                    | 1 |
| <i>circL3MBTL4</i> | miR-4753-3p                 | 1 |
| <i>circL3MBTL4</i> | miR-4753-5p                 | 1 |

|                    |                     |   |
|--------------------|---------------------|---|
| <i>circL3MBTL4</i> | miR-4755-3p         | 1 |
| <i>circL3MBTL4</i> | miR-4756-3p         | 4 |
| <i>circL3MBTL4</i> | miR-4759            | 1 |
| <i>circL3MBTL4</i> | miR-4760-3p         | 2 |
| <i>circL3MBTL4</i> | miR-4761-3p         | 1 |
| <i>circL3MBTL4</i> | miR-4762-3p         | 1 |
| <i>circL3MBTL4</i> | miR-4763-5p         | 2 |
| <i>circL3MBTL4</i> | miR-4765            | 1 |
| <i>circL3MBTL4</i> | miR-4766-3p         | 1 |
| <i>circL3MBTL4</i> | miR-4768-3p         | 1 |
| <i>circL3MBTL4</i> | miR-4769-3p/6817-5p | 5 |
| <i>circL3MBTL4</i> | miR-4771            | 1 |
| <i>circL3MBTL4</i> | miR-4772-3p         | 2 |
| <i>circL3MBTL4</i> | miR-4772-5p         | 3 |
| <i>circL3MBTL4</i> | miR-4773            | 4 |
| <i>circL3MBTL4</i> | miR-4774-3p         | 2 |
| <i>circL3MBTL4</i> | miR-4774-5p         | 1 |
| <i>circL3MBTL4</i> | miR-4775            | 1 |
| <i>circL3MBTL4</i> | miR-4776-5p         | 1 |
| <i>circL3MBTL4</i> | miR-4778-5p         | 2 |
| <i>circL3MBTL4</i> | miR-4779            | 1 |
| <i>circL3MBTL4</i> | miR-4781-3p         | 3 |
| <i>circL3MBTL4</i> | miR-4781-5p         | 1 |
| <i>circL3MBTL4</i> | miR-4786-3p         | 1 |
| <i>circL3MBTL4</i> | miR-4786-5p         | 1 |
| <i>circL3MBTL4</i> | miR-4787-5p         | 2 |
| <i>circL3MBTL4</i> | miR-4789-3p         | 1 |
| <i>circL3MBTL4</i> | miR-4789-5p         | 3 |
| <i>circL3MBTL4</i> | miR-4790-3p         | 4 |
| <i>circL3MBTL4</i> | miR-4790-5p         | 1 |
| <i>circL3MBTL4</i> | miR-4793-3p         | 5 |
| <i>circL3MBTL4</i> | miR-4793-5p         | 3 |
| <i>circL3MBTL4</i> | miR-4795-3p         | 2 |
| <i>circL3MBTL4</i> | miR-4795-5p         | 1 |
| <i>circL3MBTL4</i> | miR-4796-3p         | 1 |
| <i>circL3MBTL4</i> | miR-4797-5p         | 3 |
| <i>circL3MBTL4</i> | miR-4798-3p         | 1 |
| <i>circL3MBTL4</i> | miR-4798-5p         | 1 |

|                    |                     |   |
|--------------------|---------------------|---|
| <i>circL3MBTL4</i> | miR-4799-5p         | 4 |
| <i>circL3MBTL4</i> | miR-4800-3p         | 1 |
| <i>circL3MBTL4</i> | miR-4800-5p         | 2 |
| <i>circL3MBTL4</i> | miR-4802-3p         | 1 |
| <i>circL3MBTL4</i> | miR-4802-5p         | 2 |
| <i>circL3MBTL4</i> | miR-4803            | 1 |
| <i>circL3MBTL4</i> | miR-4804-3p         | 1 |
| <i>circL3MBTL4</i> | miR-487-3p          | 1 |
| <i>circL3MBTL4</i> | miR-487a-5p/487b-5p | 5 |
| <i>circL3MBTL4</i> | miR-488-3p          | 3 |
| <i>circL3MBTL4</i> | miR-488-5p          | 1 |
| <i>circL3MBTL4</i> | miR-489-3p          | 3 |
| <i>circL3MBTL4</i> | miR-490-5p          | 1 |
| <i>circL3MBTL4</i> | miR-493-3p          | 1 |
| <i>circL3MBTL4</i> | miR-493-5p          | 3 |
| <i>circL3MBTL4</i> | miR-494-3p          | 3 |
| <i>circL3MBTL4</i> | miR-495-3p          | 4 |
| <i>circL3MBTL4</i> | miR-495-5p          | 2 |
| <i>circL3MBTL4</i> | miR-496.2           | 1 |
| <i>circL3MBTL4</i> | miR-497-3p          | 1 |
| <i>circL3MBTL4</i> | miR-498             | 2 |
| <i>circL3MBTL4</i> | miR-499a-3p/499b-3p | 2 |
| <i>circL3MBTL4</i> | miR-499a-5p         | 5 |
| <i>circL3MBTL4</i> | miR-499b-5p         | 3 |
| <i>circL3MBTL4</i> | miR-5000-3p         | 1 |
| <i>circL3MBTL4</i> | miR-5000-5p         | 1 |
| <i>circL3MBTL4</i> | miR-5001-3p         | 3 |
| <i>circL3MBTL4</i> | miR-5002-5p         | 1 |
| <i>circL3MBTL4</i> | miR-5003-3p         | 2 |
| <i>circL3MBTL4</i> | miR-5003-5p         | 2 |
| <i>circL3MBTL4</i> | miR-5004-3p         | 3 |
| <i>circL3MBTL4</i> | miR-5006-5p         | 1 |
| <i>circL3MBTL4</i> | miR-5008-5p         | 2 |
| <i>circL3MBTL4</i> | miR-5009-3p         | 1 |
| <i>circL3MBTL4</i> | miR-500a-5p         | 2 |
| <i>circL3MBTL4</i> | miR-500b-3p         | 1 |
| <i>circL3MBTL4</i> | miR-501-5p          | 2 |
| <i>circL3MBTL4</i> | miR-5010-3p         | 2 |

|                    |                             |   |
|--------------------|-----------------------------|---|
| <i>circL3MBTL4</i> | miR-5011-3p                 | 1 |
| <i>circL3MBTL4</i> | miR-5011-5p                 | 1 |
| <i>circL3MBTL4</i> | miR-502-5p                  | 3 |
| <i>circL3MBTL4</i> | miR-504-3p                  | 1 |
| <i>circL3MBTL4</i> | miR-504-5p.1                | 1 |
| <i>circL3MBTL4</i> | miR-505-3p.2                | 2 |
| <i>circL3MBTL4</i> | miR-505-5p                  | 1 |
| <i>circL3MBTL4</i> | miR-506-5p                  | 3 |
| <i>circL3MBTL4</i> | miR-507/557                 | 1 |
| <i>circL3MBTL4</i> | miR-508-3p                  | 1 |
| <i>circL3MBTL4</i> | miR-5087                    | 1 |
| <i>circL3MBTL4</i> | miR-5088-3p                 | 3 |
| <i>circL3MBTL4</i> | miR-5088-5p                 | 1 |
| <i>circL3MBTL4</i> | miR-5089-3p                 | 1 |
| <i>circL3MBTL4</i> | miR-5089-5p                 | 2 |
| <i>circL3MBTL4</i> | miR-509-3-5p/509-5p/4418    | 2 |
| <i>circL3MBTL4</i> | miR-509-3p                  | 1 |
| <i>circL3MBTL4</i> | miR-5092                    | 3 |
| <i>circL3MBTL4</i> | miR-5094                    | 3 |
| <i>circL3MBTL4</i> | miR-5096                    | 2 |
| <i>circL3MBTL4</i> | miR-510-3p                  | 4 |
| <i>circL3MBTL4</i> | miR-5100                    | 2 |
| <i>circL3MBTL4</i> | miR-511-5p                  | 1 |
| <i>circL3MBTL4</i> | miR-513a-3p/513c-3p/3606-3p | 4 |
| <i>circL3MBTL4</i> | miR-513a-5p                 | 4 |
| <i>circL3MBTL4</i> | miR-513b-3p                 | 3 |
| <i>circL3MBTL4</i> | miR-513b-5p                 | 2 |
| <i>circL3MBTL4</i> | miR-513c-5p/514b-5p         | 1 |
| <i>circL3MBTL4</i> | miR-514a-3p                 | 5 |
| <i>circL3MBTL4</i> | miR-514a-5p                 | 1 |
| <i>circL3MBTL4</i> | miR-515-5p/519e-5p          | 1 |
| <i>circL3MBTL4</i> | miR-5186                    | 2 |
| <i>circL3MBTL4</i> | miR-5187-5p                 | 1 |
| <i>circL3MBTL4</i> | miR-5188                    | 1 |
| <i>circL3MBTL4</i> | miR-5189-3p                 | 1 |
| <i>circL3MBTL4</i> | miR-518a-5p/527             | 3 |
| <i>circL3MBTL4</i> | miR-519-3p                  | 1 |
| <i>circL3MBTL4</i> | miR-5191                    | 2 |

|                    |                                                                  |   |
|--------------------|------------------------------------------------------------------|---|
| <i>circL3MBTL4</i> | miR-5193                                                         | 2 |
| <i>circL3MBTL4</i> | miR-5195-5p                                                      | 1 |
| <i>circL3MBTL4</i> | miR-5196-3p                                                      | 3 |
| <i>circL3MBTL4</i> | miR-5197-3p                                                      | 6 |
| <i>circL3MBTL4</i> | miR-519d-5p                                                      | 1 |
| <i>circL3MBTL4</i> | miR-520f-5p                                                      | 1 |
| <i>circL3MBTL4</i> | miR-520g-3p                                                      | 2 |
| <i>circL3MBTL4</i> | miR-522-3p                                                       | 5 |
| <i>circL3MBTL4</i> | miR-524-5p                                                       | 5 |
| <i>circL3MBTL4</i> | miR-525-5p                                                       | 5 |
| <i>circL3MBTL4</i> | miR-526b-5p                                                      | 1 |
| <i>circL3MBTL4</i> | miR-532-3p                                                       | 1 |
| <i>circL3MBTL4</i> | miR-532-5p                                                       | 1 |
| <i>circL3MBTL4</i> | miR-539-5p                                                       | 7 |
| <i>circL3MBTL4</i> | miR-541-5p                                                       | 1 |
| <i>circL3MBTL4</i> | miR-542-3p                                                       | 1 |
| <i>circL3MBTL4</i> | miR-543                                                          | 2 |
| <i>circL3MBTL4</i> | miR-544a                                                         | 3 |
| <i>circL3MBTL4</i> | miR-545-3p                                                       | 2 |
| <i>circL3MBTL4</i> | miR-545-5p                                                       | 1 |
| <i>circL3MBTL4</i> | miR-548ac/548bb-3p/548d-3p/548h-3p/548z                          | 1 |
| <i>circL3MBTL4</i> | miR-548ah-5p/3609                                                | 1 |
| <i>circL3MBTL4</i> | miR-548aj-5p/548f-5p/548g-5p/548x-5p                             | 7 |
| <i>circL3MBTL4</i> | miR-548an                                                        | 3 |
| <i>circL3MBTL4</i> | miR-548ao-3p                                                     | 4 |
| <i>circL3MBTL4</i> | miR-548ap-3p/548aa/548t-3p                                       | 6 |
| <i>circL3MBTL4</i> | miR-548aq-3p/548am-3p/548aj-3p/548al-3p/548ae-3p/548j-3p/548x-3p | 1 |
| <i>circL3MBTL4</i> | miR-548as-3p                                                     | 6 |
| <i>circL3MBTL4</i> | miR-548at-5p                                                     | 3 |
| <i>circL3MBTL4</i> | miR-548av-5p/548k/8054                                           | 1 |
| <i>circL3MBTL4</i> | miR-548aw                                                        | 3 |
| <i>circL3MBTL4</i> | miR-548ay-3p/548at-3p                                            | 6 |
| <i>circL3MBTL4</i> | miR-548ay-5p/548au-5p/548as-5p/548ar-5p/548aq-5p/548ap-5p/548am- | 1 |
| <i>circL3MBTL4</i> | miR-548az-3p/548ar-3p/548a-3p/548e-3p/548f-3p                    | 1 |
| <i>circL3MBTL4</i> | miR-548az-5p/548t-5p                                             | 2 |
| <i>circL3MBTL4</i> | miR-548b-3p                                                      | 5 |
| <i>circL3MBTL4</i> | miR-548c-3p                                                      | 7 |
| <i>circL3MBTL4</i> | miR-548e-5p                                                      | 3 |

|                    |                               |   |
|--------------------|-------------------------------|---|
| <i>circL3MBTL4</i> | miR-548g-3p                   | 9 |
| <i>circL3MBTL4</i> | miR-548l                      | 1 |
| <i>circL3MBTL4</i> | miR-548m                      | 2 |
| <i>circL3MBTL4</i> | miR-548n                      | 2 |
| <i>circL3MBTL4</i> | miR-548p                      | 5 |
| <i>circL3MBTL4</i> | miR-548s                      | 2 |
| <i>circL3MBTL4</i> | miR-548u/7161-5p              | 3 |
| <i>circL3MBTL4</i> | miR-548v                      | 1 |
| <i>circL3MBTL4</i> | miR-549a                      | 3 |
| <i>circL3MBTL4</i> | miR-550a-3-5p/550a-5p/1271-3p | 1 |
| <i>circL3MBTL4</i> | miR-550b-3p                   | 2 |
| <i>circL3MBTL4</i> | miR-551-3p                    | 1 |
| <i>circL3MBTL4</i> | miR-551b-5p                   | 6 |
| <i>circL3MBTL4</i> | miR-552-3p                    | 1 |
| <i>circL3MBTL4</i> | miR-552-5p                    | 1 |
| <i>circL3MBTL4</i> | miR-553                       | 1 |
| <i>circL3MBTL4</i> | miR-556-3p                    | 1 |
| <i>circL3MBTL4</i> | miR-5571-5p                   | 1 |
| <i>circL3MBTL4</i> | miR-5579-5p                   | 1 |
| <i>circL3MBTL4</i> | miR-558                       | 1 |
| <i>circL3MBTL4</i> | miR-5580-3p                   | 1 |
| <i>circL3MBTL4</i> | miR-5580-5p                   | 1 |
| <i>circL3MBTL4</i> | miR-5581-3p                   | 2 |
| <i>circL3MBTL4</i> | miR-5582-3p                   | 4 |
| <i>circL3MBTL4</i> | miR-5582-5p                   | 2 |
| <i>circL3MBTL4</i> | miR-5583-3p                   | 2 |
| <i>circL3MBTL4</i> | miR-5584-3p                   | 1 |
| <i>circL3MBTL4</i> | miR-5586-3p                   | 1 |
| <i>circL3MBTL4</i> | miR-5586-5p                   | 3 |
| <i>circL3MBTL4</i> | miR-5588-3p                   | 1 |
| <i>circL3MBTL4</i> | miR-5589-3p                   | 3 |
| <i>circL3MBTL4</i> | miR-5589-5p                   | 1 |
| <i>circL3MBTL4</i> | miR-561-3p                    | 3 |
| <i>circL3MBTL4</i> | miR-561-5p                    | 1 |
| <i>circL3MBTL4</i> | miR-5680                      | 4 |
| <i>circL3MBTL4</i> | miR-5681a                     | 3 |
| <i>circL3MBTL4</i> | miR-5681b                     | 1 |
| <i>circL3MBTL4</i> | miR-5682                      | 2 |

|                    |                 |   |
|--------------------|-----------------|---|
| <i>circL3MBTL4</i> | miR-5683        | 1 |
| <i>circL3MBTL4</i> | miR-5684        | 1 |
| <i>circL3MBTL4</i> | miR-5687        | 1 |
| <i>circL3MBTL4</i> | miR-569         | 2 |
| <i>circL3MBTL4</i> | miR-5691        | 1 |
| <i>circL3MBTL4</i> | miR-5692a       | 4 |
| <i>circL3MBTL4</i> | miR-5694        | 1 |
| <i>circL3MBTL4</i> | miR-5695        | 1 |
| <i>circL3MBTL4</i> | miR-5696        | 5 |
| <i>circL3MBTL4</i> | miR-570-3p      | 4 |
| <i>circL3MBTL4</i> | miR-5700        | 2 |
| <i>circL3MBTL4</i> | miR-5701        | 1 |
| <i>circL3MBTL4</i> | miR-5702        | 1 |
| <i>circL3MBTL4</i> | miR-5704        | 1 |
| <i>circL3MBTL4</i> | miR-5707        | 2 |
| <i>circL3MBTL4</i> | miR-571         | 1 |
| <i>circL3MBTL4</i> | miR-573/3616-5p | 1 |
| <i>circL3MBTL4</i> | miR-575/4676-5p | 3 |
| <i>circL3MBTL4</i> | miR-576-3p      | 1 |
| <i>circL3MBTL4</i> | miR-576-5p      | 1 |
| <i>circL3MBTL4</i> | miR-577         | 1 |
| <i>circL3MBTL4</i> | miR-579-3p      | 5 |
| <i>circL3MBTL4</i> | miR-580-3p      | 1 |
| <i>circL3MBTL4</i> | miR-582-3p      | 1 |
| <i>circL3MBTL4</i> | miR-583         | 5 |
| <i>circL3MBTL4</i> | miR-585-5p      | 2 |
| <i>circL3MBTL4</i> | miR-587         | 2 |
| <i>circL3MBTL4</i> | miR-588         | 2 |
| <i>circL3MBTL4</i> | miR-589-3p      | 2 |
| <i>circL3MBTL4</i> | miR-589-5p      | 2 |
| <i>circL3MBTL4</i> | miR-590-3p      | 2 |
| <i>circL3MBTL4</i> | miR-591         | 2 |
| <i>circL3MBTL4</i> | miR-592         | 2 |
| <i>circL3MBTL4</i> | miR-593-3p      | 1 |
| <i>circL3MBTL4</i> | miR-595         | 1 |
| <i>circL3MBTL4</i> | miR-596         | 1 |
| <i>circL3MBTL4</i> | miR-597-5p      | 2 |
| <i>circL3MBTL4</i> | miR-599         | 2 |

|                    |                    |   |
|--------------------|--------------------|---|
| <i>circL3MBTL4</i> | miR-602            | 1 |
| <i>circL3MBTL4</i> | miR-603            | 1 |
| <i>circL3MBTL4</i> | miR-604            | 3 |
| <i>circL3MBTL4</i> | miR-605-3p         | 3 |
| <i>circL3MBTL4</i> | miR-605-5p         | 1 |
| <i>circL3MBTL4</i> | miR-606            | 2 |
| <i>circL3MBTL4</i> | miR-6069           | 1 |
| <i>circL3MBTL4</i> | miR-607            | 1 |
| <i>circL3MBTL4</i> | miR-6072/6891-3p   | 1 |
| <i>circL3MBTL4</i> | miR-6074           | 1 |
| <i>circL3MBTL4</i> | miR-6076/6797-3p   | 1 |
| <i>circL3MBTL4</i> | miR-6077           | 5 |
| <i>circL3MBTL4</i> | miR-6079           | 3 |
| <i>circL3MBTL4</i> | miR-608/4651       | 2 |
| <i>circL3MBTL4</i> | miR-6080           | 1 |
| <i>circL3MBTL4</i> | miR-6081           | 4 |
| <i>circL3MBTL4</i> | miR-6083           | 2 |
| <i>circL3MBTL4</i> | miR-6089           | 2 |
| <i>circL3MBTL4</i> | miR-609            | 1 |
| <i>circL3MBTL4</i> | miR-6090           | 1 |
| <i>circL3MBTL4</i> | miR-611/3131       | 1 |
| <i>circL3MBTL4</i> | miR-6124           | 6 |
| <i>circL3MBTL4</i> | miR-6126           | 2 |
| <i>circL3MBTL4</i> | miR-6128           | 3 |
| <i>circL3MBTL4</i> | miR-6131           | 1 |
| <i>circL3MBTL4</i> | miR-616-3p         | 1 |
| <i>circL3MBTL4</i> | miR-6165           | 2 |
| <i>circL3MBTL4</i> | miR-617            | 4 |
| <i>circL3MBTL4</i> | miR-618            | 1 |
| <i>circL3MBTL4</i> | miR-619-3p         | 1 |
| <i>circL3MBTL4</i> | miR-619-5p/6506-5p | 4 |
| <i>circL3MBTL4</i> | miR-621            | 2 |
| <i>circL3MBTL4</i> | miR-623            | 1 |
| <i>circL3MBTL4</i> | miR-624-3p         | 1 |
| <i>circL3MBTL4</i> | miR-625-3p         | 3 |
| <i>circL3MBTL4</i> | miR-626/6876-3p    | 2 |
| <i>circL3MBTL4</i> | miR-627-3p         | 3 |
| <i>circL3MBTL4</i> | miR-627-5p         | 1 |



|                    |                 |   |
|--------------------|-----------------|---|
| <i>circL3MBTL4</i> | miR-629-3p      | 2 |
| <i>circL3MBTL4</i> | miR-630         | 2 |
| <i>circL3MBTL4</i> | miR-631/3661    | 1 |
| <i>circL3MBTL4</i> | miR-632/4288    | 1 |
| <i>circL3MBTL4</i> | miR-633         | 1 |
| <i>circL3MBTL4</i> | miR-635/6774-5p | 2 |
| <i>circL3MBTL4</i> | miR-636         | 1 |
| <i>circL3MBTL4</i> | miR-638         | 1 |
| <i>circL3MBTL4</i> | miR-640         | 1 |
| <i>circL3MBTL4</i> | miR-641/3617-5p | 3 |
| <i>circL3MBTL4</i> | miR-642b-5p     | 1 |
| <i>circL3MBTL4</i> | miR-643         | 2 |
| <i>circL3MBTL4</i> | miR-644a        | 1 |
| <i>circL3MBTL4</i> | miR-647         | 1 |
| <i>circL3MBTL4</i> | miR-6501-3p     | 2 |
| <i>circL3MBTL4</i> | miR-6501-5p     | 1 |
| <i>circL3MBTL4</i> | miR-6502-3p     | 1 |
| <i>circL3MBTL4</i> | miR-6504-3p     | 2 |
| <i>circL3MBTL4</i> | miR-6505-3p     | 4 |
| <i>circL3MBTL4</i> | miR-6505-5p     | 4 |
| <i>circL3MBTL4</i> | miR-6507-3p     | 2 |
| <i>circL3MBTL4</i> | miR-6507-5p     | 8 |
| <i>circL3MBTL4</i> | miR-6508-3p     | 2 |
| <i>circL3MBTL4</i> | miR-6509-3p     | 1 |
| <i>circL3MBTL4</i> | miR-651-3p      | 5 |
| <i>circL3MBTL4</i> | miR-6510-5p     | 2 |
| <i>circL3MBTL4</i> | miR-6512-5p     | 1 |
| <i>circL3MBTL4</i> | miR-6513-3p     | 1 |
| <i>circL3MBTL4</i> | miR-6513-5p     | 2 |
| <i>circL3MBTL4</i> | miR-6514-5p     | 2 |
| <i>circL3MBTL4</i> | miR-6515-3p     | 2 |
| <i>circL3MBTL4</i> | miR-6515-5p     | 3 |
| <i>circL3MBTL4</i> | miR-6516-3p     | 1 |
| <i>circL3MBTL4</i> | miR-6516-5p     | 2 |
| <i>circL3MBTL4</i> | miR-652-5p      | 2 |
| <i>circL3MBTL4</i> | miR-653-3p      | 1 |
| <i>circL3MBTL4</i> | miR-653-5p      | 3 |
| <i>circL3MBTL4</i> | miR-654-3p      | 2 |

|                    |                     |   |
|--------------------|---------------------|---|
| <i>circL3MBTL4</i> | miR-654-5p          | 1 |
| <i>circL3MBTL4</i> | miR-656-3p          | 1 |
| <i>circL3MBTL4</i> | miR-656-5p          | 1 |
| <i>circL3MBTL4</i> | miR-657             | 1 |
| <i>circL3MBTL4</i> | miR-658             | 1 |
| <i>circL3MBTL4</i> | miR-659-3p          | 2 |
| <i>circL3MBTL4</i> | miR-660-3p          | 2 |
| <i>circL3MBTL4</i> | miR-660-5p          | 3 |
| <i>circL3MBTL4</i> | miR-661             | 1 |
| <i>circL3MBTL4</i> | miR-662             | 1 |
| <i>circL3MBTL4</i> | miR-663b            | 3 |
| <i>circL3MBTL4</i> | miR-664a-3p         | 1 |
| <i>circL3MBTL4</i> | miR-664a-5p/4794    | 1 |
| <i>circL3MBTL4</i> | miR-665             | 1 |
| <i>circL3MBTL4</i> | miR-671-5p          | 2 |
| <i>circL3MBTL4</i> | miR-6715a-3p        | 1 |
| <i>circL3MBTL4</i> | miR-6715b-3p        | 3 |
| <i>circL3MBTL4</i> | miR-6719-3p         | 2 |
| <i>circL3MBTL4</i> | miR-6720-5p         | 2 |
| <i>circL3MBTL4</i> | miR-6724-5p/6773-5p | 2 |
| <i>circL3MBTL4</i> | miR-6728-5p         | 2 |
| <i>circL3MBTL4</i> | miR-6729-3p         | 2 |
| <i>circL3MBTL4</i> | miR-6730-3p         | 2 |
| <i>circL3MBTL4</i> | miR-6730-5p         | 3 |
| <i>circL3MBTL4</i> | miR-6731-3p         | 2 |
| <i>circL3MBTL4</i> | miR-6731-5p/8085    | 1 |
| <i>circL3MBTL4</i> | miR-6732-3p         | 3 |
| <i>circL3MBTL4</i> | miR-6733-3p         | 1 |
| <i>circL3MBTL4</i> | miR-6734-3p         | 4 |
| <i>circL3MBTL4</i> | miR-6735-3p         | 2 |
| <i>circL3MBTL4</i> | miR-6738-3p         | 3 |
| <i>circL3MBTL4</i> | miR-6739-3p         | 2 |
| <i>circL3MBTL4</i> | miR-6740-5p         | 2 |
| <i>circL3MBTL4</i> | miR-6741-5p         | 4 |
| <i>circL3MBTL4</i> | miR-6742-3p         | 2 |
| <i>circL3MBTL4</i> | miR-6744-5p         | 1 |
| <i>circL3MBTL4</i> | miR-6747-3p         | 3 |
| <i>circL3MBTL4</i> | miR-6747-5p         | 2 |

|                    |                             |   |
|--------------------|-----------------------------|---|
| <i>circL3MBTL4</i> | miR-6748-3p                 | 1 |
| <i>circL3MBTL4</i> | miR-6748-5p                 | 1 |
| <i>circL3MBTL4</i> | miR-6749-3p                 | 1 |
| <i>circL3MBTL4</i> | miR-675-3p                  | 1 |
| <i>circL3MBTL4</i> | miR-675-5p/4466             | 1 |
| <i>circL3MBTL4</i> | miR-6750-3p                 | 1 |
| <i>circL3MBTL4</i> | miR-6752-5p/6842-5p/7110-5p | 2 |
| <i>circL3MBTL4</i> | miR-6753-3p/7107-3p         | 1 |
| <i>circL3MBTL4</i> | miR-6755-3p                 | 1 |
| <i>circL3MBTL4</i> | miR-6756-5p/6766-5p         | 4 |
| <i>circL3MBTL4</i> | miR-6757-3p                 | 1 |
| <i>circL3MBTL4</i> | miR-6757-5p                 | 1 |
| <i>circL3MBTL4</i> | miR-6758-5p/6856-5p         | 1 |
| <i>circL3MBTL4</i> | miR-6759-3p                 | 1 |
| <i>circL3MBTL4</i> | miR-676-3p                  | 2 |
| <i>circL3MBTL4</i> | miR-676-5p                  | 2 |
| <i>circL3MBTL4</i> | miR-6760-3p                 | 1 |
| <i>circL3MBTL4</i> | miR-6760-5p                 | 1 |
| <i>circL3MBTL4</i> | miR-6761-5p                 | 3 |
| <i>circL3MBTL4</i> | miR-6762-3p                 | 3 |
| <i>circL3MBTL4</i> | miR-6763-3p                 | 1 |
| <i>circL3MBTL4</i> | miR-6765-3p                 | 1 |
| <i>circL3MBTL4</i> | miR-6768-3p                 | 3 |
| <i>circL3MBTL4</i> | miR-6768-5p                 | 2 |
| <i>circL3MBTL4</i> | miR-6769a-5p/6769b-5p       | 1 |
| <i>circL3MBTL4</i> | miR-6770-5p                 | 2 |
| <i>circL3MBTL4</i> | miR-6771-3p                 | 2 |
| <i>circL3MBTL4</i> | miR-6771-5p                 | 1 |
| <i>circL3MBTL4</i> | miR-6772-3p                 | 1 |
| <i>circL3MBTL4</i> | miR-6772-5p                 | 1 |
| <i>circL3MBTL4</i> | miR-6776-3p                 | 3 |
| <i>circL3MBTL4</i> | miR-6776-5p                 | 1 |
| <i>circL3MBTL4</i> | miR-6778-3p                 | 1 |
| <i>circL3MBTL4</i> | miR-6779-3p                 | 2 |
| <i>circL3MBTL4</i> | miR-6780a-3p                | 2 |
| <i>circL3MBTL4</i> | miR-6782-3p                 | 1 |
| <i>circL3MBTL4</i> | miR-6787-3p                 | 1 |
| <i>circL3MBTL4</i> | miR-6790-3p                 | 2 |

|                    |                     |   |
|--------------------|---------------------|---|
| <i>circL3MBTL4</i> | miR-6791-3p/6829-3p | 1 |
| <i>circL3MBTL4</i> | miR-6792-5p         | 2 |
| <i>circL3MBTL4</i> | miR-6793-3p         | 2 |
| <i>circL3MBTL4</i> | miR-6793-5p         | 1 |
| <i>circL3MBTL4</i> | miR-6800-3p         | 1 |
| <i>circL3MBTL4</i> | miR-6800-5p         | 1 |
| <i>circL3MBTL4</i> | miR-6801-3p/6810-3p | 1 |
| <i>circL3MBTL4</i> | miR-6801-5p         | 1 |
| <i>circL3MBTL4</i> | miR-6802-3p         | 1 |
| <i>circL3MBTL4</i> | miR-6802-5p         | 1 |
| <i>circL3MBTL4</i> | miR-6804-3p         | 1 |
| <i>circL3MBTL4</i> | miR-6808-3p         | 1 |
| <i>circL3MBTL4</i> | miR-6810-5p         | 1 |
| <i>circL3MBTL4</i> | miR-6813-3p         | 1 |
| <i>circL3MBTL4</i> | miR-6814-5p         | 2 |
| <i>circL3MBTL4</i> | miR-6815-3p         | 1 |
| <i>circL3MBTL4</i> | miR-6815-5p/6865-5p | 1 |
| <i>circL3MBTL4</i> | miR-6816-3p         | 1 |
| <i>circL3MBTL4</i> | miR-6817-3p         | 2 |
| <i>circL3MBTL4</i> | miR-6818-3p         | 1 |
| <i>circL3MBTL4</i> | miR-6818-5p         | 3 |
| <i>circL3MBTL4</i> | miR-6819-3p/6877-3p | 1 |
| <i>circL3MBTL4</i> | miR-6821-3p         | 2 |
| <i>circL3MBTL4</i> | miR-6826-3p         | 1 |
| <i>circL3MBTL4</i> | miR-6826-5p         | 1 |
| <i>circL3MBTL4</i> | miR-6827-5p         | 1 |
| <i>circL3MBTL4</i> | miR-6828-5p         | 2 |
| <i>circL3MBTL4</i> | miR-6830-5p         | 6 |
| <i>circL3MBTL4</i> | miR-6831-3p         | 3 |
| <i>circL3MBTL4</i> | miR-6832-3p         | 2 |
| <i>circL3MBTL4</i> | miR-6833-5p         | 1 |
| <i>circL3MBTL4</i> | miR-6834-3p         | 1 |
| <i>circL3MBTL4</i> | miR-6835-5p         | 2 |
| <i>circL3MBTL4</i> | miR-6836-3p         | 2 |
| <i>circL3MBTL4</i> | miR-6837-3p         | 2 |
| <i>circL3MBTL4</i> | miR-6838-3p         | 5 |
| <i>circL3MBTL4</i> | miR-6839-3p         | 1 |
| <i>circL3MBTL4</i> | miR-6840-3p         | 2 |

|                    |                     |   |
|--------------------|---------------------|---|
| <i>circL3MBTL4</i> | miR-6842-3p         | 1 |
| <i>circL3MBTL4</i> | miR-6843-3p/6848-3p | 3 |
| <i>circL3MBTL4</i> | miR-6844            | 2 |
| <i>circL3MBTL4</i> | miR-6845-3p         | 1 |
| <i>circL3MBTL4</i> | miR-6846-3p         | 1 |
| <i>circL3MBTL4</i> | miR-6847-3p         | 1 |
| <i>circL3MBTL4</i> | miR-6849-3p         | 2 |
| <i>circL3MBTL4</i> | miR-6852-5p         | 2 |
| <i>circL3MBTL4</i> | miR-6853-3p         | 4 |
| <i>circL3MBTL4</i> | miR-6854-3p         | 1 |
| <i>circL3MBTL4</i> | miR-6856-3p         | 4 |
| <i>circL3MBTL4</i> | miR-6857-3p         | 1 |
| <i>circL3MBTL4</i> | miR-6857-5p         | 1 |
| <i>circL3MBTL4</i> | miR-6858-3p         | 3 |
| <i>circL3MBTL4</i> | miR-6859-3p         | 1 |
| <i>circL3MBTL4</i> | miR-6861-5p         | 1 |
| <i>circL3MBTL4</i> | miR-6864-5p         | 2 |
| <i>circL3MBTL4</i> | miR-6867-3p         | 2 |
| <i>circL3MBTL4</i> | miR-6867-5p         | 2 |
| <i>circL3MBTL4</i> | miR-6868-3p         | 2 |
| <i>circL3MBTL4</i> | miR-6868-5p         | 1 |
| <i>circL3MBTL4</i> | miR-6871-3p         | 2 |
| <i>circL3MBTL4</i> | miR-6871-5p         | 1 |
| <i>circL3MBTL4</i> | miR-6872-3p         | 3 |
| <i>circL3MBTL4</i> | miR-6873-3p         | 2 |
| <i>circL3MBTL4</i> | miR-6874-5p         | 1 |
| <i>circL3MBTL4</i> | miR-6875-3p         | 1 |
| <i>circL3MBTL4</i> | miR-6878-3p         | 2 |
| <i>circL3MBTL4</i> | miR-6878-5p         | 1 |
| <i>circL3MBTL4</i> | miR-6880-5p         | 1 |
| <i>circL3MBTL4</i> | miR-6881-3p         | 2 |
| <i>circL3MBTL4</i> | miR-6882-3p         | 1 |
| <i>circL3MBTL4</i> | miR-6882-5p         | 1 |
| <i>circL3MBTL4</i> | miR-6883-3p         | 2 |
| <i>circL3MBTL4</i> | miR-6884-3p         | 3 |
| <i>circL3MBTL4</i> | miR-6886-3p         | 1 |
| <i>circL3MBTL4</i> | miR-6888-3p         | 1 |
| <i>circL3MBTL4</i> | miR-6888-5p         | 6 |

|                    |             |   |
|--------------------|-------------|---|
| <i>circL3MBTL4</i> | miR-6890-3p | 3 |
| <i>circL3MBTL4</i> | miR-6890-5p | 1 |
| <i>circL3MBTL4</i> | miR-6892-5p | 1 |
| <i>circL3MBTL4</i> | miR-6895-3p | 1 |
| <i>circL3MBTL4</i> | miR-7-5p    | 5 |
| <i>circL3MBTL4</i> | miR-708-3p  | 2 |
| <i>circL3MBTL4</i> | miR-7108-5p | 2 |
| <i>circL3MBTL4</i> | miR-7109-3p | 1 |
| <i>circL3MBTL4</i> | miR-7110-3p | 2 |
| <i>circL3MBTL4</i> | miR-7111-3p | 2 |
| <i>circL3MBTL4</i> | miR-7112-3p | 1 |
| <i>circL3MBTL4</i> | miR-7113-3p | 1 |
| <i>circL3MBTL4</i> | miR-7114-5p | 1 |
| <i>circL3MBTL4</i> | miR-7151-5p | 1 |
| <i>circL3MBTL4</i> | miR-7152-3p | 1 |
| <i>circL3MBTL4</i> | miR-7152-5p | 4 |
| <i>circL3MBTL4</i> | miR-7156-3p | 1 |
| <i>circL3MBTL4</i> | miR-7158-3p | 4 |
| <i>circL3MBTL4</i> | miR-7158-5p | 1 |
| <i>circL3MBTL4</i> | miR-7159-3p | 3 |
| <i>circL3MBTL4</i> | miR-7159-5p | 2 |
| <i>circL3MBTL4</i> | miR-7160-5p | 2 |
| <i>circL3MBTL4</i> | miR-7161-3p | 2 |
| <i>circL3MBTL4</i> | miR-744-3p  | 1 |
| <i>circL3MBTL4</i> | miR-744-5p  | 2 |
| <i>circL3MBTL4</i> | miR-759     | 1 |
| <i>circL3MBTL4</i> | miR-766-3p  | 1 |
| <i>circL3MBTL4</i> | miR-769-5p  | 1 |
| <i>circL3MBTL4</i> | miR-7703    | 1 |
| <i>circL3MBTL4</i> | miR-7705    | 1 |
| <i>circL3MBTL4</i> | miR-7843-3p | 2 |
| <i>circL3MBTL4</i> | miR-7844-5p | 6 |
| <i>circL3MBTL4</i> | miR-7846-3p | 1 |
| <i>circL3MBTL4</i> | miR-7847-3p | 1 |
| <i>circL3MBTL4</i> | miR-7850-5p | 5 |
| <i>circL3MBTL4</i> | miR-7851-3p | 1 |
| <i>circL3MBTL4</i> | miR-7856-5p | 3 |
| <i>circL3MBTL4</i> | miR-7973    | 1 |

|                    |                              |   |
|--------------------|------------------------------|---|
| <i>circL3MBTL4</i> | miR-7974                     | 1 |
| <i>circL3MBTL4</i> | miR-7976                     | 2 |
| <i>circL3MBTL4</i> | miR-7977                     | 1 |
| <i>circL3MBTL4</i> | miR-802                      | 1 |
| <i>circL3MBTL4</i> | miR-8055                     | 2 |
| <i>circL3MBTL4</i> | miR-8056                     | 1 |
| <i>circL3MBTL4</i> | miR-8060                     | 5 |
| <i>circL3MBTL4</i> | miR-8063                     | 4 |
| <i>circL3MBTL4</i> | miR-8064                     | 1 |
| <i>circL3MBTL4</i> | miR-8065                     | 1 |
| <i>circL3MBTL4</i> | miR-8068                     | 2 |
| <i>circL3MBTL4</i> | miR-8069                     | 6 |
| <i>circL3MBTL4</i> | miR-8070                     | 1 |
| <i>circL3MBTL4</i> | miR-8071                     | 1 |
| <i>circL3MBTL4</i> | miR-8076                     | 1 |
| <i>circL3MBTL4</i> | miR-8077                     | 2 |
| <i>circL3MBTL4</i> | miR-8080                     | 1 |
| <i>circL3MBTL4</i> | miR-8081                     | 1 |
| <i>circL3MBTL4</i> | miR-8083                     | 1 |
| <i>circL3MBTL4</i> | miR-8087                     | 2 |
| <i>circL3MBTL4</i> | miR-8485                     | 1 |
| <i>circL3MBTL4</i> | miR-873-5p.1                 | 6 |
| <i>circL3MBTL4</i> | miR-874-3p                   | 1 |
| <i>circL3MBTL4</i> | miR-877-3p                   | 1 |
| <i>circL3MBTL4</i> | miR-885-5p                   | 1 |
| <i>circL3MBTL4</i> | miR-887-5p                   | 2 |
| <i>circL3MBTL4</i> | miR-888-5p                   | 2 |
| <i>circL3MBTL4</i> | miR-889-3p                   | 3 |
| <i>circL3MBTL4</i> | miR-890                      | 1 |
| <i>circL3MBTL4</i> | miR-891a-3p                  | 2 |
| <i>circL3MBTL4</i> | miR-892-5p                   | 3 |
| <i>circL3MBTL4</i> | miR-892b                     | 3 |
| <i>circL3MBTL4</i> | miR-9-3p                     | 1 |
| <i>circL3MBTL4</i> | miR-920/4300/5591-5p/6726-5p | 1 |
| <i>circL3MBTL4</i> | miR-921                      | 1 |
| <i>circL3MBTL4</i> | miR-922                      | 2 |
| <i>circL3MBTL4</i> | miR-92a-1-5p                 | 4 |
| <i>circL3MBTL4</i> | miR-92a-2-5p                 | 1 |

|                    |                                       |   |
|--------------------|---------------------------------------|---|
| <i>circL3MBTL4</i> | miR-935                               | 1 |
| <i>circL3MBTL4</i> | miR-936                               | 2 |
| <i>circL3MBTL4</i> | miR-937-5p                            | 1 |
| <i>circL3MBTL4</i> | miR-938                               | 1 |
| <i>circL3MBTL4</i> | miR-939-3p                            | 2 |
| <i>circL3MBTL4</i> | miR-940/6808-5p/6893-5p               | 2 |
| <i>circL3MBTL4</i> | miR-944                               | 2 |
| <i>circL3MBTL4</i> | miR-95-5p                             | 3 |
| <i>circL3MBTL4</i> | miR-329-5p                            | 1 |
| <i>circL3MBTL4</i> | miR-377-5p/6086                       | 1 |
| <i>circL3MBTL4</i> | miR-4257                              | 1 |
| <i>circL3MBTL4</i> | miR-655-5p                            | 1 |
| <i>circL3MBTL4</i> | miR-6847-5p                           | 1 |
| <i>circL3MBTL4</i> | miR-101-5p                            | 1 |
| <i>circL3MBTL4</i> | miR-147b                              | 1 |
| <i>circL3MBTL4</i> | miR-210-3p                            | 1 |
| <i>circL3MBTL4</i> | miR-3152-3p                           | 1 |
| <i>circL3MBTL4</i> | miR-8066                              | 1 |
| <i>circL3MBTL4</i> | miR-335-5p                            | 1 |
| <i>circLIFR</i>    | let-7a-3p/let-7b-3p/let-7f-1-3p/98-3p | 2 |
| <i>circLIFR</i>    | let-7f-2-3p/1185-3p                   | 2 |
| <i>circLIFR</i>    | miR-1-3p/206                          | 2 |
| <i>circLIFR</i>    | miR-1-5p                              | 1 |
| <i>circLIFR</i>    | miR-10-5p                             | 3 |
| <i>circLIFR</i>    | miR-100-3p                            | 1 |
| <i>circLIFR</i>    | miR-101-3p.2                          | 1 |
| <i>circLIFR</i>    | miR-101-5p                            | 3 |
| <i>circLIFR</i>    | miR-105-5p                            | 7 |
| <i>circLIFR</i>    | miR-106a-3p                           | 1 |
| <i>circLIFR</i>    | miR-10b-3p                            | 3 |
| <i>circLIFR</i>    | miR-1178-3p                           | 1 |
| <i>circLIFR</i>    | miR-1179                              | 3 |
| <i>circLIFR</i>    | miR-1180-5p                           | 1 |
| <i>circLIFR</i>    | miR-1183                              | 2 |
| <i>circLIFR</i>    | miR-1184                              | 2 |
| <i>circLIFR</i>    | miR-1185-5p                           | 2 |
| <i>circLIFR</i>    | miR-1199-5p/6751-3p                   | 1 |
| <i>circLIFR</i>    | miR-1200                              | 1 |



|                 |                     |   |
|-----------------|---------------------|---|
| <i>circLIFR</i> | miR-1203            | 2 |
| <i>circLIFR</i> | miR-1205            | 2 |
| <i>circLIFR</i> | miR-1206            | 2 |
| <i>circLIFR</i> | miR-1207-3p         | 1 |
| <i>circLIFR</i> | miR-1207-5p/4763-3p | 2 |
| <i>circLIFR</i> | miR-122-5p          | 4 |
| <i>circLIFR</i> | miR-1224-5p         | 5 |
| <i>circLIFR</i> | miR-1226-3p         | 1 |
| <i>circLIFR</i> | miR-1226-5p         | 1 |
| <i>circLIFR</i> | miR-1227-3p         | 1 |
| <i>circLIFR</i> | miR-1228-3p         | 1 |
| <i>circLIFR</i> | miR-1228-5p         | 1 |
| <i>circLIFR</i> | miR-1231            | 2 |
| <i>circLIFR</i> | miR-1233-3p         | 1 |
| <i>circLIFR</i> | miR-1233-5p/6778-5p | 1 |
| <i>circLIFR</i> | miR-1236-5p         | 2 |
| <i>circLIFR</i> | miR-1237-3p         | 1 |
| <i>circLIFR</i> | miR-1238-3p         | 2 |
| <i>circLIFR</i> | miR-124-5p          | 5 |
| <i>circLIFR</i> | miR-1243            | 3 |
| <i>circLIFR</i> | miR-1244            | 1 |
| <i>circLIFR</i> | miR-1245a/8079      | 2 |
| <i>circLIFR</i> | miR-1245b-3p        | 8 |
| <i>circLIFR</i> | miR-1246            | 2 |
| <i>circLIFR</i> | miR-1248            | 1 |
| <i>circLIFR</i> | miR-1249-3p         | 1 |
| <i>circLIFR</i> | miR-1249-5p/6797-5p | 4 |
| <i>circLIFR</i> | miR-125-5p          | 3 |
| <i>circLIFR</i> | miR-1250-3p         | 4 |
| <i>circLIFR</i> | miR-1252-3p         | 5 |
| <i>circLIFR</i> | miR-1252-5p         | 1 |
| <i>circLIFR</i> | miR-1253            | 2 |
| <i>circLIFR</i> | miR-1254/3116       | 1 |
| <i>circLIFR</i> | miR-1255a/1255b-5p  | 1 |
| <i>circLIFR</i> | miR-1256            | 3 |
| <i>circLIFR</i> | miR-1258            | 1 |
| <i>circLIFR</i> | miR-125a-3p         | 1 |
| <i>circLIFR</i> | miR-125b-1-3p       | 1 |

|                 |                   |   |
|-----------------|-------------------|---|
| <i>circLIFR</i> | miR-125b-2-3p     | 1 |
| <i>circLIFR</i> | miR-126-5p        | 4 |
| <i>circLIFR</i> | miR-1261          | 2 |
| <i>circLIFR</i> | miR-1263          | 2 |
| <i>circLIFR</i> | miR-1266-5p/4518  | 1 |
| <i>circLIFR</i> | miR-1267          | 2 |
| <i>circLIFR</i> | miR-1269          | 1 |
| <i>circLIFR</i> | miR-127-5p        | 3 |
| <i>circLIFR</i> | miR-1270          | 4 |
| <i>circLIFR</i> | miR-1272          | 1 |
| <i>circLIFR</i> | miR-1273a         | 1 |
| <i>circLIFR</i> | miR-1273c         | 1 |
| <i>circLIFR</i> | miR-1273d         | 1 |
| <i>circLIFR</i> | miR-1273g-5p      | 1 |
| <i>circLIFR</i> | miR-1273h-3p      | 5 |
| <i>circLIFR</i> | miR-1276          | 4 |
| <i>circLIFR</i> | miR-1277-5p       | 2 |
| <i>circLIFR</i> | miR-1279          | 1 |
| <i>circLIFR</i> | miR-128-1-5p      | 1 |
| <i>circLIFR</i> | miR-128-3p        | 2 |
| <i>circLIFR</i> | miR-1282          | 1 |
| <i>circLIFR</i> | miR-1283          | 5 |
| <i>circLIFR</i> | miR-1285-5p       | 2 |
| <i>circLIFR</i> | miR-1286          | 1 |
| <i>circLIFR</i> | miR-1287-5p       | 2 |
| <i>circLIFR</i> | miR-1288-3p       | 4 |
| <i>circLIFR</i> | miR-129-3p        | 1 |
| <i>circLIFR</i> | miR-129-5p        | 3 |
| <i>circLIFR</i> | miR-1293/4483     | 1 |
| <i>circLIFR</i> | miR-1295b-5p/1912 | 2 |
| <i>circLIFR</i> | miR-1296-3p       | 2 |
| <i>circLIFR</i> | miR-1298-3p       | 1 |
| <i>circLIFR</i> | miR-1298-5p       | 1 |
| <i>circLIFR</i> | miR-1299          | 6 |
| <i>circLIFR</i> | miR-1303          | 1 |
| <i>circLIFR</i> | miR-1304-5p       | 4 |
| <i>circLIFR</i> | miR-1305          | 3 |
| <i>circLIFR</i> | miR-1306-5p       | 4 |

|                 |                                    |   |
|-----------------|------------------------------------|---|
| <i>circLIFR</i> | miR-130b-5p                        | 3 |
| <i>circLIFR</i> | miR-132-3p/212-3p                  | 2 |
| <i>circLIFR</i> | miR-132-5p                         | 2 |
| <i>circLIFR</i> | miR-1322                           | 1 |
| <i>circLIFR</i> | miR-1323                           | 3 |
| <i>circLIFR</i> | miR-1324                           | 1 |
| <i>circLIFR</i> | miR-133a-3p.1                      | 2 |
| <i>circLIFR</i> | miR-133a-5p                        | 1 |
| <i>circLIFR</i> | miR-134-3p                         | 3 |
| <i>circLIFR</i> | miR-134-5p                         | 2 |
| <i>circLIFR</i> | miR-1343-3p                        | 1 |
| <i>circLIFR</i> | miR-135b-3p                        | 3 |
| <i>circLIFR</i> | miR-136-5p                         | 2 |
| <i>circLIFR</i> | miR-137                            | 1 |
| <i>circLIFR</i> | miR-138-5p                         | 1 |
| <i>circLIFR</i> | miR-140-3p.1                       | 1 |
| <i>circLIFR</i> | miR-140-5p                         | 1 |
| <i>circLIFR</i> | miR-141-5p                         | 1 |
| <i>circLIFR</i> | miR-142-3p.1                       | 4 |
| <i>circLIFR</i> | miR-142-3p.2                       | 3 |
| <i>circLIFR</i> | miR-143-5p                         | 2 |
| <i>circLIFR</i> | miR-144-5p                         | 1 |
| <i>circLIFR</i> | miR-145-3p                         | 2 |
| <i>circLIFR</i> | miR-145-5p                         | 1 |
| <i>circLIFR</i> | miR-1468-3p                        | 1 |
| <i>circLIFR</i> | miR-146a-3p                        | 3 |
| <i>circLIFR</i> | miR-146b-3p                        | 1 |
| <i>circLIFR</i> | miR-1470                           | 1 |
| <i>circLIFR</i> | miR-147a                           | 1 |
| <i>circLIFR</i> | miR-148-3p/152-3p                  | 1 |
| <i>circLIFR</i> | miR-148a-5p                        | 4 |
| <i>circLIFR</i> | miR-148b-5p/6874-3p                | 4 |
| <i>circLIFR</i> | miR-149-3p/4728-5p/6785-5p/6883-5p | 2 |
| <i>circLIFR</i> | miR-150-3p                         | 2 |
| <i>circLIFR</i> | miR-150-5p                         | 1 |
| <i>circLIFR</i> | miR-151-3p                         | 1 |
| <i>circLIFR</i> | miR-152-5p                         | 1 |
| <i>circLIFR</i> | miR-153-5p                         | 3 |

|                 |                                     |   |
|-----------------|-------------------------------------|---|
| <i>circLIFR</i> | miR-1537-5p                         | 1 |
| <i>circLIFR</i> | miR-1538/4745-3p                    | 2 |
| <i>circLIFR</i> | miR-154-5p                          | 1 |
| <i>circLIFR</i> | miR-155-3p                          | 2 |
| <i>circLIFR</i> | miR-1587/3620-5p                    | 3 |
| <i>circLIFR</i> | miR-15a-3p                          | 1 |
| <i>circLIFR</i> | miR-15b-3p                          | 3 |
| <i>circLIFR</i> | miR-16-1-3p                         | 2 |
| <i>circLIFR</i> | miR-17-3p                           | 2 |
| <i>circLIFR</i> | miR-17-5p/20-5p/93-5p/106-5p/519-3p | 5 |
| <i>circLIFR</i> | miR-181-3p/4420                     | 1 |
| <i>circLIFR</i> | miR-181-5p                          | 2 |
| <i>circLIFR</i> | miR-182-5p                          | 1 |
| <i>circLIFR</i> | miR-1825                            | 2 |
| <i>circLIFR</i> | miR-1827                            | 1 |
| <i>circLIFR</i> | miR-183-3p                          | 3 |
| <i>circLIFR</i> | miR-183-5p.1                        | 1 |
| <i>circLIFR</i> | miR-185-3p                          | 2 |
| <i>circLIFR</i> | miR-185-5p                          | 1 |
| <i>circLIFR</i> | miR-186-5p                          | 4 |
| <i>circLIFR</i> | miR-187-3p                          | 1 |
| <i>circLIFR</i> | miR-188-5p                          | 2 |
| <i>circLIFR</i> | miR-18a-3p                          | 1 |
| <i>circLIFR</i> | miR-190-5p                          | 1 |
| <i>circLIFR</i> | miR-1908-5p                         | 1 |
| <i>circLIFR</i> | miR-190a-3p                         | 3 |
| <i>circLIFR</i> | miR-1910-3p/6511a-5p                | 1 |
| <i>circLIFR</i> | miR-1910-5p                         | 2 |
| <i>circLIFR</i> | miR-1911-3p                         | 1 |
| <i>circLIFR</i> | miR-1911-5p                         | 1 |
| <i>circLIFR</i> | miR-1914-5p                         | 3 |
| <i>circLIFR</i> | miR-1915-3p/6764-5p                 | 1 |
| <i>circLIFR</i> | miR-193b-5p                         | 1 |
| <i>circLIFR</i> | miR-194-3p                          | 3 |
| <i>circLIFR</i> | miR-196a-3p                         | 1 |
| <i>circLIFR</i> | miR-196b-3p                         | 2 |
| <i>circLIFR</i> | miR-197-3p                          | 2 |
| <i>circLIFR</i> | miR-1972                            | 4 |

|                 |                     |   |
|-----------------|---------------------|---|
| <i>circLIFR</i> | miR-199-3p          | 1 |
| <i>circLIFR</i> | miR-199-5p          | 2 |
| <i>circLIFR</i> | miR-200-3p/429      | 1 |
| <i>circLIFR</i> | miR-202-3p          | 1 |
| <i>circLIFR</i> | miR-202-5p          | 2 |
| <i>circLIFR</i> | miR-203a-3p.1       | 2 |
| <i>circLIFR</i> | miR-203a-5p         | 1 |
| <i>circLIFR</i> | miR-203b-3p         | 1 |
| <i>circLIFR</i> | miR-203b-5p/6718-5p | 2 |
| <i>circLIFR</i> | miR-204-3p/4646-5p  | 1 |
| <i>circLIFR</i> | miR-204-5p/211-5p   | 2 |
| <i>circLIFR</i> | miR-205-3p          | 2 |
| <i>circLIFR</i> | miR-205-5p          | 2 |
| <i>circLIFR</i> | miR-2053            | 2 |
| <i>circLIFR</i> | miR-2054            | 2 |
| <i>circLIFR</i> | miR-20a-3p          | 2 |
| <i>circLIFR</i> | miR-20b-3p          | 1 |
| <i>circLIFR</i> | miR-210-5p          | 1 |
| <i>circLIFR</i> | miR-2110            | 1 |
| <i>circLIFR</i> | miR-2113            | 2 |
| <i>circLIFR</i> | miR-2114-3p         | 3 |
| <i>circLIFR</i> | miR-2114-5p         | 3 |
| <i>circLIFR</i> | miR-2115-3p         | 2 |
| <i>circLIFR</i> | miR-2115-5p         | 1 |
| <i>circLIFR</i> | miR-2116-3p         | 1 |
| <i>circLIFR</i> | miR-2116-5p         | 5 |
| <i>circLIFR</i> | miR-212-5p          | 1 |
| <i>circLIFR</i> | miR-215-3p          | 1 |
| <i>circLIFR</i> | miR-217             | 2 |
| <i>circLIFR</i> | miR-218-5p          | 1 |
| <i>circLIFR</i> | miR-219-5p          | 1 |
| <i>circLIFR</i> | miR-219a-1-3p       | 1 |
| <i>circLIFR</i> | miR-219a-2-3p       | 5 |
| <i>circLIFR</i> | miR-219b-3p         | 5 |
| <i>circLIFR</i> | miR-22-3p           | 1 |
| <i>circLIFR</i> | miR-22-5p           | 5 |
| <i>circLIFR</i> | miR-221-3p/222-3p   | 4 |
| <i>circLIFR</i> | miR-221-5p/8073     | 1 |

|                 |                                     |   |
|-----------------|-------------------------------------|---|
| <i>circLIFR</i> | miR-222-5p                          | 1 |
| <i>circLIFR</i> | miR-223-3p                          | 1 |
| <i>circLIFR</i> | miR-2276-3p                         | 1 |
| <i>circLIFR</i> | miR-2276-5p                         | 3 |
| <i>circLIFR</i> | miR-2277-3p                         | 2 |
| <i>circLIFR</i> | miR-2278                            | 1 |
| <i>circLIFR</i> | miR-23-3p                           | 3 |
| <i>circLIFR</i> | miR-2355-3p                         | 1 |
| <i>circLIFR</i> | miR-2355-5p                         | 3 |
| <i>circLIFR</i> | miR-2392                            | 4 |
| <i>circLIFR</i> | miR-24-3p                           | 3 |
| <i>circLIFR</i> | miR-2467-3p                         | 3 |
| <i>circLIFR</i> | miR-2467-5p                         | 2 |
| <i>circLIFR</i> | miR-25-3p/32-5p/92-3p/363-3p/367-3p | 2 |
| <i>circLIFR</i> | miR-25-5p                           | 1 |
| <i>circLIFR</i> | miR-26-5p                           | 2 |
| <i>circLIFR</i> | miR-2681-3p                         | 1 |
| <i>circLIFR</i> | miR-2681-5p                         | 4 |
| <i>circLIFR</i> | miR-26b-3p                          | 3 |
| <i>circLIFR</i> | miR-2861                            | 2 |
| <i>circLIFR</i> | miR-29-3p                           | 4 |
| <i>circLIFR</i> | miR-296-3p                          | 2 |
| <i>circLIFR</i> | miR-296-5p                          | 3 |
| <i>circLIFR</i> | miR-297                             | 3 |
| <i>circLIFR</i> | miR-298                             | 3 |
| <i>circLIFR</i> | miR-299-3p                          | 3 |
| <i>circLIFR</i> | miR-299-5p                          | 1 |
| <i>circLIFR</i> | miR-29a-5p                          | 7 |
| <i>circLIFR</i> | miR-29b-2-5p                        | 1 |
| <i>circLIFR</i> | miR-30-3p                           | 3 |
| <i>circLIFR</i> | miR-301a-5p/301b-5p                 | 2 |
| <i>circLIFR</i> | miR-302a-5p                         | 2 |
| <i>circLIFR</i> | miR-302b-5p/302d-5p                 | 1 |
| <i>circLIFR</i> | miR-302c-3p.2/520-3p                | 1 |
| <i>circLIFR</i> | miR-302c-5p                         | 3 |
| <i>circLIFR</i> | miR-302f                            | 3 |
| <i>circLIFR</i> | miR-3064-3p                         | 1 |
| <i>circLIFR</i> | miR-3064-5p                         | 2 |

|                 |                                              |   |
|-----------------|----------------------------------------------|---|
| <i>circLIFR</i> | miR-3065-3p                                  | 5 |
| <i>circLIFR</i> | miR-3065-5p                                  | 2 |
| <i>circLIFR</i> | miR-3074-3p                                  | 1 |
| <i>circLIFR</i> | miR-3074-5p                                  | 2 |
| <i>circLIFR</i> | miR-30b-3p/1273h-5p/3689-3p/6779-5p/6780a-5p | 2 |
| <i>circLIFR</i> | miR-30c-3p/6788-5p                           | 2 |
| <i>circLIFR</i> | miR-3117-5p                                  | 2 |
| <i>circLIFR</i> | miR-3119                                     | 1 |
| <i>circLIFR</i> | miR-3120-3p                                  | 2 |
| <i>circLIFR</i> | miR-3121-3p                                  | 4 |
| <i>circLIFR</i> | miR-3121-5p                                  | 1 |
| <i>circLIFR</i> | miR-3122/3913-5p                             | 3 |
| <i>circLIFR</i> | miR-3124-3p                                  | 2 |
| <i>circLIFR</i> | miR-3125/3916/6859-5p                        | 2 |
| <i>circLIFR</i> | miR-3126-3p                                  | 1 |
| <i>circLIFR</i> | miR-3126-5p                                  | 3 |
| <i>circLIFR</i> | miR-3127-3p/6756-3p                          | 1 |
| <i>circLIFR</i> | miR-3128                                     | 1 |
| <i>circLIFR</i> | miR-3129-3p/5583-5p                          | 3 |
| <i>circLIFR</i> | miR-3130-3p                                  | 2 |
| <i>circLIFR</i> | miR-3130-5p/4482-5p                          | 2 |
| <i>circLIFR</i> | miR-3133                                     | 4 |
| <i>circLIFR</i> | miR-3134                                     | 2 |
| <i>circLIFR</i> | miR-3135b                                    | 2 |
| <i>circLIFR</i> | miR-3136-3p/7155-3p                          | 1 |
| <i>circLIFR</i> | miR-3136-5p/4439                             | 2 |
| <i>circLIFR</i> | miR-3137                                     | 1 |
| <i>circLIFR</i> | miR-3138                                     | 1 |
| <i>circLIFR</i> | miR-3140-3p                                  | 2 |
| <i>circLIFR</i> | miR-3140-5p                                  | 2 |
| <i>circLIFR</i> | miR-3143                                     | 2 |
| <i>circLIFR</i> | miR-3144-3p                                  | 1 |
| <i>circLIFR</i> | miR-3145-3p                                  | 5 |
| <i>circLIFR</i> | miR-3145-5p                                  | 2 |
| <i>circLIFR</i> | miR-3146                                     | 1 |
| <i>circLIFR</i> | miR-3147                                     | 2 |
| <i>circLIFR</i> | miR-3148                                     | 7 |
| <i>circLIFR</i> | miR-3150a-3p                                 | 1 |

|                 |                          |   |
|-----------------|--------------------------|---|
| <i>circLIFR</i> | miR-3150a-5p/3150b-5p    | 1 |
| <i>circLIFR</i> | miR-3150b-3p             | 1 |
| <i>circLIFR</i> | miR-3151-3p              | 4 |
| <i>circLIFR</i> | miR-3152-3p              | 1 |
| <i>circLIFR</i> | miR-3153/6733-5p/6739-5p | 3 |
| <i>circLIFR</i> | miR-3156-5p              | 3 |
| <i>circLIFR</i> | miR-3157-3p              | 1 |
| <i>circLIFR</i> | miR-3157-5p              | 2 |
| <i>circLIFR</i> | miR-3158-5p              | 2 |
| <i>circLIFR</i> | miR-3160-3p              | 2 |
| <i>circLIFR</i> | miR-3160-5p              | 1 |
| <i>circLIFR</i> | miR-3161                 | 2 |
| <i>circLIFR</i> | miR-3163                 | 7 |
| <i>circLIFR</i> | miR-3164                 | 2 |
| <i>circLIFR</i> | miR-3165                 | 3 |
| <i>circLIFR</i> | miR-3168                 | 4 |
| <i>circLIFR</i> | miR-3169                 | 3 |
| <i>circLIFR</i> | miR-3171                 | 1 |
| <i>circLIFR</i> | miR-3173-3p/6891-5p      | 2 |
| <i>circLIFR</i> | miR-3173-5p              | 1 |
| <i>circLIFR</i> | miR-3174                 | 2 |
| <i>circLIFR</i> | miR-3179                 | 2 |
| <i>circLIFR</i> | miR-3180-5p              | 4 |
| <i>circLIFR</i> | miR-3182                 | 1 |
| <i>circLIFR</i> | miR-3185                 | 6 |
| <i>circLIFR</i> | miR-3187-3p              | 1 |
| <i>circLIFR</i> | miR-3188                 | 2 |
| <i>circLIFR</i> | miR-3189-3p              | 1 |
| <i>circLIFR</i> | miR-3190-3p              | 8 |
| <i>circLIFR</i> | miR-3192-3p              | 2 |
| <i>circLIFR</i> | miR-3192-5p              | 1 |
| <i>circLIFR</i> | miR-3193                 | 1 |
| <i>circLIFR</i> | miR-3194-3p              | 2 |
| <i>circLIFR</i> | miR-3197                 | 1 |
| <i>circLIFR</i> | miR-3198/4309            | 6 |
| <i>circLIFR</i> | miR-3199/8052            | 1 |
| <i>circLIFR</i> | miR-32-3p                | 5 |
| <i>circLIFR</i> | miR-320                  | 2 |



|                 |                           |   |
|-----------------|---------------------------|---|
| <i>circLIFR</i> | miR-3201/4791             | 5 |
| <i>circLIFR</i> | miR-3202                  | 2 |
| <i>circLIFR</i> | miR-320e                  | 2 |
| <i>circLIFR</i> | miR-323-3p                | 1 |
| <i>circLIFR</i> | miR-323a-5p               | 1 |
| <i>circLIFR</i> | miR-323b-5p/410-5p/494-5p | 1 |
| <i>circLIFR</i> | miR-324-3p/1913           | 1 |
| <i>circLIFR</i> | miR-326                   | 4 |
| <i>circLIFR</i> | miR-329-5p                | 1 |
| <i>circLIFR</i> | miR-33-5p                 | 3 |
| <i>circLIFR</i> | miR-330-3p                | 3 |
| <i>circLIFR</i> | miR-330-3p.2              | 7 |
| <i>circLIFR</i> | miR-335-3p                | 2 |
| <i>circLIFR</i> | miR-335-5p                | 1 |
| <i>circLIFR</i> | miR-337-3p                | 1 |
| <i>circLIFR</i> | miR-338-5p                | 3 |
| <i>circLIFR</i> | miR-339-5p                | 2 |
| <i>circLIFR</i> | miR-33a-3p                | 3 |
| <i>circLIFR</i> | miR-34-5p/449-5p          | 1 |
| <i>circLIFR</i> | miR-342-3p                | 1 |
| <i>circLIFR</i> | miR-345-3p                | 2 |
| <i>circLIFR</i> | miR-346                   | 1 |
| <i>circLIFR</i> | miR-34a-3p                | 6 |
| <i>circLIFR</i> | miR-34b-3p                | 2 |
| <i>circLIFR</i> | miR-34b-5p/449c-5p        | 1 |
| <i>circLIFR</i> | miR-34c-3p                | 2 |
| <i>circLIFR</i> | miR-3529-3p               | 5 |
| <i>circLIFR</i> | miR-3591-5p               | 1 |
| <i>circLIFR</i> | miR-3605-3p               | 1 |
| <i>circLIFR</i> | miR-3605-5p               | 2 |
| <i>circLIFR</i> | miR-3606-5p               | 2 |
| <i>circLIFR</i> | miR-3607-3p               | 2 |
| <i>circLIFR</i> | miR-3607-5p               | 2 |
| <i>circLIFR</i> | miR-361-5p                | 4 |
| <i>circLIFR</i> | miR-3611                  | 3 |
| <i>circLIFR</i> | miR-3612                  | 2 |
| <i>circLIFR</i> | miR-3614-5p               | 1 |
| <i>circLIFR</i> | miR-3617-3p               | 6 |

|                 |                       |   |
|-----------------|-----------------------|---|
| <i>circLIFR</i> | miR-362-5p/500b-5p    | 2 |
| <i>circLIFR</i> | miR-3620-3p           | 1 |
| <i>circLIFR</i> | miR-3621              | 1 |
| <i>circLIFR</i> | miR-3622a-3p/3622b-3p | 4 |
| <i>circLIFR</i> | miR-363-5p/6745       | 1 |
| <i>circLIFR</i> | miR-3646              | 5 |
| <i>circLIFR</i> | miR-3652/4430         | 1 |
| <i>circLIFR</i> | miR-3653-3p           | 7 |
| <i>circLIFR</i> | miR-3654              | 3 |
| <i>circLIFR</i> | miR-3655              | 1 |
| <i>circLIFR</i> | miR-3656              | 1 |
| <i>circLIFR</i> | miR-3657              | 1 |
| <i>circLIFR</i> | miR-3658              | 5 |
| <i>circLIFR</i> | miR-3659              | 1 |
| <i>circLIFR</i> | miR-365a-5p/365b-5p   | 1 |
| <i>circLIFR</i> | miR-3660/4526         | 6 |
| <i>circLIFR</i> | miR-3662              | 3 |
| <i>circLIFR</i> | miR-3663-5p           | 3 |
| <i>circLIFR</i> | miR-3664-3p           | 1 |
| <i>circLIFR</i> | miR-3664-5p           | 1 |
| <i>circLIFR</i> | miR-3667-3p           | 2 |
| <i>circLIFR</i> | miR-3668              | 4 |
| <i>circLIFR</i> | miR-367-5p            | 2 |
| <i>circLIFR</i> | miR-3670              | 2 |
| <i>circLIFR</i> | miR-3671              | 3 |
| <i>circLIFR</i> | miR-3672/6864-3p      | 1 |
| <i>circLIFR</i> | miR-3674              | 1 |
| <i>circLIFR</i> | miR-3675-5p           | 1 |
| <i>circLIFR</i> | miR-3677-5p           | 5 |
| <i>circLIFR</i> | miR-3678-3p           | 5 |
| <i>circLIFR</i> | miR-3679-3p           | 1 |
| <i>circLIFR</i> | miR-3680-3p           | 6 |
| <i>circLIFR</i> | miR-3681-5p           | 4 |
| <i>circLIFR</i> | miR-3682-3p           | 2 |
| <i>circLIFR</i> | miR-3682-5p           | 3 |
| <i>circLIFR</i> | miR-3683              | 1 |
| <i>circLIFR</i> | miR-3685              | 2 |
| <i>circLIFR</i> | miR-3688-3p           | 5 |

|                 |                                   |   |
|-----------------|-----------------------------------|---|
| <i>circLIFR</i> | miR-3688-5p                       | 1 |
| <i>circLIFR</i> | miR-3689a-5p/3689b-5p/3689e/3689f | 1 |
| <i>circLIFR</i> | miR-3689d/6851-5p                 | 1 |
| <i>circLIFR</i> | miR-369-5p                        | 1 |
| <i>circLIFR</i> | miR-3690                          | 1 |
| <i>circLIFR</i> | miR-3692-3p                       | 1 |
| <i>circLIFR</i> | miR-3692-5p                       | 1 |
| <i>circLIFR</i> | miR-371-5p                        | 3 |
| <i>circLIFR</i> | miR-3713                          | 1 |
| <i>circLIFR</i> | miR-371b-5p/373-5p/616-5p         | 3 |
| <i>circLIFR</i> | miR-372-5p                        | 3 |
| <i>circLIFR</i> | miR-374-5p                        | 2 |
| <i>circLIFR</i> | miR-374-5p/655-3p                 | 1 |
| <i>circLIFR</i> | miR-374a-3p                       | 4 |
| <i>circLIFR</i> | miR-375                           | 3 |
| <i>circLIFR</i> | miR-376b-5p/376c-5p               | 2 |
| <i>circLIFR</i> | miR-377-3p                        | 1 |
| <i>circLIFR</i> | miR-377-5p/6086                   | 1 |
| <i>circLIFR</i> | miR-378-3p                        | 1 |
| <i>circLIFR</i> | miR-378a-5p                       | 1 |
| <i>circLIFR</i> | miR-378g                          | 2 |
| <i>circLIFR</i> | miR-378j/6839-5p                  | 2 |
| <i>circLIFR</i> | miR-379-5p                        | 1 |
| <i>circLIFR</i> | miR-380-3p                        | 4 |
| <i>circLIFR</i> | miR-380-5p/563                    | 1 |
| <i>circLIFR</i> | miR-381-3p                        | 1 |
| <i>circLIFR</i> | miR-382-3p                        | 1 |
| <i>circLIFR</i> | miR-382-5p                        | 2 |
| <i>circLIFR</i> | miR-383-3p                        | 5 |
| <i>circLIFR</i> | miR-383-5p.1                      | 1 |
| <i>circLIFR</i> | miR-383-5p.2                      | 1 |
| <i>circLIFR</i> | miR-384                           | 2 |
| <i>circLIFR</i> | miR-3907                          | 1 |
| <i>circLIFR</i> | miR-3908                          | 2 |
| <i>circLIFR</i> | miR-3911                          | 3 |
| <i>circLIFR</i> | miR-3912-5p                       | 1 |
| <i>circLIFR</i> | miR-3914                          | 1 |
| <i>circLIFR</i> | miR-3915                          | 5 |

|                 |                     |    |
|-----------------|---------------------|----|
| <i>circLIFR</i> | miR-3919            | 3  |
| <i>circLIFR</i> | miR-3920            | 6  |
| <i>circLIFR</i> | miR-3921/4653-5p    | 2  |
| <i>circLIFR</i> | miR-3922-5p         | 1  |
| <i>circLIFR</i> | miR-3924            | 4  |
| <i>circLIFR</i> | miR-3925-3p         | 3  |
| <i>circLIFR</i> | miR-3926            | 1  |
| <i>circLIFR</i> | miR-3928-3p         | 3  |
| <i>circLIFR</i> | miR-3928-5p/6806-3p | 2  |
| <i>circLIFR</i> | miR-3929/4419b/4478 | 1  |
| <i>circLIFR</i> | miR-3934-3p         | 1  |
| <i>circLIFR</i> | miR-3934-5p         | 1  |
| <i>circLIFR</i> | miR-3936            | 2  |
| <i>circLIFR</i> | miR-3938            | 1  |
| <i>circLIFR</i> | miR-3942-3p         | 1  |
| <i>circLIFR</i> | miR-3942-5p         | 2  |
| <i>circLIFR</i> | miR-3945            | 1  |
| <i>circLIFR</i> | miR-3973            | 2  |
| <i>circLIFR</i> | miR-3975            | 2  |
| <i>circLIFR</i> | miR-3977            | 2  |
| <i>circLIFR</i> | miR-3978            | 12 |
| <i>circLIFR</i> | miR-409-3p          | 2  |
| <i>circLIFR</i> | miR-409-5p          | 1  |
| <i>circLIFR</i> | miR-410-3p          | 3  |
| <i>circLIFR</i> | miR-411-3p          | 5  |
| <i>circLIFR</i> | miR-411-5p.1        | 1  |
| <i>circLIFR</i> | miR-412-3p/6754-3p  | 1  |
| <i>circLIFR</i> | miR-412-5p          | 1  |
| <i>circLIFR</i> | miR-421             | 4  |
| <i>circLIFR</i> | miR-423-5p          | 1  |
| <i>circLIFR</i> | miR-424-3p          | 1  |
| <i>circLIFR</i> | miR-4251            | 2  |
| <i>circLIFR</i> | miR-4253/6862-5p    | 1  |
| <i>circLIFR</i> | miR-4254            | 1  |
| <i>circLIFR</i> | miR-4255            | 4  |
| <i>circLIFR</i> | miR-4256            | 3  |
| <i>circLIFR</i> | miR-4258            | 1  |
| <i>circLIFR</i> | miR-4259            | 4  |

|                 |                                    |   |
|-----------------|------------------------------------|---|
| <i>circLIFR</i> | miR-4261                           | 4 |
| <i>circLIFR</i> | miR-4263                           | 1 |
| <i>circLIFR</i> | miR-4265/4296/4322                 | 3 |
| <i>circLIFR</i> | miR-4266                           | 2 |
| <i>circLIFR</i> | miR-4267                           | 3 |
| <i>circLIFR</i> | miR-4268                           | 3 |
| <i>circLIFR</i> | miR-4269/6715b-5p                  | 1 |
| <i>circLIFR</i> | miR-4271/4725-3p/6780b-5p          | 1 |
| <i>circLIFR</i> | miR-4272                           | 3 |
| <i>circLIFR</i> | miR-4273/7156-5p                   | 5 |
| <i>circLIFR</i> | miR-4274                           | 2 |
| <i>circLIFR</i> | miR-4275                           | 2 |
| <i>circLIFR</i> | miR-4279                           | 3 |
| <i>circLIFR</i> | miR-4282                           | 9 |
| <i>circLIFR</i> | miR-4283                           | 1 |
| <i>circLIFR</i> | miR-4284                           | 3 |
| <i>circLIFR</i> | miR-4289                           | 2 |
| <i>circLIFR</i> | miR-4291                           | 5 |
| <i>circLIFR</i> | miR-4293                           | 2 |
| <i>circLIFR</i> | miR-4302                           | 1 |
| <i>circLIFR</i> | miR-4307                           | 2 |
| <i>circLIFR</i> | miR-431-5p                         | 2 |
| <i>circLIFR</i> | miR-4310/7157-5p                   | 1 |
| <i>circLIFR</i> | miR-4311                           | 4 |
| <i>circLIFR</i> | miR-4314                           | 1 |
| <i>circLIFR</i> | miR-4317                           | 1 |
| <i>circLIFR</i> | miR-4318                           | 1 |
| <i>circLIFR</i> | miR-432-3p                         | 4 |
| <i>circLIFR</i> | miR-432-5p                         | 6 |
| <i>circLIFR</i> | miR-4320                           | 2 |
| <i>circLIFR</i> | miR-4325                           | 1 |
| <i>circLIFR</i> | miR-4328                           | 4 |
| <i>circLIFR</i> | miR-4329                           | 2 |
| <i>circLIFR</i> | miR-433-3p                         | 4 |
| <i>circLIFR</i> | miR-4330                           | 4 |
| <i>circLIFR</i> | miR-4417                           | 5 |
| <i>circLIFR</i> | miR-4419a/4510/6127/6129/6130/6133 | 3 |
| <i>circLIFR</i> | miR-4422                           | 7 |

|                 |                     |   |
|-----------------|---------------------|---|
| <i>circLIFR</i> | miR-4425            | 2 |
| <i>circLIFR</i> | miR-4426/4647/4662b | 2 |
| <i>circLIFR</i> | miR-4427            | 2 |
| <i>circLIFR</i> | miR-4428            | 2 |
| <i>circLIFR</i> | miR-4432            | 2 |
| <i>circLIFR</i> | miR-4433a-3p        | 1 |
| <i>circLIFR</i> | miR-4433b-3p        | 1 |
| <i>circLIFR</i> | miR-4434/4516/5703  | 7 |
| <i>circLIFR</i> | miR-4435            | 1 |
| <i>circLIFR</i> | miR-4437            | 5 |
| <i>circLIFR</i> | miR-4438            | 3 |
| <i>circLIFR</i> | miR-4443            | 3 |
| <i>circLIFR</i> | miR-4445-5p         | 1 |
| <i>circLIFR</i> | miR-4446-5p         | 1 |
| <i>circLIFR</i> | miR-4448            | 3 |
| <i>circLIFR</i> | miR-4449            | 2 |
| <i>circLIFR</i> | miR-4450            | 1 |
| <i>circLIFR</i> | miR-4451            | 1 |
| <i>circLIFR</i> | miR-4452            | 3 |
| <i>circLIFR</i> | miR-4459            | 1 |
| <i>circLIFR</i> | miR-4460            | 3 |
| <i>circLIFR</i> | miR-4461            | 1 |
| <i>circLIFR</i> | miR-4464/4748       | 1 |
| <i>circLIFR</i> | miR-4468            | 1 |
| <i>circLIFR</i> | miR-4470            | 1 |
| <i>circLIFR</i> | miR-4474-5p         | 1 |
| <i>circLIFR</i> | miR-4475            | 1 |
| <i>circLIFR</i> | miR-4476/6876-5p    | 3 |
| <i>circLIFR</i> | miR-4477a           | 3 |
| <i>circLIFR</i> | miR-4481/4745-5p    | 5 |
| <i>circLIFR</i> | miR-4482-3p         | 1 |
| <i>circLIFR</i> | miR-4486            | 2 |
| <i>circLIFR</i> | miR-4487            | 2 |
| <i>circLIFR</i> | miR-4489            | 1 |
| <i>circLIFR</i> | miR-4490            | 1 |
| <i>circLIFR</i> | miR-4491/4657       | 3 |
| <i>circLIFR</i> | miR-4494            | 2 |
| <i>circLIFR</i> | miR-4495            | 1 |

|                 |                     |   |
|-----------------|---------------------|---|
| <i>circLIFR</i> | miR-4496            | 5 |
| <i>circLIFR</i> | miR-449c-3p         | 1 |
| <i>circLIFR</i> | miR-4501            | 2 |
| <i>circLIFR</i> | miR-4502            | 2 |
| <i>circLIFR</i> | miR-4504            | 4 |
| <i>circLIFR</i> | miR-4505/5787       | 1 |
| <i>circLIFR</i> | miR-4506            | 1 |
| <i>circLIFR</i> | miR-4508            | 1 |
| <i>circLIFR</i> | miR-4509            | 2 |
| <i>circLIFR</i> | miR-450a-1-3p       | 3 |
| <i>circLIFR</i> | miR-450b-3p/769-3p  | 2 |
| <i>circLIFR</i> | miR-450b-5p         | 6 |
| <i>circLIFR</i> | miR-451             | 1 |
| <i>circLIFR</i> | miR-4511            | 3 |
| <i>circLIFR</i> | miR-4513/6855-3p    | 1 |
| <i>circLIFR</i> | miR-4514/4692       | 1 |
| <i>circLIFR</i> | miR-4515            | 4 |
| <i>circLIFR</i> | miR-4517            | 1 |
| <i>circLIFR</i> | miR-4519            | 2 |
| <i>circLIFR</i> | miR-451b            | 1 |
| <i>circLIFR</i> | miR-452-5p/892-3p   | 4 |
| <i>circLIFR</i> | miR-4520-3p         | 2 |
| <i>circLIFR</i> | miR-4521            | 1 |
| <i>circLIFR</i> | miR-4522            | 2 |
| <i>circLIFR</i> | miR-4524a-3p        | 2 |
| <i>circLIFR</i> | miR-4524b-3p        | 1 |
| <i>circLIFR</i> | miR-4528            | 1 |
| <i>circLIFR</i> | miR-4529-5p         | 1 |
| <i>circLIFR</i> | miR-4531            | 4 |
| <i>circLIFR</i> | miR-4532            | 1 |
| <i>circLIFR</i> | miR-4533            | 2 |
| <i>circLIFR</i> | miR-4534/8082       | 2 |
| <i>circLIFR</i> | miR-4536-5p         | 2 |
| <i>circLIFR</i> | miR-4540            | 1 |
| <i>circLIFR</i> | miR-455-3p.1        | 2 |
| <i>circLIFR</i> | miR-455-3p.2        | 2 |
| <i>circLIFR</i> | miR-455-5p          | 2 |
| <i>circLIFR</i> | miR-4633-3p/6500-5p | 2 |

|                 |                       |   |
|-----------------|-----------------------|---|
| <i>circLIFR</i> | miR-4633-5p           | 1 |
| <i>circLIFR</i> | miR-4635              | 2 |
| <i>circLIFR</i> | miR-4636              | 1 |
| <i>circLIFR</i> | miR-4637              | 3 |
| <i>circLIFR</i> | miR-4638-3p           | 1 |
| <i>circLIFR</i> | miR-4639-3p           | 1 |
| <i>circLIFR</i> | miR-4642              | 2 |
| <i>circLIFR</i> | miR-4643              | 2 |
| <i>circLIFR</i> | miR-4645-5p/4673      | 1 |
| <i>circLIFR</i> | miR-4646-3p           | 1 |
| <i>circLIFR</i> | miR-4648              | 1 |
| <i>circLIFR</i> | miR-4649-3p           | 1 |
| <i>circLIFR</i> | miR-4649-5p/6729-5p   | 1 |
| <i>circLIFR</i> | miR-4650-3p           | 1 |
| <i>circLIFR</i> | miR-4650-5p           | 4 |
| <i>circLIFR</i> | miR-4652-3p           | 3 |
| <i>circLIFR</i> | miR-4653-3p           | 2 |
| <i>circLIFR</i> | miR-4654/4769-5p      | 1 |
| <i>circLIFR</i> | miR-4659a-3p/4659b-3p | 2 |
| <i>circLIFR</i> | miR-4659a-5p/4659b-5p | 2 |
| <i>circLIFR</i> | miR-466               | 1 |
| <i>circLIFR</i> | miR-4662a-3p          | 6 |
| <i>circLIFR</i> | miR-4663              | 2 |
| <i>circLIFR</i> | miR-4666a-3p          | 1 |
| <i>circLIFR</i> | miR-4666a-5p          | 4 |
| <i>circLIFR</i> | miR-4666b             | 1 |
| <i>circLIFR</i> | miR-4667-3p           | 1 |
| <i>circLIFR</i> | miR-4668-5p           | 3 |
| <i>circLIFR</i> | miR-4669              | 1 |
| <i>circLIFR</i> | miR-4670-3p           | 6 |
| <i>circLIFR</i> | miR-4671-5p           | 1 |
| <i>circLIFR</i> | miR-4674              | 3 |
| <i>circLIFR</i> | miR-4677-3p           | 3 |
| <i>circLIFR</i> | miR-4677-5p           | 5 |
| <i>circLIFR</i> | miR-4678              | 1 |
| <i>circLIFR</i> | miR-4679              | 3 |
| <i>circLIFR</i> | miR-4680-3p           | 2 |
| <i>circLIFR</i> | miR-4684-3p           | 4 |



|                 |                             |   |
|-----------------|-----------------------------|---|
| <i>circLIFR</i> | miR-4684-5p                 | 2 |
| <i>circLIFR</i> | miR-4686                    | 1 |
| <i>circLIFR</i> | miR-4687-3p                 | 2 |
| <i>circLIFR</i> | miR-4687-5p                 | 1 |
| <i>circLIFR</i> | miR-4688/6743-5p            | 2 |
| <i>circLIFR</i> | miR-4689/6858-5p            | 5 |
| <i>circLIFR</i> | miR-4691-3p                 | 1 |
| <i>circLIFR</i> | miR-4691-5p/6792-3p         | 1 |
| <i>circLIFR</i> | miR-4693-3p                 | 2 |
| <i>circLIFR</i> | miR-4693-5p                 | 2 |
| <i>circLIFR</i> | miR-4694-3p                 | 4 |
| <i>circLIFR</i> | miR-4695-3p                 | 1 |
| <i>circLIFR</i> | miR-4695-5p                 | 3 |
| <i>circLIFR</i> | miR-4696                    | 1 |
| <i>circLIFR</i> | miR-4697-3p                 | 1 |
| <i>circLIFR</i> | miR-4698                    | 3 |
| <i>circLIFR</i> | miR-4699-3p                 | 4 |
| <i>circLIFR</i> | miR-4699-5p                 | 4 |
| <i>circLIFR</i> | miR-4700-3p                 | 1 |
| <i>circLIFR</i> | miR-4703-3p                 | 2 |
| <i>circLIFR</i> | miR-4704-3p                 | 1 |
| <i>circLIFR</i> | miR-4704-5p                 | 1 |
| <i>circLIFR</i> | miR-4705                    | 3 |
| <i>circLIFR</i> | miR-4709-3p                 | 3 |
| <i>circLIFR</i> | miR-4709-5p                 | 4 |
| <i>circLIFR</i> | miR-4711-3p                 | 2 |
| <i>circLIFR</i> | miR-4713-3p                 | 1 |
| <i>circLIFR</i> | miR-4713-5p                 | 1 |
| <i>circLIFR</i> | miR-4714-3p                 | 1 |
| <i>circLIFR</i> | miR-4714-5p                 | 1 |
| <i>circLIFR</i> | miR-4715-5p                 | 4 |
| <i>circLIFR</i> | miR-4716-5p                 | 1 |
| <i>circLIFR</i> | miR-4717-3p                 | 4 |
| <i>circLIFR</i> | miR-4717-5p                 | 1 |
| <i>circLIFR</i> | miR-4718                    | 1 |
| <i>circLIFR</i> | miR-4719                    | 3 |
| <i>circLIFR</i> | miR-4720-5p/4799-3p/5588-5p | 1 |
| <i>circLIFR</i> | miR-4722-5p                 | 1 |

|                 |                     |   |
|-----------------|---------------------|---|
| <i>circLIFR</i> | miR-4724-3p         | 1 |
| <i>circLIFR</i> | miR-4724-5p         | 5 |
| <i>circLIFR</i> | miR-4725-5p         | 2 |
| <i>circLIFR</i> | miR-4726-3p         | 1 |
| <i>circLIFR</i> | miR-4727-3p         | 3 |
| <i>circLIFR</i> | miR-4727-5p         | 1 |
| <i>circLIFR</i> | miR-4729            | 5 |
| <i>circLIFR</i> | miR-4730            | 1 |
| <i>circLIFR</i> | miR-4731-3p/4801    | 1 |
| <i>circLIFR</i> | miR-4731-5p         | 1 |
| <i>circLIFR</i> | miR-4732-3p         | 3 |
| <i>circLIFR</i> | miR-4732-5p         | 1 |
| <i>circLIFR</i> | miR-4733-3p         | 1 |
| <i>circLIFR</i> | miR-4733-5p         | 5 |
| <i>circLIFR</i> | miR-4734            | 1 |
| <i>circLIFR</i> | miR-4735-5p         | 1 |
| <i>circLIFR</i> | miR-4736            | 2 |
| <i>circLIFR</i> | miR-4737            | 2 |
| <i>circLIFR</i> | miR-4738-3p         | 3 |
| <i>circLIFR</i> | miR-4740-5p         | 4 |
| <i>circLIFR</i> | miR-4742-3p         | 1 |
| <i>circLIFR</i> | miR-4742-5p         | 1 |
| <i>circLIFR</i> | miR-4743-3p         | 3 |
| <i>circLIFR</i> | miR-4743-5p         | 1 |
| <i>circLIFR</i> | miR-4744            | 2 |
| <i>circLIFR</i> | miR-4746-3p         | 1 |
| <i>circLIFR</i> | miR-4747-5p/5196-5p | 2 |
| <i>circLIFR</i> | miR-4749-3p         | 1 |
| <i>circLIFR</i> | miR-4751            | 2 |
| <i>circLIFR</i> | miR-4752            | 6 |
| <i>circLIFR</i> | miR-4755-5p/5006-3p | 1 |
| <i>circLIFR</i> | miR-4756-3p         | 3 |
| <i>circLIFR</i> | miR-4757-5p/6744-3p | 1 |
| <i>circLIFR</i> | miR-4759            | 3 |
| <i>circLIFR</i> | miR-4760-3p         | 6 |
| <i>circLIFR</i> | miR-4760-5p/8061    | 2 |
| <i>circLIFR</i> | miR-4761-5p         | 2 |
| <i>circLIFR</i> | miR-4762-3p         | 6 |

|                 |                     |   |
|-----------------|---------------------|---|
| <i>circLIFR</i> | miR-4762-5p         | 2 |
| <i>circLIFR</i> | miR-4764-3p         | 1 |
| <i>circLIFR</i> | miR-4764-5p         | 1 |
| <i>circLIFR</i> | miR-4765            | 2 |
| <i>circLIFR</i> | miR-4766-5p         | 7 |
| <i>circLIFR</i> | miR-4767            | 1 |
| <i>circLIFR</i> | miR-4768-3p         | 1 |
| <i>circLIFR</i> | miR-4768-5p/6833-3p | 2 |
| <i>circLIFR</i> | miR-4772-3p         | 1 |
| <i>circLIFR</i> | miR-4772-5p         | 1 |
| <i>circLIFR</i> | miR-4773            | 4 |
| <i>circLIFR</i> | miR-4774-5p         | 1 |
| <i>circLIFR</i> | miR-4775            | 6 |
| <i>circLIFR</i> | miR-4776-3p         | 1 |
| <i>circLIFR</i> | miR-4778-5p         | 2 |
| <i>circLIFR</i> | miR-4779            | 3 |
| <i>circLIFR</i> | miR-4780            | 2 |
| <i>circLIFR</i> | miR-4781-3p         | 2 |
| <i>circLIFR</i> | miR-4782-5p/5706    | 6 |
| <i>circLIFR</i> | miR-4786-3p         | 2 |
| <i>circLIFR</i> | miR-4789-3p         | 2 |
| <i>circLIFR</i> | miR-4789-5p         | 2 |
| <i>circLIFR</i> | miR-4790-3p         | 3 |
| <i>circLIFR</i> | miR-4793-3p         | 2 |
| <i>circLIFR</i> | miR-4793-5p         | 2 |
| <i>circLIFR</i> | miR-4795-3p         | 1 |
| <i>circLIFR</i> | miR-4795-5p         | 3 |
| <i>circLIFR</i> | miR-4796-3p         | 5 |
| <i>circLIFR</i> | miR-4799-5p         | 2 |
| <i>circLIFR</i> | miR-4800-5p         | 1 |
| <i>circLIFR</i> | miR-4802-3p         | 3 |
| <i>circLIFR</i> | miR-4802-5p         | 5 |
| <i>circLIFR</i> | miR-4803            | 1 |
| <i>circLIFR</i> | miR-483-3p.1        | 2 |
| <i>circLIFR</i> | miR-483-3p.2        | 1 |
| <i>circLIFR</i> | miR-484/3155        | 1 |
| <i>circLIFR</i> | miR-485-5p          | 2 |
| <i>circLIFR</i> | miR-486-3p          | 1 |

|                 |                     |   |
|-----------------|---------------------|---|
| <i>circLIFR</i> | miR-486-5p          | 3 |
| <i>circLIFR</i> | miR-488-3p          | 2 |
| <i>circLIFR</i> | miR-488-5p          | 3 |
| <i>circLIFR</i> | miR-489-3p          | 6 |
| <i>circLIFR</i> | miR-490-5p          | 1 |
| <i>circLIFR</i> | miR-494-3p          | 2 |
| <i>circLIFR</i> | miR-495-3p          | 3 |
| <i>circLIFR</i> | miR-495-5p          | 2 |
| <i>circLIFR</i> | miR-496.1           | 5 |
| <i>circLIFR</i> | miR-496.2           | 2 |
| <i>circLIFR</i> | miR-497-3p          | 2 |
| <i>circLIFR</i> | miR-498             | 5 |
| <i>circLIFR</i> | miR-4999-3p         | 1 |
| <i>circLIFR</i> | miR-4999-5p         | 1 |
| <i>circLIFR</i> | miR-499a-3p/499b-3p | 3 |
| <i>circLIFR</i> | miR-499b-5p         | 2 |
| <i>circLIFR</i> | miR-5000-3p         | 1 |
| <i>circLIFR</i> | miR-5001-3p         | 1 |
| <i>circLIFR</i> | miR-5002-3p         | 3 |
| <i>circLIFR</i> | miR-5002-5p         | 2 |
| <i>circLIFR</i> | miR-5003-3p         | 2 |
| <i>circLIFR</i> | miR-5003-5p         | 2 |
| <i>circLIFR</i> | miR-5004-3p         | 2 |
| <i>circLIFR</i> | miR-5004-5p         | 2 |
| <i>circLIFR</i> | miR-5009-3p         | 4 |
| <i>circLIFR</i> | miR-5009-5p/8058    | 1 |
| <i>circLIFR</i> | miR-500a-3p         | 2 |
| <i>circLIFR</i> | miR-500a-5p         | 2 |
| <i>circLIFR</i> | miR-500b-3p         | 2 |
| <i>circLIFR</i> | miR-501-3p/502-3p   | 1 |
| <i>circLIFR</i> | miR-501-5p          | 2 |
| <i>circLIFR</i> | miR-5010-3p         | 2 |
| <i>circLIFR</i> | miR-5011-3p         | 1 |
| <i>circLIFR</i> | miR-5011-5p         | 2 |
| <i>circLIFR</i> | miR-502-5p          | 1 |
| <i>circLIFR</i> | miR-504-5p.1        | 3 |
| <i>circLIFR</i> | miR-505-3p.2        | 4 |
| <i>circLIFR</i> | miR-505-5p          | 1 |

|                 |                             |   |
|-----------------|-----------------------------|---|
| <i>circLIFR</i> | miR-506-5p                  | 1 |
| <i>circLIFR</i> | miR-507/557                 | 6 |
| <i>circLIFR</i> | miR-508-3p                  | 1 |
| <i>circLIFR</i> | miR-508-5p                  | 2 |
| <i>circLIFR</i> | miR-5089-3p                 | 3 |
| <i>circLIFR</i> | miR-5089-5p                 | 2 |
| <i>circLIFR</i> | miR-509-3-5p/509-5p/4418    | 2 |
| <i>circLIFR</i> | miR-509-3p                  | 3 |
| <i>circLIFR</i> | miR-5090/6775-5p            | 1 |
| <i>circLIFR</i> | miR-5091                    | 2 |
| <i>circLIFR</i> | miR-5092                    | 2 |
| <i>circLIFR</i> | miR-5093                    | 6 |
| <i>circLIFR</i> | miR-5094                    | 2 |
| <i>circLIFR</i> | miR-5096                    | 2 |
| <i>circLIFR</i> | miR-510-3p                  | 5 |
| <i>circLIFR</i> | miR-510-5p                  | 1 |
| <i>circLIFR</i> | miR-5100                    | 3 |
| <i>circLIFR</i> | miR-512-3p                  | 1 |
| <i>circLIFR</i> | miR-512-5p                  | 1 |
| <i>circLIFR</i> | miR-513a-3p/513c-3p/3606-3p | 3 |
| <i>circLIFR</i> | miR-513b-3p                 | 2 |
| <i>circLIFR</i> | miR-513b-5p                 | 4 |
| <i>circLIFR</i> | miR-513c-5p/514b-5p         | 3 |
| <i>circLIFR</i> | miR-514a-3p                 | 1 |
| <i>circLIFR</i> | miR-514a-5p                 | 1 |
| <i>circLIFR</i> | miR-515-5p/519e-5p          | 1 |
| <i>circLIFR</i> | miR-516a-3p/516b-3p/7162-5p | 1 |
| <i>circLIFR</i> | miR-516a-5p                 | 1 |
| <i>circLIFR</i> | miR-516b-5p                 | 6 |
| <i>circLIFR</i> | miR-5186                    | 1 |
| <i>circLIFR</i> | miR-5187-3p                 | 2 |
| <i>circLIFR</i> | miR-5187-5p                 | 1 |
| <i>circLIFR</i> | miR-5188                    | 1 |
| <i>circLIFR</i> | miR-518a-5p/527             | 1 |
| <i>circLIFR</i> | miR-518c-5p                 | 4 |
| <i>circLIFR</i> | miR-5190                    | 2 |
| <i>circLIFR</i> | miR-5192                    | 1 |
| <i>circLIFR</i> | miR-5193                    | 1 |

|                 |                                                                    |   |
|-----------------|--------------------------------------------------------------------|---|
| <i>circLIFR</i> | miR-5194                                                           | 1 |
| <i>circLIFR</i> | miR-5195-5p                                                        | 1 |
| <i>circLIFR</i> | miR-5196-3p                                                        | 2 |
| <i>circLIFR</i> | miR-5197-3p                                                        | 9 |
| <i>circLIFR</i> | miR-5197-5p                                                        | 1 |
| <i>circLIFR</i> | miR-520g-3p                                                        | 2 |
| <i>circLIFR</i> | miR-522-3p                                                         | 4 |
| <i>circLIFR</i> | miR-524-5p                                                         | 3 |
| <i>circLIFR</i> | miR-525-5p                                                         | 4 |
| <i>circLIFR</i> | miR-526b-5p                                                        | 2 |
| <i>circLIFR</i> | miR-532-3p                                                         | 1 |
| <i>circLIFR</i> | miR-532-5p                                                         | 1 |
| <i>circLIFR</i> | miR-539-5p                                                         | 4 |
| <i>circLIFR</i> | miR-541-5p                                                         | 2 |
| <i>circLIFR</i> | miR-542-3p                                                         | 4 |
| <i>circLIFR</i> | miR-543                                                            | 7 |
| <i>circLIFR</i> | miR-544a                                                           | 2 |
| <i>circLIFR</i> | miR-545-3p                                                         | 4 |
| <i>circLIFR</i> | miR-548ac/548bb-3p/548d-3p/548h-3p/548z                            | 1 |
| <i>circLIFR</i> | miR-548ad-3p                                                       | 1 |
| <i>circLIFR</i> | miR-548ah-5p/3609                                                  | 5 |
| <i>circLIFR</i> | miR-548ai/548ag/548ba/570-5p                                       | 2 |
| <i>circLIFR</i> | miR-548aj-5p/548f-5p/548g-5p/548x-5p                               | 1 |
| <i>circLIFR</i> | miR-548ao-5p/548ax                                                 | 1 |
| <i>circLIFR</i> | miR-548ap-3p/548aa/548t-3p                                         | 4 |
| <i>circLIFR</i> | miR-548aq-3p/548am-3p/548aj-3p/548ah-3p/548ae-3p/548j-3p/548x-3p   | 3 |
| <i>circLIFR</i> | miR-548as-3p                                                       | 4 |
| <i>circLIFR</i> | miR-548at-5p                                                       | 5 |
| <i>circLIFR</i> | miR-548au-3p                                                       | 1 |
| <i>circLIFR</i> | miR-548av-3p                                                       | 4 |
| <i>circLIFR</i> | miR-548av-5p/548k/8054                                             | 1 |
| <i>circLIFR</i> | miR-548aw                                                          | 1 |
| <i>circLIFR</i> | miR-548ay-3p/548at-3p                                              | 4 |
| <i>circLIFR</i> | miR-548ay-5p/548au-5p/548as-5p/548ar-5p/548aq-5p/548ap-5p/548am-5p | 5 |
| <i>circLIFR</i> | miR-548az-3p/548ar-3p/548a-3p/548e-3p/548f-3p                      | 3 |
| <i>circLIFR</i> | miR-548az-5p/548t-5p                                               | 5 |
| <i>circLIFR</i> | miR-548b-3p                                                        | 3 |
| <i>circLIFR</i> | miR-548c-3p                                                        | 4 |

|                 |               |   |
|-----------------|---------------|---|
| <i>circLIFR</i> | miR-548e-5p   | 2 |
| <i>circLIFR</i> | miR-548l      | 1 |
| <i>circLIFR</i> | miR-548n      | 5 |
| <i>circLIFR</i> | miR-548p      | 2 |
| <i>circLIFR</i> | miR-548s      | 1 |
| <i>circLIFR</i> | miR-548v      | 4 |
| <i>circLIFR</i> | miR-550b-2-5p | 1 |
| <i>circLIFR</i> | miR-550b-3p   | 1 |
| <i>circLIFR</i> | miR-551b-5p   | 2 |
| <i>circLIFR</i> | miR-552-3p    | 2 |
| <i>circLIFR</i> | miR-552-5p    | 2 |
| <i>circLIFR</i> | miR-556-3p    | 4 |
| <i>circLIFR</i> | miR-556-5p    | 1 |
| <i>circLIFR</i> | miR-5571-3p   | 1 |
| <i>circLIFR</i> | miR-5571-5p   | 7 |
| <i>circLIFR</i> | miR-558       | 2 |
| <i>circLIFR</i> | miR-5580-3p   | 4 |
| <i>circLIFR</i> | miR-5581-3p   | 2 |
| <i>circLIFR</i> | miR-5582-3p   | 3 |
| <i>circLIFR</i> | miR-5583-3p   | 1 |
| <i>circLIFR</i> | miR-5584-3p   | 4 |
| <i>circLIFR</i> | miR-5584-5p   | 1 |
| <i>circLIFR</i> | miR-5585-5p   | 1 |
| <i>circLIFR</i> | miR-5586-3p   | 3 |
| <i>circLIFR</i> | miR-5586-5p   | 2 |
| <i>circLIFR</i> | miR-5588-3p   | 3 |
| <i>circLIFR</i> | miR-5589-5p   | 1 |
| <i>circLIFR</i> | miR-5590-5p   | 2 |
| <i>circLIFR</i> | miR-5591-3p   | 1 |
| <i>circLIFR</i> | miR-561-3p    | 5 |
| <i>circLIFR</i> | miR-561-5p    | 4 |
| <i>circLIFR</i> | miR-562       | 1 |
| <i>circLIFR</i> | miR-567       | 5 |
| <i>circLIFR</i> | miR-5680      | 7 |
| <i>circLIFR</i> | miR-5681a     | 2 |
| <i>circLIFR</i> | miR-5683      | 4 |
| <i>circLIFR</i> | miR-5684      | 2 |
| <i>circLIFR</i> | miR-5687      | 1 |

|                 |                 |   |
|-----------------|-----------------|---|
| <i>circLIFR</i> | miR-569         | 1 |
| <i>circLIFR</i> | miR-5690        | 1 |
| <i>circLIFR</i> | miR-5691        | 2 |
| <i>circLIFR</i> | miR-5692a       | 4 |
| <i>circLIFR</i> | miR-5693        | 3 |
| <i>circLIFR</i> | miR-5694        | 1 |
| <i>circLIFR</i> | miR-5696        | 3 |
| <i>circLIFR</i> | miR-5697        | 5 |
| <i>circLIFR</i> | miR-570-3p      | 6 |
| <i>circLIFR</i> | miR-5701        | 2 |
| <i>circLIFR</i> | miR-5702        | 1 |
| <i>circLIFR</i> | miR-5705        | 1 |
| <i>circLIFR</i> | miR-5707        | 1 |
| <i>circLIFR</i> | miR-5708        | 1 |
| <i>circLIFR</i> | miR-571         | 1 |
| <i>circLIFR</i> | miR-572         | 1 |
| <i>circLIFR</i> | miR-573/3616-5p | 7 |
| <i>circLIFR</i> | miR-5739        | 2 |
| <i>circLIFR</i> | miR-574-3p      | 1 |
| <i>circLIFR</i> | miR-574-5p      | 1 |
| <i>circLIFR</i> | miR-575/4676-5p | 1 |
| <i>circLIFR</i> | miR-576-5p      | 1 |
| <i>circLIFR</i> | miR-577         | 3 |
| <i>circLIFR</i> | miR-578         | 9 |
| <i>circLIFR</i> | miR-579-3p      | 3 |
| <i>circLIFR</i> | miR-580-3p      | 2 |
| <i>circLIFR</i> | miR-582-3p      | 1 |
| <i>circLIFR</i> | miR-582-5p      | 1 |
| <i>circLIFR</i> | miR-583         | 4 |
| <i>circLIFR</i> | miR-587         | 1 |
| <i>circLIFR</i> | miR-588         | 1 |
| <i>circLIFR</i> | miR-589-3p      | 1 |
| <i>circLIFR</i> | miR-590-3p      | 7 |
| <i>circLIFR</i> | miR-591         | 1 |
| <i>circLIFR</i> | miR-592         | 2 |
| <i>circLIFR</i> | miR-593-5p      | 1 |
| <i>circLIFR</i> | miR-595         | 8 |
| <i>circLIFR</i> | miR-596         | 2 |



|                 |                                      |   |
|-----------------|--------------------------------------|---|
| <i>circLIFR</i> | miR-597-3p                           | 1 |
| <i>circLIFR</i> | miR-597-5p                           | 2 |
| <i>circLIFR</i> | miR-598-3p                           | 1 |
| <i>circLIFR</i> | miR-599                              | 2 |
| <i>circLIFR</i> | miR-600                              | 2 |
| <i>circLIFR</i> | miR-605-5p                           | 4 |
| <i>circLIFR</i> | miR-607                              | 5 |
| <i>circLIFR</i> | miR-6071                             | 1 |
| <i>circLIFR</i> | miR-6072/6891-3p                     | 3 |
| <i>circLIFR</i> | miR-6073                             | 4 |
| <i>circLIFR</i> | miR-6074                             | 1 |
| <i>circLIFR</i> | miR-6077                             | 4 |
| <i>circLIFR</i> | miR-6079                             | 6 |
| <i>circLIFR</i> | miR-6080                             | 2 |
| <i>circLIFR</i> | miR-6081                             | 3 |
| <i>circLIFR</i> | miR-6083                             | 1 |
| <i>circLIFR</i> | miR-6085/6813-5p                     | 2 |
| <i>circLIFR</i> | miR-6087                             | 1 |
| <i>circLIFR</i> | miR-6090                             | 1 |
| <i>circLIFR</i> | miR-610                              | 2 |
| <i>circLIFR</i> | miR-612/1285-3p/3187-5p/5189-5p/6860 | 2 |
| <i>circLIFR</i> | miR-6124                             | 7 |
| <i>circLIFR</i> | miR-6125                             | 1 |
| <i>circLIFR</i> | miR-6126                             | 1 |
| <i>circLIFR</i> | miR-6128                             | 5 |
| <i>circLIFR</i> | miR-6131                             | 1 |
| <i>circLIFR</i> | miR-6134                             | 2 |
| <i>circLIFR</i> | miR-616-3p                           | 2 |
| <i>circLIFR</i> | miR-618                              | 1 |
| <i>circLIFR</i> | miR-619-3p                           | 3 |
| <i>circLIFR</i> | miR-619-5p/6506-5p                   | 1 |
| <i>circLIFR</i> | miR-623                              | 2 |
| <i>circLIFR</i> | miR-624-5p                           | 1 |
| <i>circLIFR</i> | miR-626/6876-3p                      | 1 |
| <i>circLIFR</i> | miR-627-3p                           | 1 |
| <i>circLIFR</i> | miR-627-5p                           | 1 |
| <i>circLIFR</i> | miR-628-5p                           | 3 |
| <i>circLIFR</i> | miR-629-3p                           | 2 |

|                 |                 |   |
|-----------------|-----------------|---|
| <i>circLIFR</i> | miR-629-5p      | 1 |
| <i>circLIFR</i> | miR-632/4288    | 2 |
| <i>circLIFR</i> | miR-633         | 1 |
| <i>circLIFR</i> | miR-635/6774-5p | 1 |
| <i>circLIFR</i> | miR-636         | 2 |
| <i>circLIFR</i> | miR-638         | 1 |
| <i>circLIFR</i> | miR-640         | 3 |
| <i>circLIFR</i> | miR-641/3617-5p | 3 |
| <i>circLIFR</i> | miR-642-3p      | 2 |
| <i>circLIFR</i> | miR-642a-5p     | 1 |
| <i>circLIFR</i> | miR-642b-5p     | 1 |
| <i>circLIFR</i> | miR-643         | 2 |
| <i>circLIFR</i> | miR-644a        | 3 |
| <i>circLIFR</i> | miR-647         | 3 |
| <i>circLIFR</i> | miR-648         | 6 |
| <i>circLIFR</i> | miR-6499-3p     | 3 |
| <i>circLIFR</i> | miR-6500-3p     | 1 |
| <i>circLIFR</i> | miR-6501-3p     | 1 |
| <i>circLIFR</i> | miR-6504-3p     | 1 |
| <i>circLIFR</i> | miR-6505-5p     | 3 |
| <i>circLIFR</i> | miR-6507-5p     | 8 |
| <i>circLIFR</i> | miR-651-3p      | 2 |
| <i>circLIFR</i> | miR-651-5p      | 2 |
| <i>circLIFR</i> | miR-6511-3p     | 1 |
| <i>circLIFR</i> | miR-6513-3p     | 3 |
| <i>circLIFR</i> | miR-6513-5p     | 3 |
| <i>circLIFR</i> | miR-6514-5p     | 5 |
| <i>circLIFR</i> | miR-6515-5p     | 3 |
| <i>circLIFR</i> | miR-6516-3p     | 3 |
| <i>circLIFR</i> | miR-6516-5p     | 3 |
| <i>circLIFR</i> | miR-653-3p      | 1 |
| <i>circLIFR</i> | miR-653-5p      | 3 |
| <i>circLIFR</i> | miR-654-5p      | 1 |
| <i>circLIFR</i> | miR-655-5p      | 1 |
| <i>circLIFR</i> | miR-656-3p      | 5 |
| <i>circLIFR</i> | miR-656-5p      | 1 |
| <i>circLIFR</i> | miR-659-3p      | 1 |
| <i>circLIFR</i> | miR-660-3p      | 1 |

|                 |                     |   |
|-----------------|---------------------|---|
| <i>circLIFR</i> | miR-660-5p          | 2 |
| <i>circLIFR</i> | miR-661             | 1 |
| <i>circLIFR</i> | miR-662             | 1 |
| <i>circLIFR</i> | miR-664a-3p         | 1 |
| <i>circLIFR</i> | miR-665             | 3 |
| <i>circLIFR</i> | miR-668-3p          | 1 |
| <i>circLIFR</i> | miR-670-3p          | 2 |
| <i>circLIFR</i> | miR-670-5p          | 2 |
| <i>circLIFR</i> | miR-671-5p          | 2 |
| <i>circLIFR</i> | miR-6715a-3p        | 2 |
| <i>circLIFR</i> | miR-6715b-3p        | 1 |
| <i>circLIFR</i> | miR-6719-3p         | 6 |
| <i>circLIFR</i> | miR-6720-5p         | 3 |
| <i>circLIFR</i> | miR-6721-5p         | 1 |
| <i>circLIFR</i> | miR-6723-5p         | 1 |
| <i>circLIFR</i> | miR-6724-5p/6773-5p | 4 |
| <i>circLIFR</i> | miR-6728-5p         | 2 |
| <i>circLIFR</i> | miR-6729-3p         | 1 |
| <i>circLIFR</i> | miR-6730-3p         | 6 |
| <i>circLIFR</i> | miR-6730-5p         | 2 |
| <i>circLIFR</i> | miR-6733-3p         | 1 |
| <i>circLIFR</i> | miR-6734-3p         | 2 |
| <i>circLIFR</i> | miR-6734-5p         | 1 |
| <i>circLIFR</i> | miR-6735-3p         | 1 |
| <i>circLIFR</i> | miR-6736-3p         | 2 |
| <i>circLIFR</i> | miR-6738-3p         | 2 |
| <i>circLIFR</i> | miR-6739-3p         | 1 |
| <i>circLIFR</i> | miR-6740-5p         | 1 |
| <i>circLIFR</i> | miR-6742-3p         | 1 |
| <i>circLIFR</i> | miR-6744-5p         | 1 |
| <i>circLIFR</i> | miR-6746-3p         | 1 |
| <i>circLIFR</i> | miR-6746-5p         | 1 |
| <i>circLIFR</i> | miR-6749-3p         | 1 |
| <i>circLIFR</i> | miR-675-3p          | 3 |
| <i>circLIFR</i> | miR-675-5p/4466     | 1 |
| <i>circLIFR</i> | miR-6750-3p         | 1 |
| <i>circLIFR</i> | miR-6750-5p/6822-5p | 1 |
| <i>circLIFR</i> | miR-6752-3p         | 1 |

|                 |                       |   |
|-----------------|-----------------------|---|
| <i>circLIFR</i> | miR-6753-5p           | 2 |
| <i>circLIFR</i> | miR-6756-5p/6766-5p   | 1 |
| <i>circLIFR</i> | miR-6757-3p           | 3 |
| <i>circLIFR</i> | miR-6757-5p           | 2 |
| <i>circLIFR</i> | miR-6758-3p           | 1 |
| <i>circLIFR</i> | miR-6758-5p/6856-5p   | 2 |
| <i>circLIFR</i> | miR-6759-5p           | 3 |
| <i>circLIFR</i> | miR-676-3p            | 1 |
| <i>circLIFR</i> | miR-676-5p            | 3 |
| <i>circLIFR</i> | miR-6761-5p           | 2 |
| <i>circLIFR</i> | miR-6762-5p/6845-5p   | 1 |
| <i>circLIFR</i> | miR-6763-3p           | 1 |
| <i>circLIFR</i> | miR-6764-3p/6824-3p   | 4 |
| <i>circLIFR</i> | miR-6765-3p           | 4 |
| <i>circLIFR</i> | miR-6765-5p           | 1 |
| <i>circLIFR</i> | miR-6767-3p           | 1 |
| <i>circLIFR</i> | miR-6767-5p           | 1 |
| <i>circLIFR</i> | miR-6768-5p           | 2 |
| <i>circLIFR</i> | miR-6769a-5p/6769b-5p | 1 |
| <i>circLIFR</i> | miR-6770-3p           | 1 |
| <i>circLIFR</i> | miR-6770-5p           | 2 |
| <i>circLIFR</i> | miR-6771-3p           | 1 |
| <i>circLIFR</i> | miR-6772-3p           | 1 |
| <i>circLIFR</i> | miR-6773-3p           | 1 |
| <i>circLIFR</i> | miR-6774-3p           | 1 |
| <i>circLIFR</i> | miR-6776-5p           | 1 |
| <i>circLIFR</i> | miR-6779-3p           | 1 |
| <i>circLIFR</i> | miR-6780b-3p          | 2 |
| <i>circLIFR</i> | miR-6782-5p           | 1 |
| <i>circLIFR</i> | miR-6783-5p           | 1 |
| <i>circLIFR</i> | miR-6784-3p/6862-3p   | 1 |
| <i>circLIFR</i> | miR-6784-5p           | 1 |
| <i>circLIFR</i> | miR-6786-5p           | 1 |
| <i>circLIFR</i> | miR-6787-3p           | 2 |
| <i>circLIFR</i> | miR-6790-3p           | 1 |
| <i>circLIFR</i> | miR-6793-3p           | 2 |
| <i>circLIFR</i> | miR-6795-3p           | 1 |
| <i>circLIFR</i> | miR-6796-3p           | 1 |

|                 |                     |   |
|-----------------|---------------------|---|
| <i>circLIFR</i> | miR-6796-5p         | 3 |
| <i>circLIFR</i> | miR-6798-3p         | 1 |
| <i>circLIFR</i> | miR-6798-5p         | 1 |
| <i>circLIFR</i> | miR-6799-5p         | 2 |
| <i>circLIFR</i> | miR-6800-3p         | 1 |
| <i>circLIFR</i> | miR-6802-3p         | 1 |
| <i>circLIFR</i> | miR-6804-3p         | 3 |
| <i>circLIFR</i> | miR-6804-5p         | 2 |
| <i>circLIFR</i> | miR-6806-5p         | 1 |
| <i>circLIFR</i> | miR-6808-3p         | 1 |
| <i>circLIFR</i> | miR-6809-3p         | 2 |
| <i>circLIFR</i> | miR-6810-5p         | 1 |
| <i>circLIFR</i> | miR-6812-3p         | 1 |
| <i>circLIFR</i> | miR-6818-3p         | 2 |
| <i>circLIFR</i> | miR-6818-5p         | 1 |
| <i>circLIFR</i> | miR-6819-3p/6877-3p | 1 |
| <i>circLIFR</i> | miR-6821-3p         | 1 |
| <i>circLIFR</i> | miR-6827-5p         | 3 |
| <i>circLIFR</i> | miR-6828-3p         | 1 |
| <i>circLIFR</i> | miR-6828-5p         | 2 |
| <i>circLIFR</i> | miR-6830-5p         | 1 |
| <i>circLIFR</i> | miR-6831-3p         | 1 |
| <i>circLIFR</i> | miR-6832-3p         | 3 |
| <i>circLIFR</i> | miR-6832-5p         | 1 |
| <i>circLIFR</i> | miR-6833-5p         | 6 |
| <i>circLIFR</i> | miR-6834-5p         | 1 |
| <i>circLIFR</i> | miR-6837-3p         | 1 |
| <i>circLIFR</i> | miR-6840-3p         | 1 |
| <i>circLIFR</i> | miR-6842-3p         | 3 |
| <i>circLIFR</i> | miR-6843-3p/6848-3p | 3 |
| <i>circLIFR</i> | miR-6844            | 1 |
| <i>circLIFR</i> | miR-6845-3p         | 2 |
| <i>circLIFR</i> | miR-6846-3p         | 1 |
| <i>circLIFR</i> | miR-6847-3p         | 2 |
| <i>circLIFR</i> | miR-6849-3p         | 2 |
| <i>circLIFR</i> | miR-6852-5p         | 1 |
| <i>circLIFR</i> | miR-6853-3p         | 2 |
| <i>circLIFR</i> | miR-6857-3p         | 1 |

|                 |             |   |
|-----------------|-------------|---|
| <i>circLIFR</i> | miR-6857-5p | 1 |
| <i>circLIFR</i> | miR-6858-3p | 1 |
| <i>circLIFR</i> | miR-6859-3p | 1 |
| <i>circLIFR</i> | miR-6861-5p | 1 |
| <i>circLIFR</i> | miR-6864-5p | 1 |
| <i>circLIFR</i> | miR-6865-3p | 4 |
| <i>circLIFR</i> | miR-6866-5p | 2 |
| <i>circLIFR</i> | miR-6867-3p | 1 |
| <i>circLIFR</i> | miR-6867-5p | 3 |
| <i>circLIFR</i> | miR-6868-3p | 1 |
| <i>circLIFR</i> | miR-6868-5p | 1 |
| <i>circLIFR</i> | miR-6869-5p | 1 |
| <i>circLIFR</i> | miR-6870-3p | 3 |
| <i>circLIFR</i> | miR-6871-3p | 4 |
| <i>circLIFR</i> | miR-6871-5p | 2 |
| <i>circLIFR</i> | miR-6872-3p | 2 |
| <i>circLIFR</i> | miR-6873-5p | 1 |
| <i>circLIFR</i> | miR-6874-5p | 5 |
| <i>circLIFR</i> | miR-6875-3p | 2 |
| <i>circLIFR</i> | miR-6879-3p | 1 |
| <i>circLIFR</i> | miR-6880-5p | 3 |
| <i>circLIFR</i> | miR-6882-5p | 7 |
| <i>circLIFR</i> | miR-6884-3p | 1 |
| <i>circLIFR</i> | miR-6885-3p | 2 |
| <i>circLIFR</i> | miR-6886-3p | 2 |
| <i>circLIFR</i> | miR-6886-5p | 1 |
| <i>circLIFR</i> | miR-6887-3p | 1 |
| <i>circLIFR</i> | miR-6888-5p | 2 |
| <i>circLIFR</i> | miR-6890-5p | 1 |
| <i>circLIFR</i> | miR-6892-3p | 3 |
| <i>circLIFR</i> | miR-6894-5p | 1 |
| <i>circLIFR</i> | miR-7-3p    | 4 |
| <i>circLIFR</i> | miR-7-5p    | 4 |
| <i>circLIFR</i> | miR-7106-5p | 2 |
| <i>circLIFR</i> | miR-7108-3p | 1 |
| <i>circLIFR</i> | miR-7112-5p | 1 |
| <i>circLIFR</i> | miR-7114-5p | 5 |
| <i>circLIFR</i> | miR-7150    | 1 |

|                 |             |   |
|-----------------|-------------|---|
| <i>circLIFR</i> | miR-7151-5p | 3 |
| <i>circLIFR</i> | miR-7152-3p | 3 |
| <i>circLIFR</i> | miR-7152-5p | 2 |
| <i>circLIFR</i> | miR-7153-3p | 2 |
| <i>circLIFR</i> | miR-7154-3p | 1 |
| <i>circLIFR</i> | miR-7154-5p | 4 |
| <i>circLIFR</i> | miR-7158-3p | 1 |
| <i>circLIFR</i> | miR-7158-5p | 1 |
| <i>circLIFR</i> | miR-7159-3p | 1 |
| <i>circLIFR</i> | miR-7159-5p | 4 |
| <i>circLIFR</i> | miR-7160-5p | 2 |
| <i>circLIFR</i> | miR-7161-3p | 1 |
| <i>circLIFR</i> | miR-7162-3p | 1 |
| <i>circLIFR</i> | miR-744-3p  | 5 |
| <i>circLIFR</i> | miR-7515    | 2 |
| <i>circLIFR</i> | miR-758-3p  | 2 |
| <i>circLIFR</i> | miR-758-5p  | 1 |
| <i>circLIFR</i> | miR-764     | 1 |
| <i>circLIFR</i> | miR-7641    | 3 |
| <i>circLIFR</i> | miR-765     | 1 |
| <i>circLIFR</i> | miR-766-3p  | 3 |
| <i>circLIFR</i> | miR-766-5p  | 1 |
| <i>circLIFR</i> | miR-767-5p  | 1 |
| <i>circLIFR</i> | miR-770-5p  | 1 |
| <i>circLIFR</i> | miR-7702    | 1 |
| <i>circLIFR</i> | miR-7703    | 1 |
| <i>circLIFR</i> | miR-7705    | 1 |
| <i>circLIFR</i> | miR-7706    | 1 |
| <i>circLIFR</i> | miR-7843-3p | 3 |
| <i>circLIFR</i> | miR-7845-5p | 1 |
| <i>circLIFR</i> | miR-7846-3p | 1 |
| <i>circLIFR</i> | miR-7847-3p | 4 |
| <i>circLIFR</i> | miR-7848-3p | 1 |
| <i>circLIFR</i> | miR-7849-3p | 5 |
| <i>circLIFR</i> | miR-7850-5p | 5 |
| <i>circLIFR</i> | miR-7851-3p | 3 |
| <i>circLIFR</i> | miR-7852-3p | 4 |
| <i>circLIFR</i> | miR-7854-3p | 2 |

|                 |              |   |
|-----------------|--------------|---|
| <i>circLIFR</i> | miR-7855-5p  | 5 |
| <i>circLIFR</i> | miR-7856-5p  | 1 |
| <i>circLIFR</i> | miR-7973     | 1 |
| <i>circLIFR</i> | miR-7974     | 2 |
| <i>circLIFR</i> | miR-7975     | 1 |
| <i>circLIFR</i> | miR-7976     | 1 |
| <i>circLIFR</i> | miR-7977     | 5 |
| <i>circLIFR</i> | miR-8062     | 2 |
| <i>circLIFR</i> | miR-8063     | 3 |
| <i>circLIFR</i> | miR-8065     | 2 |
| <i>circLIFR</i> | miR-8066     | 1 |
| <i>circLIFR</i> | miR-8069     | 3 |
| <i>circLIFR</i> | miR-8070     | 1 |
| <i>circLIFR</i> | miR-8071     | 3 |
| <i>circLIFR</i> | miR-8075     | 3 |
| <i>circLIFR</i> | miR-8077     | 2 |
| <i>circLIFR</i> | miR-8083     | 3 |
| <i>circLIFR</i> | miR-8084     | 1 |
| <i>circLIFR</i> | miR-8086     | 1 |
| <i>circLIFR</i> | miR-8087     | 2 |
| <i>circLIFR</i> | miR-8088     | 1 |
| <i>circLIFR</i> | miR-873-5p.1 | 2 |
| <i>circLIFR</i> | miR-873-5p.2 | 1 |
| <i>circLIFR</i> | miR-874-3p   | 1 |
| <i>circLIFR</i> | miR-875-3p   | 6 |
| <i>circLIFR</i> | miR-876-3p   | 1 |
| <i>circLIFR</i> | miR-877-5p   | 2 |
| <i>circLIFR</i> | miR-885-5p   | 3 |
| <i>circLIFR</i> | miR-887-5p   | 3 |
| <i>circLIFR</i> | miR-888-3p   | 4 |
| <i>circLIFR</i> | miR-888-5p   | 1 |
| <i>circLIFR</i> | miR-889-3p   | 2 |
| <i>circLIFR</i> | miR-890      | 2 |
| <i>circLIFR</i> | miR-891a-3p  | 1 |
| <i>circLIFR</i> | miR-891b     | 1 |
| <i>circLIFR</i> | miR-892-5p   | 1 |
| <i>circLIFR</i> | miR-892a     | 1 |
| <i>circLIFR</i> | miR-892b     | 1 |



|                  |                              |   |
|------------------|------------------------------|---|
| <i>circLIFR</i>  | miR-9-3p                     | 1 |
| <i>circLIFR</i>  | miR-9-5p                     | 1 |
| <i>circLIFR</i>  | miR-920/4300/5591-5p/6726-5p | 1 |
| <i>circLIFR</i>  | miR-921                      | 2 |
| <i>circLIFR</i>  | miR-92a-2-5p                 | 1 |
| <i>circLIFR</i>  | miR-93-3p                    | 1 |
| <i>circLIFR</i>  | miR-936                      | 1 |
| <i>circLIFR</i>  | miR-937-5p                   | 1 |
| <i>circLIFR</i>  | miR-938                      | 2 |
| <i>circLIFR</i>  | miR-939-3p                   | 1 |
| <i>circLIFR</i>  | miR-940/6808-5p/6893-5p      | 1 |
| <i>circLIFR</i>  | miR-941                      | 1 |
| <i>circLIFR</i>  | miR-942-5p                   | 2 |
| <i>circLIFR</i>  | miR-943                      | 2 |
| <i>circLIFR</i>  | miR-944                      | 4 |
| <i>circLIFR</i>  | miR-95-5p                    | 6 |
| <i>circLIFR</i>  | miR-9500                     | 1 |
| <i>circLIFR</i>  | miR-96-3p                    | 1 |
| <i>circLIFR</i>  | miR-96-5p/1271-5p            | 1 |
| <i>circLIFR</i>  | miR-99-3p                    | 1 |
| <i>circLIFR</i>  | miR-6782-3p                  | 1 |
| <i>circLIFR</i>  | miR-6834-3p                  | 1 |
| <i>circLIFR</i>  | miR-4433b-5p                 | 1 |
| <i>circLMTK2</i> | let-7-5p/98-5p               | 2 |
| <i>circLMTK2</i> | miR-1-3p/206                 | 1 |
| <i>circLMTK2</i> | miR-1-5p                     | 1 |
| <i>circLMTK2</i> | miR-10-5p                    | 2 |
| <i>circLMTK2</i> | miR-100-3p                   | 2 |
| <i>circLMTK2</i> | miR-103-3p/107               | 2 |
| <i>circLMTK2</i> | miR-103a-2-5p                | 1 |
| <i>circLMTK2</i> | miR-103b                     | 1 |
| <i>circLMTK2</i> | miR-105-3p                   | 1 |
| <i>circLMTK2</i> | miR-106a-3p                  | 2 |
| <i>circLMTK2</i> | miR-1178-3p                  | 1 |
| <i>circLMTK2</i> | miR-1178-5p                  | 1 |
| <i>circLMTK2</i> | miR-1179                     | 2 |
| <i>circLMTK2</i> | miR-1180-3p                  | 3 |
| <i>circLMTK2</i> | miR-1180-5p                  | 1 |

|                  |                          |   |
|------------------|--------------------------|---|
| <i>circLMTK2</i> | miR-1181                 | 1 |
| <i>circLMTK2</i> | miR-1182                 | 1 |
| <i>circLMTK2</i> | miR-1183                 | 1 |
| <i>circLMTK2</i> | miR-1184                 | 1 |
| <i>circLMTK2</i> | miR-1185-5p              | 1 |
| <i>circLMTK2</i> | miR-1193                 | 1 |
| <i>circLMTK2</i> | miR-1197                 | 2 |
| <i>circLMTK2</i> | miR-1199-3p              | 1 |
| <i>circLMTK2</i> | miR-1199-5p/6751-3p      | 1 |
| <i>circLMTK2</i> | miR-1200                 | 2 |
| <i>circLMTK2</i> | miR-1204                 | 1 |
| <i>circLMTK2</i> | miR-1205                 | 1 |
| <i>circLMTK2</i> | miR-1207-3p              | 2 |
| <i>circLMTK2</i> | miR-1207-5p/4763-3p      | 1 |
| <i>circLMTK2</i> | miR-1208                 | 2 |
| <i>circLMTK2</i> | miR-122-3p               | 1 |
| <i>circLMTK2</i> | miR-122-5p               | 3 |
| <i>circLMTK2</i> | miR-1224-5p              | 3 |
| <i>circLMTK2</i> | miR-1225-3p              | 1 |
| <i>circLMTK2</i> | miR-1225-5p              | 1 |
| <i>circLMTK2</i> | miR-1226-3p              | 1 |
| <i>circLMTK2</i> | miR-1227-5p              | 1 |
| <i>circLMTK2</i> | miR-1229-5p              | 1 |
| <i>circLMTK2</i> | miR-1231                 | 3 |
| <i>circLMTK2</i> | miR-1233-5p/6778-5p      | 1 |
| <i>circLMTK2</i> | miR-1234-3p/7107-5p      | 1 |
| <i>circLMTK2</i> | miR-1236-5p              | 1 |
| <i>circLMTK2</i> | miR-1237-3p              | 2 |
| <i>circLMTK2</i> | miR-1237-5p/4488/4697-5p | 2 |
| <i>circLMTK2</i> | miR-1238-3p              | 1 |
| <i>circLMTK2</i> | miR-1243                 | 4 |
| <i>circLMTK2</i> | miR-1246                 | 1 |
| <i>circLMTK2</i> | miR-1247-3p              | 1 |
| <i>circLMTK2</i> | miR-1247-5p              | 1 |
| <i>circLMTK2</i> | miR-1248                 | 2 |
| <i>circLMTK2</i> | miR-125-5p               | 1 |
| <i>circLMTK2</i> | miR-1250-5p              | 1 |
| <i>circLMTK2</i> | miR-1251-3p              | 1 |

|                  |                    |   |
|------------------|--------------------|---|
| <i>circLMTK2</i> | miR-1251-5p        | 1 |
| <i>circLMTK2</i> | miR-1252-5p        | 1 |
| <i>circLMTK2</i> | miR-1253           | 1 |
| <i>circLMTK2</i> | miR-1254/3116      | 1 |
| <i>circLMTK2</i> | miR-1255a/1255b-5p | 1 |
| <i>circLMTK2</i> | miR-1255b-2-3p     | 2 |
| <i>circLMTK2</i> | miR-1256           | 2 |
| <i>circLMTK2</i> | miR-125a-3p        | 2 |
| <i>circLMTK2</i> | miR-125b-1-3p      | 1 |
| <i>circLMTK2</i> | miR-125b-2-3p      | 1 |
| <i>circLMTK2</i> | miR-1261           | 1 |
| <i>circLMTK2</i> | miR-1264           | 1 |
| <i>circLMTK2</i> | miR-1265           | 2 |
| <i>circLMTK2</i> | miR-1266-3p        | 2 |
| <i>circLMTK2</i> | miR-1266-5p/4518   | 3 |
| <i>circLMTK2</i> | miR-1268a/1268b    | 1 |
| <i>circLMTK2</i> | miR-1269           | 2 |
| <i>circLMTK2</i> | miR-127-5p         | 1 |
| <i>circLMTK2</i> | miR-1270           | 1 |
| <i>circLMTK2</i> | miR-1272           | 1 |
| <i>circLMTK2</i> | miR-1273f          | 1 |
| <i>circLMTK2</i> | miR-1273g-3p       | 4 |
| <i>circLMTK2</i> | miR-1275/4665-5p   | 1 |
| <i>circLMTK2</i> | miR-1276           | 2 |
| <i>circLMTK2</i> | miR-1277-5p        | 1 |
| <i>circLMTK2</i> | miR-128-1-5p       | 1 |
| <i>circLMTK2</i> | miR-1284           | 3 |
| <i>circLMTK2</i> | miR-1286           | 1 |
| <i>circLMTK2</i> | miR-1287-3p        | 1 |
| <i>circLMTK2</i> | miR-1287-5p        | 2 |
| <i>circLMTK2</i> | miR-1288-3p        | 3 |
| <i>circLMTK2</i> | miR-1289           | 1 |
| <i>circLMTK2</i> | miR-129-5p         | 1 |
| <i>circLMTK2</i> | miR-1291/6775-3p   | 2 |
| <i>circLMTK2</i> | miR-1292-5p        | 1 |
| <i>circLMTK2</i> | miR-1294           | 1 |
| <i>circLMTK2</i> | miR-1295b-3p       | 1 |
| <i>circLMTK2</i> | miR-1295b-5p/1912  | 1 |

|                  |                                      |   |
|------------------|--------------------------------------|---|
| <i>circLMTK2</i> | miR-1296-3p                          | 1 |
| <i>circLMTK2</i> | miR-1296-5p                          | 1 |
| <i>circLMTK2</i> | miR-1298-3p                          | 1 |
| <i>circLMTK2</i> | miR-1299                             | 2 |
| <i>circLMTK2</i> | miR-1301-3p                          | 2 |
| <i>circLMTK2</i> | miR-1302/4298                        | 2 |
| <i>circLMTK2</i> | miR-1304-3p                          | 2 |
| <i>circLMTK2</i> | miR-1304-5p                          | 1 |
| <i>circLMTK2</i> | miR-1305                             | 1 |
| <i>circLMTK2</i> | miR-130b-5p                          | 3 |
| <i>circLMTK2</i> | miR-132-5p                           | 3 |
| <i>circLMTK2</i> | miR-1322                             | 1 |
| <i>circLMTK2</i> | miR-1324                             | 4 |
| <i>circLMTK2</i> | miR-133a-3p.1                        | 1 |
| <i>circLMTK2</i> | miR-133a-3p.2/133b                   | 1 |
| <i>circLMTK2</i> | miR-133a-5p                          | 3 |
| <i>circLMTK2</i> | miR-134-3p                           | 3 |
| <i>circLMTK2</i> | miR-134-5p                           | 2 |
| <i>circLMTK2</i> | miR-1343-3p                          | 4 |
| <i>circLMTK2</i> | miR-135b-3p                          | 2 |
| <i>circLMTK2</i> | miR-136-3p                           | 2 |
| <i>circLMTK2</i> | miR-136-5p                           | 1 |
| <i>circLMTK2</i> | miR-138-5p                           | 3 |
| <i>circLMTK2</i> | miR-140-3p.1                         | 1 |
| <i>circLMTK2</i> | miR-141-5p                           | 4 |
| <i>circLMTK2</i> | miR-143-3p                           | 1 |
| <i>circLMTK2</i> | miR-145-3p                           | 2 |
| <i>circLMTK2</i> | miR-145-5p                           | 2 |
| <i>circLMTK2</i> | miR-1468-5p                          | 1 |
| <i>circLMTK2</i> | miR-146a-3p                          | 5 |
| <i>circLMTK2</i> | miR-146b-3p                          | 1 |
| <i>circLMTK2</i> | miR-147b                             | 1 |
| <i>circLMTK2</i> | miR-148a-5p                          | 4 |
| <i>circLMTK2</i> | miR-148b-5p/6874-3p                  | 3 |
| <i>circLMTK2</i> | miR-149-3p/4728-5p/6785-5p/6883-5p   | 3 |
| <i>circLMTK2</i> | miR-149-5p                           | 8 |
| <i>circLMTK2</i> | miR-15-5p/16-5p/195-5p/424-5p/497-5p | 2 |
| <i>circLMTK2</i> | miR-150-5p                           | 2 |

|                  |                                     |   |
|------------------|-------------------------------------|---|
| <i>circLMTK2</i> | miR-151-3p                          | 1 |
| <i>circLMTK2</i> | miR-151-5p                          | 1 |
| <i>circLMTK2</i> | miR-152-5p                          | 2 |
| <i>circLMTK2</i> | miR-153-3p                          | 1 |
| <i>circLMTK2</i> | miR-153-5p                          | 1 |
| <i>circLMTK2</i> | miR-1538/4745-3p                    | 1 |
| <i>circLMTK2</i> | miR-1587/3620-5p                    | 2 |
| <i>circLMTK2</i> | miR-16-1-3p                         | 1 |
| <i>circLMTK2</i> | miR-17-3p                           | 1 |
| <i>circLMTK2</i> | miR-17-5p/20-5p/93-5p/106-5p/519-3p | 5 |
| <i>circLMTK2</i> | miR-181-3p/4420                     | 2 |
| <i>circLMTK2</i> | miR-181-5p                          | 1 |
| <i>circLMTK2</i> | miR-181a-3p                         | 2 |
| <i>circLMTK2</i> | miR-181c-3p                         | 1 |
| <i>circLMTK2</i> | miR-182-3p                          | 1 |
| <i>circLMTK2</i> | miR-1827                            | 1 |
| <i>circLMTK2</i> | miR-184                             | 1 |
| <i>circLMTK2</i> | miR-185-3p                          | 1 |
| <i>circLMTK2</i> | miR-185-5p                          | 2 |
| <i>circLMTK2</i> | miR-188-5p                          | 1 |
| <i>circLMTK2</i> | miR-19-3p                           | 2 |
| <i>circLMTK2</i> | miR-19-5p                           | 1 |
| <i>circLMTK2</i> | miR-1909-3p/6722-3p                 | 2 |
| <i>circLMTK2</i> | miR-191-3p                          | 1 |
| <i>circLMTK2</i> | miR-1910-3p/6511a-5p                | 3 |
| <i>circLMTK2</i> | miR-1910-5p                         | 3 |
| <i>circLMTK2</i> | miR-1911-3p                         | 2 |
| <i>circLMTK2</i> | miR-1914-5p                         | 4 |
| <i>circLMTK2</i> | miR-1915-3p/6764-5p                 | 2 |
| <i>circLMTK2</i> | miR-193-3p                          | 1 |
| <i>circLMTK2</i> | miR-193a-5p                         | 3 |
| <i>circLMTK2</i> | miR-193b-5p                         | 2 |
| <i>circLMTK2</i> | miR-194-3p                          | 1 |
| <i>circLMTK2</i> | miR-196-5p                          | 2 |
| <i>circLMTK2</i> | miR-196b-3p                         | 1 |
| <i>circLMTK2</i> | miR-197-5p/3132                     | 1 |
| <i>circLMTK2</i> | miR-1972                            | 1 |
| <i>circLMTK2</i> | miR-1976                            | 2 |

|                  |                     |   |
|------------------|---------------------|---|
| <i>circLMTK2</i> | miR-198             | 3 |
| <i>circLMTK2</i> | miR-199-3p          | 1 |
| <i>circLMTK2</i> | miR-200ab-5p        | 1 |
| <i>circLMTK2</i> | miR-202-3p          | 2 |
| <i>circLMTK2</i> | miR-203b-3p         | 1 |
| <i>circLMTK2</i> | miR-203b-5p/6718-5p | 2 |
| <i>circLMTK2</i> | miR-204-3p/4646-5p  | 4 |
| <i>circLMTK2</i> | miR-204-5p/211-5p   | 1 |
| <i>circLMTK2</i> | miR-205-3p          | 2 |
| <i>circLMTK2</i> | miR-205-5p          | 1 |
| <i>circLMTK2</i> | miR-2052            | 1 |
| <i>circLMTK2</i> | miR-208-3p          | 1 |
| <i>circLMTK2</i> | miR-20a-3p          | 2 |
| <i>circLMTK2</i> | miR-21-3p/3591-3p   | 2 |
| <i>circLMTK2</i> | miR-210-3p          | 1 |
| <i>circLMTK2</i> | miR-211-3p          | 3 |
| <i>circLMTK2</i> | miR-2110            | 3 |
| <i>circLMTK2</i> | miR-2113            | 3 |
| <i>circLMTK2</i> | miR-2114-3p         | 1 |
| <i>circLMTK2</i> | miR-2114-5p         | 2 |
| <i>circLMTK2</i> | miR-2115-3p         | 1 |
| <i>circLMTK2</i> | miR-2115-5p         | 2 |
| <i>circLMTK2</i> | miR-2116-3p         | 2 |
| <i>circLMTK2</i> | miR-2116-5p         | 1 |
| <i>circLMTK2</i> | miR-2117            | 1 |
| <i>circLMTK2</i> | miR-214-3p/3619-5p  | 2 |
| <i>circLMTK2</i> | miR-214-5p          | 2 |
| <i>circLMTK2</i> | miR-215-3p          | 2 |
| <i>circLMTK2</i> | miR-217             | 1 |
| <i>circLMTK2</i> | miR-218-1-3p        | 1 |
| <i>circLMTK2</i> | miR-218-2-3p        | 1 |
| <i>circLMTK2</i> | miR-218-5p          | 2 |
| <i>circLMTK2</i> | miR-219a-1-3p       | 1 |
| <i>circLMTK2</i> | miR-219a-2-3p       | 3 |
| <i>circLMTK2</i> | miR-219b-3p         | 3 |
| <i>circLMTK2</i> | miR-219b-5p         | 3 |
| <i>circLMTK2</i> | miR-22-5p           | 1 |
| <i>circLMTK2</i> | miR-221-5p/8073     | 4 |

|                  |                                              |   |
|------------------|----------------------------------------------|---|
| <i>circLMTK2</i> | miR-222-5p                                   | 2 |
| <i>circLMTK2</i> | miR-224-5p                                   | 2 |
| <i>circLMTK2</i> | miR-2276-3p                                  | 2 |
| <i>circLMTK2</i> | miR-2277-3p                                  | 1 |
| <i>circLMTK2</i> | miR-23-5p                                    | 1 |
| <i>circLMTK2</i> | miR-2355-3p                                  | 2 |
| <i>circLMTK2</i> | miR-2355-5p                                  | 1 |
| <i>circLMTK2</i> | miR-24-3p                                    | 3 |
| <i>circLMTK2</i> | miR-2467-3p                                  | 2 |
| <i>circLMTK2</i> | miR-2467-5p                                  | 4 |
| <i>circLMTK2</i> | miR-25-5p                                    | 1 |
| <i>circLMTK2</i> | miR-26-5p                                    | 1 |
| <i>circLMTK2</i> | miR-2682-3p/6781-3p                          | 2 |
| <i>circLMTK2</i> | miR-26b-3p                                   | 1 |
| <i>circLMTK2</i> | miR-27-3p                                    | 1 |
| <i>circLMTK2</i> | miR-27a-5p                                   | 3 |
| <i>circLMTK2</i> | miR-296-5p                                   | 2 |
| <i>circLMTK2</i> | miR-298                                      | 1 |
| <i>circLMTK2</i> | miR-299-5p                                   | 2 |
| <i>circLMTK2</i> | miR-29a-5p                                   | 1 |
| <i>circLMTK2</i> | miR-29b-1-5p                                 | 1 |
| <i>circLMTK2</i> | miR-29b-2-5p                                 | 2 |
| <i>circLMTK2</i> | miR-30-3p                                    | 1 |
| <i>circLMTK2</i> | miR-301a-5p/301b-5p                          | 2 |
| <i>circLMTK2</i> | miR-302a-5p                                  | 1 |
| <i>circLMTK2</i> | miR-3064-5p                                  | 3 |
| <i>circLMTK2</i> | miR-3065-3p                                  | 1 |
| <i>circLMTK2</i> | miR-3065-5p                                  | 1 |
| <i>circLMTK2</i> | miR-3074-5p                                  | 2 |
| <i>circLMTK2</i> | miR-30b-3p/1273h-5p/3689-3p/6779-5p/6780a-5p | 3 |
| <i>circLMTK2</i> | miR-30c-3p/6788-5p                           | 3 |
| <i>circLMTK2</i> | miR-31-3p                                    | 1 |
| <i>circLMTK2</i> | miR-31-5p                                    | 2 |
| <i>circLMTK2</i> | miR-3117-3p                                  | 1 |
| <i>circLMTK2</i> | miR-3119                                     | 1 |
| <i>circLMTK2</i> | miR-3120-5p                                  | 2 |
| <i>circLMTK2</i> | miR-3121-5p                                  | 1 |
| <i>circLMTK2</i> | miR-3122/3913-5p                             | 3 |

|                  |                     |   |
|------------------|---------------------|---|
| <i>circLMTK2</i> | miR-3123            | 1 |
| <i>circLMTK2</i> | miR-3124-3p         | 1 |
| <i>circLMTK2</i> | miR-3126-3p         | 1 |
| <i>circLMTK2</i> | miR-3127-5p         | 3 |
| <i>circLMTK2</i> | miR-3128            | 3 |
| <i>circLMTK2</i> | miR-3130-3p         | 1 |
| <i>circLMTK2</i> | miR-3130-5p/4482-5p | 1 |
| <i>circLMTK2</i> | miR-3135b           | 2 |
| <i>circLMTK2</i> | miR-3136-3p/7155-3p | 1 |
| <i>circLMTK2</i> | miR-3136-5p/4439    | 5 |
| <i>circLMTK2</i> | miR-3138            | 1 |
| <i>circLMTK2</i> | miR-3140-3p         | 1 |
| <i>circLMTK2</i> | miR-3143            | 2 |
| <i>circLMTK2</i> | miR-3144-5p         | 1 |
| <i>circLMTK2</i> | miR-3145-5p         | 4 |
| <i>circLMTK2</i> | miR-3147            | 2 |
| <i>circLMTK2</i> | miR-3150a-3p        | 3 |
| <i>circLMTK2</i> | miR-3150b-3p        | 2 |
| <i>circLMTK2</i> | miR-3156-5p         | 1 |
| <i>circLMTK2</i> | miR-3157-3p         | 1 |
| <i>circLMTK2</i> | miR-3157-5p         | 1 |
| <i>circLMTK2</i> | miR-3158-3p         | 2 |
| <i>circLMTK2</i> | miR-3158-5p         | 1 |
| <i>circLMTK2</i> | miR-3160-3p         | 3 |
| <i>circLMTK2</i> | miR-3160-5p         | 1 |
| <i>circLMTK2</i> | miR-3162-3p         | 1 |
| <i>circLMTK2</i> | miR-3163            | 1 |
| <i>circLMTK2</i> | miR-3164            | 2 |
| <i>circLMTK2</i> | miR-3165            | 1 |
| <i>circLMTK2</i> | miR-3166            | 3 |
| <i>circLMTK2</i> | miR-3168            | 3 |
| <i>circLMTK2</i> | miR-3169            | 3 |
| <i>circLMTK2</i> | miR-3170/6855-5p    | 2 |
| <i>circLMTK2</i> | miR-3173-3p/6891-5p | 2 |
| <i>circLMTK2</i> | miR-3173-5p         | 1 |
| <i>circLMTK2</i> | miR-3174            | 1 |
| <i>circLMTK2</i> | miR-3175            | 3 |
| <i>circLMTK2</i> | miR-3176/3922-3p    | 2 |



|                  |                           |   |
|------------------|---------------------------|---|
| <i>circLMTK2</i> | miR-3177-3p               | 1 |
| <i>circLMTK2</i> | miR-3179                  | 1 |
| <i>circLMTK2</i> | miR-3180-3p               | 2 |
| <i>circLMTK2</i> | miR-3180-5p               | 4 |
| <i>circLMTK2</i> | miR-3181                  | 3 |
| <i>circLMTK2</i> | miR-3182                  | 2 |
| <i>circLMTK2</i> | miR-3184-3p               | 1 |
| <i>circLMTK2</i> | miR-3185                  | 2 |
| <i>circLMTK2</i> | miR-3188                  | 4 |
| <i>circLMTK2</i> | miR-3190-3p               | 1 |
| <i>circLMTK2</i> | miR-3190-5p               | 2 |
| <i>circLMTK2</i> | miR-3191-3p               | 1 |
| <i>circLMTK2</i> | miR-3191-5p               | 2 |
| <i>circLMTK2</i> | miR-3192-3p               | 1 |
| <i>circLMTK2</i> | miR-3192-5p               | 4 |
| <i>circLMTK2</i> | miR-3193                  | 1 |
| <i>circLMTK2</i> | miR-3194-3p               | 1 |
| <i>circLMTK2</i> | miR-3194-5p               | 1 |
| <i>circLMTK2</i> | miR-3195                  | 1 |
| <i>circLMTK2</i> | miR-3198/4309             | 1 |
| <i>circLMTK2</i> | miR-3199/8052             | 2 |
| <i>circLMTK2</i> | miR-320                   | 1 |
| <i>circLMTK2</i> | miR-3200-5p               | 3 |
| <i>circLMTK2</i> | miR-3201/4791             | 1 |
| <i>circLMTK2</i> | miR-3202                  | 1 |
| <i>circLMTK2</i> | miR-320e                  | 1 |
| <i>circLMTK2</i> | miR-323b-5p/410-5p/494-5p | 2 |
| <i>circLMTK2</i> | miR-324-5p                | 2 |
| <i>circLMTK2</i> | miR-328-3p                | 1 |
| <i>circLMTK2</i> | miR-328-5p/6885-5p        | 1 |
| <i>circLMTK2</i> | miR-329-5p                | 1 |
| <i>circLMTK2</i> | miR-33-5p                 | 1 |
| <i>circLMTK2</i> | miR-330-3p                | 1 |
| <i>circLMTK2</i> | miR-330-3p.2              | 1 |
| <i>circLMTK2</i> | miR-331-3p                | 1 |
| <i>circLMTK2</i> | miR-335-3p                | 1 |
| <i>circLMTK2</i> | miR-338-3p                | 1 |
| <i>circLMTK2</i> | miR-338-5p                | 1 |

|                  |                       |   |
|------------------|-----------------------|---|
| <i>circLMTK2</i> | miR-339-3p            | 1 |
| <i>circLMTK2</i> | miR-339-5p            | 1 |
| <i>circLMTK2</i> | miR-34-5p/449-5p      | 1 |
| <i>circLMTK2</i> | miR-342-5p/4664-5p    | 1 |
| <i>circLMTK2</i> | miR-345-5p            | 1 |
| <i>circLMTK2</i> | miR-346               | 3 |
| <i>circLMTK2</i> | miR-34a-3p            | 1 |
| <i>circLMTK2</i> | miR-34b-5p/449c-5p    | 3 |
| <i>circLMTK2</i> | miR-3605-3p           | 1 |
| <i>circLMTK2</i> | miR-3605-5p           | 1 |
| <i>circLMTK2</i> | miR-361-5p            | 1 |
| <i>circLMTK2</i> | miR-3611              | 1 |
| <i>circLMTK2</i> | miR-3612              | 2 |
| <i>circLMTK2</i> | miR-3613-3p           | 4 |
| <i>circLMTK2</i> | miR-3614-3p           | 2 |
| <i>circLMTK2</i> | miR-3615              | 2 |
| <i>circLMTK2</i> | miR-3616-3p           | 1 |
| <i>circLMTK2</i> | miR-3617-3p           | 1 |
| <i>circLMTK2</i> | miR-3620-3p           | 1 |
| <i>circLMTK2</i> | miR-3621              | 1 |
| <i>circLMTK2</i> | miR-3622a-3p/3622b-3p | 2 |
| <i>circLMTK2</i> | miR-3648              | 1 |
| <i>circLMTK2</i> | miR-3649              | 3 |
| <i>circLMTK2</i> | miR-3652/4430         | 6 |
| <i>circLMTK2</i> | miR-3653-5p           | 2 |
| <i>circLMTK2</i> | miR-3654              | 4 |
| <i>circLMTK2</i> | miR-3655              | 1 |
| <i>circLMTK2</i> | miR-3656              | 1 |
| <i>circLMTK2</i> | miR-3659              | 1 |
| <i>circLMTK2</i> | miR-365a-5p/365b-5p   | 2 |
| <i>circLMTK2</i> | miR-3660/4526         | 3 |
| <i>circLMTK2</i> | miR-3662              | 1 |
| <i>circLMTK2</i> | miR-3663-5p           | 2 |
| <i>circLMTK2</i> | miR-3664-3p           | 3 |
| <i>circLMTK2</i> | miR-3665              | 5 |
| <i>circLMTK2</i> | miR-3667-3p           | 1 |
| <i>circLMTK2</i> | miR-3675-5p           | 1 |
| <i>circLMTK2</i> | miR-3677-3p           | 1 |

|                  |                           |   |
|------------------|---------------------------|---|
| <i>circLMTK2</i> | miR-3677-5p               | 3 |
| <i>circLMTK2</i> | miR-3679-3p               | 1 |
| <i>circLMTK2</i> | miR-3680-5p               | 1 |
| <i>circLMTK2</i> | miR-3682-3p               | 1 |
| <i>circLMTK2</i> | miR-3682-5p               | 1 |
| <i>circLMTK2</i> | miR-3686                  | 3 |
| <i>circLMTK2</i> | miR-3688-5p               | 1 |
| <i>circLMTK2</i> | miR-3689d/6851-5p         | 3 |
| <i>circLMTK2</i> | miR-369-3p                | 1 |
| <i>circLMTK2</i> | miR-369-5p                | 1 |
| <i>circLMTK2</i> | miR-3691-3p               | 2 |
| <i>circLMTK2</i> | miR-3692-3p               | 1 |
| <i>circLMTK2</i> | miR-3692-5p               | 5 |
| <i>circLMTK2</i> | miR-370-3p                | 3 |
| <i>circLMTK2</i> | miR-371-5p                | 3 |
| <i>circLMTK2</i> | miR-371b-5p/373-5p/616-5p | 3 |
| <i>circLMTK2</i> | miR-372-5p                | 3 |
| <i>circLMTK2</i> | miR-374-5p                | 1 |
| <i>circLMTK2</i> | miR-374c-3p               | 1 |
| <i>circLMTK2</i> | miR-376b-5p/376c-5p       | 1 |
| <i>circLMTK2</i> | miR-376c-3p               | 1 |
| <i>circLMTK2</i> | miR-377-5p/6086           | 1 |
| <i>circLMTK2</i> | miR-378-3p                | 4 |
| <i>circLMTK2</i> | miR-378a-5p               | 2 |
| <i>circLMTK2</i> | miR-378g                  | 2 |
| <i>circLMTK2</i> | miR-378j/6839-5p          | 2 |
| <i>circLMTK2</i> | miR-379-5p                | 1 |
| <i>circLMTK2</i> | miR-380-5p/563            | 3 |
| <i>circLMTK2</i> | miR-381-5p                | 1 |
| <i>circLMTK2</i> | miR-382-3p                | 2 |
| <i>circLMTK2</i> | miR-382-5p                | 1 |
| <i>circLMTK2</i> | miR-383-3p                | 1 |
| <i>circLMTK2</i> | miR-383-5p.2              | 1 |
| <i>circLMTK2</i> | miR-3907                  | 3 |
| <i>circLMTK2</i> | miR-3909                  | 9 |
| <i>circLMTK2</i> | miR-3912-5p               | 2 |
| <i>circLMTK2</i> | miR-3913-3p               | 5 |
| <i>circLMTK2</i> | miR-3914                  | 1 |

|                  |                     |   |
|------------------|---------------------|---|
| <i>circLMTK2</i> | miR-3915            | 3 |
| <i>circLMTK2</i> | miR-3917            | 2 |
| <i>circLMTK2</i> | miR-3918            | 1 |
| <i>circLMTK2</i> | miR-3919            | 2 |
| <i>circLMTK2</i> | miR-3920            | 1 |
| <i>circLMTK2</i> | miR-3921/4653-5p    | 2 |
| <i>circLMTK2</i> | miR-3922-5p         | 1 |
| <i>circLMTK2</i> | miR-3923            | 1 |
| <i>circLMTK2</i> | miR-3925-3p         | 5 |
| <i>circLMTK2</i> | miR-3925-5p         | 1 |
| <i>circLMTK2</i> | miR-3927-3p/6831-5p | 2 |
| <i>circLMTK2</i> | miR-3928-5p/6806-3p | 2 |
| <i>circLMTK2</i> | miR-3929/4419b/4478 | 3 |
| <i>circLMTK2</i> | miR-3934-3p         | 4 |
| <i>circLMTK2</i> | miR-3934-5p         | 2 |
| <i>circLMTK2</i> | miR-3940-5p/4507    | 2 |
| <i>circLMTK2</i> | miR-3942-3p         | 1 |
| <i>circLMTK2</i> | miR-3944-3p         | 3 |
| <i>circLMTK2</i> | miR-3944-5p         | 1 |
| <i>circLMTK2</i> | miR-3945            | 2 |
| <i>circLMTK2</i> | miR-3973            | 6 |
| <i>circLMTK2</i> | miR-3974            | 1 |
| <i>circLMTK2</i> | miR-3975            | 4 |
| <i>circLMTK2</i> | miR-3977            | 1 |
| <i>circLMTK2</i> | miR-3978            | 1 |
| <i>circLMTK2</i> | miR-410-3p          | 1 |
| <i>circLMTK2</i> | miR-412-5p          | 2 |
| <i>circLMTK2</i> | miR-421             | 1 |
| <i>circLMTK2</i> | miR-423-3p          | 3 |
| <i>circLMTK2</i> | miR-424-3p          | 1 |
| <i>circLMTK2</i> | miR-425-3p          | 3 |
| <i>circLMTK2</i> | miR-425-5p          | 1 |
| <i>circLMTK2</i> | miR-4251            | 3 |
| <i>circLMTK2</i> | miR-4252            | 2 |
| <i>circLMTK2</i> | miR-4253/6862-5p    | 2 |
| <i>circLMTK2</i> | miR-4256            | 1 |
| <i>circLMTK2</i> | miR-4257            | 1 |
| <i>circLMTK2</i> | miR-4259            | 1 |

|                  |                           |   |
|------------------|---------------------------|---|
| <i>circLMTK2</i> | miR-4260                  | 2 |
| <i>circLMTK2</i> | miR-4263                  | 2 |
| <i>circLMTK2</i> | miR-4264                  | 1 |
| <i>circLMTK2</i> | miR-4265/4296/4322        | 3 |
| <i>circLMTK2</i> | miR-4266                  | 1 |
| <i>circLMTK2</i> | miR-4267                  | 2 |
| <i>circLMTK2</i> | miR-4268                  | 3 |
| <i>circLMTK2</i> | miR-4269/6715b-5p         | 1 |
| <i>circLMTK2</i> | miR-4270/4441/6754-5p     | 4 |
| <i>circLMTK2</i> | miR-4271/4725-3p/6780b-5p | 2 |
| <i>circLMTK2</i> | miR-4272                  | 1 |
| <i>circLMTK2</i> | miR-4273/7156-5p          | 1 |
| <i>circLMTK2</i> | miR-4277                  | 2 |
| <i>circLMTK2</i> | miR-4278                  | 1 |
| <i>circLMTK2</i> | miR-4279                  | 1 |
| <i>circLMTK2</i> | miR-4281                  | 2 |
| <i>circLMTK2</i> | miR-4282                  | 1 |
| <i>circLMTK2</i> | miR-4283                  | 3 |
| <i>circLMTK2</i> | miR-4284                  | 3 |
| <i>circLMTK2</i> | miR-4285                  | 1 |
| <i>circLMTK2</i> | miR-4287/4685-3p          | 2 |
| <i>circLMTK2</i> | miR-4289                  | 3 |
| <i>circLMTK2</i> | miR-4290                  | 2 |
| <i>circLMTK2</i> | miR-4291                  | 4 |
| <i>circLMTK2</i> | miR-4292/6791-5p          | 4 |
| <i>circLMTK2</i> | miR-4293                  | 3 |
| <i>circLMTK2</i> | miR-4294                  | 1 |
| <i>circLMTK2</i> | miR-4297/5581-5p          | 3 |
| <i>circLMTK2</i> | miR-4299                  | 3 |
| <i>circLMTK2</i> | miR-4303                  | 5 |
| <i>circLMTK2</i> | miR-4304                  | 2 |
| <i>circLMTK2</i> | miR-4308                  | 4 |
| <i>circLMTK2</i> | miR-431-3p                | 1 |
| <i>circLMTK2</i> | miR-4310/7157-5p          | 2 |
| <i>circLMTK2</i> | miR-4311                  | 2 |
| <i>circLMTK2</i> | miR-4314                  | 2 |
| <i>circLMTK2</i> | miR-4316                  | 1 |
| <i>circLMTK2</i> | miR-4318                  | 2 |

|                  |                                              |   |
|------------------|----------------------------------------------|---|
| <i>circLMTK2</i> | miR-4321                                     | 1 |
| <i>circLMTK2</i> | miR-4324                                     | 1 |
| <i>circLMTK2</i> | miR-4325                                     | 1 |
| <i>circLMTK2</i> | miR-4329                                     | 3 |
| <i>circLMTK2</i> | miR-433-5p                                   | 1 |
| <i>circLMTK2</i> | miR-4330                                     | 3 |
| <i>circLMTK2</i> | miR-4417                                     | 3 |
| <i>circLMTK2</i> | miR-4421/5699-3p                             | 1 |
| <i>circLMTK2</i> | miR-4422                                     | 1 |
| <i>circLMTK2</i> | miR-4423-3p                                  | 2 |
| <i>circLMTK2</i> | miR-4425                                     | 2 |
| <i>circLMTK2</i> | miR-4426/4647/4662b                          | 1 |
| <i>circLMTK2</i> | miR-4428                                     | 2 |
| <i>circLMTK2</i> | miR-4431                                     | 1 |
| <i>circLMTK2</i> | miR-4432                                     | 2 |
| <i>circLMTK2</i> | miR-4433a-3p                                 | 2 |
| <i>circLMTK2</i> | miR-4433a-5p                                 | 1 |
| <i>circLMTK2</i> | miR-4433b-3p                                 | 2 |
| <i>circLMTK2</i> | miR-4433b-5p                                 | 1 |
| <i>circLMTK2</i> | miR-4436b-3p/4632-5p/6735-5p/6879-5p/7843-5p | 3 |
| <i>circLMTK2</i> | miR-4436b-5p                                 | 3 |
| <i>circLMTK2</i> | miR-4437                                     | 2 |
| <i>circLMTK2</i> | miR-4440                                     | 1 |
| <i>circLMTK2</i> | miR-4443                                     | 1 |
| <i>circLMTK2</i> | miR-4446-3p                                  | 2 |
| <i>circLMTK2</i> | miR-4446-5p                                  | 1 |
| <i>circLMTK2</i> | miR-4448                                     | 3 |
| <i>circLMTK2</i> | miR-4449                                     | 1 |
| <i>circLMTK2</i> | miR-4451                                     | 1 |
| <i>circLMTK2</i> | miR-4456                                     | 3 |
| <i>circLMTK2</i> | miR-4459                                     | 2 |
| <i>circLMTK2</i> | miR-4461                                     | 1 |
| <i>circLMTK2</i> | miR-4463                                     | 2 |
| <i>circLMTK2</i> | miR-4464/4748                                | 2 |
| <i>circLMTK2</i> | miR-4468                                     | 1 |
| <i>circLMTK2</i> | miR-4469                                     | 2 |
| <i>circLMTK2</i> | miR-4470                                     | 2 |
| <i>circLMTK2</i> | miR-4471/8059                                | 1 |

|                  |                    |   |
|------------------|--------------------|---|
| <i>circLMTK2</i> | miR-4474-3p        | 1 |
| <i>circLMTK2</i> | miR-448            | 1 |
| <i>circLMTK2</i> | miR-4481/4745-5p   | 1 |
| <i>circLMTK2</i> | miR-4486           | 2 |
| <i>circLMTK2</i> | miR-4487           | 3 |
| <i>circLMTK2</i> | miR-4489           | 3 |
| <i>circLMTK2</i> | miR-4490           | 1 |
| <i>circLMTK2</i> | miR-4493           | 1 |
| <i>circLMTK2</i> | miR-4494           | 1 |
| <i>circLMTK2</i> | miR-4497           | 5 |
| <i>circLMTK2</i> | miR-4499           | 2 |
| <i>circLMTK2</i> | miR-449b-3p        | 2 |
| <i>circLMTK2</i> | miR-4502           | 1 |
| <i>circLMTK2</i> | miR-4504           | 2 |
| <i>circLMTK2</i> | miR-4505/5787      | 6 |
| <i>circLMTK2</i> | miR-4508           | 3 |
| <i>circLMTK2</i> | miR-4509           | 2 |
| <i>circLMTK2</i> | miR-450a-1-3p      | 3 |
| <i>circLMTK2</i> | miR-450a-2-3p      | 2 |
| <i>circLMTK2</i> | miR-450b-3p/769-3p | 1 |
| <i>circLMTK2</i> | miR-4511           | 1 |
| <i>circLMTK2</i> | miR-4512           | 1 |
| <i>circLMTK2</i> | miR-4513/6855-3p   | 2 |
| <i>circLMTK2</i> | miR-4514/4692      | 1 |
| <i>circLMTK2</i> | miR-4515           | 3 |
| <i>circLMTK2</i> | miR-451b           | 2 |
| <i>circLMTK2</i> | miR-452-3p         | 3 |
| <i>circLMTK2</i> | miR-4520-3p        | 3 |
| <i>circLMTK2</i> | miR-4520-5p        | 1 |
| <i>circLMTK2</i> | miR-4522           | 1 |
| <i>circLMTK2</i> | miR-4524a-3p       | 1 |
| <i>circLMTK2</i> | miR-4524b-3p       | 2 |
| <i>circLMTK2</i> | miR-4527/6503-5p   | 1 |
| <i>circLMTK2</i> | miR-4530           | 1 |
| <i>circLMTK2</i> | miR-4531           | 1 |
| <i>circLMTK2</i> | miR-4532           | 1 |
| <i>circLMTK2</i> | miR-4533           | 1 |
| <i>circLMTK2</i> | miR-455-3p.1       | 3 |

|                  |                          |   |
|------------------|--------------------------|---|
| <i>circLMTK2</i> | miR-4632-3p              | 1 |
| <i>circLMTK2</i> | miR-4633-3p/6500-5p      | 1 |
| <i>circLMTK2</i> | miR-4635                 | 3 |
| <i>circLMTK2</i> | miR-4638-3p              | 4 |
| <i>circLMTK2</i> | miR-4639-3p              | 1 |
| <i>circLMTK2</i> | miR-4639-5p              | 1 |
| <i>circLMTK2</i> | miR-4640-5p              | 2 |
| <i>circLMTK2</i> | miR-4642                 | 1 |
| <i>circLMTK2</i> | miR-4645-3p              | 3 |
| <i>circLMTK2</i> | miR-4645-5p/4673         | 2 |
| <i>circLMTK2</i> | miR-4646-3p              | 2 |
| <i>circLMTK2</i> | miR-4648                 | 1 |
| <i>circLMTK2</i> | miR-4649-3p              | 2 |
| <i>circLMTK2</i> | miR-4649-5p/6729-5p      | 1 |
| <i>circLMTK2</i> | miR-4650-3p              | 1 |
| <i>circLMTK2</i> | miR-4650-5p              | 1 |
| <i>circLMTK2</i> | miR-4652-3p              | 3 |
| <i>circLMTK2</i> | miR-4652-5p              | 1 |
| <i>circLMTK2</i> | miR-4653-3p              | 3 |
| <i>circLMTK2</i> | miR-4654/4769-5p         | 1 |
| <i>circLMTK2</i> | miR-4655-3p              | 2 |
| <i>circLMTK2</i> | miR-4655-5p              | 2 |
| <i>circLMTK2</i> | miR-4656                 | 3 |
| <i>circLMTK2</i> | miR-4659a-3p/4659b-3p    | 3 |
| <i>circLMTK2</i> | miR-4660                 | 1 |
| <i>circLMTK2</i> | miR-4661-3p              | 1 |
| <i>circLMTK2</i> | miR-4662-5p              | 1 |
| <i>circLMTK2</i> | miR-4663                 | 2 |
| <i>circLMTK2</i> | miR-4664-3p              | 3 |
| <i>circLMTK2</i> | miR-4666a-5p             | 1 |
| <i>circLMTK2</i> | miR-4667-5p/4700-5p/8089 | 4 |
| <i>circLMTK2</i> | miR-4668-3p              | 1 |
| <i>circLMTK2</i> | miR-4674                 | 2 |
| <i>circLMTK2</i> | miR-4675/4741            | 3 |
| <i>circLMTK2</i> | miR-4677-3p              | 5 |
| <i>circLMTK2</i> | miR-4677-5p              | 1 |
| <i>circLMTK2</i> | miR-4679                 | 5 |
| <i>circLMTK2</i> | miR-4680-5p              | 2 |



|                  |                                  |   |
|------------------|----------------------------------|---|
| <i>circLMTK2</i> | miR-4682                         | 2 |
| <i>circLMTK2</i> | miR-4684-5p                      | 2 |
| <i>circLMTK2</i> | miR-4685-5p/6837-5p              | 3 |
| <i>circLMTK2</i> | miR-4687-3p                      | 3 |
| <i>circLMTK2</i> | miR-4688/6743-5p                 | 2 |
| <i>circLMTK2</i> | miR-4689/6858-5p                 | 3 |
| <i>circLMTK2</i> | miR-4690-5p                      | 1 |
| <i>circLMTK2</i> | miR-4691-3p                      | 1 |
| <i>circLMTK2</i> | miR-4691-5p/6792-3p              | 5 |
| <i>circLMTK2</i> | miR-4693-3p                      | 2 |
| <i>circLMTK2</i> | miR-4694-3p                      | 1 |
| <i>circLMTK2</i> | miR-4695-5p                      | 3 |
| <i>circLMTK2</i> | miR-4696                         | 1 |
| <i>circLMTK2</i> | miR-4698                         | 1 |
| <i>circLMTK2</i> | miR-4699-5p                      | 2 |
| <i>circLMTK2</i> | miR-4700-3p                      | 1 |
| <i>circLMTK2</i> | miR-4704-3p                      | 1 |
| <i>circLMTK2</i> | miR-4707-3p                      | 1 |
| <i>circLMTK2</i> | miR-4707-5p                      | 1 |
| <i>circLMTK2</i> | miR-4708-3p                      | 3 |
| <i>circLMTK2</i> | miR-4708-5p                      | 1 |
| <i>circLMTK2</i> | miR-4709-3p                      | 2 |
| <i>circLMTK2</i> | miR-4709-5p                      | 3 |
| <i>circLMTK2</i> | miR-4710                         | 2 |
| <i>circLMTK2</i> | miR-4711-3p                      | 2 |
| <i>circLMTK2</i> | miR-4711-5p                      | 2 |
| <i>circLMTK2</i> | miR-4713-5p                      | 1 |
| <i>circLMTK2</i> | miR-4715-5p                      | 1 |
| <i>circLMTK2</i> | miR-4716-3p/6794-5p              | 1 |
| <i>circLMTK2</i> | miR-4716-5p                      | 1 |
| <i>circLMTK2</i> | miR-4720-5p/4799-3p/5588-5p      | 3 |
| <i>circLMTK2</i> | miR-4721                         | 1 |
| <i>circLMTK2</i> | miR-4722-5p                      | 1 |
| <i>circLMTK2</i> | miR-4723-5p/5698/6870-5p/7111-5p | 1 |
| <i>circLMTK2</i> | miR-4724-5p                      | 1 |
| <i>circLMTK2</i> | miR-4725-5p                      | 1 |
| <i>circLMTK2</i> | miR-4726-3p                      | 2 |
| <i>circLMTK2</i> | miR-4727-5p                      | 1 |

|                  |                     |   |
|------------------|---------------------|---|
| <i>circLMTK2</i> | miR-4729            | 1 |
| <i>circLMTK2</i> | miR-4731-5p         | 5 |
| <i>circLMTK2</i> | miR-4732-3p         | 1 |
| <i>circLMTK2</i> | miR-4733-3p         | 1 |
| <i>circLMTK2</i> | miR-4734            | 1 |
| <i>circLMTK2</i> | miR-4736            | 1 |
| <i>circLMTK2</i> | miR-4738-5p         | 1 |
| <i>circLMTK2</i> | miR-4740-3p         | 1 |
| <i>circLMTK2</i> | miR-4740-5p         | 3 |
| <i>circLMTK2</i> | miR-4742-3p         | 1 |
| <i>circLMTK2</i> | miR-4742-5p         | 1 |
| <i>circLMTK2</i> | miR-4743-3p         | 3 |
| <i>circLMTK2</i> | miR-4744            | 2 |
| <i>circLMTK2</i> | miR-4746-3p         | 1 |
| <i>circLMTK2</i> | miR-4746-5p         | 1 |
| <i>circLMTK2</i> | miR-4747-3p         | 2 |
| <i>circLMTK2</i> | miR-4747-5p/5196-5p | 2 |
| <i>circLMTK2</i> | miR-4750-5p         | 3 |
| <i>circLMTK2</i> | miR-4751            | 3 |
| <i>circLMTK2</i> | miR-4753-3p         | 2 |
| <i>circLMTK2</i> | miR-4753-5p         | 1 |
| <i>circLMTK2</i> | miR-4755-3p         | 1 |
| <i>circLMTK2</i> | miR-4755-5p/5006-3p | 1 |
| <i>circLMTK2</i> | miR-4756-3p         | 2 |
| <i>circLMTK2</i> | miR-4757-3p         | 1 |
| <i>circLMTK2</i> | miR-4757-5p/6744-3p | 2 |
| <i>circLMTK2</i> | miR-4759            | 3 |
| <i>circLMTK2</i> | miR-4761-3p         | 1 |
| <i>circLMTK2</i> | miR-4761-5p         | 1 |
| <i>circLMTK2</i> | miR-4762-3p         | 2 |
| <i>circLMTK2</i> | miR-4762-5p         | 1 |
| <i>circLMTK2</i> | miR-4763-5p         | 1 |
| <i>circLMTK2</i> | miR-4764-5p         | 1 |
| <i>circLMTK2</i> | miR-4765            | 1 |
| <i>circLMTK2</i> | miR-4766-5p         | 1 |
| <i>circLMTK2</i> | miR-4768-3p         | 2 |
| <i>circLMTK2</i> | miR-4768-5p/6833-3p | 3 |
| <i>circLMTK2</i> | miR-4771            | 3 |

|                  |                     |   |
|------------------|---------------------|---|
| <i>circLMTK2</i> | miR-4772-3p         | 2 |
| <i>circLMTK2</i> | miR-4773            | 1 |
| <i>circLMTK2</i> | miR-4774-5p         | 1 |
| <i>circLMTK2</i> | miR-4778-3p         | 3 |
| <i>circLMTK2</i> | miR-4779            | 3 |
| <i>circLMTK2</i> | miR-4781-5p         | 1 |
| <i>circLMTK2</i> | miR-4782-5p/5706    | 2 |
| <i>circLMTK2</i> | miR-4785            | 2 |
| <i>circLMTK2</i> | miR-4787-5p         | 2 |
| <i>circLMTK2</i> | miR-4790-5p         | 1 |
| <i>circLMTK2</i> | miR-4792            | 2 |
| <i>circLMTK2</i> | miR-4793-3p         | 1 |
| <i>circLMTK2</i> | miR-4793-5p         | 1 |
| <i>circLMTK2</i> | miR-4796-3p         | 3 |
| <i>circLMTK2</i> | miR-4797-3p         | 1 |
| <i>circLMTK2</i> | miR-4797-5p         | 1 |
| <i>circLMTK2</i> | miR-4798-3p         | 1 |
| <i>circLMTK2</i> | miR-4798-5p         | 1 |
| <i>circLMTK2</i> | miR-4799-5p         | 2 |
| <i>circLMTK2</i> | miR-4800-5p         | 1 |
| <i>circLMTK2</i> | miR-4803            | 1 |
| <i>circLMTK2</i> | miR-483-3p.1        | 1 |
| <i>circLMTK2</i> | miR-483-3p.2        | 2 |
| <i>circLMTK2</i> | miR-484/3155        | 1 |
| <i>circLMTK2</i> | miR-485-5p          | 4 |
| <i>circLMTK2</i> | miR-486-3p          | 2 |
| <i>circLMTK2</i> | miR-486-5p          | 1 |
| <i>circLMTK2</i> | miR-488-3p          | 2 |
| <i>circLMTK2</i> | miR-489-3p          | 2 |
| <i>circLMTK2</i> | miR-492             | 2 |
| <i>circLMTK2</i> | miR-495-3p          | 1 |
| <i>circLMTK2</i> | miR-495-5p          | 1 |
| <i>circLMTK2</i> | miR-499a-3p/499b-3p | 2 |
| <i>circLMTK2</i> | miR-499a-5p         | 1 |
| <i>circLMTK2</i> | miR-499b-5p         | 1 |
| <i>circLMTK2</i> | miR-5000-3p         | 1 |
| <i>circLMTK2</i> | miR-5000-5p         | 2 |
| <i>circLMTK2</i> | miR-5001-3p         | 1 |

|                  |                             |   |
|------------------|-----------------------------|---|
| <i>circLMTK2</i> | miR-5002-3p                 | 3 |
| <i>circLMTK2</i> | miR-5003-3p                 | 1 |
| <i>circLMTK2</i> | miR-5004-5p                 | 3 |
| <i>circLMTK2</i> | miR-5007-5p                 | 7 |
| <i>circLMTK2</i> | miR-5008-3p/6737-3p/7157-3p | 4 |
| <i>circLMTK2</i> | miR-5009-3p                 | 1 |
| <i>circLMTK2</i> | miR-5009-5p/8058            | 2 |
| <i>circLMTK2</i> | miR-500a-3p                 | 1 |
| <i>circLMTK2</i> | miR-501-3p/502-3p           | 1 |
| <i>circLMTK2</i> | miR-5010-3p                 | 3 |
| <i>circLMTK2</i> | miR-5010-5p                 | 1 |
| <i>circLMTK2</i> | miR-5011-5p                 | 1 |
| <i>circLMTK2</i> | miR-503-5p                  | 2 |
| <i>circLMTK2</i> | miR-504-3p                  | 2 |
| <i>circLMTK2</i> | miR-504-5p.1                | 2 |
| <i>circLMTK2</i> | miR-505-3p.2                | 1 |
| <i>circLMTK2</i> | miR-505-5p                  | 2 |
| <i>circLMTK2</i> | miR-506-5p                  | 1 |
| <i>circLMTK2</i> | miR-508-5p                  | 4 |
| <i>circLMTK2</i> | miR-5087                    | 1 |
| <i>circLMTK2</i> | miR-5088-3p                 | 1 |
| <i>circLMTK2</i> | miR-5088-5p                 | 2 |
| <i>circLMTK2</i> | miR-5089-5p                 | 1 |
| <i>circLMTK2</i> | miR-509-3-5p/509-5p/4418    | 1 |
| <i>circLMTK2</i> | miR-5090/6775-5p            | 3 |
| <i>circLMTK2</i> | miR-5092                    | 1 |
| <i>circLMTK2</i> | miR-5094                    | 1 |
| <i>circLMTK2</i> | miR-5096                    | 1 |
| <i>circLMTK2</i> | miR-510-3p                  | 1 |
| <i>circLMTK2</i> | miR-510-5p                  | 2 |
| <i>circLMTK2</i> | miR-511-3p                  | 1 |
| <i>circLMTK2</i> | miR-513a-5p                 | 1 |
| <i>circLMTK2</i> | miR-513c-5p/514b-5p         | 2 |
| <i>circLMTK2</i> | miR-515-5p/519e-5p          | 1 |
| <i>circLMTK2</i> | miR-516a-3p/516b-3p/7162-5p | 2 |
| <i>circLMTK2</i> | miR-516a-5p                 | 1 |
| <i>circLMTK2</i> | miR-516b-5p                 | 2 |
| <i>circLMTK2</i> | miR-517-3p                  | 1 |

|                  |                                                                  |   |
|------------------|------------------------------------------------------------------|---|
| <i>circLMTK2</i> | miR-517-5p                                                       | 1 |
| <i>circLMTK2</i> | miR-518-3p                                                       | 1 |
| <i>circLMTK2</i> | miR-5187-5p                                                      | 2 |
| <i>circLMTK2</i> | miR-5189-3p                                                      | 1 |
| <i>circLMTK2</i> | miR-518a-5p/527                                                  | 1 |
| <i>circLMTK2</i> | miR-5191                                                         | 1 |
| <i>circLMTK2</i> | miR-5192                                                         | 2 |
| <i>circLMTK2</i> | miR-5193                                                         | 2 |
| <i>circLMTK2</i> | miR-5196-3p                                                      | 1 |
| <i>circLMTK2</i> | miR-5197-3p                                                      | 1 |
| <i>circLMTK2</i> | miR-519d-5p                                                      | 2 |
| <i>circLMTK2</i> | miR-520f-5p                                                      | 2 |
| <i>circLMTK2</i> | miR-520g-3p                                                      | 6 |
| <i>circLMTK2</i> | miR-520g-5p                                                      | 1 |
| <i>circLMTK2</i> | miR-522-3p                                                       | 1 |
| <i>circLMTK2</i> | miR-524-3p/525-3p                                                | 1 |
| <i>circLMTK2</i> | miR-525-5p                                                       | 1 |
| <i>circLMTK2</i> | miR-526b-5p                                                      | 2 |
| <i>circLMTK2</i> | miR-532-3p                                                       | 2 |
| <i>circLMTK2</i> | miR-539-3p                                                       | 1 |
| <i>circLMTK2</i> | miR-542-3p                                                       | 2 |
| <i>circLMTK2</i> | miR-542-5p                                                       | 4 |
| <i>circLMTK2</i> | miR-543                                                          | 1 |
| <i>circLMTK2</i> | miR-544a                                                         | 1 |
| <i>circLMTK2</i> | miR-544b                                                         | 1 |
| <i>circLMTK2</i> | miR-545-3p                                                       | 1 |
| <i>circLMTK2</i> | miR-545-5p                                                       | 1 |
| <i>circLMTK2</i> | miR-548ac/548bb-3p/548d-3p/548h-3p/548z                          | 1 |
| <i>circLMTK2</i> | miR-548ad-3p                                                     | 1 |
| <i>circLMTK2</i> | miR-548ah-5p/3609                                                | 5 |
| <i>circLMTK2</i> | miR-548ao-5p/548ax                                               | 1 |
| <i>circLMTK2</i> | miR-548ap-3p/548aa/548t-3p                                       | 1 |
| <i>circLMTK2</i> | miR-548aq-3p/548am-3p/548aj-3p/548ak-3p/548ae-3p/548j-3p/548x-3p | 1 |
| <i>circLMTK2</i> | miR-548as-3p                                                     | 1 |
| <i>circLMTK2</i> | miR-548at-5p                                                     | 1 |
| <i>circLMTK2</i> | miR-548au-3p                                                     | 1 |
| <i>circLMTK2</i> | miR-548av-3p                                                     | 2 |
| <i>circLMTK2</i> | miR-548aw                                                        | 1 |

|                  |                                               |   |
|------------------|-----------------------------------------------|---|
| <i>circLMTK2</i> | miR-548ay-3p/548at-3p                         | 1 |
| <i>circLMTK2</i> | miR-548az-3p/548ar-3p/548a-3p/548e-3p/548f-3p | 1 |
| <i>circLMTK2</i> | miR-548az-5p/548t-5p                          | 1 |
| <i>circLMTK2</i> | miR-548b-3p                                   | 1 |
| <i>circLMTK2</i> | miR-548c-3p                                   | 1 |
| <i>circLMTK2</i> | miR-548e-5p                                   | 1 |
| <i>circLMTK2</i> | miR-548g-3p                                   | 4 |
| <i>circLMTK2</i> | miR-548m                                      | 2 |
| <i>circLMTK2</i> | miR-548n                                      | 1 |
| <i>circLMTK2</i> | miR-548p                                      | 1 |
| <i>circLMTK2</i> | miR-548q                                      | 3 |
| <i>circLMTK2</i> | miR-548u/7161-5p                              | 1 |
| <i>circLMTK2</i> | miR-549a                                      | 1 |
| <i>circLMTK2</i> | miR-550a-3-5p/550a-5p/1271-3p                 | 2 |
| <i>circLMTK2</i> | miR-550b-2-5p                                 | 1 |
| <i>circLMTK2</i> | miR-552-3p                                    | 1 |
| <i>circLMTK2</i> | miR-555                                       | 1 |
| <i>circLMTK2</i> | miR-556-5p                                    | 1 |
| <i>circLMTK2</i> | miR-5571-5p                                   | 1 |
| <i>circLMTK2</i> | miR-5572                                      | 2 |
| <i>circLMTK2</i> | miR-5579-3p                                   | 1 |
| <i>circLMTK2</i> | miR-558                                       | 3 |
| <i>circLMTK2</i> | miR-5580-5p                                   | 5 |
| <i>circLMTK2</i> | miR-5581-3p                                   | 1 |
| <i>circLMTK2</i> | miR-5582-3p                                   | 1 |
| <i>circLMTK2</i> | miR-5584-3p                                   | 3 |
| <i>circLMTK2</i> | miR-5585-3p                                   | 1 |
| <i>circLMTK2</i> | miR-5585-5p                                   | 1 |
| <i>circLMTK2</i> | miR-5586-5p                                   | 1 |
| <i>circLMTK2</i> | miR-5587-3p                                   | 1 |
| <i>circLMTK2</i> | miR-5587-5p                                   | 2 |
| <i>circLMTK2</i> | miR-5588-3p                                   | 2 |
| <i>circLMTK2</i> | miR-5589-3p                                   | 1 |
| <i>circLMTK2</i> | miR-5589-5p                                   | 5 |
| <i>circLMTK2</i> | miR-561-3p                                    | 1 |
| <i>circLMTK2</i> | miR-564                                       | 1 |
| <i>circLMTK2</i> | miR-5680                                      | 1 |
| <i>circLMTK2</i> | miR-5681a                                     | 3 |

|                  |                 |   |
|------------------|-----------------|---|
| <i>circLMTK2</i> | miR-5690        | 1 |
| <i>circLMTK2</i> | miR-5692a       | 1 |
| <i>circLMTK2</i> | miR-5692bc      | 1 |
| <i>circLMTK2</i> | miR-5693        | 1 |
| <i>circLMTK2</i> | miR-5694        | 1 |
| <i>circLMTK2</i> | miR-5695        | 2 |
| <i>circLMTK2</i> | miR-5696        | 1 |
| <i>circLMTK2</i> | miR-5700        | 1 |
| <i>circLMTK2</i> | miR-5701        | 2 |
| <i>circLMTK2</i> | miR-5702        | 2 |
| <i>circLMTK2</i> | miR-5705        | 3 |
| <i>circLMTK2</i> | miR-5708        | 1 |
| <i>circLMTK2</i> | miR-571         | 1 |
| <i>circLMTK2</i> | miR-574-3p      | 1 |
| <i>circLMTK2</i> | miR-574-5p      | 1 |
| <i>circLMTK2</i> | miR-575/4676-5p | 1 |
| <i>circLMTK2</i> | miR-576-5p      | 2 |
| <i>circLMTK2</i> | miR-578         | 1 |
| <i>circLMTK2</i> | miR-579-3p      | 1 |
| <i>circLMTK2</i> | miR-580-3p      | 1 |
| <i>circLMTK2</i> | miR-582-3p      | 2 |
| <i>circLMTK2</i> | miR-583         | 2 |
| <i>circLMTK2</i> | miR-584-3p      | 1 |
| <i>circLMTK2</i> | miR-585-3p      | 1 |
| <i>circLMTK2</i> | miR-587         | 1 |
| <i>circLMTK2</i> | miR-589-3p      | 1 |
| <i>circLMTK2</i> | miR-591         | 1 |
| <i>circLMTK2</i> | miR-592         | 2 |
| <i>circLMTK2</i> | miR-593-3p      | 3 |
| <i>circLMTK2</i> | miR-595         | 1 |
| <i>circLMTK2</i> | miR-596         | 3 |
| <i>circLMTK2</i> | miR-597-3p      | 2 |
| <i>circLMTK2</i> | miR-597-5p      | 1 |
| <i>circLMTK2</i> | miR-598-5p      | 2 |
| <i>circLMTK2</i> | miR-599         | 2 |
| <i>circLMTK2</i> | miR-604         | 3 |
| <i>circLMTK2</i> | miR-605-3p      | 1 |
| <i>circLMTK2</i> | miR-607         | 1 |

|                  |                                       |   |
|------------------|---------------------------------------|---|
| <i>circLMTK2</i> | miR-6071                              | 1 |
| <i>circLMTK2</i> | miR-6072/6891-3p                      | 1 |
| <i>circLMTK2</i> | miR-6076/6797-3p                      | 1 |
| <i>circLMTK2</i> | miR-6077                              | 2 |
| <i>circLMTK2</i> | miR-6079                              | 2 |
| <i>circLMTK2</i> | miR-608/4651                          | 1 |
| <i>circLMTK2</i> | miR-6082                              | 1 |
| <i>circLMTK2</i> | miR-6085/6813-5p                      | 2 |
| <i>circLMTK2</i> | miR-6090                              | 2 |
| <i>circLMTK2</i> | miR-611/3131                          | 1 |
| <i>circLMTK2</i> | miR-612/1285-3p/3187-5p/5189-5p/68602 | 2 |
| <i>circLMTK2</i> | miR-6126                              | 1 |
| <i>circLMTK2</i> | miR-6128                              | 1 |
| <i>circLMTK2</i> | miR-6131                              | 3 |
| <i>circLMTK2</i> | miR-6132/6836-5p                      | 2 |
| <i>circLMTK2</i> | miR-6134                              | 1 |
| <i>circLMTK2</i> | miR-615-5p                            | 2 |
| <i>circLMTK2</i> | miR-616-3p                            | 1 |
| <i>circLMTK2</i> | miR-6165                              | 1 |
| <i>circLMTK2</i> | miR-617                               | 2 |
| <i>circLMTK2</i> | miR-618                               | 1 |
| <i>circLMTK2</i> | miR-619-5p/6506-5p                    | 4 |
| <i>circLMTK2</i> | miR-622                               | 1 |
| <i>circLMTK2</i> | miR-623                               | 1 |
| <i>circLMTK2</i> | miR-625-5p                            | 1 |
| <i>circLMTK2</i> | miR-626/6876-3p                       | 3 |
| <i>circLMTK2</i> | miR-627-3p                            | 4 |
| <i>circLMTK2</i> | miR-627-5p                            | 5 |
| <i>circLMTK2</i> | miR-628-5p                            | 2 |
| <i>circLMTK2</i> | miR-629-3p                            | 1 |
| <i>circLMTK2</i> | miR-629-5p                            | 2 |
| <i>circLMTK2</i> | miR-631/3661                          | 1 |
| <i>circLMTK2</i> | miR-632/4288                          | 3 |
| <i>circLMTK2</i> | miR-633                               | 1 |
| <i>circLMTK2</i> | miR-634                               | 1 |
| <i>circLMTK2</i> | miR-636                               | 2 |
| <i>circLMTK2</i> | miR-637                               | 4 |
| <i>circLMTK2</i> | miR-639                               | 1 |



|                  |                  |   |
|------------------|------------------|---|
| <i>circLMTK2</i> | miR-641/3617-5p  | 1 |
| <i>circLMTK2</i> | miR-642b-5p      | 1 |
| <i>circLMTK2</i> | miR-646          | 2 |
| <i>circLMTK2</i> | miR-647          | 4 |
| <i>circLMTK2</i> | miR-648          | 1 |
| <i>circLMTK2</i> | miR-6499-3p      | 1 |
| <i>circLMTK2</i> | miR-6501-3p      | 1 |
| <i>circLMTK2</i> | miR-6505-3p      | 2 |
| <i>circLMTK2</i> | miR-6507-3p      | 3 |
| <i>circLMTK2</i> | miR-6508-3p      | 2 |
| <i>circLMTK2</i> | miR-6509-3p      | 3 |
| <i>circLMTK2</i> | miR-6510-5p      | 1 |
| <i>circLMTK2</i> | miR-6511-3p      | 1 |
| <i>circLMTK2</i> | miR-6511-5p      | 2 |
| <i>circLMTK2</i> | miR-6513-5p      | 3 |
| <i>circLMTK2</i> | miR-6515-5p      | 1 |
| <i>circLMTK2</i> | miR-653-3p       | 2 |
| <i>circLMTK2</i> | miR-654-5p       | 1 |
| <i>circLMTK2</i> | miR-655-5p       | 1 |
| <i>circLMTK2</i> | miR-657          | 5 |
| <i>circLMTK2</i> | miR-659-3p       | 1 |
| <i>circLMTK2</i> | miR-659-5p       | 2 |
| <i>circLMTK2</i> | miR-660-3p       | 2 |
| <i>circLMTK2</i> | miR-661          | 1 |
| <i>circLMTK2</i> | miR-663b         | 3 |
| <i>circLMTK2</i> | miR-664a-5p/4794 | 8 |
| <i>circLMTK2</i> | miR-665          | 1 |
| <i>circLMTK2</i> | miR-668-3p       | 3 |
| <i>circLMTK2</i> | miR-670-3p       | 1 |
| <i>circLMTK2</i> | miR-670-5p       | 3 |
| <i>circLMTK2</i> | miR-671-5p       | 1 |
| <i>circLMTK2</i> | miR-6715b-3p     | 1 |
| <i>circLMTK2</i> | miR-6716-5p      | 1 |
| <i>circLMTK2</i> | miR-6717-5p      | 2 |
| <i>circLMTK2</i> | miR-6719-3p      | 3 |
| <i>circLMTK2</i> | miR-6720-5p      | 2 |
| <i>circLMTK2</i> | miR-6721-5p      | 3 |
| <i>circLMTK2</i> | miR-6726-3p      | 1 |

|                  |                             |   |
|------------------|-----------------------------|---|
| <i>circLMTK2</i> | miR-6727-5p                 | 4 |
| <i>circLMTK2</i> | miR-6728-3p                 | 2 |
| <i>circLMTK2</i> | miR-6728-5p                 | 1 |
| <i>circLMTK2</i> | miR-6729-3p                 | 2 |
| <i>circLMTK2</i> | miR-6730-3p                 | 3 |
| <i>circLMTK2</i> | miR-6730-5p                 | 3 |
| <i>circLMTK2</i> | miR-6731-5p/8085            | 2 |
| <i>circLMTK2</i> | miR-6732-3p                 | 1 |
| <i>circLMTK2</i> | miR-6732-5p                 | 1 |
| <i>circLMTK2</i> | miR-6734-3p                 | 1 |
| <i>circLMTK2</i> | miR-6735-3p                 | 1 |
| <i>circLMTK2</i> | miR-6737-5p/6812-5p/6819-5p | 2 |
| <i>circLMTK2</i> | miR-6738-3p                 | 1 |
| <i>circLMTK2</i> | miR-6740-3p                 | 2 |
| <i>circLMTK2</i> | miR-6741-3p                 | 2 |
| <i>circLMTK2</i> | miR-6742-3p                 | 3 |
| <i>circLMTK2</i> | miR-6743-3p                 | 3 |
| <i>circLMTK2</i> | miR-6744-5p                 | 1 |
| <i>circLMTK2</i> | miR-6746-3p                 | 2 |
| <i>circLMTK2</i> | miR-6746-5p                 | 4 |
| <i>circLMTK2</i> | miR-6747-5p                 | 1 |
| <i>circLMTK2</i> | miR-6748-3p                 | 1 |
| <i>circLMTK2</i> | miR-6748-5p                 | 3 |
| <i>circLMTK2</i> | miR-6749-3p                 | 5 |
| <i>circLMTK2</i> | miR-6749-5p                 | 2 |
| <i>circLMTK2</i> | miR-6751-5p/6803-5p         | 1 |
| <i>circLMTK2</i> | miR-6752-3p                 | 1 |
| <i>circLMTK2</i> | miR-6752-5p/6842-5p/7110-5p | 1 |
| <i>circLMTK2</i> | miR-6753-3p/7107-3p         | 1 |
| <i>circLMTK2</i> | miR-6758-5p/6856-5p         | 2 |
| <i>circLMTK2</i> | miR-6759-3p                 | 1 |
| <i>circLMTK2</i> | miR-6759-5p                 | 3 |
| <i>circLMTK2</i> | miR-676-3p                  | 3 |
| <i>circLMTK2</i> | miR-676-5p                  | 1 |
| <i>circLMTK2</i> | miR-6760-3p                 | 2 |
| <i>circLMTK2</i> | miR-6761-5p                 | 3 |
| <i>circLMTK2</i> | miR-6762-3p                 | 3 |
| <i>circLMTK2</i> | miR-6762-5p/6845-5p         | 1 |

|                  |                       |   |
|------------------|-----------------------|---|
| <i>circLMTK2</i> | miR-6763-3p           | 1 |
| <i>circLMTK2</i> | miR-6765-3p           | 2 |
| <i>circLMTK2</i> | miR-6765-5p           | 1 |
| <i>circLMTK2</i> | miR-6767-3p           | 2 |
| <i>circLMTK2</i> | miR-6767-5p           | 2 |
| <i>circLMTK2</i> | miR-6769a-5p/6769b-5p | 1 |
| <i>circLMTK2</i> | miR-6770-5p           | 1 |
| <i>circLMTK2</i> | miR-6771-5p           | 3 |
| <i>circLMTK2</i> | miR-6772-3p           | 2 |
| <i>circLMTK2</i> | miR-6773-3p           | 2 |
| <i>circLMTK2</i> | miR-6776-3p           | 1 |
| <i>circLMTK2</i> | miR-6776-5p           | 1 |
| <i>circLMTK2</i> | miR-6777-3p           | 2 |
| <i>circLMTK2</i> | miR-6777-5p/6889-5p   | 2 |
| <i>circLMTK2</i> | miR-6778-3p           | 1 |
| <i>circLMTK2</i> | miR-6780a-3p          | 1 |
| <i>circLMTK2</i> | miR-6782-3p           | 1 |
| <i>circLMTK2</i> | miR-6782-5p           | 1 |
| <i>circLMTK2</i> | miR-6784-3p/6862-3p   | 1 |
| <i>circLMTK2</i> | miR-6784-5p           | 2 |
| <i>circLMTK2</i> | miR-6785-3p           | 3 |
| <i>circLMTK2</i> | miR-6788-3p           | 1 |
| <i>circLMTK2</i> | miR-6789-5p           | 1 |
| <i>circLMTK2</i> | miR-6790-3p           | 2 |
| <i>circLMTK2</i> | miR-6791-3p/6829-3p   | 1 |
| <i>circLMTK2</i> | miR-6793-5p           | 3 |
| <i>circLMTK2</i> | miR-6794-3p           | 1 |
| <i>circLMTK2</i> | miR-6795-5p/6887-5p   | 1 |
| <i>circLMTK2</i> | miR-6796-3p           | 4 |
| <i>circLMTK2</i> | miR-6796-5p           | 3 |
| <i>circLMTK2</i> | miR-6798-5p           | 3 |
| <i>circLMTK2</i> | miR-6799-5p           | 3 |
| <i>circLMTK2</i> | miR-6800-3p           | 1 |
| <i>circLMTK2</i> | miR-6801-3p/6810-3p   | 1 |
| <i>circLMTK2</i> | miR-6802-3p           | 2 |
| <i>circLMTK2</i> | miR-6803-3p           | 2 |
| <i>circLMTK2</i> | miR-6804-3p           | 1 |
| <i>circLMTK2</i> | miR-6804-5p           | 1 |

|                  |                     |   |
|------------------|---------------------|---|
| <i>circLMTK2</i> | miR-6805-5p         | 1 |
| <i>circLMTK2</i> | miR-6806-5p         | 1 |
| <i>circLMTK2</i> | miR-6807-5p         | 1 |
| <i>circLMTK2</i> | miR-6808-3p         | 2 |
| <i>circLMTK2</i> | miR-6809-3p         | 3 |
| <i>circLMTK2</i> | miR-6809-5p         | 2 |
| <i>circLMTK2</i> | miR-6810-5p         | 3 |
| <i>circLMTK2</i> | miR-6811-3p         | 2 |
| <i>circLMTK2</i> | miR-6815-3p         | 4 |
| <i>circLMTK2</i> | miR-6815-5p/6865-5p | 1 |
| <i>circLMTK2</i> | miR-6817-3p         | 3 |
| <i>circLMTK2</i> | miR-6818-3p         | 2 |
| <i>circLMTK2</i> | miR-6819-3p/6877-3p | 1 |
| <i>circLMTK2</i> | miR-6820-5p         | 1 |
| <i>circLMTK2</i> | miR-6821-3p         | 2 |
| <i>circLMTK2</i> | miR-6822-3p         | 4 |
| <i>circLMTK2</i> | miR-6823-5p         | 1 |
| <i>circLMTK2</i> | miR-6824-5p         | 1 |
| <i>circLMTK2</i> | miR-6825-5p         | 3 |
| <i>circLMTK2</i> | miR-6826-3p         | 1 |
| <i>circLMTK2</i> | miR-6827-5p         | 2 |
| <i>circLMTK2</i> | miR-6828-3p         | 1 |
| <i>circLMTK2</i> | miR-6828-5p         | 1 |
| <i>circLMTK2</i> | miR-6829-5p         | 3 |
| <i>circLMTK2</i> | miR-6830-3p         | 2 |
| <i>circLMTK2</i> | miR-6830-5p         | 2 |
| <i>circLMTK2</i> | miR-6832-3p         | 1 |
| <i>circLMTK2</i> | miR-6834-3p         | 2 |
| <i>circLMTK2</i> | miR-6835-5p         | 1 |
| <i>circLMTK2</i> | miR-6836-3p         | 1 |
| <i>circLMTK2</i> | miR-6838-3p         | 5 |
| <i>circLMTK2</i> | miR-6839-3p         | 2 |
| <i>circLMTK2</i> | miR-6840-3p         | 2 |
| <i>circLMTK2</i> | miR-6842-3p         | 4 |
| <i>circLMTK2</i> | miR-6843-3p/6848-3p | 1 |
| <i>circLMTK2</i> | miR-6844            | 3 |
| <i>circLMTK2</i> | miR-6846-5p/6848-5p | 2 |
| <i>circLMTK2</i> | miR-6847-5p         | 1 |

|                  |             |   |
|------------------|-------------|---|
| <i>circLMTK2</i> | miR-6849-3p | 1 |
| <i>circLMTK2</i> | miR-6851-3p | 2 |
| <i>circLMTK2</i> | miR-6852-5p | 3 |
| <i>circLMTK2</i> | miR-6853-5p | 1 |
| <i>circLMTK2</i> | miR-6854-3p | 1 |
| <i>circLMTK2</i> | miR-6854-5p | 2 |
| <i>circLMTK2</i> | miR-6856-3p | 2 |
| <i>circLMTK2</i> | miR-6857-3p | 2 |
| <i>circLMTK2</i> | miR-6857-5p | 3 |
| <i>circLMTK2</i> | miR-6858-3p | 1 |
| <i>circLMTK2</i> | miR-6861-3p | 2 |
| <i>circLMTK2</i> | miR-6861-5p | 1 |
| <i>circLMTK2</i> | miR-6864-5p | 1 |
| <i>circLMTK2</i> | miR-6865-3p | 2 |
| <i>circLMTK2</i> | miR-6867-3p | 1 |
| <i>circLMTK2</i> | miR-6868-3p | 2 |
| <i>circLMTK2</i> | miR-6868-5p | 3 |
| <i>circLMTK2</i> | miR-6869-3p | 1 |
| <i>circLMTK2</i> | miR-6870-3p | 1 |
| <i>circLMTK2</i> | miR-6873-3p | 3 |
| <i>circLMTK2</i> | miR-6873-5p | 1 |
| <i>circLMTK2</i> | miR-6875-3p | 3 |
| <i>circLMTK2</i> | miR-6878-3p | 2 |
| <i>circLMTK2</i> | miR-6878-5p | 2 |
| <i>circLMTK2</i> | miR-6879-3p | 2 |
| <i>circLMTK2</i> | miR-6880-5p | 1 |
| <i>circLMTK2</i> | miR-6881-3p | 1 |
| <i>circLMTK2</i> | miR-6881-5p | 1 |
| <i>circLMTK2</i> | miR-6883-3p | 1 |
| <i>circLMTK2</i> | miR-6885-3p | 3 |
| <i>circLMTK2</i> | miR-6886-5p | 3 |
| <i>circLMTK2</i> | miR-6888-3p | 1 |
| <i>circLMTK2</i> | miR-6888-5p | 2 |
| <i>circLMTK2</i> | miR-6889-3p | 4 |
| <i>circLMTK2</i> | miR-6890-3p | 1 |
| <i>circLMTK2</i> | miR-6890-5p | 1 |
| <i>circLMTK2</i> | miR-6894-5p | 2 |
| <i>circLMTK2</i> | miR-6895-3p | 3 |

|                  |                           |   |
|------------------|---------------------------|---|
| <i>circLMTK2</i> | miR-6895-5p               | 1 |
| <i>circLMTK2</i> | miR-7-5p                  | 2 |
| <i>circLMTK2</i> | miR-7106-3p               | 1 |
| <i>circLMTK2</i> | miR-7106-5p               | 3 |
| <i>circLMTK2</i> | miR-7108-5p               | 1 |
| <i>circLMTK2</i> | miR-7109-3p               | 3 |
| <i>circLMTK2</i> | miR-7109-5p               | 1 |
| <i>circLMTK2</i> | miR-711                   | 1 |
| <i>circLMTK2</i> | miR-7110-3p               | 3 |
| <i>circLMTK2</i> | miR-7111-3p               | 1 |
| <i>circLMTK2</i> | miR-7112-3p               | 2 |
| <i>circLMTK2</i> | miR-7112-5p               | 1 |
| <i>circLMTK2</i> | miR-7113-3p               | 2 |
| <i>circLMTK2</i> | miR-7113-5p               | 3 |
| <i>circLMTK2</i> | miR-7114-5p               | 3 |
| <i>circLMTK2</i> | miR-7150                  | 1 |
| <i>circLMTK2</i> | miR-7151-5p               | 2 |
| <i>circLMTK2</i> | miR-7152-3p               | 2 |
| <i>circLMTK2</i> | miR-7152-5p               | 2 |
| <i>circLMTK2</i> | miR-7154-3p               | 2 |
| <i>circLMTK2</i> | miR-7155-5p               | 4 |
| <i>circLMTK2</i> | miR-7156-3p               | 2 |
| <i>circLMTK2</i> | miR-7158-3p               | 1 |
| <i>circLMTK2</i> | miR-7158-5p               | 1 |
| <i>circLMTK2</i> | miR-7159-5p               | 1 |
| <i>circLMTK2</i> | miR-7160-3p               | 1 |
| <i>circLMTK2</i> | miR-7160-5p               | 2 |
| <i>circLMTK2</i> | miR-7162-3p               | 2 |
| <i>circLMTK2</i> | miR-7515                  | 1 |
| <i>circLMTK2</i> | miR-758-3p                | 1 |
| <i>circLMTK2</i> | miR-758-5p                | 3 |
| <i>circLMTK2</i> | miR-759                   | 4 |
| <i>circLMTK2</i> | miR-760                   | 4 |
| <i>circLMTK2</i> | miR-762/4492/4498/5001-5p | 3 |
| <i>circLMTK2</i> | miR-764                   | 2 |
| <i>circLMTK2</i> | miR-765                   | 2 |
| <i>circLMTK2</i> | miR-766-3p                | 5 |
| <i>circLMTK2</i> | miR-766-5p                | 2 |

|                  |              |   |
|------------------|--------------|---|
| <i>circLMTK2</i> | miR-767-3p   | 2 |
| <i>circLMTK2</i> | miR-7703     | 1 |
| <i>circLMTK2</i> | miR-7704     | 2 |
| <i>circLMTK2</i> | miR-7705     | 1 |
| <i>circLMTK2</i> | miR-7706     | 1 |
| <i>circLMTK2</i> | miR-7843-3p  | 1 |
| <i>circLMTK2</i> | miR-7845-5p  | 4 |
| <i>circLMTK2</i> | miR-7847-3p  | 1 |
| <i>circLMTK2</i> | miR-7849-3p  | 1 |
| <i>circLMTK2</i> | miR-7850-5p  | 1 |
| <i>circLMTK2</i> | miR-7854-3p  | 1 |
| <i>circLMTK2</i> | miR-7855-5p  | 2 |
| <i>circLMTK2</i> | miR-7973     | 1 |
| <i>circLMTK2</i> | miR-7974     | 3 |
| <i>circLMTK2</i> | miR-7976     | 1 |
| <i>circLMTK2</i> | miR-7977     | 2 |
| <i>circLMTK2</i> | miR-7978     | 3 |
| <i>circLMTK2</i> | miR-802      | 1 |
| <i>circLMTK2</i> | miR-8053     | 2 |
| <i>circLMTK2</i> | miR-8057     | 5 |
| <i>circLMTK2</i> | miR-8063     | 1 |
| <i>circLMTK2</i> | miR-8064     | 1 |
| <i>circLMTK2</i> | miR-8065     | 2 |
| <i>circLMTK2</i> | miR-8068     | 1 |
| <i>circLMTK2</i> | miR-8069     | 1 |
| <i>circLMTK2</i> | miR-8070     | 1 |
| <i>circLMTK2</i> | miR-8071     | 1 |
| <i>circLMTK2</i> | miR-8075     | 1 |
| <i>circLMTK2</i> | miR-8077     | 2 |
| <i>circLMTK2</i> | miR-8081     | 1 |
| <i>circLMTK2</i> | miR-8083     | 3 |
| <i>circLMTK2</i> | miR-8087     | 2 |
| <i>circLMTK2</i> | miR-8088     | 2 |
| <i>circLMTK2</i> | miR-873-3p   | 2 |
| <i>circLMTK2</i> | miR-873-5p.1 | 1 |
| <i>circLMTK2</i> | miR-873-5p.2 | 1 |
| <i>circLMTK2</i> | miR-874-3p   | 1 |
| <i>circLMTK2</i> | miR-874-5p   | 1 |

|                  |                              |   |
|------------------|------------------------------|---|
| <i>circLMTK2</i> | miR-877-3p                   | 9 |
| <i>circLMTK2</i> | miR-885-3p                   | 2 |
| <i>circLMTK2</i> | miR-885-5p                   | 1 |
| <i>circLMTK2</i> | miR-887-3p                   | 1 |
| <i>circLMTK2</i> | miR-887-5p                   | 3 |
| <i>circLMTK2</i> | miR-888-3p                   | 2 |
| <i>circLMTK2</i> | miR-890                      | 1 |
| <i>circLMTK2</i> | miR-891a-3p                  | 1 |
| <i>circLMTK2</i> | miR-892-5p                   | 1 |
| <i>circLMTK2</i> | miR-892a                     | 2 |
| <i>circLMTK2</i> | miR-892b                     | 1 |
| <i>circLMTK2</i> | miR-9-5p                     | 3 |
| <i>circLMTK2</i> | miR-920/4300/5591-5p/6726-5p | 2 |
| <i>circLMTK2</i> | miR-922                      | 2 |
| <i>circLMTK2</i> | miR-924                      | 5 |
| <i>circLMTK2</i> | miR-92a-1-5p                 | 1 |
| <i>circLMTK2</i> | miR-92a-2-5p                 | 1 |
| <i>circLMTK2</i> | miR-92b-5p                   | 1 |
| <i>circLMTK2</i> | miR-93-3p                    | 5 |
| <i>circLMTK2</i> | miR-935                      | 1 |
| <i>circLMTK2</i> | miR-936                      | 1 |
| <i>circLMTK2</i> | miR-937-5p                   | 5 |
| <i>circLMTK2</i> | miR-939-3p                   | 3 |
| <i>circLMTK2</i> | miR-939-5p/1343-5p           | 3 |
| <i>circLMTK2</i> | miR-940/6808-5p/6893-5p      | 3 |
| <i>circLMTK2</i> | miR-942-3p                   | 1 |
| <i>circLMTK2</i> | miR-942-5p                   | 3 |
| <i>circLMTK2</i> | miR-943                      | 5 |
| <i>circLMTK2</i> | miR-944                      | 1 |
| <i>circLMTK2</i> | miR-95-3p                    | 1 |
| <i>circLMTK2</i> | miR-95-5p                    | 1 |
| <i>circLMTK2</i> | miR-99-3p                    | 4 |
| <i>circLPAR1</i> | miR-103a-2-5p                | 1 |
| <i>circLPAR1</i> | miR-1227-5p                  | 1 |
| <i>circLPAR1</i> | miR-124-5p                   | 1 |
| <i>circLPAR1</i> | miR-1266-5p/4518             | 1 |
| <i>circLPAR1</i> | miR-1268a/1268b              | 1 |
| <i>circLPAR1</i> | miR-127-5p                   | 1 |



|                  |                     |   |
|------------------|---------------------|---|
| <i>circLPAR1</i> | miR-1283            | 1 |
| <i>circLPAR1</i> | miR-1288-3p         | 1 |
| <i>circLPAR1</i> | miR-1306-3p         | 1 |
| <i>circLPAR1</i> | miR-1306-5p         | 2 |
| <i>circLPAR1</i> | miR-135-5p          | 1 |
| <i>circLPAR1</i> | miR-140-3p.1        | 1 |
| <i>circLPAR1</i> | miR-140-3p.2        | 1 |
| <i>circLPAR1</i> | miR-148b-5p/6874-3p | 1 |
| <i>circLPAR1</i> | miR-1825            | 1 |
| <i>circLPAR1</i> | miR-188-5p          | 1 |
| <i>circLPAR1</i> | miR-1911-5p         | 1 |
| <i>circLPAR1</i> | miR-194-3p          | 1 |
| <i>circLPAR1</i> | miR-197-3p          | 1 |
| <i>circLPAR1</i> | miR-199-5p          | 1 |
| <i>circLPAR1</i> | miR-205-3p          | 1 |
| <i>circLPAR1</i> | miR-2054            | 1 |
| <i>circLPAR1</i> | miR-215-3p          | 1 |
| <i>circLPAR1</i> | miR-2355-5p         | 1 |
| <i>circLPAR1</i> | miR-27-3p           | 1 |
| <i>circLPAR1</i> | miR-29a-5p          | 1 |
| <i>circLPAR1</i> | miR-3138            | 1 |
| <i>circLPAR1</i> | miR-3151-3p         | 1 |
| <i>circLPAR1</i> | miR-3160-3p         | 1 |
| <i>circLPAR1</i> | miR-3168            | 1 |
| <i>circLPAR1</i> | miR-3169            | 1 |
| <i>circLPAR1</i> | miR-3180-3p         | 1 |
| <i>circLPAR1</i> | miR-3189-5p         | 1 |
| <i>circLPAR1</i> | miR-3192-3p         | 2 |
| <i>circLPAR1</i> | miR-3200-5p         | 2 |
| <i>circLPAR1</i> | miR-339-5p          | 1 |
| <i>circLPAR1</i> | miR-34a-3p          | 1 |
| <i>circLPAR1</i> | miR-3617-3p         | 1 |
| <i>circLPAR1</i> | miR-3664-3p         | 1 |
| <i>circLPAR1</i> | miR-3675-3p         | 1 |
| <i>circLPAR1</i> | miR-3681-5p         | 1 |
| <i>circLPAR1</i> | miR-3682-5p         | 1 |
| <i>circLPAR1</i> | miR-383-5p.1        | 1 |
| <i>circLPAR1</i> | miR-3920            | 1 |

|                  |                             |   |
|------------------|-----------------------------|---|
| <i>circLPAR1</i> | miR-3927-5p                 | 1 |
| <i>circLPAR1</i> | miR-3928-5p/6806-3p         | 1 |
| <i>circLPAR1</i> | miR-3941                    | 1 |
| <i>circLPAR1</i> | miR-3943                    | 1 |
| <i>circLPAR1</i> | miR-4279                    | 1 |
| <i>circLPAR1</i> | miR-4282                    | 1 |
| <i>circLPAR1</i> | miR-4291                    | 1 |
| <i>circLPAR1</i> | miR-4303                    | 1 |
| <i>circLPAR1</i> | miR-4314                    | 1 |
| <i>circLPAR1</i> | miR-4323                    | 1 |
| <i>circLPAR1</i> | miR-4487                    | 1 |
| <i>circLPAR1</i> | miR-4513/6855-3p            | 1 |
| <i>circLPAR1</i> | miR-4515                    | 1 |
| <i>circLPAR1</i> | miR-4659a-5p/4659b-5p       | 1 |
| <i>circLPAR1</i> | miR-4667-5p/4700-5p/8089    | 1 |
| <i>circLPAR1</i> | miR-4672                    | 1 |
| <i>circLPAR1</i> | miR-4682                    | 1 |
| <i>circLPAR1</i> | miR-4684-5p                 | 1 |
| <i>circLPAR1</i> | miR-4690-3p/5685            | 1 |
| <i>circLPAR1</i> | miR-4713-5p                 | 1 |
| <i>circLPAR1</i> | miR-4740-5p                 | 1 |
| <i>circLPAR1</i> | miR-4758-3p                 | 1 |
| <i>circLPAR1</i> | miR-4759                    | 1 |
| <i>circLPAR1</i> | miR-4769-3p/6817-5p         | 1 |
| <i>circLPAR1</i> | miR-4772-5p                 | 1 |
| <i>circLPAR1</i> | miR-4775                    | 1 |
| <i>circLPAR1</i> | miR-4797-5p                 | 1 |
| <i>circLPAR1</i> | miR-4800-5p                 | 1 |
| <i>circLPAR1</i> | miR-4804-5p                 | 1 |
| <i>circLPAR1</i> | miR-486-5p                  | 1 |
| <i>circLPAR1</i> | miR-5000-3p                 | 1 |
| <i>circLPAR1</i> | miR-5092                    | 1 |
| <i>circLPAR1</i> | miR-5096                    | 1 |
| <i>circLPAR1</i> | miR-513a-3p/513c-3p/3606-3p | 1 |
| <i>circLPAR1</i> | miR-513a-5p                 | 1 |
| <i>circLPAR1</i> | miR-548p                    | 1 |
| <i>circLPAR1</i> | miR-5571-3p                 | 1 |
| <i>circLPAR1</i> | miR-558                     | 1 |

|                  |                  |   |
|------------------|------------------|---|
| <i>circLPAR1</i> | miR-5584-3p      | 1 |
| <i>circLPAR1</i> | miR-5590-5p      | 1 |
| <i>circLPAR1</i> | miR-5693         | 1 |
| <i>circLPAR1</i> | miR-5699-5p      | 1 |
| <i>circLPAR1</i> | miR-585-3p       | 1 |
| <i>circLPAR1</i> | miR-587          | 1 |
| <i>circLPAR1</i> | miR-604          | 1 |
| <i>circLPAR1</i> | miR-6076/6797-3p | 1 |
| <i>circLPAR1</i> | miR-617          | 2 |
| <i>circLPAR1</i> | miR-624-5p       | 1 |
| <i>circLPAR1</i> | miR-626/6876-3p  | 1 |
| <i>circLPAR1</i> | miR-629-3p       | 1 |
| <i>circLPAR1</i> | miR-637          | 1 |
| <i>circLPAR1</i> | miR-647          | 1 |
| <i>circLPAR1</i> | miR-6501-3p      | 1 |
| <i>circLPAR1</i> | miR-6505-3p      | 2 |
| <i>circLPAR1</i> | miR-670-5p       | 1 |
| <i>circLPAR1</i> | miR-6729-3p      | 1 |
| <i>circLPAR1</i> | miR-6762-3p      | 1 |
| <i>circLPAR1</i> | miR-6768-5p      | 1 |
| <i>circLPAR1</i> | miR-6769a-3p     | 1 |
| <i>circLPAR1</i> | miR-6773-3p      | 1 |
| <i>circLPAR1</i> | miR-6776-3p      | 1 |
| <i>circLPAR1</i> | miR-6796-3p      | 1 |
| <i>circLPAR1</i> | miR-6818-3p      | 1 |
| <i>circLPAR1</i> | miR-6842-3p      | 1 |
| <i>circLPAR1</i> | miR-6856-3p      | 1 |
| <i>circLPAR1</i> | miR-6857-3p      | 1 |
| <i>circLPAR1</i> | miR-6867-3p      | 1 |
| <i>circLPAR1</i> | miR-6869-5p      | 1 |
| <i>circLPAR1</i> | miR-6882-3p      | 1 |
| <i>circLPAR1</i> | miR-7-3p         | 1 |
| <i>circLPAR1</i> | miR-7106-3p      | 1 |
| <i>circLPAR1</i> | miR-7155-5p      | 1 |
| <i>circLPAR1</i> | miR-7843-3p      | 1 |
| <i>circLPAR1</i> | miR-7975         | 1 |
| <i>circLPAR1</i> | miR-8083         | 1 |
| <i>circLPAR1</i> | miR-888-3p       | 1 |

|                  |                                     |   |
|------------------|-------------------------------------|---|
| <i>circLPAR1</i> | miR-889-5p                          | 1 |
| <i>circLPAR1</i> | miR-99-3p                           | 1 |
| <i>circLPXN</i>  | miR-1179                            | 1 |
| <i>circLPXN</i>  | miR-1199-5p/6751-3p                 | 1 |
| <i>circLPXN</i>  | miR-1200                            | 1 |
| <i>circLPXN</i>  | miR-1202/3972                       | 1 |
| <i>circLPXN</i>  | miR-122-5p                          | 1 |
| <i>circLPXN</i>  | miR-1229-3p                         | 1 |
| <i>circLPXN</i>  | miR-1231                            | 1 |
| <i>circLPXN</i>  | miR-1237-3p                         | 1 |
| <i>circLPXN</i>  | miR-1245a/8079                      | 1 |
| <i>circLPXN</i>  | miR-1245b-3p                        | 1 |
| <i>circLPXN</i>  | miR-1245b-5p                        | 1 |
| <i>circLPXN</i>  | miR-1248                            | 1 |
| <i>circLPXN</i>  | miR-1250-3p                         | 1 |
| <i>circLPXN</i>  | miR-1251-5p                         | 1 |
| <i>circLPXN</i>  | miR-1256                            | 1 |
| <i>circLPXN</i>  | miR-1269                            | 1 |
| <i>circLPXN</i>  | miR-1273e                           | 1 |
| <i>circLPXN</i>  | miR-1273h-3p                        | 1 |
| <i>circLPXN</i>  | miR-1275/4665-5p                    | 1 |
| <i>circLPXN</i>  | miR-128-3p                          | 1 |
| <i>circLPXN</i>  | miR-1284                            | 1 |
| <i>circLPXN</i>  | miR-1286                            | 3 |
| <i>circLPXN</i>  | miR-1295b-5p/1912                   | 1 |
| <i>circLPXN</i>  | miR-1296-5p                         | 1 |
| <i>circLPXN</i>  | miR-1299                            | 1 |
| <i>circLPXN</i>  | miR-1301-5p/6502-5p                 | 1 |
| <i>circLPXN</i>  | miR-1304-3p                         | 1 |
| <i>circLPXN</i>  | miR-1324                            | 1 |
| <i>circLPXN</i>  | miR-1343-3p                         | 1 |
| <i>circLPXN</i>  | miR-140-3p.1                        | 1 |
| <i>circLPXN</i>  | miR-143-5p                          | 1 |
| <i>circLPXN</i>  | miR-145-5p                          | 1 |
| <i>circLPXN</i>  | miR-148-3p/152-3p                   | 1 |
| <i>circLPXN</i>  | miR-150-5p                          | 1 |
| <i>circLPXN</i>  | miR-15a-3p                          | 1 |
| <i>circLPXN</i>  | miR-17-5p/20-5p/93-5p/106-5p/519-3p | 1 |

|                 |                                     |   |
|-----------------|-------------------------------------|---|
| <i>circLPXN</i> | miR-181-3p/4420                     | 1 |
| <i>circLPXN</i> | miR-182-5p                          | 1 |
| <i>circLPXN</i> | miR-183-5p.1                        | 1 |
| <i>circLPXN</i> | miR-183-5p.2                        | 1 |
| <i>circLPXN</i> | miR-185-5p                          | 1 |
| <i>circLPXN</i> | miR-186-5p                          | 1 |
| <i>circLPXN</i> | miR-18a-3p                          | 1 |
| <i>circLPXN</i> | miR-191-3p                          | 1 |
| <i>circLPXN</i> | miR-1910-5p                         | 1 |
| <i>circLPXN</i> | miR-193a-5p                         | 1 |
| <i>circLPXN</i> | miR-196b-3p                         | 1 |
| <i>circLPXN</i> | miR-204-5p/211-5p                   | 1 |
| <i>circLPXN</i> | miR-2114-5p                         | 1 |
| <i>circLPXN</i> | miR-2116-3p                         | 1 |
| <i>circLPXN</i> | miR-212-5p                          | 1 |
| <i>circLPXN</i> | miR-216b-3p                         | 1 |
| <i>circLPXN</i> | miR-218-5p                          | 1 |
| <i>circLPXN</i> | miR-219a-2-3p                       | 1 |
| <i>circLPXN</i> | miR-219b-3p                         | 1 |
| <i>circLPXN</i> | miR-221-5p/8073                     | 1 |
| <i>circLPXN</i> | miR-2277-3p                         | 1 |
| <i>circLPXN</i> | miR-2278                            | 2 |
| <i>circLPXN</i> | miR-2392                            | 1 |
| <i>circLPXN</i> | miR-25-3p/32-5p/92-3p/363-3p/367-3p | 2 |
| <i>circLPXN</i> | miR-2681-3p                         | 1 |
| <i>circLPXN</i> | miR-298                             | 1 |
| <i>circLPXN</i> | miR-302-3p/372-3p/373-3p/520-3p     | 1 |
| <i>circLPXN</i> | miR-302c-3p.2/520-3p                | 1 |
| <i>circLPXN</i> | miR-302f                            | 1 |
| <i>circLPXN</i> | miR-3064-3p                         | 1 |
| <i>circLPXN</i> | miR-31-5p                           | 1 |
| <i>circLPXN</i> | miR-3120-3p                         | 1 |
| <i>circLPXN</i> | miR-3128                            | 2 |
| <i>circLPXN</i> | miR-3130-5p/4482-5p                 | 1 |
| <i>circLPXN</i> | miR-3133                            | 1 |
| <i>circLPXN</i> | miR-3174                            | 1 |
| <i>circLPXN</i> | miR-3182                            | 1 |
| <i>circLPXN</i> | miR-3189-3p                         | 1 |

|                 |                                              |   |
|-----------------|----------------------------------------------|---|
| <i>circLPXN</i> | miR-3189-5p                                  | 1 |
| <i>circLPXN</i> | miR-3193                                     | 1 |
| <i>circLPXN</i> | miR-3200-3p                                  | 1 |
| <i>circLPXN</i> | miR-324-3p/1913                              | 1 |
| <i>circLPXN</i> | miR-324-5p                                   | 2 |
| <i>circLPXN</i> | miR-33b-3p/515-3p/519e-3p                    | 1 |
| <i>circLPXN</i> | miR-345-5p                                   | 1 |
| <i>circLPXN</i> | miR-3660/4526                                | 1 |
| <i>circLPXN</i> | miR-3663-3p                                  | 1 |
| <i>circLPXN</i> | miR-3677-5p                                  | 1 |
| <i>circLPXN</i> | miR-3678-3p                                  | 1 |
| <i>circLPXN</i> | miR-3686                                     | 1 |
| <i>circLPXN</i> | miR-3690                                     | 2 |
| <i>circLPXN</i> | miR-371a-3p                                  | 1 |
| <i>circLPXN</i> | miR-371b-3p                                  | 1 |
| <i>circLPXN</i> | miR-378-3p                                   | 1 |
| <i>circLPXN</i> | miR-378a-5p                                  | 1 |
| <i>circLPXN</i> | miR-378j/6839-5p                             | 1 |
| <i>circLPXN</i> | miR-3908                                     | 1 |
| <i>circLPXN</i> | miR-3922-5p                                  | 1 |
| <i>circLPXN</i> | miR-3925-3p                                  | 1 |
| <i>circLPXN</i> | miR-3942-5p                                  | 1 |
| <i>circLPXN</i> | miR-3944-5p                                  | 1 |
| <i>circLPXN</i> | miR-409-3p                                   | 1 |
| <i>circLPXN</i> | miR-4254                                     | 2 |
| <i>circLPXN</i> | miR-4260                                     | 1 |
| <i>circLPXN</i> | miR-4287/4685-3p                             | 1 |
| <i>circLPXN</i> | miR-4289                                     | 1 |
| <i>circLPXN</i> | miR-4292/6791-5p                             | 1 |
| <i>circLPXN</i> | miR-4308                                     | 1 |
| <i>circLPXN</i> | miR-4317                                     | 2 |
| <i>circLPXN</i> | miR-432-3p                                   | 1 |
| <i>circLPXN</i> | miR-4324                                     | 1 |
| <i>circLPXN</i> | miR-4436b-3p/4632-5p/6735-5p/6879-5p/7843-5p | 1 |
| <i>circLPXN</i> | miR-4457                                     | 1 |
| <i>circLPXN</i> | miR-4468                                     | 2 |
| <i>circLPXN</i> | miR-4469                                     | 1 |
| <i>circLPXN</i> | miR-4481/4745-5p                             | 1 |

|                 |                             |   |
|-----------------|-----------------------------|---|
| <i>circLPXN</i> | miR-450a-2-3p               | 1 |
| <i>circLPXN</i> | miR-4512                    | 1 |
| <i>circLPXN</i> | miR-4527/6503-5p            | 1 |
| <i>circLPXN</i> | miR-4529-5p                 | 1 |
| <i>circLPXN</i> | miR-455-3p.1                | 1 |
| <i>circLPXN</i> | miR-455-3p.2                | 1 |
| <i>circLPXN</i> | miR-4638-3p                 | 1 |
| <i>circLPXN</i> | miR-4640-5p                 | 1 |
| <i>circLPXN</i> | miR-4642                    | 2 |
| <i>circLPXN</i> | miR-4659a-3p/4659b-3p       | 1 |
| <i>circLPXN</i> | miR-4661-3p                 | 1 |
| <i>circLPXN</i> | miR-4684-3p                 | 1 |
| <i>circLPXN</i> | miR-4690-5p                 | 2 |
| <i>circLPXN</i> | miR-4694-5p                 | 1 |
| <i>circLPXN</i> | miR-4696                    | 1 |
| <i>circLPXN</i> | miR-4705                    | 1 |
| <i>circLPXN</i> | miR-4715-3p                 | 1 |
| <i>circLPXN</i> | miR-4720-5p/4799-3p/5588-5p | 2 |
| <i>circLPXN</i> | miR-4722-3p/6727-3p         | 1 |
| <i>circLPXN</i> | miR-4722-5p                 | 3 |
| <i>circLPXN</i> | miR-4728-3p                 | 1 |
| <i>circLPXN</i> | miR-4734                    | 1 |
| <i>circLPXN</i> | miR-4753-5p                 | 1 |
| <i>circLPXN</i> | miR-4754                    | 1 |
| <i>circLPXN</i> | miR-4757-5p/6744-3p         | 1 |
| <i>circLPXN</i> | miR-4758-3p                 | 1 |
| <i>circLPXN</i> | miR-4761-3p                 | 1 |
| <i>circLPXN</i> | miR-4764-5p                 | 1 |
| <i>circLPXN</i> | miR-4769-3p/6817-5p         | 1 |
| <i>circLPXN</i> | miR-4776-3p                 | 1 |
| <i>circLPXN</i> | miR-4778-3p                 | 2 |
| <i>circLPXN</i> | miR-4781-3p                 | 1 |
| <i>circLPXN</i> | miR-4782-5p/5706            | 1 |
| <i>circLPXN</i> | miR-4793-5p                 | 3 |
| <i>circLPXN</i> | miR-4795-5p                 | 1 |
| <i>circLPXN</i> | miR-4796-3p                 | 1 |
| <i>circLPXN</i> | miR-492                     | 1 |
| <i>circLPXN</i> | miR-5000-3p                 | 1 |

|                 |                             |   |
|-----------------|-----------------------------|---|
| <i>circLPXN</i> | miR-5003-3p                 | 1 |
| <i>circLPXN</i> | miR-5006-5p                 | 1 |
| <i>circLPXN</i> | miR-5008-3p/6737-3p/7157-3p | 1 |
| <i>circLPXN</i> | miR-5009-5p/8058            | 1 |
| <i>circLPXN</i> | miR-500b-3p                 | 1 |
| <i>circLPXN</i> | miR-5088-3p                 | 1 |
| <i>circLPXN</i> | miR-509-3p                  | 1 |
| <i>circLPXN</i> | miR-5091                    | 1 |
| <i>circLPXN</i> | miR-512-3p                  | 1 |
| <i>circLPXN</i> | miR-513b-5p                 | 1 |
| <i>circLPXN</i> | miR-515-5p/519e-5p          | 1 |
| <i>circLPXN</i> | miR-516b-5p                 | 1 |
| <i>circLPXN</i> | miR-517-5p                  | 1 |
| <i>circLPXN</i> | miR-5186                    | 1 |
| <i>circLPXN</i> | miR-518a-5p/527             | 1 |
| <i>circLPXN</i> | miR-519-3p                  | 1 |
| <i>circLPXN</i> | miR-5190                    | 1 |
| <i>circLPXN</i> | miR-5192                    | 1 |
| <i>circLPXN</i> | miR-5196-3p                 | 3 |
| <i>circLPXN</i> | miR-5197-3p                 | 1 |
| <i>circLPXN</i> | miR-532-3p                  | 1 |
| <i>circLPXN</i> | miR-544a                    | 1 |
| <i>circLPXN</i> | miR-544b                    | 1 |
| <i>circLPXN</i> | miR-548ah-5p/3609           | 1 |
| <i>circLPXN</i> | miR-548aw                   | 1 |
| <i>circLPXN</i> | miR-550b-3p                 | 1 |
| <i>circLPXN</i> | miR-5572                    | 1 |
| <i>circLPXN</i> | miR-5580-5p                 | 1 |
| <i>circLPXN</i> | miR-5581-3p                 | 1 |
| <i>circLPXN</i> | miR-5588-3p                 | 1 |
| <i>circLPXN</i> | miR-5691                    | 2 |
| <i>circLPXN</i> | miR-5699-5p                 | 1 |
| <i>circLPXN</i> | miR-5708                    | 1 |
| <i>circLPXN</i> | miR-5739                    | 1 |
| <i>circLPXN</i> | miR-593-5p                  | 1 |
| <i>circLPXN</i> | miR-6071                    | 1 |
| <i>circLPXN</i> | miR-6081                    | 1 |
| <i>circLPXN</i> | miR-6134                    | 1 |



|                 |                             |   |
|-----------------|-----------------------------|---|
| <i>circLPXN</i> | miR-615-5p                  | 1 |
| <i>circLPXN</i> | miR-6165                    | 2 |
| <i>circLPXN</i> | miR-619-3p                  | 1 |
| <i>circLPXN</i> | miR-623                     | 1 |
| <i>circLPXN</i> | miR-624-3p                  | 1 |
| <i>circLPXN</i> | miR-628-5p                  | 1 |
| <i>circLPXN</i> | miR-629-3p                  | 1 |
| <i>circLPXN</i> | miR-631/3661                | 1 |
| <i>circLPXN</i> | miR-632/4288                | 1 |
| <i>circLPXN</i> | miR-635/6774-5p             | 1 |
| <i>circLPXN</i> | miR-636                     | 1 |
| <i>circLPXN</i> | miR-640                     | 1 |
| <i>circLPXN</i> | miR-6499-3p                 | 1 |
| <i>circLPXN</i> | miR-6501-3p                 | 1 |
| <i>circLPXN</i> | miR-6508-3p                 | 1 |
| <i>circLPXN</i> | miR-6510-5p                 | 2 |
| <i>circLPXN</i> | miR-6511-5p                 | 1 |
| <i>circLPXN</i> | miR-6516-5p                 | 2 |
| <i>circLPXN</i> | miR-653-3p                  | 1 |
| <i>circLPXN</i> | miR-658                     | 2 |
| <i>circLPXN</i> | miR-659-5p                  | 1 |
| <i>circLPXN</i> | miR-670-5p                  | 1 |
| <i>circLPXN</i> | miR-6719-3p                 | 1 |
| <i>circLPXN</i> | miR-6730-3p                 | 1 |
| <i>circLPXN</i> | miR-6738-3p                 | 1 |
| <i>circLPXN</i> | miR-6740-5p                 | 1 |
| <i>circLPXN</i> | miR-6747-3p                 | 1 |
| <i>circLPXN</i> | miR-6751-5p/6803-5p         | 1 |
| <i>circLPXN</i> | miR-6752-5p/6842-5p/7110-5p | 1 |
| <i>circLPXN</i> | miR-6753-3p/7107-3p         | 1 |
| <i>circLPXN</i> | miR-6758-3p                 | 1 |
| <i>circLPXN</i> | miR-6759-3p                 | 1 |
| <i>circLPXN</i> | miR-6772-3p                 | 1 |
| <i>circLPXN</i> | miR-6778-3p                 | 1 |
| <i>circLPXN</i> | miR-6791-3p/6829-3p         | 1 |
| <i>circLPXN</i> | miR-6793-3p                 | 1 |
| <i>circLPXN</i> | miR-6809-5p                 | 1 |
| <i>circLPXN</i> | miR-6813-3p                 | 1 |

|                   |                                       |   |
|-------------------|---------------------------------------|---|
| <i>circLPXN</i>   | miR-6814-5p                           | 1 |
| <i>circLPXN</i>   | miR-6828-3p                           | 1 |
| <i>circLPXN</i>   | miR-6835-5p                           | 1 |
| <i>circLPXN</i>   | miR-6844                              | 1 |
| <i>circLPXN</i>   | miR-6850-5p                           | 1 |
| <i>circLPXN</i>   | miR-6861-3p                           | 1 |
| <i>circLPXN</i>   | miR-6868-5p                           | 2 |
| <i>circLPXN</i>   | miR-6872-3p                           | 1 |
| <i>circLPXN</i>   | miR-6874-5p                           | 1 |
| <i>circLPXN</i>   | miR-6875-3p                           | 1 |
| <i>circLPXN</i>   | miR-6878-3p                           | 1 |
| <i>circLPXN</i>   | miR-6889-3p                           | 1 |
| <i>circLPXN</i>   | miR-6890-3p                           | 1 |
| <i>circLPXN</i>   | miR-6895-5p                           | 1 |
| <i>circLPXN</i>   | miR-7106-3p                           | 1 |
| <i>circLPXN</i>   | miR-7109-5p                           | 1 |
| <i>circLPXN</i>   | miR-7113-3p                           | 1 |
| <i>circLPXN</i>   | miR-7151-5p                           | 1 |
| <i>circLPXN</i>   | miR-7160-3p                           | 1 |
| <i>circLPXN</i>   | miR-744-3p                            | 1 |
| <i>circLPXN</i>   | miR-766-3p                            | 1 |
| <i>circLPXN</i>   | miR-767-3p                            | 2 |
| <i>circLPXN</i>   | miR-7704                              | 1 |
| <i>circLPXN</i>   | miR-7846-3p                           | 1 |
| <i>circLPXN</i>   | miR-7851-3p                           | 1 |
| <i>circLPXN</i>   | miR-7854-3p                           | 1 |
| <i>circLPXN</i>   | miR-8055                              | 1 |
| <i>circLPXN</i>   | miR-8057                              | 1 |
| <i>circLPXN</i>   | miR-8062                              | 1 |
| <i>circLPXN</i>   | miR-873-5p.1                          | 1 |
| <i>circLPXN</i>   | miR-873-5p.2                          | 3 |
| <i>circLPXN</i>   | miR-888-5p                            | 1 |
| <i>circLPXN</i>   | miR-96-3p                             | 1 |
| <i>circLPXN</i>   | miR-96-5p/1271-5p                     | 1 |
| <i>circLRRC49</i> | let-7-5p/98-5p                        | 1 |
| <i>circLRRC49</i> | let-7a-2-3p/let-7g-3p                 | 1 |
| <i>circLRRC49</i> | let-7a-3p/let-7b-3p/let-7f-1-3p/98-3p | 1 |
| <i>circLRRC49</i> | let-7c-3p                             | 1 |

|                   |                     |   |
|-------------------|---------------------|---|
| <i>circLRRC49</i> | let-7f-2-3p/1185-3p | 1 |
| <i>circLRRC49</i> | miR-1-3p/206        | 1 |
| <i>circLRRC49</i> | miR-1-5p            | 2 |
| <i>circLRRC49</i> | miR-10-5p           | 1 |
| <i>circLRRC49</i> | miR-100-3p          | 4 |
| <i>circLRRC49</i> | miR-101-5p          | 3 |
| <i>circLRRC49</i> | miR-105-5p          | 3 |
| <i>circLRRC49</i> | miR-1178-3p         | 1 |
| <i>circLRRC49</i> | miR-1184            | 4 |
| <i>circLRRC49</i> | miR-1185-5p         | 1 |
| <i>circLRRC49</i> | miR-1197            | 5 |
| <i>circLRRC49</i> | miR-1205            | 4 |
| <i>circLRRC49</i> | miR-1207-5p/4763-3p | 8 |
| <i>circLRRC49</i> | miR-1224-3p         | 1 |
| <i>circLRRC49</i> | miR-1224-5p         | 4 |
| <i>circLRRC49</i> | miR-1226-5p         | 1 |
| <i>circLRRC49</i> | miR-1229-3p         | 2 |
| <i>circLRRC49</i> | miR-124-3p.1        | 4 |
| <i>circLRRC49</i> | miR-1243            | 5 |
| <i>circLRRC49</i> | miR-1245a/8079      | 2 |
| <i>circLRRC49</i> | miR-1245b-3p        | 5 |
| <i>circLRRC49</i> | miR-1249-5p/6797-5p | 4 |
| <i>circLRRC49</i> | miR-1250-3p         | 3 |
| <i>circLRRC49</i> | miR-1251-5p         | 2 |
| <i>circLRRC49</i> | miR-1252-3p         | 4 |
| <i>circLRRC49</i> | miR-1252-5p         | 3 |
| <i>circLRRC49</i> | miR-1253            | 2 |
| <i>circLRRC49</i> | miR-1254/3116       | 1 |
| <i>circLRRC49</i> | miR-1255b-2-3p      | 4 |
| <i>circLRRC49</i> | miR-1257            | 2 |
| <i>circLRRC49</i> | miR-125a-3p         | 1 |
| <i>circLRRC49</i> | miR-1260a/1260b     | 2 |
| <i>circLRRC49</i> | miR-1263            | 1 |
| <i>circLRRC49</i> | miR-1264            | 1 |
| <i>circLRRC49</i> | miR-1265            | 1 |
| <i>circLRRC49</i> | miR-1266-5p/4518    | 1 |
| <i>circLRRC49</i> | miR-1270            | 1 |
| <i>circLRRC49</i> | miR-1273f           | 5 |

|                   |                                    |   |
|-------------------|------------------------------------|---|
| <i>circLRRC49</i> | miR-1273g-3p                       | 6 |
| <i>circLRRC49</i> | miR-1273h-3p                       | 5 |
| <i>circLRRC49</i> | miR-1276                           | 5 |
| <i>circLRRC49</i> | miR-1277-5p                        | 4 |
| <i>circLRRC49</i> | miR-1279                           | 3 |
| <i>circLRRC49</i> | miR-1285-5p                        | 1 |
| <i>circLRRC49</i> | miR-1286                           | 4 |
| <i>circLRRC49</i> | miR-1289                           | 1 |
| <i>circLRRC49</i> | miR-129-5p                         | 2 |
| <i>circLRRC49</i> | miR-1294                           | 2 |
| <i>circLRRC49</i> | miR-1298-3p                        | 2 |
| <i>circLRRC49</i> | miR-1299                           | 3 |
| <i>circLRRC49</i> | miR-1303                           | 1 |
| <i>circLRRC49</i> | miR-1305                           | 4 |
| <i>circLRRC49</i> | miR-130b-5p                        | 3 |
| <i>circLRRC49</i> | miR-1323                           | 5 |
| <i>circLRRC49</i> | miR-134-5p                         | 1 |
| <i>circLRRC49</i> | miR-1343-3p                        | 2 |
| <i>circLRRC49</i> | miR-138-1-3p                       | 2 |
| <i>circLRRC49</i> | miR-138-2-3p                       | 5 |
| <i>circLRRC49</i> | miR-139-3p                         | 2 |
| <i>circLRRC49</i> | miR-141-3p/200-3p                  | 4 |
| <i>circLRRC49</i> | miR-141-5p                         | 4 |
| <i>circLRRC49</i> | miR-143-3p                         | 5 |
| <i>circLRRC49</i> | miR-145-3p                         | 2 |
| <i>circLRRC49</i> | miR-1468-3p                        | 4 |
| <i>circLRRC49</i> | miR-146a-3p                        | 2 |
| <i>circLRRC49</i> | miR-148-3p/152-3p                  | 1 |
| <i>circLRRC49</i> | miR-148a-5p                        | 7 |
| <i>circLRRC49</i> | miR-149-3p/4728-5p/6785-5p/6883-5p | 4 |
| <i>circLRRC49</i> | miR-150-3p                         | 1 |
| <i>circLRRC49</i> | miR-152-5p                         | 1 |
| <i>circLRRC49</i> | miR-153-5p                         | 5 |
| <i>circLRRC49</i> | miR-1537-5p                        | 1 |
| <i>circLRRC49</i> | miR-1538/4745-3p                   | 1 |
| <i>circLRRC49</i> | miR-154-3p/487-3p                  | 3 |
| <i>circLRRC49</i> | miR-154-5p                         | 1 |
| <i>circLRRC49</i> | miR-1587/3620-5p                   | 1 |

|                   |                                     |   |
|-------------------|-------------------------------------|---|
| <i>circLRRC49</i> | miR-15b-3p                          | 2 |
| <i>circLRRC49</i> | miR-17-3p                           | 4 |
| <i>circLRRC49</i> | miR-17-5p/20-5p/93-5p/106-5p/519-3p | 2 |
| <i>circLRRC49</i> | miR-18-5p                           | 4 |
| <i>circLRRC49</i> | miR-181-3p/4420                     | 5 |
| <i>circLRRC49</i> | miR-1825                            | 2 |
| <i>circLRRC49</i> | miR-1827                            | 4 |
| <i>circLRRC49</i> | miR-185-5p                          | 3 |
| <i>circLRRC49</i> | miR-186-3p                          | 1 |
| <i>circLRRC49</i> | miR-186-5p                          | 5 |
| <i>circLRRC49</i> | miR-187-5p                          | 2 |
| <i>circLRRC49</i> | miR-188-3p                          | 2 |
| <i>circLRRC49</i> | miR-18a-3p                          | 1 |
| <i>circLRRC49</i> | miR-19-5p                           | 1 |
| <i>circLRRC49</i> | miR-1909-3p/6722-3p                 | 4 |
| <i>circLRRC49</i> | miR-190a-3p                         | 3 |
| <i>circLRRC49</i> | miR-1910-3p/6511a-5p                | 8 |
| <i>circLRRC49</i> | miR-1915-3p/6764-5p                 | 1 |
| <i>circLRRC49</i> | miR-192-3p                          | 1 |
| <i>circLRRC49</i> | miR-192-5p/215-5p                   | 2 |
| <i>circLRRC49</i> | miR-193-3p                          | 1 |
| <i>circLRRC49</i> | miR-193b-5p                         | 4 |
| <i>circLRRC49</i> | miR-194-3p                          | 1 |
| <i>circLRRC49</i> | miR-196a-3p                         | 1 |
| <i>circLRRC49</i> | miR-196b-3p                         | 3 |
| <i>circLRRC49</i> | miR-199-3p                          | 1 |
| <i>circLRRC49</i> | miR-199-5p                          | 2 |
| <i>circLRRC49</i> | miR-202-5p                          | 1 |
| <i>circLRRC49</i> | miR-203b-5p/6718-5p                 | 1 |
| <i>circLRRC49</i> | miR-2052                            | 1 |
| <i>circLRRC49</i> | miR-2053                            | 8 |
| <i>circLRRC49</i> | miR-2054                            | 1 |
| <i>circLRRC49</i> | miR-208-5p                          | 5 |
| <i>circLRRC49</i> | miR-20b-3p                          | 4 |
| <i>circLRRC49</i> | miR-21-3p/3591-3p                   | 1 |
| <i>circLRRC49</i> | miR-210-5p                          | 1 |
| <i>circLRRC49</i> | miR-211-3p                          | 8 |
| <i>circLRRC49</i> | miR-2113                            | 1 |

|                   |                                              |    |
|-------------------|----------------------------------------------|----|
| <i>circLRRC49</i> | miR-2115-3p                                  | 3  |
| <i>circLRRC49</i> | miR-217                                      | 8  |
| <i>circLRRC49</i> | miR-219-5p                                   | 3  |
| <i>circLRRC49</i> | miR-22-3p                                    | 7  |
| <i>circLRRC49</i> | miR-221-3p/222-3p                            | 6  |
| <i>circLRRC49</i> | miR-221-5p/8073                              | 3  |
| <i>circLRRC49</i> | miR-222-5p                                   | 4  |
| <i>circLRRC49</i> | miR-224-5p                                   | 3  |
| <i>circLRRC49</i> | miR-2276-3p                                  | 4  |
| <i>circLRRC49</i> | miR-2276-5p                                  | 1  |
| <i>circLRRC49</i> | miR-2277-3p                                  | 3  |
| <i>circLRRC49</i> | miR-2278                                     | 1  |
| <i>circLRRC49</i> | miR-2355-5p                                  | 5  |
| <i>circLRRC49</i> | miR-24-3p                                    | 1  |
| <i>circLRRC49</i> | miR-24-5p                                    | 1  |
| <i>circLRRC49</i> | miR-26-5p                                    | 1  |
| <i>circLRRC49</i> | miR-2681-3p                                  | 2  |
| <i>circLRRC49</i> | miR-2681-5p                                  | 2  |
| <i>circLRRC49</i> | miR-2682-3p/6781-3p                          | 1  |
| <i>circLRRC49</i> | miR-26b-3p                                   | 1  |
| <i>circLRRC49</i> | miR-27-3p                                    | 1  |
| <i>circLRRC49</i> | miR-28-3p                                    | 2  |
| <i>circLRRC49</i> | miR-296-3p                                   | 4  |
| <i>circLRRC49</i> | miR-298                                      | 6  |
| <i>circLRRC49</i> | miR-29a-5p                                   | 10 |
| <i>circLRRC49</i> | miR-30-3p                                    | 4  |
| <i>circLRRC49</i> | miR-30-5p                                    | 2  |
| <i>circLRRC49</i> | miR-301a-5p/301b-5p                          | 1  |
| <i>circLRRC49</i> | miR-302a-5p                                  | 2  |
| <i>circLRRC49</i> | miR-302b-5p/302d-5p                          | 1  |
| <i>circLRRC49</i> | miR-302c-5p                                  | 2  |
| <i>circLRRC49</i> | miR-302f                                     | 1  |
| <i>circLRRC49</i> | miR-3065-5p                                  | 3  |
| <i>circLRRC49</i> | miR-3074-5p                                  | 2  |
| <i>circLRRC49</i> | miR-30b-3p/1273h-5p/3689-3p/6779-5p/6780a-5p | 4  |
| <i>circLRRC49</i> | miR-30c-3p/6788-5p                           | 4  |
| <i>circLRRC49</i> | miR-31-5p                                    | 5  |
| <i>circLRRC49</i> | miR-3117-3p                                  | 4  |

|                   |                          |   |
|-------------------|--------------------------|---|
| <i>circLRRC49</i> | miR-3120-3p              | 3 |
| <i>circLRRC49</i> | miR-3121-3p              | 6 |
| <i>circLRRC49</i> | miR-3121-5p              | 1 |
| <i>circLRRC49</i> | miR-3123                 | 1 |
| <i>circLRRC49</i> | miR-3125/3916/6859-5p    | 2 |
| <i>circLRRC49</i> | miR-3126-3p              | 2 |
| <i>circLRRC49</i> | miR-3128                 | 3 |
| <i>circLRRC49</i> | miR-3130-3p              | 5 |
| <i>circLRRC49</i> | miR-3133                 | 5 |
| <i>circLRRC49</i> | miR-3134                 | 1 |
| <i>circLRRC49</i> | miR-3137                 | 4 |
| <i>circLRRC49</i> | miR-3140-3p              | 7 |
| <i>circLRRC49</i> | miR-3140-5p              | 1 |
| <i>circLRRC49</i> | miR-3143                 | 1 |
| <i>circLRRC49</i> | miR-3145-3p              | 3 |
| <i>circLRRC49</i> | miR-3146                 | 1 |
| <i>circLRRC49</i> | miR-3149                 | 3 |
| <i>circLRRC49</i> | miR-3150a-5p/3150b-5p    | 1 |
| <i>circLRRC49</i> | miR-3150b-3p             | 4 |
| <i>circLRRC49</i> | miR-3152-5p              | 1 |
| <i>circLRRC49</i> | miR-3153/6733-5p/6739-5p | 1 |
| <i>circLRRC49</i> | miR-3154                 | 4 |
| <i>circLRRC49</i> | miR-3156-3p              | 2 |
| <i>circLRRC49</i> | miR-3156-5p              | 4 |
| <i>circLRRC49</i> | miR-3157-3p              | 1 |
| <i>circLRRC49</i> | miR-3158-5p              | 4 |
| <i>circLRRC49</i> | miR-3159                 | 1 |
| <i>circLRRC49</i> | miR-3162-3p              | 1 |
| <i>circLRRC49</i> | miR-3163                 | 4 |
| <i>circLRRC49</i> | miR-3164                 | 1 |
| <i>circLRRC49</i> | miR-3169                 | 1 |
| <i>circLRRC49</i> | miR-3170/6855-5p         | 1 |
| <i>circLRRC49</i> | miR-3174                 | 6 |
| <i>circLRRC49</i> | miR-3176/3922-3p         | 2 |
| <i>circLRRC49</i> | miR-3179                 | 2 |
| <i>circLRRC49</i> | miR-3182                 | 3 |
| <i>circLRRC49</i> | miR-3184-3p              | 1 |
| <i>circLRRC49</i> | miR-3185                 | 7 |

|                   |                           |   |
|-------------------|---------------------------|---|
| <i>circLRRC49</i> | miR-3187-3p               | 1 |
| <i>circLRRC49</i> | miR-3190-3p               | 1 |
| <i>circLRRC49</i> | miR-3190-5p               | 2 |
| <i>circLRRC49</i> | miR-3191-5p               | 4 |
| <i>circLRRC49</i> | miR-3192-3p               | 1 |
| <i>circLRRC49</i> | miR-3194-3p               | 1 |
| <i>circLRRC49</i> | miR-32-3p                 | 6 |
| <i>circLRRC49</i> | miR-320                   | 5 |
| <i>circLRRC49</i> | miR-3200-5p               | 1 |
| <i>circLRRC49</i> | miR-320e                  | 9 |
| <i>circLRRC49</i> | miR-323-3p                | 1 |
| <i>circLRRC49</i> | miR-323a-5p               | 4 |
| <i>circLRRC49</i> | miR-324-3p/1913           | 1 |
| <i>circLRRC49</i> | miR-326                   | 4 |
| <i>circLRRC49</i> | miR-328-3p                | 1 |
| <i>circLRRC49</i> | miR-329-5p                | 1 |
| <i>circLRRC49</i> | miR-330-3p                | 1 |
| <i>circLRRC49</i> | miR-330-3p.2              | 5 |
| <i>circLRRC49</i> | miR-331-5p                | 1 |
| <i>circLRRC49</i> | miR-335-3p                | 5 |
| <i>circLRRC49</i> | miR-335-5p                | 1 |
| <i>circLRRC49</i> | miR-337-3p                | 1 |
| <i>circLRRC49</i> | miR-33a-3p                | 1 |
| <i>circLRRC49</i> | miR-33b-3p/515-3p/519e-3p | 1 |
| <i>circLRRC49</i> | miR-340-5p                | 8 |
| <i>circLRRC49</i> | miR-342-3p                | 3 |
| <i>circLRRC49</i> | miR-342-5p/4664-5p        | 1 |
| <i>circLRRC49</i> | miR-345-3p                | 1 |
| <i>circLRRC49</i> | miR-346                   | 1 |
| <i>circLRRC49</i> | miR-34b-3p                | 5 |
| <i>circLRRC49</i> | miR-34b-5p/449c-5p        | 8 |
| <i>circLRRC49</i> | miR-34c-3p                | 5 |
| <i>circLRRC49</i> | miR-3591-5p               | 4 |
| <i>circLRRC49</i> | miR-3605-5p               | 1 |
| <i>circLRRC49</i> | miR-3606-5p               | 3 |
| <i>circLRRC49</i> | miR-361-3p                | 1 |
| <i>circLRRC49</i> | miR-3611                  | 2 |
| <i>circLRRC49</i> | miR-3612                  | 4 |



|                   |               |   |
|-------------------|---------------|---|
| <i>circLRRC49</i> | miR-3613-3p   | 1 |
| <i>circLRRC49</i> | miR-3614-5p   | 2 |
| <i>circLRRC49</i> | miR-3620-3p   | 1 |
| <i>circLRRC49</i> | miR-3646      | 4 |
| <i>circLRRC49</i> | miR-3650      | 1 |
| <i>circLRRC49</i> | miR-3654      | 5 |
| <i>circLRRC49</i> | miR-3658      | 2 |
| <i>circLRRC49</i> | miR-3660/4526 | 1 |
| <i>circLRRC49</i> | miR-3662      | 1 |
| <i>circLRRC49</i> | miR-3663-5p   | 1 |
| <i>circLRRC49</i> | miR-3664-3p   | 1 |
| <i>circLRRC49</i> | miR-3668      | 1 |
| <i>circLRRC49</i> | miR-3670      | 5 |
| <i>circLRRC49</i> | miR-3671      | 1 |
| <i>circLRRC49</i> | miR-3675-3p   | 4 |
| <i>circLRRC49</i> | miR-3677-5p   | 1 |
| <i>circLRRC49</i> | miR-3678-3p   | 5 |
| <i>circLRRC49</i> | miR-3679-3p   | 5 |
| <i>circLRRC49</i> | miR-3680-3p   | 1 |
| <i>circLRRC49</i> | miR-3680-5p   | 3 |
| <i>circLRRC49</i> | miR-3682-3p   | 4 |
| <i>circLRRC49</i> | miR-3685      | 1 |
| <i>circLRRC49</i> | miR-3686      | 3 |
| <i>circLRRC49</i> | miR-3688-3p   | 4 |
| <i>circLRRC49</i> | miR-3688-5p   | 1 |
| <i>circLRRC49</i> | miR-3690      | 1 |
| <i>circLRRC49</i> | miR-3691-3p   | 1 |
| <i>circLRRC49</i> | miR-370-3p    | 1 |
| <i>circLRRC49</i> | miR-3713      | 3 |
| <i>circLRRC49</i> | miR-3714      | 4 |
| <i>circLRRC49</i> | miR-371a-3p   | 1 |
| <i>circLRRC49</i> | miR-371b-3p   | 1 |
| <i>circLRRC49</i> | miR-374-5p    | 4 |
| <i>circLRRC49</i> | miR-374a-3p   | 4 |
| <i>circLRRC49</i> | miR-374b-3p   | 1 |
| <i>circLRRC49</i> | miR-376a-2-5p | 6 |
| <i>circLRRC49</i> | miR-376a-5p   | 6 |
| <i>circLRRC49</i> | miR-377-3p    | 3 |

|                   |                     |   |
|-------------------|---------------------|---|
| <i>circLRRC49</i> | miR-377-5p/6086     | 1 |
| <i>circLRRC49</i> | miR-378-3p          | 5 |
| <i>circLRRC49</i> | miR-378g            | 1 |
| <i>circLRRC49</i> | miR-380-3p          | 1 |
| <i>circLRRC49</i> | miR-382-3p          | 3 |
| <i>circLRRC49</i> | miR-383-5p.2        | 1 |
| <i>circLRRC49</i> | miR-384             | 1 |
| <i>circLRRC49</i> | miR-3910            | 4 |
| <i>circLRRC49</i> | miR-3911            | 1 |
| <i>circLRRC49</i> | miR-3913-3p         | 4 |
| <i>circLRRC49</i> | miR-3914            | 1 |
| <i>circLRRC49</i> | miR-3915            | 4 |
| <i>circLRRC49</i> | miR-3918            | 4 |
| <i>circLRRC49</i> | miR-3920            | 6 |
| <i>circLRRC49</i> | miR-3921/4653-5p    | 1 |
| <i>circLRRC49</i> | miR-3922-5p         | 4 |
| <i>circLRRC49</i> | miR-3924            | 1 |
| <i>circLRRC49</i> | miR-3925-3p         | 3 |
| <i>circLRRC49</i> | miR-3925-5p         | 1 |
| <i>circLRRC49</i> | miR-3928-3p         | 1 |
| <i>circLRRC49</i> | miR-3929/4419b/4478 | 1 |
| <i>circLRRC49</i> | miR-3934-3p         | 1 |
| <i>circLRRC49</i> | miR-3934-5p         | 1 |
| <i>circLRRC49</i> | miR-3935            | 4 |
| <i>circLRRC49</i> | miR-3938            | 1 |
| <i>circLRRC49</i> | miR-3942-3p         | 1 |
| <i>circLRRC49</i> | miR-3978            | 2 |
| <i>circLRRC49</i> | miR-409-3p          | 4 |
| <i>circLRRC49</i> | miR-410-3p          | 6 |
| <i>circLRRC49</i> | miR-411-5p.1        | 1 |
| <i>circLRRC49</i> | miR-421             | 5 |
| <i>circLRRC49</i> | miR-4251            | 5 |
| <i>circLRRC49</i> | miR-4254            | 1 |
| <i>circLRRC49</i> | miR-4256            | 2 |
| <i>circLRRC49</i> | miR-4257            | 1 |
| <i>circLRRC49</i> | miR-4260            | 1 |
| <i>circLRRC49</i> | miR-4263            | 2 |
| <i>circLRRC49</i> | miR-4266            | 1 |

|                   |                                              |   |
|-------------------|----------------------------------------------|---|
| <i>circLRRC49</i> | miR-4269/6715b-5p                            | 1 |
| <i>circLRRC49</i> | miR-4270/4441/6754-5p                        | 1 |
| <i>circLRRC49</i> | miR-4273/7156-5p                             | 1 |
| <i>circLRRC49</i> | miR-4274                                     | 1 |
| <i>circLRRC49</i> | miR-4275                                     | 1 |
| <i>circLRRC49</i> | miR-4279                                     | 5 |
| <i>circLRRC49</i> | miR-4281                                     | 1 |
| <i>circLRRC49</i> | miR-4282                                     | 3 |
| <i>circLRRC49</i> | miR-4284                                     | 1 |
| <i>circLRRC49</i> | miR-4289                                     | 1 |
| <i>circLRRC49</i> | miR-4290                                     | 1 |
| <i>circLRRC49</i> | miR-4292/6791-5p                             | 1 |
| <i>circLRRC49</i> | miR-4294                                     | 1 |
| <i>circLRRC49</i> | miR-4301                                     | 2 |
| <i>circLRRC49</i> | miR-4307                                     | 2 |
| <i>circLRRC49</i> | miR-4308                                     | 1 |
| <i>circLRRC49</i> | miR-4311                                     | 5 |
| <i>circLRRC49</i> | miR-4313                                     | 1 |
| <i>circLRRC49</i> | miR-4316                                     | 2 |
| <i>circLRRC49</i> | miR-4317                                     | 5 |
| <i>circLRRC49</i> | miR-4318                                     | 1 |
| <i>circLRRC49</i> | miR-4320                                     | 1 |
| <i>circLRRC49</i> | miR-4325                                     | 1 |
| <i>circLRRC49</i> | miR-4326                                     | 2 |
| <i>circLRRC49</i> | miR-4329                                     | 5 |
| <i>circLRRC49</i> | miR-4330                                     | 1 |
| <i>circLRRC49</i> | miR-4422                                     | 5 |
| <i>circLRRC49</i> | miR-4424                                     | 3 |
| <i>circLRRC49</i> | miR-4426/4647/4662b                          | 2 |
| <i>circLRRC49</i> | miR-4427                                     | 1 |
| <i>circLRRC49</i> | miR-4433a-3p                                 | 1 |
| <i>circLRRC49</i> | miR-4433a-5p                                 | 2 |
| <i>circLRRC49</i> | miR-4433b-5p                                 | 1 |
| <i>circLRRC49</i> | miR-4434/4516/5703                           | 1 |
| <i>circLRRC49</i> | miR-4435                                     | 1 |
| <i>circLRRC49</i> | miR-4436b-3p/4632-5p/6735-5p/6879-5p/7843-5p | 7 |
| <i>circLRRC49</i> | miR-4436b-5p                                 | 9 |
| <i>circLRRC49</i> | miR-4437                                     | 1 |

|                   |               |   |
|-------------------|---------------|---|
| <i>circLRRC49</i> | miR-4443      | 4 |
| <i>circLRRC49</i> | miR-4444      | 1 |
| <i>circLRRC49</i> | miR-4445-5p   | 3 |
| <i>circLRRC49</i> | miR-4446-5p   | 2 |
| <i>circLRRC49</i> | miR-4455      | 1 |
| <i>circLRRC49</i> | miR-4459      | 1 |
| <i>circLRRC49</i> | miR-4460      | 1 |
| <i>circLRRC49</i> | miR-4462      | 1 |
| <i>circLRRC49</i> | miR-4464/4748 | 1 |
| <i>circLRRC49</i> | miR-4468      | 1 |
| <i>circLRRC49</i> | miR-4470      | 5 |
| <i>circLRRC49</i> | miR-4474-3p   | 1 |
| <i>circLRRC49</i> | miR-4475      | 2 |
| <i>circLRRC49</i> | miR-4477a     | 4 |
| <i>circLRRC49</i> | miR-4482-3p   | 5 |
| <i>circLRRC49</i> | miR-4484      | 1 |
| <i>circLRRC49</i> | miR-4486      | 1 |
| <i>circLRRC49</i> | miR-4493      | 4 |
| <i>circLRRC49</i> | miR-449c-3p   | 1 |
| <i>circLRRC49</i> | miR-4501      | 2 |
| <i>circLRRC49</i> | miR-4503      | 3 |
| <i>circLRRC49</i> | miR-4506      | 4 |
| <i>circLRRC49</i> | miR-4509      | 1 |
| <i>circLRRC49</i> | miR-450a-2-3p | 1 |
| <i>circLRRC49</i> | miR-450b-5p   | 1 |
| <i>circLRRC49</i> | miR-4514/4692 | 1 |
| <i>circLRRC49</i> | miR-4517      | 1 |
| <i>circLRRC49</i> | miR-4519      | 1 |
| <i>circLRRC49</i> | miR-4520-3p   | 5 |
| <i>circLRRC49</i> | miR-4521      | 1 |
| <i>circLRRC49</i> | miR-4524-5p   | 1 |
| <i>circLRRC49</i> | miR-4524a-3p  | 1 |
| <i>circLRRC49</i> | miR-4524b-3p  | 4 |
| <i>circLRRC49</i> | miR-4531      | 1 |
| <i>circLRRC49</i> | miR-4534/8082 | 1 |
| <i>circLRRC49</i> | miR-4536-5p   | 1 |
| <i>circLRRC49</i> | miR-4635      | 1 |
| <i>circLRRC49</i> | miR-4638-3p   | 5 |

|                   |                       |   |
|-------------------|-----------------------|---|
| <i>circLRRC49</i> | miR-4639-3p           | 5 |
| <i>circLRRC49</i> | miR-4639-5p           | 4 |
| <i>circLRRC49</i> | miR-4641              | 2 |
| <i>circLRRC49</i> | miR-4645-3p           | 8 |
| <i>circLRRC49</i> | miR-4649-3p           | 4 |
| <i>circLRRC49</i> | miR-4652-3p           | 5 |
| <i>circLRRC49</i> | miR-4659a-3p/4659b-3p | 8 |
| <i>circLRRC49</i> | miR-4661-3p           | 1 |
| <i>circLRRC49</i> | miR-4662-5p           | 1 |
| <i>circLRRC49</i> | miR-4663              | 4 |
| <i>circLRRC49</i> | miR-4666a-5p          | 1 |
| <i>circLRRC49</i> | miR-4666b             | 1 |
| <i>circLRRC49</i> | miR-4668-3p           | 1 |
| <i>circLRRC49</i> | miR-4668-5p           | 1 |
| <i>circLRRC49</i> | miR-4674              | 1 |
| <i>circLRRC49</i> | miR-4677-3p           | 2 |
| <i>circLRRC49</i> | miR-4677-5p           | 1 |
| <i>circLRRC49</i> | miR-4678              | 1 |
| <i>circLRRC49</i> | miR-4679              | 2 |
| <i>circLRRC49</i> | miR-4680-3p           | 1 |
| <i>circLRRC49</i> | miR-4683              | 2 |
| <i>circLRRC49</i> | miR-4689/6858-5p      | 4 |
| <i>circLRRC49</i> | miR-4690-3p/5685      | 2 |
| <i>circLRRC49</i> | miR-4690-5p           | 2 |
| <i>circLRRC49</i> | miR-4691-5p/6792-3p   | 4 |
| <i>circLRRC49</i> | miR-4693-5p           | 1 |
| <i>circLRRC49</i> | miR-4694-3p           | 5 |
| <i>circLRRC49</i> | miR-4696              | 3 |
| <i>circLRRC49</i> | miR-4698              | 1 |
| <i>circLRRC49</i> | miR-4699-3p           | 3 |
| <i>circLRRC49</i> | miR-4699-5p           | 4 |
| <i>circLRRC49</i> | miR-4700-3p           | 1 |
| <i>circLRRC49</i> | miR-4707-3p           | 1 |
| <i>circLRRC49</i> | miR-4708-3p           | 8 |
| <i>circLRRC49</i> | miR-4708-5p           | 5 |
| <i>circLRRC49</i> | miR-4709-3p           | 2 |
| <i>circLRRC49</i> | miR-4709-5p           | 1 |
| <i>circLRRC49</i> | miR-4711-5p           | 3 |

|                   |                             |   |
|-------------------|-----------------------------|---|
| <i>circLRRC49</i> | miR-4718                    | 1 |
| <i>circLRRC49</i> | miR-4719                    | 3 |
| <i>circLRRC49</i> | miR-4720-5p/4799-3p/5588-5p | 3 |
| <i>circLRRC49</i> | miR-4722-3p/6727-3p         | 1 |
| <i>circLRRC49</i> | miR-4722-5p                 | 4 |
| <i>circLRRC49</i> | miR-4724-3p                 | 1 |
| <i>circLRRC49</i> | miR-4724-5p                 | 1 |
| <i>circLRRC49</i> | miR-4726-3p                 | 1 |
| <i>circLRRC49</i> | miR-4727-3p                 | 1 |
| <i>circLRRC49</i> | miR-4727-5p                 | 1 |
| <i>circLRRC49</i> | miR-4728-3p                 | 1 |
| <i>circLRRC49</i> | miR-4729                    | 1 |
| <i>circLRRC49</i> | miR-4731-3p/4801            | 3 |
| <i>circLRRC49</i> | miR-4731-5p                 | 1 |
| <i>circLRRC49</i> | miR-4733-5p                 | 1 |
| <i>circLRRC49</i> | miR-4735-5p                 | 1 |
| <i>circLRRC49</i> | miR-4736                    | 8 |
| <i>circLRRC49</i> | miR-4739                    | 2 |
| <i>circLRRC49</i> | miR-4742-5p                 | 1 |
| <i>circLRRC49</i> | miR-4743-3p                 | 5 |
| <i>circLRRC49</i> | miR-4744                    | 1 |
| <i>circLRRC49</i> | miR-4747-3p                 | 1 |
| <i>circLRRC49</i> | miR-4749-3p                 | 1 |
| <i>circLRRC49</i> | miR-4750-3p                 | 1 |
| <i>circLRRC49</i> | miR-4751                    | 1 |
| <i>circLRRC49</i> | miR-4752                    | 1 |
| <i>circLRRC49</i> | miR-4753-5p                 | 1 |
| <i>circLRRC49</i> | miR-4759                    | 1 |
| <i>circLRRC49</i> | miR-4760-3p                 | 1 |
| <i>circLRRC49</i> | miR-4760-5p/8061            | 2 |
| <i>circLRRC49</i> | miR-4761-3p                 | 5 |
| <i>circLRRC49</i> | miR-4761-5p                 | 4 |
| <i>circLRRC49</i> | miR-4762-3p                 | 3 |
| <i>circLRRC49</i> | miR-4763-5p                 | 1 |
| <i>circLRRC49</i> | miR-4766-5p                 | 1 |
| <i>circLRRC49</i> | miR-4768-3p                 | 1 |
| <i>circLRRC49</i> | miR-4769-3p/6817-5p         | 1 |
| <i>circLRRC49</i> | miR-4772-3p                 | 4 |

|                   |                     |   |
|-------------------|---------------------|---|
| <i>circLRRC49</i> | miR-4773            | 5 |
| <i>circLRRC49</i> | miR-4774-3p         | 1 |
| <i>circLRRC49</i> | miR-4775            | 2 |
| <i>circLRRC49</i> | miR-4777-5p         | 2 |
| <i>circLRRC49</i> | miR-4778-3p         | 7 |
| <i>circLRRC49</i> | miR-4778-5p         | 3 |
| <i>circLRRC49</i> | miR-4781-3p         | 4 |
| <i>circLRRC49</i> | miR-4782-5p/5706    | 3 |
| <i>circLRRC49</i> | miR-4785            | 1 |
| <i>circLRRC49</i> | miR-4789-5p         | 1 |
| <i>circLRRC49</i> | miR-4790-3p         | 1 |
| <i>circLRRC49</i> | miR-4793-3p         | 5 |
| <i>circLRRC49</i> | miR-4795-3p         | 3 |
| <i>circLRRC49</i> | miR-4796-3p         | 1 |
| <i>circLRRC49</i> | miR-4797-5p         | 1 |
| <i>circLRRC49</i> | miR-4798-3p         | 3 |
| <i>circLRRC49</i> | miR-4799-5p         | 2 |
| <i>circLRRC49</i> | miR-4803            | 1 |
| <i>circLRRC49</i> | miR-484/3155        | 1 |
| <i>circLRRC49</i> | miR-487a-5p/487b-5p | 2 |
| <i>circLRRC49</i> | miR-488-3p          | 6 |
| <i>circLRRC49</i> | miR-488-5p          | 4 |
| <i>circLRRC49</i> | miR-489-3p          | 1 |
| <i>circLRRC49</i> | miR-490-3p          | 1 |
| <i>circLRRC49</i> | miR-490-5p          | 1 |
| <i>circLRRC49</i> | miR-493-3p          | 3 |
| <i>circLRRC49</i> | miR-493-5p          | 1 |
| <i>circLRRC49</i> | miR-494-3p          | 4 |
| <i>circLRRC49</i> | miR-495-3p          | 4 |
| <i>circLRRC49</i> | miR-4999-5p         | 1 |
| <i>circLRRC49</i> | miR-499a-3p/499b-3p | 6 |
| <i>circLRRC49</i> | miR-5000-5p         | 5 |
| <i>circLRRC49</i> | miR-5001-3p         | 1 |
| <i>circLRRC49</i> | miR-5004-5p         | 1 |
| <i>circLRRC49</i> | miR-5007-3p         | 5 |
| <i>circLRRC49</i> | miR-5007-5p         | 6 |
| <i>circLRRC49</i> | miR-5009-3p         | 1 |
| <i>circLRRC49</i> | miR-500a-3p         | 4 |

|                   |                             |   |
|-------------------|-----------------------------|---|
| <i>circLRRC49</i> | miR-500a-5p                 | 1 |
| <i>circLRRC49</i> | miR-5010-3p                 | 1 |
| <i>circLRRC49</i> | miR-5011-3p                 | 1 |
| <i>circLRRC49</i> | miR-5011-5p                 | 7 |
| <i>circLRRC49</i> | miR-504-3p                  | 1 |
| <i>circLRRC49</i> | miR-504-5p.1                | 1 |
| <i>circLRRC49</i> | miR-505-3p.2                | 5 |
| <i>circLRRC49</i> | miR-506-5p                  | 1 |
| <i>circLRRC49</i> | miR-507/557                 | 1 |
| <i>circLRRC49</i> | miR-508-3p                  | 3 |
| <i>circLRRC49</i> | miR-5087                    | 1 |
| <i>circLRRC49</i> | miR-5089-3p                 | 6 |
| <i>circLRRC49</i> | miR-509-3-5p/509-5p/4418    | 8 |
| <i>circLRRC49</i> | miR-5092                    | 4 |
| <i>circLRRC49</i> | miR-5094                    | 1 |
| <i>circLRRC49</i> | miR-5095/7151-3p            | 1 |
| <i>circLRRC49</i> | miR-5096                    | 1 |
| <i>circLRRC49</i> | miR-510-3p                  | 6 |
| <i>circLRRC49</i> | miR-5100                    | 4 |
| <i>circLRRC49</i> | miR-511-5p                  | 3 |
| <i>circLRRC49</i> | miR-512-5p                  | 1 |
| <i>circLRRC49</i> | miR-513a-3p/513c-3p/3606-3p | 1 |
| <i>circLRRC49</i> | miR-513a-5p                 | 1 |
| <i>circLRRC49</i> | miR-513b-3p                 | 3 |
| <i>circLRRC49</i> | miR-513c-5p/514b-5p         | 3 |
| <i>circLRRC49</i> | miR-515-5p/519e-5p          | 4 |
| <i>circLRRC49</i> | miR-516b-5p                 | 3 |
| <i>circLRRC49</i> | miR-517-5p                  | 2 |
| <i>circLRRC49</i> | miR-5186                    | 3 |
| <i>circLRRC49</i> | miR-5187-3p                 | 1 |
| <i>circLRRC49</i> | miR-518c-5p                 | 4 |
| <i>circLRRC49</i> | miR-518d-5p/519-5p          | 2 |
| <i>circLRRC49</i> | miR-5190                    | 5 |
| <i>circLRRC49</i> | miR-5192                    | 3 |
| <i>circLRRC49</i> | miR-5197-3p                 | 4 |
| <i>circLRRC49</i> | miR-519d-5p                 | 1 |
| <i>circLRRC49</i> | miR-522-3p                  | 5 |
| <i>circLRRC49</i> | miR-524-5p                  | 1 |



|                   |                                                                  |   |
|-------------------|------------------------------------------------------------------|---|
| <i>circLRRC49</i> | miR-525-5p                                                       | 3 |
| <i>circLRRC49</i> | miR-526b-5p                                                      | 4 |
| <i>circLRRC49</i> | miR-539-5p                                                       | 4 |
| <i>circLRRC49</i> | miR-543                                                          | 7 |
| <i>circLRRC49</i> | miR-545-3p                                                       | 5 |
| <i>circLRRC49</i> | miR-548ac/548bb-3p/548d-3p/548h-3p/548z                          | 2 |
| <i>circLRRC49</i> | miR-548ah-5p/3609                                                | 2 |
| <i>circLRRC49</i> | miR-548ai/548ag/548ba/570-5p                                     | 4 |
| <i>circLRRC49</i> | miR-548aj-5p/548f-5p/548g-5p/548x-5p                             | 4 |
| <i>circLRRC49</i> | miR-548an                                                        | 1 |
| <i>circLRRC49</i> | miR-548ap-3p/548aa/548t-3p                                       | 2 |
| <i>circLRRC49</i> | miR-548aq-3p/548am-3p/548aj-3p/548ah-3p/548ae-3p/548j-3p/548x-3p | 2 |
| <i>circLRRC49</i> | miR-548as-3p                                                     | 2 |
| <i>circLRRC49</i> | miR-548at-5p                                                     | 5 |
| <i>circLRRC49</i> | miR-548av-3p                                                     | 1 |
| <i>circLRRC49</i> | miR-548ay-3p/548at-3p                                            | 2 |
| <i>circLRRC49</i> | miR-548az-3p/548ar-3p/548a-3p/548e-3p/548f-3p                    | 2 |
| <i>circLRRC49</i> | miR-548az-5p/548t-5p                                             | 2 |
| <i>circLRRC49</i> | miR-548c-3p                                                      | 5 |
| <i>circLRRC49</i> | miR-548e-5p                                                      | 4 |
| <i>circLRRC49</i> | miR-548g-3p                                                      | 1 |
| <i>circLRRC49</i> | miR-548n                                                         | 2 |
| <i>circLRRC49</i> | miR-548p                                                         | 5 |
| <i>circLRRC49</i> | miR-548s                                                         | 1 |
| <i>circLRRC49</i> | miR-548v                                                         | 6 |
| <i>circLRRC49</i> | miR-550b-3p                                                      | 1 |
| <i>circLRRC49</i> | miR-552-5p                                                       | 1 |
| <i>circLRRC49</i> | miR-5571-3p                                                      | 1 |
| <i>circLRRC49</i> | miR-5571-5p                                                      | 2 |
| <i>circLRRC49</i> | miR-5572                                                         | 1 |
| <i>circLRRC49</i> | miR-5579-5p                                                      | 1 |
| <i>circLRRC49</i> | miR-5580-3p                                                      | 1 |
| <i>circLRRC49</i> | miR-5581-3p                                                      | 1 |
| <i>circLRRC49</i> | miR-5582-3p                                                      | 7 |
| <i>circLRRC49</i> | miR-5583-3p                                                      | 1 |
| <i>circLRRC49</i> | miR-5584-5p                                                      | 4 |
| <i>circLRRC49</i> | miR-5586-5p                                                      | 2 |
| <i>circLRRC49</i> | miR-5587-5p                                                      | 1 |

|                   |                 |   |
|-------------------|-----------------|---|
| <i>circLRRC49</i> | miR-5589-5p     | 1 |
| <i>circLRRC49</i> | miR-5591-3p     | 1 |
| <i>circLRRC49</i> | miR-561-3p      | 5 |
| <i>circLRRC49</i> | miR-561-5p      | 1 |
| <i>circLRRC49</i> | miR-5680        | 3 |
| <i>circLRRC49</i> | miR-5681a       | 1 |
| <i>circLRRC49</i> | miR-5681b       | 1 |
| <i>circLRRC49</i> | miR-5684        | 1 |
| <i>circLRRC49</i> | miR-569         | 2 |
| <i>circLRRC49</i> | miR-5691        | 1 |
| <i>circLRRC49</i> | miR-5692a       | 1 |
| <i>circLRRC49</i> | miR-5693        | 1 |
| <i>circLRRC49</i> | miR-5694        | 1 |
| <i>circLRRC49</i> | miR-5695        | 1 |
| <i>circLRRC49</i> | miR-5696        | 5 |
| <i>circLRRC49</i> | miR-5701        | 4 |
| <i>circLRRC49</i> | miR-5702        | 6 |
| <i>circLRRC49</i> | miR-573/3616-5p | 1 |
| <i>circLRRC49</i> | miR-575/4676-5p | 1 |
| <i>circLRRC49</i> | miR-576-3p      | 5 |
| <i>circLRRC49</i> | miR-576-5p      | 2 |
| <i>circLRRC49</i> | miR-577         | 1 |
| <i>circLRRC49</i> | miR-578         | 6 |
| <i>circLRRC49</i> | miR-579-3p      | 5 |
| <i>circLRRC49</i> | miR-580-3p      | 5 |
| <i>circLRRC49</i> | miR-580-5p      | 3 |
| <i>circLRRC49</i> | miR-581         | 1 |
| <i>circLRRC49</i> | miR-583         | 5 |
| <i>circLRRC49</i> | miR-584-3p      | 1 |
| <i>circLRRC49</i> | miR-586         | 1 |
| <i>circLRRC49</i> | miR-587         | 2 |
| <i>circLRRC49</i> | miR-588         | 1 |
| <i>circLRRC49</i> | miR-589-3p      | 5 |
| <i>circLRRC49</i> | miR-590-3p      | 4 |
| <i>circLRRC49</i> | miR-591         | 2 |
| <i>circLRRC49</i> | miR-592         | 5 |
| <i>circLRRC49</i> | miR-597-3p      | 1 |
| <i>circLRRC49</i> | miR-597-5p      | 1 |

|                   |                                      |   |
|-------------------|--------------------------------------|---|
| <i>circLRRC49</i> | miR-598-3p                           | 1 |
| <i>circLRRC49</i> | miR-599                              | 5 |
| <i>circLRRC49</i> | miR-600                              | 1 |
| <i>circLRRC49</i> | miR-604                              | 1 |
| <i>circLRRC49</i> | miR-605-3p                           | 4 |
| <i>circLRRC49</i> | miR-605-5p                           | 2 |
| <i>circLRRC49</i> | miR-6074                             | 3 |
| <i>circLRRC49</i> | miR-6077                             | 7 |
| <i>circLRRC49</i> | miR-6078                             | 1 |
| <i>circLRRC49</i> | miR-6079                             | 4 |
| <i>circLRRC49</i> | miR-608/4651                         | 1 |
| <i>circLRRC49</i> | miR-6083                             | 1 |
| <i>circLRRC49</i> | miR-609                              | 1 |
| <i>circLRRC49</i> | miR-612/1285-3p/3187-5p/5189-5p/6860 | 1 |
| <i>circLRRC49</i> | miR-6126                             | 3 |
| <i>circLRRC49</i> | miR-6128                             | 3 |
| <i>circLRRC49</i> | miR-6132/6836-5p                     | 4 |
| <i>circLRRC49</i> | miR-616-3p                           | 1 |
| <i>circLRRC49</i> | miR-6165                             | 2 |
| <i>circLRRC49</i> | miR-617                              | 1 |
| <i>circLRRC49</i> | miR-618                              | 3 |
| <i>circLRRC49</i> | miR-619-3p                           | 1 |
| <i>circLRRC49</i> | miR-621                              | 1 |
| <i>circLRRC49</i> | miR-622                              | 1 |
| <i>circLRRC49</i> | miR-627-3p                           | 4 |
| <i>circLRRC49</i> | miR-627-5p                           | 1 |
| <i>circLRRC49</i> | miR-629-3p                           | 4 |
| <i>circLRRC49</i> | miR-629-5p                           | 4 |
| <i>circLRRC49</i> | miR-631/3661                         | 1 |
| <i>circLRRC49</i> | miR-640                              | 1 |
| <i>circLRRC49</i> | miR-641/3617-5p                      | 3 |
| <i>circLRRC49</i> | miR-644a                             | 1 |
| <i>circLRRC49</i> | miR-649                              | 1 |
| <i>circLRRC49</i> | miR-6500-3p                          | 2 |
| <i>circLRRC49</i> | miR-6501-3p                          | 1 |
| <i>circLRRC49</i> | miR-6505-3p                          | 1 |
| <i>circLRRC49</i> | miR-6505-5p                          | 1 |
| <i>circLRRC49</i> | miR-6507-5p                          | 1 |

|                   |                             |   |
|-------------------|-----------------------------|---|
| <i>circLRRC49</i> | miR-6508-5p/8067            | 1 |
| <i>circLRRC49</i> | miR-6509-3p                 | 9 |
| <i>circLRRC49</i> | miR-6509-5p                 | 1 |
| <i>circLRRC49</i> | miR-651-3p                  | 2 |
| <i>circLRRC49</i> | miR-6510-5p                 | 2 |
| <i>circLRRC49</i> | miR-6512-5p                 | 1 |
| <i>circLRRC49</i> | miR-6515-5p                 | 4 |
| <i>circLRRC49</i> | miR-6516-3p                 | 1 |
| <i>circLRRC49</i> | miR-6516-5p                 | 1 |
| <i>circLRRC49</i> | miR-653-3p                  | 5 |
| <i>circLRRC49</i> | miR-654-3p                  | 3 |
| <i>circLRRC49</i> | miR-655-5p                  | 1 |
| <i>circLRRC49</i> | miR-656-3p                  | 6 |
| <i>circLRRC49</i> | miR-661                     | 1 |
| <i>circLRRC49</i> | miR-662                     | 1 |
| <i>circLRRC49</i> | miR-663b                    | 1 |
| <i>circLRRC49</i> | miR-665                     | 1 |
| <i>circLRRC49</i> | miR-668-3p                  | 1 |
| <i>circLRRC49</i> | miR-6719-3p                 | 1 |
| <i>circLRRC49</i> | miR-6720-5p                 | 2 |
| <i>circLRRC49</i> | miR-6730-3p                 | 1 |
| <i>circLRRC49</i> | miR-6730-5p                 | 1 |
| <i>circLRRC49</i> | miR-6731-5p/8085            | 1 |
| <i>circLRRC49</i> | miR-6732-3p                 | 1 |
| <i>circLRRC49</i> | miR-6734-5p                 | 1 |
| <i>circLRRC49</i> | miR-6735-3p                 | 1 |
| <i>circLRRC49</i> | miR-6736-3p                 | 1 |
| <i>circLRRC49</i> | miR-6737-5p/6812-5p/6819-5p | 1 |
| <i>circLRRC49</i> | miR-6740-3p                 | 7 |
| <i>circLRRC49</i> | miR-6742-3p                 | 1 |
| <i>circLRRC49</i> | miR-6743-3p                 | 1 |
| <i>circLRRC49</i> | miR-6747-3p                 | 1 |
| <i>circLRRC49</i> | miR-6747-5p                 | 1 |
| <i>circLRRC49</i> | miR-6749-3p                 | 4 |
| <i>circLRRC49</i> | miR-6750-3p                 | 3 |
| <i>circLRRC49</i> | miR-6750-5p/6822-5p         | 4 |
| <i>circLRRC49</i> | miR-6755-5p                 | 1 |
| <i>circLRRC49</i> | miR-6758-3p                 | 1 |

|                   |                     |   |
|-------------------|---------------------|---|
| <i>circLRRC49</i> | miR-676-5p          | 4 |
| <i>circLRRC49</i> | miR-6760-5p         | 2 |
| <i>circLRRC49</i> | miR-6761-5p         | 5 |
| <i>circLRRC49</i> | miR-6762-3p         | 1 |
| <i>circLRRC49</i> | miR-6764-3p/6824-3p | 4 |
| <i>circLRRC49</i> | miR-6767-5p         | 4 |
| <i>circLRRC49</i> | miR-6768-3p         | 1 |
| <i>circLRRC49</i> | miR-6770-5p         | 2 |
| <i>circLRRC49</i> | miR-6771-3p         | 1 |
| <i>circLRRC49</i> | miR-6772-5p         | 1 |
| <i>circLRRC49</i> | miR-6776-5p         | 1 |
| <i>circLRRC49</i> | miR-6777-3p         | 8 |
| <i>circLRRC49</i> | miR-6782-3p         | 2 |
| <i>circLRRC49</i> | miR-6787-3p         | 1 |
| <i>circLRRC49</i> | miR-6792-5p         | 3 |
| <i>circLRRC49</i> | miR-6793-3p         | 2 |
| <i>circLRRC49</i> | miR-6796-3p         | 1 |
| <i>circLRRC49</i> | miR-6799-5p         | 4 |
| <i>circLRRC49</i> | miR-6800-3p         | 1 |
| <i>circLRRC49</i> | miR-6800-5p         | 1 |
| <i>circLRRC49</i> | miR-6801-5p         | 4 |
| <i>circLRRC49</i> | miR-6802-5p         | 1 |
| <i>circLRRC49</i> | miR-6804-5p         | 5 |
| <i>circLRRC49</i> | miR-6808-3p         | 2 |
| <i>circLRRC49</i> | miR-6809-5p         | 5 |
| <i>circLRRC49</i> | miR-6814-3p/6872-5p | 4 |
| <i>circLRRC49</i> | miR-6814-5p         | 2 |
| <i>circLRRC49</i> | miR-6815-5p/6865-5p | 4 |
| <i>circLRRC49</i> | miR-6816-3p         | 3 |
| <i>circLRRC49</i> | miR-6817-3p         | 3 |
| <i>circLRRC49</i> | miR-6819-3p/6877-3p | 1 |
| <i>circLRRC49</i> | miR-6830-5p         | 1 |
| <i>circLRRC49</i> | miR-6833-5p         | 1 |
| <i>circLRRC49</i> | miR-6834-5p         | 1 |
| <i>circLRRC49</i> | miR-6840-3p         | 1 |
| <i>circLRRC49</i> | miR-6841-5p         | 1 |
| <i>circLRRC49</i> | miR-6843-3p/6848-3p | 4 |
| <i>circLRRC49</i> | miR-6844            | 1 |

|                   |             |   |
|-------------------|-------------|---|
| <i>circLRRC49</i> | miR-6845-3p | 4 |
| <i>circLRRC49</i> | miR-6847-3p | 3 |
| <i>circLRRC49</i> | miR-6847-5p | 1 |
| <i>circLRRC49</i> | miR-6849-3p | 2 |
| <i>circLRRC49</i> | miR-6852-5p | 1 |
| <i>circLRRC49</i> | miR-6854-5p | 2 |
| <i>circLRRC49</i> | miR-6858-3p | 1 |
| <i>circLRRC49</i> | miR-6861-5p | 1 |
| <i>circLRRC49</i> | miR-6864-5p | 3 |
| <i>circLRRC49</i> | miR-6865-3p | 1 |
| <i>circLRRC49</i> | miR-6868-5p | 3 |
| <i>circLRRC49</i> | miR-6870-3p | 1 |
| <i>circLRRC49</i> | miR-6871-5p | 8 |
| <i>circLRRC49</i> | miR-6873-3p | 4 |
| <i>circLRRC49</i> | miR-6875-3p | 8 |
| <i>circLRRC49</i> | miR-6878-3p | 1 |
| <i>circLRRC49</i> | miR-6878-5p | 1 |
| <i>circLRRC49</i> | miR-6882-3p | 1 |
| <i>circLRRC49</i> | miR-6885-3p | 3 |
| <i>circLRRC49</i> | miR-6886-5p | 4 |
| <i>circLRRC49</i> | miR-6888-3p | 1 |
| <i>circLRRC49</i> | miR-6888-5p | 4 |
| <i>circLRRC49</i> | miR-6890-3p | 4 |
| <i>circLRRC49</i> | miR-6892-3p | 1 |
| <i>circLRRC49</i> | miR-6892-5p | 1 |
| <i>circLRRC49</i> | miR-7-3p    | 5 |
| <i>circLRRC49</i> | miR-7-5p    | 7 |
| <i>circLRRC49</i> | miR-708-3p  | 1 |
| <i>circLRRC49</i> | miR-7106-5p | 4 |
| <i>circLRRC49</i> | miR-7108-5p | 1 |
| <i>circLRRC49</i> | miR-7110-3p | 3 |
| <i>circLRRC49</i> | miR-7112-3p | 3 |
| <i>circLRRC49</i> | miR-7114-5p | 1 |
| <i>circLRRC49</i> | miR-7150    | 1 |
| <i>circLRRC49</i> | miR-7152-3p | 1 |
| <i>circLRRC49</i> | miR-7152-5p | 2 |
| <i>circLRRC49</i> | miR-7159-3p | 5 |
| <i>circLRRC49</i> | miR-7159-5p | 5 |

|                   |              |   |
|-------------------|--------------|---|
| <i>circLRRC49</i> | miR-7160-5p  | 4 |
| <i>circLRRC49</i> | miR-7161-3p  | 1 |
| <i>circLRRC49</i> | miR-7162-3p  | 4 |
| <i>circLRRC49</i> | miR-7515     | 2 |
| <i>circLRRC49</i> | miR-758-3p   | 2 |
| <i>circLRRC49</i> | miR-759      | 1 |
| <i>circLRRC49</i> | miR-766-3p   | 3 |
| <i>circLRRC49</i> | miR-767-3p   | 1 |
| <i>circLRRC49</i> | miR-767-5p   | 4 |
| <i>circLRRC49</i> | miR-770-5p   | 4 |
| <i>circLRRC49</i> | miR-7703     | 1 |
| <i>circLRRC49</i> | miR-7848-3p  | 1 |
| <i>circLRRC49</i> | miR-7849-3p  | 2 |
| <i>circLRRC49</i> | miR-7851-3p  | 1 |
| <i>circLRRC49</i> | miR-7852-3p  | 1 |
| <i>circLRRC49</i> | miR-7855-5p  | 1 |
| <i>circLRRC49</i> | miR-7856-5p  | 1 |
| <i>circLRRC49</i> | miR-7973     | 1 |
| <i>circLRRC49</i> | miR-7975     | 1 |
| <i>circLRRC49</i> | miR-7977     | 3 |
| <i>circLRRC49</i> | miR-8055     | 3 |
| <i>circLRRC49</i> | miR-8060     | 2 |
| <i>circLRRC49</i> | miR-8062     | 2 |
| <i>circLRRC49</i> | miR-8063     | 1 |
| <i>circLRRC49</i> | miR-8066     | 1 |
| <i>circLRRC49</i> | miR-8068     | 4 |
| <i>circLRRC49</i> | miR-8070     | 1 |
| <i>circLRRC49</i> | miR-8077     | 4 |
| <i>circLRRC49</i> | miR-8080     | 3 |
| <i>circLRRC49</i> | miR-8083     | 1 |
| <i>circLRRC49</i> | miR-873-5p.1 | 4 |
| <i>circLRRC49</i> | miR-873-5p.2 | 4 |
| <i>circLRRC49</i> | miR-874-3p   | 1 |
| <i>circLRRC49</i> | miR-874-5p   | 1 |
| <i>circLRRC49</i> | miR-876-3p   | 4 |
| <i>circLRRC49</i> | miR-885-5p   | 3 |
| <i>circLRRC49</i> | miR-889-3p   | 3 |
| <i>circLRRC49</i> | miR-891a-3p  | 1 |

|                   |                         |   |
|-------------------|-------------------------|---|
| <i>circLRRC49</i> | miR-891b                | 1 |
| <i>circLRRC49</i> | miR-892-5p              | 1 |
| <i>circLRRC49</i> | miR-892a                | 1 |
| <i>circLRRC49</i> | miR-892b                | 1 |
| <i>circLRRC49</i> | miR-9-3p                | 4 |
| <i>circLRRC49</i> | miR-9-5p                | 1 |
| <i>circLRRC49</i> | miR-921                 | 3 |
| <i>circLRRC49</i> | miR-924                 | 1 |
| <i>circLRRC49</i> | miR-936                 | 1 |
| <i>circLRRC49</i> | miR-937-5p              | 1 |
| <i>circLRRC49</i> | miR-939-3p              | 1 |
| <i>circLRRC49</i> | miR-940/6808-5p/6893-5p | 8 |
| <i>circLRRC49</i> | miR-944                 | 4 |
| <i>circLRRC49</i> | miR-9500                | 4 |
| <i>circLRRC49</i> | miR-96-3p               | 2 |
| <i>circLRRC49</i> | miR-99-3p               | 1 |
| <i>circLRRC49</i> | miR-103a-2-5p           | 2 |
| <i>circLRRC49</i> | miR-1200                | 1 |
| <i>circLRRC49</i> | miR-1207-3p             | 3 |
| <i>circLRRC49</i> | miR-1208                | 6 |
| <i>circLRRC49</i> | miR-1236-3p             | 4 |
| <i>circLRRC49</i> | miR-1238-3p             | 4 |
| <i>circLRRC49</i> | miR-1266-3p             | 1 |
| <i>circLRRC49</i> | miR-1287-3p             | 2 |
| <i>circLRRC49</i> | miR-132-3p/212-3p       | 1 |
| <i>circLRRC49</i> | miR-16-2-3p/195-3p      | 2 |
| <i>circLRRC49</i> | miR-185-3p              | 4 |
| <i>circLRRC49</i> | miR-204-3p/4646-5p      | 1 |
| <i>circLRRC49</i> | miR-20a-3p              | 3 |
| <i>circLRRC49</i> | miR-2114-5p             | 2 |
| <i>circLRRC49</i> | miR-2115-5p             | 1 |
| <i>circLRRC49</i> | miR-215-3p              | 4 |
| <i>circLRRC49</i> | miR-219b-5p             | 4 |
| <i>circLRRC49</i> | miR-2467-3p             | 1 |
| <i>circLRRC49</i> | miR-29b-1-5p            | 2 |
| <i>circLRRC49</i> | miR-3064-3p             | 4 |
| <i>circLRRC49</i> | miR-31-3p               | 4 |
| <i>circLRRC49</i> | miR-3115                | 4 |



|                   |                                    |   |
|-------------------|------------------------------------|---|
| <i>circLRRC49</i> | miR-3124-3p                        | 2 |
| <i>circLRRC49</i> | miR-3126-5p                        | 4 |
| <i>circLRRC49</i> | miR-3192-5p                        | 1 |
| <i>circLRRC49</i> | miR-3674                           | 2 |
| <i>circLRRC49</i> | miR-378a-5p                        | 1 |
| <i>circLRRC49</i> | miR-3907                           | 1 |
| <i>circLRRC49</i> | miR-3908                           | 2 |
| <i>circLRRC49</i> | miR-3919                           | 1 |
| <i>circLRRC49</i> | miR-3942-5p                        | 2 |
| <i>circLRRC49</i> | miR-3977                           | 1 |
| <i>circLRRC49</i> | miR-4261                           | 4 |
| <i>circLRRC49</i> | miR-4291                           | 4 |
| <i>circLRRC49</i> | miR-4302                           | 4 |
| <i>circLRRC49</i> | miR-4314                           | 1 |
| <i>circLRRC49</i> | miR-4324                           | 2 |
| <i>circLRRC49</i> | miR-4419a/4510/6127/6129/6130/6133 | 4 |
| <i>circLRRC49</i> | miR-4496                           | 4 |
| <i>circLRRC49</i> | miR-450b-3p/769-3p                 | 4 |
| <i>circLRRC49</i> | miR-4522                           | 4 |
| <i>circLRRC49</i> | miR-4636                           | 2 |
| <i>circLRRC49</i> | miR-4659a-5p/4659b-5p              | 6 |
| <i>circLRRC49</i> | miR-4660                           | 3 |
| <i>circLRRC49</i> | miR-4684-3p                        | 2 |
| <i>circLRRC49</i> | miR-4693-3p                        | 2 |
| <i>circLRRC49</i> | miR-4747-5p/5196-5p                | 4 |
| <i>circLRRC49</i> | miR-4753-3p                        | 4 |
| <i>circLRRC49</i> | miR-4756-3p                        | 1 |
| <i>circLRRC49</i> | miR-4766-3p                        | 2 |
| <i>circLRRC49</i> | miR-4768-5p/6833-3p                | 5 |
| <i>circLRRC49</i> | miR-4776-3p                        | 4 |
| <i>circLRRC49</i> | miR-4786-5p                        | 1 |
| <i>circLRRC49</i> | miR-5089-5p                        | 4 |
| <i>circLRRC49</i> | miR-516a-3p/516b-3p/7162-5p        | 1 |
| <i>circLRRC49</i> | miR-544b                           | 2 |
| <i>circLRRC49</i> | miR-548m                           | 4 |
| <i>circLRRC49</i> | miR-5580-5p                        | 2 |
| <i>circLRRC49</i> | miR-5588-3p                        | 2 |
| <i>circLRRC49</i> | miR-5590-5p                        | 6 |

|                   |                     |   |
|-------------------|---------------------|---|
| <i>circLRRC49</i> | miR-5683            | 2 |
| <i>circLRRC49</i> | miR-5700            | 1 |
| <i>circLRRC49</i> | miR-582-3p          | 1 |
| <i>circLRRC49</i> | miR-610             | 6 |
| <i>circLRRC49</i> | miR-615-5p          | 1 |
| <i>circLRRC49</i> | miR-619-5p/6506-5p  | 1 |
| <i>circLRRC49</i> | miR-636             | 1 |
| <i>circLRRC49</i> | miR-648             | 4 |
| <i>circLRRC49</i> | miR-6511-3p         | 1 |
| <i>circLRRC49</i> | miR-6515-3p         | 4 |
| <i>circLRRC49</i> | miR-670-3p          | 4 |
| <i>circLRRC49</i> | miR-6716-5p         | 1 |
| <i>circLRRC49</i> | miR-6722-5p         | 3 |
| <i>circLRRC49</i> | miR-6728-3p         | 1 |
| <i>circLRRC49</i> | miR-6728-5p         | 4 |
| <i>circLRRC49</i> | miR-6733-3p         | 4 |
| <i>circLRRC49</i> | miR-6757-3p         | 4 |
| <i>circLRRC49</i> | miR-6758-5p/6856-5p | 1 |
| <i>circLRRC49</i> | miR-6760-3p         | 6 |
| <i>circLRRC49</i> | miR-6773-3p         | 4 |
| <i>circLRRC49</i> | miR-6780a-3p        | 4 |
| <i>circLRRC49</i> | miR-6782-5p         | 1 |
| <i>circLRRC49</i> | miR-6784-3p/6862-3p | 1 |
| <i>circLRRC49</i> | miR-6798-5p         | 1 |
| <i>circLRRC49</i> | miR-6809-3p         | 5 |
| <i>circLRRC49</i> | miR-6827-5p         | 1 |
| <i>circLRRC49</i> | miR-6834-3p         | 4 |
| <i>circLRRC49</i> | miR-6867-5p         | 4 |
| <i>circLRRC49</i> | miR-6873-5p         | 5 |
| <i>circLRRC49</i> | miR-6880-3p         | 2 |
| <i>circLRRC49</i> | miR-6881-3p         | 4 |
| <i>circLRRC49</i> | miR-6884-3p         | 5 |
| <i>circLRRC49</i> | miR-7111-3p         | 4 |
| <i>circLRRC49</i> | miR-7153-3p         | 4 |
| <i>circLRRC49</i> | miR-744-3p          | 2 |
| <i>circLRRC49</i> | miR-769-5p          | 1 |
| <i>circLRRC49</i> | miR-7704            | 1 |
| <i>circLRRC49</i> | miR-7844-5p         | 1 |

|                   |                      |   |
|-------------------|----------------------|---|
| <i>circLRRC49</i> | miR-942-5p           | 5 |
| <i>circLRRC7</i>  | miR-1179             | 1 |
| <i>circLRRC7</i>  | miR-1180-5p          | 1 |
| <i>circLRRC7</i>  | miR-1193             | 1 |
| <i>circLRRC7</i>  | miR-1225-5p          | 1 |
| <i>circLRRC7</i>  | miR-1229-5p          | 1 |
| <i>circLRRC7</i>  | miR-124-5p           | 1 |
| <i>circLRRC7</i>  | miR-1255a/1255b-5p   | 1 |
| <i>circLRRC7</i>  | miR-126-5p           | 2 |
| <i>circLRRC7</i>  | miR-1264             | 1 |
| <i>circLRRC7</i>  | miR-1279             | 1 |
| <i>circLRRC7</i>  | miR-129-5p           | 1 |
| <i>circLRRC7</i>  | miR-1295b-5p/1912    | 1 |
| <i>circLRRC7</i>  | miR-1303             | 1 |
| <i>circLRRC7</i>  | miR-1305             | 1 |
| <i>circLRRC7</i>  | miR-137              | 1 |
| <i>circLRRC7</i>  | miR-141-3p/200-3p    | 1 |
| <i>circLRRC7</i>  | miR-142-5p           | 1 |
| <i>circLRRC7</i>  | miR-155-5p           | 1 |
| <i>circLRRC7</i>  | miR-15b-3p           | 1 |
| <i>circLRRC7</i>  | miR-1910-3p/6511a-5p | 1 |
| <i>circLRRC7</i>  | miR-1915-3p/6764-5p  | 1 |
| <i>circLRRC7</i>  | miR-194-5p           | 2 |
| <i>circLRRC7</i>  | miR-197-5p/3132      | 1 |
| <i>circLRRC7</i>  | miR-203a-3p.1        | 1 |
| <i>circLRRC7</i>  | miR-2054             | 1 |
| <i>circLRRC7</i>  | miR-219-5p           | 1 |
| <i>circLRRC7</i>  | miR-219a-1-3p        | 1 |
| <i>circLRRC7</i>  | miR-223-5p           | 2 |
| <i>circLRRC7</i>  | miR-23-3p            | 1 |
| <i>circLRRC7</i>  | miR-2392             | 2 |
| <i>circLRRC7</i>  | miR-24-5p            | 1 |
| <i>circLRRC7</i>  | miR-26-3p            | 1 |
| <i>circLRRC7</i>  | miR-26-5p            | 1 |
| <i>circLRRC7</i>  | miR-27a-5p           | 1 |
| <i>circLRRC7</i>  | miR-302b-5p/302d-5p  | 1 |
| <i>circLRRC7</i>  | miR-3124-3p          | 1 |
| <i>circLRRC7</i>  | miR-3130-5p/4482-5p  | 1 |

|                  |                           |   |
|------------------|---------------------------|---|
| <i>circLRRC7</i> | miR-3135a                 | 1 |
| <i>circLRRC7</i> | miR-3144-3p               | 1 |
| <i>circLRRC7</i> | miR-3149                  | 2 |
| <i>circLRRC7</i> | miR-3152-5p               | 2 |
| <i>circLRRC7</i> | miR-3158-3p               | 1 |
| <i>circLRRC7</i> | miR-3184-3p               | 1 |
| <i>circLRRC7</i> | miR-33-5p                 | 1 |
| <i>circLRRC7</i> | miR-335-3p                | 4 |
| <i>circLRRC7</i> | miR-337-3p                | 1 |
| <i>circLRRC7</i> | miR-338-5p                | 1 |
| <i>circLRRC7</i> | miR-34b-5p/449c-5p        | 1 |
| <i>circLRRC7</i> | miR-3614-5p               | 1 |
| <i>circLRRC7</i> | miR-3671                  | 1 |
| <i>circLRRC7</i> | miR-3684                  | 1 |
| <i>circLRRC7</i> | miR-371-5p                | 1 |
| <i>circLRRC7</i> | miR-371b-5p/373-5p/616-5p | 1 |
| <i>circLRRC7</i> | miR-372-5p                | 1 |
| <i>circLRRC7</i> | miR-378g                  | 1 |
| <i>circLRRC7</i> | miR-382-5p                | 1 |
| <i>circLRRC7</i> | miR-3909                  | 1 |
| <i>circLRRC7</i> | miR-3912-5p               | 4 |
| <i>circLRRC7</i> | miR-412-3p/6754-3p        | 1 |
| <i>circLRRC7</i> | miR-4269/6715b-5p         | 2 |
| <i>circLRRC7</i> | miR-4287/4685-3p          | 1 |
| <i>circLRRC7</i> | miR-4289                  | 1 |
| <i>circLRRC7</i> | miR-432-3p                | 2 |
| <i>circLRRC7</i> | miR-4445-5p               | 1 |
| <i>circLRRC7</i> | miR-4446-3p               | 1 |
| <i>circLRRC7</i> | miR-4469                  | 1 |
| <i>circLRRC7</i> | miR-4482-3p               | 1 |
| <i>circLRRC7</i> | miR-4486                  | 1 |
| <i>circLRRC7</i> | miR-4514/4692             | 2 |
| <i>circLRRC7</i> | miR-452-3p                | 1 |
| <i>circLRRC7</i> | miR-452-5p/892-3p         | 1 |
| <i>circLRRC7</i> | miR-4528                  | 2 |
| <i>circLRRC7</i> | miR-4652-3p               | 1 |
| <i>circLRRC7</i> | miR-4660                  | 1 |
| <i>circLRRC7</i> | miR-4678                  | 1 |

|                  |                                      |   |
|------------------|--------------------------------------|---|
| <i>circLRRC7</i> | miR-4684-3p                          | 1 |
| <i>circLRRC7</i> | miR-4716-5p                          | 1 |
| <i>circLRRC7</i> | miR-4726-3p                          | 1 |
| <i>circLRRC7</i> | miR-4742-5p                          | 2 |
| <i>circLRRC7</i> | miR-4743-3p                          | 1 |
| <i>circLRRC7</i> | miR-4755-5p/5006-3p                  | 1 |
| <i>circLRRC7</i> | miR-4760-3p                          | 1 |
| <i>circLRRC7</i> | miR-4764-3p                          | 1 |
| <i>circLRRC7</i> | miR-4774-3p                          | 2 |
| <i>circLRRC7</i> | miR-4778-5p                          | 1 |
| <i>circLRRC7</i> | miR-4795-3p                          | 1 |
| <i>circLRRC7</i> | miR-4803                             | 1 |
| <i>circLRRC7</i> | miR-489-3p                           | 1 |
| <i>circLRRC7</i> | miR-495-5p                           | 1 |
| <i>circLRRC7</i> | miR-5003-3p                          | 1 |
| <i>circLRRC7</i> | miR-5004-3p                          | 1 |
| <i>circLRRC7</i> | miR-505-3p.1                         | 1 |
| <i>circLRRC7</i> | miR-508-3p                           | 1 |
| <i>circLRRC7</i> | miR-5088-5p                          | 1 |
| <i>circLRRC7</i> | miR-513a-3p/513c-3p/3606-3p          | 1 |
| <i>circLRRC7</i> | miR-513b-3p                          | 1 |
| <i>circLRRC7</i> | miR-514a-3p                          | 1 |
| <i>circLRRC7</i> | miR-525-5p                           | 2 |
| <i>circLRRC7</i> | miR-548az-5p/548t-5p                 | 1 |
| <i>circLRRC7</i> | miR-548n                             | 1 |
| <i>circLRRC7</i> | miR-552-5p                           | 1 |
| <i>circLRRC7</i> | miR-5580-3p                          | 2 |
| <i>circLRRC7</i> | miR-5581-3p                          | 1 |
| <i>circLRRC7</i> | miR-5586-5p                          | 3 |
| <i>circLRRC7</i> | miR-561-5p                           | 1 |
| <i>circLRRC7</i> | miR-5680                             | 1 |
| <i>circLRRC7</i> | miR-5700                             | 1 |
| <i>circLRRC7</i> | miR-571                              | 1 |
| <i>circLRRC7</i> | miR-586                              | 1 |
| <i>circLRRC7</i> | miR-589-3p                           | 1 |
| <i>circLRRC7</i> | miR-590-3p                           | 1 |
| <i>circLRRC7</i> | miR-607                              | 1 |
| <i>circLRRC7</i> | miR-612/1285-3p/3187-5p/5189-5p/6860 | 1 |

|                  |                         |   |
|------------------|-------------------------|---|
| <i>circLRRC7</i> | miR-640                 | 1 |
| <i>circLRRC7</i> | miR-642a-5p             | 1 |
| <i>circLRRC7</i> | miR-643                 | 1 |
| <i>circLRRC7</i> | miR-6500-3p             | 1 |
| <i>circLRRC7</i> | miR-6507-3p             | 1 |
| <i>circLRRC7</i> | miR-6511-3p             | 1 |
| <i>circLRRC7</i> | miR-664a-3p             | 1 |
| <i>circLRRC7</i> | miR-6724-5p/6773-5p     | 1 |
| <i>circLRRC7</i> | miR-6731-3p             | 1 |
| <i>circLRRC7</i> | miR-6736-3p             | 1 |
| <i>circLRRC7</i> | miR-6744-5p             | 1 |
| <i>circLRRC7</i> | miR-6784-3p/6862-3p     | 1 |
| <i>circLRRC7</i> | miR-6815-3p             | 1 |
| <i>circLRRC7</i> | miR-6830-3p             | 1 |
| <i>circLRRC7</i> | miR-6834-3p             | 1 |
| <i>circLRRC7</i> | miR-6837-3p             | 1 |
| <i>circLRRC7</i> | miR-6838-3p             | 1 |
| <i>circLRRC7</i> | miR-6840-3p             | 1 |
| <i>circLRRC7</i> | miR-6854-5p             | 1 |
| <i>circLRRC7</i> | miR-6883-3p             | 1 |
| <i>circLRRC7</i> | miR-7113-3p             | 1 |
| <i>circLRRC7</i> | miR-7151-5p             | 2 |
| <i>circLRRC7</i> | miR-7159-3p             | 1 |
| <i>circLRRC7</i> | miR-744-3p              | 1 |
| <i>circLRRC7</i> | miR-877-3p              | 1 |
| <i>circLRRC7</i> | miR-885-3p              | 1 |
| <i>circLRRC7</i> | miR-940/6808-5p/6893-5p | 1 |
| <i>circLRRC7</i> | miR-95-5p               | 1 |
| <i>circLRRC7</i> | let-7-5p/98-5p          | 2 |
| <i>circLRRC7</i> | miR-1-5p                | 1 |
| <i>circLRRC7</i> | miR-103-3p/107          | 2 |
| <i>circLRRC7</i> | miR-103a-2-5p           | 1 |
| <i>circLRRC7</i> | miR-1183                | 1 |
| <i>circLRRC7</i> | miR-1203                | 1 |
| <i>circLRRC7</i> | miR-1229-3p             | 1 |
| <i>circLRRC7</i> | miR-1237-3p             | 1 |
| <i>circLRRC7</i> | miR-1246                | 1 |
| <i>circLRRC7</i> | miR-1248                | 1 |

|                  |                                      |   |
|------------------|--------------------------------------|---|
| <i>circLRRC7</i> | miR-1251-3p                          | 1 |
| <i>circLRRC7</i> | miR-1255b-2-3p                       | 1 |
| <i>circLRRC7</i> | miR-1261                             | 2 |
| <i>circLRRC7</i> | miR-1273g-3p                         | 1 |
| <i>circLRRC7</i> | miR-1281                             | 1 |
| <i>circLRRC7</i> | miR-1287-5p                          | 1 |
| <i>circLRRC7</i> | miR-1290                             | 1 |
| <i>circLRRC7</i> | miR-1293/4483                        | 1 |
| <i>circLRRC7</i> | miR-1295b-3p                         | 1 |
| <i>circLRRC7</i> | miR-1296-5p                          | 1 |
| <i>circLRRC7</i> | miR-1299                             | 6 |
| <i>circLRRC7</i> | miR-1302/4298                        | 1 |
| <i>circLRRC7</i> | miR-1323                             | 4 |
| <i>circLRRC7</i> | miR-134-5p                           | 1 |
| <i>circLRRC7</i> | miR-135a-3p                          | 1 |
| <i>circLRRC7</i> | miR-136-5p                           | 1 |
| <i>circLRRC7</i> | miR-139-3p                           | 1 |
| <i>circLRRC7</i> | miR-144-5p                           | 1 |
| <i>circLRRC7</i> | miR-146a-3p                          | 1 |
| <i>circLRRC7</i> | miR-148b-5p/6874-3p                  | 1 |
| <i>circLRRC7</i> | miR-15-5p/16-5p/195-5p/424-5p/497-5p | 1 |
| <i>circLRRC7</i> | miR-150-5p                           | 1 |
| <i>circLRRC7</i> | miR-151-3p                           | 1 |
| <i>circLRRC7</i> | miR-154-5p                           | 1 |
| <i>circLRRC7</i> | miR-183-3p                           | 1 |
| <i>circLRRC7</i> | miR-1911-3p                          | 3 |
| <i>circLRRC7</i> | miR-1914-5p                          | 1 |
| <i>circLRRC7</i> | miR-192-3p                           | 1 |
| <i>circLRRC7</i> | miR-196-5p                           | 1 |
| <i>circLRRC7</i> | miR-198                              | 1 |
| <i>circLRRC7</i> | miR-205-5p                           | 1 |
| <i>circLRRC7</i> | miR-20a-3p                           | 1 |
| <i>circLRRC7</i> | miR-2116-3p                          | 1 |
| <i>circLRRC7</i> | miR-2116-5p                          | 1 |
| <i>circLRRC7</i> | miR-214-5p                           | 1 |
| <i>circLRRC7</i> | miR-22-5p                            | 1 |
| <i>circLRRC7</i> | miR-224-5p                           | 1 |
| <i>circLRRC7</i> | miR-2276-3p                          | 1 |

|                  |                   |   |
|------------------|-------------------|---|
| <i>circLRRC7</i> | miR-2355-3p       | 2 |
| <i>circLRRC7</i> | miR-29-3p         | 1 |
| <i>circLRRC7</i> | miR-299-3p        | 1 |
| <i>circLRRC7</i> | miR-29b-1-5p      | 1 |
| <i>circLRRC7</i> | miR-302f          | 1 |
| <i>circLRRC7</i> | miR-3119          | 1 |
| <i>circLRRC7</i> | miR-3121-5p       | 1 |
| <i>circLRRC7</i> | miR-3122/3913-5p  | 1 |
| <i>circLRRC7</i> | miR-3135b         | 1 |
| <i>circLRRC7</i> | miR-3136-5p/4439  | 1 |
| <i>circLRRC7</i> | miR-3154          | 1 |
| <i>circLRRC7</i> | miR-3157-3p       | 1 |
| <i>circLRRC7</i> | miR-3159          | 2 |
| <i>circLRRC7</i> | miR-3164          | 1 |
| <i>circLRRC7</i> | miR-3168          | 1 |
| <i>circLRRC7</i> | miR-3182          | 1 |
| <i>circLRRC7</i> | miR-3187-3p       | 1 |
| <i>circLRRC7</i> | miR-3194-3p       | 1 |
| <i>circLRRC7</i> | miR-3200-5p       | 1 |
| <i>circLRRC7</i> | miR-3201/4791     | 1 |
| <i>circLRRC7</i> | miR-326           | 1 |
| <i>circLRRC7</i> | miR-33a-3p        | 1 |
| <i>circLRRC7</i> | miR-342-3p        | 1 |
| <i>circLRRC7</i> | miR-346           | 1 |
| <i>circLRRC7</i> | miR-3611          | 1 |
| <i>circLRRC7</i> | miR-363-5p/6745   | 1 |
| <i>circLRRC7</i> | miR-3649          | 1 |
| <i>circLRRC7</i> | miR-3655          | 3 |
| <i>circLRRC7</i> | miR-3657          | 3 |
| <i>circLRRC7</i> | miR-3662          | 1 |
| <i>circLRRC7</i> | miR-3681-5p       | 1 |
| <i>circLRRC7</i> | miR-3682-3p       | 1 |
| <i>circLRRC7</i> | miR-3689d/6851-5p | 1 |
| <i>circLRRC7</i> | miR-3691-3p       | 1 |
| <i>circLRRC7</i> | miR-3691-5p       | 1 |
| <i>circLRRC7</i> | miR-3692-3p       | 1 |
| <i>circLRRC7</i> | miR-3692-5p       | 1 |
| <i>circLRRC7</i> | miR-375           | 1 |



|                  |                                              |   |
|------------------|----------------------------------------------|---|
| <i>circLRRC7</i> | miR-376b-5p/376c-5p                          | 2 |
| <i>circLRRC7</i> | miR-377-3p                                   | 1 |
| <i>circLRRC7</i> | miR-378j/6839-5p                             | 3 |
| <i>circLRRC7</i> | miR-3922-5p                                  | 1 |
| <i>circLRRC7</i> | miR-3927-3p/6831-5p                          | 1 |
| <i>circLRRC7</i> | miR-3929/4419b/4478                          | 5 |
| <i>circLRRC7</i> | miR-3977                                     | 1 |
| <i>circLRRC7</i> | miR-409-3p                                   | 2 |
| <i>circLRRC7</i> | miR-423-5p                                   | 1 |
| <i>circLRRC7</i> | miR-4252                                     | 1 |
| <i>circLRRC7</i> | miR-4258                                     | 1 |
| <i>circLRRC7</i> | miR-4266                                     | 1 |
| <i>circLRRC7</i> | miR-4281                                     | 1 |
| <i>circLRRC7</i> | miR-4297/5581-5p                             | 1 |
| <i>circLRRC7</i> | miR-4310/7157-5p                             | 2 |
| <i>circLRRC7</i> | miR-4317                                     | 1 |
| <i>circLRRC7</i> | miR-4320                                     | 2 |
| <i>circLRRC7</i> | miR-4423-3p                                  | 1 |
| <i>circLRRC7</i> | miR-4427                                     | 1 |
| <i>circLRRC7</i> | miR-4435                                     | 1 |
| <i>circLRRC7</i> | miR-4436b-3p/4632-5p/6735-5p/6879-5p/7843-5p | 1 |
| <i>circLRRC7</i> | miR-4436b-5p                                 | 1 |
| <i>circLRRC7</i> | miR-4450                                     | 1 |
| <i>circLRRC7</i> | miR-4452                                     | 1 |
| <i>circLRRC7</i> | miR-4464/4748                                | 3 |
| <i>circLRRC7</i> | miR-4474-3p                                  | 1 |
| <i>circLRRC7</i> | miR-4474-5p                                  | 1 |
| <i>circLRRC7</i> | miR-4480                                     | 1 |
| <i>circLRRC7</i> | miR-4485-5p                                  | 1 |
| <i>circLRRC7</i> | miR-4491/4657                                | 1 |
| <i>circLRRC7</i> | miR-4493                                     | 1 |
| <i>circLRRC7</i> | miR-4503                                     | 1 |
| <i>circLRRC7</i> | miR-450a-1-3p                                | 1 |
| <i>circLRRC7</i> | miR-4513/6855-3p                             | 1 |
| <i>circLRRC7</i> | miR-4532                                     | 1 |
| <i>circLRRC7</i> | miR-4645-5p/4673                             | 3 |
| <i>circLRRC7</i> | miR-4646-3p                                  | 2 |
| <i>circLRRC7</i> | miR-4649-3p                                  | 1 |

|                  |                     |   |
|------------------|---------------------|---|
| <i>circLRRC7</i> | miR-4663            | 1 |
| <i>circLRRC7</i> | miR-4666b           | 1 |
| <i>circLRRC7</i> | miR-4669            | 3 |
| <i>circLRRC7</i> | miR-4677-3p         | 1 |
| <i>circLRRC7</i> | miR-4679            | 1 |
| <i>circLRRC7</i> | miR-4680-3p         | 1 |
| <i>circLRRC7</i> | miR-4683            | 1 |
| <i>circLRRC7</i> | miR-4707-5p         | 1 |
| <i>circLRRC7</i> | miR-4709-3p         | 2 |
| <i>circLRRC7</i> | miR-4713-3p         | 1 |
| <i>circLRRC7</i> | miR-4717-5p         | 1 |
| <i>circLRRC7</i> | miR-4719            | 1 |
| <i>circLRRC7</i> | miR-4722-3p/6727-3p | 1 |
| <i>circLRRC7</i> | miR-4724-5p         | 1 |
| <i>circLRRC7</i> | miR-4727-5p         | 1 |
| <i>circLRRC7</i> | miR-4728-3p         | 3 |
| <i>circLRRC7</i> | miR-4731-3p/4801    | 1 |
| <i>circLRRC7</i> | miR-4735-5p         | 1 |
| <i>circLRRC7</i> | miR-4742-3p         | 1 |
| <i>circLRRC7</i> | miR-4753-5p         | 1 |
| <i>circLRRC7</i> | miR-4755-3p         | 1 |
| <i>circLRRC7</i> | miR-4761-3p         | 1 |
| <i>circLRRC7</i> | miR-4761-5p         | 1 |
| <i>circLRRC7</i> | miR-4762-3p         | 1 |
| <i>circLRRC7</i> | miR-4763-5p         | 2 |
| <i>circLRRC7</i> | miR-4764-5p         | 1 |
| <i>circLRRC7</i> | miR-4766-5p         | 2 |
| <i>circLRRC7</i> | miR-4772-3p         | 1 |
| <i>circLRRC7</i> | miR-4777-3p         | 1 |
| <i>circLRRC7</i> | miR-4778-3p         | 2 |
| <i>circLRRC7</i> | miR-4781-3p         | 2 |
| <i>circLRRC7</i> | miR-4782-5p/5706    | 6 |
| <i>circLRRC7</i> | miR-4790-3p         | 1 |
| <i>circLRRC7</i> | miR-4799-5p         | 1 |
| <i>circLRRC7</i> | miR-483-3p.1        | 1 |
| <i>circLRRC7</i> | miR-484/3155        | 5 |
| <i>circLRRC7</i> | miR-493-3p          | 1 |
| <i>circLRRC7</i> | miR-5001-3p         | 1 |

|                  |                                               |   |
|------------------|-----------------------------------------------|---|
| <i>circLRRC7</i> | miR-5011-3p                                   | 1 |
| <i>circLRRC7</i> | miR-502-5p                                    | 1 |
| <i>circLRRC7</i> | miR-503-5p                                    | 1 |
| <i>circLRRC7</i> | miR-5087                                      | 3 |
| <i>circLRRC7</i> | miR-516b-5p                                   | 6 |
| <i>circLRRC7</i> | miR-5187-3p                                   | 1 |
| <i>circLRRC7</i> | miR-518c-5p                                   | 1 |
| <i>circLRRC7</i> | miR-5194                                      | 1 |
| <i>circLRRC7</i> | miR-526b-5p                                   | 1 |
| <i>circLRRC7</i> | miR-532-3p                                    | 1 |
| <i>circLRRC7</i> | miR-539-3p                                    | 1 |
| <i>circLRRC7</i> | miR-544a                                      | 1 |
| <i>circLRRC7</i> | miR-548av-3p                                  | 4 |
| <i>circLRRC7</i> | miR-548az-3p/548ar-3p/548a-3p/548e-3p/548f-3p | 1 |
| <i>circLRRC7</i> | miR-548s                                      | 1 |
| <i>circLRRC7</i> | miR-5582-3p                                   | 4 |
| <i>circLRRC7</i> | miR-5584-3p                                   | 1 |
| <i>circLRRC7</i> | miR-5585-3p                                   | 5 |
| <i>circLRRC7</i> | miR-5587-3p                                   | 1 |
| <i>circLRRC7</i> | miR-5587-5p                                   | 1 |
| <i>circLRRC7</i> | miR-5691                                      | 1 |
| <i>circLRRC7</i> | miR-5701                                      | 1 |
| <i>circLRRC7</i> | miR-578                                       | 2 |
| <i>circLRRC7</i> | miR-587                                       | 4 |
| <i>circLRRC7</i> | miR-588                                       | 1 |
| <i>circLRRC7</i> | miR-592                                       | 1 |
| <i>circLRRC7</i> | miR-599                                       | 1 |
| <i>circLRRC7</i> | miR-604                                       | 5 |
| <i>circLRRC7</i> | miR-605-3p                                    | 1 |
| <i>circLRRC7</i> | miR-605-5p                                    | 1 |
| <i>circLRRC7</i> | miR-6068                                      | 1 |
| <i>circLRRC7</i> | miR-6083                                      | 1 |
| <i>circLRRC7</i> | miR-6126                                      | 3 |
| <i>circLRRC7</i> | miR-627-3p                                    | 1 |
| <i>circLRRC7</i> | miR-628-5p                                    | 2 |
| <i>circLRRC7</i> | miR-638                                       | 1 |
| <i>circLRRC7</i> | miR-646                                       | 1 |
| <i>circLRRC7</i> | miR-647                                       | 1 |

|                  |                     |   |
|------------------|---------------------|---|
| <i>circLRRC7</i> | miR-6509-3p         | 1 |
| <i>circLRRC7</i> | miR-6513-3p         | 1 |
| <i>circLRRC7</i> | miR-6513-5p         | 1 |
| <i>circLRRC7</i> | miR-6514-3p         | 2 |
| <i>circLRRC7</i> | miR-663b            | 1 |
| <i>circLRRC7</i> | miR-668-3p          | 1 |
| <i>circLRRC7</i> | miR-6721-5p         | 1 |
| <i>circLRRC7</i> | miR-6729-3p         | 1 |
| <i>circLRRC7</i> | miR-6735-3p         | 1 |
| <i>circLRRC7</i> | miR-6738-3p         | 1 |
| <i>circLRRC7</i> | miR-6747-3p         | 1 |
| <i>circLRRC7</i> | miR-6756-5p/6766-5p | 1 |
| <i>circLRRC7</i> | miR-6762-3p         | 5 |
| <i>circLRRC7</i> | miR-6763-3p         | 1 |
| <i>circLRRC7</i> | miR-6764-3p/6824-3p | 1 |
| <i>circLRRC7</i> | miR-6772-3p         | 1 |
| <i>circLRRC7</i> | miR-6778-3p         | 1 |
| <i>circLRRC7</i> | miR-6783-5p         | 1 |
| <i>circLRRC7</i> | miR-6791-3p/6829-3p | 1 |
| <i>circLRRC7</i> | miR-6792-5p         | 2 |
| <i>circLRRC7</i> | miR-6811-3p         | 1 |
| <i>circLRRC7</i> | miR-6814-5p         | 1 |
| <i>circLRRC7</i> | miR-6832-3p         | 1 |
| <i>circLRRC7</i> | miR-6842-3p         | 1 |
| <i>circLRRC7</i> | miR-6846-3p         | 1 |
| <i>circLRRC7</i> | miR-6857-3p         | 1 |
| <i>circLRRC7</i> | miR-6859-3p         | 1 |
| <i>circLRRC7</i> | miR-6864-5p         | 3 |
| <i>circLRRC7</i> | miR-6868-3p         | 1 |
| <i>circLRRC7</i> | miR-6871-3p         | 1 |
| <i>circLRRC7</i> | miR-6873-5p         | 1 |
| <i>circLRRC7</i> | miR-6878-3p         | 1 |
| <i>circLRRC7</i> | miR-6882-3p         | 1 |
| <i>circLRRC7</i> | miR-6884-3p         | 3 |
| <i>circLRRC7</i> | miR-6886-3p         | 1 |
| <i>circLRRC7</i> | miR-6888-5p         | 1 |
| <i>circLRRC7</i> | miR-6894-3p         | 2 |
| <i>circLRRC7</i> | miR-7106-3p         | 1 |

|                  |                     |   |
|------------------|---------------------|---|
| <i>circLRRC7</i> | miR-7108-3p         | 1 |
| <i>circLRRC7</i> | miR-7108-5p         | 1 |
| <i>circLRRC7</i> | miR-711             | 1 |
| <i>circLRRC7</i> | miR-7160-5p         | 1 |
| <i>circLRRC7</i> | miR-7162-3p         | 1 |
| <i>circLRRC7</i> | miR-767-3p          | 2 |
| <i>circLRRC7</i> | miR-7702            | 1 |
| <i>circLRRC7</i> | miR-7855-5p         | 1 |
| <i>circLRRC7</i> | miR-8056            | 1 |
| <i>circLRRC7</i> | miR-8068            | 1 |
| <i>circLRRC7</i> | miR-8069            | 1 |
| <i>circLRRC7</i> | miR-8077            | 1 |
| <i>circLRRC7</i> | miR-874-3p          | 1 |
| <i>circLRRC7</i> | miR-875-5p          | 1 |
| <i>circLRRC7</i> | miR-876-5p          | 1 |
| <i>circLRRC7</i> | miR-887-5p          | 1 |
| <i>circLRRC7</i> | miR-9-5p            | 1 |
| <i>circLRRC7</i> | miR-93-3p           | 1 |
| <i>circLRRC7</i> | miR-938             | 1 |
| <i>circLRRC7</i> | miR-943             | 1 |
| <i>circLRRC7</i> | miR-95-3p           | 1 |
| <i>circLRRC7</i> | miR-1184            | 2 |
| <i>circLRRC7</i> | miR-1205            | 2 |
| <i>circLRRC7</i> | miR-1226-3p         | 2 |
| <i>circLRRC7</i> | miR-1252-5p         | 2 |
| <i>circLRRC7</i> | miR-143-5p          | 2 |
| <i>circLRRC7</i> | miR-17-3p           | 2 |
| <i>circLRRC7</i> | miR-197-3p          | 2 |
| <i>circLRRC7</i> | miR-199-3p          | 6 |
| <i>circLRRC7</i> | miR-200ab-5p        | 2 |
| <i>circLRRC7</i> | miR-2276-5p         | 1 |
| <i>circLRRC7</i> | miR-301a-5p/301b-5p | 1 |
| <i>circLRRC7</i> | miR-3136-3p/7155-3p | 2 |
| <i>circLRRC7</i> | miR-3158-5p         | 2 |
| <i>circLRRC7</i> | miR-3176/3922-3p    | 2 |
| <i>circLRRC7</i> | miR-3190-5p         | 2 |
| <i>circLRRC7</i> | miR-325             | 2 |
| <i>circLRRC7</i> | miR-328-3p          | 2 |

|                  |                       |   |
|------------------|-----------------------|---|
| <i>circLRRC7</i> | miR-374a-3p           | 2 |
| <i>circLRRC7</i> | miR-3921/4653-5p      | 1 |
| <i>circLRRC7</i> | miR-4539              | 2 |
| <i>circLRRC7</i> | miR-455-3p.2          | 2 |
| <i>circLRRC7</i> | miR-4641              | 2 |
| <i>circLRRC7</i> | miR-4661-3p           | 2 |
| <i>circLRRC7</i> | miR-4662a-3p          | 2 |
| <i>circLRRC7</i> | miR-4733-3p           | 2 |
| <i>circLRRC7</i> | miR-4780              | 1 |
| <i>circLRRC7</i> | miR-495-3p            | 2 |
| <i>circLRRC7</i> | miR-5580-5p           | 2 |
| <i>circLRRC7</i> | miR-628-3p            | 2 |
| <i>circLRRC7</i> | miR-6732-3p           | 2 |
| <i>circLRRC7</i> | miR-6753-5p           | 2 |
| <i>circLRRC7</i> | miR-6780b-3p          | 1 |
| <i>circLRRC7</i> | miR-6892-3p           | 1 |
| <i>circLRRC7</i> | miR-7848-3p           | 2 |
| <i>circLRRC7</i> | miR-936               | 6 |
| <i>circLRRC7</i> | let-7a-2-3p/let-7g-3p | 3 |
| <i>circLRRC7</i> | let-7c-3p             | 3 |
| <i>circLRRC7</i> | miR-10-5p             | 1 |
| <i>circLRRC7</i> | miR-1236-3p           | 4 |
| <i>circLRRC7</i> | miR-1244              | 4 |
| <i>circLRRC7</i> | miR-1266-3p           | 1 |
| <i>circLRRC7</i> | miR-1267              | 1 |
| <i>circLRRC7</i> | miR-208-5p            | 4 |
| <i>circLRRC7</i> | miR-222-5p            | 4 |
| <i>circLRRC7</i> | miR-2682-3p/6781-3p   | 1 |
| <i>circLRRC7</i> | miR-3140-3p           | 4 |
| <i>circLRRC7</i> | miR-3140-5p           | 1 |
| <i>circLRRC7</i> | miR-339-5p            | 1 |
| <i>circLRRC7</i> | miR-345-3p            | 1 |
| <i>circLRRC7</i> | miR-3618              | 4 |
| <i>circLRRC7</i> | miR-367-5p            | 1 |
| <i>circLRRC7</i> | miR-374-5p/655-3p     | 4 |
| <i>circLRRC7</i> | miR-3924              | 3 |
| <i>circLRRC7</i> | miR-3978              | 4 |
| <i>circLRRC7</i> | miR-4261              | 4 |

|                     |                                       |   |
|---------------------|---------------------------------------|---|
| <i>circLRRC7</i>    | miR-4273/7156-5p                      | 4 |
| <i>circLRRC7</i>    | miR-4318                              | 7 |
| <i>circLRRC7</i>    | miR-4677-5p                           | 4 |
| <i>circLRRC7</i>    | miR-4693-5p                           | 4 |
| <i>circLRRC7</i>    | miR-4738-3p                           | 4 |
| <i>circLRRC7</i>    | miR-493-5p                            | 3 |
| <i>circLRRC7</i>    | miR-504-5p.1                          | 1 |
| <i>circLRRC7</i>    | miR-524-5p                            | 3 |
| <i>circLRRC7</i>    | miR-584-3p                            | 3 |
| <i>circLRRC7</i>    | miR-601                               | 4 |
| <i>circLRRC7</i>    | miR-6128                              | 4 |
| <i>circLRRC7</i>    | miR-618                               | 4 |
| <i>circLRRC7</i>    | miR-6515-3p                           | 4 |
| <i>circLRRC7</i>    | miR-6516-3p                           | 4 |
| <i>circLRRC7</i>    | miR-676-5p                            | 4 |
| <i>circLRRC7</i>    | miR-6836-3p                           | 1 |
| <i>circLRRC7</i>    | miR-708-3p                            | 4 |
| <i>circLRRC7</i>    | miR-892a                              | 7 |
| <i>circLRRC7</i>    | miR-934                               | 4 |
| <i>circLY86-AS1</i> | let-7a-3p/let-7b-3p/let-7f-1-3p/98-3p | 2 |
| <i>circLY86-AS1</i> | let-7f-2-3p/1185-3p                   | 2 |
| <i>circLY86-AS1</i> | miR-1-3p/206                          | 3 |
| <i>circLY86-AS1</i> | miR-1-5p                              | 2 |
| <i>circLY86-AS1</i> | miR-10-5p                             | 1 |
| <i>circLY86-AS1</i> | miR-101-3p.1                          | 1 |
| <i>circLY86-AS1</i> | miR-1178-3p                           | 2 |
| <i>circLY86-AS1</i> | miR-1197                              | 1 |
| <i>circLY86-AS1</i> | miR-1231                              | 1 |
| <i>circLY86-AS1</i> | miR-1237-3p                           | 1 |
| <i>circLY86-AS1</i> | miR-1243                              | 2 |
| <i>circLY86-AS1</i> | miR-1245b-3p                          | 3 |
| <i>circLY86-AS1</i> | miR-1245b-5p                          | 2 |
| <i>circLY86-AS1</i> | miR-1246                              | 3 |
| <i>circLY86-AS1</i> | miR-1248                              | 1 |
| <i>circLY86-AS1</i> | miR-1249-5p/6797-5p                   | 2 |
| <i>circLY86-AS1</i> | miR-1250-3p                           | 2 |
| <i>circLY86-AS1</i> | miR-1252-3p                           | 1 |
| <i>circLY86-AS1</i> | miR-1257                              | 1 |

|                     |                                     |   |
|---------------------|-------------------------------------|---|
| <i>circLY86-AS1</i> | miR-1261                            | 1 |
| <i>circLY86-AS1</i> | miR-1262/4701-3p/6736-5p            | 2 |
| <i>circLY86-AS1</i> | miR-1266-3p                         | 2 |
| <i>circLY86-AS1</i> | miR-1267                            | 2 |
| <i>circLY86-AS1</i> | miR-1269                            | 1 |
| <i>circLY86-AS1</i> | miR-1273f                           | 2 |
| <i>circLY86-AS1</i> | miR-1276                            | 1 |
| <i>circLY86-AS1</i> | miR-1277-5p                         | 4 |
| <i>circLY86-AS1</i> | miR-128-1-5p                        | 1 |
| <i>circLY86-AS1</i> | miR-1287-5p                         | 3 |
| <i>circLY86-AS1</i> | miR-1293/4483                       | 2 |
| <i>circLY86-AS1</i> | miR-1298-5p                         | 1 |
| <i>circLY86-AS1</i> | miR-130-3p/301-3p/454-3p            | 1 |
| <i>circLY86-AS1</i> | miR-1304-5p                         | 1 |
| <i>circLY86-AS1</i> | miR-1323                            | 1 |
| <i>circLY86-AS1</i> | miR-1324                            | 1 |
| <i>circLY86-AS1</i> | miR-133a-3p.1                       | 3 |
| <i>circLY86-AS1</i> | miR-138-2-3p                        | 1 |
| <i>circLY86-AS1</i> | miR-139-3p                          | 2 |
| <i>circLY86-AS1</i> | miR-142-3p.2                        | 1 |
| <i>circLY86-AS1</i> | miR-143-3p                          | 2 |
| <i>circLY86-AS1</i> | miR-144-3p                          | 1 |
| <i>circLY86-AS1</i> | miR-144-5p                          | 2 |
| <i>circLY86-AS1</i> | miR-148a-5p                         | 1 |
| <i>circLY86-AS1</i> | miR-148b-5p/6874-3p                 | 1 |
| <i>circLY86-AS1</i> | miR-154-3p/487-3p                   | 2 |
| <i>circLY86-AS1</i> | miR-155-3p                          | 3 |
| <i>circLY86-AS1</i> | miR-15a-3p                          | 1 |
| <i>circLY86-AS1</i> | miR-16-2-3p/195-3p                  | 2 |
| <i>circLY86-AS1</i> | miR-17-5p/20-5p/93-5p/106-5p/519-3p | 1 |
| <i>circLY86-AS1</i> | miR-18-5p                           | 2 |
| <i>circLY86-AS1</i> | miR-182-3p                          | 2 |
| <i>circLY86-AS1</i> | miR-186-5p                          | 3 |
| <i>circLY86-AS1</i> | miR-188-5p                          | 2 |
| <i>circLY86-AS1</i> | miR-19-3p                           | 1 |
| <i>circLY86-AS1</i> | miR-190a-3p                         | 2 |
| <i>circLY86-AS1</i> | miR-1914-5p                         | 3 |
| <i>circLY86-AS1</i> | miR-192-5p/215-5p                   | 2 |



|                     |                                              |   |
|---------------------|----------------------------------------------|---|
| <i>circLY86-AS1</i> | miR-198                                      | 4 |
| <i>circLY86-AS1</i> | miR-199-3p                                   | 1 |
| <i>circLY86-AS1</i> | miR-200-3p/429                               | 2 |
| <i>circLY86-AS1</i> | miR-203a-3p.1                                | 1 |
| <i>circLY86-AS1</i> | miR-203b-3p                                  | 2 |
| <i>circLY86-AS1</i> | miR-204-3p/4646-5p                           | 2 |
| <i>circLY86-AS1</i> | miR-211-3p                                   | 5 |
| <i>circLY86-AS1</i> | miR-2116-5p                                  | 1 |
| <i>circLY86-AS1</i> | miR-214-5p                                   | 3 |
| <i>circLY86-AS1</i> | miR-218-1-3p                                 | 2 |
| <i>circLY86-AS1</i> | miR-218-2-3p                                 | 2 |
| <i>circLY86-AS1</i> | miR-22-5p                                    | 1 |
| <i>circLY86-AS1</i> | miR-224-5p                                   | 2 |
| <i>circLY86-AS1</i> | miR-23-5p                                    | 2 |
| <i>circLY86-AS1</i> | miR-26-3p                                    | 4 |
| <i>circLY86-AS1</i> | miR-29a-5p                                   | 3 |
| <i>circLY86-AS1</i> | miR-30-3p                                    | 4 |
| <i>circLY86-AS1</i> | miR-302a-5p                                  | 3 |
| <i>circLY86-AS1</i> | miR-3065-5p                                  | 1 |
| <i>circLY86-AS1</i> | miR-3074-3p                                  | 3 |
| <i>circLY86-AS1</i> | miR-30b-3p/1273h-5p/3689-3p/6779-5p/6780a-5p |   |
| <i>circLY86-AS1</i> | miR-30c-3p/6788-5p                           | 1 |
| <i>circLY86-AS1</i> | miR-31-5p                                    | 4 |
| <i>circLY86-AS1</i> | miR-3117-3p                                  | 1 |
| <i>circLY86-AS1</i> | miR-3119                                     | 2 |
| <i>circLY86-AS1</i> | miR-3121-5p                                  | 3 |
| <i>circLY86-AS1</i> | miR-3127-5p                                  | 2 |
| <i>circLY86-AS1</i> | miR-3130-3p                                  | 2 |
| <i>circLY86-AS1</i> | miR-3133                                     | 3 |
| <i>circLY86-AS1</i> | miR-3135a                                    | 1 |
| <i>circLY86-AS1</i> | miR-3135b                                    | 3 |
| <i>circLY86-AS1</i> | miR-3136-3p/7155-3p                          | 2 |
| <i>circLY86-AS1</i> | miR-3138                                     | 1 |
| <i>circLY86-AS1</i> | miR-3140-3p                                  | 2 |
| <i>circLY86-AS1</i> | miR-3140-5p                                  | 1 |
| <i>circLY86-AS1</i> | miR-3145-3p                                  | 3 |
| <i>circLY86-AS1</i> | miR-3146                                     | 1 |
| <i>circLY86-AS1</i> | miR-3156-5p                                  | 2 |

|                     |                           |   |
|---------------------|---------------------------|---|
| <i>circLY86-AS1</i> | miR-3163                  | 2 |
| <i>circLY86-AS1</i> | miR-3165                  | 2 |
| <i>circLY86-AS1</i> | miR-3168                  | 1 |
| <i>circLY86-AS1</i> | miR-3173-3p/6891-5p       | 1 |
| <i>circLY86-AS1</i> | miR-3177-5p               | 1 |
| <i>circLY86-AS1</i> | miR-3180-5p               | 2 |
| <i>circLY86-AS1</i> | miR-3182                  | 1 |
| <i>circLY86-AS1</i> | miR-3185                  | 2 |
| <i>circLY86-AS1</i> | miR-3192-5p               | 2 |
| <i>circLY86-AS1</i> | miR-3201/4791             | 1 |
| <i>circLY86-AS1</i> | miR-323-3p                | 2 |
| <i>circLY86-AS1</i> | miR-323a-5p               | 3 |
| <i>circLY86-AS1</i> | miR-323b-5p/410-5p/494-5p | 1 |
| <i>circLY86-AS1</i> | miR-329-5p                | 1 |
| <i>circLY86-AS1</i> | miR-331-5p                | 1 |
| <i>circLY86-AS1</i> | miR-335-3p                | 3 |
| <i>circLY86-AS1</i> | miR-340-5p                | 2 |
| <i>circLY86-AS1</i> | miR-345-3p                | 1 |
| <i>circLY86-AS1</i> | miR-345-5p                | 2 |
| <i>circLY86-AS1</i> | miR-34a-3p                | 2 |
| <i>circLY86-AS1</i> | miR-34b-3p                | 3 |
| <i>circLY86-AS1</i> | miR-34c-3p                | 3 |
| <i>circLY86-AS1</i> | miR-3529-3p               | 2 |
| <i>circLY86-AS1</i> | miR-3591-5p               | 1 |
| <i>circLY86-AS1</i> | miR-3607-3p               | 1 |
| <i>circLY86-AS1</i> | miR-361-5p                | 2 |
| <i>circLY86-AS1</i> | miR-3611                  | 2 |
| <i>circLY86-AS1</i> | miR-3613-3p               | 1 |
| <i>circLY86-AS1</i> | miR-3613-5p               | 1 |
| <i>circLY86-AS1</i> | miR-3614-3p               | 3 |
| <i>circLY86-AS1</i> | miR-3616-3p               | 1 |
| <i>circLY86-AS1</i> | miR-3617-3p               | 2 |
| <i>circLY86-AS1</i> | miR-3618                  | 1 |
| <i>circLY86-AS1</i> | miR-362-5p/500b-5p        | 1 |
| <i>circLY86-AS1</i> | miR-3620-3p               | 2 |
| <i>circLY86-AS1</i> | miR-3622b-5p              | 1 |
| <i>circLY86-AS1</i> | miR-363-5p/6745           | 2 |
| <i>circLY86-AS1</i> | miR-3646                  | 1 |

|                     |                           |   |
|---------------------|---------------------------|---|
| <i>circLY86-AS1</i> | miR-3650                  | 1 |
| <i>circLY86-AS1</i> | miR-3654                  | 2 |
| <i>circLY86-AS1</i> | miR-3660/4526             | 3 |
| <i>circLY86-AS1</i> | miR-367-5p                | 2 |
| <i>circLY86-AS1</i> | miR-3671                  | 2 |
| <i>circLY86-AS1</i> | miR-3691-3p               | 2 |
| <i>circLY86-AS1</i> | miR-3691-5p               | 1 |
| <i>circLY86-AS1</i> | miR-3692-5p               | 2 |
| <i>circLY86-AS1</i> | miR-371-5p                | 2 |
| <i>circLY86-AS1</i> | miR-371b-5p/373-5p/616-5p | 2 |
| <i>circLY86-AS1</i> | miR-372-5p                | 2 |
| <i>circLY86-AS1</i> | miR-376b-5p/376c-5p       | 1 |
| <i>circLY86-AS1</i> | miR-377-5p/6086           | 1 |
| <i>circLY86-AS1</i> | miR-378-3p                | 1 |
| <i>circLY86-AS1</i> | miR-382-5p                | 1 |
| <i>circLY86-AS1</i> | miR-383-5p.2              | 1 |
| <i>circLY86-AS1</i> | miR-3918                  | 2 |
| <i>circLY86-AS1</i> | miR-3922-5p               | 4 |
| <i>circLY86-AS1</i> | miR-3927-5p               | 1 |
| <i>circLY86-AS1</i> | miR-3935                  | 2 |
| <i>circLY86-AS1</i> | miR-3936                  | 1 |
| <i>circLY86-AS1</i> | miR-3942-3p               | 3 |
| <i>circLY86-AS1</i> | miR-3945                  | 1 |
| <i>circLY86-AS1</i> | miR-410-3p                | 2 |
| <i>circLY86-AS1</i> | miR-411-5p.1              | 1 |
| <i>circLY86-AS1</i> | miR-411-5p.2              | 1 |
| <i>circLY86-AS1</i> | miR-421                   | 1 |
| <i>circLY86-AS1</i> | miR-4253/6862-5p          | 1 |
| <i>circLY86-AS1</i> | miR-4255                  | 2 |
| <i>circLY86-AS1</i> | miR-4256                  | 3 |
| <i>circLY86-AS1</i> | miR-4263                  | 4 |
| <i>circLY86-AS1</i> | miR-4264                  | 2 |
| <i>circLY86-AS1</i> | miR-4267                  | 3 |
| <i>circLY86-AS1</i> | miR-4270/4441/6754-5p     | 1 |
| <i>circLY86-AS1</i> | miR-4272                  | 2 |
| <i>circLY86-AS1</i> | miR-4276                  | 3 |
| <i>circLY86-AS1</i> | miR-4278                  | 1 |
| <i>circLY86-AS1</i> | miR-4280                  | 1 |

|                     |                                              |   |
|---------------------|----------------------------------------------|---|
| <i>circLY86-AS1</i> | miR-4297/5581-5p                             | 2 |
| <i>circLY86-AS1</i> | miR-4302                                     | 2 |
| <i>circLY86-AS1</i> | miR-4307                                     | 2 |
| <i>circLY86-AS1</i> | miR-4311                                     | 1 |
| <i>circLY86-AS1</i> | miR-4314                                     | 1 |
| <i>circLY86-AS1</i> | miR-4317                                     | 2 |
| <i>circLY86-AS1</i> | miR-4320                                     | 2 |
| <i>circLY86-AS1</i> | miR-4325                                     | 1 |
| <i>circLY86-AS1</i> | miR-4330                                     | 1 |
| <i>circLY86-AS1</i> | miR-4423-5p                                  | 1 |
| <i>circLY86-AS1</i> | miR-4426/4647/4662b                          | 3 |
| <i>circLY86-AS1</i> | miR-4428                                     | 1 |
| <i>circLY86-AS1</i> | miR-4436b-3p/4632-5p/6735-5p/6879-5p/7843-5p | 7 |
| <i>circLY86-AS1</i> | miR-4443                                     | 3 |
| <i>circLY86-AS1</i> | miR-4461                                     | 1 |
| <i>circLY86-AS1</i> | miR-4462                                     | 1 |
| <i>circLY86-AS1</i> | miR-4473                                     | 1 |
| <i>circLY86-AS1</i> | miR-4475                                     | 2 |
| <i>circLY86-AS1</i> | miR-4476/6876-5p                             | 4 |
| <i>circLY86-AS1</i> | miR-4477b                                    | 2 |
| <i>circLY86-AS1</i> | miR-4493                                     | 2 |
| <i>circLY86-AS1</i> | miR-4496                                     | 2 |
| <i>circLY86-AS1</i> | miR-449b-3p                                  | 1 |
| <i>circLY86-AS1</i> | miR-449c-3p                                  | 1 |
| <i>circLY86-AS1</i> | miR-4501                                     | 1 |
| <i>circLY86-AS1</i> | miR-4509                                     | 3 |
| <i>circLY86-AS1</i> | miR-4520-3p                                  | 1 |
| <i>circLY86-AS1</i> | miR-4524a-3p                                 | 2 |
| <i>circLY86-AS1</i> | miR-4529-5p                                  | 1 |
| <i>circLY86-AS1</i> | miR-4539                                     | 1 |
| <i>circLY86-AS1</i> | miR-4635                                     | 3 |
| <i>circLY86-AS1</i> | miR-4638-3p                                  | 1 |
| <i>circLY86-AS1</i> | miR-4640-5p                                  | 1 |
| <i>circLY86-AS1</i> | miR-4641                                     | 2 |
| <i>circLY86-AS1</i> | miR-4645-3p                                  | 1 |
| <i>circLY86-AS1</i> | miR-4661-3p                                  | 1 |
| <i>circLY86-AS1</i> | miR-4662a-3p                                 | 2 |
| <i>circLY86-AS1</i> | miR-4668-3p                                  | 2 |

|                     |                     |   |
|---------------------|---------------------|---|
| <i>circLY86-AS1</i> | miR-4670-3p         | 1 |
| <i>circLY86-AS1</i> | miR-4671-3p         | 1 |
| <i>circLY86-AS1</i> | miR-4683            | 2 |
| <i>circLY86-AS1</i> | miR-4685-5p/6837-5p | 1 |
| <i>circLY86-AS1</i> | miR-4688/6743-5p    | 1 |
| <i>circLY86-AS1</i> | miR-4694-5p         | 1 |
| <i>circLY86-AS1</i> | miR-4699-5p         | 5 |
| <i>circLY86-AS1</i> | miR-4700-3p         | 1 |
| <i>circLY86-AS1</i> | miR-4708-3p         | 5 |
| <i>circLY86-AS1</i> | miR-4708-5p         | 2 |
| <i>circLY86-AS1</i> | miR-4709-3p         | 4 |
| <i>circLY86-AS1</i> | miR-4711-3p         | 2 |
| <i>circLY86-AS1</i> | miR-4712-3p         | 1 |
| <i>circLY86-AS1</i> | miR-4721            | 1 |
| <i>circLY86-AS1</i> | miR-4739            | 2 |
| <i>circLY86-AS1</i> | miR-4744            | 3 |
| <i>circLY86-AS1</i> | miR-4747-3p         | 2 |
| <i>circLY86-AS1</i> | miR-4753-5p         | 3 |
| <i>circLY86-AS1</i> | miR-4760-3p         | 2 |
| <i>circLY86-AS1</i> | miR-4760-5p/8061    | 2 |
| <i>circLY86-AS1</i> | miR-4761-3p         | 3 |
| <i>circLY86-AS1</i> | miR-4762-3p         | 2 |
| <i>circLY86-AS1</i> | miR-4775            | 2 |
| <i>circLY86-AS1</i> | miR-4778-3p         | 1 |
| <i>circLY86-AS1</i> | miR-4778-5p         | 2 |
| <i>circLY86-AS1</i> | miR-4786-5p         | 1 |
| <i>circLY86-AS1</i> | miR-4789-5p         | 2 |
| <i>circLY86-AS1</i> | miR-4793-3p         | 2 |
| <i>circLY86-AS1</i> | miR-4797-3p         | 2 |
| <i>circLY86-AS1</i> | miR-4799-5p         | 2 |
| <i>circLY86-AS1</i> | miR-4800-5p         | 1 |
| <i>circLY86-AS1</i> | miR-483-3p.1        | 2 |
| <i>circLY86-AS1</i> | miR-488-5p          | 4 |
| <i>circLY86-AS1</i> | miR-490-5p          | 1 |
| <i>circLY86-AS1</i> | miR-491-3p          | 1 |
| <i>circLY86-AS1</i> | miR-495-5p          | 1 |
| <i>circLY86-AS1</i> | miR-5002-5p         | 3 |
| <i>circLY86-AS1</i> | miR-5003-3p         | 3 |

|                     |                                               |   |
|---------------------|-----------------------------------------------|---|
| <i>circLY86-AS1</i> | miR-5004-3p                                   | 1 |
| <i>circLY86-AS1</i> | miR-5009-5p/8058                              | 1 |
| <i>circLY86-AS1</i> | miR-501-5p                                    | 1 |
| <i>circLY86-AS1</i> | miR-5011-5p                                   | 2 |
| <i>circLY86-AS1</i> | miR-504-3p                                    | 3 |
| <i>circLY86-AS1</i> | miR-504-5p.1                                  | 1 |
| <i>circLY86-AS1</i> | miR-505-3p.2                                  | 1 |
| <i>circLY86-AS1</i> | miR-506-5p                                    | 1 |
| <i>circLY86-AS1</i> | miR-5089-3p                                   | 3 |
| <i>circLY86-AS1</i> | miR-5093                                      | 1 |
| <i>circLY86-AS1</i> | miR-5095/7151-3p                              | 1 |
| <i>circLY86-AS1</i> | miR-5100                                      | 1 |
| <i>circLY86-AS1</i> | miR-512-5p                                    | 1 |
| <i>circLY86-AS1</i> | miR-513a-3p/513c-3p/3606-3p                   | 2 |
| <i>circLY86-AS1</i> | miR-513b-3p                                   | 3 |
| <i>circLY86-AS1</i> | miR-5186                                      | 2 |
| <i>circLY86-AS1</i> | miR-5197-3p                                   | 2 |
| <i>circLY86-AS1</i> | miR-525-5p                                    | 3 |
| <i>circLY86-AS1</i> | miR-526b-5p                                   | 3 |
| <i>circLY86-AS1</i> | miR-543                                       | 2 |
| <i>circLY86-AS1</i> | miR-544a                                      | 2 |
| <i>circLY86-AS1</i> | miR-545-3p                                    | 1 |
| <i>circLY86-AS1</i> | miR-548ah-5p/3609                             | 1 |
| <i>circLY86-AS1</i> | miR-548ao-5p/548ax                            | 3 |
| <i>circLY86-AS1</i> | miR-548az-3p/548ar-3p/548a-3p/548e-3p/548f-3p | 1 |
| <i>circLY86-AS1</i> | miR-548g-3p                                   | 1 |
| <i>circLY86-AS1</i> | miR-548m                                      | 2 |
| <i>circLY86-AS1</i> | miR-549a                                      | 2 |
| <i>circLY86-AS1</i> | miR-550a-3-5p/550a-5p/1271-3p                 | 1 |
| <i>circLY86-AS1</i> | miR-5580-3p                                   | 2 |
| <i>circLY86-AS1</i> | miR-5582-3p                                   | 1 |
| <i>circLY86-AS1</i> | miR-5584-3p                                   | 1 |
| <i>circLY86-AS1</i> | miR-5585-3p                                   | 1 |
| <i>circLY86-AS1</i> | miR-5585-5p                                   | 3 |
| <i>circLY86-AS1</i> | miR-5681a                                     | 2 |
| <i>circLY86-AS1</i> | miR-5690                                      | 3 |
| <i>circLY86-AS1</i> | miR-5694                                      | 1 |
| <i>circLY86-AS1</i> | miR-5701                                      | 1 |

|                     |                    |   |
|---------------------|--------------------|---|
| <i>circLY86-AS1</i> | miR-573/3616-5p    | 1 |
| <i>circLY86-AS1</i> | miR-576-3p         | 2 |
| <i>circLY86-AS1</i> | miR-576-5p         | 4 |
| <i>circLY86-AS1</i> | miR-578            | 2 |
| <i>circLY86-AS1</i> | miR-580-5p         | 2 |
| <i>circLY86-AS1</i> | miR-582-3p         | 3 |
| <i>circLY86-AS1</i> | miR-583            | 1 |
| <i>circLY86-AS1</i> | miR-584-3p         | 2 |
| <i>circLY86-AS1</i> | miR-595            | 1 |
| <i>circLY86-AS1</i> | miR-597-5p         | 2 |
| <i>circLY86-AS1</i> | miR-605-3p         | 2 |
| <i>circLY86-AS1</i> | miR-605-5p         | 2 |
| <i>circLY86-AS1</i> | miR-607            | 1 |
| <i>circLY86-AS1</i> | miR-6071           | 2 |
| <i>circLY86-AS1</i> | miR-6077           | 3 |
| <i>circLY86-AS1</i> | miR-6078           | 2 |
| <i>circLY86-AS1</i> | miR-6080           | 1 |
| <i>circLY86-AS1</i> | miR-6085/6813-5p   | 1 |
| <i>circLY86-AS1</i> | miR-6126           | 1 |
| <i>circLY86-AS1</i> | miR-6128           | 2 |
| <i>circLY86-AS1</i> | miR-616-3p         | 2 |
| <i>circLY86-AS1</i> | miR-619-5p/6506-5p | 2 |
| <i>circLY86-AS1</i> | miR-624-3p         | 2 |
| <i>circLY86-AS1</i> | miR-624-5p         | 2 |
| <i>circLY86-AS1</i> | miR-628-5p         | 2 |
| <i>circLY86-AS1</i> | miR-631/3661       | 1 |
| <i>circLY86-AS1</i> | miR-632/4288       | 1 |
| <i>circLY86-AS1</i> | miR-635/6774-5p    | 1 |
| <i>circLY86-AS1</i> | miR-639            | 2 |
| <i>circLY86-AS1</i> | miR-642a-5p        | 2 |
| <i>circLY86-AS1</i> | miR-6501-5p        | 1 |
| <i>circLY86-AS1</i> | miR-6502-3p        | 1 |
| <i>circLY86-AS1</i> | miR-6505-5p        | 3 |
| <i>circLY86-AS1</i> | miR-6508-3p        | 1 |
| <i>circLY86-AS1</i> | miR-651-3p         | 6 |
| <i>circLY86-AS1</i> | miR-6515-5p        | 3 |
| <i>circLY86-AS1</i> | miR-655-5p         | 1 |
| <i>circLY86-AS1</i> | miR-656-5p         | 3 |

|                     |                     |   |
|---------------------|---------------------|---|
| <i>circLY86-AS1</i> | miR-659-3p          | 4 |
| <i>circLY86-AS1</i> | miR-664a-3p         | 2 |
| <i>circLY86-AS1</i> | miR-668-5p          | 1 |
| <i>circLY86-AS1</i> | miR-6719-3p         | 3 |
| <i>circLY86-AS1</i> | miR-6720-3p         | 1 |
| <i>circLY86-AS1</i> | miR-6720-5p         | 3 |
| <i>circLY86-AS1</i> | miR-6730-3p         | 3 |
| <i>circLY86-AS1</i> | miR-6730-5p         | 2 |
| <i>circLY86-AS1</i> | miR-6731-3p         | 4 |
| <i>circLY86-AS1</i> | miR-6731-5p/8085    | 3 |
| <i>circLY86-AS1</i> | miR-6733-3p         | 2 |
| <i>circLY86-AS1</i> | miR-6736-3p         | 2 |
| <i>circLY86-AS1</i> | miR-6738-3p         | 2 |
| <i>circLY86-AS1</i> | miR-6741-5p         | 2 |
| <i>circLY86-AS1</i> | miR-6752-3p         | 1 |
| <i>circLY86-AS1</i> | miR-6753-5p         | 2 |
| <i>circLY86-AS1</i> | miR-6756-5p/6766-5p | 2 |
| <i>circLY86-AS1</i> | miR-676-5p          | 1 |
| <i>circLY86-AS1</i> | miR-6760-5p         | 2 |
| <i>circLY86-AS1</i> | miR-6762-5p/6845-5p | 1 |
| <i>circLY86-AS1</i> | miR-6782-5p         | 1 |
| <i>circLY86-AS1</i> | miR-6789-5p         | 1 |
| <i>circLY86-AS1</i> | miR-6800-5p         | 1 |
| <i>circLY86-AS1</i> | miR-6802-5p         | 1 |
| <i>circLY86-AS1</i> | miR-6809-5p         | 4 |
| <i>circLY86-AS1</i> | miR-6811-3p         | 3 |
| <i>circLY86-AS1</i> | miR-6815-5p/6865-5p | 1 |
| <i>circLY86-AS1</i> | miR-6824-5p         | 1 |
| <i>circLY86-AS1</i> | miR-6828-3p         | 2 |
| <i>circLY86-AS1</i> | miR-6830-5p         | 3 |
| <i>circLY86-AS1</i> | miR-6854-5p         | 3 |
| <i>circLY86-AS1</i> | miR-6856-3p         | 2 |
| <i>circLY86-AS1</i> | miR-6864-5p         | 1 |
| <i>circLY86-AS1</i> | miR-6867-5p         | 1 |
| <i>circLY86-AS1</i> | miR-6878-5p         | 3 |
| <i>circLY86-AS1</i> | miR-6880-5p         | 2 |
| <i>circLY86-AS1</i> | miR-6885-3p         | 2 |
| <i>circLY86-AS1</i> | miR-6888-5p         | 2 |



|                     |                     |   |
|---------------------|---------------------|---|
| <i>circLY86-AS1</i> | miR-7-3p            | 2 |
| <i>circLY86-AS1</i> | miR-7-5p            | 3 |
| <i>circLY86-AS1</i> | miR-7113-5p         | 1 |
| <i>circLY86-AS1</i> | miR-7151-5p         | 2 |
| <i>circLY86-AS1</i> | miR-7158-3p         | 2 |
| <i>circLY86-AS1</i> | miR-7158-5p         | 5 |
| <i>circLY86-AS1</i> | miR-7159-5p         | 1 |
| <i>circLY86-AS1</i> | miR-759             | 3 |
| <i>circLY86-AS1</i> | miR-769-5p          | 1 |
| <i>circLY86-AS1</i> | miR-7703            | 1 |
| <i>circLY86-AS1</i> | miR-7844-5p         | 1 |
| <i>circLY86-AS1</i> | miR-7848-3p         | 1 |
| <i>circLY86-AS1</i> | miR-7850-5p         | 3 |
| <i>circLY86-AS1</i> | miR-7856-5p         | 2 |
| <i>circLY86-AS1</i> | miR-8055            | 2 |
| <i>circLY86-AS1</i> | miR-8056            | 1 |
| <i>circLY86-AS1</i> | miR-8069            | 1 |
| <i>circLY86-AS1</i> | miR-8071            | 2 |
| <i>circLY86-AS1</i> | miR-8081            | 1 |
| <i>circLY86-AS1</i> | miR-8084            | 2 |
| <i>circLY86-AS1</i> | miR-8086            | 1 |
| <i>circLY86-AS1</i> | miR-873-5p.1        | 1 |
| <i>circLY86-AS1</i> | miR-875-3p          | 1 |
| <i>circLY86-AS1</i> | miR-876-3p          | 3 |
| <i>circLY86-AS1</i> | miR-890             | 2 |
| <i>circLY86-AS1</i> | miR-892-5p          | 1 |
| <i>circLY86-AS1</i> | miR-892b            | 1 |
| <i>circLY86-AS1</i> | miR-9-5p            | 2 |
| <i>circLY86-AS1</i> | miR-93-3p           | 2 |
| <i>circLY86-AS1</i> | miR-934             | 1 |
| <i>circLY86-AS1</i> | miR-936             | 1 |
| <i>circLY86-AS1</i> | miR-100-3p          | 2 |
| <i>circLY86-AS1</i> | miR-1199-5p/6751-3p | 1 |
| <i>circLY86-AS1</i> | miR-122-5p          | 1 |
| <i>circLY86-AS1</i> | miR-1236-5p         | 1 |
| <i>circLY86-AS1</i> | miR-124-3p.1        | 2 |
| <i>circLY86-AS1</i> | miR-127-5p          | 1 |
| <i>circLY86-AS1</i> | miR-129-5p          | 1 |

|                     |                       |   |
|---------------------|-----------------------|---|
| <i>circLY86-AS1</i> | miR-1290              | 1 |
| <i>circLY86-AS1</i> | miR-147a              | 1 |
| <i>circLY86-AS1</i> | miR-1911-5p           | 1 |
| <i>circLY86-AS1</i> | miR-217               | 3 |
| <i>circLY86-AS1</i> | miR-219a-1-3p         | 2 |
| <i>circLY86-AS1</i> | miR-2276-3p           | 1 |
| <i>circLY86-AS1</i> | miR-29-3p             | 1 |
| <i>circLY86-AS1</i> | miR-301a-5p/301b-5p   | 2 |
| <i>circLY86-AS1</i> | miR-3127-3p/6756-3p   | 1 |
| <i>circLY86-AS1</i> | miR-3136-5p/4439      | 1 |
| <i>circLY86-AS1</i> | miR-3159              | 2 |
| <i>circLY86-AS1</i> | miR-3191-5p           | 1 |
| <i>circLY86-AS1</i> | miR-3664-5p           | 1 |
| <i>circLY86-AS1</i> | miR-3714              | 2 |
| <i>circLY86-AS1</i> | miR-380-5p/563        | 1 |
| <i>circLY86-AS1</i> | miR-3910              | 2 |
| <i>circLY86-AS1</i> | miR-3911              | 1 |
| <i>circLY86-AS1</i> | miR-3921/4653-5p      | 2 |
| <i>circLY86-AS1</i> | miR-3941              | 3 |
| <i>circLY86-AS1</i> | miR-4274              | 1 |
| <i>circLY86-AS1</i> | miR-4277              | 1 |
| <i>circLY86-AS1</i> | miR-4303              | 1 |
| <i>circLY86-AS1</i> | miR-4433a-3p          | 1 |
| <i>circLY86-AS1</i> | miR-4433b-3p          | 1 |
| <i>circLY86-AS1</i> | miR-4436b-5p          | 1 |
| <i>circLY86-AS1</i> | miR-4459              | 1 |
| <i>circLY86-AS1</i> | miR-4468              | 1 |
| <i>circLY86-AS1</i> | miR-4519              | 1 |
| <i>circLY86-AS1</i> | miR-4639-3p           | 1 |
| <i>circLY86-AS1</i> | miR-4643              | 1 |
| <i>circLY86-AS1</i> | miR-4653-3p           | 1 |
| <i>circLY86-AS1</i> | miR-4659a-5p/4659b-5p | 2 |
| <i>circLY86-AS1</i> | miR-466               | 1 |
| <i>circLY86-AS1</i> | miR-4672              | 3 |
| <i>circLY86-AS1</i> | miR-4682              | 1 |
| <i>circLY86-AS1</i> | miR-4714-5p           | 1 |
| <i>circLY86-AS1</i> | miR-4765              | 1 |
| <i>circLY86-AS1</i> | miR-4768-3p           | 1 |

|                     |                          |   |
|---------------------|--------------------------|---|
| <i>circLY86-AS1</i> | miR-4768-5p/6833-3p      | 1 |
| <i>circLY86-AS1</i> | miR-4769-3p/6817-5p      | 2 |
| <i>circLY86-AS1</i> | miR-4772-3p              | 1 |
| <i>circLY86-AS1</i> | miR-4786-3p              | 1 |
| <i>circLY86-AS1</i> | miR-4789-3p              | 1 |
| <i>circLY86-AS1</i> | miR-4797-5p              | 3 |
| <i>circLY86-AS1</i> | miR-498                  | 1 |
| <i>circLY86-AS1</i> | miR-5000-5p              | 1 |
| <i>circLY86-AS1</i> | miR-5002-3p              | 2 |
| <i>circLY86-AS1</i> | miR-5007-5p              | 1 |
| <i>circLY86-AS1</i> | miR-509-3-5p/509-5p/4418 | 3 |
| <i>circLY86-AS1</i> | miR-514a-5p              | 1 |
| <i>circLY86-AS1</i> | miR-5195-5p              | 1 |
| <i>circLY86-AS1</i> | miR-5586-5p              | 1 |
| <i>circLY86-AS1</i> | miR-5590-5p              | 2 |
| <i>circLY86-AS1</i> | miR-561-5p               | 1 |
| <i>circLY86-AS1</i> | miR-5689                 | 1 |
| <i>circLY86-AS1</i> | miR-571                  | 2 |
| <i>circLY86-AS1</i> | miR-592                  | 1 |
| <i>circLY86-AS1</i> | miR-599                  | 1 |
| <i>circLY86-AS1</i> | miR-641/3617-5p          | 1 |
| <i>circLY86-AS1</i> | miR-644a                 | 1 |
| <i>circLY86-AS1</i> | miR-6509-3p              | 1 |
| <i>circLY86-AS1</i> | miR-6716-3p              | 1 |
| <i>circLY86-AS1</i> | miR-6746-5p              | 1 |
| <i>circLY86-AS1</i> | miR-6777-3p              | 1 |
| <i>circLY86-AS1</i> | miR-6796-3p              | 1 |
| <i>circLY86-AS1</i> | miR-6809-3p              | 1 |
| <i>circLY86-AS1</i> | miR-6818-5p              | 1 |
| <i>circLY86-AS1</i> | miR-6832-3p              | 1 |
| <i>circLY86-AS1</i> | miR-6869-5p              | 1 |
| <i>circLY86-AS1</i> | miR-6871-3p              | 1 |
| <i>circLY86-AS1</i> | miR-7109-3p              | 1 |
| <i>circLY86-AS1</i> | miR-758-5p               | 1 |
| <i>circLY86-AS1</i> | miR-7843-3p              | 1 |
| <i>circLY86-AS1</i> | miR-876-5p               | 1 |
| <i>circLY86-AS1</i> | miR-942-5p               | 1 |
| <i>circLY86-AS1</i> | miR-943                  | 1 |

|                     |                                      |   |
|---------------------|--------------------------------------|---|
| <i>circLY86-AS1</i> | miR-99-3p                            | 1 |
| <i>circLY86-AS1</i> | miR-101-5p                           | 2 |
| <i>circLY86-AS1</i> | miR-1184                             | 1 |
| <i>circLY86-AS1</i> | miR-1205                             | 1 |
| <i>circLY86-AS1</i> | miR-1207-3p                          | 3 |
| <i>circLY86-AS1</i> | miR-1224-5p                          | 1 |
| <i>circLY86-AS1</i> | miR-1226-3p                          | 1 |
| <i>circLY86-AS1</i> | miR-1227-3p                          | 1 |
| <i>circLY86-AS1</i> | miR-1245a/8079                       | 1 |
| <i>circLY86-AS1</i> | miR-1247-3p                          | 3 |
| <i>circLY86-AS1</i> | miR-1251-5p                          | 1 |
| <i>circLY86-AS1</i> | miR-1252-5p                          | 1 |
| <i>circLY86-AS1</i> | miR-1253                             | 1 |
| <i>circLY86-AS1</i> | miR-1265                             | 1 |
| <i>circLY86-AS1</i> | miR-1273g-3p                         | 1 |
| <i>circLY86-AS1</i> | miR-128-3p                           | 1 |
| <i>circLY86-AS1</i> | miR-1291/6775-3p                     | 1 |
| <i>circLY86-AS1</i> | miR-1292-5p                          | 3 |
| <i>circLY86-AS1</i> | miR-1303                             | 1 |
| <i>circLY86-AS1</i> | miR-1305                             | 1 |
| <i>circLY86-AS1</i> | miR-132-3p/212-3p                    | 1 |
| <i>circLY86-AS1</i> | miR-135a-3p                          | 1 |
| <i>circLY86-AS1</i> | miR-136-3p                           | 1 |
| <i>circLY86-AS1</i> | miR-140-3p.1                         | 1 |
| <i>circLY86-AS1</i> | miR-143-5p                           | 1 |
| <i>circLY86-AS1</i> | miR-146a-3p                          | 1 |
| <i>circLY86-AS1</i> | miR-15-5p/16-5p/195-5p/424-5p/497-5p | 2 |
| <i>circLY86-AS1</i> | miR-150-5p                           | 1 |
| <i>circLY86-AS1</i> | miR-153-3p                           | 1 |
| <i>circLY86-AS1</i> | miR-17-3p                            | 1 |
| <i>circLY86-AS1</i> | miR-182-5p                           | 1 |
| <i>circLY86-AS1</i> | miR-1827                             | 2 |
| <i>circLY86-AS1</i> | miR-183-5p.1                         | 1 |
| <i>circLY86-AS1</i> | miR-18b-3p                           | 1 |
| <i>circLY86-AS1</i> | miR-1910-3p/6511a-5p                 | 1 |
| <i>circLY86-AS1</i> | miR-1910-5p                          | 1 |
| <i>circLY86-AS1</i> | miR-1911-3p                          | 1 |
| <i>circLY86-AS1</i> | miR-192-3p                           | 1 |

|                     |                          |   |
|---------------------|--------------------------|---|
| <i>circLY86-AS1</i> | miR-193-3p               | 1 |
| <i>circLY86-AS1</i> | miR-194-3p               | 1 |
| <i>circLY86-AS1</i> | miR-197-5p/3132          | 1 |
| <i>circLY86-AS1</i> | miR-1972                 | 1 |
| <i>circLY86-AS1</i> | miR-202-5p               | 1 |
| <i>circLY86-AS1</i> | miR-205-5p               | 1 |
| <i>circLY86-AS1</i> | miR-2110                 | 1 |
| <i>circLY86-AS1</i> | miR-2114-3p              | 1 |
| <i>circLY86-AS1</i> | miR-2116-3p              | 1 |
| <i>circLY86-AS1</i> | miR-214-3p/3619-5p       | 2 |
| <i>circLY86-AS1</i> | miR-219b-5p              | 1 |
| <i>circLY86-AS1</i> | miR-22-3p                | 1 |
| <i>circLY86-AS1</i> | miR-23-3p                | 1 |
| <i>circLY86-AS1</i> | miR-2392                 | 1 |
| <i>circLY86-AS1</i> | miR-2467-3p              | 1 |
| <i>circLY86-AS1</i> | miR-296-5p               | 1 |
| <i>circLY86-AS1</i> | miR-297                  | 1 |
| <i>circLY86-AS1</i> | miR-3115                 | 1 |
| <i>circLY86-AS1</i> | miR-3123                 | 1 |
| <i>circLY86-AS1</i> | miR-3125/3916/6859-5p    | 2 |
| <i>circLY86-AS1</i> | miR-3126-5p              | 1 |
| <i>circLY86-AS1</i> | miR-3128                 | 1 |
| <i>circLY86-AS1</i> | miR-3134                 | 1 |
| <i>circLY86-AS1</i> | miR-3144-5p              | 1 |
| <i>circLY86-AS1</i> | miR-3148                 | 2 |
| <i>circLY86-AS1</i> | miR-3150a-3p             | 1 |
| <i>circLY86-AS1</i> | miR-3150b-3p             | 3 |
| <i>circLY86-AS1</i> | miR-3153/6733-5p/6739-5p | 1 |
| <i>circLY86-AS1</i> | miR-3154                 | 1 |
| <i>circLY86-AS1</i> | miR-3158-5p              | 1 |
| <i>circLY86-AS1</i> | miR-3162-5p              | 1 |
| <i>circLY86-AS1</i> | miR-3187-3p              | 2 |
| <i>circLY86-AS1</i> | miR-3190-3p              | 1 |
| <i>circLY86-AS1</i> | miR-3191-3p              | 1 |
| <i>circLY86-AS1</i> | miR-32-3p                | 1 |
| <i>circLY86-AS1</i> | miR-3200-3p              | 1 |
| <i>circLY86-AS1</i> | miR-3202                 | 1 |
| <i>circLY86-AS1</i> | miR-320e                 | 1 |

|                     |                                    |   |
|---------------------|------------------------------------|---|
| <i>circLY86-AS1</i> | miR-329-3p/362-3p                  | 1 |
| <i>circLY86-AS1</i> | miR-338-3p                         | 2 |
| <i>circLY86-AS1</i> | miR-34-5p/449-5p                   | 1 |
| <i>circLY86-AS1</i> | miR-34b-5p/449c-5p                 | 1 |
| <i>circLY86-AS1</i> | miR-3612                           | 2 |
| <i>circLY86-AS1</i> | miR-3649                           | 1 |
| <i>circLY86-AS1</i> | miR-3680-3p                        | 1 |
| <i>circLY86-AS1</i> | miR-3681-5p                        | 1 |
| <i>circLY86-AS1</i> | miR-3685                           | 1 |
| <i>circLY86-AS1</i> | miR-3689a-5p/3689b-5p/3689e/3689f  | 1 |
| <i>circLY86-AS1</i> | miR-3692-3p                        | 1 |
| <i>circLY86-AS1</i> | miR-375                            | 1 |
| <i>circLY86-AS1</i> | miR-377-3p                         | 1 |
| <i>circLY86-AS1</i> | miR-378j/6839-5p                   | 1 |
| <i>circLY86-AS1</i> | miR-379-5p                         | 1 |
| <i>circLY86-AS1</i> | miR-384                            | 1 |
| <i>circLY86-AS1</i> | miR-3912-5p                        | 1 |
| <i>circLY86-AS1</i> | miR-3914                           | 1 |
| <i>circLY86-AS1</i> | miR-3915                           | 1 |
| <i>circLY86-AS1</i> | miR-3919                           | 2 |
| <i>circLY86-AS1</i> | miR-3924                           | 1 |
| <i>circLY86-AS1</i> | miR-3925-3p                        | 1 |
| <i>circLY86-AS1</i> | miR-3925-5p                        | 1 |
| <i>circLY86-AS1</i> | miR-3926                           | 1 |
| <i>circLY86-AS1</i> | miR-3928-3p                        | 1 |
| <i>circLY86-AS1</i> | miR-411-3p                         | 1 |
| <i>circLY86-AS1</i> | miR-4257                           | 1 |
| <i>circLY86-AS1</i> | miR-4260                           | 1 |
| <i>circLY86-AS1</i> | miR-4293                           | 1 |
| <i>circLY86-AS1</i> | miR-4301                           | 1 |
| <i>circLY86-AS1</i> | miR-432-3p                         | 1 |
| <i>circLY86-AS1</i> | miR-4324                           | 1 |
| <i>circLY86-AS1</i> | miR-4419a/4510/6127/6129/6130/6133 | 1 |
| <i>circLY86-AS1</i> | miR-4434/4516/5703                 | 1 |
| <i>circLY86-AS1</i> | miR-4435                           | 2 |
| <i>circLY86-AS1</i> | miR-4451                           | 1 |
| <i>circLY86-AS1</i> | miR-4463                           | 1 |
| <i>circLY86-AS1</i> | miR-4470                           | 1 |

|                     |                             |   |
|---------------------|-----------------------------|---|
| <i>circLY86-AS1</i> | miR-4471/8059               | 3 |
| <i>circLY86-AS1</i> | miR-4474-3p                 | 1 |
| <i>circLY86-AS1</i> | miR-4474-5p                 | 1 |
| <i>circLY86-AS1</i> | miR-448                     | 1 |
| <i>circLY86-AS1</i> | miR-4482-3p                 | 1 |
| <i>circLY86-AS1</i> | miR-4484                    | 1 |
| <i>circLY86-AS1</i> | miR-4499                    | 1 |
| <i>circLY86-AS1</i> | miR-450a-2-3p               | 1 |
| <i>circLY86-AS1</i> | miR-450b-5p                 | 1 |
| <i>circLY86-AS1</i> | miR-4524b-3p                | 1 |
| <i>circLY86-AS1</i> | miR-4530                    | 2 |
| <i>circLY86-AS1</i> | miR-4533                    | 1 |
| <i>circLY86-AS1</i> | miR-4534/8082               | 1 |
| <i>circLY86-AS1</i> | miR-455-3p.1                | 1 |
| <i>circLY86-AS1</i> | miR-455-3p.2                | 1 |
| <i>circLY86-AS1</i> | miR-4642                    | 1 |
| <i>circLY86-AS1</i> | miR-4645-5p/4673            | 1 |
| <i>circLY86-AS1</i> | miR-4649-3p                 | 1 |
| <i>circLY86-AS1</i> | miR-4650-3p                 | 1 |
| <i>circLY86-AS1</i> | miR-4650-5p                 | 1 |
| <i>circLY86-AS1</i> | miR-4652-3p                 | 1 |
| <i>circLY86-AS1</i> | miR-4652-5p                 | 1 |
| <i>circLY86-AS1</i> | miR-4660                    | 2 |
| <i>circLY86-AS1</i> | miR-4666a-5p                | 1 |
| <i>circLY86-AS1</i> | miR-4668-5p                 | 1 |
| <i>circLY86-AS1</i> | miR-4677-3p                 | 1 |
| <i>circLY86-AS1</i> | miR-4679                    | 1 |
| <i>circLY86-AS1</i> | miR-4689/6858-5p            | 1 |
| <i>circLY86-AS1</i> | miR-4695-5p                 | 2 |
| <i>circLY86-AS1</i> | miR-4699-3p                 | 1 |
| <i>circLY86-AS1</i> | miR-4711-5p                 | 1 |
| <i>circLY86-AS1</i> | miR-4720-5p/4799-3p/5588-5p | 1 |
| <i>circLY86-AS1</i> | miR-4722-3p/6727-3p         | 1 |
| <i>circLY86-AS1</i> | miR-4731-5p                 | 1 |
| <i>circLY86-AS1</i> | miR-4733-3p                 | 1 |
| <i>circLY86-AS1</i> | miR-4743-3p                 | 1 |
| <i>circLY86-AS1</i> | miR-4750-3p                 | 1 |
| <i>circLY86-AS1</i> | miR-4756-3p                 | 2 |

|                     |                      |   |
|---------------------|----------------------|---|
| <i>circLY86-AS1</i> | miR-4762-5p          | 1 |
| <i>circLY86-AS1</i> | miR-4764-5p          | 1 |
| <i>circLY86-AS1</i> | miR-4773             | 1 |
| <i>circLY86-AS1</i> | miR-4779             | 2 |
| <i>circLY86-AS1</i> | miR-4802-5p          | 1 |
| <i>circLY86-AS1</i> | miR-486-5p           | 1 |
| <i>circLY86-AS1</i> | miR-488-3p           | 1 |
| <i>circLY86-AS1</i> | miR-490-3p           | 1 |
| <i>circLY86-AS1</i> | miR-497-3p           | 1 |
| <i>circLY86-AS1</i> | miR-500a-3p          | 1 |
| <i>circLY86-AS1</i> | miR-503-5p           | 2 |
| <i>circLY86-AS1</i> | miR-507/557          | 1 |
| <i>circLY86-AS1</i> | miR-515-5p/519e-5p   | 1 |
| <i>circLY86-AS1</i> | miR-517-5p           | 1 |
| <i>circLY86-AS1</i> | miR-5190             | 1 |
| <i>circLY86-AS1</i> | miR-532-3p           | 1 |
| <i>circLY86-AS1</i> | miR-539-5p           | 1 |
| <i>circLY86-AS1</i> | miR-544b             | 1 |
| <i>circLY86-AS1</i> | miR-548an            | 1 |
| <i>circLY86-AS1</i> | miR-548au-3p         | 1 |
| <i>circLY86-AS1</i> | miR-548az-5p/548t-5p | 1 |
| <i>circLY86-AS1</i> | miR-548n             | 1 |
| <i>circLY86-AS1</i> | miR-548s             | 2 |
| <i>circLY86-AS1</i> | miR-551b-5p          | 1 |
| <i>circLY86-AS1</i> | miR-554              | 1 |
| <i>circLY86-AS1</i> | miR-5571-3p          | 1 |
| <i>circLY86-AS1</i> | miR-5572             | 1 |
| <i>circLY86-AS1</i> | miR-5584-5p          | 3 |
| <i>circLY86-AS1</i> | miR-5589-5p          | 1 |
| <i>circLY86-AS1</i> | miR-567              | 1 |
| <i>circLY86-AS1</i> | miR-5687             | 1 |
| <i>circLY86-AS1</i> | miR-5692a            | 1 |
| <i>circLY86-AS1</i> | miR-5693             | 1 |
| <i>circLY86-AS1</i> | miR-580-3p           | 1 |
| <i>circLY86-AS1</i> | miR-588              | 2 |
| <i>circLY86-AS1</i> | miR-590-3p           | 1 |
| <i>circLY86-AS1</i> | miR-596              | 1 |
| <i>circLY86-AS1</i> | miR-603              | 1 |



|                     |                     |   |
|---------------------|---------------------|---|
| <i>circLY86-AS1</i> | miR-6079            | 1 |
| <i>circLY86-AS1</i> | miR-6124            | 2 |
| <i>circLY86-AS1</i> | miR-614             | 2 |
| <i>circLY86-AS1</i> | miR-634             | 1 |
| <i>circLY86-AS1</i> | miR-646             | 2 |
| <i>circLY86-AS1</i> | miR-649             | 1 |
| <i>circLY86-AS1</i> | miR-6507-3p         | 1 |
| <i>circLY86-AS1</i> | miR-6508-5p/8067    | 1 |
| <i>circLY86-AS1</i> | miR-6514-5p         | 1 |
| <i>circLY86-AS1</i> | miR-663b            | 1 |
| <i>circLY86-AS1</i> | miR-6715a-3p        | 1 |
| <i>circLY86-AS1</i> | miR-6716-5p         | 1 |
| <i>circLY86-AS1</i> | miR-6724-5p/6773-5p | 1 |
| <i>circLY86-AS1</i> | miR-6735-3p         | 1 |
| <i>circLY86-AS1</i> | miR-6747-3p         | 1 |
| <i>circLY86-AS1</i> | miR-675-3p          | 1 |
| <i>circLY86-AS1</i> | miR-6750-5p/6822-5p | 3 |
| <i>circLY86-AS1</i> | miR-6755-5p         | 1 |
| <i>circLY86-AS1</i> | miR-6761-3p         | 1 |
| <i>circLY86-AS1</i> | miR-6768-3p         | 1 |
| <i>circLY86-AS1</i> | miR-6768-5p         | 4 |
| <i>circLY86-AS1</i> | miR-6770-5p         | 1 |
| <i>circLY86-AS1</i> | miR-6778-3p         | 1 |
| <i>circLY86-AS1</i> | miR-6785-3p         | 1 |
| <i>circLY86-AS1</i> | miR-6790-3p         | 1 |
| <i>circLY86-AS1</i> | miR-6791-3p/6829-3p | 1 |
| <i>circLY86-AS1</i> | miR-6793-3p         | 1 |
| <i>circLY86-AS1</i> | miR-6800-3p         | 1 |
| <i>circLY86-AS1</i> | miR-6804-3p         | 1 |
| <i>circLY86-AS1</i> | miR-6810-5p         | 1 |
| <i>circLY86-AS1</i> | miR-6813-3p         | 1 |
| <i>circLY86-AS1</i> | miR-6821-3p         | 1 |
| <i>circLY86-AS1</i> | miR-6823-5p         | 1 |
| <i>circLY86-AS1</i> | miR-6826-5p         | 1 |
| <i>circLY86-AS1</i> | miR-6827-5p         | 2 |
| <i>circLY86-AS1</i> | miR-6834-3p         | 1 |
| <i>circLY86-AS1</i> | miR-6836-3p         | 1 |
| <i>circLY86-AS1</i> | miR-6838-3p         | 1 |

|                     |                         |   |
|---------------------|-------------------------|---|
| <i>circLY86-AS1</i> | miR-6841-5p             | 1 |
| <i>circLY86-AS1</i> | miR-6846-3p             | 1 |
| <i>circLY86-AS1</i> | miR-6847-3p             | 1 |
| <i>circLY86-AS1</i> | miR-6847-5p             | 1 |
| <i>circLY86-AS1</i> | miR-6851-3p             | 1 |
| <i>circLY86-AS1</i> | miR-6857-5p             | 1 |
| <i>circLY86-AS1</i> | miR-6859-3p             | 1 |
| <i>circLY86-AS1</i> | miR-6868-5p             | 1 |
| <i>circLY86-AS1</i> | miR-6871-5p             | 1 |
| <i>circLY86-AS1</i> | miR-6882-3p             | 1 |
| <i>circLY86-AS1</i> | miR-6884-3p             | 1 |
| <i>circLY86-AS1</i> | miR-6890-3p             | 1 |
| <i>circLY86-AS1</i> | miR-6894-5p             | 1 |
| <i>circLY86-AS1</i> | miR-7108-5p             | 1 |
| <i>circLY86-AS1</i> | miR-711                 | 1 |
| <i>circLY86-AS1</i> | miR-7112-3p             | 1 |
| <i>circLY86-AS1</i> | miR-7114-5p             | 1 |
| <i>circLY86-AS1</i> | miR-7150                | 1 |
| <i>circLY86-AS1</i> | miR-7154-3p             | 1 |
| <i>circLY86-AS1</i> | miR-7159-3p             | 1 |
| <i>circLY86-AS1</i> | miR-7162-3p             | 1 |
| <i>circLY86-AS1</i> | miR-765                 | 1 |
| <i>circLY86-AS1</i> | miR-766-3p              | 1 |
| <i>circLY86-AS1</i> | miR-766-5p              | 1 |
| <i>circLY86-AS1</i> | miR-7975                | 1 |
| <i>circLY86-AS1</i> | miR-8060                | 1 |
| <i>circLY86-AS1</i> | miR-8062                | 1 |
| <i>circLY86-AS1</i> | miR-8074                | 1 |
| <i>circLY86-AS1</i> | miR-8485                | 1 |
| <i>circLY86-AS1</i> | miR-873-3p              | 1 |
| <i>circLY86-AS1</i> | miR-922                 | 2 |
| <i>circLY86-AS1</i> | miR-940/6808-5p/6893-5p | 1 |
| <i>circLY86-AS1</i> | miR-9500                | 3 |
| <i>circLY86-AS1</i> | miR-96-5p/1271-5p       | 1 |
| <i>circLY86-AS1</i> | miR-28-3p               | 1 |
| <i>circLY86-AS1</i> | miR-4305                | 1 |
| <i>circLY86-AS1</i> | miR-146-5p              | 1 |
| <i>circLY86-AS1</i> | miR-589-5p              | 1 |

|                     |                       |    |
|---------------------|-----------------------|----|
| <i>circLY86-AS1</i> | miR-6782-3p           | 1  |
| <i>circMAML2</i>    | let-7-5p/98-5p        | 1  |
| <i>circMAML2</i>    | let-7a-2-3p/let-7g-3p | 1  |
| <i>circMAML2</i>    | let-7c-3p             | 1  |
| <i>circMAML2</i>    | miR-1-3p/206          | 1  |
| <i>circMAML2</i>    | miR-10-5p             | 1  |
| <i>circMAML2</i>    | miR-100-3p            | 1  |
| <i>circMAML2</i>    | miR-103-3p/107        | 37 |
| <i>circMAML2</i>    | miR-105-3p            | 1  |
| <i>circMAML2</i>    | miR-105-5p            | 2  |
| <i>circMAML2</i>    | miR-10a-3p            | 1  |
| <i>circMAML2</i>    | miR-1180-5p           | 3  |
| <i>circMAML2</i>    | miR-1184              | 2  |
| <i>circMAML2</i>    | miR-1193              | 1  |
| <i>circMAML2</i>    | miR-1197              | 1  |
| <i>circMAML2</i>    | miR-1199-3p           | 1  |
| <i>circMAML2</i>    | miR-1199-5p/6751-3p   | 1  |
| <i>circMAML2</i>    | miR-1200              | 1  |
| <i>circMAML2</i>    | miR-1203              | 1  |
| <i>circMAML2</i>    | miR-1205              | 2  |
| <i>circMAML2</i>    | miR-1207-3p           | 2  |
| <i>circMAML2</i>    | miR-1207-5p/4763-3p   | 2  |
| <i>circMAML2</i>    | miR-1225-3p           | 1  |
| <i>circMAML2</i>    | miR-1226-3p           | 3  |
| <i>circMAML2</i>    | miR-1228-3p           | 1  |
| <i>circMAML2</i>    | miR-1233-3p           | 1  |
| <i>circMAML2</i>    | miR-1236-3p           | 1  |
| <i>circMAML2</i>    | miR-1236-5p           | 1  |
| <i>circMAML2</i>    | miR-1237-3p           | 3  |
| <i>circMAML2</i>    | miR-1238-5p/4758-5p   | 1  |
| <i>circMAML2</i>    | miR-1243              | 1  |
| <i>circMAML2</i>    | miR-1245a/8079        | 1  |
| <i>circMAML2</i>    | miR-1245b-3p          | 1  |
| <i>circMAML2</i>    | miR-1246              | 2  |
| <i>circMAML2</i>    | miR-1247-5p           | 1  |
| <i>circMAML2</i>    | miR-1248              | 3  |
| <i>circMAML2</i>    | miR-1250-3p           | 1  |
| <i>circMAML2</i>    | miR-1251-3p           | 1  |

|                  |                                      |    |
|------------------|--------------------------------------|----|
| <i>circMAML2</i> | miR-1252-3p                          | 1  |
| <i>circMAML2</i> | miR-1252-5p                          | 1  |
| <i>circMAML2</i> | miR-1254/3116                        | 1  |
| <i>circMAML2</i> | miR-1255a/1255b-5p                   | 1  |
| <i>circMAML2</i> | miR-1257                             | 1  |
| <i>circMAML2</i> | miR-1264                             | 1  |
| <i>circMAML2</i> | miR-1265                             | 1  |
| <i>circMAML2</i> | miR-1266-3p                          | 1  |
| <i>circMAML2</i> | miR-1266-5p/4518                     | 3  |
| <i>circMAML2</i> | miR-1270                             | 3  |
| <i>circMAML2</i> | miR-1273h-3p                         | 1  |
| <i>circMAML2</i> | miR-1285-5p                          | 1  |
| <i>circMAML2</i> | miR-1286                             | 6  |
| <i>circMAML2</i> | miR-1287-5p                          | 1  |
| <i>circMAML2</i> | miR-1288-5p                          | 1  |
| <i>circMAML2</i> | miR-129-3p                           | 1  |
| <i>circMAML2</i> | miR-1291/6775-3p                     | 1  |
| <i>circMAML2</i> | miR-1293/4483                        | 1  |
| <i>circMAML2</i> | miR-1295a                            | 1  |
| <i>circMAML2</i> | miR-1295b-5p/1912                    | 1  |
| <i>circMAML2</i> | miR-1301-3p                          | 2  |
| <i>circMAML2</i> | miR-1324                             | 2  |
| <i>circMAML2</i> | miR-133a-3p.2/133b                   | 1  |
| <i>circMAML2</i> | miR-1343-3p                          | 1  |
| <i>circMAML2</i> | miR-135-5p                           | 2  |
| <i>circMAML2</i> | miR-136-5p                           | 1  |
| <i>circMAML2</i> | miR-140-3p.1                         | 1  |
| <i>circMAML2</i> | miR-141-3p/200-3p                    | 1  |
| <i>circMAML2</i> | miR-142-5p                           | 1  |
| <i>circMAML2</i> | miR-143-5p                           | 1  |
| <i>circMAML2</i> | miR-144-5p                           | 1  |
| <i>circMAML2</i> | miR-146-5p                           | 2  |
| <i>circMAML2</i> | miR-1468-3p                          | 2  |
| <i>circMAML2</i> | miR-1470                             | 1  |
| <i>circMAML2</i> | miR-15-5p/16-5p/195-5p/424-5p/497-5p | 36 |
| <i>circMAML2</i> | miR-150-5p                           | 1  |
| <i>circMAML2</i> | miR-153-5p                           | 2  |
| <i>circMAML2</i> | miR-1539                             | 1  |

|                  |                                     |    |
|------------------|-------------------------------------|----|
| <i>circMAML2</i> | miR-155-3p                          | 2  |
| <i>circMAML2</i> | miR-1587/3620-5p                    | 1  |
| <i>circMAML2</i> | miR-15b-3p                          | 1  |
| <i>circMAML2</i> | miR-17-3p                           | 2  |
| <i>circMAML2</i> | miR-17-5p/20-5p/93-5p/106-5p/519-3p | 1  |
| <i>circMAML2</i> | miR-18-5p                           | 1  |
| <i>circMAML2</i> | miR-181-5p                          | 2  |
| <i>circMAML2</i> | miR-185-5p                          | 1  |
| <i>circMAML2</i> | miR-186-5p                          | 3  |
| <i>circMAML2</i> | miR-188-5p                          | 1  |
| <i>circMAML2</i> | miR-18a-3p                          | 2  |
| <i>circMAML2</i> | miR-19-5p                           | 1  |
| <i>circMAML2</i> | miR-1910-5p                         | 1  |
| <i>circMAML2</i> | miR-1911-3p                         | 1  |
| <i>circMAML2</i> | miR-1915-3p/6764-5p                 | 1  |
| <i>circMAML2</i> | miR-1915-5p                         | 3  |
| <i>circMAML2</i> | miR-192-3p                          | 2  |
| <i>circMAML2</i> | miR-192-5p/215-5p                   | 1  |
| <i>circMAML2</i> | miR-196-5p                          | 1  |
| <i>circMAML2</i> | miR-196a-3p                         | 1  |
| <i>circMAML2</i> | miR-197-3p                          | 1  |
| <i>circMAML2</i> | miR-197-5p/3132                     | 1  |
| <i>circMAML2</i> | miR-1976                            | 2  |
| <i>circMAML2</i> | miR-200-3p/429                      | 1  |
| <i>circMAML2</i> | miR-202-5p                          | 1  |
| <i>circMAML2</i> | miR-203b-3p                         | 2  |
| <i>circMAML2</i> | miR-204-5p/211-5p                   | 1  |
| <i>circMAML2</i> | miR-205-3p                          | 2  |
| <i>circMAML2</i> | miR-205-5p                          | 1  |
| <i>circMAML2</i> | miR-2052                            | 1  |
| <i>circMAML2</i> | miR-21-3p/3591-3p                   | 1  |
| <i>circMAML2</i> | miR-210-5p                          | 2  |
| <i>circMAML2</i> | miR-2110                            | 1  |
| <i>circMAML2</i> | miR-2113                            | 1  |
| <i>circMAML2</i> | miR-2114-5p                         | 1  |
| <i>circMAML2</i> | miR-2116-3p                         | 1  |
| <i>circMAML2</i> | miR-214-3p/3619-5p                  | 40 |
| <i>circMAML2</i> | miR-214-5p                          | 1  |

|                  |                                     |    |
|------------------|-------------------------------------|----|
| <i>circMAML2</i> | miR-216a-5p                         | 2  |
| <i>circMAML2</i> | miR-216b-5p                         | 2  |
| <i>circMAML2</i> | miR-219b-5p                         | 1  |
| <i>circMAML2</i> | miR-22-3p                           | 2  |
| <i>circMAML2</i> | miR-221-5p/8073                     | 1  |
| <i>circMAML2</i> | miR-224-5p                          | 1  |
| <i>circMAML2</i> | miR-2276-5p                         | 2  |
| <i>circMAML2</i> | miR-23-5p                           | 1  |
| <i>circMAML2</i> | miR-2355-5p                         | 1  |
| <i>circMAML2</i> | miR-2392                            | 1  |
| <i>circMAML2</i> | miR-24-3p                           | 1  |
| <i>circMAML2</i> | miR-24-5p                           | 1  |
| <i>circMAML2</i> | miR-2467-3p                         | 2  |
| <i>circMAML2</i> | miR-25-3p/32-5p/92-3p/363-3p/367-3p | 1  |
| <i>circMAML2</i> | miR-26b-3p                          | 1  |
| <i>circMAML2</i> | miR-27a-5p                          | 2  |
| <i>circMAML2</i> | miR-28-5p/708-5p                    | 2  |
| <i>circMAML2</i> | miR-2861                            | 1  |
| <i>circMAML2</i> | miR-29-3p                           | 3  |
| <i>circMAML2</i> | miR-296-3p                          | 1  |
| <i>circMAML2</i> | miR-296-5p                          | 1  |
| <i>circMAML2</i> | miR-298                             | 1  |
| <i>circMAML2</i> | miR-30-3p                           | 2  |
| <i>circMAML2</i> | miR-302a-5p                         | 1  |
| <i>circMAML2</i> | miR-302c-5p                         | 3  |
| <i>circMAML2</i> | miR-3064-3p                         | 2  |
| <i>circMAML2</i> | miR-3065-3p                         | 2  |
| <i>circMAML2</i> | miR-3065-5p                         | 6  |
| <i>circMAML2</i> | miR-3074-3p                         | 1  |
| <i>circMAML2</i> | miR-3119                            | 1  |
| <i>circMAML2</i> | miR-3120-3p                         | 15 |
| <i>circMAML2</i> | miR-3120-5p                         | 1  |
| <i>circMAML2</i> | miR-3121-3p                         | 1  |
| <i>circMAML2</i> | miR-3121-5p                         | 3  |
| <i>circMAML2</i> | miR-3123                            | 1  |
| <i>circMAML2</i> | miR-3125/3916/6859-5p               | 1  |
| <i>circMAML2</i> | miR-3127-5p                         | 3  |
| <i>circMAML2</i> | miR-3128                            | 2  |

|                  |                           |   |
|------------------|---------------------------|---|
| <i>circMAML2</i> | miR-3130-5p/4482-5p       | 1 |
| <i>circMAML2</i> | miR-3133                  | 3 |
| <i>circMAML2</i> | miR-3134                  | 1 |
| <i>circMAML2</i> | miR-3135b                 | 1 |
| <i>circMAML2</i> | miR-3138                  | 1 |
| <i>circMAML2</i> | miR-3143                  | 2 |
| <i>circMAML2</i> | miR-3147                  | 1 |
| <i>circMAML2</i> | miR-3150a-3p              | 1 |
| <i>circMAML2</i> | miR-3150b-3p              | 1 |
| <i>circMAML2</i> | miR-3152-5p               | 2 |
| <i>circMAML2</i> | miR-3154                  | 1 |
| <i>circMAML2</i> | miR-3157-3p               | 2 |
| <i>circMAML2</i> | miR-3157-5p               | 7 |
| <i>circMAML2</i> | miR-3158-5p               | 2 |
| <i>circMAML2</i> | miR-3160-3p               | 1 |
| <i>circMAML2</i> | miR-3166                  | 1 |
| <i>circMAML2</i> | miR-3170/6855-5p          | 1 |
| <i>circMAML2</i> | miR-3173-3p/6891-5p       | 2 |
| <i>circMAML2</i> | miR-3175                  | 1 |
| <i>circMAML2</i> | miR-3176/3922-3p          | 1 |
| <i>circMAML2</i> | miR-3182                  | 2 |
| <i>circMAML2</i> | miR-3183/4723-3p/6769b-3p | 1 |
| <i>circMAML2</i> | miR-3184-3p               | 1 |
| <i>circMAML2</i> | miR-3187-3p               | 2 |
| <i>circMAML2</i> | miR-3190-5p               | 1 |
| <i>circMAML2</i> | miR-3191-5p               | 1 |
| <i>circMAML2</i> | miR-3193                  | 1 |
| <i>circMAML2</i> | miR-3194-5p               | 1 |
| <i>circMAML2</i> | miR-32-3p                 | 2 |
| <i>circMAML2</i> | miR-320                   | 1 |
| <i>circMAML2</i> | miR-3200-3p               | 2 |
| <i>circMAML2</i> | miR-320e                  | 1 |
| <i>circMAML2</i> | miR-324-3p/1913           | 2 |
| <i>circMAML2</i> | miR-328-3p                | 1 |
| <i>circMAML2</i> | miR-330-3p                | 1 |
| <i>circMAML2</i> | miR-330-3p.2              | 1 |
| <i>circMAML2</i> | miR-331-3p                | 1 |
| <i>circMAML2</i> | miR-331-5p                | 1 |

|                  |                           |   |
|------------------|---------------------------|---|
| <i>circMAML2</i> | miR-335-5p                | 1 |
| <i>circMAML2</i> | miR-338-3p                | 3 |
| <i>circMAML2</i> | miR-34a-3p                | 2 |
| <i>circMAML2</i> | miR-3529-3p               | 5 |
| <i>circMAML2</i> | miR-3606-5p               | 1 |
| <i>circMAML2</i> | miR-361-3p                | 2 |
| <i>circMAML2</i> | miR-3614-3p               | 4 |
| <i>circMAML2</i> | miR-3617-3p               | 2 |
| <i>circMAML2</i> | miR-3619-3p               | 1 |
| <i>circMAML2</i> | miR-363-5p/6745           | 1 |
| <i>circMAML2</i> | miR-3646                  | 1 |
| <i>circMAML2</i> | miR-3649                  | 1 |
| <i>circMAML2</i> | miR-365-3p                | 1 |
| <i>circMAML2</i> | miR-3653-5p               | 2 |
| <i>circMAML2</i> | miR-3654                  | 1 |
| <i>circMAML2</i> | miR-3663-3p               | 1 |
| <i>circMAML2</i> | miR-3663-5p               | 1 |
| <i>circMAML2</i> | miR-3664-3p               | 3 |
| <i>circMAML2</i> | miR-3664-5p               | 3 |
| <i>circMAML2</i> | miR-3667-3p               | 1 |
| <i>circMAML2</i> | miR-3670                  | 2 |
| <i>circMAML2</i> | miR-3675-3p               | 2 |
| <i>circMAML2</i> | miR-3678-3p               | 1 |
| <i>circMAML2</i> | miR-3680-5p               | 1 |
| <i>circMAML2</i> | miR-3682-5p               | 1 |
| <i>circMAML2</i> | miR-3685                  | 1 |
| <i>circMAML2</i> | miR-3689d/6851-5p         | 1 |
| <i>circMAML2</i> | miR-3690                  | 1 |
| <i>circMAML2</i> | miR-3691-3p               | 1 |
| <i>circMAML2</i> | miR-3692-5p               | 1 |
| <i>circMAML2</i> | miR-371-5p                | 1 |
| <i>circMAML2</i> | miR-3713                  | 1 |
| <i>circMAML2</i> | miR-371b-5p/373-5p/616-5p | 1 |
| <i>circMAML2</i> | miR-372-5p                | 1 |
| <i>circMAML2</i> | miR-375                   | 1 |
| <i>circMAML2</i> | miR-378-3p                | 1 |
| <i>circMAML2</i> | miR-378a-5p               | 1 |
| <i>circMAML2</i> | miR-383-3p                | 2 |



|                  |                       |   |
|------------------|-----------------------|---|
| <i>circMAML2</i> | miR-383-5p.2          | 1 |
| <i>circMAML2</i> | miR-384               | 1 |
| <i>circMAML2</i> | miR-3909              | 1 |
| <i>circMAML2</i> | miR-3914              | 1 |
| <i>circMAML2</i> | miR-3918              | 2 |
| <i>circMAML2</i> | miR-3922-5p           | 1 |
| <i>circMAML2</i> | miR-3925-3p           | 1 |
| <i>circMAML2</i> | miR-3925-5p           | 1 |
| <i>circMAML2</i> | miR-3926              | 2 |
| <i>circMAML2</i> | miR-3927-3p/6831-5p   | 1 |
| <i>circMAML2</i> | miR-3927-5p           | 1 |
| <i>circMAML2</i> | miR-3934-3p           | 1 |
| <i>circMAML2</i> | miR-3941              | 1 |
| <i>circMAML2</i> | miR-3943              | 1 |
| <i>circMAML2</i> | miR-3973              | 1 |
| <i>circMAML2</i> | miR-3974              | 1 |
| <i>circMAML2</i> | miR-421               | 1 |
| <i>circMAML2</i> | miR-4252              | 1 |
| <i>circMAML2</i> | miR-4254              | 1 |
| <i>circMAML2</i> | miR-4257              | 1 |
| <i>circMAML2</i> | miR-4260              | 1 |
| <i>circMAML2</i> | miR-4264              | 1 |
| <i>circMAML2</i> | miR-4268              | 1 |
| <i>circMAML2</i> | miR-4270/4441/6754-5p | 1 |
| <i>circMAML2</i> | miR-4279              | 4 |
| <i>circMAML2</i> | miR-4284              | 1 |
| <i>circMAML2</i> | miR-4290              | 3 |
| <i>circMAML2</i> | miR-4291              | 5 |
| <i>circMAML2</i> | miR-4292/6791-5p      | 1 |
| <i>circMAML2</i> | miR-4293              | 1 |
| <i>circMAML2</i> | miR-4297/5581-5p      | 3 |
| <i>circMAML2</i> | miR-4308              | 1 |
| <i>circMAML2</i> | miR-431-5p            | 1 |
| <i>circMAML2</i> | miR-4310/7157-5p      | 1 |
| <i>circMAML2</i> | miR-4312              | 2 |
| <i>circMAML2</i> | miR-4313              | 1 |
| <i>circMAML2</i> | miR-4317              | 1 |
| <i>circMAML2</i> | miR-432-3p            | 1 |

|                  |                                              |   |
|------------------|----------------------------------------------|---|
| <i>circMAML2</i> | miR-4323                                     | 1 |
| <i>circMAML2</i> | miR-4324                                     | 1 |
| <i>circMAML2</i> | miR-4326                                     | 1 |
| <i>circMAML2</i> | miR-4330                                     | 3 |
| <i>circMAML2</i> | miR-4417                                     | 1 |
| <i>circMAML2</i> | miR-4422                                     | 1 |
| <i>circMAML2</i> | miR-4425                                     | 1 |
| <i>circMAML2</i> | miR-4428                                     | 2 |
| <i>circMAML2</i> | miR-4432                                     | 1 |
| <i>circMAML2</i> | miR-4433a-3p                                 | 2 |
| <i>circMAML2</i> | miR-4434/4516/5703                           | 5 |
| <i>circMAML2</i> | miR-4435                                     | 2 |
| <i>circMAML2</i> | miR-4436b-3p/4632-5p/6735-5p/6879-5p/7843-5p |   |
| <i>circMAML2</i> | miR-4436b-5p                                 | 1 |
| <i>circMAML2</i> | miR-4438                                     | 1 |
| <i>circMAML2</i> | miR-4448                                     | 1 |
| <i>circMAML2</i> | miR-4459                                     | 2 |
| <i>circMAML2</i> | miR-4467                                     | 1 |
| <i>circMAML2</i> | miR-4476/6876-5p                             | 1 |
| <i>circMAML2</i> | miR-4477a                                    | 1 |
| <i>circMAML2</i> | miR-4480                                     | 2 |
| <i>circMAML2</i> | miR-4487                                     | 1 |
| <i>circMAML2</i> | miR-4502                                     | 1 |
| <i>circMAML2</i> | miR-4506                                     | 1 |
| <i>circMAML2</i> | miR-450a-2-3p                                | 1 |
| <i>circMAML2</i> | miR-450b-3p/769-3p                           | 1 |
| <i>circMAML2</i> | miR-4512                                     | 1 |
| <i>circMAML2</i> | miR-452-5p/892-3p                            | 1 |
| <i>circMAML2</i> | miR-4520-3p                                  | 2 |
| <i>circMAML2</i> | miR-4521                                     | 1 |
| <i>circMAML2</i> | miR-4522                                     | 1 |
| <i>circMAML2</i> | miR-4524b-3p                                 | 1 |
| <i>circMAML2</i> | miR-4530                                     | 3 |
| <i>circMAML2</i> | miR-4531                                     | 3 |
| <i>circMAML2</i> | miR-4534/8082                                | 1 |
| <i>circMAML2</i> | miR-4535                                     | 1 |
| <i>circMAML2</i> | miR-455-3p.1                                 | 1 |
| <i>circMAML2</i> | miR-455-3p.2                                 | 1 |

|                  |                          |    |
|------------------|--------------------------|----|
| <i>circMAML2</i> | miR-4635                 | 2  |
| <i>circMAML2</i> | miR-4637                 | 1  |
| <i>circMAML2</i> | miR-4638-3p              | 1  |
| <i>circMAML2</i> | miR-4639-3p              | 1  |
| <i>circMAML2</i> | miR-4639-5p              | 2  |
| <i>circMAML2</i> | miR-4641                 | 1  |
| <i>circMAML2</i> | miR-4643                 | 1  |
| <i>circMAML2</i> | miR-4645-5p/4673         | 1  |
| <i>circMAML2</i> | miR-4649-3p              | 1  |
| <i>circMAML2</i> | miR-4652-3p              | 1  |
| <i>circMAML2</i> | miR-4655-5p              | 1  |
| <i>circMAML2</i> | miR-4658/6790-5p         | 1  |
| <i>circMAML2</i> | miR-4659a-5p/4659b-5p    | 1  |
| <i>circMAML2</i> | miR-4660                 | 1  |
| <i>circMAML2</i> | miR-4661-3p              | 1  |
| <i>circMAML2</i> | miR-4663                 | 1  |
| <i>circMAML2</i> | miR-4666a-5p             | 1  |
| <i>circMAML2</i> | miR-4667-3p              | 1  |
| <i>circMAML2</i> | miR-4667-5p/4700-5p/8089 | 1  |
| <i>circMAML2</i> | miR-4668-3p              | 1  |
| <i>circMAML2</i> | miR-4670-3p              | 1  |
| <i>circMAML2</i> | miR-4670-5p              | 1  |
| <i>circMAML2</i> | miR-4672                 | 1  |
| <i>circMAML2</i> | miR-4674                 | 1  |
| <i>circMAML2</i> | miR-4684-5p              | 1  |
| <i>circMAML2</i> | miR-4685-5p/6837-5p      | 2  |
| <i>circMAML2</i> | miR-4687-5p              | 1  |
| <i>circMAML2</i> | miR-4690-3p/5685         | 5  |
| <i>circMAML2</i> | miR-4690-5p              | 1  |
| <i>circMAML2</i> | miR-4691-3p              | 1  |
| <i>circMAML2</i> | miR-4695-3p              | 1  |
| <i>circMAML2</i> | miR-4695-5p              | 1  |
| <i>circMAML2</i> | miR-4704-5p              | 1  |
| <i>circMAML2</i> | miR-4709-5p              | 15 |
| <i>circMAML2</i> | miR-4714-5p              | 3  |
| <i>circMAML2</i> | miR-4715-3p              | 2  |
| <i>circMAML2</i> | miR-4717-3p              | 1  |
| <i>circMAML2</i> | miR-4720-3p              | 1  |

|                  |                             |   |
|------------------|-----------------------------|---|
| <i>circMAML2</i> | miR-4720-5p/4799-3p/5588-5p | 2 |
| <i>circMAML2</i> | miR-4722-3p/6727-3p         | 2 |
| <i>circMAML2</i> | miR-4722-5p                 | 6 |
| <i>circMAML2</i> | miR-4725-5p                 | 1 |
| <i>circMAML2</i> | miR-4726-3p                 | 1 |
| <i>circMAML2</i> | miR-4727-5p                 | 2 |
| <i>circMAML2</i> | miR-4729                    | 1 |
| <i>circMAML2</i> | miR-4730                    | 1 |
| <i>circMAML2</i> | miR-4733-3p                 | 3 |
| <i>circMAML2</i> | miR-4733-5p                 | 2 |
| <i>circMAML2</i> | miR-4736                    | 2 |
| <i>circMAML2</i> | miR-4743-3p                 | 1 |
| <i>circMAML2</i> | miR-4743-5p                 | 1 |
| <i>circMAML2</i> | miR-4747-3p                 | 2 |
| <i>circMAML2</i> | miR-4749-3p                 | 2 |
| <i>circMAML2</i> | miR-4750-3p                 | 1 |
| <i>circMAML2</i> | miR-4752                    | 1 |
| <i>circMAML2</i> | miR-4753-5p                 | 1 |
| <i>circMAML2</i> | miR-4755-3p                 | 2 |
| <i>circMAML2</i> | miR-4757-5p/6744-3p         | 1 |
| <i>circMAML2</i> | miR-4761-3p                 | 1 |
| <i>circMAML2</i> | miR-4761-5p                 | 1 |
| <i>circMAML2</i> | miR-4763-5p                 | 1 |
| <i>circMAML2</i> | miR-4764-3p                 | 1 |
| <i>circMAML2</i> | miR-4765                    | 1 |
| <i>circMAML2</i> | miR-4768-3p                 | 2 |
| <i>circMAML2</i> | miR-4768-5p/6833-3p         | 1 |
| <i>circMAML2</i> | miR-4769-3p/6817-5p         | 2 |
| <i>circMAML2</i> | miR-4771                    | 1 |
| <i>circMAML2</i> | miR-4773                    | 3 |
| <i>circMAML2</i> | miR-4774-3p                 | 2 |
| <i>circMAML2</i> | miR-4776-3p                 | 2 |
| <i>circMAML2</i> | miR-4776-5p                 | 1 |
| <i>circMAML2</i> | miR-4778-3p                 | 1 |
| <i>circMAML2</i> | miR-4779                    | 1 |
| <i>circMAML2</i> | miR-4788                    | 1 |
| <i>circMAML2</i> | miR-4789-3p                 | 1 |
| <i>circMAML2</i> | miR-4790-3p                 | 1 |

|                  |                             |    |
|------------------|-----------------------------|----|
| <i>circMAML2</i> | miR-4797-3p                 | 1  |
| <i>circMAML2</i> | miR-4797-5p                 | 1  |
| <i>circMAML2</i> | miR-4798-3p                 | 1  |
| <i>circMAML2</i> | miR-4800-5p                 | 1  |
| <i>circMAML2</i> | miR-4802-3p                 | 2  |
| <i>circMAML2</i> | miR-4802-5p                 | 2  |
| <i>circMAML2</i> | miR-4803                    | 1  |
| <i>circMAML2</i> | miR-4804-3p                 | 1  |
| <i>circMAML2</i> | miR-484/3155                | 3  |
| <i>circMAML2</i> | miR-490-5p                  | 3  |
| <i>circMAML2</i> | miR-492                     | 1  |
| <i>circMAML2</i> | miR-493-5p                  | 1  |
| <i>circMAML2</i> | miR-4999-3p                 | 1  |
| <i>circMAML2</i> | miR-5000-3p                 | 1  |
| <i>circMAML2</i> | miR-5000-5p                 | 1  |
| <i>circMAML2</i> | miR-5001-3p                 | 2  |
| <i>circMAML2</i> | miR-5002-5p                 | 1  |
| <i>circMAML2</i> | miR-5008-3p/6737-3p/7157-3p | 1  |
| <i>circMAML2</i> | miR-5008-5p                 | 1  |
| <i>circMAML2</i> | miR-500b-3p                 | 2  |
| <i>circMAML2</i> | miR-5010-3p                 | 1  |
| <i>circMAML2</i> | miR-502-5p                  | 1  |
| <i>circMAML2</i> | miR-503-5p                  | 36 |
| <i>circMAML2</i> | miR-504-3p                  | 1  |
| <i>circMAML2</i> | miR-504-5p.1                | 1  |
| <i>circMAML2</i> | miR-505-3p.2                | 1  |
| <i>circMAML2</i> | miR-506-5p                  | 1  |
| <i>circMAML2</i> | miR-5088-3p                 | 2  |
| <i>circMAML2</i> | miR-5089-5p                 | 1  |
| <i>circMAML2</i> | miR-5091                    | 1  |
| <i>circMAML2</i> | miR-510-3p                  | 1  |
| <i>circMAML2</i> | miR-5100                    | 2  |
| <i>circMAML2</i> | miR-511-5p                  | 1  |
| <i>circMAML2</i> | miR-512-5p                  | 2  |
| <i>circMAML2</i> | miR-514a-5p                 | 3  |
| <i>circMAML2</i> | miR-515-5p/519e-5p          | 3  |
| <i>circMAML2</i> | miR-5189-3p                 | 2  |
| <i>circMAML2</i> | miR-5192                    | 1  |

|                  |                                                                    |   |
|------------------|--------------------------------------------------------------------|---|
| <i>circMAML2</i> | miR-5193                                                           | 1 |
| <i>circMAML2</i> | miR-5195-5p                                                        | 1 |
| <i>circMAML2</i> | miR-5197-5p                                                        | 3 |
| <i>circMAML2</i> | miR-519d-5p                                                        | 2 |
| <i>circMAML2</i> | miR-520g-3p                                                        | 1 |
| <i>circMAML2</i> | miR-526b-5p                                                        | 1 |
| <i>circMAML2</i> | miR-532-3p                                                         | 1 |
| <i>circMAML2</i> | miR-532-5p                                                         | 2 |
| <i>circMAML2</i> | miR-539-5p                                                         | 2 |
| <i>circMAML2</i> | miR-543                                                            | 1 |
| <i>circMAML2</i> | miR-544a                                                           | 1 |
| <i>circMAML2</i> | miR-544b                                                           | 1 |
| <i>circMAML2</i> | miR-545-3p                                                         | 1 |
| <i>circMAML2</i> | miR-545-5p                                                         | 1 |
| <i>circMAML2</i> | miR-548ah-5p/3609                                                  | 1 |
| <i>circMAML2</i> | miR-548aj-5p/548f-5p/548g-5p/548x-5p                               | 2 |
| <i>circMAML2</i> | miR-548ao-5p/548ax                                                 | 1 |
| <i>circMAML2</i> | miR-548av-5p/548k/8054                                             | 1 |
| <i>circMAML2</i> | miR-548ay-5p/548au-5p/548as-5p/548ar-5p/548aq-5p/548ap-5p/548am-5p | 1 |
| <i>circMAML2</i> | miR-548az-5p/548t-5p                                               | 1 |
| <i>circMAML2</i> | miR-548e-5p                                                        | 2 |
| <i>circMAML2</i> | miR-548l                                                           | 1 |
| <i>circMAML2</i> | miR-548n                                                           | 1 |
| <i>circMAML2</i> | miR-548p                                                           | 4 |
| <i>circMAML2</i> | miR-548s                                                           | 2 |
| <i>circMAML2</i> | miR-548u/7161-5p                                                   | 1 |
| <i>circMAML2</i> | miR-549a                                                           | 1 |
| <i>circMAML2</i> | miR-550a-3-5p/550a-5p/1271-3p                                      | 1 |
| <i>circMAML2</i> | miR-550b-2-5p                                                      | 1 |
| <i>circMAML2</i> | miR-551-3p                                                         | 1 |
| <i>circMAML2</i> | miR-552-3p                                                         | 1 |
| <i>circMAML2</i> | miR-552-5p                                                         | 3 |
| <i>circMAML2</i> | miR-556-5p                                                         | 1 |
| <i>circMAML2</i> | miR-5572                                                           | 1 |
| <i>circMAML2</i> | miR-558                                                            | 1 |
| <i>circMAML2</i> | miR-5580-3p                                                        | 1 |
| <i>circMAML2</i> | miR-5580-5p                                                        | 3 |
| <i>circMAML2</i> | miR-5581-3p                                                        | 1 |

|                  |                  |   |
|------------------|------------------|---|
| <i>circMAML2</i> | miR-5585-3p      | 1 |
| <i>circMAML2</i> | miR-5585-5p      | 1 |
| <i>circMAML2</i> | miR-5587-5p      | 2 |
| <i>circMAML2</i> | miR-5588-3p      | 1 |
| <i>circMAML2</i> | miR-5589-3p      | 1 |
| <i>circMAML2</i> | miR-5590-5p      | 1 |
| <i>circMAML2</i> | miR-5591-3p      | 1 |
| <i>circMAML2</i> | miR-5683         | 1 |
| <i>circMAML2</i> | miR-5692a        | 1 |
| <i>circMAML2</i> | miR-5694         | 1 |
| <i>circMAML2</i> | miR-5695         | 2 |
| <i>circMAML2</i> | miR-5696         | 2 |
| <i>circMAML2</i> | miR-570-3p       | 1 |
| <i>circMAML2</i> | miR-5700         | 1 |
| <i>circMAML2</i> | miR-5704         | 1 |
| <i>circMAML2</i> | miR-5739         | 1 |
| <i>circMAML2</i> | miR-575/4676-5p  | 4 |
| <i>circMAML2</i> | miR-576-3p       | 1 |
| <i>circMAML2</i> | miR-578          | 1 |
| <i>circMAML2</i> | miR-579-3p       | 2 |
| <i>circMAML2</i> | miR-588          | 2 |
| <i>circMAML2</i> | miR-589-3p       | 1 |
| <i>circMAML2</i> | miR-589-5p       | 2 |
| <i>circMAML2</i> | miR-591          | 1 |
| <i>circMAML2</i> | miR-593-5p       | 1 |
| <i>circMAML2</i> | miR-596          | 1 |
| <i>circMAML2</i> | miR-605-5p       | 1 |
| <i>circMAML2</i> | miR-606          | 1 |
| <i>circMAML2</i> | miR-6068         | 1 |
| <i>circMAML2</i> | miR-6071         | 1 |
| <i>circMAML2</i> | miR-6072/6891-3p | 1 |
| <i>circMAML2</i> | miR-6075         | 1 |
| <i>circMAML2</i> | miR-6081         | 2 |
| <i>circMAML2</i> | miR-6089         | 1 |
| <i>circMAML2</i> | miR-6165         | 1 |
| <i>circMAML2</i> | miR-618          | 1 |
| <i>circMAML2</i> | miR-623          | 1 |
| <i>circMAML2</i> | miR-624-3p       | 2 |

|                  |                             |    |
|------------------|-----------------------------|----|
| <i>circMAML2</i> | miR-629-3p                  | 2  |
| <i>circMAML2</i> | miR-633                     | 1  |
| <i>circMAML2</i> | miR-634                     | 3  |
| <i>circMAML2</i> | miR-635/6774-5p             | 1  |
| <i>circMAML2</i> | miR-637                     | 1  |
| <i>circMAML2</i> | miR-642a-5p                 | 1  |
| <i>circMAML2</i> | miR-645                     | 1  |
| <i>circMAML2</i> | miR-646                     | 36 |
| <i>circMAML2</i> | miR-6501-3p                 | 3  |
| <i>circMAML2</i> | miR-6507-3p                 | 1  |
| <i>circMAML2</i> | miR-6507-5p                 | 1  |
| <i>circMAML2</i> | miR-6509-3p                 | 1  |
| <i>circMAML2</i> | miR-6510-5p                 | 1  |
| <i>circMAML2</i> | miR-6511-3p                 | 1  |
| <i>circMAML2</i> | miR-6511-5p                 | 3  |
| <i>circMAML2</i> | miR-6514-3p                 | 1  |
| <i>circMAML2</i> | miR-6514-5p                 | 2  |
| <i>circMAML2</i> | miR-6515-3p                 | 1  |
| <i>circMAML2</i> | miR-6516-5p                 | 2  |
| <i>circMAML2</i> | miR-652-5p                  | 1  |
| <i>circMAML2</i> | miR-654-5p                  | 1  |
| <i>circMAML2</i> | miR-659-5p                  | 1  |
| <i>circMAML2</i> | miR-660-3p                  | 1  |
| <i>circMAML2</i> | miR-660-5p                  | 2  |
| <i>circMAML2</i> | miR-661                     | 1  |
| <i>circMAML2</i> | miR-663b                    | 1  |
| <i>circMAML2</i> | miR-6715b-3p                | 1  |
| <i>circMAML2</i> | miR-6721-5p                 | 1  |
| <i>circMAML2</i> | miR-6728-3p                 | 3  |
| <i>circMAML2</i> | miR-6728-5p                 | 1  |
| <i>circMAML2</i> | miR-6729-3p                 | 1  |
| <i>circMAML2</i> | miR-6731-5p/8085            | 1  |
| <i>circMAML2</i> | miR-6734-3p                 | 1  |
| <i>circMAML2</i> | miR-6735-3p                 | 1  |
| <i>circMAML2</i> | miR-6736-3p                 | 2  |
| <i>circMAML2</i> | miR-6737-5p/6812-5p/6819-5p | 1  |
| <i>circMAML2</i> | miR-6738-3p                 | 1  |
| <i>circMAML2</i> | miR-6742-3p                 | 1  |



|                  |                       |   |
|------------------|-----------------------|---|
| <i>circMAML2</i> | miR-6744-5p           | 1 |
| <i>circMAML2</i> | miR-6747-3p           | 2 |
| <i>circMAML2</i> | miR-6749-5p           | 1 |
| <i>circMAML2</i> | miR-6750-3p           | 2 |
| <i>circMAML2</i> | miR-6752-3p           | 1 |
| <i>circMAML2</i> | miR-6753-5p           | 1 |
| <i>circMAML2</i> | miR-6756-5p/6766-5p   | 1 |
| <i>circMAML2</i> | miR-6758-3p           | 1 |
| <i>circMAML2</i> | miR-6759-3p           | 2 |
| <i>circMAML2</i> | miR-676-3p            | 1 |
| <i>circMAML2</i> | miR-6765-5p           | 1 |
| <i>circMAML2</i> | miR-6769a-3p          | 1 |
| <i>circMAML2</i> | miR-6769a-5p/6769b-5p | 1 |
| <i>circMAML2</i> | miR-6770-3p           | 1 |
| <i>circMAML2</i> | miR-6778-3p           | 2 |
| <i>circMAML2</i> | miR-6779-3p           | 1 |
| <i>circMAML2</i> | miR-6782-3p           | 1 |
| <i>circMAML2</i> | miR-6784-3p/6862-3p   | 1 |
| <i>circMAML2</i> | miR-6787-3p           | 4 |
| <i>circMAML2</i> | miR-6791-3p/6829-3p   | 2 |
| <i>circMAML2</i> | miR-6792-5p           | 1 |
| <i>circMAML2</i> | miR-6795-3p           | 2 |
| <i>circMAML2</i> | miR-6796-3p           | 1 |
| <i>circMAML2</i> | miR-6801-3p/6810-3p   | 1 |
| <i>circMAML2</i> | miR-6801-5p           | 3 |
| <i>circMAML2</i> | miR-6804-3p           | 1 |
| <i>circMAML2</i> | miR-6807-5p           | 1 |
| <i>circMAML2</i> | miR-6809-3p           | 1 |
| <i>circMAML2</i> | miR-6810-5p           | 1 |
| <i>circMAML2</i> | miR-6811-3p           | 1 |
| <i>circMAML2</i> | miR-6813-3p           | 2 |
| <i>circMAML2</i> | miR-6814-5p           | 1 |
| <i>circMAML2</i> | miR-6815-5p/6865-5p   | 1 |
| <i>circMAML2</i> | miR-6817-3p           | 1 |
| <i>circMAML2</i> | miR-6819-3p/6877-3p   | 2 |
| <i>circMAML2</i> | miR-6820-5p           | 1 |
| <i>circMAML2</i> | miR-6822-3p           | 1 |
| <i>circMAML2</i> | miR-6823-5p           | 2 |

|                  |             |   |
|------------------|-------------|---|
| <i>circMAML2</i> | miR-6825-5p | 1 |
| <i>circMAML2</i> | miR-6828-3p | 1 |
| <i>circMAML2</i> | miR-6831-3p | 1 |
| <i>circMAML2</i> | miR-6833-5p | 1 |
| <i>circMAML2</i> | miR-6834-3p | 1 |
| <i>circMAML2</i> | miR-6836-3p | 1 |
| <i>circMAML2</i> | miR-6840-3p | 1 |
| <i>circMAML2</i> | miR-6841-3p | 3 |
| <i>circMAML2</i> | miR-6845-3p | 3 |
| <i>circMAML2</i> | miR-6847-5p | 1 |
| <i>circMAML2</i> | miR-6849-3p | 4 |
| <i>circMAML2</i> | miR-6850-3p | 1 |
| <i>circMAML2</i> | miR-6851-3p | 1 |
| <i>circMAML2</i> | miR-6852-5p | 1 |
| <i>circMAML2</i> | miR-6854-5p | 3 |
| <i>circMAML2</i> | miR-6857-5p | 1 |
| <i>circMAML2</i> | miR-6858-3p | 4 |
| <i>circMAML2</i> | miR-6861-3p | 1 |
| <i>circMAML2</i> | miR-6868-5p | 2 |
| <i>circMAML2</i> | miR-6871-3p | 3 |
| <i>circMAML2</i> | miR-6871-5p | 1 |
| <i>circMAML2</i> | miR-6872-3p | 2 |
| <i>circMAML2</i> | miR-6873-3p | 2 |
| <i>circMAML2</i> | miR-6874-5p | 1 |
| <i>circMAML2</i> | miR-6878-3p | 2 |
| <i>circMAML2</i> | miR-6878-5p | 1 |
| <i>circMAML2</i> | miR-6879-3p | 1 |
| <i>circMAML2</i> | miR-6881-5p | 1 |
| <i>circMAML2</i> | miR-6884-3p | 2 |
| <i>circMAML2</i> | miR-6885-3p | 1 |
| <i>circMAML2</i> | miR-6886-3p | 1 |
| <i>circMAML2</i> | miR-6887-3p | 2 |
| <i>circMAML2</i> | miR-6888-3p | 1 |
| <i>circMAML2</i> | miR-6888-5p | 2 |
| <i>circMAML2</i> | miR-6889-3p | 1 |
| <i>circMAML2</i> | miR-6892-3p | 2 |
| <i>circMAML2</i> | miR-6894-3p | 1 |
| <i>circMAML2</i> | miR-6895-5p | 1 |

|                  |              |   |
|------------------|--------------|---|
| <i>circMAML2</i> | miR-7-3p     | 1 |
| <i>circMAML2</i> | miR-7106-3p  | 1 |
| <i>circMAML2</i> | miR-7109-3p  | 3 |
| <i>circMAML2</i> | miR-7110-3p  | 1 |
| <i>circMAML2</i> | miR-7113-5p  | 2 |
| <i>circMAML2</i> | miR-7150     | 1 |
| <i>circMAML2</i> | miR-7152-3p  | 1 |
| <i>circMAML2</i> | miR-7155-5p  | 1 |
| <i>circMAML2</i> | miR-7156-3p  | 2 |
| <i>circMAML2</i> | miR-7158-3p  | 2 |
| <i>circMAML2</i> | miR-7158-5p  | 3 |
| <i>circMAML2</i> | miR-7159-5p  | 1 |
| <i>circMAML2</i> | miR-7160-3p  | 1 |
| <i>circMAML2</i> | miR-7160-5p  | 1 |
| <i>circMAML2</i> | miR-7162-3p  | 1 |
| <i>circMAML2</i> | miR-759      | 1 |
| <i>circMAML2</i> | miR-760      | 1 |
| <i>circMAML2</i> | miR-766-3p   | 1 |
| <i>circMAML2</i> | miR-767-5p   | 2 |
| <i>circMAML2</i> | miR-770-5p   | 2 |
| <i>circMAML2</i> | miR-7705     | 1 |
| <i>circMAML2</i> | miR-7845-5p  | 1 |
| <i>circMAML2</i> | miR-7973     | 1 |
| <i>circMAML2</i> | miR-7977     | 1 |
| <i>circMAML2</i> | miR-802      | 1 |
| <i>circMAML2</i> | miR-8062     | 1 |
| <i>circMAML2</i> | miR-8064     | 1 |
| <i>circMAML2</i> | miR-8077     | 1 |
| <i>circMAML2</i> | miR-8084     | 1 |
| <i>circMAML2</i> | miR-8087     | 1 |
| <i>circMAML2</i> | miR-873-3p   | 1 |
| <i>circMAML2</i> | miR-873-5p.1 | 3 |
| <i>circMAML2</i> | miR-873-5p.2 | 6 |
| <i>circMAML2</i> | miR-874-3p   | 2 |
| <i>circMAML2</i> | miR-874-5p   | 4 |
| <i>circMAML2</i> | miR-877-3p   | 1 |
| <i>circMAML2</i> | miR-885-3p   | 1 |
| <i>circMAML2</i> | miR-888-3p   | 1 |

|                   |                    |    |
|-------------------|--------------------|----|
| <i>circMAML2</i>  | miR-889-5p         | 2  |
| <i>circMAML2</i>  | miR-890            | 1  |
| <i>circMAML2</i>  | miR-892-5p         | 1  |
| <i>circMAML2</i>  | miR-892b           | 1  |
| <i>circMAML2</i>  | miR-9-3p           | 1  |
| <i>circMAML2</i>  | miR-921            | 1  |
| <i>circMAML2</i>  | miR-922            | 40 |
| <i>circMAML2</i>  | miR-92a-2-5p       | 1  |
| <i>circMAML2</i>  | miR-93-3p          | 1  |
| <i>circMAML2</i>  | miR-938            | 1  |
| <i>circMAML2</i>  | miR-939-3p         | 1  |
| <i>circMAML2</i>  | miR-939-5p/1343-5p | 1  |
| <i>circMAML2</i>  | miR-942-5p         | 1  |
| <i>circMAML2</i>  | miR-99-3p          | 1  |
| <i>circMAN1A2</i> | miR-101-5p         | 1  |
| <i>circMAN1A2</i> | miR-103a-2-5p      | 1  |
| <i>circMAN1A2</i> | miR-106a-3p        | 1  |
| <i>circMAN1A2</i> | miR-1206           | 1  |
| <i>circMAN1A2</i> | miR-122-5p         | 1  |
| <i>circMAN1A2</i> | miR-1224-3p        | 1  |
| <i>circMAN1A2</i> | miR-1231           | 1  |
| <i>circMAN1A2</i> | miR-1237-3p        | 1  |
| <i>circMAN1A2</i> | miR-1238-3p        | 1  |
| <i>circMAN1A2</i> | miR-1245b-5p       | 4  |
| <i>circMAN1A2</i> | miR-1248           | 1  |
| <i>circMAN1A2</i> | miR-1258           | 1  |
| <i>circMAN1A2</i> | miR-1269           | 1  |
| <i>circMAN1A2</i> | miR-1283           | 1  |
| <i>circMAN1A2</i> | miR-1288-3p        | 1  |
| <i>circMAN1A2</i> | miR-130b-5p        | 2  |
| <i>circMAN1A2</i> | miR-135a-3p        | 1  |
| <i>circMAN1A2</i> | miR-141-5p         | 1  |
| <i>circMAN1A2</i> | miR-153-5p         | 1  |
| <i>circMAN1A2</i> | miR-155-3p         | 1  |
| <i>circMAN1A2</i> | miR-183-3p         | 3  |
| <i>circMAN1A2</i> | miR-185-3p         | 1  |
| <i>circMAN1A2</i> | miR-1915-5p        | 1  |
| <i>circMAN1A2</i> | miR-193a-5p        | 1  |

|                   |                           |   |
|-------------------|---------------------------|---|
| <i>circMAN1A2</i> | miR-194-3p                | 1 |
| <i>circMAN1A2</i> | miR-202-5p                | 1 |
| <i>circMAN1A2</i> | miR-203b-3p               | 1 |
| <i>circMAN1A2</i> | miR-204-5p/211-5p         | 1 |
| <i>circMAN1A2</i> | miR-2113                  | 1 |
| <i>circMAN1A2</i> | miR-2114-5p               | 1 |
| <i>circMAN1A2</i> | miR-2117                  | 1 |
| <i>circMAN1A2</i> | miR-2355-5p               | 1 |
| <i>circMAN1A2</i> | miR-2681-3p               | 1 |
| <i>circMAN1A2</i> | miR-29-3p                 | 1 |
| <i>circMAN1A2</i> | miR-2909                  | 1 |
| <i>circMAN1A2</i> | miR-302b-5p/302d-5p       | 2 |
| <i>circMAN1A2</i> | miR-3120-5p               | 1 |
| <i>circMAN1A2</i> | miR-3122/3913-5p          | 1 |
| <i>circMAN1A2</i> | miR-3124-3p               | 1 |
| <i>circMAN1A2</i> | miR-3147                  | 1 |
| <i>circMAN1A2</i> | miR-3162-5p               | 1 |
| <i>circMAN1A2</i> | miR-3175                  | 1 |
| <i>circMAN1A2</i> | miR-3182                  | 1 |
| <i>circMAN1A2</i> | miR-3183/4723-3p/6769b-3p | 3 |
| <i>circMAN1A2</i> | miR-3191-5p               | 1 |
| <i>circMAN1A2</i> | miR-3199/8052             | 1 |
| <i>circMAN1A2</i> | miR-323b-5p/410-5p/494-5p | 1 |
| <i>circMAN1A2</i> | miR-330-3p                | 1 |
| <i>circMAN1A2</i> | miR-330-3p.2              | 1 |
| <i>circMAN1A2</i> | miR-337-3p                | 1 |
| <i>circMAN1A2</i> | miR-34-5p/449-5p          | 1 |
| <i>circMAN1A2</i> | miR-340-5p                | 1 |
| <i>circMAN1A2</i> | miR-34a-3p                | 1 |
| <i>circMAN1A2</i> | miR-3611                  | 1 |
| <i>circMAN1A2</i> | miR-3617-3p               | 1 |
| <i>circMAN1A2</i> | miR-3657                  | 1 |
| <i>circMAN1A2</i> | miR-3659                  | 1 |
| <i>circMAN1A2</i> | miR-365a-5p/365b-5p       | 1 |
| <i>circMAN1A2</i> | miR-3675-3p               | 1 |
| <i>circMAN1A2</i> | miR-3677-5p               | 1 |
| <i>circMAN1A2</i> | miR-3685                  | 1 |
| <i>circMAN1A2</i> | miR-3688-5p               | 1 |

|                   |                       |   |
|-------------------|-----------------------|---|
| <i>circMAN1A2</i> | miR-3713              | 1 |
| <i>circMAN1A2</i> | miR-383-5p.1          | 1 |
| <i>circMAN1A2</i> | miR-384               | 1 |
| <i>circMAN1A2</i> | miR-3922-5p           | 1 |
| <i>circMAN1A2</i> | miR-3977              | 1 |
| <i>circMAN1A2</i> | miR-410-3p            | 1 |
| <i>circMAN1A2</i> | miR-4273/7156-5p      | 1 |
| <i>circMAN1A2</i> | miR-4278              | 1 |
| <i>circMAN1A2</i> | miR-4286              | 1 |
| <i>circMAN1A2</i> | miR-4297/5581-5p      | 1 |
| <i>circMAN1A2</i> | miR-4299              | 1 |
| <i>circMAN1A2</i> | miR-4303              | 1 |
| <i>circMAN1A2</i> | miR-4307              | 1 |
| <i>circMAN1A2</i> | miR-4314              | 1 |
| <i>circMAN1A2</i> | miR-432-5p            | 1 |
| <i>circMAN1A2</i> | miR-433-3p            | 2 |
| <i>circMAN1A2</i> | miR-4330              | 1 |
| <i>circMAN1A2</i> | miR-4422              | 1 |
| <i>circMAN1A2</i> | miR-4425              | 1 |
| <i>circMAN1A2</i> | miR-4427              | 3 |
| <i>circMAN1A2</i> | miR-4433a-5p          | 1 |
| <i>circMAN1A2</i> | miR-4433b-5p          | 1 |
| <i>circMAN1A2</i> | miR-4446-5p           | 1 |
| <i>circMAN1A2</i> | miR-4452              | 3 |
| <i>circMAN1A2</i> | miR-4456              | 1 |
| <i>circMAN1A2</i> | miR-450a-1-3p         | 1 |
| <i>circMAN1A2</i> | miR-4515              | 1 |
| <i>circMAN1A2</i> | miR-4517              | 3 |
| <i>circMAN1A2</i> | miR-452-3p            | 1 |
| <i>circMAN1A2</i> | miR-4520-2-3p         | 1 |
| <i>circMAN1A2</i> | miR-4527/6503-5p      | 1 |
| <i>circMAN1A2</i> | miR-4528              | 2 |
| <i>circMAN1A2</i> | miR-4529-3p           | 1 |
| <i>circMAN1A2</i> | miR-4641              | 1 |
| <i>circMAN1A2</i> | miR-4659a-3p/4659b-3p | 1 |
| <i>circMAN1A2</i> | miR-4669              | 1 |
| <i>circMAN1A2</i> | miR-4677-5p           | 1 |
| <i>circMAN1A2</i> | miR-4680-3p           | 3 |

|                   |                     |   |
|-------------------|---------------------|---|
| <i>circMAN1A2</i> | miR-4682            | 1 |
| <i>circMAN1A2</i> | miR-4724-3p         | 1 |
| <i>circMAN1A2</i> | miR-4724-5p         | 1 |
| <i>circMAN1A2</i> | miR-4733-5p         | 2 |
| <i>circMAN1A2</i> | miR-4740-5p         | 1 |
| <i>circMAN1A2</i> | miR-4753-3p         | 4 |
| <i>circMAN1A2</i> | miR-4753-5p         | 1 |
| <i>circMAN1A2</i> | miR-4755-5p/5006-3p | 1 |
| <i>circMAN1A2</i> | miR-4760-3p         | 3 |
| <i>circMAN1A2</i> | miR-4761-5p         | 2 |
| <i>circMAN1A2</i> | miR-4766-5p         | 1 |
| <i>circMAN1A2</i> | miR-4768-5p/6833-3p | 3 |
| <i>circMAN1A2</i> | miR-4772-5p         | 1 |
| <i>circMAN1A2</i> | miR-4775            | 2 |
| <i>circMAN1A2</i> | miR-4778-3p         | 1 |
| <i>circMAN1A2</i> | miR-4796-3p         | 1 |
| <i>circMAN1A2</i> | miR-5000-5p         | 1 |
| <i>circMAN1A2</i> | miR-5009-5p/8058    | 1 |
| <i>circMAN1A2</i> | miR-500b-3p         | 2 |
| <i>circMAN1A2</i> | miR-5010-3p         | 1 |
| <i>circMAN1A2</i> | miR-502-5p          | 1 |
| <i>circMAN1A2</i> | miR-503-3p          | 1 |
| <i>circMAN1A2</i> | miR-511-5p          | 1 |
| <i>circMAN1A2</i> | miR-515-5p/519e-5p  | 1 |
| <i>circMAN1A2</i> | miR-5187-3p         | 3 |
| <i>circMAN1A2</i> | miR-526b-5p         | 2 |
| <i>circMAN1A2</i> | miR-544a            | 1 |
| <i>circMAN1A2</i> | miR-548au-3p        | 1 |
| <i>circMAN1A2</i> | miR-548q            | 1 |
| <i>circMAN1A2</i> | miR-551b-5p         | 1 |
| <i>circMAN1A2</i> | miR-5579-5p         | 1 |
| <i>circMAN1A2</i> | miR-5583-3p         | 3 |
| <i>circMAN1A2</i> | miR-5588-3p         | 1 |
| <i>circMAN1A2</i> | miR-561-5p          | 1 |
| <i>circMAN1A2</i> | miR-5682            | 1 |
| <i>circMAN1A2</i> | miR-5693            | 1 |
| <i>circMAN1A2</i> | miR-5696            | 1 |
| <i>circMAN1A2</i> | miR-573/3616-5p     | 1 |

|                   |                     |   |
|-------------------|---------------------|---|
| <i>circMAN1A2</i> | miR-574-5p          | 1 |
| <i>circMAN1A2</i> | miR-578             | 1 |
| <i>circMAN1A2</i> | miR-579-3p          | 1 |
| <i>circMAN1A2</i> | miR-584-5p          | 1 |
| <i>circMAN1A2</i> | miR-585-5p          | 1 |
| <i>circMAN1A2</i> | miR-590-3p          | 3 |
| <i>circMAN1A2</i> | miR-6071            | 1 |
| <i>circMAN1A2</i> | miR-616-3p          | 1 |
| <i>circMAN1A2</i> | miR-623             | 1 |
| <i>circMAN1A2</i> | miR-624-3p          | 1 |
| <i>circMAN1A2</i> | miR-627-3p          | 2 |
| <i>circMAN1A2</i> | miR-630             | 1 |
| <i>circMAN1A2</i> | miR-632/4288        | 1 |
| <i>circMAN1A2</i> | miR-6499-3p         | 1 |
| <i>circMAN1A2</i> | miR-6503-3p         | 1 |
| <i>circMAN1A2</i> | miR-6513-5p         | 1 |
| <i>circMAN1A2</i> | miR-660-5p          | 2 |
| <i>circMAN1A2</i> | miR-664a-3p         | 1 |
| <i>circMAN1A2</i> | miR-670-3p          | 1 |
| <i>circMAN1A2</i> | miR-6716-5p         | 1 |
| <i>circMAN1A2</i> | miR-6736-3p         | 1 |
| <i>circMAN1A2</i> | miR-6738-3p         | 1 |
| <i>circMAN1A2</i> | miR-6739-3p         | 1 |
| <i>circMAN1A2</i> | miR-6740-3p         | 1 |
| <i>circMAN1A2</i> | miR-6753-3p/7107-3p | 1 |
| <i>circMAN1A2</i> | miR-6755-3p         | 1 |
| <i>circMAN1A2</i> | miR-6755-5p         | 1 |
| <i>circMAN1A2</i> | miR-6757-3p         | 1 |
| <i>circMAN1A2</i> | miR-676-3p          | 2 |
| <i>circMAN1A2</i> | miR-676-5p          | 2 |
| <i>circMAN1A2</i> | miR-6776-5p         | 1 |
| <i>circMAN1A2</i> | miR-6780a-3p        | 3 |
| <i>circMAN1A2</i> | miR-6783-5p         | 1 |
| <i>circMAN1A2</i> | miR-6789-5p         | 1 |
| <i>circMAN1A2</i> | miR-6809-3p         | 3 |
| <i>circMAN1A2</i> | miR-6814-5p         | 2 |
| <i>circMAN1A2</i> | miR-6817-3p         | 2 |
| <i>circMAN1A2</i> | miR-6824-5p         | 1 |



|                   |                    |   |
|-------------------|--------------------|---|
| <i>circMAN1A2</i> | miR-6825-5p        | 1 |
| <i>circMAN1A2</i> | miR-6826-5p        | 1 |
| <i>circMAN1A2</i> | miR-6827-5p        | 1 |
| <i>circMAN1A2</i> | miR-6828-3p        | 1 |
| <i>circMAN1A2</i> | miR-6832-3p        | 1 |
| <i>circMAN1A2</i> | miR-6834-3p        | 2 |
| <i>circMAN1A2</i> | miR-6841-3p        | 1 |
| <i>circMAN1A2</i> | miR-6841-5p        | 1 |
| <i>circMAN1A2</i> | miR-6844           | 1 |
| <i>circMAN1A2</i> | miR-6853-3p        | 1 |
| <i>circMAN1A2</i> | miR-6861-5p        | 1 |
| <i>circMAN1A2</i> | miR-6871-3p        | 1 |
| <i>circMAN1A2</i> | miR-6873-3p        | 1 |
| <i>circMAN1A2</i> | miR-6875-3p        | 1 |
| <i>circMAN1A2</i> | miR-6881-3p        | 3 |
| <i>circMAN1A2</i> | miR-6885-3p        | 1 |
| <i>circMAN1A2</i> | miR-6888-3p        | 1 |
| <i>circMAN1A2</i> | miR-7110-3p        | 2 |
| <i>circMAN1A2</i> | miR-7111-3p        | 3 |
| <i>circMAN1A2</i> | miR-7150           | 1 |
| <i>circMAN1A2</i> | miR-7151-5p        | 1 |
| <i>circMAN1A2</i> | miR-7154-5p        | 2 |
| <i>circMAN1A2</i> | miR-7158-3p        | 1 |
| <i>circMAN1A2</i> | miR-758-3p         | 1 |
| <i>circMAN1A2</i> | miR-767-3p         | 1 |
| <i>circMAN1A2</i> | miR-7845-5p        | 1 |
| <i>circMAN1A2</i> | miR-7978           | 1 |
| <i>circMAN1A2</i> | miR-8060           | 1 |
| <i>circMAN1A2</i> | miR-887-5p         | 1 |
| <i>circMAN1A2</i> | miR-891a-3p        | 1 |
| <i>circMAN1A2</i> | miR-92a-1-5p       | 1 |
| <i>circMAN1A2</i> | miR-939-5p/1343-5p | 1 |
| <i>circMAN1A2</i> | miR-942-5p         | 3 |
| <i>circMAN1A2</i> | miR-96-3p          | 1 |
| <i>circMAN1A2</i> | miR-1200           | 2 |
| <i>circMAN1A2</i> | miR-124-5p         | 1 |
| <i>circMAN1A2</i> | miR-1295a          | 3 |
| <i>circMAN1A2</i> | miR-1324           | 2 |

|                   |                     |   |
|-------------------|---------------------|---|
| <i>circMAN1A2</i> | miR-1976            | 2 |
| <i>circMAN1A2</i> | miR-2276-3p         | 3 |
| <i>circMAN1A2</i> | miR-301a-5p/301b-5p | 2 |
| <i>circMAN1A2</i> | miR-323b-3p         | 3 |
| <i>circMAN1A2</i> | miR-331-5p          | 2 |
| <i>circMAN1A2</i> | miR-33a-3p          | 3 |
| <i>circMAN1A2</i> | miR-3653-5p         | 2 |
| <i>circMAN1A2</i> | miR-377-3p          | 1 |
| <i>circMAN1A2</i> | miR-378a-5p         | 2 |
| <i>circMAN1A2</i> | miR-3921/4653-5p    | 2 |
| <i>circMAN1A2</i> | miR-409-3p          | 2 |
| <i>circMAN1A2</i> | miR-4279            | 3 |
| <i>circMAN1A2</i> | miR-4728-3p         | 3 |
| <i>circMAN1A2</i> | miR-4757-5p/6744-3p | 3 |
| <i>circMAN1A2</i> | miR-4772-3p         | 3 |
| <i>circMAN1A2</i> | miR-4781-3p         | 2 |
| <i>circMAN1A2</i> | miR-491-3p          | 1 |
| <i>circMAN1A2</i> | miR-519d-5p         | 3 |
| <i>circMAN1A2</i> | miR-5571-5p         | 1 |
| <i>circMAN1A2</i> | miR-562             | 3 |
| <i>circMAN1A2</i> | miR-5695            | 3 |
| <i>circMAN1A2</i> | miR-5697            | 3 |
| <i>circMAN1A2</i> | miR-5704            | 3 |
| <i>circMAN1A2</i> | miR-607             | 3 |
| <i>circMAN1A2</i> | miR-617             | 2 |
| <i>circMAN1A2</i> | miR-629-3p          | 1 |
| <i>circMAN1A2</i> | miR-6505-3p         | 2 |
| <i>circMAN1A2</i> | miR-6715b-3p        | 2 |
| <i>circMAN1A2</i> | miR-6768-5p         | 2 |
| <i>circMAN1A2</i> | miR-6778-3p         | 3 |
| <i>circMAN1A2</i> | miR-6791-3p/6829-3p | 3 |
| <i>circMAN1A2</i> | miR-6800-3p         | 2 |
| <i>circMAN1A2</i> | miR-6806-5p         | 3 |
| <i>circMAN1A2</i> | miR-6845-3p         | 2 |
| <i>circMAN1A2</i> | miR-889-3p          | 2 |
| <i>circMAN1A2</i> | miR-95-5p           | 3 |
| <i>circMAN1A2</i> | miR-1207-5p/4763-3p | 1 |
| <i>circMAN1A2</i> | miR-124-3p.1        | 1 |

|                   |                                     |   |
|-------------------|-------------------------------------|---|
| <i>circMAN1A2</i> | miR-1252-5p                         | 1 |
| <i>circMAN1A2</i> | miR-1286                            | 1 |
| <i>circMAN1A2</i> | miR-1305                            | 1 |
| <i>circMAN1A2</i> | miR-1910-3p/6511a-5p                | 1 |
| <i>circMAN1A2</i> | miR-197-3p                          | 1 |
| <i>circMAN1A2</i> | miR-199-3p                          | 1 |
| <i>circMAN1A2</i> | miR-2053                            | 1 |
| <i>circMAN1A2</i> | miR-25-3p/32-5p/92-3p/363-3p/367-3p | 1 |
| <i>circMAN1A2</i> | miR-302f                            | 1 |
| <i>circMAN1A2</i> | miR-3152-3p                         | 1 |
| <i>circMAN1A2</i> | miR-3157-5p                         | 1 |
| <i>circMAN1A2</i> | miR-3173-3p/6891-5p                 | 1 |
| <i>circMAN1A2</i> | miR-3202                            | 1 |
| <i>circMAN1A2</i> | miR-335-3p                          | 1 |
| <i>circMAN1A2</i> | miR-34b-5p/449c-5p                  | 1 |
| <i>circMAN1A2</i> | miR-3650                            | 1 |
| <i>circMAN1A2</i> | miR-3671                            | 1 |
| <i>circMAN1A2</i> | miR-3714                            | 1 |
| <i>circMAN1A2</i> | miR-3910                            | 1 |
| <i>circMAN1A2</i> | miR-4317                            | 1 |
| <i>circMAN1A2</i> | miR-4325                            | 1 |
| <i>circMAN1A2</i> | miR-4428                            | 1 |
| <i>circMAN1A2</i> | miR-4433b-3p                        | 1 |
| <i>circMAN1A2</i> | miR-4476/6876-5p                    | 1 |
| <i>circMAN1A2</i> | miR-4484                            | 1 |
| <i>circMAN1A2</i> | miR-4533                            | 1 |
| <i>circMAN1A2</i> | miR-4635                            | 1 |
| <i>circMAN1A2</i> | miR-4653-3p                         | 1 |
| <i>circMAN1A2</i> | miR-4691-3p                         | 1 |
| <i>circMAN1A2</i> | miR-4722-5p                         | 1 |
| <i>circMAN1A2</i> | miR-4736                            | 1 |
| <i>circMAN1A2</i> | miR-548an                           | 1 |
| <i>circMAN1A2</i> | miR-5585-3p                         | 1 |
| <i>circMAN1A2</i> | miR-651-3p                          | 1 |
| <i>circMAN1A2</i> | miR-6512-5p                         | 1 |
| <i>circMAN1A2</i> | miR-665                             | 1 |
| <i>circMAN1A2</i> | miR-6768-3p                         | 1 |
| <i>circMAN1A2</i> | miR-6787-3p                         | 1 |

|                   |                         |   |
|-------------------|-------------------------|---|
| <i>circMAN1A2</i> | miR-6800-5p             | 1 |
| <i>circMAN1A2</i> | miR-6802-5p             | 1 |
| <i>circMAN1A2</i> | miR-6830-5p             | 1 |
| <i>circMAN1A2</i> | miR-6867-5p             | 1 |
| <i>circMAN1A2</i> | miR-6890-3p             | 1 |
| <i>circMAN1A2</i> | miR-7703                | 1 |
| <i>circMAN1A2</i> | miR-7977                | 1 |
| <i>circMAN1A2</i> | miR-873-5p.1            | 1 |
| <i>circMAN1A2</i> | miR-873-5p.2            | 1 |
| <i>circMAN1A2</i> | miR-936                 | 1 |
| <i>circMAN1A2</i> | miR-940/6808-5p/6893-5p | 1 |
| <i>circMAN2A1</i> | miR-1-3p/206            | 1 |
| <i>circMAN2A1</i> | miR-105-5p              | 1 |
| <i>circMAN2A1</i> | miR-1183                | 3 |
| <i>circMAN2A1</i> | miR-1184                | 1 |
| <i>circMAN2A1</i> | miR-1205                | 1 |
| <i>circMAN2A1</i> | miR-1225-3p             | 1 |
| <i>circMAN2A1</i> | miR-1226-5p             | 2 |
| <i>circMAN2A1</i> | miR-1251-3p             | 3 |
| <i>circMAN2A1</i> | miR-126-5p              | 2 |
| <i>circMAN2A1</i> | miR-127-5p              | 3 |
| <i>circMAN2A1</i> | miR-1273f               | 1 |
| <i>circMAN2A1</i> | miR-1285-5p             | 4 |
| <i>circMAN2A1</i> | miR-1294                | 3 |
| <i>circMAN2A1</i> | miR-1298-3p             | 1 |
| <i>circMAN2A1</i> | miR-1299                | 3 |
| <i>circMAN2A1</i> | miR-1304-3p             | 2 |
| <i>circMAN2A1</i> | miR-1324                | 1 |
| <i>circMAN2A1</i> | miR-134-5p              | 1 |
| <i>circMAN2A1</i> | miR-138-2-3p            | 1 |
| <i>circMAN2A1</i> | miR-140-3p.1            | 2 |
| <i>circMAN2A1</i> | miR-140-3p.2            | 2 |
| <i>circMAN2A1</i> | miR-143-3p              | 1 |
| <i>circMAN2A1</i> | miR-143-5p              | 3 |
| <i>circMAN2A1</i> | miR-151-3p              | 2 |
| <i>circMAN2A1</i> | miR-17-3p               | 1 |
| <i>circMAN2A1</i> | miR-1827                | 1 |
| <i>circMAN2A1</i> | miR-183-3p              | 2 |

|                   |                    |   |
|-------------------|--------------------|---|
| <i>circMAN2A1</i> | miR-186-5p         | 2 |
| <i>circMAN2A1</i> | miR-1915-5p        | 1 |
| <i>circMAN2A1</i> | miR-203b-3p        | 4 |
| <i>circMAN2A1</i> | miR-2113           | 4 |
| <i>circMAN2A1</i> | miR-2115-5p        | 1 |
| <i>circMAN2A1</i> | miR-212-5p         | 3 |
| <i>circMAN2A1</i> | miR-219-5p         | 1 |
| <i>circMAN2A1</i> | miR-219a-2-3p      | 1 |
| <i>circMAN2A1</i> | miR-219b-3p        | 1 |
| <i>circMAN2A1</i> | miR-29-3p          | 1 |
| <i>circMAN2A1</i> | miR-298            | 2 |
| <i>circMAN2A1</i> | miR-29b-1-5p       | 3 |
| <i>circMAN2A1</i> | miR-30-5p          | 2 |
| <i>circMAN2A1</i> | miR-302f           | 3 |
| <i>circMAN2A1</i> | miR-3065-3p        | 2 |
| <i>circMAN2A1</i> | miR-3115           | 1 |
| <i>circMAN2A1</i> | miR-3126-3p        | 1 |
| <i>circMAN2A1</i> | miR-3126-5p        | 2 |
| <i>circMAN2A1</i> | miR-3130-3p        | 1 |
| <i>circMAN2A1</i> | miR-3133           | 2 |
| <i>circMAN2A1</i> | miR-3136-5p/4439   | 1 |
| <i>circMAN2A1</i> | miR-3145-5p        | 3 |
| <i>circMAN2A1</i> | miR-3158-5p        | 1 |
| <i>circMAN2A1</i> | miR-3164           | 1 |
| <i>circMAN2A1</i> | miR-3179           | 2 |
| <i>circMAN2A1</i> | miR-3189-3p        | 3 |
| <i>circMAN2A1</i> | miR-3194-5p        | 1 |
| <i>circMAN2A1</i> | miR-3200-3p        | 2 |
| <i>circMAN2A1</i> | miR-3200-5p        | 2 |
| <i>circMAN2A1</i> | miR-338-3p         | 2 |
| <i>circMAN2A1</i> | miR-346            | 1 |
| <i>circMAN2A1</i> | miR-3607-3p        | 6 |
| <i>circMAN2A1</i> | miR-3611           | 3 |
| <i>circMAN2A1</i> | miR-3616-3p        | 1 |
| <i>circMAN2A1</i> | miR-3619-3p        | 2 |
| <i>circMAN2A1</i> | miR-362-5p/500b-5p | 4 |
| <i>circMAN2A1</i> | miR-3622a-5p       | 2 |
| <i>circMAN2A1</i> | miR-3657           | 2 |

|                   |                                              |   |
|-------------------|----------------------------------------------|---|
| <i>circMAN2A1</i> | miR-3671                                     | 3 |
| <i>circMAN2A1</i> | miR-3680-5p                                  | 2 |
| <i>circMAN2A1</i> | miR-3682-3p                                  | 2 |
| <i>circMAN2A1</i> | miR-3692-3p                                  | 2 |
| <i>circMAN2A1</i> | miR-371-5p                                   | 1 |
| <i>circMAN2A1</i> | miR-371b-5p/373-5p/616-5p                    | 1 |
| <i>circMAN2A1</i> | miR-372-5p                                   | 1 |
| <i>circMAN2A1</i> | miR-376a-2-5p                                | 1 |
| <i>circMAN2A1</i> | miR-376a-5p                                  | 1 |
| <i>circMAN2A1</i> | miR-378j/6839-5p                             | 3 |
| <i>circMAN2A1</i> | miR-383-3p                                   | 2 |
| <i>circMAN2A1</i> | miR-3936                                     | 1 |
| <i>circMAN2A1</i> | miR-3977                                     | 2 |
| <i>circMAN2A1</i> | miR-4251                                     | 3 |
| <i>circMAN2A1</i> | miR-4276                                     | 2 |
| <i>circMAN2A1</i> | miR-4302                                     | 2 |
| <i>circMAN2A1</i> | miR-4316                                     | 3 |
| <i>circMAN2A1</i> | miR-4329                                     | 3 |
| <i>circMAN2A1</i> | miR-4419a/4510/6127/6129/6130/6133           | 2 |
| <i>circMAN2A1</i> | miR-4426/4647/4662b                          | 2 |
| <i>circMAN2A1</i> | miR-4427                                     | 2 |
| <i>circMAN2A1</i> | miR-4432                                     | 1 |
| <i>circMAN2A1</i> | miR-4433a-5p                                 | 3 |
| <i>circMAN2A1</i> | miR-4433b-5p                                 | 1 |
| <i>circMAN2A1</i> | miR-4436b-3p/4632-5p/6735-5p/6879-5p/7843-5p | 2 |
| <i>circMAN2A1</i> | miR-4436b-5p                                 | 2 |
| <i>circMAN2A1</i> | miR-4445-5p                                  | 1 |
| <i>circMAN2A1</i> | miR-4452                                     | 2 |
| <i>circMAN2A1</i> | miR-4463                                     | 2 |
| <i>circMAN2A1</i> | miR-4494                                     | 2 |
| <i>circMAN2A1</i> | miR-4499                                     | 2 |
| <i>circMAN2A1</i> | miR-4501                                     | 4 |
| <i>circMAN2A1</i> | miR-4513/6855-3p                             | 3 |
| <i>circMAN2A1</i> | miR-4524b-3p                                 | 1 |
| <i>circMAN2A1</i> | miR-4528                                     | 1 |
| <i>circMAN2A1</i> | miR-4530                                     | 2 |
| <i>circMAN2A1</i> | miR-455-3p.2                                 | 3 |
| <i>circMAN2A1</i> | miR-4635                                     | 3 |

|                   |                             |   |
|-------------------|-----------------------------|---|
| <i>circMAN2A1</i> | miR-4645-3p                 | 1 |
| <i>circMAN2A1</i> | miR-4669                    | 2 |
| <i>circMAN2A1</i> | miR-4680-3p                 | 2 |
| <i>circMAN2A1</i> | miR-4682                    | 3 |
| <i>circMAN2A1</i> | miR-4684-5p                 | 3 |
| <i>circMAN2A1</i> | miR-4686                    | 3 |
| <i>circMAN2A1</i> | miR-4691-5p/6792-3p         | 2 |
| <i>circMAN2A1</i> | miR-4694-3p                 | 1 |
| <i>circMAN2A1</i> | miR-4695-3p                 | 3 |
| <i>circMAN2A1</i> | miR-4699-5p                 | 2 |
| <i>circMAN2A1</i> | miR-4708-5p                 | 1 |
| <i>circMAN2A1</i> | miR-4719                    | 2 |
| <i>circMAN2A1</i> | miR-4721                    | 1 |
| <i>circMAN2A1</i> | miR-4760-5p/8061            | 1 |
| <i>circMAN2A1</i> | miR-4761-3p                 | 2 |
| <i>circMAN2A1</i> | miR-4762-5p                 | 3 |
| <i>circMAN2A1</i> | miR-4766-3p                 | 1 |
| <i>circMAN2A1</i> | miR-4766-5p                 | 2 |
| <i>circMAN2A1</i> | miR-4782-5p/5706            | 3 |
| <i>circMAN2A1</i> | miR-4793-3p                 | 1 |
| <i>circMAN2A1</i> | miR-4793-5p                 | 2 |
| <i>circMAN2A1</i> | miR-4796-5p                 | 1 |
| <i>circMAN2A1</i> | miR-4798-3p                 | 2 |
| <i>circMAN2A1</i> | miR-499b-5p                 | 2 |
| <i>circMAN2A1</i> | miR-5003-3p                 | 4 |
| <i>circMAN2A1</i> | miR-500a-5p                 | 3 |
| <i>circMAN2A1</i> | miR-501-5p                  | 4 |
| <i>circMAN2A1</i> | miR-5010-3p                 | 4 |
| <i>circMAN2A1</i> | miR-502-5p                  | 2 |
| <i>circMAN2A1</i> | miR-505-3p.1                | 1 |
| <i>circMAN2A1</i> | miR-508-3p                  | 1 |
| <i>circMAN2A1</i> | miR-508-5p                  | 3 |
| <i>circMAN2A1</i> | miR-513b-3p                 | 1 |
| <i>circMAN2A1</i> | miR-516a-3p/516b-3p/7162-5p | 1 |
| <i>circMAN2A1</i> | miR-516b-5p                 | 3 |
| <i>circMAN2A1</i> | miR-5187-3p                 | 2 |
| <i>circMAN2A1</i> | miR-5196-3p                 | 2 |
| <i>circMAN2A1</i> | miR-5197-3p                 | 4 |

|                   |                  |   |
|-------------------|------------------|---|
| <i>circMAN2A1</i> | miR-519d-5p      | 5 |
| <i>circMAN2A1</i> | miR-520f-5p      | 2 |
| <i>circMAN2A1</i> | miR-522-3p       | 1 |
| <i>circMAN2A1</i> | miR-541-5p       | 3 |
| <i>circMAN2A1</i> | miR-548p         | 2 |
| <i>circMAN2A1</i> | miR-548u/7161-5p | 1 |
| <i>circMAN2A1</i> | miR-5582-5p      | 2 |
| <i>circMAN2A1</i> | miR-5589-3p      | 3 |
| <i>circMAN2A1</i> | miR-5680         | 3 |
| <i>circMAN2A1</i> | miR-5690         | 2 |
| <i>circMAN2A1</i> | miR-5695         | 5 |
| <i>circMAN2A1</i> | miR-574-3p       | 1 |
| <i>circMAN2A1</i> | miR-575/4676-5p  | 2 |
| <i>circMAN2A1</i> | miR-576-3p       | 1 |
| <i>circMAN2A1</i> | miR-578          | 1 |
| <i>circMAN2A1</i> | miR-591          | 3 |
| <i>circMAN2A1</i> | miR-593-3p       | 4 |
| <i>circMAN2A1</i> | miR-593-5p       | 2 |
| <i>circMAN2A1</i> | miR-597-5p       | 2 |
| <i>circMAN2A1</i> | miR-601          | 1 |
| <i>circMAN2A1</i> | miR-605-5p       | 5 |
| <i>circMAN2A1</i> | miR-6126         | 1 |
| <i>circMAN2A1</i> | miR-617          | 2 |
| <i>circMAN2A1</i> | miR-621          | 1 |
| <i>circMAN2A1</i> | miR-622          | 2 |
| <i>circMAN2A1</i> | miR-627-3p       | 2 |
| <i>circMAN2A1</i> | miR-627-5p       | 3 |
| <i>circMAN2A1</i> | miR-647          | 1 |
| <i>circMAN2A1</i> | miR-6499-3p      | 2 |
| <i>circMAN2A1</i> | miR-6505-3p      | 2 |
| <i>circMAN2A1</i> | miR-6509-3p      | 2 |
| <i>circMAN2A1</i> | miR-664a-3p      | 3 |
| <i>circMAN2A1</i> | miR-6716-5p      | 1 |
| <i>circMAN2A1</i> | miR-6721-5p      | 1 |
| <i>circMAN2A1</i> | miR-6733-3p      | 2 |
| <i>circMAN2A1</i> | miR-6734-5p      | 2 |
| <i>circMAN2A1</i> | miR-6749-3p      | 2 |
| <i>circMAN2A1</i> | miR-6757-5p      | 3 |



|                   |                     |   |
|-------------------|---------------------|---|
| <i>circMAN2A1</i> | miR-6758-3p         | 1 |
| <i>circMAN2A1</i> | miR-6761-5p         | 3 |
| <i>circMAN2A1</i> | miR-6765-5p         | 1 |
| <i>circMAN2A1</i> | miR-6776-5p         | 1 |
| <i>circMAN2A1</i> | miR-6782-5p         | 1 |
| <i>circMAN2A1</i> | miR-6787-3p         | 2 |
| <i>circMAN2A1</i> | miR-6794-3p         | 3 |
| <i>circMAN2A1</i> | miR-6804-3p         | 1 |
| <i>circMAN2A1</i> | miR-6807-5p         | 1 |
| <i>circMAN2A1</i> | miR-6808-3p         | 2 |
| <i>circMAN2A1</i> | miR-6813-3p         | 2 |
| <i>circMAN2A1</i> | miR-6827-5p         | 1 |
| <i>circMAN2A1</i> | miR-6834-5p         | 2 |
| <i>circMAN2A1</i> | miR-6841-3p         | 1 |
| <i>circMAN2A1</i> | miR-6842-3p         | 1 |
| <i>circMAN2A1</i> | miR-6843-3p/6848-3p | 1 |
| <i>circMAN2A1</i> | miR-6857-3p         | 3 |
| <i>circMAN2A1</i> | miR-6858-3p         | 2 |
| <i>circMAN2A1</i> | miR-6861-5p         | 1 |
| <i>circMAN2A1</i> | miR-6864-5p         | 1 |
| <i>circMAN2A1</i> | miR-6871-3p         | 1 |
| <i>circMAN2A1</i> | miR-6871-5p         | 1 |
| <i>circMAN2A1</i> | miR-6873-5p         | 1 |
| <i>circMAN2A1</i> | miR-6895-3p         | 4 |
| <i>circMAN2A1</i> | miR-7158-3p         | 4 |
| <i>circMAN2A1</i> | miR-7515            | 2 |
| <i>circMAN2A1</i> | miR-758-3p          | 7 |
| <i>circMAN2A1</i> | miR-7641            | 2 |
| <i>circMAN2A1</i> | miR-767-5p          | 2 |
| <i>circMAN2A1</i> | miR-770-5p          | 2 |
| <i>circMAN2A1</i> | miR-7702            | 1 |
| <i>circMAN2A1</i> | miR-7843-3p         | 3 |
| <i>circMAN2A1</i> | miR-8055            | 1 |
| <i>circMAN2A1</i> | miR-8087            | 1 |
| <i>circMAN2A1</i> | miR-888-5p          | 1 |
| <i>circMAN2A1</i> | miR-889-3p          | 2 |
| <i>circMAN2A1</i> | miR-924             | 3 |
| <i>circMAN2A1</i> | miR-937-5p          | 3 |

|                   |                       |   |
|-------------------|-----------------------|---|
| <i>circMAN2A1</i> | miR-943               | 1 |
| <i>circMAN2A1</i> | miR-1224-3p           | 1 |
| <i>circMAN2A1</i> | miR-1237-3p           | 3 |
| <i>circMAN2A1</i> | miR-1238-3p           | 2 |
| <i>circMAN2A1</i> | miR-1244              | 1 |
| <i>circMAN2A1</i> | miR-1248              | 3 |
| <i>circMAN2A1</i> | miR-1255b-2-3p        | 2 |
| <i>circMAN2A1</i> | miR-1260a/1260b       | 1 |
| <i>circMAN2A1</i> | miR-1264              | 2 |
| <i>circMAN2A1</i> | miR-1277-5p           | 1 |
| <i>circMAN2A1</i> | miR-185-3p            | 2 |
| <i>circMAN2A1</i> | miR-188-3p            | 1 |
| <i>circMAN2A1</i> | miR-208-5p            | 2 |
| <i>circMAN2A1</i> | miR-30-3p             | 4 |
| <i>circMAN2A1</i> | miR-302c-5p           | 1 |
| <i>circMAN2A1</i> | miR-3117-3p           | 1 |
| <i>circMAN2A1</i> | miR-3120-3p           | 1 |
| <i>circMAN2A1</i> | miR-3156-3p           | 1 |
| <i>circMAN2A1</i> | miR-3182              | 3 |
| <i>circMAN2A1</i> | miR-3184-3p           | 2 |
| <i>circMAN2A1</i> | miR-324-5p            | 2 |
| <i>circMAN2A1</i> | miR-3605-3p           | 1 |
| <i>circMAN2A1</i> | miR-3655              | 3 |
| <i>circMAN2A1</i> | miR-369-3p            | 1 |
| <i>circMAN2A1</i> | miR-374-5p            | 2 |
| <i>circMAN2A1</i> | miR-431-5p            | 2 |
| <i>circMAN2A1</i> | miR-4310/7157-5p      | 2 |
| <i>circMAN2A1</i> | miR-4330              | 2 |
| <i>circMAN2A1</i> | miR-4477a             | 2 |
| <i>circMAN2A1</i> | miR-4509              | 2 |
| <i>circMAN2A1</i> | miR-4659a-3p/4659b-3p | 2 |
| <i>circMAN2A1</i> | miR-4714-3p           | 1 |
| <i>circMAN2A1</i> | miR-4716-5p           | 2 |
| <i>circMAN2A1</i> | miR-4733-5p           | 5 |
| <i>circMAN2A1</i> | miR-4744              | 2 |
| <i>circMAN2A1</i> | miR-4762-3p           | 3 |
| <i>circMAN2A1</i> | miR-4778-3p           | 6 |
| <i>circMAN2A1</i> | miR-4799-5p           | 2 |

|                   |                                                                    |   |
|-------------------|--------------------------------------------------------------------|---|
| <i>circMAN2A1</i> | miR-488-3p                                                         | 2 |
| <i>circMAN2A1</i> | miR-490-3p                                                         | 2 |
| <i>circMAN2A1</i> | miR-510-3p                                                         | 3 |
| <i>circMAN2A1</i> | miR-548ai/548ag/548ba/570-5p                                       | 3 |
| <i>circMAN2A1</i> | miR-548av-5p/548k/8054                                             | 1 |
| <i>circMAN2A1</i> | miR-548ay-5p/548au-5p/548as-5p/548ar-5p/548aq-5p/548ap-5p/548am-5p | 1 |
| <i>circMAN2A1</i> | miR-548c-3p                                                        | 3 |
| <i>circMAN2A1</i> | miR-548l                                                           | 1 |
| <i>circMAN2A1</i> | miR-548m                                                           | 1 |
| <i>circMAN2A1</i> | miR-552-5p                                                         | 2 |
| <i>circMAN2A1</i> | miR-5585-3p                                                        | 1 |
| <i>circMAN2A1</i> | miR-562                                                            | 1 |
| <i>circMAN2A1</i> | miR-5681a                                                          | 1 |
| <i>circMAN2A1</i> | miR-5692a                                                          | 3 |
| <i>circMAN2A1</i> | miR-5692bc                                                         | 1 |
| <i>circMAN2A1</i> | miR-616-3p                                                         | 1 |
| <i>circMAN2A1</i> | miR-619-3p                                                         | 1 |
| <i>circMAN2A1</i> | miR-649                                                            | 2 |
| <i>circMAN2A1</i> | miR-6502-3p                                                        | 3 |
| <i>circMAN2A1</i> | miR-6507-3p                                                        | 3 |
| <i>circMAN2A1</i> | miR-651-5p                                                         | 2 |
| <i>circMAN2A1</i> | miR-670-3p                                                         | 2 |
| <i>circMAN2A1</i> | miR-6730-5p                                                        | 1 |
| <i>circMAN2A1</i> | miR-6740-3p                                                        | 2 |
| <i>circMAN2A1</i> | miR-6742-3p                                                        | 1 |
| <i>circMAN2A1</i> | miR-676-5p                                                         | 2 |
| <i>circMAN2A1</i> | miR-6818-3p                                                        | 5 |
| <i>circMAN2A1</i> | miR-6852-5p                                                        | 1 |
| <i>circMAN2A1</i> | miR-6868-3p                                                        | 5 |
| <i>circMAN2A1</i> | miR-6875-3p                                                        | 2 |
| <i>circMAN2A1</i> | miR-7153-3p                                                        | 3 |
| <i>circMAN2A1</i> | miR-7161-3p                                                        | 2 |
| <i>circMAN2A1</i> | miR-7851-3p                                                        | 1 |
| <i>circMAN2A1</i> | miR-939-3p                                                         | 1 |
| <i>circMAN2A1</i> | miR-100-3p                                                         | 1 |
| <i>circMAN2A1</i> | miR-124-3p.1                                                       | 1 |
| <i>circMAN2A1</i> | miR-124-3p.2/506-3p                                                | 2 |
| <i>circMAN2A1</i> | miR-1250-3p                                                        | 1 |

|                   |                       |   |
|-------------------|-----------------------|---|
| <i>circMAN2A1</i> | miR-1273d             | 1 |
| <i>circMAN2A1</i> | miR-1273g-3p          | 1 |
| <i>circMAN2A1</i> | miR-1295b-5p/1912     | 2 |
| <i>circMAN2A1</i> | miR-1305              | 2 |
| <i>circMAN2A1</i> | miR-1306-5p           | 1 |
| <i>circMAN2A1</i> | miR-1468-3p           | 1 |
| <i>circMAN2A1</i> | miR-205-3p            | 2 |
| <i>circMAN2A1</i> | miR-205-5p            | 3 |
| <i>circMAN2A1</i> | miR-215-3p            | 2 |
| <i>circMAN2A1</i> | miR-219b-5p           | 2 |
| <i>circMAN2A1</i> | miR-299-3p            | 3 |
| <i>circMAN2A1</i> | miR-3130-5p/4482-5p   | 2 |
| <i>circMAN2A1</i> | miR-3180-5p           | 2 |
| <i>circMAN2A1</i> | miR-3198/4309         | 1 |
| <i>circMAN2A1</i> | miR-32-3p             | 1 |
| <i>circMAN2A1</i> | miR-320e              | 2 |
| <i>circMAN2A1</i> | miR-345-5p            | 2 |
| <i>circMAN2A1</i> | miR-3622a-3p/3622b-3p | 1 |
| <i>circMAN2A1</i> | miR-3714              | 1 |
| <i>circMAN2A1</i> | miR-3910              | 1 |
| <i>circMAN2A1</i> | miR-4252              | 2 |
| <i>circMAN2A1</i> | miR-4269/6715b-5p     | 1 |
| <i>circMAN2A1</i> | miR-4275              | 3 |
| <i>circMAN2A1</i> | miR-4421/5699-3p      | 1 |
| <i>circMAN2A1</i> | miR-4470              | 1 |
| <i>circMAN2A1</i> | miR-4477b             | 1 |
| <i>circMAN2A1</i> | miR-4482-3p           | 1 |
| <i>circMAN2A1</i> | miR-4491/4657         | 3 |
| <i>circMAN2A1</i> | miR-4502              | 1 |
| <i>circMAN2A1</i> | miR-4514/4692         | 1 |
| <i>circMAN2A1</i> | miR-4691-3p           | 2 |
| <i>circMAN2A1</i> | miR-4698              | 3 |
| <i>circMAN2A1</i> | miR-4703-3p           | 1 |
| <i>circMAN2A1</i> | miR-4742-5p           | 1 |
| <i>circMAN2A1</i> | miR-4750-3p           | 1 |
| <i>circMAN2A1</i> | miR-4752              | 1 |
| <i>circMAN2A1</i> | miR-4795-3p           | 2 |
| <i>circMAN2A1</i> | miR-498               | 2 |

|                   |                                      |   |
|-------------------|--------------------------------------|---|
| <i>circMAN2A1</i> | miR-513b-5p                          | 1 |
| <i>circMAN2A1</i> | miR-548aj-5p/548f-5p/548g-5p/548x-5p | 1 |
| <i>circMAN2A1</i> | miR-5579-3p                          | 1 |
| <i>circMAN2A1</i> | miR-582-3p                           | 2 |
| <i>circMAN2A1</i> | miR-6512-5p                          | 2 |
| <i>circMAN2A1</i> | miR-656-3p                           | 1 |
| <i>circMAN2A1</i> | miR-6720-5p                          | 3 |
| <i>circMAN2A1</i> | miR-6748-3p                          | 1 |
| <i>circMAN2A1</i> | miR-676-3p                           | 2 |
| <i>circMAN2A1</i> | miR-6765-3p                          | 1 |
| <i>circMAN2A1</i> | miR-6773-3p                          | 2 |
| <i>circMAN2A1</i> | miR-6833-5p                          | 1 |
| <i>circMAN2A1</i> | miR-6834-3p                          | 1 |
| <i>circMAN2A1</i> | miR-6849-3p                          | 3 |
| <i>circMAN2A1</i> | miR-7159-3p                          | 1 |
| <i>circMAN2A1</i> | miR-7847-3p                          | 2 |
| <i>circMAN2A1</i> | miR-7849-3p                          | 1 |
| <i>circMAN2A1</i> | miR-8063                             | 3 |
| <i>circMAN2A1</i> | miR-8066                             | 2 |
| <i>circMAN2A1</i> | miR-101-3p.1                         | 1 |
| <i>circMAN2A1</i> | miR-103-3p/107                       | 1 |
| <i>circMAN2A1</i> | miR-103a-2-5p                        | 1 |
| <i>circMAN2A1</i> | miR-103b                             | 1 |
| <i>circMAN2A1</i> | miR-106b-3p                          | 1 |
| <i>circMAN2A1</i> | miR-1178-5p                          | 1 |
| <i>circMAN2A1</i> | miR-1182                             | 1 |
| <i>circMAN2A1</i> | miR-1233-3p                          | 1 |
| <i>circMAN2A1</i> | miR-1238-5p/4758-5p                  | 1 |
| <i>circMAN2A1</i> | miR-124-5p                           | 1 |
| <i>circMAN2A1</i> | miR-1245a/8079                       | 1 |
| <i>circMAN2A1</i> | miR-1247-3p                          | 2 |
| <i>circMAN2A1</i> | miR-1252-3p                          | 1 |
| <i>circMAN2A1</i> | miR-1261                             | 2 |
| <i>circMAN2A1</i> | miR-1263                             | 2 |
| <i>circMAN2A1</i> | miR-1265                             | 1 |
| <i>circMAN2A1</i> | miR-1266-5p/4518                     | 1 |
| <i>circMAN2A1</i> | miR-1269                             | 1 |
| <i>circMAN2A1</i> | miR-1272                             | 2 |

|                   |                                      |   |
|-------------------|--------------------------------------|---|
| <i>circMAN2A1</i> | miR-1273h-3p                         | 1 |
| <i>circMAN2A1</i> | miR-1275/4665-5p                     | 1 |
| <i>circMAN2A1</i> | miR-1279                             | 2 |
| <i>circMAN2A1</i> | miR-128-3p                           | 1 |
| <i>circMAN2A1</i> | miR-1282                             | 1 |
| <i>circMAN2A1</i> | miR-1288-3p                          | 1 |
| <i>circMAN2A1</i> | miR-1288-5p                          | 2 |
| <i>circMAN2A1</i> | miR-129-3p                           | 3 |
| <i>circMAN2A1</i> | miR-129-5p                           | 2 |
| <i>circMAN2A1</i> | miR-1291/6775-3p                     | 1 |
| <i>circMAN2A1</i> | miR-1292-5p                          | 2 |
| <i>circMAN2A1</i> | miR-130-3p/301-3p/454-3p             | 1 |
| <i>circMAN2A1</i> | miR-132-3p/212-3p                    | 1 |
| <i>circMAN2A1</i> | miR-1322                             | 2 |
| <i>circMAN2A1</i> | miR-1323                             | 1 |
| <i>circMAN2A1</i> | miR-142-5p                           | 1 |
| <i>circMAN2A1</i> | miR-144-3p                           | 1 |
| <i>circMAN2A1</i> | miR-145-3p                           | 2 |
| <i>circMAN2A1</i> | miR-145-5p                           | 2 |
| <i>circMAN2A1</i> | miR-146-5p                           | 2 |
| <i>circMAN2A1</i> | miR-146a-3p                          | 2 |
| <i>circMAN2A1</i> | miR-146b-3p                          | 1 |
| <i>circMAN2A1</i> | miR-148-3p/152-3p                    | 2 |
| <i>circMAN2A1</i> | miR-148a-5p                          | 1 |
| <i>circMAN2A1</i> | miR-149-5p                           | 1 |
| <i>circMAN2A1</i> | miR-15-5p/16-5p/195-5p/424-5p/497-5p | 1 |
| <i>circMAN2A1</i> | miR-150-3p                           | 2 |
| <i>circMAN2A1</i> | miR-153-3p                           | 1 |
| <i>circMAN2A1</i> | miR-1537-5p                          | 2 |
| <i>circMAN2A1</i> | miR-17-5p/20-5p/93-5p/106-5p/519-3p  | 2 |
| <i>circMAN2A1</i> | miR-181c-3p                          | 1 |
| <i>circMAN2A1</i> | miR-185-5p                           | 1 |
| <i>circMAN2A1</i> | miR-19-3p                            | 1 |
| <i>circMAN2A1</i> | miR-1910-5p                          | 2 |
| <i>circMAN2A1</i> | miR-1914-5p                          | 1 |
| <i>circMAN2A1</i> | miR-1915-3p/6764-5p                  | 1 |
| <i>circMAN2A1</i> | miR-193-3p                           | 1 |
| <i>circMAN2A1</i> | miR-193a-5p                          | 1 |

|                   |                     |   |
|-------------------|---------------------|---|
| <i>circMAN2A1</i> | miR-198             | 2 |
| <i>circMAN2A1</i> | miR-199-3p          | 1 |
| <i>circMAN2A1</i> | miR-200ab-5p        | 2 |
| <i>circMAN2A1</i> | miR-203a-3p.1       | 1 |
| <i>circMAN2A1</i> | miR-20a-3p          | 1 |
| <i>circMAN2A1</i> | miR-20b-3p          | 1 |
| <i>circMAN2A1</i> | miR-2114-5p         | 2 |
| <i>circMAN2A1</i> | miR-214-3p/3619-5p  | 1 |
| <i>circMAN2A1</i> | miR-216a-5p         | 2 |
| <i>circMAN2A1</i> | miR-216b-3p         | 1 |
| <i>circMAN2A1</i> | miR-216b-5p         | 2 |
| <i>circMAN2A1</i> | miR-217             | 1 |
| <i>circMAN2A1</i> | miR-22-3p           | 1 |
| <i>circMAN2A1</i> | miR-223-3p          | 1 |
| <i>circMAN2A1</i> | miR-223-5p          | 3 |
| <i>circMAN2A1</i> | miR-2355-3p         | 1 |
| <i>circMAN2A1</i> | miR-2355-5p         | 1 |
| <i>circMAN2A1</i> | miR-2392            | 1 |
| <i>circMAN2A1</i> | miR-2467-3p         | 2 |
| <i>circMAN2A1</i> | miR-2681-3p         | 2 |
| <i>circMAN2A1</i> | miR-27-3p           | 1 |
| <i>circMAN2A1</i> | miR-27b-5p          | 1 |
| <i>circMAN2A1</i> | miR-299-5p          | 1 |
| <i>circMAN2A1</i> | miR-29a-5p          | 1 |
| <i>circMAN2A1</i> | miR-29c-5p          | 1 |
| <i>circMAN2A1</i> | miR-301a-5p/301b-5p | 2 |
| <i>circMAN2A1</i> | miR-302a-5p         | 3 |
| <i>circMAN2A1</i> | miR-302b-5p/302d-5p | 1 |
| <i>circMAN2A1</i> | miR-3074-5p         | 2 |
| <i>circMAN2A1</i> | miR-3120-5p         | 1 |
| <i>circMAN2A1</i> | miR-3121-3p         | 3 |
| <i>circMAN2A1</i> | miR-3123            | 3 |
| <i>circMAN2A1</i> | miR-3127-5p         | 1 |
| <i>circMAN2A1</i> | miR-3128            | 1 |
| <i>circMAN2A1</i> | miR-3137            | 1 |
| <i>circMAN2A1</i> | miR-3141            | 2 |
| <i>circMAN2A1</i> | miR-3144-5p         | 1 |
| <i>circMAN2A1</i> | miR-3149            | 1 |

|                   |                           |   |
|-------------------|---------------------------|---|
| <i>circMAN2A1</i> | miR-3151-3p               | 1 |
| <i>circMAN2A1</i> | miR-3154                  | 1 |
| <i>circMAN2A1</i> | miR-3157-5p               | 1 |
| <i>circMAN2A1</i> | miR-3161                  | 2 |
| <i>circMAN2A1</i> | miR-3163                  | 1 |
| <i>circMAN2A1</i> | miR-3171                  | 2 |
| <i>circMAN2A1</i> | miR-3173-5p               | 1 |
| <i>circMAN2A1</i> | miR-3177-3p               | 1 |
| <i>circMAN2A1</i> | miR-3185                  | 1 |
| <i>circMAN2A1</i> | miR-3191-3p               | 1 |
| <i>circMAN2A1</i> | miR-3191-5p               | 2 |
| <i>circMAN2A1</i> | miR-3192-3p               | 1 |
| <i>circMAN2A1</i> | miR-3199/8052             | 1 |
| <i>circMAN2A1</i> | miR-320                   | 2 |
| <i>circMAN2A1</i> | miR-3202                  | 1 |
| <i>circMAN2A1</i> | miR-325                   | 1 |
| <i>circMAN2A1</i> | miR-326                   | 1 |
| <i>circMAN2A1</i> | miR-328-3p                | 1 |
| <i>circMAN2A1</i> | miR-328-5p/6885-5p        | 1 |
| <i>circMAN2A1</i> | miR-329-5p                | 1 |
| <i>circMAN2A1</i> | miR-337-3p                | 1 |
| <i>circMAN2A1</i> | miR-33a-3p                | 1 |
| <i>circMAN2A1</i> | miR-33b-3p/515-3p/519e-3p | 1 |
| <i>circMAN2A1</i> | miR-3607-5p               | 3 |
| <i>circMAN2A1</i> | miR-361-5p                | 1 |
| <i>circMAN2A1</i> | miR-3613-3p               | 4 |
| <i>circMAN2A1</i> | miR-3614-3p               | 1 |
| <i>circMAN2A1</i> | miR-3646                  | 1 |
| <i>circMAN2A1</i> | miR-3651                  | 2 |
| <i>circMAN2A1</i> | miR-3653-3p               | 2 |
| <i>circMAN2A1</i> | miR-3659                  | 1 |
| <i>circMAN2A1</i> | miR-365a-5p/365b-5p       | 1 |
| <i>circMAN2A1</i> | miR-3664-3p               | 1 |
| <i>circMAN2A1</i> | miR-3678-3p               | 1 |
| <i>circMAN2A1</i> | miR-3680-3p               | 2 |
| <i>circMAN2A1</i> | miR-3681-5p               | 1 |
| <i>circMAN2A1</i> | miR-3687/4442             | 1 |
| <i>circMAN2A1</i> | miR-3688-5p               | 2 |



|                   |                                   |   |
|-------------------|-----------------------------------|---|
| <i>circMAN2A1</i> | miR-3689a-5p/3689b-5p/3689e/3689f | 1 |
| <i>circMAN2A1</i> | miR-3692-5p                       | 1 |
| <i>circMAN2A1</i> | miR-370-3p                        | 1 |
| <i>circMAN2A1</i> | miR-371a-3p                       | 1 |
| <i>circMAN2A1</i> | miR-371b-3p                       | 1 |
| <i>circMAN2A1</i> | miR-375                           | 1 |
| <i>circMAN2A1</i> | miR-376-3p                        | 2 |
| <i>circMAN2A1</i> | miR-376b-5p/376c-5p               | 2 |
| <i>circMAN2A1</i> | miR-377-5p/6086                   | 1 |
| <i>circMAN2A1</i> | miR-383-5p.1                      | 2 |
| <i>circMAN2A1</i> | miR-3912-5p                       | 2 |
| <i>circMAN2A1</i> | miR-3918                          | 1 |
| <i>circMAN2A1</i> | miR-3919                          | 2 |
| <i>circMAN2A1</i> | miR-3921/4653-5p                  | 2 |
| <i>circMAN2A1</i> | miR-3925-3p                       | 3 |
| <i>circMAN2A1</i> | miR-3925-5p                       | 3 |
| <i>circMAN2A1</i> | miR-3945                          | 1 |
| <i>circMAN2A1</i> | miR-3973                          | 2 |
| <i>circMAN2A1</i> | miR-409-3p                        | 1 |
| <i>circMAN2A1</i> | miR-410-3p                        | 1 |
| <i>circMAN2A1</i> | miR-411-3p                        | 2 |
| <i>circMAN2A1</i> | miR-411-5p.2                      | 1 |
| <i>circMAN2A1</i> | miR-4253/6862-5p                  | 1 |
| <i>circMAN2A1</i> | miR-4255                          | 2 |
| <i>circMAN2A1</i> | miR-4270/4441/6754-5p             | 2 |
| <i>circMAN2A1</i> | miR-4277                          | 1 |
| <i>circMAN2A1</i> | miR-4279                          | 1 |
| <i>circMAN2A1</i> | miR-4289                          | 1 |
| <i>circMAN2A1</i> | miR-4291                          | 1 |
| <i>circMAN2A1</i> | miR-4303                          | 1 |
| <i>circMAN2A1</i> | miR-4304                          | 1 |
| <i>circMAN2A1</i> | miR-4307                          | 1 |
| <i>circMAN2A1</i> | miR-4314                          | 1 |
| <i>circMAN2A1</i> | miR-432-3p                        | 1 |
| <i>circMAN2A1</i> | miR-432-5p                        | 1 |
| <i>circMAN2A1</i> | miR-4321                          | 1 |
| <i>circMAN2A1</i> | miR-4326                          | 2 |
| <i>circMAN2A1</i> | miR-433-3p                        | 1 |

|                   |                          |   |
|-------------------|--------------------------|---|
| <i>circMAN2A1</i> | miR-4433a-3p             | 2 |
| <i>circMAN2A1</i> | miR-4434/4516/5703       | 1 |
| <i>circMAN2A1</i> | miR-4453/4538            | 1 |
| <i>circMAN2A1</i> | miR-4457                 | 2 |
| <i>circMAN2A1</i> | miR-4459                 | 2 |
| <i>circMAN2A1</i> | miR-4460                 | 1 |
| <i>circMAN2A1</i> | miR-4464/4748            | 2 |
| <i>circMAN2A1</i> | miR-4471/8059            | 2 |
| <i>circMAN2A1</i> | miR-4474-3p              | 2 |
| <i>circMAN2A1</i> | miR-4475                 | 1 |
| <i>circMAN2A1</i> | miR-4476/6876-5p         | 2 |
| <i>circMAN2A1</i> | miR-448                  | 1 |
| <i>circMAN2A1</i> | miR-4490                 | 1 |
| <i>circMAN2A1</i> | miR-4495                 | 1 |
| <i>circMAN2A1</i> | miR-4504                 | 1 |
| <i>circMAN2A1</i> | miR-450b-5p              | 2 |
| <i>circMAN2A1</i> | miR-4515                 | 1 |
| <i>circMAN2A1</i> | miR-452-3p               | 3 |
| <i>circMAN2A1</i> | miR-4520-2-3p            | 2 |
| <i>circMAN2A1</i> | miR-4520-3p              | 1 |
| <i>circMAN2A1</i> | miR-4523                 | 1 |
| <i>circMAN2A1</i> | miR-4527/6503-5p         | 1 |
| <i>circMAN2A1</i> | miR-4529-3p              | 2 |
| <i>circMAN2A1</i> | miR-4533                 | 1 |
| <i>circMAN2A1</i> | miR-455-3p.1             | 2 |
| <i>circMAN2A1</i> | miR-4642                 | 2 |
| <i>circMAN2A1</i> | miR-4646-3p              | 1 |
| <i>circMAN2A1</i> | miR-4649-5p/6729-5p      | 1 |
| <i>circMAN2A1</i> | miR-4652-3p              | 3 |
| <i>circMAN2A1</i> | miR-4652-5p              | 1 |
| <i>circMAN2A1</i> | miR-4658/6790-5p         | 1 |
| <i>circMAN2A1</i> | miR-4661-3p              | 2 |
| <i>circMAN2A1</i> | miR-4662-5p              | 1 |
| <i>circMAN2A1</i> | miR-4662a-3p             | 1 |
| <i>circMAN2A1</i> | miR-4667-5p/4700-5p/8089 | 1 |
| <i>circMAN2A1</i> | miR-4668-3p              | 5 |
| <i>circMAN2A1</i> | miR-4677-3p              | 2 |
| <i>circMAN2A1</i> | miR-4678                 | 1 |

|                   |                                  |   |
|-------------------|----------------------------------|---|
| <i>circMAN2A1</i> | miR-4679                         | 2 |
| <i>circMAN2A1</i> | miR-4680-5p                      | 2 |
| <i>circMAN2A1</i> | miR-4685-5p/6837-5p              | 1 |
| <i>circMAN2A1</i> | miR-4687-5p                      | 3 |
| <i>circMAN2A1</i> | miR-4690-3p/5685                 | 1 |
| <i>circMAN2A1</i> | miR-4693-3p                      | 1 |
| <i>circMAN2A1</i> | miR-4697-3p                      | 1 |
| <i>circMAN2A1</i> | miR-4710                         | 1 |
| <i>circMAN2A1</i> | miR-4711-5p                      | 3 |
| <i>circMAN2A1</i> | miR-4712-3p                      | 2 |
| <i>circMAN2A1</i> | miR-4713-3p                      | 1 |
| <i>circMAN2A1</i> | miR-4718                         | 2 |
| <i>circMAN2A1</i> | miR-4720-5p/4799-3p/5588-5p      | 1 |
| <i>circMAN2A1</i> | miR-4723-5p/5698/6870-5p/7111-5p | 1 |
| <i>circMAN2A1</i> | miR-4726-3p                      | 1 |
| <i>circMAN2A1</i> | miR-4727-3p                      | 1 |
| <i>circMAN2A1</i> | miR-4727-5p                      | 1 |
| <i>circMAN2A1</i> | miR-4738-5p                      | 1 |
| <i>circMAN2A1</i> | miR-4740-5p                      | 1 |
| <i>circMAN2A1</i> | miR-4742-3p                      | 3 |
| <i>circMAN2A1</i> | miR-4743-3p                      | 3 |
| <i>circMAN2A1</i> | miR-4755-3p                      | 1 |
| <i>circMAN2A1</i> | miR-4756-3p                      | 2 |
| <i>circMAN2A1</i> | miR-4760-3p                      | 1 |
| <i>circMAN2A1</i> | miR-4764-5p                      | 3 |
| <i>circMAN2A1</i> | miR-4768-3p                      | 2 |
| <i>circMAN2A1</i> | miR-4772-5p                      | 2 |
| <i>circMAN2A1</i> | miR-4774-5p                      | 1 |
| <i>circMAN2A1</i> | miR-4778-5p                      | 2 |
| <i>circMAN2A1</i> | miR-4780                         | 1 |
| <i>circMAN2A1</i> | miR-4781-3p                      | 1 |
| <i>circMAN2A1</i> | miR-4785                         | 1 |
| <i>circMAN2A1</i> | miR-4792                         | 1 |
| <i>circMAN2A1</i> | miR-4798-5p                      | 1 |
| <i>circMAN2A1</i> | miR-483-3p.1                     | 1 |
| <i>circMAN2A1</i> | miR-483-3p.2                     | 2 |
| <i>circMAN2A1</i> | miR-488-5p                       | 1 |
| <i>circMAN2A1</i> | miR-489-5p                       | 1 |

|                   |                                                                  |   |
|-------------------|------------------------------------------------------------------|---|
| <i>circMAN2A1</i> | miR-491-3p                                                       | 1 |
| <i>circMAN2A1</i> | miR-493-3p                                                       | 1 |
| <i>circMAN2A1</i> | miR-494-3p                                                       | 1 |
| <i>circMAN2A1</i> | miR-4999-5p                                                      | 2 |
| <i>circMAN2A1</i> | miR-5001-3p                                                      | 1 |
| <i>circMAN2A1</i> | miR-5003-5p                                                      | 1 |
| <i>circMAN2A1</i> | miR-5007-3p                                                      | 2 |
| <i>circMAN2A1</i> | miR-5007-5p                                                      | 1 |
| <i>circMAN2A1</i> | miR-5009-5p/8058                                                 | 1 |
| <i>circMAN2A1</i> | miR-500b-3p                                                      | 1 |
| <i>circMAN2A1</i> | miR-5010-5p                                                      | 1 |
| <i>circMAN2A1</i> | miR-503-5p                                                       | 1 |
| <i>circMAN2A1</i> | miR-507/557                                                      | 2 |
| <i>circMAN2A1</i> | miR-509-3-5p/509-5p/4418                                         | 1 |
| <i>circMAN2A1</i> | miR-509-3p                                                       | 1 |
| <i>circMAN2A1</i> | miR-5092                                                         | 1 |
| <i>circMAN2A1</i> | miR-5093                                                         | 1 |
| <i>circMAN2A1</i> | miR-5096                                                         | 1 |
| <i>circMAN2A1</i> | miR-512-5p                                                       | 1 |
| <i>circMAN2A1</i> | miR-513a-3p/513c-3p/3606-3p                                      | 1 |
| <i>circMAN2A1</i> | miR-513a-5p                                                      | 1 |
| <i>circMAN2A1</i> | miR-515-5p/519e-5p                                               | 4 |
| <i>circMAN2A1</i> | miR-516a-5p                                                      | 1 |
| <i>circMAN2A1</i> | miR-5186                                                         | 2 |
| <i>circMAN2A1</i> | miR-5187-5p                                                      | 1 |
| <i>circMAN2A1</i> | miR-518a-5p/527                                                  | 1 |
| <i>circMAN2A1</i> | miR-518c-5p                                                      | 1 |
| <i>circMAN2A1</i> | miR-5192                                                         | 1 |
| <i>circMAN2A1</i> | miR-520g-3p                                                      | 2 |
| <i>circMAN2A1</i> | miR-539-5p                                                       | 2 |
| <i>circMAN2A1</i> | miR-542-3p                                                       | 1 |
| <i>circMAN2A1</i> | miR-545-5p                                                       | 1 |
| <i>circMAN2A1</i> | miR-548ac/548bb-3p/548d-3p/548h-3p/548z                          |   |
| <i>circMAN2A1</i> | miR-548ah-5p/3609                                                | 2 |
| <i>circMAN2A1</i> | miR-548ap-3p/548aa/548t-3p                                       | 1 |
| <i>circMAN2A1</i> | miR-548aq-3p/548am-3p/548aj-3p/548ah13p/548ae-3p/548j-3p/548x-3p |   |
| <i>circMAN2A1</i> | miR-548as-3p                                                     | 1 |
| <i>circMAN2A1</i> | miR-548at-5p                                                     | 2 |

|                   |                                               |   |
|-------------------|-----------------------------------------------|---|
| <i>circMAN2A1</i> | miR-548av-3p                                  | 4 |
| <i>circMAN2A1</i> | miR-548aw                                     | 1 |
| <i>circMAN2A1</i> | miR-548ay-3p/548at-3p                         | 1 |
| <i>circMAN2A1</i> | miR-548az-3p/548ar-3p/548a-3p/548e-3p/548f-3p | 1 |
| <i>circMAN2A1</i> | miR-548az-5p/548t-5p                          | 1 |
| <i>circMAN2A1</i> | miR-548e-5p                                   | 3 |
| <i>circMAN2A1</i> | miR-548g-3p                                   | 4 |
| <i>circMAN2A1</i> | miR-548n                                      | 1 |
| <i>circMAN2A1</i> | miR-549a                                      | 1 |
| <i>circMAN2A1</i> | miR-551b-5p                                   | 2 |
| <i>circMAN2A1</i> | miR-5571-3p                                   | 1 |
| <i>circMAN2A1</i> | miR-5571-5p                                   | 2 |
| <i>circMAN2A1</i> | miR-5581-3p                                   | 2 |
| <i>circMAN2A1</i> | miR-5582-3p                                   | 1 |
| <i>circMAN2A1</i> | miR-5584-5p                                   | 1 |
| <i>circMAN2A1</i> | miR-5586-5p                                   | 1 |
| <i>circMAN2A1</i> | miR-5588-3p                                   | 2 |
| <i>circMAN2A1</i> | miR-561-3p                                    | 2 |
| <i>circMAN2A1</i> | miR-567                                       | 2 |
| <i>circMAN2A1</i> | miR-5683                                      | 1 |
| <i>circMAN2A1</i> | miR-5700                                      | 1 |
| <i>circMAN2A1</i> | miR-5701                                      | 1 |
| <i>circMAN2A1</i> | miR-5707                                      | 1 |
| <i>circMAN2A1</i> | miR-574-5p                                    | 1 |
| <i>circMAN2A1</i> | miR-577                                       | 1 |
| <i>circMAN2A1</i> | miR-580-3p                                    | 2 |
| <i>circMAN2A1</i> | miR-580-5p                                    | 1 |
| <i>circMAN2A1</i> | miR-581                                       | 1 |
| <i>circMAN2A1</i> | miR-584-3p                                    | 2 |
| <i>circMAN2A1</i> | miR-587                                       | 3 |
| <i>circMAN2A1</i> | miR-589-5p                                    | 2 |
| <i>circMAN2A1</i> | miR-595                                       | 2 |
| <i>circMAN2A1</i> | miR-607                                       | 2 |
| <i>circMAN2A1</i> | miR-6071                                      | 1 |
| <i>circMAN2A1</i> | miR-6077                                      | 1 |
| <i>circMAN2A1</i> | miR-6080                                      | 2 |
| <i>circMAN2A1</i> | miR-6083                                      | 2 |
| <i>circMAN2A1</i> | miR-615-3p                                    | 1 |

|                   |                     |   |
|-------------------|---------------------|---|
| <i>circMAN2A1</i> | miR-618             | 1 |
| <i>circMAN2A1</i> | miR-625-5p          | 1 |
| <i>circMAN2A1</i> | miR-628-3p          | 1 |
| <i>circMAN2A1</i> | miR-628-5p          | 2 |
| <i>circMAN2A1</i> | miR-629-3p          | 1 |
| <i>circMAN2A1</i> | miR-630             | 1 |
| <i>circMAN2A1</i> | miR-637             | 1 |
| <i>circMAN2A1</i> | miR-638             | 1 |
| <i>circMAN2A1</i> | miR-643             | 1 |
| <i>circMAN2A1</i> | miR-646             | 1 |
| <i>circMAN2A1</i> | miR-648             | 1 |
| <i>circMAN2A1</i> | miR-6507-5p         | 1 |
| <i>circMAN2A1</i> | miR-6513-3p         | 1 |
| <i>circMAN2A1</i> | miR-6516-3p         | 1 |
| <i>circMAN2A1</i> | miR-6516-5p         | 1 |
| <i>circMAN2A1</i> | miR-653-5p          | 1 |
| <i>circMAN2A1</i> | miR-655-5p          | 1 |
| <i>circMAN2A1</i> | miR-664a-5p/4794    | 1 |
| <i>circMAN2A1</i> | miR-665             | 1 |
| <i>circMAN2A1</i> | miR-6715b-3p        | 2 |
| <i>circMAN2A1</i> | miR-6750-5p/6822-5p | 1 |
| <i>circMAN2A1</i> | miR-6751-5p/6803-5p | 1 |
| <i>circMAN2A1</i> | miR-6752-3p         | 1 |
| <i>circMAN2A1</i> | miR-6753-3p/7107-3p | 1 |
| <i>circMAN2A1</i> | miR-6764-3p/6824-3p | 1 |
| <i>circMAN2A1</i> | miR-6776-3p         | 1 |
| <i>circMAN2A1</i> | miR-6777-3p         | 1 |
| <i>circMAN2A1</i> | miR-6778-3p         | 1 |
| <i>circMAN2A1</i> | miR-6779-3p         | 3 |
| <i>circMAN2A1</i> | miR-6780b-3p        | 1 |
| <i>circMAN2A1</i> | miR-6791-3p/6829-3p | 1 |
| <i>circMAN2A1</i> | miR-6792-5p         | 1 |
| <i>circMAN2A1</i> | miR-6795-5p/6887-5p | 1 |
| <i>circMAN2A1</i> | miR-6815-3p         | 1 |
| <i>circMAN2A1</i> | miR-6817-3p         | 2 |
| <i>circMAN2A1</i> | miR-6826-5p         | 1 |
| <i>circMAN2A1</i> | miR-6828-3p         | 1 |
| <i>circMAN2A1</i> | miR-6830-3p         | 1 |

|                   |              |   |
|-------------------|--------------|---|
| <i>circMAN2A1</i> | miR-6836-3p  | 1 |
| <i>circMAN2A1</i> | miR-6840-3p  | 1 |
| <i>circMAN2A1</i> | miR-6851-3p  | 1 |
| <i>circMAN2A1</i> | miR-6863     | 1 |
| <i>circMAN2A1</i> | miR-6868-5p  | 1 |
| <i>circMAN2A1</i> | miR-6873-3p  | 1 |
| <i>circMAN2A1</i> | miR-6874-5p  | 1 |
| <i>circMAN2A1</i> | miR-6882-5p  | 1 |
| <i>circMAN2A1</i> | miR-6886-3p  | 2 |
| <i>circMAN2A1</i> | miR-6888-3p  | 3 |
| <i>circMAN2A1</i> | miR-6888-5p  | 2 |
| <i>circMAN2A1</i> | miR-7-5p     | 1 |
| <i>circMAN2A1</i> | miR-7108-5p  | 2 |
| <i>circMAN2A1</i> | miR-7109-5p  | 1 |
| <i>circMAN2A1</i> | miR-7110-3p  | 2 |
| <i>circMAN2A1</i> | miR-7112-3p  | 3 |
| <i>circMAN2A1</i> | miR-7113-5p  | 1 |
| <i>circMAN2A1</i> | miR-7150     | 2 |
| <i>circMAN2A1</i> | miR-7151-5p  | 1 |
| <i>circMAN2A1</i> | miR-7152-5p  | 2 |
| <i>circMAN2A1</i> | miR-7154-5p  | 1 |
| <i>circMAN2A1</i> | miR-7155-5p  | 1 |
| <i>circMAN2A1</i> | miR-766-3p   | 3 |
| <i>circMAN2A1</i> | miR-7705     | 1 |
| <i>circMAN2A1</i> | miR-7845-5p  | 1 |
| <i>circMAN2A1</i> | miR-7846-3p  | 1 |
| <i>circMAN2A1</i> | miR-7850-5p  | 1 |
| <i>circMAN2A1</i> | miR-7855-5p  | 2 |
| <i>circMAN2A1</i> | miR-7975     | 1 |
| <i>circMAN2A1</i> | miR-7976     | 1 |
| <i>circMAN2A1</i> | miR-7977     | 1 |
| <i>circMAN2A1</i> | miR-802      | 1 |
| <i>circMAN2A1</i> | miR-8057     | 1 |
| <i>circMAN2A1</i> | miR-8062     | 1 |
| <i>circMAN2A1</i> | miR-8068     | 2 |
| <i>circMAN2A1</i> | miR-8070     | 2 |
| <i>circMAN2A1</i> | miR-8075     | 2 |
| <i>circMAN2A1</i> | miR-873-5p.1 | 2 |

|                   |                    |   |
|-------------------|--------------------|---|
| <i>circMAN2A1</i> | miR-875-3p         | 1 |
| <i>circMAN2A1</i> | miR-885-3p         | 1 |
| <i>circMAN2A1</i> | miR-885-5p         | 1 |
| <i>circMAN2A1</i> | miR-890            | 2 |
| <i>circMAN2A1</i> | miR-891a-3p        | 2 |
| <i>circMAN2A1</i> | miR-9-5p           | 2 |
| <i>circMAN2A1</i> | miR-922            | 1 |
| <i>circMAN2A1</i> | miR-93-3p          | 1 |
| <i>circMAN2A1</i> | miR-936            | 1 |
| <i>circMAN2A1</i> | miR-938            | 2 |
| <i>circMAN2A1</i> | miR-944            | 1 |
| <i>circMAN2A1</i> | miR-9500           | 1 |
| <i>circMAN2A1</i> | miR-96-3p          | 2 |
| <i>circMAN2A1</i> | miR-1229-3p        | 1 |
| <i>circMAN2A1</i> | miR-1236-3p        | 1 |
| <i>circMAN2A1</i> | miR-125-5p         | 1 |
| <i>circMAN2A1</i> | miR-1470           | 1 |
| <i>circMAN2A1</i> | miR-1587/3620-5p   | 1 |
| <i>circMAN2A1</i> | miR-182-3p         | 2 |
| <i>circMAN2A1</i> | miR-218-1-3p       | 2 |
| <i>circMAN2A1</i> | miR-218-2-3p       | 2 |
| <i>circMAN2A1</i> | miR-224-5p         | 2 |
| <i>circMAN2A1</i> | miR-26-5p          | 1 |
| <i>circMAN2A1</i> | miR-27a-5p         | 1 |
| <i>circMAN2A1</i> | miR-28-3p          | 1 |
| <i>circMAN2A1</i> | miR-335-3p         | 1 |
| <i>circMAN2A1</i> | miR-3688-3p        | 1 |
| <i>circMAN2A1</i> | miR-382-5p         | 1 |
| <i>circMAN2A1</i> | miR-412-3p/6754-3p | 1 |
| <i>circMAN2A1</i> | miR-4273/7156-5p   | 2 |
| <i>circMAN2A1</i> | miR-4287/4685-3p   | 1 |
| <i>circMAN2A1</i> | miR-4290           | 1 |
| <i>circMAN2A1</i> | miR-4312           | 1 |
| <i>circMAN2A1</i> | miR-4469           | 1 |
| <i>circMAN2A1</i> | miR-4485-5p        | 1 |
| <i>circMAN2A1</i> | miR-4503           | 1 |
| <i>circMAN2A1</i> | miR-4537           | 1 |
| <i>circMAN2A1</i> | miR-4632-3p        | 1 |



|                   |                                       |   |
|-------------------|---------------------------------------|---|
| <i>circMAN2A1</i> | miR-4667-3p                           | 1 |
| <i>circMAN2A1</i> | miR-4674                              | 1 |
| <i>circMAN2A1</i> | miR-4677-5p                           | 2 |
| <i>circMAN2A1</i> | miR-4694-5p                           | 4 |
| <i>circMAN2A1</i> | miR-4724-3p                           | 3 |
| <i>circMAN2A1</i> | miR-4732-3p                           | 1 |
| <i>circMAN2A1</i> | miR-4786-3p                           | 1 |
| <i>circMAN2A1</i> | miR-490-5p                            | 1 |
| <i>circMAN2A1</i> | miR-495-5p                            | 1 |
| <i>circMAN2A1</i> | miR-520g-5p                           | 1 |
| <i>circMAN2A1</i> | miR-573/3616-5p                       | 1 |
| <i>circMAN2A1</i> | miR-6084                              | 1 |
| <i>circMAN2A1</i> | miR-6134                              | 1 |
| <i>circMAN2A1</i> | miR-6505-5p                           | 1 |
| <i>circMAN2A1</i> | miR-6515-3p                           | 1 |
| <i>circMAN2A1</i> | miR-659-3p                            | 1 |
| <i>circMAN2A1</i> | miR-670-5p                            | 1 |
| <i>circMAN2A1</i> | miR-6739-3p                           | 2 |
| <i>circMAN2A1</i> | miR-6746-3p                           | 1 |
| <i>circMAN2A1</i> | miR-6780a-3p                          | 1 |
| <i>circMAN2A1</i> | miR-6796-3p                           | 1 |
| <i>circMAN2A1</i> | miR-6837-3p                           | 1 |
| <i>circMAN2A1</i> | miR-6880-3p                           | 1 |
| <i>circMAN2A1</i> | miR-6881-3p                           | 1 |
| <i>circMAN2A1</i> | miR-7111-3p                           | 1 |
| <i>circMAN2A1</i> | miR-7113-3p                           | 1 |
| <i>circMAN2A1</i> | miR-718                               | 2 |
| <i>circMAN2A1</i> | miR-7854-3p                           | 1 |
| <i>circMAN2A1</i> | miR-99-3p                             | 1 |
| <i>circMAN2A1</i> | let-7-5p/98-5p                        | 1 |
| <i>circMAN2A1</i> | let-7a-3p/let-7b-3p/let-7f-1-3p/98-3p | 2 |
| <i>circMAN2A1</i> | let-7f-2-3p/1185-3p                   | 2 |
| <i>circMAN2A1</i> | miR-10b-3p                            | 1 |
| <i>circMAN2A1</i> | miR-1200                              | 1 |
| <i>circMAN2A1</i> | miR-1208                              | 1 |
| <i>circMAN2A1</i> | miR-1251-5p                           | 1 |
| <i>circMAN2A1</i> | miR-1256                              | 1 |
| <i>circMAN2A1</i> | miR-1257                              | 1 |

|                   |                                     |   |
|-------------------|-------------------------------------|---|
| <i>circMAN2A1</i> | miR-1273g-5p                        | 1 |
| <i>circMAN2A1</i> | miR-1276                            | 1 |
| <i>circMAN2A1</i> | miR-1295b-3p                        | 1 |
| <i>circMAN2A1</i> | miR-130b-5p                         | 1 |
| <i>circMAN2A1</i> | miR-140-5p                          | 1 |
| <i>circMAN2A1</i> | miR-141-3p/200-3p                   | 1 |
| <i>circMAN2A1</i> | miR-142-3p.2                        | 1 |
| <i>circMAN2A1</i> | miR-148b-5p/6874-3p                 | 1 |
| <i>circMAN2A1</i> | miR-153-5p                          | 2 |
| <i>circMAN2A1</i> | miR-1537-3p                         | 1 |
| <i>circMAN2A1</i> | miR-154-3p/487-3p                   | 1 |
| <i>circMAN2A1</i> | miR-16-1-3p                         | 1 |
| <i>circMAN2A1</i> | miR-182-5p                          | 1 |
| <i>circMAN2A1</i> | miR-191-3p                          | 1 |
| <i>circMAN2A1</i> | miR-194-5p                          | 1 |
| <i>circMAN2A1</i> | miR-196-5p                          | 1 |
| <i>circMAN2A1</i> | miR-203a-5p                         | 1 |
| <i>circMAN2A1</i> | miR-2117                            | 1 |
| <i>circMAN2A1</i> | miR-218-5p                          | 1 |
| <i>circMAN2A1</i> | miR-222-5p                          | 1 |
| <i>circMAN2A1</i> | miR-23-3p                           | 1 |
| <i>circMAN2A1</i> | miR-23-5p                           | 1 |
| <i>circMAN2A1</i> | miR-25-3p/32-5p/92-3p/363-3p/367-3p | 2 |
| <i>circMAN2A1</i> | miR-297                             | 1 |
| <i>circMAN2A1</i> | miR-3064-5p                         | 1 |
| <i>circMAN2A1</i> | miR-3140-5p                         | 1 |
| <i>circMAN2A1</i> | miR-3143                            | 1 |
| <i>circMAN2A1</i> | miR-3144-3p                         | 1 |
| <i>circMAN2A1</i> | miR-3152-3p                         | 1 |
| <i>circMAN2A1</i> | miR-3159                            | 1 |
| <i>circMAN2A1</i> | miR-3168                            | 1 |
| <i>circMAN2A1</i> | miR-3173-3p/6891-5p                 | 1 |
| <i>circMAN2A1</i> | miR-330-3p.2                        | 1 |
| <i>circMAN2A1</i> | miR-342-3p                          | 1 |
| <i>circMAN2A1</i> | miR-345-3p                          | 1 |
| <i>circMAN2A1</i> | miR-34a-3p                          | 1 |
| <i>circMAN2A1</i> | miR-3614-5p                         | 1 |
| <i>circMAN2A1</i> | miR-3617-3p                         | 1 |

|                   |                           |   |
|-------------------|---------------------------|---|
| <i>circMAN2A1</i> | miR-3660/4526             | 1 |
| <i>circMAN2A1</i> | miR-3664-5p               | 1 |
| <i>circMAN2A1</i> | miR-3667-3p               | 1 |
| <i>circMAN2A1</i> | miR-3672/6864-3p          | 1 |
| <i>circMAN2A1</i> | miR-3682-5p               | 2 |
| <i>circMAN2A1</i> | miR-3684                  | 1 |
| <i>circMAN2A1</i> | miR-3713                  | 1 |
| <i>circMAN2A1</i> | miR-374a-3p               | 1 |
| <i>circMAN2A1</i> | miR-376c-3p               | 1 |
| <i>circMAN2A1</i> | miR-378a-5p               | 1 |
| <i>circMAN2A1</i> | miR-381-3p                | 1 |
| <i>circMAN2A1</i> | miR-382-3p                | 2 |
| <i>circMAN2A1</i> | miR-3920                  | 1 |
| <i>circMAN2A1</i> | miR-3927-3p/6831-5p       | 1 |
| <i>circMAN2A1</i> | miR-3929/4419b/4478       | 1 |
| <i>circMAN2A1</i> | miR-4256                  | 1 |
| <i>circMAN2A1</i> | miR-4263                  | 1 |
| <i>circMAN2A1</i> | miR-4271/4725-3p/6780b-5p | 1 |
| <i>circMAN2A1</i> | miR-4282                  | 3 |
| <i>circMAN2A1</i> | miR-4311                  | 1 |
| <i>circMAN2A1</i> | miR-4325                  | 1 |
| <i>circMAN2A1</i> | miR-4328                  | 1 |
| <i>circMAN2A1</i> | miR-4422                  | 1 |
| <i>circMAN2A1</i> | miR-4423-3p               | 1 |
| <i>circMAN2A1</i> | miR-4428                  | 1 |
| <i>circMAN2A1</i> | miR-4433b-3p              | 1 |
| <i>circMAN2A1</i> | miR-4522                  | 1 |
| <i>circMAN2A1</i> | miR-4536-5p               | 1 |
| <i>circMAN2A1</i> | miR-455-5p                | 1 |
| <i>circMAN2A1</i> | miR-4639-3p               | 1 |
| <i>circMAN2A1</i> | miR-4653-3p               | 1 |
| <i>circMAN2A1</i> | miR-4666a-3p              | 1 |
| <i>circMAN2A1</i> | miR-4671-5p               | 1 |
| <i>circMAN2A1</i> | miR-4687-3p               | 1 |
| <i>circMAN2A1</i> | miR-4699-3p               | 2 |
| <i>circMAN2A1</i> | miR-4714-5p               | 1 |
| <i>circMAN2A1</i> | miR-4729                  | 2 |
| <i>circMAN2A1</i> | miR-4730                  | 1 |

|                   |                     |   |
|-------------------|---------------------|---|
| <i>circMAN2A1</i> | miR-4746-3p         | 1 |
| <i>circMAN2A1</i> | miR-4753-3p         | 1 |
| <i>circMAN2A1</i> | miR-4761-5p         | 1 |
| <i>circMAN2A1</i> | miR-4768-5p/6833-3p | 1 |
| <i>circMAN2A1</i> | miR-4773            | 1 |
| <i>circMAN2A1</i> | miR-4786-5p         | 1 |
| <i>circMAN2A1</i> | miR-4789-5p         | 2 |
| <i>circMAN2A1</i> | miR-4802-3p         | 1 |
| <i>circMAN2A1</i> | miR-4803            | 1 |
| <i>circMAN2A1</i> | miR-486-5p          | 1 |
| <i>circMAN2A1</i> | miR-495-3p          | 1 |
| <i>circMAN2A1</i> | miR-497-3p          | 2 |
| <i>circMAN2A1</i> | miR-505-5p          | 1 |
| <i>circMAN2A1</i> | miR-511-3p          | 1 |
| <i>circMAN2A1</i> | miR-514a-5p         | 1 |
| <i>circMAN2A1</i> | miR-517-5p          | 1 |
| <i>circMAN2A1</i> | miR-5197-5p         | 1 |
| <i>circMAN2A1</i> | miR-542-5p          | 1 |
| <i>circMAN2A1</i> | miR-548ao-5p/548ax  | 1 |
| <i>circMAN2A1</i> | miR-552-3p          | 1 |
| <i>circMAN2A1</i> | miR-5584-3p         | 1 |
| <i>circMAN2A1</i> | miR-5585-5p         | 1 |
| <i>circMAN2A1</i> | miR-5587-5p         | 1 |
| <i>circMAN2A1</i> | miR-5684            | 1 |
| <i>circMAN2A1</i> | miR-5696            | 2 |
| <i>circMAN2A1</i> | miR-572             | 1 |
| <i>circMAN2A1</i> | miR-576-5p          | 1 |
| <i>circMAN2A1</i> | miR-579-3p          | 2 |
| <i>circMAN2A1</i> | miR-583             | 1 |
| <i>circMAN2A1</i> | miR-584-5p          | 1 |
| <i>circMAN2A1</i> | miR-592             | 1 |
| <i>circMAN2A1</i> | miR-599             | 1 |
| <i>circMAN2A1</i> | miR-6074            | 1 |
| <i>circMAN2A1</i> | miR-624-3p          | 1 |
| <i>circMAN2A1</i> | miR-641/3617-5p     | 1 |
| <i>circMAN2A1</i> | miR-6500-3p         | 1 |
| <i>circMAN2A1</i> | miR-652-3p          | 1 |
| <i>circMAN2A1</i> | miR-668-3p          | 2 |

|                   |                     |   |
|-------------------|---------------------|---|
| <i>circMAN2A1</i> | miR-6715a-3p        | 2 |
| <i>circMAN2A1</i> | miR-6719-3p         | 1 |
| <i>circMAN2A1</i> | miR-6727-5p         | 1 |
| <i>circMAN2A1</i> | miR-6730-3p         | 1 |
| <i>circMAN2A1</i> | miR-6734-3p         | 1 |
| <i>circMAN2A1</i> | miR-675-3p          | 1 |
| <i>circMAN2A1</i> | miR-6750-3p         | 1 |
| <i>circMAN2A1</i> | miR-6760-3p         | 1 |
| <i>circMAN2A1</i> | miR-6770-3p         | 1 |
| <i>circMAN2A1</i> | miR-6777-5p/6889-5p | 1 |
| <i>circMAN2A1</i> | miR-6806-5p         | 1 |
| <i>circMAN2A1</i> | miR-6809-3p         | 1 |
| <i>circMAN2A1</i> | miR-6825-3p         | 1 |
| <i>circMAN2A1</i> | miR-6869-5p         | 1 |
| <i>circMAN2A1</i> | miR-6884-3p         | 1 |
| <i>circMAN2A1</i> | miR-6885-3p         | 2 |
| <i>circMAN2A1</i> | miR-764             | 1 |
| <i>circMAN2A1</i> | miR-769-5p          | 1 |
| <i>circMAN2A1</i> | miR-7703            | 1 |
| <i>circMAN2A1</i> | miR-7974            | 1 |
| <i>circMAN2A1</i> | miR-8060            | 2 |
| <i>circMAN2A1</i> | miR-935             | 1 |
| <i>circMAN2A1</i> | miR-942-5p          | 1 |
| <i>circMAN2A1</i> | miR-96-5p/1271-5p   | 1 |
| <i>circMAN2A1</i> | miR-214-5p          | 1 |
| <i>circMAN2A1</i> | miR-3152-5p         | 1 |
| <i>circMAN2A1</i> | miR-4774-3p         | 1 |
| <i>circMAN2A1</i> | miR-6514-3p         | 1 |
| <i>circMAN2A1</i> | miR-6811-3p         | 1 |
| <i>circMAN2A1</i> | miR-6894-3p         | 1 |
| <i>circMAN2A1</i> | miR-105-3p          | 1 |
| <i>circMAN2A1</i> | miR-106a-3p         | 1 |
| <i>circMAN2A1</i> | miR-1178-3p         | 2 |
| <i>circMAN2A1</i> | miR-1193            | 1 |
| <i>circMAN2A1</i> | miR-1199-5p/6751-3p | 1 |
| <i>circMAN2A1</i> | miR-1273e           | 1 |
| <i>circMAN2A1</i> | miR-1295a           | 1 |
| <i>circMAN2A1</i> | miR-1298-5p         | 1 |

|                   |                    |   |
|-------------------|--------------------|---|
| <i>circMAN2A1</i> | miR-1343-3p        | 2 |
| <i>circMAN2A1</i> | miR-15a-3p         | 1 |
| <i>circMAN2A1</i> | miR-16-2-3p/195-3p | 1 |
| <i>circMAN2A1</i> | miR-186-3p         | 1 |
| <i>circMAN2A1</i> | miR-190a-3p        | 1 |
| <i>circMAN2A1</i> | miR-2054           | 1 |
| <i>circMAN2A1</i> | miR-2115-3p        | 1 |
| <i>circMAN2A1</i> | miR-2278           | 1 |
| <i>circMAN2A1</i> | miR-26-3p          | 1 |
| <i>circMAN2A1</i> | miR-3074-3p        | 1 |
| <i>circMAN2A1</i> | miR-3119           | 1 |
| <i>circMAN2A1</i> | miR-3140-3p        | 1 |
| <i>circMAN2A1</i> | miR-3201/4791      | 1 |
| <i>circMAN2A1</i> | miR-338-5p         | 1 |
| <i>circMAN2A1</i> | miR-340-5p         | 1 |
| <i>circMAN2A1</i> | miR-3620-3p        | 2 |
| <i>circMAN2A1</i> | miR-3690           | 2 |
| <i>circMAN2A1</i> | miR-380-5p/563     | 1 |
| <i>circMAN2A1</i> | miR-3922-5p        | 1 |
| <i>circMAN2A1</i> | miR-3934-3p        | 1 |
| <i>circMAN2A1</i> | miR-3978           | 1 |
| <i>circMAN2A1</i> | miR-4254           | 2 |
| <i>circMAN2A1</i> | miR-4261           | 1 |
| <i>circMAN2A1</i> | miR-4264           | 1 |
| <i>circMAN2A1</i> | miR-4272           | 1 |
| <i>circMAN2A1</i> | miR-4274           | 1 |
| <i>circMAN2A1</i> | miR-4317           | 1 |
| <i>circMAN2A1</i> | miR-4468           | 2 |
| <i>circMAN2A1</i> | miR-450b-3p/769-3p | 1 |
| <i>circMAN2A1</i> | miR-4519           | 1 |
| <i>circMAN2A1</i> | miR-4529-5p        | 1 |
| <i>circMAN2A1</i> | miR-4666b          | 1 |
| <i>circMAN2A1</i> | miR-4709-3p        | 1 |
| <i>circMAN2A1</i> | miR-4717-5p        | 2 |
| <i>circMAN2A1</i> | miR-4738-3p        | 1 |
| <i>circMAN2A1</i> | miR-4753-5p        | 1 |
| <i>circMAN2A1</i> | miR-4797-3p        | 1 |
| <i>circMAN2A1</i> | miR-496.2          | 1 |

|                   |                     |   |
|-------------------|---------------------|---|
| <i>circMAN2A1</i> | miR-5011-3p         | 1 |
| <i>circMAN2A1</i> | miR-5089-5p         | 1 |
| <i>circMAN2A1</i> | miR-5191            | 1 |
| <i>circMAN2A1</i> | miR-5195-5p         | 1 |
| <i>circMAN2A1</i> | miR-5591-3p         | 1 |
| <i>circMAN2A1</i> | miR-561-5p          | 1 |
| <i>circMAN2A1</i> | miR-5704            | 1 |
| <i>circMAN2A1</i> | miR-590-3p          | 1 |
| <i>circMAN2A1</i> | miR-6076/6797-3p    | 1 |
| <i>circMAN2A1</i> | miR-6509-5p         | 1 |
| <i>circMAN2A1</i> | miR-660-5p          | 1 |
| <i>circMAN2A1</i> | miR-6728-5p         | 1 |
| <i>circMAN2A1</i> | miR-6731-3p         | 1 |
| <i>circMAN2A1</i> | miR-6740-5p         | 1 |
| <i>circMAN2A1</i> | miR-6758-5p/6856-5p | 1 |
| <i>circMAN2A1</i> | miR-6771-3p         | 1 |
| <i>circMAN2A1</i> | miR-6801-5p         | 1 |
| <i>circMAN2A1</i> | miR-7158-5p         | 1 |
| <i>circMAN2A1</i> | miR-758-5p          | 1 |
| <i>circMAP7</i>   | miR-103-3p/107      | 1 |
| <i>circMAP7</i>   | miR-1184            | 1 |
| <i>circMAP7</i>   | miR-1200            | 1 |
| <i>circMAP7</i>   | miR-1205            | 1 |
| <i>circMAP7</i>   | miR-1207-3p         | 2 |
| <i>circMAP7</i>   | miR-1231            | 1 |
| <i>circMAP7</i>   | miR-1233-3p         | 2 |
| <i>circMAP7</i>   | miR-1236-3p         | 2 |
| <i>circMAP7</i>   | miR-1247-5p         | 1 |
| <i>circMAP7</i>   | miR-1249-5p/6797-5p | 1 |
| <i>circMAP7</i>   | miR-1252-5p         | 1 |
| <i>circMAP7</i>   | miR-1253            | 4 |
| <i>circMAP7</i>   | miR-1267            | 2 |
| <i>circMAP7</i>   | miR-1270            | 1 |
| <i>circMAP7</i>   | miR-1273g-5p        | 1 |
| <i>circMAP7</i>   | miR-1276            | 1 |
| <i>circMAP7</i>   | miR-128-3p          | 2 |
| <i>circMAP7</i>   | miR-129-3p          | 2 |
| <i>circMAP7</i>   | miR-1299            | 1 |

|                 |                                      |   |
|-----------------|--------------------------------------|---|
| <i>circMAP7</i> | miR-130-3p/301-3p/454-3p             | 2 |
| <i>circMAP7</i> | miR-1301-3p                          | 3 |
| <i>circMAP7</i> | miR-1323                             | 2 |
| <i>circMAP7</i> | miR-1324                             | 1 |
| <i>circMAP7</i> | miR-133a-3p.2/133b                   | 2 |
| <i>circMAP7</i> | miR-1343-3p                          | 1 |
| <i>circMAP7</i> | miR-136-5p                           | 2 |
| <i>circMAP7</i> | miR-140-3p.1                         | 2 |
| <i>circMAP7</i> | miR-140-5p                           | 1 |
| <i>circMAP7</i> | miR-142-3p.2                         | 1 |
| <i>circMAP7</i> | miR-145-3p                           | 1 |
| <i>circMAP7</i> | miR-148-3p/152-3p                    | 2 |
| <i>circMAP7</i> | miR-149-3p/4728-5p/6785-5p/6883-5p   | 2 |
| <i>circMAP7</i> | miR-15-5p/16-5p/195-5p/424-5p/497-5p | 1 |
| <i>circMAP7</i> | miR-17-3p                            | 1 |
| <i>circMAP7</i> | miR-181-5p                           | 1 |
| <i>circMAP7</i> | miR-1827                             | 2 |
| <i>circMAP7</i> | miR-185-5p                           | 1 |
| <i>circMAP7</i> | miR-18b-3p                           | 2 |
| <i>circMAP7</i> | miR-1910-3p/6511a-5p                 | 3 |
| <i>circMAP7</i> | miR-1911-3p                          | 1 |
| <i>circMAP7</i> | miR-1976                             | 1 |
| <i>circMAP7</i> | miR-203a-5p                          | 1 |
| <i>circMAP7</i> | miR-2053                             | 1 |
| <i>circMAP7</i> | miR-2110                             | 2 |
| <i>circMAP7</i> | miR-22-3p                            | 2 |
| <i>circMAP7</i> | miR-221-5p/8073                      | 1 |
| <i>circMAP7</i> | miR-223-3p                           | 1 |
| <i>circMAP7</i> | miR-2276-3p                          | 2 |
| <i>circMAP7</i> | miR-2278                             | 1 |
| <i>circMAP7</i> | miR-2467-3p                          | 2 |
| <i>circMAP7</i> | miR-2467-5p                          | 2 |
| <i>circMAP7</i> | miR-26-3p                            | 1 |
| <i>circMAP7</i> | miR-28-5p/708-5p                     | 4 |
| <i>circMAP7</i> | miR-29-3p                            | 1 |
| <i>circMAP7</i> | miR-298                              | 2 |
| <i>circMAP7</i> | miR-302c-5p                          | 1 |
| <i>circMAP7</i> | miR-3065-3p                          | 1 |



|                 |                                              |   |
|-----------------|----------------------------------------------|---|
| <i>circMAP7</i> | miR-3074-5p                                  | 1 |
| <i>circMAP7</i> | miR-30b-3p/1273h-5p/3689-3p/6779-5p/6780a-5p | 3 |
| <i>circMAP7</i> | miR-30c-3p/6788-5p                           | 3 |
| <i>circMAP7</i> | miR-3121-3p                                  | 1 |
| <i>circMAP7</i> | miR-3123                                     | 3 |
| <i>circMAP7</i> | miR-3125/3916/6859-5p                        | 1 |
| <i>circMAP7</i> | miR-3150a-3p                                 | 2 |
| <i>circMAP7</i> | miR-3150b-3p                                 | 4 |
| <i>circMAP7</i> | miR-3151-5p                                  | 2 |
| <i>circMAP7</i> | miR-3154                                     | 1 |
| <i>circMAP7</i> | miR-3157-5p                                  | 1 |
| <i>circMAP7</i> | miR-3158-3p                                  | 1 |
| <i>circMAP7</i> | miR-3158-5p                                  | 1 |
| <i>circMAP7</i> | miR-3173-3p/6891-5p                          | 3 |
| <i>circMAP7</i> | miR-3175                                     | 2 |
| <i>circMAP7</i> | miR-3176/3922-3p                             | 1 |
| <i>circMAP7</i> | miR-3185                                     | 1 |
| <i>circMAP7</i> | miR-3187-3p                                  | 1 |
| <i>circMAP7</i> | miR-3188                                     | 2 |
| <i>circMAP7</i> | miR-3190-5p                                  | 1 |
| <i>circMAP7</i> | miR-320e                                     | 2 |
| <i>circMAP7</i> | miR-324-5p                                   | 2 |
| <i>circMAP7</i> | miR-329-5p                                   | 1 |
| <i>circMAP7</i> | miR-330-3p.2                                 | 1 |
| <i>circMAP7</i> | miR-335-5p                                   | 1 |
| <i>circMAP7</i> | miR-34b-5p/449c-5p                           | 3 |
| <i>circMAP7</i> | miR-3612                                     | 3 |
| <i>circMAP7</i> | miR-3613-5p                                  | 2 |
| <i>circMAP7</i> | miR-3616-3p                                  | 1 |
| <i>circMAP7</i> | miR-3622a-3p/3622b-3p                        | 1 |
| <i>circMAP7</i> | miR-3653-5p                                  | 1 |
| <i>circMAP7</i> | miR-3655                                     | 1 |
| <i>circMAP7</i> | miR-367-5p                                   | 2 |
| <i>circMAP7</i> | miR-3677-3p                                  | 2 |
| <i>circMAP7</i> | miR-3688-3p                                  | 2 |
| <i>circMAP7</i> | miR-3690                                     | 1 |
| <i>circMAP7</i> | miR-3692-3p                                  | 1 |
| <i>circMAP7</i> | miR-3692-5p                                  | 1 |

|                 |                     |   |
|-----------------|---------------------|---|
| <i>circMAP7</i> | miR-374b-3p         | 1 |
| <i>circMAP7</i> | miR-377-5p/6086     | 1 |
| <i>circMAP7</i> | miR-378a-5p         | 1 |
| <i>circMAP7</i> | miR-383-3p          | 1 |
| <i>circMAP7</i> | miR-3908            | 1 |
| <i>circMAP7</i> | miR-3911            | 1 |
| <i>circMAP7</i> | miR-3914            | 2 |
| <i>circMAP7</i> | miR-3919            | 1 |
| <i>circMAP7</i> | miR-3925-3p         | 1 |
| <i>circMAP7</i> | miR-3925-5p         | 3 |
| <i>circMAP7</i> | miR-3928-3p         | 1 |
| <i>circMAP7</i> | miR-3928-5p/6806-3p | 2 |
| <i>circMAP7</i> | miR-3934-3p         | 1 |
| <i>circMAP7</i> | miR-3937            | 1 |
| <i>circMAP7</i> | miR-3942-5p         | 1 |
| <i>circMAP7</i> | miR-3944-5p         | 2 |
| <i>circMAP7</i> | miR-3975            | 2 |
| <i>circMAP7</i> | miR-3976            | 1 |
| <i>circMAP7</i> | miR-3978            | 2 |
| <i>circMAP7</i> | miR-409-3p          | 1 |
| <i>circMAP7</i> | miR-4254            | 1 |
| <i>circMAP7</i> | miR-4257            | 1 |
| <i>circMAP7</i> | miR-4269/6715b-5p   | 1 |
| <i>circMAP7</i> | miR-4279            | 1 |
| <i>circMAP7</i> | miR-4311            | 1 |
| <i>circMAP7</i> | miR-4312            | 1 |
| <i>circMAP7</i> | miR-4326            | 1 |
| <i>circMAP7</i> | miR-4328            | 1 |
| <i>circMAP7</i> | miR-4422            | 1 |
| <i>circMAP7</i> | miR-4428            | 3 |
| <i>circMAP7</i> | miR-4434/4516/5703  | 2 |
| <i>circMAP7</i> | miR-4435            | 1 |
| <i>circMAP7</i> | miR-4438            | 1 |
| <i>circMAP7</i> | miR-4440            | 2 |
| <i>circMAP7</i> | miR-4443            | 2 |
| <i>circMAP7</i> | miR-4446-3p         | 1 |
| <i>circMAP7</i> | miR-4447/4472       | 2 |
| <i>circMAP7</i> | miR-4468            | 2 |

|                 |                  |   |
|-----------------|------------------|---|
| <i>circMAP7</i> | miR-4482-3p      | 1 |
| <i>circMAP7</i> | miR-4485-5p      | 1 |
| <i>circMAP7</i> | miR-4494         | 1 |
| <i>circMAP7</i> | miR-451          | 2 |
| <i>circMAP7</i> | miR-4514/4692    | 1 |
| <i>circMAP7</i> | miR-4517         | 1 |
| <i>circMAP7</i> | miR-451b         | 2 |
| <i>circMAP7</i> | miR-452-3p       | 1 |
| <i>circMAP7</i> | miR-4521         | 1 |
| <i>circMAP7</i> | miR-4524b-3p     | 1 |
| <i>circMAP7</i> | miR-4531         | 1 |
| <i>circMAP7</i> | miR-4632-3p      | 1 |
| <i>circMAP7</i> | miR-4641         | 1 |
| <i>circMAP7</i> | miR-4643         | 1 |
| <i>circMAP7</i> | miR-4645-5p/4673 | 1 |
| <i>circMAP7</i> | miR-4656         | 1 |
| <i>circMAP7</i> | miR-4660         | 3 |
| <i>circMAP7</i> | miR-4675/4741    | 1 |
| <i>circMAP7</i> | miR-4686         | 1 |
| <i>circMAP7</i> | miR-4687-5p      | 2 |
| <i>circMAP7</i> | miR-4690-3p/5685 | 1 |
| <i>circMAP7</i> | miR-4695-5p      | 2 |
| <i>circMAP7</i> | miR-4696         | 1 |
| <i>circMAP7</i> | miR-4697-3p      | 1 |
| <i>circMAP7</i> | miR-4721         | 1 |
| <i>circMAP7</i> | miR-4742-5p      | 1 |
| <i>circMAP7</i> | miR-4752         | 1 |
| <i>circMAP7</i> | miR-4755-3p      | 1 |
| <i>circMAP7</i> | miR-4756-3p      | 1 |
| <i>circMAP7</i> | miR-4763-5p      | 1 |
| <i>circMAP7</i> | miR-4766-3p      | 1 |
| <i>circMAP7</i> | miR-4772-3p      | 2 |
| <i>circMAP7</i> | miR-4779         | 2 |
| <i>circMAP7</i> | miR-4781-3p      | 1 |
| <i>circMAP7</i> | miR-4782-5p/5706 | 1 |
| <i>circMAP7</i> | miR-4786-3p      | 2 |
| <i>circMAP7</i> | miR-4789-3p      | 1 |
| <i>circMAP7</i> | miR-483-3p.1     | 1 |

|                 |                     |   |
|-----------------|---------------------|---|
| <i>circMAP7</i> | miR-485-5p          | 2 |
| <i>circMAP7</i> | miR-487a-5p/487b-5p | 1 |
| <i>circMAP7</i> | miR-488-5p          | 1 |
| <i>circMAP7</i> | miR-491-5p          | 2 |
| <i>circMAP7</i> | miR-4999-3p         | 1 |
| <i>circMAP7</i> | miR-499b-5p         | 1 |
| <i>circMAP7</i> | miR-503-5p          | 1 |
| <i>circMAP7</i> | miR-504-3p          | 1 |
| <i>circMAP7</i> | miR-5088-5p         | 1 |
| <i>circMAP7</i> | miR-5092            | 2 |
| <i>circMAP7</i> | miR-515-5p/519e-5p  | 3 |
| <i>circMAP7</i> | miR-516b-5p         | 1 |
| <i>circMAP7</i> | miR-5192            | 1 |
| <i>circMAP7</i> | miR-5197-3p         | 2 |
| <i>circMAP7</i> | miR-525-5p          | 2 |
| <i>circMAP7</i> | miR-539-5p          | 1 |
| <i>circMAP7</i> | miR-548ao-5p/548ax  | 1 |
| <i>circMAP7</i> | miR-548e-5p         | 1 |
| <i>circMAP7</i> | miR-548s            | 1 |
| <i>circMAP7</i> | miR-5571-5p         | 1 |
| <i>circMAP7</i> | miR-5581-3p         | 2 |
| <i>circMAP7</i> | miR-5583-3p         | 1 |
| <i>circMAP7</i> | miR-5585-5p         | 1 |
| <i>circMAP7</i> | miR-5586-5p         | 1 |
| <i>circMAP7</i> | miR-5680            | 1 |
| <i>circMAP7</i> | miR-5681a           | 2 |
| <i>circMAP7</i> | miR-575/4676-5p     | 3 |
| <i>circMAP7</i> | miR-583             | 1 |
| <i>circMAP7</i> | miR-587             | 1 |
| <i>circMAP7</i> | miR-588             | 1 |
| <i>circMAP7</i> | miR-604             | 1 |
| <i>circMAP7</i> | miR-6077            | 2 |
| <i>circMAP7</i> | miR-6078            | 1 |
| <i>circMAP7</i> | miR-6079            | 1 |
| <i>circMAP7</i> | miR-6081            | 1 |
| <i>circMAP7</i> | miR-6090            | 2 |
| <i>circMAP7</i> | miR-6125            | 1 |
| <i>circMAP7</i> | miR-6128            | 1 |

|                 |                  |   |
|-----------------|------------------|---|
| <i>circMAP7</i> | miR-614          | 2 |
| <i>circMAP7</i> | miR-616-3p       | 1 |
| <i>circMAP7</i> | miR-619-3p       | 1 |
| <i>circMAP7</i> | miR-629-3p       | 1 |
| <i>circMAP7</i> | miR-632/4288     | 1 |
| <i>circMAP7</i> | miR-640          | 1 |
| <i>circMAP7</i> | miR-644a         | 1 |
| <i>circMAP7</i> | miR-646          | 1 |
| <i>circMAP7</i> | miR-648          | 1 |
| <i>circMAP7</i> | miR-651-3p       | 1 |
| <i>circMAP7</i> | miR-6515-3p      | 2 |
| <i>circMAP7</i> | miR-6515-5p      | 2 |
| <i>circMAP7</i> | miR-655-5p       | 1 |
| <i>circMAP7</i> | miR-658          | 2 |
| <i>circMAP7</i> | miR-6722-5p      | 2 |
| <i>circMAP7</i> | miR-6730-5p      | 2 |
| <i>circMAP7</i> | miR-6731-3p      | 1 |
| <i>circMAP7</i> | miR-6731-5p/8085 | 1 |
| <i>circMAP7</i> | miR-6736-3p      | 2 |
| <i>circMAP7</i> | miR-6741-3p      | 1 |
| <i>circMAP7</i> | miR-6742-5p      | 2 |
| <i>circMAP7</i> | miR-676-5p       | 1 |
| <i>circMAP7</i> | miR-6762-3p      | 1 |
| <i>circMAP7</i> | miR-6765-3p      | 1 |
| <i>circMAP7</i> | miR-6770-5p      | 4 |
| <i>circMAP7</i> | miR-6779-3p      | 2 |
| <i>circMAP7</i> | miR-6780a-3p     | 1 |
| <i>circMAP7</i> | miR-6786-3p      | 1 |
| <i>circMAP7</i> | miR-6787-3p      | 1 |
| <i>circMAP7</i> | miR-6799-5p      | 2 |
| <i>circMAP7</i> | miR-6801-5p      | 1 |
| <i>circMAP7</i> | miR-6804-3p      | 1 |
| <i>circMAP7</i> | miR-6810-5p      | 2 |
| <i>circMAP7</i> | miR-6817-3p      | 2 |
| <i>circMAP7</i> | miR-6822-3p      | 3 |
| <i>circMAP7</i> | miR-6825-5p      | 2 |
| <i>circMAP7</i> | miR-6829-5p      | 1 |
| <i>circMAP7</i> | miR-6833-5p      | 1 |

|                 |                              |   |
|-----------------|------------------------------|---|
| <i>circMAP7</i> | miR-6845-3p                  | 3 |
| <i>circMAP7</i> | miR-6847-5p                  | 1 |
| <i>circMAP7</i> | miR-6854-5p                  | 1 |
| <i>circMAP7</i> | miR-6857-5p                  | 2 |
| <i>circMAP7</i> | miR-6858-3p                  | 3 |
| <i>circMAP7</i> | miR-6866-5p                  | 1 |
| <i>circMAP7</i> | miR-6871-3p                  | 1 |
| <i>circMAP7</i> | miR-6871-5p                  | 3 |
| <i>circMAP7</i> | miR-6873-3p                  | 2 |
| <i>circMAP7</i> | miR-6878-5p                  | 1 |
| <i>circMAP7</i> | miR-6881-3p                  | 1 |
| <i>circMAP7</i> | miR-6882-3p                  | 1 |
| <i>circMAP7</i> | miR-6888-5p                  | 1 |
| <i>circMAP7</i> | miR-6894-5p                  | 4 |
| <i>circMAP7</i> | miR-7-5p                     | 2 |
| <i>circMAP7</i> | miR-7106-5p                  | 2 |
| <i>circMAP7</i> | miR-7110-3p                  | 2 |
| <i>circMAP7</i> | miR-7111-3p                  | 1 |
| <i>circMAP7</i> | miR-7114-5p                  | 1 |
| <i>circMAP7</i> | miR-7152-5p                  | 1 |
| <i>circMAP7</i> | miR-7153-3p                  | 1 |
| <i>circMAP7</i> | miR-7154-3p                  | 4 |
| <i>circMAP7</i> | miR-7156-3p                  | 3 |
| <i>circMAP7</i> | miR-7159-3p                  | 1 |
| <i>circMAP7</i> | miR-760                      | 3 |
| <i>circMAP7</i> | miR-762/4492/4498/5001-5p    | 1 |
| <i>circMAP7</i> | miR-765                      | 4 |
| <i>circMAP7</i> | miR-766-3p                   | 1 |
| <i>circMAP7</i> | miR-766-5p                   | 4 |
| <i>circMAP7</i> | miR-7706                     | 1 |
| <i>circMAP7</i> | miR-7846-3p                  | 3 |
| <i>circMAP7</i> | miR-7847-3p                  | 1 |
| <i>circMAP7</i> | miR-7851-3p                  | 1 |
| <i>circMAP7</i> | miR-8060                     | 1 |
| <i>circMAP7</i> | miR-877-5p                   | 1 |
| <i>circMAP7</i> | miR-885-3p                   | 1 |
| <i>circMAP7</i> | miR-891b                     | 1 |
| <i>circMAP7</i> | miR-920/4300/5591-5p/6726-5p | 2 |

|                  |                          |   |
|------------------|--------------------------|---|
| <i>circMAP7</i>  | miR-92a-1-5p             | 1 |
| <i>circMAP7</i>  | miR-93-3p                | 1 |
| <i>circMAP7</i>  | miR-939-5p/1343-5p       | 2 |
| <i>circMAP7</i>  | miR-940/6808-5p/6893-5p  | 3 |
| <i>circMAP7</i>  | miR-1273h-3p             | 1 |
| <i>circMAP7</i>  | miR-1288-5p              | 1 |
| <i>circMAP7</i>  | miR-146-5p               | 1 |
| <i>circMAP7</i>  | miR-3678-3p              | 1 |
| <i>circMAP7</i>  | miR-589-5p               | 1 |
| <i>circMAP7</i>  | miR-217                  | 1 |
| <i>circMAP7</i>  | miR-4325                 | 1 |
| <i>circMAP7</i>  | miR-509-3-5p/509-5p/4418 | 1 |
| <i>circMAP7</i>  | miR-589-3p               | 1 |
| <i>circMAP7</i>  | miR-6890-3p              | 1 |
| <i>circMAP7</i>  | miR-7703                 | 1 |
| <i>circMAPK4</i> | miR-1-3p/206             | 3 |
| <i>circMAPK4</i> | miR-10-5p                | 1 |
| <i>circMAPK4</i> | miR-103-3p/107           | 4 |
| <i>circMAPK4</i> | miR-103a-2-5p            | 1 |
| <i>circMAPK4</i> | miR-105-5p               | 1 |
| <i>circMAPK4</i> | miR-1180-3p              | 1 |
| <i>circMAPK4</i> | miR-1183                 | 2 |
| <i>circMAPK4</i> | miR-1184                 | 3 |
| <i>circMAPK4</i> | miR-1193                 | 3 |
| <i>circMAPK4</i> | miR-1199-3p              | 1 |
| <i>circMAPK4</i> | miR-1199-5p/6751-3p      | 4 |
| <i>circMAPK4</i> | miR-1200                 | 1 |
| <i>circMAPK4</i> | miR-1202/3972            | 4 |
| <i>circMAPK4</i> | miR-1205                 | 3 |
| <i>circMAPK4</i> | miR-1207-3p              | 4 |
| <i>circMAPK4</i> | miR-1207-5p/4763-3p      | 1 |
| <i>circMAPK4</i> | miR-122-5p               | 2 |
| <i>circMAPK4</i> | miR-1224-3p              | 1 |
| <i>circMAPK4</i> | miR-1225-3p              | 3 |
| <i>circMAPK4</i> | miR-1226-3p              | 3 |
| <i>circMAPK4</i> | miR-1226-5p              | 1 |
| <i>circMAPK4</i> | miR-1227-3p              | 1 |
| <i>circMAPK4</i> | miR-1233-3p              | 2 |

|                  |                          |   |
|------------------|--------------------------|---|
| <i>circMAPK4</i> | miR-1233-5p/6778-5p      | 2 |
| <i>circMAPK4</i> | miR-1234-3p/7107-5p      | 1 |
| <i>circMAPK4</i> | miR-1236-3p              | 2 |
| <i>circMAPK4</i> | miR-1237-3p              | 2 |
| <i>circMAPK4</i> | miR-1237-5p/4488/4697-5p | 1 |
| <i>circMAPK4</i> | miR-124-5p               | 1 |
| <i>circMAPK4</i> | miR-1245a/8079           | 1 |
| <i>circMAPK4</i> | miR-1248                 | 2 |
| <i>circMAPK4</i> | miR-1249-5p/6797-5p      | 1 |
| <i>circMAPK4</i> | miR-1260a/1260b          | 1 |
| <i>circMAPK4</i> | miR-1263                 | 2 |
| <i>circMAPK4</i> | miR-1264                 | 2 |
| <i>circMAPK4</i> | miR-1266-3p              | 1 |
| <i>circMAPK4</i> | miR-1266-5p/4518         | 1 |
| <i>circMAPK4</i> | miR-1269                 | 1 |
| <i>circMAPK4</i> | miR-1270                 | 2 |
| <i>circMAPK4</i> | miR-1273d                | 1 |
| <i>circMAPK4</i> | miR-1273g-3p             | 2 |
| <i>circMAPK4</i> | miR-1273h-3p             | 1 |
| <i>circMAPK4</i> | miR-1275/4665-5p         | 1 |
| <i>circMAPK4</i> | miR-1279                 | 1 |
| <i>circMAPK4</i> | miR-1286                 | 2 |
| <i>circMAPK4</i> | miR-1287-5p              | 1 |
| <i>circMAPK4</i> | miR-1288-3p              | 1 |
| <i>circMAPK4</i> | miR-1294                 | 1 |
| <i>circMAPK4</i> | miR-1295b-5p/1912        | 1 |
| <i>circMAPK4</i> | miR-1298-3p              | 1 |
| <i>circMAPK4</i> | miR-1298-5p              | 1 |
| <i>circMAPK4</i> | miR-1299                 | 4 |
| <i>circMAPK4</i> | miR-1301-3p              | 2 |
| <i>circMAPK4</i> | miR-1301-5p/6502-5p      | 1 |
| <i>circMAPK4</i> | miR-1302/4298            | 1 |
| <i>circMAPK4</i> | miR-1306-5p              | 2 |
| <i>circMAPK4</i> | miR-1307-3p              | 1 |
| <i>circMAPK4</i> | miR-130b-5p              | 4 |
| <i>circMAPK4</i> | miR-1323                 | 1 |
| <i>circMAPK4</i> | miR-133a-3p.1            | 1 |
| <i>circMAPK4</i> | miR-133a-5p              | 2 |



|                  |                                      |   |
|------------------|--------------------------------------|---|
| <i>circMAPK4</i> | miR-134-3p                           | 4 |
| <i>circMAPK4</i> | miR-1343-3p                          | 1 |
| <i>circMAPK4</i> | miR-135-5p                           | 1 |
| <i>circMAPK4</i> | miR-136-5p                           | 1 |
| <i>circMAPK4</i> | miR-138-5p                           | 2 |
| <i>circMAPK4</i> | miR-143-5p                           | 1 |
| <i>circMAPK4</i> | miR-145-3p                           | 2 |
| <i>circMAPK4</i> | miR-146b-3p                          | 2 |
| <i>circMAPK4</i> | miR-1471                             | 2 |
| <i>circMAPK4</i> | miR-148-3p/152-3p                    | 1 |
| <i>circMAPK4</i> | miR-149-3p/4728-5p/6785-5p/6883-5p   | 1 |
| <i>circMAPK4</i> | miR-149-5p                           | 1 |
| <i>circMAPK4</i> | miR-15-5p/16-5p/195-5p/424-5p/497-5p | 2 |
| <i>circMAPK4</i> | miR-150-3p                           | 2 |
| <i>circMAPK4</i> | miR-1538/4745-3p                     | 1 |
| <i>circMAPK4</i> | miR-155-5p                           | 2 |
| <i>circMAPK4</i> | miR-1587/3620-5p                     | 1 |
| <i>circMAPK4</i> | miR-16-1-3p                          | 2 |
| <i>circMAPK4</i> | miR-17-3p                            | 3 |
| <i>circMAPK4</i> | miR-181-3p/4420                      | 1 |
| <i>circMAPK4</i> | miR-181d-3p                          | 1 |
| <i>circMAPK4</i> | miR-182-5p                           | 2 |
| <i>circMAPK4</i> | miR-1827                             | 1 |
| <i>circMAPK4</i> | miR-183-3p                           | 1 |
| <i>circMAPK4</i> | miR-183-5p.1                         | 1 |
| <i>circMAPK4</i> | miR-186-5p                           | 1 |
| <i>circMAPK4</i> | miR-188-3p                           | 1 |
| <i>circMAPK4</i> | miR-18a-3p                           | 1 |
| <i>circMAPK4</i> | miR-1908-3p                          | 1 |
| <i>circMAPK4</i> | miR-1908-5p                          | 3 |
| <i>circMAPK4</i> | miR-1909-3p/6722-3p                  | 2 |
| <i>circMAPK4</i> | miR-1911-3p                          | 2 |
| <i>circMAPK4</i> | miR-1914-5p                          | 3 |
| <i>circMAPK4</i> | miR-1915-3p/6764-5p                  | 2 |
| <i>circMAPK4</i> | miR-1915-5p                          | 2 |
| <i>circMAPK4</i> | miR-192-3p                           | 2 |
| <i>circMAPK4</i> | miR-193-3p                           | 1 |
| <i>circMAPK4</i> | miR-194-5p                           | 1 |

|                  |                     |   |
|------------------|---------------------|---|
| <i>circMAPK4</i> | miR-196b-3p         | 1 |
| <i>circMAPK4</i> | miR-197-3p          | 2 |
| <i>circMAPK4</i> | miR-1972            | 2 |
| <i>circMAPK4</i> | miR-1976            | 2 |
| <i>circMAPK4</i> | miR-198             | 1 |
| <i>circMAPK4</i> | miR-200-3p/429      | 1 |
| <i>circMAPK4</i> | miR-200c-5p/550a-3p | 1 |
| <i>circMAPK4</i> | miR-202-3p          | 1 |
| <i>circMAPK4</i> | miR-203a-3p.1       | 1 |
| <i>circMAPK4</i> | miR-203b-3p         | 1 |
| <i>circMAPK4</i> | miR-204-5p/211-5p   | 1 |
| <i>circMAPK4</i> | miR-20a-3p          | 1 |
| <i>circMAPK4</i> | miR-21-5p/590-5p    | 1 |
| <i>circMAPK4</i> | miR-2114-3p         | 1 |
| <i>circMAPK4</i> | miR-2114-5p         | 1 |
| <i>circMAPK4</i> | miR-212-5p          | 1 |
| <i>circMAPK4</i> | miR-214-3p/3619-5p  | 2 |
| <i>circMAPK4</i> | miR-215-3p          | 1 |
| <i>circMAPK4</i> | miR-217             | 3 |
| <i>circMAPK4</i> | miR-218-5p          | 3 |
| <i>circMAPK4</i> | miR-219a-1-3p       | 1 |
| <i>circMAPK4</i> | miR-22-3p           | 2 |
| <i>circMAPK4</i> | miR-223-3p          | 1 |
| <i>circMAPK4</i> | miR-223-5p          | 2 |
| <i>circMAPK4</i> | miR-224-5p          | 1 |
| <i>circMAPK4</i> | miR-2276-3p         | 1 |
| <i>circMAPK4</i> | miR-2277-3p         | 1 |
| <i>circMAPK4</i> | miR-23-5p           | 1 |
| <i>circMAPK4</i> | miR-2355-5p         | 2 |
| <i>circMAPK4</i> | miR-2392            | 3 |
| <i>circMAPK4</i> | miR-24-3p           | 2 |
| <i>circMAPK4</i> | miR-2467-5p         | 3 |
| <i>circMAPK4</i> | miR-25-5p           | 2 |
| <i>circMAPK4</i> | miR-26-5p           | 2 |
| <i>circMAPK4</i> | miR-2682-3p/6781-3p | 1 |
| <i>circMAPK4</i> | miR-27-3p           | 2 |
| <i>circMAPK4</i> | miR-27a-5p          | 3 |
| <i>circMAPK4</i> | miR-29-3p           | 3 |

|                  |                                              |   |
|------------------|----------------------------------------------|---|
| <i>circMAPK4</i> | miR-298                                      | 1 |
| <i>circMAPK4</i> | miR-299-3p                                   | 3 |
| <i>circMAPK4</i> | miR-29c-5p                                   | 1 |
| <i>circMAPK4</i> | miR-30-3p                                    | 2 |
| <i>circMAPK4</i> | miR-302a-5p                                  | 1 |
| <i>circMAPK4</i> | miR-3064-3p                                  | 2 |
| <i>circMAPK4</i> | miR-3064-5p                                  | 3 |
| <i>circMAPK4</i> | miR-3065-3p                                  | 3 |
| <i>circMAPK4</i> | miR-3065-5p                                  | 1 |
| <i>circMAPK4</i> | miR-3074-5p                                  | 2 |
| <i>circMAPK4</i> | miR-30b-3p/1273h-5p/3689-3p/6779-5p/6780a-5p | 3 |
| <i>circMAPK4</i> | miR-30c-3p/6788-5p                           | 3 |
| <i>circMAPK4</i> | miR-3117-5p                                  | 1 |
| <i>circMAPK4</i> | miR-3120-3p                                  | 1 |
| <i>circMAPK4</i> | miR-3120-5p                                  | 1 |
| <i>circMAPK4</i> | miR-3121-5p                                  | 2 |
| <i>circMAPK4</i> | miR-3122/3913-5p                             | 2 |
| <i>circMAPK4</i> | miR-3126-3p                                  | 1 |
| <i>circMAPK4</i> | miR-3126-5p                                  | 1 |
| <i>circMAPK4</i> | miR-3127-3p/6756-3p                          | 1 |
| <i>circMAPK4</i> | miR-3127-5p                                  | 1 |
| <i>circMAPK4</i> | miR-3128                                     | 1 |
| <i>circMAPK4</i> | miR-3130-3p                                  | 2 |
| <i>circMAPK4</i> | miR-3130-5p/4482-5p                          | 1 |
| <i>circMAPK4</i> | miR-3133                                     | 1 |
| <i>circMAPK4</i> | miR-3135b                                    | 1 |
| <i>circMAPK4</i> | miR-3138                                     | 1 |
| <i>circMAPK4</i> | miR-3140-5p                                  | 1 |
| <i>circMAPK4</i> | miR-3147                                     | 1 |
| <i>circMAPK4</i> | miR-3151-3p                                  | 2 |
| <i>circMAPK4</i> | miR-3156-3p                                  | 1 |
| <i>circMAPK4</i> | miR-3157-3p                                  | 3 |
| <i>circMAPK4</i> | miR-3157-5p                                  | 1 |
| <i>circMAPK4</i> | miR-3158-3p                                  | 1 |
| <i>circMAPK4</i> | miR-3158-5p                                  | 3 |
| <i>circMAPK4</i> | miR-3160-3p                                  | 3 |
| <i>circMAPK4</i> | miR-3171                                     | 3 |
| <i>circMAPK4</i> | miR-3173-5p                                  | 2 |

|                  |                           |   |
|------------------|---------------------------|---|
| <i>circMAPK4</i> | miR-3174                  | 1 |
| <i>circMAPK4</i> | miR-3175                  | 1 |
| <i>circMAPK4</i> | miR-3178                  | 1 |
| <i>circMAPK4</i> | miR-3180-3p               | 1 |
| <i>circMAPK4</i> | miR-3182                  | 2 |
| <i>circMAPK4</i> | miR-3183/4723-3p/6769b-3p | 1 |
| <i>circMAPK4</i> | miR-3184-3p               | 2 |
| <i>circMAPK4</i> | miR-3186-5p               | 1 |
| <i>circMAPK4</i> | miR-3188                  | 3 |
| <i>circMAPK4</i> | miR-3189-3p               | 1 |
| <i>circMAPK4</i> | miR-3191-5p               | 1 |
| <i>circMAPK4</i> | miR-3194-5p               | 2 |
| <i>circMAPK4</i> | miR-3195                  | 1 |
| <i>circMAPK4</i> | miR-320                   | 4 |
| <i>circMAPK4</i> | miR-320e                  | 2 |
| <i>circMAPK4</i> | miR-324-3p/1913           | 1 |
| <i>circMAPK4</i> | miR-324-5p                | 3 |
| <i>circMAPK4</i> | miR-326                   | 2 |
| <i>circMAPK4</i> | miR-329-5p                | 1 |
| <i>circMAPK4</i> | miR-33-5p                 | 1 |
| <i>circMAPK4</i> | miR-330-3p                | 2 |
| <i>circMAPK4</i> | miR-335-5p                | 4 |
| <i>circMAPK4</i> | miR-338-3p                | 2 |
| <i>circMAPK4</i> | miR-339-3p                | 1 |
| <i>circMAPK4</i> | miR-339-5p                | 2 |
| <i>circMAPK4</i> | miR-33b-3p/515-3p/519e-3p | 1 |
| <i>circMAPK4</i> | miR-34-5p/449-5p          | 1 |
| <i>circMAPK4</i> | miR-345-3p                | 1 |
| <i>circMAPK4</i> | miR-3606-5p               | 1 |
| <i>circMAPK4</i> | miR-3612                  | 1 |
| <i>circMAPK4</i> | miR-3614-3p               | 1 |
| <i>circMAPK4</i> | miR-3615                  | 1 |
| <i>circMAPK4</i> | miR-3616-3p               | 1 |
| <i>circMAPK4</i> | miR-3618                  | 1 |
| <i>circMAPK4</i> | miR-362-5p/500b-5p        | 2 |
| <i>circMAPK4</i> | miR-3622b-5p              | 2 |
| <i>circMAPK4</i> | miR-3649                  | 1 |
| <i>circMAPK4</i> | miR-3653-5p               | 2 |

|                  |                     |   |
|------------------|---------------------|---|
| <i>circMAPK4</i> | miR-3658            | 1 |
| <i>circMAPK4</i> | miR-3663-3p         | 3 |
| <i>circMAPK4</i> | miR-3664-3p         | 1 |
| <i>circMAPK4</i> | miR-3665            | 1 |
| <i>circMAPK4</i> | miR-3667-3p         | 2 |
| <i>circMAPK4</i> | miR-3670            | 3 |
| <i>circMAPK4</i> | miR-3675-3p         | 1 |
| <i>circMAPK4</i> | miR-3677-3p         | 1 |
| <i>circMAPK4</i> | miR-3678-3p         | 1 |
| <i>circMAPK4</i> | miR-3681-5p         | 3 |
| <i>circMAPK4</i> | miR-3688-3p         | 1 |
| <i>circMAPK4</i> | miR-3688-5p         | 2 |
| <i>circMAPK4</i> | miR-3690            | 1 |
| <i>circMAPK4</i> | miR-3691-3p         | 3 |
| <i>circMAPK4</i> | miR-3691-5p         | 2 |
| <i>circMAPK4</i> | miR-3692-3p         | 2 |
| <i>circMAPK4</i> | miR-370-3p          | 2 |
| <i>circMAPK4</i> | miR-371a-3p         | 1 |
| <i>circMAPK4</i> | miR-371b-3p         | 1 |
| <i>circMAPK4</i> | miR-375             | 1 |
| <i>circMAPK4</i> | miR-376a-2-5p       | 1 |
| <i>circMAPK4</i> | miR-376a-5p         | 1 |
| <i>circMAPK4</i> | miR-377-5p/6086     | 1 |
| <i>circMAPK4</i> | miR-378-3p          | 1 |
| <i>circMAPK4</i> | miR-378a-5p         | 1 |
| <i>circMAPK4</i> | miR-382-3p          | 1 |
| <i>circMAPK4</i> | miR-383-3p          | 3 |
| <i>circMAPK4</i> | miR-3909            | 2 |
| <i>circMAPK4</i> | miR-3912-5p         | 1 |
| <i>circMAPK4</i> | miR-3917            | 1 |
| <i>circMAPK4</i> | miR-3918            | 1 |
| <i>circMAPK4</i> | miR-3925-3p         | 2 |
| <i>circMAPK4</i> | miR-3926            | 1 |
| <i>circMAPK4</i> | miR-3929/4419b/4478 | 3 |
| <i>circMAPK4</i> | miR-3934-3p         | 4 |
| <i>circMAPK4</i> | miR-3937            | 3 |
| <i>circMAPK4</i> | miR-3940-3p         | 2 |
| <i>circMAPK4</i> | miR-3942-3p         | 2 |

|                  |                                    |   |
|------------------|------------------------------------|---|
| <i>circMAPK4</i> | miR-3944-5p                        | 2 |
| <i>circMAPK4</i> | miR-3945                           | 1 |
| <i>circMAPK4</i> | miR-3973                           | 1 |
| <i>circMAPK4</i> | miR-3975                           | 3 |
| <i>circMAPK4</i> | miR-3977                           | 1 |
| <i>circMAPK4</i> | miR-3978                           | 1 |
| <i>circMAPK4</i> | miR-409-3p                         | 3 |
| <i>circMAPK4</i> | miR-412-3p/6754-3p                 | 1 |
| <i>circMAPK4</i> | miR-421                            | 1 |
| <i>circMAPK4</i> | miR-425-5p                         | 1 |
| <i>circMAPK4</i> | miR-4253/6862-5p                   | 1 |
| <i>circMAPK4</i> | miR-4254                           | 1 |
| <i>circMAPK4</i> | miR-4259                           | 1 |
| <i>circMAPK4</i> | miR-4260                           | 1 |
| <i>circMAPK4</i> | miR-4264                           | 1 |
| <i>circMAPK4</i> | miR-4265/4296/4322                 | 4 |
| <i>circMAPK4</i> | miR-4267                           | 4 |
| <i>circMAPK4</i> | miR-4268                           | 1 |
| <i>circMAPK4</i> | miR-4270/4441/6754-5p              | 1 |
| <i>circMAPK4</i> | miR-4274                           | 1 |
| <i>circMAPK4</i> | miR-4276                           | 2 |
| <i>circMAPK4</i> | miR-4279                           | 3 |
| <i>circMAPK4</i> | miR-4281                           | 2 |
| <i>circMAPK4</i> | miR-4283                           | 1 |
| <i>circMAPK4</i> | miR-4284                           | 2 |
| <i>circMAPK4</i> | miR-4287/4685-3p                   | 1 |
| <i>circMAPK4</i> | miR-4289                           | 1 |
| <i>circMAPK4</i> | miR-4299                           | 1 |
| <i>circMAPK4</i> | miR-431-3p                         | 1 |
| <i>circMAPK4</i> | miR-4310/7157-5p                   | 2 |
| <i>circMAPK4</i> | miR-4316                           | 1 |
| <i>circMAPK4</i> | miR-432-3p                         | 3 |
| <i>circMAPK4</i> | miR-432-5p                         | 1 |
| <i>circMAPK4</i> | miR-4321                           | 1 |
| <i>circMAPK4</i> | miR-4324                           | 2 |
| <i>circMAPK4</i> | miR-433-3p                         | 1 |
| <i>circMAPK4</i> | miR-4417                           | 2 |
| <i>circMAPK4</i> | miR-4419a/4510/6127/6129/6130/6133 | 1 |

|                  |                                              |   |
|------------------|----------------------------------------------|---|
| <i>circMAPK4</i> | miR-4425                                     | 1 |
| <i>circMAPK4</i> | miR-4426/4647/4662b                          | 4 |
| <i>circMAPK4</i> | miR-4432                                     | 2 |
| <i>circMAPK4</i> | miR-4433a-5p                                 | 1 |
| <i>circMAPK4</i> | miR-4434/4516/5703                           | 1 |
| <i>circMAPK4</i> | miR-4436b-3p/4632-5p/6735-5p/6879-5p/7843-5p | 1 |
| <i>circMAPK4</i> | miR-4436b-5p                                 | 2 |
| <i>circMAPK4</i> | miR-4437                                     | 1 |
| <i>circMAPK4</i> | miR-4440                                     | 1 |
| <i>circMAPK4</i> | miR-4443                                     | 1 |
| <i>circMAPK4</i> | miR-4446-3p                                  | 1 |
| <i>circMAPK4</i> | miR-4448                                     | 1 |
| <i>circMAPK4</i> | miR-4452                                     | 1 |
| <i>circMAPK4</i> | miR-4453/4538                                | 2 |
| <i>circMAPK4</i> | miR-4456                                     | 1 |
| <i>circMAPK4</i> | miR-4457                                     | 1 |
| <i>circMAPK4</i> | miR-4460                                     | 1 |
| <i>circMAPK4</i> | miR-4463                                     | 2 |
| <i>circMAPK4</i> | miR-4468                                     | 2 |
| <i>circMAPK4</i> | miR-4469                                     | 1 |
| <i>circMAPK4</i> | miR-4474-3p                                  | 2 |
| <i>circMAPK4</i> | miR-4480                                     | 1 |
| <i>circMAPK4</i> | miR-4481/4745-5p                             | 2 |
| <i>circMAPK4</i> | miR-4484                                     | 1 |
| <i>circMAPK4</i> | miR-4487                                     | 3 |
| <i>circMAPK4</i> | miR-4489                                     | 1 |
| <i>circMAPK4</i> | miR-4490                                     | 3 |
| <i>circMAPK4</i> | miR-4491/4657                                | 3 |
| <i>circMAPK4</i> | miR-4496                                     | 1 |
| <i>circMAPK4</i> | miR-4499                                     | 2 |
| <i>circMAPK4</i> | miR-449c-3p                                  | 1 |
| <i>circMAPK4</i> | miR-4502                                     | 2 |
| <i>circMAPK4</i> | miR-450a-1-3p                                | 2 |
| <i>circMAPK4</i> | miR-450a-2-3p                                | 1 |
| <i>circMAPK4</i> | miR-4515                                     | 1 |
| <i>circMAPK4</i> | miR-4519                                     | 1 |
| <i>circMAPK4</i> | miR-451b                                     | 1 |
| <i>circMAPK4</i> | miR-4523                                     | 2 |

|                  |                       |   |
|------------------|-----------------------|---|
| <i>circMAPK4</i> | miR-4528              | 1 |
| <i>circMAPK4</i> | miR-4530              | 2 |
| <i>circMAPK4</i> | miR-4531              | 2 |
| <i>circMAPK4</i> | miR-4539              | 2 |
| <i>circMAPK4</i> | miR-455-3p.2          | 1 |
| <i>circMAPK4</i> | miR-4633-3p/6500-5p   | 2 |
| <i>circMAPK4</i> | miR-4635              | 1 |
| <i>circMAPK4</i> | miR-4638-3p           | 1 |
| <i>circMAPK4</i> | miR-4638-5p           | 1 |
| <i>circMAPK4</i> | miR-4642              | 6 |
| <i>circMAPK4</i> | miR-4645-5p/4673      | 2 |
| <i>circMAPK4</i> | miR-4648              | 2 |
| <i>circMAPK4</i> | miR-4649-3p           | 2 |
| <i>circMAPK4</i> | miR-4650-5p           | 2 |
| <i>circMAPK4</i> | miR-4652-3p           | 2 |
| <i>circMAPK4</i> | miR-4654/4769-5p      | 2 |
| <i>circMAPK4</i> | miR-4655-3p           | 1 |
| <i>circMAPK4</i> | miR-4656              | 1 |
| <i>circMAPK4</i> | miR-4659a-3p/4659b-3p | 1 |
| <i>circMAPK4</i> | miR-4660              | 2 |
| <i>circMAPK4</i> | miR-4661-3p           | 1 |
| <i>circMAPK4</i> | miR-4663              | 4 |
| <i>circMAPK4</i> | miR-4664-3p           | 1 |
| <i>circMAPK4</i> | miR-4666a-5p          | 2 |
| <i>circMAPK4</i> | miR-4670-5p           | 1 |
| <i>circMAPK4</i> | miR-4671-5p           | 1 |
| <i>circMAPK4</i> | miR-4674              | 1 |
| <i>circMAPK4</i> | miR-4675/4741         | 1 |
| <i>circMAPK4</i> | miR-4685-5p/6837-5p   | 2 |
| <i>circMAPK4</i> | miR-4687-3p           | 3 |
| <i>circMAPK4</i> | miR-4688/6743-5p      | 2 |
| <i>circMAPK4</i> | miR-4690-5p           | 2 |
| <i>circMAPK4</i> | miR-4691-3p           | 1 |
| <i>circMAPK4</i> | miR-4695-3p           | 1 |
| <i>circMAPK4</i> | miR-4696              | 1 |
| <i>circMAPK4</i> | miR-4697-3p           | 1 |
| <i>circMAPK4</i> | miR-4699-5p           | 2 |
| <i>circMAPK4</i> | miR-4703-3p           | 1 |



|                  |                             |   |
|------------------|-----------------------------|---|
| <i>circMAPK4</i> | miR-4704-3p                 | 2 |
| <i>circMAPK4</i> | miR-4707-3p                 | 2 |
| <i>circMAPK4</i> | miR-4709-3p                 | 2 |
| <i>circMAPK4</i> | miR-4713-3p                 | 1 |
| <i>circMAPK4</i> | miR-4713-5p                 | 1 |
| <i>circMAPK4</i> | miR-4715-3p                 | 1 |
| <i>circMAPK4</i> | miR-4715-5p                 | 1 |
| <i>circMAPK4</i> | miR-4716-5p                 | 1 |
| <i>circMAPK4</i> | miR-4717-5p                 | 2 |
| <i>circMAPK4</i> | miR-4720-5p/4799-3p/5588-5p | 1 |
| <i>circMAPK4</i> | miR-4721                    | 1 |
| <i>circMAPK4</i> | miR-4722-5p                 | 2 |
| <i>circMAPK4</i> | miR-4726-3p                 | 2 |
| <i>circMAPK4</i> | miR-4727-3p                 | 1 |
| <i>circMAPK4</i> | miR-4727-5p                 | 2 |
| <i>circMAPK4</i> | miR-4728-3p                 | 3 |
| <i>circMAPK4</i> | miR-4730                    | 4 |
| <i>circMAPK4</i> | miR-4731-3p/4801            | 1 |
| <i>circMAPK4</i> | miR-4733-3p                 | 3 |
| <i>circMAPK4</i> | miR-4733-5p                 | 1 |
| <i>circMAPK4</i> | miR-4734                    | 1 |
| <i>circMAPK4</i> | miR-4735-5p                 | 1 |
| <i>circMAPK4</i> | miR-4736                    | 1 |
| <i>circMAPK4</i> | miR-4738-3p                 | 1 |
| <i>circMAPK4</i> | miR-4738-5p                 | 2 |
| <i>circMAPK4</i> | miR-4740-5p                 | 1 |
| <i>circMAPK4</i> | miR-4742-3p                 | 2 |
| <i>circMAPK4</i> | miR-4743-3p                 | 2 |
| <i>circMAPK4</i> | miR-4747-3p                 | 1 |
| <i>circMAPK4</i> | miR-4753-5p                 | 1 |
| <i>circMAPK4</i> | miR-4755-3p                 | 3 |
| <i>circMAPK4</i> | miR-4755-5p/5006-3p         | 1 |
| <i>circMAPK4</i> | miR-4757-5p/6744-3p         | 1 |
| <i>circMAPK4</i> | miR-4760-5p/8061            | 1 |
| <i>circMAPK4</i> | miR-4761-3p                 | 1 |
| <i>circMAPK4</i> | miR-4764-5p                 | 4 |
| <i>circMAPK4</i> | miR-4766-5p                 | 1 |
| <i>circMAPK4</i> | miR-4767                    | 4 |

|                  |                             |   |
|------------------|-----------------------------|---|
| <i>circMAPK4</i> | miR-4769-3p/6817-5p         | 4 |
| <i>circMAPK4</i> | miR-4772-3p                 | 1 |
| <i>circMAPK4</i> | miR-4774-5p                 | 3 |
| <i>circMAPK4</i> | miR-4776-3p                 | 2 |
| <i>circMAPK4</i> | miR-4777-3p                 | 1 |
| <i>circMAPK4</i> | miR-4778-3p                 | 3 |
| <i>circMAPK4</i> | miR-4778-5p                 | 2 |
| <i>circMAPK4</i> | miR-4780                    | 2 |
| <i>circMAPK4</i> | miR-4781-3p                 | 3 |
| <i>circMAPK4</i> | miR-4782-5p/5706            | 4 |
| <i>circMAPK4</i> | miR-4786-3p                 | 1 |
| <i>circMAPK4</i> | miR-4790-3p                 | 2 |
| <i>circMAPK4</i> | miR-4793-3p                 | 2 |
| <i>circMAPK4</i> | miR-4793-5p                 | 2 |
| <i>circMAPK4</i> | miR-4797-3p                 | 1 |
| <i>circMAPK4</i> | miR-4800-5p                 | 1 |
| <i>circMAPK4</i> | miR-4804-5p                 | 1 |
| <i>circMAPK4</i> | miR-483-3p.1                | 1 |
| <i>circMAPK4</i> | miR-484/3155                | 1 |
| <i>circMAPK4</i> | miR-485-5p                  | 3 |
| <i>circMAPK4</i> | miR-486-3p                  | 1 |
| <i>circMAPK4</i> | miR-490-3p                  | 2 |
| <i>circMAPK4</i> | miR-494-3p                  | 1 |
| <i>circMAPK4</i> | miR-495-3p                  | 1 |
| <i>circMAPK4</i> | miR-497-3p                  | 1 |
| <i>circMAPK4</i> | miR-5001-3p                 | 2 |
| <i>circMAPK4</i> | miR-5002-3p                 | 1 |
| <i>circMAPK4</i> | miR-5004-3p                 | 1 |
| <i>circMAPK4</i> | miR-5006-5p                 | 4 |
| <i>circMAPK4</i> | miR-5007-3p                 | 1 |
| <i>circMAPK4</i> | miR-5008-3p/6737-3p/7157-3p | 5 |
| <i>circMAPK4</i> | miR-5009-5p/8058            | 1 |
| <i>circMAPK4</i> | miR-500a-3p                 | 2 |
| <i>circMAPK4</i> | miR-501-5p                  | 2 |
| <i>circMAPK4</i> | miR-502-5p                  | 3 |
| <i>circMAPK4</i> | miR-503-5p                  | 2 |
| <i>circMAPK4</i> | miR-504-5p.1                | 1 |
| <i>circMAPK4</i> | miR-505-3p.1                | 1 |

|                  |                                                                  |   |
|------------------|------------------------------------------------------------------|---|
| <i>circMAPK4</i> | miR-505-3p.2                                                     | 1 |
| <i>circMAPK4</i> | miR-5088-3p                                                      | 2 |
| <i>circMAPK4</i> | miR-5088-5p                                                      | 1 |
| <i>circMAPK4</i> | miR-509-3-5p/509-5p/4418                                         | 3 |
| <i>circMAPK4</i> | miR-5092                                                         | 2 |
| <i>circMAPK4</i> | miR-5096                                                         | 2 |
| <i>circMAPK4</i> | miR-511-3p                                                       | 1 |
| <i>circMAPK4</i> | miR-513a-5p                                                      | 2 |
| <i>circMAPK4</i> | miR-513b-3p                                                      | 1 |
| <i>circMAPK4</i> | miR-514a-3p                                                      | 1 |
| <i>circMAPK4</i> | miR-515-5p/519e-5p                                               | 1 |
| <i>circMAPK4</i> | miR-516b-5p                                                      | 4 |
| <i>circMAPK4</i> | miR-518-3p                                                       | 1 |
| <i>circMAPK4</i> | miR-5187-5p                                                      | 1 |
| <i>circMAPK4</i> | miR-5189-3p                                                      | 2 |
| <i>circMAPK4</i> | miR-518a-5p/527                                                  | 1 |
| <i>circMAPK4</i> | miR-518c-5p                                                      | 2 |
| <i>circMAPK4</i> | miR-518e-3p                                                      | 1 |
| <i>circMAPK4</i> | miR-5190                                                         | 1 |
| <i>circMAPK4</i> | miR-5196-3p                                                      | 2 |
| <i>circMAPK4</i> | miR-5197-5p                                                      | 2 |
| <i>circMAPK4</i> | miR-519d-5p                                                      | 1 |
| <i>circMAPK4</i> | miR-520g-3p                                                      | 1 |
| <i>circMAPK4</i> | miR-526b-5p                                                      | 3 |
| <i>circMAPK4</i> | miR-539-3p                                                       | 1 |
| <i>circMAPK4</i> | miR-539-5p                                                       | 1 |
| <i>circMAPK4</i> | miR-541-5p                                                       | 2 |
| <i>circMAPK4</i> | miR-544a                                                         | 2 |
| <i>circMAPK4</i> | miR-544b                                                         | 2 |
| <i>circMAPK4</i> | miR-545-3p                                                       | 1 |
| <i>circMAPK4</i> | miR-548an                                                        | 1 |
| <i>circMAPK4</i> | miR-548ap-3p/548aa/548t-3p                                       | 2 |
| <i>circMAPK4</i> | miR-548as-3p                                                     | 2 |
| <i>circMAPK4</i> | miR-548au-3p                                                     | 1 |
| <i>circMAPK4</i> | miR-548av-5p/548k/8054                                           | 1 |
| <i>circMAPK4</i> | miR-548aw                                                        | 1 |
| <i>circMAPK4</i> | miR-548ay-3p/548at-3p                                            | 2 |
| <i>circMAPK4</i> | miR-548ay-5p/548au-5p/548as-5p/548ar-5p/548aq-5p/548ap-5p/548am- |   |

|                  |                  |   |
|------------------|------------------|---|
| <i>circMAPK4</i> | miR-548e-5p      | 1 |
| <i>circMAPK4</i> | miR-548l         | 1 |
| <i>circMAPK4</i> | miR-548q         | 1 |
| <i>circMAPK4</i> | miR-551-3p       | 1 |
| <i>circMAPK4</i> | miR-556-5p       | 1 |
| <i>circMAPK4</i> | miR-5571-3p      | 1 |
| <i>circMAPK4</i> | miR-5571-5p      | 1 |
| <i>circMAPK4</i> | miR-5572         | 1 |
| <i>circMAPK4</i> | miR-558          | 3 |
| <i>circMAPK4</i> | miR-5580-5p      | 1 |
| <i>circMAPK4</i> | miR-5581-3p      | 1 |
| <i>circMAPK4</i> | miR-5585-3p      | 1 |
| <i>circMAPK4</i> | miR-5586-5p      | 1 |
| <i>circMAPK4</i> | miR-5587-5p      | 1 |
| <i>circMAPK4</i> | miR-5588-3p      | 1 |
| <i>circMAPK4</i> | miR-5591-3p      | 1 |
| <i>circMAPK4</i> | miR-566          | 1 |
| <i>circMAPK4</i> | miR-5681a        | 1 |
| <i>circMAPK4</i> | miR-5691         | 2 |
| <i>circMAPK4</i> | miR-5695         | 1 |
| <i>circMAPK4</i> | miR-570-3p       | 1 |
| <i>circMAPK4</i> | miR-5700         | 2 |
| <i>circMAPK4</i> | miR-571          | 1 |
| <i>circMAPK4</i> | miR-575/4676-5p  | 1 |
| <i>circMAPK4</i> | miR-576-3p       | 2 |
| <i>circMAPK4</i> | miR-580-5p       | 1 |
| <i>circMAPK4</i> | miR-581          | 2 |
| <i>circMAPK4</i> | miR-584-3p       | 2 |
| <i>circMAPK4</i> | miR-584-5p       | 1 |
| <i>circMAPK4</i> | miR-597-5p       | 1 |
| <i>circMAPK4</i> | miR-600          | 1 |
| <i>circMAPK4</i> | miR-604          | 2 |
| <i>circMAPK4</i> | miR-605-5p       | 2 |
| <i>circMAPK4</i> | miR-6069         | 1 |
| <i>circMAPK4</i> | miR-6072/6891-3p | 1 |
| <i>circMAPK4</i> | miR-6078         | 1 |
| <i>circMAPK4</i> | miR-6079         | 1 |
| <i>circMAPK4</i> | miR-6080         | 1 |

|                  |                  |   |
|------------------|------------------|---|
| <i>circMAPK4</i> | miR-6081         | 2 |
| <i>circMAPK4</i> | miR-6085/6813-5p | 2 |
| <i>circMAPK4</i> | miR-6090         | 1 |
| <i>circMAPK4</i> | miR-6131         | 2 |
| <i>circMAPK4</i> | miR-6132/6836-5p | 2 |
| <i>circMAPK4</i> | miR-615-3p       | 1 |
| <i>circMAPK4</i> | miR-6165         | 2 |
| <i>circMAPK4</i> | miR-618          | 1 |
| <i>circMAPK4</i> | miR-621          | 1 |
| <i>circMAPK4</i> | miR-622          | 1 |
| <i>circMAPK4</i> | miR-623          | 1 |
| <i>circMAPK4</i> | miR-626/6876-3p  | 3 |
| <i>circMAPK4</i> | miR-628-5p       | 5 |
| <i>circMAPK4</i> | miR-629-3p       | 1 |
| <i>circMAPK4</i> | miR-630          | 2 |
| <i>circMAPK4</i> | miR-634          | 4 |
| <i>circMAPK4</i> | miR-635/6774-5p  | 1 |
| <i>circMAPK4</i> | miR-636          | 1 |
| <i>circMAPK4</i> | miR-638          | 1 |
| <i>circMAPK4</i> | miR-639          | 1 |
| <i>circMAPK4</i> | miR-642a-5p      | 1 |
| <i>circMAPK4</i> | miR-646          | 2 |
| <i>circMAPK4</i> | miR-647          | 1 |
| <i>circMAPK4</i> | miR-649          | 2 |
| <i>circMAPK4</i> | miR-6502-3p      | 1 |
| <i>circMAPK4</i> | miR-6505-5p      | 1 |
| <i>circMAPK4</i> | miR-6509-3p      | 2 |
| <i>circMAPK4</i> | miR-6510-5p      | 2 |
| <i>circMAPK4</i> | miR-6511-3p      | 2 |
| <i>circMAPK4</i> | miR-6511-5p      | 5 |
| <i>circMAPK4</i> | miR-6512-5p      | 1 |
| <i>circMAPK4</i> | miR-6513-5p      | 2 |
| <i>circMAPK4</i> | miR-6515-3p      | 2 |
| <i>circMAPK4</i> | miR-6515-5p      | 1 |
| <i>circMAPK4</i> | miR-652-5p       | 2 |
| <i>circMAPK4</i> | miR-653-3p       | 1 |
| <i>circMAPK4</i> | miR-655-5p       | 1 |
| <i>circMAPK4</i> | miR-657          | 1 |

|                  |                     |   |
|------------------|---------------------|---|
| <i>circMAPK4</i> | miR-658             | 4 |
| <i>circMAPK4</i> | miR-660-5p          | 1 |
| <i>circMAPK4</i> | miR-662             | 1 |
| <i>circMAPK4</i> | miR-664a-5p/4794    | 1 |
| <i>circMAPK4</i> | miR-665             | 1 |
| <i>circMAPK4</i> | miR-668-3p          | 1 |
| <i>circMAPK4</i> | miR-670-5p          | 2 |
| <i>circMAPK4</i> | miR-6715a-3p        | 1 |
| <i>circMAPK4</i> | miR-6717-5p         | 1 |
| <i>circMAPK4</i> | miR-6720-5p         | 2 |
| <i>circMAPK4</i> | miR-6721-5p         | 3 |
| <i>circMAPK4</i> | miR-6722-5p         | 1 |
| <i>circMAPK4</i> | miR-6726-3p         | 2 |
| <i>circMAPK4</i> | miR-6730-5p         | 1 |
| <i>circMAPK4</i> | miR-6732-3p         | 1 |
| <i>circMAPK4</i> | miR-6734-3p         | 2 |
| <i>circMAPK4</i> | miR-6734-5p         | 1 |
| <i>circMAPK4</i> | miR-6736-3p         | 5 |
| <i>circMAPK4</i> | miR-6738-3p         | 2 |
| <i>circMAPK4</i> | miR-6751-5p/6803-5p | 1 |
| <i>circMAPK4</i> | miR-6752-3p         | 3 |
| <i>circMAPK4</i> | miR-6755-3p         | 1 |
| <i>circMAPK4</i> | miR-6757-3p         | 1 |
| <i>circMAPK4</i> | miR-6757-5p         | 2 |
| <i>circMAPK4</i> | miR-6758-3p         | 1 |
| <i>circMAPK4</i> | miR-6758-5p/6856-5p | 2 |
| <i>circMAPK4</i> | miR-6759-3p         | 1 |
| <i>circMAPK4</i> | miR-6759-5p         | 4 |
| <i>circMAPK4</i> | miR-676-5p          | 1 |
| <i>circMAPK4</i> | miR-6762-3p         | 2 |
| <i>circMAPK4</i> | miR-6764-3p/6824-3p | 2 |
| <i>circMAPK4</i> | miR-6768-3p         | 1 |
| <i>circMAPK4</i> | miR-6768-5p         | 1 |
| <i>circMAPK4</i> | miR-6770-3p         | 4 |
| <i>circMAPK4</i> | miR-6771-3p         | 1 |
| <i>circMAPK4</i> | miR-6772-3p         | 3 |
| <i>circMAPK4</i> | miR-6773-3p         | 1 |
| <i>circMAPK4</i> | miR-6778-3p         | 1 |

|                  |                     |   |
|------------------|---------------------|---|
| <i>circMAPK4</i> | miR-6780a-3p        | 5 |
| <i>circMAPK4</i> | miR-6780b-3p        | 2 |
| <i>circMAPK4</i> | miR-6782-3p         | 1 |
| <i>circMAPK4</i> | miR-6782-5p         | 1 |
| <i>circMAPK4</i> | miR-6783-5p         | 1 |
| <i>circMAPK4</i> | miR-6784-3p/6862-3p | 2 |
| <i>circMAPK4</i> | miR-6785-3p         | 1 |
| <i>circMAPK4</i> | miR-6787-3p         | 3 |
| <i>circMAPK4</i> | miR-6789-3p         | 1 |
| <i>circMAPK4</i> | miR-6791-3p/6829-3p | 1 |
| <i>circMAPK4</i> | miR-6792-5p         | 1 |
| <i>circMAPK4</i> | miR-6793-3p         | 2 |
| <i>circMAPK4</i> | miR-6796-3p         | 1 |
| <i>circMAPK4</i> | miR-6796-5p         | 4 |
| <i>circMAPK4</i> | miR-6798-5p         | 4 |
| <i>circMAPK4</i> | miR-6799-5p         | 1 |
| <i>circMAPK4</i> | miR-6800-3p         | 1 |
| <i>circMAPK4</i> | miR-6801-5p         | 1 |
| <i>circMAPK4</i> | miR-6802-3p         | 2 |
| <i>circMAPK4</i> | miR-6803-3p         | 1 |
| <i>circMAPK4</i> | miR-6804-3p         | 3 |
| <i>circMAPK4</i> | miR-6807-5p         | 3 |
| <i>circMAPK4</i> | miR-6814-5p         | 2 |
| <i>circMAPK4</i> | miR-6815-3p         | 3 |
| <i>circMAPK4</i> | miR-6817-3p         | 1 |
| <i>circMAPK4</i> | miR-6819-3p/6877-3p | 1 |
| <i>circMAPK4</i> | miR-6822-3p         | 1 |
| <i>circMAPK4</i> | miR-6825-3p         | 2 |
| <i>circMAPK4</i> | miR-6825-5p         | 1 |
| <i>circMAPK4</i> | miR-6826-3p         | 1 |
| <i>circMAPK4</i> | miR-6829-5p         | 1 |
| <i>circMAPK4</i> | miR-6832-3p         | 1 |
| <i>circMAPK4</i> | miR-6834-5p         | 1 |
| <i>circMAPK4</i> | miR-6837-3p         | 1 |
| <i>circMAPK4</i> | miR-6840-3p         | 2 |
| <i>circMAPK4</i> | miR-6841-3p         | 2 |
| <i>circMAPK4</i> | miR-6842-3p         | 1 |
| <i>circMAPK4</i> | miR-6845-3p         | 2 |

|                  |                     |   |
|------------------|---------------------|---|
| <i>circMAPK4</i> | miR-6846-5p/6848-5p | 1 |
| <i>circMAPK4</i> | miR-6847-3p         | 3 |
| <i>circMAPK4</i> | miR-6854-5p         | 6 |
| <i>circMAPK4</i> | miR-6856-3p         | 1 |
| <i>circMAPK4</i> | miR-6858-3p         | 1 |
| <i>circMAPK4</i> | miR-6865-3p         | 2 |
| <i>circMAPK4</i> | miR-6867-3p         | 1 |
| <i>circMAPK4</i> | miR-6868-3p         | 1 |
| <i>circMAPK4</i> | miR-6868-5p         | 1 |
| <i>circMAPK4</i> | miR-6870-3p         | 2 |
| <i>circMAPK4</i> | miR-6871-3p         | 3 |
| <i>circMAPK4</i> | miR-6873-3p         | 1 |
| <i>circMAPK4</i> | miR-6874-5p         | 2 |
| <i>circMAPK4</i> | miR-6875-3p         | 1 |
| <i>circMAPK4</i> | miR-6879-3p         | 1 |
| <i>circMAPK4</i> | miR-6881-3p         | 5 |
| <i>circMAPK4</i> | miR-6882-3p         | 2 |
| <i>circMAPK4</i> | miR-6884-3p         | 1 |
| <i>circMAPK4</i> | miR-6885-3p         | 1 |
| <i>circMAPK4</i> | miR-6886-3p         | 1 |
| <i>circMAPK4</i> | miR-6888-3p         | 1 |
| <i>circMAPK4</i> | miR-6889-3p         | 5 |
| <i>circMAPK4</i> | miR-6890-3p         | 3 |
| <i>circMAPK4</i> | miR-7106-5p         | 1 |
| <i>circMAPK4</i> | miR-7108-5p         | 2 |
| <i>circMAPK4</i> | miR-7109-5p         | 1 |
| <i>circMAPK4</i> | miR-7110-3p         | 1 |
| <i>circMAPK4</i> | miR-7111-3p         | 5 |
| <i>circMAPK4</i> | miR-7112-5p         | 2 |
| <i>circMAPK4</i> | miR-7113-3p         | 1 |
| <i>circMAPK4</i> | miR-7113-5p         | 2 |
| <i>circMAPK4</i> | miR-7152-5p         | 2 |
| <i>circMAPK4</i> | miR-7154-5p         | 1 |
| <i>circMAPK4</i> | miR-7156-3p         | 2 |
| <i>circMAPK4</i> | miR-7158-3p         | 1 |
| <i>circMAPK4</i> | miR-7159-5p         | 1 |
| <i>circMAPK4</i> | miR-7160-5p         | 4 |
| <i>circMAPK4</i> | miR-7162-3p         | 2 |



|                  |                              |   |
|------------------|------------------------------|---|
| <i>circMAPK4</i> | miR-760                      | 1 |
| <i>circMAPK4</i> | miR-762/4492/4498/5001-5p    | 1 |
| <i>circMAPK4</i> | miR-7641                     | 3 |
| <i>circMAPK4</i> | miR-766-3p                   | 2 |
| <i>circMAPK4</i> | miR-767-3p                   | 2 |
| <i>circMAPK4</i> | miR-767-5p                   | 3 |
| <i>circMAPK4</i> | miR-770-5p                   | 3 |
| <i>circMAPK4</i> | miR-7850-5p                  | 1 |
| <i>circMAPK4</i> | miR-7855-5p                  | 1 |
| <i>circMAPK4</i> | miR-7974                     | 3 |
| <i>circMAPK4</i> | miR-7975                     | 1 |
| <i>circMAPK4</i> | miR-7976                     | 2 |
| <i>circMAPK4</i> | miR-7978                     | 1 |
| <i>circMAPK4</i> | miR-8053                     | 1 |
| <i>circMAPK4</i> | miR-8056                     | 2 |
| <i>circMAPK4</i> | miR-8057                     | 1 |
| <i>circMAPK4</i> | miR-8060                     | 2 |
| <i>circMAPK4</i> | miR-8062                     | 1 |
| <i>circMAPK4</i> | miR-8066                     | 2 |
| <i>circMAPK4</i> | miR-8075                     | 4 |
| <i>circMAPK4</i> | miR-8076                     | 1 |
| <i>circMAPK4</i> | miR-8077                     | 4 |
| <i>circMAPK4</i> | miR-8084                     | 1 |
| <i>circMAPK4</i> | miR-8086                     | 1 |
| <i>circMAPK4</i> | miR-8087                     | 2 |
| <i>circMAPK4</i> | miR-873-5p.1                 | 3 |
| <i>circMAPK4</i> | miR-873-5p.2                 | 2 |
| <i>circMAPK4</i> | miR-874-3p                   | 3 |
| <i>circMAPK4</i> | miR-875-5p                   | 1 |
| <i>circMAPK4</i> | miR-877-3p                   | 2 |
| <i>circMAPK4</i> | miR-885-3p                   | 2 |
| <i>circMAPK4</i> | miR-887-5p                   | 2 |
| <i>circMAPK4</i> | miR-889-5p                   | 1 |
| <i>circMAPK4</i> | miR-891a-3p                  | 2 |
| <i>circMAPK4</i> | miR-9-3p                     | 2 |
| <i>circMAPK4</i> | miR-9-5p                     | 1 |
| <i>circMAPK4</i> | miR-920/4300/5591-5p/6726-5p | 1 |
| <i>circMAPK4</i> | miR-921                      | 1 |

|                   |                                      |   |
|-------------------|--------------------------------------|---|
| <i>circMAPK4</i>  | miR-922                              | 2 |
| <i>circMAPK4</i>  | miR-92a-1-5p                         | 1 |
| <i>circMAPK4</i>  | miR-934                              | 1 |
| <i>circMAPK4</i>  | miR-938                              | 1 |
| <i>circMAPK4</i>  | miR-939-5p/1343-5p                   | 1 |
| <i>circMAPK4</i>  | miR-95-3p                            | 2 |
| <i>circMAPK4</i>  | miR-96-5p/1271-5p                    | 2 |
| <i>circMAPK4</i>  | miR-99-3p                            | 1 |
| <i>circMBOAT2</i> | let-7a-2-3p/let-7g-3p                | 1 |
| <i>circMBOAT2</i> | let-7c-3p                            | 1 |
| <i>circMBOAT2</i> | miR-1183                             | 1 |
| <i>circMBOAT2</i> | miR-122-5p                           | 1 |
| <i>circMBOAT2</i> | miR-1227-3p                          | 2 |
| <i>circMBOAT2</i> | miR-1251-3p                          | 2 |
| <i>circMBOAT2</i> | miR-1270                             | 1 |
| <i>circMBOAT2</i> | miR-128-3p                           | 1 |
| <i>circMBOAT2</i> | miR-129-5p                           | 1 |
| <i>circMBOAT2</i> | miR-130b-5p                          | 3 |
| <i>circMBOAT2</i> | miR-1323                             | 2 |
| <i>circMBOAT2</i> | miR-142-3p.1                         | 1 |
| <i>circMBOAT2</i> | miR-142-3p.2                         | 1 |
| <i>circMBOAT2</i> | miR-146-5p                           | 1 |
| <i>circMBOAT2</i> | miR-1468-3p                          | 2 |
| <i>circMBOAT2</i> | miR-15-5p/16-5p/195-5p/424-5p/497-5p | 1 |
| <i>circMBOAT2</i> | miR-154-3p/487-3p                    | 1 |
| <i>circMBOAT2</i> | miR-155-3p                           | 1 |
| <i>circMBOAT2</i> | miR-16-2-3p/195-3p                   | 1 |
| <i>circMBOAT2</i> | miR-17-5p/20-5p/93-5p/106-5p/519-3p  | 1 |
| <i>circMBOAT2</i> | miR-181-5p                           | 2 |
| <i>circMBOAT2</i> | miR-1915-5p                          | 1 |
| <i>circMBOAT2</i> | miR-192-3p                           | 2 |
| <i>circMBOAT2</i> | miR-202-5p                           | 1 |
| <i>circMBOAT2</i> | miR-204-3p/4646-5p                   | 1 |
| <i>circMBOAT2</i> | miR-208-3p                           | 2 |
| <i>circMBOAT2</i> | miR-2113                             | 1 |
| <i>circMBOAT2</i> | miR-224-5p                           | 1 |
| <i>circMBOAT2</i> | miR-2392                             | 1 |
| <i>circMBOAT2</i> | miR-2681-3p                          | 1 |

|                   |                    |   |
|-------------------|--------------------|---|
| <i>circMBOAT2</i> | miR-27-3p          | 1 |
| <i>circMBOAT2</i> | miR-2861           | 2 |
| <i>circMBOAT2</i> | miR-29a-5p         | 1 |
| <i>circMBOAT2</i> | miR-29b-2-5p       | 1 |
| <i>circMBOAT2</i> | miR-30-3p          | 1 |
| <i>circMBOAT2</i> | miR-3152-5p        | 1 |
| <i>circMBOAT2</i> | miR-3190-3p        | 1 |
| <i>circMBOAT2</i> | miR-3192-5p        | 1 |
| <i>circMBOAT2</i> | miR-3194-3p        | 1 |
| <i>circMBOAT2</i> | miR-326            | 1 |
| <i>circMBOAT2</i> | miR-335-3p         | 1 |
| <i>circMBOAT2</i> | miR-338-5p         | 1 |
| <i>circMBOAT2</i> | miR-342-3p         | 1 |
| <i>circMBOAT2</i> | miR-3668           | 2 |
| <i>circMBOAT2</i> | miR-3674           | 1 |
| <i>circMBOAT2</i> | miR-3681-5p        | 2 |
| <i>circMBOAT2</i> | miR-3685           | 1 |
| <i>circMBOAT2</i> | miR-3691-3p        | 1 |
| <i>circMBOAT2</i> | miR-3692-5p        | 1 |
| <i>circMBOAT2</i> | miR-376-3p         | 1 |
| <i>circMBOAT2</i> | miR-380-3p         | 2 |
| <i>circMBOAT2</i> | miR-384            | 1 |
| <i>circMBOAT2</i> | miR-3920           | 1 |
| <i>circMBOAT2</i> | miR-3973           | 1 |
| <i>circMBOAT2</i> | miR-4266           | 1 |
| <i>circMBOAT2</i> | miR-4272           | 2 |
| <i>circMBOAT2</i> | miR-4302           | 1 |
| <i>circMBOAT2</i> | miR-4312           | 1 |
| <i>circMBOAT2</i> | miR-4314           | 1 |
| <i>circMBOAT2</i> | miR-432-3p         | 1 |
| <i>circMBOAT2</i> | miR-4325           | 2 |
| <i>circMBOAT2</i> | miR-433-3p         | 1 |
| <i>circMBOAT2</i> | miR-4433b-3p       | 1 |
| <i>circMBOAT2</i> | miR-4434/4516/5703 | 1 |
| <i>circMBOAT2</i> | miR-4444           | 1 |
| <i>circMBOAT2</i> | miR-4457           | 1 |
| <i>circMBOAT2</i> | miR-4480           | 1 |
| <i>circMBOAT2</i> | miR-4481/4745-5p   | 1 |

|                   |                    |   |
|-------------------|--------------------|---|
| <i>circMBOAT2</i> | miR-449c-3p        | 1 |
| <i>circMBOAT2</i> | miR-450b-3p/769-3p | 1 |
| <i>circMBOAT2</i> | miR-4520-3p        | 1 |
| <i>circMBOAT2</i> | miR-4524-5p        | 1 |
| <i>circMBOAT2</i> | miR-4531           | 1 |
| <i>circMBOAT2</i> | miR-4633-5p        | 1 |
| <i>circMBOAT2</i> | miR-4661-5p        | 2 |
| <i>circMBOAT2</i> | miR-4678           | 1 |
| <i>circMBOAT2</i> | miR-4691-3p        | 1 |
| <i>circMBOAT2</i> | miR-4693-5p        | 1 |
| <i>circMBOAT2</i> | miR-4703-3p        | 2 |
| <i>circMBOAT2</i> | miR-4742-3p        | 1 |
| <i>circMBOAT2</i> | miR-4764-5p        | 1 |
| <i>circMBOAT2</i> | miR-4773           | 1 |
| <i>circMBOAT2</i> | miR-4774-3p        | 1 |
| <i>circMBOAT2</i> | miR-4777-3p        | 1 |
| <i>circMBOAT2</i> | miR-4778-5p        | 1 |
| <i>circMBOAT2</i> | miR-4796-5p        | 1 |
| <i>circMBOAT2</i> | miR-493-5p         | 1 |
| <i>circMBOAT2</i> | miR-498            | 2 |
| <i>circMBOAT2</i> | miR-499a-5p        | 2 |
| <i>circMBOAT2</i> | miR-5002-5p        | 1 |
| <i>circMBOAT2</i> | miR-5003-3p        | 1 |
| <i>circMBOAT2</i> | miR-5004-3p        | 1 |
| <i>circMBOAT2</i> | miR-501-3p/502-3p  | 1 |
| <i>circMBOAT2</i> | miR-5010-3p        | 1 |
| <i>circMBOAT2</i> | miR-503-5p         | 1 |
| <i>circMBOAT2</i> | miR-505-3p.1       | 1 |
| <i>circMBOAT2</i> | miR-5089-3p        | 2 |
| <i>circMBOAT2</i> | miR-5089-5p        | 1 |
| <i>circMBOAT2</i> | miR-513a-5p        | 1 |
| <i>circMBOAT2</i> | miR-5189-3p        | 1 |
| <i>circMBOAT2</i> | miR-518c-5p        | 1 |
| <i>circMBOAT2</i> | miR-520g-3p        | 1 |
| <i>circMBOAT2</i> | miR-524-5p         | 1 |
| <i>circMBOAT2</i> | miR-532-5p         | 1 |
| <i>circMBOAT2</i> | miR-544a           | 1 |
| <i>circMBOAT2</i> | miR-548ah-5p/3609  | 1 |

|                   |                                               |   |
|-------------------|-----------------------------------------------|---|
| <i>circMBOAT2</i> | miR-548aj-5p/548f-5p/548g-5p/548x-5p          | 2 |
| <i>circMBOAT2</i> | miR-548az-3p/548ar-3p/548a-3p/548e-3p/548f-3p | 2 |
| <i>circMBOAT2</i> | miR-548p                                      | 2 |
| <i>circMBOAT2</i> | miR-550b-2-5p                                 | 2 |
| <i>circMBOAT2</i> | miR-5582-3p                                   | 2 |
| <i>circMBOAT2</i> | miR-5691                                      | 1 |
| <i>circMBOAT2</i> | miR-5705                                      | 1 |
| <i>circMBOAT2</i> | miR-578                                       | 1 |
| <i>circMBOAT2</i> | miR-589-5p                                    | 1 |
| <i>circMBOAT2</i> | miR-592                                       | 1 |
| <i>circMBOAT2</i> | miR-599                                       | 1 |
| <i>circMBOAT2</i> | miR-6071                                      | 1 |
| <i>circMBOAT2</i> | miR-6073                                      | 1 |
| <i>circMBOAT2</i> | miR-6074                                      | 1 |
| <i>circMBOAT2</i> | miR-618                                       | 1 |
| <i>circMBOAT2</i> | miR-619-5p/6506-5p                            | 1 |
| <i>circMBOAT2</i> | miR-621                                       | 1 |
| <i>circMBOAT2</i> | miR-628-5p                                    | 1 |
| <i>circMBOAT2</i> | miR-641/3617-5p                               | 2 |
| <i>circMBOAT2</i> | miR-643                                       | 1 |
| <i>circMBOAT2</i> | miR-646                                       | 1 |
| <i>circMBOAT2</i> | miR-648                                       | 2 |
| <i>circMBOAT2</i> | miR-6505-5p                                   | 1 |
| <i>circMBOAT2</i> | miR-659-3p                                    | 1 |
| <i>circMBOAT2</i> | miR-6724-5p/6773-5p                           | 2 |
| <i>circMBOAT2</i> | miR-6728-5p                                   | 1 |
| <i>circMBOAT2</i> | miR-6733-3p                                   | 1 |
| <i>circMBOAT2</i> | miR-6738-3p                                   | 1 |
| <i>circMBOAT2</i> | miR-6764-3p/6824-3p                           | 1 |
| <i>circMBOAT2</i> | miR-6828-3p                                   | 1 |
| <i>circMBOAT2</i> | miR-6832-3p                                   | 2 |
| <i>circMBOAT2</i> | miR-6841-3p                                   | 1 |
| <i>circMBOAT2</i> | miR-6844                                      | 2 |
| <i>circMBOAT2</i> | miR-6882-5p                                   | 1 |
| <i>circMBOAT2</i> | miR-6885-3p                                   | 2 |
| <i>circMBOAT2</i> | miR-708-3p                                    | 2 |
| <i>circMBOAT2</i> | miR-7154-5p                                   | 1 |
| <i>circMBOAT2</i> | miR-7703                                      | 2 |

|                   |                     |   |
|-------------------|---------------------|---|
| <i>circMBOAT2</i> | miR-7844-5p         | 2 |
| <i>circMBOAT2</i> | miR-7847-3p         | 1 |
| <i>circMBOAT2</i> | miR-7848-3p         | 2 |
| <i>circMBOAT2</i> | miR-7850-5p         | 1 |
| <i>circMBOAT2</i> | miR-7852-3p         | 2 |
| <i>circMBOAT2</i> | miR-8075            | 1 |
| <i>circMBOAT2</i> | miR-875-5p          | 1 |
| <i>circMBOAT2</i> | miR-9-5p            | 1 |
| <i>circMBOAT2</i> | miR-924             | 1 |
| <i>circMBOAT2</i> | miR-93-3p           | 1 |
| <i>circMBOAT2</i> | miR-96-3p           | 1 |
| <i>circMBOAT2</i> | miR-5579-5p         | 1 |
| <i>circMBOAT2</i> | miR-8069            | 1 |
| <i>circMBOAT2</i> | miR-4704-3p         | 1 |
| <i>circMBOAT2</i> | miR-1229-3p         | 1 |
| <i>circMBOAT2</i> | miR-126-3p.1        | 1 |
| <i>circMBOAT2</i> | miR-140-3p.1        | 1 |
| <i>circMBOAT2</i> | miR-186-5p          | 1 |
| <i>circMBOAT2</i> | miR-18a-3p          | 1 |
| <i>circMBOAT2</i> | miR-221-5p/8073     | 1 |
| <i>circMBOAT2</i> | miR-2467-3p         | 1 |
| <i>circMBOAT2</i> | miR-3124-3p         | 1 |
| <i>circMBOAT2</i> | miR-3127-3p/6756-3p | 1 |
| <i>circMBOAT2</i> | miR-3128            | 1 |
| <i>circMBOAT2</i> | miR-3133            | 1 |
| <i>circMBOAT2</i> | miR-324-3p/1913     | 1 |
| <i>circMBOAT2</i> | miR-3667-3p         | 1 |
| <i>circMBOAT2</i> | miR-3679-3p         | 1 |
| <i>circMBOAT2</i> | miR-3937            | 1 |
| <i>circMBOAT2</i> | miR-3938            | 1 |
| <i>circMBOAT2</i> | miR-4258            | 1 |
| <i>circMBOAT2</i> | miR-4438            | 1 |
| <i>circMBOAT2</i> | miR-4446-5p         | 1 |
| <i>circMBOAT2</i> | miR-4455            | 1 |
| <i>circMBOAT2</i> | miR-4511            | 1 |
| <i>circMBOAT2</i> | miR-4532            | 1 |
| <i>circMBOAT2</i> | miR-4707-3p         | 1 |
| <i>circMBOAT2</i> | miR-4711-3p         | 2 |

|                   |                                       |   |
|-------------------|---------------------------------------|---|
| <i>circMBOAT2</i> | miR-4717-3p                           | 1 |
| <i>circMBOAT2</i> | miR-4720-5p/4799-3p/5588-5p           | 1 |
| <i>circMBOAT2</i> | miR-5007-5p                           | 1 |
| <i>circMBOAT2</i> | miR-5088-3p                           | 1 |
| <i>circMBOAT2</i> | miR-511-5p                            | 1 |
| <i>circMBOAT2</i> | miR-548b-3p                           | 1 |
| <i>circMBOAT2</i> | miR-609                               | 1 |
| <i>circMBOAT2</i> | miR-619-3p                            | 1 |
| <i>circMBOAT2</i> | miR-6734-3p                           | 1 |
| <i>circMBOAT2</i> | miR-6772-5p                           | 1 |
| <i>circMBOAT2</i> | miR-6818-3p                           | 1 |
| <i>circMBOAT2</i> | miR-6826-3p                           | 1 |
| <i>circMBOAT2</i> | miR-6830-3p                           | 1 |
| <i>circMBOAT2</i> | miR-6867-5p                           | 1 |
| <i>circMBOAT2</i> | miR-6868-5p                           | 1 |
| <i>circMBOAT2</i> | miR-6882-3p                           | 1 |
| <i>circMBOAT2</i> | miR-7108-3p                           | 1 |
| <i>circMBOAT2</i> | miR-7150                              | 1 |
| <i>circMBOAT2</i> | miR-759                               | 1 |
| <i>circMBOAT2</i> | miR-7851-3p                           | 1 |
| <i>circMBTD1</i>  | let-7a-3p/let-7b-3p/let-7f-1-3p/98-3p | 1 |
| <i>circMBTD1</i>  | let-7f-2-3p/1185-3p                   | 1 |
| <i>circMBTD1</i>  | miR-1-3p/206                          | 2 |
| <i>circMBTD1</i>  | miR-1180-5p                           | 1 |
| <i>circMBTD1</i>  | miR-1193                              | 1 |
| <i>circMBTD1</i>  | miR-1227-3p                           | 2 |
| <i>circMBTD1</i>  | miR-1243                              | 1 |
| <i>circMBTD1</i>  | miR-1245b-3p                          | 1 |
| <i>circMBTD1</i>  | miR-1250-3p                           | 1 |
| <i>circMBTD1</i>  | miR-1252-5p                           | 1 |
| <i>circMBTD1</i>  | miR-1256                              | 1 |
| <i>circMBTD1</i>  | miR-1265                              | 1 |
| <i>circMBTD1</i>  | miR-1273g-5p                          | 1 |
| <i>circMBTD1</i>  | miR-1277-5p                           | 1 |
| <i>circMBTD1</i>  | miR-1279                              | 1 |
| <i>circMBTD1</i>  | miR-1283                              | 1 |
| <i>circMBTD1</i>  | miR-1296-3p                           | 1 |
| <i>circMBTD1</i>  | miR-1305                              | 1 |

|                  |                                     |   |
|------------------|-------------------------------------|---|
| <i>circMBTD1</i> | miR-1323                            | 1 |
| <i>circMBTD1</i> | miR-133a-3p.2/133b                  | 1 |
| <i>circMBTD1</i> | miR-136-3p                          | 1 |
| <i>circMBTD1</i> | miR-140-3p.2                        | 1 |
| <i>circMBTD1</i> | miR-140-5p                          | 1 |
| <i>circMBTD1</i> | miR-141-3p/200-3p                   | 1 |
| <i>circMBTD1</i> | miR-142-3p.2                        | 1 |
| <i>circMBTD1</i> | miR-143-5p                          | 1 |
| <i>circMBTD1</i> | miR-154-3p/487-3p                   | 1 |
| <i>circMBTD1</i> | miR-16-1-3p                         | 1 |
| <i>circMBTD1</i> | miR-16-2-3p/195-3p                  | 1 |
| <i>circMBTD1</i> | miR-17-5p/20-5p/93-5p/106-5p/519-3p | 1 |
| <i>circMBTD1</i> | miR-181c-3p                         | 1 |
| <i>circMBTD1</i> | miR-182-3p                          | 1 |
| <i>circMBTD1</i> | miR-1827                            | 1 |
| <i>circMBTD1</i> | miR-186-5p                          | 2 |
| <i>circMBTD1</i> | miR-1915-5p                         | 1 |
| <i>circMBTD1</i> | miR-192-3p                          | 1 |
| <i>circMBTD1</i> | miR-194-3p                          | 1 |
| <i>circMBTD1</i> | miR-1976                            | 1 |
| <i>circMBTD1</i> | miR-203a-5p                         | 1 |
| <i>circMBTD1</i> | miR-203b-5p/6718-5p                 | 2 |
| <i>circMBTD1</i> | miR-2054                            | 1 |
| <i>circMBTD1</i> | miR-208-3p                          | 1 |
| <i>circMBTD1</i> | miR-208-5p                          | 1 |
| <i>circMBTD1</i> | miR-2110                            | 1 |
| <i>circMBTD1</i> | miR-2113                            | 1 |
| <i>circMBTD1</i> | miR-218-1-3p                        | 1 |
| <i>circMBTD1</i> | miR-218-2-3p                        | 1 |
| <i>circMBTD1</i> | miR-26-3p                           | 1 |
| <i>circMBTD1</i> | miR-297                             | 1 |
| <i>circMBTD1</i> | miR-30-3p                           | 1 |
| <i>circMBTD1</i> | miR-3133                            | 2 |
| <i>circMBTD1</i> | miR-3134                            | 1 |
| <i>circMBTD1</i> | miR-3140-3p                         | 1 |
| <i>circMBTD1</i> | miR-3150a-3p                        | 1 |
| <i>circMBTD1</i> | miR-3151-5p                         | 1 |
| <i>circMBTD1</i> | miR-3156-5p                         | 1 |



|                  |                           |   |
|------------------|---------------------------|---|
| <i>circMBTD1</i> | miR-3165                  | 1 |
| <i>circMBTD1</i> | miR-3182                  | 1 |
| <i>circMBTD1</i> | miR-3185                  | 1 |
| <i>circMBTD1</i> | miR-3190-3p               | 1 |
| <i>circMBTD1</i> | miR-320                   | 1 |
| <i>circMBTD1</i> | miR-3200-3p               | 1 |
| <i>circMBTD1</i> | miR-3202                  | 1 |
| <i>circMBTD1</i> | miR-335-5p                | 1 |
| <i>circMBTD1</i> | miR-338-5p                | 1 |
| <i>circMBTD1</i> | miR-3606-5p               | 1 |
| <i>circMBTD1</i> | miR-362-5p/500b-5p        | 1 |
| <i>circMBTD1</i> | miR-3653-5p               | 1 |
| <i>circMBTD1</i> | miR-3654                  | 1 |
| <i>circMBTD1</i> | miR-3658                  | 1 |
| <i>circMBTD1</i> | miR-3684                  | 2 |
| <i>circMBTD1</i> | miR-3713                  | 1 |
| <i>circMBTD1</i> | miR-374-5p/655-3p         | 1 |
| <i>circMBTD1</i> | miR-380-5p/563            | 1 |
| <i>circMBTD1</i> | miR-381-3p                | 1 |
| <i>circMBTD1</i> | miR-3919                  | 1 |
| <i>circMBTD1</i> | miR-3923                  | 1 |
| <i>circMBTD1</i> | miR-3928-3p               | 1 |
| <i>circMBTD1</i> | miR-3928-5p/6806-3p       | 1 |
| <i>circMBTD1</i> | miR-3942-3p               | 2 |
| <i>circMBTD1</i> | miR-3978                  | 2 |
| <i>circMBTD1</i> | miR-411-5p.1              | 2 |
| <i>circMBTD1</i> | miR-4271/4725-3p/6780b-5p | 1 |
| <i>circMBTD1</i> | miR-4272                  | 1 |
| <i>circMBTD1</i> | miR-4274                  | 1 |
| <i>circMBTD1</i> | miR-4280                  | 2 |
| <i>circMBTD1</i> | miR-4291                  | 1 |
| <i>circMBTD1</i> | miR-4299                  | 2 |
| <i>circMBTD1</i> | miR-4310/7157-5p          | 1 |
| <i>circMBTD1</i> | miR-4432                  | 1 |
| <i>circMBTD1</i> | miR-4443                  | 1 |
| <i>circMBTD1</i> | miR-4447/4472             | 1 |
| <i>circMBTD1</i> | miR-4456                  | 2 |
| <i>circMBTD1</i> | miR-4464/4748             | 1 |

|                  |                       |   |
|------------------|-----------------------|---|
| <i>circMBTD1</i> | miR-4476/6876-5p      | 2 |
| <i>circMBTD1</i> | miR-4481/4745-5p      | 1 |
| <i>circMBTD1</i> | miR-4517              | 1 |
| <i>circMBTD1</i> | miR-4519              | 1 |
| <i>circMBTD1</i> | miR-4520-3p           | 1 |
| <i>circMBTD1</i> | miR-4521              | 1 |
| <i>circMBTD1</i> | miR-4524-5p           | 1 |
| <i>circMBTD1</i> | miR-4533              | 1 |
| <i>circMBTD1</i> | miR-4534/8082         | 1 |
| <i>circMBTD1</i> | miR-455-3p.2          | 1 |
| <i>circMBTD1</i> | miR-4639-5p           | 1 |
| <i>circMBTD1</i> | miR-4641              | 1 |
| <i>circMBTD1</i> | miR-4659a-5p/4659b-5p | 1 |
| <i>circMBTD1</i> | miR-4662a-3p          | 1 |
| <i>circMBTD1</i> | miR-4666a-3p          | 1 |
| <i>circMBTD1</i> | miR-4666b             | 1 |
| <i>circMBTD1</i> | miR-4686              | 1 |
| <i>circMBTD1</i> | miR-4690-3p/5685      | 1 |
| <i>circMBTD1</i> | miR-4693-3p           | 2 |
| <i>circMBTD1</i> | miR-4699-5p           | 2 |
| <i>circMBTD1</i> | miR-4700-3p           | 1 |
| <i>circMBTD1</i> | miR-4709-3p           | 1 |
| <i>circMBTD1</i> | miR-4712-3p           | 1 |
| <i>circMBTD1</i> | miR-4729              | 1 |
| <i>circMBTD1</i> | miR-4756-3p           | 1 |
| <i>circMBTD1</i> | miR-4773              | 1 |
| <i>circMBTD1</i> | miR-4789-5p           | 1 |
| <i>circMBTD1</i> | miR-4790-3p           | 1 |
| <i>circMBTD1</i> | miR-4795-5p           | 1 |
| <i>circMBTD1</i> | miR-491-5p            | 1 |
| <i>circMBTD1</i> | miR-494-3p            | 1 |
| <i>circMBTD1</i> | miR-496.1             | 1 |
| <i>circMBTD1</i> | miR-497-3p            | 1 |
| <i>circMBTD1</i> | miR-498               | 1 |
| <i>circMBTD1</i> | miR-499a-3p/499b-3p   | 1 |
| <i>circMBTD1</i> | miR-499a-5p           | 1 |
| <i>circMBTD1</i> | miR-5007-3p           | 1 |
| <i>circMBTD1</i> | miR-501-3p/502-3p     | 1 |

|                  |                    |   |
|------------------|--------------------|---|
| <i>circMBTD1</i> | miR-501-5p         | 1 |
| <i>circMBTD1</i> | miR-5010-3p        | 1 |
| <i>circMBTD1</i> | miR-5011-3p        | 1 |
| <i>circMBTD1</i> | miR-505-5p         | 1 |
| <i>circMBTD1</i> | miR-506-5p         | 1 |
| <i>circMBTD1</i> | miR-511-3p         | 1 |
| <i>circMBTD1</i> | miR-514a-3p        | 1 |
| <i>circMBTD1</i> | miR-516a-5p        | 1 |
| <i>circMBTD1</i> | miR-518-3p         | 1 |
| <i>circMBTD1</i> | miR-5193           | 1 |
| <i>circMBTD1</i> | miR-524-5p         | 2 |
| <i>circMBTD1</i> | miR-548ah-5p/3609  | 1 |
| <i>circMBTD1</i> | miR-548ao-5p/548ax | 1 |
| <i>circMBTD1</i> | miR-548av-3p       | 1 |
| <i>circMBTD1</i> | miR-548q           | 2 |
| <i>circMBTD1</i> | miR-550b-3p        | 1 |
| <i>circMBTD1</i> | miR-556-3p         | 1 |
| <i>circMBTD1</i> | miR-5583-3p        | 1 |
| <i>circMBTD1</i> | miR-5585-5p        | 1 |
| <i>circMBTD1</i> | miR-5586-3p        | 1 |
| <i>circMBTD1</i> | miR-5590-5p        | 1 |
| <i>circMBTD1</i> | miR-561-5p         | 1 |
| <i>circMBTD1</i> | miR-562            | 1 |
| <i>circMBTD1</i> | miR-5683           | 1 |
| <i>circMBTD1</i> | miR-5687           | 1 |
| <i>circMBTD1</i> | miR-5693           | 1 |
| <i>circMBTD1</i> | miR-592            | 1 |
| <i>circMBTD1</i> | miR-595            | 1 |
| <i>circMBTD1</i> | miR-599            | 1 |
| <i>circMBTD1</i> | miR-607            | 2 |
| <i>circMBTD1</i> | miR-6071           | 1 |
| <i>circMBTD1</i> | miR-6076/6797-3p   | 1 |
| <i>circMBTD1</i> | miR-6077           | 1 |
| <i>circMBTD1</i> | miR-6079           | 1 |
| <i>circMBTD1</i> | miR-6080           | 2 |
| <i>circMBTD1</i> | miR-6128           | 1 |
| <i>circMBTD1</i> | miR-617            | 1 |
| <i>circMBTD1</i> | miR-627-3p         | 1 |

|                  |                     |   |
|------------------|---------------------|---|
| <i>circMBTD1</i> | miR-6499-3p         | 1 |
| <i>circMBTD1</i> | miR-6502-3p         | 1 |
| <i>circMBTD1</i> | miR-6504-3p         | 1 |
| <i>circMBTD1</i> | miR-6505-3p         | 1 |
| <i>circMBTD1</i> | miR-651-3p          | 2 |
| <i>circMBTD1</i> | miR-6512-5p         | 1 |
| <i>circMBTD1</i> | miR-6515-5p         | 1 |
| <i>circMBTD1</i> | miR-653-5p          | 1 |
| <i>circMBTD1</i> | miR-656-3p          | 1 |
| <i>circMBTD1</i> | miR-659-3p          | 1 |
| <i>circMBTD1</i> | miR-660-3p          | 1 |
| <i>circMBTD1</i> | miR-660-5p          | 1 |
| <i>circMBTD1</i> | miR-671-5p          | 1 |
| <i>circMBTD1</i> | miR-6715a-3p        | 1 |
| <i>circMBTD1</i> | miR-6715b-3p        | 1 |
| <i>circMBTD1</i> | miR-6716-5p         | 1 |
| <i>circMBTD1</i> | miR-6731-3p         | 1 |
| <i>circMBTD1</i> | miR-6742-5p         | 1 |
| <i>circMBTD1</i> | miR-675-3p          | 1 |
| <i>circMBTD1</i> | miR-6757-3p         | 1 |
| <i>circMBTD1</i> | miR-6758-5p/6856-5p | 1 |
| <i>circMBTD1</i> | miR-6778-3p         | 1 |
| <i>circMBTD1</i> | miR-6791-3p/6829-3p | 1 |
| <i>circMBTD1</i> | miR-6810-5p         | 1 |
| <i>circMBTD1</i> | miR-6813-3p         | 1 |
| <i>circMBTD1</i> | miR-6828-3p         | 1 |
| <i>circMBTD1</i> | miR-6828-5p         | 1 |
| <i>circMBTD1</i> | miR-6830-5p         | 1 |
| <i>circMBTD1</i> | miR-6836-3p         | 1 |
| <i>circMBTD1</i> | miR-6841-3p         | 1 |
| <i>circMBTD1</i> | miR-6843-3p/6848-3p | 1 |
| <i>circMBTD1</i> | miR-6856-3p         | 1 |
| <i>circMBTD1</i> | miR-6857-5p         | 1 |
| <i>circMBTD1</i> | miR-6880-5p         | 1 |
| <i>circMBTD1</i> | miR-6885-3p         | 1 |
| <i>circMBTD1</i> | miR-6890-3p         | 1 |
| <i>circMBTD1</i> | miR-6894-5p         | 1 |
| <i>circMBTD1</i> | miR-7-5p            | 1 |

|                  |                     |   |
|------------------|---------------------|---|
| <i>circMBTD1</i> | miR-7154-3p         | 1 |
| <i>circMBTD1</i> | miR-7161-3p         | 1 |
| <i>circMBTD1</i> | miR-758-5p          | 1 |
| <i>circMBTD1</i> | miR-759             | 1 |
| <i>circMBTD1</i> | miR-765             | 1 |
| <i>circMBTD1</i> | miR-766-5p          | 1 |
| <i>circMBTD1</i> | miR-7978            | 2 |
| <i>circMBTD1</i> | miR-8071            | 1 |
| <i>circMBTD1</i> | miR-8087            | 1 |
| <i>circMBTD1</i> | miR-885-5p          | 3 |
| <i>circMBTD1</i> | miR-892-5p          | 1 |
| <i>circMBTD1</i> | miR-892b            | 1 |
| <i>circMBTD1</i> | miR-921             | 1 |
| <i>circMBTD1</i> | miR-92a-1-5p        | 1 |
| <i>circMBTD1</i> | miR-100-3p          | 1 |
| <i>circMBTD1</i> | miR-103-3p/107      | 1 |
| <i>circMBTD1</i> | miR-1178-3p         | 1 |
| <i>circMBTD1</i> | miR-1179            | 1 |
| <i>circMBTD1</i> | miR-1184            | 1 |
| <i>circMBTD1</i> | miR-1197            | 1 |
| <i>circMBTD1</i> | miR-1205            | 1 |
| <i>circMBTD1</i> | miR-1207-3p         | 1 |
| <i>circMBTD1</i> | miR-1224-5p         | 2 |
| <i>circMBTD1</i> | miR-1233-5p/6778-5p | 1 |
| <i>circMBTD1</i> | miR-1236-5p         | 1 |
| <i>circMBTD1</i> | miR-1237-3p         | 1 |
| <i>circMBTD1</i> | miR-124-3p.1        | 2 |
| <i>circMBTD1</i> | miR-1248            | 1 |
| <i>circMBTD1</i> | miR-1264            | 1 |
| <i>circMBTD1</i> | miR-1266-3p         | 1 |
| <i>circMBTD1</i> | miR-1273f           | 2 |
| <i>circMBTD1</i> | miR-1294            | 2 |
| <i>circMBTD1</i> | miR-1295b-5p/1912   | 1 |
| <i>circMBTD1</i> | miR-134-3p          | 1 |
| <i>circMBTD1</i> | miR-136-5p          | 1 |
| <i>circMBTD1</i> | miR-143-3p          | 2 |
| <i>circMBTD1</i> | miR-1468-3p         | 2 |
| <i>circMBTD1</i> | miR-146a-3p         | 1 |

|                  |                                      |   |
|------------------|--------------------------------------|---|
| <i>circMBTD1</i> | miR-147a                             | 1 |
| <i>circMBTD1</i> | miR-148a-5p                          | 1 |
| <i>circMBTD1</i> | miR-148b-5p/6874-3p                  | 1 |
| <i>circMBTD1</i> | miR-15-5p/16-5p/195-5p/424-5p/497-5p | 4 |
| <i>circMBTD1</i> | miR-17-3p                            | 1 |
| <i>circMBTD1</i> | miR-181-5p                           | 2 |
| <i>circMBTD1</i> | miR-1910-3p/6511a-5p                 | 1 |
| <i>circMBTD1</i> | miR-1914-5p                          | 1 |
| <i>circMBTD1</i> | miR-20b-3p                           | 1 |
| <i>circMBTD1</i> | miR-2116-5p                          | 1 |
| <i>circMBTD1</i> | miR-214-3p/3619-5p                   | 1 |
| <i>circMBTD1</i> | miR-216a-5p                          | 1 |
| <i>circMBTD1</i> | miR-216b-5p                          | 1 |
| <i>circMBTD1</i> | miR-22-3p                            | 1 |
| <i>circMBTD1</i> | miR-22-5p                            | 1 |
| <i>circMBTD1</i> | miR-222-5p                           | 1 |
| <i>circMBTD1</i> | miR-2681-5p                          | 1 |
| <i>circMBTD1</i> | miR-3065-5p                          | 1 |
| <i>circMBTD1</i> | miR-31-5p                            | 2 |
| <i>circMBTD1</i> | miR-3130-5p/4482-5p                  | 1 |
| <i>circMBTD1</i> | miR-3137                             | 1 |
| <i>circMBTD1</i> | miR-3145-5p                          | 1 |
| <i>circMBTD1</i> | miR-3148                             | 1 |
| <i>circMBTD1</i> | miR-3154                             | 1 |
| <i>circMBTD1</i> | miR-3158-5p                          | 1 |
| <i>circMBTD1</i> | miR-3168                             | 1 |
| <i>circMBTD1</i> | miR-3170/6855-5p                     | 1 |
| <i>circMBTD1</i> | miR-3174                             | 2 |
| <i>circMBTD1</i> | miR-3184-3p                          | 1 |
| <i>circMBTD1</i> | miR-3187-3p                          | 1 |
| <i>circMBTD1</i> | miR-3200-5p                          | 2 |
| <i>circMBTD1</i> | miR-330-3p                           | 1 |
| <i>circMBTD1</i> | miR-330-3p.2                         | 2 |
| <i>circMBTD1</i> | miR-337-5p                           | 1 |
| <i>circMBTD1</i> | miR-34-5p/449-5p                     | 1 |
| <i>circMBTD1</i> | miR-34b-5p/449c-5p                   | 1 |
| <i>circMBTD1</i> | miR-3613-3p                          | 1 |
| <i>circMBTD1</i> | miR-3618                             | 1 |

|                  |                    |   |
|------------------|--------------------|---|
| <i>circMBTD1</i> | miR-3620-3p        | 1 |
| <i>circMBTD1</i> | miR-3686           | 1 |
| <i>circMBTD1</i> | miR-3688-3p        | 1 |
| <i>circMBTD1</i> | miR-3714           | 2 |
| <i>circMBTD1</i> | miR-374a-3p        | 1 |
| <i>circMBTD1</i> | miR-3908           | 1 |
| <i>circMBTD1</i> | miR-3910           | 2 |
| <i>circMBTD1</i> | miR-3911           | 1 |
| <i>circMBTD1</i> | miR-3915           | 2 |
| <i>circMBTD1</i> | miR-3925-3p        | 1 |
| <i>circMBTD1</i> | miR-3934-3p        | 1 |
| <i>circMBTD1</i> | miR-3941           | 1 |
| <i>circMBTD1</i> | miR-3942-5p        | 1 |
| <i>circMBTD1</i> | miR-409-5p         | 1 |
| <i>circMBTD1</i> | miR-412-3p/6754-3p | 2 |
| <i>circMBTD1</i> | miR-425-3p         | 1 |
| <i>circMBTD1</i> | miR-4263           | 1 |
| <i>circMBTD1</i> | miR-4264           | 1 |
| <i>circMBTD1</i> | miR-4265/4296/4322 | 1 |
| <i>circMBTD1</i> | miR-4267           | 1 |
| <i>circMBTD1</i> | miR-4268           | 1 |
| <i>circMBTD1</i> | miR-4307           | 1 |
| <i>circMBTD1</i> | miR-4316           | 2 |
| <i>circMBTD1</i> | miR-4422           | 2 |
| <i>circMBTD1</i> | miR-4435           | 1 |
| <i>circMBTD1</i> | miR-4448           | 1 |
| <i>circMBTD1</i> | miR-4457           | 1 |
| <i>circMBTD1</i> | miR-4463           | 1 |
| <i>circMBTD1</i> | miR-4484           | 1 |
| <i>circMBTD1</i> | miR-4493           | 1 |
| <i>circMBTD1</i> | miR-4494           | 2 |
| <i>circMBTD1</i> | miR-4496           | 1 |
| <i>circMBTD1</i> | miR-4499           | 1 |
| <i>circMBTD1</i> | miR-449b-3p        | 1 |
| <i>circMBTD1</i> | miR-4506           | 1 |
| <i>circMBTD1</i> | miR-450b-3p/769-3p | 1 |
| <i>circMBTD1</i> | miR-4513/6855-3p   | 1 |
| <i>circMBTD1</i> | miR-4539           | 2 |

|                  |                          |   |
|------------------|--------------------------|---|
| <i>circMBTD1</i> | miR-4636                 | 1 |
| <i>circMBTD1</i> | miR-4643                 | 1 |
| <i>circMBTD1</i> | miR-4648                 | 1 |
| <i>circMBTD1</i> | miR-4652-3p              | 1 |
| <i>circMBTD1</i> | miR-4654/4769-5p         | 1 |
| <i>circMBTD1</i> | miR-4659a-3p/4659b-3p    | 3 |
| <i>circMBTD1</i> | miR-466                  | 1 |
| <i>circMBTD1</i> | miR-4660                 | 3 |
| <i>circMBTD1</i> | miR-4667-5p/4700-5p/8089 | 1 |
| <i>circMBTD1</i> | miR-4668-3p              | 1 |
| <i>circMBTD1</i> | miR-4670-3p              | 1 |
| <i>circMBTD1</i> | miR-4671-5p              | 1 |
| <i>circMBTD1</i> | miR-4672                 | 1 |
| <i>circMBTD1</i> | miR-4677-3p              | 1 |
| <i>circMBTD1</i> | miR-4679                 | 1 |
| <i>circMBTD1</i> | miR-4689/6858-5p         | 2 |
| <i>circMBTD1</i> | miR-4698                 | 1 |
| <i>circMBTD1</i> | miR-4703-3p              | 1 |
| <i>circMBTD1</i> | miR-4708-5p              | 2 |
| <i>circMBTD1</i> | miR-4713-5p              | 1 |
| <i>circMBTD1</i> | miR-4714-3p              | 1 |
| <i>circMBTD1</i> | miR-4724-3p              | 2 |
| <i>circMBTD1</i> | miR-4724-5p              | 2 |
| <i>circMBTD1</i> | miR-4731-3p/4801         | 1 |
| <i>circMBTD1</i> | miR-4731-5p              | 1 |
| <i>circMBTD1</i> | miR-4743-3p              | 1 |
| <i>circMBTD1</i> | miR-4751                 | 1 |
| <i>circMBTD1</i> | miR-4764-5p              | 1 |
| <i>circMBTD1</i> | miR-4765                 | 1 |
| <i>circMBTD1</i> | miR-4766-3p              | 1 |
| <i>circMBTD1</i> | miR-4766-5p              | 2 |
| <i>circMBTD1</i> | miR-4789-3p              | 1 |
| <i>circMBTD1</i> | miR-4797-3p              | 1 |
| <i>circMBTD1</i> | miR-4799-5p              | 1 |
| <i>circMBTD1</i> | miR-488-3p               | 2 |
| <i>circMBTD1</i> | miR-488-5p               | 1 |
| <i>circMBTD1</i> | miR-490-5p               | 1 |
| <i>circMBTD1</i> | miR-493-3p               | 1 |



|                  |                                                                  |   |
|------------------|------------------------------------------------------------------|---|
| <i>circMBTD1</i> | miR-495-3p                                                       | 2 |
| <i>circMBTD1</i> | miR-499b-5p                                                      | 2 |
| <i>circMBTD1</i> | miR-5004-5p                                                      | 1 |
| <i>circMBTD1</i> | miR-503-5p                                                       | 4 |
| <i>circMBTD1</i> | miR-508-5p                                                       | 1 |
| <i>circMBTD1</i> | miR-5089-5p                                                      | 1 |
| <i>circMBTD1</i> | miR-515-5p/519e-5p                                               | 1 |
| <i>circMBTD1</i> | miR-5186                                                         | 1 |
| <i>circMBTD1</i> | miR-5187-5p                                                      | 2 |
| <i>circMBTD1</i> | miR-518a-5p/527                                                  | 1 |
| <i>circMBTD1</i> | miR-5190                                                         | 1 |
| <i>circMBTD1</i> | miR-5197-3p                                                      | 1 |
| <i>circMBTD1</i> | miR-519d-5p                                                      | 2 |
| <i>circMBTD1</i> | miR-520f-5p                                                      | 1 |
| <i>circMBTD1</i> | miR-543                                                          | 2 |
| <i>circMBTD1</i> | miR-548ac/548bb-3p/548d-3p/548h-3p/548z                          |   |
| <i>circMBTD1</i> | miR-548aj-5p/548f-5p/548g-5p/548x-5p                             | 2 |
| <i>circMBTD1</i> | miR-548an                                                        | 1 |
| <i>circMBTD1</i> | miR-548aq-3p/548am-3p/548aj-3p/548ah-3p/548ae-3p/548j-3p/548x-3p |   |
| <i>circMBTD1</i> | miR-548at-5p                                                     | 1 |
| <i>circMBTD1</i> | miR-548au-3p                                                     | 1 |
| <i>circMBTD1</i> | miR-548aw                                                        | 1 |
| <i>circMBTD1</i> | miR-548az-5p/548t-5p                                             | 1 |
| <i>circMBTD1</i> | miR-548e-5p                                                      | 1 |
| <i>circMBTD1</i> | miR-548g-3p                                                      | 1 |
| <i>circMBTD1</i> | miR-548n                                                         | 1 |
| <i>circMBTD1</i> | miR-548p                                                         | 2 |
| <i>circMBTD1</i> | miR-548s                                                         | 1 |
| <i>circMBTD1</i> | miR-548u/7161-5p                                                 | 1 |
| <i>circMBTD1</i> | miR-551b-5p                                                      | 1 |
| <i>circMBTD1</i> | miR-552-3p                                                       | 1 |
| <i>circMBTD1</i> | miR-555                                                          | 1 |
| <i>circMBTD1</i> | miR-5579-3p                                                      | 1 |
| <i>circMBTD1</i> | miR-5581-3p                                                      | 1 |
| <i>circMBTD1</i> | miR-5584-3p                                                      | 1 |
| <i>circMBTD1</i> | miR-5589-5p                                                      | 1 |
| <i>circMBTD1</i> | miR-5591-3p                                                      | 1 |
| <i>circMBTD1</i> | miR-561-3p                                                       | 1 |

|                  |                             |   |
|------------------|-----------------------------|---|
| <i>circMBTD1</i> | miR-5681a                   | 2 |
| <i>circMBTD1</i> | miR-5684                    | 1 |
| <i>circMBTD1</i> | miR-5690                    | 1 |
| <i>circMBTD1</i> | miR-5695                    | 2 |
| <i>circMBTD1</i> | miR-576-3p                  | 1 |
| <i>circMBTD1</i> | miR-576-5p                  | 1 |
| <i>circMBTD1</i> | miR-582-3p                  | 2 |
| <i>circMBTD1</i> | miR-588                     | 1 |
| <i>circMBTD1</i> | miR-605-3p                  | 1 |
| <i>circMBTD1</i> | miR-606                     | 1 |
| <i>circMBTD1</i> | miR-6124                    | 1 |
| <i>circMBTD1</i> | miR-621                     | 1 |
| <i>circMBTD1</i> | miR-622                     | 1 |
| <i>circMBTD1</i> | miR-637                     | 1 |
| <i>circMBTD1</i> | miR-641/3617-5p             | 1 |
| <i>circMBTD1</i> | miR-642-3p                  | 1 |
| <i>circMBTD1</i> | miR-644a                    | 1 |
| <i>circMBTD1</i> | miR-646                     | 4 |
| <i>circMBTD1</i> | miR-6516-3p                 | 1 |
| <i>circMBTD1</i> | miR-671-3p                  | 1 |
| <i>circMBTD1</i> | miR-6720-5p                 | 1 |
| <i>circMBTD1</i> | miR-6728-5p                 | 1 |
| <i>circMBTD1</i> | miR-6730-5p                 | 2 |
| <i>circMBTD1</i> | miR-6736-3p                 | 3 |
| <i>circMBTD1</i> | miR-6737-5p/6812-5p/6819-5p | 1 |
| <i>circMBTD1</i> | miR-6746-3p                 | 1 |
| <i>circMBTD1</i> | miR-6759-5p                 | 1 |
| <i>circMBTD1</i> | miR-676-5p                  | 3 |
| <i>circMBTD1</i> | miR-6768-3p                 | 1 |
| <i>circMBTD1</i> | miR-6771-5p                 | 1 |
| <i>circMBTD1</i> | miR-6782-3p                 | 1 |
| <i>circMBTD1</i> | miR-6796-5p                 | 1 |
| <i>circMBTD1</i> | miR-6809-5p                 | 2 |
| <i>circMBTD1</i> | miR-6818-5p                 | 1 |
| <i>circMBTD1</i> | miR-6819-3p/6877-3p         | 1 |
| <i>circMBTD1</i> | miR-6826-5p                 | 2 |
| <i>circMBTD1</i> | miR-6837-3p                 | 2 |
| <i>circMBTD1</i> | miR-6854-3p                 | 2 |

|                  |                         |   |
|------------------|-------------------------|---|
| <i>circMBTD1</i> | miR-6857-3p             | 1 |
| <i>circMBTD1</i> | miR-6867-3p             | 1 |
| <i>circMBTD1</i> | miR-6875-3p             | 3 |
| <i>circMBTD1</i> | miR-6881-5p             | 1 |
| <i>circMBTD1</i> | miR-7109-3p             | 1 |
| <i>circMBTD1</i> | miR-7155-5p             | 1 |
| <i>circMBTD1</i> | miR-766-3p              | 1 |
| <i>circMBTD1</i> | miR-7705                | 2 |
| <i>circMBTD1</i> | miR-8063                | 1 |
| <i>circMBTD1</i> | miR-8069                | 1 |
| <i>circMBTD1</i> | miR-922                 | 1 |
| <i>circMBTD1</i> | miR-934                 | 1 |
| <i>circMBTD1</i> | miR-940/6808-5p/6893-5p | 1 |
| <i>circMBTD1</i> | miR-3936                | 1 |
| <i>circMBTD1</i> | miR-4999-3p             | 1 |
| <i>circMBTD1</i> | miR-6782-5p             | 1 |
| <i>circMED13</i> | miR-106a-3p             | 1 |
| <i>circMED13</i> | miR-1179                | 1 |
| <i>circMED13</i> | miR-1197                | 1 |
| <i>circMED13</i> | miR-1200                | 1 |
| <i>circMED13</i> | miR-1227-5p             | 1 |
| <i>circMED13</i> | miR-1233-5p/6778-5p     | 2 |
| <i>circMED13</i> | miR-1234-3p/7107-5p     | 1 |
| <i>circMED13</i> | miR-1236-3p             | 2 |
| <i>circMED13</i> | miR-1238-3p             | 1 |
| <i>circMED13</i> | miR-124-5p              | 1 |
| <i>circMED13</i> | miR-1245b-3p            | 1 |
| <i>circMED13</i> | miR-1246                | 2 |
| <i>circMED13</i> | miR-1251-3p             | 1 |
| <i>circMED13</i> | miR-1252-5p             | 1 |
| <i>circMED13</i> | miR-1253                | 1 |
| <i>circMED13</i> | miR-126-5p              | 1 |
| <i>circMED13</i> | miR-1266-3p             | 1 |
| <i>circMED13</i> | miR-1267                | 1 |
| <i>circMED13</i> | miR-127-5p              | 1 |
| <i>circMED13</i> | miR-1270                | 2 |
| <i>circMED13</i> | miR-1277-5p             | 1 |
| <i>circMED13</i> | miR-1287-5p             | 1 |

|                  |                                     |   |
|------------------|-------------------------------------|---|
| <i>circMED13</i> | miR-1288-5p                         | 1 |
| <i>circMED13</i> | miR-129-5p                          | 1 |
| <i>circMED13</i> | miR-1295b-5p/1912                   | 1 |
| <i>circMED13</i> | miR-1296-3p                         | 1 |
| <i>circMED13</i> | miR-1306-5p                         | 1 |
| <i>circMED13</i> | miR-1324                            | 1 |
| <i>circMED13</i> | miR-133a-3p.1                       | 2 |
| <i>circMED13</i> | miR-133a-3p.2/133b                  | 1 |
| <i>circMED13</i> | miR-134-3p                          | 1 |
| <i>circMED13</i> | miR-138-1-3p                        | 1 |
| <i>circMED13</i> | miR-140-3p.1                        | 1 |
| <i>circMED13</i> | miR-141-5p                          | 1 |
| <i>circMED13</i> | miR-142-3p.2                        | 1 |
| <i>circMED13</i> | miR-143-5p                          | 2 |
| <i>circMED13</i> | miR-145-5p                          | 1 |
| <i>circMED13</i> | miR-146-5p                          | 1 |
| <i>circMED13</i> | miR-146a-3p                         | 1 |
| <i>circMED13</i> | miR-147a                            | 1 |
| <i>circMED13</i> | miR-149-5p                          | 3 |
| <i>circMED13</i> | miR-17-5p/20-5p/93-5p/106-5p/519-3p | 1 |
| <i>circMED13</i> | miR-18-5p                           | 1 |
| <i>circMED13</i> | miR-181c-3p                         | 1 |
| <i>circMED13</i> | miR-1825                            | 2 |
| <i>circMED13</i> | miR-185-3p                          | 1 |
| <i>circMED13</i> | miR-187-5p                          | 1 |
| <i>circMED13</i> | miR-188-5p                          | 1 |
| <i>circMED13</i> | miR-18a-3p                          | 1 |
| <i>circMED13</i> | miR-190a-3p                         | 1 |
| <i>circMED13</i> | miR-1914-5p                         | 1 |
| <i>circMED13</i> | miR-193-3p                          | 1 |
| <i>circMED13</i> | miR-198                             | 2 |
| <i>circMED13</i> | miR-199-5p                          | 2 |
| <i>circMED13</i> | miR-203a-3p.1                       | 1 |
| <i>circMED13</i> | miR-2113                            | 1 |
| <i>circMED13</i> | miR-2116-5p                         | 2 |
| <i>circMED13</i> | miR-22-5p                           | 2 |
| <i>circMED13</i> | miR-221-5p/8073                     | 1 |
| <i>circMED13</i> | miR-222-5p                          | 1 |

|                  |                       |   |
|------------------|-----------------------|---|
| <i>circMED13</i> | miR-223-3p            | 1 |
| <i>circMED13</i> | miR-223-5p            | 1 |
| <i>circMED13</i> | miR-2276-3p           | 1 |
| <i>circMED13</i> | miR-2278              | 1 |
| <i>circMED13</i> | miR-23-3p             | 2 |
| <i>circMED13</i> | miR-2355-5p           | 2 |
| <i>circMED13</i> | miR-2681-5p           | 1 |
| <i>circMED13</i> | miR-299-5p            | 1 |
| <i>circMED13</i> | miR-302c-5p           | 1 |
| <i>circMED13</i> | miR-3074-3p           | 1 |
| <i>circMED13</i> | miR-3119              | 2 |
| <i>circMED13</i> | miR-3123              | 1 |
| <i>circMED13</i> | miR-3130-5p/4482-5p   | 1 |
| <i>circMED13</i> | miR-3134              | 1 |
| <i>circMED13</i> | miR-3135b             | 1 |
| <i>circMED13</i> | miR-3136-5p/4439      | 1 |
| <i>circMED13</i> | miR-3138              | 1 |
| <i>circMED13</i> | miR-3140-3p           | 1 |
| <i>circMED13</i> | miR-3143              | 1 |
| <i>circMED13</i> | miR-3149              | 1 |
| <i>circMED13</i> | miR-3151-3p           | 1 |
| <i>circMED13</i> | miR-3157-3p           | 1 |
| <i>circMED13</i> | miR-3160-5p           | 1 |
| <i>circMED13</i> | miR-3165              | 1 |
| <i>circMED13</i> | miR-320e              | 1 |
| <i>circMED13</i> | miR-324-3p/1913       | 1 |
| <i>circMED13</i> | miR-335-5p            | 1 |
| <i>circMED13</i> | miR-338-3p            | 1 |
| <i>circMED13</i> | miR-33a-3p            | 1 |
| <i>circMED13</i> | miR-3611              | 2 |
| <i>circMED13</i> | miR-3612              | 1 |
| <i>circMED13</i> | miR-362-5p/500b-5p    | 1 |
| <i>circMED13</i> | miR-3622a-3p/3622b-3p | 1 |
| <i>circMED13</i> | miR-3655              | 1 |
| <i>circMED13</i> | miR-3659              | 1 |
| <i>circMED13</i> | miR-3663-3p           | 1 |
| <i>circMED13</i> | miR-367-5p            | 1 |
| <i>circMED13</i> | miR-3682-5p           | 1 |

|                  |                     |   |
|------------------|---------------------|---|
| <i>circMED13</i> | miR-3688-3p         | 1 |
| <i>circMED13</i> | miR-3691-5p         | 1 |
| <i>circMED13</i> | miR-3713            | 1 |
| <i>circMED13</i> | miR-374-5p          | 2 |
| <i>circMED13</i> | miR-374a-3p         | 1 |
| <i>circMED13</i> | miR-378-3p          | 1 |
| <i>circMED13</i> | miR-378a-5p         | 1 |
| <i>circMED13</i> | miR-382-3p          | 1 |
| <i>circMED13</i> | miR-3911            | 1 |
| <i>circMED13</i> | miR-3925-3p         | 1 |
| <i>circMED13</i> | miR-3925-5p         | 1 |
| <i>circMED13</i> | miR-3928-5p/6806-3p | 1 |
| <i>circMED13</i> | miR-3976            | 1 |
| <i>circMED13</i> | miR-3978            | 2 |
| <i>circMED13</i> | miR-410-3p          | 2 |
| <i>circMED13</i> | miR-425-3p          | 1 |
| <i>circMED13</i> | miR-4252            | 1 |
| <i>circMED13</i> | miR-4260            | 1 |
| <i>circMED13</i> | miR-4261            | 1 |
| <i>circMED13</i> | miR-4265/4296/4322  | 1 |
| <i>circMED13</i> | miR-4266            | 1 |
| <i>circMED13</i> | miR-4273/7156-5p    | 1 |
| <i>circMED13</i> | miR-4280            | 1 |
| <i>circMED13</i> | miR-4283            | 1 |
| <i>circMED13</i> | miR-4286            | 1 |
| <i>circMED13</i> | miR-4292/6791-5p    | 1 |
| <i>circMED13</i> | miR-4302            | 1 |
| <i>circMED13</i> | miR-4308            | 1 |
| <i>circMED13</i> | miR-4310/7157-5p    | 1 |
| <i>circMED13</i> | miR-4320            | 1 |
| <i>circMED13</i> | miR-4434/4516/5703  | 3 |
| <i>circMED13</i> | miR-4464/4748       | 1 |
| <i>circMED13</i> | miR-4489            | 1 |
| <i>circMED13</i> | miR-4494            | 1 |
| <i>circMED13</i> | miR-4501            | 1 |
| <i>circMED13</i> | miR-450a-2-3p       | 1 |
| <i>circMED13</i> | miR-450b-3p/769-3p  | 2 |
| <i>circMED13</i> | miR-452-5p/892-3p   | 2 |

|                  |                     |   |
|------------------|---------------------|---|
| <i>circMED13</i> | miR-4520-3p         | 2 |
| <i>circMED13</i> | miR-4522            | 1 |
| <i>circMED13</i> | miR-4524b-3p        | 1 |
| <i>circMED13</i> | miR-4530            | 1 |
| <i>circMED13</i> | miR-4531            | 2 |
| <i>circMED13</i> | miR-4534/8082       | 1 |
| <i>circMED13</i> | miR-455-3p.2        | 2 |
| <i>circMED13</i> | miR-4637            | 1 |
| <i>circMED13</i> | miR-4638-3p         | 1 |
| <i>circMED13</i> | miR-4648            | 2 |
| <i>circMED13</i> | miR-4654/4769-5p    | 2 |
| <i>circMED13</i> | miR-466             | 1 |
| <i>circMED13</i> | miR-4662-5p         | 1 |
| <i>circMED13</i> | miR-4662a-3p        | 1 |
| <i>circMED13</i> | miR-4665-3p         | 1 |
| <i>circMED13</i> | miR-4668-3p         | 1 |
| <i>circMED13</i> | miR-4677-3p         | 1 |
| <i>circMED13</i> | miR-4677-5p         | 1 |
| <i>circMED13</i> | miR-4679            | 1 |
| <i>circMED13</i> | miR-4684-3p         | 1 |
| <i>circMED13</i> | miR-4691-5p/6792-3p | 1 |
| <i>circMED13</i> | miR-4693-5p         | 1 |
| <i>circMED13</i> | miR-4694-3p         | 1 |
| <i>circMED13</i> | miR-4697-3p         | 1 |
| <i>circMED13</i> | miR-4699-5p         | 3 |
| <i>circMED13</i> | miR-4704-3p         | 1 |
| <i>circMED13</i> | miR-4709-3p         | 2 |
| <i>circMED13</i> | miR-4714-3p         | 1 |
| <i>circMED13</i> | miR-4717-3p         | 2 |
| <i>circMED13</i> | miR-4717-5p         | 1 |
| <i>circMED13</i> | miR-4729            | 1 |
| <i>circMED13</i> | miR-4738-3p         | 2 |
| <i>circMED13</i> | miR-4752            | 1 |
| <i>circMED13</i> | miR-4764-3p         | 1 |
| <i>circMED13</i> | miR-4772-3p         | 1 |
| <i>circMED13</i> | miR-4777-5p         | 1 |
| <i>circMED13</i> | miR-4778-5p         | 1 |
| <i>circMED13</i> | miR-4797-5p         | 1 |

|                  |                     |   |
|------------------|---------------------|---|
| <i>circMED13</i> | miR-4800-5p         | 1 |
| <i>circMED13</i> | miR-4802-5p         | 1 |
| <i>circMED13</i> | miR-490-3p          | 1 |
| <i>circMED13</i> | miR-490-5p          | 1 |
| <i>circMED13</i> | miR-491-3p          | 1 |
| <i>circMED13</i> | miR-494-3p          | 1 |
| <i>circMED13</i> | miR-499a-3p/499b-3p | 1 |
| <i>circMED13</i> | miR-499b-5p         | 1 |
| <i>circMED13</i> | miR-5002-5p         | 1 |
| <i>circMED13</i> | miR-5003-3p         | 1 |
| <i>circMED13</i> | miR-5007-3p         | 1 |
| <i>circMED13</i> | miR-5008-5p         | 1 |
| <i>circMED13</i> | miR-500a-3p         | 1 |
| <i>circMED13</i> | miR-501-3p/502-3p   | 1 |
| <i>circMED13</i> | miR-501-5p          | 1 |
| <i>circMED13</i> | miR-5010-3p         | 1 |
| <i>circMED13</i> | miR-502-5p          | 1 |
| <i>circMED13</i> | miR-5089-5p         | 2 |
| <i>circMED13</i> | miR-5092            | 1 |
| <i>circMED13</i> | miR-518d-5p/519-5p  | 1 |
| <i>circMED13</i> | miR-5190            | 1 |
| <i>circMED13</i> | miR-5193            | 2 |
| <i>circMED13</i> | miR-522-3p          | 1 |
| <i>circMED13</i> | miR-525-5p          | 1 |
| <i>circMED13</i> | miR-539-5p          | 2 |
| <i>circMED13</i> | miR-543             | 2 |
| <i>circMED13</i> | miR-548ah-5p/3609   | 1 |
| <i>circMED13</i> | miR-548av-3p        | 1 |
| <i>circMED13</i> | miR-548m            | 1 |
| <i>circMED13</i> | miR-5572            | 1 |
| <i>circMED13</i> | miR-5586-3p         | 1 |
| <i>circMED13</i> | miR-5591-3p         | 1 |
| <i>circMED13</i> | miR-5680            | 3 |
| <i>circMED13</i> | miR-5683            | 2 |
| <i>circMED13</i> | miR-5692a           | 1 |
| <i>circMED13</i> | miR-570-3p          | 1 |
| <i>circMED13</i> | miR-574-5p          | 1 |
| <i>circMED13</i> | miR-578             | 3 |



|                  |                  |   |
|------------------|------------------|---|
| <i>circMED13</i> | miR-582-3p       | 2 |
| <i>circMED13</i> | miR-584-3p       | 1 |
| <i>circMED13</i> | miR-589-5p       | 1 |
| <i>circMED13</i> | miR-605-5p       | 1 |
| <i>circMED13</i> | miR-6072/6891-3p | 1 |
| <i>circMED13</i> | miR-6076/6797-3p | 1 |
| <i>circMED13</i> | miR-6080         | 1 |
| <i>circMED13</i> | miR-6083         | 1 |
| <i>circMED13</i> | miR-6089         | 1 |
| <i>circMED13</i> | miR-610          | 1 |
| <i>circMED13</i> | miR-6126         | 1 |
| <i>circMED13</i> | miR-618          | 1 |
| <i>circMED13</i> | miR-624-5p       | 1 |
| <i>circMED13</i> | miR-630          | 1 |
| <i>circMED13</i> | miR-640          | 1 |
| <i>circMED13</i> | miR-643          | 1 |
| <i>circMED13</i> | miR-644a         | 1 |
| <i>circMED13</i> | miR-648          | 1 |
| <i>circMED13</i> | miR-649          | 1 |
| <i>circMED13</i> | miR-6501-3p      | 1 |
| <i>circMED13</i> | miR-6502-3p      | 1 |
| <i>circMED13</i> | miR-6506-3p      | 1 |
| <i>circMED13</i> | miR-6508-5p/8067 | 1 |
| <i>circMED13</i> | miR-6514-5p      | 1 |
| <i>circMED13</i> | miR-6515-3p      | 2 |
| <i>circMED13</i> | miR-660-3p       | 2 |
| <i>circMED13</i> | miR-664a-5p/4794 | 3 |
| <i>circMED13</i> | miR-664b-5p      | 1 |
| <i>circMED13</i> | miR-670-3p       | 1 |
| <i>circMED13</i> | miR-670-5p       | 1 |
| <i>circMED13</i> | miR-6716-5p      | 1 |
| <i>circMED13</i> | miR-6728-5p      | 2 |
| <i>circMED13</i> | miR-6733-3p      | 1 |
| <i>circMED13</i> | miR-6749-3p      | 1 |
| <i>circMED13</i> | miR-6759-5p      | 1 |
| <i>circMED13</i> | miR-6765-3p      | 1 |
| <i>circMED13</i> | miR-6770-5p      | 1 |
| <i>circMED13</i> | miR-6771-5p      | 1 |

|                  |                     |   |
|------------------|---------------------|---|
| <i>circMED13</i> | miR-6796-5p         | 1 |
| <i>circMED13</i> | miR-6804-3p         | 1 |
| <i>circMED13</i> | miR-6815-5p/6865-5p | 1 |
| <i>circMED13</i> | miR-6816-3p         | 1 |
| <i>circMED13</i> | miR-6818-5p         | 1 |
| <i>circMED13</i> | miR-6827-5p         | 1 |
| <i>circMED13</i> | miR-6833-5p         | 1 |
| <i>circMED13</i> | miR-6838-3p         | 1 |
| <i>circMED13</i> | miR-6864-5p         | 1 |
| <i>circMED13</i> | miR-6867-5p         | 1 |
| <i>circMED13</i> | miR-6880-5p         | 1 |
| <i>circMED13</i> | miR-6886-3p         | 1 |
| <i>circMED13</i> | miR-6888-5p         | 1 |
| <i>circMED13</i> | miR-7161-3p         | 1 |
| <i>circMED13</i> | miR-744-3p          | 1 |
| <i>circMED13</i> | miR-759             | 1 |
| <i>circMED13</i> | miR-766-3p          | 1 |
| <i>circMED13</i> | miR-7843-3p         | 1 |
| <i>circMED13</i> | miR-7850-5p         | 1 |
| <i>circMED13</i> | miR-7855-5p         | 1 |
| <i>circMED13</i> | miR-8056            | 1 |
| <i>circMED13</i> | miR-8057            | 1 |
| <i>circMED13</i> | miR-8060            | 1 |
| <i>circMED13</i> | miR-8066            | 1 |
| <i>circMED13</i> | miR-8069            | 1 |
| <i>circMED13</i> | miR-8071            | 1 |
| <i>circMED13</i> | miR-8076            | 1 |
| <i>circMED13</i> | miR-8080            | 1 |
| <i>circMED13</i> | miR-874-3p          | 1 |
| <i>circMED13</i> | miR-9-5p            | 1 |
| <i>circMED13</i> | miR-938             | 1 |
| <i>circMED13</i> | miR-943             | 1 |
| <i>circMED13</i> | miR-944             | 1 |
| <i>circMED13</i> | miR-105-5p          | 1 |
| <i>circMED13</i> | miR-1184            | 2 |
| <i>circMED13</i> | miR-1202/3972       | 1 |
| <i>circMED13</i> | miR-1205            | 2 |
| <i>circMED13</i> | miR-1207-3p         | 1 |

|                  |                     |   |
|------------------|---------------------|---|
| <i>circMED13</i> | miR-1226-5p         | 1 |
| <i>circMED13</i> | miR-1237-3p         | 1 |
| <i>circMED13</i> | miR-1248            | 1 |
| <i>circMED13</i> | miR-1261            | 1 |
| <i>circMED13</i> | miR-1269            | 1 |
| <i>circMED13</i> | miR-1273h-3p        | 1 |
| <i>circMED13</i> | miR-1276            | 1 |
| <i>circMED13</i> | miR-1279            | 1 |
| <i>circMED13</i> | miR-1288-3p         | 1 |
| <i>circMED13</i> | miR-1290            | 1 |
| <i>circMED13</i> | miR-1298-3p         | 1 |
| <i>circMED13</i> | miR-1299            | 1 |
| <i>circMED13</i> | miR-1304-5p         | 1 |
| <i>circMED13</i> | miR-148b-5p/6874-3p | 3 |
| <i>circMED13</i> | miR-155-3p          | 1 |
| <i>circMED13</i> | miR-15b-3p          | 1 |
| <i>circMED13</i> | miR-16-2-3p/195-3p  | 1 |
| <i>circMED13</i> | miR-17-3p           | 2 |
| <i>circMED13</i> | miR-186-5p          | 1 |
| <i>circMED13</i> | miR-205-5p          | 1 |
| <i>circMED13</i> | miR-20b-3p          | 1 |
| <i>circMED13</i> | miR-21-3p/3591-3p   | 1 |
| <i>circMED13</i> | miR-211-3p          | 1 |
| <i>circMED13</i> | miR-2115-3p         | 1 |
| <i>circMED13</i> | miR-217             | 1 |
| <i>circMED13</i> | miR-219a-1-3p       | 1 |
| <i>circMED13</i> | miR-219a-2-3p       | 1 |
| <i>circMED13</i> | miR-219b-3p         | 1 |
| <i>circMED13</i> | miR-22-3p           | 2 |
| <i>circMED13</i> | miR-26b-3p          | 1 |
| <i>circMED13</i> | miR-28-5p/708-5p    | 1 |
| <i>circMED13</i> | miR-2861            | 1 |
| <i>circMED13</i> | miR-29b-1-5p        | 1 |
| <i>circMED13</i> | miR-302f            | 2 |
| <i>circMED13</i> | miR-3064-3p         | 1 |
| <i>circMED13</i> | miR-3115            | 1 |
| <i>circMED13</i> | miR-3121-3p         | 1 |
| <i>circMED13</i> | miR-3126-3p         | 1 |

|                  |                     |   |
|------------------|---------------------|---|
| <i>circMED13</i> | miR-3126-5p         | 1 |
| <i>circMED13</i> | miR-3127-5p         | 1 |
| <i>circMED13</i> | miR-3133            | 1 |
| <i>circMED13</i> | miR-3137            | 1 |
| <i>circMED13</i> | miR-3140-5p         | 1 |
| <i>circMED13</i> | miR-3148            | 1 |
| <i>circMED13</i> | miR-3154            | 1 |
| <i>circMED13</i> | miR-3158-5p         | 2 |
| <i>circMED13</i> | miR-3161            | 1 |
| <i>circMED13</i> | miR-3163            | 1 |
| <i>circMED13</i> | miR-3168            | 3 |
| <i>circMED13</i> | miR-3182            | 1 |
| <i>circMED13</i> | miR-3189-5p         | 1 |
| <i>circMED13</i> | miR-3194-5p         | 1 |
| <i>circMED13</i> | miR-323b-3p         | 1 |
| <i>circMED13</i> | miR-325             | 1 |
| <i>circMED13</i> | miR-329-5p          | 1 |
| <i>circMED13</i> | miR-339-3p          | 1 |
| <i>circMED13</i> | miR-345-3p          | 1 |
| <i>circMED13</i> | miR-34a-3p          | 1 |
| <i>circMED13</i> | miR-3529-3p         | 2 |
| <i>circMED13</i> | miR-3616-3p         | 1 |
| <i>circMED13</i> | miR-3617-3p         | 1 |
| <i>circMED13</i> | miR-365-3p          | 1 |
| <i>circMED13</i> | miR-3662            | 1 |
| <i>circMED13</i> | miR-3671            | 2 |
| <i>circMED13</i> | miR-3678-3p         | 1 |
| <i>circMED13</i> | miR-3679-3p         | 1 |
| <i>circMED13</i> | miR-3680-3p         | 1 |
| <i>circMED13</i> | miR-3682-3p         | 2 |
| <i>circMED13</i> | miR-3686            | 1 |
| <i>circMED13</i> | miR-369-3p          | 1 |
| <i>circMED13</i> | miR-3690            | 2 |
| <i>circMED13</i> | miR-376b-5p/376c-5p | 1 |
| <i>circMED13</i> | miR-377-5p/6086     | 1 |
| <i>circMED13</i> | miR-378j/6839-5p    | 1 |
| <i>circMED13</i> | miR-380-5p/563      | 1 |
| <i>circMED13</i> | miR-381-3p          | 1 |

|                  |                                              |   |
|------------------|----------------------------------------------|---|
| <i>circMED13</i> | miR-383-5p.1                                 | 1 |
| <i>circMED13</i> | miR-3914                                     | 1 |
| <i>circMED13</i> | miR-3918                                     | 1 |
| <i>circMED13</i> | miR-3927-5p                                  | 1 |
| <i>circMED13</i> | miR-3928-3p                                  | 1 |
| <i>circMED13</i> | miR-3943                                     | 1 |
| <i>circMED13</i> | miR-4254                                     | 2 |
| <i>circMED13</i> | miR-4259                                     | 1 |
| <i>circMED13</i> | miR-4267                                     | 1 |
| <i>circMED13</i> | miR-4277                                     | 1 |
| <i>circMED13</i> | miR-4282                                     | 3 |
| <i>circMED13</i> | miR-4291                                     | 1 |
| <i>circMED13</i> | miR-4293                                     | 1 |
| <i>circMED13</i> | miR-4297/5581-5p                             | 1 |
| <i>circMED13</i> | miR-4307                                     | 1 |
| <i>circMED13</i> | miR-4311                                     | 1 |
| <i>circMED13</i> | miR-4313                                     | 1 |
| <i>circMED13</i> | miR-4323                                     | 1 |
| <i>circMED13</i> | miR-4419a/4510/6127/6129/6130/6133           | 1 |
| <i>circMED13</i> | miR-4436b-3p/4632-5p/6735-5p/6879-5p/7843-5p | 1 |
| <i>circMED13</i> | miR-4443                                     | 1 |
| <i>circMED13</i> | miR-4446-5p                                  | 1 |
| <i>circMED13</i> | miR-4460                                     | 1 |
| <i>circMED13</i> | miR-4461                                     | 1 |
| <i>circMED13</i> | miR-4496                                     | 2 |
| <i>circMED13</i> | miR-450b-5p                                  | 1 |
| <i>circMED13</i> | miR-4512                                     | 1 |
| <i>circMED13</i> | miR-4515                                     | 1 |
| <i>circMED13</i> | miR-4517                                     | 2 |
| <i>circMED13</i> | miR-4520-2-3p                                | 1 |
| <i>circMED13</i> | miR-4529-3p                                  | 1 |
| <i>circMED13</i> | miR-4535                                     | 1 |
| <i>circMED13</i> | miR-4652-3p                                  | 1 |
| <i>circMED13</i> | miR-4659a-3p/4659b-3p                        | 1 |
| <i>circMED13</i> | miR-4659a-5p/4659b-5p                        | 1 |
| <i>circMED13</i> | miR-4666a-3p                                 | 1 |
| <i>circMED13</i> | miR-4686                                     | 1 |
| <i>circMED13</i> | miR-4698                                     | 1 |

|                  |                                         |   |
|------------------|-----------------------------------------|---|
| <i>circMED13</i> | miR-4699-3p                             | 1 |
| <i>circMED13</i> | miR-4700-3p                             | 2 |
| <i>circMED13</i> | miR-4708-3p                             | 1 |
| <i>circMED13</i> | miR-4715-5p                             | 1 |
| <i>circMED13</i> | miR-4716-5p                             | 1 |
| <i>circMED13</i> | miR-4721                                | 1 |
| <i>circMED13</i> | miR-4727-3p                             | 1 |
| <i>circMED13</i> | miR-4727-5p                             | 1 |
| <i>circMED13</i> | miR-4740-5p                             | 1 |
| <i>circMED13</i> | miR-4743-3p                             | 1 |
| <i>circMED13</i> | miR-4758-3p                             | 1 |
| <i>circMED13</i> | miR-4761-3p                             | 1 |
| <i>circMED13</i> | miR-4762-3p                             | 1 |
| <i>circMED13</i> | miR-4764-5p                             | 1 |
| <i>circMED13</i> | miR-4766-5p                             | 2 |
| <i>circMED13</i> | miR-4772-5p                             | 1 |
| <i>circMED13</i> | miR-4776-3p                             | 1 |
| <i>circMED13</i> | miR-4776-5p                             | 1 |
| <i>circMED13</i> | miR-4782-5p/5706                        | 1 |
| <i>circMED13</i> | miR-4795-3p                             | 1 |
| <i>circMED13</i> | miR-4796-5p                             | 1 |
| <i>circMED13</i> | miR-4799-5p                             | 2 |
| <i>circMED13</i> | miR-4803                                | 1 |
| <i>circMED13</i> | miR-497-3p                              | 1 |
| <i>circMED13</i> | miR-5000-5p                             | 1 |
| <i>circMED13</i> | miR-5001-3p                             | 1 |
| <i>circMED13</i> | miR-5006-5p                             | 1 |
| <i>circMED13</i> | miR-5009-5p/8058                        | 1 |
| <i>circMED13</i> | miR-507/557                             | 1 |
| <i>circMED13</i> | miR-509-3-5p/509-5p/4418                | 1 |
| <i>circMED13</i> | miR-5093                                | 2 |
| <i>circMED13</i> | miR-5100                                | 1 |
| <i>circMED13</i> | miR-516b-5p                             | 1 |
| <i>circMED13</i> | miR-5187-5p                             | 1 |
| <i>circMED13</i> | miR-5197-3p                             | 1 |
| <i>circMED13</i> | miR-520f-5p                             | 1 |
| <i>circMED13</i> | miR-541-5p                              | 1 |
| <i>circMED13</i> | miR-548ac/548bb-3p/548d-3p/548h-3p/548z | 1 |

|                  |                                                                  |   |
|------------------|------------------------------------------------------------------|---|
| <i>circMED13</i> | miR-548aq-3p/548am-3p/548aj-3p/548ah13p/548ae-3p/548j-3p/548x-3p |   |
| <i>circMED13</i> | miR-548az-3p/548ar-3p/548a-3p/548e-3p/548f-3p                    |   |
| <i>circMED13</i> | miR-548c-3p                                                      | 1 |
| <i>circMED13</i> | miR-548p                                                         | 1 |
| <i>circMED13</i> | miR-548u/7161-5p                                                 | 1 |
| <i>circMED13</i> | miR-551b-5p                                                      | 1 |
| <i>circMED13</i> | miR-5571-5p                                                      | 1 |
| <i>circMED13</i> | miR-5579-5p                                                      | 1 |
| <i>circMED13</i> | miR-5580-3p                                                      | 1 |
| <i>circMED13</i> | miR-5581-3p                                                      | 1 |
| <i>circMED13</i> | miR-5582-3p                                                      | 1 |
| <i>circMED13</i> | miR-5583-3p                                                      | 2 |
| <i>circMED13</i> | miR-5584-3p                                                      | 3 |
| <i>circMED13</i> | miR-5585-3p                                                      | 2 |
| <i>circMED13</i> | miR-5590-5p                                                      | 1 |
| <i>circMED13</i> | miR-5684                                                         | 1 |
| <i>circMED13</i> | miR-5692bc                                                       | 1 |
| <i>circMED13</i> | miR-5699-5p                                                      | 1 |
| <i>circMED13</i> | miR-571                                                          | 1 |
| <i>circMED13</i> | miR-575/4676-5p                                                  | 1 |
| <i>circMED13</i> | miR-583                                                          | 1 |
| <i>circMED13</i> | miR-584-5p                                                       | 1 |
| <i>circMED13</i> | miR-587                                                          | 1 |
| <i>circMED13</i> | miR-596                                                          | 1 |
| <i>circMED13</i> | miR-607                                                          | 1 |
| <i>circMED13</i> | miR-6124                                                         | 1 |
| <i>circMED13</i> | miR-619-3p                                                       | 2 |
| <i>circMED13</i> | miR-628-3p                                                       | 1 |
| <i>circMED13</i> | miR-641/3617-5p                                                  | 1 |
| <i>circMED13</i> | miR-6505-5p                                                      | 1 |
| <i>circMED13</i> | miR-6507-5p                                                      | 1 |
| <i>circMED13</i> | miR-651-3p                                                       | 2 |
| <i>circMED13</i> | miR-6515-5p                                                      | 1 |
| <i>circMED13</i> | miR-654-3p                                                       | 2 |
| <i>circMED13</i> | miR-655-5p                                                       | 1 |
| <i>circMED13</i> | miR-656-3p                                                       | 1 |
| <i>circMED13</i> | miR-664a-3p                                                      | 1 |
| <i>circMED13</i> | miR-6715a-3p                                                     | 1 |

|                  |              |   |
|------------------|--------------|---|
| <i>circMED13</i> | miR-6734-5p  | 1 |
| <i>circMED13</i> | miR-6757-5p  | 1 |
| <i>circMED13</i> | miR-676-5p   | 2 |
| <i>circMED13</i> | miR-6769a-3p | 1 |
| <i>circMED13</i> | miR-6793-3p  | 2 |
| <i>circMED13</i> | miR-6800-3p  | 1 |
| <i>circMED13</i> | miR-6830-5p  | 1 |
| <i>circMED13</i> | miR-6834-5p  | 1 |
| <i>circMED13</i> | miR-6858-3p  | 1 |
| <i>circMED13</i> | miR-6871-5p  | 1 |
| <i>circMED13</i> | miR-6873-5p  | 1 |
| <i>circMED13</i> | miR-6875-3p  | 1 |
| <i>circMED13</i> | miR-6884-3p  | 1 |
| <i>circMED13</i> | miR-6890-3p  | 1 |
| <i>circMED13</i> | miR-6894-5p  | 1 |
| <i>circMED13</i> | miR-6895-5p  | 1 |
| <i>circMED13</i> | miR-7109-3p  | 1 |
| <i>circMED13</i> | miR-711      | 1 |
| <i>circMED13</i> | miR-7154-3p  | 1 |
| <i>circMED13</i> | miR-7160-3p  | 1 |
| <i>circMED13</i> | miR-758-5p   | 1 |
| <i>circMED13</i> | miR-765      | 1 |
| <i>circMED13</i> | miR-766-5p   | 1 |
| <i>circMED13</i> | miR-7851-3p  | 2 |
| <i>circMED13</i> | miR-8063     | 1 |
| <i>circMED13</i> | miR-873-5p.1 | 1 |
| <i>circMED13</i> | miR-875-3p   | 2 |
| <i>circMED13</i> | miR-876-5p   | 1 |
| <i>circMED13</i> | miR-9-3p     | 1 |
| <i>circMED13</i> | miR-1178-3p  | 1 |
| <i>circMED13</i> | miR-1229-3p  | 1 |
| <i>circMED13</i> | miR-1231     | 2 |
| <i>circMED13</i> | miR-1256     | 1 |
| <i>circMED13</i> | miR-1257     | 1 |
| <i>circMED13</i> | miR-1273e    | 1 |
| <i>circMED13</i> | miR-1273f    | 1 |
| <i>circMED13</i> | miR-1283     | 1 |
| <i>circMED13</i> | miR-1285-5p  | 1 |



|                  |                     |   |
|------------------|---------------------|---|
| <i>circMED13</i> | miR-132-3p/212-3p   | 2 |
| <i>circMED13</i> | miR-139-3p          | 1 |
| <i>circMED13</i> | miR-141-3p/200-3p   | 1 |
| <i>circMED13</i> | miR-143-3p          | 1 |
| <i>circMED13</i> | miR-148a-5p         | 2 |
| <i>circMED13</i> | miR-183-5p.1        | 1 |
| <i>circMED13</i> | miR-183-5p.2        | 1 |
| <i>circMED13</i> | miR-190-5p          | 1 |
| <i>circMED13</i> | miR-1915-5p         | 1 |
| <i>circMED13</i> | miR-196b-3p         | 1 |
| <i>circMED13</i> | miR-199-3p          | 2 |
| <i>circMED13</i> | miR-200ab-5p        | 1 |
| <i>circMED13</i> | miR-219b-5p         | 2 |
| <i>circMED13</i> | miR-221-3p/222-3p   | 1 |
| <i>circMED13</i> | miR-2277-3p         | 1 |
| <i>circMED13</i> | miR-2355-3p         | 1 |
| <i>circMED13</i> | miR-27-3p           | 1 |
| <i>circMED13</i> | miR-3120-3p         | 1 |
| <i>circMED13</i> | miR-3122/3913-5p    | 1 |
| <i>circMED13</i> | miR-3144-3p         | 1 |
| <i>circMED13</i> | miR-3173-3p/6891-5p | 1 |
| <i>circMED13</i> | miR-3185            | 1 |
| <i>circMED13</i> | miR-3190-3p         | 1 |
| <i>circMED13</i> | miR-3192-3p         | 1 |
| <i>circMED13</i> | miR-3193            | 1 |
| <i>circMED13</i> | miR-337-3p          | 1 |
| <i>circMED13</i> | miR-342-3p          | 1 |
| <i>circMED13</i> | miR-3613-3p         | 1 |
| <i>circMED13</i> | miR-3614-5p         | 1 |
| <i>circMED13</i> | miR-3620-3p         | 1 |
| <i>circMED13</i> | miR-370-3p          | 1 |
| <i>circMED13</i> | miR-3908            | 1 |
| <i>circMED13</i> | miR-3920            | 1 |
| <i>circMED13</i> | miR-3942-5p         | 1 |
| <i>circMED13</i> | miR-409-3p          | 1 |
| <i>circMED13</i> | miR-411-5p.1        | 2 |
| <i>circMED13</i> | miR-412-3p/6754-3p  | 1 |
| <i>circMED13</i> | miR-421             | 1 |

|                  |                     |   |
|------------------|---------------------|---|
| <i>circMED13</i> | miR-4264            | 1 |
| <i>circMED13</i> | miR-4268            | 1 |
| <i>circMED13</i> | miR-4269/6715b-5p   | 1 |
| <i>circMED13</i> | miR-4272            | 1 |
| <i>circMED13</i> | miR-4276            | 1 |
| <i>circMED13</i> | miR-4426/4647/4662b | 3 |
| <i>circMED13</i> | miR-4428            | 1 |
| <i>circMED13</i> | miR-4438            | 1 |
| <i>circMED13</i> | miR-4448            | 1 |
| <i>circMED13</i> | miR-4476/6876-5p    | 1 |
| <i>circMED13</i> | miR-4482-3p         | 1 |
| <i>circMED13</i> | miR-450a-1-3p       | 1 |
| <i>circMED13</i> | miR-4514/4692       | 1 |
| <i>circMED13</i> | miR-4524a-3p        | 1 |
| <i>circMED13</i> | miR-4633-5p         | 1 |
| <i>circMED13</i> | miR-4635            | 1 |
| <i>circMED13</i> | miR-4639-3p         | 1 |
| <i>circMED13</i> | miR-4641            | 1 |
| <i>circMED13</i> | miR-4646-3p         | 1 |
| <i>circMED13</i> | miR-4666b           | 1 |
| <i>circMED13</i> | miR-4670-3p         | 2 |
| <i>circMED13</i> | miR-4683            | 1 |
| <i>circMED13</i> | miR-4708-5p         | 1 |
| <i>circMED13</i> | miR-4709-5p         | 1 |
| <i>circMED13</i> | miR-4724-3p         | 1 |
| <i>circMED13</i> | miR-4742-3p         | 1 |
| <i>circMED13</i> | miR-4742-5p         | 1 |
| <i>circMED13</i> | miR-4747-5p/5196-5p | 2 |
| <i>circMED13</i> | miR-4780            | 1 |
| <i>circMED13</i> | miR-4781-3p         | 1 |
| <i>circMED13</i> | miR-4790-3p         | 1 |
| <i>circMED13</i> | miR-4797-3p         | 1 |
| <i>circMED13</i> | miR-486-5p          | 1 |
| <i>circMED13</i> | miR-498             | 1 |
| <i>circMED13</i> | miR-5000-3p         | 1 |
| <i>circMED13</i> | miR-5011-3p         | 1 |
| <i>circMED13</i> | miR-505-3p.2        | 1 |
| <i>circMED13</i> | miR-506-5p          | 1 |

|                  |              |   |
|------------------|--------------|---|
| <i>circMED13</i> | miR-509-3p   | 1 |
| <i>circMED13</i> | miR-513a-5p  | 1 |
| <i>circMED13</i> | miR-5197-5p  | 1 |
| <i>circMED13</i> | miR-524-5p   | 1 |
| <i>circMED13</i> | miR-545-3p   | 1 |
| <i>circMED13</i> | miR-548g-3p  | 1 |
| <i>circMED13</i> | miR-548v     | 1 |
| <i>circMED13</i> | miR-568      | 1 |
| <i>circMED13</i> | miR-5690     | 1 |
| <i>circMED13</i> | miR-576-3p   | 2 |
| <i>circMED13</i> | miR-6077     | 3 |
| <i>circMED13</i> | miR-622      | 1 |
| <i>circMED13</i> | miR-632/4288 | 2 |
| <i>circMED13</i> | miR-6500-3p  | 1 |
| <i>circMED13</i> | miR-6503-3p  | 1 |
| <i>circMED13</i> | miR-6513-5p  | 1 |
| <i>circMED13</i> | miR-6516-3p  | 1 |
| <i>circMED13</i> | miR-676-3p   | 1 |
| <i>circMED13</i> | miR-6772-3p  | 1 |
| <i>circMED13</i> | miR-6780b-3p | 1 |
| <i>circMED13</i> | miR-6782-3p  | 1 |
| <i>circMED13</i> | miR-6802-3p  | 1 |
| <i>circMED13</i> | miR-6831-3p  | 1 |
| <i>circMED13</i> | miR-6837-3p  | 1 |
| <i>circMED13</i> | miR-6841-3p  | 1 |
| <i>circMED13</i> | miR-6865-3p  | 1 |
| <i>circMED13</i> | miR-6868-3p  | 1 |
| <i>circMED13</i> | miR-7-5p     | 3 |
| <i>circMED13</i> | miR-7158-5p  | 1 |
| <i>circMED13</i> | miR-7159-3p  | 1 |
| <i>circMED13</i> | miR-7159-5p  | 1 |
| <i>circMED13</i> | miR-767-3p   | 1 |
| <i>circMED13</i> | miR-8068     | 1 |
| <i>circMED13</i> | miR-887-5p   | 1 |
| <i>circMED13</i> | miR-892-5p   | 1 |
| <i>circMED13</i> | miR-892b     | 1 |
| <i>circMED13</i> | miR-936      | 2 |
| <i>circMEIS3</i> | miR-106b-3p  | 1 |

|                  |                          |   |
|------------------|--------------------------|---|
| <i>circMEIS3</i> | miR-1197                 | 2 |
| <i>circMEIS3</i> | miR-1203                 | 2 |
| <i>circMEIS3</i> | miR-1224-3p              | 2 |
| <i>circMEIS3</i> | miR-1228-3p              | 1 |
| <i>circMEIS3</i> | miR-1234-3p/7107-5p      | 4 |
| <i>circMEIS3</i> | miR-1236-3p              | 7 |
| <i>circMEIS3</i> | miR-1243                 | 3 |
| <i>circMEIS3</i> | miR-1249-5p/6797-5p      | 1 |
| <i>circMEIS3</i> | miR-1253                 | 1 |
| <i>circMEIS3</i> | miR-125a-3p              | 1 |
| <i>circMEIS3</i> | miR-1260a/1260b          | 1 |
| <i>circMEIS3</i> | miR-1262/4701-3p/6736-5p | 1 |
| <i>circMEIS3</i> | miR-1272                 | 1 |
| <i>circMEIS3</i> | miR-1273d                | 3 |
| <i>circMEIS3</i> | miR-128-1-5p             | 2 |
| <i>circMEIS3</i> | miR-129-3p               | 1 |
| <i>circMEIS3</i> | miR-1291/6775-3p         | 3 |
| <i>circMEIS3</i> | miR-1293/4483            | 2 |
| <i>circMEIS3</i> | miR-1295b-5p/1912        | 4 |
| <i>circMEIS3</i> | miR-1322                 | 1 |
| <i>circMEIS3</i> | miR-138-1-3p             | 2 |
| <i>circMEIS3</i> | miR-140-3p.2             | 1 |
| <i>circMEIS3</i> | miR-141-5p               | 4 |
| <i>circMEIS3</i> | miR-146b-3p              | 3 |
| <i>circMEIS3</i> | miR-1470                 | 2 |
| <i>circMEIS3</i> | miR-148-3p/152-3p        | 1 |
| <i>circMEIS3</i> | miR-149-5p               | 3 |
| <i>circMEIS3</i> | miR-150-5p               | 3 |
| <i>circMEIS3</i> | miR-151-5p               | 3 |
| <i>circMEIS3</i> | miR-1538/4745-3p         | 1 |
| <i>circMEIS3</i> | miR-1587/3620-5p         | 2 |
| <i>circMEIS3</i> | miR-16-1-3p              | 1 |
| <i>circMEIS3</i> | miR-187-5p               | 2 |
| <i>circMEIS3</i> | miR-188-3p               | 1 |
| <i>circMEIS3</i> | miR-18a-3p               | 1 |
| <i>circMEIS3</i> | miR-18b-3p               | 1 |
| <i>circMEIS3</i> | miR-1908-5p              | 1 |
| <i>circMEIS3</i> | miR-1911-3p              | 2 |

|                  |                           |   |
|------------------|---------------------------|---|
| <i>circMEIS3</i> | miR-1915-3p/6764-5p       | 4 |
| <i>circMEIS3</i> | miR-192-3p                | 2 |
| <i>circMEIS3</i> | miR-193-3p                | 2 |
| <i>circMEIS3</i> | miR-196b-3p               | 1 |
| <i>circMEIS3</i> | miR-203a-3p.1             | 2 |
| <i>circMEIS3</i> | miR-203b-3p               | 2 |
| <i>circMEIS3</i> | miR-205-5p                | 2 |
| <i>circMEIS3</i> | miR-210-5p                | 4 |
| <i>circMEIS3</i> | miR-2110                  | 2 |
| <i>circMEIS3</i> | miR-2115-5p               | 1 |
| <i>circMEIS3</i> | miR-2116-3p               | 3 |
| <i>circMEIS3</i> | miR-216a-5p               | 1 |
| <i>circMEIS3</i> | miR-216b-5p               | 1 |
| <i>circMEIS3</i> | miR-22-3p                 | 1 |
| <i>circMEIS3</i> | miR-221-3p/222-3p         | 2 |
| <i>circMEIS3</i> | miR-221-5p/8073           | 1 |
| <i>circMEIS3</i> | miR-2276-5p               | 5 |
| <i>circMEIS3</i> | miR-2277-3p               | 1 |
| <i>circMEIS3</i> | miR-2355-5p               | 1 |
| <i>circMEIS3</i> | miR-2392                  | 1 |
| <i>circMEIS3</i> | miR-2682-3p/6781-3p       | 2 |
| <i>circMEIS3</i> | miR-26b-3p                | 1 |
| <i>circMEIS3</i> | miR-296-5p                | 1 |
| <i>circMEIS3</i> | miR-301a-5p/301b-5p       | 5 |
| <i>circMEIS3</i> | miR-3064-3p               | 2 |
| <i>circMEIS3</i> | miR-3121-5p               | 2 |
| <i>circMEIS3</i> | miR-3126-5p               | 1 |
| <i>circMEIS3</i> | miR-3130-5p/4482-5p       | 4 |
| <i>circMEIS3</i> | miR-3140-5p               | 1 |
| <i>circMEIS3</i> | miR-3144-5p               | 2 |
| <i>circMEIS3</i> | miR-3150a-3p              | 2 |
| <i>circMEIS3</i> | miR-3150b-3p              | 1 |
| <i>circMEIS3</i> | miR-3156-3p               | 1 |
| <i>circMEIS3</i> | miR-3160-3p               | 3 |
| <i>circMEIS3</i> | miR-3165                  | 1 |
| <i>circMEIS3</i> | miR-3173-5p               | 3 |
| <i>circMEIS3</i> | miR-3183/4723-3p/6769b-3p | 2 |
| <i>circMEIS3</i> | miR-3190-3p               | 1 |

|                  |                           |   |
|------------------|---------------------------|---|
| <i>circMEIS3</i> | miR-3191-3p               | 2 |
| <i>circMEIS3</i> | miR-3192-3p               | 2 |
| <i>circMEIS3</i> | miR-3194-3p               | 3 |
| <i>circMEIS3</i> | miR-3194-5p               | 1 |
| <i>circMEIS3</i> | miR-3202                  | 1 |
| <i>circMEIS3</i> | miR-324-3p/1913           | 1 |
| <i>circMEIS3</i> | miR-328-3p                | 4 |
| <i>circMEIS3</i> | miR-329-3p/362-3p         | 1 |
| <i>circMEIS3</i> | miR-331-3p                | 4 |
| <i>circMEIS3</i> | miR-33b-3p/515-3p/519e-3p | 1 |
| <i>circMEIS3</i> | miR-342-5p/4664-5p        | 1 |
| <i>circMEIS3</i> | miR-345-3p                | 1 |
| <i>circMEIS3</i> | miR-346                   | 2 |
| <i>circMEIS3</i> | miR-361-3p                | 1 |
| <i>circMEIS3</i> | miR-3611                  | 2 |
| <i>circMEIS3</i> | miR-363-5p/6745           | 2 |
| <i>circMEIS3</i> | miR-3652/4430             | 2 |
| <i>circMEIS3</i> | miR-3654                  | 3 |
| <i>circMEIS3</i> | miR-3663-5p               | 2 |
| <i>circMEIS3</i> | miR-3665                  | 1 |
| <i>circMEIS3</i> | miR-3677-3p               | 1 |
| <i>circMEIS3</i> | miR-3679-3p               | 2 |
| <i>circMEIS3</i> | miR-3689d/6851-5p         | 2 |
| <i>circMEIS3</i> | miR-3690                  | 2 |
| <i>circMEIS3</i> | miR-3691-5p               | 1 |
| <i>circMEIS3</i> | miR-371a-3p               | 1 |
| <i>circMEIS3</i> | miR-371b-3p               | 1 |
| <i>circMEIS3</i> | miR-378-3p                | 3 |
| <i>circMEIS3</i> | miR-378g                  | 2 |
| <i>circMEIS3</i> | miR-381-5p                | 1 |
| <i>circMEIS3</i> | miR-3913-3p               | 3 |
| <i>circMEIS3</i> | miR-3918                  | 1 |
| <i>circMEIS3</i> | miR-3919                  | 2 |
| <i>circMEIS3</i> | miR-3920                  | 2 |
| <i>circMEIS3</i> | miR-3921/4653-5p          | 5 |
| <i>circMEIS3</i> | miR-3934-5p               | 1 |
| <i>circMEIS3</i> | miR-3943                  | 1 |
| <i>circMEIS3</i> | miR-423-5p                | 1 |

|                  |                                    |   |
|------------------|------------------------------------|---|
| <i>circMEIS3</i> | miR-4251                           | 3 |
| <i>circMEIS3</i> | miR-4254                           | 2 |
| <i>circMEIS3</i> | miR-4268                           | 2 |
| <i>circMEIS3</i> | miR-4269/6715b-5p                  | 1 |
| <i>circMEIS3</i> | miR-4274                           | 1 |
| <i>circMEIS3</i> | miR-4279                           | 3 |
| <i>circMEIS3</i> | miR-4292/6791-5p                   | 5 |
| <i>circMEIS3</i> | miR-4303                           | 3 |
| <i>circMEIS3</i> | miR-4308                           | 5 |
| <i>circMEIS3</i> | miR-4313                           | 1 |
| <i>circMEIS3</i> | miR-432-3p                         | 1 |
| <i>circMEIS3</i> | miR-432-5p                         | 1 |
| <i>circMEIS3</i> | miR-4323                           | 1 |
| <i>circMEIS3</i> | miR-4329                           | 3 |
| <i>circMEIS3</i> | miR-4417                           | 1 |
| <i>circMEIS3</i> | miR-4419a/4510/6127/6129/6130/6133 | 1 |
| <i>circMEIS3</i> | miR-4434/4516/5703                 | 1 |
| <i>circMEIS3</i> | miR-4443                           | 2 |
| <i>circMEIS3</i> | miR-4448                           | 2 |
| <i>circMEIS3</i> | miR-4480                           | 2 |
| <i>circMEIS3</i> | miR-4486                           | 2 |
| <i>circMEIS3</i> | miR-4487                           | 3 |
| <i>circMEIS3</i> | miR-4493                           | 1 |
| <i>circMEIS3</i> | miR-4501                           | 2 |
| <i>circMEIS3</i> | miR-4505/5787                      | 2 |
| <i>circMEIS3</i> | miR-4508                           | 2 |
| <i>circMEIS3</i> | miR-4512                           | 1 |
| <i>circMEIS3</i> | miR-4514/4692                      | 1 |
| <i>circMEIS3</i> | miR-4519                           | 1 |
| <i>circMEIS3</i> | miR-4520-2-3p                      | 1 |
| <i>circMEIS3</i> | miR-4520-3p                        | 4 |
| <i>circMEIS3</i> | miR-4523                           | 1 |
| <i>circMEIS3</i> | miR-4524a-3p                       | 1 |
| <i>circMEIS3</i> | miR-4524b-3p                       | 1 |
| <i>circMEIS3</i> | miR-4529-3p                        | 1 |
| <i>circMEIS3</i> | miR-4533                           | 1 |
| <i>circMEIS3</i> | miR-4633-3p/6500-5p                | 2 |
| <i>circMEIS3</i> | miR-4638-3p                        | 3 |

|                  |                          |   |
|------------------|--------------------------|---|
| <i>circMEIS3</i> | miR-4640-3p              | 2 |
| <i>circMEIS3</i> | miR-4645-3p              | 1 |
| <i>circMEIS3</i> | miR-4645-5p/4673         | 2 |
| <i>circMEIS3</i> | miR-4652-5p              | 2 |
| <i>circMEIS3</i> | miR-4656                 | 2 |
| <i>circMEIS3</i> | miR-4666a-5p             | 2 |
| <i>circMEIS3</i> | miR-4667-3p              | 2 |
| <i>circMEIS3</i> | miR-4667-5p/4700-5p/8089 | 2 |
| <i>circMEIS3</i> | miR-4670-5p              | 1 |
| <i>circMEIS3</i> | miR-4674                 | 2 |
| <i>circMEIS3</i> | miR-4675/4741            | 2 |
| <i>circMEIS3</i> | miR-4685-5p/6837-5p      | 1 |
| <i>circMEIS3</i> | miR-4687-5p              | 1 |
| <i>circMEIS3</i> | miR-4690-3p/5685         | 2 |
| <i>circMEIS3</i> | miR-4690-5p              | 1 |
| <i>circMEIS3</i> | miR-4691-5p/6792-3p      | 3 |
| <i>circMEIS3</i> | miR-4695-5p              | 1 |
| <i>circMEIS3</i> | miR-4707-3p              | 2 |
| <i>circMEIS3</i> | miR-4709-3p              | 1 |
| <i>circMEIS3</i> | miR-4713-5p              | 2 |
| <i>circMEIS3</i> | miR-4722-3p/6727-3p      | 2 |
| <i>circMEIS3</i> | miR-4726-3p              | 4 |
| <i>circMEIS3</i> | miR-4731-5p              | 4 |
| <i>circMEIS3</i> | miR-4738-5p              | 1 |
| <i>circMEIS3</i> | miR-4739                 | 1 |
| <i>circMEIS3</i> | miR-4742-5p              | 1 |
| <i>circMEIS3</i> | miR-4743-5p              | 2 |
| <i>circMEIS3</i> | miR-4747-3p              | 3 |
| <i>circMEIS3</i> | miR-4749-3p              | 4 |
| <i>circMEIS3</i> | miR-4751                 | 2 |
| <i>circMEIS3</i> | miR-4753-3p              | 2 |
| <i>circMEIS3</i> | miR-4755-5p/5006-3p      | 2 |
| <i>circMEIS3</i> | miR-4756-3p              | 2 |
| <i>circMEIS3</i> | miR-4757-5p/6744-3p      | 3 |
| <i>circMEIS3</i> | miR-4776-3p              | 2 |
| <i>circMEIS3</i> | miR-4779                 | 1 |
| <i>circMEIS3</i> | miR-484/3155             | 1 |
| <i>circMEIS3</i> | miR-4999-3p              | 1 |



|                  |                                      |   |
|------------------|--------------------------------------|---|
| <i>circMEIS3</i> | miR-5004-5p                          | 2 |
| <i>circMEIS3</i> | miR-5008-5p                          | 3 |
| <i>circMEIS3</i> | miR-500b-3p                          | 1 |
| <i>circMEIS3</i> | miR-504-3p                           | 1 |
| <i>circMEIS3</i> | miR-5090/6775-5p                     | 2 |
| <i>circMEIS3</i> | miR-516a-3p/516b-3p/7162-5p          | 1 |
| <i>circMEIS3</i> | miR-5194                             | 1 |
| <i>circMEIS3</i> | miR-519d-5p                          | 3 |
| <i>circMEIS3</i> | miR-524-3p/525-3p                    | 1 |
| <i>circMEIS3</i> | miR-532-3p                           | 3 |
| <i>circMEIS3</i> | miR-539-5p                           | 2 |
| <i>circMEIS3</i> | miR-548v                             | 2 |
| <i>circMEIS3</i> | miR-556-5p                           | 1 |
| <i>circMEIS3</i> | miR-5579-3p                          | 1 |
| <i>circMEIS3</i> | miR-558                              | 3 |
| <i>circMEIS3</i> | miR-5589-5p                          | 4 |
| <i>circMEIS3</i> | miR-5591-3p                          | 1 |
| <i>circMEIS3</i> | miR-5680                             | 2 |
| <i>circMEIS3</i> | miR-5691                             | 2 |
| <i>circMEIS3</i> | miR-5695                             | 3 |
| <i>circMEIS3</i> | miR-5702                             | 1 |
| <i>circMEIS3</i> | miR-575/4676-5p                      | 1 |
| <i>circMEIS3</i> | miR-580-3p                           | 2 |
| <i>circMEIS3</i> | miR-589-3p                           | 3 |
| <i>circMEIS3</i> | miR-593-5p                           | 1 |
| <i>circMEIS3</i> | miR-603                              | 1 |
| <i>circMEIS3</i> | miR-605-3p                           | 1 |
| <i>circMEIS3</i> | miR-6069                             | 1 |
| <i>circMEIS3</i> | miR-6071                             | 2 |
| <i>circMEIS3</i> | miR-6079                             | 1 |
| <i>circMEIS3</i> | miR-608/4651                         | 1 |
| <i>circMEIS3</i> | miR-6089                             | 3 |
| <i>circMEIS3</i> | miR-611/3131                         | 3 |
| <i>circMEIS3</i> | miR-612/1285-3p/3187-5p/5189-5p/6860 | 2 |
| <i>circMEIS3</i> | miR-6134                             | 2 |
| <i>circMEIS3</i> | miR-6165                             | 1 |
| <i>circMEIS3</i> | miR-621                              | 1 |
| <i>circMEIS3</i> | miR-624-5p                           | 1 |

|                  |                       |   |
|------------------|-----------------------|---|
| <i>circMEIS3</i> | miR-629-3p            | 3 |
| <i>circMEIS3</i> | miR-637               | 2 |
| <i>circMEIS3</i> | miR-639               | 2 |
| <i>circMEIS3</i> | miR-642a-5p           | 2 |
| <i>circMEIS3</i> | miR-6510-5p           | 1 |
| <i>circMEIS3</i> | miR-6515-3p           | 7 |
| <i>circMEIS3</i> | miR-6515-5p           | 2 |
| <i>circMEIS3</i> | miR-652-5p            | 3 |
| <i>circMEIS3</i> | miR-654-5p            | 2 |
| <i>circMEIS3</i> | miR-657               | 1 |
| <i>circMEIS3</i> | miR-664a-5p/4794      | 3 |
| <i>circMEIS3</i> | miR-6729-3p           | 1 |
| <i>circMEIS3</i> | miR-6731-5p/8085      | 1 |
| <i>circMEIS3</i> | miR-6735-3p           | 1 |
| <i>circMEIS3</i> | miR-6741-5p           | 1 |
| <i>circMEIS3</i> | miR-6747-3p           | 2 |
| <i>circMEIS3</i> | miR-6747-5p           | 1 |
| <i>circMEIS3</i> | miR-6748-5p           | 1 |
| <i>circMEIS3</i> | miR-6749-3p           | 3 |
| <i>circMEIS3</i> | miR-6752-3p           | 2 |
| <i>circMEIS3</i> | miR-6753-5p           | 1 |
| <i>circMEIS3</i> | miR-6756-5p/6766-5p   | 2 |
| <i>circMEIS3</i> | miR-6758-5p/6856-5p   | 1 |
| <i>circMEIS3</i> | miR-6760-5p           | 1 |
| <i>circMEIS3</i> | miR-6761-5p           | 3 |
| <i>circMEIS3</i> | miR-6762-5p/6845-5p   | 2 |
| <i>circMEIS3</i> | miR-6763-3p           | 2 |
| <i>circMEIS3</i> | miR-6769a-3p          | 1 |
| <i>circMEIS3</i> | miR-6769a-5p/6769b-5p | 2 |
| <i>circMEIS3</i> | miR-6770-5p           | 1 |
| <i>circMEIS3</i> | miR-6772-3p           | 2 |
| <i>circMEIS3</i> | miR-6778-3p           | 1 |
| <i>circMEIS3</i> | miR-6779-3p           | 1 |
| <i>circMEIS3</i> | miR-6780a-3p          | 2 |
| <i>circMEIS3</i> | miR-6781-5p           | 2 |
| <i>circMEIS3</i> | miR-6782-5p           | 1 |
| <i>circMEIS3</i> | miR-6785-3p           | 2 |
| <i>circMEIS3</i> | miR-6791-3p/6829-3p   | 1 |

|                  |                     |   |
|------------------|---------------------|---|
| <i>circMEIS3</i> | miR-6793-5p         | 1 |
| <i>circMEIS3</i> | miR-6795-3p         | 5 |
| <i>circMEIS3</i> | miR-6801-3p/6810-3p | 4 |
| <i>circMEIS3</i> | miR-6804-3p         | 1 |
| <i>circMEIS3</i> | miR-6810-5p         | 2 |
| <i>circMEIS3</i> | miR-6812-3p         | 5 |
| <i>circMEIS3</i> | miR-6815-5p/6865-5p | 1 |
| <i>circMEIS3</i> | miR-6817-3p         | 4 |
| <i>circMEIS3</i> | miR-6828-3p         | 2 |
| <i>circMEIS3</i> | miR-6829-5p         | 2 |
| <i>circMEIS3</i> | miR-6830-3p         | 2 |
| <i>circMEIS3</i> | miR-6840-3p         | 4 |
| <i>circMEIS3</i> | miR-6843-3p/6848-3p | 2 |
| <i>circMEIS3</i> | miR-6844            | 2 |
| <i>circMEIS3</i> | miR-6845-3p         | 2 |
| <i>circMEIS3</i> | miR-6849-3p         | 1 |
| <i>circMEIS3</i> | miR-6850-3p         | 3 |
| <i>circMEIS3</i> | miR-6851-3p         | 3 |
| <i>circMEIS3</i> | miR-6857-5p         | 2 |
| <i>circMEIS3</i> | miR-6858-3p         | 1 |
| <i>circMEIS3</i> | miR-6867-3p         | 2 |
| <i>circMEIS3</i> | miR-6868-3p         | 2 |
| <i>circMEIS3</i> | miR-6873-3p         | 2 |
| <i>circMEIS3</i> | miR-6873-5p         | 1 |
| <i>circMEIS3</i> | miR-6877-5p         | 2 |
| <i>circMEIS3</i> | miR-6878-5p         | 1 |
| <i>circMEIS3</i> | miR-6880-5p         | 1 |
| <i>circMEIS3</i> | miR-6881-3p         | 2 |
| <i>circMEIS3</i> | miR-6882-3p         | 3 |
| <i>circMEIS3</i> | miR-6886-5p         | 2 |
| <i>circMEIS3</i> | miR-6887-3p         | 5 |
| <i>circMEIS3</i> | miR-6892-3p         | 5 |
| <i>circMEIS3</i> | miR-6895-5p         | 1 |
| <i>circMEIS3</i> | miR-7110-3p         | 4 |
| <i>circMEIS3</i> | miR-7111-3p         | 2 |
| <i>circMEIS3</i> | miR-7113-5p         | 1 |
| <i>circMEIS3</i> | miR-7152-3p         | 2 |
| <i>circMEIS3</i> | miR-7155-5p         | 2 |

|                  |                           |   |
|------------------|---------------------------|---|
| <i>circMEIS3</i> | miR-7158-3p               | 2 |
| <i>circMEIS3</i> | miR-7160-3p               | 1 |
| <i>circMEIS3</i> | miR-762/4492/4498/5001-5p | 2 |
| <i>circMEIS3</i> | miR-767-3p                | 2 |
| <i>circMEIS3</i> | miR-7854-3p               | 2 |
| <i>circMEIS3</i> | miR-7976                  | 3 |
| <i>circMEIS3</i> | miR-7977                  | 3 |
| <i>circMEIS3</i> | miR-8055                  | 2 |
| <i>circMEIS3</i> | miR-8056                  | 1 |
| <i>circMEIS3</i> | miR-8066                  | 2 |
| <i>circMEIS3</i> | miR-8071                  | 1 |
| <i>circMEIS3</i> | miR-8074                  | 1 |
| <i>circMEIS3</i> | miR-8485                  | 1 |
| <i>circMEIS3</i> | miR-874-5p                | 4 |
| <i>circMEIS3</i> | miR-92a-2-5p              | 2 |
| <i>circMEIS3</i> | miR-95-3p                 | 2 |
| <i>circMLIP</i>  | miR-1199-5p/6751-3p       | 1 |
| <i>circMLIP</i>  | miR-1206                  | 5 |
| <i>circMLIP</i>  | miR-1207-3p               | 2 |
| <i>circMLIP</i>  | miR-1236-3p               | 5 |
| <i>circMLIP</i>  | miR-1237-3p               | 1 |
| <i>circMLIP</i>  | miR-1248                  | 1 |
| <i>circMLIP</i>  | miR-1252-5p               | 2 |
| <i>circMLIP</i>  | miR-1270                  | 3 |
| <i>circMLIP</i>  | miR-1273d                 | 3 |
| <i>circMLIP</i>  | miR-1273g-3p              | 1 |
| <i>circMLIP</i>  | miR-1273g-5p              | 2 |
| <i>circMLIP</i>  | miR-1286                  | 5 |
| <i>circMLIP</i>  | miR-133a-5p               | 1 |
| <i>circMLIP</i>  | miR-135b-3p               | 3 |
| <i>circMLIP</i>  | miR-138-5p                | 1 |
| <i>circMLIP</i>  | miR-140-5p                | 2 |
| <i>circMLIP</i>  | miR-1468-3p               | 1 |
| <i>circMLIP</i>  | miR-152-5p                | 1 |
| <i>circMLIP</i>  | miR-153-3p                | 2 |
| <i>circMLIP</i>  | miR-15b-3p                | 1 |
| <i>circMLIP</i>  | miR-182-3p                | 2 |
| <i>circMLIP</i>  | miR-19-5p                 | 3 |

|                 |                           |   |
|-----------------|---------------------------|---|
| <i>circMLIP</i> | miR-203a-5p               | 2 |
| <i>circMLIP</i> | miR-2052                  | 3 |
| <i>circMLIP</i> | miR-208-3p                | 1 |
| <i>circMLIP</i> | miR-2110                  | 1 |
| <i>circMLIP</i> | miR-2115-3p               | 4 |
| <i>circMLIP</i> | miR-212-5p                | 1 |
| <i>circMLIP</i> | miR-218-1-3p              | 2 |
| <i>circMLIP</i> | miR-218-2-3p              | 2 |
| <i>circMLIP</i> | miR-219a-1-3p             | 1 |
| <i>circMLIP</i> | miR-22-3p                 | 1 |
| <i>circMLIP</i> | miR-2276-3p               | 2 |
| <i>circMLIP</i> | miR-2355-3p               | 2 |
| <i>circMLIP</i> | miR-26b-3p                | 4 |
| <i>circMLIP</i> | miR-29b-2-5p              | 3 |
| <i>circMLIP</i> | miR-30-3p                 | 6 |
| <i>circMLIP</i> | miR-3065-5p               | 2 |
| <i>circMLIP</i> | miR-3117-5p               | 1 |
| <i>circMLIP</i> | miR-3121-3p               | 4 |
| <i>circMLIP</i> | miR-3136-5p/4439          | 3 |
| <i>circMLIP</i> | miR-3144-5p               | 1 |
| <i>circMLIP</i> | miR-3148                  | 4 |
| <i>circMLIP</i> | miR-3150a-3p              | 1 |
| <i>circMLIP</i> | miR-3160-3p               | 1 |
| <i>circMLIP</i> | miR-3162-5p               | 1 |
| <i>circMLIP</i> | miR-3173-3p/6891-5p       | 2 |
| <i>circMLIP</i> | miR-3182                  | 1 |
| <i>circMLIP</i> | miR-3185                  | 2 |
| <i>circMLIP</i> | miR-3189-3p               | 1 |
| <i>circMLIP</i> | miR-3191-3p               | 1 |
| <i>circMLIP</i> | miR-3200-3p               | 2 |
| <i>circMLIP</i> | miR-323a-5p               | 1 |
| <i>circMLIP</i> | miR-330-3p.2              | 4 |
| <i>circMLIP</i> | miR-33b-3p/515-3p/519e-3p | 1 |
| <i>circMLIP</i> | miR-3613-5p               | 1 |
| <i>circMLIP</i> | miR-3614-3p               | 3 |
| <i>circMLIP</i> | miR-3649                  | 1 |
| <i>circMLIP</i> | miR-3652/4430             | 1 |
| <i>circMLIP</i> | miR-3667-5p               | 1 |

|                 |                    |   |
|-----------------|--------------------|---|
| <i>circMLIP</i> | miR-3670           | 4 |
| <i>circMLIP</i> | miR-3674           | 4 |
| <i>circMLIP</i> | miR-369-5p         | 1 |
| <i>circMLIP</i> | miR-371a-3p        | 1 |
| <i>circMLIP</i> | miR-371b-3p        | 1 |
| <i>circMLIP</i> | miR-374a-3p        | 2 |
| <i>circMLIP</i> | miR-3908           | 1 |
| <i>circMLIP</i> | miR-3942-5p        | 1 |
| <i>circMLIP</i> | miR-3944-5p        | 2 |
| <i>circMLIP</i> | miR-3976           | 3 |
| <i>circMLIP</i> | miR-4260           | 1 |
| <i>circMLIP</i> | miR-4263           | 3 |
| <i>circMLIP</i> | miR-4266           | 2 |
| <i>circMLIP</i> | miR-4267           | 2 |
| <i>circMLIP</i> | miR-4297/5581-5p   | 1 |
| <i>circMLIP</i> | miR-4299           | 2 |
| <i>circMLIP</i> | miR-431-5p         | 3 |
| <i>circMLIP</i> | miR-4312           | 1 |
| <i>circMLIP</i> | miR-4318           | 2 |
| <i>circMLIP</i> | miR-432-5p         | 4 |
| <i>circMLIP</i> | miR-4324           | 1 |
| <i>circMLIP</i> | miR-4328           | 3 |
| <i>circMLIP</i> | miR-4422           | 4 |
| <i>circMLIP</i> | miR-4428           | 2 |
| <i>circMLIP</i> | miR-4433b-3p       | 2 |
| <i>circMLIP</i> | miR-4434/4516/5703 | 4 |
| <i>circMLIP</i> | miR-4436b-5p       | 1 |
| <i>circMLIP</i> | miR-4453/4538      | 2 |
| <i>circMLIP</i> | miR-4456           | 2 |
| <i>circMLIP</i> | miR-4473           | 2 |
| <i>circMLIP</i> | miR-448            | 2 |
| <i>circMLIP</i> | miR-4487           | 1 |
| <i>circMLIP</i> | miR-4496           | 5 |
| <i>circMLIP</i> | miR-4505/5787      | 1 |
| <i>circMLIP</i> | miR-450a-2-3p      | 1 |
| <i>circMLIP</i> | miR-452-3p         | 2 |
| <i>circMLIP</i> | miR-4524a-3p       | 3 |
| <i>circMLIP</i> | miR-4531           | 3 |

|                 |                                      |   |
|-----------------|--------------------------------------|---|
| <i>circMLIP</i> | miR-4635                             | 4 |
| <i>circMLIP</i> | miR-4646-3p                          | 2 |
| <i>circMLIP</i> | miR-4652-3p                          | 2 |
| <i>circMLIP</i> | miR-4652-5p                          | 1 |
| <i>circMLIP</i> | miR-4653-3p                          | 1 |
| <i>circMLIP</i> | miR-4671-3p                          | 2 |
| <i>circMLIP</i> | miR-4722-5p                          | 5 |
| <i>circMLIP</i> | miR-4743-3p                          | 2 |
| <i>circMLIP</i> | miR-4772-3p                          | 2 |
| <i>circMLIP</i> | miR-4797-5p                          | 3 |
| <i>circMLIP</i> | miR-486-5p                           | 2 |
| <i>circMLIP</i> | miR-492                              | 1 |
| <i>circMLIP</i> | miR-499a-5p                          | 1 |
| <i>circMLIP</i> | miR-5002-5p                          | 3 |
| <i>circMLIP</i> | miR-5008-3p/6737-3p/7157-3p          | 1 |
| <i>circMLIP</i> | miR-500a-5p                          | 4 |
| <i>circMLIP</i> | miR-502-5p                           | 1 |
| <i>circMLIP</i> | miR-511-3p                           | 3 |
| <i>circMLIP</i> | miR-511-5p                           | 3 |
| <i>circMLIP</i> | miR-513b-3p                          | 1 |
| <i>circMLIP</i> | miR-516a-5p                          | 1 |
| <i>circMLIP</i> | miR-518a-5p/527                      | 1 |
| <i>circMLIP</i> | miR-5197-3p                          | 4 |
| <i>circMLIP</i> | miR-541-5p                           | 4 |
| <i>circMLIP</i> | miR-544b                             | 1 |
| <i>circMLIP</i> | miR-548aj-5p/548f-5p/548g-5p/548x-5p | 1 |
| <i>circMLIP</i> | miR-548ao-3p                         | 1 |
| <i>circMLIP</i> | miR-548aw                            | 1 |
| <i>circMLIP</i> | miR-548e-5p                          | 3 |
| <i>circMLIP</i> | miR-548q                             | 2 |
| <i>circMLIP</i> | miR-550a-3-5p/550a-5p/1271-3p        | 1 |
| <i>circMLIP</i> | miR-5572                             | 1 |
| <i>circMLIP</i> | miR-5579-3p                          | 1 |
| <i>circMLIP</i> | miR-5579-5p                          | 1 |
| <i>circMLIP</i> | miR-558                              | 1 |
| <i>circMLIP</i> | miR-5682                             | 1 |
| <i>circMLIP</i> | miR-5691                             | 2 |
| <i>circMLIP</i> | miR-5700                             | 2 |

|                 |             |   |
|-----------------|-------------|---|
| <i>circMLIP</i> | miR-571     | 1 |
| <i>circMLIP</i> | miR-576-5p  | 3 |
| <i>circMLIP</i> | miR-584-3p  | 4 |
| <i>circMLIP</i> | miR-585-5p  | 1 |
| <i>circMLIP</i> | miR-586     | 3 |
| <i>circMLIP</i> | miR-589-3p  | 2 |
| <i>circMLIP</i> | miR-597-3p  | 1 |
| <i>circMLIP</i> | miR-597-5p  | 2 |
| <i>circMLIP</i> | miR-6077    | 2 |
| <i>circMLIP</i> | miR-6079    | 4 |
| <i>circMLIP</i> | miR-6080    | 1 |
| <i>circMLIP</i> | miR-6124    | 4 |
| <i>circMLIP</i> | miR-6126    | 3 |
| <i>circMLIP</i> | miR-6131    | 1 |
| <i>circMLIP</i> | miR-622     | 2 |
| <i>circMLIP</i> | miR-624-3p  | 2 |
| <i>circMLIP</i> | miR-634     | 2 |
| <i>circMLIP</i> | miR-643     | 1 |
| <i>circMLIP</i> | miR-647     | 1 |
| <i>circMLIP</i> | miR-6501-3p | 3 |
| <i>circMLIP</i> | miR-6507-5p | 2 |
| <i>circMLIP</i> | miR-6509-3p | 1 |
| <i>circMLIP</i> | miR-651-3p  | 4 |
| <i>circMLIP</i> | miR-6511-5p | 1 |
| <i>circMLIP</i> | miR-6514-3p | 1 |
| <i>circMLIP</i> | miR-6515-3p | 5 |
| <i>circMLIP</i> | miR-654-3p  | 1 |
| <i>circMLIP</i> | miR-659-3p  | 3 |
| <i>circMLIP</i> | miR-659-5p  | 1 |
| <i>circMLIP</i> | miR-6755-3p | 2 |
| <i>circMLIP</i> | miR-6757-5p | 4 |
| <i>circMLIP</i> | miR-6759-3p | 2 |
| <i>circMLIP</i> | miR-676-3p  | 3 |
| <i>circMLIP</i> | miR-676-5p  | 3 |
| <i>circMLIP</i> | miR-6810-5p | 1 |
| <i>circMLIP</i> | miR-6813-3p | 2 |
| <i>circMLIP</i> | miR-6830-3p | 4 |
| <i>circMLIP</i> | miR-6830-5p | 4 |



|                 |                     |   |
|-----------------|---------------------|---|
| <i>circMLIP</i> | miR-6842-3p         | 1 |
| <i>circMLIP</i> | miR-6844            | 3 |
| <i>circMLIP</i> | miR-6853-3p         | 5 |
| <i>circMLIP</i> | miR-6857-5p         | 1 |
| <i>circMLIP</i> | miR-6861-3p         | 1 |
| <i>circMLIP</i> | miR-6864-5p         | 3 |
| <i>circMLIP</i> | miR-6882-3p         | 1 |
| <i>circMLIP</i> | miR-6885-3p         | 5 |
| <i>circMLIP</i> | miR-6888-5p         | 4 |
| <i>circMLIP</i> | miR-6889-3p         | 1 |
| <i>circMLIP</i> | miR-6894-3p         | 1 |
| <i>circMLIP</i> | miR-7-5p            | 2 |
| <i>circMLIP</i> | miR-7109-3p         | 3 |
| <i>circMLIP</i> | miR-767-3p          | 1 |
| <i>circMLIP</i> | miR-7978            | 2 |
| <i>circMLIP</i> | miR-8065            | 4 |
| <i>circMLIP</i> | miR-8066            | 3 |
| <i>circMLIP</i> | miR-8068            | 2 |
| <i>circMLIP</i> | miR-873-5p.1        | 5 |
| <i>circMLIP</i> | miR-873-5p.2        | 5 |
| <i>circMLIP</i> | miR-876-3p          | 1 |
| <i>circMLIP</i> | miR-892a            | 2 |
| <i>circMLIP</i> | miR-9-5p            | 2 |
| <i>circMLIP</i> | miR-943             | 3 |
| <i>circMLIP</i> | miR-1183            | 1 |
| <i>circMLIP</i> | miR-1224-5p         | 3 |
| <i>circMLIP</i> | miR-1279            | 2 |
| <i>circMLIP</i> | miR-1294            | 1 |
| <i>circMLIP</i> | miR-185-5p          | 2 |
| <i>circMLIP</i> | miR-20b-3p          | 1 |
| <i>circMLIP</i> | miR-3137            | 1 |
| <i>circMLIP</i> | miR-3150b-3p        | 5 |
| <i>circMLIP</i> | miR-345-5p          | 1 |
| <i>circMLIP</i> | miR-3680-3p         | 1 |
| <i>circMLIP</i> | miR-3915            | 3 |
| <i>circMLIP</i> | miR-4316            | 1 |
| <i>circMLIP</i> | miR-4330            | 2 |
| <i>circMLIP</i> | miR-4426/4647/4662b | 2 |

|                 |                  |   |
|-----------------|------------------|---|
| <i>circMLIP</i> | miR-450b-5p      | 1 |
| <i>circMLIP</i> | miR-4522         | 1 |
| <i>circMLIP</i> | miR-4689/6858-5p | 3 |
| <i>circMLIP</i> | miR-4693-5p      | 2 |
| <i>circMLIP</i> | miR-4699-5p      | 1 |
| <i>circMLIP</i> | miR-4710         | 2 |
| <i>circMLIP</i> | miR-4792         | 2 |
| <i>circMLIP</i> | miR-507/557      | 1 |
| <i>circMLIP</i> | miR-5100         | 1 |
| <i>circMLIP</i> | miR-5186         | 3 |
| <i>circMLIP</i> | miR-5192         | 2 |
| <i>circMLIP</i> | miR-7855-5p      | 5 |
| <i>circMLIP</i> | miR-8069         | 2 |
| <i>circMLIP</i> | miR-1228-5p      | 2 |
| <i>circMLIP</i> | miR-1238-3p      | 4 |
| <i>circMLIP</i> | miR-1276         | 3 |
| <i>circMLIP</i> | miR-1290         | 3 |
| <i>circMLIP</i> | miR-1299         | 3 |
| <i>circMLIP</i> | miR-130b-5p      | 6 |
| <i>circMLIP</i> | miR-141-5p       | 4 |
| <i>circMLIP</i> | miR-151-3p       | 2 |
| <i>circMLIP</i> | miR-185-3p       | 4 |
| <i>circMLIP</i> | miR-1911-3p      | 2 |
| <i>circMLIP</i> | miR-222-5p       | 4 |
| <i>circMLIP</i> | miR-2681-5p      | 6 |
| <i>circMLIP</i> | miR-296-3p       | 3 |
| <i>circMLIP</i> | miR-29b-1-5p     | 2 |
| <i>circMLIP</i> | miR-3145-5p      | 5 |
| <i>circMLIP</i> | miR-3147         | 2 |
| <i>circMLIP</i> | miR-335-3p       | 6 |
| <i>circMLIP</i> | miR-3691-3p      | 3 |
| <i>circMLIP</i> | miR-376-3p       | 2 |
| <i>circMLIP</i> | miR-378g         | 2 |
| <i>circMLIP</i> | miR-378j/6839-5p | 2 |
| <i>circMLIP</i> | miR-3925-3p      | 3 |
| <i>circMLIP</i> | miR-3940-5p/4507 | 3 |
| <i>circMLIP</i> | miR-3942-3p      | 1 |
| <i>circMLIP</i> | miR-431-3p       | 1 |

|                 |                                      |   |
|-----------------|--------------------------------------|---|
| <i>circMLIP</i> | miR-4311                             | 3 |
| <i>circMLIP</i> | miR-4425                             | 2 |
| <i>circMLIP</i> | miR-4474-5p                          | 3 |
| <i>circMLIP</i> | miR-4486                             | 2 |
| <i>circMLIP</i> | miR-4645-5p/4673                     | 2 |
| <i>circMLIP</i> | miR-4649-5p/6729-5p                  | 2 |
| <i>circMLIP</i> | miR-4691-5p/6792-3p                  | 2 |
| <i>circMLIP</i> | miR-4699-3p                          | 2 |
| <i>circMLIP</i> | miR-4724-5p                          | 3 |
| <i>circMLIP</i> | miR-4766-5p                          | 3 |
| <i>circMLIP</i> | miR-4778-5p                          | 3 |
| <i>circMLIP</i> | miR-4782-5p/5706                     | 3 |
| <i>circMLIP</i> | miR-484/3155                         | 4 |
| <i>circMLIP</i> | miR-488-3p                           | 3 |
| <i>circMLIP</i> | miR-508-5p                           | 5 |
| <i>circMLIP</i> | miR-5095/7151-3p                     | 3 |
| <i>circMLIP</i> | miR-516b-5p                          | 3 |
| <i>circMLIP</i> | miR-5193                             | 2 |
| <i>circMLIP</i> | miR-545-5p                           | 4 |
| <i>circMLIP</i> | miR-552-3p                           | 2 |
| <i>circMLIP</i> | miR-5681a                            | 2 |
| <i>circMLIP</i> | miR-5697                             | 3 |
| <i>circMLIP</i> | miR-583                              | 3 |
| <i>circMLIP</i> | miR-6074                             | 3 |
| <i>circMLIP</i> | miR-612/1285-3p/3187-5p/5189-5p/6860 | 2 |
| <i>circMLIP</i> | miR-617                              | 2 |
| <i>circMLIP</i> | miR-639                              | 1 |
| <i>circMLIP</i> | miR-6505-3p                          | 2 |
| <i>circMLIP</i> | miR-660-3p                           | 2 |
| <i>circMLIP</i> | miR-670-3p                           | 4 |
| <i>circMLIP</i> | miR-6730-5p                          | 2 |
| <i>circMLIP</i> | miR-6749-3p                          | 2 |
| <i>circMLIP</i> | miR-6780a-3p                         | 5 |
| <i>circMLIP</i> | miR-6839-3p                          | 3 |
| <i>circMLIP</i> | miR-6881-3p                          | 5 |
| <i>circMLIP</i> | miR-7111-3p                          | 5 |
| <i>circMLIP</i> | miR-766-3p                           | 3 |
| <i>circMLIP</i> | miR-802                              | 4 |

|                 |                                       |   |
|-----------------|---------------------------------------|---|
| <i>circMLIP</i> | miR-876-5p                            | 3 |
| <i>circMLIP</i> | miR-889-3p                            | 5 |
| <i>circMLIP</i> | miR-92a-1-5p                          | 4 |
| <i>circMLIP</i> | let-7-5p/98-5p                        | 1 |
| <i>circMLIP</i> | let-7a-2-3p/let-7g-3p                 | 2 |
| <i>circMLIP</i> | let-7a-3p/let-7b-3p/let-7f-1-3p/98-3p | 4 |
| <i>circMLIP</i> | let-7c-3p                             | 2 |
| <i>circMLIP</i> | let-7f-2-3p/1185-3p                   | 4 |
| <i>circMLIP</i> | miR-1-3p/206                          | 1 |
| <i>circMLIP</i> | miR-1-5p                              | 1 |
| <i>circMLIP</i> | miR-10-5p                             | 1 |
| <i>circMLIP</i> | miR-101-3p.1                          | 2 |
| <i>circMLIP</i> | miR-101-3p.2                          | 3 |
| <i>circMLIP</i> | miR-101-5p                            | 2 |
| <i>circMLIP</i> | miR-103-3p/107                        | 4 |
| <i>circMLIP</i> | miR-103a-2-5p                         | 1 |
| <i>circMLIP</i> | miR-103b                              | 1 |
| <i>circMLIP</i> | miR-106a-3p                           | 2 |
| <i>circMLIP</i> | miR-1178-3p                           | 1 |
| <i>circMLIP</i> | miR-1178-5p                           | 2 |
| <i>circMLIP</i> | miR-1179                              | 2 |
| <i>circMLIP</i> | miR-1182                              | 2 |
| <i>circMLIP</i> | miR-1185-5p                           | 2 |
| <i>circMLIP</i> | miR-1193                              | 1 |
| <i>circMLIP</i> | miR-1197                              | 2 |
| <i>circMLIP</i> | miR-1200                              | 1 |
| <i>circMLIP</i> | miR-1202/3972                         | 1 |
| <i>circMLIP</i> | miR-1207-5p/4763-3p                   | 2 |
| <i>circMLIP</i> | miR-122-3p                            | 1 |
| <i>circMLIP</i> | miR-122-5p                            | 1 |
| <i>circMLIP</i> | miR-1224-3p                           | 1 |
| <i>circMLIP</i> | miR-1225-3p                           | 3 |
| <i>circMLIP</i> | miR-1226-5p                           | 1 |
| <i>circMLIP</i> | miR-1227-5p                           | 1 |
| <i>circMLIP</i> | miR-1229-3p                           | 1 |
| <i>circMLIP</i> | miR-1231                              | 3 |
| <i>circMLIP</i> | miR-1233-3p                           | 2 |
| <i>circMLIP</i> | miR-124-5p                            | 1 |

|                 |                     |   |
|-----------------|---------------------|---|
| <i>circMLIP</i> | miR-1243            | 1 |
| <i>circMLIP</i> | miR-1244            | 1 |
| <i>circMLIP</i> | miR-1245a/8079      | 1 |
| <i>circMLIP</i> | miR-1245b-3p        | 2 |
| <i>circMLIP</i> | miR-1246            | 3 |
| <i>circMLIP</i> | miR-1249-5p/6797-5p | 3 |
| <i>circMLIP</i> | miR-1250-3p         | 7 |
| <i>circMLIP</i> | miR-1251-5p         | 1 |
| <i>circMLIP</i> | miR-1252-3p         | 5 |
| <i>circMLIP</i> | miR-1253            | 1 |
| <i>circMLIP</i> | miR-1254/3116       | 1 |
| <i>circMLIP</i> | miR-1256            | 3 |
| <i>circMLIP</i> | miR-1257            | 1 |
| <i>circMLIP</i> | miR-126-5p          | 3 |
| <i>circMLIP</i> | miR-1260a/1260b     | 1 |
| <i>circMLIP</i> | miR-1261            | 2 |
| <i>circMLIP</i> | miR-1263            | 1 |
| <i>circMLIP</i> | miR-1264            | 1 |
| <i>circMLIP</i> | miR-1265            | 3 |
| <i>circMLIP</i> | miR-1266-3p         | 3 |
| <i>circMLIP</i> | miR-1266-5p/4518    | 1 |
| <i>circMLIP</i> | miR-1267            | 1 |
| <i>circMLIP</i> | miR-1269            | 1 |
| <i>circMLIP</i> | miR-127-5p          | 1 |
| <i>circMLIP</i> | miR-1272            | 1 |
| <i>circMLIP</i> | miR-1273f           | 2 |
| <i>circMLIP</i> | miR-1277-5p         | 5 |
| <i>circMLIP</i> | miR-128-3p          | 1 |
| <i>circMLIP</i> | miR-1283            | 3 |
| <i>circMLIP</i> | miR-1285-5p         | 1 |
| <i>circMLIP</i> | miR-1288-3p         | 3 |
| <i>circMLIP</i> | miR-1289            | 1 |
| <i>circMLIP</i> | miR-129-3p          | 1 |
| <i>circMLIP</i> | miR-129-5p          | 6 |
| <i>circMLIP</i> | miR-1295b-3p        | 1 |
| <i>circMLIP</i> | miR-1298-5p         | 3 |
| <i>circMLIP</i> | miR-1301-3p         | 4 |
| <i>circMLIP</i> | miR-1301-5p/6502-5p | 1 |

|                 |                                      |   |
|-----------------|--------------------------------------|---|
| <i>circMLIP</i> | miR-1303                             | 2 |
| <i>circMLIP</i> | miR-1304-3p                          | 1 |
| <i>circMLIP</i> | miR-1304-5p                          | 2 |
| <i>circMLIP</i> | miR-1305                             | 4 |
| <i>circMLIP</i> | miR-1306-5p                          | 1 |
| <i>circMLIP</i> | miR-132-3p/212-3p                    | 2 |
| <i>circMLIP</i> | miR-1322                             | 1 |
| <i>circMLIP</i> | miR-1323                             | 2 |
| <i>circMLIP</i> | miR-1324                             | 4 |
| <i>circMLIP</i> | miR-134-5p                           | 4 |
| <i>circMLIP</i> | miR-1343-3p                          | 2 |
| <i>circMLIP</i> | miR-135a-3p                          | 1 |
| <i>circMLIP</i> | miR-136-3p                           | 1 |
| <i>circMLIP</i> | miR-136-5p                           | 3 |
| <i>circMLIP</i> | miR-137                              | 1 |
| <i>circMLIP</i> | miR-138-1-3p                         | 1 |
| <i>circMLIP</i> | miR-138-2-3p                         | 1 |
| <i>circMLIP</i> | miR-139-5p                           | 3 |
| <i>circMLIP</i> | miR-140-3p.1                         | 2 |
| <i>circMLIP</i> | miR-141-3p/200-3p                    | 3 |
| <i>circMLIP</i> | miR-142-3p.2                         | 1 |
| <i>circMLIP</i> | miR-142-5p                           | 1 |
| <i>circMLIP</i> | miR-143-3p                           | 2 |
| <i>circMLIP</i> | miR-143-5p                           | 4 |
| <i>circMLIP</i> | miR-144-3p                           | 2 |
| <i>circMLIP</i> | miR-145-3p                           | 1 |
| <i>circMLIP</i> | miR-1468-5p                          | 1 |
| <i>circMLIP</i> | miR-148a-5p                          | 2 |
| <i>circMLIP</i> | miR-148b-5p/6874-3p                  | 1 |
| <i>circMLIP</i> | miR-149-3p/4728-5p/6785-5p/6883-5p   | 2 |
| <i>circMLIP</i> | miR-15-5p/16-5p/195-5p/424-5p/497-5p | 1 |
| <i>circMLIP</i> | miR-150-3p                           | 1 |
| <i>circMLIP</i> | miR-150-5p                           | 1 |
| <i>circMLIP</i> | miR-1537-3p                          | 1 |
| <i>circMLIP</i> | miR-154-3p/487-3p                    | 2 |
| <i>circMLIP</i> | miR-16-1-3p                          | 2 |
| <i>circMLIP</i> | miR-16-2-3p/195-3p                   | 3 |
| <i>circMLIP</i> | miR-17-5p/20-5p/93-5p/106-5p/519-3p  | 1 |

|                 |                      |   |
|-----------------|----------------------|---|
| <i>circMLIP</i> | miR-181-5p           | 1 |
| <i>circMLIP</i> | miR-1827             | 1 |
| <i>circMLIP</i> | miR-183-3p           | 2 |
| <i>circMLIP</i> | miR-183-5p.1         | 4 |
| <i>circMLIP</i> | miR-186-5p           | 8 |
| <i>circMLIP</i> | miR-187-3p           | 1 |
| <i>circMLIP</i> | miR-187-5p           | 1 |
| <i>circMLIP</i> | miR-188-3p           | 1 |
| <i>circMLIP</i> | miR-18b-3p           | 1 |
| <i>circMLIP</i> | miR-190-5p           | 1 |
| <i>circMLIP</i> | miR-190a-3p          | 1 |
| <i>circMLIP</i> | miR-1910-3p/6511a-5p | 1 |
| <i>circMLIP</i> | miR-1911-5p          | 2 |
| <i>circMLIP</i> | miR-1914-5p          | 1 |
| <i>circMLIP</i> | miR-1915-5p          | 1 |
| <i>circMLIP</i> | miR-192-3p           | 1 |
| <i>circMLIP</i> | miR-193a-5p          | 1 |
| <i>circMLIP</i> | miR-194-5p           | 2 |
| <i>circMLIP</i> | miR-196a-3p          | 1 |
| <i>circMLIP</i> | miR-196b-3p          | 2 |
| <i>circMLIP</i> | miR-197-5p/3132      | 1 |
| <i>circMLIP</i> | miR-1976             | 1 |
| <i>circMLIP</i> | miR-199-3p           | 2 |
| <i>circMLIP</i> | miR-200-3p/429       | 3 |
| <i>circMLIP</i> | miR-200c-5p/550a-3p  | 1 |
| <i>circMLIP</i> | miR-202-3p           | 1 |
| <i>circMLIP</i> | miR-203a-3p.1        | 5 |
| <i>circMLIP</i> | miR-203b-3p          | 2 |
| <i>circMLIP</i> | miR-203b-5p/6718-5p  | 1 |
| <i>circMLIP</i> | miR-205-3p           | 3 |
| <i>circMLIP</i> | miR-2053             | 1 |
| <i>circMLIP</i> | miR-2054             | 1 |
| <i>circMLIP</i> | miR-208-5p           | 1 |
| <i>circMLIP</i> | miR-21-3p/3591-3p    | 1 |
| <i>circMLIP</i> | miR-2113             | 2 |
| <i>circMLIP</i> | miR-2114-3p          | 1 |
| <i>circMLIP</i> | miR-2116-3p          | 1 |
| <i>circMLIP</i> | miR-2116-5p          | 1 |

|                 |                                              |   |
|-----------------|----------------------------------------------|---|
| <i>circMLIP</i> | miR-214-3p/3619-5p                           | 4 |
| <i>circMLIP</i> | miR-214-5p                                   | 2 |
| <i>circMLIP</i> | miR-217                                      | 1 |
| <i>circMLIP</i> | miR-219-5p                                   | 1 |
| <i>circMLIP</i> | miR-219a-2-3p                                | 1 |
| <i>circMLIP</i> | miR-219b-3p                                  | 1 |
| <i>circMLIP</i> | miR-22-5p                                    | 1 |
| <i>circMLIP</i> | miR-221-3p/222-3p                            | 2 |
| <i>circMLIP</i> | miR-221-5p/8073                              | 2 |
| <i>circMLIP</i> | miR-224-5p                                   | 3 |
| <i>circMLIP</i> | miR-2276-5p                                  | 1 |
| <i>circMLIP</i> | miR-2277-3p                                  | 2 |
| <i>circMLIP</i> | miR-23-3p                                    | 1 |
| <i>circMLIP</i> | miR-23-5p                                    | 2 |
| <i>circMLIP</i> | miR-2392                                     | 3 |
| <i>circMLIP</i> | miR-2467-3p                                  | 1 |
| <i>circMLIP</i> | miR-25-3p/32-5p/92-3p/363-3p/367-3p          | 2 |
| <i>circMLIP</i> | miR-25-5p                                    | 1 |
| <i>circMLIP</i> | miR-26-3p                                    | 1 |
| <i>circMLIP</i> | miR-2681-3p                                  | 1 |
| <i>circMLIP</i> | miR-27-3p                                    | 2 |
| <i>circMLIP</i> | miR-27b-5p                                   | 1 |
| <i>circMLIP</i> | miR-28-5p/708-5p                             | 3 |
| <i>circMLIP</i> | miR-297                                      | 1 |
| <i>circMLIP</i> | miR-299-3p                                   | 1 |
| <i>circMLIP</i> | miR-29a-5p                                   | 3 |
| <i>circMLIP</i> | miR-302a-5p                                  | 4 |
| <i>circMLIP</i> | miR-302b-5p/302d-5p                          | 1 |
| <i>circMLIP</i> | miR-302c-3p.2/520-3p                         | 1 |
| <i>circMLIP</i> | miR-302c-5p                                  | 1 |
| <i>circMLIP</i> | miR-302f                                     | 1 |
| <i>circMLIP</i> | miR-3064-3p                                  | 2 |
| <i>circMLIP</i> | miR-3074-5p                                  | 1 |
| <i>circMLIP</i> | miR-30b-3p/1273h-5p/3689-3p/6779-5p/6780a-5p | 2 |
| <i>circMLIP</i> | miR-30c-3p/6788-5p                           | 2 |
| <i>circMLIP</i> | miR-31-5p                                    | 1 |
| <i>circMLIP</i> | miR-3115                                     | 1 |
| <i>circMLIP</i> | miR-3119                                     | 1 |



|                 |                          |   |
|-----------------|--------------------------|---|
| <i>circMLIP</i> | miR-3120-3p              | 3 |
| <i>circMLIP</i> | miR-3120-5p              | 4 |
| <i>circMLIP</i> | miR-3121-5p              | 3 |
| <i>circMLIP</i> | miR-3122/3913-5p         | 2 |
| <i>circMLIP</i> | miR-3123                 | 1 |
| <i>circMLIP</i> | miR-3124-3p              | 2 |
| <i>circMLIP</i> | miR-3125/3916/6859-5p    | 2 |
| <i>circMLIP</i> | miR-3126-5p              | 3 |
| <i>circMLIP</i> | miR-3127-3p/6756-3p      | 1 |
| <i>circMLIP</i> | miR-3128                 | 1 |
| <i>circMLIP</i> | miR-3129-3p/5583-5p      | 1 |
| <i>circMLIP</i> | miR-3130-3p              | 1 |
| <i>circMLIP</i> | miR-3133                 | 8 |
| <i>circMLIP</i> | miR-3134                 | 5 |
| <i>circMLIP</i> | miR-3135a                | 1 |
| <i>circMLIP</i> | miR-3136-3p/7155-3p      | 1 |
| <i>circMLIP</i> | miR-3140-3p              | 2 |
| <i>circMLIP</i> | miR-3143                 | 3 |
| <i>circMLIP</i> | miR-3150a-5p/3150b-5p    | 2 |
| <i>circMLIP</i> | miR-3152-3p              | 2 |
| <i>circMLIP</i> | miR-3153/6733-5p/6739-5p | 1 |
| <i>circMLIP</i> | miR-3154                 | 1 |
| <i>circMLIP</i> | miR-3156-3p              | 1 |
| <i>circMLIP</i> | miR-3157-3p              | 1 |
| <i>circMLIP</i> | miR-3157-5p              | 1 |
| <i>circMLIP</i> | miR-3160-5p              | 1 |
| <i>circMLIP</i> | miR-3161                 | 2 |
| <i>circMLIP</i> | miR-3162-3p              | 1 |
| <i>circMLIP</i> | miR-3163                 | 7 |
| <i>circMLIP</i> | miR-3164                 | 4 |
| <i>circMLIP</i> | miR-3166                 | 1 |
| <i>circMLIP</i> | miR-3168                 | 1 |
| <i>circMLIP</i> | miR-3169                 | 2 |
| <i>circMLIP</i> | miR-3171                 | 1 |
| <i>circMLIP</i> | miR-3174                 | 3 |
| <i>circMLIP</i> | miR-3176/3922-3p         | 1 |
| <i>circMLIP</i> | miR-3179                 | 2 |
| <i>circMLIP</i> | miR-3184-3p              | 1 |

|                 |                           |   |
|-----------------|---------------------------|---|
| <i>circMLIP</i> | miR-3189-5p               | 1 |
| <i>circMLIP</i> | miR-3190-3p               | 1 |
| <i>circMLIP</i> | miR-3190-5p               | 1 |
| <i>circMLIP</i> | miR-3192-3p               | 5 |
| <i>circMLIP</i> | miR-3193                  | 2 |
| <i>circMLIP</i> | miR-3194-3p               | 1 |
| <i>circMLIP</i> | miR-3197                  | 1 |
| <i>circMLIP</i> | miR-3199/8052             | 2 |
| <i>circMLIP</i> | miR-32-3p                 | 1 |
| <i>circMLIP</i> | miR-3200-5p               | 4 |
| <i>circMLIP</i> | miR-320e                  | 1 |
| <i>circMLIP</i> | miR-323-3p                | 1 |
| <i>circMLIP</i> | miR-323b-3p               | 3 |
| <i>circMLIP</i> | miR-323b-5p/410-5p/494-5p | 1 |
| <i>circMLIP</i> | miR-325                   | 1 |
| <i>circMLIP</i> | miR-328-3p                | 1 |
| <i>circMLIP</i> | miR-329-3p/362-3p         | 3 |
| <i>circMLIP</i> | miR-329-5p                | 2 |
| <i>circMLIP</i> | miR-33-5p                 | 2 |
| <i>circMLIP</i> | miR-331-3p                | 1 |
| <i>circMLIP</i> | miR-331-5p                | 3 |
| <i>circMLIP</i> | miR-335-5p                | 2 |
| <i>circMLIP</i> | miR-338-5p                | 1 |
| <i>circMLIP</i> | miR-339-5p                | 2 |
| <i>circMLIP</i> | miR-33a-3p                | 2 |
| <i>circMLIP</i> | miR-340-5p                | 5 |
| <i>circMLIP</i> | miR-34a-3p                | 1 |
| <i>circMLIP</i> | miR-34b-3p                | 3 |
| <i>circMLIP</i> | miR-34b-5p/449c-5p        | 1 |
| <i>circMLIP</i> | miR-34c-3p                | 3 |
| <i>circMLIP</i> | miR-3529-3p               | 2 |
| <i>circMLIP</i> | miR-3591-5p               | 3 |
| <i>circMLIP</i> | miR-3605-5p               | 2 |
| <i>circMLIP</i> | miR-3606-5p               | 1 |
| <i>circMLIP</i> | miR-3607-5p               | 2 |
| <i>circMLIP</i> | miR-3611                  | 2 |
| <i>circMLIP</i> | miR-3613-3p               | 5 |
| <i>circMLIP</i> | miR-3614-5p               | 2 |

|                 |                     |   |
|-----------------|---------------------|---|
| <i>circMLIP</i> | miR-3617-3p         | 1 |
| <i>circMLIP</i> | miR-3619-3p         | 1 |
| <i>circMLIP</i> | miR-3620-3p         | 1 |
| <i>circMLIP</i> | miR-3622b-5p        | 2 |
| <i>circMLIP</i> | miR-3646            | 5 |
| <i>circMLIP</i> | miR-3650            | 1 |
| <i>circMLIP</i> | miR-3651            | 1 |
| <i>circMLIP</i> | miR-3653-5p         | 1 |
| <i>circMLIP</i> | miR-3654            | 1 |
| <i>circMLIP</i> | miR-3657            | 1 |
| <i>circMLIP</i> | miR-3658            | 1 |
| <i>circMLIP</i> | miR-365a-5p/365b-5p | 2 |
| <i>circMLIP</i> | miR-3660/4526       | 2 |
| <i>circMLIP</i> | miR-3662            | 3 |
| <i>circMLIP</i> | miR-3663-5p         | 1 |
| <i>circMLIP</i> | miR-3664-3p         | 1 |
| <i>circMLIP</i> | miR-367-5p          | 1 |
| <i>circMLIP</i> | miR-3671            | 2 |
| <i>circMLIP</i> | miR-3672/6864-3p    | 1 |
| <i>circMLIP</i> | miR-3675-3p         | 2 |
| <i>circMLIP</i> | miR-3681-5p         | 1 |
| <i>circMLIP</i> | miR-3682-3p         | 1 |
| <i>circMLIP</i> | miR-3682-5p         | 1 |
| <i>circMLIP</i> | miR-3688-3p         | 2 |
| <i>circMLIP</i> | miR-3688-5p         | 1 |
| <i>circMLIP</i> | miR-3689d/6851-5p   | 3 |
| <i>circMLIP</i> | miR-369-3p          | 2 |
| <i>circMLIP</i> | miR-3691-5p         | 2 |
| <i>circMLIP</i> | miR-3692-3p         | 1 |
| <i>circMLIP</i> | miR-370-3p          | 1 |
| <i>circMLIP</i> | miR-374-5p          | 1 |
| <i>circMLIP</i> | miR-374-5p/655-3p   | 2 |
| <i>circMLIP</i> | miR-374b-3p         | 6 |
| <i>circMLIP</i> | miR-374c-3p         | 3 |
| <i>circMLIP</i> | miR-375             | 3 |
| <i>circMLIP</i> | miR-376a-2-5p       | 1 |
| <i>circMLIP</i> | miR-376a-5p         | 1 |
| <i>circMLIP</i> | miR-376b-5p/376c-5p | 2 |

|                 |                       |   |
|-----------------|-----------------------|---|
| <i>circMLIP</i> | miR-376c-3p           | 3 |
| <i>circMLIP</i> | miR-377-5p/6086       | 2 |
| <i>circMLIP</i> | miR-378a-5p           | 1 |
| <i>circMLIP</i> | miR-379-5p            | 1 |
| <i>circMLIP</i> | miR-380-5p/563        | 1 |
| <i>circMLIP</i> | miR-381-3p            | 1 |
| <i>circMLIP</i> | miR-382-3p            | 3 |
| <i>circMLIP</i> | miR-383-5p.1          | 2 |
| <i>circMLIP</i> | miR-383-5p.2          | 1 |
| <i>circMLIP</i> | miR-3907              | 1 |
| <i>circMLIP</i> | miR-3909              | 2 |
| <i>circMLIP</i> | miR-3914              | 1 |
| <i>circMLIP</i> | miR-3920              | 2 |
| <i>circMLIP</i> | miR-3923              | 1 |
| <i>circMLIP</i> | miR-3925-5p           | 1 |
| <i>circMLIP</i> | miR-3928-5p/6806-3p   | 1 |
| <i>circMLIP</i> | miR-3937              | 1 |
| <i>circMLIP</i> | miR-3941              | 2 |
| <i>circMLIP</i> | miR-3943              | 1 |
| <i>circMLIP</i> | miR-3945              | 1 |
| <i>circMLIP</i> | miR-3977              | 1 |
| <i>circMLIP</i> | miR-3978              | 1 |
| <i>circMLIP</i> | miR-410-3p            | 4 |
| <i>circMLIP</i> | miR-411-5p.1          | 1 |
| <i>circMLIP</i> | miR-411-5p.2          | 1 |
| <i>circMLIP</i> | miR-412-3p/6754-3p    | 2 |
| <i>circMLIP</i> | miR-421               | 1 |
| <i>circMLIP</i> | miR-424-3p            | 1 |
| <i>circMLIP</i> | miR-4251              | 1 |
| <i>circMLIP</i> | miR-4253/6862-5p      | 1 |
| <i>circMLIP</i> | miR-4255              | 1 |
| <i>circMLIP</i> | miR-4256              | 1 |
| <i>circMLIP</i> | miR-4257              | 2 |
| <i>circMLIP</i> | miR-4259              | 1 |
| <i>circMLIP</i> | miR-4270/4441/6754-5p | 1 |
| <i>circMLIP</i> | miR-4272              | 1 |
| <i>circMLIP</i> | miR-4273/7156-5p      | 1 |
| <i>circMLIP</i> | miR-4274              | 4 |

|                 |                                              |    |
|-----------------|----------------------------------------------|----|
| <i>circMLIP</i> | miR-4275                                     | 2  |
| <i>circMLIP</i> | miR-4279                                     | 1  |
| <i>circMLIP</i> | miR-4280                                     | 1  |
| <i>circMLIP</i> | miR-4282                                     | 12 |
| <i>circMLIP</i> | miR-4291                                     | 2  |
| <i>circMLIP</i> | miR-4293                                     | 3  |
| <i>circMLIP</i> | miR-4294                                     | 1  |
| <i>circMLIP</i> | miR-4303                                     | 2  |
| <i>circMLIP</i> | miR-4304                                     | 2  |
| <i>circMLIP</i> | miR-4305                                     | 1  |
| <i>circMLIP</i> | miR-4307                                     | 5  |
| <i>circMLIP</i> | miR-4310/7157-5p                             | 4  |
| <i>circMLIP</i> | miR-4315                                     | 1  |
| <i>circMLIP</i> | miR-4317                                     | 2  |
| <i>circMLIP</i> | miR-432-3p                                   | 3  |
| <i>circMLIP</i> | miR-4320                                     | 1  |
| <i>circMLIP</i> | miR-4323                                     | 1  |
| <i>circMLIP</i> | miR-4326                                     | 1  |
| <i>circMLIP</i> | miR-4329                                     | 1  |
| <i>circMLIP</i> | miR-433-3p                                   | 1  |
| <i>circMLIP</i> | miR-4419a/4510/6127/6129/6130/6133           | 3  |
| <i>circMLIP</i> | miR-4421/5699-3p                             | 2  |
| <i>circMLIP</i> | miR-4423-5p                                  | 1  |
| <i>circMLIP</i> | miR-4433a-3p                                 | 3  |
| <i>circMLIP</i> | miR-4433b-5p                                 | 1  |
| <i>circMLIP</i> | miR-4436b-3p/4632-5p/6735-5p/6879-5p/7843-5p |    |
| <i>circMLIP</i> | miR-4438                                     | 2  |
| <i>circMLIP</i> | miR-4443                                     | 3  |
| <i>circMLIP</i> | miR-4445-5p                                  | 1  |
| <i>circMLIP</i> | miR-4446-5p                                  | 1  |
| <i>circMLIP</i> | miR-4451                                     | 1  |
| <i>circMLIP</i> | miR-4452                                     | 2  |
| <i>circMLIP</i> | miR-4455                                     | 1  |
| <i>circMLIP</i> | miR-4457                                     | 2  |
| <i>circMLIP</i> | miR-4459                                     | 3  |
| <i>circMLIP</i> | miR-4460                                     | 1  |
| <i>circMLIP</i> | miR-4461                                     | 1  |
| <i>circMLIP</i> | miR-4464/4748                                | 1  |

|                 |                     |   |
|-----------------|---------------------|---|
| <i>circMLIP</i> | miR-4468            | 2 |
| <i>circMLIP</i> | miR-4475            | 2 |
| <i>circMLIP</i> | miR-4476/6876-5p    | 2 |
| <i>circMLIP</i> | miR-4477a           | 2 |
| <i>circMLIP</i> | miR-4480            | 2 |
| <i>circMLIP</i> | miR-4481/4745-5p    | 1 |
| <i>circMLIP</i> | miR-4482-3p         | 3 |
| <i>circMLIP</i> | miR-4484            | 2 |
| <i>circMLIP</i> | miR-4491/4657       | 1 |
| <i>circMLIP</i> | miR-4501            | 1 |
| <i>circMLIP</i> | miR-4502            | 2 |
| <i>circMLIP</i> | miR-4509            | 2 |
| <i>circMLIP</i> | miR-450a-1-3p       | 2 |
| <i>circMLIP</i> | miR-4513/6855-3p    | 3 |
| <i>circMLIP</i> | miR-4515            | 3 |
| <i>circMLIP</i> | miR-4517            | 1 |
| <i>circMLIP</i> | miR-4519            | 4 |
| <i>circMLIP</i> | miR-452-5p/892-3p   | 4 |
| <i>circMLIP</i> | miR-4520-2-3p       | 1 |
| <i>circMLIP</i> | miR-4520-3p         | 1 |
| <i>circMLIP</i> | miR-4524-5p         | 4 |
| <i>circMLIP</i> | miR-4524b-3p        | 5 |
| <i>circMLIP</i> | miR-4527/6503-5p    | 1 |
| <i>circMLIP</i> | miR-4528            | 1 |
| <i>circMLIP</i> | miR-4529-3p         | 1 |
| <i>circMLIP</i> | miR-4534/8082       | 5 |
| <i>circMLIP</i> | miR-4536-5p         | 1 |
| <i>circMLIP</i> | miR-4537            | 1 |
| <i>circMLIP</i> | miR-455-3p.2        | 4 |
| <i>circMLIP</i> | miR-455-5p          | 1 |
| <i>circMLIP</i> | miR-4633-3p/6500-5p | 1 |
| <i>circMLIP</i> | miR-4633-5p         | 1 |
| <i>circMLIP</i> | miR-4639-3p         | 1 |
| <i>circMLIP</i> | miR-4639-5p         | 1 |
| <i>circMLIP</i> | miR-4641            | 1 |
| <i>circMLIP</i> | miR-4642            | 4 |
| <i>circMLIP</i> | miR-4643            | 3 |
| <i>circMLIP</i> | miR-4645-3p         | 1 |

|                 |                          |   |
|-----------------|--------------------------|---|
| <i>circMLIP</i> | miR-4649-3p              | 4 |
| <i>circMLIP</i> | miR-4650-3p              | 1 |
| <i>circMLIP</i> | miR-4659a-3p/4659b-3p    | 1 |
| <i>circMLIP</i> | miR-4659a-5p/4659b-5p    | 2 |
| <i>circMLIP</i> | miR-4661-5p              | 1 |
| <i>circMLIP</i> | miR-4662-5p              | 2 |
| <i>circMLIP</i> | miR-4662a-3p             | 2 |
| <i>circMLIP</i> | miR-4663                 | 3 |
| <i>circMLIP</i> | miR-4666a-3p             | 1 |
| <i>circMLIP</i> | miR-4666b                | 1 |
| <i>circMLIP</i> | miR-4667-5p/4700-5p/8089 | 1 |
| <i>circMLIP</i> | miR-4668-3p              | 4 |
| <i>circMLIP</i> | miR-4668-5p              | 1 |
| <i>circMLIP</i> | miR-4669                 | 1 |
| <i>circMLIP</i> | miR-4670-3p              | 1 |
| <i>circMLIP</i> | miR-4670-5p              | 1 |
| <i>circMLIP</i> | miR-4671-5p              | 1 |
| <i>circMLIP</i> | miR-4672                 | 2 |
| <i>circMLIP</i> | miR-4677-5p              | 1 |
| <i>circMLIP</i> | miR-4678                 | 1 |
| <i>circMLIP</i> | miR-4680-5p              | 1 |
| <i>circMLIP</i> | miR-4682                 | 2 |
| <i>circMLIP</i> | miR-4684-3p              | 3 |
| <i>circMLIP</i> | miR-4684-5p              | 2 |
| <i>circMLIP</i> | miR-4685-5p/6837-5p      | 1 |
| <i>circMLIP</i> | miR-4687-5p              | 1 |
| <i>circMLIP</i> | miR-4690-5p              | 3 |
| <i>circMLIP</i> | miR-4694-3p              | 3 |
| <i>circMLIP</i> | miR-4694-5p              | 2 |
| <i>circMLIP</i> | miR-4695-3p              | 1 |
| <i>circMLIP</i> | miR-4695-5p              | 3 |
| <i>circMLIP</i> | miR-4696                 | 1 |
| <i>circMLIP</i> | miR-4698                 | 1 |
| <i>circMLIP</i> | miR-4700-3p              | 1 |
| <i>circMLIP</i> | miR-4703-3p              | 1 |
| <i>circMLIP</i> | miR-4704-3p              | 2 |
| <i>circMLIP</i> | miR-4704-5p              | 1 |
| <i>circMLIP</i> | miR-4705                 | 1 |

|                 |                             |   |
|-----------------|-----------------------------|---|
| <i>circMLIP</i> | miR-4708-5p                 | 2 |
| <i>circMLIP</i> | miR-4709-3p                 | 1 |
| <i>circMLIP</i> | miR-4709-5p                 | 1 |
| <i>circMLIP</i> | miR-4711-3p                 | 1 |
| <i>circMLIP</i> | miR-4711-5p                 | 1 |
| <i>circMLIP</i> | miR-4712-3p                 | 1 |
| <i>circMLIP</i> | miR-4713-3p                 | 1 |
| <i>circMLIP</i> | miR-4713-5p                 | 1 |
| <i>circMLIP</i> | miR-4714-3p                 | 1 |
| <i>circMLIP</i> | miR-4715-5p                 | 1 |
| <i>circMLIP</i> | miR-4716-5p                 | 2 |
| <i>circMLIP</i> | miR-4719                    | 3 |
| <i>circMLIP</i> | miR-4720-3p                 | 2 |
| <i>circMLIP</i> | miR-4720-5p/4799-3p/5588-5p | 1 |
| <i>circMLIP</i> | miR-4722-3p/6727-3p         | 1 |
| <i>circMLIP</i> | miR-4725-5p                 | 1 |
| <i>circMLIP</i> | miR-4727-3p                 | 1 |
| <i>circMLIP</i> | miR-4728-3p                 | 2 |
| <i>circMLIP</i> | miR-4729                    | 3 |
| <i>circMLIP</i> | miR-4733-5p                 | 1 |
| <i>circMLIP</i> | miR-4734                    | 1 |
| <i>circMLIP</i> | miR-4736                    | 2 |
| <i>circMLIP</i> | miR-4738-3p                 | 1 |
| <i>circMLIP</i> | miR-4738-5p                 | 1 |
| <i>circMLIP</i> | miR-4740-5p                 | 3 |
| <i>circMLIP</i> | miR-4743-5p                 | 1 |
| <i>circMLIP</i> | miR-4744                    | 2 |
| <i>circMLIP</i> | miR-4751                    | 1 |
| <i>circMLIP</i> | miR-4752                    | 3 |
| <i>circMLIP</i> | miR-4753-3p                 | 2 |
| <i>circMLIP</i> | miR-4755-3p                 | 2 |
| <i>circMLIP</i> | miR-4758-3p                 | 1 |
| <i>circMLIP</i> | miR-4759                    | 2 |
| <i>circMLIP</i> | miR-4760-3p                 | 1 |
| <i>circMLIP</i> | miR-4760-5p/8061            | 1 |
| <i>circMLIP</i> | miR-4761-3p                 | 1 |
| <i>circMLIP</i> | miR-4762-3p                 | 1 |
| <i>circMLIP</i> | miR-4762-5p                 | 2 |



|                 |                     |   |
|-----------------|---------------------|---|
| <i>circMLIP</i> | miR-4763-5p         | 1 |
| <i>circMLIP</i> | miR-4764-5p         | 2 |
| <i>circMLIP</i> | miR-4768-3p         | 3 |
| <i>circMLIP</i> | miR-4768-5p/6833-3p | 1 |
| <i>circMLIP</i> | miR-4769-3p/6817-5p | 1 |
| <i>circMLIP</i> | miR-4771            | 1 |
| <i>circMLIP</i> | miR-4772-5p         | 2 |
| <i>circMLIP</i> | miR-4773            | 1 |
| <i>circMLIP</i> | miR-4775            | 5 |
| <i>circMLIP</i> | miR-4776-3p         | 2 |
| <i>circMLIP</i> | miR-4777-5p         | 2 |
| <i>circMLIP</i> | miR-4778-3p         | 2 |
| <i>circMLIP</i> | miR-4779            | 3 |
| <i>circMLIP</i> | miR-4786-5p         | 1 |
| <i>circMLIP</i> | miR-4789-3p         | 3 |
| <i>circMLIP</i> | miR-4789-5p         | 4 |
| <i>circMLIP</i> | miR-4790-3p         | 1 |
| <i>circMLIP</i> | miR-4790-5p         | 1 |
| <i>circMLIP</i> | miR-4793-3p         | 1 |
| <i>circMLIP</i> | miR-4793-5p         | 2 |
| <i>circMLIP</i> | miR-4795-3p         | 3 |
| <i>circMLIP</i> | miR-4795-5p         | 3 |
| <i>circMLIP</i> | miR-4799-5p         | 4 |
| <i>circMLIP</i> | miR-4802-5p         | 4 |
| <i>circMLIP</i> | miR-4803            | 3 |
| <i>circMLIP</i> | miR-4804-3p         | 2 |
| <i>circMLIP</i> | miR-483-3p.2        | 2 |
| <i>circMLIP</i> | miR-486-3p          | 1 |
| <i>circMLIP</i> | miR-490-5p          | 2 |
| <i>circMLIP</i> | miR-491-3p          | 1 |
| <i>circMLIP</i> | miR-493-5p          | 2 |
| <i>circMLIP</i> | miR-494-3p          | 2 |
| <i>circMLIP</i> | miR-496.1           | 1 |
| <i>circMLIP</i> | miR-498             | 1 |
| <i>circMLIP</i> | miR-499a-3p/499b-3p | 4 |
| <i>circMLIP</i> | miR-5000-5p         | 1 |
| <i>circMLIP</i> | miR-5003-3p         | 3 |
| <i>circMLIP</i> | miR-5003-5p         | 1 |

|                 |                             |   |
|-----------------|-----------------------------|---|
| <i>circMLIP</i> | miR-5004-3p                 | 2 |
| <i>circMLIP</i> | miR-5004-5p                 | 1 |
| <i>circMLIP</i> | miR-5006-5p                 | 1 |
| <i>circMLIP</i> | miR-5009-5p/8058            | 1 |
| <i>circMLIP</i> | miR-5010-3p                 | 2 |
| <i>circMLIP</i> | miR-5011-3p                 | 1 |
| <i>circMLIP</i> | miR-5011-5p                 | 5 |
| <i>circMLIP</i> | miR-503-5p                  | 1 |
| <i>circMLIP</i> | miR-504-5p.1                | 1 |
| <i>circMLIP</i> | miR-505-3p.2                | 1 |
| <i>circMLIP</i> | miR-506-5p                  | 3 |
| <i>circMLIP</i> | miR-508-3p                  | 1 |
| <i>circMLIP</i> | miR-5087                    | 2 |
| <i>circMLIP</i> | miR-5089-3p                 | 1 |
| <i>circMLIP</i> | miR-509-3-5p/509-5p/4418    | 1 |
| <i>circMLIP</i> | miR-5093                    | 2 |
| <i>circMLIP</i> | miR-5096                    | 3 |
| <i>circMLIP</i> | miR-510-3p                  | 5 |
| <i>circMLIP</i> | miR-512-3p                  | 1 |
| <i>circMLIP</i> | miR-512-5p                  | 2 |
| <i>circMLIP</i> | miR-513a-3p/513c-3p/3606-3p | 5 |
| <i>circMLIP</i> | miR-513a-5p                 | 2 |
| <i>circMLIP</i> | miR-513b-5p                 | 5 |
| <i>circMLIP</i> | miR-517-5p                  | 1 |
| <i>circMLIP</i> | miR-5187-5p                 | 1 |
| <i>circMLIP</i> | miR-518d-5p/519-5p          | 2 |
| <i>circMLIP</i> | miR-5190                    | 5 |
| <i>circMLIP</i> | miR-5191                    | 3 |
| <i>circMLIP</i> | miR-5195-5p                 | 2 |
| <i>circMLIP</i> | miR-5196-3p                 | 2 |
| <i>circMLIP</i> | miR-5197-5p                 | 1 |
| <i>circMLIP</i> | miR-522-3p                  | 3 |
| <i>circMLIP</i> | miR-524-5p                  | 2 |
| <i>circMLIP</i> | miR-526b-5p                 | 2 |
| <i>circMLIP</i> | miR-532-3p                  | 1 |
| <i>circMLIP</i> | miR-539-3p                  | 1 |
| <i>circMLIP</i> | miR-539-5p                  | 1 |
| <i>circMLIP</i> | miR-543                     | 3 |

|                 |                                                                  |   |
|-----------------|------------------------------------------------------------------|---|
| <i>circMLIP</i> | miR-545-3p                                                       | 1 |
| <i>circMLIP</i> | miR-548ac/548bb-3p/548d-3p/548h-3p/548z                          |   |
| <i>circMLIP</i> | miR-548ad-3p                                                     | 1 |
| <i>circMLIP</i> | miR-548ah-5p/3609                                                | 1 |
| <i>circMLIP</i> | miR-548al/4445-3p                                                | 1 |
| <i>circMLIP</i> | miR-548an                                                        | 2 |
| <i>circMLIP</i> | miR-548ao-5p/548ax                                               | 3 |
| <i>circMLIP</i> | miR-548ap-3p/548aa/548t-3p                                       | 1 |
| <i>circMLIP</i> | miR-548aq-3p/548am-3p/548aj-3p/548ah-3p/548ae-3p/548j-3p/548x-3p |   |
| <i>circMLIP</i> | miR-548as-3p                                                     | 1 |
| <i>circMLIP</i> | miR-548av-3p                                                     | 1 |
| <i>circMLIP</i> | miR-548av-5p/548k/8054                                           | 1 |
| <i>circMLIP</i> | miR-548ay-3p/548at-3p                                            | 1 |
| <i>circMLIP</i> | miR-548ay-5p/548au-5p/548as-5p/548ar-5p/548aq-5p/548ap-5p/548am- |   |
| <i>circMLIP</i> | miR-548az-3p/548ar-3p/548a-3p/548e-3p/548f-3p                    |   |
| <i>circMLIP</i> | miR-548az-5p/548t-5p                                             | 1 |
| <i>circMLIP</i> | miR-548c-3p                                                      | 7 |
| <i>circMLIP</i> | miR-548g-3p                                                      | 5 |
| <i>circMLIP</i> | miR-548l                                                         | 1 |
| <i>circMLIP</i> | miR-548n                                                         | 1 |
| <i>circMLIP</i> | miR-548p                                                         | 1 |
| <i>circMLIP</i> | miR-548u/7161-5p                                                 | 1 |
| <i>circMLIP</i> | miR-548v                                                         | 2 |
| <i>circMLIP</i> | miR-549a                                                         | 1 |
| <i>circMLIP</i> | miR-550b-2-5p                                                    | 1 |
| <i>circMLIP</i> | miR-551-3p                                                       | 1 |
| <i>circMLIP</i> | miR-551b-5p                                                      | 8 |
| <i>circMLIP</i> | miR-552-5p                                                       | 2 |
| <i>circMLIP</i> | miR-556-5p                                                       | 1 |
| <i>circMLIP</i> | miR-5571-5p                                                      | 2 |
| <i>circMLIP</i> | miR-5580-3p                                                      | 3 |
| <i>circMLIP</i> | miR-5582-3p                                                      | 2 |
| <i>circMLIP</i> | miR-5583-3p                                                      | 1 |
| <i>circMLIP</i> | miR-5584-3p                                                      | 1 |
| <i>circMLIP</i> | miR-5584-5p                                                      | 1 |
| <i>circMLIP</i> | miR-5585-3p                                                      | 2 |
| <i>circMLIP</i> | miR-5585-5p                                                      | 3 |
| <i>circMLIP</i> | miR-5589-3p                                                      | 1 |

|                 |                  |   |
|-----------------|------------------|---|
| <i>circMLIP</i> | miR-5590-5p      | 2 |
| <i>circMLIP</i> | miR-561-5p       | 2 |
| <i>circMLIP</i> | miR-562          | 1 |
| <i>circMLIP</i> | miR-566          | 2 |
| <i>circMLIP</i> | miR-568          | 1 |
| <i>circMLIP</i> | miR-5680         | 3 |
| <i>circMLIP</i> | miR-5683         | 2 |
| <i>circMLIP</i> | miR-5684         | 1 |
| <i>circMLIP</i> | miR-5687         | 2 |
| <i>circMLIP</i> | miR-569          | 1 |
| <i>circMLIP</i> | miR-5690         | 1 |
| <i>circMLIP</i> | miR-5692a        | 2 |
| <i>circMLIP</i> | miR-5692bc       | 2 |
| <i>circMLIP</i> | miR-5694         | 1 |
| <i>circMLIP</i> | miR-5699-5p      | 1 |
| <i>circMLIP</i> | miR-5701         | 1 |
| <i>circMLIP</i> | miR-5705         | 1 |
| <i>circMLIP</i> | miR-573/3616-5p  | 3 |
| <i>circMLIP</i> | miR-575/4676-5p  | 2 |
| <i>circMLIP</i> | miR-577          | 1 |
| <i>circMLIP</i> | miR-578          | 3 |
| <i>circMLIP</i> | miR-580-3p       | 3 |
| <i>circMLIP</i> | miR-580-5p       | 4 |
| <i>circMLIP</i> | miR-581          | 2 |
| <i>circMLIP</i> | miR-582-5p       | 3 |
| <i>circMLIP</i> | miR-584-5p       | 1 |
| <i>circMLIP</i> | miR-587          | 4 |
| <i>circMLIP</i> | miR-590-3p       | 3 |
| <i>circMLIP</i> | miR-591          | 1 |
| <i>circMLIP</i> | miR-593-3p       | 1 |
| <i>circMLIP</i> | miR-595          | 2 |
| <i>circMLIP</i> | miR-596          | 3 |
| <i>circMLIP</i> | miR-600          | 3 |
| <i>circMLIP</i> | miR-603          | 3 |
| <i>circMLIP</i> | miR-605-5p       | 2 |
| <i>circMLIP</i> | miR-607          | 5 |
| <i>circMLIP</i> | miR-6071         | 1 |
| <i>circMLIP</i> | miR-6072/6891-3p | 2 |

|                 |                  |   |
|-----------------|------------------|---|
| <i>circMLIP</i> | miR-6078         | 1 |
| <i>circMLIP</i> | miR-6081         | 1 |
| <i>circMLIP</i> | miR-6083         | 1 |
| <i>circMLIP</i> | miR-6087         | 1 |
| <i>circMLIP</i> | miR-609          | 1 |
| <i>circMLIP</i> | miR-610          | 1 |
| <i>circMLIP</i> | miR-6134         | 1 |
| <i>circMLIP</i> | miR-6165         | 3 |
| <i>circMLIP</i> | miR-624-5p       | 1 |
| <i>circMLIP</i> | miR-626/6876-3p  | 2 |
| <i>circMLIP</i> | miR-628-3p       | 1 |
| <i>circMLIP</i> | miR-628-5p       | 2 |
| <i>circMLIP</i> | miR-629-3p       | 2 |
| <i>circMLIP</i> | miR-632/4288     | 3 |
| <i>circMLIP</i> | miR-633          | 1 |
| <i>circMLIP</i> | miR-635/6774-5p  | 2 |
| <i>circMLIP</i> | miR-636          | 1 |
| <i>circMLIP</i> | miR-637          | 1 |
| <i>circMLIP</i> | miR-638          | 1 |
| <i>circMLIP</i> | miR-641/3617-5p  | 5 |
| <i>circMLIP</i> | miR-642-3p       | 1 |
| <i>circMLIP</i> | miR-646          | 1 |
| <i>circMLIP</i> | miR-6499-3p      | 4 |
| <i>circMLIP</i> | miR-6500-3p      | 2 |
| <i>circMLIP</i> | miR-6501-5p      | 1 |
| <i>circMLIP</i> | miR-6502-3p      | 2 |
| <i>circMLIP</i> | miR-6503-3p      | 1 |
| <i>circMLIP</i> | miR-6504-3p      | 2 |
| <i>circMLIP</i> | miR-6505-5p      | 2 |
| <i>circMLIP</i> | miR-6507-3p      | 2 |
| <i>circMLIP</i> | miR-6508-5p/8067 | 2 |
| <i>circMLIP</i> | miR-651-5p       | 1 |
| <i>circMLIP</i> | miR-6510-5p      | 3 |
| <i>circMLIP</i> | miR-6512-5p      | 1 |
| <i>circMLIP</i> | miR-6513-3p      | 1 |
| <i>circMLIP</i> | miR-6513-5p      | 2 |
| <i>circMLIP</i> | miR-6514-5p      | 4 |
| <i>circMLIP</i> | miR-6515-5p      | 3 |

|                 |                     |   |
|-----------------|---------------------|---|
| <i>circMLIP</i> | miR-6516-3p         | 1 |
| <i>circMLIP</i> | miR-6516-5p         | 3 |
| <i>circMLIP</i> | miR-652-3p          | 1 |
| <i>circMLIP</i> | miR-653-5p          | 1 |
| <i>circMLIP</i> | miR-655-5p          | 2 |
| <i>circMLIP</i> | miR-656-3p          | 3 |
| <i>circMLIP</i> | miR-656-5p          | 2 |
| <i>circMLIP</i> | miR-658             | 1 |
| <i>circMLIP</i> | miR-661             | 1 |
| <i>circMLIP</i> | miR-668-3p          | 3 |
| <i>circMLIP</i> | miR-668-5p          | 1 |
| <i>circMLIP</i> | miR-671-5p          | 1 |
| <i>circMLIP</i> | miR-6715b-3p        | 1 |
| <i>circMLIP</i> | miR-6719-3p         | 2 |
| <i>circMLIP</i> | miR-6720-3p         | 1 |
| <i>circMLIP</i> | miR-6720-5p         | 1 |
| <i>circMLIP</i> | miR-6728-3p         | 1 |
| <i>circMLIP</i> | miR-6730-3p         | 2 |
| <i>circMLIP</i> | miR-6731-3p         | 1 |
| <i>circMLIP</i> | miR-6732-3p         | 1 |
| <i>circMLIP</i> | miR-6734-5p         | 1 |
| <i>circMLIP</i> | miR-6739-3p         | 2 |
| <i>circMLIP</i> | miR-6740-3p         | 1 |
| <i>circMLIP</i> | miR-6740-5p         | 2 |
| <i>circMLIP</i> | miR-6742-3p         | 1 |
| <i>circMLIP</i> | miR-6746-5p         | 1 |
| <i>circMLIP</i> | miR-6747-3p         | 1 |
| <i>circMLIP</i> | miR-6748-3p         | 2 |
| <i>circMLIP</i> | miR-675-3p          | 1 |
| <i>circMLIP</i> | miR-6750-3p         | 1 |
| <i>circMLIP</i> | miR-6750-5p/6822-5p | 1 |
| <i>circMLIP</i> | miR-6753-3p/7107-3p | 1 |
| <i>circMLIP</i> | miR-6755-5p         | 1 |
| <i>circMLIP</i> | miR-6757-3p         | 1 |
| <i>circMLIP</i> | miR-6758-5p/6856-5p | 1 |
| <i>circMLIP</i> | miR-6761-5p         | 1 |
| <i>circMLIP</i> | miR-6765-5p         | 1 |
| <i>circMLIP</i> | miR-6768-3p         | 2 |

|                 |                     |   |
|-----------------|---------------------|---|
| <i>circMLIP</i> | miR-6768-5p         | 1 |
| <i>circMLIP</i> | miR-6769a-3p        | 1 |
| <i>circMLIP</i> | miR-6770-5p         | 1 |
| <i>circMLIP</i> | miR-6771-3p         | 2 |
| <i>circMLIP</i> | miR-6772-5p         | 1 |
| <i>circMLIP</i> | miR-6774-3p         | 1 |
| <i>circMLIP</i> | miR-6779-3p         | 1 |
| <i>circMLIP</i> | miR-6782-3p         | 1 |
| <i>circMLIP</i> | miR-6782-5p         | 1 |
| <i>circMLIP</i> | miR-6789-3p         | 2 |
| <i>circMLIP</i> | miR-6794-3p         | 4 |
| <i>circMLIP</i> | miR-6795-3p         | 1 |
| <i>circMLIP</i> | miR-6798-5p         | 1 |
| <i>circMLIP</i> | miR-6799-5p         | 2 |
| <i>circMLIP</i> | miR-6800-3p         | 2 |
| <i>circMLIP</i> | miR-6801-3p/6810-3p | 1 |
| <i>circMLIP</i> | miR-6804-5p         | 2 |
| <i>circMLIP</i> | miR-6807-5p         | 3 |
| <i>circMLIP</i> | miR-6808-3p         | 2 |
| <i>circMLIP</i> | miR-6809-3p         | 1 |
| <i>circMLIP</i> | miR-6809-5p         | 1 |
| <i>circMLIP</i> | miR-6811-3p         | 2 |
| <i>circMLIP</i> | miR-6814-5p         | 1 |
| <i>circMLIP</i> | miR-6815-3p         | 1 |
| <i>circMLIP</i> | miR-6816-3p         | 4 |
| <i>circMLIP</i> | miR-6818-3p         | 1 |
| <i>circMLIP</i> | miR-6821-5p         | 1 |
| <i>circMLIP</i> | miR-6826-3p         | 1 |
| <i>circMLIP</i> | miR-6828-3p         | 1 |
| <i>circMLIP</i> | miR-6828-5p         | 1 |
| <i>circMLIP</i> | miR-6832-3p         | 3 |
| <i>circMLIP</i> | miR-6833-5p         | 3 |
| <i>circMLIP</i> | miR-6834-5p         | 1 |
| <i>circMLIP</i> | miR-6837-3p         | 2 |
| <i>circMLIP</i> | miR-6841-3p         | 1 |
| <i>circMLIP</i> | miR-6841-5p         | 1 |
| <i>circMLIP</i> | miR-6843-3p/6848-3p | 1 |
| <i>circMLIP</i> | miR-6846-3p         | 2 |

|                 |             |   |
|-----------------|-------------|---|
| <i>circMLIP</i> | miR-6847-3p | 1 |
| <i>circMLIP</i> | miR-6847-5p | 2 |
| <i>circMLIP</i> | miR-6849-3p | 2 |
| <i>circMLIP</i> | miR-6852-5p | 1 |
| <i>circMLIP</i> | miR-6857-3p | 3 |
| <i>circMLIP</i> | miR-6858-3p | 2 |
| <i>circMLIP</i> | miR-6859-3p | 2 |
| <i>circMLIP</i> | miR-6863    | 1 |
| <i>circMLIP</i> | miR-6867-3p | 1 |
| <i>circMLIP</i> | miR-6868-5p | 1 |
| <i>circMLIP</i> | miR-6869-5p | 2 |
| <i>circMLIP</i> | miR-6870-3p | 1 |
| <i>circMLIP</i> | miR-6873-5p | 1 |
| <i>circMLIP</i> | miR-6874-5p | 3 |
| <i>circMLIP</i> | miR-6875-3p | 1 |
| <i>circMLIP</i> | miR-6884-3p | 1 |
| <i>circMLIP</i> | miR-6886-3p | 1 |
| <i>circMLIP</i> | miR-6887-3p | 1 |
| <i>circMLIP</i> | miR-6888-3p | 1 |
| <i>circMLIP</i> | miR-6892-3p | 1 |
| <i>circMLIP</i> | miR-6892-5p | 1 |
| <i>circMLIP</i> | miR-6894-5p | 3 |
| <i>circMLIP</i> | miR-6895-3p | 1 |
| <i>circMLIP</i> | miR-7-3p    | 1 |
| <i>circMLIP</i> | miR-708-3p  | 2 |
| <i>circMLIP</i> | miR-7106-5p | 2 |
| <i>circMLIP</i> | miR-7112-3p | 1 |
| <i>circMLIP</i> | miR-7113-5p | 1 |
| <i>circMLIP</i> | miR-7114-5p | 3 |
| <i>circMLIP</i> | miR-7150    | 1 |
| <i>circMLIP</i> | miR-7151-5p | 1 |
| <i>circMLIP</i> | miR-7152-3p | 1 |
| <i>circMLIP</i> | miR-7152-5p | 1 |
| <i>circMLIP</i> | miR-7154-3p | 3 |
| <i>circMLIP</i> | miR-7154-5p | 1 |
| <i>circMLIP</i> | miR-7155-5p | 1 |
| <i>circMLIP</i> | miR-7156-3p | 4 |
| <i>circMLIP</i> | miR-7158-3p | 2 |



|                 |             |   |
|-----------------|-------------|---|
| <i>circMLIP</i> | miR-7159-3p | 3 |
| <i>circMLIP</i> | miR-7159-5p | 1 |
| <i>circMLIP</i> | miR-7160-5p | 3 |
| <i>circMLIP</i> | miR-7162-3p | 4 |
| <i>circMLIP</i> | miR-744-3p  | 1 |
| <i>circMLIP</i> | miR-7515    | 2 |
| <i>circMLIP</i> | miR-758-3p  | 5 |
| <i>circMLIP</i> | miR-758-5p  | 1 |
| <i>circMLIP</i> | miR-759     | 2 |
| <i>circMLIP</i> | miR-764     | 1 |
| <i>circMLIP</i> | miR-7641    | 1 |
| <i>circMLIP</i> | miR-765     | 3 |
| <i>circMLIP</i> | miR-766-5p  | 3 |
| <i>circMLIP</i> | miR-769-5p  | 1 |
| <i>circMLIP</i> | miR-7843-3p | 1 |
| <i>circMLIP</i> | miR-7845-5p | 2 |
| <i>circMLIP</i> | miR-7847-3p | 1 |
| <i>circMLIP</i> | miR-7849-3p | 2 |
| <i>circMLIP</i> | miR-7850-5p | 3 |
| <i>circMLIP</i> | miR-7854-3p | 1 |
| <i>circMLIP</i> | miR-7856-5p | 3 |
| <i>circMLIP</i> | miR-7973    | 1 |
| <i>circMLIP</i> | miR-7977    | 1 |
| <i>circMLIP</i> | miR-8055    | 5 |
| <i>circMLIP</i> | miR-8056    | 2 |
| <i>circMLIP</i> | miR-8060    | 2 |
| <i>circMLIP</i> | miR-8062    | 1 |
| <i>circMLIP</i> | miR-8063    | 1 |
| <i>circMLIP</i> | miR-8070    | 1 |
| <i>circMLIP</i> | miR-8074    | 2 |
| <i>circMLIP</i> | miR-8076    | 2 |
| <i>circMLIP</i> | miR-8077    | 3 |
| <i>circMLIP</i> | miR-8078    | 1 |
| <i>circMLIP</i> | miR-8080    | 4 |
| <i>circMLIP</i> | miR-8083    | 2 |
| <i>circMLIP</i> | miR-8084    | 3 |
| <i>circMLIP</i> | miR-8485    | 3 |
| <i>circMLIP</i> | miR-874-3p  | 1 |

|                  |                         |   |
|------------------|-------------------------|---|
| <i>circMLIP</i>  | miR-875-3p              | 2 |
| <i>circMLIP</i>  | miR-877-3p              | 2 |
| <i>circMLIP</i>  | miR-885-5p              | 1 |
| <i>circMLIP</i>  | miR-887-5p              | 2 |
| <i>circMLIP</i>  | miR-888-3p              | 1 |
| <i>circMLIP</i>  | miR-888-5p              | 3 |
| <i>circMLIP</i>  | miR-890                 | 1 |
| <i>circMLIP</i>  | miR-891a-3p             | 1 |
| <i>circMLIP</i>  | miR-892-5p              | 3 |
| <i>circMLIP</i>  | miR-892b                | 3 |
| <i>circMLIP</i>  | miR-9-3p                | 4 |
| <i>circMLIP</i>  | miR-921                 | 1 |
| <i>circMLIP</i>  | miR-922                 | 4 |
| <i>circMLIP</i>  | miR-936                 | 2 |
| <i>circMLIP</i>  | miR-938                 | 1 |
| <i>circMLIP</i>  | miR-939-3p              | 1 |
| <i>circMLIP</i>  | miR-940/6808-5p/6893-5p | 1 |
| <i>circMLIP</i>  | miR-942-5p              | 1 |
| <i>circMLIP</i>  | miR-944                 | 4 |
| <i>circMLIP</i>  | miR-95-5p               | 3 |
| <i>circMLIP</i>  | miR-9500                | 1 |
| <i>circMLIP</i>  | miR-96-3p               | 1 |
| <i>circMTUS1</i> | let-7a-2-3p/let-7g-3p   | 2 |
| <i>circMTUS1</i> | let-7c-3p               | 2 |
| <i>circMTUS1</i> | miR-1-5p                | 3 |
| <i>circMTUS1</i> | miR-10-5p               | 4 |
| <i>circMTUS1</i> | miR-101-3p.1            | 1 |
| <i>circMTUS1</i> | miR-103-3p/107          | 2 |
| <i>circMTUS1</i> | miR-106a-3p             | 1 |
| <i>circMTUS1</i> | miR-10a-3p              | 1 |
| <i>circMTUS1</i> | miR-10b-3p              | 1 |
| <i>circMTUS1</i> | miR-1179                | 2 |
| <i>circMTUS1</i> | miR-1183                | 2 |
| <i>circMTUS1</i> | miR-1184                | 2 |
| <i>circMTUS1</i> | miR-1185-5p             | 2 |
| <i>circMTUS1</i> | miR-1197                | 2 |
| <i>circMTUS1</i> | miR-1199-5p/6751-3p     | 2 |
| <i>circMTUS1</i> | miR-1205                | 2 |

|                  |                          |    |
|------------------|--------------------------|----|
| <i>circMTUS1</i> | miR-1224-3p              | 3  |
| <i>circMTUS1</i> | miR-1224-5p              | 2  |
| <i>circMTUS1</i> | miR-1226-5p              | 2  |
| <i>circMTUS1</i> | miR-1231                 | 2  |
| <i>circMTUS1</i> | miR-1233-5p/6778-5p      | 2  |
| <i>circMTUS1</i> | miR-1236-5p              | 3  |
| <i>circMTUS1</i> | miR-1238-3p              | 1  |
| <i>circMTUS1</i> | miR-1243                 | 3  |
| <i>circMTUS1</i> | miR-1245a/8079           | 5  |
| <i>circMTUS1</i> | miR-1247-3p              | 3  |
| <i>circMTUS1</i> | miR-1249-5p/6797-5p      | 1  |
| <i>circMTUS1</i> | miR-1250-3p              | 4  |
| <i>circMTUS1</i> | miR-1251-3p              | 2  |
| <i>circMTUS1</i> | miR-1252-3p              | 4  |
| <i>circMTUS1</i> | miR-1252-5p              | 2  |
| <i>circMTUS1</i> | miR-1253                 | 5  |
| <i>circMTUS1</i> | miR-1255b-2-3p           | 2  |
| <i>circMTUS1</i> | miR-1257                 | 2  |
| <i>circMTUS1</i> | miR-126-5p               | 1  |
| <i>circMTUS1</i> | miR-1262/4701-3p/6736-5p | 2  |
| <i>circMTUS1</i> | miR-1266-3p              | 4  |
| <i>circMTUS1</i> | miR-1266-5p/4518         | 2  |
| <i>circMTUS1</i> | miR-1267                 | 2  |
| <i>circMTUS1</i> | miR-1269                 | 2  |
| <i>circMTUS1</i> | miR-127-5p               | 2  |
| <i>circMTUS1</i> | miR-1272                 | 4  |
| <i>circMTUS1</i> | miR-1273d                | 11 |
| <i>circMTUS1</i> | miR-1276                 | 1  |
| <i>circMTUS1</i> | miR-1277-5p              | 2  |
| <i>circMTUS1</i> | miR-1278                 | 1  |
| <i>circMTUS1</i> | miR-128-3p               | 4  |
| <i>circMTUS1</i> | miR-1284                 | 2  |
| <i>circMTUS1</i> | miR-1287-5p              | 1  |
| <i>circMTUS1</i> | miR-129-5p               | 4  |
| <i>circMTUS1</i> | miR-1290                 | 3  |
| <i>circMTUS1</i> | miR-1292-5p              | 3  |
| <i>circMTUS1</i> | miR-1295b-3p             | 2  |
| <i>circMTUS1</i> | miR-1295b-5p/1912        | 7  |

|                  |                                      |   |
|------------------|--------------------------------------|---|
| <i>circMTUS1</i> | miR-1299                             | 1 |
| <i>circMTUS1</i> | miR-130-3p/301-3p/454-3p             | 2 |
| <i>circMTUS1</i> | miR-1304-5p                          | 3 |
| <i>circMTUS1</i> | miR-130b-5p                          | 1 |
| <i>circMTUS1</i> | miR-132-3p/212-3p                    | 3 |
| <i>circMTUS1</i> | miR-1322                             | 4 |
| <i>circMTUS1</i> | miR-1323                             | 7 |
| <i>circMTUS1</i> | miR-133a-5p                          | 5 |
| <i>circMTUS1</i> | miR-134-5p                           | 1 |
| <i>circMTUS1</i> | miR-135-5p                           | 2 |
| <i>circMTUS1</i> | miR-136-5p                           | 1 |
| <i>circMTUS1</i> | miR-138-5p                           | 5 |
| <i>circMTUS1</i> | miR-140-3p.1                         | 3 |
| <i>circMTUS1</i> | miR-141-3p/200-3p                    | 1 |
| <i>circMTUS1</i> | miR-142-3p.1                         | 1 |
| <i>circMTUS1</i> | miR-143-5p                           | 2 |
| <i>circMTUS1</i> | miR-144-3p                           | 1 |
| <i>circMTUS1</i> | miR-145-3p                           | 3 |
| <i>circMTUS1</i> | miR-145-5p                           | 1 |
| <i>circMTUS1</i> | miR-1468-3p                          | 2 |
| <i>circMTUS1</i> | miR-1470                             | 1 |
| <i>circMTUS1</i> | miR-15-5p/16-5p/195-5p/424-5p/497-5p | 2 |
| <i>circMTUS1</i> | miR-153-3p                           | 5 |
| <i>circMTUS1</i> | miR-153-5p                           | 8 |
| <i>circMTUS1</i> | miR-1537-5p                          | 2 |
| <i>circMTUS1</i> | miR-1539                             | 2 |
| <i>circMTUS1</i> | miR-155-5p                           | 3 |
| <i>circMTUS1</i> | miR-15b-3p                           | 2 |
| <i>circMTUS1</i> | miR-17-3p                            | 2 |
| <i>circMTUS1</i> | miR-17-5p/20-5p/93-5p/106-5p/519-3p  | 6 |
| <i>circMTUS1</i> | miR-18-5p                            | 2 |
| <i>circMTUS1</i> | miR-181d-3p                          | 2 |
| <i>circMTUS1</i> | miR-182-3p                           | 3 |
| <i>circMTUS1</i> | miR-182-5p                           | 1 |
| <i>circMTUS1</i> | miR-1827                             | 3 |
| <i>circMTUS1</i> | miR-183-3p                           | 5 |
| <i>circMTUS1</i> | miR-183-5p.2                         | 2 |
| <i>circMTUS1</i> | miR-185-3p                           | 1 |

|                  |                     |   |
|------------------|---------------------|---|
| <i>circMTUS1</i> | miR-186-5p          | 4 |
| <i>circMTUS1</i> | miR-19-5p           | 2 |
| <i>circMTUS1</i> | miR-190-5p          | 5 |
| <i>circMTUS1</i> | miR-191-3p          | 2 |
| <i>circMTUS1</i> | miR-1914-5p         | 4 |
| <i>circMTUS1</i> | miR-1915-3p/6764-5p | 1 |
| <i>circMTUS1</i> | miR-193b-5p         | 2 |
| <i>circMTUS1</i> | miR-1976            | 1 |
| <i>circMTUS1</i> | miR-199-3p          | 2 |
| <i>circMTUS1</i> | miR-200-3p/429      | 1 |
| <i>circMTUS1</i> | miR-202-5p          | 2 |
| <i>circMTUS1</i> | miR-204-3p/4646-5p  | 3 |
| <i>circMTUS1</i> | miR-205-3p          | 2 |
| <i>circMTUS1</i> | miR-2052            | 2 |
| <i>circMTUS1</i> | miR-2053            | 2 |
| <i>circMTUS1</i> | miR-2054            | 1 |
| <i>circMTUS1</i> | miR-208-5p          | 3 |
| <i>circMTUS1</i> | miR-20a-3p          | 2 |
| <i>circMTUS1</i> | miR-21-5p/590-5p    | 1 |
| <i>circMTUS1</i> | miR-2113            | 2 |
| <i>circMTUS1</i> | miR-2114-3p         | 1 |
| <i>circMTUS1</i> | miR-2115-3p         | 1 |
| <i>circMTUS1</i> | miR-2115-5p         | 1 |
| <i>circMTUS1</i> | miR-212-5p          | 2 |
| <i>circMTUS1</i> | miR-214-3p/3619-5p  | 7 |
| <i>circMTUS1</i> | miR-214-5p          | 1 |
| <i>circMTUS1</i> | miR-215-3p          | 1 |
| <i>circMTUS1</i> | miR-216b-3p         | 2 |
| <i>circMTUS1</i> | miR-217             | 2 |
| <i>circMTUS1</i> | miR-218-1-3p        | 3 |
| <i>circMTUS1</i> | miR-218-2-3p        | 3 |
| <i>circMTUS1</i> | miR-219-5p          | 1 |
| <i>circMTUS1</i> | miR-219a-1-3p       | 1 |
| <i>circMTUS1</i> | miR-22-3p           | 1 |
| <i>circMTUS1</i> | miR-221-5p/8073     | 1 |
| <i>circMTUS1</i> | miR-2276-3p         | 4 |
| <i>circMTUS1</i> | miR-2278            | 7 |
| <i>circMTUS1</i> | miR-23-5p           | 2 |

|                  |                                 |   |
|------------------|---------------------------------|---|
| <i>circMTUS1</i> | miR-2355-3p                     | 2 |
| <i>circMTUS1</i> | miR-2392                        | 1 |
| <i>circMTUS1</i> | miR-24-3p                       | 1 |
| <i>circMTUS1</i> | miR-24-5p                       | 2 |
| <i>circMTUS1</i> | miR-2467-5p                     | 1 |
| <i>circMTUS1</i> | miR-2681-5p                     | 1 |
| <i>circMTUS1</i> | miR-27b-5p                      | 1 |
| <i>circMTUS1</i> | miR-29-3p                       | 4 |
| <i>circMTUS1</i> | miR-298                         | 6 |
| <i>circMTUS1</i> | miR-299-5p                      | 3 |
| <i>circMTUS1</i> | miR-29a-5p                      | 2 |
| <i>circMTUS1</i> | miR-29b-2-5p                    | 2 |
| <i>circMTUS1</i> | miR-29c-5p                      | 1 |
| <i>circMTUS1</i> | miR-30-3p                       | 3 |
| <i>circMTUS1</i> | miR-301a-5p/301b-5p             | 1 |
| <i>circMTUS1</i> | miR-302-3p/372-3p/373-3p/520-3p | 4 |
| <i>circMTUS1</i> | miR-302c-3p.2/520-3p            | 3 |
| <i>circMTUS1</i> | miR-302c-5p                     | 2 |
| <i>circMTUS1</i> | miR-3064-5p                     | 2 |
| <i>circMTUS1</i> | miR-3065-3p                     | 2 |
| <i>circMTUS1</i> | miR-3065-5p                     | 9 |
| <i>circMTUS1</i> | miR-3074-3p                     | 1 |
| <i>circMTUS1</i> | miR-3074-5p                     | 3 |
| <i>circMTUS1</i> | miR-3117-3p                     | 1 |
| <i>circMTUS1</i> | miR-3117-5p                     | 2 |
| <i>circMTUS1</i> | miR-3120-3p                     | 2 |
| <i>circMTUS1</i> | miR-3120-5p                     | 2 |
| <i>circMTUS1</i> | miR-3121-3p                     | 4 |
| <i>circMTUS1</i> | miR-3121-5p                     | 5 |
| <i>circMTUS1</i> | miR-3126-5p                     | 3 |
| <i>circMTUS1</i> | miR-3128                        | 1 |
| <i>circMTUS1</i> | miR-3129-3p/5583-5p             | 1 |
| <i>circMTUS1</i> | miR-3130-3p                     | 3 |
| <i>circMTUS1</i> | miR-3130-5p/4482-5p             | 7 |
| <i>circMTUS1</i> | miR-3133                        | 4 |
| <i>circMTUS1</i> | miR-3135a                       | 2 |
| <i>circMTUS1</i> | miR-3135b                       | 1 |
| <i>circMTUS1</i> | miR-3136-5p/4439                | 3 |

|                  |                           |   |
|------------------|---------------------------|---|
| <i>circMTUS1</i> | miR-3140-3p               | 2 |
| <i>circMTUS1</i> | miR-3145-3p               | 2 |
| <i>circMTUS1</i> | miR-3146                  | 3 |
| <i>circMTUS1</i> | miR-3148                  | 4 |
| <i>circMTUS1</i> | miR-3149                  | 2 |
| <i>circMTUS1</i> | miR-3150a-5p/3150b-5p     | 1 |
| <i>circMTUS1</i> | miR-3150b-3p              | 1 |
| <i>circMTUS1</i> | miR-3152-3p               | 2 |
| <i>circMTUS1</i> | miR-3152-5p               | 2 |
| <i>circMTUS1</i> | miR-3153/6733-5p/6739-5p  | 3 |
| <i>circMTUS1</i> | miR-3158-3p               | 2 |
| <i>circMTUS1</i> | miR-3158-5p               | 2 |
| <i>circMTUS1</i> | miR-3159                  | 4 |
| <i>circMTUS1</i> | miR-3160-3p               | 2 |
| <i>circMTUS1</i> | miR-3163                  | 6 |
| <i>circMTUS1</i> | miR-3164                  | 1 |
| <i>circMTUS1</i> | miR-3165                  | 1 |
| <i>circMTUS1</i> | miR-3169                  | 1 |
| <i>circMTUS1</i> | miR-3170/6855-5p          | 1 |
| <i>circMTUS1</i> | miR-3173-3p/6891-5p       | 4 |
| <i>circMTUS1</i> | miR-3174                  | 4 |
| <i>circMTUS1</i> | miR-3188                  | 1 |
| <i>circMTUS1</i> | miR-3189-3p               | 2 |
| <i>circMTUS1</i> | miR-3190-3p               | 2 |
| <i>circMTUS1</i> | miR-3192-3p               | 4 |
| <i>circMTUS1</i> | miR-3192-5p               | 3 |
| <i>circMTUS1</i> | miR-3193                  | 4 |
| <i>circMTUS1</i> | miR-3194-3p               | 2 |
| <i>circMTUS1</i> | miR-3194-5p               | 5 |
| <i>circMTUS1</i> | miR-3198/4309             | 1 |
| <i>circMTUS1</i> | miR-3201/4791             | 3 |
| <i>circMTUS1</i> | miR-323b-5p/410-5p/494-5p | 1 |
| <i>circMTUS1</i> | miR-329-5p                | 4 |
| <i>circMTUS1</i> | miR-330-3p                | 4 |
| <i>circMTUS1</i> | miR-330-3p.2              | 4 |
| <i>circMTUS1</i> | miR-338-3p                | 3 |
| <i>circMTUS1</i> | miR-33b-3p/515-3p/519e-3p | 2 |
| <i>circMTUS1</i> | miR-340-3p/6827-3p        | 1 |

|                  |                    |   |
|------------------|--------------------|---|
| <i>circMTUS1</i> | miR-340-5p         | 1 |
| <i>circMTUS1</i> | miR-3605-3p        | 1 |
| <i>circMTUS1</i> | miR-3605-5p        | 2 |
| <i>circMTUS1</i> | miR-3607-3p        | 2 |
| <i>circMTUS1</i> | miR-3612           | 2 |
| <i>circMTUS1</i> | miR-3613-3p        | 3 |
| <i>circMTUS1</i> | miR-3613-5p        | 2 |
| <i>circMTUS1</i> | miR-3614-3p        | 3 |
| <i>circMTUS1</i> | miR-3614-5p        | 3 |
| <i>circMTUS1</i> | miR-362-5p/500b-5p | 5 |
| <i>circMTUS1</i> | miR-3622a-5p       | 4 |
| <i>circMTUS1</i> | miR-3646           | 4 |
| <i>circMTUS1</i> | miR-365-3p         | 2 |
| <i>circMTUS1</i> | miR-3650           | 1 |
| <i>circMTUS1</i> | miR-3651           | 2 |
| <i>circMTUS1</i> | miR-3652/4430      | 2 |
| <i>circMTUS1</i> | miR-3653-5p        | 1 |
| <i>circMTUS1</i> | miR-3654           | 3 |
| <i>circMTUS1</i> | miR-3658           | 1 |
| <i>circMTUS1</i> | miR-3663-3p        | 3 |
| <i>circMTUS1</i> | miR-3663-5p        | 2 |
| <i>circMTUS1</i> | miR-3664-3p        | 2 |
| <i>circMTUS1</i> | miR-367-5p         | 2 |
| <i>circMTUS1</i> | miR-3671           | 2 |
| <i>circMTUS1</i> | miR-3672/6864-3p   | 4 |
| <i>circMTUS1</i> | miR-3677-3p        | 2 |
| <i>circMTUS1</i> | miR-3677-5p        | 1 |
| <i>circMTUS1</i> | miR-3680-3p        | 2 |
| <i>circMTUS1</i> | miR-3680-5p        | 2 |
| <i>circMTUS1</i> | miR-3684           | 2 |
| <i>circMTUS1</i> | miR-3685           | 2 |
| <i>circMTUS1</i> | miR-3688-5p        | 1 |
| <i>circMTUS1</i> | miR-3689d/6851-5p  | 1 |
| <i>circMTUS1</i> | miR-369-3p         | 1 |
| <i>circMTUS1</i> | miR-3692-5p        | 3 |
| <i>circMTUS1</i> | miR-370-3p         | 3 |
| <i>circMTUS1</i> | miR-371-5p         | 1 |
| <i>circMTUS1</i> | miR-3713           | 1 |



|                  |                           |    |
|------------------|---------------------------|----|
| <i>circMTUS1</i> | miR-371a-3p               | 2  |
| <i>circMTUS1</i> | miR-371b-3p               | 2  |
| <i>circMTUS1</i> | miR-371b-5p/373-5p/616-5p | 1  |
| <i>circMTUS1</i> | miR-372-5p                | 1  |
| <i>circMTUS1</i> | miR-374-5p                | 2  |
| <i>circMTUS1</i> | miR-374a-3p               | 2  |
| <i>circMTUS1</i> | miR-375                   | 4  |
| <i>circMTUS1</i> | miR-376a-2-5p             | 1  |
| <i>circMTUS1</i> | miR-376a-5p               | 1  |
| <i>circMTUS1</i> | miR-377-3p                | 3  |
| <i>circMTUS1</i> | miR-377-5p/6086           | 4  |
| <i>circMTUS1</i> | miR-378-3p                | 1  |
| <i>circMTUS1</i> | miR-378j/6839-5p          | 1  |
| <i>circMTUS1</i> | miR-383-3p                | 2  |
| <i>circMTUS1</i> | miR-384                   | 2  |
| <i>circMTUS1</i> | miR-3911                  | 1  |
| <i>circMTUS1</i> | miR-3912-5p               | 1  |
| <i>circMTUS1</i> | miR-3915                  | 2  |
| <i>circMTUS1</i> | miR-3918                  | 1  |
| <i>circMTUS1</i> | miR-3919                  | 2  |
| <i>circMTUS1</i> | miR-3921/4653-5p          | 1  |
| <i>circMTUS1</i> | miR-3928-3p               | 1  |
| <i>circMTUS1</i> | miR-3929/4419b/4478       | 4  |
| <i>circMTUS1</i> | miR-3936                  | 1  |
| <i>circMTUS1</i> | miR-3941                  | 9  |
| <i>circMTUS1</i> | miR-3942-3p               | 9  |
| <i>circMTUS1</i> | miR-3975                  | 1  |
| <i>circMTUS1</i> | miR-3977                  | 3  |
| <i>circMTUS1</i> | miR-3978                  | 10 |
| <i>circMTUS1</i> | miR-410-3p                | 2  |
| <i>circMTUS1</i> | miR-411-5p.1              | 1  |
| <i>circMTUS1</i> | miR-423-5p                | 1  |
| <i>circMTUS1</i> | miR-425-5p                | 2  |
| <i>circMTUS1</i> | miR-4261                  | 1  |
| <i>circMTUS1</i> | miR-4263                  | 8  |
| <i>circMTUS1</i> | miR-4267                  | 3  |
| <i>circMTUS1</i> | miR-4268                  | 1  |
| <i>circMTUS1</i> | miR-4271/4725-3p/6780b-5p | 1  |

|                  |                                    |    |
|------------------|------------------------------------|----|
| <i>circMTUS1</i> | miR-4272                           | 2  |
| <i>circMTUS1</i> | miR-4274                           | 8  |
| <i>circMTUS1</i> | miR-4275                           | 1  |
| <i>circMTUS1</i> | miR-4276                           | 5  |
| <i>circMTUS1</i> | miR-4279                           | 1  |
| <i>circMTUS1</i> | miR-4282                           | 3  |
| <i>circMTUS1</i> | miR-4284                           | 1  |
| <i>circMTUS1</i> | miR-4286                           | 2  |
| <i>circMTUS1</i> | miR-4292/6791-5p                   | 1  |
| <i>circMTUS1</i> | miR-4293                           | 2  |
| <i>circMTUS1</i> | miR-4305                           | 2  |
| <i>circMTUS1</i> | miR-4308                           | 1  |
| <i>circMTUS1</i> | miR-4310/7157-5p                   | 3  |
| <i>circMTUS1</i> | miR-4311                           | 1  |
| <i>circMTUS1</i> | miR-4312                           | 1  |
| <i>circMTUS1</i> | miR-4314                           | 1  |
| <i>circMTUS1</i> | miR-4318                           | 5  |
| <i>circMTUS1</i> | miR-432-3p                         | 1  |
| <i>circMTUS1</i> | miR-432-5p                         | 2  |
| <i>circMTUS1</i> | miR-4320                           | 1  |
| <i>circMTUS1</i> | miR-4325                           | 2  |
| <i>circMTUS1</i> | miR-4326                           | 2  |
| <i>circMTUS1</i> | miR-4327                           | 3  |
| <i>circMTUS1</i> | miR-4328                           | 6  |
| <i>circMTUS1</i> | miR-4419a/4510/6127/6129/6130/6133 | 3  |
| <i>circMTUS1</i> | miR-4421/5699-3p                   | 1  |
| <i>circMTUS1</i> | miR-4422                           | 4  |
| <i>circMTUS1</i> | miR-4423-3p                        | 1  |
| <i>circMTUS1</i> | miR-4426/4647/4662b                | 10 |
| <i>circMTUS1</i> | miR-4428                           | 4  |
| <i>circMTUS1</i> | miR-4432                           | 2  |
| <i>circMTUS1</i> | miR-4433a-3p                       | 3  |
| <i>circMTUS1</i> | miR-4434/4516/5703                 | 7  |
| <i>circMTUS1</i> | miR-4437                           | 3  |
| <i>circMTUS1</i> | miR-4440                           | 2  |
| <i>circMTUS1</i> | miR-4443                           | 2  |
| <i>circMTUS1</i> | miR-4445-5p                        | 1  |
| <i>circMTUS1</i> | miR-4446-3p                        | 2  |

|                  |                     |   |
|------------------|---------------------|---|
| <i>circMTUS1</i> | miR-4446-5p         | 1 |
| <i>circMTUS1</i> | miR-4448            | 1 |
| <i>circMTUS1</i> | miR-4450            | 1 |
| <i>circMTUS1</i> | miR-4452            | 5 |
| <i>circMTUS1</i> | miR-4453/4538       | 2 |
| <i>circMTUS1</i> | miR-4459            | 3 |
| <i>circMTUS1</i> | miR-4460            | 1 |
| <i>circMTUS1</i> | miR-4461            | 1 |
| <i>circMTUS1</i> | miR-4464/4748       | 4 |
| <i>circMTUS1</i> | miR-4471/8059       | 3 |
| <i>circMTUS1</i> | miR-4473            | 1 |
| <i>circMTUS1</i> | miR-4474-3p         | 1 |
| <i>circMTUS1</i> | miR-4476/6876-5p    | 2 |
| <i>circMTUS1</i> | miR-448             | 5 |
| <i>circMTUS1</i> | miR-4487            | 2 |
| <i>circMTUS1</i> | miR-4490            | 1 |
| <i>circMTUS1</i> | miR-4495            | 2 |
| <i>circMTUS1</i> | miR-4496            | 8 |
| <i>circMTUS1</i> | miR-449c-3p         | 2 |
| <i>circMTUS1</i> | miR-4501            | 1 |
| <i>circMTUS1</i> | miR-4502            | 6 |
| <i>circMTUS1</i> | miR-4503            | 3 |
| <i>circMTUS1</i> | miR-4505/5787       | 2 |
| <i>circMTUS1</i> | miR-450b-3p/769-3p  | 3 |
| <i>circMTUS1</i> | miR-450b-5p         | 2 |
| <i>circMTUS1</i> | miR-4517            | 2 |
| <i>circMTUS1</i> | miR-4519            | 8 |
| <i>circMTUS1</i> | miR-452-5p/892-3p   | 1 |
| <i>circMTUS1</i> | miR-4520-2-3p       | 3 |
| <i>circMTUS1</i> | miR-4521            | 1 |
| <i>circMTUS1</i> | miR-4522            | 1 |
| <i>circMTUS1</i> | miR-4524-5p         | 1 |
| <i>circMTUS1</i> | miR-4529-3p         | 3 |
| <i>circMTUS1</i> | miR-4530            | 3 |
| <i>circMTUS1</i> | miR-455-3p.2        | 2 |
| <i>circMTUS1</i> | miR-4633-3p/6500-5p | 1 |
| <i>circMTUS1</i> | miR-4635            | 4 |
| <i>circMTUS1</i> | miR-4638-3p         | 1 |

|                  |                             |   |
|------------------|-----------------------------|---|
| <i>circMTUS1</i> | miR-4639-3p                 | 1 |
| <i>circMTUS1</i> | miR-4640-3p                 | 2 |
| <i>circMTUS1</i> | miR-4643                    | 5 |
| <i>circMTUS1</i> | miR-4646-3p                 | 2 |
| <i>circMTUS1</i> | miR-4648                    | 2 |
| <i>circMTUS1</i> | miR-4653-3p                 | 1 |
| <i>circMTUS1</i> | miR-4654/4769-5p            | 2 |
| <i>circMTUS1</i> | miR-4659a-3p/4659b-3p       | 4 |
| <i>circMTUS1</i> | miR-4661-3p                 | 1 |
| <i>circMTUS1</i> | miR-4662-5p                 | 4 |
| <i>circMTUS1</i> | miR-4663                    | 2 |
| <i>circMTUS1</i> | miR-4666b                   | 5 |
| <i>circMTUS1</i> | miR-4667-3p                 | 1 |
| <i>circMTUS1</i> | miR-4667-5p/4700-5p/8089    | 1 |
| <i>circMTUS1</i> | miR-4668-3p                 | 6 |
| <i>circMTUS1</i> | miR-4668-5p                 | 3 |
| <i>circMTUS1</i> | miR-4671-3p                 | 1 |
| <i>circMTUS1</i> | miR-4672                    | 9 |
| <i>circMTUS1</i> | miR-4685-5p/6837-5p         | 2 |
| <i>circMTUS1</i> | miR-4687-3p                 | 2 |
| <i>circMTUS1</i> | miR-4689/6858-5p            | 2 |
| <i>circMTUS1</i> | miR-4691-5p/6792-3p         | 1 |
| <i>circMTUS1</i> | miR-4693-3p                 | 3 |
| <i>circMTUS1</i> | miR-4693-5p                 | 2 |
| <i>circMTUS1</i> | miR-4694-5p                 | 4 |
| <i>circMTUS1</i> | miR-4695-5p                 | 3 |
| <i>circMTUS1</i> | miR-4698                    | 4 |
| <i>circMTUS1</i> | miR-4699-3p                 | 2 |
| <i>circMTUS1</i> | miR-4700-3p                 | 3 |
| <i>circMTUS1</i> | miR-4704-3p                 | 1 |
| <i>circMTUS1</i> | miR-4711-3p                 | 1 |
| <i>circMTUS1</i> | miR-4712-3p                 | 4 |
| <i>circMTUS1</i> | miR-4713-3p                 | 2 |
| <i>circMTUS1</i> | miR-4718                    | 2 |
| <i>circMTUS1</i> | miR-4719                    | 7 |
| <i>circMTUS1</i> | miR-4720-3p                 | 2 |
| <i>circMTUS1</i> | miR-4720-5p/4799-3p/5588-5p | 1 |
| <i>circMTUS1</i> | miR-4724-3p                 | 2 |

|                  |                     |    |
|------------------|---------------------|----|
| <i>circMTUS1</i> | miR-4726-3p         | 1  |
| <i>circMTUS1</i> | miR-4727-3p         | 1  |
| <i>circMTUS1</i> | miR-4729            | 6  |
| <i>circMTUS1</i> | miR-4734            | 2  |
| <i>circMTUS1</i> | miR-4735-5p         | 2  |
| <i>circMTUS1</i> | miR-4738-3p         | 4  |
| <i>circMTUS1</i> | miR-4751            | 2  |
| <i>circMTUS1</i> | miR-4752            | 2  |
| <i>circMTUS1</i> | miR-4753-3p         | 1  |
| <i>circMTUS1</i> | miR-4754            | 3  |
| <i>circMTUS1</i> | miR-4755-5p/5006-3p | 1  |
| <i>circMTUS1</i> | miR-4756-3p         | 2  |
| <i>circMTUS1</i> | miR-4759            | 1  |
| <i>circMTUS1</i> | miR-4760-3p         | 5  |
| <i>circMTUS1</i> | miR-4762-5p         | 3  |
| <i>circMTUS1</i> | miR-4765            | 3  |
| <i>circMTUS1</i> | miR-4766-3p         | 1  |
| <i>circMTUS1</i> | miR-4766-5p         | 12 |
| <i>circMTUS1</i> | miR-4768-3p         | 3  |
| <i>circMTUS1</i> | miR-4772-3p         | 4  |
| <i>circMTUS1</i> | miR-4774-3p         | 2  |
| <i>circMTUS1</i> | miR-4774-5p         | 1  |
| <i>circMTUS1</i> | miR-4779            | 3  |
| <i>circMTUS1</i> | miR-4782-5p/5706    | 1  |
| <i>circMTUS1</i> | miR-4786-3p         | 5  |
| <i>circMTUS1</i> | miR-4787-5p         | 1  |
| <i>circMTUS1</i> | miR-4789-3p         | 5  |
| <i>circMTUS1</i> | miR-4790-3p         | 1  |
| <i>circMTUS1</i> | miR-4793-3p         | 3  |
| <i>circMTUS1</i> | miR-4793-5p         | 2  |
| <i>circMTUS1</i> | miR-4795-5p         | 1  |
| <i>circMTUS1</i> | miR-4796-3p         | 1  |
| <i>circMTUS1</i> | miR-4797-5p         | 2  |
| <i>circMTUS1</i> | miR-4798-3p         | 2  |
| <i>circMTUS1</i> | miR-4799-5p         | 2  |
| <i>circMTUS1</i> | miR-4802-3p         | 3  |
| <i>circMTUS1</i> | miR-4804-3p         | 2  |
| <i>circMTUS1</i> | miR-483-3p.1        | 1  |

|                  |                          |   |
|------------------|--------------------------|---|
| <i>circMTUS1</i> | miR-484/3155             | 3 |
| <i>circMTUS1</i> | miR-485-5p               | 1 |
| <i>circMTUS1</i> | miR-487-3p               | 2 |
| <i>circMTUS1</i> | miR-488-3p               | 1 |
| <i>circMTUS1</i> | miR-493-3p               | 1 |
| <i>circMTUS1</i> | miR-493-5p               | 2 |
| <i>circMTUS1</i> | miR-494-3p               | 2 |
| <i>circMTUS1</i> | miR-495-3p               | 7 |
| <i>circMTUS1</i> | miR-4999-5p              | 2 |
| <i>circMTUS1</i> | miR-5002-5p              | 6 |
| <i>circMTUS1</i> | miR-5004-3p              | 1 |
| <i>circMTUS1</i> | miR-5004-5p              | 2 |
| <i>circMTUS1</i> | miR-5007-3p              | 1 |
| <i>circMTUS1</i> | miR-5009-3p              | 2 |
| <i>circMTUS1</i> | miR-5009-5p/8058         | 2 |
| <i>circMTUS1</i> | miR-500a-5p              | 1 |
| <i>circMTUS1</i> | miR-500b-3p              | 3 |
| <i>circMTUS1</i> | miR-501-3p/502-3p        | 1 |
| <i>circMTUS1</i> | miR-501-5p               | 5 |
| <i>circMTUS1</i> | miR-5010-3p              | 2 |
| <i>circMTUS1</i> | miR-5011-3p              | 5 |
| <i>circMTUS1</i> | miR-502-5p               | 3 |
| <i>circMTUS1</i> | miR-503-5p               | 2 |
| <i>circMTUS1</i> | miR-504-5p.1             | 4 |
| <i>circMTUS1</i> | miR-505-5p               | 1 |
| <i>circMTUS1</i> | miR-507/557              | 2 |
| <i>circMTUS1</i> | miR-508-3p               | 1 |
| <i>circMTUS1</i> | miR-5088-5p              | 2 |
| <i>circMTUS1</i> | miR-5089-3p              | 2 |
| <i>circMTUS1</i> | miR-5089-5p              | 3 |
| <i>circMTUS1</i> | miR-509-3-5p/509-5p/4418 | 2 |
| <i>circMTUS1</i> | miR-509-3p               | 1 |
| <i>circMTUS1</i> | miR-5093                 | 8 |
| <i>circMTUS1</i> | miR-5094                 | 3 |
| <i>circMTUS1</i> | miR-510-3p               | 7 |
| <i>circMTUS1</i> | miR-510-5p               | 1 |
| <i>circMTUS1</i> | miR-511-3p               | 2 |
| <i>circMTUS1</i> | miR-511-5p               | 2 |

|                  |                                                                  |    |
|------------------|------------------------------------------------------------------|----|
| <i>circMTUS1</i> | miR-512-3p                                                       | 3  |
| <i>circMTUS1</i> | miR-512-5p                                                       | 2  |
| <i>circMTUS1</i> | miR-513a-3p/513c-3p/3606-3p                                      | 2  |
| <i>circMTUS1</i> | miR-513c-5p/514b-5p                                              | 1  |
| <i>circMTUS1</i> | miR-514a-3p                                                      | 3  |
| <i>circMTUS1</i> | miR-516a-3p/516b-3p/7162-5p                                      | 1  |
| <i>circMTUS1</i> | miR-516b-5p                                                      | 1  |
| <i>circMTUS1</i> | miR-518a-5p/527                                                  | 8  |
| <i>circMTUS1</i> | miR-519-3p                                                       | 4  |
| <i>circMTUS1</i> | miR-5190                                                         | 8  |
| <i>circMTUS1</i> | miR-5194                                                         | 1  |
| <i>circMTUS1</i> | miR-5196-3p                                                      | 2  |
| <i>circMTUS1</i> | miR-519d-5p                                                      | 4  |
| <i>circMTUS1</i> | miR-520f-5p                                                      | 1  |
| <i>circMTUS1</i> | miR-526b-5p                                                      | 2  |
| <i>circMTUS1</i> | miR-539-5p                                                       | 6  |
| <i>circMTUS1</i> | miR-541-5p                                                       | 2  |
| <i>circMTUS1</i> | miR-542-5p                                                       | 1  |
| <i>circMTUS1</i> | miR-548ac/548bb-3p/548d-3p/548h-3p/548z                          | 10 |
| <i>circMTUS1</i> | miR-548ah-5p/3609                                                | 6  |
| <i>circMTUS1</i> | miR-548aj-5p/548f-5p/548g-5p/548x-5p                             | 2  |
| <i>circMTUS1</i> | miR-548ao-5p/548ax                                               | 3  |
| <i>circMTUS1</i> | miR-548ap-3p/548aa/548t-3p                                       | 7  |
| <i>circMTUS1</i> | miR-548aq-3p/548am-3p/548aj-3p/548ah-3p/548ae-3p/548j-3p/548x-3p | 10 |
| <i>circMTUS1</i> | miR-548as-3p                                                     | 7  |
| <i>circMTUS1</i> | miR-548at-5p                                                     | 5  |
| <i>circMTUS1</i> | miR-548av-3p                                                     | 5  |
| <i>circMTUS1</i> | miR-548av-5p/548k/8054                                           | 2  |
| <i>circMTUS1</i> | miR-548aw                                                        | 8  |
| <i>circMTUS1</i> | miR-548ay-3p/548at-3p                                            | 7  |
| <i>circMTUS1</i> | miR-548ay-5p/548au-5p/548as-5p/548ar-3p/548aq-5p/548ap-5p/548am- | 7  |
| <i>circMTUS1</i> | miR-548az-3p/548ar-3p/548a-3p/548e-3p/548f-3p                    | 7  |
| <i>circMTUS1</i> | miR-548az-5p/548t-5p                                             | 6  |
| <i>circMTUS1</i> | miR-548c-3p                                                      | 6  |
| <i>circMTUS1</i> | miR-548g-3p                                                      | 3  |
| <i>circMTUS1</i> | miR-548l                                                         | 2  |
| <i>circMTUS1</i> | miR-548n                                                         | 6  |
| <i>circMTUS1</i> | miR-548u/7161-5p                                                 | 2  |

|                  |                               |    |
|------------------|-------------------------------|----|
| <i>circMTUS1</i> | miR-550a-3-5p/550a-5p/1271-3p | 2  |
| <i>circMTUS1</i> | miR-551b-5p                   | 11 |
| <i>circMTUS1</i> | miR-552-5p                    | 1  |
| <i>circMTUS1</i> | miR-556-5p                    | 1  |
| <i>circMTUS1</i> | miR-5571-5p                   | 5  |
| <i>circMTUS1</i> | miR-558                       | 2  |
| <i>circMTUS1</i> | miR-5582-3p                   | 5  |
| <i>circMTUS1</i> | miR-5582-5p                   | 4  |
| <i>circMTUS1</i> | miR-5583-3p                   | 2  |
| <i>circMTUS1</i> | miR-5584-5p                   | 1  |
| <i>circMTUS1</i> | miR-5585-5p                   | 3  |
| <i>circMTUS1</i> | miR-5586-3p                   | 3  |
| <i>circMTUS1</i> | miR-5586-5p                   | 2  |
| <i>circMTUS1</i> | miR-5589-3p                   | 1  |
| <i>circMTUS1</i> | miR-561-3p                    | 5  |
| <i>circMTUS1</i> | miR-562                       | 2  |
| <i>circMTUS1</i> | miR-568                       | 2  |
| <i>circMTUS1</i> | miR-5680                      | 8  |
| <i>circMTUS1</i> | miR-5684                      | 1  |
| <i>circMTUS1</i> | miR-5689                      | 5  |
| <i>circMTUS1</i> | miR-5691                      | 2  |
| <i>circMTUS1</i> | miR-5692a                     | 3  |
| <i>circMTUS1</i> | miR-5692bc                    | 1  |
| <i>circMTUS1</i> | miR-5695                      | 4  |
| <i>circMTUS1</i> | miR-5696                      | 8  |
| <i>circMTUS1</i> | miR-570-3p                    | 4  |
| <i>circMTUS1</i> | miR-5700                      | 2  |
| <i>circMTUS1</i> | miR-571                       | 1  |
| <i>circMTUS1</i> | miR-573/3616-5p               | 2  |
| <i>circMTUS1</i> | miR-575/4676-5p               | 7  |
| <i>circMTUS1</i> | miR-576-5p                    | 8  |
| <i>circMTUS1</i> | miR-579-3p                    | 8  |
| <i>circMTUS1</i> | miR-580-3p                    | 2  |
| <i>circMTUS1</i> | miR-583                       | 1  |
| <i>circMTUS1</i> | miR-590-3p                    | 3  |
| <i>circMTUS1</i> | miR-592                       | 2  |
| <i>circMTUS1</i> | miR-593-3p                    | 1  |
| <i>circMTUS1</i> | miR-596                       | 2  |



|                  |                    |   |
|------------------|--------------------|---|
| <i>circMTUS1</i> | miR-599            | 2 |
| <i>circMTUS1</i> | miR-604            | 2 |
| <i>circMTUS1</i> | miR-605-5p         | 3 |
| <i>circMTUS1</i> | miR-607            | 3 |
| <i>circMTUS1</i> | miR-6073           | 1 |
| <i>circMTUS1</i> | miR-6076/6797-3p   | 3 |
| <i>circMTUS1</i> | miR-6080           | 2 |
| <i>circMTUS1</i> | miR-6083           | 1 |
| <i>circMTUS1</i> | miR-6124           | 4 |
| <i>circMTUS1</i> | miR-6126           | 2 |
| <i>circMTUS1</i> | miR-6128           | 5 |
| <i>circMTUS1</i> | miR-6131           | 5 |
| <i>circMTUS1</i> | miR-616-3p         | 6 |
| <i>circMTUS1</i> | miR-619-5p/6506-5p | 3 |
| <i>circMTUS1</i> | miR-621            | 1 |
| <i>circMTUS1</i> | miR-622            | 2 |
| <i>circMTUS1</i> | miR-626/6876-3p    | 1 |
| <i>circMTUS1</i> | miR-627-5p         | 1 |
| <i>circMTUS1</i> | miR-629-5p         | 2 |
| <i>circMTUS1</i> | miR-632/4288       | 2 |
| <i>circMTUS1</i> | miR-633            | 1 |
| <i>circMTUS1</i> | miR-634            | 2 |
| <i>circMTUS1</i> | miR-636            | 1 |
| <i>circMTUS1</i> | miR-637            | 1 |
| <i>circMTUS1</i> | miR-638            | 2 |
| <i>circMTUS1</i> | miR-640            | 2 |
| <i>circMTUS1</i> | miR-642a-5p        | 1 |
| <i>circMTUS1</i> | miR-644a           | 1 |
| <i>circMTUS1</i> | miR-646            | 2 |
| <i>circMTUS1</i> | miR-647            | 2 |
| <i>circMTUS1</i> | miR-6500-3p        | 3 |
| <i>circMTUS1</i> | miR-6501-3p        | 7 |
| <i>circMTUS1</i> | miR-6502-3p        | 7 |
| <i>circMTUS1</i> | miR-6503-3p        | 1 |
| <i>circMTUS1</i> | miR-6504-3p        | 2 |
| <i>circMTUS1</i> | miR-6505-5p        | 3 |
| <i>circMTUS1</i> | miR-6507-3p        | 5 |
| <i>circMTUS1</i> | miR-6511-3p        | 2 |

|                  |                             |   |
|------------------|-----------------------------|---|
| <i>circMTUS1</i> | miR-6515-5p                 | 2 |
| <i>circMTUS1</i> | miR-6516-3p                 | 1 |
| <i>circMTUS1</i> | miR-652-5p                  | 6 |
| <i>circMTUS1</i> | miR-653-5p                  | 5 |
| <i>circMTUS1</i> | miR-655-5p                  | 4 |
| <i>circMTUS1</i> | miR-658                     | 2 |
| <i>circMTUS1</i> | miR-670-3p                  | 1 |
| <i>circMTUS1</i> | miR-671-5p                  | 2 |
| <i>circMTUS1</i> | miR-6717-5p                 | 1 |
| <i>circMTUS1</i> | miR-6727-5p                 | 1 |
| <i>circMTUS1</i> | miR-6728-3p                 | 1 |
| <i>circMTUS1</i> | miR-6728-5p                 | 3 |
| <i>circMTUS1</i> | miR-6734-5p                 | 2 |
| <i>circMTUS1</i> | miR-6736-3p                 | 1 |
| <i>circMTUS1</i> | miR-6737-5p/6812-5p/6819-5p | 1 |
| <i>circMTUS1</i> | miR-6740-5p                 | 2 |
| <i>circMTUS1</i> | miR-6741-5p                 | 2 |
| <i>circMTUS1</i> | miR-6743-3p                 | 1 |
| <i>circMTUS1</i> | miR-6748-3p                 | 1 |
| <i>circMTUS1</i> | miR-6749-3p                 | 1 |
| <i>circMTUS1</i> | miR-6750-3p                 | 6 |
| <i>circMTUS1</i> | miR-6750-5p/6822-5p         | 1 |
| <i>circMTUS1</i> | miR-6752-5p/6842-5p/7110-5p | 1 |
| <i>circMTUS1</i> | miR-6753-5p                 | 2 |
| <i>circMTUS1</i> | miR-6757-3p                 | 2 |
| <i>circMTUS1</i> | miR-6757-5p                 | 2 |
| <i>circMTUS1</i> | miR-6758-5p/6856-5p         | 2 |
| <i>circMTUS1</i> | miR-676-3p                  | 4 |
| <i>circMTUS1</i> | miR-676-5p                  | 8 |
| <i>circMTUS1</i> | miR-6762-3p                 | 2 |
| <i>circMTUS1</i> | miR-6770-5p                 | 5 |
| <i>circMTUS1</i> | miR-6772-3p                 | 1 |
| <i>circMTUS1</i> | miR-6773-3p                 | 1 |
| <i>circMTUS1</i> | miR-6782-5p                 | 1 |
| <i>circMTUS1</i> | miR-6783-5p                 | 2 |
| <i>circMTUS1</i> | miR-6784-3p/6862-3p         | 2 |
| <i>circMTUS1</i> | miR-6792-5p                 | 4 |
| <i>circMTUS1</i> | miR-6795-3p                 | 2 |

|                  |             |   |
|------------------|-------------|---|
| <i>circMTUS1</i> | miR-6798-5p | 1 |
| <i>circMTUS1</i> | miR-6802-3p | 2 |
| <i>circMTUS1</i> | miR-6808-3p | 1 |
| <i>circMTUS1</i> | miR-6811-3p | 1 |
| <i>circMTUS1</i> | miR-6826-5p | 5 |
| <i>circMTUS1</i> | miR-6827-5p | 3 |
| <i>circMTUS1</i> | miR-6828-5p | 2 |
| <i>circMTUS1</i> | miR-6830-3p | 1 |
| <i>circMTUS1</i> | miR-6831-3p | 1 |
| <i>circMTUS1</i> | miR-6833-5p | 2 |
| <i>circMTUS1</i> | miR-6834-5p | 2 |
| <i>circMTUS1</i> | miR-6835-5p | 1 |
| <i>circMTUS1</i> | miR-6838-3p | 3 |
| <i>circMTUS1</i> | miR-6840-3p | 1 |
| <i>circMTUS1</i> | miR-6842-3p | 2 |
| <i>circMTUS1</i> | miR-6844    | 4 |
| <i>circMTUS1</i> | miR-6847-3p | 2 |
| <i>circMTUS1</i> | miR-6850-5p | 3 |
| <i>circMTUS1</i> | miR-6856-3p | 2 |
| <i>circMTUS1</i> | miR-6858-3p | 7 |
| <i>circMTUS1</i> | miR-6864-5p | 2 |
| <i>circMTUS1</i> | miR-6868-3p | 1 |
| <i>circMTUS1</i> | miR-6868-5p | 1 |
| <i>circMTUS1</i> | miR-6871-3p | 4 |
| <i>circMTUS1</i> | miR-6873-5p | 1 |
| <i>circMTUS1</i> | miR-6874-5p | 1 |
| <i>circMTUS1</i> | miR-6875-3p | 4 |
| <i>circMTUS1</i> | miR-6879-3p | 2 |
| <i>circMTUS1</i> | miR-6880-5p | 1 |
| <i>circMTUS1</i> | miR-6885-3p | 1 |
| <i>circMTUS1</i> | miR-6887-3p | 2 |
| <i>circMTUS1</i> | miR-6888-5p | 3 |
| <i>circMTUS1</i> | miR-6890-3p | 2 |
| <i>circMTUS1</i> | miR-6894-5p | 4 |
| <i>circMTUS1</i> | miR-6895-3p | 1 |
| <i>circMTUS1</i> | miR-7108-5p | 1 |
| <i>circMTUS1</i> | miR-7109-3p | 5 |
| <i>circMTUS1</i> | miR-7113-5p | 2 |

|                  |              |   |
|------------------|--------------|---|
| <i>circMTUS1</i> | miR-7114-5p  | 1 |
| <i>circMTUS1</i> | miR-7150     | 3 |
| <i>circMTUS1</i> | miR-7152-3p  | 2 |
| <i>circMTUS1</i> | miR-7152-5p  | 3 |
| <i>circMTUS1</i> | miR-7154-3p  | 4 |
| <i>circMTUS1</i> | miR-7155-5p  | 1 |
| <i>circMTUS1</i> | miR-7160-5p  | 2 |
| <i>circMTUS1</i> | miR-744-3p   | 2 |
| <i>circMTUS1</i> | miR-765      | 4 |
| <i>circMTUS1</i> | miR-766-5p   | 4 |
| <i>circMTUS1</i> | miR-7703     | 2 |
| <i>circMTUS1</i> | miR-7843-3p  | 2 |
| <i>circMTUS1</i> | miR-7844-5p  | 1 |
| <i>circMTUS1</i> | miR-7847-3p  | 2 |
| <i>circMTUS1</i> | miR-7848-3p  | 1 |
| <i>circMTUS1</i> | miR-7849-3p  | 2 |
| <i>circMTUS1</i> | miR-7850-5p  | 5 |
| <i>circMTUS1</i> | miR-7856-5p  | 5 |
| <i>circMTUS1</i> | miR-7974     | 2 |
| <i>circMTUS1</i> | miR-8053     | 1 |
| <i>circMTUS1</i> | miR-8060     | 2 |
| <i>circMTUS1</i> | miR-8062     | 5 |
| <i>circMTUS1</i> | miR-8063     | 4 |
| <i>circMTUS1</i> | miR-8069     | 2 |
| <i>circMTUS1</i> | miR-8071     | 1 |
| <i>circMTUS1</i> | miR-8077     | 2 |
| <i>circMTUS1</i> | miR-8078     | 2 |
| <i>circMTUS1</i> | miR-8083     | 1 |
| <i>circMTUS1</i> | miR-8084     | 1 |
| <i>circMTUS1</i> | miR-8087     | 2 |
| <i>circMTUS1</i> | miR-873-3p   | 4 |
| <i>circMTUS1</i> | miR-873-5p.1 | 4 |
| <i>circMTUS1</i> | miR-875-3p   | 8 |
| <i>circMTUS1</i> | miR-876-5p   | 3 |
| <i>circMTUS1</i> | miR-889-3p   | 2 |
| <i>circMTUS1</i> | miR-889-5p   | 2 |
| <i>circMTUS1</i> | miR-891a-3p  | 1 |
| <i>circMTUS1</i> | miR-892a     | 5 |

|                  |                    |   |
|------------------|--------------------|---|
| <i>circMTUS1</i> | miR-9-5p           | 2 |
| <i>circMTUS1</i> | miR-922            | 7 |
| <i>circMTUS1</i> | miR-924            | 1 |
| <i>circMTUS1</i> | miR-93-3p          | 3 |
| <i>circMTUS1</i> | miR-936            | 2 |
| <i>circMTUS1</i> | miR-937-5p         | 1 |
| <i>circMTUS1</i> | miR-943            | 3 |
| <i>circMTUS1</i> | miR-944            | 2 |
| <i>circMTUS1</i> | miR-9500           | 1 |
| <i>circMTUS1</i> | miR-96-5p/1271-5p  | 1 |
| <i>circMTUS1</i> | miR-101-5p         | 2 |
| <i>circMTUS1</i> | miR-105-5p         | 4 |
| <i>circMTUS1</i> | miR-1193           | 4 |
| <i>circMTUS1</i> | miR-1202/3972      | 2 |
| <i>circMTUS1</i> | miR-1207-3p        | 1 |
| <i>circMTUS1</i> | miR-1225-3p        | 1 |
| <i>circMTUS1</i> | miR-1226-3p        | 6 |
| <i>circMTUS1</i> | miR-1227-3p        | 2 |
| <i>circMTUS1</i> | miR-1227-5p        | 1 |
| <i>circMTUS1</i> | miR-1228-3p        | 1 |
| <i>circMTUS1</i> | miR-1236-3p        | 3 |
| <i>circMTUS1</i> | miR-1237-3p        | 3 |
| <i>circMTUS1</i> | miR-124-3p.1       | 2 |
| <i>circMTUS1</i> | miR-124-5p         | 4 |
| <i>circMTUS1</i> | miR-1245b-3p       | 8 |
| <i>circMTUS1</i> | miR-1245b-5p       | 1 |
| <i>circMTUS1</i> | miR-1246           | 2 |
| <i>circMTUS1</i> | miR-1248           | 3 |
| <i>circMTUS1</i> | miR-125-5p         | 2 |
| <i>circMTUS1</i> | miR-1255a/1255b-5p | 3 |
| <i>circMTUS1</i> | miR-125a-3p        | 2 |
| <i>circMTUS1</i> | miR-1261           | 1 |
| <i>circMTUS1</i> | miR-1264           | 2 |
| <i>circMTUS1</i> | miR-1265           | 3 |
| <i>circMTUS1</i> | miR-1270           | 4 |
| <i>circMTUS1</i> | miR-1273g-5p       | 3 |
| <i>circMTUS1</i> | miR-1273h-3p       | 4 |
| <i>circMTUS1</i> | miR-128-1-5p       | 1 |

|                  |                     |   |
|------------------|---------------------|---|
| <i>circMTUS1</i> | miR-1288-3p         | 2 |
| <i>circMTUS1</i> | miR-129-3p          | 2 |
| <i>circMTUS1</i> | miR-1294            | 1 |
| <i>circMTUS1</i> | miR-1296-3p         | 1 |
| <i>circMTUS1</i> | miR-1298-5p         | 4 |
| <i>circMTUS1</i> | miR-1301-3p         | 2 |
| <i>circMTUS1</i> | miR-1302/4298       | 2 |
| <i>circMTUS1</i> | miR-1305            | 3 |
| <i>circMTUS1</i> | miR-1306-5p         | 4 |
| <i>circMTUS1</i> | miR-1324            | 4 |
| <i>circMTUS1</i> | miR-133a-3p.2/133b  | 2 |
| <i>circMTUS1</i> | miR-135b-3p         | 2 |
| <i>circMTUS1</i> | miR-138-1-3p        | 1 |
| <i>circMTUS1</i> | miR-138-2-3p        | 2 |
| <i>circMTUS1</i> | miR-140-3p.2        | 2 |
| <i>circMTUS1</i> | miR-140-5p          | 3 |
| <i>circMTUS1</i> | miR-141-5p          | 1 |
| <i>circMTUS1</i> | miR-1468-5p         | 2 |
| <i>circMTUS1</i> | miR-146a-3p         | 3 |
| <i>circMTUS1</i> | miR-146b-3p         | 2 |
| <i>circMTUS1</i> | miR-147a            | 1 |
| <i>circMTUS1</i> | miR-148-3p/152-3p   | 3 |
| <i>circMTUS1</i> | miR-148b-5p/6874-3p | 5 |
| <i>circMTUS1</i> | miR-151-3p          | 3 |
| <i>circMTUS1</i> | miR-152-5p          | 1 |
| <i>circMTUS1</i> | miR-154-3p/487-3p   | 2 |
| <i>circMTUS1</i> | miR-154-5p          | 3 |
| <i>circMTUS1</i> | miR-1587/3620-5p    | 3 |
| <i>circMTUS1</i> | miR-181-3p/4420     | 2 |
| <i>circMTUS1</i> | miR-181-5p          | 2 |
| <i>circMTUS1</i> | miR-181a-3p         | 1 |
| <i>circMTUS1</i> | miR-1825            | 8 |
| <i>circMTUS1</i> | miR-183-5p.1        | 5 |
| <i>circMTUS1</i> | miR-187-5p          | 1 |
| <i>circMTUS1</i> | miR-1910-5p         | 3 |
| <i>circMTUS1</i> | miR-1911-3p         | 3 |
| <i>circMTUS1</i> | miR-1911-5p         | 2 |
| <i>circMTUS1</i> | miR-192-3p          | 3 |

|                  |                                     |   |
|------------------|-------------------------------------|---|
| <i>circMTUS1</i> | miR-192-5p/215-5p                   | 2 |
| <i>circMTUS1</i> | miR-194-3p                          | 1 |
| <i>circMTUS1</i> | miR-196-5p                          | 1 |
| <i>circMTUS1</i> | miR-197-3p                          | 5 |
| <i>circMTUS1</i> | miR-1972                            | 1 |
| <i>circMTUS1</i> | miR-198                             | 2 |
| <i>circMTUS1</i> | miR-199-5p                          | 8 |
| <i>circMTUS1</i> | miR-200ab-5p                        | 3 |
| <i>circMTUS1</i> | miR-200c-5p/550a-3p                 | 2 |
| <i>circMTUS1</i> | miR-203a-3p.1                       | 6 |
| <i>circMTUS1</i> | miR-203a-5p                         | 3 |
| <i>circMTUS1</i> | miR-203b-3p                         | 4 |
| <i>circMTUS1</i> | miR-205-5p                          | 2 |
| <i>circMTUS1</i> | miR-208-3p                          | 1 |
| <i>circMTUS1</i> | miR-20b-3p                          | 2 |
| <i>circMTUS1</i> | miR-21-3p/3591-3p                   | 6 |
| <i>circMTUS1</i> | miR-2114-5p                         | 2 |
| <i>circMTUS1</i> | miR-2116-5p                         | 6 |
| <i>circMTUS1</i> | miR-2117                            | 1 |
| <i>circMTUS1</i> | miR-218-5p                          | 3 |
| <i>circMTUS1</i> | miR-219a-2-3p                       | 8 |
| <i>circMTUS1</i> | miR-219b-3p                         | 8 |
| <i>circMTUS1</i> | miR-22-5p                           | 6 |
| <i>circMTUS1</i> | miR-223-3p                          | 3 |
| <i>circMTUS1</i> | miR-224-5p                          | 3 |
| <i>circMTUS1</i> | miR-2276-5p                         | 3 |
| <i>circMTUS1</i> | miR-23-3p                           | 1 |
| <i>circMTUS1</i> | miR-2355-5p                         | 2 |
| <i>circMTUS1</i> | miR-2467-3p                         | 3 |
| <i>circMTUS1</i> | miR-25-3p/32-5p/92-3p/363-3p/367-3p | 3 |
| <i>circMTUS1</i> | miR-25-5p                           | 1 |
| <i>circMTUS1</i> | miR-26-3p                           | 4 |
| <i>circMTUS1</i> | miR-26-5p                           | 3 |
| <i>circMTUS1</i> | miR-2681-3p                         | 1 |
| <i>circMTUS1</i> | miR-27-3p                           | 2 |
| <i>circMTUS1</i> | miR-27a-5p                          | 2 |
| <i>circMTUS1</i> | miR-296-3p                          | 2 |
| <i>circMTUS1</i> | miR-296-5p                          | 1 |

|                  |                           |    |
|------------------|---------------------------|----|
| <i>circMTUS1</i> | miR-299-3p                | 1  |
| <i>circMTUS1</i> | miR-30-5p                 | 2  |
| <i>circMTUS1</i> | miR-302a-5p               | 2  |
| <i>circMTUS1</i> | miR-302b-5p/302d-5p       | 4  |
| <i>circMTUS1</i> | miR-302f                  | 3  |
| <i>circMTUS1</i> | miR-3122/3913-5p          | 4  |
| <i>circMTUS1</i> | miR-3123                  | 2  |
| <i>circMTUS1</i> | miR-3125/3916/6859-5p     | 1  |
| <i>circMTUS1</i> | miR-3127-5p               | 3  |
| <i>circMTUS1</i> | miR-3134                  | 5  |
| <i>circMTUS1</i> | miR-3137                  | 2  |
| <i>circMTUS1</i> | miR-3140-5p               | 2  |
| <i>circMTUS1</i> | miR-3151-3p               | 1  |
| <i>circMTUS1</i> | miR-3151-5p               | 1  |
| <i>circMTUS1</i> | miR-3154                  | 4  |
| <i>circMTUS1</i> | miR-3156-5p               | 3  |
| <i>circMTUS1</i> | miR-3157-3p               | 2  |
| <i>circMTUS1</i> | miR-3157-5p               | 3  |
| <i>circMTUS1</i> | miR-3161                  | 12 |
| <i>circMTUS1</i> | miR-3166                  | 4  |
| <i>circMTUS1</i> | miR-3168                  | 5  |
| <i>circMTUS1</i> | miR-3173-5p               | 2  |
| <i>circMTUS1</i> | miR-3179                  | 4  |
| <i>circMTUS1</i> | miR-3183/4723-3p/6769b-3p | 3  |
| <i>circMTUS1</i> | miR-3184-3p               | 2  |
| <i>circMTUS1</i> | miR-3185                  | 6  |
| <i>circMTUS1</i> | miR-3186-5p               | 1  |
| <i>circMTUS1</i> | miR-3191-5p               | 1  |
| <i>circMTUS1</i> | miR-3197                  | 1  |
| <i>circMTUS1</i> | miR-32-3p                 | 1  |
| <i>circMTUS1</i> | miR-320                   | 1  |
| <i>circMTUS1</i> | miR-3200-5p               | 4  |
| <i>circMTUS1</i> | miR-323a-5p               | 3  |
| <i>circMTUS1</i> | miR-323b-3p               | 4  |
| <i>circMTUS1</i> | miR-329-3p/362-3p         | 2  |
| <i>circMTUS1</i> | miR-33-5p                 | 2  |
| <i>circMTUS1</i> | miR-331-3p                | 1  |
| <i>circMTUS1</i> | miR-331-5p                | 2  |



|                  |                                   |   |
|------------------|-----------------------------------|---|
| <i>circMTUS1</i> | miR-335-5p                        | 7 |
| <i>circMTUS1</i> | miR-337-3p                        | 3 |
| <i>circMTUS1</i> | miR-338-5p                        | 1 |
| <i>circMTUS1</i> | miR-339-5p                        | 3 |
| <i>circMTUS1</i> | miR-33a-3p                        | 2 |
| <i>circMTUS1</i> | miR-345-3p                        | 2 |
| <i>circMTUS1</i> | miR-346                           | 1 |
| <i>circMTUS1</i> | miR-3529-3p                       | 9 |
| <i>circMTUS1</i> | miR-3606-5p                       | 2 |
| <i>circMTUS1</i> | miR-3611                          | 5 |
| <i>circMTUS1</i> | miR-3616-3p                       | 3 |
| <i>circMTUS1</i> | miR-3622a-3p/3622b-3p             | 2 |
| <i>circMTUS1</i> | miR-3622b-5p                      | 2 |
| <i>circMTUS1</i> | miR-3653-3p                       | 2 |
| <i>circMTUS1</i> | miR-3657                          | 5 |
| <i>circMTUS1</i> | miR-3659                          | 1 |
| <i>circMTUS1</i> | miR-3662                          | 9 |
| <i>circMTUS1</i> | miR-3665                          | 2 |
| <i>circMTUS1</i> | miR-3667-3p                       | 1 |
| <i>circMTUS1</i> | miR-3667-5p                       | 2 |
| <i>circMTUS1</i> | miR-3670                          | 2 |
| <i>circMTUS1</i> | miR-3674                          | 2 |
| <i>circMTUS1</i> | miR-3678-3p                       | 4 |
| <i>circMTUS1</i> | miR-3681-5p                       | 4 |
| <i>circMTUS1</i> | miR-3682-3p                       | 8 |
| <i>circMTUS1</i> | miR-3688-3p                       | 9 |
| <i>circMTUS1</i> | miR-3689a-5p/3689b-5p/3689e/3689f | 4 |
| <i>circMTUS1</i> | miR-3691-3p                       | 1 |
| <i>circMTUS1</i> | miR-3691-5p                       | 1 |
| <i>circMTUS1</i> | miR-3692-3p                       | 1 |
| <i>circMTUS1</i> | miR-3714                          | 2 |
| <i>circMTUS1</i> | miR-374b-3p                       | 2 |
| <i>circMTUS1</i> | miR-374c-3p                       | 1 |
| <i>circMTUS1</i> | miR-376b-5p/376c-5p               | 1 |
| <i>circMTUS1</i> | miR-380-5p/563                    | 3 |
| <i>circMTUS1</i> | miR-381-3p                        | 3 |
| <i>circMTUS1</i> | miR-382-3p                        | 3 |
| <i>circMTUS1</i> | miR-383-5p.1                      | 2 |

|                  |                     |    |
|------------------|---------------------|----|
| <i>circMTUS1</i> | miR-383-5p.2        | 3  |
| <i>circMTUS1</i> | miR-3910            | 2  |
| <i>circMTUS1</i> | miR-3913-3p         | 3  |
| <i>circMTUS1</i> | miR-3923            | 2  |
| <i>circMTUS1</i> | miR-3925-5p         | 2  |
| <i>circMTUS1</i> | miR-3926            | 2  |
| <i>circMTUS1</i> | miR-3927-3p/6831-5p | 1  |
| <i>circMTUS1</i> | miR-3928-5p/6806-3p | 2  |
| <i>circMTUS1</i> | miR-3934-5p         | 2  |
| <i>circMTUS1</i> | miR-3937            | 2  |
| <i>circMTUS1</i> | miR-3938            | 2  |
| <i>circMTUS1</i> | miR-3940-3p         | 2  |
| <i>circMTUS1</i> | miR-3944-5p         | 3  |
| <i>circMTUS1</i> | miR-3973            | 5  |
| <i>circMTUS1</i> | miR-3974            | 4  |
| <i>circMTUS1</i> | miR-3976            | 1  |
| <i>circMTUS1</i> | miR-409-3p          | 2  |
| <i>circMTUS1</i> | miR-409-5p          | 3  |
| <i>circMTUS1</i> | miR-412-3p/6754-3p  | 2  |
| <i>circMTUS1</i> | miR-421             | 4  |
| <i>circMTUS1</i> | miR-424-3p          | 4  |
| <i>circMTUS1</i> | miR-4251            | 6  |
| <i>circMTUS1</i> | miR-4255            | 3  |
| <i>circMTUS1</i> | miR-4256            | 2  |
| <i>circMTUS1</i> | miR-4257            | 4  |
| <i>circMTUS1</i> | miR-4258            | 2  |
| <i>circMTUS1</i> | miR-4259            | 2  |
| <i>circMTUS1</i> | miR-4266            | 1  |
| <i>circMTUS1</i> | miR-4269/6715b-5p   | 2  |
| <i>circMTUS1</i> | miR-4273/7156-5p    | 1  |
| <i>circMTUS1</i> | miR-4277            | 3  |
| <i>circMTUS1</i> | miR-4287/4685-3p    | 2  |
| <i>circMTUS1</i> | miR-4291            | 4  |
| <i>circMTUS1</i> | miR-4297/5581-5p    | 2  |
| <i>circMTUS1</i> | miR-4299            | 2  |
| <i>circMTUS1</i> | miR-4302            | 10 |
| <i>circMTUS1</i> | miR-4303            | 2  |
| <i>circMTUS1</i> | miR-4307            | 2  |

|                  |                  |    |
|------------------|------------------|----|
| <i>circMTUS1</i> | miR-431-5p       | 2  |
| <i>circMTUS1</i> | miR-4313         | 1  |
| <i>circMTUS1</i> | miR-4316         | 1  |
| <i>circMTUS1</i> | miR-4329         | 6  |
| <i>circMTUS1</i> | miR-433-3p       | 2  |
| <i>circMTUS1</i> | miR-4330         | 3  |
| <i>circMTUS1</i> | miR-4417         | 2  |
| <i>circMTUS1</i> | miR-4436b-5p     | 1  |
| <i>circMTUS1</i> | miR-4438         | 2  |
| <i>circMTUS1</i> | miR-4447/4472    | 1  |
| <i>circMTUS1</i> | miR-4455         | 3  |
| <i>circMTUS1</i> | miR-4456         | 2  |
| <i>circMTUS1</i> | miR-4457         | 4  |
| <i>circMTUS1</i> | miR-4463         | 5  |
| <i>circMTUS1</i> | miR-4468         | 4  |
| <i>circMTUS1</i> | miR-4469         | 2  |
| <i>circMTUS1</i> | miR-4470         | 1  |
| <i>circMTUS1</i> | miR-4477b        | 3  |
| <i>circMTUS1</i> | miR-4482-3p      | 2  |
| <i>circMTUS1</i> | miR-4484         | 2  |
| <i>circMTUS1</i> | miR-4491/4657    | 1  |
| <i>circMTUS1</i> | miR-4494         | 2  |
| <i>circMTUS1</i> | miR-4499         | 5  |
| <i>circMTUS1</i> | miR-4504         | 1  |
| <i>circMTUS1</i> | miR-4506         | 4  |
| <i>circMTUS1</i> | miR-450a-1-3p    | 4  |
| <i>circMTUS1</i> | miR-4511         | 2  |
| <i>circMTUS1</i> | miR-4512         | 1  |
| <i>circMTUS1</i> | miR-4513/6855-3p | 10 |
| <i>circMTUS1</i> | miR-4514/4692    | 2  |
| <i>circMTUS1</i> | miR-4515         | 2  |
| <i>circMTUS1</i> | miR-4520-3p      | 1  |
| <i>circMTUS1</i> | miR-4520-5p      | 2  |
| <i>circMTUS1</i> | miR-4523         | 2  |
| <i>circMTUS1</i> | miR-4524a-3p     | 4  |
| <i>circMTUS1</i> | miR-4524b-3p     | 5  |
| <i>circMTUS1</i> | miR-4531         | 4  |
| <i>circMTUS1</i> | miR-4534/8082    | 5  |

|                  |                       |    |
|------------------|-----------------------|----|
| <i>circMTUS1</i> | miR-4537              | 1  |
| <i>circMTUS1</i> | miR-4539              | 2  |
| <i>circMTUS1</i> | miR-455-3p.1          | 3  |
| <i>circMTUS1</i> | miR-455-5p            | 2  |
| <i>circMTUS1</i> | miR-4637              | 3  |
| <i>circMTUS1</i> | miR-4640-5p           | 3  |
| <i>circMTUS1</i> | miR-4642              | 2  |
| <i>circMTUS1</i> | miR-4645-3p           | 4  |
| <i>circMTUS1</i> | miR-4645-5p/4673      | 3  |
| <i>circMTUS1</i> | miR-4650-5p           | 1  |
| <i>circMTUS1</i> | miR-4652-3p           | 2  |
| <i>circMTUS1</i> | miR-4655-5p           | 2  |
| <i>circMTUS1</i> | miR-4659a-5p/4659b-5p | 2  |
| <i>circMTUS1</i> | miR-466               | 1  |
| <i>circMTUS1</i> | miR-4661-5p           | 2  |
| <i>circMTUS1</i> | miR-4666a-3p          | 3  |
| <i>circMTUS1</i> | miR-4669              | 5  |
| <i>circMTUS1</i> | miR-4670-5p           | 2  |
| <i>circMTUS1</i> | miR-4674              | 3  |
| <i>circMTUS1</i> | miR-4677-3p           | 3  |
| <i>circMTUS1</i> | miR-4677-5p           | 1  |
| <i>circMTUS1</i> | miR-4679              | 3  |
| <i>circMTUS1</i> | miR-4684-3p           | 2  |
| <i>circMTUS1</i> | miR-4686              | 4  |
| <i>circMTUS1</i> | miR-4687-5p           | 2  |
| <i>circMTUS1</i> | miR-4690-3p/5685      | 2  |
| <i>circMTUS1</i> | miR-4690-5p           | 2  |
| <i>circMTUS1</i> | miR-4691-3p           | 3  |
| <i>circMTUS1</i> | miR-4694-3p           | 11 |
| <i>circMTUS1</i> | miR-4696              | 1  |
| <i>circMTUS1</i> | miR-4697-3p           | 3  |
| <i>circMTUS1</i> | miR-4699-5p           | 7  |
| <i>circMTUS1</i> | miR-4703-3p           | 2  |
| <i>circMTUS1</i> | miR-4705              | 2  |
| <i>circMTUS1</i> | miR-4707-3p           | 2  |
| <i>circMTUS1</i> | miR-4709-3p           | 5  |
| <i>circMTUS1</i> | miR-4715-3p           | 1  |
| <i>circMTUS1</i> | miR-4715-5p           | 2  |

|                  |                     |   |
|------------------|---------------------|---|
| <i>circMTUS1</i> | miR-4717-3p         | 3 |
| <i>circMTUS1</i> | miR-4721            | 3 |
| <i>circMTUS1</i> | miR-4722-3p/6727-3p | 1 |
| <i>circMTUS1</i> | miR-4724-5p         | 7 |
| <i>circMTUS1</i> | miR-4725-5p         | 4 |
| <i>circMTUS1</i> | miR-4727-5p         | 6 |
| <i>circMTUS1</i> | miR-4728-3p         | 2 |
| <i>circMTUS1</i> | miR-4731-3p/4801    | 7 |
| <i>circMTUS1</i> | miR-4732-3p         | 2 |
| <i>circMTUS1</i> | miR-4733-3p         | 6 |
| <i>circMTUS1</i> | miR-4733-5p         | 3 |
| <i>circMTUS1</i> | miR-4737            | 2 |
| <i>circMTUS1</i> | miR-4740-5p         | 2 |
| <i>circMTUS1</i> | miR-4742-5p         | 2 |
| <i>circMTUS1</i> | miR-4743-3p         | 2 |
| <i>circMTUS1</i> | miR-4750-3p         | 4 |
| <i>circMTUS1</i> | miR-4755-3p         | 4 |
| <i>circMTUS1</i> | miR-4760-5p/8061    | 2 |
| <i>circMTUS1</i> | miR-4762-3p         | 4 |
| <i>circMTUS1</i> | miR-4763-5p         | 1 |
| <i>circMTUS1</i> | miR-4764-3p         | 2 |
| <i>circMTUS1</i> | miR-4768-5p/6833-3p | 1 |
| <i>circMTUS1</i> | miR-4769-3p/6817-5p | 5 |
| <i>circMTUS1</i> | miR-4771            | 4 |
| <i>circMTUS1</i> | miR-4772-5p         | 2 |
| <i>circMTUS1</i> | miR-4773            | 4 |
| <i>circMTUS1</i> | miR-4777-3p         | 2 |
| <i>circMTUS1</i> | miR-4777-5p         | 2 |
| <i>circMTUS1</i> | miR-4778-3p         | 4 |
| <i>circMTUS1</i> | miR-4778-5p         | 6 |
| <i>circMTUS1</i> | miR-4781-3p         | 2 |
| <i>circMTUS1</i> | miR-4786-5p         | 2 |
| <i>circMTUS1</i> | miR-4803            | 2 |
| <i>circMTUS1</i> | miR-483-5p          | 1 |
| <i>circMTUS1</i> | miR-488-5p          | 3 |
| <i>circMTUS1</i> | miR-489-3p          | 4 |
| <i>circMTUS1</i> | miR-490-3p          | 2 |
| <i>circMTUS1</i> | miR-490-5p          | 2 |

|                  |                             |    |
|------------------|-----------------------------|----|
| <i>circMTUS1</i> | miR-491-5p                  | 1  |
| <i>circMTUS1</i> | miR-497-3p                  | 3  |
| <i>circMTUS1</i> | miR-498                     | 4  |
| <i>circMTUS1</i> | miR-499a-3p/499b-3p         | 1  |
| <i>circMTUS1</i> | miR-499a-5p                 | 1  |
| <i>circMTUS1</i> | miR-499b-5p                 | 2  |
| <i>circMTUS1</i> | miR-5000-3p                 | 2  |
| <i>circMTUS1</i> | miR-5001-3p                 | 6  |
| <i>circMTUS1</i> | miR-5003-3p                 | 2  |
| <i>circMTUS1</i> | miR-5003-5p                 | 2  |
| <i>circMTUS1</i> | miR-5006-5p                 | 2  |
| <i>circMTUS1</i> | miR-5007-5p                 | 1  |
| <i>circMTUS1</i> | miR-5008-3p/6737-3p/7157-3p | 6  |
| <i>circMTUS1</i> | miR-500a-3p                 | 1  |
| <i>circMTUS1</i> | miR-5011-5p                 | 1  |
| <i>circMTUS1</i> | miR-505-3p.1                | 2  |
| <i>circMTUS1</i> | miR-505-3p.2                | 4  |
| <i>circMTUS1</i> | miR-506-5p                  | 6  |
| <i>circMTUS1</i> | miR-5087                    | 1  |
| <i>circMTUS1</i> | miR-5091                    | 2  |
| <i>circMTUS1</i> | miR-5095/7151-3p            | 2  |
| <i>circMTUS1</i> | miR-5096                    | 2  |
| <i>circMTUS1</i> | miR-5100                    | 4  |
| <i>circMTUS1</i> | miR-513a-5p                 | 2  |
| <i>circMTUS1</i> | miR-513b-3p                 | 2  |
| <i>circMTUS1</i> | miR-513b-5p                 | 2  |
| <i>circMTUS1</i> | miR-515-5p/519e-5p          | 2  |
| <i>circMTUS1</i> | miR-5186                    | 3  |
| <i>circMTUS1</i> | miR-5187-5p                 | 2  |
| <i>circMTUS1</i> | miR-5188                    | 1  |
| <i>circMTUS1</i> | miR-5189-3p                 | 3  |
| <i>circMTUS1</i> | miR-518d-5p/519-5p          | 2  |
| <i>circMTUS1</i> | miR-5197-3p                 | 11 |
| <i>circMTUS1</i> | miR-5197-5p                 | 3  |
| <i>circMTUS1</i> | miR-520g-3p                 | 5  |
| <i>circMTUS1</i> | miR-520g-5p                 | 2  |
| <i>circMTUS1</i> | miR-522-3p                  | 11 |
| <i>circMTUS1</i> | miR-532-5p                  | 1  |

|                  |              |   |
|------------------|--------------|---|
| <i>circMTUS1</i> | miR-539-3p   | 4 |
| <i>circMTUS1</i> | miR-542-3p   | 1 |
| <i>circMTUS1</i> | miR-543      | 3 |
| <i>circMTUS1</i> | miR-544a     | 7 |
| <i>circMTUS1</i> | miR-545-3p   | 4 |
| <i>circMTUS1</i> | miR-548ad-3p | 4 |
| <i>circMTUS1</i> | miR-548an    | 2 |
| <i>circMTUS1</i> | miR-548ao-3p | 2 |
| <i>circMTUS1</i> | miR-548b-3p  | 2 |
| <i>circMTUS1</i> | miR-548e-5p  | 3 |
| <i>circMTUS1</i> | miR-548m     | 6 |
| <i>circMTUS1</i> | miR-548p     | 2 |
| <i>circMTUS1</i> | miR-548q     | 2 |
| <i>circMTUS1</i> | miR-549a     | 2 |
| <i>circMTUS1</i> | miR-555      | 2 |
| <i>circMTUS1</i> | miR-5571-3p  | 2 |
| <i>circMTUS1</i> | miR-5579-3p  | 1 |
| <i>circMTUS1</i> | miR-5584-3p  | 5 |
| <i>circMTUS1</i> | miR-5585-3p  | 2 |
| <i>circMTUS1</i> | miR-5587-5p  | 4 |
| <i>circMTUS1</i> | miR-5588-3p  | 2 |
| <i>circMTUS1</i> | miR-5590-5p  | 2 |
| <i>circMTUS1</i> | miR-5591-3p  | 2 |
| <i>circMTUS1</i> | miR-5681a    | 4 |
| <i>circMTUS1</i> | miR-5682     | 2 |
| <i>circMTUS1</i> | miR-5683     | 2 |
| <i>circMTUS1</i> | miR-5687     | 2 |
| <i>circMTUS1</i> | miR-5693     | 1 |
| <i>circMTUS1</i> | miR-5694     | 3 |
| <i>circMTUS1</i> | miR-5697     | 1 |
| <i>circMTUS1</i> | miR-5701     | 2 |
| <i>circMTUS1</i> | miR-5702     | 1 |
| <i>circMTUS1</i> | miR-5739     | 2 |
| <i>circMTUS1</i> | miR-574-5p   | 1 |
| <i>circMTUS1</i> | miR-576-3p   | 2 |
| <i>circMTUS1</i> | miR-580-5p   | 4 |
| <i>circMTUS1</i> | miR-582-3p   | 4 |
| <i>circMTUS1</i> | miR-584-3p   | 2 |

|                  |                  |    |
|------------------|------------------|----|
| <i>circMTUS1</i> | miR-584-5p       | 3  |
| <i>circMTUS1</i> | miR-585-5p       | 2  |
| <i>circMTUS1</i> | miR-586          | 5  |
| <i>circMTUS1</i> | miR-587          | 1  |
| <i>circMTUS1</i> | miR-589-3p       | 2  |
| <i>circMTUS1</i> | miR-591          | 3  |
| <i>circMTUS1</i> | miR-593-5p       | 2  |
| <i>circMTUS1</i> | miR-597-3p       | 1  |
| <i>circMTUS1</i> | miR-600          | 2  |
| <i>circMTUS1</i> | miR-603          | 2  |
| <i>circMTUS1</i> | miR-606          | 1  |
| <i>circMTUS1</i> | miR-6071         | 1  |
| <i>circMTUS1</i> | miR-6072/6891-3p | 4  |
| <i>circMTUS1</i> | miR-6077         | 2  |
| <i>circMTUS1</i> | miR-6079         | 5  |
| <i>circMTUS1</i> | miR-6087         | 1  |
| <i>circMTUS1</i> | miR-609          | 3  |
| <i>circMTUS1</i> | miR-610          | 1  |
| <i>circMTUS1</i> | miR-6165         | 2  |
| <i>circMTUS1</i> | miR-618          | 3  |
| <i>circMTUS1</i> | miR-624-3p       | 2  |
| <i>circMTUS1</i> | miR-627-3p       | 2  |
| <i>circMTUS1</i> | miR-628-5p       | 6  |
| <i>circMTUS1</i> | miR-635/6774-5p  | 2  |
| <i>circMTUS1</i> | miR-641/3617-5p  | 10 |
| <i>circMTUS1</i> | miR-642-3p       | 6  |
| <i>circMTUS1</i> | miR-642b-5p      | 2  |
| <i>circMTUS1</i> | miR-643          | 2  |
| <i>circMTUS1</i> | miR-648          | 4  |
| <i>circMTUS1</i> | miR-649          | 2  |
| <i>circMTUS1</i> | miR-6499-3p      | 5  |
| <i>circMTUS1</i> | miR-6506-3p      | 1  |
| <i>circMTUS1</i> | miR-6507-5p      | 2  |
| <i>circMTUS1</i> | miR-6508-3p      | 3  |
| <i>circMTUS1</i> | miR-6508-5p/8067 | 6  |
| <i>circMTUS1</i> | miR-6509-3p      | 1  |
| <i>circMTUS1</i> | miR-651-3p       | 7  |
| <i>circMTUS1</i> | miR-651-5p       | 2  |



|                  |                     |    |
|------------------|---------------------|----|
| <i>circMTUS1</i> | miR-6510-5p         | 2  |
| <i>circMTUS1</i> | miR-6511-5p         | 1  |
| <i>circMTUS1</i> | miR-6512-5p         | 3  |
| <i>circMTUS1</i> | miR-6513-3p         | 2  |
| <i>circMTUS1</i> | miR-6513-5p         | 4  |
| <i>circMTUS1</i> | miR-6515-3p         | 3  |
| <i>circMTUS1</i> | miR-6516-5p         | 2  |
| <i>circMTUS1</i> | miR-653-3p          | 2  |
| <i>circMTUS1</i> | miR-654-3p          | 2  |
| <i>circMTUS1</i> | miR-654-5p          | 2  |
| <i>circMTUS1</i> | miR-657             | 2  |
| <i>circMTUS1</i> | miR-668-3p          | 2  |
| <i>circMTUS1</i> | miR-670-5p          | 2  |
| <i>circMTUS1</i> | miR-6715a-3p        | 3  |
| <i>circMTUS1</i> | miR-6720-5p         | 1  |
| <i>circMTUS1</i> | miR-6724-5p/6773-5p | 2  |
| <i>circMTUS1</i> | miR-6730-5p         | 4  |
| <i>circMTUS1</i> | miR-6731-3p         | 4  |
| <i>circMTUS1</i> | miR-6732-3p         | 1  |
| <i>circMTUS1</i> | miR-6733-3p         | 10 |
| <i>circMTUS1</i> | miR-6734-3p         | 1  |
| <i>circMTUS1</i> | miR-6735-3p         | 1  |
| <i>circMTUS1</i> | miR-6738-3p         | 7  |
| <i>circMTUS1</i> | miR-6740-3p         | 2  |
| <i>circMTUS1</i> | miR-6742-3p         | 1  |
| <i>circMTUS1</i> | miR-6742-5p         | 1  |
| <i>circMTUS1</i> | miR-6744-5p         | 3  |
| <i>circMTUS1</i> | miR-6747-3p         | 1  |
| <i>circMTUS1</i> | miR-6752-3p         | 3  |
| <i>circMTUS1</i> | miR-6755-3p         | 2  |
| <i>circMTUS1</i> | miR-6755-5p         | 2  |
| <i>circMTUS1</i> | miR-6758-3p         | 7  |
| <i>circMTUS1</i> | miR-6761-5p         | 6  |
| <i>circMTUS1</i> | miR-6762-5p/6845-5p | 1  |
| <i>circMTUS1</i> | miR-6765-3p         | 2  |
| <i>circMTUS1</i> | miR-6765-5p         | 2  |
| <i>circMTUS1</i> | miR-6768-3p         | 2  |
| <i>circMTUS1</i> | miR-6768-5p         | 7  |

|                  |                       |    |
|------------------|-----------------------|----|
| <i>circMTUS1</i> | miR-6769a-5p/6769b-5p | 2  |
| <i>circMTUS1</i> | miR-6771-3p           | 3  |
| <i>circMTUS1</i> | miR-6772-5p           | 3  |
| <i>circMTUS1</i> | miR-6776-3p           | 2  |
| <i>circMTUS1</i> | miR-6779-3p           | 2  |
| <i>circMTUS1</i> | miR-6782-3p           | 6  |
| <i>circMTUS1</i> | miR-6787-3p           | 4  |
| <i>circMTUS1</i> | miR-6790-3p           | 2  |
| <i>circMTUS1</i> | miR-6793-3p           | 4  |
| <i>circMTUS1</i> | miR-6796-3p           | 2  |
| <i>circMTUS1</i> | miR-6798-3p           | 2  |
| <i>circMTUS1</i> | miR-6801-3p/6810-3p   | 1  |
| <i>circMTUS1</i> | miR-6804-3p           | 3  |
| <i>circMTUS1</i> | miR-6807-5p           | 1  |
| <i>circMTUS1</i> | miR-6809-3p           | 1  |
| <i>circMTUS1</i> | miR-6814-5p           | 3  |
| <i>circMTUS1</i> | miR-6815-5p/6865-5p   | 2  |
| <i>circMTUS1</i> | miR-6818-5p           | 1  |
| <i>circMTUS1</i> | miR-6821-3p           | 2  |
| <i>circMTUS1</i> | miR-6822-3p           | 1  |
| <i>circMTUS1</i> | miR-6823-5p           | 5  |
| <i>circMTUS1</i> | miR-6828-3p           | 1  |
| <i>circMTUS1</i> | miR-6830-5p           | 2  |
| <i>circMTUS1</i> | miR-6832-3p           | 2  |
| <i>circMTUS1</i> | miR-6836-3p           | 2  |
| <i>circMTUS1</i> | miR-6837-3p           | 2  |
| <i>circMTUS1</i> | miR-6841-5p           | 2  |
| <i>circMTUS1</i> | miR-6843-3p/6848-3p   | 2  |
| <i>circMTUS1</i> | miR-6847-5p           | 4  |
| <i>circMTUS1</i> | miR-6852-5p           | 1  |
| <i>circMTUS1</i> | miR-6854-5p           | 4  |
| <i>circMTUS1</i> | miR-6857-3p           | 10 |
| <i>circMTUS1</i> | miR-6865-3p           | 5  |
| <i>circMTUS1</i> | miR-6867-5p           | 2  |
| <i>circMTUS1</i> | miR-6869-5p           | 2  |
| <i>circMTUS1</i> | miR-6870-3p           | 4  |
| <i>circMTUS1</i> | miR-6871-5p           | 2  |
| <i>circMTUS1</i> | miR-6883-3p           | 1  |

|                  |             |   |
|------------------|-------------|---|
| <i>circMTUS1</i> | miR-6884-3p | 1 |
| <i>circMTUS1</i> | miR-6886-3p | 2 |
| <i>circMTUS1</i> | miR-6888-3p | 1 |
| <i>circMTUS1</i> | miR-6889-3p | 6 |
| <i>circMTUS1</i> | miR-6892-3p | 3 |
| <i>circMTUS1</i> | miR-6895-5p | 1 |
| <i>circMTUS1</i> | miR-7-3p    | 6 |
| <i>circMTUS1</i> | miR-7-5p    | 2 |
| <i>circMTUS1</i> | miR-7108-3p | 2 |
| <i>circMTUS1</i> | miR-7113-3p | 2 |
| <i>circMTUS1</i> | miR-7154-5p | 2 |
| <i>circMTUS1</i> | miR-7156-3p | 2 |
| <i>circMTUS1</i> | miR-7158-3p | 4 |
| <i>circMTUS1</i> | miR-7158-5p | 2 |
| <i>circMTUS1</i> | miR-7159-3p | 2 |
| <i>circMTUS1</i> | miR-7159-5p | 4 |
| <i>circMTUS1</i> | miR-7160-3p | 1 |
| <i>circMTUS1</i> | miR-7161-3p | 2 |
| <i>circMTUS1</i> | miR-7515    | 4 |
| <i>circMTUS1</i> | miR-758-5p  | 3 |
| <i>circMTUS1</i> | miR-759     | 1 |
| <i>circMTUS1</i> | miR-760     | 1 |
| <i>circMTUS1</i> | miR-767-3p  | 1 |
| <i>circMTUS1</i> | miR-769-5p  | 2 |
| <i>circMTUS1</i> | miR-7702    | 3 |
| <i>circMTUS1</i> | miR-7705    | 1 |
| <i>circMTUS1</i> | miR-7706    | 2 |
| <i>circMTUS1</i> | miR-7855-5p | 3 |
| <i>circMTUS1</i> | miR-7975    | 2 |
| <i>circMTUS1</i> | miR-7976    | 2 |
| <i>circMTUS1</i> | miR-7977    | 1 |
| <i>circMTUS1</i> | miR-7978    | 2 |
| <i>circMTUS1</i> | miR-8055    | 2 |
| <i>circMTUS1</i> | miR-8056    | 1 |
| <i>circMTUS1</i> | miR-8065    | 2 |
| <i>circMTUS1</i> | miR-8070    | 1 |
| <i>circMTUS1</i> | miR-8075    | 1 |
| <i>circMTUS1</i> | miR-8076    | 3 |

|                   |                          |   |
|-------------------|--------------------------|---|
| <i>circMTUS1</i>  | miR-8485                 | 2 |
| <i>circMTUS1</i>  | miR-874-3p               | 2 |
| <i>circMTUS1</i>  | miR-874-5p               | 1 |
| <i>circMTUS1</i>  | miR-875-5p               | 2 |
| <i>circMTUS1</i>  | miR-876-3p               | 3 |
| <i>circMTUS1</i>  | miR-887-5p               | 4 |
| <i>circMTUS1</i>  | miR-888-3p               | 5 |
| <i>circMTUS1</i>  | miR-890                  | 3 |
| <i>circMTUS1</i>  | miR-892-5p               | 6 |
| <i>circMTUS1</i>  | miR-892b                 | 6 |
| <i>circMTUS1</i>  | miR-921                  | 2 |
| <i>circMTUS1</i>  | miR-92a-2-5p             | 2 |
| <i>circMTUS1</i>  | miR-935                  | 7 |
| <i>circMTUS1</i>  | miR-938                  | 2 |
| <i>circMTUS1</i>  | miR-939-3p               | 1 |
| <i>circMTUS1</i>  | miR-942-5p               | 1 |
| <i>circMTUS1</i>  | miR-96-3p                | 1 |
| <i>circMTUS1</i>  | miR-99-3p                | 2 |
| <i>circMVB12B</i> | miR-103a-2-5p            | 3 |
| <i>circMVB12B</i> | miR-103b                 | 1 |
| <i>circMVB12B</i> | miR-1193                 | 1 |
| <i>circMVB12B</i> | miR-1200                 | 3 |
| <i>circMVB12B</i> | miR-1207-3p              | 5 |
| <i>circMVB12B</i> | miR-1228-3p              | 2 |
| <i>circMVB12B</i> | miR-1231                 | 2 |
| <i>circMVB12B</i> | miR-1236-3p              | 2 |
| <i>circMVB12B</i> | miR-1237-5p/4488/4697-5p | 4 |
| <i>circMVB12B</i> | miR-1245b-3p             | 1 |
| <i>circMVB12B</i> | miR-1252-3p              | 4 |
| <i>circMVB12B</i> | miR-1253                 | 3 |
| <i>circMVB12B</i> | miR-1255a/1255b-5p       | 2 |
| <i>circMVB12B</i> | miR-1263                 | 3 |
| <i>circMVB12B</i> | miR-127-5p               | 1 |
| <i>circMVB12B</i> | miR-1273e                | 1 |
| <i>circMVB12B</i> | miR-1273f                | 3 |
| <i>circMVB12B</i> | miR-1275/4665-5p         | 4 |
| <i>circMVB12B</i> | miR-128-1-5p             | 1 |
| <i>circMVB12B</i> | miR-1288-5p              | 2 |

|                   |                      |   |
|-------------------|----------------------|---|
| <i>circMVB12B</i> | miR-1290             | 3 |
| <i>circMVB12B</i> | miR-1293/4483        | 3 |
| <i>circMVB12B</i> | miR-1298-3p          | 2 |
| <i>circMVB12B</i> | miR-132-5p           | 1 |
| <i>circMVB12B</i> | miR-133a-3p.1        | 1 |
| <i>circMVB12B</i> | miR-133a-3p.2/133b   | 1 |
| <i>circMVB12B</i> | miR-134-3p           | 4 |
| <i>circMVB12B</i> | miR-138-2-3p         | 2 |
| <i>circMVB12B</i> | miR-140-3p.1         | 3 |
| <i>circMVB12B</i> | miR-141-5p           | 2 |
| <i>circMVB12B</i> | miR-143-3p           | 3 |
| <i>circMVB12B</i> | miR-145-3p           | 4 |
| <i>circMVB12B</i> | miR-1468-5p          | 1 |
| <i>circMVB12B</i> | miR-147a             | 2 |
| <i>circMVB12B</i> | miR-150-3p           | 3 |
| <i>circMVB12B</i> | miR-152-5p           | 1 |
| <i>circMVB12B</i> | miR-155-5p           | 2 |
| <i>circMVB12B</i> | miR-181d-3p          | 2 |
| <i>circMVB12B</i> | miR-1827             | 3 |
| <i>circMVB12B</i> | miR-183-3p           | 1 |
| <i>circMVB12B</i> | miR-18a-3p           | 2 |
| <i>circMVB12B</i> | miR-19-3p            | 2 |
| <i>circMVB12B</i> | miR-1908-5p          | 1 |
| <i>circMVB12B</i> | miR-1910-3p/6511a-5p | 4 |
| <i>circMVB12B</i> | miR-1914-5p          | 2 |
| <i>circMVB12B</i> | miR-1976             | 3 |
| <i>circMVB12B</i> | miR-202-5p           | 2 |
| <i>circMVB12B</i> | miR-204-3p/4646-5p   | 7 |
| <i>circMVB12B</i> | miR-211-3p           | 2 |
| <i>circMVB12B</i> | miR-2115-5p          | 1 |
| <i>circMVB12B</i> | miR-212-5p           | 1 |
| <i>circMVB12B</i> | miR-214-5p           | 1 |
| <i>circMVB12B</i> | miR-219a-2-3p        | 1 |
| <i>circMVB12B</i> | miR-219b-3p          | 1 |
| <i>circMVB12B</i> | miR-219b-5p          | 3 |
| <i>circMVB12B</i> | miR-23-5p            | 2 |
| <i>circMVB12B</i> | miR-2355-5p          | 5 |
| <i>circMVB12B</i> | miR-2682-3p/6781-3p  | 2 |

|                   |                     |   |
|-------------------|---------------------|---|
| <i>circMVB12B</i> | miR-26b-3p          | 4 |
| <i>circMVB12B</i> | miR-27b-5p          | 1 |
| <i>circMVB12B</i> | miR-2861            | 2 |
| <i>circMVB12B</i> | miR-29a-5p          | 2 |
| <i>circMVB12B</i> | miR-29b-1-5p        | 1 |
| <i>circMVB12B</i> | miR-3074-5p         | 4 |
| <i>circMVB12B</i> | miR-31-5p           | 2 |
| <i>circMVB12B</i> | miR-3120-5p         | 2 |
| <i>circMVB12B</i> | miR-3122/3913-5p    | 1 |
| <i>circMVB12B</i> | miR-3124-3p         | 4 |
| <i>circMVB12B</i> | miR-3126-3p         | 2 |
| <i>circMVB12B</i> | miR-3128            | 1 |
| <i>circMVB12B</i> | miR-3136-3p/7155-3p | 2 |
| <i>circMVB12B</i> | miR-3136-5p/4439    | 4 |
| <i>circMVB12B</i> | miR-3140-5p         | 2 |
| <i>circMVB12B</i> | miR-3147            | 3 |
| <i>circMVB12B</i> | miR-3148            | 2 |
| <i>circMVB12B</i> | miR-3165            | 3 |
| <i>circMVB12B</i> | miR-3170/6855-5p    | 3 |
| <i>circMVB12B</i> | miR-3177-5p         | 1 |
| <i>circMVB12B</i> | miR-3180-5p         | 3 |
| <i>circMVB12B</i> | miR-3182            | 3 |
| <i>circMVB12B</i> | miR-3186-5p         | 3 |
| <i>circMVB12B</i> | miR-3189-3p         | 1 |
| <i>circMVB12B</i> | miR-3190-3p         | 3 |
| <i>circMVB12B</i> | miR-3192-5p         | 7 |
| <i>circMVB12B</i> | miR-3197            | 1 |
| <i>circMVB12B</i> | miR-3200-3p         | 1 |
| <i>circMVB12B</i> | miR-3202            | 7 |
| <i>circMVB12B</i> | miR-323b-3p         | 1 |
| <i>circMVB12B</i> | miR-324-3p/1913     | 2 |
| <i>circMVB12B</i> | miR-324-5p          | 1 |
| <i>circMVB12B</i> | miR-34-5p/449-5p    | 2 |
| <i>circMVB12B</i> | miR-340-3p/6827-3p  | 2 |
| <i>circMVB12B</i> | miR-342-5p/4664-5p  | 3 |
| <i>circMVB12B</i> | miR-345-3p          | 2 |
| <i>circMVB12B</i> | miR-34b-5p/449c-5p  | 4 |
| <i>circMVB12B</i> | miR-3611            | 2 |

|                   |                    |   |
|-------------------|--------------------|---|
| <i>circMVB12B</i> | miR-3612           | 5 |
| <i>circMVB12B</i> | miR-363-5p/6745    | 3 |
| <i>circMVB12B</i> | miR-3646           | 4 |
| <i>circMVB12B</i> | miR-3651           | 2 |
| <i>circMVB12B</i> | miR-3652/4430      | 3 |
| <i>circMVB12B</i> | miR-3653-5p        | 3 |
| <i>circMVB12B</i> | miR-3657           | 2 |
| <i>circMVB12B</i> | miR-3662           | 3 |
| <i>circMVB12B</i> | miR-3664-5p        | 3 |
| <i>circMVB12B</i> | miR-3679-3p        | 2 |
| <i>circMVB12B</i> | miR-3685           | 2 |
| <i>circMVB12B</i> | miR-3692-5p        | 2 |
| <i>circMVB12B</i> | miR-370-3p         | 1 |
| <i>circMVB12B</i> | miR-376-3p         | 1 |
| <i>circMVB12B</i> | miR-378a-5p        | 3 |
| <i>circMVB12B</i> | miR-380-5p/563     | 3 |
| <i>circMVB12B</i> | miR-384            | 2 |
| <i>circMVB12B</i> | miR-3912-5p        | 1 |
| <i>circMVB12B</i> | miR-3922-5p        | 2 |
| <i>circMVB12B</i> | miR-3940-5p/4507   | 4 |
| <i>circMVB12B</i> | miR-3978           | 2 |
| <i>circMVB12B</i> | miR-423-3p         | 2 |
| <i>circMVB12B</i> | miR-4251           | 3 |
| <i>circMVB12B</i> | miR-4252           | 1 |
| <i>circMVB12B</i> | miR-4257           | 4 |
| <i>circMVB12B</i> | miR-4260           | 3 |
| <i>circMVB12B</i> | miR-4265/4296/4322 | 4 |
| <i>circMVB12B</i> | miR-4269/6715b-5p  | 2 |
| <i>circMVB12B</i> | miR-4277           | 2 |
| <i>circMVB12B</i> | miR-4279           | 2 |
| <i>circMVB12B</i> | miR-4283           | 5 |
| <i>circMVB12B</i> | miR-4291           | 5 |
| <i>circMVB12B</i> | miR-4293           | 2 |
| <i>circMVB12B</i> | miR-4302           | 1 |
| <i>circMVB12B</i> | miR-4303           | 3 |
| <i>circMVB12B</i> | miR-4310/7157-5p   | 1 |
| <i>circMVB12B</i> | miR-4314           | 2 |
| <i>circMVB12B</i> | miR-432-5p         | 3 |

|                   |                          |   |
|-------------------|--------------------------|---|
| <i>circMVB12B</i> | miR-4329                 | 3 |
| <i>circMVB12B</i> | miR-433-3p               | 3 |
| <i>circMVB12B</i> | miR-4421/5699-3p         | 1 |
| <i>circMVB12B</i> | miR-4425                 | 3 |
| <i>circMVB12B</i> | miR-4427                 | 1 |
| <i>circMVB12B</i> | miR-4431                 | 1 |
| <i>circMVB12B</i> | miR-4437                 | 1 |
| <i>circMVB12B</i> | miR-4438                 | 1 |
| <i>circMVB12B</i> | miR-4443                 | 4 |
| <i>circMVB12B</i> | miR-4452                 | 1 |
| <i>circMVB12B</i> | miR-4454                 | 2 |
| <i>circMVB12B</i> | miR-4489                 | 5 |
| <i>circMVB12B</i> | miR-4490                 | 2 |
| <i>circMVB12B</i> | miR-4493                 | 3 |
| <i>circMVB12B</i> | miR-4502                 | 4 |
| <i>circMVB12B</i> | miR-4505/5787            | 3 |
| <i>circMVB12B</i> | miR-4508                 | 2 |
| <i>circMVB12B</i> | miR-450a-1-3p            | 1 |
| <i>circMVB12B</i> | miR-450a-2-3p            | 3 |
| <i>circMVB12B</i> | miR-450b-3p/769-3p       | 2 |
| <i>circMVB12B</i> | miR-4514/4692            | 2 |
| <i>circMVB12B</i> | miR-4533                 | 7 |
| <i>circMVB12B</i> | miR-4637                 | 1 |
| <i>circMVB12B</i> | miR-4641                 | 4 |
| <i>circMVB12B</i> | miR-4649-3p              | 2 |
| <i>circMVB12B</i> | miR-4656                 | 3 |
| <i>circMVB12B</i> | miR-4659a-3p/4659b-3p    | 2 |
| <i>circMVB12B</i> | miR-466                  | 2 |
| <i>circMVB12B</i> | miR-4660                 | 7 |
| <i>circMVB12B</i> | miR-4667-5p/4700-5p/8089 | 3 |
| <i>circMVB12B</i> | miR-4669                 | 2 |
| <i>circMVB12B</i> | miR-4675/4741            | 3 |
| <i>circMVB12B</i> | miR-4678                 | 1 |
| <i>circMVB12B</i> | miR-4680-3p              | 1 |
| <i>circMVB12B</i> | miR-4686                 | 2 |
| <i>circMVB12B</i> | miR-4706/4749-5p         | 1 |
| <i>circMVB12B</i> | miR-4708-3p              | 2 |
| <i>circMVB12B</i> | miR-4708-5p              | 3 |



|                   |                             |   |
|-------------------|-----------------------------|---|
| <i>circMVB12B</i> | miR-4713-3p                 | 1 |
| <i>circMVB12B</i> | miR-4714-5p                 | 3 |
| <i>circMVB12B</i> | miR-4719                    | 2 |
| <i>circMVB12B</i> | miR-4720-5p/4799-3p/5588-5p | 1 |
| <i>circMVB12B</i> | miR-4727-5p                 | 2 |
| <i>circMVB12B</i> | miR-4728-3p                 | 2 |
| <i>circMVB12B</i> | miR-4731-5p                 | 3 |
| <i>circMVB12B</i> | miR-4742-5p                 | 2 |
| <i>circMVB12B</i> | miR-4747-5p/5196-5p         | 6 |
| <i>circMVB12B</i> | miR-4762-3p                 | 3 |
| <i>circMVB12B</i> | miR-4762-5p                 | 1 |
| <i>circMVB12B</i> | miR-4763-5p                 | 2 |
| <i>circMVB12B</i> | miR-4774-5p                 | 2 |
| <i>circMVB12B</i> | miR-4778-3p                 | 1 |
| <i>circMVB12B</i> | miR-4786-3p                 | 3 |
| <i>circMVB12B</i> | miR-488-5p                  | 4 |
| <i>circMVB12B</i> | miR-493-3p                  | 4 |
| <i>circMVB12B</i> | miR-494-3p                  | 1 |
| <i>circMVB12B</i> | miR-5001-3p                 | 2 |
| <i>circMVB12B</i> | miR-5004-3p                 | 1 |
| <i>circMVB12B</i> | miR-5007-3p                 | 1 |
| <i>circMVB12B</i> | miR-5008-3p/6737-3p/7157-3p | 1 |
| <i>circMVB12B</i> | miR-5009-3p                 | 1 |
| <i>circMVB12B</i> | miR-501-3p/502-3p           | 2 |
| <i>circMVB12B</i> | miR-502-5p                  | 3 |
| <i>circMVB12B</i> | miR-5089-5p                 | 2 |
| <i>circMVB12B</i> | miR-5090/6775-5p            | 2 |
| <i>circMVB12B</i> | miR-5092                    | 1 |
| <i>circMVB12B</i> | miR-513a-3p/513c-3p/3606-3p | 1 |
| <i>circMVB12B</i> | miR-513b-3p                 | 1 |
| <i>circMVB12B</i> | miR-513b-5p                 | 2 |
| <i>circMVB12B</i> | miR-514a-5p                 | 3 |
| <i>circMVB12B</i> | miR-516a-3p/516b-3p/7162-5p | 1 |
| <i>circMVB12B</i> | miR-5187-3p                 | 1 |
| <i>circMVB12B</i> | miR-5187-5p                 | 2 |
| <i>circMVB12B</i> | miR-524-3p/525-3p           | 3 |
| <i>circMVB12B</i> | miR-525-5p                  | 2 |
| <i>circMVB12B</i> | miR-542-5p                  | 1 |

|                   |                    |   |
|-------------------|--------------------|---|
| <i>circMVB12B</i> | miR-548au-3p       | 2 |
| <i>circMVB12B</i> | miR-548e-5p        | 1 |
| <i>circMVB12B</i> | miR-552-3p         | 4 |
| <i>circMVB12B</i> | miR-556-5p         | 1 |
| <i>circMVB12B</i> | miR-5572           | 3 |
| <i>circMVB12B</i> | miR-5589-5p        | 3 |
| <i>circMVB12B</i> | miR-5692a          | 1 |
| <i>circMVB12B</i> | miR-5700           | 2 |
| <i>circMVB12B</i> | miR-5702           | 2 |
| <i>circMVB12B</i> | miR-578            | 3 |
| <i>circMVB12B</i> | miR-580-5p         | 1 |
| <i>circMVB12B</i> | miR-581            | 1 |
| <i>circMVB12B</i> | miR-596            | 2 |
| <i>circMVB12B</i> | miR-597-3p         | 1 |
| <i>circMVB12B</i> | miR-598-3p         | 1 |
| <i>circMVB12B</i> | miR-605-3p         | 3 |
| <i>circMVB12B</i> | miR-606            | 3 |
| <i>circMVB12B</i> | miR-6070           | 2 |
| <i>circMVB12B</i> | miR-6071           | 2 |
| <i>circMVB12B</i> | miR-6075           | 1 |
| <i>circMVB12B</i> | miR-608/4651       | 3 |
| <i>circMVB12B</i> | miR-6087           | 1 |
| <i>circMVB12B</i> | miR-6124           | 2 |
| <i>circMVB12B</i> | miR-617            | 1 |
| <i>circMVB12B</i> | miR-619-5p/6506-5p | 7 |
| <i>circMVB12B</i> | miR-626/6876-3p    | 2 |
| <i>circMVB12B</i> | miR-627-5p         | 2 |
| <i>circMVB12B</i> | miR-632/4288       | 2 |
| <i>circMVB12B</i> | miR-637            | 3 |
| <i>circMVB12B</i> | miR-638            | 1 |
| <i>circMVB12B</i> | miR-640            | 3 |
| <i>circMVB12B</i> | miR-642b-5p        | 3 |
| <i>circMVB12B</i> | miR-648            | 1 |
| <i>circMVB12B</i> | miR-6499-3p        | 3 |
| <i>circMVB12B</i> | miR-6505-3p        | 1 |
| <i>circMVB12B</i> | miR-6505-5p        | 2 |
| <i>circMVB12B</i> | miR-6513-5p        | 1 |
| <i>circMVB12B</i> | miR-6515-3p        | 2 |

|                   |                             |   |
|-------------------|-----------------------------|---|
| <i>circMVB12B</i> | miR-6515-5p                 | 4 |
| <i>circMVB12B</i> | miR-653-5p                  | 4 |
| <i>circMVB12B</i> | miR-6727-5p                 | 1 |
| <i>circMVB12B</i> | miR-6728-3p                 | 4 |
| <i>circMVB12B</i> | miR-6728-5p                 | 2 |
| <i>circMVB12B</i> | miR-6733-3p                 | 1 |
| <i>circMVB12B</i> | miR-6735-3p                 | 1 |
| <i>circMVB12B</i> | miR-6737-5p/6812-5p/6819-5p | 3 |
| <i>circMVB12B</i> | miR-6744-5p                 | 2 |
| <i>circMVB12B</i> | miR-6747-5p                 | 3 |
| <i>circMVB12B</i> | miR-6748-3p                 | 1 |
| <i>circMVB12B</i> | miR-6748-5p                 | 3 |
| <i>circMVB12B</i> | miR-6751-5p/6803-5p         | 4 |
| <i>circMVB12B</i> | miR-6756-5p/6766-5p         | 3 |
| <i>circMVB12B</i> | miR-6759-5p                 | 4 |
| <i>circMVB12B</i> | miR-676-3p                  | 1 |
| <i>circMVB12B</i> | miR-6761-5p                 | 3 |
| <i>circMVB12B</i> | miR-6762-5p/6845-5p         | 1 |
| <i>circMVB12B</i> | miR-6765-5p                 | 1 |
| <i>circMVB12B</i> | miR-6768-5p                 | 2 |
| <i>circMVB12B</i> | miR-6770-5p                 | 3 |
| <i>circMVB12B</i> | miR-6793-3p                 | 1 |
| <i>circMVB12B</i> | miR-6793-5p                 | 3 |
| <i>circMVB12B</i> | miR-6796-5p                 | 4 |
| <i>circMVB12B</i> | miR-6801-5p                 | 1 |
| <i>circMVB12B</i> | miR-6809-5p                 | 2 |
| <i>circMVB12B</i> | miR-6811-3p                 | 1 |
| <i>circMVB12B</i> | miR-6813-3p                 | 1 |
| <i>circMVB12B</i> | miR-6815-3p                 | 2 |
| <i>circMVB12B</i> | miR-6818-5p                 | 2 |
| <i>circMVB12B</i> | miR-6819-3p/6877-3p         | 3 |
| <i>circMVB12B</i> | miR-6827-5p                 | 6 |
| <i>circMVB12B</i> | miR-6828-3p                 | 2 |
| <i>circMVB12B</i> | miR-6829-5p                 | 3 |
| <i>circMVB12B</i> | miR-6830-3p                 | 3 |
| <i>circMVB12B</i> | miR-6839-3p                 | 4 |
| <i>circMVB12B</i> | miR-6844                    | 3 |
| <i>circMVB12B</i> | miR-6846-5p/6848-5p         | 4 |

|                   |                           |   |
|-------------------|---------------------------|---|
| <i>circMVB12B</i> | miR-6847-5p               | 4 |
| <i>circMVB12B</i> | miR-6850-3p               | 1 |
| <i>circMVB12B</i> | miR-6856-3p               | 1 |
| <i>circMVB12B</i> | miR-6867-5p               | 3 |
| <i>circMVB12B</i> | miR-6868-5p               | 1 |
| <i>circMVB12B</i> | miR-6871-5p               | 1 |
| <i>circMVB12B</i> | miR-6872-3p               | 2 |
| <i>circMVB12B</i> | miR-6875-3p               | 2 |
| <i>circMVB12B</i> | miR-6880-5p               | 3 |
| <i>circMVB12B</i> | miR-6889-3p               | 1 |
| <i>circMVB12B</i> | miR-7109-5p               | 4 |
| <i>circMVB12B</i> | miR-7151-5p               | 4 |
| <i>circMVB12B</i> | miR-7152-5p               | 4 |
| <i>circMVB12B</i> | miR-7154-5p               | 3 |
| <i>circMVB12B</i> | miR-7155-5p               | 3 |
| <i>circMVB12B</i> | miR-7162-3p               | 2 |
| <i>circMVB12B</i> | miR-744-5p                | 1 |
| <i>circMVB12B</i> | miR-758-3p                | 2 |
| <i>circMVB12B</i> | miR-758-5p                | 3 |
| <i>circMVB12B</i> | miR-762/4492/4498/5001-5p | 3 |
| <i>circMVB12B</i> | miR-7641                  | 1 |
| <i>circMVB12B</i> | miR-7843-3p               | 1 |
| <i>circMVB12B</i> | miR-7847-3p               | 3 |
| <i>circMVB12B</i> | miR-7850-5p               | 2 |
| <i>circMVB12B</i> | miR-8071                  | 3 |
| <i>circMVB12B</i> | miR-8075                  | 4 |
| <i>circMVB12B</i> | miR-8088                  | 2 |
| <i>circMVB12B</i> | miR-876-5p                | 3 |
| <i>circMVB12B</i> | miR-885-3p                | 4 |
| <i>circMVB12B</i> | miR-887-5p                | 1 |
| <i>circMVB12B</i> | miR-891b                  | 3 |
| <i>circMVB12B</i> | miR-9-5p                  | 2 |
| <i>circMVB12B</i> | miR-92a-1-5p              | 3 |
| <i>circMVB12B</i> | miR-93-3p                 | 2 |
| <i>circMVB12B</i> | miR-937-5p                | 2 |
| <i>circMVB12B</i> | miR-940/6808-5p/6893-5p   | 4 |
| <i>circMVB12B</i> | miR-943                   | 4 |
| <i>circMVB12B</i> | miR-95-5p                 | 1 |

|                   |                                       |   |
|-------------------|---------------------------------------|---|
| <i>circMVB12B</i> | let-7a-2-3p/let-7g-3p                 | 1 |
| <i>circMVB12B</i> | let-7a-3p/let-7b-3p/let-7f-1-3p/98-3p | 1 |
| <i>circMVB12B</i> | let-7c-3p                             | 1 |
| <i>circMVB12B</i> | let-7f-2-3p/1185-3p                   | 1 |
| <i>circMVB12B</i> | miR-10-5p                             | 1 |
| <i>circMVB12B</i> | miR-100-3p                            | 1 |
| <i>circMVB12B</i> | miR-101-3p.1                          | 1 |
| <i>circMVB12B</i> | miR-105-3p                            | 1 |
| <i>circMVB12B</i> | miR-105-5p                            | 3 |
| <i>circMVB12B</i> | miR-106a-3p                           | 2 |
| <i>circMVB12B</i> | miR-106b-3p                           | 1 |
| <i>circMVB12B</i> | miR-1179                              | 1 |
| <i>circMVB12B</i> | miR-1183                              | 2 |
| <i>circMVB12B</i> | miR-1184                              | 1 |
| <i>circMVB12B</i> | miR-1197                              | 2 |
| <i>circMVB12B</i> | miR-1203                              | 1 |
| <i>circMVB12B</i> | miR-1205                              | 1 |
| <i>circMVB12B</i> | miR-1206                              | 1 |
| <i>circMVB12B</i> | miR-1207-5p/4763-3p                   | 2 |
| <i>circMVB12B</i> | miR-122-5p                            | 2 |
| <i>circMVB12B</i> | miR-1224-3p                           | 1 |
| <i>circMVB12B</i> | miR-1224-5p                           | 2 |
| <i>circMVB12B</i> | miR-1226-3p                           | 2 |
| <i>circMVB12B</i> | miR-1229-3p                           | 1 |
| <i>circMVB12B</i> | miR-1233-3p                           | 1 |
| <i>circMVB12B</i> | miR-1236-5p                           | 1 |
| <i>circMVB12B</i> | miR-1237-3p                           | 1 |
| <i>circMVB12B</i> | miR-124-3p.2/506-3p                   | 1 |
| <i>circMVB12B</i> | miR-124-5p                            | 1 |
| <i>circMVB12B</i> | miR-1245a/8079                        | 4 |
| <i>circMVB12B</i> | miR-1245b-5p                          | 1 |
| <i>circMVB12B</i> | miR-1247-3p                           | 1 |
| <i>circMVB12B</i> | miR-1248                              | 1 |
| <i>circMVB12B</i> | miR-1249-3p                           | 1 |
| <i>circMVB12B</i> | miR-1249-5p/6797-5p                   | 1 |
| <i>circMVB12B</i> | miR-125-5p                            | 1 |
| <i>circMVB12B</i> | miR-1250-3p                           | 1 |
| <i>circMVB12B</i> | miR-1251-3p                           | 1 |

|                   |                   |   |
|-------------------|-------------------|---|
| <i>circMVB12B</i> | miR-1252-5p       | 2 |
| <i>circMVB12B</i> | miR-1254/3116     | 1 |
| <i>circMVB12B</i> | miR-1255b-2-3p    | 1 |
| <i>circMVB12B</i> | miR-1258          | 1 |
| <i>circMVB12B</i> | miR-125a-3p       | 4 |
| <i>circMVB12B</i> | miR-126-5p        | 2 |
| <i>circMVB12B</i> | miR-1266-3p       | 1 |
| <i>circMVB12B</i> | miR-1266-5p/4518  | 1 |
| <i>circMVB12B</i> | miR-1267          | 1 |
| <i>circMVB12B</i> | miR-1269          | 1 |
| <i>circMVB12B</i> | miR-1270          | 1 |
| <i>circMVB12B</i> | miR-1272          | 1 |
| <i>circMVB12B</i> | miR-1273a         | 1 |
| <i>circMVB12B</i> | miR-1273d         | 2 |
| <i>circMVB12B</i> | miR-1273h-3p      | 3 |
| <i>circMVB12B</i> | miR-1277-5p       | 1 |
| <i>circMVB12B</i> | miR-1278          | 1 |
| <i>circMVB12B</i> | miR-1279          | 2 |
| <i>circMVB12B</i> | miR-128-3p        | 1 |
| <i>circMVB12B</i> | miR-1283          | 1 |
| <i>circMVB12B</i> | miR-1284          | 2 |
| <i>circMVB12B</i> | miR-1286          | 1 |
| <i>circMVB12B</i> | miR-129-5p        | 1 |
| <i>circMVB12B</i> | miR-1291/6775-3p  | 1 |
| <i>circMVB12B</i> | miR-1292-5p       | 1 |
| <i>circMVB12B</i> | miR-1294          | 1 |
| <i>circMVB12B</i> | miR-1301-3p       | 1 |
| <i>circMVB12B</i> | miR-1303          | 2 |
| <i>circMVB12B</i> | miR-1304-3p       | 1 |
| <i>circMVB12B</i> | miR-1305          | 1 |
| <i>circMVB12B</i> | miR-1307-3p       | 1 |
| <i>circMVB12B</i> | miR-130b-5p       | 2 |
| <i>circMVB12B</i> | miR-132-3p/212-3p | 2 |
| <i>circMVB12B</i> | miR-1322          | 1 |
| <i>circMVB12B</i> | miR-1323          | 2 |
| <i>circMVB12B</i> | miR-1324          | 2 |
| <i>circMVB12B</i> | miR-133a-5p       | 2 |
| <i>circMVB12B</i> | miR-134-5p        | 2 |

|                   |                                      |   |
|-------------------|--------------------------------------|---|
| <i>circMVB12B</i> | miR-1343-3p                          | 1 |
| <i>circMVB12B</i> | miR-135-5p                           | 2 |
| <i>circMVB12B</i> | miR-135a-3p                          | 2 |
| <i>circMVB12B</i> | miR-137                              | 1 |
| <i>circMVB12B</i> | miR-138-5p                           | 2 |
| <i>circMVB12B</i> | miR-139-3p                           | 2 |
| <i>circMVB12B</i> | miR-140-3p.2                         | 3 |
| <i>circMVB12B</i> | miR-141-3p/200-3p                    | 1 |
| <i>circMVB12B</i> | miR-142-5p                           | 2 |
| <i>circMVB12B</i> | miR-143-5p                           | 1 |
| <i>circMVB12B</i> | miR-144-3p                           | 1 |
| <i>circMVB12B</i> | miR-146-5p                           | 1 |
| <i>circMVB12B</i> | miR-1468-3p                          | 1 |
| <i>circMVB12B</i> | miR-1470                             | 3 |
| <i>circMVB12B</i> | miR-148-3p/152-3p                    | 3 |
| <i>circMVB12B</i> | miR-149-3p/4728-5p/6785-5p/6883-5p   | 1 |
| <i>circMVB12B</i> | miR-149-5p                           | 1 |
| <i>circMVB12B</i> | miR-15-5p/16-5p/195-5p/424-5p/497-5p | 2 |
| <i>circMVB12B</i> | miR-151-3p                           | 1 |
| <i>circMVB12B</i> | miR-153-3p                           | 2 |
| <i>circMVB12B</i> | miR-153-5p                           | 1 |
| <i>circMVB12B</i> | miR-1537-5p                          | 3 |
| <i>circMVB12B</i> | miR-16-1-3p                          | 1 |
| <i>circMVB12B</i> | miR-17-3p                            | 1 |
| <i>circMVB12B</i> | miR-17-5p/20-5p/93-5p/106-5p/519-3p  | 1 |
| <i>circMVB12B</i> | miR-18-5p                            | 1 |
| <i>circMVB12B</i> | miR-181-5p                           | 2 |
| <i>circMVB12B</i> | miR-182-3p                           | 1 |
| <i>circMVB12B</i> | miR-182-5p                           | 2 |
| <i>circMVB12B</i> | miR-1825                             | 1 |
| <i>circMVB12B</i> | miR-183-5p.1                         | 2 |
| <i>circMVB12B</i> | miR-183-5p.2                         | 1 |
| <i>circMVB12B</i> | miR-186-3p                           | 1 |
| <i>circMVB12B</i> | miR-186-5p                           | 1 |
| <i>circMVB12B</i> | miR-187-3p                           | 1 |
| <i>circMVB12B</i> | miR-188-5p                           | 2 |
| <i>circMVB12B</i> | miR-19-5p                            | 1 |
| <i>circMVB12B</i> | miR-190-5p                           | 1 |

|                   |                     |   |
|-------------------|---------------------|---|
| <i>circMVB12B</i> | miR-1909-3p/6722-3p | 2 |
| <i>circMVB12B</i> | miR-1909-5p         | 1 |
| <i>circMVB12B</i> | miR-1911-3p         | 1 |
| <i>circMVB12B</i> | miR-1911-5p         | 1 |
| <i>circMVB12B</i> | miR-1915-3p/6764-5p | 1 |
| <i>circMVB12B</i> | miR-1915-5p         | 2 |
| <i>circMVB12B</i> | miR-192-3p          | 1 |
| <i>circMVB12B</i> | miR-192-5p/215-5p   | 1 |
| <i>circMVB12B</i> | miR-193b-5p         | 1 |
| <i>circMVB12B</i> | miR-194-5p          | 1 |
| <i>circMVB12B</i> | miR-196a-3p         | 1 |
| <i>circMVB12B</i> | miR-196b-3p         | 1 |
| <i>circMVB12B</i> | miR-197-3p          | 1 |
| <i>circMVB12B</i> | miR-197-5p/3132     | 1 |
| <i>circMVB12B</i> | miR-199-5p          | 1 |
| <i>circMVB12B</i> | miR-200-3p/429      | 1 |
| <i>circMVB12B</i> | miR-203b-5p/6718-5p | 1 |
| <i>circMVB12B</i> | miR-204-5p/211-5p   | 1 |
| <i>circMVB12B</i> | miR-205-3p          | 1 |
| <i>circMVB12B</i> | miR-2052            | 1 |
| <i>circMVB12B</i> | miR-2053            | 2 |
| <i>circMVB12B</i> | miR-2054            | 1 |
| <i>circMVB12B</i> | miR-208-3p          | 1 |
| <i>circMVB12B</i> | miR-21-5p/590-5p    | 1 |
| <i>circMVB12B</i> | miR-2113            | 1 |
| <i>circMVB12B</i> | miR-2114-3p         | 1 |
| <i>circMVB12B</i> | miR-2116-5p         | 2 |
| <i>circMVB12B</i> | miR-2117            | 1 |
| <i>circMVB12B</i> | miR-214-3p/3619-5p  | 5 |
| <i>circMVB12B</i> | miR-215-3p          | 1 |
| <i>circMVB12B</i> | miR-216a-5p         | 2 |
| <i>circMVB12B</i> | miR-216b-5p         | 2 |
| <i>circMVB12B</i> | miR-218-1-3p        | 1 |
| <i>circMVB12B</i> | miR-218-2-3p        | 1 |
| <i>circMVB12B</i> | miR-219-5p          | 1 |
| <i>circMVB12B</i> | miR-219a-1-3p       | 1 |
| <i>circMVB12B</i> | miR-22-3p           | 1 |
| <i>circMVB12B</i> | miR-22-5p           | 2 |



|                   |                                              |   |
|-------------------|----------------------------------------------|---|
| <i>circMVB12B</i> | miR-223-5p                                   | 1 |
| <i>circMVB12B</i> | miR-224-5p                                   | 1 |
| <i>circMVB12B</i> | miR-2276-3p                                  | 3 |
| <i>circMVB12B</i> | miR-2277-3p                                  | 1 |
| <i>circMVB12B</i> | miR-2278                                     | 2 |
| <i>circMVB12B</i> | miR-2392                                     | 1 |
| <i>circMVB12B</i> | miR-24-3p                                    | 2 |
| <i>circMVB12B</i> | miR-2467-3p                                  | 2 |
| <i>circMVB12B</i> | miR-2467-5p                                  | 2 |
| <i>circMVB12B</i> | miR-25-5p                                    | 1 |
| <i>circMVB12B</i> | miR-26-3p                                    | 2 |
| <i>circMVB12B</i> | miR-2681-3p                                  | 1 |
| <i>circMVB12B</i> | miR-2681-5p                                  | 1 |
| <i>circMVB12B</i> | miR-27-3p                                    | 1 |
| <i>circMVB12B</i> | miR-27a-5p                                   | 2 |
| <i>circMVB12B</i> | miR-28-5p/708-5p                             | 1 |
| <i>circMVB12B</i> | miR-2909                                     | 1 |
| <i>circMVB12B</i> | miR-296-5p                                   | 1 |
| <i>circMVB12B</i> | miR-298                                      | 2 |
| <i>circMVB12B</i> | miR-29b-2-5p                                 | 1 |
| <i>circMVB12B</i> | miR-30-3p                                    | 2 |
| <i>circMVB12B</i> | miR-30-5p                                    | 1 |
| <i>circMVB12B</i> | miR-302-3p/372-3p/373-3p/520-3p              | 1 |
| <i>circMVB12B</i> | miR-302a-5p                                  | 1 |
| <i>circMVB12B</i> | miR-302b-5p/302d-5p                          | 1 |
| <i>circMVB12B</i> | miR-302c-3p.2/520-3p                         | 3 |
| <i>circMVB12B</i> | miR-302c-5p                                  | 1 |
| <i>circMVB12B</i> | miR-3064-5p                                  | 2 |
| <i>circMVB12B</i> | miR-3065-3p                                  | 4 |
| <i>circMVB12B</i> | miR-30b-3p/1273h-5p/3689-3p/6779-5p/6780a-5p | 1 |
| <i>circMVB12B</i> | miR-30c-3p/6788-5p                           | 1 |
| <i>circMVB12B</i> | miR-3117-5p                                  | 1 |
| <i>circMVB12B</i> | miR-3119                                     | 3 |
| <i>circMVB12B</i> | miR-3120-3p                                  | 3 |
| <i>circMVB12B</i> | miR-3121-3p                                  | 1 |
| <i>circMVB12B</i> | miR-3121-5p                                  | 2 |
| <i>circMVB12B</i> | miR-3123                                     | 2 |
| <i>circMVB12B</i> | miR-3125/3916/6859-5p                        | 2 |

|                   |                       |   |
|-------------------|-----------------------|---|
| <i>circMVB12B</i> | miR-3127-5p           | 2 |
| <i>circMVB12B</i> | miR-3129-3p/5583-5p   | 1 |
| <i>circMVB12B</i> | miR-3133              | 1 |
| <i>circMVB12B</i> | miR-3134              | 2 |
| <i>circMVB12B</i> | miR-3140-3p           | 1 |
| <i>circMVB12B</i> | miR-3141              | 1 |
| <i>circMVB12B</i> | miR-3145-3p           | 1 |
| <i>circMVB12B</i> | miR-3149              | 1 |
| <i>circMVB12B</i> | miR-3150a-5p/3150b-5p | 1 |
| <i>circMVB12B</i> | miR-3150b-3p          | 1 |
| <i>circMVB12B</i> | miR-3151-3p           | 1 |
| <i>circMVB12B</i> | miR-3151-5p           | 1 |
| <i>circMVB12B</i> | miR-3152-3p           | 1 |
| <i>circMVB12B</i> | miR-3154              | 2 |
| <i>circMVB12B</i> | miR-3157-3p           | 2 |
| <i>circMVB12B</i> | miR-3157-5p           | 1 |
| <i>circMVB12B</i> | miR-3158-3p           | 1 |
| <i>circMVB12B</i> | miR-3158-5p           | 1 |
| <i>circMVB12B</i> | miR-3159              | 2 |
| <i>circMVB12B</i> | miR-3160-3p           | 3 |
| <i>circMVB12B</i> | miR-3160-5p           | 1 |
| <i>circMVB12B</i> | miR-3161              | 1 |
| <i>circMVB12B</i> | miR-3162-5p           | 2 |
| <i>circMVB12B</i> | miR-3163              | 1 |
| <i>circMVB12B</i> | miR-3164              | 2 |
| <i>circMVB12B</i> | miR-3166              | 1 |
| <i>circMVB12B</i> | miR-3171              | 1 |
| <i>circMVB12B</i> | miR-3173-3p/6891-5p   | 1 |
| <i>circMVB12B</i> | miR-3174              | 2 |
| <i>circMVB12B</i> | miR-3176/3922-3p      | 1 |
| <i>circMVB12B</i> | miR-3185              | 1 |
| <i>circMVB12B</i> | miR-3187-3p           | 1 |
| <i>circMVB12B</i> | miR-3188              | 2 |
| <i>circMVB12B</i> | miR-3190-5p           | 1 |
| <i>circMVB12B</i> | miR-3191-5p           | 1 |
| <i>circMVB12B</i> | miR-3193              | 1 |
| <i>circMVB12B</i> | miR-3194-3p           | 1 |
| <i>circMVB12B</i> | miR-3198/4309         | 1 |

|                   |                           |   |
|-------------------|---------------------------|---|
| <i>circMVB12B</i> | miR-32-3p                 | 2 |
| <i>circMVB12B</i> | miR-3200-5p               | 1 |
| <i>circMVB12B</i> | miR-323-3p                | 1 |
| <i>circMVB12B</i> | miR-323a-5p               | 3 |
| <i>circMVB12B</i> | miR-326                   | 2 |
| <i>circMVB12B</i> | miR-328-3p                | 1 |
| <i>circMVB12B</i> | miR-329-3p/362-3p         | 3 |
| <i>circMVB12B</i> | miR-33-5p                 | 2 |
| <i>circMVB12B</i> | miR-337-3p                | 1 |
| <i>circMVB12B</i> | miR-338-3p                | 2 |
| <i>circMVB12B</i> | miR-33a-3p                | 2 |
| <i>circMVB12B</i> | miR-33b-3p/515-3p/519e-3p | 1 |
| <i>circMVB12B</i> | miR-340-5p                | 1 |
| <i>circMVB12B</i> | miR-342-3p                | 2 |
| <i>circMVB12B</i> | miR-345-5p                | 3 |
| <i>circMVB12B</i> | miR-3529-3p               | 1 |
| <i>circMVB12B</i> | miR-3591-5p               | 1 |
| <i>circMVB12B</i> | miR-3606-5p               | 1 |
| <i>circMVB12B</i> | miR-3607-3p               | 1 |
| <i>circMVB12B</i> | miR-3614-3p               | 2 |
| <i>circMVB12B</i> | miR-3614-5p               | 1 |
| <i>circMVB12B</i> | miR-3616-3p               | 1 |
| <i>circMVB12B</i> | miR-3619-3p               | 1 |
| <i>circMVB12B</i> | miR-3622a-3p/3622b-3p     | 2 |
| <i>circMVB12B</i> | miR-3649                  | 1 |
| <i>circMVB12B</i> | miR-3653-3p               | 2 |
| <i>circMVB12B</i> | miR-3660/4526             | 2 |
| <i>circMVB12B</i> | miR-3663-3p               | 1 |
| <i>circMVB12B</i> | miR-3664-3p               | 1 |
| <i>circMVB12B</i> | miR-3667-5p               | 2 |
| <i>circMVB12B</i> | miR-3668                  | 1 |
| <i>circMVB12B</i> | miR-367-5p                | 1 |
| <i>circMVB12B</i> | miR-3670                  | 1 |
| <i>circMVB12B</i> | miR-3671                  | 1 |
| <i>circMVB12B</i> | miR-3672/6864-3p          | 1 |
| <i>circMVB12B</i> | miR-3675-3p               | 2 |
| <i>circMVB12B</i> | miR-3678-3p               | 3 |
| <i>circMVB12B</i> | miR-3680-3p               | 5 |

|                   |                                   |   |
|-------------------|-----------------------------------|---|
| <i>circMVB12B</i> | miR-3680-5p                       | 1 |
| <i>circMVB12B</i> | miR-3681-5p                       | 2 |
| <i>circMVB12B</i> | miR-3682-5p                       | 1 |
| <i>circMVB12B</i> | miR-3684                          | 1 |
| <i>circMVB12B</i> | miR-3688-5p                       | 1 |
| <i>circMVB12B</i> | miR-3689a-5p/3689b-5p/3689e/3689f | 1 |
| <i>circMVB12B</i> | miR-3691-3p                       | 4 |
| <i>circMVB12B</i> | miR-3691-5p                       | 2 |
| <i>circMVB12B</i> | miR-3692-3p                       | 2 |
| <i>circMVB12B</i> | miR-371a-3p                       | 1 |
| <i>circMVB12B</i> | miR-371b-3p                       | 1 |
| <i>circMVB12B</i> | miR-374a-3p                       | 1 |
| <i>circMVB12B</i> | miR-374c-3p                       | 1 |
| <i>circMVB12B</i> | miR-375                           | 3 |
| <i>circMVB12B</i> | miR-377-3p                        | 1 |
| <i>circMVB12B</i> | miR-378g                          | 1 |
| <i>circMVB12B</i> | miR-380-3p                        | 1 |
| <i>circMVB12B</i> | miR-381-3p                        | 1 |
| <i>circMVB12B</i> | miR-382-3p                        | 1 |
| <i>circMVB12B</i> | miR-382-5p                        | 2 |
| <i>circMVB12B</i> | miR-383-3p                        | 4 |
| <i>circMVB12B</i> | miR-3907                          | 1 |
| <i>circMVB12B</i> | miR-3909                          | 1 |
| <i>circMVB12B</i> | miR-3912-3p                       | 1 |
| <i>circMVB12B</i> | miR-3914                          | 2 |
| <i>circMVB12B</i> | miR-3915                          | 2 |
| <i>circMVB12B</i> | miR-3917                          | 1 |
| <i>circMVB12B</i> | miR-3918                          | 3 |
| <i>circMVB12B</i> | miR-3919                          | 3 |
| <i>circMVB12B</i> | miR-3925-3p                       | 2 |
| <i>circMVB12B</i> | miR-3925-5p                       | 2 |
| <i>circMVB12B</i> | miR-3926                          | 1 |
| <i>circMVB12B</i> | miR-3927-5p                       | 1 |
| <i>circMVB12B</i> | miR-3928-3p                       | 2 |
| <i>circMVB12B</i> | miR-3928-5p/6806-3p               | 1 |
| <i>circMVB12B</i> | miR-3929/4419b/4478               | 2 |
| <i>circMVB12B</i> | miR-3934-3p                       | 1 |
| <i>circMVB12B</i> | miR-3934-5p                       | 4 |

|                   |                       |   |
|-------------------|-----------------------|---|
| <i>circMVB12B</i> | miR-3944-5p           | 1 |
| <i>circMVB12B</i> | miR-3975              | 2 |
| <i>circMVB12B</i> | miR-3977              | 2 |
| <i>circMVB12B</i> | miR-409-3p            | 1 |
| <i>circMVB12B</i> | miR-410-3p            | 2 |
| <i>circMVB12B</i> | miR-411-3p            | 1 |
| <i>circMVB12B</i> | miR-425-3p            | 1 |
| <i>circMVB12B</i> | miR-425-5p            | 2 |
| <i>circMVB12B</i> | miR-4255              | 2 |
| <i>circMVB12B</i> | miR-4256              | 1 |
| <i>circMVB12B</i> | miR-4259              | 1 |
| <i>circMVB12B</i> | miR-4263              | 2 |
| <i>circMVB12B</i> | miR-4268              | 2 |
| <i>circMVB12B</i> | miR-4270/4441/6754-5p | 2 |
| <i>circMVB12B</i> | miR-4272              | 1 |
| <i>circMVB12B</i> | miR-4273/7156-5p      | 3 |
| <i>circMVB12B</i> | miR-4274              | 1 |
| <i>circMVB12B</i> | miR-4275              | 2 |
| <i>circMVB12B</i> | miR-4276              | 1 |
| <i>circMVB12B</i> | miR-4278              | 1 |
| <i>circMVB12B</i> | miR-4280              | 1 |
| <i>circMVB12B</i> | miR-4284              | 2 |
| <i>circMVB12B</i> | miR-4289              | 1 |
| <i>circMVB12B</i> | miR-4290              | 1 |
| <i>circMVB12B</i> | miR-4299              | 3 |
| <i>circMVB12B</i> | miR-4305              | 1 |
| <i>circMVB12B</i> | miR-431-5p            | 1 |
| <i>circMVB12B</i> | miR-4312              | 1 |
| <i>circMVB12B</i> | miR-4316              | 1 |
| <i>circMVB12B</i> | miR-432-3p            | 1 |
| <i>circMVB12B</i> | miR-4320              | 1 |
| <i>circMVB12B</i> | miR-4324              | 1 |
| <i>circMVB12B</i> | miR-4326              | 3 |
| <i>circMVB12B</i> | miR-4330              | 1 |
| <i>circMVB12B</i> | miR-4428              | 1 |
| <i>circMVB12B</i> | miR-4432              | 1 |
| <i>circMVB12B</i> | miR-4433a-3p          | 1 |
| <i>circMVB12B</i> | miR-4433a-5p          | 1 |

|                   |                                              |   |
|-------------------|----------------------------------------------|---|
| <i>circMVB12B</i> | miR-4433b-3p                                 | 1 |
| <i>circMVB12B</i> | miR-4433b-5p                                 | 2 |
| <i>circMVB12B</i> | miR-4435                                     | 1 |
| <i>circMVB12B</i> | miR-4436b-3p/4632-5p/6735-5p/6879-5p/7843-5p | 1 |
| <i>circMVB12B</i> | miR-4436b-5p                                 | 1 |
| <i>circMVB12B</i> | miR-4445-5p                                  | 1 |
| <i>circMVB12B</i> | miR-4446-3p                                  | 1 |
| <i>circMVB12B</i> | miR-4447/4472                                | 1 |
| <i>circMVB12B</i> | miR-4448                                     | 2 |
| <i>circMVB12B</i> | miR-4449                                     | 1 |
| <i>circMVB12B</i> | miR-4450                                     | 1 |
| <i>circMVB12B</i> | miR-4453/4538                                | 1 |
| <i>circMVB12B</i> | miR-4456                                     | 3 |
| <i>circMVB12B</i> | miR-4459                                     | 1 |
| <i>circMVB12B</i> | miR-4460                                     | 1 |
| <i>circMVB12B</i> | miR-4463                                     | 2 |
| <i>circMVB12B</i> | miR-4468                                     | 1 |
| <i>circMVB12B</i> | miR-4470                                     | 1 |
| <i>circMVB12B</i> | miR-4471/8059                                | 1 |
| <i>circMVB12B</i> | miR-4476/6876-5p                             | 2 |
| <i>circMVB12B</i> | miR-4477a                                    | 1 |
| <i>circMVB12B</i> | miR-4477b                                    | 1 |
| <i>circMVB12B</i> | miR-448                                      | 2 |
| <i>circMVB12B</i> | miR-4480                                     | 1 |
| <i>circMVB12B</i> | miR-4486                                     | 1 |
| <i>circMVB12B</i> | miR-4487                                     | 3 |
| <i>circMVB12B</i> | miR-4495                                     | 1 |
| <i>circMVB12B</i> | miR-4497                                     | 1 |
| <i>circMVB12B</i> | miR-4499                                     | 2 |
| <i>circMVB12B</i> | miR-450-5p                                   | 1 |
| <i>circMVB12B</i> | miR-4504                                     | 1 |
| <i>circMVB12B</i> | miR-4509                                     | 2 |
| <i>circMVB12B</i> | miR-450b-5p                                  | 5 |
| <i>circMVB12B</i> | miR-4511                                     | 1 |
| <i>circMVB12B</i> | miR-4513/6855-3p                             | 1 |
| <i>circMVB12B</i> | miR-4519                                     | 1 |
| <i>circMVB12B</i> | miR-451b                                     | 3 |
| <i>circMVB12B</i> | miR-452-3p                                   | 1 |

|                   |                     |   |
|-------------------|---------------------|---|
| <i>circMVB12B</i> | miR-452-5p/892-3p   | 3 |
| <i>circMVB12B</i> | miR-4522            | 1 |
| <i>circMVB12B</i> | miR-4524-5p         | 1 |
| <i>circMVB12B</i> | miR-4524a-3p        | 2 |
| <i>circMVB12B</i> | miR-4524b-3p        | 2 |
| <i>circMVB12B</i> | miR-4530            | 2 |
| <i>circMVB12B</i> | miR-4531            | 1 |
| <i>circMVB12B</i> | miR-4534/8082       | 2 |
| <i>circMVB12B</i> | miR-4536-5p         | 1 |
| <i>circMVB12B</i> | miR-4540            | 1 |
| <i>circMVB12B</i> | miR-455-3p.2        | 1 |
| <i>circMVB12B</i> | miR-455-5p          | 1 |
| <i>circMVB12B</i> | miR-4633-3p/6500-5p | 1 |
| <i>circMVB12B</i> | miR-4633-5p         | 1 |
| <i>circMVB12B</i> | miR-4635            | 1 |
| <i>circMVB12B</i> | miR-4636            | 1 |
| <i>circMVB12B</i> | miR-4638-5p         | 1 |
| <i>circMVB12B</i> | miR-4639-3p         | 2 |
| <i>circMVB12B</i> | miR-4642            | 2 |
| <i>circMVB12B</i> | miR-4645-3p         | 1 |
| <i>circMVB12B</i> | miR-4645-5p/4673    | 1 |
| <i>circMVB12B</i> | miR-4652-3p         | 1 |
| <i>circMVB12B</i> | miR-4661-5p         | 1 |
| <i>circMVB12B</i> | miR-4662a-3p        | 2 |
| <i>circMVB12B</i> | miR-4666a-3p        | 1 |
| <i>circMVB12B</i> | miR-4667-3p         | 3 |
| <i>circMVB12B</i> | miR-4668-3p         | 3 |
| <i>circMVB12B</i> | miR-4670-3p         | 1 |
| <i>circMVB12B</i> | miR-4677-5p         | 3 |
| <i>circMVB12B</i> | miR-4680-5p         | 1 |
| <i>circMVB12B</i> | miR-4683            | 2 |
| <i>circMVB12B</i> | miR-4684-3p         | 3 |
| <i>circMVB12B</i> | miR-4684-5p         | 1 |
| <i>circMVB12B</i> | miR-4685-5p/6837-5p | 2 |
| <i>circMVB12B</i> | miR-4687-3p         | 2 |
| <i>circMVB12B</i> | miR-4689/6858-5p    | 2 |
| <i>circMVB12B</i> | miR-4690-5p         | 2 |
| <i>circMVB12B</i> | miR-4691-3p         | 2 |

|                   |                                  |   |
|-------------------|----------------------------------|---|
| <i>circMVB12B</i> | miR-4693-5p                      | 2 |
| <i>circMVB12B</i> | miR-4694-3p                      | 1 |
| <i>circMVB12B</i> | miR-4694-5p                      | 3 |
| <i>circMVB12B</i> | miR-4696                         | 1 |
| <i>circMVB12B</i> | miR-4698                         | 2 |
| <i>circMVB12B</i> | miR-4699-3p                      | 2 |
| <i>circMVB12B</i> | miR-4700-3p                      | 4 |
| <i>circMVB12B</i> | miR-4704-3p                      | 1 |
| <i>circMVB12B</i> | miR-4704-5p                      | 1 |
| <i>circMVB12B</i> | miR-4709-3p                      | 1 |
| <i>circMVB12B</i> | miR-4709-5p                      | 1 |
| <i>circMVB12B</i> | miR-4711-3p                      | 1 |
| <i>circMVB12B</i> | miR-4712-3p                      | 1 |
| <i>circMVB12B</i> | miR-4715-5p                      | 1 |
| <i>circMVB12B</i> | miR-4716-3p/6794-5p              | 1 |
| <i>circMVB12B</i> | miR-4717-3p                      | 1 |
| <i>circMVB12B</i> | miR-4717-5p                      | 1 |
| <i>circMVB12B</i> | miR-4718                         | 3 |
| <i>circMVB12B</i> | miR-4720-3p                      | 1 |
| <i>circMVB12B</i> | miR-4721                         | 1 |
| <i>circMVB12B</i> | miR-4722-3p/6727-3p              | 2 |
| <i>circMVB12B</i> | miR-4722-5p                      | 1 |
| <i>circMVB12B</i> | miR-4723-5p/5698/6870-5p/7111-5p | 1 |
| <i>circMVB12B</i> | miR-4724-5p                      | 2 |
| <i>circMVB12B</i> | miR-4725-5p                      | 1 |
| <i>circMVB12B</i> | miR-4726-3p                      | 1 |
| <i>circMVB12B</i> | miR-4727-3p                      | 1 |
| <i>circMVB12B</i> | miR-4729                         | 1 |
| <i>circMVB12B</i> | miR-4732-3p                      | 1 |
| <i>circMVB12B</i> | miR-4732-5p                      | 1 |
| <i>circMVB12B</i> | miR-4733-3p                      | 2 |
| <i>circMVB12B</i> | miR-4733-5p                      | 1 |
| <i>circMVB12B</i> | miR-4735-5p                      | 1 |
| <i>circMVB12B</i> | miR-4736                         | 2 |
| <i>circMVB12B</i> | miR-4738-3p                      | 3 |
| <i>circMVB12B</i> | miR-4739                         | 3 |
| <i>circMVB12B</i> | miR-4742-3p                      | 1 |
| <i>circMVB12B</i> | miR-4743-3p                      | 1 |



|                   |                     |   |
|-------------------|---------------------|---|
| <i>circMVB12B</i> | miR-4744            | 2 |
| <i>circMVB12B</i> | miR-4751            | 2 |
| <i>circMVB12B</i> | miR-4752            | 1 |
| <i>circMVB12B</i> | miR-4753-3p         | 1 |
| <i>circMVB12B</i> | miR-4753-5p         | 2 |
| <i>circMVB12B</i> | miR-4754            | 1 |
| <i>circMVB12B</i> | miR-4755-5p/5006-3p | 1 |
| <i>circMVB12B</i> | miR-4756-3p         | 3 |
| <i>circMVB12B</i> | miR-4757-5p/6744-3p | 2 |
| <i>circMVB12B</i> | miR-4760-3p         | 1 |
| <i>circMVB12B</i> | miR-4761-3p         | 2 |
| <i>circMVB12B</i> | miR-4764-3p         | 1 |
| <i>circMVB12B</i> | miR-4764-5p         | 1 |
| <i>circMVB12B</i> | miR-4765            | 1 |
| <i>circMVB12B</i> | miR-4766-5p         | 3 |
| <i>circMVB12B</i> | miR-4768-3p         | 1 |
| <i>circMVB12B</i> | miR-4768-5p/6833-3p | 1 |
| <i>circMVB12B</i> | miR-4771            | 1 |
| <i>circMVB12B</i> | miR-4772-3p         | 3 |
| <i>circMVB12B</i> | miR-4773            | 1 |
| <i>circMVB12B</i> | miR-4777-3p         | 1 |
| <i>circMVB12B</i> | miR-4777-5p         | 1 |
| <i>circMVB12B</i> | miR-4781-3p         | 1 |
| <i>circMVB12B</i> | miR-4789-5p         | 1 |
| <i>circMVB12B</i> | miR-4790-3p         | 2 |
| <i>circMVB12B</i> | miR-4795-5p         | 2 |
| <i>circMVB12B</i> | miR-4797-5p         | 6 |
| <i>circMVB12B</i> | miR-4798-3p         | 1 |
| <i>circMVB12B</i> | miR-4799-5p         | 3 |
| <i>circMVB12B</i> | miR-4802-5p         | 1 |
| <i>circMVB12B</i> | miR-4804-3p         | 1 |
| <i>circMVB12B</i> | miR-483-3p.1        | 2 |
| <i>circMVB12B</i> | miR-483-5p          | 1 |
| <i>circMVB12B</i> | miR-484/3155        | 3 |
| <i>circMVB12B</i> | miR-485-5p          | 2 |
| <i>circMVB12B</i> | miR-489-3p          | 2 |
| <i>circMVB12B</i> | miR-490-3p          | 1 |
| <i>circMVB12B</i> | miR-491-3p          | 1 |

|                   |                     |   |
|-------------------|---------------------|---|
| <i>circMVB12B</i> | miR-491-5p          | 1 |
| <i>circMVB12B</i> | miR-492             | 1 |
| <i>circMVB12B</i> | miR-493-5p          | 1 |
| <i>circMVB12B</i> | miR-495-3p          | 1 |
| <i>circMVB12B</i> | miR-495-5p          | 2 |
| <i>circMVB12B</i> | miR-497-3p          | 1 |
| <i>circMVB12B</i> | miR-4999-3p         | 2 |
| <i>circMVB12B</i> | miR-4999-5p         | 3 |
| <i>circMVB12B</i> | miR-499a-5p         | 1 |
| <i>circMVB12B</i> | miR-5000-3p         | 1 |
| <i>circMVB12B</i> | miR-5002-5p         | 1 |
| <i>circMVB12B</i> | miR-5003-3p         | 1 |
| <i>circMVB12B</i> | miR-5003-5p         | 2 |
| <i>circMVB12B</i> | miR-5004-5p         | 2 |
| <i>circMVB12B</i> | miR-5007-5p         | 1 |
| <i>circMVB12B</i> | miR-5009-5p/8058    | 1 |
| <i>circMVB12B</i> | miR-500b-3p         | 2 |
| <i>circMVB12B</i> | miR-5010-3p         | 1 |
| <i>circMVB12B</i> | miR-5010-5p         | 1 |
| <i>circMVB12B</i> | miR-5011-5p         | 1 |
| <i>circMVB12B</i> | miR-503-5p          | 2 |
| <i>circMVB12B</i> | miR-504-3p          | 1 |
| <i>circMVB12B</i> | miR-504-5p.1        | 1 |
| <i>circMVB12B</i> | miR-506-5p          | 1 |
| <i>circMVB12B</i> | miR-507/557         | 5 |
| <i>circMVB12B</i> | miR-508-3p          | 1 |
| <i>circMVB12B</i> | miR-5087            | 1 |
| <i>circMVB12B</i> | miR-5088-3p         | 1 |
| <i>circMVB12B</i> | miR-5088-5p         | 1 |
| <i>circMVB12B</i> | miR-5091            | 1 |
| <i>circMVB12B</i> | miR-5094            | 2 |
| <i>circMVB12B</i> | miR-510-3p          | 1 |
| <i>circMVB12B</i> | miR-511-5p          | 2 |
| <i>circMVB12B</i> | miR-512-3p          | 3 |
| <i>circMVB12B</i> | miR-512-5p          | 1 |
| <i>circMVB12B</i> | miR-513a-5p         | 1 |
| <i>circMVB12B</i> | miR-513c-5p/514b-5p | 1 |
| <i>circMVB12B</i> | miR-514a-3p         | 4 |

|                   |                                                                  |   |
|-------------------|------------------------------------------------------------------|---|
| <i>circMVB12B</i> | miR-515-5p/519e-5p                                               | 1 |
| <i>circMVB12B</i> | miR-5186                                                         | 1 |
| <i>circMVB12B</i> | miR-518a-5p/527                                                  | 1 |
| <i>circMVB12B</i> | miR-518c-5p                                                      | 2 |
| <i>circMVB12B</i> | miR-518d-5p/519-5p                                               | 1 |
| <i>circMVB12B</i> | miR-519-3p                                                       | 1 |
| <i>circMVB12B</i> | miR-5190                                                         | 2 |
| <i>circMVB12B</i> | miR-5193                                                         | 1 |
| <i>circMVB12B</i> | miR-5197-5p                                                      | 3 |
| <i>circMVB12B</i> | miR-519d-5p                                                      | 2 |
| <i>circMVB12B</i> | miR-520f-5p                                                      | 1 |
| <i>circMVB12B</i> | miR-521                                                          | 2 |
| <i>circMVB12B</i> | miR-522-3p                                                       | 1 |
| <i>circMVB12B</i> | miR-524-5p                                                       | 2 |
| <i>circMVB12B</i> | miR-526b-5p                                                      | 1 |
| <i>circMVB12B</i> | miR-539-3p                                                       | 1 |
| <i>circMVB12B</i> | miR-542-3p                                                       | 1 |
| <i>circMVB12B</i> | miR-543                                                          | 1 |
| <i>circMVB12B</i> | miR-544b                                                         | 1 |
| <i>circMVB12B</i> | miR-545-5p                                                       | 1 |
| <i>circMVB12B</i> | miR-548ac/548bb-3p/548d-3p/548h-3p/548z                          |   |
| <i>circMVB12B</i> | miR-548ah-5p/3609                                                | 1 |
| <i>circMVB12B</i> | miR-548aj-5p/548f-5p/548g-5p/548x-5p                             | 1 |
| <i>circMVB12B</i> | miR-548al/4445-3p                                                | 1 |
| <i>circMVB12B</i> | miR-548ao-3p                                                     | 2 |
| <i>circMVB12B</i> | miR-548ap-3p/548aa/548t-3p                                       | 1 |
| <i>circMVB12B</i> | miR-548aq-3p/548am-3p/548aj-3p/548ah-3p/548ae-3p/548j-3p/548x-3p |   |
| <i>circMVB12B</i> | miR-548as-3p                                                     | 1 |
| <i>circMVB12B</i> | miR-548at-5p                                                     | 1 |
| <i>circMVB12B</i> | miR-548av-3p                                                     | 4 |
| <i>circMVB12B</i> | miR-548aw                                                        | 1 |
| <i>circMVB12B</i> | miR-548ay-3p/548at-3p                                            | 1 |
| <i>circMVB12B</i> | miR-548az-3p/548ar-3p/548a-3p/548e-3p/548f-3p                    |   |
| <i>circMVB12B</i> | miR-548b-3p                                                      | 1 |
| <i>circMVB12B</i> | miR-548c-3p                                                      | 1 |
| <i>circMVB12B</i> | miR-548p                                                         | 2 |
| <i>circMVB12B</i> | miR-548q                                                         | 3 |
| <i>circMVB12B</i> | miR-548s                                                         | 1 |

|                   |                               |   |
|-------------------|-------------------------------|---|
| <i>circMVB12B</i> | miR-548u/7161-5p              | 1 |
| <i>circMVB12B</i> | miR-549a                      | 1 |
| <i>circMVB12B</i> | miR-550a-3-5p/550a-5p/1271-3p | 1 |
| <i>circMVB12B</i> | miR-550b-2-5p                 | 1 |
| <i>circMVB12B</i> | miR-550b-3p                   | 1 |
| <i>circMVB12B</i> | miR-551b-5p                   | 2 |
| <i>circMVB12B</i> | miR-552-5p                    | 1 |
| <i>circMVB12B</i> | miR-556-3p                    | 1 |
| <i>circMVB12B</i> | miR-5571-3p                   | 1 |
| <i>circMVB12B</i> | miR-558                       | 3 |
| <i>circMVB12B</i> | miR-5580-3p                   | 1 |
| <i>circMVB12B</i> | miR-5580-5p                   | 1 |
| <i>circMVB12B</i> | miR-5582-3p                   | 4 |
| <i>circMVB12B</i> | miR-5585-3p                   | 1 |
| <i>circMVB12B</i> | miR-5589-3p                   | 1 |
| <i>circMVB12B</i> | miR-5591-3p                   | 2 |
| <i>circMVB12B</i> | miR-561-3p                    | 1 |
| <i>circMVB12B</i> | miR-567                       | 1 |
| <i>circMVB12B</i> | miR-568                       | 1 |
| <i>circMVB12B</i> | miR-5680                      | 1 |
| <i>circMVB12B</i> | miR-5683                      | 1 |
| <i>circMVB12B</i> | miR-5689                      | 1 |
| <i>circMVB12B</i> | miR-5691                      | 1 |
| <i>circMVB12B</i> | miR-5695                      | 2 |
| <i>circMVB12B</i> | miR-5696                      | 1 |
| <i>circMVB12B</i> | miR-5697                      | 2 |
| <i>circMVB12B</i> | miR-570-3p                    | 1 |
| <i>circMVB12B</i> | miR-5701                      | 1 |
| <i>circMVB12B</i> | miR-571                       | 1 |
| <i>circMVB12B</i> | miR-573/3616-5p               | 1 |
| <i>circMVB12B</i> | miR-5739                      | 1 |
| <i>circMVB12B</i> | miR-576-3p                    | 1 |
| <i>circMVB12B</i> | miR-576-5p                    | 2 |
| <i>circMVB12B</i> | miR-579-3p                    | 1 |
| <i>circMVB12B</i> | miR-580-3p                    | 1 |
| <i>circMVB12B</i> | miR-588                       | 1 |
| <i>circMVB12B</i> | miR-589-3p                    | 1 |
| <i>circMVB12B</i> | miR-589-5p                    | 1 |

|                   |                                      |   |
|-------------------|--------------------------------------|---|
| <i>circMVB12B</i> | miR-590-3p                           | 3 |
| <i>circMVB12B</i> | miR-592                              | 1 |
| <i>circMVB12B</i> | miR-595                              | 3 |
| <i>circMVB12B</i> | miR-599                              | 1 |
| <i>circMVB12B</i> | miR-600                              | 1 |
| <i>circMVB12B</i> | miR-603                              | 3 |
| <i>circMVB12B</i> | miR-604                              | 1 |
| <i>circMVB12B</i> | miR-607                              | 1 |
| <i>circMVB12B</i> | miR-6072/6891-3p                     | 1 |
| <i>circMVB12B</i> | miR-6074                             | 1 |
| <i>circMVB12B</i> | miR-6077                             | 1 |
| <i>circMVB12B</i> | miR-6079                             | 2 |
| <i>circMVB12B</i> | miR-6080                             | 1 |
| <i>circMVB12B</i> | miR-6081                             | 1 |
| <i>circMVB12B</i> | miR-6083                             | 2 |
| <i>circMVB12B</i> | miR-6090                             | 3 |
| <i>circMVB12B</i> | miR-612/1285-3p/3187-5p/5189-5p/6860 | 1 |
| <i>circMVB12B</i> | miR-6125                             | 1 |
| <i>circMVB12B</i> | miR-6131                             | 2 |
| <i>circMVB12B</i> | miR-6132/6836-5p                     | 2 |
| <i>circMVB12B</i> | miR-6134                             | 2 |
| <i>circMVB12B</i> | miR-6165                             | 2 |
| <i>circMVB12B</i> | miR-618                              | 2 |
| <i>circMVB12B</i> | miR-619-3p                           | 1 |
| <i>circMVB12B</i> | miR-621                              | 1 |
| <i>circMVB12B</i> | miR-623                              | 1 |
| <i>circMVB12B</i> | miR-624-3p                           | 1 |
| <i>circMVB12B</i> | miR-625-3p                           | 1 |
| <i>circMVB12B</i> | miR-625-5p                           | 1 |
| <i>circMVB12B</i> | miR-628-5p                           | 1 |
| <i>circMVB12B</i> | miR-629-5p                           | 1 |
| <i>circMVB12B</i> | miR-634                              | 1 |
| <i>circMVB12B</i> | miR-641/3617-5p                      | 2 |
| <i>circMVB12B</i> | miR-642-3p                           | 3 |
| <i>circMVB12B</i> | miR-646                              | 2 |
| <i>circMVB12B</i> | miR-647                              | 1 |
| <i>circMVB12B</i> | miR-649                              | 1 |
| <i>circMVB12B</i> | miR-6500-3p                          | 1 |

|                   |                     |   |
|-------------------|---------------------|---|
| <i>circMVB12B</i> | miR-6501-3p         | 2 |
| <i>circMVB12B</i> | miR-6502-3p         | 2 |
| <i>circMVB12B</i> | miR-6504-3p         | 2 |
| <i>circMVB12B</i> | miR-6507-3p         | 1 |
| <i>circMVB12B</i> | miR-6507-5p         | 1 |
| <i>circMVB12B</i> | miR-6509-3p         | 1 |
| <i>circMVB12B</i> | miR-651-3p          | 1 |
| <i>circMVB12B</i> | miR-6510-5p         | 2 |
| <i>circMVB12B</i> | miR-6511-3p         | 4 |
| <i>circMVB12B</i> | miR-6511-5p         | 1 |
| <i>circMVB12B</i> | miR-6513-3p         | 5 |
| <i>circMVB12B</i> | miR-6514-3p         | 2 |
| <i>circMVB12B</i> | miR-6514-5p         | 1 |
| <i>circMVB12B</i> | miR-6516-3p         | 1 |
| <i>circMVB12B</i> | miR-6516-5p         | 4 |
| <i>circMVB12B</i> | miR-652-3p          | 1 |
| <i>circMVB12B</i> | miR-652-5p          | 1 |
| <i>circMVB12B</i> | miR-656-3p          | 2 |
| <i>circMVB12B</i> | miR-658             | 2 |
| <i>circMVB12B</i> | miR-659-3p          | 1 |
| <i>circMVB12B</i> | miR-659-5p          | 1 |
| <i>circMVB12B</i> | miR-660-3p          | 1 |
| <i>circMVB12B</i> | miR-660-5p          | 1 |
| <i>circMVB12B</i> | miR-661             | 1 |
| <i>circMVB12B</i> | miR-662             | 1 |
| <i>circMVB12B</i> | miR-664a-3p         | 1 |
| <i>circMVB12B</i> | miR-664a-5p/4794    | 1 |
| <i>circMVB12B</i> | miR-670-5p          | 1 |
| <i>circMVB12B</i> | miR-671-3p          | 1 |
| <i>circMVB12B</i> | miR-671-5p          | 2 |
| <i>circMVB12B</i> | miR-6715a-3p        | 1 |
| <i>circMVB12B</i> | miR-6719-3p         | 2 |
| <i>circMVB12B</i> | miR-6720-5p         | 1 |
| <i>circMVB12B</i> | miR-6721-5p         | 2 |
| <i>circMVB12B</i> | miR-6723-5p         | 1 |
| <i>circMVB12B</i> | miR-6724-5p/6773-5p | 2 |
| <i>circMVB12B</i> | miR-6726-3p         | 1 |
| <i>circMVB12B</i> | miR-6730-3p         | 2 |

|                   |                     |   |
|-------------------|---------------------|---|
| <i>circMVB12B</i> | miR-6731-3p         | 2 |
| <i>circMVB12B</i> | miR-6731-5p/8085    | 1 |
| <i>circMVB12B</i> | miR-6732-5p         | 1 |
| <i>circMVB12B</i> | miR-6736-3p         | 2 |
| <i>circMVB12B</i> | miR-6739-3p         | 2 |
| <i>circMVB12B</i> | miR-6742-3p         | 3 |
| <i>circMVB12B</i> | miR-6742-5p         | 1 |
| <i>circMVB12B</i> | miR-6747-3p         | 2 |
| <i>circMVB12B</i> | miR-6750-3p         | 2 |
| <i>circMVB12B</i> | miR-6752-3p         | 1 |
| <i>circMVB12B</i> | miR-6753-5p         | 1 |
| <i>circMVB12B</i> | miR-6757-3p         | 1 |
| <i>circMVB12B</i> | miR-6758-3p         | 3 |
| <i>circMVB12B</i> | miR-6758-5p/6856-5p | 1 |
| <i>circMVB12B</i> | miR-6759-3p         | 1 |
| <i>circMVB12B</i> | miR-6760-5p         | 3 |
| <i>circMVB12B</i> | miR-6762-3p         | 1 |
| <i>circMVB12B</i> | miR-6764-3p/6824-3p | 2 |
| <i>circMVB12B</i> | miR-6765-3p         | 2 |
| <i>circMVB12B</i> | miR-6767-3p         | 2 |
| <i>circMVB12B</i> | miR-6771-3p         | 1 |
| <i>circMVB12B</i> | miR-6771-5p         | 1 |
| <i>circMVB12B</i> | miR-6772-3p         | 3 |
| <i>circMVB12B</i> | miR-6773-3p         | 1 |
| <i>circMVB12B</i> | miR-6774-3p         | 1 |
| <i>circMVB12B</i> | miR-6776-3p         | 1 |
| <i>circMVB12B</i> | miR-6776-5p         | 1 |
| <i>circMVB12B</i> | miR-6777-3p         | 1 |
| <i>circMVB12B</i> | miR-6780a-3p        | 1 |
| <i>circMVB12B</i> | miR-6782-5p         | 1 |
| <i>circMVB12B</i> | miR-6784-3p/6862-3p | 4 |
| <i>circMVB12B</i> | miR-6786-5p         | 1 |
| <i>circMVB12B</i> | miR-6787-3p         | 3 |
| <i>circMVB12B</i> | miR-6789-5p         | 1 |
| <i>circMVB12B</i> | miR-6798-5p         | 1 |
| <i>circMVB12B</i> | miR-6799-5p         | 1 |
| <i>circMVB12B</i> | miR-6800-3p         | 1 |
| <i>circMVB12B</i> | miR-6802-3p         | 3 |

|                   |                     |   |
|-------------------|---------------------|---|
| <i>circMVB12B</i> | miR-6805-5p         | 1 |
| <i>circMVB12B</i> | miR-6809-3p         | 1 |
| <i>circMVB12B</i> | miR-6812-3p         | 1 |
| <i>circMVB12B</i> | miR-6814-5p         | 1 |
| <i>circMVB12B</i> | miR-6815-5p/6865-5p | 2 |
| <i>circMVB12B</i> | miR-6816-3p         | 1 |
| <i>circMVB12B</i> | miR-6817-3p         | 2 |
| <i>circMVB12B</i> | miR-6824-5p         | 1 |
| <i>circMVB12B</i> | miR-6828-5p         | 2 |
| <i>circMVB12B</i> | miR-6830-5p         | 1 |
| <i>circMVB12B</i> | miR-6832-3p         | 1 |
| <i>circMVB12B</i> | miR-6832-5p         | 1 |
| <i>circMVB12B</i> | miR-6833-5p         | 1 |
| <i>circMVB12B</i> | miR-6834-3p         | 2 |
| <i>circMVB12B</i> | miR-6836-3p         | 2 |
| <i>circMVB12B</i> | miR-6838-3p         | 1 |
| <i>circMVB12B</i> | miR-6840-3p         | 1 |
| <i>circMVB12B</i> | miR-6841-3p         | 2 |
| <i>circMVB12B</i> | miR-6842-3p         | 1 |
| <i>circMVB12B</i> | miR-6845-3p         | 1 |
| <i>circMVB12B</i> | miR-6846-3p         | 1 |
| <i>circMVB12B</i> | miR-6847-3p         | 1 |
| <i>circMVB12B</i> | miR-6849-3p         | 1 |
| <i>circMVB12B</i> | miR-6850-5p         | 1 |
| <i>circMVB12B</i> | miR-6851-3p         | 1 |
| <i>circMVB12B</i> | miR-6852-5p         | 3 |
| <i>circMVB12B</i> | miR-6853-3p         | 1 |
| <i>circMVB12B</i> | miR-6854-5p         | 1 |
| <i>circMVB12B</i> | miR-6857-3p         | 1 |
| <i>circMVB12B</i> | miR-6859-3p         | 1 |
| <i>circMVB12B</i> | miR-6861-3p         | 1 |
| <i>circMVB12B</i> | miR-6861-5p         | 1 |
| <i>circMVB12B</i> | miR-6865-3p         | 1 |
| <i>circMVB12B</i> | miR-6873-3p         | 2 |
| <i>circMVB12B</i> | miR-6874-5p         | 1 |
| <i>circMVB12B</i> | miR-6878-3p         | 1 |
| <i>circMVB12B</i> | miR-6878-5p         | 1 |
| <i>circMVB12B</i> | miR-6879-3p         | 1 |



|                   |             |   |
|-------------------|-------------|---|
| <i>circMVB12B</i> | miR-6881-3p | 1 |
| <i>circMVB12B</i> | miR-6881-5p | 1 |
| <i>circMVB12B</i> | miR-6882-3p | 3 |
| <i>circMVB12B</i> | miR-6882-5p | 2 |
| <i>circMVB12B</i> | miR-6883-3p | 1 |
| <i>circMVB12B</i> | miR-6884-3p | 1 |
| <i>circMVB12B</i> | miR-6885-3p | 1 |
| <i>circMVB12B</i> | miR-6886-3p | 3 |
| <i>circMVB12B</i> | miR-6888-3p | 1 |
| <i>circMVB12B</i> | miR-6888-5p | 1 |
| <i>circMVB12B</i> | miR-6890-3p | 1 |
| <i>circMVB12B</i> | miR-6894-3p | 2 |
| <i>circMVB12B</i> | miR-6894-5p | 1 |
| <i>circMVB12B</i> | miR-7-3p    | 1 |
| <i>circMVB12B</i> | miR-7-5p    | 1 |
| <i>circMVB12B</i> | miR-708-3p  | 1 |
| <i>circMVB12B</i> | miR-7106-5p | 1 |
| <i>circMVB12B</i> | miR-7109-3p | 2 |
| <i>circMVB12B</i> | miR-711     | 1 |
| <i>circMVB12B</i> | miR-7110-3p | 2 |
| <i>circMVB12B</i> | miR-7111-3p | 1 |
| <i>circMVB12B</i> | miR-7113-5p | 2 |
| <i>circMVB12B</i> | miR-7114-5p | 1 |
| <i>circMVB12B</i> | miR-7150    | 1 |
| <i>circMVB12B</i> | miR-7153-3p | 1 |
| <i>circMVB12B</i> | miR-7154-3p | 1 |
| <i>circMVB12B</i> | miR-7156-3p | 1 |
| <i>circMVB12B</i> | miR-744-3p  | 2 |
| <i>circMVB12B</i> | miR-759     | 2 |
| <i>circMVB12B</i> | miR-765     | 1 |
| <i>circMVB12B</i> | miR-766-3p  | 2 |
| <i>circMVB12B</i> | miR-766-5p  | 1 |
| <i>circMVB12B</i> | miR-767-3p  | 3 |
| <i>circMVB12B</i> | miR-7705    | 1 |
| <i>circMVB12B</i> | miR-7844-5p | 4 |
| <i>circMVB12B</i> | miR-7845-5p | 1 |
| <i>circMVB12B</i> | miR-7848-3p | 2 |
| <i>circMVB12B</i> | miR-7849-3p | 2 |

|                   |                              |   |
|-------------------|------------------------------|---|
| <i>circMVB12B</i> | miR-7851-3p                  | 1 |
| <i>circMVB12B</i> | miR-7852-3p                  | 1 |
| <i>circMVB12B</i> | miR-7854-3p                  | 2 |
| <i>circMVB12B</i> | miR-7855-5p                  | 1 |
| <i>circMVB12B</i> | miR-7856-5p                  | 1 |
| <i>circMVB12B</i> | miR-7973                     | 1 |
| <i>circMVB12B</i> | miR-7974                     | 2 |
| <i>circMVB12B</i> | miR-7975                     | 1 |
| <i>circMVB12B</i> | miR-7977                     | 1 |
| <i>circMVB12B</i> | miR-7978                     | 3 |
| <i>circMVB12B</i> | miR-802                      | 1 |
| <i>circMVB12B</i> | miR-8056                     | 2 |
| <i>circMVB12B</i> | miR-8057                     | 3 |
| <i>circMVB12B</i> | miR-8062                     | 4 |
| <i>circMVB12B</i> | miR-8063                     | 2 |
| <i>circMVB12B</i> | miR-8068                     | 2 |
| <i>circMVB12B</i> | miR-8074                     | 1 |
| <i>circMVB12B</i> | miR-8076                     | 1 |
| <i>circMVB12B</i> | miR-8080                     | 1 |
| <i>circMVB12B</i> | miR-8084                     | 1 |
| <i>circMVB12B</i> | miR-8087                     | 1 |
| <i>circMVB12B</i> | miR-8485                     | 3 |
| <i>circMVB12B</i> | miR-873-3p                   | 2 |
| <i>circMVB12B</i> | miR-873-5p.1                 | 2 |
| <i>circMVB12B</i> | miR-873-5p.2                 | 1 |
| <i>circMVB12B</i> | miR-874-3p                   | 2 |
| <i>circMVB12B</i> | miR-875-5p                   | 1 |
| <i>circMVB12B</i> | miR-876-3p                   | 3 |
| <i>circMVB12B</i> | miR-877-3p                   | 1 |
| <i>circMVB12B</i> | miR-888-5p                   | 1 |
| <i>circMVB12B</i> | miR-889-5p                   | 2 |
| <i>circMVB12B</i> | miR-890                      | 1 |
| <i>circMVB12B</i> | miR-891a-3p                  | 1 |
| <i>circMVB12B</i> | miR-892-5p                   | 1 |
| <i>circMVB12B</i> | miR-892b                     | 1 |
| <i>circMVB12B</i> | miR-920/4300/5591-5p/6726-5p | 3 |
| <i>circMVB12B</i> | miR-921                      | 1 |
| <i>circMVB12B</i> | miR-922                      | 5 |

|                   |                    |   |
|-------------------|--------------------|---|
| <i>circMVB12B</i> | miR-938            | 3 |
| <i>circMVB12B</i> | miR-939-3p         | 3 |
| <i>circMVB12B</i> | miR-942-3p         | 1 |
| <i>circMVB12B</i> | miR-942-5p         | 1 |
| <i>circMVB12B</i> | miR-944            | 4 |
| <i>circMVB12B</i> | miR-96-3p          | 1 |
| <i>circMVB12B</i> | miR-96-5p/1271-5p  | 2 |
| <i>circNARS2</i>  | miR-103b           | 1 |
| <i>circNARS2</i>  | miR-1197           | 1 |
| <i>circNARS2</i>  | miR-1200           | 1 |
| <i>circNARS2</i>  | miR-1203           | 1 |
| <i>circNARS2</i>  | miR-1208           | 2 |
| <i>circNARS2</i>  | miR-1226-5p        | 2 |
| <i>circNARS2</i>  | miR-1228-3p        | 1 |
| <i>circNARS2</i>  | miR-127-5p         | 3 |
| <i>circNARS2</i>  | miR-1270           | 1 |
| <i>circNARS2</i>  | miR-1272           | 1 |
| <i>circNARS2</i>  | miR-1276           | 1 |
| <i>circNARS2</i>  | miR-1283           | 1 |
| <i>circNARS2</i>  | miR-1288-3p        | 2 |
| <i>circNARS2</i>  | miR-1291/6775-3p   | 2 |
| <i>circNARS2</i>  | miR-1322           | 1 |
| <i>circNARS2</i>  | miR-133a-3p.1      | 1 |
| <i>circNARS2</i>  | miR-133a-3p.2/133b | 1 |
| <i>circNARS2</i>  | miR-138-1-3p       | 1 |
| <i>circNARS2</i>  | miR-139-3p         | 1 |
| <i>circNARS2</i>  | miR-141-3p/200-3p  | 2 |
| <i>circNARS2</i>  | miR-152-5p         | 1 |
| <i>circNARS2</i>  | miR-181a-2-3p      | 1 |
| <i>circNARS2</i>  | miR-182-3p         | 1 |
| <i>circNARS2</i>  | miR-1827           | 1 |
| <i>circNARS2</i>  | miR-187-5p         | 1 |
| <i>circNARS2</i>  | miR-192-5p/215-5p  | 2 |
| <i>circNARS2</i>  | miR-194-3p         | 1 |
| <i>circNARS2</i>  | miR-196a-3p        | 2 |
| <i>circNARS2</i>  | miR-196b-3p        | 1 |
| <i>circNARS2</i>  | miR-200ab-5p       | 1 |
| <i>circNARS2</i>  | miR-203b-3p        | 1 |

|                  |                       |   |
|------------------|-----------------------|---|
| <i>circNARS2</i> | miR-208-5p            | 1 |
| <i>circNARS2</i> | miR-2117              | 1 |
| <i>circNARS2</i> | miR-215-3p            | 1 |
| <i>circNARS2</i> | miR-218-1-3p          | 1 |
| <i>circNARS2</i> | miR-218-2-3p          | 1 |
| <i>circNARS2</i> | miR-221-3p/222-3p     | 1 |
| <i>circNARS2</i> | miR-221-5p/8073       | 2 |
| <i>circNARS2</i> | miR-2277-3p           | 1 |
| <i>circNARS2</i> | miR-2467-3p           | 2 |
| <i>circNARS2</i> | miR-26-5p             | 1 |
| <i>circNARS2</i> | miR-2681-5p           | 1 |
| <i>circNARS2</i> | miR-26b-3p            | 1 |
| <i>circNARS2</i> | miR-27b-5p            | 1 |
| <i>circNARS2</i> | miR-29-3p             | 1 |
| <i>circNARS2</i> | miR-29b-1-5p          | 1 |
| <i>circNARS2</i> | miR-302a-5p           | 1 |
| <i>circNARS2</i> | miR-302c-5p           | 2 |
| <i>circNARS2</i> | miR-3065-3p           | 1 |
| <i>circNARS2</i> | miR-3065-5p           | 1 |
| <i>circNARS2</i> | miR-3120-5p           | 2 |
| <i>circNARS2</i> | miR-3121-5p           | 1 |
| <i>circNARS2</i> | miR-3125/3916/6859-5p | 2 |
| <i>circNARS2</i> | miR-3126-5p           | 2 |
| <i>circNARS2</i> | miR-3128              | 1 |
| <i>circNARS2</i> | miR-3140-3p           | 1 |
| <i>circNARS2</i> | miR-3140-5p           | 1 |
| <i>circNARS2</i> | miR-3146              | 1 |
| <i>circNARS2</i> | miR-3160-3p           | 1 |
| <i>circNARS2</i> | miR-3170/6855-5p      | 2 |
| <i>circNARS2</i> | miR-3176/3922-3p      | 1 |
| <i>circNARS2</i> | miR-3187-3p           | 1 |
| <i>circNARS2</i> | miR-3190-5p           | 1 |
| <i>circNARS2</i> | miR-324-5p            | 1 |
| <i>circNARS2</i> | miR-328-3p            | 2 |
| <i>circNARS2</i> | miR-330-3p.2          | 1 |
| <i>circNARS2</i> | miR-33a-3p            | 1 |
| <i>circNARS2</i> | miR-342-5p/4664-5p    | 2 |
| <i>circNARS2</i> | miR-345-3p            | 1 |

|                  |                           |   |
|------------------|---------------------------|---|
| <i>circNARS2</i> | miR-345-5p                | 2 |
| <i>circNARS2</i> | miR-3529-3p               | 1 |
| <i>circNARS2</i> | miR-3612                  | 1 |
| <i>circNARS2</i> | miR-3614-3p               | 3 |
| <i>circNARS2</i> | miR-3622a-3p/3622b-3p     | 2 |
| <i>circNARS2</i> | miR-3622a-5p              | 1 |
| <i>circNARS2</i> | miR-3662                  | 1 |
| <i>circNARS2</i> | miR-3664-5p               | 1 |
| <i>circNARS2</i> | miR-3667-3p               | 1 |
| <i>circNARS2</i> | miR-3675-5p               | 1 |
| <i>circNARS2</i> | miR-3681-5p               | 1 |
| <i>circNARS2</i> | miR-3688-5p               | 2 |
| <i>circNARS2</i> | miR-371-5p                | 1 |
| <i>circNARS2</i> | miR-371b-5p/373-5p/616-5p | 1 |
| <i>circNARS2</i> | miR-372-5p                | 1 |
| <i>circNARS2</i> | miR-375                   | 1 |
| <i>circNARS2</i> | miR-376-3p                | 1 |
| <i>circNARS2</i> | miR-378a-5p               | 1 |
| <i>circNARS2</i> | miR-383-3p                | 1 |
| <i>circNARS2</i> | miR-3907                  | 2 |
| <i>circNARS2</i> | miR-3914                  | 1 |
| <i>circNARS2</i> | miR-3919                  | 2 |
| <i>circNARS2</i> | miR-3922-5p               | 1 |
| <i>circNARS2</i> | miR-3926                  | 1 |
| <i>circNARS2</i> | miR-3928-3p               | 1 |
| <i>circNARS2</i> | miR-3976                  | 1 |
| <i>circNARS2</i> | miR-409-3p                | 1 |
| <i>circNARS2</i> | miR-412-3p/6754-3p        | 1 |
| <i>circNARS2</i> | miR-4255                  | 1 |
| <i>circNARS2</i> | miR-4257                  | 1 |
| <i>circNARS2</i> | miR-4274                  | 1 |
| <i>circNARS2</i> | miR-4282                  | 1 |
| <i>circNARS2</i> | miR-4290                  | 2 |
| <i>circNARS2</i> | miR-4291                  | 1 |
| <i>circNARS2</i> | miR-4297/5581-5p          | 1 |
| <i>circNARS2</i> | miR-4299                  | 2 |
| <i>circNARS2</i> | miR-4311                  | 1 |
| <i>circNARS2</i> | miR-4318                  | 2 |

|                  |                                    |   |
|------------------|------------------------------------|---|
| <i>circNARS2</i> | miR-4330                           | 1 |
| <i>circNARS2</i> | miR-4419a/4510/6127/6129/6130/6133 | 2 |
| <i>circNARS2</i> | miR-4421/5699-3p                   | 2 |
| <i>circNARS2</i> | miR-4422                           | 1 |
| <i>circNARS2</i> | miR-4426/4647/4662b                | 3 |
| <i>circNARS2</i> | miR-4435                           | 1 |
| <i>circNARS2</i> | miR-4456                           | 2 |
| <i>circNARS2</i> | miR-4474-3p                        | 2 |
| <i>circNARS2</i> | miR-4477a                          | 2 |
| <i>circNARS2</i> | miR-4487                           | 1 |
| <i>circNARS2</i> | miR-4513/6855-3p                   | 2 |
| <i>circNARS2</i> | miR-4515                           | 2 |
| <i>circNARS2</i> | miR-4519                           | 1 |
| <i>circNARS2</i> | miR-452-5p/892-3p                  | 1 |
| <i>circNARS2</i> | miR-4531                           | 1 |
| <i>circNARS2</i> | miR-4537                           | 1 |
| <i>circNARS2</i> | miR-4539                           | 2 |
| <i>circNARS2</i> | miR-4639-5p                        | 1 |
| <i>circNARS2</i> | miR-4666a-5p                       | 2 |
| <i>circNARS2</i> | miR-4680-5p                        | 1 |
| <i>circNARS2</i> | miR-4683                           | 1 |
| <i>circNARS2</i> | miR-4698                           | 1 |
| <i>circNARS2</i> | miR-4699-5p                        | 3 |
| <i>circNARS2</i> | miR-4709-3p                        | 3 |
| <i>circNARS2</i> | miR-4714-5p                        | 1 |
| <i>circNARS2</i> | miR-4719                           | 1 |
| <i>circNARS2</i> | miR-4720-5p/4799-3p/5588-5p        | 1 |
| <i>circNARS2</i> | miR-4724-3p                        | 1 |
| <i>circNARS2</i> | miR-4724-5p                        | 3 |
| <i>circNARS2</i> | miR-4733-5p                        | 1 |
| <i>circNARS2</i> | miR-4740-5p                        | 2 |
| <i>circNARS2</i> | miR-4750-3p                        | 2 |
| <i>circNARS2</i> | miR-4751                           | 1 |
| <i>circNARS2</i> | miR-4756-3p                        | 2 |
| <i>circNARS2</i> | miR-4760-3p                        | 1 |
| <i>circNARS2</i> | miR-4766-5p                        | 1 |
| <i>circNARS2</i> | miR-4768-5p/6833-3p                | 1 |
| <i>circNARS2</i> | miR-4773                           | 1 |

|                  |                                                                  |   |
|------------------|------------------------------------------------------------------|---|
| <i>circNARS2</i> | miR-4781-3p                                                      | 1 |
| <i>circNARS2</i> | miR-4788                                                         | 2 |
| <i>circNARS2</i> | miR-4803                                                         | 3 |
| <i>circNARS2</i> | miR-498                                                          | 1 |
| <i>circNARS2</i> | miR-5003-3p                                                      | 1 |
| <i>circNARS2</i> | miR-5004-5p                                                      | 1 |
| <i>circNARS2</i> | miR-511-5p                                                       | 2 |
| <i>circNARS2</i> | miR-513b-3p                                                      | 1 |
| <i>circNARS2</i> | miR-513b-5p                                                      | 1 |
| <i>circNARS2</i> | miR-513c-5p/514b-5p                                              | 1 |
| <i>circNARS2</i> | miR-514a-3p                                                      | 1 |
| <i>circNARS2</i> | miR-514a-5p                                                      | 1 |
| <i>circNARS2</i> | miR-5186                                                         | 1 |
| <i>circNARS2</i> | miR-541-5p                                                       | 2 |
| <i>circNARS2</i> | miR-548ac/548bb-3p/548d-3p/548h-3p/548z                          | 1 |
| <i>circNARS2</i> | miR-548aq-3p/548am-3p/548aj-3p/548ah-3p/548ae-3p/548j-3p/548x-3p | 1 |
| <i>circNARS2</i> | miR-548av-5p/548k/8054                                           | 2 |
| <i>circNARS2</i> | miR-548ay-5p/548au-5p/548as-5p/548ar-3p/548aq-5p/548ap-5p/548am- | 1 |
| <i>circNARS2</i> | miR-548az-5p/548t-5p                                             | 2 |
| <i>circNARS2</i> | miR-548l                                                         | 2 |
| <i>circNARS2</i> | miR-548n                                                         | 2 |
| <i>circNARS2</i> | miR-548q                                                         | 2 |
| <i>circNARS2</i> | miR-548s                                                         | 1 |
| <i>circNARS2</i> | miR-548v                                                         | 1 |
| <i>circNARS2</i> | miR-5571-5p                                                      | 1 |
| <i>circNARS2</i> | miR-558                                                          | 1 |
| <i>circNARS2</i> | miR-5580-3p                                                      | 1 |
| <i>circNARS2</i> | miR-5582-5p                                                      | 1 |
| <i>circNARS2</i> | miR-561-5p                                                       | 1 |
| <i>circNARS2</i> | miR-5682                                                         | 1 |
| <i>circNARS2</i> | miR-5683                                                         | 1 |
| <i>circNARS2</i> | miR-5687                                                         | 1 |
| <i>circNARS2</i> | miR-5693                                                         | 1 |
| <i>circNARS2</i> | miR-576-3p                                                       | 1 |
| <i>circNARS2</i> | miR-580-5p                                                       | 1 |
| <i>circNARS2</i> | miR-582-3p                                                       | 2 |
| <i>circNARS2</i> | miR-583                                                          | 1 |
| <i>circNARS2</i> | miR-585-5p                                                       | 1 |

|                  |                             |   |
|------------------|-----------------------------|---|
| <i>circNARS2</i> | miR-588                     | 1 |
| <i>circNARS2</i> | miR-589-3p                  | 1 |
| <i>circNARS2</i> | miR-593-5p                  | 1 |
| <i>circNARS2</i> | miR-595                     | 1 |
| <i>circNARS2</i> | miR-597-3p                  | 1 |
| <i>circNARS2</i> | miR-6072/6891-3p            | 1 |
| <i>circNARS2</i> | miR-608/4651                | 2 |
| <i>circNARS2</i> | miR-6083                    | 1 |
| <i>circNARS2</i> | miR-615-3p                  | 1 |
| <i>circNARS2</i> | miR-618                     | 1 |
| <i>circNARS2</i> | miR-619-3p                  | 4 |
| <i>circNARS2</i> | miR-624-5p                  | 2 |
| <i>circNARS2</i> | miR-628-5p                  | 2 |
| <i>circNARS2</i> | miR-6499-3p                 | 1 |
| <i>circNARS2</i> | miR-6501-3p                 | 1 |
| <i>circNARS2</i> | miR-6512-5p                 | 1 |
| <i>circNARS2</i> | miR-6513-3p                 | 1 |
| <i>circNARS2</i> | miR-664a-3p                 | 1 |
| <i>circNARS2</i> | miR-6729-3p                 | 1 |
| <i>circNARS2</i> | miR-6734-3p                 | 1 |
| <i>circNARS2</i> | miR-6734-5p                 | 2 |
| <i>circNARS2</i> | miR-6737-5p/6812-5p/6819-5p | 2 |
| <i>circNARS2</i> | miR-6740-3p                 | 2 |
| <i>circNARS2</i> | miR-6747-5p                 | 2 |
| <i>circNARS2</i> | miR-6748-3p                 | 2 |
| <i>circNARS2</i> | miR-6757-5p                 | 2 |
| <i>circNARS2</i> | miR-6759-3p                 | 1 |
| <i>circNARS2</i> | miR-676-3p                  | 1 |
| <i>circNARS2</i> | miR-6760-3p                 | 2 |
| <i>circNARS2</i> | miR-6761-3p                 | 2 |
| <i>circNARS2</i> | miR-6765-3p                 | 2 |
| <i>circNARS2</i> | miR-6773-3p                 | 1 |
| <i>circNARS2</i> | miR-6782-3p                 | 2 |
| <i>circNARS2</i> | miR-6787-3p                 | 1 |
| <i>circNARS2</i> | miR-6798-3p                 | 1 |
| <i>circNARS2</i> | miR-6804-3p                 | 2 |
| <i>circNARS2</i> | miR-6809-3p                 | 1 |
| <i>circNARS2</i> | miR-6834-3p                 | 1 |



|                  |             |   |
|------------------|-------------|---|
| <i>circNARS2</i> | miR-6834-5p | 2 |
| <i>circNARS2</i> | miR-6837-3p | 1 |
| <i>circNARS2</i> | miR-6847-5p | 1 |
| <i>circNARS2</i> | miR-6851-3p | 2 |
| <i>circNARS2</i> | miR-6856-3p | 1 |
| <i>circNARS2</i> | miR-6857-3p | 2 |
| <i>circNARS2</i> | miR-6866-5p | 1 |
| <i>circNARS2</i> | miR-6868-5p | 1 |
| <i>circNARS2</i> | miR-6871-3p | 1 |
| <i>circNARS2</i> | miR-6873-3p | 1 |
| <i>circNARS2</i> | miR-6888-3p | 1 |
| <i>circNARS2</i> | miR-6890-5p | 1 |
| <i>circNARS2</i> | miR-7108-5p | 2 |
| <i>circNARS2</i> | miR-7109-3p | 2 |
| <i>circNARS2</i> | miR-7114-5p | 2 |
| <i>circNARS2</i> | miR-7150    | 1 |
| <i>circNARS2</i> | miR-7151-5p | 2 |
| <i>circNARS2</i> | miR-7158-3p | 1 |
| <i>circNARS2</i> | miR-7161-3p | 1 |
| <i>circNARS2</i> | miR-759     | 1 |
| <i>circNARS2</i> | miR-7843-3p | 3 |
| <i>circNARS2</i> | miR-7847-3p | 1 |
| <i>circNARS2</i> | miR-7851-3p | 4 |
| <i>circNARS2</i> | miR-7855-5p | 2 |
| <i>circNARS2</i> | miR-7977    | 1 |
| <i>circNARS2</i> | miR-7978    | 2 |
| <i>circNARS2</i> | miR-8060    | 2 |
| <i>circNARS2</i> | miR-8063    | 1 |
| <i>circNARS2</i> | miR-8064    | 1 |
| <i>circNARS2</i> | miR-8069    | 1 |
| <i>circNARS2</i> | miR-877-5p  | 1 |
| <i>circNARS2</i> | miR-885-5p  | 2 |
| <i>circNARS2</i> | miR-888-5p  | 3 |
| <i>circNARS2</i> | miR-891a-3p | 2 |
| <i>circNARS2</i> | miR-892a    | 2 |
| <i>circNARS2</i> | miR-9-3p    | 1 |
| <i>circNARS2</i> | miR-9-5p    | 1 |
| <i>circNARS2</i> | miR-942-5p  | 1 |

|                  |                                       |   |
|------------------|---------------------------------------|---|
| <i>circNARS2</i> | miR-944                               | 2 |
| <i>circNARS2</i> | miR-4524a-3p                          | 1 |
| <i>circNARS2</i> | miR-4524b-3p                          | 1 |
| <i>circNDST3</i> | let-7-5p/98-5p                        | 1 |
| <i>circNDST3</i> | let-7a-2-3p/let-7g-3p                 | 5 |
| <i>circNDST3</i> | let-7a-3p/let-7b-3p/let-7f-1-3p/98-3p | 1 |
| <i>circNDST3</i> | let-7c-3p                             | 5 |
| <i>circNDST3</i> | let-7f-2-3p/1185-3p                   | 1 |
| <i>circNDST3</i> | miR-100-3p                            | 2 |
| <i>circNDST3</i> | miR-101-3p.1                          | 3 |
| <i>circNDST3</i> | miR-101-3p.2                          | 2 |
| <i>circNDST3</i> | miR-103-3p/107                        | 1 |
| <i>circNDST3</i> | miR-1178-3p                           | 2 |
| <i>circNDST3</i> | miR-1183                              | 2 |
| <i>circNDST3</i> | miR-1185-5p                           | 2 |
| <i>circNDST3</i> | miR-1193                              | 2 |
| <i>circNDST3</i> | miR-1197                              | 2 |
| <i>circNDST3</i> | miR-1206                              | 4 |
| <i>circNDST3</i> | miR-1207-3p                           | 1 |
| <i>circNDST3</i> | miR-1208                              | 2 |
| <i>circNDST3</i> | miR-1224-5p                           | 4 |
| <i>circNDST3</i> | miR-1225-5p                           | 1 |
| <i>circNDST3</i> | miR-1226-3p                           | 1 |
| <i>circNDST3</i> | miR-1227-5p                           | 1 |
| <i>circNDST3</i> | miR-1228-3p                           | 2 |
| <i>circNDST3</i> | miR-1229-3p                           | 2 |
| <i>circNDST3</i> | miR-1229-5p                           | 1 |
| <i>circNDST3</i> | miR-1231                              | 2 |
| <i>circNDST3</i> | miR-1236-3p                           | 5 |
| <i>circNDST3</i> | miR-1238-3p                           | 1 |
| <i>circNDST3</i> | miR-124-3p.1                          | 1 |
| <i>circNDST3</i> | miR-124-3p.2/506-3p                   | 1 |
| <i>circNDST3</i> | miR-1243                              | 2 |
| <i>circNDST3</i> | miR-1244                              | 1 |
| <i>circNDST3</i> | miR-125-5p                            | 3 |
| <i>circNDST3</i> | miR-1250-3p                           | 4 |
| <i>circNDST3</i> | miR-1251-5p                           | 1 |
| <i>circNDST3</i> | miR-1252-3p                           | 4 |

|                  |                    |   |
|------------------|--------------------|---|
| <i>circNDST3</i> | miR-1252-5p        | 4 |
| <i>circNDST3</i> | miR-1257           | 1 |
| <i>circNDST3</i> | miR-1260a/1260b    | 2 |
| <i>circNDST3</i> | miR-1264           | 1 |
| <i>circNDST3</i> | miR-1266-3p        | 2 |
| <i>circNDST3</i> | miR-127-5p         | 6 |
| <i>circNDST3</i> | miR-1270           | 2 |
| <i>circNDST3</i> | miR-1272           | 3 |
| <i>circNDST3</i> | miR-1273d          | 1 |
| <i>circNDST3</i> | miR-1273f          | 6 |
| <i>circNDST3</i> | miR-1273g-3p       | 2 |
| <i>circNDST3</i> | miR-1277-5p        | 2 |
| <i>circNDST3</i> | miR-1278           | 3 |
| <i>circNDST3</i> | miR-1279           | 7 |
| <i>circNDST3</i> | miR-128-3p         | 4 |
| <i>circNDST3</i> | miR-1283           | 3 |
| <i>circNDST3</i> | miR-1284           | 4 |
| <i>circNDST3</i> | miR-1287-5p        | 1 |
| <i>circNDST3</i> | miR-1288-3p        | 2 |
| <i>circNDST3</i> | miR-129-5p         | 3 |
| <i>circNDST3</i> | miR-1294           | 2 |
| <i>circNDST3</i> | miR-1295b-3p       | 2 |
| <i>circNDST3</i> | miR-1295b-5p/1912  | 1 |
| <i>circNDST3</i> | miR-1298-5p        | 2 |
| <i>circNDST3</i> | miR-1299           | 1 |
| <i>circNDST3</i> | miR-1301-3p        | 4 |
| <i>circNDST3</i> | miR-1303           | 2 |
| <i>circNDST3</i> | miR-1304-3p        | 2 |
| <i>circNDST3</i> | miR-1304-5p        | 4 |
| <i>circNDST3</i> | miR-1305           | 5 |
| <i>circNDST3</i> | miR-130b-5p        | 3 |
| <i>circNDST3</i> | miR-1322           | 3 |
| <i>circNDST3</i> | miR-1324           | 1 |
| <i>circNDST3</i> | miR-133a-3p.2/133b | 2 |
| <i>circNDST3</i> | miR-134-3p         | 2 |
| <i>circNDST3</i> | miR-1343-3p        | 1 |
| <i>circNDST3</i> | miR-135-5p         | 1 |
| <i>circNDST3</i> | miR-135b-3p        | 2 |

|                  |                                     |   |
|------------------|-------------------------------------|---|
| <i>circNDST3</i> | miR-138-2-3p                        | 1 |
| <i>circNDST3</i> | miR-139-3p                          | 4 |
| <i>circNDST3</i> | miR-140-3p.1                        | 5 |
| <i>circNDST3</i> | miR-141-5p                          | 4 |
| <i>circNDST3</i> | miR-142-5p                          | 2 |
| <i>circNDST3</i> | miR-143-3p                          | 6 |
| <i>circNDST3</i> | miR-144-3p                          | 3 |
| <i>circNDST3</i> | miR-145-3p                          | 3 |
| <i>circNDST3</i> | miR-145-5p                          | 2 |
| <i>circNDST3</i> | miR-1468-3p                         | 1 |
| <i>circNDST3</i> | miR-146a-3p                         | 2 |
| <i>circNDST3</i> | miR-148a-5p                         | 3 |
| <i>circNDST3</i> | miR-149-5p                          | 3 |
| <i>circNDST3</i> | miR-153-3p                          | 2 |
| <i>circNDST3</i> | miR-153-5p                          | 6 |
| <i>circNDST3</i> | miR-154-3p/487-3p                   | 2 |
| <i>circNDST3</i> | miR-155-5p                          | 2 |
| <i>circNDST3</i> | miR-15b-3p                          | 5 |
| <i>circNDST3</i> | miR-16-1-3p                         | 2 |
| <i>circNDST3</i> | miR-16-2-3p/195-3p                  | 2 |
| <i>circNDST3</i> | miR-17-5p/20-5p/93-5p/106-5p/519-3p | 4 |
| <i>circNDST3</i> | miR-182-5p                          | 3 |
| <i>circNDST3</i> | miR-1827                            | 2 |
| <i>circNDST3</i> | miR-183-3p                          | 2 |
| <i>circNDST3</i> | miR-183-5p.1                        | 2 |
| <i>circNDST3</i> | miR-185-3p                          | 1 |
| <i>circNDST3</i> | miR-186-5p                          | 6 |
| <i>circNDST3</i> | miR-188-3p                          | 2 |
| <i>circNDST3</i> | miR-188-5p                          | 1 |
| <i>circNDST3</i> | miR-19-5p                           | 2 |
| <i>circNDST3</i> | miR-190-5p                          | 2 |
| <i>circNDST3</i> | miR-1909-3p/6722-3p                 | 1 |
| <i>circNDST3</i> | miR-190a-3p                         | 2 |
| <i>circNDST3</i> | miR-1911-5p                         | 2 |
| <i>circNDST3</i> | miR-1915-3p/6764-5p                 | 3 |
| <i>circNDST3</i> | miR-192-3p                          | 4 |
| <i>circNDST3</i> | miR-193-3p                          | 2 |
| <i>circNDST3</i> | miR-193a-5p                         | 4 |

|                  |                                     |   |
|------------------|-------------------------------------|---|
| <i>circNDST3</i> | miR-194-5p                          | 1 |
| <i>circNDST3</i> | miR-196-5p                          | 3 |
| <i>circNDST3</i> | miR-197-3p                          | 4 |
| <i>circNDST3</i> | miR-198                             | 2 |
| <i>circNDST3</i> | miR-200-3p/429                      | 2 |
| <i>circNDST3</i> | miR-202-3p                          | 2 |
| <i>circNDST3</i> | miR-203a-3p.1                       | 4 |
| <i>circNDST3</i> | miR-203b-3p                         | 3 |
| <i>circNDST3</i> | miR-204-3p/4646-5p                  | 3 |
| <i>circNDST3</i> | miR-204-5p/211-5p                   | 2 |
| <i>circNDST3</i> | miR-205-3p                          | 5 |
| <i>circNDST3</i> | miR-205-5p                          | 1 |
| <i>circNDST3</i> | miR-2052                            | 2 |
| <i>circNDST3</i> | miR-2054                            | 2 |
| <i>circNDST3</i> | miR-208-3p                          | 1 |
| <i>circNDST3</i> | miR-208-5p                          | 1 |
| <i>circNDST3</i> | miR-20a-3p                          | 2 |
| <i>circNDST3</i> | miR-2113                            | 6 |
| <i>circNDST3</i> | miR-2114-3p                         | 1 |
| <i>circNDST3</i> | miR-2116-5p                         | 2 |
| <i>circNDST3</i> | miR-214-3p/3619-5p                  | 1 |
| <i>circNDST3</i> | miR-215-3p                          | 2 |
| <i>circNDST3</i> | miR-216a-5p                         | 2 |
| <i>circNDST3</i> | miR-216b-5p                         | 2 |
| <i>circNDST3</i> | miR-217                             | 3 |
| <i>circNDST3</i> | miR-219b-5p                         | 2 |
| <i>circNDST3</i> | miR-22-5p                           | 2 |
| <i>circNDST3</i> | miR-221-3p/222-3p                   | 1 |
| <i>circNDST3</i> | miR-223-3p                          | 2 |
| <i>circNDST3</i> | miR-223-5p                          | 2 |
| <i>circNDST3</i> | miR-2276-3p                         | 2 |
| <i>circNDST3</i> | miR-2276-5p                         | 2 |
| <i>circNDST3</i> | miR-2355-5p                         | 2 |
| <i>circNDST3</i> | miR-25-3p/32-5p/92-3p/363-3p/367-3p | 2 |
| <i>circNDST3</i> | miR-26-5p                           | 3 |
| <i>circNDST3</i> | miR-2681-3p                         | 2 |
| <i>circNDST3</i> | miR-2681-5p                         | 3 |
| <i>circNDST3</i> | miR-2682-3p/6781-3p                 | 2 |

|                  |                                              |   |
|------------------|----------------------------------------------|---|
| <i>circNDST3</i> | miR-26b-3p                                   | 2 |
| <i>circNDST3</i> | miR-27-3p                                    | 1 |
| <i>circNDST3</i> | miR-27b-5p                                   | 2 |
| <i>circNDST3</i> | miR-2861                                     | 1 |
| <i>circNDST3</i> | miR-29-3p                                    | 4 |
| <i>circNDST3</i> | miR-2909                                     | 1 |
| <i>circNDST3</i> | miR-297                                      | 1 |
| <i>circNDST3</i> | miR-298                                      | 4 |
| <i>circNDST3</i> | miR-29a-5p                                   | 4 |
| <i>circNDST3</i> | miR-29b-1-5p                                 | 3 |
| <i>circNDST3</i> | miR-30-3p                                    | 3 |
| <i>circNDST3</i> | miR-30-5p                                    | 1 |
| <i>circNDST3</i> | miR-302b-5p/302d-5p                          | 3 |
| <i>circNDST3</i> | miR-3064-3p                                  | 2 |
| <i>circNDST3</i> | miR-3065-5p                                  | 2 |
| <i>circNDST3</i> | miR-3074-3p                                  | 2 |
| <i>circNDST3</i> | miR-3074-5p                                  | 3 |
| <i>circNDST3</i> | miR-30b-3p/1273h-5p/3689-3p/6779-5p/6780a-5p | 3 |
| <i>circNDST3</i> | miR-30c-3p/6788-5p                           | 2 |
| <i>circNDST3</i> | miR-31-5p                                    | 2 |
| <i>circNDST3</i> | miR-3117-3p                                  | 3 |
| <i>circNDST3</i> | miR-3121-3p                                  | 1 |
| <i>circNDST3</i> | miR-3121-5p                                  | 2 |
| <i>circNDST3</i> | miR-3123                                     | 1 |
| <i>circNDST3</i> | miR-3124-3p                                  | 5 |
| <i>circNDST3</i> | miR-3130-5p/4482-5p                          | 1 |
| <i>circNDST3</i> | miR-3133                                     | 6 |
| <i>circNDST3</i> | miR-3134                                     | 2 |
| <i>circNDST3</i> | miR-3135b                                    | 1 |
| <i>circNDST3</i> | miR-3136-5p/4439                             | 2 |
| <i>circNDST3</i> | miR-3140-3p                                  | 1 |
| <i>circNDST3</i> | miR-3140-5p                                  | 1 |
| <i>circNDST3</i> | miR-3148                                     | 2 |
| <i>circNDST3</i> | miR-3149                                     | 3 |
| <i>circNDST3</i> | miR-3151-5p                                  | 3 |
| <i>circNDST3</i> | miR-3152-5p                                  | 2 |
| <i>circNDST3</i> | miR-3153/6733-5p/6739-5p                     | 2 |
| <i>circNDST3</i> | miR-3154                                     | 4 |

|                  |                     |    |
|------------------|---------------------|----|
| <i>circNDST3</i> | miR-3156-3p         | 2  |
| <i>circNDST3</i> | miR-3157-5p         | 2  |
| <i>circNDST3</i> | miR-3159            | 2  |
| <i>circNDST3</i> | miR-3160-5p         | 4  |
| <i>circNDST3</i> | miR-3161            | 7  |
| <i>circNDST3</i> | miR-3163            | 7  |
| <i>circNDST3</i> | miR-3169            | 4  |
| <i>circNDST3</i> | miR-3170/6855-5p    | 4  |
| <i>circNDST3</i> | miR-3173-3p/6891-5p | 4  |
| <i>circNDST3</i> | miR-3180-5p         | 10 |
| <i>circNDST3</i> | miR-3182            | 2  |
| <i>circNDST3</i> | miR-3184-3p         | 1  |
| <i>circNDST3</i> | miR-3189-5p         | 2  |
| <i>circNDST3</i> | miR-3190-3p         | 4  |
| <i>circNDST3</i> | miR-3191-5p         | 2  |
| <i>circNDST3</i> | miR-3192-5p         | 3  |
| <i>circNDST3</i> | miR-3193            | 1  |
| <i>circNDST3</i> | miR-3194-3p         | 2  |
| <i>circNDST3</i> | miR-32-3p           | 3  |
| <i>circNDST3</i> | miR-320             | 5  |
| <i>circNDST3</i> | miR-3200-5p         | 3  |
| <i>circNDST3</i> | miR-3202            | 2  |
| <i>circNDST3</i> | miR-330-3p.2        | 2  |
| <i>circNDST3</i> | miR-335-3p          | 3  |
| <i>circNDST3</i> | miR-335-5p          | 4  |
| <i>circNDST3</i> | miR-338-5p          | 1  |
| <i>circNDST3</i> | miR-340-3p/6827-3p  | 2  |
| <i>circNDST3</i> | miR-342-3p          | 1  |
| <i>circNDST3</i> | miR-345-3p          | 1  |
| <i>circNDST3</i> | miR-34a-3p          | 1  |
| <i>circNDST3</i> | miR-34b-3p          | 2  |
| <i>circNDST3</i> | miR-34c-3p          | 2  |
| <i>circNDST3</i> | miR-3529-3p         | 2  |
| <i>circNDST3</i> | miR-3605-5p         | 2  |
| <i>circNDST3</i> | miR-3607-3p         | 2  |
| <i>circNDST3</i> | miR-3607-5p         | 1  |
| <i>circNDST3</i> | miR-3611            | 3  |
| <i>circNDST3</i> | miR-3613-3p         | 6  |

|                  |                                   |   |
|------------------|-----------------------------------|---|
| <i>circNDST3</i> | miR-3613-5p                       | 5 |
| <i>circNDST3</i> | miR-3614-3p                       | 1 |
| <i>circNDST3</i> | miR-3614-5p                       | 2 |
| <i>circNDST3</i> | miR-3617-3p                       | 1 |
| <i>circNDST3</i> | miR-3620-3p                       | 2 |
| <i>circNDST3</i> | miR-3622b-5p                      | 1 |
| <i>circNDST3</i> | miR-3646                          | 4 |
| <i>circNDST3</i> | miR-3653-3p                       | 3 |
| <i>circNDST3</i> | miR-3654                          | 2 |
| <i>circNDST3</i> | miR-3658                          | 1 |
| <i>circNDST3</i> | miR-3662                          | 2 |
| <i>circNDST3</i> | miR-3668                          | 1 |
| <i>circNDST3</i> | miR-3671                          | 1 |
| <i>circNDST3</i> | miR-3674                          | 6 |
| <i>circNDST3</i> | miR-3675-3p                       | 2 |
| <i>circNDST3</i> | miR-3677-5p                       | 4 |
| <i>circNDST3</i> | miR-3679-3p                       | 2 |
| <i>circNDST3</i> | miR-3680-5p                       | 1 |
| <i>circNDST3</i> | miR-3686                          | 3 |
| <i>circNDST3</i> | miR-3688-3p                       | 4 |
| <i>circNDST3</i> | miR-3688-5p                       | 4 |
| <i>circNDST3</i> | miR-3689a-5p/3689b-5p/3689e/3689f | 2 |
| <i>circNDST3</i> | miR-3689d/6851-5p                 | 2 |
| <i>circNDST3</i> | miR-369-3p                        | 3 |
| <i>circNDST3</i> | miR-3692-5p                       | 1 |
| <i>circNDST3</i> | miR-370-3p                        | 1 |
| <i>circNDST3</i> | miR-3713                          | 1 |
| <i>circNDST3</i> | miR-3714                          | 1 |
| <i>circNDST3</i> | miR-374-5p                        | 2 |
| <i>circNDST3</i> | miR-374-5p/655-3p                 | 3 |
| <i>circNDST3</i> | miR-374a-3p                       | 1 |
| <i>circNDST3</i> | miR-375                           | 1 |
| <i>circNDST3</i> | miR-376a-2-5p                     | 1 |
| <i>circNDST3</i> | miR-376a-5p                       | 1 |
| <i>circNDST3</i> | miR-377-3p                        | 2 |
| <i>circNDST3</i> | miR-379-5p                        | 2 |
| <i>circNDST3</i> | miR-380-3p                        | 1 |
| <i>circNDST3</i> | miR-380-5p/563                    | 4 |



|                  |                     |   |
|------------------|---------------------|---|
| <i>circNDST3</i> | miR-381-3p          | 5 |
| <i>circNDST3</i> | miR-382-3p          | 3 |
| <i>circNDST3</i> | miR-382-5p          | 2 |
| <i>circNDST3</i> | miR-383-5p.1        | 2 |
| <i>circNDST3</i> | miR-3907            | 2 |
| <i>circNDST3</i> | miR-3910            | 1 |
| <i>circNDST3</i> | miR-3912-5p         | 4 |
| <i>circNDST3</i> | miR-3915            | 4 |
| <i>circNDST3</i> | miR-3918            | 1 |
| <i>circNDST3</i> | miR-3919            | 2 |
| <i>circNDST3</i> | miR-3920            | 1 |
| <i>circNDST3</i> | miR-3923            | 2 |
| <i>circNDST3</i> | miR-3924            | 1 |
| <i>circNDST3</i> | miR-3925-5p         | 1 |
| <i>circNDST3</i> | miR-3927-3p/6831-5p | 3 |
| <i>circNDST3</i> | miR-3928-3p         | 1 |
| <i>circNDST3</i> | miR-3928-5p/6806-3p | 2 |
| <i>circNDST3</i> | miR-3929/4419b/4478 | 2 |
| <i>circNDST3</i> | miR-3935            | 1 |
| <i>circNDST3</i> | miR-3941            | 3 |
| <i>circNDST3</i> | miR-3942-3p         | 3 |
| <i>circNDST3</i> | miR-3943            | 2 |
| <i>circNDST3</i> | miR-3944-5p         | 2 |
| <i>circNDST3</i> | miR-3976            | 1 |
| <i>circNDST3</i> | miR-3978            | 4 |
| <i>circNDST3</i> | miR-409-3p          | 2 |
| <i>circNDST3</i> | miR-411-5p.2        | 1 |
| <i>circNDST3</i> | miR-425-5p          | 2 |
| <i>circNDST3</i> | miR-4251            | 1 |
| <i>circNDST3</i> | miR-4252            | 2 |
| <i>circNDST3</i> | miR-4255            | 1 |
| <i>circNDST3</i> | miR-4261            | 3 |
| <i>circNDST3</i> | miR-4265/4296/4322  | 2 |
| <i>circNDST3</i> | miR-4267            | 3 |
| <i>circNDST3</i> | miR-4273/7156-5p    | 2 |
| <i>circNDST3</i> | miR-4274            | 1 |
| <i>circNDST3</i> | miR-4277            | 3 |
| <i>circNDST3</i> | miR-4279            | 2 |

|                  |                                              |   |
|------------------|----------------------------------------------|---|
| <i>circNDST3</i> | miR-4282                                     | 3 |
| <i>circNDST3</i> | miR-4283                                     | 1 |
| <i>circNDST3</i> | miR-4287/4685-3p                             | 2 |
| <i>circNDST3</i> | miR-4289                                     | 1 |
| <i>circNDST3</i> | miR-4303                                     | 2 |
| <i>circNDST3</i> | miR-4307                                     | 2 |
| <i>circNDST3</i> | miR-431-3p                                   | 2 |
| <i>circNDST3</i> | miR-431-5p                                   | 3 |
| <i>circNDST3</i> | miR-4314                                     | 2 |
| <i>circNDST3</i> | miR-4316                                     | 2 |
| <i>circNDST3</i> | miR-4317                                     | 4 |
| <i>circNDST3</i> | miR-4318                                     | 2 |
| <i>circNDST3</i> | miR-432-5p                                   | 3 |
| <i>circNDST3</i> | miR-4323                                     | 2 |
| <i>circNDST3</i> | miR-4325                                     | 1 |
| <i>circNDST3</i> | miR-4326                                     | 1 |
| <i>circNDST3</i> | miR-4328                                     | 2 |
| <i>circNDST3</i> | miR-4329                                     | 1 |
| <i>circNDST3</i> | miR-433-3p                                   | 4 |
| <i>circNDST3</i> | miR-4330                                     | 2 |
| <i>circNDST3</i> | miR-4421/5699-3p                             | 2 |
| <i>circNDST3</i> | miR-4422                                     | 2 |
| <i>circNDST3</i> | miR-4423-5p                                  | 2 |
| <i>circNDST3</i> | miR-4426/4647/4662b                          | 6 |
| <i>circNDST3</i> | miR-4427                                     | 2 |
| <i>circNDST3</i> | miR-4428                                     | 4 |
| <i>circNDST3</i> | miR-4434/4516/5703                           | 5 |
| <i>circNDST3</i> | miR-4436b-3p/4632-5p/6735-5p/6879-5p/7843-5p |   |
| <i>circNDST3</i> | miR-4443                                     | 2 |
| <i>circNDST3</i> | miR-4446-5p                                  | 6 |
| <i>circNDST3</i> | miR-4447/4472                                | 3 |
| <i>circNDST3</i> | miR-4451                                     | 2 |
| <i>circNDST3</i> | miR-4452                                     | 2 |
| <i>circNDST3</i> | miR-4453/4538                                | 4 |
| <i>circNDST3</i> | miR-4457                                     | 2 |
| <i>circNDST3</i> | miR-4460                                     | 2 |
| <i>circNDST3</i> | miR-4464/4748                                | 3 |
| <i>circNDST3</i> | miR-4469                                     | 2 |

|                  |                          |   |
|------------------|--------------------------|---|
| <i>circNDST3</i> | miR-4470                 | 3 |
| <i>circNDST3</i> | miR-4475                 | 2 |
| <i>circNDST3</i> | miR-4477b                | 1 |
| <i>circNDST3</i> | miR-448                  | 2 |
| <i>circNDST3</i> | miR-4489                 | 1 |
| <i>circNDST3</i> | miR-4493                 | 2 |
| <i>circNDST3</i> | miR-4494                 | 1 |
| <i>circNDST3</i> | miR-4495                 | 3 |
| <i>circNDST3</i> | miR-4496                 | 1 |
| <i>circNDST3</i> | miR-4501                 | 4 |
| <i>circNDST3</i> | miR-450b-3p/769-3p       | 1 |
| <i>circNDST3</i> | miR-4511                 | 4 |
| <i>circNDST3</i> | miR-4512                 | 1 |
| <i>circNDST3</i> | miR-4515                 | 2 |
| <i>circNDST3</i> | miR-4517                 | 2 |
| <i>circNDST3</i> | miR-4519                 | 1 |
| <i>circNDST3</i> | miR-452-3p               | 3 |
| <i>circNDST3</i> | miR-452-5p/892-3p        | 2 |
| <i>circNDST3</i> | miR-4524b-3p             | 1 |
| <i>circNDST3</i> | miR-4527/6503-5p         | 2 |
| <i>circNDST3</i> | miR-4531                 | 2 |
| <i>circNDST3</i> | miR-4533                 | 2 |
| <i>circNDST3</i> | miR-4534/8082            | 2 |
| <i>circNDST3</i> | miR-4539                 | 3 |
| <i>circNDST3</i> | miR-4633-5p              | 2 |
| <i>circNDST3</i> | miR-4635                 | 1 |
| <i>circNDST3</i> | miR-4639-3p              | 2 |
| <i>circNDST3</i> | miR-4642                 | 5 |
| <i>circNDST3</i> | miR-4645-3p              | 2 |
| <i>circNDST3</i> | miR-4650-3p              | 2 |
| <i>circNDST3</i> | miR-4652-3p              | 1 |
| <i>circNDST3</i> | miR-4656                 | 1 |
| <i>circNDST3</i> | miR-4660                 | 2 |
| <i>circNDST3</i> | miR-4661-3p              | 1 |
| <i>circNDST3</i> | miR-4662-5p              | 2 |
| <i>circNDST3</i> | miR-4666a-3p             | 5 |
| <i>circNDST3</i> | miR-4666a-5p             | 1 |
| <i>circNDST3</i> | miR-4667-5p/4700-5p/8089 | 2 |

|                  |                     |   |
|------------------|---------------------|---|
| <i>circNDST3</i> | miR-4668-3p         | 2 |
| <i>circNDST3</i> | miR-4668-5p         | 2 |
| <i>circNDST3</i> | miR-4672            | 3 |
| <i>circNDST3</i> | miR-4675/4741       | 1 |
| <i>circNDST3</i> | miR-4677-3p         | 2 |
| <i>circNDST3</i> | miR-4677-5p         | 2 |
| <i>circNDST3</i> | miR-4679            | 2 |
| <i>circNDST3</i> | miR-4680-3p         | 2 |
| <i>circNDST3</i> | miR-4680-5p         | 1 |
| <i>circNDST3</i> | miR-4682            | 1 |
| <i>circNDST3</i> | miR-4683            | 4 |
| <i>circNDST3</i> | miR-4684-5p         | 2 |
| <i>circNDST3</i> | miR-4685-5p/6837-5p | 2 |
| <i>circNDST3</i> | miR-4686            | 1 |
| <i>circNDST3</i> | miR-4688/6743-5p    | 3 |
| <i>circNDST3</i> | miR-4689/6858-5p    | 4 |
| <i>circNDST3</i> | miR-4690-5p         | 1 |
| <i>circNDST3</i> | miR-4691-3p         | 2 |
| <i>circNDST3</i> | miR-4693-3p         | 2 |
| <i>circNDST3</i> | miR-4694-5p         | 6 |
| <i>circNDST3</i> | miR-4695-3p         | 2 |
| <i>circNDST3</i> | miR-4696            | 2 |
| <i>circNDST3</i> | miR-4697-3p         | 2 |
| <i>circNDST3</i> | miR-4699-5p         | 5 |
| <i>circNDST3</i> | miR-4703-3p         | 5 |
| <i>circNDST3</i> | miR-4704-3p         | 6 |
| <i>circNDST3</i> | miR-4705            | 2 |
| <i>circNDST3</i> | miR-4708-5p         | 6 |
| <i>circNDST3</i> | miR-4709-3p         | 3 |
| <i>circNDST3</i> | miR-4709-5p         | 3 |
| <i>circNDST3</i> | miR-4710            | 2 |
| <i>circNDST3</i> | miR-4711-3p         | 2 |
| <i>circNDST3</i> | miR-4711-5p         | 2 |
| <i>circNDST3</i> | miR-4712-3p         | 3 |
| <i>circNDST3</i> | miR-4713-5p         | 2 |
| <i>circNDST3</i> | miR-4715-3p         | 1 |
| <i>circNDST3</i> | miR-4716-5p         | 2 |
| <i>circNDST3</i> | miR-4717-3p         | 1 |

|                  |                     |   |
|------------------|---------------------|---|
| <i>circNDST3</i> | miR-4719            | 2 |
| <i>circNDST3</i> | miR-4722-3p/6727-3p | 1 |
| <i>circNDST3</i> | miR-4724-3p         | 1 |
| <i>circNDST3</i> | miR-4724-5p         | 3 |
| <i>circNDST3</i> | miR-4726-3p         | 3 |
| <i>circNDST3</i> | miR-4727-3p         | 2 |
| <i>circNDST3</i> | miR-4731-3p/4801    | 2 |
| <i>circNDST3</i> | miR-4732-3p         | 3 |
| <i>circNDST3</i> | miR-4733-3p         | 1 |
| <i>circNDST3</i> | miR-4733-5p         | 2 |
| <i>circNDST3</i> | miR-4738-3p         | 1 |
| <i>circNDST3</i> | miR-4740-5p         | 2 |
| <i>circNDST3</i> | miR-4742-3p         | 1 |
| <i>circNDST3</i> | miR-4743-3p         | 1 |
| <i>circNDST3</i> | miR-4752            | 6 |
| <i>circNDST3</i> | miR-4755-5p/5006-3p | 5 |
| <i>circNDST3</i> | miR-4756-3p         | 2 |
| <i>circNDST3</i> | miR-4758-3p         | 2 |
| <i>circNDST3</i> | miR-4759            | 4 |
| <i>circNDST3</i> | miR-4760-3p         | 1 |
| <i>circNDST3</i> | miR-4761-3p         | 1 |
| <i>circNDST3</i> | miR-4762-3p         | 3 |
| <i>circNDST3</i> | miR-4766-5p         | 6 |
| <i>circNDST3</i> | miR-4769-3p/6817-5p | 1 |
| <i>circNDST3</i> | miR-4772-3p         | 2 |
| <i>circNDST3</i> | miR-4772-5p         | 2 |
| <i>circNDST3</i> | miR-4774-3p         | 2 |
| <i>circNDST3</i> | miR-4775            | 2 |
| <i>circNDST3</i> | miR-4776-3p         | 2 |
| <i>circNDST3</i> | miR-4777-5p         | 4 |
| <i>circNDST3</i> | miR-4778-3p         | 2 |
| <i>circNDST3</i> | miR-4778-5p         | 1 |
| <i>circNDST3</i> | miR-4781-3p         | 2 |
| <i>circNDST3</i> | miR-4782-5p/5706    | 1 |
| <i>circNDST3</i> | miR-4786-3p         | 4 |
| <i>circNDST3</i> | miR-4789-5p         | 1 |
| <i>circNDST3</i> | miR-4792            | 2 |
| <i>circNDST3</i> | miR-4795-3p         | 1 |

|                  |                          |   |
|------------------|--------------------------|---|
| <i>circNDST3</i> | miR-4795-5p              | 1 |
| <i>circNDST3</i> | miR-4796-3p              | 4 |
| <i>circNDST3</i> | miR-4796-5p              | 2 |
| <i>circNDST3</i> | miR-4798-3p              | 1 |
| <i>circNDST3</i> | miR-4802-5p              | 2 |
| <i>circNDST3</i> | miR-486-3p               | 2 |
| <i>circNDST3</i> | miR-486-5p               | 1 |
| <i>circNDST3</i> | miR-488-3p               | 4 |
| <i>circNDST3</i> | miR-491-5p               | 3 |
| <i>circNDST3</i> | miR-493-5p               | 5 |
| <i>circNDST3</i> | miR-495-5p               | 2 |
| <i>circNDST3</i> | miR-496.1                | 1 |
| <i>circNDST3</i> | miR-498                  | 4 |
| <i>circNDST3</i> | miR-499a-3p/499b-3p      | 2 |
| <i>circNDST3</i> | miR-499a-5p              | 1 |
| <i>circNDST3</i> | miR-499b-5p              | 1 |
| <i>circNDST3</i> | miR-5000-3p              | 2 |
| <i>circNDST3</i> | miR-5000-5p              | 4 |
| <i>circNDST3</i> | miR-5002-5p              | 3 |
| <i>circNDST3</i> | miR-5003-3p              | 2 |
| <i>circNDST3</i> | miR-5007-3p              | 3 |
| <i>circNDST3</i> | miR-500a-5p              | 2 |
| <i>circNDST3</i> | miR-500b-3p              | 2 |
| <i>circNDST3</i> | miR-501-3p/502-3p        | 1 |
| <i>circNDST3</i> | miR-5010-3p              | 6 |
| <i>circNDST3</i> | miR-5011-5p              | 5 |
| <i>circNDST3</i> | miR-502-5p               | 3 |
| <i>circNDST3</i> | miR-504-3p               | 3 |
| <i>circNDST3</i> | miR-505-3p.1             | 2 |
| <i>circNDST3</i> | miR-506-5p               | 1 |
| <i>circNDST3</i> | miR-5089-3p              | 1 |
| <i>circNDST3</i> | miR-5089-5p              | 1 |
| <i>circNDST3</i> | miR-509-3-5p/509-5p/4418 | 3 |
| <i>circNDST3</i> | miR-509-3p               | 1 |
| <i>circNDST3</i> | miR-5092                 | 3 |
| <i>circNDST3</i> | miR-5093                 | 1 |
| <i>circNDST3</i> | miR-5095/7151-3p         | 3 |
| <i>circNDST3</i> | miR-5096                 | 2 |

|                  |                                                                    |   |
|------------------|--------------------------------------------------------------------|---|
| <i>circNDST3</i> | miR-510-3p                                                         | 4 |
| <i>circNDST3</i> | miR-5100                                                           | 2 |
| <i>circNDST3</i> | miR-511-3p                                                         | 1 |
| <i>circNDST3</i> | miR-511-5p                                                         | 3 |
| <i>circNDST3</i> | miR-513a-3p/513c-3p/3606-3p                                        | 6 |
| <i>circNDST3</i> | miR-513a-5p                                                        | 1 |
| <i>circNDST3</i> | miR-513b-3p                                                        | 2 |
| <i>circNDST3</i> | miR-516b-5p                                                        | 1 |
| <i>circNDST3</i> | miR-517-5p                                                         | 1 |
| <i>circNDST3</i> | miR-5186                                                           | 1 |
| <i>circNDST3</i> | miR-5187-3p                                                        | 2 |
| <i>circNDST3</i> | miR-5189-3p                                                        | 2 |
| <i>circNDST3</i> | miR-518d-5p/519-5p                                                 | 4 |
| <i>circNDST3</i> | miR-5191                                                           | 1 |
| <i>circNDST3</i> | miR-524-5p                                                         | 5 |
| <i>circNDST3</i> | miR-526b-5p                                                        | 4 |
| <i>circNDST3</i> | miR-539-5p                                                         | 4 |
| <i>circNDST3</i> | miR-545-5p                                                         | 2 |
| <i>circNDST3</i> | miR-548ac/548bb-3p/548d-3p/548h-3p/548z                            | 4 |
| <i>circNDST3</i> | miR-548ah-5p/3609                                                  | 4 |
| <i>circNDST3</i> | miR-548aj-5p/548f-5p/548g-5p/548x-5p                               | 1 |
| <i>circNDST3</i> | miR-548ap-3p/548aa/548t-3p                                         | 2 |
| <i>circNDST3</i> | miR-548aq-3p/548am-3p/548aj-3p/548ah-3p/548ae-3p/548j-3p/548x-3p   | 2 |
| <i>circNDST3</i> | miR-548as-3p                                                       | 2 |
| <i>circNDST3</i> | miR-548at-5p                                                       | 5 |
| <i>circNDST3</i> | miR-548av-3p                                                       | 3 |
| <i>circNDST3</i> | miR-548av-5p/548k/8054                                             | 2 |
| <i>circNDST3</i> | miR-548ay-3p/548at-3p                                              | 2 |
| <i>circNDST3</i> | miR-548ay-5p/548au-5p/548as-5p/548ar-3p/548aq-5p/548ap-5p/548am-5p | 2 |
| <i>circNDST3</i> | miR-548az-3p/548ar-3p/548a-3p/548e-3p/548f-3p                      | 4 |
| <i>circNDST3</i> | miR-548az-5p/548t-5p                                               | 8 |
| <i>circNDST3</i> | miR-548b-3p                                                        | 4 |
| <i>circNDST3</i> | miR-548c-3p                                                        | 1 |
| <i>circNDST3</i> | miR-548e-5p                                                        | 5 |
| <i>circNDST3</i> | miR-548g-3p                                                        | 6 |
| <i>circNDST3</i> | miR-548l                                                           | 2 |
| <i>circNDST3</i> | miR-548m                                                           | 2 |
| <i>circNDST3</i> | miR-548n                                                           | 8 |

|                  |             |   |
|------------------|-------------|---|
| <i>circNDST3</i> | miR-548v    | 1 |
| <i>circNDST3</i> | miR-551b-5p | 1 |
| <i>circNDST3</i> | miR-552-3p  | 3 |
| <i>circNDST3</i> | miR-552-5p  | 2 |
| <i>circNDST3</i> | miR-555     | 1 |
| <i>circNDST3</i> | miR-556-3p  | 2 |
| <i>circNDST3</i> | miR-556-5p  | 3 |
| <i>circNDST3</i> | miR-5571-3p | 1 |
| <i>circNDST3</i> | miR-5571-5p | 1 |
| <i>circNDST3</i> | miR-5579-3p | 1 |
| <i>circNDST3</i> | miR-5579-5p | 3 |
| <i>circNDST3</i> | miR-5582-3p | 4 |
| <i>circNDST3</i> | miR-5583-3p | 2 |
| <i>circNDST3</i> | miR-5584-5p | 2 |
| <i>circNDST3</i> | miR-5585-3p | 1 |
| <i>circNDST3</i> | miR-5587-5p | 2 |
| <i>circNDST3</i> | miR-561-3p  | 5 |
| <i>circNDST3</i> | miR-568     | 2 |
| <i>circNDST3</i> | miR-5680    | 4 |
| <i>circNDST3</i> | miR-5681a   | 2 |
| <i>circNDST3</i> | miR-5684    | 1 |
| <i>circNDST3</i> | miR-5690    | 2 |
| <i>circNDST3</i> | miR-5692a   | 3 |
| <i>circNDST3</i> | miR-5692bc  | 3 |
| <i>circNDST3</i> | miR-5696    | 6 |
| <i>circNDST3</i> | miR-5699-5p | 2 |
| <i>circNDST3</i> | miR-570-3p  | 1 |
| <i>circNDST3</i> | miR-5700    | 1 |
| <i>circNDST3</i> | miR-5708    | 1 |
| <i>circNDST3</i> | miR-578     | 4 |
| <i>circNDST3</i> | miR-579-3p  | 6 |
| <i>circNDST3</i> | miR-580-3p  | 4 |
| <i>circNDST3</i> | miR-580-5p  | 6 |
| <i>circNDST3</i> | miR-581     | 2 |
| <i>circNDST3</i> | miR-582-3p  | 2 |
| <i>circNDST3</i> | miR-582-5p  | 2 |
| <i>circNDST3</i> | miR-584-3p  | 4 |
| <i>circNDST3</i> | miR-584-5p  | 3 |



|                  |                    |   |
|------------------|--------------------|---|
| <i>circNDST3</i> | miR-587            | 6 |
| <i>circNDST3</i> | miR-589-3p         | 1 |
| <i>circNDST3</i> | miR-590-3p         | 3 |
| <i>circNDST3</i> | miR-595            | 3 |
| <i>circNDST3</i> | miR-597-5p         | 1 |
| <i>circNDST3</i> | miR-604            | 1 |
| <i>circNDST3</i> | miR-605-3p         | 2 |
| <i>circNDST3</i> | miR-605-5p         | 3 |
| <i>circNDST3</i> | miR-607            | 1 |
| <i>circNDST3</i> | miR-6071           | 1 |
| <i>circNDST3</i> | miR-6072/6891-3p   | 2 |
| <i>circNDST3</i> | miR-6074           | 7 |
| <i>circNDST3</i> | miR-6076/6797-3p   | 1 |
| <i>circNDST3</i> | miR-6077           | 4 |
| <i>circNDST3</i> | miR-6079           | 6 |
| <i>circNDST3</i> | miR-6083           | 2 |
| <i>circNDST3</i> | miR-6085/6813-5p   | 3 |
| <i>circNDST3</i> | miR-610            | 1 |
| <i>circNDST3</i> | miR-6124           | 2 |
| <i>circNDST3</i> | miR-6128           | 4 |
| <i>circNDST3</i> | miR-6132/6836-5p   | 1 |
| <i>circNDST3</i> | miR-6134           | 1 |
| <i>circNDST3</i> | miR-615-5p         | 4 |
| <i>circNDST3</i> | miR-616-3p         | 1 |
| <i>circNDST3</i> | miR-6165           | 1 |
| <i>circNDST3</i> | miR-617            | 2 |
| <i>circNDST3</i> | miR-619-5p/6506-5p | 3 |
| <i>circNDST3</i> | miR-623            | 2 |
| <i>circNDST3</i> | miR-627-3p         | 4 |
| <i>circNDST3</i> | miR-632/4288       | 2 |
| <i>circNDST3</i> | miR-633            | 4 |
| <i>circNDST3</i> | miR-636            | 2 |
| <i>circNDST3</i> | miR-637            | 2 |
| <i>circNDST3</i> | miR-639            | 1 |
| <i>circNDST3</i> | miR-641/3617-5p    | 1 |
| <i>circNDST3</i> | miR-642a-5p        | 2 |
| <i>circNDST3</i> | miR-642b-5p        | 2 |
| <i>circNDST3</i> | miR-6500-3p        | 2 |

|                  |                             |   |
|------------------|-----------------------------|---|
| <i>circNDST3</i> | miR-6501-5p                 | 2 |
| <i>circNDST3</i> | miR-6505-3p                 | 2 |
| <i>circNDST3</i> | miR-6505-5p                 | 5 |
| <i>circNDST3</i> | miR-6507-5p                 | 2 |
| <i>circNDST3</i> | miR-6508-5p/8067            | 4 |
| <i>circNDST3</i> | miR-6510-5p                 | 1 |
| <i>circNDST3</i> | miR-6511-3p                 | 2 |
| <i>circNDST3</i> | miR-6512-5p                 | 3 |
| <i>circNDST3</i> | miR-6514-5p                 | 2 |
| <i>circNDST3</i> | miR-6515-3p                 | 5 |
| <i>circNDST3</i> | miR-6515-5p                 | 2 |
| <i>circNDST3</i> | miR-6516-3p                 | 5 |
| <i>circNDST3</i> | miR-6516-5p                 | 2 |
| <i>circNDST3</i> | miR-653-5p                  | 1 |
| <i>circNDST3</i> | miR-654-3p                  | 2 |
| <i>circNDST3</i> | miR-654-5p                  | 1 |
| <i>circNDST3</i> | miR-656-3p                  | 2 |
| <i>circNDST3</i> | miR-664a-5p/4794            | 3 |
| <i>circNDST3</i> | miR-665                     | 1 |
| <i>circNDST3</i> | miR-670-3p                  | 1 |
| <i>circNDST3</i> | miR-670-5p                  | 4 |
| <i>circNDST3</i> | miR-6720-5p                 | 3 |
| <i>circNDST3</i> | miR-6721-5p                 | 1 |
| <i>circNDST3</i> | miR-6728-5p                 | 1 |
| <i>circNDST3</i> | miR-6730-5p                 | 2 |
| <i>circNDST3</i> | miR-6731-5p/8085            | 3 |
| <i>circNDST3</i> | miR-6732-3p                 | 2 |
| <i>circNDST3</i> | miR-6736-3p                 | 3 |
| <i>circNDST3</i> | miR-6737-5p/6812-5p/6819-5p | 4 |
| <i>circNDST3</i> | miR-6739-3p                 | 2 |
| <i>circNDST3</i> | miR-6742-3p                 | 1 |
| <i>circNDST3</i> | miR-6742-5p                 | 3 |
| <i>circNDST3</i> | miR-6747-3p                 | 1 |
| <i>circNDST3</i> | miR-6748-3p                 | 2 |
| <i>circNDST3</i> | miR-675-3p                  | 1 |
| <i>circNDST3</i> | miR-6750-3p                 | 4 |
| <i>circNDST3</i> | miR-6750-5p/6822-5p         | 2 |
| <i>circNDST3</i> | miR-6752-3p                 | 1 |

|                  |                       |   |
|------------------|-----------------------|---|
| <i>circNDST3</i> | miR-6753-3p/7107-3p   | 2 |
| <i>circNDST3</i> | miR-6758-3p           | 3 |
| <i>circNDST3</i> | miR-6758-5p/6856-5p   | 2 |
| <i>circNDST3</i> | miR-6759-5p           | 2 |
| <i>circNDST3</i> | miR-676-3p            | 3 |
| <i>circNDST3</i> | miR-676-5p            | 3 |
| <i>circNDST3</i> | miR-6760-3p           | 2 |
| <i>circNDST3</i> | miR-6761-5p           | 1 |
| <i>circNDST3</i> | miR-6762-3p           | 1 |
| <i>circNDST3</i> | miR-6765-5p           | 2 |
| <i>circNDST3</i> | miR-6768-5p           | 2 |
| <i>circNDST3</i> | miR-6769a-3p          | 2 |
| <i>circNDST3</i> | miR-6769a-5p/6769b-5p | 1 |
| <i>circNDST3</i> | miR-6772-3p           | 1 |
| <i>circNDST3</i> | miR-6773-3p           | 2 |
| <i>circNDST3</i> | miR-6776-3p           | 1 |
| <i>circNDST3</i> | miR-6776-5p           | 1 |
| <i>circNDST3</i> | miR-6780a-3p          | 1 |
| <i>circNDST3</i> | miR-6782-3p           | 7 |
| <i>circNDST3</i> | miR-6784-3p/6862-3p   | 2 |
| <i>circNDST3</i> | miR-6788-3p           | 2 |
| <i>circNDST3</i> | miR-6792-5p           | 4 |
| <i>circNDST3</i> | miR-6793-3p           | 3 |
| <i>circNDST3</i> | miR-6796-3p           | 2 |
| <i>circNDST3</i> | miR-6796-5p           | 2 |
| <i>circNDST3</i> | miR-6798-5p           | 2 |
| <i>circNDST3</i> | miR-6800-5p           | 4 |
| <i>circNDST3</i> | miR-6802-5p           | 4 |
| <i>circNDST3</i> | miR-6804-3p           | 2 |
| <i>circNDST3</i> | miR-6809-5p           | 2 |
| <i>circNDST3</i> | miR-6815-3p           | 4 |
| <i>circNDST3</i> | miR-6815-5p/6865-5p   | 1 |
| <i>circNDST3</i> | miR-6816-3p           | 2 |
| <i>circNDST3</i> | miR-6817-3p           | 2 |
| <i>circNDST3</i> | miR-6819-3p/6877-3p   | 2 |
| <i>circNDST3</i> | miR-6822-3p           | 2 |
| <i>circNDST3</i> | miR-6825-3p           | 1 |
| <i>circNDST3</i> | miR-6828-3p           | 1 |

|                  |             |   |
|------------------|-------------|---|
| <i>circNDST3</i> | miR-6829-5p | 1 |
| <i>circNDST3</i> | miR-6830-3p | 2 |
| <i>circNDST3</i> | miR-6830-5p | 2 |
| <i>circNDST3</i> | miR-6832-3p | 4 |
| <i>circNDST3</i> | miR-6833-5p | 6 |
| <i>circNDST3</i> | miR-6834-3p | 2 |
| <i>circNDST3</i> | miR-6840-3p | 3 |
| <i>circNDST3</i> | miR-6844    | 3 |
| <i>circNDST3</i> | miR-6846-3p | 2 |
| <i>circNDST3</i> | miR-6847-3p | 2 |
| <i>circNDST3</i> | miR-6852-5p | 1 |
| <i>circNDST3</i> | miR-6853-3p | 4 |
| <i>circNDST3</i> | miR-6854-5p | 2 |
| <i>circNDST3</i> | miR-6859-3p | 2 |
| <i>circNDST3</i> | miR-6861-5p | 1 |
| <i>circNDST3</i> | miR-6867-3p | 2 |
| <i>circNDST3</i> | miR-6868-3p | 1 |
| <i>circNDST3</i> | miR-6869-5p | 3 |
| <i>circNDST3</i> | miR-6870-3p | 1 |
| <i>circNDST3</i> | miR-6871-3p | 4 |
| <i>circNDST3</i> | miR-6878-5p | 3 |
| <i>circNDST3</i> | miR-6879-3p | 2 |
| <i>circNDST3</i> | miR-6881-3p | 1 |
| <i>circNDST3</i> | miR-6884-3p | 2 |
| <i>circNDST3</i> | miR-6888-3p | 4 |
| <i>circNDST3</i> | miR-6888-5p | 4 |
| <i>circNDST3</i> | miR-6890-3p | 1 |
| <i>circNDST3</i> | miR-6892-3p | 2 |
| <i>circNDST3</i> | miR-6892-5p | 1 |
| <i>circNDST3</i> | miR-6895-5p | 1 |
| <i>circNDST3</i> | miR-7-5p    | 4 |
| <i>circNDST3</i> | miR-7110-3p | 2 |
| <i>circNDST3</i> | miR-7111-3p | 1 |
| <i>circNDST3</i> | miR-7112-3p | 2 |
| <i>circNDST3</i> | miR-7113-3p | 2 |
| <i>circNDST3</i> | miR-7113-5p | 2 |
| <i>circNDST3</i> | miR-7114-5p | 2 |
| <i>circNDST3</i> | miR-7151-5p | 2 |

|                  |                           |   |
|------------------|---------------------------|---|
| <i>circNDST3</i> | miR-7152-5p               | 3 |
| <i>circNDST3</i> | miR-7154-5p               | 4 |
| <i>circNDST3</i> | miR-7155-5p               | 2 |
| <i>circNDST3</i> | miR-7156-3p               | 4 |
| <i>circNDST3</i> | miR-7158-3p               | 3 |
| <i>circNDST3</i> | miR-7160-3p               | 1 |
| <i>circNDST3</i> | miR-7161-3p               | 3 |
| <i>circNDST3</i> | miR-744-3p                | 2 |
| <i>circNDST3</i> | miR-758-3p                | 1 |
| <i>circNDST3</i> | miR-758-5p                | 4 |
| <i>circNDST3</i> | miR-760                   | 2 |
| <i>circNDST3</i> | miR-762/4492/4498/5001-5p | 1 |
| <i>circNDST3</i> | miR-7641                  | 1 |
| <i>circNDST3</i> | miR-767-3p                | 1 |
| <i>circNDST3</i> | miR-767-5p                | 2 |
| <i>circNDST3</i> | miR-770-5p                | 2 |
| <i>circNDST3</i> | miR-7703                  | 1 |
| <i>circNDST3</i> | miR-7704                  | 4 |
| <i>circNDST3</i> | miR-7705                  | 1 |
| <i>circNDST3</i> | miR-7843-3p               | 6 |
| <i>circNDST3</i> | miR-7844-5p               | 1 |
| <i>circNDST3</i> | miR-7849-3p               | 1 |
| <i>circNDST3</i> | miR-7852-3p               | 1 |
| <i>circNDST3</i> | miR-7854-3p               | 1 |
| <i>circNDST3</i> | miR-7856-5p               | 1 |
| <i>circNDST3</i> | miR-7975                  | 1 |
| <i>circNDST3</i> | miR-7977                  | 2 |
| <i>circNDST3</i> | miR-802                   | 2 |
| <i>circNDST3</i> | miR-8055                  | 1 |
| <i>circNDST3</i> | miR-8057                  | 3 |
| <i>circNDST3</i> | miR-8060                  | 2 |
| <i>circNDST3</i> | miR-8066                  | 3 |
| <i>circNDST3</i> | miR-8068                  | 3 |
| <i>circNDST3</i> | miR-8069                  | 2 |
| <i>circNDST3</i> | miR-8070                  | 3 |
| <i>circNDST3</i> | miR-8074                  | 1 |
| <i>circNDST3</i> | miR-8076                  | 5 |
| <i>circNDST3</i> | miR-8080                  | 2 |

|                  |                     |   |
|------------------|---------------------|---|
| <i>circNDST3</i> | miR-8083            | 4 |
| <i>circNDST3</i> | miR-8084            | 2 |
| <i>circNDST3</i> | miR-873-5p.1        | 2 |
| <i>circNDST3</i> | miR-875-3p          | 1 |
| <i>circNDST3</i> | miR-885-3p          | 1 |
| <i>circNDST3</i> | miR-885-5p          | 2 |
| <i>circNDST3</i> | miR-888-5p          | 1 |
| <i>circNDST3</i> | miR-889-5p          | 1 |
| <i>circNDST3</i> | miR-891a-3p         | 4 |
| <i>circNDST3</i> | miR-892-5p          | 1 |
| <i>circNDST3</i> | miR-892a            | 2 |
| <i>circNDST3</i> | miR-892b            | 1 |
| <i>circNDST3</i> | miR-9-5p            | 2 |
| <i>circNDST3</i> | miR-922             | 1 |
| <i>circNDST3</i> | miR-92a-2-5p        | 1 |
| <i>circNDST3</i> | miR-93-3p           | 1 |
| <i>circNDST3</i> | miR-935             | 1 |
| <i>circNDST3</i> | miR-939-3p          | 1 |
| <i>circNDST3</i> | miR-943             | 2 |
| <i>circNDST3</i> | miR-95-5p           | 1 |
| <i>circNDST3</i> | miR-9500            | 2 |
| <i>circNDST3</i> | miR-96-3p           | 2 |
| <i>circNDST3</i> | miR-96-5p/1271-5p   | 3 |
| <i>circNDST3</i> | miR-99-3p           | 2 |
| <i>circNDST3</i> | miR-1-3p/206        | 1 |
| <i>circNDST3</i> | miR-1226-5p         | 1 |
| <i>circNDST3</i> | miR-1236-5p         | 1 |
| <i>circNDST3</i> | miR-1237-3p         | 1 |
| <i>circNDST3</i> | miR-1238-5p/4758-5p | 1 |
| <i>circNDST3</i> | miR-1245b-3p        | 1 |
| <i>circNDST3</i> | miR-1245b-5p        | 1 |
| <i>circNDST3</i> | miR-1248            | 1 |
| <i>circNDST3</i> | miR-1261            | 4 |
| <i>circNDST3</i> | miR-128-1-5p        | 1 |
| <i>circNDST3</i> | miR-1287-3p         | 1 |
| <i>circNDST3</i> | miR-1301-5p/6502-5p | 1 |
| <i>circNDST3</i> | miR-133a-5p         | 1 |
| <i>circNDST3</i> | miR-138-5p          | 1 |

|                  |                      |   |
|------------------|----------------------|---|
| <i>circNDST3</i> | miR-146-5p           | 1 |
| <i>circNDST3</i> | miR-1468-5p          | 1 |
| <i>circNDST3</i> | miR-1470             | 1 |
| <i>circNDST3</i> | miR-148-3p/152-3p    | 1 |
| <i>circNDST3</i> | miR-148b-5p/6874-3p  | 1 |
| <i>circNDST3</i> | miR-1911-3p          | 1 |
| <i>circNDST3</i> | miR-197-5p/3132      | 1 |
| <i>circNDST3</i> | miR-1972             | 1 |
| <i>circNDST3</i> | miR-1973             | 1 |
| <i>circNDST3</i> | miR-2117             | 1 |
| <i>circNDST3</i> | miR-212-5p           | 1 |
| <i>circNDST3</i> | miR-296-3p           | 1 |
| <i>circNDST3</i> | miR-299-3p           | 1 |
| <i>circNDST3</i> | miR-302c-3p.2/520-3p | 1 |
| <i>circNDST3</i> | miR-3122/3913-5p     | 1 |
| <i>circNDST3</i> | miR-3145-3p          | 2 |
| <i>circNDST3</i> | miR-3168             | 1 |
| <i>circNDST3</i> | miR-3185             | 1 |
| <i>circNDST3</i> | miR-3189-3p          | 1 |
| <i>circNDST3</i> | miR-3201/4791        | 2 |
| <i>circNDST3</i> | miR-320e             | 1 |
| <i>circNDST3</i> | miR-331-3p           | 1 |
| <i>circNDST3</i> | miR-365-3p           | 1 |
| <i>circNDST3</i> | miR-3650             | 1 |
| <i>circNDST3</i> | miR-3690             | 1 |
| <i>circNDST3</i> | miR-3691-5p          | 2 |
| <i>circNDST3</i> | miR-376b-5p/376c-5p  | 4 |
| <i>circNDST3</i> | miR-378j/6839-5p     | 1 |
| <i>circNDST3</i> | miR-423-5p           | 1 |
| <i>circNDST3</i> | miR-4254             | 1 |
| <i>circNDST3</i> | miR-4276             | 1 |
| <i>circNDST3</i> | miR-4292/6791-5p     | 1 |
| <i>circNDST3</i> | miR-4299             | 1 |
| <i>circNDST3</i> | miR-4308             | 1 |
| <i>circNDST3</i> | miR-4456             | 1 |
| <i>circNDST3</i> | miR-4491/4657        | 1 |
| <i>circNDST3</i> | miR-450a-1-3p        | 1 |
| <i>circNDST3</i> | miR-4521             | 1 |

|                  |                       |   |
|------------------|-----------------------|---|
| <i>circNDST3</i> | miR-4640-3p           | 1 |
| <i>circNDST3</i> | miR-4640-5p           | 1 |
| <i>circNDST3</i> | miR-4641              | 1 |
| <i>circNDST3</i> | miR-4645-5p/4673      | 1 |
| <i>circNDST3</i> | miR-4650-5p           | 1 |
| <i>circNDST3</i> | miR-4658/6790-5p      | 1 |
| <i>circNDST3</i> | miR-4659a-3p/4659b-3p | 2 |
| <i>circNDST3</i> | miR-4667-3p           | 1 |
| <i>circNDST3</i> | miR-4691-5p/6792-3p   | 1 |
| <i>circNDST3</i> | miR-4694-3p           | 1 |
| <i>circNDST3</i> | miR-4751              | 1 |
| <i>circNDST3</i> | miR-4757-5p/6744-3p   | 1 |
| <i>circNDST3</i> | miR-4765              | 1 |
| <i>circNDST3</i> | miR-4790-3p           | 1 |
| <i>circNDST3</i> | miR-5004-3p           | 1 |
| <i>circNDST3</i> | miR-5004-5p           | 1 |
| <i>circNDST3</i> | miR-5087              | 1 |
| <i>circNDST3</i> | miR-512-3p            | 1 |
| <i>circNDST3</i> | miR-5190              | 1 |
| <i>circNDST3</i> | miR-5193              | 1 |
| <i>circNDST3</i> | miR-5194              | 1 |
| <i>circNDST3</i> | miR-5195-5p           | 1 |
| <i>circNDST3</i> | miR-520f-5p           | 1 |
| <i>circNDST3</i> | miR-522-3p            | 1 |
| <i>circNDST3</i> | miR-525-5p            | 1 |
| <i>circNDST3</i> | miR-548q              | 1 |
| <i>circNDST3</i> | miR-5580-5p           | 1 |
| <i>circNDST3</i> | miR-5584-3p           | 1 |
| <i>circNDST3</i> | miR-5586-5p           | 1 |
| <i>circNDST3</i> | miR-5691              | 1 |
| <i>circNDST3</i> | miR-576-3p            | 1 |
| <i>circNDST3</i> | miR-589-5p            | 1 |
| <i>circNDST3</i> | miR-6131              | 1 |
| <i>circNDST3</i> | miR-629-3p            | 1 |
| <i>circNDST3</i> | miR-635/6774-5p       | 1 |
| <i>circNDST3</i> | miR-6508-3p           | 1 |
| <i>circNDST3</i> | miR-651-5p            | 1 |
| <i>circNDST3</i> | miR-6513-5p           | 1 |



|                  |                     |   |
|------------------|---------------------|---|
| <i>circNDST3</i> | miR-660-3p          | 1 |
| <i>circNDST3</i> | miR-6734-5p         | 1 |
| <i>circNDST3</i> | miR-6749-3p         | 1 |
| <i>circNDST3</i> | miR-6755-5p         | 1 |
| <i>circNDST3</i> | miR-6759-3p         | 1 |
| <i>circNDST3</i> | miR-6762-5p/6845-5p | 1 |
| <i>circNDST3</i> | miR-6771-3p         | 1 |
| <i>circNDST3</i> | miR-6786-3p         | 1 |
| <i>circNDST3</i> | miR-6795-3p         | 1 |
| <i>circNDST3</i> | miR-6801-3p/6810-3p | 1 |
| <i>circNDST3</i> | miR-6823-5p         | 1 |
| <i>circNDST3</i> | miR-6834-5p         | 1 |
| <i>circNDST3</i> | miR-6841-5p         | 1 |
| <i>circNDST3</i> | miR-6875-3p         | 2 |
| <i>circNDST3</i> | miR-6887-3p         | 1 |
| <i>circNDST3</i> | miR-711             | 1 |
| <i>circNDST3</i> | miR-7153-3p         | 1 |
| <i>circNDST3</i> | miR-764             | 1 |
| <i>circNDST3</i> | miR-7855-5p         | 2 |
| <i>circNDST3</i> | miR-7978            | 1 |
| <i>circNDST3</i> | miR-8056            | 2 |
| <i>circNDST3</i> | miR-887-5p          | 1 |
| <i>circNDST3</i> | miR-889-3p          | 1 |
| <i>circNDST3</i> | miR-9-3p            | 1 |
| <i>circNEBL</i>  | miR-1-3p/206        | 5 |
| <i>circNEBL</i>  | miR-100-3p          | 2 |
| <i>circNEBL</i>  | miR-103-3p/107      | 2 |
| <i>circNEBL</i>  | miR-103b            | 1 |
| <i>circNEBL</i>  | miR-105-3p          | 1 |
| <i>circNEBL</i>  | miR-1178-3p         | 1 |
| <i>circNEBL</i>  | miR-1184            | 2 |
| <i>circNEBL</i>  | miR-1185-5p         | 2 |
| <i>circNEBL</i>  | miR-1193            | 2 |
| <i>circNEBL</i>  | miR-1197            | 3 |
| <i>circNEBL</i>  | miR-1200            | 1 |
| <i>circNEBL</i>  | miR-1205            | 2 |
| <i>circNEBL</i>  | miR-1224-5p         | 2 |
| <i>circNEBL</i>  | miR-1225-3p         | 2 |

|                 |                          |   |
|-----------------|--------------------------|---|
| <i>circNEBL</i> | miR-1226-5p              | 2 |
| <i>circNEBL</i> | miR-1233-3p              | 3 |
| <i>circNEBL</i> | miR-1236-5p              | 2 |
| <i>circNEBL</i> | miR-1237-3p              | 2 |
| <i>circNEBL</i> | miR-1237-5p/4488/4697-5p | 1 |
| <i>circNEBL</i> | miR-124-3p.1             | 3 |
| <i>circNEBL</i> | miR-1243                 | 2 |
| <i>circNEBL</i> | miR-1245b-3p             | 2 |
| <i>circNEBL</i> | miR-1246                 | 3 |
| <i>circNEBL</i> | miR-1247-3p              | 2 |
| <i>circNEBL</i> | miR-1248                 | 2 |
| <i>circNEBL</i> | miR-1250-3p              | 5 |
| <i>circNEBL</i> | miR-1252-3p              | 8 |
| <i>circNEBL</i> | miR-1252-5p              | 4 |
| <i>circNEBL</i> | miR-1253                 | 3 |
| <i>circNEBL</i> | miR-1255a/1255b-5p       | 1 |
| <i>circNEBL</i> | miR-125a-3p              | 2 |
| <i>circNEBL</i> | miR-1261                 | 3 |
| <i>circNEBL</i> | miR-1266-5p/4518         | 1 |
| <i>circNEBL</i> | miR-127-5p               | 1 |
| <i>circNEBL</i> | miR-1270                 | 1 |
| <i>circNEBL</i> | miR-1273e                | 2 |
| <i>circNEBL</i> | miR-1273f                | 1 |
| <i>circNEBL</i> | miR-1273h-3p             | 3 |
| <i>circNEBL</i> | miR-1276                 | 6 |
| <i>circNEBL</i> | miR-1277-5p              | 5 |
| <i>circNEBL</i> | miR-128-1-5p             | 1 |
| <i>circNEBL</i> | miR-1289                 | 1 |
| <i>circNEBL</i> | miR-129-5p               | 2 |
| <i>circNEBL</i> | miR-1290                 | 5 |
| <i>circNEBL</i> | miR-1292-5p              | 2 |
| <i>circNEBL</i> | miR-1298-3p              | 1 |
| <i>circNEBL</i> | miR-1299                 | 1 |
| <i>circNEBL</i> | miR-130-3p/301-3p/454-3p | 1 |
| <i>circNEBL</i> | miR-1301-3p              | 2 |
| <i>circNEBL</i> | miR-1304-5p              | 2 |
| <i>circNEBL</i> | miR-1305                 | 5 |
| <i>circNEBL</i> | miR-130b-5p              | 2 |

|                 |                                     |   |
|-----------------|-------------------------------------|---|
| <i>circNEBL</i> | miR-1323                            | 1 |
| <i>circNEBL</i> | miR-1324                            | 1 |
| <i>circNEBL</i> | miR-133a-3p.2/133b                  | 1 |
| <i>circNEBL</i> | miR-139-3p                          | 3 |
| <i>circNEBL</i> | miR-142-5p                          | 1 |
| <i>circNEBL</i> | miR-143-3p                          | 1 |
| <i>circNEBL</i> | miR-144-5p                          | 5 |
| <i>circNEBL</i> | miR-148a-5p                         | 1 |
| <i>circNEBL</i> | miR-148b-5p/6874-3p                 | 2 |
| <i>circNEBL</i> | miR-149-3p/4728-5p/6785-5p/6883-5p  | 1 |
| <i>circNEBL</i> | miR-153-5p                          | 2 |
| <i>circNEBL</i> | miR-154-3p/487-3p                   | 1 |
| <i>circNEBL</i> | miR-17-3p                           | 2 |
| <i>circNEBL</i> | miR-17-5p/20-5p/93-5p/106-5p/519-3p | 3 |
| <i>circNEBL</i> | miR-181-3p/4420                     | 3 |
| <i>circNEBL</i> | miR-183-3p                          | 2 |
| <i>circNEBL</i> | miR-183-5p.1                        | 2 |
| <i>circNEBL</i> | miR-183-5p.2                        | 1 |
| <i>circNEBL</i> | miR-186-5p                          | 4 |
| <i>circNEBL</i> | miR-19-3p                           | 1 |
| <i>circNEBL</i> | miR-192-3p                          | 2 |
| <i>circNEBL</i> | miR-197-3p                          | 2 |
| <i>circNEBL</i> | miR-1976                            | 1 |
| <i>circNEBL</i> | miR-198                             | 1 |
| <i>circNEBL</i> | miR-200c-5p/550a-3p                 | 2 |
| <i>circNEBL</i> | miR-203a-3p.1                       | 3 |
| <i>circNEBL</i> | miR-204-3p/4646-5p                  | 1 |
| <i>circNEBL</i> | miR-208-3p                          | 1 |
| <i>circNEBL</i> | miR-2114-3p                         | 1 |
| <i>circNEBL</i> | miR-2115-3p                         | 1 |
| <i>circNEBL</i> | miR-2116-5p                         | 2 |
| <i>circNEBL</i> | miR-216a-5p                         | 3 |
| <i>circNEBL</i> | miR-216b-5p                         | 3 |
| <i>circNEBL</i> | miR-219b-5p                         | 1 |
| <i>circNEBL</i> | miR-22-5p                           | 2 |
| <i>circNEBL</i> | miR-223-5p                          | 3 |
| <i>circNEBL</i> | miR-2278                            | 2 |
| <i>circNEBL</i> | miR-24-3p                           | 1 |

|                 |                          |   |
|-----------------|--------------------------|---|
| <i>circNEBL</i> | miR-2467-3p              | 3 |
| <i>circNEBL</i> | miR-2467-5p              | 2 |
| <i>circNEBL</i> | miR-26-3p                | 1 |
| <i>circNEBL</i> | miR-26-5p                | 4 |
| <i>circNEBL</i> | miR-2681-3p              | 1 |
| <i>circNEBL</i> | miR-2681-5p              | 2 |
| <i>circNEBL</i> | miR-2682-3p/6781-3p      | 1 |
| <i>circNEBL</i> | miR-2861                 | 1 |
| <i>circNEBL</i> | miR-299-3p               | 1 |
| <i>circNEBL</i> | miR-301a-5p/301b-5p      | 1 |
| <i>circNEBL</i> | miR-302b-5p/302d-5p      | 3 |
| <i>circNEBL</i> | miR-302c-3p.2/520-3p     | 3 |
| <i>circNEBL</i> | miR-302c-5p              | 1 |
| <i>circNEBL</i> | miR-3064-5p              | 1 |
| <i>circNEBL</i> | miR-3065-5p              | 1 |
| <i>circNEBL</i> | miR-3074-3p              | 1 |
| <i>circNEBL</i> | miR-31-5p                | 1 |
| <i>circNEBL</i> | miR-3117-5p              | 1 |
| <i>circNEBL</i> | miR-3123                 | 3 |
| <i>circNEBL</i> | miR-3125/3916/6859-5p    | 4 |
| <i>circNEBL</i> | miR-3126-3p              | 1 |
| <i>circNEBL</i> | miR-3126-5p              | 2 |
| <i>circNEBL</i> | miR-3128                 | 1 |
| <i>circNEBL</i> | miR-3130-3p              | 1 |
| <i>circNEBL</i> | miR-3133                 | 4 |
| <i>circNEBL</i> | miR-3134                 | 1 |
| <i>circNEBL</i> | miR-3140-5p              | 1 |
| <i>circNEBL</i> | miR-3145-3p              | 2 |
| <i>circNEBL</i> | miR-3145-5p              | 3 |
| <i>circNEBL</i> | miR-3148                 | 3 |
| <i>circNEBL</i> | miR-3153/6733-5p/6739-5p | 6 |
| <i>circNEBL</i> | miR-3154                 | 6 |
| <i>circNEBL</i> | miR-3158-5p              | 2 |
| <i>circNEBL</i> | miR-3159                 | 2 |
| <i>circNEBL</i> | miR-3160-5p              | 2 |
| <i>circNEBL</i> | miR-3163                 | 8 |
| <i>circNEBL</i> | miR-3168                 | 2 |
| <i>circNEBL</i> | miR-3169                 | 2 |

|                 |                     |    |
|-----------------|---------------------|----|
| <i>circNEBL</i> | miR-3173-3p/6891-5p | 3  |
| <i>circNEBL</i> | miR-3174            | 5  |
| <i>circNEBL</i> | miR-3182            | 3  |
| <i>circNEBL</i> | miR-3185            | 11 |
| <i>circNEBL</i> | miR-3187-3p         | 1  |
| <i>circNEBL</i> | miR-3188            | 2  |
| <i>circNEBL</i> | miR-3190-3p         | 4  |
| <i>circNEBL</i> | miR-3192-5p         | 1  |
| <i>circNEBL</i> | miR-3194-5p         | 2  |
| <i>circNEBL</i> | miR-3198/4309       | 1  |
| <i>circNEBL</i> | miR-320             | 1  |
| <i>circNEBL</i> | miR-3200-5p         | 2  |
| <i>circNEBL</i> | miR-3201/4791       | 2  |
| <i>circNEBL</i> | miR-3202            | 2  |
| <i>circNEBL</i> | miR-320e            | 1  |
| <i>circNEBL</i> | miR-323-3p          | 1  |
| <i>circNEBL</i> | miR-323a-5p         | 1  |
| <i>circNEBL</i> | miR-324-5p          | 1  |
| <i>circNEBL</i> | miR-330-3p          | 1  |
| <i>circNEBL</i> | miR-330-3p.2        | 1  |
| <i>circNEBL</i> | miR-335-3p          | 3  |
| <i>circNEBL</i> | miR-335-5p          | 2  |
| <i>circNEBL</i> | miR-338-5p          | 2  |
| <i>circNEBL</i> | miR-33a-3p          | 2  |
| <i>circNEBL</i> | miR-340-5p          | 6  |
| <i>circNEBL</i> | miR-345-3p          | 1  |
| <i>circNEBL</i> | miR-34b-3p          | 2  |
| <i>circNEBL</i> | miR-34c-3p          | 2  |
| <i>circNEBL</i> | miR-3591-5p         | 1  |
| <i>circNEBL</i> | miR-3605-5p         | 2  |
| <i>circNEBL</i> | miR-3607-3p         | 3  |
| <i>circNEBL</i> | miR-361-5p          | 1  |
| <i>circNEBL</i> | miR-3612            | 1  |
| <i>circNEBL</i> | miR-362-5p/500b-5p  | 2  |
| <i>circNEBL</i> | miR-3620-3p         | 1  |
| <i>circNEBL</i> | miR-3646            | 8  |
| <i>circNEBL</i> | miR-365-3p          | 1  |
| <i>circNEBL</i> | miR-3651            | 2  |

|                 |                           |   |
|-----------------|---------------------------|---|
| <i>circNEBL</i> | miR-3653-3p               | 4 |
| <i>circNEBL</i> | miR-3653-5p               | 1 |
| <i>circNEBL</i> | miR-3654                  | 2 |
| <i>circNEBL</i> | miR-3658                  | 1 |
| <i>circNEBL</i> | miR-3660/4526             | 1 |
| <i>circNEBL</i> | miR-3662                  | 8 |
| <i>circNEBL</i> | miR-3663-3p               | 1 |
| <i>circNEBL</i> | miR-3664-3p               | 1 |
| <i>circNEBL</i> | miR-3665                  | 1 |
| <i>circNEBL</i> | miR-3667-5p               | 4 |
| <i>circNEBL</i> | miR-3671                  | 2 |
| <i>circNEBL</i> | miR-3672/6864-3p          | 1 |
| <i>circNEBL</i> | miR-3675-3p               | 2 |
| <i>circNEBL</i> | miR-3678-3p               | 3 |
| <i>circNEBL</i> | miR-3688-3p               | 3 |
| <i>circNEBL</i> | miR-3689d/6851-5p         | 1 |
| <i>circNEBL</i> | miR-3690                  | 1 |
| <i>circNEBL</i> | miR-3691-3p               | 1 |
| <i>circNEBL</i> | miR-371-5p                | 1 |
| <i>circNEBL</i> | miR-3714                  | 3 |
| <i>circNEBL</i> | miR-371b-5p/373-5p/616-5p | 1 |
| <i>circNEBL</i> | miR-372-5p                | 1 |
| <i>circNEBL</i> | miR-375                   | 5 |
| <i>circNEBL</i> | miR-376a-2-5p             | 2 |
| <i>circNEBL</i> | miR-376a-5p               | 2 |
| <i>circNEBL</i> | miR-376b-5p/376c-5p       | 3 |
| <i>circNEBL</i> | miR-378a-5p               | 1 |
| <i>circNEBL</i> | miR-378j/6839-5p          | 4 |
| <i>circNEBL</i> | miR-379-5p                | 1 |
| <i>circNEBL</i> | miR-381-3p                | 4 |
| <i>circNEBL</i> | miR-382-3p                | 4 |
| <i>circNEBL</i> | miR-3910                  | 3 |
| <i>circNEBL</i> | miR-3912-5p               | 1 |
| <i>circNEBL</i> | miR-3913-3p               | 2 |
| <i>circNEBL</i> | miR-3915                  | 2 |
| <i>circNEBL</i> | miR-3919                  | 6 |
| <i>circNEBL</i> | miR-3921/4653-5p          | 1 |
| <i>circNEBL</i> | miR-3925-3p               | 3 |

|                 |                                    |   |
|-----------------|------------------------------------|---|
| <i>circNEBL</i> | miR-3925-5p                        | 3 |
| <i>circNEBL</i> | miR-3928-3p                        | 1 |
| <i>circNEBL</i> | miR-3929/4419b/4478                | 3 |
| <i>circNEBL</i> | miR-3934-3p                        | 1 |
| <i>circNEBL</i> | miR-3934-5p                        | 2 |
| <i>circNEBL</i> | miR-3936                           | 2 |
| <i>circNEBL</i> | miR-3942-3p                        | 5 |
| <i>circNEBL</i> | miR-3973                           | 3 |
| <i>circNEBL</i> | miR-3974                           | 2 |
| <i>circNEBL</i> | miR-3975                           | 2 |
| <i>circNEBL</i> | miR-3978                           | 3 |
| <i>circNEBL</i> | miR-409-3p                         | 2 |
| <i>circNEBL</i> | miR-410-3p                         | 4 |
| <i>circNEBL</i> | miR-421                            | 1 |
| <i>circNEBL</i> | miR-425-5p                         | 1 |
| <i>circNEBL</i> | miR-4254                           | 1 |
| <i>circNEBL</i> | miR-4263                           | 4 |
| <i>circNEBL</i> | miR-4273/7156-5p                   | 1 |
| <i>circNEBL</i> | miR-4282                           | 4 |
| <i>circNEBL</i> | miR-4284                           | 1 |
| <i>circNEBL</i> | miR-4294                           | 1 |
| <i>circNEBL</i> | miR-4303                           | 3 |
| <i>circNEBL</i> | miR-4310/7157-5p                   | 2 |
| <i>circNEBL</i> | miR-4311                           | 6 |
| <i>circNEBL</i> | miR-4312                           | 1 |
| <i>circNEBL</i> | miR-4314                           | 1 |
| <i>circNEBL</i> | miR-433-3p                         | 2 |
| <i>circNEBL</i> | miR-4330                           | 1 |
| <i>circNEBL</i> | miR-4419a/4510/6127/6129/6130/6133 | 2 |
| <i>circNEBL</i> | miR-4422                           | 1 |
| <i>circNEBL</i> | miR-4426/4647/4662b                | 4 |
| <i>circNEBL</i> | miR-4428                           | 3 |
| <i>circNEBL</i> | miR-4432                           | 3 |
| <i>circNEBL</i> | miR-4434/4516/5703                 | 2 |
| <i>circNEBL</i> | miR-4435                           | 1 |
| <i>circNEBL</i> | miR-4451                           | 1 |
| <i>circNEBL</i> | miR-4452                           | 2 |
| <i>circNEBL</i> | miR-4463                           | 1 |

|                 |                  |   |
|-----------------|------------------|---|
| <i>circNEBL</i> | miR-4471/8059    | 2 |
| <i>circNEBL</i> | miR-4473         | 2 |
| <i>circNEBL</i> | miR-4475         | 7 |
| <i>circNEBL</i> | miR-4476/6876-5p | 2 |
| <i>circNEBL</i> | miR-4480         | 4 |
| <i>circNEBL</i> | miR-4484         | 2 |
| <i>circNEBL</i> | miR-4491/4657    | 1 |
| <i>circNEBL</i> | miR-4493         | 2 |
| <i>circNEBL</i> | miR-4495         | 2 |
| <i>circNEBL</i> | miR-4496         | 3 |
| <i>circNEBL</i> | miR-4499         | 1 |
| <i>circNEBL</i> | miR-4509         | 1 |
| <i>circNEBL</i> | miR-4513/6855-3p | 1 |
| <i>circNEBL</i> | miR-4517         | 3 |
| <i>circNEBL</i> | miR-4524-5p      | 1 |
| <i>circNEBL</i> | miR-4524a-3p     | 1 |
| <i>circNEBL</i> | miR-4531         | 1 |
| <i>circNEBL</i> | miR-4533         | 2 |
| <i>circNEBL</i> | miR-4534/8082    | 1 |
| <i>circNEBL</i> | miR-4536-5p      | 1 |
| <i>circNEBL</i> | miR-4635         | 5 |
| <i>circNEBL</i> | miR-4639-3p      | 1 |
| <i>circNEBL</i> | miR-4639-5p      | 2 |
| <i>circNEBL</i> | miR-4649-3p      | 3 |
| <i>circNEBL</i> | miR-4650-3p      | 1 |
| <i>circNEBL</i> | miR-4662-5p      | 2 |
| <i>circNEBL</i> | miR-4666a-3p     | 4 |
| <i>circNEBL</i> | miR-4666a-5p     | 2 |
| <i>circNEBL</i> | miR-4668-5p      | 6 |
| <i>circNEBL</i> | miR-4670-3p      | 2 |
| <i>circNEBL</i> | miR-4671-3p      | 2 |
| <i>circNEBL</i> | miR-4677-5p      | 1 |
| <i>circNEBL</i> | miR-4680-5p      | 1 |
| <i>circNEBL</i> | miR-4683         | 3 |
| <i>circNEBL</i> | miR-4684-3p      | 1 |
| <i>circNEBL</i> | miR-4686         | 2 |
| <i>circNEBL</i> | miR-4687-3p      | 1 |
| <i>circNEBL</i> | miR-4689/6858-5p | 2 |



|                 |                             |   |
|-----------------|-----------------------------|---|
| <i>circNEBL</i> | miR-4691-3p                 | 1 |
| <i>circNEBL</i> | miR-4694-3p                 | 2 |
| <i>circNEBL</i> | miR-4695-5p                 | 1 |
| <i>circNEBL</i> | miR-4699-5p                 | 2 |
| <i>circNEBL</i> | miR-4708-5p                 | 1 |
| <i>circNEBL</i> | miR-4709-3p                 | 7 |
| <i>circNEBL</i> | miR-4710                    | 2 |
| <i>circNEBL</i> | miR-4712-3p                 | 2 |
| <i>circNEBL</i> | miR-4714-3p                 | 2 |
| <i>circNEBL</i> | miR-4716-3p/6794-5p         | 1 |
| <i>circNEBL</i> | miR-4720-5p/4799-3p/5588-5p | 1 |
| <i>circNEBL</i> | miR-4724-5p                 | 3 |
| <i>circNEBL</i> | miR-4725-5p                 | 1 |
| <i>circNEBL</i> | miR-4728-3p                 | 2 |
| <i>circNEBL</i> | miR-4733-5p                 | 2 |
| <i>circNEBL</i> | miR-4738-3p                 | 2 |
| <i>circNEBL</i> | miR-4739                    | 4 |
| <i>circNEBL</i> | miR-4744                    | 1 |
| <i>circNEBL</i> | miR-4751                    | 2 |
| <i>circNEBL</i> | miR-4752                    | 2 |
| <i>circNEBL</i> | miR-4753-3p                 | 1 |
| <i>circNEBL</i> | miR-4755-3p                 | 1 |
| <i>circNEBL</i> | miR-4756-3p                 | 6 |
| <i>circNEBL</i> | miR-4759                    | 2 |
| <i>circNEBL</i> | miR-4760-3p                 | 2 |
| <i>circNEBL</i> | miR-4762-3p                 | 4 |
| <i>circNEBL</i> | miR-4762-5p                 | 1 |
| <i>circNEBL</i> | miR-4765                    | 2 |
| <i>circNEBL</i> | miR-4766-5p                 | 5 |
| <i>circNEBL</i> | miR-4778-5p                 | 1 |
| <i>circNEBL</i> | miR-4779                    | 1 |
| <i>circNEBL</i> | miR-4780                    | 2 |
| <i>circNEBL</i> | miR-4781-3p                 | 2 |
| <i>circNEBL</i> | miR-4782-5p/5706            | 1 |
| <i>circNEBL</i> | miR-4790-3p                 | 1 |
| <i>circNEBL</i> | miR-4792                    | 2 |
| <i>circNEBL</i> | miR-4793-3p                 | 1 |
| <i>circNEBL</i> | miR-483-3p.1                | 1 |

|                 |                     |   |
|-----------------|---------------------|---|
| <i>circNEBL</i> | miR-484/3155        | 1 |
| <i>circNEBL</i> | miR-485-5p          | 2 |
| <i>circNEBL</i> | miR-488-5p          | 4 |
| <i>circNEBL</i> | miR-490-5p          | 2 |
| <i>circNEBL</i> | miR-493-3p          | 2 |
| <i>circNEBL</i> | miR-494-3p          | 3 |
| <i>circNEBL</i> | miR-495-3p          | 2 |
| <i>circNEBL</i> | miR-498             | 3 |
| <i>circNEBL</i> | miR-499a-3p/499b-3p | 5 |
| <i>circNEBL</i> | miR-499a-5p         | 1 |
| <i>circNEBL</i> | miR-5002-5p         | 1 |
| <i>circNEBL</i> | miR-5004-5p         | 2 |
| <i>circNEBL</i> | miR-5007-3p         | 1 |
| <i>circNEBL</i> | miR-5009-3p         | 1 |
| <i>circNEBL</i> | miR-500a-3p         | 2 |
| <i>circNEBL</i> | miR-501-5p          | 2 |
| <i>circNEBL</i> | miR-504-3p          | 2 |
| <i>circNEBL</i> | miR-505-3p.2        | 1 |
| <i>circNEBL</i> | miR-506-5p          | 2 |
| <i>circNEBL</i> | miR-508-5p          | 3 |
| <i>circNEBL</i> | miR-510-3p          | 4 |
| <i>circNEBL</i> | miR-510-5p          | 1 |
| <i>circNEBL</i> | miR-512-3p          | 3 |
| <i>circNEBL</i> | miR-513b-3p         | 1 |
| <i>circNEBL</i> | miR-516b-5p         | 1 |
| <i>circNEBL</i> | miR-518-3p          | 1 |
| <i>circNEBL</i> | miR-5186            | 3 |
| <i>circNEBL</i> | miR-5187-5p         | 1 |
| <i>circNEBL</i> | miR-518a-5p/527     | 2 |
| <i>circNEBL</i> | miR-5191            | 2 |
| <i>circNEBL</i> | miR-5197-3p         | 6 |
| <i>circNEBL</i> | miR-5197-5p         | 1 |
| <i>circNEBL</i> | miR-520g-3p         | 3 |
| <i>circNEBL</i> | miR-522-3p          | 2 |
| <i>circNEBL</i> | miR-524-5p          | 3 |
| <i>circNEBL</i> | miR-525-5p          | 3 |
| <i>circNEBL</i> | miR-526b-5p         | 2 |
| <i>circNEBL</i> | miR-539-5p          | 5 |

|                 |                                                                    |   |
|-----------------|--------------------------------------------------------------------|---|
| <i>circNEBL</i> | miR-541-5p                                                         | 1 |
| <i>circNEBL</i> | miR-543                                                            | 1 |
| <i>circNEBL</i> | miR-545-3p                                                         | 1 |
| <i>circNEBL</i> | miR-548ah-5p/3609                                                  | 3 |
| <i>circNEBL</i> | miR-548an                                                          | 2 |
| <i>circNEBL</i> | miR-548ao-3p                                                       | 4 |
| <i>circNEBL</i> | miR-548ao-5p/548ax                                                 | 2 |
| <i>circNEBL</i> | miR-548at-5p                                                       | 5 |
| <i>circNEBL</i> | miR-548av-5p/548k/8054                                             | 6 |
| <i>circNEBL</i> | miR-548aw                                                          | 2 |
| <i>circNEBL</i> | miR-548ay-5p/548au-5p/548as-5p/548ar-5p/548aq-5p/548ap-5p/548am-5p | 6 |
| <i>circNEBL</i> | miR-548c-3p                                                        | 8 |
| <i>circNEBL</i> | miR-548e-5p                                                        | 1 |
| <i>circNEBL</i> | miR-548l                                                           | 6 |
| <i>circNEBL</i> | miR-548p                                                           | 2 |
| <i>circNEBL</i> | miR-548s                                                           | 1 |
| <i>circNEBL</i> | miR-548u/7161-5p                                                   | 2 |
| <i>circNEBL</i> | miR-549a                                                           | 1 |
| <i>circNEBL</i> | miR-552-5p                                                         | 3 |
| <i>circNEBL</i> | miR-555                                                            | 2 |
| <i>circNEBL</i> | miR-5580-5p                                                        | 1 |
| <i>circNEBL</i> | miR-5583-3p                                                        | 3 |
| <i>circNEBL</i> | miR-5584-3p                                                        | 2 |
| <i>circNEBL</i> | miR-5584-5p                                                        | 6 |
| <i>circNEBL</i> | miR-5585-5p                                                        | 2 |
| <i>circNEBL</i> | miR-5587-5p                                                        | 2 |
| <i>circNEBL</i> | miR-561-3p                                                         | 5 |
| <i>circNEBL</i> | miR-5681a                                                          | 5 |
| <i>circNEBL</i> | miR-5687                                                           | 1 |
| <i>circNEBL</i> | miR-5692a                                                          | 5 |
| <i>circNEBL</i> | miR-5696                                                           | 2 |
| <i>circNEBL</i> | miR-5697                                                           | 3 |
| <i>circNEBL</i> | miR-570-3p                                                         | 4 |
| <i>circNEBL</i> | miR-5700                                                           | 5 |
| <i>circNEBL</i> | miR-5702                                                           | 1 |
| <i>circNEBL</i> | miR-573/3616-5p                                                    | 3 |
| <i>circNEBL</i> | miR-575/4676-5p                                                    | 3 |
| <i>circNEBL</i> | miR-576-5p                                                         | 4 |

|                 |                    |   |
|-----------------|--------------------|---|
| <i>circNEBL</i> | miR-577            | 6 |
| <i>circNEBL</i> | miR-578            | 1 |
| <i>circNEBL</i> | miR-579-3p         | 2 |
| <i>circNEBL</i> | miR-580-3p         | 5 |
| <i>circNEBL</i> | miR-583            | 6 |
| <i>circNEBL</i> | miR-587            | 1 |
| <i>circNEBL</i> | miR-588            | 1 |
| <i>circNEBL</i> | miR-590-3p         | 6 |
| <i>circNEBL</i> | miR-604            | 2 |
| <i>circNEBL</i> | miR-605-3p         | 2 |
| <i>circNEBL</i> | miR-606            | 1 |
| <i>circNEBL</i> | miR-607            | 3 |
| <i>circNEBL</i> | miR-6071           | 1 |
| <i>circNEBL</i> | miR-6074           | 1 |
| <i>circNEBL</i> | miR-610            | 1 |
| <i>circNEBL</i> | miR-6124           | 3 |
| <i>circNEBL</i> | miR-6134           | 1 |
| <i>circNEBL</i> | miR-618            | 1 |
| <i>circNEBL</i> | miR-619-3p         | 1 |
| <i>circNEBL</i> | miR-619-5p/6506-5p | 1 |
| <i>circNEBL</i> | miR-624-5p         | 1 |
| <i>circNEBL</i> | miR-625-3p         | 1 |
| <i>circNEBL</i> | miR-627-3p         | 2 |
| <i>circNEBL</i> | miR-630            | 1 |
| <i>circNEBL</i> | miR-631/3661       | 1 |
| <i>circNEBL</i> | miR-636            | 3 |
| <i>circNEBL</i> | miR-641/3617-5p    | 1 |
| <i>circNEBL</i> | miR-643            | 1 |
| <i>circNEBL</i> | miR-6507-5p        | 4 |
| <i>circNEBL</i> | miR-651-3p         | 7 |
| <i>circNEBL</i> | miR-6511-5p        | 2 |
| <i>circNEBL</i> | miR-6513-3p        | 3 |
| <i>circNEBL</i> | miR-6516-3p        | 1 |
| <i>circNEBL</i> | miR-653-3p         | 3 |
| <i>circNEBL</i> | miR-653-5p         | 2 |
| <i>circNEBL</i> | miR-657            | 1 |
| <i>circNEBL</i> | miR-664a-3p        | 1 |
| <i>circNEBL</i> | miR-668-3p         | 1 |

|                 |                     |   |
|-----------------|---------------------|---|
| <i>circNEBL</i> | miR-6719-3p         | 1 |
| <i>circNEBL</i> | miR-6730-3p         | 1 |
| <i>circNEBL</i> | miR-6730-5p         | 5 |
| <i>circNEBL</i> | miR-6731-3p         | 1 |
| <i>circNEBL</i> | miR-6731-5p/8085    | 2 |
| <i>circNEBL</i> | miR-6732-5p         | 1 |
| <i>circNEBL</i> | miR-6734-5p         | 2 |
| <i>circNEBL</i> | miR-6739-3p         | 2 |
| <i>circNEBL</i> | miR-6744-5p         | 1 |
| <i>circNEBL</i> | miR-6750-3p         | 1 |
| <i>circNEBL</i> | miR-6750-5p/6822-5p | 6 |
| <i>circNEBL</i> | miR-6755-5p         | 2 |
| <i>circNEBL</i> | miR-6757-5p         | 1 |
| <i>circNEBL</i> | miR-6758-5p/6856-5p | 1 |
| <i>circNEBL</i> | miR-6760-5p         | 4 |
| <i>circNEBL</i> | miR-6762-3p         | 2 |
| <i>circNEBL</i> | miR-6762-5p/6845-5p | 1 |
| <i>circNEBL</i> | miR-6765-5p         | 2 |
| <i>circNEBL</i> | miR-6768-3p         | 2 |
| <i>circNEBL</i> | miR-6770-5p         | 3 |
| <i>circNEBL</i> | miR-6780b-3p        | 2 |
| <i>circNEBL</i> | miR-6796-3p         | 1 |
| <i>circNEBL</i> | miR-6799-5p         | 1 |
| <i>circNEBL</i> | miR-6805-5p         | 1 |
| <i>circNEBL</i> | miR-6807-5p         | 2 |
| <i>circNEBL</i> | miR-6809-5p         | 1 |
| <i>circNEBL</i> | miR-6814-5p         | 1 |
| <i>circNEBL</i> | miR-6815-5p/6865-5p | 1 |
| <i>circNEBL</i> | miR-6816-3p         | 3 |
| <i>circNEBL</i> | miR-6819-3p/6877-3p | 1 |
| <i>circNEBL</i> | miR-6827-5p         | 2 |
| <i>circNEBL</i> | miR-6828-3p         | 1 |
| <i>circNEBL</i> | miR-6833-5p         | 2 |
| <i>circNEBL</i> | miR-6834-3p         | 1 |
| <i>circNEBL</i> | miR-6834-5p         | 2 |
| <i>circNEBL</i> | miR-6841-5p         | 2 |
| <i>circNEBL</i> | miR-6843-3p/6848-3p | 1 |
| <i>circNEBL</i> | miR-6844            | 1 |

|                 |                     |   |
|-----------------|---------------------|---|
| <i>circNEBL</i> | miR-6846-5p/6848-5p | 1 |
| <i>circNEBL</i> | miR-6849-3p         | 2 |
| <i>circNEBL</i> | miR-6857-3p         | 1 |
| <i>circNEBL</i> | miR-6858-3p         | 3 |
| <i>circNEBL</i> | miR-6865-3p         | 2 |
| <i>circNEBL</i> | miR-6868-3p         | 2 |
| <i>circNEBL</i> | miR-6868-5p         | 1 |
| <i>circNEBL</i> | miR-6878-5p         | 2 |
| <i>circNEBL</i> | miR-6884-3p         | 2 |
| <i>circNEBL</i> | miR-6885-3p         | 1 |
| <i>circNEBL</i> | miR-6888-5p         | 3 |
| <i>circNEBL</i> | miR-6892-5p         | 1 |
| <i>circNEBL</i> | miR-7106-5p         | 1 |
| <i>circNEBL</i> | miR-7114-5p         | 2 |
| <i>circNEBL</i> | miR-7154-5p         | 2 |
| <i>circNEBL</i> | miR-7156-3p         | 2 |
| <i>circNEBL</i> | miR-7158-5p         | 1 |
| <i>circNEBL</i> | miR-7159-5p         | 1 |
| <i>circNEBL</i> | miR-7161-3p         | 3 |
| <i>circNEBL</i> | miR-7162-3p         | 3 |
| <i>circNEBL</i> | miR-744-3p          | 1 |
| <i>circNEBL</i> | miR-758-3p          | 2 |
| <i>circNEBL</i> | miR-766-3p          | 3 |
| <i>circNEBL</i> | miR-767-5p          | 2 |
| <i>circNEBL</i> | miR-770-5p          | 2 |
| <i>circNEBL</i> | miR-7702            | 4 |
| <i>circNEBL</i> | miR-7843-3p         | 1 |
| <i>circNEBL</i> | miR-7850-5p         | 1 |
| <i>circNEBL</i> | miR-7851-3p         | 1 |
| <i>circNEBL</i> | miR-7854-3p         | 1 |
| <i>circNEBL</i> | miR-7855-5p         | 1 |
| <i>circNEBL</i> | miR-7974            | 1 |
| <i>circNEBL</i> | miR-7977            | 2 |
| <i>circNEBL</i> | miR-8055            | 3 |
| <i>circNEBL</i> | miR-8060            | 2 |
| <i>circNEBL</i> | miR-8070            | 1 |
| <i>circNEBL</i> | miR-8080            | 3 |
| <i>circNEBL</i> | miR-8083            | 2 |

|                 |                     |   |
|-----------------|---------------------|---|
| <i>circNEBL</i> | miR-8087            | 3 |
| <i>circNEBL</i> | miR-873-3p          | 1 |
| <i>circNEBL</i> | miR-876-3p          | 1 |
| <i>circNEBL</i> | miR-876-5p          | 5 |
| <i>circNEBL</i> | miR-887-3p          | 1 |
| <i>circNEBL</i> | miR-888-3p          | 1 |
| <i>circNEBL</i> | miR-888-5p          | 1 |
| <i>circNEBL</i> | miR-892-5p          | 2 |
| <i>circNEBL</i> | miR-892b            | 2 |
| <i>circNEBL</i> | miR-92a-1-5p        | 1 |
| <i>circNEBL</i> | miR-944             | 2 |
| <i>circNEBL</i> | miR-95-5p           | 1 |
| <i>circNEBL</i> | miR-9500            | 6 |
| <i>circNEBL</i> | miR-96-3p           | 1 |
| <i>circNEBL</i> | miR-99-3p           | 1 |
| <i>circNEBL</i> | miR-1-5p            | 1 |
| <i>circNEBL</i> | miR-101-3p.2        | 1 |
| <i>circNEBL</i> | miR-101-5p          | 1 |
| <i>circNEBL</i> | miR-103a-2-5p       | 3 |
| <i>circNEBL</i> | miR-106a-3p         | 1 |
| <i>circNEBL</i> | miR-1233-5p/6778-5p | 1 |
| <i>circNEBL</i> | miR-124-3p.2/506-3p | 1 |
| <i>circNEBL</i> | miR-1245a/8079      | 1 |
| <i>circNEBL</i> | miR-1251-5p         | 1 |
| <i>circNEBL</i> | miR-1255b-2-3p      | 2 |
| <i>circNEBL</i> | miR-1256            | 2 |
| <i>circNEBL</i> | miR-1264            | 2 |
| <i>circNEBL</i> | miR-1273d           | 2 |
| <i>circNEBL</i> | miR-1273g-3p        | 2 |
| <i>circNEBL</i> | miR-128-3p          | 2 |
| <i>circNEBL</i> | miR-1286            | 2 |
| <i>circNEBL</i> | miR-1287-3p         | 1 |
| <i>circNEBL</i> | miR-1287-5p         | 1 |
| <i>circNEBL</i> | miR-1288-5p         | 2 |
| <i>circNEBL</i> | miR-1295b-5p/1912   | 2 |
| <i>circNEBL</i> | miR-1296-3p         | 1 |
| <i>circNEBL</i> | miR-132-5p          | 2 |
| <i>circNEBL</i> | miR-135a-3p         | 4 |

|                 |                                     |   |
|-----------------|-------------------------------------|---|
| <i>circNEBL</i> | miR-137                             | 1 |
| <i>circNEBL</i> | miR-142-3p.1                        | 1 |
| <i>circNEBL</i> | miR-145-5p                          | 2 |
| <i>circNEBL</i> | miR-1468-3p                         | 1 |
| <i>circNEBL</i> | miR-147a                            | 1 |
| <i>circNEBL</i> | miR-148-3p/152-3p                   | 1 |
| <i>circNEBL</i> | miR-150-5p                          | 1 |
| <i>circNEBL</i> | miR-151-3p                          | 1 |
| <i>circNEBL</i> | miR-1537-5p                         | 2 |
| <i>circNEBL</i> | miR-1587/3620-5p                    | 2 |
| <i>circNEBL</i> | miR-15b-3p                          | 1 |
| <i>circNEBL</i> | miR-16-1-3p                         | 1 |
| <i>circNEBL</i> | miR-16-2-3p/195-3p                  | 1 |
| <i>circNEBL</i> | miR-181-5p                          | 1 |
| <i>circNEBL</i> | miR-181a-2-3p                       | 1 |
| <i>circNEBL</i> | miR-1825                            | 2 |
| <i>circNEBL</i> | miR-19-5p                           | 1 |
| <i>circNEBL</i> | miR-190a-3p                         | 1 |
| <i>circNEBL</i> | miR-1910-3p/6511a-5p                | 2 |
| <i>circNEBL</i> | miR-1911-3p                         | 1 |
| <i>circNEBL</i> | miR-193-3p                          | 1 |
| <i>circNEBL</i> | miR-194-3p                          | 2 |
| <i>circNEBL</i> | miR-196a-3p                         | 1 |
| <i>circNEBL</i> | miR-199-3p                          | 1 |
| <i>circNEBL</i> | miR-199-5p                          | 2 |
| <i>circNEBL</i> | miR-200ab-5p                        | 1 |
| <i>circNEBL</i> | miR-205-3p                          | 1 |
| <i>circNEBL</i> | miR-2052                            | 1 |
| <i>circNEBL</i> | miR-2054                            | 2 |
| <i>circNEBL</i> | miR-2113                            | 3 |
| <i>circNEBL</i> | miR-2116-3p                         | 1 |
| <i>circNEBL</i> | miR-221-3p/222-3p                   | 1 |
| <i>circNEBL</i> | miR-222-5p                          | 2 |
| <i>circNEBL</i> | miR-223-3p                          | 2 |
| <i>circNEBL</i> | miR-224-5p                          | 3 |
| <i>circNEBL</i> | miR-23-3p                           | 1 |
| <i>circNEBL</i> | miR-2392                            | 1 |
| <i>circNEBL</i> | miR-25-3p/32-5p/92-3p/363-3p/367-3p | 2 |



|                 |                                 |    |
|-----------------|---------------------------------|----|
| <i>circNEBL</i> | miR-27a-5p                      | 1  |
| <i>circNEBL</i> | miR-298                         | 6  |
| <i>circNEBL</i> | miR-29c-5p                      | 1  |
| <i>circNEBL</i> | miR-30-3p                       | 3  |
| <i>circNEBL</i> | miR-302-3p/372-3p/373-3p/520-3p | 2  |
| <i>circNEBL</i> | miR-302a-5p                     | 1  |
| <i>circNEBL</i> | miR-302f                        | 1  |
| <i>circNEBL</i> | miR-3065-3p                     | 1  |
| <i>circNEBL</i> | miR-3115                        | 1  |
| <i>circNEBL</i> | miR-3119                        | 2  |
| <i>circNEBL</i> | miR-3120-3p                     | 1  |
| <i>circNEBL</i> | miR-3121-3p                     | 2  |
| <i>circNEBL</i> | miR-3130-5p/4482-5p             | 2  |
| <i>circNEBL</i> | miR-3135b                       | 1  |
| <i>circNEBL</i> | miR-3140-3p                     | 2  |
| <i>circNEBL</i> | miR-3156-5p                     | 2  |
| <i>circNEBL</i> | miR-3161                        | 2  |
| <i>circNEBL</i> | miR-3162-5p                     | 1  |
| <i>circNEBL</i> | miR-3179                        | 1  |
| <i>circNEBL</i> | miR-3180-5p                     | 2  |
| <i>circNEBL</i> | miR-3184-3p                     | 2  |
| <i>circNEBL</i> | miR-32-3p                       | 1  |
| <i>circNEBL</i> | miR-329-3p/362-3p               | 14 |
| <i>circNEBL</i> | miR-33-5p                       | 1  |
| <i>circNEBL</i> | miR-338-3p                      | 1  |
| <i>circNEBL</i> | miR-34a-3p                      | 1  |
| <i>circNEBL</i> | miR-34b-5p/449c-5p              | 2  |
| <i>circNEBL</i> | miR-3606-5p                     | 2  |
| <i>circNEBL</i> | miR-3614-3p                     | 1  |
| <i>circNEBL</i> | miR-3617-3p                     | 1  |
| <i>circNEBL</i> | miR-3682-3p                     | 1  |
| <i>circNEBL</i> | miR-3684                        | 1  |
| <i>circNEBL</i> | miR-369-3p                      | 1  |
| <i>circNEBL</i> | miR-3692-3p                     | 2  |
| <i>circNEBL</i> | miR-374a-3p                     | 1  |
| <i>circNEBL</i> | miR-382-5p                      | 1  |
| <i>circNEBL</i> | miR-383-3p                      | 1  |
| <i>circNEBL</i> | miR-3907                        | 2  |

|                 |                           |   |
|-----------------|---------------------------|---|
| <i>circNEBL</i> | miR-3908                  | 1 |
| <i>circNEBL</i> | miR-3909                  | 1 |
| <i>circNEBL</i> | miR-3911                  | 2 |
| <i>circNEBL</i> | miR-3924                  | 1 |
| <i>circNEBL</i> | miR-3928-5p/6806-3p       | 2 |
| <i>circNEBL</i> | miR-3940-3p               | 2 |
| <i>circNEBL</i> | miR-3941                  | 2 |
| <i>circNEBL</i> | miR-3942-5p               | 1 |
| <i>circNEBL</i> | miR-3944-5p               | 2 |
| <i>circNEBL</i> | miR-3977                  | 1 |
| <i>circNEBL</i> | miR-411-3p                | 1 |
| <i>circNEBL</i> | miR-4259                  | 1 |
| <i>circNEBL</i> | miR-4269/6715b-5p         | 1 |
| <i>circNEBL</i> | miR-4270/4441/6754-5p     | 1 |
| <i>circNEBL</i> | miR-4271/4725-3p/6780b-5p | 3 |
| <i>circNEBL</i> | miR-4272                  | 2 |
| <i>circNEBL</i> | miR-4276                  | 1 |
| <i>circNEBL</i> | miR-4277                  | 2 |
| <i>circNEBL</i> | miR-4292/6791-5p          | 1 |
| <i>circNEBL</i> | miR-4304                  | 1 |
| <i>circNEBL</i> | miR-4307                  | 3 |
| <i>circNEBL</i> | miR-4308                  | 1 |
| <i>circNEBL</i> | miR-432-3p                | 1 |
| <i>circNEBL</i> | miR-4327                  | 2 |
| <i>circNEBL</i> | miR-4328                  | 2 |
| <i>circNEBL</i> | miR-4423-3p               | 1 |
| <i>circNEBL</i> | miR-4424                  | 1 |
| <i>circNEBL</i> | miR-4433a-3p              | 2 |
| <i>circNEBL</i> | miR-4446-5p               | 3 |
| <i>circNEBL</i> | miR-4453/4538             | 1 |
| <i>circNEBL</i> | miR-4459                  | 2 |
| <i>circNEBL</i> | miR-4477a                 | 1 |
| <i>circNEBL</i> | miR-4503                  | 2 |
| <i>circNEBL</i> | miR-450b-3p/769-3p        | 2 |
| <i>circNEBL</i> | miR-4514/4692             | 1 |
| <i>circNEBL</i> | miR-4528                  | 1 |
| <i>circNEBL</i> | miR-4530                  | 1 |
| <i>circNEBL</i> | miR-4536-3p               | 1 |

|                 |                     |   |
|-----------------|---------------------|---|
| <i>circNEBL</i> | miR-4539            | 2 |
| <i>circNEBL</i> | miR-4645-5p/4673    | 1 |
| <i>circNEBL</i> | miR-4648            | 1 |
| <i>circNEBL</i> | miR-4652-3p         | 2 |
| <i>circNEBL</i> | miR-4654/4769-5p    | 1 |
| <i>circNEBL</i> | miR-466             | 1 |
| <i>circNEBL</i> | miR-4666b           | 1 |
| <i>circNEBL</i> | miR-4672            | 2 |
| <i>circNEBL</i> | miR-4674            | 2 |
| <i>circNEBL</i> | miR-4684-5p         | 3 |
| <i>circNEBL</i> | miR-4685-5p/6837-5p | 1 |
| <i>circNEBL</i> | miR-4691-5p/6792-3p | 1 |
| <i>circNEBL</i> | miR-4695-3p         | 2 |
| <i>circNEBL</i> | miR-4696            | 1 |
| <i>circNEBL</i> | miR-4697-3p         | 2 |
| <i>circNEBL</i> | miR-4698            | 3 |
| <i>circNEBL</i> | miR-4700-3p         | 1 |
| <i>circNEBL</i> | miR-4705            | 1 |
| <i>circNEBL</i> | miR-4707-3p         | 2 |
| <i>circNEBL</i> | miR-4709-5p         | 1 |
| <i>circNEBL</i> | miR-4713-5p         | 1 |
| <i>circNEBL</i> | miR-4715-5p         | 1 |
| <i>circNEBL</i> | miR-4716-5p         | 2 |
| <i>circNEBL</i> | miR-4718            | 2 |
| <i>circNEBL</i> | miR-4719            | 1 |
| <i>circNEBL</i> | miR-4722-5p         | 2 |
| <i>circNEBL</i> | miR-4735-5p         | 2 |
| <i>circNEBL</i> | miR-4742-5p         | 1 |
| <i>circNEBL</i> | miR-4743-3p         | 2 |
| <i>circNEBL</i> | miR-4747-5p/5196-5p | 3 |
| <i>circNEBL</i> | miR-4755-5p/5006-3p | 1 |
| <i>circNEBL</i> | miR-4760-5p/8061    | 1 |
| <i>circNEBL</i> | miR-4768-3p         | 2 |
| <i>circNEBL</i> | miR-4775            | 2 |
| <i>circNEBL</i> | miR-4778-3p         | 1 |
| <i>circNEBL</i> | miR-4797-5p         | 1 |
| <i>circNEBL</i> | miR-4799-5p         | 2 |
| <i>circNEBL</i> | miR-488-3p          | 3 |

|                 |                                               |   |
|-----------------|-----------------------------------------------|---|
| <i>circNEBL</i> | miR-495-5p                                    | 1 |
| <i>circNEBL</i> | miR-4999-5p                                   | 2 |
| <i>circNEBL</i> | miR-5000-3p                                   | 1 |
| <i>circNEBL</i> | miR-5000-5p                                   | 2 |
| <i>circNEBL</i> | miR-5004-3p                                   | 2 |
| <i>circNEBL</i> | miR-500a-5p                                   | 1 |
| <i>circNEBL</i> | miR-500b-3p                                   | 1 |
| <i>circNEBL</i> | miR-5010-3p                                   | 3 |
| <i>circNEBL</i> | miR-5011-3p                                   | 1 |
| <i>circNEBL</i> | miR-5011-5p                                   | 1 |
| <i>circNEBL</i> | miR-505-5p                                    | 3 |
| <i>circNEBL</i> | miR-5089-3p                                   | 1 |
| <i>circNEBL</i> | miR-5089-5p                                   | 2 |
| <i>circNEBL</i> | miR-509-3p                                    | 1 |
| <i>circNEBL</i> | miR-5094                                      | 1 |
| <i>circNEBL</i> | miR-5100                                      | 3 |
| <i>circNEBL</i> | miR-513a-3p/513c-3p/3606-3p                   | 6 |
| <i>circNEBL</i> | miR-513b-5p                                   | 1 |
| <i>circNEBL</i> | miR-515-5p/519e-5p                            | 1 |
| <i>circNEBL</i> | miR-517-5p                                    | 1 |
| <i>circNEBL</i> | miR-519-3p                                    | 2 |
| <i>circNEBL</i> | miR-5190                                      | 2 |
| <i>circNEBL</i> | miR-519d-5p                                   | 2 |
| <i>circNEBL</i> | miR-532-3p                                    | 1 |
| <i>circNEBL</i> | miR-539-3p                                    | 1 |
| <i>circNEBL</i> | miR-545-5p                                    | 1 |
| <i>circNEBL</i> | miR-548aj-5p/548f-5p/548g-5p/548x-5p          | 1 |
| <i>circNEBL</i> | miR-548ap-3p/548aa/548t-3p                    | 1 |
| <i>circNEBL</i> | miR-548as-3p                                  | 1 |
| <i>circNEBL</i> | miR-548ay-3p/548at-3p                         | 1 |
| <i>circNEBL</i> | miR-548az-3p/548ar-3p/548a-3p/548e-3p/548f-3p | 1 |
| <i>circNEBL</i> | miR-548az-5p/548t-5p                          | 5 |
| <i>circNEBL</i> | miR-548n                                      | 5 |
| <i>circNEBL</i> | miR-548v                                      | 1 |
| <i>circNEBL</i> | miR-551b-5p                                   | 2 |
| <i>circNEBL</i> | miR-554                                       | 2 |
| <i>circNEBL</i> | miR-5582-3p                                   | 1 |
| <i>circNEBL</i> | miR-5585-3p                                   | 3 |

|                 |                  |    |
|-----------------|------------------|----|
| <i>circNEBL</i> | miR-5586-5p      | 1  |
| <i>circNEBL</i> | miR-567          | 1  |
| <i>circNEBL</i> | miR-568          | 1  |
| <i>circNEBL</i> | miR-569          | 1  |
| <i>circNEBL</i> | miR-5692bc       | 1  |
| <i>circNEBL</i> | miR-5693         | 2  |
| <i>circNEBL</i> | miR-5695         | 2  |
| <i>circNEBL</i> | miR-576-3p       | 1  |
| <i>circNEBL</i> | miR-580-5p       | 1  |
| <i>circNEBL</i> | miR-582-5p       | 1  |
| <i>circNEBL</i> | miR-586          | 1  |
| <i>circNEBL</i> | miR-589-3p       | 1  |
| <i>circNEBL</i> | miR-591          | 1  |
| <i>circNEBL</i> | miR-592          | 2  |
| <i>circNEBL</i> | miR-593-3p       | 1  |
| <i>circNEBL</i> | miR-595          | 3  |
| <i>circNEBL</i> | miR-598-3p       | 2  |
| <i>circNEBL</i> | miR-599          | 2  |
| <i>circNEBL</i> | miR-603          | 14 |
| <i>circNEBL</i> | miR-6073         | 1  |
| <i>circNEBL</i> | miR-6076/6797-3p | 1  |
| <i>circNEBL</i> | miR-6077         | 5  |
| <i>circNEBL</i> | miR-6079         | 4  |
| <i>circNEBL</i> | miR-6083         | 1  |
| <i>circNEBL</i> | miR-6126         | 4  |
| <i>circNEBL</i> | miR-616-3p       | 1  |
| <i>circNEBL</i> | miR-624-3p       | 2  |
| <i>circNEBL</i> | miR-629-3p       | 1  |
| <i>circNEBL</i> | miR-633          | 2  |
| <i>circNEBL</i> | miR-640          | 1  |
| <i>circNEBL</i> | miR-644a         | 2  |
| <i>circNEBL</i> | miR-647          | 1  |
| <i>circNEBL</i> | miR-6502-3p      | 4  |
| <i>circNEBL</i> | miR-6504-3p      | 1  |
| <i>circNEBL</i> | miR-6507-3p      | 1  |
| <i>circNEBL</i> | miR-6510-3p      | 1  |
| <i>circNEBL</i> | miR-652-5p       | 1  |
| <i>circNEBL</i> | miR-654-3p       | 1  |

|                 |              |   |
|-----------------|--------------|---|
| <i>circNEBL</i> | miR-656-3p   | 2 |
| <i>circNEBL</i> | miR-665      | 1 |
| <i>circNEBL</i> | miR-670-5p   | 3 |
| <i>circNEBL</i> | miR-671-5p   | 2 |
| <i>circNEBL</i> | miR-6716-5p  | 1 |
| <i>circNEBL</i> | miR-6728-5p  | 2 |
| <i>circNEBL</i> | miR-6749-3p  | 1 |
| <i>circNEBL</i> | miR-6753-5p  | 1 |
| <i>circNEBL</i> | miR-6755-3p  | 1 |
| <i>circNEBL</i> | miR-6757-3p  | 1 |
| <i>circNEBL</i> | miR-6767-5p  | 1 |
| <i>circNEBL</i> | miR-6768-5p  | 3 |
| <i>circNEBL</i> | miR-6776-3p  | 1 |
| <i>circNEBL</i> | miR-6780a-3p | 1 |
| <i>circNEBL</i> | miR-6783-5p  | 3 |
| <i>circNEBL</i> | miR-6787-3p  | 1 |
| <i>circNEBL</i> | miR-6792-5p  | 3 |
| <i>circNEBL</i> | miR-6818-3p  | 1 |
| <i>circNEBL</i> | miR-6818-5p  | 1 |
| <i>circNEBL</i> | miR-6820-5p  | 1 |
| <i>circNEBL</i> | miR-6826-5p  | 1 |
| <i>circNEBL</i> | miR-6828-5p  | 2 |
| <i>circNEBL</i> | miR-6830-5p  | 3 |
| <i>circNEBL</i> | miR-6838-3p  | 3 |
| <i>circNEBL</i> | miR-6842-3p  | 1 |
| <i>circNEBL</i> | miR-6854-3p  | 1 |
| <i>circNEBL</i> | miR-6863     | 2 |
| <i>circNEBL</i> | miR-6864-5p  | 4 |
| <i>circNEBL</i> | miR-6867-3p  | 1 |
| <i>circNEBL</i> | miR-6871-5p  | 2 |
| <i>circNEBL</i> | miR-6881-3p  | 1 |
| <i>circNEBL</i> | miR-6886-5p  | 1 |
| <i>circNEBL</i> | miR-6895-3p  | 1 |
| <i>circNEBL</i> | miR-7-5p     | 5 |
| <i>circNEBL</i> | miR-7111-3p  | 1 |
| <i>circNEBL</i> | miR-7113-5p  | 1 |
| <i>circNEBL</i> | miR-7153-3p  | 1 |
| <i>circNEBL</i> | miR-7515     | 1 |

|                 |                         |    |
|-----------------|-------------------------|----|
| <i>circNEBL</i> | miR-7641                | 1  |
| <i>circNEBL</i> | miR-7856-5p             | 1  |
| <i>circNEBL</i> | miR-802                 | 1  |
| <i>circNEBL</i> | miR-8062                | 1  |
| <i>circNEBL</i> | miR-8063                | 3  |
| <i>circNEBL</i> | miR-8065                | 1  |
| <i>circNEBL</i> | miR-8068                | 1  |
| <i>circNEBL</i> | miR-8076                | 1  |
| <i>circNEBL</i> | miR-8485                | 14 |
| <i>circNEBL</i> | miR-873-5p.2            | 2  |
| <i>circNEBL</i> | miR-877-3p              | 1  |
| <i>circNEBL</i> | miR-889-3p              | 3  |
| <i>circNEBL</i> | miR-891b                | 1  |
| <i>circNEBL</i> | miR-921                 | 2  |
| <i>circNEBL</i> | miR-935                 | 2  |
| <i>circNEBL</i> | miR-936                 | 1  |
| <i>circNEBL</i> | miR-940/6808-5p/6893-5p | 2  |
| <i>circNEBL</i> | let-7a-2-3p/let-7g-3p   | 1  |
| <i>circNEBL</i> | let-7c-3p               | 1  |
| <i>circNEBL</i> | miR-1178-5p             | 2  |
| <i>circNEBL</i> | miR-1182                | 2  |
| <i>circNEBL</i> | miR-1202/3972           | 3  |
| <i>circNEBL</i> | miR-1206                | 1  |
| <i>circNEBL</i> | miR-1208                | 1  |
| <i>circNEBL</i> | miR-122-5p              | 1  |
| <i>circNEBL</i> | miR-1226-3p             | 2  |
| <i>circNEBL</i> | miR-1228-3p             | 1  |
| <i>circNEBL</i> | miR-1238-5p/4758-5p     | 1  |
| <i>circNEBL</i> | miR-1244                | 1  |
| <i>circNEBL</i> | miR-125-5p              | 1  |
| <i>circNEBL</i> | miR-1250-5p             | 1  |
| <i>circNEBL</i> | miR-1254/3116           | 1  |
| <i>circNEBL</i> | miR-1266-3p             | 1  |
| <i>circNEBL</i> | miR-1272                | 2  |
| <i>circNEBL</i> | miR-1279                | 1  |
| <i>circNEBL</i> | miR-1283                | 2  |
| <i>circNEBL</i> | miR-1285-5p             | 3  |
| <i>circNEBL</i> | miR-1294                | 1  |

|                 |                   |   |
|-----------------|-------------------|---|
| <i>circNEBL</i> | miR-1296-5p       | 1 |
| <i>circNEBL</i> | miR-1303          | 1 |
| <i>circNEBL</i> | miR-1322          | 2 |
| <i>circNEBL</i> | miR-134-3p        | 1 |
| <i>circNEBL</i> | miR-134-5p        | 1 |
| <i>circNEBL</i> | miR-1468-5p       | 1 |
| <i>circNEBL</i> | miR-154-5p        | 1 |
| <i>circNEBL</i> | miR-155-5p        | 1 |
| <i>circNEBL</i> | miR-186-3p        | 1 |
| <i>circNEBL</i> | miR-1910-5p       | 1 |
| <i>circNEBL</i> | miR-192-5p/215-5p | 1 |
| <i>circNEBL</i> | miR-21-3p/3591-3p | 1 |
| <i>circNEBL</i> | miR-211-3p        | 1 |
| <i>circNEBL</i> | miR-2114-5p       | 1 |
| <i>circNEBL</i> | miR-214-5p        | 1 |
| <i>circNEBL</i> | miR-217           | 2 |
| <i>circNEBL</i> | miR-219a-2-3p     | 1 |
| <i>circNEBL</i> | miR-219b-3p       | 1 |
| <i>circNEBL</i> | miR-2276-3p       | 1 |
| <i>circNEBL</i> | miR-26b-3p        | 1 |
| <i>circNEBL</i> | miR-28-5p/708-5p  | 1 |
| <i>circNEBL</i> | miR-29-3p         | 1 |
| <i>circNEBL</i> | miR-29b-1-5p      | 2 |
| <i>circNEBL</i> | miR-3136-5p/4439  | 1 |
| <i>circNEBL</i> | miR-3146          | 1 |
| <i>circNEBL</i> | miR-3152-3p       | 1 |
| <i>circNEBL</i> | miR-3158-3p       | 2 |
| <i>circNEBL</i> | miR-3160-3p       | 1 |
| <i>circNEBL</i> | miR-3164          | 1 |
| <i>circNEBL</i> | miR-3177-3p       | 1 |
| <i>circNEBL</i> | miR-3177-5p       | 1 |
| <i>circNEBL</i> | miR-326           | 1 |
| <i>circNEBL</i> | miR-329-5p        | 1 |
| <i>circNEBL</i> | miR-331-3p        | 1 |
| <i>circNEBL</i> | miR-337-3p        | 1 |
| <i>circNEBL</i> | miR-339-5p        | 2 |
| <i>circNEBL</i> | miR-342-3p        | 1 |
| <i>circNEBL</i> | miR-345-5p        | 1 |



|                 |                                              |   |
|-----------------|----------------------------------------------|---|
| <i>circNEBL</i> | miR-3614-5p                                  | 1 |
| <i>circNEBL</i> | miR-3622a-5p                                 | 1 |
| <i>circNEBL</i> | miR-3659                                     | 1 |
| <i>circNEBL</i> | miR-3680-3p                                  | 1 |
| <i>circNEBL</i> | miR-3680-5p                                  | 1 |
| <i>circNEBL</i> | miR-3681-5p                                  | 1 |
| <i>circNEBL</i> | miR-377-3p                                   | 1 |
| <i>circNEBL</i> | miR-377-5p/6086                              | 1 |
| <i>circNEBL</i> | miR-383-5p.2                                 | 1 |
| <i>circNEBL</i> | miR-3943                                     | 1 |
| <i>circNEBL</i> | miR-3945                                     | 1 |
| <i>circNEBL</i> | miR-4251                                     | 1 |
| <i>circNEBL</i> | miR-4253/6862-5p                             | 1 |
| <i>circNEBL</i> | miR-4255                                     | 2 |
| <i>circNEBL</i> | miR-4265/4296/4322                           | 1 |
| <i>circNEBL</i> | miR-4278                                     | 2 |
| <i>circNEBL</i> | miR-4280                                     | 1 |
| <i>circNEBL</i> | miR-4281                                     | 2 |
| <i>circNEBL</i> | miR-4291                                     | 1 |
| <i>circNEBL</i> | miR-4293                                     | 3 |
| <i>circNEBL</i> | miR-4302                                     | 1 |
| <i>circNEBL</i> | miR-4313                                     | 1 |
| <i>circNEBL</i> | miR-4316                                     | 1 |
| <i>circNEBL</i> | miR-4318                                     | 1 |
| <i>circNEBL</i> | miR-4320                                     | 1 |
| <i>circNEBL</i> | miR-4323                                     | 1 |
| <i>circNEBL</i> | miR-4324                                     | 1 |
| <i>circNEBL</i> | miR-4325                                     | 1 |
| <i>circNEBL</i> | miR-4329                                     | 1 |
| <i>circNEBL</i> | miR-4417                                     | 1 |
| <i>circNEBL</i> | miR-4433b-3p                                 | 1 |
| <i>circNEBL</i> | miR-4436b-3p/4632-5p/6735-5p/6879-5p/7843-5p | 1 |
| <i>circNEBL</i> | miR-4436b-5p                                 | 1 |
| <i>circNEBL</i> | miR-4443                                     | 1 |
| <i>circNEBL</i> | miR-4446-3p                                  | 2 |
| <i>circNEBL</i> | miR-4454                                     | 1 |
| <i>circNEBL</i> | miR-4474-3p                                  | 1 |
| <i>circNEBL</i> | miR-4482-3p                                  | 1 |

|                 |                       |   |
|-----------------|-----------------------|---|
| <i>circNEBL</i> | miR-4487              | 1 |
| <i>circNEBL</i> | miR-4490              | 1 |
| <i>circNEBL</i> | miR-4502              | 1 |
| <i>circNEBL</i> | miR-450b-5p           | 1 |
| <i>circNEBL</i> | miR-4511              | 1 |
| <i>circNEBL</i> | miR-4521              | 1 |
| <i>circNEBL</i> | miR-455-3p.1          | 1 |
| <i>circNEBL</i> | miR-4633-5p           | 1 |
| <i>circNEBL</i> | miR-4645-3p           | 2 |
| <i>circNEBL</i> | miR-4656              | 1 |
| <i>circNEBL</i> | miR-4658/6790-5p      | 1 |
| <i>circNEBL</i> | miR-4659a-5p/4659b-5p | 1 |
| <i>circNEBL</i> | miR-4662a-3p          | 3 |
| <i>circNEBL</i> | miR-4663              | 2 |
| <i>circNEBL</i> | miR-4668-3p           | 1 |
| <i>circNEBL</i> | miR-4675/4741         | 1 |
| <i>circNEBL</i> | miR-4682              | 1 |
| <i>circNEBL</i> | miR-4708-3p           | 1 |
| <i>circNEBL</i> | miR-4713-3p           | 1 |
| <i>circNEBL</i> | miR-4715-3p           | 1 |
| <i>circNEBL</i> | miR-4717-3p           | 2 |
| <i>circNEBL</i> | miR-4717-5p           | 1 |
| <i>circNEBL</i> | miR-4720-3p           | 1 |
| <i>circNEBL</i> | miR-4727-5p           | 1 |
| <i>circNEBL</i> | miR-4732-3p           | 1 |
| <i>circNEBL</i> | miR-4733-3p           | 2 |
| <i>circNEBL</i> | miR-4742-3p           | 2 |
| <i>circNEBL</i> | miR-4750-3p           | 1 |
| <i>circNEBL</i> | miR-4761-3p           | 2 |
| <i>circNEBL</i> | miR-4768-5p/6833-3p   | 1 |
| <i>circNEBL</i> | miR-4769-3p/6817-5p   | 3 |
| <i>circNEBL</i> | miR-4772-3p           | 1 |
| <i>circNEBL</i> | miR-4773              | 1 |
| <i>circNEBL</i> | miR-4774-5p           | 1 |
| <i>circNEBL</i> | miR-4795-5p           | 1 |
| <i>circNEBL</i> | miR-4798-3p           | 1 |
| <i>circNEBL</i> | miR-4800-3p           | 1 |
| <i>circNEBL</i> | miR-4802-5p           | 1 |

|                 |                          |   |
|-----------------|--------------------------|---|
| <i>circNEBL</i> | miR-4803                 | 1 |
| <i>circNEBL</i> | miR-4804-3p              | 1 |
| <i>circNEBL</i> | miR-486-5p               | 2 |
| <i>circNEBL</i> | miR-491-3p               | 2 |
| <i>circNEBL</i> | miR-493-5p               | 1 |
| <i>circNEBL</i> | miR-5001-3p              | 1 |
| <i>circNEBL</i> | miR-5006-5p              | 3 |
| <i>circNEBL</i> | miR-5007-5p              | 1 |
| <i>circNEBL</i> | miR-5008-5p              | 1 |
| <i>circNEBL</i> | miR-501-3p/502-3p        | 1 |
| <i>circNEBL</i> | miR-507/557              | 1 |
| <i>circNEBL</i> | miR-5088-5p              | 2 |
| <i>circNEBL</i> | miR-509-3-5p/509-5p/4418 | 2 |
| <i>circNEBL</i> | miR-5093                 | 1 |
| <i>circNEBL</i> | miR-513c-5p/514b-5p      | 3 |
| <i>circNEBL</i> | miR-514a-3p              | 1 |
| <i>circNEBL</i> | miR-518c-5p              | 1 |
| <i>circNEBL</i> | miR-520f-5p              | 2 |
| <i>circNEBL</i> | miR-544a                 | 1 |
| <i>circNEBL</i> | miR-544b                 | 1 |
| <i>circNEBL</i> | miR-548av-3p             | 2 |
| <i>circNEBL</i> | miR-548b-3p              | 1 |
| <i>circNEBL</i> | miR-556-3p               | 1 |
| <i>circNEBL</i> | miR-5571-5p              | 2 |
| <i>circNEBL</i> | miR-558                  | 1 |
| <i>circNEBL</i> | miR-5580-3p              | 1 |
| <i>circNEBL</i> | miR-5582-5p              | 1 |
| <i>circNEBL</i> | miR-5586-3p              | 1 |
| <i>circNEBL</i> | miR-5588-3p              | 1 |
| <i>circNEBL</i> | miR-5590-5p              | 1 |
| <i>circNEBL</i> | miR-561-5p               | 1 |
| <i>circNEBL</i> | miR-5680                 | 1 |
| <i>circNEBL</i> | miR-5691                 | 1 |
| <i>circNEBL</i> | miR-5694                 | 1 |
| <i>circNEBL</i> | miR-574-5p               | 1 |
| <i>circNEBL</i> | miR-581                  | 1 |
| <i>circNEBL</i> | miR-593-5p               | 1 |
| <i>circNEBL</i> | miR-596                  | 3 |

|                 |                     |   |
|-----------------|---------------------|---|
| <i>circNEBL</i> | miR-600             | 1 |
| <i>circNEBL</i> | miR-6089            | 1 |
| <i>circNEBL</i> | miR-635/6774-5p     | 1 |
| <i>circNEBL</i> | miR-638             | 1 |
| <i>circNEBL</i> | miR-648             | 1 |
| <i>circNEBL</i> | miR-6500-3p         | 1 |
| <i>circNEBL</i> | miR-6501-3p         | 1 |
| <i>circNEBL</i> | miR-6505-5p         | 1 |
| <i>circNEBL</i> | miR-6509-3p         | 1 |
| <i>circNEBL</i> | miR-6512-5p         | 1 |
| <i>circNEBL</i> | miR-6514-5p         | 1 |
| <i>circNEBL</i> | miR-6515-5p         | 1 |
| <i>circNEBL</i> | miR-6516-5p         | 2 |
| <i>circNEBL</i> | miR-655-5p          | 1 |
| <i>circNEBL</i> | miR-661             | 1 |
| <i>circNEBL</i> | miR-663b            | 2 |
| <i>circNEBL</i> | miR-664b-5p         | 1 |
| <i>circNEBL</i> | miR-6733-3p         | 1 |
| <i>circNEBL</i> | miR-6736-3p         | 1 |
| <i>circNEBL</i> | miR-6738-3p         | 1 |
| <i>circNEBL</i> | miR-6740-3p         | 1 |
| <i>circNEBL</i> | miR-6758-3p         | 1 |
| <i>circNEBL</i> | miR-6759-3p         | 1 |
| <i>circNEBL</i> | miR-6759-5p         | 1 |
| <i>circNEBL</i> | miR-6760-3p         | 1 |
| <i>circNEBL</i> | miR-6761-5p         | 1 |
| <i>circNEBL</i> | miR-6764-3p/6824-3p | 1 |
| <i>circNEBL</i> | miR-6769a-3p        | 1 |
| <i>circNEBL</i> | miR-6782-3p         | 1 |
| <i>circNEBL</i> | miR-6786-3p         | 1 |
| <i>circNEBL</i> | miR-6789-5p         | 2 |
| <i>circNEBL</i> | miR-6790-3p         | 1 |
| <i>circNEBL</i> | miR-6794-3p         | 1 |
| <i>circNEBL</i> | miR-6796-5p         | 1 |
| <i>circNEBL</i> | miR-6800-3p         | 1 |
| <i>circNEBL</i> | miR-6801-3p/6810-3p | 1 |
| <i>circNEBL</i> | miR-6804-5p         | 2 |
| <i>circNEBL</i> | miR-6808-3p         | 1 |

|                 |                           |   |
|-----------------|---------------------------|---|
| <i>circNEBL</i> | miR-6809-3p               | 1 |
| <i>circNEBL</i> | miR-6811-3p               | 1 |
| <i>circNEBL</i> | miR-6821-3p               | 1 |
| <i>circNEBL</i> | miR-6824-5p               | 2 |
| <i>circNEBL</i> | miR-6829-5p               | 1 |
| <i>circNEBL</i> | miR-6853-3p               | 1 |
| <i>circNEBL</i> | miR-6869-5p               | 2 |
| <i>circNEBL</i> | miR-6871-3p               | 1 |
| <i>circNEBL</i> | miR-6878-3p               | 2 |
| <i>circNEBL</i> | miR-6882-3p               | 2 |
| <i>circNEBL</i> | miR-6883-3p               | 1 |
| <i>circNEBL</i> | miR-6890-3p               | 1 |
| <i>circNEBL</i> | miR-7108-5p               | 1 |
| <i>circNEBL</i> | miR-7109-3p               | 2 |
| <i>circNEBL</i> | miR-7159-3p               | 1 |
| <i>circNEBL</i> | miR-7160-5p               | 2 |
| <i>circNEBL</i> | miR-759                   | 2 |
| <i>circNEBL</i> | miR-762/4492/4498/5001-5p | 1 |
| <i>circNEBL</i> | miR-7703                  | 1 |
| <i>circNEBL</i> | miR-7846-3p               | 1 |
| <i>circNEBL</i> | miR-7849-3p               | 1 |
| <i>circNEBL</i> | miR-8066                  | 1 |
| <i>circNEBL</i> | miR-8077                  | 2 |
| <i>circNEBL</i> | miR-8081                  | 1 |
| <i>circNEBL</i> | miR-875-3p                | 1 |
| <i>circNEBL</i> | miR-885-5p                | 1 |
| <i>circNEBL</i> | miR-892a                  | 1 |
| <i>circNEBL</i> | miR-9-3p                  | 1 |
| <i>circNEBL</i> | miR-942-5p                | 1 |
| <i>circNEBL</i> | miR-943                   | 1 |
| <i>circNEBL</i> | miR-105-5p                | 1 |
| <i>circNEBL</i> | miR-124-5p                | 1 |
| <i>circNEBL</i> | miR-1251-3p               | 1 |
| <i>circNEBL</i> | miR-135-5p                | 1 |
| <i>circNEBL</i> | miR-146a-3p               | 1 |
| <i>circNEBL</i> | miR-188-5p                | 1 |
| <i>circNEBL</i> | miR-204-5p/211-5p         | 1 |
| <i>circNEBL</i> | miR-205-5p                | 1 |

|                 |                    |   |
|-----------------|--------------------|---|
| <i>circNEBL</i> | miR-21-5p/590-5p   | 1 |
| <i>circNEBL</i> | miR-29a-5p         | 1 |
| <i>circNEBL</i> | miR-29b-2-5p       | 1 |
| <i>circNEBL</i> | miR-3121-5p        | 1 |
| <i>circNEBL</i> | miR-3151-3p        | 1 |
| <i>circNEBL</i> | miR-3192-3p        | 2 |
| <i>circNEBL</i> | miR-3611           | 1 |
| <i>circNEBL</i> | miR-3616-3p        | 1 |
| <i>circNEBL</i> | miR-376-3p         | 1 |
| <i>circNEBL</i> | miR-3920           | 1 |
| <i>circNEBL</i> | miR-4297/5581-5p   | 1 |
| <i>circNEBL</i> | miR-4317           | 1 |
| <i>circNEBL</i> | miR-4477b          | 1 |
| <i>circNEBL</i> | miR-452-3p         | 1 |
| <i>circNEBL</i> | miR-4643           | 1 |
| <i>circNEBL</i> | miR-4661-3p        | 1 |
| <i>circNEBL</i> | miR-4677-3p        | 1 |
| <i>circNEBL</i> | miR-4679           | 1 |
| <i>circNEBL</i> | miR-4694-5p        | 1 |
| <i>circNEBL</i> | miR-4721           | 1 |
| <i>circNEBL</i> | miR-4777-5p        | 1 |
| <i>circNEBL</i> | miR-4789-3p        | 1 |
| <i>circNEBL</i> | miR-518d-5p/519-5p | 1 |
| <i>circNEBL</i> | miR-5571-3p        | 1 |
| <i>circNEBL</i> | miR-6080           | 1 |
| <i>circNEBL</i> | miR-623            | 1 |
| <i>circNEBL</i> | miR-642-3p         | 1 |
| <i>circNEBL</i> | miR-6508-5p/8067   | 1 |
| <i>circNEBL</i> | miR-6509-5p        | 1 |
| <i>circNEBL</i> | miR-659-3p         | 1 |
| <i>circNEBL</i> | miR-6740-5p        | 1 |
| <i>circNEBL</i> | miR-6767-3p        | 1 |
| <i>circNEBL</i> | miR-6800-5p        | 1 |
| <i>circNEBL</i> | miR-6802-5p        | 1 |
| <i>circNEBL</i> | miR-6832-3p        | 1 |
| <i>circNEBL</i> | miR-6873-5p        | 1 |
| <i>circNEBL</i> | miR-7975           | 1 |
| <i>circNEBL</i> | miR-889-5p         | 1 |

|                 |                                     |   |
|-----------------|-------------------------------------|---|
| <i>circNEBL</i> | miR-9-5p                            | 1 |
| <i>circNEBL</i> | miR-942-3p                          | 1 |
| <i>circNOL4</i> | miR-105-3p                          | 1 |
| <i>circNOL4</i> | miR-1178-3p                         | 2 |
| <i>circNOL4</i> | miR-1184                            | 3 |
| <i>circNOL4</i> | miR-1202/3972                       | 1 |
| <i>circNOL4</i> | miR-1205                            | 3 |
| <i>circNOL4</i> | miR-1207-3p                         | 4 |
| <i>circNOL4</i> | miR-1227-3p                         | 1 |
| <i>circNOL4</i> | miR-1236-5p                         | 1 |
| <i>circNOL4</i> | miR-1238-5p/4758-5p                 | 1 |
| <i>circNOL4</i> | miR-1245a/8079                      | 2 |
| <i>circNOL4</i> | miR-1245b-3p                        | 1 |
| <i>circNOL4</i> | miR-1253                            | 3 |
| <i>circNOL4</i> | miR-1255a/1255b-5p                  | 1 |
| <i>circNOL4</i> | miR-1260a/1260b                     | 4 |
| <i>circNOL4</i> | miR-1265                            | 2 |
| <i>circNOL4</i> | miR-127-5p                          | 3 |
| <i>circNOL4</i> | miR-1273d                           | 1 |
| <i>circNOL4</i> | miR-1283                            | 3 |
| <i>circNOL4</i> | miR-1295b-5p/1912                   | 1 |
| <i>circNOL4</i> | miR-1301-3p                         | 3 |
| <i>circNOL4</i> | miR-146a-3p                         | 1 |
| <i>circNOL4</i> | miR-148a-5p                         | 1 |
| <i>circNOL4</i> | miR-150-5p                          | 5 |
| <i>circNOL4</i> | miR-155-3p                          | 2 |
| <i>circNOL4</i> | miR-17-3p                           | 3 |
| <i>circNOL4</i> | miR-17-5p/20-5p/93-5p/106-5p/519-3p | 1 |
| <i>circNOL4</i> | miR-183-3p                          | 1 |
| <i>circNOL4</i> | miR-186-5p                          | 2 |
| <i>circNOL4</i> | miR-188-3p                          | 4 |
| <i>circNOL4</i> | miR-1909-5p                         | 1 |
| <i>circNOL4</i> | miR-192-3p                          | 3 |
| <i>circNOL4</i> | miR-200ab-5p                        | 1 |
| <i>circNOL4</i> | miR-202-5p                          | 2 |
| <i>circNOL4</i> | miR-203b-3p                         | 1 |
| <i>circNOL4</i> | miR-205-3p                          | 2 |
| <i>circNOL4</i> | miR-211-3p                          | 1 |

|                 |                           |   |
|-----------------|---------------------------|---|
| <i>circNOL4</i> | miR-2114-5p               | 1 |
| <i>circNOL4</i> | miR-2116-3p               | 5 |
| <i>circNOL4</i> | miR-219b-5p               | 1 |
| <i>circNOL4</i> | miR-22-3p                 | 7 |
| <i>circNOL4</i> | miR-2355-5p               | 1 |
| <i>circNOL4</i> | miR-27-3p                 | 3 |
| <i>circNOL4</i> | miR-30-3p                 | 2 |
| <i>circNOL4</i> | miR-301a-5p/301b-5p       | 1 |
| <i>circNOL4</i> | miR-31-3p                 | 2 |
| <i>circNOL4</i> | miR-3120-3p               | 3 |
| <i>circNOL4</i> | miR-3123                  | 2 |
| <i>circNOL4</i> | miR-3130-5p/4482-5p       | 1 |
| <i>circNOL4</i> | miR-3133                  | 2 |
| <i>circNOL4</i> | miR-3148                  | 5 |
| <i>circNOL4</i> | miR-3150a-5p/3150b-5p     | 4 |
| <i>circNOL4</i> | miR-3151-3p               | 1 |
| <i>circNOL4</i> | miR-3156-3p               | 4 |
| <i>circNOL4</i> | miR-3158-5p               | 3 |
| <i>circNOL4</i> | miR-3160-3p               | 1 |
| <i>circNOL4</i> | miR-3185                  | 1 |
| <i>circNOL4</i> | miR-3187-3p               | 1 |
| <i>circNOL4</i> | miR-3192-3p               | 1 |
| <i>circNOL4</i> | miR-3194-5p               | 1 |
| <i>circNOL4</i> | miR-320e                  | 3 |
| <i>circNOL4</i> | miR-33-5p                 | 1 |
| <i>circNOL4</i> | miR-335-5p                | 2 |
| <i>circNOL4</i> | miR-338-3p                | 5 |
| <i>circNOL4</i> | miR-33b-3p/515-3p/519e-3p | 1 |
| <i>circNOL4</i> | miR-342-3p                | 3 |
| <i>circNOL4</i> | miR-3529-3p               | 3 |
| <i>circNOL4</i> | miR-3611                  | 2 |
| <i>circNOL4</i> | miR-3620-3p               | 2 |
| <i>circNOL4</i> | miR-3664-5p               | 1 |
| <i>circNOL4</i> | miR-3667-3p               | 2 |
| <i>circNOL4</i> | miR-3680-5p               | 3 |
| <i>circNOL4</i> | miR-3685                  | 2 |
| <i>circNOL4</i> | miR-3688-3p               | 5 |
| <i>circNOL4</i> | miR-371a-3p               | 1 |



|                 |                     |   |
|-----------------|---------------------|---|
| <i>circNOL4</i> | miR-371b-3p         | 1 |
| <i>circNOL4</i> | miR-374-5p          | 1 |
| <i>circNOL4</i> | miR-374c-3p         | 1 |
| <i>circNOL4</i> | miR-384             | 2 |
| <i>circNOL4</i> | miR-3908            | 1 |
| <i>circNOL4</i> | miR-3919            | 2 |
| <i>circNOL4</i> | miR-3921/4653-5p    | 1 |
| <i>circNOL4</i> | miR-3925-5p         | 2 |
| <i>circNOL4</i> | miR-3928-5p/6806-3p | 4 |
| <i>circNOL4</i> | miR-3934-3p         | 1 |
| <i>circNOL4</i> | miR-3942-3p         | 2 |
| <i>circNOL4</i> | miR-3942-5p         | 1 |
| <i>circNOL4</i> | miR-3973            | 2 |
| <i>circNOL4</i> | miR-3978            | 5 |
| <i>circNOL4</i> | miR-410-3p          | 2 |
| <i>circNOL4</i> | miR-421             | 1 |
| <i>circNOL4</i> | miR-425-5p          | 1 |
| <i>circNOL4</i> | miR-4263            | 1 |
| <i>circNOL4</i> | miR-4272            | 1 |
| <i>circNOL4</i> | miR-4275            | 3 |
| <i>circNOL4</i> | miR-4297/5581-5p    | 2 |
| <i>circNOL4</i> | miR-4301            | 4 |
| <i>circNOL4</i> | miR-4310/7157-5p    | 4 |
| <i>circNOL4</i> | miR-4330            | 1 |
| <i>circNOL4</i> | miR-4426/4647/4662b | 1 |
| <i>circNOL4</i> | miR-4435            | 1 |
| <i>circNOL4</i> | miR-4452            | 1 |
| <i>circNOL4</i> | miR-4462            | 1 |
| <i>circNOL4</i> | miR-4487            | 1 |
| <i>circNOL4</i> | miR-4504            | 1 |
| <i>circNOL4</i> | miR-4530            | 5 |
| <i>circNOL4</i> | miR-4633-5p         | 2 |
| <i>circNOL4</i> | miR-4635            | 1 |
| <i>circNOL4</i> | miR-4639-5p         | 3 |
| <i>circNOL4</i> | miR-4643            | 4 |
| <i>circNOL4</i> | miR-4658/6790-5p    | 1 |
| <i>circNOL4</i> | miR-4660            | 3 |
| <i>circNOL4</i> | miR-4662a-3p        | 1 |

|                 |                            |   |
|-----------------|----------------------------|---|
| <i>circNOL4</i> | miR-4666a-5p               | 3 |
| <i>circNOL4</i> | miR-4677-3p                | 1 |
| <i>circNOL4</i> | miR-4679                   | 1 |
| <i>circNOL4</i> | miR-4680-5p                | 1 |
| <i>circNOL4</i> | miR-4696                   | 2 |
| <i>circNOL4</i> | miR-4708-3p                | 1 |
| <i>circNOL4</i> | miR-4709-3p                | 2 |
| <i>circNOL4</i> | miR-4712-3p                | 2 |
| <i>circNOL4</i> | miR-4714-5p                | 1 |
| <i>circNOL4</i> | miR-4717-3p                | 3 |
| <i>circNOL4</i> | miR-4729                   | 1 |
| <i>circNOL4</i> | miR-4746-3p                | 1 |
| <i>circNOL4</i> | miR-4756-3p                | 2 |
| <i>circNOL4</i> | miR-4764-5p                | 1 |
| <i>circNOL4</i> | miR-4765                   | 1 |
| <i>circNOL4</i> | miR-4789-3p                | 4 |
| <i>circNOL4</i> | miR-4798-3p                | 3 |
| <i>circNOL4</i> | miR-488-3p                 | 1 |
| <i>circNOL4</i> | miR-488-5p                 | 1 |
| <i>circNOL4</i> | miR-489-3p                 | 2 |
| <i>circNOL4</i> | miR-494-3p                 | 4 |
| <i>circNOL4</i> | miR-5000-5p                | 1 |
| <i>circNOL4</i> | miR-5006-5p                | 1 |
| <i>circNOL4</i> | miR-505-3p.2               | 1 |
| <i>circNOL4</i> | miR-513a-5p                | 3 |
| <i>circNOL4</i> | miR-514a-3p                | 2 |
| <i>circNOL4</i> | miR-514a-5p                | 1 |
| <i>circNOL4</i> | miR-5186                   | 1 |
| <i>circNOL4</i> | miR-518a-5p/527            | 1 |
| <i>circNOL4</i> | miR-519d-5p                | 1 |
| <i>circNOL4</i> | miR-520g-3p                | 2 |
| <i>circNOL4</i> | miR-526b-5p                | 1 |
| <i>circNOL4</i> | miR-532-3p                 | 5 |
| <i>circNOL4</i> | miR-532-5p                 | 2 |
| <i>circNOL4</i> | miR-542-3p                 | 1 |
| <i>circNOL4</i> | miR-545-3p                 | 1 |
| <i>circNOL4</i> | miR-548ah-5p/3609          | 1 |
| <i>circNOL4</i> | miR-548ap-3p/548aa/548t-3p | 4 |

|                 |                       |   |
|-----------------|-----------------------|---|
| <i>circNOL4</i> | miR-548as-3p          | 4 |
| <i>circNOL4</i> | miR-548at-5p          | 2 |
| <i>circNOL4</i> | miR-548aw             | 1 |
| <i>circNOL4</i> | miR-548ay-3p/548at-3p | 4 |
| <i>circNOL4</i> | miR-548s              | 1 |
| <i>circNOL4</i> | miR-556-5p            | 1 |
| <i>circNOL4</i> | miR-558               | 1 |
| <i>circNOL4</i> | miR-5585-3p           | 1 |
| <i>circNOL4</i> | miR-5586-3p           | 1 |
| <i>circNOL4</i> | miR-5588-3p           | 1 |
| <i>circNOL4</i> | miR-561-3p            | 2 |
| <i>circNOL4</i> | miR-5695              | 1 |
| <i>circNOL4</i> | miR-570-3p            | 4 |
| <i>circNOL4</i> | miR-5700              | 2 |
| <i>circNOL4</i> | miR-576-5p            | 1 |
| <i>circNOL4</i> | miR-586               | 2 |
| <i>circNOL4</i> | miR-588               | 1 |
| <i>circNOL4</i> | miR-598-5p            | 1 |
| <i>circNOL4</i> | miR-602               | 1 |
| <i>circNOL4</i> | miR-6076/6797-3p      | 4 |
| <i>circNOL4</i> | miR-610               | 2 |
| <i>circNOL4</i> | miR-6124              | 5 |
| <i>circNOL4</i> | miR-618               | 1 |
| <i>circNOL4</i> | miR-634               | 4 |
| <i>circNOL4</i> | miR-6507-3p           | 1 |
| <i>circNOL4</i> | miR-6507-5p           | 2 |
| <i>circNOL4</i> | miR-653-5p            | 3 |
| <i>circNOL4</i> | miR-6734-3p           | 2 |
| <i>circNOL4</i> | miR-6744-5p           | 1 |
| <i>circNOL4</i> | miR-6750-3p           | 3 |
| <i>circNOL4</i> | miR-6758-5p/6856-5p   | 2 |
| <i>circNOL4</i> | miR-676-5p            | 2 |
| <i>circNOL4</i> | miR-6770-5p           | 3 |
| <i>circNOL4</i> | miR-6771-3p           | 1 |
| <i>circNOL4</i> | miR-6826-5p           | 1 |
| <i>circNOL4</i> | miR-6830-5p           | 1 |
| <i>circNOL4</i> | miR-6878-3p           | 3 |
| <i>circNOL4</i> | miR-7153-3p           | 3 |

|                 |                                       |   |
|-----------------|---------------------------------------|---|
| <i>circNOL4</i> | miR-7156-3p                           | 3 |
| <i>circNOL4</i> | miR-7158-3p                           | 1 |
| <i>circNOL4</i> | miR-7159-5p                           | 1 |
| <i>circNOL4</i> | miR-759                               | 1 |
| <i>circNOL4</i> | miR-7641                              | 1 |
| <i>circNOL4</i> | miR-767-3p                            | 1 |
| <i>circNOL4</i> | miR-7706                              | 2 |
| <i>circNOL4</i> | miR-7843-3p                           | 3 |
| <i>circNOL4</i> | miR-7855-5p                           | 4 |
| <i>circNOL4</i> | miR-7973                              | 4 |
| <i>circNOL4</i> | miR-8060                              | 7 |
| <i>circNOL4</i> | miR-8062                              | 2 |
| <i>circNOL4</i> | miR-9-5p                              | 4 |
| <i>circNOL4</i> | miR-95-5p                             | 1 |
| <i>circNOL4</i> | let-7a-3p/let-7b-3p/let-7f-1-3p/98-3p | 1 |
| <i>circNOL4</i> | let-7f-2-3p/1185-3p                   | 1 |
| <i>circNOL4</i> | miR-1-5p                              | 1 |
| <i>circNOL4</i> | miR-105-5p                            | 1 |
| <i>circNOL4</i> | miR-10a-3p                            | 1 |
| <i>circNOL4</i> | miR-1236-3p                           | 1 |
| <i>circNOL4</i> | miR-126-5p                            | 1 |
| <i>circNOL4</i> | miR-1270                              | 1 |
| <i>circNOL4</i> | miR-1273g-5p                          | 1 |
| <i>circNOL4</i> | miR-1277-5p                           | 1 |
| <i>circNOL4</i> | miR-1279                              | 1 |
| <i>circNOL4</i> | miR-128-1-5p                          | 1 |
| <i>circNOL4</i> | miR-1287-5p                           | 1 |
| <i>circNOL4</i> | miR-1288-5p                           | 1 |
| <i>circNOL4</i> | miR-1305                              | 1 |
| <i>circNOL4</i> | miR-140-5p                            | 1 |
| <i>circNOL4</i> | miR-146-5p                            | 1 |
| <i>circNOL4</i> | miR-147a                              | 1 |
| <i>circNOL4</i> | miR-154-3p/487-3p                     | 2 |
| <i>circNOL4</i> | miR-197-5p/3132                       | 2 |
| <i>circNOL4</i> | miR-203a-3p.1                         | 1 |
| <i>circNOL4</i> | miR-203a-5p                           | 1 |
| <i>circNOL4</i> | miR-296-5p                            | 1 |
| <i>circNOL4</i> | miR-299-3p                            | 1 |

|                 |                           |   |
|-----------------|---------------------------|---|
| <i>circNOL4</i> | miR-3134                  | 1 |
| <i>circNOL4</i> | miR-3135b                 | 1 |
| <i>circNOL4</i> | miR-3136-3p/7155-3p       | 1 |
| <i>circNOL4</i> | miR-3153/6733-5p/6739-5p  | 1 |
| <i>circNOL4</i> | miR-3190-3p               | 1 |
| <i>circNOL4</i> | miR-323-3p                | 1 |
| <i>circNOL4</i> | miR-329-5p                | 1 |
| <i>circNOL4</i> | miR-340-5p                | 1 |
| <i>circNOL4</i> | miR-3607-5p               | 1 |
| <i>circNOL4</i> | miR-3662                  | 1 |
| <i>circNOL4</i> | miR-3671                  | 1 |
| <i>circNOL4</i> | miR-3692-3p               | 1 |
| <i>circNOL4</i> | miR-371-5p                | 1 |
| <i>circNOL4</i> | miR-371b-5p/373-5p/616-5p | 1 |
| <i>circNOL4</i> | miR-372-5p                | 1 |
| <i>circNOL4</i> | miR-377-5p/6086           | 1 |
| <i>circNOL4</i> | miR-378-3p                | 1 |
| <i>circNOL4</i> | miR-379-5p                | 1 |
| <i>circNOL4</i> | miR-380-5p/563            | 1 |
| <i>circNOL4</i> | miR-383-5p.2              | 1 |
| <i>circNOL4</i> | miR-3926                  | 1 |
| <i>circNOL4</i> | miR-3935                  | 1 |
| <i>circNOL4</i> | miR-3941                  | 1 |
| <i>circNOL4</i> | miR-4261                  | 2 |
| <i>circNOL4</i> | miR-4278                  | 1 |
| <i>circNOL4</i> | miR-4434/4516/5703        | 1 |
| <i>circNOL4</i> | miR-4451                  | 1 |
| <i>circNOL4</i> | miR-4464/4748             | 1 |
| <i>circNOL4</i> | miR-4475                  | 1 |
| <i>circNOL4</i> | miR-4476/6876-5p          | 1 |
| <i>circNOL4</i> | miR-4491/4657             | 1 |
| <i>circNOL4</i> | miR-4496                  | 1 |
| <i>circNOL4</i> | miR-4508                  | 1 |
| <i>circNOL4</i> | miR-4512                  | 1 |
| <i>circNOL4</i> | miR-4520-3p               | 1 |
| <i>circNOL4</i> | miR-4524b-3p              | 1 |
| <i>circNOL4</i> | miR-4528                  | 1 |
| <i>circNOL4</i> | miR-4531                  | 1 |

|                 |                  |   |
|-----------------|------------------|---|
| <i>circNOL4</i> | miR-4534/8082    | 1 |
| <i>circNOL4</i> | miR-4638-3p      | 1 |
| <i>circNOL4</i> | miR-4640-5p      | 1 |
| <i>circNOL4</i> | miR-4650-3p      | 1 |
| <i>circNOL4</i> | miR-466          | 1 |
| <i>circNOL4</i> | miR-4666b        | 1 |
| <i>circNOL4</i> | miR-4668-3p      | 1 |
| <i>circNOL4</i> | miR-4668-5p      | 1 |
| <i>circNOL4</i> | miR-4672         | 1 |
| <i>circNOL4</i> | miR-4694-3p      | 1 |
| <i>circNOL4</i> | miR-4699-5p      | 1 |
| <i>circNOL4</i> | miR-4700-3p      | 2 |
| <i>circNOL4</i> | miR-4752         | 1 |
| <i>circNOL4</i> | miR-4773         | 1 |
| <i>circNOL4</i> | miR-4789-5p      | 1 |
| <i>circNOL4</i> | miR-4802-5p      | 1 |
| <i>circNOL4</i> | miR-483-3p.2     | 1 |
| <i>circNOL4</i> | miR-495-3p       | 1 |
| <i>circNOL4</i> | miR-5007-3p      | 1 |
| <i>circNOL4</i> | miR-5011-3p      | 1 |
| <i>circNOL4</i> | miR-5090/6775-5p | 1 |
| <i>circNOL4</i> | miR-5093         | 1 |
| <i>circNOL4</i> | miR-5095/7151-3p | 1 |
| <i>circNOL4</i> | miR-511-3p       | 1 |
| <i>circNOL4</i> | miR-522-3p       | 1 |
| <i>circNOL4</i> | miR-548c-3p      | 2 |
| <i>circNOL4</i> | miR-551b-5p      | 1 |
| <i>circNOL4</i> | miR-553          | 1 |
| <i>circNOL4</i> | miR-556-3p       | 1 |
| <i>circNOL4</i> | miR-5584-5p      | 1 |
| <i>circNOL4</i> | miR-5683         | 1 |
| <i>circNOL4</i> | miR-5694         | 1 |
| <i>circNOL4</i> | miR-580-3p       | 1 |
| <i>circNOL4</i> | miR-589-5p       | 1 |
| <i>circNOL4</i> | miR-607          | 1 |
| <i>circNOL4</i> | miR-6077         | 1 |
| <i>circNOL4</i> | miR-641/3617-5p  | 1 |
| <i>circNOL4</i> | miR-6504-3p      | 1 |

|                  |                       |   |
|------------------|-----------------------|---|
| <i>circNOL4</i>  | miR-6508-3p           | 1 |
| <i>circNOL4</i>  | miR-6514-5p           | 1 |
| <i>circNOL4</i>  | miR-6515-3p           | 1 |
| <i>circNOL4</i>  | miR-652-3p            | 1 |
| <i>circNOL4</i>  | miR-655-5p            | 1 |
| <i>circNOL4</i>  | miR-656-3p            | 1 |
| <i>circNOL4</i>  | miR-6750-5p/6822-5p   | 1 |
| <i>circNOL4</i>  | miR-6762-5p/6845-5p   | 1 |
| <i>circNOL4</i>  | miR-6782-5p           | 1 |
| <i>circNOL4</i>  | miR-6789-5p           | 1 |
| <i>circNOL4</i>  | miR-6814-5p           | 1 |
| <i>circNOL4</i>  | miR-6818-5p           | 1 |
| <i>circNOL4</i>  | miR-6824-5p           | 1 |
| <i>circNOL4</i>  | miR-6833-5p           | 1 |
| <i>circNOL4</i>  | miR-6844              | 1 |
| <i>circNOL4</i>  | miR-6881-5p           | 1 |
| <i>circNOL4</i>  | miR-6895-5p           | 1 |
| <i>circNOL4</i>  | miR-7-5p              | 1 |
| <i>circNOL4</i>  | miR-7114-5p           | 1 |
| <i>circNOL4</i>  | miR-7158-5p           | 1 |
| <i>circNOL4</i>  | miR-7160-3p           | 1 |
| <i>circNOL4</i>  | miR-758-5p            | 1 |
| <i>circNOL4</i>  | miR-8066              | 1 |
| <i>circNOL4</i>  | miR-873-5p.1          | 2 |
| <i>circNOL4</i>  | miR-875-3p            | 1 |
| <i>circNOL4</i>  | miR-9500              | 1 |
| <i>circNRXN1</i> | let-7a-2-3p/let-7g-3p | 2 |
| <i>circNRXN1</i> | let-7c-3p             | 2 |
| <i>circNRXN1</i> | miR-1-3p/206          | 2 |
| <i>circNRXN1</i> | miR-1-5p              | 4 |
| <i>circNRXN1</i> | miR-103b              | 1 |
| <i>circNRXN1</i> | miR-105-5p            | 5 |
| <i>circNRXN1</i> | miR-106a-3p           | 3 |
| <i>circNRXN1</i> | miR-1178-3p           | 2 |
| <i>circNRXN1</i> | miR-1180-3p           | 2 |
| <i>circNRXN1</i> | miR-1183              | 8 |
| <i>circNRXN1</i> | miR-1184              | 3 |
| <i>circNRXN1</i> | miR-1185-5p           | 2 |

|                  |                          |   |
|------------------|--------------------------|---|
| <i>circNRXN1</i> | miR-1193                 | 2 |
| <i>circNRXN1</i> | miR-1199-5p/6751-3p      | 1 |
| <i>circNRXN1</i> | miR-1202/3972            | 2 |
| <i>circNRXN1</i> | miR-1203                 | 3 |
| <i>circNRXN1</i> | miR-1205                 | 3 |
| <i>circNRXN1</i> | miR-1206                 | 2 |
| <i>circNRXN1</i> | miR-1207-3p              | 3 |
| <i>circNRXN1</i> | miR-1207-5p/4763-3p      | 4 |
| <i>circNRXN1</i> | miR-1208                 | 2 |
| <i>circNRXN1</i> | miR-122-5p               | 2 |
| <i>circNRXN1</i> | miR-1224-3p              | 1 |
| <i>circNRXN1</i> | miR-1224-5p              | 1 |
| <i>circNRXN1</i> | miR-1225-3p              | 1 |
| <i>circNRXN1</i> | miR-1226-3p              | 2 |
| <i>circNRXN1</i> | miR-1228-3p              | 1 |
| <i>circNRXN1</i> | miR-1229-3p              | 1 |
| <i>circNRXN1</i> | miR-1231                 | 3 |
| <i>circNRXN1</i> | miR-1236-3p              | 1 |
| <i>circNRXN1</i> | miR-1236-5p              | 4 |
| <i>circNRXN1</i> | miR-1237-3p              | 1 |
| <i>circNRXN1</i> | miR-1237-5p/4488/4697-5p | 1 |
| <i>circNRXN1</i> | miR-1238-5p/4758-5p      | 1 |
| <i>circNRXN1</i> | miR-124-3p.1             | 1 |
| <i>circNRXN1</i> | miR-1243                 | 1 |
| <i>circNRXN1</i> | miR-1246                 | 2 |
| <i>circNRXN1</i> | miR-1248                 | 1 |
| <i>circNRXN1</i> | miR-1250-3p              | 3 |
| <i>circNRXN1</i> | miR-1251-3p              | 1 |
| <i>circNRXN1</i> | miR-1252-3p              | 2 |
| <i>circNRXN1</i> | miR-1252-5p              | 1 |
| <i>circNRXN1</i> | miR-1254/3116            | 2 |
| <i>circNRXN1</i> | miR-1255a/1255b-5p       | 4 |
| <i>circNRXN1</i> | miR-1255b-2-3p           | 4 |
| <i>circNRXN1</i> | miR-1256                 | 2 |
| <i>circNRXN1</i> | miR-125a-3p              | 4 |
| <i>circNRXN1</i> | miR-1262/4701-3p/6736-5p | 1 |
| <i>circNRXN1</i> | miR-1263                 | 1 |
| <i>circNRXN1</i> | miR-1265                 | 3 |



|                  |                    |   |
|------------------|--------------------|---|
| <i>circNRXN1</i> | miR-1269           | 2 |
| <i>circNRXN1</i> | miR-127-5p         | 2 |
| <i>circNRXN1</i> | miR-1272           | 3 |
| <i>circNRXN1</i> | miR-1273a          | 2 |
| <i>circNRXN1</i> | miR-1273c          | 1 |
| <i>circNRXN1</i> | miR-1273e          | 3 |
| <i>circNRXN1</i> | miR-1273g-5p       | 2 |
| <i>circNRXN1</i> | miR-1273h-3p       | 2 |
| <i>circNRXN1</i> | miR-1275/4665-5p   | 1 |
| <i>circNRXN1</i> | miR-1278           | 1 |
| <i>circNRXN1</i> | miR-1279           | 2 |
| <i>circNRXN1</i> | miR-128-1-5p       | 2 |
| <i>circNRXN1</i> | miR-128-3p         | 2 |
| <i>circNRXN1</i> | miR-1281           | 1 |
| <i>circNRXN1</i> | miR-1286           | 1 |
| <i>circNRXN1</i> | miR-1287-5p        | 5 |
| <i>circNRXN1</i> | miR-1288-3p        | 3 |
| <i>circNRXN1</i> | miR-1288-5p        | 2 |
| <i>circNRXN1</i> | miR-129-5p         | 2 |
| <i>circNRXN1</i> | miR-1290           | 2 |
| <i>circNRXN1</i> | miR-1293/4483      | 2 |
| <i>circNRXN1</i> | miR-1294           | 1 |
| <i>circNRXN1</i> | miR-1296-3p        | 2 |
| <i>circNRXN1</i> | miR-1298-3p        | 1 |
| <i>circNRXN1</i> | miR-1299           | 1 |
| <i>circNRXN1</i> | miR-1301-3p        | 1 |
| <i>circNRXN1</i> | miR-1304-3p        | 1 |
| <i>circNRXN1</i> | miR-1305           | 1 |
| <i>circNRXN1</i> | miR-1306-3p        | 1 |
| <i>circNRXN1</i> | miR-130b-5p        | 5 |
| <i>circNRXN1</i> | miR-132-3p/212-3p  | 4 |
| <i>circNRXN1</i> | miR-1322           | 3 |
| <i>circNRXN1</i> | miR-1323           | 3 |
| <i>circNRXN1</i> | miR-133a-3p.1      | 1 |
| <i>circNRXN1</i> | miR-133a-3p.2/133b | 1 |
| <i>circNRXN1</i> | miR-134-5p         | 4 |
| <i>circNRXN1</i> | miR-1343-3p        | 3 |
| <i>circNRXN1</i> | miR-135-5p         | 4 |

|                  |                   |   |
|------------------|-------------------|---|
| <i>circNRXN1</i> | miR-136-3p        | 1 |
| <i>circNRXN1</i> | miR-138-1-3p      | 2 |
| <i>circNRXN1</i> | miR-138-2-3p      | 1 |
| <i>circNRXN1</i> | miR-139-5p        | 1 |
| <i>circNRXN1</i> | miR-140-5p        | 2 |
| <i>circNRXN1</i> | miR-141-5p        | 3 |
| <i>circNRXN1</i> | miR-142-5p        | 4 |
| <i>circNRXN1</i> | miR-144-5p        | 3 |
| <i>circNRXN1</i> | miR-145-3p        | 1 |
| <i>circNRXN1</i> | miR-145-5p        | 2 |
| <i>circNRXN1</i> | miR-1468-3p       | 2 |
| <i>circNRXN1</i> | miR-1469          | 2 |
| <i>circNRXN1</i> | miR-146a-3p       | 6 |
| <i>circNRXN1</i> | miR-1470          | 4 |
| <i>circNRXN1</i> | miR-147a          | 1 |
| <i>circNRXN1</i> | miR-148-3p/152-3p | 2 |
| <i>circNRXN1</i> | miR-148a-5p       | 1 |
| <i>circNRXN1</i> | miR-149-5p        | 2 |
| <i>circNRXN1</i> | miR-150-3p        | 1 |
| <i>circNRXN1</i> | miR-153-3p        | 2 |
| <i>circNRXN1</i> | miR-153-5p        | 3 |
| <i>circNRXN1</i> | miR-1537-3p       | 1 |
| <i>circNRXN1</i> | miR-154-3p/487-3p | 5 |
| <i>circNRXN1</i> | miR-154-5p        | 1 |
| <i>circNRXN1</i> | miR-155-5p        | 2 |
| <i>circNRXN1</i> | miR-1587/3620-5p  | 3 |
| <i>circNRXN1</i> | miR-15a-3p        | 4 |
| <i>circNRXN1</i> | miR-17-3p         | 3 |
| <i>circNRXN1</i> | miR-18-5p         | 1 |
| <i>circNRXN1</i> | miR-181-3p/4420   | 1 |
| <i>circNRXN1</i> | miR-181-5p        | 2 |
| <i>circNRXN1</i> | miR-181c-3p       | 1 |
| <i>circNRXN1</i> | miR-181d-3p       | 1 |
| <i>circNRXN1</i> | miR-182-5p        | 2 |
| <i>circNRXN1</i> | miR-1825          | 1 |
| <i>circNRXN1</i> | miR-183-3p        | 4 |
| <i>circNRXN1</i> | miR-183-5p.1      | 9 |
| <i>circNRXN1</i> | miR-183-5p.2      | 4 |

|                  |                     |   |
|------------------|---------------------|---|
| <i>circNRXN1</i> | miR-184             | 1 |
| <i>circNRXN1</i> | miR-186-5p          | 4 |
| <i>circNRXN1</i> | miR-187-5p          | 2 |
| <i>circNRXN1</i> | miR-188-5p          | 1 |
| <i>circNRXN1</i> | miR-19-5p           | 1 |
| <i>circNRXN1</i> | miR-190-5p          | 2 |
| <i>circNRXN1</i> | miR-1909-3p/6722-3p | 1 |
| <i>circNRXN1</i> | miR-190a-3p         | 3 |
| <i>circNRXN1</i> | miR-191-5p          | 1 |
| <i>circNRXN1</i> | miR-1914-5p         | 2 |
| <i>circNRXN1</i> | miR-1915-5p         | 3 |
| <i>circNRXN1</i> | miR-192-3p          | 2 |
| <i>circNRXN1</i> | miR-192-5p/215-5p   | 1 |
| <i>circNRXN1</i> | miR-193-3p          | 2 |
| <i>circNRXN1</i> | miR-194-3p          | 9 |
| <i>circNRXN1</i> | miR-196a-3p         | 2 |
| <i>circNRXN1</i> | miR-196b-3p         | 2 |
| <i>circNRXN1</i> | miR-197-3p          | 4 |
| <i>circNRXN1</i> | miR-1972            | 2 |
| <i>circNRXN1</i> | miR-1973            | 1 |
| <i>circNRXN1</i> | miR-1976            | 3 |
| <i>circNRXN1</i> | miR-198             | 1 |
| <i>circNRXN1</i> | miR-199-5p          | 1 |
| <i>circNRXN1</i> | miR-203a-3p.1       | 4 |
| <i>circNRXN1</i> | miR-203a-5p         | 2 |
| <i>circNRXN1</i> | miR-205-5p          | 4 |
| <i>circNRXN1</i> | miR-2052            | 1 |
| <i>circNRXN1</i> | miR-2054            | 3 |
| <i>circNRXN1</i> | miR-208-5p          | 1 |
| <i>circNRXN1</i> | miR-20a-3p          | 1 |
| <i>circNRXN1</i> | miR-20b-3p          | 3 |
| <i>circNRXN1</i> | miR-21-5p/590-5p    | 1 |
| <i>circNRXN1</i> | miR-211-3p          | 1 |
| <i>circNRXN1</i> | miR-2110            | 2 |
| <i>circNRXN1</i> | miR-2114-3p         | 2 |
| <i>circNRXN1</i> | miR-2115-5p         | 1 |
| <i>circNRXN1</i> | miR-214-3p/3619-5p  | 2 |
| <i>circNRXN1</i> | miR-215-3p          | 5 |

|                  |                                              |   |
|------------------|----------------------------------------------|---|
| <i>circNRXN1</i> | miR-216b-3p                                  | 1 |
| <i>circNRXN1</i> | miR-217                                      | 1 |
| <i>circNRXN1</i> | miR-218-5p                                   | 1 |
| <i>circNRXN1</i> | miR-219-5p                                   | 3 |
| <i>circNRXN1</i> | miR-219a-1-3p                                | 1 |
| <i>circNRXN1</i> | miR-219a-2-3p                                | 1 |
| <i>circNRXN1</i> | miR-219b-3p                                  | 1 |
| <i>circNRXN1</i> | miR-219b-5p                                  | 1 |
| <i>circNRXN1</i> | miR-221-5p/8073                              | 2 |
| <i>circNRXN1</i> | miR-2276-3p                                  | 4 |
| <i>circNRXN1</i> | miR-2277-3p                                  | 2 |
| <i>circNRXN1</i> | miR-23-5p                                    | 1 |
| <i>circNRXN1</i> | miR-2355-5p                                  | 2 |
| <i>circNRXN1</i> | miR-2392                                     | 4 |
| <i>circNRXN1</i> | miR-24-5p                                    | 1 |
| <i>circNRXN1</i> | miR-2467-3p                                  | 2 |
| <i>circNRXN1</i> | miR-2467-5p                                  | 1 |
| <i>circNRXN1</i> | miR-25-3p/32-5p/92-3p/363-3p/367-3p          | 1 |
| <i>circNRXN1</i> | miR-26-3p                                    | 1 |
| <i>circNRXN1</i> | miR-2682-3p/6781-3p                          | 1 |
| <i>circNRXN1</i> | miR-27-3p                                    | 2 |
| <i>circNRXN1</i> | miR-27a-5p                                   | 2 |
| <i>circNRXN1</i> | miR-27b-5p                                   | 3 |
| <i>circNRXN1</i> | miR-296-5p                                   | 1 |
| <i>circNRXN1</i> | miR-29a-5p                                   | 2 |
| <i>circNRXN1</i> | miR-30-5p                                    | 1 |
| <i>circNRXN1</i> | miR-301a-5p/301b-5p                          | 1 |
| <i>circNRXN1</i> | miR-302a-5p                                  | 1 |
| <i>circNRXN1</i> | miR-302c-5p                                  | 3 |
| <i>circNRXN1</i> | miR-3065-3p                                  | 3 |
| <i>circNRXN1</i> | miR-3065-5p                                  | 2 |
| <i>circNRXN1</i> | miR-3074-3p                                  | 2 |
| <i>circNRXN1</i> | miR-3074-5p                                  | 1 |
| <i>circNRXN1</i> | miR-30b-3p/1273h-5p/3689-3p/6779-5p/6780a-5p | 1 |
| <i>circNRXN1</i> | miR-30c-3p/6788-5p                           | 1 |
| <i>circNRXN1</i> | miR-31-3p                                    | 3 |
| <i>circNRXN1</i> | miR-3119                                     | 2 |
| <i>circNRXN1</i> | miR-3120-3p                                  | 3 |

|                  |                          |   |
|------------------|--------------------------|---|
| <i>circNRXN1</i> | miR-3122/3913-5p         | 2 |
| <i>circNRXN1</i> | miR-3125/3916/6859-5p    | 3 |
| <i>circNRXN1</i> | miR-3126-3p              | 1 |
| <i>circNRXN1</i> | miR-3127-3p/6756-3p      | 1 |
| <i>circNRXN1</i> | miR-3127-5p              | 2 |
| <i>circNRXN1</i> | miR-3128                 | 3 |
| <i>circNRXN1</i> | miR-3130-3p              | 1 |
| <i>circNRXN1</i> | miR-3133                 | 4 |
| <i>circNRXN1</i> | miR-3134                 | 3 |
| <i>circNRXN1</i> | miR-3135b                | 5 |
| <i>circNRXN1</i> | miR-3136-3p/7155-3p      | 1 |
| <i>circNRXN1</i> | miR-3136-5p/4439         | 6 |
| <i>circNRXN1</i> | miR-3137                 | 3 |
| <i>circNRXN1</i> | miR-3138                 | 5 |
| <i>circNRXN1</i> | miR-3140-5p              | 2 |
| <i>circNRXN1</i> | miR-3143                 | 3 |
| <i>circNRXN1</i> | miR-3148                 | 2 |
| <i>circNRXN1</i> | miR-3149                 | 2 |
| <i>circNRXN1</i> | miR-3150a-3p             | 2 |
| <i>circNRXN1</i> | miR-3150a-5p/3150b-5p    | 8 |
| <i>circNRXN1</i> | miR-3150b-3p             | 1 |
| <i>circNRXN1</i> | miR-3151-5p              | 2 |
| <i>circNRXN1</i> | miR-3152-5p              | 1 |
| <i>circNRXN1</i> | miR-3153/6733-5p/6739-5p | 2 |
| <i>circNRXN1</i> | miR-3154                 | 1 |
| <i>circNRXN1</i> | miR-3158-5p              | 3 |
| <i>circNRXN1</i> | miR-3159                 | 4 |
| <i>circNRXN1</i> | miR-3160-5p              | 2 |
| <i>circNRXN1</i> | miR-3161                 | 2 |
| <i>circNRXN1</i> | miR-3162-3p              | 3 |
| <i>circNRXN1</i> | miR-3164                 | 4 |
| <i>circNRXN1</i> | miR-3165                 | 2 |
| <i>circNRXN1</i> | miR-3169                 | 2 |
| <i>circNRXN1</i> | miR-3174                 | 3 |
| <i>circNRXN1</i> | miR-3176/3922-3p         | 1 |
| <i>circNRXN1</i> | miR-3177-5p              | 1 |
| <i>circNRXN1</i> | miR-3179                 | 1 |
| <i>circNRXN1</i> | miR-3180-5p              | 2 |

|                  |                           |   |
|------------------|---------------------------|---|
| <i>circNRXN1</i> | miR-3182                  | 2 |
| <i>circNRXN1</i> | miR-3183/4723-3p/6769b-3p | 4 |
| <i>circNRXN1</i> | miR-3187-3p               | 3 |
| <i>circNRXN1</i> | miR-3188                  | 1 |
| <i>circNRXN1</i> | miR-3190-3p               | 3 |
| <i>circNRXN1</i> | miR-3190-5p               | 1 |
| <i>circNRXN1</i> | miR-3191-5p               | 2 |
| <i>circNRXN1</i> | miR-3192-3p               | 2 |
| <i>circNRXN1</i> | miR-3193                  | 1 |
| <i>circNRXN1</i> | miR-3194-3p               | 1 |
| <i>circNRXN1</i> | miR-3198/4309             | 6 |
| <i>circNRXN1</i> | miR-320                   | 2 |
| <i>circNRXN1</i> | miR-3200-3p               | 2 |
| <i>circNRXN1</i> | miR-3202                  | 1 |
| <i>circNRXN1</i> | miR-320e                  | 2 |
| <i>circNRXN1</i> | miR-323-3p                | 1 |
| <i>circNRXN1</i> | miR-328-5p/6885-5p        | 2 |
| <i>circNRXN1</i> | miR-329-5p                | 1 |
| <i>circNRXN1</i> | miR-33-5p                 | 1 |
| <i>circNRXN1</i> | miR-330-3p                | 2 |
| <i>circNRXN1</i> | miR-330-3p.2              | 2 |
| <i>circNRXN1</i> | miR-331-5p                | 1 |
| <i>circNRXN1</i> | miR-335-3p                | 2 |
| <i>circNRXN1</i> | miR-335-5p                | 2 |
| <i>circNRXN1</i> | miR-338-3p                | 3 |
| <i>circNRXN1</i> | miR-33a-3p                | 1 |
| <i>circNRXN1</i> | miR-345-3p                | 2 |
| <i>circNRXN1</i> | miR-345-5p                | 2 |
| <i>circNRXN1</i> | miR-346                   | 1 |
| <i>circNRXN1</i> | miR-3529-3p               | 2 |
| <i>circNRXN1</i> | miR-3605-5p               | 2 |
| <i>circNRXN1</i> | miR-3607-3p               | 5 |
| <i>circNRXN1</i> | miR-3607-5p               | 2 |
| <i>circNRXN1</i> | miR-361-5p                | 2 |
| <i>circNRXN1</i> | miR-3611                  | 4 |
| <i>circNRXN1</i> | miR-3612                  | 2 |
| <i>circNRXN1</i> | miR-3613-3p               | 3 |
| <i>circNRXN1</i> | miR-3613-5p               | 2 |

|                  |                       |   |
|------------------|-----------------------|---|
| <i>circNRXN1</i> | miR-3614-3p           | 1 |
| <i>circNRXN1</i> | miR-3614-5p           | 1 |
| <i>circNRXN1</i> | miR-3619-3p           | 3 |
| <i>circNRXN1</i> | miR-362-5p/500b-5p    | 1 |
| <i>circNRXN1</i> | miR-3620-3p           | 2 |
| <i>circNRXN1</i> | miR-3622a-3p/3622b-3p | 3 |
| <i>circNRXN1</i> | miR-3622b-5p          | 2 |
| <i>circNRXN1</i> | miR-363-5p/6745       | 2 |
| <i>circNRXN1</i> | miR-3646              | 2 |
| <i>circNRXN1</i> | miR-365-3p            | 2 |
| <i>circNRXN1</i> | miR-3650              | 2 |
| <i>circNRXN1</i> | miR-3652/4430         | 4 |
| <i>circNRXN1</i> | miR-3653-5p           | 3 |
| <i>circNRXN1</i> | miR-3654              | 1 |
| <i>circNRXN1</i> | miR-3655              | 2 |
| <i>circNRXN1</i> | miR-3657              | 1 |
| <i>circNRXN1</i> | miR-3659              | 1 |
| <i>circNRXN1</i> | miR-3660/4526         | 1 |
| <i>circNRXN1</i> | miR-3662              | 2 |
| <i>circNRXN1</i> | miR-3664-5p           | 5 |
| <i>circNRXN1</i> | miR-3665              | 5 |
| <i>circNRXN1</i> | miR-3667-3p           | 2 |
| <i>circNRXN1</i> | miR-3667-5p           | 1 |
| <i>circNRXN1</i> | miR-3668              | 1 |
| <i>circNRXN1</i> | miR-3671              | 6 |
| <i>circNRXN1</i> | miR-3677-5p           | 5 |
| <i>circNRXN1</i> | miR-3678-3p           | 2 |
| <i>circNRXN1</i> | miR-3679-3p           | 3 |
| <i>circNRXN1</i> | miR-3680-3p           | 1 |
| <i>circNRXN1</i> | miR-3681-5p           | 5 |
| <i>circNRXN1</i> | miR-3682-3p           | 3 |
| <i>circNRXN1</i> | miR-3682-5p           | 2 |
| <i>circNRXN1</i> | miR-3683              | 1 |
| <i>circNRXN1</i> | miR-3684              | 3 |
| <i>circNRXN1</i> | miR-3687/4442         | 1 |
| <i>circNRXN1</i> | miR-3688-3p           | 4 |
| <i>circNRXN1</i> | miR-3688-5p           | 4 |
| <i>circNRXN1</i> | miR-3690              | 2 |

|                  |                           |   |
|------------------|---------------------------|---|
| <i>circNRXN1</i> | miR-3691-5p               | 2 |
| <i>circNRXN1</i> | miR-3692-3p               | 1 |
| <i>circNRXN1</i> | miR-3692-5p               | 2 |
| <i>circNRXN1</i> | miR-370-3p                | 1 |
| <i>circNRXN1</i> | miR-371-5p                | 5 |
| <i>circNRXN1</i> | miR-3714                  | 1 |
| <i>circNRXN1</i> | miR-371b-5p/373-5p/616-5p | 5 |
| <i>circNRXN1</i> | miR-372-5p                | 5 |
| <i>circNRXN1</i> | miR-374b-3p               | 1 |
| <i>circNRXN1</i> | miR-374c-3p               | 2 |
| <i>circNRXN1</i> | miR-375                   | 2 |
| <i>circNRXN1</i> | miR-376-3p                | 1 |
| <i>circNRXN1</i> | miR-376a-2-5p             | 3 |
| <i>circNRXN1</i> | miR-376a-5p               | 3 |
| <i>circNRXN1</i> | miR-376c-3p               | 3 |
| <i>circNRXN1</i> | miR-377-3p                | 2 |
| <i>circNRXN1</i> | miR-377-5p/6086           | 1 |
| <i>circNRXN1</i> | miR-378-3p                | 1 |
| <i>circNRXN1</i> | miR-378g                  | 2 |
| <i>circNRXN1</i> | miR-378j/6839-5p          | 1 |
| <i>circNRXN1</i> | miR-380-3p                | 1 |
| <i>circNRXN1</i> | miR-380-5p/563            | 2 |
| <i>circNRXN1</i> | miR-381-3p                | 2 |
| <i>circNRXN1</i> | miR-382-5p                | 1 |
| <i>circNRXN1</i> | miR-383-3p                | 3 |
| <i>circNRXN1</i> | miR-3907                  | 2 |
| <i>circNRXN1</i> | miR-3910                  | 1 |
| <i>circNRXN1</i> | miR-3911                  | 1 |
| <i>circNRXN1</i> | miR-3912-3p               | 2 |
| <i>circNRXN1</i> | miR-3912-5p               | 1 |
| <i>circNRXN1</i> | miR-3914                  | 4 |
| <i>circNRXN1</i> | miR-3915                  | 1 |
| <i>circNRXN1</i> | miR-3920                  | 2 |
| <i>circNRXN1</i> | miR-3921/4653-5p          | 1 |
| <i>circNRXN1</i> | miR-3922-5p               | 2 |
| <i>circNRXN1</i> | miR-3924                  | 1 |
| <i>circNRXN1</i> | miR-3925-3p               | 1 |
| <i>circNRXN1</i> | miR-3926                  | 1 |



|                  |                       |   |
|------------------|-----------------------|---|
| <i>circNRXN1</i> | miR-3928-5p/6806-3p   | 2 |
| <i>circNRXN1</i> | miR-3929/4419b/4478   | 6 |
| <i>circNRXN1</i> | miR-3934-5p           | 4 |
| <i>circNRXN1</i> | miR-3936              | 1 |
| <i>circNRXN1</i> | miR-3940-3p           | 1 |
| <i>circNRXN1</i> | miR-3941              | 1 |
| <i>circNRXN1</i> | miR-3944-5p           | 1 |
| <i>circNRXN1</i> | miR-3973              | 1 |
| <i>circNRXN1</i> | miR-3974              | 3 |
| <i>circNRXN1</i> | miR-3975              | 1 |
| <i>circNRXN1</i> | miR-3976              | 2 |
| <i>circNRXN1</i> | miR-3978              | 5 |
| <i>circNRXN1</i> | miR-409-3p            | 2 |
| <i>circNRXN1</i> | miR-410-3p            | 1 |
| <i>circNRXN1</i> | miR-411-3p            | 1 |
| <i>circNRXN1</i> | miR-412-3p/6754-3p    | 2 |
| <i>circNRXN1</i> | miR-421               | 4 |
| <i>circNRXN1</i> | miR-425-5p            | 3 |
| <i>circNRXN1</i> | miR-4254              | 2 |
| <i>circNRXN1</i> | miR-4258              | 1 |
| <i>circNRXN1</i> | miR-4261              | 1 |
| <i>circNRXN1</i> | miR-4266              | 1 |
| <i>circNRXN1</i> | miR-4268              | 3 |
| <i>circNRXN1</i> | miR-4269/6715b-5p     | 2 |
| <i>circNRXN1</i> | miR-4270/4441/6754-5p | 2 |
| <i>circNRXN1</i> | miR-4272              | 2 |
| <i>circNRXN1</i> | miR-4274              | 2 |
| <i>circNRXN1</i> | miR-4276              | 5 |
| <i>circNRXN1</i> | miR-4277              | 1 |
| <i>circNRXN1</i> | miR-4279              | 1 |
| <i>circNRXN1</i> | miR-4280              | 1 |
| <i>circNRXN1</i> | miR-4281              | 3 |
| <i>circNRXN1</i> | miR-4282              | 2 |
| <i>circNRXN1</i> | miR-4283              | 1 |
| <i>circNRXN1</i> | miR-4286              | 1 |
| <i>circNRXN1</i> | miR-4287/4685-3p      | 5 |
| <i>circNRXN1</i> | miR-4297/5581-5p      | 1 |
| <i>circNRXN1</i> | miR-4299              | 3 |

|                  |                                              |   |
|------------------|----------------------------------------------|---|
| <i>circNRXN1</i> | miR-4302                                     | 1 |
| <i>circNRXN1</i> | miR-4303                                     | 2 |
| <i>circNRXN1</i> | miR-4305                                     | 1 |
| <i>circNRXN1</i> | miR-4307                                     | 3 |
| <i>circNRXN1</i> | miR-4312                                     | 1 |
| <i>circNRXN1</i> | miR-4314                                     | 2 |
| <i>circNRXN1</i> | miR-4316                                     | 1 |
| <i>circNRXN1</i> | miR-4318                                     | 2 |
| <i>circNRXN1</i> | miR-432-3p                                   | 4 |
| <i>circNRXN1</i> | miR-4327                                     | 2 |
| <i>circNRXN1</i> | miR-4417                                     | 1 |
| <i>circNRXN1</i> | miR-4421/5699-3p                             | 1 |
| <i>circNRXN1</i> | miR-4422                                     | 2 |
| <i>circNRXN1</i> | miR-4423-5p                                  | 1 |
| <i>circNRXN1</i> | miR-4427                                     | 2 |
| <i>circNRXN1</i> | miR-4433b-3p                                 | 1 |
| <i>circNRXN1</i> | miR-4433b-5p                                 | 3 |
| <i>circNRXN1</i> | miR-4435                                     | 3 |
| <i>circNRXN1</i> | miR-4436b-3p/4632-5p/6735-5p/6879-5p/7843-5p | 4 |
| <i>circNRXN1</i> | miR-4438                                     | 4 |
| <i>circNRXN1</i> | miR-4445-5p                                  | 3 |
| <i>circNRXN1</i> | miR-4447/4472                                | 2 |
| <i>circNRXN1</i> | miR-4448                                     | 3 |
| <i>circNRXN1</i> | miR-4449                                     | 3 |
| <i>circNRXN1</i> | miR-4450                                     | 2 |
| <i>circNRXN1</i> | miR-4452                                     | 4 |
| <i>circNRXN1</i> | miR-4453/4538                                | 2 |
| <i>circNRXN1</i> | miR-4456                                     | 3 |
| <i>circNRXN1</i> | miR-4463                                     | 2 |
| <i>circNRXN1</i> | miR-4469                                     | 5 |
| <i>circNRXN1</i> | miR-4470                                     | 4 |
| <i>circNRXN1</i> | miR-4475                                     | 2 |
| <i>circNRXN1</i> | miR-4476/6876-5p                             | 2 |
| <i>circNRXN1</i> | miR-448                                      | 2 |
| <i>circNRXN1</i> | miR-4480                                     | 1 |
| <i>circNRXN1</i> | miR-4481/4745-5p                             | 3 |
| <i>circNRXN1</i> | miR-4482-3p                                  | 3 |
| <i>circNRXN1</i> | miR-4485-5p                                  | 2 |

|                  |                     |   |
|------------------|---------------------|---|
| <i>circNRXN1</i> | miR-4486            | 2 |
| <i>circNRXN1</i> | miR-4489            | 1 |
| <i>circNRXN1</i> | miR-4490            | 1 |
| <i>circNRXN1</i> | miR-4493            | 1 |
| <i>circNRXN1</i> | miR-4495            | 1 |
| <i>circNRXN1</i> | miR-4496            | 1 |
| <i>circNRXN1</i> | miR-4499            | 2 |
| <i>circNRXN1</i> | miR-4501            | 3 |
| <i>circNRXN1</i> | miR-4502            | 4 |
| <i>circNRXN1</i> | miR-4505/5787       | 4 |
| <i>circNRXN1</i> | miR-4506            | 3 |
| <i>circNRXN1</i> | miR-4509            | 1 |
| <i>circNRXN1</i> | miR-450a-1-3p       | 2 |
| <i>circNRXN1</i> | miR-450b-3p/769-3p  | 4 |
| <i>circNRXN1</i> | miR-450b-5p         | 1 |
| <i>circNRXN1</i> | miR-451             | 1 |
| <i>circNRXN1</i> | miR-4511            | 2 |
| <i>circNRXN1</i> | miR-4513/6855-3p    | 2 |
| <i>circNRXN1</i> | miR-4514/4692       | 2 |
| <i>circNRXN1</i> | miR-4515            | 3 |
| <i>circNRXN1</i> | miR-4519            | 2 |
| <i>circNRXN1</i> | miR-451b            | 1 |
| <i>circNRXN1</i> | miR-452-3p          | 2 |
| <i>circNRXN1</i> | miR-452-5p/892-3p   | 1 |
| <i>circNRXN1</i> | miR-4520-2-3p       | 2 |
| <i>circNRXN1</i> | miR-4520-3p         | 2 |
| <i>circNRXN1</i> | miR-4522            | 5 |
| <i>circNRXN1</i> | miR-4523            | 1 |
| <i>circNRXN1</i> | miR-4524-5p         | 1 |
| <i>circNRXN1</i> | miR-4529-3p         | 2 |
| <i>circNRXN1</i> | miR-4529-5p         | 4 |
| <i>circNRXN1</i> | miR-4530            | 3 |
| <i>circNRXN1</i> | miR-4533            | 1 |
| <i>circNRXN1</i> | miR-4534/8082       | 3 |
| <i>circNRXN1</i> | miR-4535            | 4 |
| <i>circNRXN1</i> | miR-4536-3p         | 1 |
| <i>circNRXN1</i> | miR-455-5p          | 1 |
| <i>circNRXN1</i> | miR-4633-3p/6500-5p | 2 |

|                  |                          |   |
|------------------|--------------------------|---|
| <i>circNRXN1</i> | miR-4635                 | 2 |
| <i>circNRXN1</i> | miR-4638-3p              | 1 |
| <i>circNRXN1</i> | miR-4639-3p              | 4 |
| <i>circNRXN1</i> | miR-4639-5p              | 2 |
| <i>circNRXN1</i> | miR-4642                 | 8 |
| <i>circNRXN1</i> | miR-4643                 | 1 |
| <i>circNRXN1</i> | miR-4649-3p              | 1 |
| <i>circNRXN1</i> | miR-4650-5p              | 2 |
| <i>circNRXN1</i> | miR-4652-3p              | 6 |
| <i>circNRXN1</i> | miR-4653-3p              | 4 |
| <i>circNRXN1</i> | miR-4656                 | 3 |
| <i>circNRXN1</i> | miR-4658/6790-5p         | 1 |
| <i>circNRXN1</i> | miR-4659a-3p/4659b-3p    | 5 |
| <i>circNRXN1</i> | miR-466                  | 1 |
| <i>circNRXN1</i> | miR-4660                 | 1 |
| <i>circNRXN1</i> | miR-4662a-3p             | 1 |
| <i>circNRXN1</i> | miR-4663                 | 1 |
| <i>circNRXN1</i> | miR-4664-3p              | 2 |
| <i>circNRXN1</i> | miR-4666a-3p             | 2 |
| <i>circNRXN1</i> | miR-4666a-5p             | 1 |
| <i>circNRXN1</i> | miR-4666b                | 1 |
| <i>circNRXN1</i> | miR-4667-3p              | 4 |
| <i>circNRXN1</i> | miR-4667-5p/4700-5p/8089 | 2 |
| <i>circNRXN1</i> | miR-4668-3p              | 2 |
| <i>circNRXN1</i> | miR-4668-5p              | 2 |
| <i>circNRXN1</i> | miR-4669                 | 1 |
| <i>circNRXN1</i> | miR-4670-3p              | 1 |
| <i>circNRXN1</i> | miR-4672                 | 1 |
| <i>circNRXN1</i> | miR-4674                 | 3 |
| <i>circNRXN1</i> | miR-4675/4741            | 3 |
| <i>circNRXN1</i> | miR-4677-3p              | 6 |
| <i>circNRXN1</i> | miR-4679                 | 6 |
| <i>circNRXN1</i> | miR-4680-3p              | 2 |
| <i>circNRXN1</i> | miR-4682                 | 1 |
| <i>circNRXN1</i> | miR-4688/6743-5p         | 3 |
| <i>circNRXN1</i> | miR-4689/6858-5p         | 1 |
| <i>circNRXN1</i> | miR-4690-3p/5685         | 1 |
| <i>circNRXN1</i> | miR-4690-5p              | 1 |

|                  |                             |    |
|------------------|-----------------------------|----|
| <i>circNRXN1</i> | miR-4693-3p                 | 3  |
| <i>circNRXN1</i> | miR-4693-5p                 | 1  |
| <i>circNRXN1</i> | miR-4694-3p                 | 10 |
| <i>circNRXN1</i> | miR-4695-5p                 | 1  |
| <i>circNRXN1</i> | miR-4700-3p                 | 1  |
| <i>circNRXN1</i> | miR-4704-3p                 | 1  |
| <i>circNRXN1</i> | miR-4705                    | 3  |
| <i>circNRXN1</i> | miR-4707-3p                 | 1  |
| <i>circNRXN1</i> | miR-4707-5p                 | 1  |
| <i>circNRXN1</i> | miR-4708-3p                 | 1  |
| <i>circNRXN1</i> | miR-4709-5p                 | 2  |
| <i>circNRXN1</i> | miR-4710                    | 3  |
| <i>circNRXN1</i> | miR-4711-3p                 | 1  |
| <i>circNRXN1</i> | miR-4711-5p                 | 4  |
| <i>circNRXN1</i> | miR-4713-5p                 | 2  |
| <i>circNRXN1</i> | miR-4714-3p                 | 3  |
| <i>circNRXN1</i> | miR-4714-5p                 | 5  |
| <i>circNRXN1</i> | miR-4716-5p                 | 1  |
| <i>circNRXN1</i> | miR-4717-5p                 | 2  |
| <i>circNRXN1</i> | miR-4719                    | 2  |
| <i>circNRXN1</i> | miR-4720-3p                 | 1  |
| <i>circNRXN1</i> | miR-4720-5p/4799-3p/5588-5p | 3  |
| <i>circNRXN1</i> | miR-4722-3p/6727-3p         | 1  |
| <i>circNRXN1</i> | miR-4722-5p                 | 1  |
| <i>circNRXN1</i> | miR-4724-3p                 | 2  |
| <i>circNRXN1</i> | miR-4729                    | 3  |
| <i>circNRXN1</i> | miR-4731-3p/4801            | 2  |
| <i>circNRXN1</i> | miR-4733-3p                 | 2  |
| <i>circNRXN1</i> | miR-4733-5p                 | 2  |
| <i>circNRXN1</i> | miR-4736                    | 4  |
| <i>circNRXN1</i> | miR-4738-3p                 | 1  |
| <i>circNRXN1</i> | miR-4738-5p                 | 1  |
| <i>circNRXN1</i> | miR-4740-3p                 | 3  |
| <i>circNRXN1</i> | miR-4740-5p                 | 3  |
| <i>circNRXN1</i> | miR-4742-5p                 | 2  |
| <i>circNRXN1</i> | miR-4743-3p                 | 6  |
| <i>circNRXN1</i> | miR-4744                    | 1  |
| <i>circNRXN1</i> | miR-4751                    | 1  |

|                  |                     |   |
|------------------|---------------------|---|
| <i>circNRXN1</i> | miR-4752            | 1 |
| <i>circNRXN1</i> | miR-4753-3p         | 2 |
| <i>circNRXN1</i> | miR-4755-3p         | 3 |
| <i>circNRXN1</i> | miR-4757-3p         | 1 |
| <i>circNRXN1</i> | miR-4759            | 2 |
| <i>circNRXN1</i> | miR-4760-3p         | 2 |
| <i>circNRXN1</i> | miR-4760-5p/8061    | 1 |
| <i>circNRXN1</i> | miR-4761-3p         | 1 |
| <i>circNRXN1</i> | miR-4761-5p         | 1 |
| <i>circNRXN1</i> | miR-4762-3p         | 2 |
| <i>circNRXN1</i> | miR-4762-5p         | 4 |
| <i>circNRXN1</i> | miR-4764-5p         | 3 |
| <i>circNRXN1</i> | miR-4765            | 4 |
| <i>circNRXN1</i> | miR-4766-3p         | 1 |
| <i>circNRXN1</i> | miR-4768-5p/6833-3p | 4 |
| <i>circNRXN1</i> | miR-4769-3p/6817-5p | 2 |
| <i>circNRXN1</i> | miR-4772-3p         | 4 |
| <i>circNRXN1</i> | miR-4773            | 2 |
| <i>circNRXN1</i> | miR-4774-3p         | 1 |
| <i>circNRXN1</i> | miR-4774-5p         | 1 |
| <i>circNRXN1</i> | miR-4775            | 2 |
| <i>circNRXN1</i> | miR-4776-5p         | 4 |
| <i>circNRXN1</i> | miR-4777-5p         | 2 |
| <i>circNRXN1</i> | miR-4778-3p         | 1 |
| <i>circNRXN1</i> | miR-4778-5p         | 5 |
| <i>circNRXN1</i> | miR-4779            | 1 |
| <i>circNRXN1</i> | miR-4780            | 2 |
| <i>circNRXN1</i> | miR-4781-3p         | 2 |
| <i>circNRXN1</i> | miR-4782-5p/5706    | 1 |
| <i>circNRXN1</i> | miR-4786-3p         | 1 |
| <i>circNRXN1</i> | miR-4788            | 1 |
| <i>circNRXN1</i> | miR-4789-3p         | 1 |
| <i>circNRXN1</i> | miR-4790-3p         | 4 |
| <i>circNRXN1</i> | miR-4792            | 3 |
| <i>circNRXN1</i> | miR-4793-3p         | 1 |
| <i>circNRXN1</i> | miR-4796-3p         | 5 |
| <i>circNRXN1</i> | miR-4800-5p         | 5 |
| <i>circNRXN1</i> | miR-4802-5p         | 2 |

|                  |                             |   |
|------------------|-----------------------------|---|
| <i>circNRXN1</i> | miR-4803                    | 4 |
| <i>circNRXN1</i> | miR-4804-3p                 | 1 |
| <i>circNRXN1</i> | miR-4804-5p                 | 1 |
| <i>circNRXN1</i> | miR-484/3155                | 1 |
| <i>circNRXN1</i> | miR-485-5p                  | 1 |
| <i>circNRXN1</i> | miR-488-3p                  | 2 |
| <i>circNRXN1</i> | miR-488-5p                  | 1 |
| <i>circNRXN1</i> | miR-489-3p                  | 3 |
| <i>circNRXN1</i> | miR-490-3p                  | 1 |
| <i>circNRXN1</i> | miR-491-5p                  | 2 |
| <i>circNRXN1</i> | miR-492                     | 2 |
| <i>circNRXN1</i> | miR-493-3p                  | 1 |
| <i>circNRXN1</i> | miR-493-5p                  | 2 |
| <i>circNRXN1</i> | miR-494-3p                  | 2 |
| <i>circNRXN1</i> | miR-495-3p                  | 1 |
| <i>circNRXN1</i> | miR-495-5p                  | 1 |
| <i>circNRXN1</i> | miR-498                     | 3 |
| <i>circNRXN1</i> | miR-499a-3p/499b-3p         | 1 |
| <i>circNRXN1</i> | miR-5000-3p                 | 2 |
| <i>circNRXN1</i> | miR-5000-5p                 | 2 |
| <i>circNRXN1</i> | miR-5002-3p                 | 2 |
| <i>circNRXN1</i> | miR-5002-5p                 | 3 |
| <i>circNRXN1</i> | miR-5003-3p                 | 2 |
| <i>circNRXN1</i> | miR-5003-5p                 | 5 |
| <i>circNRXN1</i> | miR-5004-3p                 | 1 |
| <i>circNRXN1</i> | miR-5004-5p                 | 1 |
| <i>circNRXN1</i> | miR-5006-5p                 | 2 |
| <i>circNRXN1</i> | miR-5007-5p                 | 1 |
| <i>circNRXN1</i> | miR-5008-3p/6737-3p/7157-3p | 1 |
| <i>circNRXN1</i> | miR-5009-5p/8058            | 2 |
| <i>circNRXN1</i> | miR-500a-5p                 | 1 |
| <i>circNRXN1</i> | miR-501-5p                  | 1 |
| <i>circNRXN1</i> | miR-5011-3p                 | 1 |
| <i>circNRXN1</i> | miR-5011-5p                 | 2 |
| <i>circNRXN1</i> | miR-502-5p                  | 1 |
| <i>circNRXN1</i> | miR-505-3p.1                | 4 |
| <i>circNRXN1</i> | miR-505-3p.2                | 4 |
| <i>circNRXN1</i> | miR-506-5p                  | 1 |

|                  |                                         |    |
|------------------|-----------------------------------------|----|
| <i>circNRXN1</i> | miR-507/557                             | 1  |
| <i>circNRXN1</i> | miR-508-3p                              | 3  |
| <i>circNRXN1</i> | miR-5089-5p                             | 4  |
| <i>circNRXN1</i> | miR-509-3-5p/509-5p/4418                | 1  |
| <i>circNRXN1</i> | miR-5093                                | 4  |
| <i>circNRXN1</i> | miR-5094                                | 3  |
| <i>circNRXN1</i> | miR-5095/7151-3p                        | 1  |
| <i>circNRXN1</i> | miR-510-3p                              | 1  |
| <i>circNRXN1</i> | miR-511-3p                              | 1  |
| <i>circNRXN1</i> | miR-511-5p                              | 1  |
| <i>circNRXN1</i> | miR-512-5p                              | 2  |
| <i>circNRXN1</i> | miR-513a-5p                             | 2  |
| <i>circNRXN1</i> | miR-513b-5p                             | 2  |
| <i>circNRXN1</i> | miR-513c-5p/514b-5p                     | 5  |
| <i>circNRXN1</i> | miR-514a-3p                             | 6  |
| <i>circNRXN1</i> | miR-514a-5p                             | 5  |
| <i>circNRXN1</i> | miR-516a-3p/516b-3p/7162-5p             | 1  |
| <i>circNRXN1</i> | miR-516b-5p                             | 1  |
| <i>circNRXN1</i> | miR-5186                                | 3  |
| <i>circNRXN1</i> | miR-5187-3p                             | 2  |
| <i>circNRXN1</i> | miR-5187-5p                             | 5  |
| <i>circNRXN1</i> | miR-5188                                | 1  |
| <i>circNRXN1</i> | miR-518a-5p/527                         | 3  |
| <i>circNRXN1</i> | miR-518d-5p/519-5p                      | 2  |
| <i>circNRXN1</i> | miR-5193                                | 1  |
| <i>circNRXN1</i> | miR-5197-5p                             | 9  |
| <i>circNRXN1</i> | miR-519d-5p                             | 2  |
| <i>circNRXN1</i> | miR-520f-5p                             | 1  |
| <i>circNRXN1</i> | miR-520g-3p                             | 1  |
| <i>circNRXN1</i> | miR-520g-5p                             | 1  |
| <i>circNRXN1</i> | miR-522-3p                              | 10 |
| <i>circNRXN1</i> | miR-524-5p                              | 1  |
| <i>circNRXN1</i> | miR-539-3p                              | 4  |
| <i>circNRXN1</i> | miR-541-5p                              | 2  |
| <i>circNRXN1</i> | miR-543                                 | 1  |
| <i>circNRXN1</i> | miR-544a                                | 2  |
| <i>circNRXN1</i> | miR-545-3p                              | 4  |
| <i>circNRXN1</i> | miR-548ac/548bb-3p/548d-3p/548h-3p/548z |    |



|                  |                                                                  |   |
|------------------|------------------------------------------------------------------|---|
| <i>circNRXN1</i> | miR-548ai/548ag/548ba/570-5p                                     | 2 |
| <i>circNRXN1</i> | miR-548aj-5p/548f-5p/548g-5p/548x-5p                             | 2 |
| <i>circNRXN1</i> | miR-548ao-3p                                                     | 1 |
| <i>circNRXN1</i> | miR-548ap-3p/548aa/548t-3p                                       | 4 |
| <i>circNRXN1</i> | miR-548aq-3p/548am-3p/548aj-3p/548ah-3p/548ae-3p/548j-3p/548x-3p |   |
| <i>circNRXN1</i> | miR-548as-3p                                                     | 4 |
| <i>circNRXN1</i> | miR-548at-5p                                                     | 5 |
| <i>circNRXN1</i> | miR-548av-3p                                                     | 1 |
| <i>circNRXN1</i> | miR-548av-5p/548k/8054                                           | 1 |
| <i>circNRXN1</i> | miR-548aw                                                        | 3 |
| <i>circNRXN1</i> | miR-548ay-3p/548at-3p                                            | 4 |
| <i>circNRXN1</i> | miR-548ay-5p/548au-5p/548as-5p/548ar-5p/548aq-5p/548ap-5p/548am- |   |
| <i>circNRXN1</i> | miR-548az-3p/548ar-3p/548a-3p/548e-3p/548f-3p                    |   |
| <i>circNRXN1</i> | miR-548az-5p/548t-5p                                             | 3 |
| <i>circNRXN1</i> | miR-548b-3p                                                      | 2 |
| <i>circNRXN1</i> | miR-548c-3p                                                      | 3 |
| <i>circNRXN1</i> | miR-548g-3p                                                      | 3 |
| <i>circNRXN1</i> | miR-548l                                                         | 1 |
| <i>circNRXN1</i> | miR-548m                                                         | 3 |
| <i>circNRXN1</i> | miR-548n                                                         | 3 |
| <i>circNRXN1</i> | miR-548p                                                         | 2 |
| <i>circNRXN1</i> | miR-548q                                                         | 3 |
| <i>circNRXN1</i> | miR-548s                                                         | 3 |
| <i>circNRXN1</i> | miR-549a                                                         | 1 |
| <i>circNRXN1</i> | miR-550a-3-5p/550a-5p/1271-3p                                    | 2 |
| <i>circNRXN1</i> | miR-550b-2-5p                                                    | 1 |
| <i>circNRXN1</i> | miR-551b-5p                                                      | 4 |
| <i>circNRXN1</i> | miR-552-3p                                                       | 2 |
| <i>circNRXN1</i> | miR-552-5p                                                       | 1 |
| <i>circNRXN1</i> | miR-556-3p                                                       | 1 |
| <i>circNRXN1</i> | miR-5571-5p                                                      | 2 |
| <i>circNRXN1</i> | miR-5579-3p                                                      | 1 |
| <i>circNRXN1</i> | miR-5579-5p                                                      | 1 |
| <i>circNRXN1</i> | miR-5580-3p                                                      | 1 |
| <i>circNRXN1</i> | miR-5580-5p                                                      | 3 |
| <i>circNRXN1</i> | miR-5582-3p                                                      | 1 |
| <i>circNRXN1</i> | miR-5586-3p                                                      | 3 |
| <i>circNRXN1</i> | miR-5587-3p                                                      | 1 |

|                  |                  |   |
|------------------|------------------|---|
| <i>circNRXN1</i> | miR-5587-5p      | 2 |
| <i>circNRXN1</i> | miR-5589-3p      | 1 |
| <i>circNRXN1</i> | miR-561-3p       | 5 |
| <i>circNRXN1</i> | miR-561-5p       | 4 |
| <i>circNRXN1</i> | miR-567          | 1 |
| <i>circNRXN1</i> | miR-5683         | 3 |
| <i>circNRXN1</i> | miR-5684         | 1 |
| <i>circNRXN1</i> | miR-5689         | 3 |
| <i>circNRXN1</i> | miR-569          | 1 |
| <i>circNRXN1</i> | miR-5690         | 1 |
| <i>circNRXN1</i> | miR-5691         | 2 |
| <i>circNRXN1</i> | miR-5692a        | 3 |
| <i>circNRXN1</i> | miR-5693         | 9 |
| <i>circNRXN1</i> | miR-5695         | 2 |
| <i>circNRXN1</i> | miR-5696         | 3 |
| <i>circNRXN1</i> | miR-5701         | 3 |
| <i>circNRXN1</i> | miR-5702         | 1 |
| <i>circNRXN1</i> | miR-571          | 1 |
| <i>circNRXN1</i> | miR-573/3616-5p  | 1 |
| <i>circNRXN1</i> | miR-574-5p       | 1 |
| <i>circNRXN1</i> | miR-575/4676-5p  | 3 |
| <i>circNRXN1</i> | miR-579-3p       | 3 |
| <i>circNRXN1</i> | miR-580-5p       | 3 |
| <i>circNRXN1</i> | miR-582-3p       | 1 |
| <i>circNRXN1</i> | miR-584-3p       | 4 |
| <i>circNRXN1</i> | miR-586          | 2 |
| <i>circNRXN1</i> | miR-587          | 3 |
| <i>circNRXN1</i> | miR-588          | 3 |
| <i>circNRXN1</i> | miR-589-3p       | 2 |
| <i>circNRXN1</i> | miR-590-3p       | 2 |
| <i>circNRXN1</i> | miR-593-3p       | 2 |
| <i>circNRXN1</i> | miR-604          | 3 |
| <i>circNRXN1</i> | miR-605-3p       | 1 |
| <i>circNRXN1</i> | miR-605-5p       | 1 |
| <i>circNRXN1</i> | miR-607          | 4 |
| <i>circNRXN1</i> | miR-6070         | 1 |
| <i>circNRXN1</i> | miR-6071         | 2 |
| <i>circNRXN1</i> | miR-6072/6891-3p | 3 |

|                  |                                      |   |
|------------------|--------------------------------------|---|
| <i>circNRXN1</i> | miR-6074                             | 1 |
| <i>circNRXN1</i> | miR-6078                             | 1 |
| <i>circNRXN1</i> | miR-6081                             | 1 |
| <i>circNRXN1</i> | miR-6083                             | 1 |
| <i>circNRXN1</i> | miR-6084                             | 1 |
| <i>circNRXN1</i> | miR-6085/6813-5p                     | 3 |
| <i>circNRXN1</i> | miR-6090                             | 1 |
| <i>circNRXN1</i> | miR-610                              | 3 |
| <i>circNRXN1</i> | miR-612/1285-3p/3187-5p/5189-5p/6860 | 2 |
| <i>circNRXN1</i> | miR-6124                             | 2 |
| <i>circNRXN1</i> | miR-6125                             | 1 |
| <i>circNRXN1</i> | miR-6126                             | 2 |
| <i>circNRXN1</i> | miR-6128                             | 1 |
| <i>circNRXN1</i> | miR-6132/6836-5p                     | 1 |
| <i>circNRXN1</i> | miR-6134                             | 1 |
| <i>circNRXN1</i> | miR-616-3p                           | 4 |
| <i>circNRXN1</i> | miR-6165                             | 1 |
| <i>circNRXN1</i> | miR-617                              | 3 |
| <i>circNRXN1</i> | miR-619-3p                           | 2 |
| <i>circNRXN1</i> | miR-627-3p                           | 1 |
| <i>circNRXN1</i> | miR-628-5p                           | 1 |
| <i>circNRXN1</i> | miR-631/3661                         | 2 |
| <i>circNRXN1</i> | miR-632/4288                         | 3 |
| <i>circNRXN1</i> | miR-634                              | 2 |
| <i>circNRXN1</i> | miR-636                              | 1 |
| <i>circNRXN1</i> | miR-637                              | 2 |
| <i>circNRXN1</i> | miR-641/3617-5p                      | 1 |
| <i>circNRXN1</i> | miR-642-3p                           | 2 |
| <i>circNRXN1</i> | miR-642a-5p                          | 2 |
| <i>circNRXN1</i> | miR-643                              | 1 |
| <i>circNRXN1</i> | miR-644a                             | 1 |
| <i>circNRXN1</i> | miR-645                              | 4 |
| <i>circNRXN1</i> | miR-647                              | 1 |
| <i>circNRXN1</i> | miR-649                              | 1 |
| <i>circNRXN1</i> | miR-6500-3p                          | 1 |
| <i>circNRXN1</i> | miR-6501-3p                          | 2 |
| <i>circNRXN1</i> | miR-6501-5p                          | 1 |
| <i>circNRXN1</i> | miR-6502-3p                          | 1 |

|                  |                  |   |
|------------------|------------------|---|
| <i>circNRXN1</i> | miR-6505-3p      | 3 |
| <i>circNRXN1</i> | miR-6505-5p      | 2 |
| <i>circNRXN1</i> | miR-6507-5p      | 2 |
| <i>circNRXN1</i> | miR-651-3p       | 3 |
| <i>circNRXN1</i> | miR-6510-5p      | 1 |
| <i>circNRXN1</i> | miR-6511-3p      | 1 |
| <i>circNRXN1</i> | miR-6511-5p      | 1 |
| <i>circNRXN1</i> | miR-6512-5p      | 4 |
| <i>circNRXN1</i> | miR-6513-5p      | 2 |
| <i>circNRXN1</i> | miR-6514-3p      | 2 |
| <i>circNRXN1</i> | miR-6514-5p      | 2 |
| <i>circNRXN1</i> | miR-6515-3p      | 1 |
| <i>circNRXN1</i> | miR-6516-3p      | 1 |
| <i>circNRXN1</i> | miR-652-3p       | 1 |
| <i>circNRXN1</i> | miR-652-5p       | 1 |
| <i>circNRXN1</i> | miR-653-3p       | 1 |
| <i>circNRXN1</i> | miR-653-5p       | 1 |
| <i>circNRXN1</i> | miR-654-3p       | 2 |
| <i>circNRXN1</i> | miR-655-5p       | 1 |
| <i>circNRXN1</i> | miR-657          | 5 |
| <i>circNRXN1</i> | miR-659-5p       | 2 |
| <i>circNRXN1</i> | miR-660-3p       | 1 |
| <i>circNRXN1</i> | miR-661          | 2 |
| <i>circNRXN1</i> | miR-663b         | 1 |
| <i>circNRXN1</i> | miR-664a-5p/4794 | 2 |
| <i>circNRXN1</i> | miR-668-3p       | 1 |
| <i>circNRXN1</i> | miR-671-5p       | 2 |
| <i>circNRXN1</i> | miR-6719-3p      | 1 |
| <i>circNRXN1</i> | miR-6720-5p      | 1 |
| <i>circNRXN1</i> | miR-6728-3p      | 5 |
| <i>circNRXN1</i> | miR-6728-5p      | 4 |
| <i>circNRXN1</i> | miR-6729-3p      | 1 |
| <i>circNRXN1</i> | miR-6730-3p      | 1 |
| <i>circNRXN1</i> | miR-6731-3p      | 1 |
| <i>circNRXN1</i> | miR-6732-3p      | 2 |
| <i>circNRXN1</i> | miR-6733-3p      | 1 |
| <i>circNRXN1</i> | miR-6734-3p      | 2 |
| <i>circNRXN1</i> | miR-6736-3p      | 1 |

|                  |                     |   |
|------------------|---------------------|---|
| <i>circNRXN1</i> | miR-6738-3p         | 2 |
| <i>circNRXN1</i> | miR-6739-3p         | 2 |
| <i>circNRXN1</i> | miR-6740-3p         | 1 |
| <i>circNRXN1</i> | miR-6740-5p         | 1 |
| <i>circNRXN1</i> | miR-6741-5p         | 1 |
| <i>circNRXN1</i> | miR-6742-3p         | 1 |
| <i>circNRXN1</i> | miR-6742-5p         | 2 |
| <i>circNRXN1</i> | miR-6744-5p         | 4 |
| <i>circNRXN1</i> | miR-6747-3p         | 1 |
| <i>circNRXN1</i> | miR-6748-3p         | 1 |
| <i>circNRXN1</i> | miR-6751-5p/6803-5p | 1 |
| <i>circNRXN1</i> | miR-6755-3p         | 1 |
| <i>circNRXN1</i> | miR-6756-5p/6766-5p | 2 |
| <i>circNRXN1</i> | miR-6757-3p         | 5 |
| <i>circNRXN1</i> | miR-6757-5p         | 2 |
| <i>circNRXN1</i> | miR-6758-5p/6856-5p | 2 |
| <i>circNRXN1</i> | miR-6760-3p         | 2 |
| <i>circNRXN1</i> | miR-6762-3p         | 3 |
| <i>circNRXN1</i> | miR-6762-5p/6845-5p | 2 |
| <i>circNRXN1</i> | miR-6763-3p         | 2 |
| <i>circNRXN1</i> | miR-6765-3p         | 3 |
| <i>circNRXN1</i> | miR-6768-5p         | 2 |
| <i>circNRXN1</i> | miR-6772-3p         | 3 |
| <i>circNRXN1</i> | miR-6773-3p         | 5 |
| <i>circNRXN1</i> | miR-6776-3p         | 1 |
| <i>circNRXN1</i> | miR-6777-3p         | 3 |
| <i>circNRXN1</i> | miR-6778-3p         | 1 |
| <i>circNRXN1</i> | miR-6780a-3p        | 2 |
| <i>circNRXN1</i> | miR-6780b-3p        | 2 |
| <i>circNRXN1</i> | miR-6784-3p/6862-3p | 1 |
| <i>circNRXN1</i> | miR-6787-3p         | 1 |
| <i>circNRXN1</i> | miR-6790-3p         | 4 |
| <i>circNRXN1</i> | miR-6791-3p/6829-3p | 1 |
| <i>circNRXN1</i> | miR-6794-3p         | 1 |
| <i>circNRXN1</i> | miR-6795-3p         | 2 |
| <i>circNRXN1</i> | miR-6795-5p/6887-5p | 2 |
| <i>circNRXN1</i> | miR-6796-3p         | 2 |
| <i>circNRXN1</i> | miR-6800-3p         | 2 |

|                  |                     |   |
|------------------|---------------------|---|
| <i>circNRXN1</i> | miR-6807-5p         | 1 |
| <i>circNRXN1</i> | miR-6808-3p         | 3 |
| <i>circNRXN1</i> | miR-6809-3p         | 4 |
| <i>circNRXN1</i> | miR-6810-5p         | 2 |
| <i>circNRXN1</i> | miR-6813-3p         | 2 |
| <i>circNRXN1</i> | miR-6815-3p         | 4 |
| <i>circNRXN1</i> | miR-6817-3p         | 6 |
| <i>circNRXN1</i> | miR-6818-3p         | 7 |
| <i>circNRXN1</i> | miR-6818-5p         | 1 |
| <i>circNRXN1</i> | miR-6819-3p/6877-3p | 1 |
| <i>circNRXN1</i> | miR-6821-3p         | 4 |
| <i>circNRXN1</i> | miR-6821-5p         | 2 |
| <i>circNRXN1</i> | miR-6826-3p         | 2 |
| <i>circNRXN1</i> | miR-6827-5p         | 2 |
| <i>circNRXN1</i> | miR-6828-3p         | 2 |
| <i>circNRXN1</i> | miR-6828-5p         | 2 |
| <i>circNRXN1</i> | miR-6829-5p         | 3 |
| <i>circNRXN1</i> | miR-6830-5p         | 1 |
| <i>circNRXN1</i> | miR-6833-5p         | 1 |
| <i>circNRXN1</i> | miR-6837-3p         | 2 |
| <i>circNRXN1</i> | miR-6841-3p         | 3 |
| <i>circNRXN1</i> | miR-6842-3p         | 1 |
| <i>circNRXN1</i> | miR-6844            | 1 |
| <i>circNRXN1</i> | miR-6845-3p         | 3 |
| <i>circNRXN1</i> | miR-6846-5p/6848-5p | 1 |
| <i>circNRXN1</i> | miR-6849-3p         | 1 |
| <i>circNRXN1</i> | miR-6852-5p         | 1 |
| <i>circNRXN1</i> | miR-6853-3p         | 2 |
| <i>circNRXN1</i> | miR-6853-5p         | 2 |
| <i>circNRXN1</i> | miR-6854-5p         | 2 |
| <i>circNRXN1</i> | miR-6857-3p         | 2 |
| <i>circNRXN1</i> | miR-6857-5p         | 2 |
| <i>circNRXN1</i> | miR-6858-3p         | 3 |
| <i>circNRXN1</i> | miR-6861-3p         | 2 |
| <i>circNRXN1</i> | miR-6864-5p         | 2 |
| <i>circNRXN1</i> | miR-6865-3p         | 1 |
| <i>circNRXN1</i> | miR-6867-3p         | 2 |
| <i>circNRXN1</i> | miR-6867-5p         | 1 |

|                  |             |   |
|------------------|-------------|---|
| <i>circNRXN1</i> | miR-6868-3p | 3 |
| <i>circNRXN1</i> | miR-6868-5p | 3 |
| <i>circNRXN1</i> | miR-6870-3p | 3 |
| <i>circNRXN1</i> | miR-6871-5p | 3 |
| <i>circNRXN1</i> | miR-6873-3p | 7 |
| <i>circNRXN1</i> | miR-6874-5p | 4 |
| <i>circNRXN1</i> | miR-6875-3p | 5 |
| <i>circNRXN1</i> | miR-6878-3p | 1 |
| <i>circNRXN1</i> | miR-6879-3p | 4 |
| <i>circNRXN1</i> | miR-6880-5p | 2 |
| <i>circNRXN1</i> | miR-6881-3p | 2 |
| <i>circNRXN1</i> | miR-6882-3p | 2 |
| <i>circNRXN1</i> | miR-6883-3p | 4 |
| <i>circNRXN1</i> | miR-6885-3p | 3 |
| <i>circNRXN1</i> | miR-6887-3p | 2 |
| <i>circNRXN1</i> | miR-6888-3p | 7 |
| <i>circNRXN1</i> | miR-6889-3p | 1 |
| <i>circNRXN1</i> | miR-6890-3p | 3 |
| <i>circNRXN1</i> | miR-6894-3p | 2 |
| <i>circNRXN1</i> | miR-6894-5p | 1 |
| <i>circNRXN1</i> | miR-6895-3p | 2 |
| <i>circNRXN1</i> | miR-7106-3p | 1 |
| <i>circNRXN1</i> | miR-7108-3p | 1 |
| <i>circNRXN1</i> | miR-7109-3p | 2 |
| <i>circNRXN1</i> | miR-7109-5p | 1 |
| <i>circNRXN1</i> | miR-7110-3p | 6 |
| <i>circNRXN1</i> | miR-7111-3p | 2 |
| <i>circNRXN1</i> | miR-7112-3p | 4 |
| <i>circNRXN1</i> | miR-7113-3p | 5 |
| <i>circNRXN1</i> | miR-7150    | 5 |
| <i>circNRXN1</i> | miR-7152-5p | 1 |
| <i>circNRXN1</i> | miR-7153-3p | 2 |
| <i>circNRXN1</i> | miR-7154-3p | 1 |
| <i>circNRXN1</i> | miR-7155-5p | 2 |
| <i>circNRXN1</i> | miR-7156-3p | 1 |
| <i>circNRXN1</i> | miR-7158-5p | 4 |
| <i>circNRXN1</i> | miR-7159-3p | 3 |
| <i>circNRXN1</i> | miR-7159-5p | 4 |

|                  |                           |   |
|------------------|---------------------------|---|
| <i>circNRXN1</i> | miR-7160-5p               | 1 |
| <i>circNRXN1</i> | miR-7162-3p               | 1 |
| <i>circNRXN1</i> | miR-744-3p                | 1 |
| <i>circNRXN1</i> | miR-7515                  | 1 |
| <i>circNRXN1</i> | miR-758-5p                | 2 |
| <i>circNRXN1</i> | miR-762/4492/4498/5001-5p | 3 |
| <i>circNRXN1</i> | miR-765                   | 1 |
| <i>circNRXN1</i> | miR-766-3p                | 1 |
| <i>circNRXN1</i> | miR-766-5p                | 1 |
| <i>circNRXN1</i> | miR-767-3p                | 6 |
| <i>circNRXN1</i> | miR-7702                  | 3 |
| <i>circNRXN1</i> | miR-7843-3p               | 2 |
| <i>circNRXN1</i> | miR-7845-5p               | 2 |
| <i>circNRXN1</i> | miR-7849-3p               | 1 |
| <i>circNRXN1</i> | miR-7851-3p               | 2 |
| <i>circNRXN1</i> | miR-7852-3p               | 1 |
| <i>circNRXN1</i> | miR-7854-3p               | 1 |
| <i>circNRXN1</i> | miR-7855-5p               | 3 |
| <i>circNRXN1</i> | miR-7977                  | 2 |
| <i>circNRXN1</i> | miR-7978                  | 3 |
| <i>circNRXN1</i> | miR-8055                  | 1 |
| <i>circNRXN1</i> | miR-8056                  | 2 |
| <i>circNRXN1</i> | miR-8064                  | 2 |
| <i>circNRXN1</i> | miR-8065                  | 1 |
| <i>circNRXN1</i> | miR-8068                  | 1 |
| <i>circNRXN1</i> | miR-8070                  | 1 |
| <i>circNRXN1</i> | miR-8071                  | 2 |
| <i>circNRXN1</i> | miR-8074                  | 2 |
| <i>circNRXN1</i> | miR-8076                  | 2 |
| <i>circNRXN1</i> | miR-8077                  | 1 |
| <i>circNRXN1</i> | miR-8083                  | 2 |
| <i>circNRXN1</i> | miR-873-3p                | 6 |
| <i>circNRXN1</i> | miR-873-5p.1              | 4 |
| <i>circNRXN1</i> | miR-873-5p.2              | 1 |
| <i>circNRXN1</i> | miR-875-3p                | 4 |
| <i>circNRXN1</i> | miR-876-5p                | 2 |
| <i>circNRXN1</i> | miR-887-5p                | 2 |
| <i>circNRXN1</i> | miR-888-3p                | 1 |



|                  |                                      |   |
|------------------|--------------------------------------|---|
| <i>circNRXN1</i> | miR-889-5p                           | 4 |
| <i>circNRXN1</i> | miR-891a-3p                          | 4 |
| <i>circNRXN1</i> | miR-891a-5p                          | 2 |
| <i>circNRXN1</i> | miR-892-5p                           | 1 |
| <i>circNRXN1</i> | miR-892a                             | 2 |
| <i>circNRXN1</i> | miR-892b                             | 1 |
| <i>circNRXN1</i> | miR-9-3p                             | 1 |
| <i>circNRXN1</i> | miR-920/4300/5591-5p/6726-5p         | 1 |
| <i>circNRXN1</i> | miR-922                              | 2 |
| <i>circNRXN1</i> | miR-93-3p                            | 2 |
| <i>circNRXN1</i> | miR-935                              | 1 |
| <i>circNRXN1</i> | miR-939-3p                           | 1 |
| <i>circNRXN1</i> | miR-942-3p                           | 1 |
| <i>circNRXN1</i> | miR-942-5p                           | 4 |
| <i>circNRXN1</i> | miR-943                              | 6 |
| <i>circNRXN1</i> | miR-96-5p/1271-5p                    | 2 |
| <i>circNRXN1</i> | miR-99-3p                            | 2 |
| <i>circNRXN1</i> | miR-101-3p.1                         | 1 |
| <i>circNRXN1</i> | miR-103-3p/107                       | 2 |
| <i>circNRXN1</i> | miR-106b-3p                          | 1 |
| <i>circNRXN1</i> | miR-1178-5p                          | 2 |
| <i>circNRXN1</i> | miR-1182                             | 2 |
| <i>circNRXN1</i> | miR-124-5p                           | 2 |
| <i>circNRXN1</i> | miR-1245a/8079                       | 2 |
| <i>circNRXN1</i> | miR-125-5p                           | 2 |
| <i>circNRXN1</i> | miR-1257                             | 2 |
| <i>circNRXN1</i> | miR-1266-5p/4518                     | 2 |
| <i>circNRXN1</i> | miR-1276                             | 2 |
| <i>circNRXN1</i> | miR-1277-5p                          | 2 |
| <i>circNRXN1</i> | miR-135b-3p                          | 1 |
| <i>circNRXN1</i> | miR-137                              | 2 |
| <i>circNRXN1</i> | miR-140-3p.2                         | 2 |
| <i>circNRXN1</i> | miR-144-3p                           | 1 |
| <i>circNRXN1</i> | miR-146b-3p                          | 2 |
| <i>circNRXN1</i> | miR-15-5p/16-5p/195-5p/424-5p/497-5p | 2 |
| <i>circNRXN1</i> | miR-16-2-3p/195-3p                   | 2 |
| <i>circNRXN1</i> | miR-181a-2-3p                        | 2 |
| <i>circNRXN1</i> | miR-1827                             | 2 |

|                  |                      |   |
|------------------|----------------------|---|
| <i>circNRXN1</i> | miR-1910-3p/6511a-5p | 2 |
| <i>circNRXN1</i> | miR-1910-5p          | 2 |
| <i>circNRXN1</i> | miR-193a-5p          | 2 |
| <i>circNRXN1</i> | miR-194-5p           | 2 |
| <i>circNRXN1</i> | miR-200-3p/429       | 2 |
| <i>circNRXN1</i> | miR-202-3p           | 1 |
| <i>circNRXN1</i> | miR-204-3p/4646-5p   | 2 |
| <i>circNRXN1</i> | miR-2114-5p          | 2 |
| <i>circNRXN1</i> | miR-214-5p           | 2 |
| <i>circNRXN1</i> | miR-221-3p/222-3p    | 2 |
| <i>circNRXN1</i> | miR-222-5p           | 1 |
| <i>circNRXN1</i> | miR-223-3p           | 1 |
| <i>circNRXN1</i> | miR-224-5p           | 2 |
| <i>circNRXN1</i> | miR-2861             | 2 |
| <i>circNRXN1</i> | miR-3064-3p          | 2 |
| <i>circNRXN1</i> | miR-3064-5p          | 3 |
| <i>circNRXN1</i> | miR-3115             | 3 |
| <i>circNRXN1</i> | miR-3120-5p          | 5 |
| <i>circNRXN1</i> | miR-3121-5p          | 2 |
| <i>circNRXN1</i> | miR-3123             | 2 |
| <i>circNRXN1</i> | miR-3144-3p          | 2 |
| <i>circNRXN1</i> | miR-3157-3p          | 2 |
| <i>circNRXN1</i> | miR-3160-3p          | 2 |
| <i>circNRXN1</i> | miR-3170/6855-5p     | 2 |
| <i>circNRXN1</i> | miR-3173-5p          | 2 |
| <i>circNRXN1</i> | miR-3185             | 2 |
| <i>circNRXN1</i> | miR-3192-5p          | 2 |
| <i>circNRXN1</i> | miR-3200-5p          | 2 |
| <i>circNRXN1</i> | miR-324-5p           | 1 |
| <i>circNRXN1</i> | miR-326              | 2 |
| <i>circNRXN1</i> | miR-338-5p           | 2 |
| <i>circNRXN1</i> | miR-34-5p/449-5p     | 2 |
| <i>circNRXN1</i> | miR-34b-5p/449c-5p   | 2 |
| <i>circNRXN1</i> | miR-3610             | 2 |
| <i>circNRXN1</i> | miR-3663-5p          | 2 |
| <i>circNRXN1</i> | miR-3664-3p          | 2 |
| <i>circNRXN1</i> | miR-383-5p.1         | 2 |
| <i>circNRXN1</i> | miR-3923             | 2 |

|                  |                     |   |
|------------------|---------------------|---|
| <i>circNRXN1</i> | miR-3925-5p         | 2 |
| <i>circNRXN1</i> | miR-3928-3p         | 3 |
| <i>circNRXN1</i> | miR-3942-3p         | 2 |
| <i>circNRXN1</i> | miR-3945            | 1 |
| <i>circNRXN1</i> | miR-3977            | 2 |
| <i>circNRXN1</i> | miR-4253/6862-5p    | 1 |
| <i>circNRXN1</i> | miR-4257            | 2 |
| <i>circNRXN1</i> | miR-4267            | 1 |
| <i>circNRXN1</i> | miR-4278            | 1 |
| <i>circNRXN1</i> | miR-4289            | 1 |
| <i>circNRXN1</i> | miR-4291            | 1 |
| <i>circNRXN1</i> | miR-4293            | 2 |
| <i>circNRXN1</i> | miR-4311            | 2 |
| <i>circNRXN1</i> | miR-4320            | 2 |
| <i>circNRXN1</i> | miR-4433a-5p        | 2 |
| <i>circNRXN1</i> | miR-4443            | 2 |
| <i>circNRXN1</i> | miR-4460            | 2 |
| <i>circNRXN1</i> | miR-4462            | 2 |
| <i>circNRXN1</i> | miR-4487            | 2 |
| <i>circNRXN1</i> | miR-4504            | 2 |
| <i>circNRXN1</i> | miR-4520-5p         | 1 |
| <i>circNRXN1</i> | miR-4524b-3p        | 1 |
| <i>circNRXN1</i> | miR-4527/6503-5p    | 2 |
| <i>circNRXN1</i> | miR-455-3p.1        | 2 |
| <i>circNRXN1</i> | miR-4645-3p         | 1 |
| <i>circNRXN1</i> | miR-4661-3p         | 2 |
| <i>circNRXN1</i> | miR-4685-5p/6837-5p | 2 |
| <i>circNRXN1</i> | miR-4686            | 1 |
| <i>circNRXN1</i> | miR-4687-3p         | 3 |
| <i>circNRXN1</i> | miR-4696            | 2 |
| <i>circNRXN1</i> | miR-4697-3p         | 1 |
| <i>circNRXN1</i> | miR-4699-5p         | 2 |
| <i>circNRXN1</i> | miR-4713-3p         | 2 |
| <i>circNRXN1</i> | miR-4715-3p         | 2 |
| <i>circNRXN1</i> | miR-4727-3p         | 2 |
| <i>circNRXN1</i> | miR-4728-3p         | 2 |
| <i>circNRXN1</i> | miR-4731-5p         | 2 |
| <i>circNRXN1</i> | miR-4732-3p         | 2 |

|                  |                    |   |
|------------------|--------------------|---|
| <i>circNRXN1</i> | miR-4764-3p        | 2 |
| <i>circNRXN1</i> | miR-4766-5p        | 2 |
| <i>circNRXN1</i> | miR-4772-5p        | 2 |
| <i>circNRXN1</i> | miR-4776-3p        | 2 |
| <i>circNRXN1</i> | miR-486-3p         | 1 |
| <i>circNRXN1</i> | miR-503-5p         | 2 |
| <i>circNRXN1</i> | miR-5088-3p        | 2 |
| <i>circNRXN1</i> | miR-5089-3p        | 2 |
| <i>circNRXN1</i> | miR-518c-5p        | 2 |
| <i>circNRXN1</i> | miR-5190           | 2 |
| <i>circNRXN1</i> | miR-5197-3p        | 4 |
| <i>circNRXN1</i> | miR-532-5p         | 2 |
| <i>circNRXN1</i> | miR-539-5p         | 1 |
| <i>circNRXN1</i> | miR-542-3p         | 2 |
| <i>circNRXN1</i> | miR-545-5p         | 2 |
| <i>circNRXN1</i> | miR-548au-3p       | 2 |
| <i>circNRXN1</i> | miR-548u/7161-5p   | 1 |
| <i>circNRXN1</i> | miR-548v           | 2 |
| <i>circNRXN1</i> | miR-558            | 2 |
| <i>circNRXN1</i> | miR-5585-3p        | 2 |
| <i>circNRXN1</i> | miR-5586-5p        | 1 |
| <i>circNRXN1</i> | miR-5588-3p        | 2 |
| <i>circNRXN1</i> | miR-5589-5p        | 2 |
| <i>circNRXN1</i> | miR-5705           | 1 |
| <i>circNRXN1</i> | miR-583            | 2 |
| <i>circNRXN1</i> | miR-584-5p         | 2 |
| <i>circNRXN1</i> | miR-596            | 2 |
| <i>circNRXN1</i> | miR-606            | 1 |
| <i>circNRXN1</i> | miR-6076/6797-3p   | 2 |
| <i>circNRXN1</i> | miR-6080           | 2 |
| <i>circNRXN1</i> | miR-615-5p         | 2 |
| <i>circNRXN1</i> | miR-618            | 2 |
| <i>circNRXN1</i> | miR-619-5p/6506-5p | 2 |
| <i>circNRXN1</i> | miR-626/6876-3p    | 5 |
| <i>circNRXN1</i> | miR-638            | 2 |
| <i>circNRXN1</i> | miR-646            | 2 |
| <i>circNRXN1</i> | miR-6499-3p        | 2 |
| <i>circNRXN1</i> | miR-6507-3p        | 2 |

|                  |                             |   |
|------------------|-----------------------------|---|
| <i>circNRXN1</i> | miR-6515-5p                 | 2 |
| <i>circNRXN1</i> | miR-664b-5p                 | 2 |
| <i>circNRXN1</i> | miR-6737-5p/6812-5p/6819-5p | 2 |
| <i>circNRXN1</i> | miR-6753-3p/7107-3p         | 2 |
| <i>circNRXN1</i> | miR-6753-5p                 | 1 |
| <i>circNRXN1</i> | miR-6759-3p                 | 2 |
| <i>circNRXN1</i> | miR-6764-3p/6824-3p         | 2 |
| <i>circNRXN1</i> | miR-6771-3p                 | 4 |
| <i>circNRXN1</i> | miR-6789-5p                 | 1 |
| <i>circNRXN1</i> | miR-6798-5p                 | 2 |
| <i>circNRXN1</i> | miR-6811-3p                 | 2 |
| <i>circNRXN1</i> | miR-6823-5p                 | 2 |
| <i>circNRXN1</i> | miR-6824-5p                 | 1 |
| <i>circNRXN1</i> | miR-6847-5p                 | 2 |
| <i>circNRXN1</i> | miR-6856-3p                 | 2 |
| <i>circNRXN1</i> | miR-6872-3p                 | 2 |
| <i>circNRXN1</i> | miR-7113-5p                 | 2 |
| <i>circNRXN1</i> | miR-7114-5p                 | 1 |
| <i>circNRXN1</i> | miR-7152-3p                 | 2 |
| <i>circNRXN1</i> | miR-7704                    | 2 |
| <i>circNRXN1</i> | miR-7844-5p                 | 1 |
| <i>circNRXN1</i> | miR-7847-3p                 | 2 |
| <i>circNRXN1</i> | miR-7974                    | 3 |
| <i>circNRXN1</i> | miR-7976                    | 2 |
| <i>circNRXN1</i> | miR-802                     | 2 |
| <i>circNRXN1</i> | miR-8062                    | 2 |
| <i>circNRXN1</i> | miR-8075                    | 2 |
| <i>circNRXN1</i> | miR-8084                    | 2 |
| <i>circNRXN1</i> | miR-874-3p                  | 2 |
| <i>circNRXN1</i> | miR-940/6808-5p/6893-5p     | 2 |
| <i>circNRXN1</i> | miR-1253                    | 2 |
| <i>circNRXN1</i> | miR-1284                    | 1 |
| <i>circNRXN1</i> | miR-151-3p                  | 1 |
| <i>circNRXN1</i> | miR-200c-5p/550a-3p         | 1 |
| <i>circNRXN1</i> | miR-21-3p/3591-3p           | 1 |
| <i>circNRXN1</i> | miR-2278                    | 1 |
| <i>circNRXN1</i> | miR-302b-5p/302d-5p         | 1 |
| <i>circNRXN1</i> | miR-3117-3p                 | 1 |

|                  |                     |   |
|------------------|---------------------|---|
| <i>circNRXN1</i> | miR-34b-3p          | 1 |
| <i>circNRXN1</i> | miR-34c-3p          | 1 |
| <i>circNRXN1</i> | miR-3658            | 1 |
| <i>circNRXN1</i> | miR-383-5p.2        | 1 |
| <i>circNRXN1</i> | miR-4259            | 1 |
| <i>circNRXN1</i> | miR-4325            | 1 |
| <i>circNRXN1</i> | miR-4468            | 1 |
| <i>circNRXN1</i> | miR-4715-5p         | 1 |
| <i>circNRXN1</i> | miR-4750-3p         | 1 |
| <i>circNRXN1</i> | miR-4793-5p         | 1 |
| <i>circNRXN1</i> | miR-483-3p.1        | 1 |
| <i>circNRXN1</i> | miR-483-3p.2        | 1 |
| <i>circNRXN1</i> | miR-486-5p          | 1 |
| <i>circNRXN1</i> | miR-509-3p          | 1 |
| <i>circNRXN1</i> | miR-5189-3p         | 2 |
| <i>circNRXN1</i> | miR-5196-3p         | 1 |
| <i>circNRXN1</i> | miR-525-5p          | 1 |
| <i>circNRXN1</i> | miR-5694            | 1 |
| <i>circNRXN1</i> | miR-6077            | 1 |
| <i>circNRXN1</i> | miR-6079            | 1 |
| <i>circNRXN1</i> | miR-640             | 2 |
| <i>circNRXN1</i> | miR-6770-5p         | 2 |
| <i>circNRXN1</i> | miR-6815-5p/6865-5p | 1 |
| <i>circNRXN1</i> | miR-7-5p            | 1 |
| <i>circNRXN1</i> | miR-7703            | 1 |
| <i>circNRXN1</i> | miR-924             | 1 |
| <i>circNRXN1</i> | miR-1228-5p         | 2 |
| <i>circNRXN1</i> | miR-1264            | 1 |
| <i>circNRXN1</i> | miR-22-3p           | 1 |
| <i>circNRXN1</i> | miR-26b-3p          | 1 |
| <i>circNRXN1</i> | miR-299-3p          | 1 |
| <i>circNRXN1</i> | miR-30-3p           | 1 |
| <i>circNRXN1</i> | miR-3184-3p         | 1 |
| <i>circNRXN1</i> | miR-3686            | 1 |
| <i>circNRXN1</i> | miR-4255            | 1 |
| <i>circNRXN1</i> | miR-4273/7156-5p    | 1 |
| <i>circNRXN1</i> | miR-4326            | 1 |
| <i>circNRXN1</i> | miR-4436b-5p        | 1 |

|                  |                     |   |
|------------------|---------------------|---|
| <i>circNRXN1</i> | miR-4437            | 1 |
| <i>circNRXN1</i> | miR-4491/4657       | 1 |
| <i>circNRXN1</i> | miR-4649-5p/6729-5p | 2 |
| <i>circNRXN1</i> | miR-4677-5p         | 1 |
| <i>circNRXN1</i> | miR-4678            | 1 |
| <i>circNRXN1</i> | miR-497-3p          | 1 |
| <i>circNRXN1</i> | miR-551-3p          | 2 |
| <i>circNRXN1</i> | miR-578             | 1 |
| <i>circNRXN1</i> | miR-6509-3p         | 1 |
| <i>circNRXN1</i> | miR-6715a-3p        | 1 |
| <i>circNRXN1</i> | miR-6715b-3p        | 1 |
| <i>circNRXN1</i> | miR-6722-5p         | 2 |
| <i>circNRXN1</i> | miR-6804-3p         | 2 |
| <i>circNRXN1</i> | miR-6822-3p         | 1 |
| <i>circNRXN1</i> | miR-6884-3p         | 1 |
| <i>circNRXN1</i> | miR-760             | 1 |
| <i>circNRXN1</i> | miR-8066            | 1 |
| <i>circNRXN1</i> | miR-944             | 1 |
| <i>circPDE4B</i> | miR-100-3p          | 1 |
| <i>circPDE4B</i> | miR-101-3p.2        | 2 |
| <i>circPDE4B</i> | miR-1183            | 2 |
| <i>circPDE4B</i> | miR-1199-5p/6751-3p | 1 |
| <i>circPDE4B</i> | miR-1200            | 2 |
| <i>circPDE4B</i> | miR-1231            | 1 |
| <i>circPDE4B</i> | miR-1234-3p/7107-5p | 1 |
| <i>circPDE4B</i> | miR-1237-3p         | 1 |
| <i>circPDE4B</i> | miR-124-3p.1        | 1 |
| <i>circPDE4B</i> | miR-1243            | 1 |
| <i>circPDE4B</i> | miR-1248            | 1 |
| <i>circPDE4B</i> | miR-1254/3116       | 3 |
| <i>circPDE4B</i> | miR-1265            | 1 |
| <i>circPDE4B</i> | miR-1266-5p/4518    | 1 |
| <i>circPDE4B</i> | miR-1273e           | 1 |
| <i>circPDE4B</i> | miR-1289            | 1 |
| <i>circPDE4B</i> | miR-1290            | 1 |
| <i>circPDE4B</i> | miR-1343-3p         | 1 |
| <i>circPDE4B</i> | miR-135b-3p         | 1 |
| <i>circPDE4B</i> | miR-143-5p          | 1 |

|                  |                           |   |
|------------------|---------------------------|---|
| <i>circPDE4B</i> | miR-145-3p                | 1 |
| <i>circPDE4B</i> | miR-149-5p                | 1 |
| <i>circPDE4B</i> | miR-181-5p                | 1 |
| <i>circPDE4B</i> | miR-1910-3p/6511a-5p      | 1 |
| <i>circPDE4B</i> | miR-1915-5p               | 1 |
| <i>circPDE4B</i> | miR-194-3p                | 3 |
| <i>circPDE4B</i> | miR-1976                  | 2 |
| <i>circPDE4B</i> | miR-203b-5p/6718-5p       | 1 |
| <i>circPDE4B</i> | miR-2054                  | 1 |
| <i>circPDE4B</i> | miR-20b-3p                | 1 |
| <i>circPDE4B</i> | miR-21-3p/3591-3p         | 1 |
| <i>circPDE4B</i> | miR-219b-5p               | 1 |
| <i>circPDE4B</i> | miR-221-3p/222-3p         | 1 |
| <i>circPDE4B</i> | miR-221-5p/8073           | 1 |
| <i>circPDE4B</i> | miR-2276-5p               | 2 |
| <i>circPDE4B</i> | miR-302b-5p/302d-5p       | 1 |
| <i>circPDE4B</i> | miR-302c-5p               | 1 |
| <i>circPDE4B</i> | miR-3074-5p               | 1 |
| <i>circPDE4B</i> | miR-3120-5p               | 1 |
| <i>circPDE4B</i> | miR-3137                  | 1 |
| <i>circPDE4B</i> | miR-3140-3p               | 1 |
| <i>circPDE4B</i> | miR-3143                  | 1 |
| <i>circPDE4B</i> | miR-3148                  | 2 |
| <i>circPDE4B</i> | miR-3152-3p               | 1 |
| <i>circPDE4B</i> | miR-3157-3p               | 1 |
| <i>circPDE4B</i> | miR-3157-5p               | 1 |
| <i>circPDE4B</i> | miR-3159                  | 1 |
| <i>circPDE4B</i> | miR-3165                  | 1 |
| <i>circPDE4B</i> | miR-3183/4723-3p/6769b-3p | 1 |
| <i>circPDE4B</i> | miR-3185                  | 1 |
| <i>circPDE4B</i> | miR-3190-3p               | 1 |
| <i>circPDE4B</i> | miR-3193                  | 1 |
| <i>circPDE4B</i> | miR-323-3p                | 1 |
| <i>circPDE4B</i> | miR-323a-5p               | 1 |
| <i>circPDE4B</i> | miR-34-5p/449-5p          | 1 |
| <i>circPDE4B</i> | miR-34a-3p                | 1 |
| <i>circPDE4B</i> | miR-34b-5p/449c-5p        | 1 |
| <i>circPDE4B</i> | miR-3613-5p               | 1 |



|                  |                  |   |
|------------------|------------------|---|
| <i>circPDE4B</i> | miR-3617-3p      | 1 |
| <i>circPDE4B</i> | miR-3653-5p      | 2 |
| <i>circPDE4B</i> | miR-3654         | 1 |
| <i>circPDE4B</i> | miR-3664-3p      | 1 |
| <i>circPDE4B</i> | miR-3664-5p      | 1 |
| <i>circPDE4B</i> | miR-3672/6864-3p | 1 |
| <i>circPDE4B</i> | miR-3690         | 1 |
| <i>circPDE4B</i> | miR-3691-3p      | 1 |
| <i>circPDE4B</i> | miR-370-3p       | 1 |
| <i>circPDE4B</i> | miR-3714         | 1 |
| <i>circPDE4B</i> | miR-374a-3p      | 1 |
| <i>circPDE4B</i> | miR-377-3p       | 1 |
| <i>circPDE4B</i> | miR-378a-5p      | 2 |
| <i>circPDE4B</i> | miR-3908         | 1 |
| <i>circPDE4B</i> | miR-3910         | 1 |
| <i>circPDE4B</i> | miR-3911         | 1 |
| <i>circPDE4B</i> | miR-3925-3p      | 1 |
| <i>circPDE4B</i> | miR-3942-5p      | 1 |
| <i>circPDE4B</i> | miR-3976         | 1 |
| <i>circPDE4B</i> | miR-3978         | 2 |
| <i>circPDE4B</i> | miR-412-5p       | 1 |
| <i>circPDE4B</i> | miR-4254         | 1 |
| <i>circPDE4B</i> | miR-4257         | 1 |
| <i>circPDE4B</i> | miR-4272         | 2 |
| <i>circPDE4B</i> | miR-4287/4685-3p | 2 |
| <i>circPDE4B</i> | miR-4294         | 1 |
| <i>circPDE4B</i> | miR-4302         | 1 |
| <i>circPDE4B</i> | miR-431-3p       | 1 |
| <i>circPDE4B</i> | miR-432-5p       | 1 |
| <i>circPDE4B</i> | miR-4324         | 1 |
| <i>circPDE4B</i> | miR-4328         | 1 |
| <i>circPDE4B</i> | miR-4433a-3p     | 1 |
| <i>circPDE4B</i> | miR-4433b-3p     | 1 |
| <i>circPDE4B</i> | miR-4459         | 1 |
| <i>circPDE4B</i> | miR-4469         | 2 |
| <i>circPDE4B</i> | miR-4484         | 1 |
| <i>circPDE4B</i> | miR-4511         | 1 |
| <i>circPDE4B</i> | miR-4524a-3p     | 1 |

|                  |                       |   |
|------------------|-----------------------|---|
| <i>circPDE4B</i> | miR-4524b-3p          | 2 |
| <i>circPDE4B</i> | miR-4528              | 2 |
| <i>circPDE4B</i> | miR-4536-5p           | 1 |
| <i>circPDE4B</i> | miR-455-3p.2          | 1 |
| <i>circPDE4B</i> | miR-4639-3p           | 1 |
| <i>circPDE4B</i> | miR-4645-3p           | 1 |
| <i>circPDE4B</i> | miR-4659a-3p/4659b-3p | 1 |
| <i>circPDE4B</i> | miR-4665-3p           | 1 |
| <i>circPDE4B</i> | miR-4691-3p           | 1 |
| <i>circPDE4B</i> | miR-4698              | 1 |
| <i>circPDE4B</i> | miR-4699-3p           | 2 |
| <i>circPDE4B</i> | miR-4713-5p           | 2 |
| <i>circPDE4B</i> | miR-4714-5p           | 1 |
| <i>circPDE4B</i> | miR-4733-5p           | 1 |
| <i>circPDE4B</i> | miR-4764-5p           | 1 |
| <i>circPDE4B</i> | miR-4766-3p           | 1 |
| <i>circPDE4B</i> | miR-4768-3p           | 1 |
| <i>circPDE4B</i> | miR-483-3p.1          | 2 |
| <i>circPDE4B</i> | miR-483-3p.2          | 2 |
| <i>circPDE4B</i> | miR-502-5p            | 1 |
| <i>circPDE4B</i> | miR-5093              | 1 |
| <i>circPDE4B</i> | miR-5096              | 1 |
| <i>circPDE4B</i> | miR-511-5p            | 1 |
| <i>circPDE4B</i> | miR-514a-5p           | 1 |
| <i>circPDE4B</i> | miR-515-5p/519e-5p    | 1 |
| <i>circPDE4B</i> | miR-525-5p            | 1 |
| <i>circPDE4B</i> | miR-543               | 1 |
| <i>circPDE4B</i> | miR-544b              | 1 |
| <i>circPDE4B</i> | miR-548an             | 1 |
| <i>circPDE4B</i> | miR-548au-3p          | 1 |
| <i>circPDE4B</i> | miR-548b-3p           | 1 |
| <i>circPDE4B</i> | miR-548v              | 1 |
| <i>circPDE4B</i> | miR-552-5p            | 1 |
| <i>circPDE4B</i> | miR-5692a             | 1 |
| <i>circPDE4B</i> | miR-5693              | 3 |
| <i>circPDE4B</i> | miR-5700              | 1 |
| <i>circPDE4B</i> | miR-582-5p            | 2 |
| <i>circPDE4B</i> | miR-595               | 1 |

|                  |                     |   |
|------------------|---------------------|---|
| <i>circPDE4B</i> | miR-607             | 1 |
| <i>circPDE4B</i> | miR-6077            | 4 |
| <i>circPDE4B</i> | miR-6079            | 2 |
| <i>circPDE4B</i> | miR-6124            | 2 |
| <i>circPDE4B</i> | miR-6128            | 2 |
| <i>circPDE4B</i> | miR-6134            | 1 |
| <i>circPDE4B</i> | miR-627-3p          | 1 |
| <i>circPDE4B</i> | miR-629-3p          | 1 |
| <i>circPDE4B</i> | miR-632/4288        | 1 |
| <i>circPDE4B</i> | miR-633             | 1 |
| <i>circPDE4B</i> | miR-642a-5p         | 2 |
| <i>circPDE4B</i> | miR-644a            | 1 |
| <i>circPDE4B</i> | miR-648             | 2 |
| <i>circPDE4B</i> | miR-6499-3p         | 1 |
| <i>circPDE4B</i> | miR-651-5p          | 1 |
| <i>circPDE4B</i> | miR-6513-3p         | 1 |
| <i>circPDE4B</i> | miR-654-3p          | 1 |
| <i>circPDE4B</i> | miR-661             | 3 |
| <i>circPDE4B</i> | miR-664a-5p/4794    | 1 |
| <i>circPDE4B</i> | miR-671-5p          | 1 |
| <i>circPDE4B</i> | miR-6733-3p         | 1 |
| <i>circPDE4B</i> | miR-6735-3p         | 3 |
| <i>circPDE4B</i> | miR-6755-3p         | 1 |
| <i>circPDE4B</i> | miR-676-5p          | 1 |
| <i>circPDE4B</i> | miR-6768-3p         | 1 |
| <i>circPDE4B</i> | miR-6794-3p         | 1 |
| <i>circPDE4B</i> | miR-6795-3p         | 1 |
| <i>circPDE4B</i> | miR-6814-5p         | 1 |
| <i>circPDE4B</i> | miR-6815-5p/6865-5p | 2 |
| <i>circPDE4B</i> | miR-6826-3p         | 1 |
| <i>circPDE4B</i> | miR-6828-5p         | 1 |
| <i>circPDE4B</i> | miR-6830-3p         | 1 |
| <i>circPDE4B</i> | miR-6832-3p         | 1 |
| <i>circPDE4B</i> | miR-6838-3p         | 1 |
| <i>circPDE4B</i> | miR-6841-3p         | 1 |
| <i>circPDE4B</i> | miR-6844            | 1 |
| <i>circPDE4B</i> | miR-6845-3p         | 1 |
| <i>circPDE4B</i> | miR-6847-5p         | 1 |

|                  |                         |   |
|------------------|-------------------------|---|
| <i>circPDE4B</i> | miR-6866-5p             | 1 |
| <i>circPDE4B</i> | miR-6867-3p             | 2 |
| <i>circPDE4B</i> | miR-6867-5p             | 1 |
| <i>circPDE4B</i> | miR-6875-3p             | 1 |
| <i>circPDE4B</i> | miR-6880-5p             | 1 |
| <i>circPDE4B</i> | miR-6884-3p             | 1 |
| <i>circPDE4B</i> | miR-6885-3p             | 1 |
| <i>circPDE4B</i> | miR-6886-3p             | 1 |
| <i>circPDE4B</i> | miR-6887-3p             | 1 |
| <i>circPDE4B</i> | miR-6888-3p             | 1 |
| <i>circPDE4B</i> | miR-6892-3p             | 2 |
| <i>circPDE4B</i> | miR-7-5p                | 4 |
| <i>circPDE4B</i> | miR-7113-3p             | 2 |
| <i>circPDE4B</i> | miR-7152-5p             | 1 |
| <i>circPDE4B</i> | miR-766-3p              | 1 |
| <i>circPDE4B</i> | miR-7706                | 1 |
| <i>circPDE4B</i> | miR-7854-3p             | 1 |
| <i>circPDE4B</i> | miR-8055                | 1 |
| <i>circPDE4B</i> | miR-8063                | 1 |
| <i>circPDE4B</i> | miR-8065                | 1 |
| <i>circPDE4B</i> | miR-8071                | 1 |
| <i>circPDE4B</i> | miR-874-3p              | 1 |
| <i>circPDE4B</i> | miR-875-3p              | 1 |
| <i>circPDE4B</i> | miR-876-3p              | 1 |
| <i>circPDE4B</i> | miR-876-5p              | 1 |
| <i>circPDE4B</i> | miR-877-5p              | 1 |
| <i>circPDE4B</i> | miR-888-5p              | 1 |
| <i>circPDE4B</i> | miR-938                 | 1 |
| <i>circPDE4B</i> | miR-940/6808-5p/6893-5p | 1 |
| <i>circPDE4B</i> | miR-1179                | 1 |
| <i>circPDE4B</i> | miR-1207-3p             | 1 |
| <i>circPDE4B</i> | miR-1229-3p             | 1 |
| <i>circPDE4B</i> | miR-1250-3p             | 2 |
| <i>circPDE4B</i> | miR-1252-3p             | 1 |
| <i>circPDE4B</i> | miR-1253                | 1 |
| <i>circPDE4B</i> | miR-1261                | 1 |
| <i>circPDE4B</i> | miR-1269                | 3 |
| <i>circPDE4B</i> | miR-1270                | 1 |

|                  |                                      |   |
|------------------|--------------------------------------|---|
| <i>circPDE4B</i> | miR-1278                             | 2 |
| <i>circPDE4B</i> | miR-1299                             | 1 |
| <i>circPDE4B</i> | miR-134-3p                           | 1 |
| <i>circPDE4B</i> | miR-134-5p                           | 1 |
| <i>circPDE4B</i> | miR-136-3p                           | 1 |
| <i>circPDE4B</i> | miR-145-5p                           | 3 |
| <i>circPDE4B</i> | miR-1468-3p                          | 1 |
| <i>circPDE4B</i> | miR-15-5p/16-5p/195-5p/424-5p/497-5p | 1 |
| <i>circPDE4B</i> | miR-15a-3p                           | 2 |
| <i>circPDE4B</i> | miR-16-1-3p                          | 1 |
| <i>circPDE4B</i> | miR-18-5p                            | 2 |
| <i>circPDE4B</i> | miR-181a-2-3p                        | 3 |
| <i>circPDE4B</i> | miR-182-5p                           | 2 |
| <i>circPDE4B</i> | miR-1825                             | 3 |
| <i>circPDE4B</i> | miR-183-3p                           | 2 |
| <i>circPDE4B</i> | miR-183-5p.2                         | 2 |
| <i>circPDE4B</i> | miR-191-3p                           | 1 |
| <i>circPDE4B</i> | miR-1915-3p/6764-5p                  | 2 |
| <i>circPDE4B</i> | miR-199-5p                           | 3 |
| <i>circPDE4B</i> | miR-203a-3p.1                        | 1 |
| <i>circPDE4B</i> | miR-208-3p                           | 1 |
| <i>circPDE4B</i> | miR-211-3p                           | 1 |
| <i>circPDE4B</i> | miR-2110                             | 7 |
| <i>circPDE4B</i> | miR-222-5p                           | 1 |
| <i>circPDE4B</i> | miR-223-3p                           | 1 |
| <i>circPDE4B</i> | miR-224-5p                           | 2 |
| <i>circPDE4B</i> | miR-2467-5p                          | 1 |
| <i>circPDE4B</i> | miR-26-5p                            | 1 |
| <i>circPDE4B</i> | miR-27b-5p                           | 2 |
| <i>circPDE4B</i> | miR-28-3p                            | 2 |
| <i>circPDE4B</i> | miR-3064-5p                          | 1 |
| <i>circPDE4B</i> | miR-31-5p                            | 1 |
| <i>circPDE4B</i> | miR-3121-5p                          | 1 |
| <i>circPDE4B</i> | miR-3123                             | 2 |
| <i>circPDE4B</i> | miR-3128                             | 1 |
| <i>circPDE4B</i> | miR-3138                             | 3 |
| <i>circPDE4B</i> | miR-3140-5p                          | 2 |
| <i>circPDE4B</i> | miR-3144-5p                          | 1 |

|                  |                     |   |
|------------------|---------------------|---|
| <i>circPDE4B</i> | miR-3150a-3p        | 7 |
| <i>circPDE4B</i> | miR-3151-3p         | 1 |
| <i>circPDE4B</i> | miR-3160-3p         | 3 |
| <i>circPDE4B</i> | miR-3163            | 1 |
| <i>circPDE4B</i> | miR-3164            | 1 |
| <i>circPDE4B</i> | miR-3169            | 1 |
| <i>circPDE4B</i> | miR-3171            | 1 |
| <i>circPDE4B</i> | miR-3173-3p/6891-5p | 1 |
| <i>circPDE4B</i> | miR-3176/3922-3p    | 3 |
| <i>circPDE4B</i> | miR-3179            | 3 |
| <i>circPDE4B</i> | miR-3188            | 1 |
| <i>circPDE4B</i> | miR-3190-5p         | 3 |
| <i>circPDE4B</i> | miR-3191-3p         | 1 |
| <i>circPDE4B</i> | miR-3191-5p         | 1 |
| <i>circPDE4B</i> | miR-3192-3p         | 1 |
| <i>circPDE4B</i> | miR-32-3p           | 2 |
| <i>circPDE4B</i> | miR-3201/4791       | 2 |
| <i>circPDE4B</i> | miR-3202            | 3 |
| <i>circPDE4B</i> | miR-320e            | 1 |
| <i>circPDE4B</i> | miR-326             | 1 |
| <i>circPDE4B</i> | miR-330-3p          | 1 |
| <i>circPDE4B</i> | miR-330-3p.2        | 1 |
| <i>circPDE4B</i> | miR-335-5p          | 2 |
| <i>circPDE4B</i> | miR-342-3p          | 2 |
| <i>circPDE4B</i> | miR-345-3p          | 2 |
| <i>circPDE4B</i> | miR-345-5p          | 1 |
| <i>circPDE4B</i> | miR-3606-5p         | 1 |
| <i>circPDE4B</i> | miR-3612            | 1 |
| <i>circPDE4B</i> | miR-3646            | 1 |
| <i>circPDE4B</i> | miR-3649            | 1 |
| <i>circPDE4B</i> | miR-3680-3p         | 1 |
| <i>circPDE4B</i> | miR-3680-5p         | 1 |
| <i>circPDE4B</i> | miR-3681-5p         | 3 |
| <i>circPDE4B</i> | miR-3686            | 1 |
| <i>circPDE4B</i> | miR-3692-3p         | 2 |
| <i>circPDE4B</i> | miR-376-3p          | 1 |
| <i>circPDE4B</i> | miR-376a-2-5p       | 2 |
| <i>circPDE4B</i> | miR-376a-5p         | 2 |

|                  |                           |   |
|------------------|---------------------------|---|
| <i>circPDE4B</i> | miR-376b-5p/376c-5p       | 1 |
| <i>circPDE4B</i> | miR-378g                  | 1 |
| <i>circPDE4B</i> | miR-378j/6839-5p          | 1 |
| <i>circPDE4B</i> | miR-380-5p/563            | 1 |
| <i>circPDE4B</i> | miR-382-5p                | 1 |
| <i>circPDE4B</i> | miR-3913-3p               | 1 |
| <i>circPDE4B</i> | miR-3925-5p               | 2 |
| <i>circPDE4B</i> | miR-3929/4419b/4478       | 1 |
| <i>circPDE4B</i> | miR-3938                  | 1 |
| <i>circPDE4B</i> | miR-3940-5p/4507          | 1 |
| <i>circPDE4B</i> | miR-3941                  | 1 |
| <i>circPDE4B</i> | miR-3975                  | 1 |
| <i>circPDE4B</i> | miR-410-3p                | 1 |
| <i>circPDE4B</i> | miR-4265/4296/4322        | 1 |
| <i>circPDE4B</i> | miR-4271/4725-3p/6780b-5p | 3 |
| <i>circPDE4B</i> | miR-4282                  | 2 |
| <i>circPDE4B</i> | miR-433-3p                | 2 |
| <i>circPDE4B</i> | miR-4422                  | 1 |
| <i>circPDE4B</i> | miR-4424                  | 1 |
| <i>circPDE4B</i> | miR-4427                  | 2 |
| <i>circPDE4B</i> | miR-4428                  | 1 |
| <i>circPDE4B</i> | miR-4450                  | 3 |
| <i>circPDE4B</i> | miR-4452                  | 2 |
| <i>circPDE4B</i> | miR-4453/4538             | 2 |
| <i>circPDE4B</i> | miR-4464/4748             | 1 |
| <i>circPDE4B</i> | miR-4470                  | 1 |
| <i>circPDE4B</i> | miR-4485-3p               | 1 |
| <i>circPDE4B</i> | miR-4486                  | 1 |
| <i>circPDE4B</i> | miR-4487                  | 3 |
| <i>circPDE4B</i> | miR-4496                  | 4 |
| <i>circPDE4B</i> | miR-449b-3p               | 1 |
| <i>circPDE4B</i> | miR-4504                  | 2 |
| <i>circPDE4B</i> | miR-450b-5p               | 1 |
| <i>circPDE4B</i> | miR-4512                  | 3 |
| <i>circPDE4B</i> | miR-4522                  | 2 |
| <i>circPDE4B</i> | miR-4524-5p               | 1 |
| <i>circPDE4B</i> | miR-4529-5p               | 2 |
| <i>circPDE4B</i> | miR-4531                  | 1 |

|                  |                             |   |
|------------------|-----------------------------|---|
| <i>circPDE4B</i> | miR-4533                    | 3 |
| <i>circPDE4B</i> | miR-4635                    | 2 |
| <i>circPDE4B</i> | miR-4640-5p                 | 3 |
| <i>circPDE4B</i> | miR-4643                    | 1 |
| <i>circPDE4B</i> | miR-4652-5p                 | 1 |
| <i>circPDE4B</i> | miR-4653-3p                 | 1 |
| <i>circPDE4B</i> | miR-4660                    | 1 |
| <i>circPDE4B</i> | miR-4661-5p                 | 1 |
| <i>circPDE4B</i> | miR-4667-5p/4700-5p/8089    | 7 |
| <i>circPDE4B</i> | miR-4670-3p                 | 1 |
| <i>circPDE4B</i> | miR-4672                    | 1 |
| <i>circPDE4B</i> | miR-4680-3p                 | 2 |
| <i>circPDE4B</i> | miR-4687-3p                 | 1 |
| <i>circPDE4B</i> | miR-4690-3p/5685            | 3 |
| <i>circPDE4B</i> | miR-4695-5p                 | 1 |
| <i>circPDE4B</i> | miR-4697-3p                 | 1 |
| <i>circPDE4B</i> | miR-4700-3p                 | 2 |
| <i>circPDE4B</i> | miR-4705                    | 1 |
| <i>circPDE4B</i> | miR-4708-3p                 | 1 |
| <i>circPDE4B</i> | miR-4713-3p                 | 3 |
| <i>circPDE4B</i> | miR-4720-5p/4799-3p/5588-5p | 1 |
| <i>circPDE4B</i> | miR-4726-3p                 | 2 |
| <i>circPDE4B</i> | miR-4731-5p                 | 1 |
| <i>circPDE4B</i> | miR-4732-5p                 | 1 |
| <i>circPDE4B</i> | miR-4738-5p                 | 3 |
| <i>circPDE4B</i> | miR-4747-5p/5196-5p         | 3 |
| <i>circPDE4B</i> | miR-4759                    | 1 |
| <i>circPDE4B</i> | miR-4760-5p/8061            | 1 |
| <i>circPDE4B</i> | miR-4779                    | 1 |
| <i>circPDE4B</i> | miR-4782-5p/5706            | 1 |
| <i>circPDE4B</i> | miR-4789-3p                 | 1 |
| <i>circPDE4B</i> | miR-4790-5p                 | 1 |
| <i>circPDE4B</i> | miR-4798-3p                 | 1 |
| <i>circPDE4B</i> | miR-4800-5p                 | 3 |
| <i>circPDE4B</i> | miR-485-5p                  | 1 |
| <i>circPDE4B</i> | miR-488-3p                  | 2 |
| <i>circPDE4B</i> | miR-492                     | 2 |
| <i>circPDE4B</i> | miR-493-3p                  | 1 |



|                  |                                      |   |
|------------------|--------------------------------------|---|
| <i>circPDE4B</i> | miR-495-5p                           | 1 |
| <i>circPDE4B</i> | miR-499a-3p/499b-3p                  | 2 |
| <i>circPDE4B</i> | miR-499a-5p                          | 1 |
| <i>circPDE4B</i> | miR-5000-3p                          | 1 |
| <i>circPDE4B</i> | miR-5002-5p                          | 2 |
| <i>circPDE4B</i> | miR-5008-3p/6737-3p/7157-3p          | 1 |
| <i>circPDE4B</i> | miR-5009-5p/8058                     | 3 |
| <i>circPDE4B</i> | miR-5011-5p                          | 2 |
| <i>circPDE4B</i> | miR-503-3p                           | 2 |
| <i>circPDE4B</i> | miR-503-5p                           | 1 |
| <i>circPDE4B</i> | miR-505-5p                           | 3 |
| <i>circPDE4B</i> | miR-507/557                          | 1 |
| <i>circPDE4B</i> | miR-5087                             | 1 |
| <i>circPDE4B</i> | miR-510-3p                           | 2 |
| <i>circPDE4B</i> | miR-510-5p                           | 3 |
| <i>circPDE4B</i> | miR-513b-5p                          | 1 |
| <i>circPDE4B</i> | miR-516a-5p                          | 1 |
| <i>circPDE4B</i> | miR-516b-5p                          | 1 |
| <i>circPDE4B</i> | miR-5187-3p                          | 2 |
| <i>circPDE4B</i> | miR-518c-5p                          | 1 |
| <i>circPDE4B</i> | miR-5190                             | 2 |
| <i>circPDE4B</i> | miR-5197-3p                          | 1 |
| <i>circPDE4B</i> | miR-539-5p                           | 1 |
| <i>circPDE4B</i> | miR-542-3p                           | 2 |
| <i>circPDE4B</i> | miR-548aj-5p/548f-5p/548g-5p/548x-5p | 1 |
| <i>circPDE4B</i> | miR-548ao-5p/548ax                   | 3 |
| <i>circPDE4B</i> | miR-548c-3p                          | 2 |
| <i>circPDE4B</i> | miR-548e-5p                          | 1 |
| <i>circPDE4B</i> | miR-548m                             | 2 |
| <i>circPDE4B</i> | miR-550b-2-5p                        | 1 |
| <i>circPDE4B</i> | miR-558                              | 3 |
| <i>circPDE4B</i> | miR-5580-5p                          | 5 |
| <i>circPDE4B</i> | miR-5585-5p                          | 3 |
| <i>circPDE4B</i> | miR-5586-5p                          | 3 |
| <i>circPDE4B</i> | miR-5589-5p                          | 1 |
| <i>circPDE4B</i> | miR-564                              | 2 |
| <i>circPDE4B</i> | miR-5680                             | 1 |
| <i>circPDE4B</i> | miR-5681a                            | 6 |

|                  |                                      |   |
|------------------|--------------------------------------|---|
| <i>circPDE4B</i> | miR-5681b                            | 2 |
| <i>circPDE4B</i> | miR-5697                             | 1 |
| <i>circPDE4B</i> | miR-573/3616-5p                      | 4 |
| <i>circPDE4B</i> | miR-576-3p                           | 1 |
| <i>circPDE4B</i> | miR-581                              | 1 |
| <i>circPDE4B</i> | miR-600                              | 1 |
| <i>circPDE4B</i> | miR-6074                             | 1 |
| <i>circPDE4B</i> | miR-612/1285-3p/3187-5p/5189-5p/6860 | 1 |
| <i>circPDE4B</i> | miR-6125                             | 3 |
| <i>circPDE4B</i> | miR-6126                             | 1 |
| <i>circPDE4B</i> | miR-619-3p                           | 4 |
| <i>circPDE4B</i> | miR-624-5p                           | 3 |
| <i>circPDE4B</i> | miR-626/6876-3p                      | 1 |
| <i>circPDE4B</i> | miR-630                              | 2 |
| <i>circPDE4B</i> | miR-631/3661                         | 4 |
| <i>circPDE4B</i> | miR-634                              | 3 |
| <i>circPDE4B</i> | miR-637                              | 7 |
| <i>circPDE4B</i> | miR-638                              | 3 |
| <i>circPDE4B</i> | miR-639                              | 1 |
| <i>circPDE4B</i> | miR-641/3617-5p                      | 1 |
| <i>circPDE4B</i> | miR-646                              | 1 |
| <i>circPDE4B</i> | miR-647                              | 1 |
| <i>circPDE4B</i> | miR-6508-3p                          | 3 |
| <i>circPDE4B</i> | miR-651-3p                           | 2 |
| <i>circPDE4B</i> | miR-659-5p                           | 2 |
| <i>circPDE4B</i> | miR-664a-3p                          | 2 |
| <i>circPDE4B</i> | miR-6715b-3p                         | 1 |
| <i>circPDE4B</i> | miR-6728-3p                          | 1 |
| <i>circPDE4B</i> | miR-6730-5p                          | 6 |
| <i>circPDE4B</i> | miR-6742-3p                          | 7 |
| <i>circPDE4B</i> | miR-6748-5p                          | 1 |
| <i>circPDE4B</i> | miR-6755-5p                          | 2 |
| <i>circPDE4B</i> | miR-6759-5p                          | 1 |
| <i>circPDE4B</i> | miR-6764-3p/6824-3p                  | 1 |
| <i>circPDE4B</i> | miR-6770-5p                          | 1 |
| <i>circPDE4B</i> | miR-6785-3p                          | 2 |
| <i>circPDE4B</i> | miR-6790-3p                          | 1 |
| <i>circPDE4B</i> | miR-6792-5p                          | 1 |

|                  |             |   |
|------------------|-------------|---|
| <i>circPDE4B</i> | miR-6793-5p | 1 |
| <i>circPDE4B</i> | miR-6796-5p | 1 |
| <i>circPDE4B</i> | miR-6800-3p | 1 |
| <i>circPDE4B</i> | miR-6809-5p | 1 |
| <i>circPDE4B</i> | miR-6810-5p | 7 |
| <i>circPDE4B</i> | miR-6816-3p | 1 |
| <i>circPDE4B</i> | miR-6817-3p | 1 |
| <i>circPDE4B</i> | miR-6821-3p | 1 |
| <i>circPDE4B</i> | miR-6830-5p | 1 |
| <i>circPDE4B</i> | miR-6832-5p | 1 |
| <i>circPDE4B</i> | miR-6839-3p | 1 |
| <i>circPDE4B</i> | miR-6840-3p | 2 |
| <i>circPDE4B</i> | miR-6841-5p | 2 |
| <i>circPDE4B</i> | miR-6842-3p | 1 |
| <i>circPDE4B</i> | miR-6849-3p | 3 |
| <i>circPDE4B</i> | miR-6852-5p | 7 |
| <i>circPDE4B</i> | miR-6857-5p | 7 |
| <i>circPDE4B</i> | miR-6861-3p | 2 |
| <i>circPDE4B</i> | miR-6864-5p | 1 |
| <i>circPDE4B</i> | miR-6868-5p | 1 |
| <i>circPDE4B</i> | miR-6878-3p | 3 |
| <i>circPDE4B</i> | miR-6880-3p | 1 |
| <i>circPDE4B</i> | miR-6882-5p | 1 |
| <i>circPDE4B</i> | miR-6889-3p | 1 |
| <i>circPDE4B</i> | miR-6895-5p | 3 |
| <i>circPDE4B</i> | miR-7110-3p | 1 |
| <i>circPDE4B</i> | miR-7153-3p | 1 |
| <i>circPDE4B</i> | miR-7154-5p | 2 |
| <i>circPDE4B</i> | miR-7155-5p | 7 |
| <i>circPDE4B</i> | miR-7160-3p | 3 |
| <i>circPDE4B</i> | miR-744-3p  | 1 |
| <i>circPDE4B</i> | miR-7515    | 3 |
| <i>circPDE4B</i> | miR-758-5p  | 1 |
| <i>circPDE4B</i> | miR-7641    | 1 |
| <i>circPDE4B</i> | miR-7846-3p | 3 |
| <i>circPDE4B</i> | miR-7849-3p | 2 |
| <i>circPDE4B</i> | miR-7851-3p | 4 |
| <i>circPDE4B</i> | miR-7855-5p | 1 |

|                  |                       |   |
|------------------|-----------------------|---|
| <i>circPDE4B</i> | miR-7974              | 1 |
| <i>circPDE4B</i> | miR-8060              | 1 |
| <i>circPDE4B</i> | miR-8068              | 1 |
| <i>circPDE4B</i> | miR-8080              | 1 |
| <i>circPDE4B</i> | miR-8083              | 1 |
| <i>circPDE4B</i> | miR-873-5p.1          | 2 |
| <i>circPDE4B</i> | miR-885-5p            | 1 |
| <i>circPDE4B</i> | miR-9-5p              | 1 |
| <i>circPDE4B</i> | miR-921               | 1 |
| <i>circPDE4B</i> | miR-939-3p            | 7 |
| <i>circPDE4B</i> | miR-96-5p/1271-5p     | 2 |
| <i>circPDE8A</i> | let-7a-2-3p/let-7g-3p | 2 |
| <i>circPDE8A</i> | let-7c-3p             | 2 |
| <i>circPDE8A</i> | miR-10-5p             | 3 |
| <i>circPDE8A</i> | miR-1183              | 2 |
| <i>circPDE8A</i> | miR-1184              | 2 |
| <i>circPDE8A</i> | miR-1185-5p           | 2 |
| <i>circPDE8A</i> | miR-1197              | 2 |
| <i>circPDE8A</i> | miR-1199-5p/6751-3p   | 2 |
| <i>circPDE8A</i> | miR-1205              | 2 |
| <i>circPDE8A</i> | miR-1207-3p           | 3 |
| <i>circPDE8A</i> | miR-1225-3p           | 2 |
| <i>circPDE8A</i> | miR-1227-5p           | 1 |
| <i>circPDE8A</i> | miR-124-5p            | 2 |
| <i>circPDE8A</i> | miR-1263              | 1 |
| <i>circPDE8A</i> | miR-1272              | 5 |
| <i>circPDE8A</i> | miR-1273h-3p          | 2 |
| <i>circPDE8A</i> | miR-128-1-5p          | 1 |
| <i>circPDE8A</i> | miR-128-3p            | 2 |
| <i>circPDE8A</i> | miR-1284              | 2 |
| <i>circPDE8A</i> | miR-1285-5p           | 1 |
| <i>circPDE8A</i> | miR-1290              | 2 |
| <i>circPDE8A</i> | miR-1322              | 5 |
| <i>circPDE8A</i> | miR-141-3p/200-3p     | 1 |
| <i>circPDE8A</i> | miR-146b-3p           | 4 |
| <i>circPDE8A</i> | miR-148-3p/152-3p     | 2 |
| <i>circPDE8A</i> | miR-150-3p            | 1 |
| <i>circPDE8A</i> | miR-151-5p            | 2 |

|                  |                           |   |
|------------------|---------------------------|---|
| <i>circPDE8A</i> | miR-17-3p                 | 2 |
| <i>circPDE8A</i> | miR-196b-3p               | 2 |
| <i>circPDE8A</i> | miR-198                   | 2 |
| <i>circPDE8A</i> | miR-20a-3p                | 2 |
| <i>circPDE8A</i> | miR-211-3p                | 2 |
| <i>circPDE8A</i> | miR-2114-3p               | 2 |
| <i>circPDE8A</i> | miR-212-5p                | 3 |
| <i>circPDE8A</i> | miR-216a-5p               | 1 |
| <i>circPDE8A</i> | miR-216b-3p               | 2 |
| <i>circPDE8A</i> | miR-216b-5p               | 1 |
| <i>circPDE8A</i> | miR-217                   | 2 |
| <i>circPDE8A</i> | miR-2277-3p               | 2 |
| <i>circPDE8A</i> | miR-23-3p                 | 2 |
| <i>circPDE8A</i> | miR-2355-3p               | 2 |
| <i>circPDE8A</i> | miR-2682-3p/6781-3p       | 2 |
| <i>circPDE8A</i> | miR-298                   | 3 |
| <i>circPDE8A</i> | miR-30-5p                 | 1 |
| <i>circPDE8A</i> | miR-302a-5p               | 2 |
| <i>circPDE8A</i> | miR-31-5p                 | 2 |
| <i>circPDE8A</i> | miR-3130-3p               | 3 |
| <i>circPDE8A</i> | miR-3140-3p               | 2 |
| <i>circPDE8A</i> | miR-3140-5p               | 2 |
| <i>circPDE8A</i> | miR-3157-3p               | 2 |
| <i>circPDE8A</i> | miR-3158-5p               | 2 |
| <i>circPDE8A</i> | miR-3159                  | 2 |
| <i>circPDE8A</i> | miR-3161                  | 6 |
| <i>circPDE8A</i> | miR-3173-5p               | 4 |
| <i>circPDE8A</i> | miR-3189-3p               | 3 |
| <i>circPDE8A</i> | miR-324-5p                | 2 |
| <i>circPDE8A</i> | miR-335-3p                | 2 |
| <i>circPDE8A</i> | miR-33b-3p/515-3p/519e-3p | 2 |
| <i>circPDE8A</i> | miR-345-3p                | 2 |
| <i>circPDE8A</i> | miR-3605-5p               | 2 |
| <i>circPDE8A</i> | miR-3675-5p               | 2 |
| <i>circPDE8A</i> | miR-3678-3p               | 2 |
| <i>circPDE8A</i> | miR-3682-3p               | 3 |
| <i>circPDE8A</i> | miR-370-3p                | 2 |
| <i>circPDE8A</i> | miR-371a-3p               | 2 |

|                  |                          |   |
|------------------|--------------------------|---|
| <i>circPDE8A</i> | miR-371b-3p              | 2 |
| <i>circPDE8A</i> | miR-382-5p               | 1 |
| <i>circPDE8A</i> | miR-3912-5p              | 2 |
| <i>circPDE8A</i> | miR-3926                 | 2 |
| <i>circPDE8A</i> | miR-4261                 | 2 |
| <i>circPDE8A</i> | miR-4267                 | 3 |
| <i>circPDE8A</i> | miR-4269/6715b-5p        | 4 |
| <i>circPDE8A</i> | miR-4293                 | 2 |
| <i>circPDE8A</i> | miR-4307                 | 2 |
| <i>circPDE8A</i> | miR-4324                 | 2 |
| <i>circPDE8A</i> | miR-433-3p               | 2 |
| <i>circPDE8A</i> | miR-4438                 | 5 |
| <i>circPDE8A</i> | miR-4496                 | 2 |
| <i>circPDE8A</i> | miR-4514/4692            | 4 |
| <i>circPDE8A</i> | miR-4640-5p              | 1 |
| <i>circPDE8A</i> | miR-4646-3p              | 2 |
| <i>circPDE8A</i> | miR-4652-3p              | 5 |
| <i>circPDE8A</i> | miR-4670-3p              | 1 |
| <i>circPDE8A</i> | miR-4704-5p              | 1 |
| <i>circPDE8A</i> | miR-4708-3p              | 2 |
| <i>circPDE8A</i> | miR-4717-3p              | 2 |
| <i>circPDE8A</i> | miR-4742-5p              | 4 |
| <i>circPDE8A</i> | miR-4743-3p              | 5 |
| <i>circPDE8A</i> | miR-4778-3p              | 2 |
| <i>circPDE8A</i> | miR-4793-3p              | 3 |
| <i>circPDE8A</i> | miR-4796-5p              | 2 |
| <i>circPDE8A</i> | miR-487a-5p/487b-5p      | 2 |
| <i>circPDE8A</i> | miR-493-5p               | 2 |
| <i>circPDE8A</i> | miR-494-3p               | 3 |
| <i>circPDE8A</i> | miR-495-5p               | 1 |
| <i>circPDE8A</i> | miR-502-5p               | 3 |
| <i>circPDE8A</i> | miR-504-5p.1             | 3 |
| <i>circPDE8A</i> | miR-509-3-5p/509-5p/4418 | 2 |
| <i>circPDE8A</i> | miR-5096                 | 2 |
| <i>circPDE8A</i> | miR-513b-3p              | 2 |
| <i>circPDE8A</i> | miR-5193                 | 3 |
| <i>circPDE8A</i> | miR-526b-5p              | 1 |
| <i>circPDE8A</i> | miR-544b                 | 2 |

|                  |                                                                  |   |
|------------------|------------------------------------------------------------------|---|
| <i>circPDE8A</i> | miR-548av-3p                                                     | 3 |
| <i>circPDE8A</i> | miR-548av-5p/548k/8054                                           | 1 |
| <i>circPDE8A</i> | miR-548ay-5p/548au-5p/548as-5p/548ar-5p/548aq-5p/548ap-5p/548am- |   |
| <i>circPDE8A</i> | miR-548az-5p/548t-5p                                             | 3 |
| <i>circPDE8A</i> | miR-548l                                                         | 1 |
| <i>circPDE8A</i> | miR-548n                                                         | 3 |
| <i>circPDE8A</i> | miR-550a-3-5p/550a-5p/1271-3p                                    | 2 |
| <i>circPDE8A</i> | miR-5586-5p                                                      | 3 |
| <i>circPDE8A</i> | miR-573/3616-5p                                                  | 1 |
| <i>circPDE8A</i> | miR-596                                                          | 2 |
| <i>circPDE8A</i> | miR-601                                                          | 3 |
| <i>circPDE8A</i> | miR-611/3131                                                     | 2 |
| <i>circPDE8A</i> | miR-624-5p                                                       | 1 |
| <i>circPDE8A</i> | miR-626/6876-3p                                                  | 2 |
| <i>circPDE8A</i> | miR-6504-3p                                                      | 4 |
| <i>circPDE8A</i> | miR-6508-3p                                                      | 1 |
| <i>circPDE8A</i> | miR-659-3p                                                       | 2 |
| <i>circPDE8A</i> | miR-660-3p                                                       | 3 |
| <i>circPDE8A</i> | miR-6720-5p                                                      | 7 |
| <i>circPDE8A</i> | miR-6728-3p                                                      | 2 |
| <i>circPDE8A</i> | miR-6732-3p                                                      | 2 |
| <i>circPDE8A</i> | miR-6752-3p                                                      | 5 |
| <i>circPDE8A</i> | miR-6762-5p/6845-5p                                              | 1 |
| <i>circPDE8A</i> | miR-6771-3p                                                      | 2 |
| <i>circPDE8A</i> | miR-6778-3p                                                      | 6 |
| <i>circPDE8A</i> | miR-6791-3p/6829-3p                                              | 6 |
| <i>circPDE8A</i> | miR-6807-5p                                                      | 2 |
| <i>circPDE8A</i> | miR-6809-5p                                                      | 2 |
| <i>circPDE8A</i> | miR-6816-3p                                                      | 2 |
| <i>circPDE8A</i> | miR-6819-3p/6877-3p                                              | 5 |
| <i>circPDE8A</i> | miR-6830-5p                                                      | 2 |
| <i>circPDE8A</i> | miR-6836-3p                                                      | 2 |
| <i>circPDE8A</i> | miR-6843-3p/6848-3p                                              | 2 |
| <i>circPDE8A</i> | miR-6844                                                         | 2 |
| <i>circPDE8A</i> | miR-6856-3p                                                      | 2 |
| <i>circPDE8A</i> | miR-6890-5p                                                      | 2 |
| <i>circPDE8A</i> | miR-7114-5p                                                      | 4 |
| <i>circPDE8A</i> | miR-7151-5p                                                      | 2 |

|                  |                           |    |
|------------------|---------------------------|----|
| <i>circPDE8A</i> | miR-7154-5p               | 2  |
| <i>circPDE8A</i> | miR-7641                  | 3  |
| <i>circPDE8A</i> | miR-7976                  | 4  |
| <i>circPDE8A</i> | miR-8068                  | 2  |
| <i>circPDE8A</i> | miR-8080                  | 2  |
| <i>circPDE8A</i> | miR-873-5p.1              | 2  |
| <i>circPDE8A</i> | miR-874-3p                | 2  |
| <i>circPDE8A</i> | miR-876-5p                | 2  |
| <i>circPDE8A</i> | miR-885-5p                | 2  |
| <i>circPDE8A</i> | miR-9-5p                  | 2  |
| <i>circPDE8A</i> | miR-1206                  | 1  |
| <i>circPDE8A</i> | miR-1236-3p               | 1  |
| <i>circPDE8A</i> | miR-124-3p.1              | 1  |
| <i>circPDE8A</i> | miR-1252-3p               | 1  |
| <i>circPDE8A</i> | miR-1256                  | 1  |
| <i>circPDE8A</i> | miR-1287-5p               | 4  |
| <i>circPDE8A</i> | miR-1539                  | 1  |
| <i>circPDE8A</i> | miR-15a-3p                | 1  |
| <i>circPDE8A</i> | miR-19-5p                 | 1  |
| <i>circPDE8A</i> | miR-193b-5p               | 1  |
| <i>circPDE8A</i> | miR-1972                  | 2  |
| <i>circPDE8A</i> | miR-203a-3p.1             | 1  |
| <i>circPDE8A</i> | miR-2052                  | 1  |
| <i>circPDE8A</i> | miR-214-3p/3619-5p        | 6  |
| <i>circPDE8A</i> | miR-30-3p                 | 2  |
| <i>circPDE8A</i> | miR-3065-5p               | 2  |
| <i>circPDE8A</i> | miR-3135b                 | 4  |
| <i>circPDE8A</i> | miR-3145-5p               | 1  |
| <i>circPDE8A</i> | miR-3147                  | 1  |
| <i>circPDE8A</i> | miR-3170/6855-5p          | 1  |
| <i>circPDE8A</i> | miR-3183/4723-3p/6769b-3p | 3  |
| <i>circPDE8A</i> | miR-3192-3p               | 1  |
| <i>circPDE8A</i> | miR-3200-5p               | 1  |
| <i>circPDE8A</i> | miR-338-3p                | 10 |
| <i>circPDE8A</i> | miR-338-5p                | 1  |
| <i>circPDE8A</i> | miR-3607-3p               | 1  |
| <i>circPDE8A</i> | miR-3646                  | 1  |
| <i>circPDE8A</i> | miR-3674                  | 1  |



|                  |                     |    |
|------------------|---------------------|----|
| <i>circPDE8A</i> | miR-3684            | 2  |
| <i>circPDE8A</i> | miR-3714            | 1  |
| <i>circPDE8A</i> | miR-3910            | 1  |
| <i>circPDE8A</i> | miR-3925-3p         | 8  |
| <i>circPDE8A</i> | miR-409-3p          | 1  |
| <i>circPDE8A</i> | miR-4251            | 2  |
| <i>circPDE8A</i> | miR-4260            | 1  |
| <i>circPDE8A</i> | miR-4274            | 4  |
| <i>circPDE8A</i> | miR-4277            | 3  |
| <i>circPDE8A</i> | miR-4289            | 2  |
| <i>circPDE8A</i> | miR-4303            | 1  |
| <i>circPDE8A</i> | miR-4318            | 3  |
| <i>circPDE8A</i> | miR-4329            | 2  |
| <i>circPDE8A</i> | miR-4425            | 1  |
| <i>circPDE8A</i> | miR-4468            | 2  |
| <i>circPDE8A</i> | miR-4484            | 2  |
| <i>circPDE8A</i> | miR-450a-2-3p       | 1  |
| <i>circPDE8A</i> | miR-4519            | 4  |
| <i>circPDE8A</i> | miR-4520-5p         | 1  |
| <i>circPDE8A</i> | miR-4524-5p         | 1  |
| <i>circPDE8A</i> | miR-4529-5p         | 1  |
| <i>circPDE8A</i> | miR-4530            | 10 |
| <i>circPDE8A</i> | miR-4650-5p         | 2  |
| <i>circPDE8A</i> | miR-4682            | 1  |
| <i>circPDE8A</i> | miR-4684-5p         | 1  |
| <i>circPDE8A</i> | miR-4690-5p         | 1  |
| <i>circPDE8A</i> | miR-4693-3p         | 1  |
| <i>circPDE8A</i> | miR-4717-5p         | 2  |
| <i>circPDE8A</i> | miR-4762-3p         | 1  |
| <i>circPDE8A</i> | miR-4768-5p/6833-3p | 2  |
| <i>circPDE8A</i> | miR-4777-3p         | 1  |
| <i>circPDE8A</i> | miR-4781-3p         | 1  |
| <i>circPDE8A</i> | miR-4788            | 1  |
| <i>circPDE8A</i> | miR-488-3p          | 2  |
| <i>circPDE8A</i> | miR-5000-5p         | 3  |
| <i>circPDE8A</i> | miR-508-5p          | 1  |
| <i>circPDE8A</i> | miR-5092            | 2  |
| <i>circPDE8A</i> | miR-515-5p/519e-5p  | 8  |

|                  |                             |   |
|------------------|-----------------------------|---|
| <i>circPDE8A</i> | miR-519d-5p                 | 1 |
| <i>circPDE8A</i> | miR-548an                   | 2 |
| <i>circPDE8A</i> | miR-549a                    | 1 |
| <i>circPDE8A</i> | miR-5572                    | 1 |
| <i>circPDE8A</i> | miR-5680                    | 1 |
| <i>circPDE8A</i> | miR-5681a                   | 1 |
| <i>circPDE8A</i> | miR-5695                    | 1 |
| <i>circPDE8A</i> | miR-605-5p                  | 1 |
| <i>circPDE8A</i> | miR-6081                    | 2 |
| <i>circPDE8A</i> | miR-6165                    | 1 |
| <i>circPDE8A</i> | miR-618                     | 1 |
| <i>circPDE8A</i> | miR-629-5p                  | 1 |
| <i>circPDE8A</i> | miR-631/3661                | 1 |
| <i>circPDE8A</i> | miR-643                     | 1 |
| <i>circPDE8A</i> | miR-6510-5p                 | 1 |
| <i>circPDE8A</i> | miR-6515-3p                 | 1 |
| <i>circPDE8A</i> | miR-6730-5p                 | 1 |
| <i>circPDE8A</i> | miR-6737-5p/6812-5p/6819-5p | 1 |
| <i>circPDE8A</i> | miR-6761-5p                 | 2 |
| <i>circPDE8A</i> | miR-6768-3p                 | 2 |
| <i>circPDE8A</i> | miR-6800-3p                 | 1 |
| <i>circPDE8A</i> | miR-6804-3p                 | 1 |
| <i>circPDE8A</i> | miR-6809-3p                 | 2 |
| <i>circPDE8A</i> | miR-6845-3p                 | 8 |
| <i>circPDE8A</i> | miR-6853-3p                 | 1 |
| <i>circPDE8A</i> | miR-6865-3p                 | 2 |
| <i>circPDE8A</i> | miR-6874-5p                 | 1 |
| <i>circPDE8A</i> | miR-758-3p                  | 1 |
| <i>circPDE8A</i> | miR-766-3p                  | 8 |
| <i>circPDE8A</i> | miR-8070                    | 1 |
| <i>circPDE8A</i> | miR-875-5p                  | 1 |
| <i>circPDE8A</i> | miR-892a                    | 3 |
| <i>circPDE8A</i> | miR-922                     | 6 |
| <i>circPDE8A</i> | miR-942-5p                  | 2 |
| <i>circPDE8A</i> | miR-95-5p                   | 1 |
| <i>circPDE8A</i> | miR-1-3p/206                | 3 |
| <i>circPDE8A</i> | miR-1-5p                    | 2 |
| <i>circPDE8A</i> | miR-101-3p.2                | 1 |

|                  |                     |   |
|------------------|---------------------|---|
| <i>circPDE8A</i> | miR-101-5p          | 1 |
| <i>circPDE8A</i> | miR-103-3p/107      | 3 |
| <i>circPDE8A</i> | miR-103a-2-5p       | 3 |
| <i>circPDE8A</i> | miR-1178-3p         | 1 |
| <i>circPDE8A</i> | miR-1178-5p         | 1 |
| <i>circPDE8A</i> | miR-1179            | 6 |
| <i>circPDE8A</i> | miR-1180-5p         | 1 |
| <i>circPDE8A</i> | miR-1182            | 1 |
| <i>circPDE8A</i> | miR-1193            | 2 |
| <i>circPDE8A</i> | miR-1200            | 3 |
| <i>circPDE8A</i> | miR-1207-5p/4763-3p | 1 |
| <i>circPDE8A</i> | miR-1208            | 1 |
| <i>circPDE8A</i> | miR-122-5p          | 4 |
| <i>circPDE8A</i> | miR-1224-3p         | 1 |
| <i>circPDE8A</i> | miR-1228-5p         | 1 |
| <i>circPDE8A</i> | miR-1229-3p         | 2 |
| <i>circPDE8A</i> | miR-1231            | 1 |
| <i>circPDE8A</i> | miR-1233-5p/6778-5p | 4 |
| <i>circPDE8A</i> | miR-1236-5p         | 3 |
| <i>circPDE8A</i> | miR-1237-3p         | 1 |
| <i>circPDE8A</i> | miR-1238-3p         | 4 |
| <i>circPDE8A</i> | miR-1238-5p/4758-5p | 5 |
| <i>circPDE8A</i> | miR-1243            | 1 |
| <i>circPDE8A</i> | miR-1244            | 1 |
| <i>circPDE8A</i> | miR-1245a/8079      | 5 |
| <i>circPDE8A</i> | miR-1245b-5p        | 2 |
| <i>circPDE8A</i> | miR-1248            | 1 |
| <i>circPDE8A</i> | miR-125-5p          | 4 |
| <i>circPDE8A</i> | miR-1250-3p         | 6 |
| <i>circPDE8A</i> | miR-1251-3p         | 1 |
| <i>circPDE8A</i> | miR-1251-5p         | 1 |
| <i>circPDE8A</i> | miR-1252-5p         | 2 |
| <i>circPDE8A</i> | miR-1254/3116       | 1 |
| <i>circPDE8A</i> | miR-1255b-2-3p      | 2 |
| <i>circPDE8A</i> | miR-1257            | 2 |
| <i>circPDE8A</i> | miR-125a-3p         | 2 |
| <i>circPDE8A</i> | miR-125b-1-3p       | 1 |
| <i>circPDE8A</i> | miR-125b-2-3p       | 1 |

|                  |                          |   |
|------------------|--------------------------|---|
| <i>circPDE8A</i> | miR-1260a/1260b          | 1 |
| <i>circPDE8A</i> | miR-1262/4701-3p/6736-5p | 3 |
| <i>circPDE8A</i> | miR-1266-3p              | 1 |
| <i>circPDE8A</i> | miR-1266-5p/4518         | 2 |
| <i>circPDE8A</i> | miR-1267                 | 2 |
| <i>circPDE8A</i> | miR-127-5p               | 2 |
| <i>circPDE8A</i> | miR-1270                 | 3 |
| <i>circPDE8A</i> | miR-1273e                | 3 |
| <i>circPDE8A</i> | miR-1273f                | 3 |
| <i>circPDE8A</i> | miR-1273g-3p             | 1 |
| <i>circPDE8A</i> | miR-1273g-5p             | 2 |
| <i>circPDE8A</i> | miR-1277-5p              | 4 |
| <i>circPDE8A</i> | miR-1278                 | 1 |
| <i>circPDE8A</i> | miR-1279                 | 3 |
| <i>circPDE8A</i> | miR-1281                 | 2 |
| <i>circPDE8A</i> | miR-1282                 | 1 |
| <i>circPDE8A</i> | miR-1289                 | 3 |
| <i>circPDE8A</i> | miR-129-3p               | 1 |
| <i>circPDE8A</i> | miR-129-5p               | 3 |
| <i>circPDE8A</i> | miR-1291/6775-3p         | 2 |
| <i>circPDE8A</i> | miR-1293/4483            | 3 |
| <i>circPDE8A</i> | miR-1295b-3p             | 4 |
| <i>circPDE8A</i> | miR-1296-3p              | 1 |
| <i>circPDE8A</i> | miR-1296-5p              | 4 |
| <i>circPDE8A</i> | miR-1298-3p              | 2 |
| <i>circPDE8A</i> | miR-1298-5p              | 3 |
| <i>circPDE8A</i> | miR-1299                 | 2 |
| <i>circPDE8A</i> | miR-130-3p/301-3p/454-3p | 2 |
| <i>circPDE8A</i> | miR-1301-3p              | 3 |
| <i>circPDE8A</i> | miR-1302/4298            | 6 |
| <i>circPDE8A</i> | miR-1304-3p              | 4 |
| <i>circPDE8A</i> | miR-1305                 | 1 |
| <i>circPDE8A</i> | miR-1306-5p              | 1 |
| <i>circPDE8A</i> | miR-132-3p/212-3p        | 1 |
| <i>circPDE8A</i> | miR-132-5p               | 3 |
| <i>circPDE8A</i> | miR-1324                 | 2 |
| <i>circPDE8A</i> | miR-133a-3p.1            | 1 |
| <i>circPDE8A</i> | miR-134-3p               | 3 |

|                  |                                     |   |
|------------------|-------------------------------------|---|
| <i>circPDE8A</i> | miR-134-5p                          | 1 |
| <i>circPDE8A</i> | miR-1343-3p                         | 5 |
| <i>circPDE8A</i> | miR-136-5p                          | 2 |
| <i>circPDE8A</i> | miR-137                             | 5 |
| <i>circPDE8A</i> | miR-139-3p                          | 3 |
| <i>circPDE8A</i> | miR-140-3p.1                        | 1 |
| <i>circPDE8A</i> | miR-140-5p                          | 2 |
| <i>circPDE8A</i> | miR-141-5p                          | 2 |
| <i>circPDE8A</i> | miR-142-3p.1                        | 1 |
| <i>circPDE8A</i> | miR-142-3p.2                        | 2 |
| <i>circPDE8A</i> | miR-143-3p                          | 3 |
| <i>circPDE8A</i> | miR-143-5p                          | 1 |
| <i>circPDE8A</i> | miR-145-3p                          | 6 |
| <i>circPDE8A</i> | miR-145-5p                          | 5 |
| <i>circPDE8A</i> | miR-146-5p                          | 1 |
| <i>circPDE8A</i> | miR-146a-3p                         | 1 |
| <i>circPDE8A</i> | miR-148b-5p/6874-3p                 | 1 |
| <i>circPDE8A</i> | miR-149-5p                          | 2 |
| <i>circPDE8A</i> | miR-150-5p                          | 3 |
| <i>circPDE8A</i> | miR-152-5p                          | 5 |
| <i>circPDE8A</i> | miR-153-3p                          | 1 |
| <i>circPDE8A</i> | miR-153-5p                          | 4 |
| <i>circPDE8A</i> | miR-1538/4745-3p                    | 3 |
| <i>circPDE8A</i> | miR-16-1-3p                         | 3 |
| <i>circPDE8A</i> | miR-17-5p/20-5p/93-5p/106-5p/519-3p | 2 |
| <i>circPDE8A</i> | miR-181-3p/4420                     | 2 |
| <i>circPDE8A</i> | miR-182-3p                          | 4 |
| <i>circPDE8A</i> | miR-182-5p                          | 2 |
| <i>circPDE8A</i> | miR-1825                            | 2 |
| <i>circPDE8A</i> | miR-185-3p                          | 4 |
| <i>circPDE8A</i> | miR-185-5p                          | 3 |
| <i>circPDE8A</i> | miR-186-5p                          | 4 |
| <i>circPDE8A</i> | miR-188-3p                          | 1 |
| <i>circPDE8A</i> | miR-18a-3p                          | 1 |
| <i>circPDE8A</i> | miR-1909-3p/6722-3p                 | 2 |
| <i>circPDE8A</i> | miR-1909-5p                         | 2 |
| <i>circPDE8A</i> | miR-1910-3p/6511a-5p                | 2 |
| <i>circPDE8A</i> | miR-1911-3p                         | 3 |

|                  |                     |   |
|------------------|---------------------|---|
| <i>circPDE8A</i> | miR-1914-5p         | 1 |
| <i>circPDE8A</i> | miR-1915-3p/6764-5p | 4 |
| <i>circPDE8A</i> | miR-192-3p          | 1 |
| <i>circPDE8A</i> | miR-192-5p/215-5p   | 1 |
| <i>circPDE8A</i> | miR-194-3p          | 6 |
| <i>circPDE8A</i> | miR-194-5p          | 1 |
| <i>circPDE8A</i> | miR-196-5p          | 1 |
| <i>circPDE8A</i> | miR-197-3p          | 1 |
| <i>circPDE8A</i> | miR-1976            | 2 |
| <i>circPDE8A</i> | miR-199-5p          | 2 |
| <i>circPDE8A</i> | miR-200ab-5p        | 2 |
| <i>circPDE8A</i> | miR-200c-5p/550a-3p | 1 |
| <i>circPDE8A</i> | miR-202-5p          | 1 |
| <i>circPDE8A</i> | miR-203a-5p         | 2 |
| <i>circPDE8A</i> | miR-203b-3p         | 1 |
| <i>circPDE8A</i> | miR-203b-5p/6718-5p | 4 |
| <i>circPDE8A</i> | miR-204-3p/4646-5p  | 2 |
| <i>circPDE8A</i> | miR-205-3p          | 1 |
| <i>circPDE8A</i> | miR-2054            | 1 |
| <i>circPDE8A</i> | miR-208-3p          | 1 |
| <i>circPDE8A</i> | miR-208-5p          | 1 |
| <i>circPDE8A</i> | miR-2110            | 2 |
| <i>circPDE8A</i> | miR-2113            | 1 |
| <i>circPDE8A</i> | miR-2114-5p         | 3 |
| <i>circPDE8A</i> | miR-2115-3p         | 1 |
| <i>circPDE8A</i> | miR-2116-3p         | 3 |
| <i>circPDE8A</i> | miR-2116-5p         | 2 |
| <i>circPDE8A</i> | miR-2117            | 5 |
| <i>circPDE8A</i> | miR-215-3p          | 3 |
| <i>circPDE8A</i> | miR-218-1-3p        | 4 |
| <i>circPDE8A</i> | miR-218-2-3p        | 4 |
| <i>circPDE8A</i> | miR-219a-1-3p       | 2 |
| <i>circPDE8A</i> | miR-219a-2-3p       | 3 |
| <i>circPDE8A</i> | miR-219b-3p         | 3 |
| <i>circPDE8A</i> | miR-219b-5p         | 1 |
| <i>circPDE8A</i> | miR-22-5p           | 2 |
| <i>circPDE8A</i> | miR-221-5p/8073     | 2 |
| <i>circPDE8A</i> | miR-224-5p          | 1 |

|                  |                                              |   |
|------------------|----------------------------------------------|---|
| <i>circPDE8A</i> | miR-2276-3p                                  | 1 |
| <i>circPDE8A</i> | miR-2276-5p                                  | 1 |
| <i>circPDE8A</i> | miR-2355-5p                                  | 1 |
| <i>circPDE8A</i> | miR-25-3p/32-5p/92-3p/363-3p/367-3p          | 2 |
| <i>circPDE8A</i> | miR-26-3p                                    | 1 |
| <i>circPDE8A</i> | miR-26-5p                                    | 1 |
| <i>circPDE8A</i> | miR-2681-3p                                  | 2 |
| <i>circPDE8A</i> | miR-27-3p                                    | 5 |
| <i>circPDE8A</i> | miR-27a-5p                                   | 3 |
| <i>circPDE8A</i> | miR-27b-5p                                   | 1 |
| <i>circPDE8A</i> | miR-28-5p/708-5p                             | 1 |
| <i>circPDE8A</i> | miR-29-3p                                    | 2 |
| <i>circPDE8A</i> | miR-2909                                     | 2 |
| <i>circPDE8A</i> | miR-296-3p                                   | 1 |
| <i>circPDE8A</i> | miR-296-5p                                   | 2 |
| <i>circPDE8A</i> | miR-29a-5p                                   | 1 |
| <i>circPDE8A</i> | miR-29b-2-5p                                 | 1 |
| <i>circPDE8A</i> | miR-301a-5p/301b-5p                          | 1 |
| <i>circPDE8A</i> | miR-302-3p/372-3p/373-3p/520-3p              | 1 |
| <i>circPDE8A</i> | miR-302b-5p/302d-5p                          | 1 |
| <i>circPDE8A</i> | miR-302c-3p.2/520-3p                         | 2 |
| <i>circPDE8A</i> | miR-3064-3p                                  | 1 |
| <i>circPDE8A</i> | miR-3065-3p                                  | 6 |
| <i>circPDE8A</i> | miR-3074-3p                                  | 3 |
| <i>circPDE8A</i> | miR-3074-5p                                  | 6 |
| <i>circPDE8A</i> | miR-30b-3p/1273h-5p/3689-3p/6779-5p/6780a-5p | 3 |
| <i>circPDE8A</i> | miR-30c-3p/6788-5p                           | 3 |
| <i>circPDE8A</i> | miR-3117-5p                                  | 1 |
| <i>circPDE8A</i> | miR-3119                                     | 1 |
| <i>circPDE8A</i> | miR-3120-3p                                  | 2 |
| <i>circPDE8A</i> | miR-3121-3p                                  | 4 |
| <i>circPDE8A</i> | miR-3123                                     | 3 |
| <i>circPDE8A</i> | miR-3124-3p                                  | 4 |
| <i>circPDE8A</i> | miR-3126-3p                                  | 2 |
| <i>circPDE8A</i> | miR-3127-3p/6756-3p                          | 1 |
| <i>circPDE8A</i> | miR-3127-5p                                  | 1 |
| <i>circPDE8A</i> | miR-3129-3p/5583-5p                          | 1 |
| <i>circPDE8A</i> | miR-3133                                     | 4 |

|                  |                       |   |
|------------------|-----------------------|---|
| <i>circPDE8A</i> | miR-3136-3p/7155-3p   | 1 |
| <i>circPDE8A</i> | miR-3143              | 1 |
| <i>circPDE8A</i> | miR-3145-3p           | 1 |
| <i>circPDE8A</i> | miR-3148              | 1 |
| <i>circPDE8A</i> | miR-3150a-3p          | 2 |
| <i>circPDE8A</i> | miR-3150a-5p/3150b-5p | 1 |
| <i>circPDE8A</i> | miR-3156-3p           | 1 |
| <i>circPDE8A</i> | miR-3157-5p           | 2 |
| <i>circPDE8A</i> | miR-3158-3p           | 4 |
| <i>circPDE8A</i> | miR-3162-5p           | 2 |
| <i>circPDE8A</i> | miR-3163              | 2 |
| <i>circPDE8A</i> | miR-3164              | 1 |
| <i>circPDE8A</i> | miR-3166              | 1 |
| <i>circPDE8A</i> | miR-3168              | 1 |
| <i>circPDE8A</i> | miR-3169              | 1 |
| <i>circPDE8A</i> | miR-3171              | 1 |
| <i>circPDE8A</i> | miR-3173-3p/6891-5p   | 3 |
| <i>circPDE8A</i> | miR-3178              | 1 |
| <i>circPDE8A</i> | miR-3180-5p           | 5 |
| <i>circPDE8A</i> | miR-3182              | 4 |
| <i>circPDE8A</i> | miR-3185              | 1 |
| <i>circPDE8A</i> | miR-3187-3p           | 3 |
| <i>circPDE8A</i> | miR-3189-5p           | 1 |
| <i>circPDE8A</i> | miR-3191-5p           | 2 |
| <i>circPDE8A</i> | miR-3192-5p           | 2 |
| <i>circPDE8A</i> | miR-3193              | 1 |
| <i>circPDE8A</i> | miR-3194-3p           | 1 |
| <i>circPDE8A</i> | miR-3194-5p           | 3 |
| <i>circPDE8A</i> | miR-3198/4309         | 3 |
| <i>circPDE8A</i> | miR-3199/8052         | 3 |
| <i>circPDE8A</i> | miR-32-3p             | 1 |
| <i>circPDE8A</i> | miR-3200-3p           | 1 |
| <i>circPDE8A</i> | miR-3202              | 4 |
| <i>circPDE8A</i> | miR-323-3p            | 3 |
| <i>circPDE8A</i> | miR-323a-5p           | 1 |
| <i>circPDE8A</i> | miR-324-3p/1913       | 1 |
| <i>circPDE8A</i> | miR-326               | 2 |
| <i>circPDE8A</i> | miR-328-3p            | 3 |



|                  |                       |   |
|------------------|-----------------------|---|
| <i>circPDE8A</i> | miR-33-5p             | 2 |
| <i>circPDE8A</i> | miR-330-3p            | 2 |
| <i>circPDE8A</i> | miR-330-3p.2          | 1 |
| <i>circPDE8A</i> | miR-331-3p            | 2 |
| <i>circPDE8A</i> | miR-335-5p            | 2 |
| <i>circPDE8A</i> | miR-337-3p            | 1 |
| <i>circPDE8A</i> | miR-339-5p            | 2 |
| <i>circPDE8A</i> | miR-34-5p/449-5p      | 2 |
| <i>circPDE8A</i> | miR-342-3p            | 2 |
| <i>circPDE8A</i> | miR-34a-3p            | 4 |
| <i>circPDE8A</i> | miR-34b-3p            | 2 |
| <i>circPDE8A</i> | miR-34b-5p/449c-5p    | 2 |
| <i>circPDE8A</i> | miR-34c-3p            | 2 |
| <i>circPDE8A</i> | miR-3591-5p           | 1 |
| <i>circPDE8A</i> | miR-361-3p            | 3 |
| <i>circPDE8A</i> | miR-361-5p            | 1 |
| <i>circPDE8A</i> | miR-3613-3p           | 4 |
| <i>circPDE8A</i> | miR-3614-3p           | 1 |
| <i>circPDE8A</i> | miR-3617-3p           | 4 |
| <i>circPDE8A</i> | miR-3620-3p           | 1 |
| <i>circPDE8A</i> | miR-3622a-3p/3622b-3p | 3 |
| <i>circPDE8A</i> | miR-3622a-5p          | 2 |
| <i>circPDE8A</i> | miR-3622b-5p          | 7 |
| <i>circPDE8A</i> | miR-363-5p/6745       | 3 |
| <i>circPDE8A</i> | miR-3652/4430         | 2 |
| <i>circPDE8A</i> | miR-3653-3p           | 4 |
| <i>circPDE8A</i> | miR-3653-5p           | 2 |
| <i>circPDE8A</i> | miR-3654              | 1 |
| <i>circPDE8A</i> | miR-3657              | 1 |
| <i>circPDE8A</i> | miR-3659              | 6 |
| <i>circPDE8A</i> | miR-365a-5p/365b-5p   | 3 |
| <i>circPDE8A</i> | miR-3662              | 3 |
| <i>circPDE8A</i> | miR-3664-3p           | 2 |
| <i>circPDE8A</i> | miR-3664-5p           | 2 |
| <i>circPDE8A</i> | miR-3665              | 1 |
| <i>circPDE8A</i> | miR-3667-3p           | 2 |
| <i>circPDE8A</i> | miR-3667-5p           | 1 |
| <i>circPDE8A</i> | miR-367-5p            | 2 |

|                  |                           |   |
|------------------|---------------------------|---|
| <i>circPDE8A</i> | miR-3670                  | 1 |
| <i>circPDE8A</i> | miR-3672/6864-3p          | 3 |
| <i>circPDE8A</i> | miR-3677-5p               | 2 |
| <i>circPDE8A</i> | miR-3679-3p               | 2 |
| <i>circPDE8A</i> | miR-3680-5p               | 1 |
| <i>circPDE8A</i> | miR-3685                  | 1 |
| <i>circPDE8A</i> | miR-3686                  | 2 |
| <i>circPDE8A</i> | miR-3688-3p               | 3 |
| <i>circPDE8A</i> | miR-3688-5p               | 5 |
| <i>circPDE8A</i> | miR-369-3p                | 4 |
| <i>circPDE8A</i> | miR-3690                  | 1 |
| <i>circPDE8A</i> | miR-3692-5p               | 1 |
| <i>circPDE8A</i> | miR-371-5p                | 1 |
| <i>circPDE8A</i> | miR-3713                  | 1 |
| <i>circPDE8A</i> | miR-371b-5p/373-5p/616-5p | 1 |
| <i>circPDE8A</i> | miR-372-5p                | 1 |
| <i>circPDE8A</i> | miR-374a-3p               | 5 |
| <i>circPDE8A</i> | miR-374b-3p               | 2 |
| <i>circPDE8A</i> | miR-374c-3p               | 2 |
| <i>circPDE8A</i> | miR-375                   | 5 |
| <i>circPDE8A</i> | miR-377-3p                | 2 |
| <i>circPDE8A</i> | miR-378a-5p               | 3 |
| <i>circPDE8A</i> | miR-378g                  | 4 |
| <i>circPDE8A</i> | miR-380-5p/563            | 1 |
| <i>circPDE8A</i> | miR-382-3p                | 1 |
| <i>circPDE8A</i> | miR-383-3p                | 6 |
| <i>circPDE8A</i> | miR-384                   | 1 |
| <i>circPDE8A</i> | miR-3909                  | 1 |
| <i>circPDE8A</i> | miR-3913-3p               | 3 |
| <i>circPDE8A</i> | miR-3917                  | 2 |
| <i>circPDE8A</i> | miR-3918                  | 1 |
| <i>circPDE8A</i> | miR-3921/4653-5p          | 1 |
| <i>circPDE8A</i> | miR-3922-5p               | 3 |
| <i>circPDE8A</i> | miR-3924                  | 1 |
| <i>circPDE8A</i> | miR-3925-5p               | 3 |
| <i>circPDE8A</i> | miR-3927-3p/6831-5p       | 1 |
| <i>circPDE8A</i> | miR-3927-5p               | 1 |
| <i>circPDE8A</i> | miR-3928-3p               | 2 |

|                  |                       |   |
|------------------|-----------------------|---|
| <i>circPDE8A</i> | miR-3929/4419b/4478   | 2 |
| <i>circPDE8A</i> | miR-3934-5p           | 2 |
| <i>circPDE8A</i> | miR-3938              | 2 |
| <i>circPDE8A</i> | miR-3941              | 2 |
| <i>circPDE8A</i> | miR-3942-3p           | 1 |
| <i>circPDE8A</i> | miR-3943              | 2 |
| <i>circPDE8A</i> | miR-3944-5p           | 3 |
| <i>circPDE8A</i> | miR-3973              | 4 |
| <i>circPDE8A</i> | miR-3974              | 2 |
| <i>circPDE8A</i> | miR-3978              | 2 |
| <i>circPDE8A</i> | miR-410-3p            | 2 |
| <i>circPDE8A</i> | miR-421               | 1 |
| <i>circPDE8A</i> | miR-425-5p            | 1 |
| <i>circPDE8A</i> | miR-4254              | 1 |
| <i>circPDE8A</i> | miR-4255              | 5 |
| <i>circPDE8A</i> | miR-4259              | 2 |
| <i>circPDE8A</i> | miR-4263              | 1 |
| <i>circPDE8A</i> | miR-4264              | 3 |
| <i>circPDE8A</i> | miR-4265/4296/4322    | 3 |
| <i>circPDE8A</i> | miR-4266              | 1 |
| <i>circPDE8A</i> | miR-4270/4441/6754-5p | 1 |
| <i>circPDE8A</i> | miR-4273/7156-5p      | 1 |
| <i>circPDE8A</i> | miR-4276              | 2 |
| <i>circPDE8A</i> | miR-4279              | 3 |
| <i>circPDE8A</i> | miR-4280              | 2 |
| <i>circPDE8A</i> | miR-4282              | 2 |
| <i>circPDE8A</i> | miR-4286              | 1 |
| <i>circPDE8A</i> | miR-4290              | 1 |
| <i>circPDE8A</i> | miR-4291              | 4 |
| <i>circPDE8A</i> | miR-4292/6791-5p      | 4 |
| <i>circPDE8A</i> | miR-4294              | 3 |
| <i>circPDE8A</i> | miR-4297/5581-5p      | 1 |
| <i>circPDE8A</i> | miR-4299              | 2 |
| <i>circPDE8A</i> | miR-4301              | 1 |
| <i>circPDE8A</i> | miR-4302              | 5 |
| <i>circPDE8A</i> | miR-4305              | 1 |
| <i>circPDE8A</i> | miR-4308              | 4 |
| <i>circPDE8A</i> | miR-4310/7157-5p      | 7 |

|                  |                                              |   |
|------------------|----------------------------------------------|---|
| <i>circPDE8A</i> | miR-4313                                     | 2 |
| <i>circPDE8A</i> | miR-4314                                     | 1 |
| <i>circPDE8A</i> | miR-432-5p                                   | 2 |
| <i>circPDE8A</i> | miR-4323                                     | 2 |
| <i>circPDE8A</i> | miR-4325                                     | 1 |
| <i>circPDE8A</i> | miR-4328                                     | 1 |
| <i>circPDE8A</i> | miR-4330                                     | 1 |
| <i>circPDE8A</i> | miR-4421/5699-3p                             | 1 |
| <i>circPDE8A</i> | miR-4422                                     | 1 |
| <i>circPDE8A</i> | miR-4423-3p                                  | 3 |
| <i>circPDE8A</i> | miR-4423-5p                                  | 2 |
| <i>circPDE8A</i> | miR-4428                                     | 3 |
| <i>circPDE8A</i> | miR-4432                                     | 1 |
| <i>circPDE8A</i> | miR-4433a-3p                                 | 1 |
| <i>circPDE8A</i> | miR-4433a-5p                                 | 3 |
| <i>circPDE8A</i> | miR-4433b-3p                                 | 3 |
| <i>circPDE8A</i> | miR-4434/4516/5703                           | 1 |
| <i>circPDE8A</i> | miR-4435                                     | 3 |
| <i>circPDE8A</i> | miR-4436b-3p/4632-5p/6735-5p/6879-5p/7843-5p | 2 |
| <i>circPDE8A</i> | miR-4443                                     | 2 |
| <i>circPDE8A</i> | miR-4446-3p                                  | 4 |
| <i>circPDE8A</i> | miR-4446-5p                                  | 1 |
| <i>circPDE8A</i> | miR-4450                                     | 2 |
| <i>circPDE8A</i> | miR-4456                                     | 2 |
| <i>circPDE8A</i> | miR-4457                                     | 1 |
| <i>circPDE8A</i> | miR-4459                                     | 1 |
| <i>circPDE8A</i> | miR-4460                                     | 1 |
| <i>circPDE8A</i> | miR-4473                                     | 1 |
| <i>circPDE8A</i> | miR-4474-3p                                  | 2 |
| <i>circPDE8A</i> | miR-4474-5p                                  | 4 |
| <i>circPDE8A</i> | miR-4475                                     | 3 |
| <i>circPDE8A</i> | miR-4476/6876-5p                             | 3 |
| <i>circPDE8A</i> | miR-4477a                                    | 1 |
| <i>circPDE8A</i> | miR-4477b                                    | 1 |
| <i>circPDE8A</i> | miR-448                                      | 1 |
| <i>circPDE8A</i> | miR-4480                                     | 3 |
| <i>circPDE8A</i> | miR-4485-5p                                  | 1 |
| <i>circPDE8A</i> | miR-4486                                     | 4 |

|                  |                          |   |
|------------------|--------------------------|---|
| <i>circPDE8A</i> | miR-4493                 | 3 |
| <i>circPDE8A</i> | miR-4494                 | 1 |
| <i>circPDE8A</i> | miR-4495                 | 2 |
| <i>circPDE8A</i> | miR-4497                 | 1 |
| <i>circPDE8A</i> | miR-4503                 | 2 |
| <i>circPDE8A</i> | miR-4505/5787            | 2 |
| <i>circPDE8A</i> | miR-4509                 | 3 |
| <i>circPDE8A</i> | miR-450b-3p/769-3p       | 1 |
| <i>circPDE8A</i> | miR-4511                 | 2 |
| <i>circPDE8A</i> | miR-4512                 | 1 |
| <i>circPDE8A</i> | miR-452-3p               | 4 |
| <i>circPDE8A</i> | miR-4520-2-3p            | 1 |
| <i>circPDE8A</i> | miR-4520-3p              | 1 |
| <i>circPDE8A</i> | miR-4522                 | 2 |
| <i>circPDE8A</i> | miR-4529-3p              | 1 |
| <i>circPDE8A</i> | miR-4531                 | 3 |
| <i>circPDE8A</i> | miR-4532                 | 1 |
| <i>circPDE8A</i> | miR-4533                 | 4 |
| <i>circPDE8A</i> | miR-4536-3p              | 1 |
| <i>circPDE8A</i> | miR-4536-5p              | 3 |
| <i>circPDE8A</i> | miR-455-3p.2             | 1 |
| <i>circPDE8A</i> | miR-4635                 | 3 |
| <i>circPDE8A</i> | miR-4639-3p              | 1 |
| <i>circPDE8A</i> | miR-4642                 | 4 |
| <i>circPDE8A</i> | miR-4643                 | 1 |
| <i>circPDE8A</i> | miR-4645-5p/4673         | 3 |
| <i>circPDE8A</i> | miR-4648                 | 4 |
| <i>circPDE8A</i> | miR-4653-3p              | 2 |
| <i>circPDE8A</i> | miR-4654/4769-5p         | 4 |
| <i>circPDE8A</i> | miR-4658/6790-5p         | 5 |
| <i>circPDE8A</i> | miR-4659a-3p/4659b-3p    | 3 |
| <i>circPDE8A</i> | miR-4662a-3p             | 2 |
| <i>circPDE8A</i> | miR-4663                 | 1 |
| <i>circPDE8A</i> | miR-4666b                | 1 |
| <i>circPDE8A</i> | miR-4667-5p/4700-5p/8089 | 1 |
| <i>circPDE8A</i> | miR-4668-3p              | 1 |
| <i>circPDE8A</i> | miR-4669                 | 1 |
| <i>circPDE8A</i> | miR-4670-5p              | 2 |

|                  |                     |   |
|------------------|---------------------|---|
| <i>circPDE8A</i> | miR-4671-3p         | 1 |
| <i>circPDE8A</i> | miR-4672            | 2 |
| <i>circPDE8A</i> | miR-4677-3p         | 1 |
| <i>circPDE8A</i> | miR-4677-5p         | 1 |
| <i>circPDE8A</i> | miR-4679            | 1 |
| <i>circPDE8A</i> | miR-4680-5p         | 1 |
| <i>circPDE8A</i> | miR-4683            | 3 |
| <i>circPDE8A</i> | miR-4685-5p/6837-5p | 2 |
| <i>circPDE8A</i> | miR-4687-5p         | 1 |
| <i>circPDE8A</i> | miR-4690-3p/5685    | 2 |
| <i>circPDE8A</i> | miR-4691-3p         | 1 |
| <i>circPDE8A</i> | miR-4691-5p/6792-3p | 1 |
| <i>circPDE8A</i> | miR-4694-3p         | 2 |
| <i>circPDE8A</i> | miR-4694-5p         | 1 |
| <i>circPDE8A</i> | miR-4698            | 4 |
| <i>circPDE8A</i> | miR-4700-3p         | 3 |
| <i>circPDE8A</i> | miR-4704-3p         | 1 |
| <i>circPDE8A</i> | miR-4708-5p         | 3 |
| <i>circPDE8A</i> | miR-4709-3p         | 1 |
| <i>circPDE8A</i> | miR-4709-5p         | 1 |
| <i>circPDE8A</i> | miR-4711-3p         | 1 |
| <i>circPDE8A</i> | miR-4713-3p         | 2 |
| <i>circPDE8A</i> | miR-4713-5p         | 5 |
| <i>circPDE8A</i> | miR-4714-3p         | 1 |
| <i>circPDE8A</i> | miR-4714-5p         | 2 |
| <i>circPDE8A</i> | miR-4715-3p         | 1 |
| <i>circPDE8A</i> | miR-4715-5p         | 2 |
| <i>circPDE8A</i> | miR-4716-5p         | 3 |
| <i>circPDE8A</i> | miR-4722-3p/6727-3p | 2 |
| <i>circPDE8A</i> | miR-4724-3p         | 1 |
| <i>circPDE8A</i> | miR-4724-5p         | 1 |
| <i>circPDE8A</i> | miR-4726-3p         | 4 |
| <i>circPDE8A</i> | miR-4727-3p         | 1 |
| <i>circPDE8A</i> | miR-4728-3p         | 1 |
| <i>circPDE8A</i> | miR-4729            | 3 |
| <i>circPDE8A</i> | miR-4731-3p/4801    | 1 |
| <i>circPDE8A</i> | miR-4732-3p         | 4 |
| <i>circPDE8A</i> | miR-4735-5p         | 1 |

|                  |                     |   |
|------------------|---------------------|---|
| <i>circPDE8A</i> | miR-4736            | 1 |
| <i>circPDE8A</i> | miR-4738-3p         | 1 |
| <i>circPDE8A</i> | miR-4739            | 3 |
| <i>circPDE8A</i> | miR-4740-3p         | 3 |
| <i>circPDE8A</i> | miR-4742-3p         | 1 |
| <i>circPDE8A</i> | miR-4744            | 3 |
| <i>circPDE8A</i> | miR-4747-3p         | 2 |
| <i>circPDE8A</i> | miR-4750-3p         | 2 |
| <i>circPDE8A</i> | miR-4753-5p         | 6 |
| <i>circPDE8A</i> | miR-4755-5p/5006-3p | 2 |
| <i>circPDE8A</i> | miR-4758-3p         | 1 |
| <i>circPDE8A</i> | miR-4759            | 1 |
| <i>circPDE8A</i> | miR-4760-3p         | 3 |
| <i>circPDE8A</i> | miR-4761-3p         | 1 |
| <i>circPDE8A</i> | miR-4761-5p         | 2 |
| <i>circPDE8A</i> | miR-4762-5p         | 1 |
| <i>circPDE8A</i> | miR-4764-3p         | 2 |
| <i>circPDE8A</i> | miR-4765            | 3 |
| <i>circPDE8A</i> | miR-4766-5p         | 3 |
| <i>circPDE8A</i> | miR-4768-3p         | 1 |
| <i>circPDE8A</i> | miR-4769-3p/6817-5p | 1 |
| <i>circPDE8A</i> | miR-4771            | 1 |
| <i>circPDE8A</i> | miR-4772-3p         | 1 |
| <i>circPDE8A</i> | miR-4773            | 3 |
| <i>circPDE8A</i> | miR-4775            | 5 |
| <i>circPDE8A</i> | miR-4776-3p         | 1 |
| <i>circPDE8A</i> | miR-4777-5p         | 1 |
| <i>circPDE8A</i> | miR-4782-5p/5706    | 2 |
| <i>circPDE8A</i> | miR-4786-3p         | 1 |
| <i>circPDE8A</i> | miR-4786-5p         | 2 |
| <i>circPDE8A</i> | miR-4789-3p         | 1 |
| <i>circPDE8A</i> | miR-4790-3p         | 2 |
| <i>circPDE8A</i> | miR-4793-5p         | 1 |
| <i>circPDE8A</i> | miR-4796-3p         | 2 |
| <i>circPDE8A</i> | miR-4797-3p         | 3 |
| <i>circPDE8A</i> | miR-4798-3p         | 1 |
| <i>circPDE8A</i> | miR-4799-5p         | 2 |
| <i>circPDE8A</i> | miR-4800-3p         | 3 |

|                  |                             |   |
|------------------|-----------------------------|---|
| <i>circPDE8A</i> | miR-4802-3p                 | 1 |
| <i>circPDE8A</i> | miR-4803                    | 2 |
| <i>circPDE8A</i> | miR-483-3p.1                | 2 |
| <i>circPDE8A</i> | miR-483-5p                  | 1 |
| <i>circPDE8A</i> | miR-484/3155                | 2 |
| <i>circPDE8A</i> | miR-489-3p                  | 1 |
| <i>circPDE8A</i> | miR-490-5p                  | 3 |
| <i>circPDE8A</i> | miR-495-3p                  | 1 |
| <i>circPDE8A</i> | miR-497-3p                  | 2 |
| <i>circPDE8A</i> | miR-498                     | 2 |
| <i>circPDE8A</i> | miR-499a-3p/499b-3p         | 8 |
| <i>circPDE8A</i> | miR-499a-5p                 | 1 |
| <i>circPDE8A</i> | miR-499b-5p                 | 1 |
| <i>circPDE8A</i> | miR-5000-3p                 | 1 |
| <i>circPDE8A</i> | miR-5002-5p                 | 1 |
| <i>circPDE8A</i> | miR-5003-3p                 | 2 |
| <i>circPDE8A</i> | miR-5003-5p                 | 1 |
| <i>circPDE8A</i> | miR-5004-3p                 | 2 |
| <i>circPDE8A</i> | miR-501-3p/502-3p           | 1 |
| <i>circPDE8A</i> | miR-5010-3p                 | 1 |
| <i>circPDE8A</i> | miR-5011-3p                 | 1 |
| <i>circPDE8A</i> | miR-5011-5p                 | 2 |
| <i>circPDE8A</i> | miR-503-3p                  | 1 |
| <i>circPDE8A</i> | miR-504-3p                  | 3 |
| <i>circPDE8A</i> | miR-505-3p.2                | 1 |
| <i>circPDE8A</i> | miR-5087                    | 1 |
| <i>circPDE8A</i> | miR-5088-5p                 | 4 |
| <i>circPDE8A</i> | miR-5089-5p                 | 1 |
| <i>circPDE8A</i> | miR-509-3p                  | 3 |
| <i>circPDE8A</i> | miR-5094                    | 1 |
| <i>circPDE8A</i> | miR-5095/7151-3p            | 2 |
| <i>circPDE8A</i> | miR-510-3p                  | 5 |
| <i>circPDE8A</i> | miR-5100                    | 1 |
| <i>circPDE8A</i> | miR-511-3p                  | 2 |
| <i>circPDE8A</i> | miR-512-3p                  | 2 |
| <i>circPDE8A</i> | miR-512-5p                  | 4 |
| <i>circPDE8A</i> | miR-513a-3p/513c-3p/3606-3p | 2 |
| <i>circPDE8A</i> | miR-513a-5p                 | 5 |



|                  |                                                                   |   |
|------------------|-------------------------------------------------------------------|---|
| <i>circPDE8A</i> | miR-513b-5p                                                       | 1 |
| <i>circPDE8A</i> | miR-513c-5p/514b-5p                                               | 1 |
| <i>circPDE8A</i> | miR-514a-3p                                                       | 3 |
| <i>circPDE8A</i> | miR-514a-5p                                                       | 2 |
| <i>circPDE8A</i> | miR-516b-5p                                                       | 2 |
| <i>circPDE8A</i> | miR-517-5p                                                        | 1 |
| <i>circPDE8A</i> | miR-518-3p                                                        | 2 |
| <i>circPDE8A</i> | miR-5189-3p                                                       | 1 |
| <i>circPDE8A</i> | miR-518c-5p                                                       | 2 |
| <i>circPDE8A</i> | miR-518d-5p/519-5p                                                | 1 |
| <i>circPDE8A</i> | miR-519-3p                                                        | 1 |
| <i>circPDE8A</i> | miR-5192                                                          | 3 |
| <i>circPDE8A</i> | miR-5195-5p                                                       | 1 |
| <i>circPDE8A</i> | miR-5196-3p                                                       | 1 |
| <i>circPDE8A</i> | miR-5197-5p                                                       | 2 |
| <i>circPDE8A</i> | miR-520g-3p                                                       | 4 |
| <i>circPDE8A</i> | miR-522-3p                                                        | 2 |
| <i>circPDE8A</i> | miR-524-5p                                                        | 2 |
| <i>circPDE8A</i> | miR-532-3p                                                        | 3 |
| <i>circPDE8A</i> | miR-532-5p                                                        | 1 |
| <i>circPDE8A</i> | miR-539-5p                                                        | 4 |
| <i>circPDE8A</i> | miR-541-5p                                                        | 3 |
| <i>circPDE8A</i> | miR-543                                                           | 2 |
| <i>circPDE8A</i> | miR-544a                                                          | 1 |
| <i>circPDE8A</i> | miR-545-3p                                                        | 1 |
| <i>circPDE8A</i> | miR-548ac/548bb-3p/548d-3p/548h-3p/548z                           |   |
| <i>circPDE8A</i> | miR-548ah-5p/3609                                                 | 2 |
| <i>circPDE8A</i> | miR-548ao-3p                                                      | 1 |
| <i>circPDE8A</i> | miR-548aq-3p/548am-3p/548aj-3p/548ahk-3p/548ae-3p/548j-3p/548x-3p |   |
| <i>circPDE8A</i> | miR-548at-5p                                                      | 3 |
| <i>circPDE8A</i> | miR-548au-3p                                                      | 2 |
| <i>circPDE8A</i> | miR-548az-3p/548ar-3p/548a-3p/548e-3p/548f-3p                     |   |
| <i>circPDE8A</i> | miR-548b-3p                                                       | 2 |
| <i>circPDE8A</i> | miR-548c-3p                                                       | 6 |
| <i>circPDE8A</i> | miR-548e-5p                                                       | 1 |
| <i>circPDE8A</i> | miR-548g-3p                                                       | 4 |
| <i>circPDE8A</i> | miR-548p                                                          | 3 |
| <i>circPDE8A</i> | miR-548q                                                          | 2 |

|                  |                 |   |
|------------------|-----------------|---|
| <i>circPDE8A</i> | miR-548s        | 3 |
| <i>circPDE8A</i> | miR-550b-3p     | 1 |
| <i>circPDE8A</i> | miR-551-3p      | 2 |
| <i>circPDE8A</i> | miR-551b-5p     | 3 |
| <i>circPDE8A</i> | miR-552-3p      | 1 |
| <i>circPDE8A</i> | miR-556-3p      | 1 |
| <i>circPDE8A</i> | miR-5580-3p     | 2 |
| <i>circPDE8A</i> | miR-5581-3p     | 5 |
| <i>circPDE8A</i> | miR-5582-3p     | 1 |
| <i>circPDE8A</i> | miR-5582-5p     | 2 |
| <i>circPDE8A</i> | miR-5584-3p     | 1 |
| <i>circPDE8A</i> | miR-5585-3p     | 2 |
| <i>circPDE8A</i> | miR-5586-3p     | 2 |
| <i>circPDE8A</i> | miR-5587-5p     | 2 |
| <i>circPDE8A</i> | miR-5588-3p     | 3 |
| <i>circPDE8A</i> | miR-5589-3p     | 3 |
| <i>circPDE8A</i> | miR-561-3p      | 3 |
| <i>circPDE8A</i> | miR-561-5p      | 5 |
| <i>circPDE8A</i> | miR-566         | 1 |
| <i>circPDE8A</i> | miR-568         | 1 |
| <i>circPDE8A</i> | miR-5682        | 2 |
| <i>circPDE8A</i> | miR-5683        | 3 |
| <i>circPDE8A</i> | miR-5689        | 1 |
| <i>circPDE8A</i> | miR-5692a       | 2 |
| <i>circPDE8A</i> | miR-5692bc      | 4 |
| <i>circPDE8A</i> | miR-5693        | 6 |
| <i>circPDE8A</i> | miR-5696        | 4 |
| <i>circPDE8A</i> | miR-5699-5p     | 1 |
| <i>circPDE8A</i> | miR-570-3p      | 1 |
| <i>circPDE8A</i> | miR-5700        | 1 |
| <i>circPDE8A</i> | miR-5701        | 3 |
| <i>circPDE8A</i> | miR-5702        | 1 |
| <i>circPDE8A</i> | miR-5707        | 1 |
| <i>circPDE8A</i> | miR-571         | 2 |
| <i>circPDE8A</i> | miR-574-5p      | 6 |
| <i>circPDE8A</i> | miR-575/4676-5p | 1 |
| <i>circPDE8A</i> | miR-576-5p      | 1 |
| <i>circPDE8A</i> | miR-577         | 2 |

|                  |                                      |   |
|------------------|--------------------------------------|---|
| <i>circPDE8A</i> | miR-579-3p                           | 4 |
| <i>circPDE8A</i> | miR-580-3p                           | 1 |
| <i>circPDE8A</i> | miR-580-5p                           | 3 |
| <i>circPDE8A</i> | miR-581                              | 1 |
| <i>circPDE8A</i> | miR-582-3p                           | 1 |
| <i>circPDE8A</i> | miR-582-5p                           | 1 |
| <i>circPDE8A</i> | miR-585-5p                           | 2 |
| <i>circPDE8A</i> | miR-587                              | 4 |
| <i>circPDE8A</i> | miR-588                              | 3 |
| <i>circPDE8A</i> | miR-589-5p                           | 1 |
| <i>circPDE8A</i> | miR-590-3p                           | 1 |
| <i>circPDE8A</i> | miR-591                              | 1 |
| <i>circPDE8A</i> | miR-593-3p                           | 1 |
| <i>circPDE8A</i> | miR-593-5p                           | 2 |
| <i>circPDE8A</i> | miR-597-3p                           | 5 |
| <i>circPDE8A</i> | miR-597-5p                           | 2 |
| <i>circPDE8A</i> | miR-602                              | 3 |
| <i>circPDE8A</i> | miR-604                              | 3 |
| <i>circPDE8A</i> | miR-605-3p                           | 3 |
| <i>circPDE8A</i> | miR-6068                             | 2 |
| <i>circPDE8A</i> | miR-607                              | 3 |
| <i>circPDE8A</i> | miR-6070                             | 1 |
| <i>circPDE8A</i> | miR-6072/6891-3p                     | 5 |
| <i>circPDE8A</i> | miR-6073                             | 1 |
| <i>circPDE8A</i> | miR-6074                             | 3 |
| <i>circPDE8A</i> | miR-6076/6797-3p                     | 3 |
| <i>circPDE8A</i> | miR-6077                             | 1 |
| <i>circPDE8A</i> | miR-6079                             | 4 |
| <i>circPDE8A</i> | miR-6080                             | 1 |
| <i>circPDE8A</i> | miR-6083                             | 4 |
| <i>circPDE8A</i> | miR-6084                             | 1 |
| <i>circPDE8A</i> | miR-610                              | 3 |
| <i>circPDE8A</i> | miR-612/1285-3p/3187-5p/5189-5p/6860 | 4 |
| <i>circPDE8A</i> | miR-6124                             | 1 |
| <i>circPDE8A</i> | miR-6126                             | 1 |
| <i>circPDE8A</i> | miR-6128                             | 5 |
| <i>circPDE8A</i> | miR-6132/6836-5p                     | 2 |
| <i>circPDE8A</i> | miR-615-3p                           | 3 |

|                  |                    |   |
|------------------|--------------------|---|
| <i>circPDE8A</i> | miR-615-5p         | 1 |
| <i>circPDE8A</i> | miR-616-3p         | 5 |
| <i>circPDE8A</i> | miR-619-3p         | 1 |
| <i>circPDE8A</i> | miR-619-5p/6506-5p | 2 |
| <i>circPDE8A</i> | miR-622            | 2 |
| <i>circPDE8A</i> | miR-624-3p         | 2 |
| <i>circPDE8A</i> | miR-628-5p         | 1 |
| <i>circPDE8A</i> | miR-629-3p         | 5 |
| <i>circPDE8A</i> | miR-630            | 3 |
| <i>circPDE8A</i> | miR-632/4288       | 1 |
| <i>circPDE8A</i> | miR-634            | 1 |
| <i>circPDE8A</i> | miR-636            | 1 |
| <i>circPDE8A</i> | miR-637            | 1 |
| <i>circPDE8A</i> | miR-638            | 2 |
| <i>circPDE8A</i> | miR-640            | 2 |
| <i>circPDE8A</i> | miR-642-3p         | 1 |
| <i>circPDE8A</i> | miR-647            | 3 |
| <i>circPDE8A</i> | miR-6499-3p        | 7 |
| <i>circPDE8A</i> | miR-6501-3p        | 1 |
| <i>circPDE8A</i> | miR-6501-5p        | 2 |
| <i>circPDE8A</i> | miR-6502-3p        | 4 |
| <i>circPDE8A</i> | miR-6503-3p        | 3 |
| <i>circPDE8A</i> | miR-6505-5p        | 1 |
| <i>circPDE8A</i> | miR-6507-3p        | 5 |
| <i>circPDE8A</i> | miR-6507-5p        | 4 |
| <i>circPDE8A</i> | miR-651-3p         | 2 |
| <i>circPDE8A</i> | miR-6511-3p        | 1 |
| <i>circPDE8A</i> | miR-6511-5p        | 1 |
| <i>circPDE8A</i> | miR-6512-5p        | 3 |
| <i>circPDE8A</i> | miR-6513-3p        | 1 |
| <i>circPDE8A</i> | miR-6514-3p        | 1 |
| <i>circPDE8A</i> | miR-6515-5p        | 2 |
| <i>circPDE8A</i> | miR-653-3p         | 2 |
| <i>circPDE8A</i> | miR-653-5p         | 4 |
| <i>circPDE8A</i> | miR-654-5p         | 3 |
| <i>circPDE8A</i> | miR-656-3p         | 1 |
| <i>circPDE8A</i> | miR-657            | 1 |
| <i>circPDE8A</i> | miR-660-5p         | 1 |

|                  |                     |   |
|------------------|---------------------|---|
| <i>circPDE8A</i> | miR-661             | 1 |
| <i>circPDE8A</i> | miR-663b            | 1 |
| <i>circPDE8A</i> | miR-664a-3p         | 2 |
| <i>circPDE8A</i> | miR-664a-5p/4794    | 2 |
| <i>circPDE8A</i> | miR-664b-5p         | 1 |
| <i>circPDE8A</i> | miR-665             | 3 |
| <i>circPDE8A</i> | miR-668-3p          | 1 |
| <i>circPDE8A</i> | miR-668-5p          | 1 |
| <i>circPDE8A</i> | miR-670-3p          | 4 |
| <i>circPDE8A</i> | miR-670-5p          | 2 |
| <i>circPDE8A</i> | miR-671-3p          | 1 |
| <i>circPDE8A</i> | miR-671-5p          | 1 |
| <i>circPDE8A</i> | miR-6715a-3p        | 2 |
| <i>circPDE8A</i> | miR-6716-5p         | 2 |
| <i>circPDE8A</i> | miR-6720-3p         | 1 |
| <i>circPDE8A</i> | miR-6721-5p         | 4 |
| <i>circPDE8A</i> | miR-6722-5p         | 1 |
| <i>circPDE8A</i> | miR-6724-5p/6773-5p | 1 |
| <i>circPDE8A</i> | miR-6728-5p         | 1 |
| <i>circPDE8A</i> | miR-6731-3p         | 1 |
| <i>circPDE8A</i> | miR-6731-5p/8085    | 3 |
| <i>circPDE8A</i> | miR-6733-3p         | 5 |
| <i>circPDE8A</i> | miR-6734-3p         | 2 |
| <i>circPDE8A</i> | miR-6736-3p         | 3 |
| <i>circPDE8A</i> | miR-6738-3p         | 1 |
| <i>circPDE8A</i> | miR-6740-3p         | 2 |
| <i>circPDE8A</i> | miR-6741-5p         | 3 |
| <i>circPDE8A</i> | miR-6742-3p         | 5 |
| <i>circPDE8A</i> | miR-6747-3p         | 2 |
| <i>circPDE8A</i> | miR-6748-3p         | 1 |
| <i>circPDE8A</i> | miR-6748-5p         | 3 |
| <i>circPDE8A</i> | miR-6749-3p         | 1 |
| <i>circPDE8A</i> | miR-6749-5p         | 1 |
| <i>circPDE8A</i> | miR-6750-3p         | 4 |
| <i>circPDE8A</i> | miR-6753-5p         | 2 |
| <i>circPDE8A</i> | miR-6756-5p/6766-5p | 3 |
| <i>circPDE8A</i> | miR-6757-3p         | 1 |
| <i>circPDE8A</i> | miR-6757-5p         | 3 |

|                  |                       |   |
|------------------|-----------------------|---|
| <i>circPDE8A</i> | miR-6758-3p           | 3 |
| <i>circPDE8A</i> | miR-6758-5p/6856-5p   | 1 |
| <i>circPDE8A</i> | miR-6759-5p           | 3 |
| <i>circPDE8A</i> | miR-6760-3p           | 1 |
| <i>circPDE8A</i> | miR-6760-5p           | 3 |
| <i>circPDE8A</i> | miR-6762-3p           | 3 |
| <i>circPDE8A</i> | miR-6764-3p/6824-3p   | 2 |
| <i>circPDE8A</i> | miR-6765-3p           | 3 |
| <i>circPDE8A</i> | miR-6768-5p           | 3 |
| <i>circPDE8A</i> | miR-6769a-3p          | 2 |
| <i>circPDE8A</i> | miR-6769a-5p/6769b-5p | 3 |
| <i>circPDE8A</i> | miR-6773-3p           | 3 |
| <i>circPDE8A</i> | miR-6776-5p           | 1 |
| <i>circPDE8A</i> | miR-6777-3p           | 1 |
| <i>circPDE8A</i> | miR-6779-3p           | 1 |
| <i>circPDE8A</i> | miR-6780a-3p          | 2 |
| <i>circPDE8A</i> | miR-6782-5p           | 1 |
| <i>circPDE8A</i> | miR-6784-3p/6862-3p   | 1 |
| <i>circPDE8A</i> | miR-6787-3p           | 3 |
| <i>circPDE8A</i> | miR-6789-3p           | 1 |
| <i>circPDE8A</i> | miR-6790-3p           | 3 |
| <i>circPDE8A</i> | miR-6792-5p           | 1 |
| <i>circPDE8A</i> | miR-6793-3p           | 2 |
| <i>circPDE8A</i> | miR-6793-5p           | 3 |
| <i>circPDE8A</i> | miR-6794-3p           | 1 |
| <i>circPDE8A</i> | miR-6796-5p           | 3 |
| <i>circPDE8A</i> | miR-6798-5p           | 1 |
| <i>circPDE8A</i> | miR-6801-3p/6810-3p   | 2 |
| <i>circPDE8A</i> | miR-6801-5p           | 3 |
| <i>circPDE8A</i> | miR-6810-5p           | 2 |
| <i>circPDE8A</i> | miR-6813-3p           | 1 |
| <i>circPDE8A</i> | miR-6815-3p           | 5 |
| <i>circPDE8A</i> | miR-6815-5p/6865-5p   | 1 |
| <i>circPDE8A</i> | miR-6821-3p           | 3 |
| <i>circPDE8A</i> | miR-6821-5p           | 1 |
| <i>circPDE8A</i> | miR-6822-3p           | 2 |
| <i>circPDE8A</i> | miR-6823-5p           | 2 |
| <i>circPDE8A</i> | miR-6826-3p           | 2 |

|                  |             |   |
|------------------|-------------|---|
| <i>circPDE8A</i> | miR-6827-5p | 2 |
| <i>circPDE8A</i> | miR-6828-5p | 1 |
| <i>circPDE8A</i> | miR-6830-3p | 1 |
| <i>circPDE8A</i> | miR-6832-3p | 1 |
| <i>circPDE8A</i> | miR-6838-3p | 2 |
| <i>circPDE8A</i> | miR-6840-3p | 4 |
| <i>circPDE8A</i> | miR-6842-3p | 3 |
| <i>circPDE8A</i> | miR-6851-3p | 2 |
| <i>circPDE8A</i> | miR-6852-5p | 5 |
| <i>circPDE8A</i> | miR-6854-5p | 3 |
| <i>circPDE8A</i> | miR-6857-5p | 2 |
| <i>circPDE8A</i> | miR-6858-3p | 1 |
| <i>circPDE8A</i> | miR-6861-5p | 1 |
| <i>circPDE8A</i> | miR-6864-5p | 1 |
| <i>circPDE8A</i> | miR-6867-3p | 5 |
| <i>circPDE8A</i> | miR-6868-3p | 2 |
| <i>circPDE8A</i> | miR-6869-5p | 1 |
| <i>circPDE8A</i> | miR-6870-3p | 2 |
| <i>circPDE8A</i> | miR-6871-3p | 2 |
| <i>circPDE8A</i> | miR-6871-5p | 6 |
| <i>circPDE8A</i> | miR-6872-3p | 1 |
| <i>circPDE8A</i> | miR-6875-3p | 3 |
| <i>circPDE8A</i> | miR-6878-5p | 3 |
| <i>circPDE8A</i> | miR-6879-3p | 1 |
| <i>circPDE8A</i> | miR-6881-3p | 2 |
| <i>circPDE8A</i> | miR-6881-5p | 1 |
| <i>circPDE8A</i> | miR-6882-3p | 1 |
| <i>circPDE8A</i> | miR-6882-5p | 1 |
| <i>circPDE8A</i> | miR-6884-3p | 2 |
| <i>circPDE8A</i> | miR-6888-3p | 3 |
| <i>circPDE8A</i> | miR-6888-5p | 1 |
| <i>circPDE8A</i> | miR-6890-3p | 1 |
| <i>circPDE8A</i> | miR-6892-3p | 1 |
| <i>circPDE8A</i> | miR-6894-3p | 1 |
| <i>circPDE8A</i> | miR-6894-5p | 2 |
| <i>circPDE8A</i> | miR-6895-3p | 1 |
| <i>circPDE8A</i> | miR-6895-5p | 1 |
| <i>circPDE8A</i> | miR-7-3p    | 4 |

|                  |             |   |
|------------------|-------------|---|
| <i>circPDE8A</i> | miR-7-5p    | 1 |
| <i>circPDE8A</i> | miR-7108-5p | 2 |
| <i>circPDE8A</i> | miR-7109-3p | 1 |
| <i>circPDE8A</i> | miR-7111-3p | 2 |
| <i>circPDE8A</i> | miR-7113-5p | 2 |
| <i>circPDE8A</i> | miR-7150    | 3 |
| <i>circPDE8A</i> | miR-7152-5p | 6 |
| <i>circPDE8A</i> | miR-7153-3p | 4 |
| <i>circPDE8A</i> | miR-7154-3p | 2 |
| <i>circPDE8A</i> | miR-7155-5p | 1 |
| <i>circPDE8A</i> | miR-7156-3p | 3 |
| <i>circPDE8A</i> | miR-7158-3p | 1 |
| <i>circPDE8A</i> | miR-7158-5p | 1 |
| <i>circPDE8A</i> | miR-7159-5p | 1 |
| <i>circPDE8A</i> | miR-7160-3p | 1 |
| <i>circPDE8A</i> | miR-7160-5p | 1 |
| <i>circPDE8A</i> | miR-744-3p  | 2 |
| <i>circPDE8A</i> | miR-758-5p  | 1 |
| <i>circPDE8A</i> | miR-759     | 1 |
| <i>circPDE8A</i> | miR-760     | 2 |
| <i>circPDE8A</i> | miR-765     | 2 |
| <i>circPDE8A</i> | miR-766-5p  | 2 |
| <i>circPDE8A</i> | miR-767-5p  | 3 |
| <i>circPDE8A</i> | miR-769-5p  | 2 |
| <i>circPDE8A</i> | miR-770-5p  | 3 |
| <i>circPDE8A</i> | miR-7702    | 1 |
| <i>circPDE8A</i> | miR-7703    | 1 |
| <i>circPDE8A</i> | miR-7704    | 1 |
| <i>circPDE8A</i> | miR-7843-3p | 2 |
| <i>circPDE8A</i> | miR-7844-5p | 1 |
| <i>circPDE8A</i> | miR-7849-3p | 1 |
| <i>circPDE8A</i> | miR-7850-5p | 1 |
| <i>circPDE8A</i> | miR-7851-3p | 1 |
| <i>circPDE8A</i> | miR-7855-5p | 4 |
| <i>circPDE8A</i> | miR-7977    | 5 |
| <i>circPDE8A</i> | miR-7978    | 2 |
| <i>circPDE8A</i> | miR-8055    | 6 |
| <i>circPDE8A</i> | miR-8057    | 2 |



|                  |                         |   |
|------------------|-------------------------|---|
| <i>circPDE8A</i> | miR-8060                | 5 |
| <i>circPDE8A</i> | miR-8062                | 5 |
| <i>circPDE8A</i> | miR-8063                | 4 |
| <i>circPDE8A</i> | miR-8064                | 3 |
| <i>circPDE8A</i> | miR-8066                | 2 |
| <i>circPDE8A</i> | miR-8077                | 1 |
| <i>circPDE8A</i> | miR-8078                | 3 |
| <i>circPDE8A</i> | miR-8081                | 3 |
| <i>circPDE8A</i> | miR-8083                | 1 |
| <i>circPDE8A</i> | miR-8087                | 1 |
| <i>circPDE8A</i> | miR-874-5p              | 1 |
| <i>circPDE8A</i> | miR-876-3p              | 1 |
| <i>circPDE8A</i> | miR-877-3p              | 1 |
| <i>circPDE8A</i> | miR-885-3p              | 7 |
| <i>circPDE8A</i> | miR-888-3p              | 1 |
| <i>circPDE8A</i> | miR-888-5p              | 1 |
| <i>circPDE8A</i> | miR-889-3p              | 4 |
| <i>circPDE8A</i> | miR-891a-3p             | 5 |
| <i>circPDE8A</i> | miR-924                 | 1 |
| <i>circPDE8A</i> | miR-92a-2-5p            | 3 |
| <i>circPDE8A</i> | miR-93-3p               | 1 |
| <i>circPDE8A</i> | miR-935                 | 3 |
| <i>circPDE8A</i> | miR-939-3p              | 5 |
| <i>circPDE8A</i> | miR-940/6808-5p/6893-5p | 2 |
| <i>circPDE8A</i> | miR-96-3p               | 2 |
| <i>circPDE8A</i> | miR-96-5p/1271-5p       | 2 |
| <i>circPDE8A</i> | miR-126-5p              | 1 |
| <i>circPHC3</i>  | miR-101-3p.1            | 4 |
| <i>circPHC3</i>  | miR-105-3p              | 1 |
| <i>circPHC3</i>  | miR-1179                | 2 |
| <i>circPHC3</i>  | miR-1202/3972           | 1 |
| <i>circPHC3</i>  | miR-1207-3p             | 5 |
| <i>circPHC3</i>  | miR-1224-3p             | 4 |
| <i>circPHC3</i>  | miR-1234-3p/7107-5p     | 1 |
| <i>circPHC3</i>  | miR-1238-3p             | 7 |
| <i>circPHC3</i>  | miR-1245b-3p            | 2 |
| <i>circPHC3</i>  | miR-1246                | 1 |
| <i>circPHC3</i>  | miR-1249-5p/6797-5p     | 2 |

|                 |                                      |   |
|-----------------|--------------------------------------|---|
| <i>circPHC3</i> | miR-1251-3p                          | 3 |
| <i>circPHC3</i> | miR-1253                             | 1 |
| <i>circPHC3</i> | miR-125a-3p                          | 1 |
| <i>circPHC3</i> | miR-126-5p                           | 2 |
| <i>circPHC3</i> | miR-1261                             | 2 |
| <i>circPHC3</i> | miR-1266-3p                          | 2 |
| <i>circPHC3</i> | miR-1273d                            | 2 |
| <i>circPHC3</i> | miR-1273f                            | 2 |
| <i>circPHC3</i> | miR-1279                             | 3 |
| <i>circPHC3</i> | miR-128-3p                           | 3 |
| <i>circPHC3</i> | miR-1288-5p                          | 4 |
| <i>circPHC3</i> | miR-1296-3p                          | 1 |
| <i>circPHC3</i> | miR-1306-5p                          | 4 |
| <i>circPHC3</i> | miR-130b-5p                          | 2 |
| <i>circPHC3</i> | miR-132-3p/212-3p                    | 3 |
| <i>circPHC3</i> | miR-1323                             | 3 |
| <i>circPHC3</i> | miR-136-5p                           | 4 |
| <i>circPHC3</i> | miR-139-5p                           | 1 |
| <i>circPHC3</i> | miR-140-3p.1                         | 4 |
| <i>circPHC3</i> | miR-140-3p.2                         | 4 |
| <i>circPHC3</i> | miR-143-3p                           | 2 |
| <i>circPHC3</i> | miR-144-3p                           | 4 |
| <i>circPHC3</i> | miR-145-3p                           | 2 |
| <i>circPHC3</i> | miR-146-5p                           | 2 |
| <i>circPHC3</i> | miR-146a-3p                          | 1 |
| <i>circPHC3</i> | miR-147a                             | 6 |
| <i>circPHC3</i> | miR-148-3p/152-3p                    | 2 |
| <i>circPHC3</i> | miR-15-5p/16-5p/195-5p/424-5p/497-5p | 4 |
| <i>circPHC3</i> | miR-16-1-3p                          | 3 |
| <i>circPHC3</i> | miR-185-3p                           | 7 |
| <i>circPHC3</i> | miR-185-5p                           | 2 |
| <i>circPHC3</i> | miR-188-5p                           | 2 |
| <i>circPHC3</i> | miR-190a-3p                          | 2 |
| <i>circPHC3</i> | miR-1914-5p                          | 1 |
| <i>circPHC3</i> | miR-194-3p                           | 3 |
| <i>circPHC3</i> | miR-194-5p                           | 2 |
| <i>circPHC3</i> | miR-196-5p                           | 1 |
| <i>circPHC3</i> | miR-199-3p                           | 2 |

|                 |                       |    |
|-----------------|-----------------------|----|
| <i>circPHC3</i> | miR-203a-3p.1         | 1  |
| <i>circPHC3</i> | miR-205-3p            | 2  |
| <i>circPHC3</i> | miR-2053              | 3  |
| <i>circPHC3</i> | miR-2054              | 2  |
| <i>circPHC3</i> | miR-2110              | 1  |
| <i>circPHC3</i> | miR-2113              | 3  |
| <i>circPHC3</i> | miR-2115-3p           | 2  |
| <i>circPHC3</i> | miR-2117              | 1  |
| <i>circPHC3</i> | miR-214-3p/3619-5p    | 11 |
| <i>circPHC3</i> | miR-214-5p            | 1  |
| <i>circPHC3</i> | miR-216a-5p           | 2  |
| <i>circPHC3</i> | miR-216b-5p           | 2  |
| <i>circPHC3</i> | miR-22-3p             | 2  |
| <i>circPHC3</i> | miR-221-3p/222-3p     | 1  |
| <i>circPHC3</i> | miR-222-5p            | 2  |
| <i>circPHC3</i> | miR-223-3p            | 2  |
| <i>circPHC3</i> | miR-23-3p             | 2  |
| <i>circPHC3</i> | miR-2682-3p/6781-3p   | 1  |
| <i>circPHC3</i> | miR-26b-3p            | 3  |
| <i>circPHC3</i> | miR-30-3p             | 3  |
| <i>circPHC3</i> | miR-302c-3p.2/520-3p  | 2  |
| <i>circPHC3</i> | miR-3074-5p           | 2  |
| <i>circPHC3</i> | miR-3119              | 2  |
| <i>circPHC3</i> | miR-3123              | 2  |
| <i>circPHC3</i> | miR-3125/3916/6859-5p | 3  |
| <i>circPHC3</i> | miR-3126-5p           | 2  |
| <i>circPHC3</i> | miR-3134              | 2  |
| <i>circPHC3</i> | miR-3143              | 4  |
| <i>circPHC3</i> | miR-3150a-3p          | 1  |
| <i>circPHC3</i> | miR-3150a-5p/3150b-5p | 4  |
| <i>circPHC3</i> | miR-3150b-3p          | 1  |
| <i>circPHC3</i> | miR-3151-5p           | 1  |
| <i>circPHC3</i> | miR-3157-5p           | 7  |
| <i>circPHC3</i> | miR-3161              | 1  |
| <i>circPHC3</i> | miR-3163              | 3  |
| <i>circPHC3</i> | miR-3173-3p/6891-5p   | 2  |
| <i>circPHC3</i> | miR-3174              | 1  |
| <i>circPHC3</i> | miR-3175              | 1  |

|                 |                                   |   |
|-----------------|-----------------------------------|---|
| <i>circPHC3</i> | miR-3180-5p                       | 3 |
| <i>circPHC3</i> | miR-3182                          | 1 |
| <i>circPHC3</i> | miR-3185                          | 2 |
| <i>circPHC3</i> | miR-3190-3p                       | 2 |
| <i>circPHC3</i> | miR-320                           | 1 |
| <i>circPHC3</i> | miR-3200-5p                       | 1 |
| <i>circPHC3</i> | miR-323-3p                        | 4 |
| <i>circPHC3</i> | miR-330-3p.2                      | 4 |
| <i>circPHC3</i> | miR-338-3p                        | 7 |
| <i>circPHC3</i> | miR-342-3p                        | 4 |
| <i>circPHC3</i> | miR-361-5p                        | 1 |
| <i>circPHC3</i> | miR-3611                          | 2 |
| <i>circPHC3</i> | miR-365-3p                        | 3 |
| <i>circPHC3</i> | miR-3657                          | 1 |
| <i>circPHC3</i> | miR-3660/4526                     | 1 |
| <i>circPHC3</i> | miR-3681-5p                       | 2 |
| <i>circPHC3</i> | miR-3682-5p                       | 3 |
| <i>circPHC3</i> | miR-3688-3p                       | 1 |
| <i>circPHC3</i> | miR-3688-5p                       | 2 |
| <i>circPHC3</i> | miR-3689a-5p/3689b-5p/3689e/3689f | 1 |
| <i>circPHC3</i> | miR-369-3p                        | 2 |
| <i>circPHC3</i> | miR-3692-3p                       | 2 |
| <i>circPHC3</i> | miR-3692-5p                       | 2 |
| <i>circPHC3</i> | miR-370-3p                        | 2 |
| <i>circPHC3</i> | miR-374-5p/655-3p                 | 1 |
| <i>circPHC3</i> | miR-374a-3p                       | 1 |
| <i>circPHC3</i> | miR-376b-5p/376c-5p               | 2 |
| <i>circPHC3</i> | miR-379-5p                        | 1 |
| <i>circPHC3</i> | miR-381-3p                        | 2 |
| <i>circPHC3</i> | miR-3919                          | 1 |
| <i>circPHC3</i> | miR-3925-3p                       | 7 |
| <i>circPHC3</i> | miR-3925-5p                       | 2 |
| <i>circPHC3</i> | miR-3927-3p/6831-5p               | 1 |
| <i>circPHC3</i> | miR-3934-5p                       | 1 |
| <i>circPHC3</i> | miR-3938                          | 2 |
| <i>circPHC3</i> | miR-3976                          | 2 |
| <i>circPHC3</i> | miR-3977                          | 2 |
| <i>circPHC3</i> | miR-410-3p                        | 2 |

|                 |                                    |   |
|-----------------|------------------------------------|---|
| <i>circPHC3</i> | miR-424-3p                         | 1 |
| <i>circPHC3</i> | miR-425-5p                         | 1 |
| <i>circPHC3</i> | miR-4256                           | 1 |
| <i>circPHC3</i> | miR-4267                           | 6 |
| <i>circPHC3</i> | miR-4273/7156-5p                   | 1 |
| <i>circPHC3</i> | miR-4276                           | 4 |
| <i>circPHC3</i> | miR-4286                           | 1 |
| <i>circPHC3</i> | miR-4289                           | 2 |
| <i>circPHC3</i> | miR-4293                           | 2 |
| <i>circPHC3</i> | miR-4301                           | 1 |
| <i>circPHC3</i> | miR-4302                           | 2 |
| <i>circPHC3</i> | miR-4307                           | 2 |
| <i>circPHC3</i> | miR-4326                           | 1 |
| <i>circPHC3</i> | miR-4419a/4510/6127/6129/6130/6133 | 2 |
| <i>circPHC3</i> | miR-4422                           | 4 |
| <i>circPHC3</i> | miR-4426/4647/4662b                | 1 |
| <i>circPHC3</i> | miR-4428                           | 2 |
| <i>circPHC3</i> | miR-4433a-3p                       | 2 |
| <i>circPHC3</i> | miR-4433b-3p                       | 2 |
| <i>circPHC3</i> | miR-4434/4516/5703                 | 1 |
| <i>circPHC3</i> | miR-4438                           | 2 |
| <i>circPHC3</i> | miR-4447/4472                      | 1 |
| <i>circPHC3</i> | miR-4451                           | 1 |
| <i>circPHC3</i> | miR-4453/4538                      | 1 |
| <i>circPHC3</i> | miR-4457                           | 2 |
| <i>circPHC3</i> | miR-4459                           | 2 |
| <i>circPHC3</i> | miR-4474-3p                        | 2 |
| <i>circPHC3</i> | miR-4485-3p                        | 2 |
| <i>circPHC3</i> | miR-4493                           | 2 |
| <i>circPHC3</i> | miR-452-3p                         | 1 |
| <i>circPHC3</i> | miR-452-5p/892-3p                  | 2 |
| <i>circPHC3</i> | miR-4528                           | 1 |
| <i>circPHC3</i> | miR-4530                           | 7 |
| <i>circPHC3</i> | miR-4534/8082                      | 2 |
| <i>circPHC3</i> | miR-454-5p                         | 2 |
| <i>circPHC3</i> | miR-4639-5p                        | 1 |
| <i>circPHC3</i> | miR-4642                           | 2 |
| <i>circPHC3</i> | miR-4650-3p                        | 1 |

|                 |                     |   |
|-----------------|---------------------|---|
| <i>circPHC3</i> | miR-4652-3p         | 2 |
| <i>circPHC3</i> | miR-466             | 6 |
| <i>circPHC3</i> | miR-4660            | 2 |
| <i>circPHC3</i> | miR-4666a-3p        | 2 |
| <i>circPHC3</i> | miR-4669            | 1 |
| <i>circPHC3</i> | miR-4677-3p         | 1 |
| <i>circPHC3</i> | miR-4677-5p         | 1 |
| <i>circPHC3</i> | miR-4679            | 1 |
| <i>circPHC3</i> | miR-4684-5p         | 3 |
| <i>circPHC3</i> | miR-4691-3p         | 6 |
| <i>circPHC3</i> | miR-4693-5p         | 1 |
| <i>circPHC3</i> | miR-4695-5p         | 2 |
| <i>circPHC3</i> | miR-4697-3p         | 2 |
| <i>circPHC3</i> | miR-4699-5p         | 2 |
| <i>circPHC3</i> | miR-4704-3p         | 4 |
| <i>circPHC3</i> | miR-4708-5p         | 2 |
| <i>circPHC3</i> | miR-4709-3p         | 1 |
| <i>circPHC3</i> | miR-4711-5p         | 2 |
| <i>circPHC3</i> | miR-4715-3p         | 2 |
| <i>circPHC3</i> | miR-4716-5p         | 2 |
| <i>circPHC3</i> | miR-4717-3p         | 2 |
| <i>circPHC3</i> | miR-4743-3p         | 2 |
| <i>circPHC3</i> | miR-4754            | 1 |
| <i>circPHC3</i> | miR-4756-3p         | 1 |
| <i>circPHC3</i> | miR-4757-5p/6744-3p | 1 |
| <i>circPHC3</i> | miR-4760-3p         | 9 |
| <i>circPHC3</i> | miR-4762-3p         | 1 |
| <i>circPHC3</i> | miR-4766-3p         | 1 |
| <i>circPHC3</i> | miR-4766-5p         | 1 |
| <i>circPHC3</i> | miR-4768-3p         | 2 |
| <i>circPHC3</i> | miR-4768-5p/6833-3p | 4 |
| <i>circPHC3</i> | miR-4769-3p/6817-5p | 2 |
| <i>circPHC3</i> | miR-4773            | 3 |
| <i>circPHC3</i> | miR-4775            | 7 |
| <i>circPHC3</i> | miR-4779            | 2 |
| <i>circPHC3</i> | miR-4785            | 1 |
| <i>circPHC3</i> | miR-4797-5p         | 1 |
| <i>circPHC3</i> | miR-484/3155        | 4 |

|                 |                                                                  |   |
|-----------------|------------------------------------------------------------------|---|
| <i>circPHC3</i> | miR-486-5p                                                       | 1 |
| <i>circPHC3</i> | miR-488-3p                                                       | 1 |
| <i>circPHC3</i> | miR-491-5p                                                       | 1 |
| <i>circPHC3</i> | miR-495-3p                                                       | 3 |
| <i>circPHC3</i> | miR-497-3p                                                       | 2 |
| <i>circPHC3</i> | miR-5004-3p                                                      | 3 |
| <i>circPHC3</i> | miR-5006-5p                                                      | 1 |
| <i>circPHC3</i> | miR-5007-5p                                                      | 2 |
| <i>circPHC3</i> | miR-500b-3p                                                      | 2 |
| <i>circPHC3</i> | miR-501-3p/502-3p                                                | 2 |
| <i>circPHC3</i> | miR-5010-3p                                                      | 3 |
| <i>circPHC3</i> | miR-503-5p                                                       | 4 |
| <i>circPHC3</i> | miR-504-3p                                                       | 1 |
| <i>circPHC3</i> | miR-506-5p                                                       | 9 |
| <i>circPHC3</i> | miR-509-3p                                                       | 2 |
| <i>circPHC3</i> | miR-5094                                                         | 2 |
| <i>circPHC3</i> | miR-5100                                                         | 3 |
| <i>circPHC3</i> | miR-511-3p                                                       | 2 |
| <i>circPHC3</i> | miR-512-3p                                                       | 2 |
| <i>circPHC3</i> | miR-515-5p/519e-5p                                               | 7 |
| <i>circPHC3</i> | miR-5190                                                         | 3 |
| <i>circPHC3</i> | miR-5191                                                         | 1 |
| <i>circPHC3</i> | miR-5192                                                         | 2 |
| <i>circPHC3</i> | miR-5197-3p                                                      | 6 |
| <i>circPHC3</i> | miR-520f-5p                                                      | 3 |
| <i>circPHC3</i> | miR-524-5p                                                       | 1 |
| <i>circPHC3</i> | miR-541-5p                                                       | 2 |
| <i>circPHC3</i> | miR-543                                                          | 5 |
| <i>circPHC3</i> | miR-545-5p                                                       | 2 |
| <i>circPHC3</i> | miR-548ac/548bb-3p/548d-3p/548h-3p/548z                          |   |
| <i>circPHC3</i> | miR-548ad-3p                                                     | 1 |
| <i>circPHC3</i> | miR-548aq-3p/548am-3p/548aj-3p/548ah-3p/548ae-3p/548j-3p/548x-3p |   |
| <i>circPHC3</i> | miR-548at-5p                                                     | 4 |
| <i>circPHC3</i> | miR-548az-5p/548t-5p                                             | 1 |
| <i>circPHC3</i> | miR-548e-5p                                                      | 4 |
| <i>circPHC3</i> | miR-548n                                                         | 1 |
| <i>circPHC3</i> | miR-548v                                                         | 1 |
| <i>circPHC3</i> | miR-553                                                          | 1 |

|                 |                 |   |
|-----------------|-----------------|---|
| <i>circPHC3</i> | miR-556-3p      | 4 |
| <i>circPHC3</i> | miR-5580-3p     | 1 |
| <i>circPHC3</i> | miR-561-3p      | 4 |
| <i>circPHC3</i> | miR-562         | 1 |
| <i>circPHC3</i> | miR-5680        | 2 |
| <i>circPHC3</i> | miR-5683        | 2 |
| <i>circPHC3</i> | miR-5687        | 2 |
| <i>circPHC3</i> | miR-5690        | 3 |
| <i>circPHC3</i> | miR-5692bc      | 2 |
| <i>circPHC3</i> | miR-5693        | 3 |
| <i>circPHC3</i> | miR-5701        | 3 |
| <i>circPHC3</i> | miR-5702        | 2 |
| <i>circPHC3</i> | miR-575/4676-5p | 4 |
| <i>circPHC3</i> | miR-576-3p      | 2 |
| <i>circPHC3</i> | miR-584-3p      | 2 |
| <i>circPHC3</i> | miR-589-5p      | 2 |
| <i>circPHC3</i> | miR-590-3p      | 5 |
| <i>circPHC3</i> | miR-592         | 3 |
| <i>circPHC3</i> | miR-596         | 2 |
| <i>circPHC3</i> | miR-599         | 3 |
| <i>circPHC3</i> | miR-600         | 1 |
| <i>circPHC3</i> | miR-605-3p      | 2 |
| <i>circPHC3</i> | miR-6077        | 1 |
| <i>circPHC3</i> | miR-6079        | 1 |
| <i>circPHC3</i> | miR-6083        | 1 |
| <i>circPHC3</i> | miR-610         | 1 |
| <i>circPHC3</i> | miR-6126        | 2 |
| <i>circPHC3</i> | miR-617         | 1 |
| <i>circPHC3</i> | miR-624-3p      | 2 |
| <i>circPHC3</i> | miR-627-5p      | 1 |
| <i>circPHC3</i> | miR-628-5p      | 1 |
| <i>circPHC3</i> | miR-633         | 4 |
| <i>circPHC3</i> | miR-636         | 2 |
| <i>circPHC3</i> | miR-641/3617-5p | 1 |
| <i>circPHC3</i> | miR-642-3p      | 1 |
| <i>circPHC3</i> | miR-642a-5p     | 2 |
| <i>circPHC3</i> | miR-643         | 1 |
| <i>circPHC3</i> | miR-646         | 4 |



|                 |                  |   |
|-----------------|------------------|---|
| <i>circPHC3</i> | miR-648          | 1 |
| <i>circPHC3</i> | miR-6501-3p      | 1 |
| <i>circPHC3</i> | miR-6505-3p      | 1 |
| <i>circPHC3</i> | miR-6505-5p      | 2 |
| <i>circPHC3</i> | miR-6513-3p      | 3 |
| <i>circPHC3</i> | miR-656-3p       | 3 |
| <i>circPHC3</i> | miR-660-5p       | 2 |
| <i>circPHC3</i> | miR-664a-3p      | 2 |
| <i>circPHC3</i> | miR-665          | 2 |
| <i>circPHC3</i> | miR-670-3p       | 7 |
| <i>circPHC3</i> | miR-6715a-3p     | 2 |
| <i>circPHC3</i> | miR-6719-3p      | 1 |
| <i>circPHC3</i> | miR-6720-5p      | 8 |
| <i>circPHC3</i> | miR-6730-3p      | 1 |
| <i>circPHC3</i> | miR-6731-5p/8085 | 1 |
| <i>circPHC3</i> | miR-6733-3p      | 2 |
| <i>circPHC3</i> | miR-6742-5p      | 1 |
| <i>circPHC3</i> | miR-6757-5p      | 2 |
| <i>circPHC3</i> | miR-6768-5p      | 1 |
| <i>circPHC3</i> | miR-6770-5p      | 1 |
| <i>circPHC3</i> | miR-6776-3p      | 2 |
| <i>circPHC3</i> | miR-6780a-3p     | 4 |
| <i>circPHC3</i> | miR-6809-3p      | 4 |
| <i>circPHC3</i> | miR-6810-5p      | 1 |
| <i>circPHC3</i> | miR-6811-3p      | 1 |
| <i>circPHC3</i> | miR-6818-3p      | 4 |
| <i>circPHC3</i> | miR-6818-5p      | 6 |
| <i>circPHC3</i> | miR-6825-5p      | 1 |
| <i>circPHC3</i> | miR-6830-5p      | 2 |
| <i>circPHC3</i> | miR-6844         | 1 |
| <i>circPHC3</i> | miR-6850-5p      | 1 |
| <i>circPHC3</i> | miR-6856-3p      | 1 |
| <i>circPHC3</i> | miR-6857-5p      | 1 |
| <i>circPHC3</i> | miR-6858-3p      | 4 |
| <i>circPHC3</i> | miR-6864-5p      | 2 |
| <i>circPHC3</i> | miR-6867-5p      | 6 |
| <i>circPHC3</i> | miR-6874-5p      | 2 |
| <i>circPHC3</i> | miR-6878-5p      | 1 |

|                 |                       |    |
|-----------------|-----------------------|----|
| <i>circPHC3</i> | miR-6881-3p           | 4  |
| <i>circPHC3</i> | miR-6882-3p           | 2  |
| <i>circPHC3</i> | miR-6884-3p           | 4  |
| <i>circPHC3</i> | miR-6885-3p           | 1  |
| <i>circPHC3</i> | miR-6888-5p           | 2  |
| <i>circPHC3</i> | miR-7-5p              | 1  |
| <i>circPHC3</i> | miR-7108-5p           | 2  |
| <i>circPHC3</i> | miR-7111-3p           | 4  |
| <i>circPHC3</i> | miR-7112-3p           | 2  |
| <i>circPHC3</i> | miR-7114-5p           | 2  |
| <i>circPHC3</i> | miR-7152-5p           | 2  |
| <i>circPHC3</i> | miR-758-3p            | 2  |
| <i>circPHC3</i> | miR-766-3p            | 7  |
| <i>circPHC3</i> | miR-7850-5p           | 2  |
| <i>circPHC3</i> | miR-7977              | 6  |
| <i>circPHC3</i> | miR-802               | 2  |
| <i>circPHC3</i> | miR-8066              | 1  |
| <i>circPHC3</i> | miR-8068              | 1  |
| <i>circPHC3</i> | miR-8070              | 2  |
| <i>circPHC3</i> | miR-891a-3p           | 2  |
| <i>circPHC3</i> | miR-892-5p            | 9  |
| <i>circPHC3</i> | miR-892b              | 9  |
| <i>circPHC3</i> | miR-922               | 11 |
| <i>circPHC3</i> | miR-93-3p             | 2  |
| <i>circPHC3</i> | miR-936               | 2  |
| <i>circPHC3</i> | miR-937-5p            | 1  |
| <i>circPHC3</i> | miR-939-5p/1343-5p    | 1  |
| <i>circPHC3</i> | miR-942-5p            | 4  |
| <i>circPHC3</i> | let-7a-2-3p/let-7g-3p | 3  |
| <i>circPHC3</i> | let-7c-3p             | 3  |
| <i>circPHC3</i> | miR-1-3p/206          | 1  |
| <i>circPHC3</i> | miR-100-3p            | 2  |
| <i>circPHC3</i> | miR-103-3p/107        | 4  |
| <i>circPHC3</i> | miR-1180-5p           | 3  |
| <i>circPHC3</i> | miR-1183              | 2  |
| <i>circPHC3</i> | miR-1184              | 3  |
| <i>circPHC3</i> | miR-1193              | 1  |
| <i>circPHC3</i> | miR-1205              | 3  |

|                 |                          |   |
|-----------------|--------------------------|---|
| <i>circPHC3</i> | miR-1208                 | 2 |
| <i>circPHC3</i> | miR-1226-3p              | 4 |
| <i>circPHC3</i> | miR-1228-3p              | 3 |
| <i>circPHC3</i> | miR-1236-3p              | 5 |
| <i>circPHC3</i> | miR-1255b-2-3p           | 3 |
| <i>circPHC3</i> | miR-1267                 | 4 |
| <i>circPHC3</i> | miR-1273g-3p             | 2 |
| <i>circPHC3</i> | miR-1273g-5p             | 1 |
| <i>circPHC3</i> | miR-1273h-3p             | 3 |
| <i>circPHC3</i> | miR-1283                 | 2 |
| <i>circPHC3</i> | miR-1298-5p              | 7 |
| <i>circPHC3</i> | miR-130-3p/301-3p/454-3p | 3 |
| <i>circPHC3</i> | miR-1301-3p              | 2 |
| <i>circPHC3</i> | miR-133a-3p.1            | 5 |
| <i>circPHC3</i> | miR-133a-3p.2/133b       | 2 |
| <i>circPHC3</i> | miR-140-5p               | 1 |
| <i>circPHC3</i> | miR-141-5p               | 4 |
| <i>circPHC3</i> | miR-142-3p.1             | 1 |
| <i>circPHC3</i> | miR-143-5p               | 3 |
| <i>circPHC3</i> | miR-145-5p               | 5 |
| <i>circPHC3</i> | miR-150-5p               | 5 |
| <i>circPHC3</i> | miR-155-3p               | 3 |
| <i>circPHC3</i> | miR-155-5p               | 2 |
| <i>circPHC3</i> | miR-16-2-3p/195-3p       | 1 |
| <i>circPHC3</i> | miR-17-3p                | 3 |
| <i>circPHC3</i> | miR-1825                 | 2 |
| <i>circPHC3</i> | miR-18a-3p               | 1 |
| <i>circPHC3</i> | miR-19-3p                | 3 |
| <i>circPHC3</i> | miR-19-5p                | 1 |
| <i>circPHC3</i> | miR-1910-5p              | 2 |
| <i>circPHC3</i> | miR-1911-3p              | 5 |
| <i>circPHC3</i> | miR-1915-3p/6764-5p      | 4 |
| <i>circPHC3</i> | miR-1915-5p              | 1 |
| <i>circPHC3</i> | miR-197-3p               | 4 |
| <i>circPHC3</i> | miR-1972                 | 1 |
| <i>circPHC3</i> | miR-198                  | 2 |
| <i>circPHC3</i> | miR-199-5p               | 2 |
| <i>circPHC3</i> | miR-203a-5p              | 1 |

|                 |                                     |    |
|-----------------|-------------------------------------|----|
| <i>circPHC3</i> | miR-203b-5p/6718-5p                 | 2  |
| <i>circPHC3</i> | miR-205-5p                          | 1  |
| <i>circPHC3</i> | miR-2052                            | 1  |
| <i>circPHC3</i> | miR-208-5p                          | 2  |
| <i>circPHC3</i> | miR-20b-3p                          | 1  |
| <i>circPHC3</i> | miR-2115-5p                         | 3  |
| <i>circPHC3</i> | miR-2116-3p                         | 5  |
| <i>circPHC3</i> | miR-212-5p                          | 1  |
| <i>circPHC3</i> | miR-216b-3p                         | 1  |
| <i>circPHC3</i> | miR-219-5p                          | 1  |
| <i>circPHC3</i> | miR-219b-5p                         | 1  |
| <i>circPHC3</i> | miR-224-5p                          | 1  |
| <i>circPHC3</i> | miR-2276-5p                         | 2  |
| <i>circPHC3</i> | miR-2355-5p                         | 1  |
| <i>circPHC3</i> | miR-25-3p/32-5p/92-3p/363-3p/367-3p | 1  |
| <i>circPHC3</i> | miR-27-3p                           | 4  |
| <i>circPHC3</i> | miR-29-3p                           | 2  |
| <i>circPHC3</i> | miR-298                             | 3  |
| <i>circPHC3</i> | miR-299-5p                          | 1  |
| <i>circPHC3</i> | miR-29b-1-5p                        | 3  |
| <i>circPHC3</i> | miR-29b-2-5p                        | 1  |
| <i>circPHC3</i> | miR-30-5p                           | 2  |
| <i>circPHC3</i> | miR-302-3p/372-3p/373-3p/520-3p     | 3  |
| <i>circPHC3</i> | miR-302b-5p/302d-5p                 | 2  |
| <i>circPHC3</i> | miR-302c-5p                         | 4  |
| <i>circPHC3</i> | miR-302f                            | 1  |
| <i>circPHC3</i> | miR-3064-3p                         | 2  |
| <i>circPHC3</i> | miR-3065-3p                         | 6  |
| <i>circPHC3</i> | miR-3120-3p                         | 10 |
| <i>circPHC3</i> | miR-3121-5p                         | 1  |
| <i>circPHC3</i> | miR-3127-5p                         | 1  |
| <i>circPHC3</i> | miR-3130-3p                         | 3  |
| <i>circPHC3</i> | miR-3136-3p/7155-3p                 | 1  |
| <i>circPHC3</i> | miR-3137                            | 1  |
| <i>circPHC3</i> | miR-3140-5p                         | 1  |
| <i>circPHC3</i> | miR-3144-3p                         | 2  |
| <i>circPHC3</i> | miR-3145-3p                         | 3  |
| <i>circPHC3</i> | miR-3145-5p                         | 2  |

|                 |                           |   |
|-----------------|---------------------------|---|
| <i>circPHC3</i> | miR-3157-3p               | 1 |
| <i>circPHC3</i> | miR-3158-5p               | 3 |
| <i>circPHC3</i> | miR-3183/4723-3p/6769b-3p | 4 |
| <i>circPHC3</i> | miR-3189-3p               | 1 |
| <i>circPHC3</i> | miR-3194-5p               | 1 |
| <i>circPHC3</i> | miR-324-3p/1913           | 1 |
| <i>circPHC3</i> | miR-328-3p                | 1 |
| <i>circPHC3</i> | miR-33-5p                 | 1 |
| <i>circPHC3</i> | miR-331-3p                | 1 |
| <i>circPHC3</i> | miR-339-5p                | 1 |
| <i>circPHC3</i> | miR-345-3p                | 1 |
| <i>circPHC3</i> | miR-346                   | 1 |
| <i>circPHC3</i> | miR-34a-3p                | 7 |
| <i>circPHC3</i> | miR-3529-3p               | 3 |
| <i>circPHC3</i> | miR-361-3p                | 3 |
| <i>circPHC3</i> | miR-3613-5p               | 1 |
| <i>circPHC3</i> | miR-3614-3p               | 1 |
| <i>circPHC3</i> | miR-3617-3p               | 7 |
| <i>circPHC3</i> | miR-362-5p/500b-5p        | 2 |
| <i>circPHC3</i> | miR-3622a-3p/3622b-3p     | 5 |
| <i>circPHC3</i> | miR-3667-3p               | 5 |
| <i>circPHC3</i> | miR-3667-5p               | 3 |
| <i>circPHC3</i> | miR-367-5p                | 4 |
| <i>circPHC3</i> | miR-3678-3p               | 3 |
| <i>circPHC3</i> | miR-3679-3p               | 2 |
| <i>circPHC3</i> | miR-3680-3p               | 1 |
| <i>circPHC3</i> | miR-3686                  | 1 |
| <i>circPHC3</i> | miR-3691-3p               | 1 |
| <i>circPHC3</i> | miR-3713                  | 1 |
| <i>circPHC3</i> | miR-374-5p                | 2 |
| <i>circPHC3</i> | miR-375                   | 3 |
| <i>circPHC3</i> | miR-377-3p                | 4 |
| <i>circPHC3</i> | miR-383-3p                | 6 |
| <i>circPHC3</i> | miR-3908                  | 1 |
| <i>circPHC3</i> | miR-3909                  | 2 |
| <i>circPHC3</i> | miR-3913-3p               | 2 |
| <i>circPHC3</i> | miR-3914                  | 2 |
| <i>circPHC3</i> | miR-3918                  | 2 |

|                 |                       |   |
|-----------------|-----------------------|---|
| <i>circPHC3</i> | miR-3926              | 1 |
| <i>circPHC3</i> | miR-3928-3p           | 2 |
| <i>circPHC3</i> | miR-3928-5p/6806-3p   | 2 |
| <i>circPHC3</i> | miR-3934-3p           | 1 |
| <i>circPHC3</i> | miR-3941              | 1 |
| <i>circPHC3</i> | miR-3942-3p           | 6 |
| <i>circPHC3</i> | miR-3942-5p           | 1 |
| <i>circPHC3</i> | miR-3944-5p           | 2 |
| <i>circPHC3</i> | miR-3973              | 4 |
| <i>circPHC3</i> | miR-3974              | 1 |
| <i>circPHC3</i> | miR-4270/4441/6754-5p | 1 |
| <i>circPHC3</i> | miR-4272              | 3 |
| <i>circPHC3</i> | miR-4274              | 3 |
| <i>circPHC3</i> | miR-4277              | 7 |
| <i>circPHC3</i> | miR-4279              | 5 |
| <i>circPHC3</i> | miR-4291              | 5 |
| <i>circPHC3</i> | miR-4297/5581-5p      | 3 |
| <i>circPHC3</i> | miR-4310/7157-5p      | 2 |
| <i>circPHC3</i> | miR-4312              | 1 |
| <i>circPHC3</i> | miR-4330              | 1 |
| <i>circPHC3</i> | miR-4423-5p           | 2 |
| <i>circPHC3</i> | miR-4433a-5p          | 1 |
| <i>circPHC3</i> | miR-4433b-5p          | 3 |
| <i>circPHC3</i> | miR-4436b-5p          | 3 |
| <i>circPHC3</i> | miR-4445-5p           | 1 |
| <i>circPHC3</i> | miR-4446-5p           | 3 |
| <i>circPHC3</i> | miR-4460              | 1 |
| <i>circPHC3</i> | miR-4463              | 2 |
| <i>circPHC3</i> | miR-4464/4748         | 1 |
| <i>circPHC3</i> | miR-4477b             | 2 |
| <i>circPHC3</i> | miR-4494              | 4 |
| <i>circPHC3</i> | miR-4499              | 2 |
| <i>circPHC3</i> | miR-450b-5p           | 1 |
| <i>circPHC3</i> | miR-4512              | 2 |
| <i>circPHC3</i> | miR-4519              | 3 |
| <i>circPHC3</i> | miR-4522              | 2 |
| <i>circPHC3</i> | miR-4539              | 1 |
| <i>circPHC3</i> | miR-455-3p.1          | 2 |

|                 |                       |   |
|-----------------|-----------------------|---|
| <i>circPHC3</i> | miR-455-3p.2          | 3 |
| <i>circPHC3</i> | miR-4640-3p           | 3 |
| <i>circPHC3</i> | miR-4640-5p           | 2 |
| <i>circPHC3</i> | miR-4643              | 1 |
| <i>circPHC3</i> | miR-4645-5p/4673      | 5 |
| <i>circPHC3</i> | miR-4650-5p           | 1 |
| <i>circPHC3</i> | miR-4659a-5p/4659b-5p | 2 |
| <i>circPHC3</i> | miR-4672              | 1 |
| <i>circPHC3</i> | miR-4685-5p/6837-5p   | 2 |
| <i>circPHC3</i> | miR-4686              | 1 |
| <i>circPHC3</i> | miR-4691-5p/6792-3p   | 9 |
| <i>circPHC3</i> | miR-4705              | 3 |
| <i>circPHC3</i> | miR-4709-5p           | 6 |
| <i>circPHC3</i> | miR-4711-3p           | 2 |
| <i>circPHC3</i> | miR-4717-5p           | 1 |
| <i>circPHC3</i> | miR-4719              | 1 |
| <i>circPHC3</i> | miR-4726-3p           | 4 |
| <i>circPHC3</i> | miR-4727-3p           | 1 |
| <i>circPHC3</i> | miR-4727-5p           | 1 |
| <i>circPHC3</i> | miR-4733-3p           | 4 |
| <i>circPHC3</i> | miR-4733-5p           | 5 |
| <i>circPHC3</i> | miR-4742-3p           | 2 |
| <i>circPHC3</i> | miR-4753-3p           | 1 |
| <i>circPHC3</i> | miR-4755-3p           | 2 |
| <i>circPHC3</i> | miR-4776-3p           | 2 |
| <i>circPHC3</i> | miR-4778-5p           | 2 |
| <i>circPHC3</i> | miR-4780              | 2 |
| <i>circPHC3</i> | miR-4789-3p           | 1 |
| <i>circPHC3</i> | miR-4793-3p           | 3 |
| <i>circPHC3</i> | miR-4793-5p           | 1 |
| <i>circPHC3</i> | miR-4796-5p           | 1 |
| <i>circPHC3</i> | miR-483-3p.2          | 2 |
| <i>circPHC3</i> | miR-493-5p            | 3 |
| <i>circPHC3</i> | miR-499a-3p/499b-3p   | 3 |
| <i>circPHC3</i> | miR-499b-5p           | 4 |
| <i>circPHC3</i> | miR-5000-5p           | 2 |
| <i>circPHC3</i> | miR-5001-3p           | 1 |
| <i>circPHC3</i> | miR-5007-3p           | 3 |

|                 |                             |   |
|-----------------|-----------------------------|---|
| <i>circPHC3</i> | miR-501-5p                  | 2 |
| <i>circPHC3</i> | miR-507/557                 | 1 |
| <i>circPHC3</i> | miR-508-3p                  | 1 |
| <i>circPHC3</i> | miR-508-5p                  | 2 |
| <i>circPHC3</i> | miR-5092                    | 2 |
| <i>circPHC3</i> | miR-513a-3p/513c-3p/3606-3p | 3 |
| <i>circPHC3</i> | miR-513a-5p                 | 4 |
| <i>circPHC3</i> | miR-516a-3p/516b-3p/7162-5p | 3 |
| <i>circPHC3</i> | miR-519-3p                  | 3 |
| <i>circPHC3</i> | miR-5193                    | 2 |
| <i>circPHC3</i> | miR-5196-3p                 | 1 |
| <i>circPHC3</i> | miR-519d-5p                 | 4 |
| <i>circPHC3</i> | miR-520g-3p                 | 4 |
| <i>circPHC3</i> | miR-525-5p                  | 2 |
| <i>circPHC3</i> | miR-532-3p                  | 5 |
| <i>circPHC3</i> | miR-548ao-3p                | 3 |
| <i>circPHC3</i> | miR-548p                    | 3 |
| <i>circPHC3</i> | miR-552-5p                  | 5 |
| <i>circPHC3</i> | miR-5571-5p                 | 2 |
| <i>circPHC3</i> | miR-5584-5p                 | 1 |
| <i>circPHC3</i> | miR-5590-5p                 | 2 |
| <i>circPHC3</i> | miR-568                     | 2 |
| <i>circPHC3</i> | miR-5695                    | 4 |
| <i>circPHC3</i> | miR-5700                    | 1 |
| <i>circPHC3</i> | miR-581                     | 2 |
| <i>circPHC3</i> | miR-582-3p                  | 1 |
| <i>circPHC3</i> | miR-586                     | 1 |
| <i>circPHC3</i> | miR-587                     | 2 |
| <i>circPHC3</i> | miR-589-3p                  | 2 |
| <i>circPHC3</i> | miR-593-3p                  | 1 |
| <i>circPHC3</i> | miR-597-5p                  | 3 |
| <i>circPHC3</i> | miR-6072/6891-3p            | 4 |
| <i>circPHC3</i> | miR-6073                    | 1 |
| <i>circPHC3</i> | miR-6074                    | 4 |
| <i>circPHC3</i> | miR-622                     | 5 |
| <i>circPHC3</i> | miR-625-3p                  | 1 |
| <i>circPHC3</i> | miR-629-3p                  | 6 |
| <i>circPHC3</i> | miR-634                     | 3 |



|                 |                     |   |
|-----------------|---------------------|---|
| <i>circPHC3</i> | miR-640             | 1 |
| <i>circPHC3</i> | miR-6501-5p         | 2 |
| <i>circPHC3</i> | miR-6504-3p         | 3 |
| <i>circPHC3</i> | miR-6508-3p         | 2 |
| <i>circPHC3</i> | miR-6509-3p         | 3 |
| <i>circPHC3</i> | miR-6515-3p         | 5 |
| <i>circPHC3</i> | miR-6516-5p         | 2 |
| <i>circPHC3</i> | miR-660-3p          | 2 |
| <i>circPHC3</i> | miR-670-5p          | 1 |
| <i>circPHC3</i> | miR-6716-5p         | 1 |
| <i>circPHC3</i> | miR-6729-3p         | 6 |
| <i>circPHC3</i> | miR-6734-3p         | 5 |
| <i>circPHC3</i> | miR-6736-3p         | 4 |
| <i>circPHC3</i> | miR-6739-3p         | 2 |
| <i>circPHC3</i> | miR-6749-3p         | 9 |
| <i>circPHC3</i> | miR-6750-3p         | 4 |
| <i>circPHC3</i> | miR-6750-5p/6822-5p | 1 |
| <i>circPHC3</i> | miR-6752-3p         | 1 |
| <i>circPHC3</i> | miR-6758-3p         | 4 |
| <i>circPHC3</i> | miR-676-5p          | 3 |
| <i>circPHC3</i> | miR-6760-3p         | 2 |
| <i>circPHC3</i> | miR-6765-3p         | 5 |
| <i>circPHC3</i> | miR-6777-3p         | 2 |
| <i>circPHC3</i> | miR-6780b-3p        | 2 |
| <i>circPHC3</i> | miR-6801-3p/6810-3p | 1 |
| <i>circPHC3</i> | miR-6801-5p         | 1 |
| <i>circPHC3</i> | miR-6804-3p         | 2 |
| <i>circPHC3</i> | miR-6819-3p/6877-3p | 3 |
| <i>circPHC3</i> | miR-6826-3p         | 3 |
| <i>circPHC3</i> | miR-6830-3p         | 2 |
| <i>circPHC3</i> | miR-6838-3p         | 2 |
| <i>circPHC3</i> | miR-6840-3p         | 4 |
| <i>circPHC3</i> | miR-6841-3p         | 1 |
| <i>circPHC3</i> | miR-6845-3p         | 4 |
| <i>circPHC3</i> | miR-6849-3p         | 2 |
| <i>circPHC3</i> | miR-6854-5p         | 7 |
| <i>circPHC3</i> | miR-6865-3p         | 1 |
| <i>circPHC3</i> | miR-6871-3p         | 2 |

|                 |                |    |
|-----------------|----------------|----|
| <i>circPHC3</i> | miR-6873-3p    | 1  |
| <i>circPHC3</i> | miR-6878-3p    | 2  |
| <i>circPHC3</i> | miR-6882-5p    | 3  |
| <i>circPHC3</i> | miR-6886-3p    | 1  |
| <i>circPHC3</i> | miR-6888-3p    | 2  |
| <i>circPHC3</i> | miR-6890-3p    | 2  |
| <i>circPHC3</i> | miR-6892-3p    | 2  |
| <i>circPHC3</i> | miR-6895-3p    | 1  |
| <i>circPHC3</i> | miR-6895-5p    | 2  |
| <i>circPHC3</i> | miR-7106-3p    | 2  |
| <i>circPHC3</i> | miR-7113-5p    | 2  |
| <i>circPHC3</i> | miR-7153-3p    | 2  |
| <i>circPHC3</i> | miR-7156-3p    | 2  |
| <i>circPHC3</i> | miR-7160-3p    | 2  |
| <i>circPHC3</i> | miR-744-3p     | 2  |
| <i>circPHC3</i> | miR-759        | 1  |
| <i>circPHC3</i> | miR-8075       | 3  |
| <i>circPHC3</i> | miR-874-3p     | 1  |
| <i>circPHC3</i> | miR-877-3p     | 2  |
| <i>circPHC3</i> | miR-888-5p     | 3  |
| <i>circPHC3</i> | miR-9-5p       | 3  |
| <i>circPHC3</i> | miR-935        | 10 |
| <i>circPHC3</i> | miR-938        | 1  |
| <i>circPHC3</i> | miR-944        | 1  |
| <i>circPHC3</i> | miR-9500       | 1  |
| <i>circPHC3</i> | let-7-5p/98-5p | 1  |
| <i>circPHC3</i> | miR-1-5p       | 1  |
| <i>circPHC3</i> | miR-101-3p.2   | 2  |
| <i>circPHC3</i> | miR-101-5p     | 2  |
| <i>circPHC3</i> | miR-103a-2-5p  | 1  |
| <i>circPHC3</i> | miR-105-5p     | 3  |
| <i>circPHC3</i> | miR-1178-3p    | 2  |
| <i>circPHC3</i> | miR-1180-3p    | 1  |
| <i>circPHC3</i> | miR-1185-5p    | 1  |
| <i>circPHC3</i> | miR-1200       | 1  |
| <i>circPHC3</i> | miR-1206       | 1  |
| <i>circPHC3</i> | miR-1224-5p    | 1  |
| <i>circPHC3</i> | miR-1229-3p    | 1  |

|                 |                          |   |
|-----------------|--------------------------|---|
| <i>circPHC3</i> | miR-1231                 | 1 |
| <i>circPHC3</i> | miR-1233-3p              | 2 |
| <i>circPHC3</i> | miR-1236-5p              | 1 |
| <i>circPHC3</i> | miR-1237-3p              | 2 |
| <i>circPHC3</i> | miR-124-3p.1             | 1 |
| <i>circPHC3</i> | miR-124-5p               | 1 |
| <i>circPHC3</i> | miR-1243                 | 1 |
| <i>circPHC3</i> | miR-1245a/8079           | 2 |
| <i>circPHC3</i> | miR-1248                 | 2 |
| <i>circPHC3</i> | miR-1250-3p              | 3 |
| <i>circPHC3</i> | miR-1252-3p              | 1 |
| <i>circPHC3</i> | miR-1254/3116            | 3 |
| <i>circPHC3</i> | miR-125b-1-3p            | 1 |
| <i>circPHC3</i> | miR-125b-2-3p            | 1 |
| <i>circPHC3</i> | miR-1260a/1260b          | 1 |
| <i>circPHC3</i> | miR-1262/4701-3p/6736-5p | 4 |
| <i>circPHC3</i> | miR-1263                 | 2 |
| <i>circPHC3</i> | miR-1264                 | 1 |
| <i>circPHC3</i> | miR-1265                 | 1 |
| <i>circPHC3</i> | miR-1268a/1268b          | 1 |
| <i>circPHC3</i> | miR-1269                 | 1 |
| <i>circPHC3</i> | miR-1277-5p              | 5 |
| <i>circPHC3</i> | miR-1278                 | 3 |
| <i>circPHC3</i> | miR-1284                 | 1 |
| <i>circPHC3</i> | miR-1285-5p              | 1 |
| <i>circPHC3</i> | miR-1287-3p              | 4 |
| <i>circPHC3</i> | miR-1288-3p              | 1 |
| <i>circPHC3</i> | miR-129-5p               | 7 |
| <i>circPHC3</i> | miR-1290                 | 1 |
| <i>circPHC3</i> | miR-1291/6775-3p         | 1 |
| <i>circPHC3</i> | miR-1295b-5p/1912        | 2 |
| <i>circPHC3</i> | miR-1298-3p              | 1 |
| <i>circPHC3</i> | miR-1299                 | 1 |
| <i>circPHC3</i> | miR-1304-3p              | 2 |
| <i>circPHC3</i> | miR-1304-5p              | 1 |
| <i>circPHC3</i> | miR-1324                 | 1 |
| <i>circPHC3</i> | miR-133a-5p              | 1 |
| <i>circPHC3</i> | miR-136-3p               | 1 |

|                 |                     |   |
|-----------------|---------------------|---|
| <i>circPHC3</i> | miR-138-2-3p        | 3 |
| <i>circPHC3</i> | miR-138-5p          | 1 |
| <i>circPHC3</i> | miR-142-3p.2        | 1 |
| <i>circPHC3</i> | miR-142-5p          | 1 |
| <i>circPHC3</i> | miR-148a-5p         | 1 |
| <i>circPHC3</i> | miR-148b-5p/6874-3p | 6 |
| <i>circPHC3</i> | miR-149-5p          | 2 |
| <i>circPHC3</i> | miR-150-3p          | 2 |
| <i>circPHC3</i> | miR-153-3p          | 1 |
| <i>circPHC3</i> | miR-153-5p          | 3 |
| <i>circPHC3</i> | miR-1537-5p         | 1 |
| <i>circPHC3</i> | miR-154-5p          | 1 |
| <i>circPHC3</i> | miR-15b-3p          | 2 |
| <i>circPHC3</i> | miR-181-3p/4420     | 1 |
| <i>circPHC3</i> | miR-181-5p          | 2 |
| <i>circPHC3</i> | miR-182-3p          | 1 |
| <i>circPHC3</i> | miR-183-3p          | 2 |
| <i>circPHC3</i> | miR-183-5p.1        | 1 |
| <i>circPHC3</i> | miR-183-5p.2        | 1 |
| <i>circPHC3</i> | miR-186-3p          | 3 |
| <i>circPHC3</i> | miR-186-5p          | 1 |
| <i>circPHC3</i> | miR-188-3p          | 1 |
| <i>circPHC3</i> | miR-18b-3p          | 1 |
| <i>circPHC3</i> | miR-190-5p          | 1 |
| <i>circPHC3</i> | miR-1909-5p         | 1 |
| <i>circPHC3</i> | miR-1911-5p         | 3 |
| <i>circPHC3</i> | miR-192-5p/215-5p   | 1 |
| <i>circPHC3</i> | miR-193b-5p         | 1 |
| <i>circPHC3</i> | miR-1976            | 1 |
| <i>circPHC3</i> | miR-203b-3p         | 1 |
| <i>circPHC3</i> | miR-204-3p/4646-5p  | 2 |
| <i>circPHC3</i> | miR-204-5p/211-5p   | 1 |
| <i>circPHC3</i> | miR-211-3p          | 1 |
| <i>circPHC3</i> | miR-2114-3p         | 1 |
| <i>circPHC3</i> | miR-2116-5p         | 1 |
| <i>circPHC3</i> | miR-215-3p          | 4 |
| <i>circPHC3</i> | miR-217             | 1 |
| <i>circPHC3</i> | miR-218-1-3p        | 1 |

|                 |                     |   |
|-----------------|---------------------|---|
| <i>circPHC3</i> | miR-218-2-3p        | 1 |
| <i>circPHC3</i> | miR-22-5p           | 1 |
| <i>circPHC3</i> | miR-221-5p/8073     | 2 |
| <i>circPHC3</i> | miR-223-5p          | 7 |
| <i>circPHC3</i> | miR-2276-3p         | 2 |
| <i>circPHC3</i> | miR-2355-3p         | 3 |
| <i>circPHC3</i> | miR-2392            | 1 |
| <i>circPHC3</i> | miR-24-3p           | 1 |
| <i>circPHC3</i> | miR-26-5p           | 3 |
| <i>circPHC3</i> | miR-27b-5p          | 1 |
| <i>circPHC3</i> | miR-2909            | 1 |
| <i>circPHC3</i> | miR-29a-5p          | 2 |
| <i>circPHC3</i> | miR-3074-3p         | 1 |
| <i>circPHC3</i> | miR-31-5p           | 2 |
| <i>circPHC3</i> | miR-3121-3p         | 2 |
| <i>circPHC3</i> | miR-3126-3p         | 1 |
| <i>circPHC3</i> | miR-3129-3p/5583-5p | 1 |
| <i>circPHC3</i> | miR-3130-5p/4482-5p | 2 |
| <i>circPHC3</i> | miR-3133            | 1 |
| <i>circPHC3</i> | miR-3138            | 1 |
| <i>circPHC3</i> | miR-3147            | 4 |
| <i>circPHC3</i> | miR-3149            | 2 |
| <i>circPHC3</i> | miR-3152-5p         | 1 |
| <i>circPHC3</i> | miR-3156-3p         | 1 |
| <i>circPHC3</i> | miR-3158-3p         | 1 |
| <i>circPHC3</i> | miR-3159            | 1 |
| <i>circPHC3</i> | miR-3162-3p         | 3 |
| <i>circPHC3</i> | miR-3162-5p         | 4 |
| <i>circPHC3</i> | miR-3165            | 1 |
| <i>circPHC3</i> | miR-3168            | 6 |
| <i>circPHC3</i> | miR-3169            | 1 |
| <i>circPHC3</i> | miR-3177-5p         | 1 |
| <i>circPHC3</i> | miR-3184-3p         | 1 |
| <i>circPHC3</i> | miR-3191-5p         | 2 |
| <i>circPHC3</i> | miR-3192-5p         | 2 |
| <i>circPHC3</i> | miR-3198/4309       | 1 |
| <i>circPHC3</i> | miR-32-3p           | 4 |
| <i>circPHC3</i> | miR-3200-3p         | 1 |

|                 |                           |   |
|-----------------|---------------------------|---|
| <i>circPHC3</i> | miR-331-5p                | 1 |
| <i>circPHC3</i> | miR-335-3p                | 4 |
| <i>circPHC3</i> | miR-335-5p                | 2 |
| <i>circPHC3</i> | miR-338-5p                | 1 |
| <i>circPHC3</i> | miR-33a-3p                | 3 |
| <i>circPHC3</i> | miR-34-5p/449-5p          | 3 |
| <i>circPHC3</i> | miR-340-5p                | 1 |
| <i>circPHC3</i> | miR-3591-5p               | 1 |
| <i>circPHC3</i> | miR-3605-5p               | 1 |
| <i>circPHC3</i> | miR-3613-3p               | 4 |
| <i>circPHC3</i> | miR-3616-3p               | 1 |
| <i>circPHC3</i> | miR-3620-3p               | 2 |
| <i>circPHC3</i> | miR-3646                  | 1 |
| <i>circPHC3</i> | miR-3652/4430             | 1 |
| <i>circPHC3</i> | miR-3653-3p               | 3 |
| <i>circPHC3</i> | miR-3653-5p               | 1 |
| <i>circPHC3</i> | miR-3654                  | 1 |
| <i>circPHC3</i> | miR-3658                  | 1 |
| <i>circPHC3</i> | miR-3662                  | 1 |
| <i>circPHC3</i> | miR-3663-5p               | 1 |
| <i>circPHC3</i> | miR-3664-5p               | 1 |
| <i>circPHC3</i> | miR-3670                  | 1 |
| <i>circPHC3</i> | miR-3671                  | 6 |
| <i>circPHC3</i> | miR-3675-3p               | 1 |
| <i>circPHC3</i> | miR-3677-5p               | 1 |
| <i>circPHC3</i> | miR-3682-3p               | 1 |
| <i>circPHC3</i> | miR-3687/4442             | 2 |
| <i>circPHC3</i> | miR-3690                  | 2 |
| <i>circPHC3</i> | miR-3691-5p               | 1 |
| <i>circPHC3</i> | miR-371-5p                | 5 |
| <i>circPHC3</i> | miR-3714                  | 1 |
| <i>circPHC3</i> | miR-371b-5p/373-5p/616-5p | 5 |
| <i>circPHC3</i> | miR-372-5p                | 5 |
| <i>circPHC3</i> | miR-374b-3p               | 1 |
| <i>circPHC3</i> | miR-376a-2-5p             | 2 |
| <i>circPHC3</i> | miR-376a-5p               | 2 |
| <i>circPHC3</i> | miR-378a-5p               | 1 |
| <i>circPHC3</i> | miR-378j/6839-5p          | 1 |

|                 |                  |   |
|-----------------|------------------|---|
| <i>circPHC3</i> | miR-380-5p/563   | 3 |
| <i>circPHC3</i> | miR-382-3p       | 4 |
| <i>circPHC3</i> | miR-382-5p       | 4 |
| <i>circPHC3</i> | miR-383-5p.2     | 2 |
| <i>circPHC3</i> | miR-3910         | 1 |
| <i>circPHC3</i> | miR-3912-5p      | 1 |
| <i>circPHC3</i> | miR-3915         | 1 |
| <i>circPHC3</i> | miR-3920         | 1 |
| <i>circPHC3</i> | miR-3922-5p      | 1 |
| <i>circPHC3</i> | miR-3923         | 3 |
| <i>circPHC3</i> | miR-3924         | 1 |
| <i>circPHC3</i> | miR-3978         | 1 |
| <i>circPHC3</i> | miR-411-5p.1     | 1 |
| <i>circPHC3</i> | miR-411-5p.2     | 1 |
| <i>circPHC3</i> | miR-4254         | 2 |
| <i>circPHC3</i> | miR-4255         | 1 |
| <i>circPHC3</i> | miR-4258         | 1 |
| <i>circPHC3</i> | miR-4259         | 4 |
| <i>circPHC3</i> | miR-4263         | 5 |
| <i>circPHC3</i> | miR-4264         | 3 |
| <i>circPHC3</i> | miR-4280         | 1 |
| <i>circPHC3</i> | miR-4282         | 4 |
| <i>circPHC3</i> | miR-4284         | 1 |
| <i>circPHC3</i> | miR-4303         | 1 |
| <i>circPHC3</i> | miR-4305         | 1 |
| <i>circPHC3</i> | miR-4317         | 1 |
| <i>circPHC3</i> | miR-4318         | 1 |
| <i>circPHC3</i> | miR-432-3p       | 1 |
| <i>circPHC3</i> | miR-432-5p       | 1 |
| <i>circPHC3</i> | miR-4328         | 3 |
| <i>circPHC3</i> | miR-433-3p       | 1 |
| <i>circPHC3</i> | miR-4421/5699-3p | 1 |
| <i>circPHC3</i> | miR-4425         | 4 |
| <i>circPHC3</i> | miR-4427         | 3 |
| <i>circPHC3</i> | miR-4437         | 1 |
| <i>circPHC3</i> | miR-4443         | 1 |
| <i>circPHC3</i> | miR-4446-3p      | 1 |
| <i>circPHC3</i> | miR-4452         | 2 |

|                 |                    |   |
|-----------------|--------------------|---|
| <i>circPHC3</i> | miR-4454           | 1 |
| <i>circPHC3</i> | miR-4455           | 5 |
| <i>circPHC3</i> | miR-4461           | 1 |
| <i>circPHC3</i> | miR-4474-5p        | 1 |
| <i>circPHC3</i> | miR-448            | 1 |
| <i>circPHC3</i> | miR-4480           | 2 |
| <i>circPHC3</i> | miR-4482-3p        | 2 |
| <i>circPHC3</i> | miR-4496           | 1 |
| <i>circPHC3</i> | miR-4502           | 1 |
| <i>circPHC3</i> | miR-4505/5787      | 1 |
| <i>circPHC3</i> | miR-450b-3p/769-3p | 2 |
| <i>circPHC3</i> | miR-4511           | 1 |
| <i>circPHC3</i> | miR-4513/6855-3p   | 1 |
| <i>circPHC3</i> | miR-4515           | 1 |
| <i>circPHC3</i> | miR-4524-5p        | 1 |
| <i>circPHC3</i> | miR-4532           | 1 |
| <i>circPHC3</i> | miR-4540           | 1 |
| <i>circPHC3</i> | miR-4639-3p        | 1 |
| <i>circPHC3</i> | miR-4646-3p        | 3 |
| <i>circPHC3</i> | miR-4649-3p        | 1 |
| <i>circPHC3</i> | miR-4653-3p        | 1 |
| <i>circPHC3</i> | miR-4662a-3p       | 1 |
| <i>circPHC3</i> | miR-4664-3p        | 1 |
| <i>circPHC3</i> | miR-4666a-5p       | 1 |
| <i>circPHC3</i> | miR-4666b          | 1 |
| <i>circPHC3</i> | miR-4668-3p        | 3 |
| <i>circPHC3</i> | miR-4670-3p        | 5 |
| <i>circPHC3</i> | miR-4678           | 2 |
| <i>circPHC3</i> | miR-4680-3p        | 3 |
| <i>circPHC3</i> | miR-4680-5p        | 1 |
| <i>circPHC3</i> | miR-4689/6858-5p   | 1 |
| <i>circPHC3</i> | miR-4694-3p        | 1 |
| <i>circPHC3</i> | miR-4694-5p        | 1 |
| <i>circPHC3</i> | miR-4695-3p        | 2 |
| <i>circPHC3</i> | miR-4696           | 1 |
| <i>circPHC3</i> | miR-4698           | 1 |
| <i>circPHC3</i> | miR-4699-3p        | 2 |
| <i>circPHC3</i> | miR-4703-3p        | 1 |



|                 |                     |   |
|-----------------|---------------------|---|
| <i>circPHC3</i> | miR-4707-3p         | 1 |
| <i>circPHC3</i> | miR-4708-3p         | 1 |
| <i>circPHC3</i> | miR-4713-5p         | 2 |
| <i>circPHC3</i> | miR-4714-3p         | 4 |
| <i>circPHC3</i> | miR-4714-5p         | 1 |
| <i>circPHC3</i> | miR-4715-5p         | 4 |
| <i>circPHC3</i> | miR-4718            | 1 |
| <i>circPHC3</i> | miR-4721            | 1 |
| <i>circPHC3</i> | miR-4722-3p/6727-3p | 1 |
| <i>circPHC3</i> | miR-4724-3p         | 1 |
| <i>circPHC3</i> | miR-4724-5p         | 3 |
| <i>circPHC3</i> | miR-4728-3p         | 1 |
| <i>circPHC3</i> | miR-4729            | 3 |
| <i>circPHC3</i> | miR-4731-5p         | 2 |
| <i>circPHC3</i> | miR-4732-5p         | 1 |
| <i>circPHC3</i> | miR-4735-5p         | 3 |
| <i>circPHC3</i> | miR-4738-5p         | 3 |
| <i>circPHC3</i> | miR-4739            | 3 |
| <i>circPHC3</i> | miR-4740-5p         | 1 |
| <i>circPHC3</i> | miR-4747-3p         | 1 |
| <i>circPHC3</i> | miR-4750-3p         | 1 |
| <i>circPHC3</i> | miR-4757-3p         | 1 |
| <i>circPHC3</i> | miR-4759            | 1 |
| <i>circPHC3</i> | miR-4760-5p/8061    | 3 |
| <i>circPHC3</i> | miR-4761-5p         | 1 |
| <i>circPHC3</i> | miR-4762-5p         | 1 |
| <i>circPHC3</i> | miR-4764-3p         | 1 |
| <i>circPHC3</i> | miR-4765            | 1 |
| <i>circPHC3</i> | miR-4767            | 1 |
| <i>circPHC3</i> | miR-4772-3p         | 2 |
| <i>circPHC3</i> | miR-4774-3p         | 1 |
| <i>circPHC3</i> | miR-4778-3p         | 3 |
| <i>circPHC3</i> | miR-4782-5p/5706    | 1 |
| <i>circPHC3</i> | miR-4790-3p         | 4 |
| <i>circPHC3</i> | miR-4795-3p         | 4 |
| <i>circPHC3</i> | miR-4796-3p         | 1 |
| <i>circPHC3</i> | miR-4797-3p         | 3 |
| <i>circPHC3</i> | miR-4799-5p         | 5 |

|                 |                          |   |
|-----------------|--------------------------|---|
| <i>circPHC3</i> | miR-4800-5p              | 1 |
| <i>circPHC3</i> | miR-4802-5p              | 1 |
| <i>circPHC3</i> | miR-483-3p.1             | 1 |
| <i>circPHC3</i> | miR-483-5p               | 1 |
| <i>circPHC3</i> | miR-487a-5p/487b-5p      | 1 |
| <i>circPHC3</i> | miR-488-5p               | 1 |
| <i>circPHC3</i> | miR-489-3p               | 2 |
| <i>circPHC3</i> | miR-495-5p               | 4 |
| <i>circPHC3</i> | miR-496.1                | 1 |
| <i>circPHC3</i> | miR-496.2                | 7 |
| <i>circPHC3</i> | miR-498                  | 1 |
| <i>circPHC3</i> | miR-4999-5p              | 1 |
| <i>circPHC3</i> | miR-5002-5p              | 5 |
| <i>circPHC3</i> | miR-5003-3p              | 1 |
| <i>circPHC3</i> | miR-5009-5p/8058         | 1 |
| <i>circPHC3</i> | miR-5011-3p              | 1 |
| <i>circPHC3</i> | miR-5011-5p              | 5 |
| <i>circPHC3</i> | miR-505-3p.1             | 1 |
| <i>circPHC3</i> | miR-5088-5p              | 1 |
| <i>circPHC3</i> | miR-5089-5p              | 2 |
| <i>circPHC3</i> | miR-509-3-5p/509-5p/4418 | 1 |
| <i>circPHC3</i> | miR-5093                 | 1 |
| <i>circPHC3</i> | miR-5095/7151-3p         | 1 |
| <i>circPHC3</i> | miR-5096                 | 2 |
| <i>circPHC3</i> | miR-510-3p               | 2 |
| <i>circPHC3</i> | miR-511-5p               | 1 |
| <i>circPHC3</i> | miR-512-5p               | 4 |
| <i>circPHC3</i> | miR-513c-5p/514b-5p      | 2 |
| <i>circPHC3</i> | miR-514a-3p              | 4 |
| <i>circPHC3</i> | miR-514a-5p              | 1 |
| <i>circPHC3</i> | miR-516b-5p              | 1 |
| <i>circPHC3</i> | miR-5186                 | 1 |
| <i>circPHC3</i> | miR-5187-3p              | 3 |
| <i>circPHC3</i> | miR-5189-3p              | 2 |
| <i>circPHC3</i> | miR-518a-5p/527          | 1 |
| <i>circPHC3</i> | miR-520g-5p              | 1 |
| <i>circPHC3</i> | miR-522-3p               | 1 |
| <i>circPHC3</i> | miR-526b-5p              | 1 |

|                 |                                                                    |   |
|-----------------|--------------------------------------------------------------------|---|
| <i>circPHC3</i> | miR-539-3p                                                         | 2 |
| <i>circPHC3</i> | miR-539-5p                                                         | 1 |
| <i>circPHC3</i> | miR-544a                                                           | 1 |
| <i>circPHC3</i> | miR-548al/4445-3p                                                  | 2 |
| <i>circPHC3</i> | miR-548ap-3p/548aa/548t-3p                                         | 1 |
| <i>circPHC3</i> | miR-548as-3p                                                       | 1 |
| <i>circPHC3</i> | miR-548au-3p                                                       | 3 |
| <i>circPHC3</i> | miR-548av-5p/548k/8054                                             | 3 |
| <i>circPHC3</i> | miR-548aw                                                          | 1 |
| <i>circPHC3</i> | miR-548ay-3p/548at-3p                                              | 1 |
| <i>circPHC3</i> | miR-548ay-5p/548au-5p/548as-5p/548ar-3p/548aq-5p/548ap-5p/548am-3p | 3 |
| <i>circPHC3</i> | miR-548az-3p/548ar-3p/548a-3p/548e-3p/548f-3p                      | 1 |
| <i>circPHC3</i> | miR-548b-3p                                                        | 1 |
| <i>circPHC3</i> | miR-548c-3p                                                        | 1 |
| <i>circPHC3</i> | miR-548g-3p                                                        | 4 |
| <i>circPHC3</i> | miR-548l                                                           | 3 |
| <i>circPHC3</i> | miR-548m                                                           | 1 |
| <i>circPHC3</i> | miR-550a-3-5p/550a-5p/1271-3p                                      | 1 |
| <i>circPHC3</i> | miR-551b-5p                                                        | 3 |
| <i>circPHC3</i> | miR-552-3p                                                         | 1 |
| <i>circPHC3</i> | miR-554                                                            | 3 |
| <i>circPHC3</i> | miR-556-5p                                                         | 1 |
| <i>circPHC3</i> | miR-5571-3p                                                        | 1 |
| <i>circPHC3</i> | miR-5579-5p                                                        | 1 |
| <i>circPHC3</i> | miR-5582-3p                                                        | 1 |
| <i>circPHC3</i> | miR-5584-3p                                                        | 6 |
| <i>circPHC3</i> | miR-5585-3p                                                        | 5 |
| <i>circPHC3</i> | miR-5586-3p                                                        | 2 |
| <i>circPHC3</i> | miR-5589-5p                                                        | 2 |
| <i>circPHC3</i> | miR-5591-3p                                                        | 4 |
| <i>circPHC3</i> | miR-561-5p                                                         | 1 |
| <i>circPHC3</i> | miR-564                                                            | 1 |
| <i>circPHC3</i> | miR-5681a                                                          | 2 |
| <i>circPHC3</i> | miR-5681b                                                          | 1 |
| <i>circPHC3</i> | miR-5682                                                           | 2 |
| <i>circPHC3</i> | miR-5684                                                           | 1 |
| <i>circPHC3</i> | miR-569                                                            | 6 |
| <i>circPHC3</i> | miR-5692a                                                          | 2 |

|                 |                    |   |
|-----------------|--------------------|---|
| <i>circPHC3</i> | miR-5694           | 2 |
| <i>circPHC3</i> | miR-5696           | 3 |
| <i>circPHC3</i> | miR-5697           | 3 |
| <i>circPHC3</i> | miR-570-3p         | 1 |
| <i>circPHC3</i> | miR-573/3616-5p    | 2 |
| <i>circPHC3</i> | miR-576-5p         | 5 |
| <i>circPHC3</i> | miR-578            | 3 |
| <i>circPHC3</i> | miR-579-3p         | 3 |
| <i>circPHC3</i> | miR-580-3p         | 1 |
| <i>circPHC3</i> | miR-582-5p         | 2 |
| <i>circPHC3</i> | miR-585-3p         | 1 |
| <i>circPHC3</i> | miR-585-5p         | 2 |
| <i>circPHC3</i> | miR-604            | 1 |
| <i>circPHC3</i> | miR-6069           | 1 |
| <i>circPHC3</i> | miR-6071           | 1 |
| <i>circPHC3</i> | miR-609            | 5 |
| <i>circPHC3</i> | miR-6128           | 3 |
| <i>circPHC3</i> | miR-6131           | 1 |
| <i>circPHC3</i> | miR-6134           | 1 |
| <i>circPHC3</i> | miR-615-3p         | 1 |
| <i>circPHC3</i> | miR-616-3p         | 3 |
| <i>circPHC3</i> | miR-618            | 1 |
| <i>circPHC3</i> | miR-619-3p         | 1 |
| <i>circPHC3</i> | miR-619-5p/6506-5p | 2 |
| <i>circPHC3</i> | miR-623            | 1 |
| <i>circPHC3</i> | miR-626/6876-3p    | 2 |
| <i>circPHC3</i> | miR-627-3p         | 1 |
| <i>circPHC3</i> | miR-629-5p         | 1 |
| <i>circPHC3</i> | miR-630            | 2 |
| <i>circPHC3</i> | miR-632/4288       | 1 |
| <i>circPHC3</i> | miR-642b-5p        | 3 |
| <i>circPHC3</i> | miR-647            | 2 |
| <i>circPHC3</i> | miR-6499-3p        | 1 |
| <i>circPHC3</i> | miR-6499-5p        | 1 |
| <i>circPHC3</i> | miR-6508-5p/8067   | 1 |
| <i>circPHC3</i> | miR-6509-5p        | 3 |
| <i>circPHC3</i> | miR-651-3p         | 1 |
| <i>circPHC3</i> | miR-6511-3p        | 1 |

|                 |                     |   |
|-----------------|---------------------|---|
| <i>circPHC3</i> | miR-6512-5p         | 2 |
| <i>circPHC3</i> | miR-6514-3p         | 1 |
| <i>circPHC3</i> | miR-6514-5p         | 1 |
| <i>circPHC3</i> | miR-6515-5p         | 1 |
| <i>circPHC3</i> | miR-653-3p          | 1 |
| <i>circPHC3</i> | miR-654-3p          | 1 |
| <i>circPHC3</i> | miR-656-5p          | 1 |
| <i>circPHC3</i> | miR-659-3p          | 5 |
| <i>circPHC3</i> | miR-661             | 3 |
| <i>circPHC3</i> | miR-664a-5p/4794    | 2 |
| <i>circPHC3</i> | miR-668-3p          | 1 |
| <i>circPHC3</i> | miR-6715b-3p        | 5 |
| <i>circPHC3</i> | miR-6723-5p         | 1 |
| <i>circPHC3</i> | miR-6728-3p         | 2 |
| <i>circPHC3</i> | miR-6728-5p         | 2 |
| <i>circPHC3</i> | miR-6730-5p         | 2 |
| <i>circPHC3</i> | miR-6732-3p         | 1 |
| <i>circPHC3</i> | miR-6735-3p         | 1 |
| <i>circPHC3</i> | miR-6738-3p         | 1 |
| <i>circPHC3</i> | miR-6740-3p         | 1 |
| <i>circPHC3</i> | miR-6741-5p         | 4 |
| <i>circPHC3</i> | miR-6747-3p         | 1 |
| <i>circPHC3</i> | miR-6748-3p         | 1 |
| <i>circPHC3</i> | miR-6755-3p         | 1 |
| <i>circPHC3</i> | miR-6758-5p/6856-5p | 2 |
| <i>circPHC3</i> | miR-6759-3p         | 1 |
| <i>circPHC3</i> | miR-6760-5p         | 3 |
| <i>circPHC3</i> | miR-6762-3p         | 1 |
| <i>circPHC3</i> | miR-6772-5p         | 5 |
| <i>circPHC3</i> | miR-6773-3p         | 4 |
| <i>circPHC3</i> | miR-6778-3p         | 2 |
| <i>circPHC3</i> | miR-6782-3p         | 2 |
| <i>circPHC3</i> | miR-6784-3p/6862-3p | 1 |
| <i>circPHC3</i> | miR-6787-3p         | 1 |
| <i>circPHC3</i> | miR-6791-3p/6829-3p | 2 |
| <i>circPHC3</i> | miR-6794-3p         | 1 |
| <i>circPHC3</i> | miR-6796-3p         | 2 |
| <i>circPHC3</i> | miR-6800-3p         | 4 |

|                 |                     |   |
|-----------------|---------------------|---|
| <i>circPHC3</i> | miR-6802-3p         | 3 |
| <i>circPHC3</i> | miR-6809-5p         | 2 |
| <i>circPHC3</i> | miR-6813-3p         | 1 |
| <i>circPHC3</i> | miR-6814-5p         | 3 |
| <i>circPHC3</i> | miR-6815-3p         | 3 |
| <i>circPHC3</i> | miR-6816-3p         | 1 |
| <i>circPHC3</i> | miR-6817-3p         | 1 |
| <i>circPHC3</i> | miR-6820-5p         | 3 |
| <i>circPHC3</i> | miR-6823-5p         | 1 |
| <i>circPHC3</i> | miR-6828-3p         | 1 |
| <i>circPHC3</i> | miR-6832-5p         | 1 |
| <i>circPHC3</i> | miR-6836-3p         | 2 |
| <i>circPHC3</i> | miR-6842-3p         | 2 |
| <i>circPHC3</i> | miR-6843-3p/6848-3p | 1 |
| <i>circPHC3</i> | miR-6847-3p         | 1 |
| <i>circPHC3</i> | miR-6851-3p         | 1 |
| <i>circPHC3</i> | miR-6853-3p         | 1 |
| <i>circPHC3</i> | miR-6857-3p         | 1 |
| <i>circPHC3</i> | miR-6867-3p         | 2 |
| <i>circPHC3</i> | miR-6868-3p         | 2 |
| <i>circPHC3</i> | miR-6869-5p         | 1 |
| <i>circPHC3</i> | miR-6870-3p         | 1 |
| <i>circPHC3</i> | miR-6879-3p         | 3 |
| <i>circPHC3</i> | miR-6880-5p         | 1 |
| <i>circPHC3</i> | miR-6883-3p         | 1 |
| <i>circPHC3</i> | miR-6894-3p         | 1 |
| <i>circPHC3</i> | miR-7-3p            | 1 |
| <i>circPHC3</i> | miR-7108-3p         | 1 |
| <i>circPHC3</i> | miR-7109-3p         | 2 |
| <i>circPHC3</i> | miR-7110-3p         | 1 |
| <i>circPHC3</i> | miR-7152-3p         | 1 |
| <i>circPHC3</i> | miR-7154-5p         | 1 |
| <i>circPHC3</i> | miR-7158-3p         | 1 |
| <i>circPHC3</i> | miR-7158-5p         | 4 |
| <i>circPHC3</i> | miR-7159-3p         | 2 |
| <i>circPHC3</i> | miR-7162-3p         | 1 |
| <i>circPHC3</i> | miR-758-5p          | 3 |
| <i>circPHC3</i> | miR-7641            | 1 |

|                 |              |   |
|-----------------|--------------|---|
| <i>circPHC3</i> | miR-767-3p   | 1 |
| <i>circPHC3</i> | miR-767-5p   | 2 |
| <i>circPHC3</i> | miR-770-5p   | 2 |
| <i>circPHC3</i> | miR-7844-5p  | 1 |
| <i>circPHC3</i> | miR-7848-3p  | 3 |
| <i>circPHC3</i> | miR-7849-3p  | 4 |
| <i>circPHC3</i> | miR-7851-3p  | 1 |
| <i>circPHC3</i> | miR-7854-3p  | 1 |
| <i>circPHC3</i> | miR-7855-5p  | 1 |
| <i>circPHC3</i> | miR-7856-5p  | 3 |
| <i>circPHC3</i> | miR-7973     | 3 |
| <i>circPHC3</i> | miR-7975     | 1 |
| <i>circPHC3</i> | miR-8055     | 3 |
| <i>circPHC3</i> | miR-8056     | 1 |
| <i>circPHC3</i> | miR-8060     | 2 |
| <i>circPHC3</i> | miR-8062     | 2 |
| <i>circPHC3</i> | miR-8063     | 1 |
| <i>circPHC3</i> | miR-8069     | 1 |
| <i>circPHC3</i> | miR-8071     | 1 |
| <i>circPHC3</i> | miR-8080     | 1 |
| <i>circPHC3</i> | miR-8081     | 1 |
| <i>circPHC3</i> | miR-8083     | 1 |
| <i>circPHC3</i> | miR-873-5p.1 | 1 |
| <i>circPHC3</i> | miR-875-3p   | 1 |
| <i>circPHC3</i> | miR-876-5p   | 1 |
| <i>circPHC3</i> | miR-889-3p   | 5 |
| <i>circPHC3</i> | miR-892a     | 1 |
| <i>circPHC3</i> | miR-941      | 2 |
| <i>circPHC3</i> | miR-95-5p    | 1 |
| <i>circPHC3</i> | miR-99-3p    | 2 |
| <i>circPHIP</i> | miR-1179     | 1 |
| <i>circPHIP</i> | miR-1184     | 1 |
| <i>circPHIP</i> | miR-1205     | 1 |
| <i>circPHIP</i> | miR-1208     | 1 |
| <i>circPHIP</i> | miR-1224-3p  | 1 |
| <i>circPHIP</i> | miR-1226-3p  | 1 |
| <i>circPHIP</i> | miR-1236-3p  | 1 |
| <i>circPHIP</i> | miR-1238-3p  | 1 |

|                 |                                     |   |
|-----------------|-------------------------------------|---|
| <i>circPHIP</i> | miR-1287-5p                         | 1 |
| <i>circPHIP</i> | miR-1295b-5p/1912                   | 1 |
| <i>circPHIP</i> | miR-1305                            | 1 |
| <i>circPHIP</i> | miR-1306-5p                         | 1 |
| <i>circPHIP</i> | miR-1324                            | 1 |
| <i>circPHIP</i> | miR-1343-3p                         | 1 |
| <i>circPHIP</i> | miR-136-3p                          | 1 |
| <i>circPHIP</i> | miR-143-5p                          | 1 |
| <i>circPHIP</i> | miR-145-3p                          | 1 |
| <i>circPHIP</i> | miR-147a                            | 1 |
| <i>circPHIP</i> | miR-149-5p                          | 1 |
| <i>circPHIP</i> | miR-153-3p                          | 1 |
| <i>circPHIP</i> | miR-17-3p                           | 1 |
| <i>circPHIP</i> | miR-17-5p/20-5p/93-5p/106-5p/519-3p | 1 |
| <i>circPHIP</i> | miR-181c-3p                         | 1 |
| <i>circPHIP</i> | miR-185-3p                          | 1 |
| <i>circPHIP</i> | miR-1911-5p                         | 1 |
| <i>circPHIP</i> | miR-193-3p                          | 1 |
| <i>circPHIP</i> | miR-197-3p                          | 1 |
| <i>circPHIP</i> | miR-216b-3p                         | 1 |
| <i>circPHIP</i> | miR-217                             | 1 |
| <i>circPHIP</i> | miR-2276-3p                         | 2 |
| <i>circPHIP</i> | miR-28-5p/708-5p                    | 1 |
| <i>circPHIP</i> | miR-29-3p                           | 1 |
| <i>circPHIP</i> | miR-3065-3p                         | 1 |
| <i>circPHIP</i> | miR-3074-5p                         | 1 |
| <i>circPHIP</i> | miR-3117-3p                         | 1 |
| <i>circPHIP</i> | miR-3117-5p                         | 2 |
| <i>circPHIP</i> | miR-3128                            | 1 |
| <i>circPHIP</i> | miR-3130-5p/4482-5p                 | 1 |
| <i>circPHIP</i> | miR-3135b                           | 1 |
| <i>circPHIP</i> | miR-3145-3p                         | 1 |
| <i>circPHIP</i> | miR-3151-3p                         | 1 |
| <i>circPHIP</i> | miR-3153/6733-5p/6739-5p            | 1 |
| <i>circPHIP</i> | miR-3158-5p                         | 1 |
| <i>circPHIP</i> | miR-3160-3p                         | 1 |
| <i>circPHIP</i> | miR-3166                            | 1 |
| <i>circPHIP</i> | miR-3177-5p                         | 1 |



|                 |                           |   |
|-----------------|---------------------------|---|
| <i>circPHIP</i> | miR-3190-3p               | 2 |
| <i>circPHIP</i> | miR-3194-3p               | 1 |
| <i>circPHIP</i> | miR-3198/4309             | 1 |
| <i>circPHIP</i> | miR-3201/4791             | 1 |
| <i>circPHIP</i> | miR-320e                  | 1 |
| <i>circPHIP</i> | miR-326                   | 1 |
| <i>circPHIP</i> | miR-335-3p                | 1 |
| <i>circPHIP</i> | miR-338-3p                | 1 |
| <i>circPHIP</i> | miR-34a-3p                | 1 |
| <i>circPHIP</i> | miR-34b-3p                | 1 |
| <i>circPHIP</i> | miR-34c-3p                | 1 |
| <i>circPHIP</i> | miR-361-5p                | 1 |
| <i>circPHIP</i> | miR-3614-5p               | 2 |
| <i>circPHIP</i> | miR-3617-3p               | 1 |
| <i>circPHIP</i> | miR-3622a-3p/3622b-3p     | 2 |
| <i>circPHIP</i> | miR-3655                  | 1 |
| <i>circPHIP</i> | miR-3662                  | 1 |
| <i>circPHIP</i> | miR-3664-5p               | 1 |
| <i>circPHIP</i> | miR-3667-5p               | 1 |
| <i>circPHIP</i> | miR-3690                  | 1 |
| <i>circPHIP</i> | miR-371-5p                | 1 |
| <i>circPHIP</i> | miR-371b-5p/373-5p/616-5p | 1 |
| <i>circPHIP</i> | miR-372-5p                | 1 |
| <i>circPHIP</i> | miR-374b-3p               | 1 |
| <i>circPHIP</i> | miR-374c-3p               | 1 |
| <i>circPHIP</i> | miR-383-3p                | 1 |
| <i>circPHIP</i> | miR-3911                  | 1 |
| <i>circPHIP</i> | miR-3928-5p/6806-3p       | 1 |
| <i>circPHIP</i> | miR-3973                  | 1 |
| <i>circPHIP</i> | miR-3978                  | 1 |
| <i>circPHIP</i> | miR-409-3p                | 1 |
| <i>circPHIP</i> | miR-4254                  | 1 |
| <i>circPHIP</i> | miR-4255                  | 1 |
| <i>circPHIP</i> | miR-4266                  | 1 |
| <i>circPHIP</i> | miR-4280                  | 1 |
| <i>circPHIP</i> | miR-4291                  | 1 |
| <i>circPHIP</i> | miR-4302                  | 1 |
| <i>circPHIP</i> | miR-4310/7157-5p          | 1 |

|                 |                             |   |
|-----------------|-----------------------------|---|
| <i>circPHIP</i> | miR-4318                    | 2 |
| <i>circPHIP</i> | miR-432-5p                  | 1 |
| <i>circPHIP</i> | miR-4324                    | 1 |
| <i>circPHIP</i> | miR-4325                    | 1 |
| <i>circPHIP</i> | miR-4326                    | 1 |
| <i>circPHIP</i> | miR-4427                    | 1 |
| <i>circPHIP</i> | miR-4476/6876-5p            | 1 |
| <i>circPHIP</i> | miR-448                     | 1 |
| <i>circPHIP</i> | miR-4487                    | 1 |
| <i>circPHIP</i> | miR-4494                    | 1 |
| <i>circPHIP</i> | miR-4506                    | 1 |
| <i>circPHIP</i> | miR-4517                    | 1 |
| <i>circPHIP</i> | miR-452-3p                  | 1 |
| <i>circPHIP</i> | miR-4520-2-3p               | 1 |
| <i>circPHIP</i> | miR-4520-3p                 | 1 |
| <i>circPHIP</i> | miR-4520-5p                 | 1 |
| <i>circPHIP</i> | miR-4524b-3p                | 1 |
| <i>circPHIP</i> | miR-4529-3p                 | 1 |
| <i>circPHIP</i> | miR-4530                    | 1 |
| <i>circPHIP</i> | miR-455-3p.2                | 1 |
| <i>circPHIP</i> | miR-4633-3p/6500-5p         | 1 |
| <i>circPHIP</i> | miR-4635                    | 1 |
| <i>circPHIP</i> | miR-4645-3p                 | 1 |
| <i>circPHIP</i> | miR-466                     | 1 |
| <i>circPHIP</i> | miR-4661-3p                 | 1 |
| <i>circPHIP</i> | miR-4668-5p                 | 1 |
| <i>circPHIP</i> | miR-4670-5p                 | 1 |
| <i>circPHIP</i> | miR-4680-3p                 | 1 |
| <i>circPHIP</i> | miR-4682                    | 1 |
| <i>circPHIP</i> | miR-4684-3p                 | 1 |
| <i>circPHIP</i> | miR-4686                    | 1 |
| <i>circPHIP</i> | miR-4693-5p                 | 1 |
| <i>circPHIP</i> | miR-4699-3p                 | 1 |
| <i>circPHIP</i> | miR-4714-5p                 | 1 |
| <i>circPHIP</i> | miR-4717-3p                 | 1 |
| <i>circPHIP</i> | miR-4720-5p/4799-3p/5588-5p | 1 |
| <i>circPHIP</i> | miR-4733-3p                 | 1 |
| <i>circPHIP</i> | miR-4752                    | 2 |

|                 |                          |   |
|-----------------|--------------------------|---|
| <i>circPHIP</i> | miR-4771                 | 1 |
| <i>circPHIP</i> | miR-4772-3p              | 2 |
| <i>circPHIP</i> | miR-4778-3p              | 1 |
| <i>circPHIP</i> | miR-4781-3p              | 1 |
| <i>circPHIP</i> | miR-4790-3p              | 1 |
| <i>circPHIP</i> | miR-483-5p               | 1 |
| <i>circPHIP</i> | miR-492                  | 1 |
| <i>circPHIP</i> | miR-496.2                | 1 |
| <i>circPHIP</i> | miR-498                  | 1 |
| <i>circPHIP</i> | miR-499b-5p              | 1 |
| <i>circPHIP</i> | miR-5003-3p              | 1 |
| <i>circPHIP</i> | miR-500b-3p              | 1 |
| <i>circPHIP</i> | miR-509-3-5p/509-5p/4418 | 1 |
| <i>circPHIP</i> | miR-5093                 | 1 |
| <i>circPHIP</i> | miR-514a-5p              | 1 |
| <i>circPHIP</i> | miR-5187-3p              | 1 |
| <i>circPHIP</i> | miR-518a-5p/527          | 1 |
| <i>circPHIP</i> | miR-518c-5p              | 1 |
| <i>circPHIP</i> | miR-520g-3p              | 1 |
| <i>circPHIP</i> | miR-524-5p               | 1 |
| <i>circPHIP</i> | miR-526b-5p              | 1 |
| <i>circPHIP</i> | miR-544b                 | 1 |
| <i>circPHIP</i> | miR-548ah-5p/3609        | 1 |
| <i>circPHIP</i> | miR-548ao-3p             | 1 |
| <i>circPHIP</i> | miR-548ao-5p/548ax       | 1 |
| <i>circPHIP</i> | miR-548aw                | 1 |
| <i>circPHIP</i> | miR-556-3p               | 1 |
| <i>circPHIP</i> | miR-5571-5p              | 1 |
| <i>circPHIP</i> | miR-5579-5p              | 1 |
| <i>circPHIP</i> | miR-558                  | 1 |
| <i>circPHIP</i> | miR-5583-3p              | 1 |
| <i>circPHIP</i> | miR-5585-5p              | 1 |
| <i>circPHIP</i> | miR-5589-3p              | 1 |
| <i>circPHIP</i> | miR-561-5p               | 1 |
| <i>circPHIP</i> | miR-5680                 | 1 |
| <i>circPHIP</i> | miR-5681a                | 1 |
| <i>circPHIP</i> | miR-5682                 | 1 |
| <i>circPHIP</i> | miR-5691                 | 1 |

|                 |                  |   |
|-----------------|------------------|---|
| <i>circPHIP</i> | miR-5700         | 1 |
| <i>circPHIP</i> | miR-5702         | 1 |
| <i>circPHIP</i> | miR-5708         | 1 |
| <i>circPHIP</i> | miR-573/3616-5p  | 1 |
| <i>circPHIP</i> | miR-578          | 2 |
| <i>circPHIP</i> | miR-584-3p       | 1 |
| <i>circPHIP</i> | miR-584-5p       | 1 |
| <i>circPHIP</i> | miR-585-5p       | 1 |
| <i>circPHIP</i> | miR-586          | 1 |
| <i>circPHIP</i> | miR-592          | 1 |
| <i>circPHIP</i> | miR-595          | 1 |
| <i>circPHIP</i> | miR-599          | 1 |
| <i>circPHIP</i> | miR-604          | 1 |
| <i>circPHIP</i> | miR-6071         | 1 |
| <i>circPHIP</i> | miR-6077         | 2 |
| <i>circPHIP</i> | miR-6079         | 2 |
| <i>circPHIP</i> | miR-6128         | 1 |
| <i>circPHIP</i> | miR-622          | 1 |
| <i>circPHIP</i> | miR-627-5p       | 1 |
| <i>circPHIP</i> | miR-641/3617-5p  | 1 |
| <i>circPHIP</i> | miR-644a         | 1 |
| <i>circPHIP</i> | miR-647          | 1 |
| <i>circPHIP</i> | miR-6499-3p      | 1 |
| <i>circPHIP</i> | miR-6500-3p      | 2 |
| <i>circPHIP</i> | miR-6502-3p      | 1 |
| <i>circPHIP</i> | miR-6504-3p      | 1 |
| <i>circPHIP</i> | miR-651-3p       | 1 |
| <i>circPHIP</i> | miR-651-5p       | 1 |
| <i>circPHIP</i> | miR-6515-3p      | 1 |
| <i>circPHIP</i> | miR-659-5p       | 1 |
| <i>circPHIP</i> | miR-664a-5p/4794 | 1 |
| <i>circPHIP</i> | miR-670-3p       | 1 |
| <i>circPHIP</i> | miR-671-5p       | 1 |
| <i>circPHIP</i> | miR-6730-5p      | 1 |
| <i>circPHIP</i> | miR-6733-3p      | 1 |
| <i>circPHIP</i> | miR-6739-3p      | 1 |
| <i>circPHIP</i> | miR-6760-3p      | 1 |
| <i>circPHIP</i> | miR-6762-3p      | 1 |

|                   |                                       |   |
|-------------------|---------------------------------------|---|
| <i>circPHIP</i>   | miR-6764-3p/6824-3p                   | 1 |
| <i>circPHIP</i>   | miR-6765-3p                           | 2 |
| <i>circPHIP</i>   | miR-6790-3p                           | 1 |
| <i>circPHIP</i>   | miR-6800-3p                           | 1 |
| <i>circPHIP</i>   | miR-6804-3p                           | 1 |
| <i>circPHIP</i>   | miR-6818-5p                           | 1 |
| <i>circPHIP</i>   | miR-6821-3p                           | 1 |
| <i>circPHIP</i>   | miR-6827-5p                           | 1 |
| <i>circPHIP</i>   | miR-6828-3p                           | 1 |
| <i>circPHIP</i>   | miR-6828-5p                           | 1 |
| <i>circPHIP</i>   | miR-6830-3p                           | 1 |
| <i>circPHIP</i>   | miR-6830-5p                           | 1 |
| <i>circPHIP</i>   | miR-6833-5p                           | 2 |
| <i>circPHIP</i>   | miR-6842-3p                           | 1 |
| <i>circPHIP</i>   | miR-6861-3p                           | 1 |
| <i>circPHIP</i>   | miR-6868-5p                           | 1 |
| <i>circPHIP</i>   | miR-6871-3p                           | 1 |
| <i>circPHIP</i>   | miR-6871-5p                           | 1 |
| <i>circPHIP</i>   | miR-6879-3p                           | 1 |
| <i>circPHIP</i>   | miR-7-3p                              | 1 |
| <i>circPHIP</i>   | miR-7-5p                              | 2 |
| <i>circPHIP</i>   | miR-7114-5p                           | 1 |
| <i>circPHIP</i>   | miR-7150                              | 1 |
| <i>circPHIP</i>   | miR-7152-5p                           | 1 |
| <i>circPHIP</i>   | miR-767-3p                            | 1 |
| <i>circPHIP</i>   | miR-7703                              | 1 |
| <i>circPHIP</i>   | miR-7855-5p                           | 1 |
| <i>circPHIP</i>   | miR-8060                              | 1 |
| <i>circPHIP</i>   | miR-875-3p                            | 1 |
| <i>circPHIP</i>   | miR-892a                              | 2 |
| <i>circPHIP</i>   | miR-935                               | 1 |
| <i>circPHIP</i>   | miR-937-5p                            | 1 |
| <i>circPHIP</i>   | miR-3611                              | 1 |
| <i>circPHIP</i>   | miR-4289                              | 1 |
| <i>circPHIP</i>   | miR-758-3p                            | 1 |
| <i>circPICALM</i> | let-7a-2-3p/let-7g-3p                 | 5 |
| <i>circPICALM</i> | let-7a-3p/let-7b-3p/let-7f-1-3p/98-3p | 1 |
| <i>circPICALM</i> | let-7c-3p                             | 5 |

|                   |                          |   |
|-------------------|--------------------------|---|
| <i>circPICALM</i> | let-7f-2-3p/1185-3p      | 1 |
| <i>circPICALM</i> | miR-1-3p/206             | 2 |
| <i>circPICALM</i> | miR-10-5p                | 1 |
| <i>circPICALM</i> | miR-100-3p               | 2 |
| <i>circPICALM</i> | miR-101-3p.1             | 1 |
| <i>circPICALM</i> | miR-101-3p.2             | 1 |
| <i>circPICALM</i> | miR-101-5p               | 3 |
| <i>circPICALM</i> | miR-103-3p/107           | 7 |
| <i>circPICALM</i> | miR-103a-2-5p            | 1 |
| <i>circPICALM</i> | miR-103b                 | 1 |
| <i>circPICALM</i> | miR-105-5p               | 8 |
| <i>circPICALM</i> | miR-106a-3p              | 1 |
| <i>circPICALM</i> | miR-1178-3p              | 1 |
| <i>circPICALM</i> | miR-1179                 | 3 |
| <i>circPICALM</i> | miR-1183                 | 2 |
| <i>circPICALM</i> | miR-1184                 | 2 |
| <i>circPICALM</i> | miR-1193                 | 1 |
| <i>circPICALM</i> | miR-1197                 | 2 |
| <i>circPICALM</i> | miR-1200                 | 1 |
| <i>circPICALM</i> | miR-1205                 | 2 |
| <i>circPICALM</i> | miR-1206                 | 1 |
| <i>circPICALM</i> | miR-1207-3p              | 4 |
| <i>circPICALM</i> | miR-1208                 | 4 |
| <i>circPICALM</i> | miR-1224-3p              | 3 |
| <i>circPICALM</i> | miR-1224-5p              | 1 |
| <i>circPICALM</i> | miR-1225-3p              | 1 |
| <i>circPICALM</i> | miR-1226-3p              | 1 |
| <i>circPICALM</i> | miR-1227-5p              | 3 |
| <i>circPICALM</i> | miR-1228-3p              | 1 |
| <i>circPICALM</i> | miR-1237-3p              | 2 |
| <i>circPICALM</i> | miR-1237-5p/4488/4697-5p | 1 |
| <i>circPICALM</i> | miR-1238-3p              | 3 |
| <i>circPICALM</i> | miR-124-3p.1             | 1 |
| <i>circPICALM</i> | miR-124-3p.2/506-3p      | 1 |
| <i>circPICALM</i> | miR-124-5p               | 5 |
| <i>circPICALM</i> | miR-1243                 | 1 |
| <i>circPICALM</i> | miR-1244                 | 5 |
| <i>circPICALM</i> | miR-1245b-3p             | 3 |

|                   |                          |   |
|-------------------|--------------------------|---|
| <i>circPICALM</i> | miR-1246                 | 1 |
| <i>circPICALM</i> | miR-1248                 | 2 |
| <i>circPICALM</i> | miR-1249-5p/6797-5p      | 2 |
| <i>circPICALM</i> | miR-1250-3p              | 5 |
| <i>circPICALM</i> | miR-1251-3p              | 4 |
| <i>circPICALM</i> | miR-1252-3p              | 3 |
| <i>circPICALM</i> | miR-1252-5p              | 4 |
| <i>circPICALM</i> | miR-1255a/1255b-5p       | 5 |
| <i>circPICALM</i> | miR-1255b-2-3p           | 1 |
| <i>circPICALM</i> | miR-1257                 | 2 |
| <i>circPICALM</i> | miR-1258                 | 1 |
| <i>circPICALM</i> | miR-125a-3p              | 2 |
| <i>circPICALM</i> | miR-126-5p               | 2 |
| <i>circPICALM</i> | miR-1260a/1260b          | 4 |
| <i>circPICALM</i> | miR-1261                 | 2 |
| <i>circPICALM</i> | miR-1262/4701-3p/6736-5p | 1 |
| <i>circPICALM</i> | miR-1263                 | 1 |
| <i>circPICALM</i> | miR-1264                 | 1 |
| <i>circPICALM</i> | miR-1265                 | 3 |
| <i>circPICALM</i> | miR-1266-3p              | 7 |
| <i>circPICALM</i> | miR-1266-5p/4518         | 1 |
| <i>circPICALM</i> | miR-1267                 | 9 |
| <i>circPICALM</i> | miR-1269                 | 3 |
| <i>circPICALM</i> | miR-1272                 | 4 |
| <i>circPICALM</i> | miR-1273e                | 2 |
| <i>circPICALM</i> | miR-1273f                | 2 |
| <i>circPICALM</i> | miR-1273g-3p             | 1 |
| <i>circPICALM</i> | miR-1273h-3p             | 1 |
| <i>circPICALM</i> | miR-1275/4665-5p         | 2 |
| <i>circPICALM</i> | miR-1276                 | 1 |
| <i>circPICALM</i> | miR-1277-5p              | 2 |
| <i>circPICALM</i> | miR-1278                 | 2 |
| <i>circPICALM</i> | miR-1279                 | 1 |
| <i>circPICALM</i> | miR-128-3p               | 1 |
| <i>circPICALM</i> | miR-1282                 | 4 |
| <i>circPICALM</i> | miR-1283                 | 4 |
| <i>circPICALM</i> | miR-1284                 | 2 |
| <i>circPICALM</i> | miR-1285-5p              | 1 |

|                   |                          |   |
|-------------------|--------------------------|---|
| <i>circPICALM</i> | miR-1286                 | 3 |
| <i>circPICALM</i> | miR-1289                 | 2 |
| <i>circPICALM</i> | miR-129-5p               | 5 |
| <i>circPICALM</i> | miR-1290                 | 2 |
| <i>circPICALM</i> | miR-1291/6775-3p         | 1 |
| <i>circPICALM</i> | miR-1293/4483            | 1 |
| <i>circPICALM</i> | miR-1298-5p              | 1 |
| <i>circPICALM</i> | miR-130-3p/301-3p/454-3p | 1 |
| <i>circPICALM</i> | miR-1301-3p              | 4 |
| <i>circPICALM</i> | miR-1303                 | 3 |
| <i>circPICALM</i> | miR-1305                 | 1 |
| <i>circPICALM</i> | miR-1306-5p              | 5 |
| <i>circPICALM</i> | miR-130b-5p              | 2 |
| <i>circPICALM</i> | miR-132-3p/212-3p        | 3 |
| <i>circPICALM</i> | miR-1322                 | 4 |
| <i>circPICALM</i> | miR-1323                 | 1 |
| <i>circPICALM</i> | miR-1324                 | 3 |
| <i>circPICALM</i> | miR-134-3p               | 3 |
| <i>circPICALM</i> | miR-134-5p               | 1 |
| <i>circPICALM</i> | miR-135-5p               | 1 |
| <i>circPICALM</i> | miR-137                  | 1 |
| <i>circPICALM</i> | miR-138-2-3p             | 5 |
| <i>circPICALM</i> | miR-139-5p               | 3 |
| <i>circPICALM</i> | miR-140-3p.1             | 1 |
| <i>circPICALM</i> | miR-141-3p/200-3p        | 3 |
| <i>circPICALM</i> | miR-141-5p               | 3 |
| <i>circPICALM</i> | miR-142-3p.1             | 2 |
| <i>circPICALM</i> | miR-142-3p.2             | 1 |
| <i>circPICALM</i> | miR-143-3p               | 2 |
| <i>circPICALM</i> | miR-143-5p               | 4 |
| <i>circPICALM</i> | miR-144-3p               | 1 |
| <i>circPICALM</i> | miR-145-3p               | 6 |
| <i>circPICALM</i> | miR-145-5p               | 3 |
| <i>circPICALM</i> | miR-146-5p               | 2 |
| <i>circPICALM</i> | miR-146b-3p              | 1 |
| <i>circPICALM</i> | miR-1470                 | 1 |
| <i>circPICALM</i> | miR-148-3p/152-3p        | 1 |
| <i>circPICALM</i> | miR-148a-5p              | 2 |



|                   |                                      |    |
|-------------------|--------------------------------------|----|
| <i>circPICALM</i> | miR-148b-5p/6874-3p                  | 3  |
| <i>circPICALM</i> | miR-149-3p/4728-5p/6785-5p/6883-5p   | 1  |
| <i>circPICALM</i> | miR-15-5p/16-5p/195-5p/424-5p/497-5p | 2  |
| <i>circPICALM</i> | miR-150-3p                           | 1  |
| <i>circPICALM</i> | miR-150-5p                           | 3  |
| <i>circPICALM</i> | miR-151-3p                           | 1  |
| <i>circPICALM</i> | miR-153-5p                           | 3  |
| <i>circPICALM</i> | miR-1537-5p                          | 2  |
| <i>circPICALM</i> | miR-154-5p                           | 2  |
| <i>circPICALM</i> | miR-15b-3p                           | 1  |
| <i>circPICALM</i> | miR-16-1-3p                          | 2  |
| <i>circPICALM</i> | miR-17-3p                            | 2  |
| <i>circPICALM</i> | miR-17-5p/20-5p/93-5p/106-5p/519-3p  | 5  |
| <i>circPICALM</i> | miR-181-3p/4420                      | 2  |
| <i>circPICALM</i> | miR-182-5p                           | 2  |
| <i>circPICALM</i> | miR-1825                             | 3  |
| <i>circPICALM</i> | miR-183-5p.1                         | 2  |
| <i>circPICALM</i> | miR-185-3p                           | 3  |
| <i>circPICALM</i> | miR-186-5p                           | 13 |
| <i>circPICALM</i> | miR-188-3p                           | 4  |
| <i>circPICALM</i> | miR-18a-3p                           | 1  |
| <i>circPICALM</i> | miR-190-5p                           | 6  |
| <i>circPICALM</i> | miR-190a-3p                          | 3  |
| <i>circPICALM</i> | miR-1910-3p/6511a-5p                 | 3  |
| <i>circPICALM</i> | miR-192-3p                           | 3  |
| <i>circPICALM</i> | miR-193-3p                           | 1  |
| <i>circPICALM</i> | miR-194-3p                           | 4  |
| <i>circPICALM</i> | miR-194-5p                           | 2  |
| <i>circPICALM</i> | miR-196-5p                           | 2  |
| <i>circPICALM</i> | miR-196a-3p                          | 3  |
| <i>circPICALM</i> | miR-1972                             | 1  |
| <i>circPICALM</i> | miR-1976                             | 4  |
| <i>circPICALM</i> | miR-199-3p                           | 2  |
| <i>circPICALM</i> | miR-199-5p                           | 3  |
| <i>circPICALM</i> | miR-200-3p/429                       | 1  |
| <i>circPICALM</i> | miR-200ab-5p                         | 1  |
| <i>circPICALM</i> | miR-200c-5p/550a-3p                  | 2  |
| <i>circPICALM</i> | miR-202-3p                           | 2  |

|                   |                     |   |
|-------------------|---------------------|---|
| <i>circPICALM</i> | miR-202-5p          | 1 |
| <i>circPICALM</i> | miR-203a-3p.1       | 3 |
| <i>circPICALM</i> | miR-203b-3p         | 7 |
| <i>circPICALM</i> | miR-203b-5p/6718-5p | 4 |
| <i>circPICALM</i> | miR-204-3p/4646-5p  | 1 |
| <i>circPICALM</i> | miR-204-5p/211-5p   | 1 |
| <i>circPICALM</i> | miR-205-3p          | 3 |
| <i>circPICALM</i> | miR-205-5p          | 4 |
| <i>circPICALM</i> | miR-2053            | 3 |
| <i>circPICALM</i> | miR-2054            | 7 |
| <i>circPICALM</i> | miR-208-5p          | 5 |
| <i>circPICALM</i> | miR-20a-3p          | 1 |
| <i>circPICALM</i> | miR-20b-3p          | 1 |
| <i>circPICALM</i> | miR-21-3p/3591-3p   | 1 |
| <i>circPICALM</i> | miR-21-5p/590-5p    | 2 |
| <i>circPICALM</i> | miR-210-5p          | 2 |
| <i>circPICALM</i> | miR-2110            | 2 |
| <i>circPICALM</i> | miR-2114-3p         | 1 |
| <i>circPICALM</i> | miR-2115-3p         | 1 |
| <i>circPICALM</i> | miR-2115-5p         | 2 |
| <i>circPICALM</i> | miR-2116-3p         | 3 |
| <i>circPICALM</i> | miR-2116-5p         | 4 |
| <i>circPICALM</i> | miR-2117            | 1 |
| <i>circPICALM</i> | miR-212-5p          | 2 |
| <i>circPICALM</i> | miR-214-3p/3619-5p  | 3 |
| <i>circPICALM</i> | miR-214-5p          | 1 |
| <i>circPICALM</i> | miR-215-3p          | 2 |
| <i>circPICALM</i> | miR-216a-5p         | 2 |
| <i>circPICALM</i> | miR-216b-3p         | 1 |
| <i>circPICALM</i> | miR-216b-5p         | 2 |
| <i>circPICALM</i> | miR-217             | 5 |
| <i>circPICALM</i> | miR-219-5p          | 2 |
| <i>circPICALM</i> | miR-219a-2-3p       | 4 |
| <i>circPICALM</i> | miR-219b-3p         | 4 |
| <i>circPICALM</i> | miR-22-3p           | 3 |
| <i>circPICALM</i> | miR-22-5p           | 4 |
| <i>circPICALM</i> | miR-221-5p/8073     | 3 |
| <i>circPICALM</i> | miR-222-5p          | 3 |

|                   |                                     |   |
|-------------------|-------------------------------------|---|
| <i>circPICALM</i> | miR-223-5p                          | 3 |
| <i>circPICALM</i> | miR-2276-3p                         | 3 |
| <i>circPICALM</i> | miR-2392                            | 4 |
| <i>circPICALM</i> | miR-2467-3p                         | 1 |
| <i>circPICALM</i> | miR-25-3p/32-5p/92-3p/363-3p/367-3p | 3 |
| <i>circPICALM</i> | miR-2681-3p                         | 1 |
| <i>circPICALM</i> | miR-2681-5p                         | 3 |
| <i>circPICALM</i> | miR-2682-3p/6781-3p                 | 5 |
| <i>circPICALM</i> | miR-26b-3p                          | 2 |
| <i>circPICALM</i> | miR-27-3p                           | 3 |
| <i>circPICALM</i> | miR-27b-5p                          | 1 |
| <i>circPICALM</i> | miR-28-5p/708-5p                    | 1 |
| <i>circPICALM</i> | miR-29-3p                           | 2 |
| <i>circPICALM</i> | miR-29a-5p                          | 5 |
| <i>circPICALM</i> | miR-29b-1-5p                        | 2 |
| <i>circPICALM</i> | miR-29b-2-5p                        | 1 |
| <i>circPICALM</i> | miR-30-3p                           | 2 |
| <i>circPICALM</i> | miR-301a-5p/301b-5p                 | 3 |
| <i>circPICALM</i> | miR-302a-5p                         | 4 |
| <i>circPICALM</i> | miR-302b-5p/302d-5p                 | 7 |
| <i>circPICALM</i> | miR-302c-3p.2/520-3p                | 1 |
| <i>circPICALM</i> | miR-302c-5p                         | 4 |
| <i>circPICALM</i> | miR-302f                            | 1 |
| <i>circPICALM</i> | miR-3064-3p                         | 3 |
| <i>circPICALM</i> | miR-3065-3p                         | 2 |
| <i>circPICALM</i> | miR-3065-5p                         | 2 |
| <i>circPICALM</i> | miR-3074-5p                         | 6 |
| <i>circPICALM</i> | miR-31-5p                           | 3 |
| <i>circPICALM</i> | miR-3117-3p                         | 2 |
| <i>circPICALM</i> | miR-3117-5p                         | 1 |
| <i>circPICALM</i> | miR-3119                            | 1 |
| <i>circPICALM</i> | miR-3120-3p                         | 1 |
| <i>circPICALM</i> | miR-3120-5p                         | 1 |
| <i>circPICALM</i> | miR-3121-5p                         | 1 |
| <i>circPICALM</i> | miR-3124-3p                         | 6 |
| <i>circPICALM</i> | miR-3125/3916/6859-5p               | 3 |
| <i>circPICALM</i> | miR-3126-5p                         | 2 |
| <i>circPICALM</i> | miR-3127-3p/6756-3p                 | 1 |

|                   |                          |    |
|-------------------|--------------------------|----|
| <i>circPICALM</i> | miR-3128                 | 4  |
| <i>circPICALM</i> | miR-3129-3p/5583-5p      | 1  |
| <i>circPICALM</i> | miR-3130-3p              | 2  |
| <i>circPICALM</i> | miR-3133                 | 13 |
| <i>circPICALM</i> | miR-3134                 | 2  |
| <i>circPICALM</i> | miR-3136-5p/4439         | 2  |
| <i>circPICALM</i> | miR-3137                 | 1  |
| <i>circPICALM</i> | miR-3138                 | 3  |
| <i>circPICALM</i> | miR-3140-3p              | 4  |
| <i>circPICALM</i> | miR-3140-5p              | 1  |
| <i>circPICALM</i> | miR-3143                 | 2  |
| <i>circPICALM</i> | miR-3144-3p              | 2  |
| <i>circPICALM</i> | miR-3145-3p              | 2  |
| <i>circPICALM</i> | miR-3145-5p              | 1  |
| <i>circPICALM</i> | miR-3147                 | 2  |
| <i>circPICALM</i> | miR-3148                 | 4  |
| <i>circPICALM</i> | miR-3149                 | 1  |
| <i>circPICALM</i> | miR-3150a-3p             | 2  |
| <i>circPICALM</i> | miR-3150a-5p/3150b-5p    | 2  |
| <i>circPICALM</i> | miR-3152-3p              | 2  |
| <i>circPICALM</i> | miR-3152-5p              | 1  |
| <i>circPICALM</i> | miR-3153/6733-5p/6739-5p | 4  |
| <i>circPICALM</i> | miR-3154                 | 1  |
| <i>circPICALM</i> | miR-3156-3p              | 4  |
| <i>circPICALM</i> | miR-3158-5p              | 2  |
| <i>circPICALM</i> | miR-3159                 | 1  |
| <i>circPICALM</i> | miR-3160-3p              | 2  |
| <i>circPICALM</i> | miR-3161                 | 2  |
| <i>circPICALM</i> | miR-3163                 | 1  |
| <i>circPICALM</i> | miR-3164                 | 1  |
| <i>circPICALM</i> | miR-3165                 | 2  |
| <i>circPICALM</i> | miR-3166                 | 1  |
| <i>circPICALM</i> | miR-3168                 | 3  |
| <i>circPICALM</i> | miR-3170/6855-5p         | 4  |
| <i>circPICALM</i> | miR-3171                 | 5  |
| <i>circPICALM</i> | miR-3173-3p/6891-5p      | 1  |
| <i>circPICALM</i> | miR-3173-5p              | 1  |
| <i>circPICALM</i> | miR-3175                 | 1  |

|                   |                           |   |
|-------------------|---------------------------|---|
| <i>circPICALM</i> | miR-3176/3922-3p          | 1 |
| <i>circPICALM</i> | miR-3177-5p               | 2 |
| <i>circPICALM</i> | miR-3180-5p               | 1 |
| <i>circPICALM</i> | miR-3183/4723-3p/6769b-3p | 5 |
| <i>circPICALM</i> | miR-3184-3p               | 1 |
| <i>circPICALM</i> | miR-3185                  | 4 |
| <i>circPICALM</i> | miR-3186-5p               | 1 |
| <i>circPICALM</i> | miR-3189-3p               | 2 |
| <i>circPICALM</i> | miR-3190-3p               | 1 |
| <i>circPICALM</i> | miR-3190-5p               | 1 |
| <i>circPICALM</i> | miR-3191-5p               | 5 |
| <i>circPICALM</i> | miR-3192-3p               | 4 |
| <i>circPICALM</i> | miR-3192-5p               | 1 |
| <i>circPICALM</i> | miR-3193                  | 3 |
| <i>circPICALM</i> | miR-3194-5p               | 1 |
| <i>circPICALM</i> | miR-3197                  | 1 |
| <i>circPICALM</i> | miR-3198/4309             | 4 |
| <i>circPICALM</i> | miR-32-3p                 | 1 |
| <i>circPICALM</i> | miR-320                   | 5 |
| <i>circPICALM</i> | miR-3200-3p               | 4 |
| <i>circPICALM</i> | miR-3200-5p               | 4 |
| <i>circPICALM</i> | miR-3201/4791             | 2 |
| <i>circPICALM</i> | miR-3202                  | 2 |
| <i>circPICALM</i> | miR-320e                  | 2 |
| <i>circPICALM</i> | miR-323a-5p               | 2 |
| <i>circPICALM</i> | miR-324-3p/1913           | 1 |
| <i>circPICALM</i> | miR-328-3p                | 1 |
| <i>circPICALM</i> | miR-329-3p/362-3p         | 1 |
| <i>circPICALM</i> | miR-329-5p                | 2 |
| <i>circPICALM</i> | miR-33-5p                 | 5 |
| <i>circPICALM</i> | miR-330-3p                | 1 |
| <i>circPICALM</i> | miR-330-3p.2              | 6 |
| <i>circPICALM</i> | miR-331-3p                | 3 |
| <i>circPICALM</i> | miR-331-5p                | 1 |
| <i>circPICALM</i> | miR-335-3p                | 4 |
| <i>circPICALM</i> | miR-337-3p                | 1 |
| <i>circPICALM</i> | miR-338-5p                | 2 |
| <i>circPICALM</i> | miR-339-5p                | 5 |

|                   |                       |   |
|-------------------|-----------------------|---|
| <i>circPICALM</i> | miR-33a-3p            | 8 |
| <i>circPICALM</i> | miR-34-5p/449-5p      | 1 |
| <i>circPICALM</i> | miR-340-3p/6827-3p    | 1 |
| <i>circPICALM</i> | miR-340-5p            | 1 |
| <i>circPICALM</i> | miR-342-3p            | 3 |
| <i>circPICALM</i> | miR-345-3p            | 1 |
| <i>circPICALM</i> | miR-346               | 1 |
| <i>circPICALM</i> | miR-34b-3p            | 1 |
| <i>circPICALM</i> | miR-34b-5p/449c-5p    | 3 |
| <i>circPICALM</i> | miR-34c-3p            | 1 |
| <i>circPICALM</i> | miR-3529-3p           | 2 |
| <i>circPICALM</i> | miR-3591-5p           | 3 |
| <i>circPICALM</i> | miR-3606-5p           | 1 |
| <i>circPICALM</i> | miR-3607-3p           | 3 |
| <i>circPICALM</i> | miR-3607-5p           | 1 |
| <i>circPICALM</i> | miR-361-3p            | 1 |
| <i>circPICALM</i> | miR-361-5p            | 1 |
| <i>circPICALM</i> | miR-3611              | 3 |
| <i>circPICALM</i> | miR-3613-3p           | 3 |
| <i>circPICALM</i> | miR-3614-3p           | 1 |
| <i>circPICALM</i> | miR-3618              | 2 |
| <i>circPICALM</i> | miR-362-5p/500b-5p    | 5 |
| <i>circPICALM</i> | miR-3620-3p           | 1 |
| <i>circPICALM</i> | miR-3622a-3p/3622b-3p | 1 |
| <i>circPICALM</i> | miR-3622a-5p          | 4 |
| <i>circPICALM</i> | miR-3622b-5p          | 5 |
| <i>circPICALM</i> | miR-363-5p/6745       | 1 |
| <i>circPICALM</i> | miR-3646              | 3 |
| <i>circPICALM</i> | miR-365-3p            | 1 |
| <i>circPICALM</i> | miR-3651              | 1 |
| <i>circPICALM</i> | miR-3653-3p           | 2 |
| <i>circPICALM</i> | miR-3653-5p           | 4 |
| <i>circPICALM</i> | miR-3654              | 1 |
| <i>circPICALM</i> | miR-3655              | 1 |
| <i>circPICALM</i> | miR-3658              | 3 |
| <i>circPICALM</i> | miR-3662              | 3 |
| <i>circPICALM</i> | miR-3663-3p           | 1 |
| <i>circPICALM</i> | miR-3663-5p           | 3 |

|                   |                                   |   |
|-------------------|-----------------------------------|---|
| <i>circPICALM</i> | miR-3664-3p                       | 1 |
| <i>circPICALM</i> | miR-3667-3p                       | 3 |
| <i>circPICALM</i> | miR-3667-5p                       | 1 |
| <i>circPICALM</i> | miR-367-5p                        | 9 |
| <i>circPICALM</i> | miR-3671                          | 1 |
| <i>circPICALM</i> | miR-3672/6864-3p                  | 1 |
| <i>circPICALM</i> | miR-3674                          | 2 |
| <i>circPICALM</i> | miR-3675-3p                       | 4 |
| <i>circPICALM</i> | miR-3675-5p                       | 5 |
| <i>circPICALM</i> | miR-3677-5p                       | 4 |
| <i>circPICALM</i> | miR-3678-3p                       | 1 |
| <i>circPICALM</i> | miR-3680-3p                       | 3 |
| <i>circPICALM</i> | miR-3680-5p                       | 1 |
| <i>circPICALM</i> | miR-3681-5p                       | 5 |
| <i>circPICALM</i> | miR-3682-3p                       | 3 |
| <i>circPICALM</i> | miR-3685                          | 1 |
| <i>circPICALM</i> | miR-3686                          | 1 |
| <i>circPICALM</i> | miR-3688-3p                       | 3 |
| <i>circPICALM</i> | miR-3689a-5p/3689b-5p/3689e/3689f | 2 |
| <i>circPICALM</i> | miR-3691-5p                       | 4 |
| <i>circPICALM</i> | miR-3692-3p                       | 2 |
| <i>circPICALM</i> | miR-3692-5p                       | 2 |
| <i>circPICALM</i> | miR-370-3p                        | 3 |
| <i>circPICALM</i> | miR-371-5p                        | 4 |
| <i>circPICALM</i> | miR-3713                          | 2 |
| <i>circPICALM</i> | miR-3714                          | 1 |
| <i>circPICALM</i> | miR-371b-5p/373-5p/616-5p         | 4 |
| <i>circPICALM</i> | miR-372-5p                        | 4 |
| <i>circPICALM</i> | miR-374a-3p                       | 1 |
| <i>circPICALM</i> | miR-374b-3p                       | 1 |
| <i>circPICALM</i> | miR-374c-3p                       | 1 |
| <i>circPICALM</i> | miR-375                           | 6 |
| <i>circPICALM</i> | miR-376a-2-5p                     | 2 |
| <i>circPICALM</i> | miR-376a-5p                       | 2 |
| <i>circPICALM</i> | miR-376b-5p/376c-5p               | 2 |
| <i>circPICALM</i> | miR-376c-3p                       | 1 |
| <i>circPICALM</i> | miR-377-5p/6086                   | 2 |
| <i>circPICALM</i> | miR-378a-5p                       | 1 |

|                   |                     |   |
|-------------------|---------------------|---|
| <i>circPICALM</i> | miR-379-5p          | 1 |
| <i>circPICALM</i> | miR-380-5p/563      | 1 |
| <i>circPICALM</i> | miR-381-3p          | 2 |
| <i>circPICALM</i> | miR-382-3p          | 1 |
| <i>circPICALM</i> | miR-382-5p          | 6 |
| <i>circPICALM</i> | miR-383-3p          | 2 |
| <i>circPICALM</i> | miR-383-5p.2        | 1 |
| <i>circPICALM</i> | miR-384             | 1 |
| <i>circPICALM</i> | miR-3908            | 5 |
| <i>circPICALM</i> | miR-3910            | 1 |
| <i>circPICALM</i> | miR-3913-3p         | 2 |
| <i>circPICALM</i> | miR-3914            | 2 |
| <i>circPICALM</i> | miR-3915            | 1 |
| <i>circPICALM</i> | miR-3918            | 1 |
| <i>circPICALM</i> | miR-3921/4653-5p    | 3 |
| <i>circPICALM</i> | miR-3924            | 2 |
| <i>circPICALM</i> | miR-3925-3p         | 1 |
| <i>circPICALM</i> | miR-3926            | 1 |
| <i>circPICALM</i> | miR-3927-3p/6831-5p | 2 |
| <i>circPICALM</i> | miR-3927-5p         | 3 |
| <i>circPICALM</i> | miR-3928-3p         | 5 |
| <i>circPICALM</i> | miR-3928-5p/6806-3p | 1 |
| <i>circPICALM</i> | miR-3934-3p         | 1 |
| <i>circPICALM</i> | miR-3934-5p         | 2 |
| <i>circPICALM</i> | miR-3935            | 6 |
| <i>circPICALM</i> | miR-3938            | 1 |
| <i>circPICALM</i> | miR-3942-3p         | 3 |
| <i>circPICALM</i> | miR-3942-5p         | 5 |
| <i>circPICALM</i> | miR-3943            | 1 |
| <i>circPICALM</i> | miR-3945            | 1 |
| <i>circPICALM</i> | miR-3973            | 4 |
| <i>circPICALM</i> | miR-3974            | 1 |
| <i>circPICALM</i> | miR-3977            | 1 |
| <i>circPICALM</i> | miR-3978            | 2 |
| <i>circPICALM</i> | miR-409-3p          | 1 |
| <i>circPICALM</i> | miR-410-3p          | 1 |
| <i>circPICALM</i> | miR-411-3p          | 1 |
| <i>circPICALM</i> | miR-411-5p.1        | 3 |



|                   |                    |   |
|-------------------|--------------------|---|
| <i>circPICALM</i> | miR-411-5p.2       | 5 |
| <i>circPICALM</i> | miR-424-3p         | 1 |
| <i>circPICALM</i> | miR-425-5p         | 2 |
| <i>circPICALM</i> | miR-4253/6862-5p   | 1 |
| <i>circPICALM</i> | miR-4255           | 5 |
| <i>circPICALM</i> | miR-4256           | 3 |
| <i>circPICALM</i> | miR-4257           | 3 |
| <i>circPICALM</i> | miR-4259           | 4 |
| <i>circPICALM</i> | miR-4260           | 2 |
| <i>circPICALM</i> | miR-4263           | 5 |
| <i>circPICALM</i> | miR-4264           | 2 |
| <i>circPICALM</i> | miR-4265/4296/4322 | 3 |
| <i>circPICALM</i> | miR-4266           | 1 |
| <i>circPICALM</i> | miR-4268           | 2 |
| <i>circPICALM</i> | miR-4269/6715b-5p  | 8 |
| <i>circPICALM</i> | miR-4273/7156-5p   | 4 |
| <i>circPICALM</i> | miR-4274           | 4 |
| <i>circPICALM</i> | miR-4275           | 1 |
| <i>circPICALM</i> | miR-4276           | 2 |
| <i>circPICALM</i> | miR-4277           | 2 |
| <i>circPICALM</i> | miR-4279           | 3 |
| <i>circPICALM</i> | miR-4282           | 2 |
| <i>circPICALM</i> | miR-4283           | 2 |
| <i>circPICALM</i> | miR-4287/4685-3p   | 1 |
| <i>circPICALM</i> | miR-4289           | 1 |
| <i>circPICALM</i> | miR-4291           | 2 |
| <i>circPICALM</i> | miR-4292/6791-5p   | 4 |
| <i>circPICALM</i> | miR-4293           | 1 |
| <i>circPICALM</i> | miR-4294           | 2 |
| <i>circPICALM</i> | miR-4297/5581-5p   | 3 |
| <i>circPICALM</i> | miR-4302           | 5 |
| <i>circPICALM</i> | miR-4307           | 8 |
| <i>circPICALM</i> | miR-4308           | 4 |
| <i>circPICALM</i> | miR-431-5p         | 1 |
| <i>circPICALM</i> | miR-4310/7157-5p   | 4 |
| <i>circPICALM</i> | miR-4311           | 1 |
| <i>circPICALM</i> | miR-4312           | 1 |
| <i>circPICALM</i> | miR-4313           | 1 |

|                   |                                              |   |
|-------------------|----------------------------------------------|---|
| <i>circPICALM</i> | miR-4314                                     | 2 |
| <i>circPICALM</i> | miR-432-3p                                   | 4 |
| <i>circPICALM</i> | miR-432-5p                                   | 6 |
| <i>circPICALM</i> | miR-4320                                     | 3 |
| <i>circPICALM</i> | miR-4323                                     | 1 |
| <i>circPICALM</i> | miR-4325                                     | 2 |
| <i>circPICALM</i> | miR-4326                                     | 5 |
| <i>circPICALM</i> | miR-4327                                     | 1 |
| <i>circPICALM</i> | miR-4328                                     | 5 |
| <i>circPICALM</i> | miR-433-3p                                   | 4 |
| <i>circPICALM</i> | miR-4330                                     | 4 |
| <i>circPICALM</i> | miR-4417                                     | 3 |
| <i>circPICALM</i> | miR-4419a/4510/6127/6129/6130/6133           | 2 |
| <i>circPICALM</i> | miR-4421/5699-3p                             | 1 |
| <i>circPICALM</i> | miR-4422                                     | 6 |
| <i>circPICALM</i> | miR-4423-3p                                  | 1 |
| <i>circPICALM</i> | miR-4423-5p                                  | 4 |
| <i>circPICALM</i> | miR-4424                                     | 2 |
| <i>circPICALM</i> | miR-4425                                     | 2 |
| <i>circPICALM</i> | miR-4426/4647/4662b                          | 2 |
| <i>circPICALM</i> | miR-4428                                     | 1 |
| <i>circPICALM</i> | miR-4432                                     | 2 |
| <i>circPICALM</i> | miR-4433a-3p                                 | 3 |
| <i>circPICALM</i> | miR-4433b-3p                                 | 1 |
| <i>circPICALM</i> | miR-4434/4516/5703                           | 1 |
| <i>circPICALM</i> | miR-4436b-3p/4632-5p/6735-5p/6879-5p/7843-5p |   |
| <i>circPICALM</i> | miR-4436b-5p                                 | 2 |
| <i>circPICALM</i> | miR-4438                                     | 5 |
| <i>circPICALM</i> | miR-4445-5p                                  | 2 |
| <i>circPICALM</i> | miR-4448                                     | 2 |
| <i>circPICALM</i> | miR-4450                                     | 2 |
| <i>circPICALM</i> | miR-4451                                     | 1 |
| <i>circPICALM</i> | miR-4457                                     | 1 |
| <i>circPICALM</i> | miR-4459                                     | 3 |
| <i>circPICALM</i> | miR-4460                                     | 3 |
| <i>circPICALM</i> | miR-4463                                     | 1 |
| <i>circPICALM</i> | miR-4464/4748                                | 1 |
| <i>circPICALM</i> | miR-4469                                     | 1 |

|                   |                   |   |
|-------------------|-------------------|---|
| <i>circPICALM</i> | miR-4470          | 1 |
| <i>circPICALM</i> | miR-4473          | 1 |
| <i>circPICALM</i> | miR-4475          | 5 |
| <i>circPICALM</i> | miR-4476/6876-5p  | 3 |
| <i>circPICALM</i> | miR-4477a         | 5 |
| <i>circPICALM</i> | miR-4477b         | 1 |
| <i>circPICALM</i> | miR-4482-3p       | 1 |
| <i>circPICALM</i> | miR-4484          | 2 |
| <i>circPICALM</i> | miR-4487          | 2 |
| <i>circPICALM</i> | miR-4489          | 2 |
| <i>circPICALM</i> | miR-4495          | 4 |
| <i>circPICALM</i> | miR-4496          | 2 |
| <i>circPICALM</i> | miR-4499          | 1 |
| <i>circPICALM</i> | miR-4501          | 4 |
| <i>circPICALM</i> | miR-4502          | 6 |
| <i>circPICALM</i> | miR-4503          | 1 |
| <i>circPICALM</i> | miR-4506          | 6 |
| <i>circPICALM</i> | miR-4509          | 1 |
| <i>circPICALM</i> | miR-450a-2-3p     | 2 |
| <i>circPICALM</i> | miR-450b-5p       | 3 |
| <i>circPICALM</i> | miR-4511          | 9 |
| <i>circPICALM</i> | miR-4514/4692     | 8 |
| <i>circPICALM</i> | miR-4519          | 4 |
| <i>circPICALM</i> | miR-452-3p        | 4 |
| <i>circPICALM</i> | miR-452-5p/892-3p | 4 |
| <i>circPICALM</i> | miR-4521          | 1 |
| <i>circPICALM</i> | miR-4524-5p       | 2 |
| <i>circPICALM</i> | miR-4524b-3p      | 1 |
| <i>circPICALM</i> | miR-4528          | 1 |
| <i>circPICALM</i> | miR-4533          | 2 |
| <i>circPICALM</i> | miR-4534/8082     | 2 |
| <i>circPICALM</i> | miR-4536-5p       | 2 |
| <i>circPICALM</i> | miR-454-5p        | 1 |
| <i>circPICALM</i> | miR-455-3p.2      | 4 |
| <i>circPICALM</i> | miR-4635          | 2 |
| <i>circPICALM</i> | miR-4639-5p       | 1 |
| <i>circPICALM</i> | miR-4640-3p       | 3 |
| <i>circPICALM</i> | miR-4642          | 3 |

|                   |                          |   |
|-------------------|--------------------------|---|
| <i>circPICALM</i> | miR-4643                 | 1 |
| <i>circPICALM</i> | miR-4645-3p              | 2 |
| <i>circPICALM</i> | miR-4649-3p              | 1 |
| <i>circPICALM</i> | miR-4650-3p              | 1 |
| <i>circPICALM</i> | miR-4650-5p              | 1 |
| <i>circPICALM</i> | miR-4652-3p              | 2 |
| <i>circPICALM</i> | miR-4653-3p              | 2 |
| <i>circPICALM</i> | miR-4656                 | 2 |
| <i>circPICALM</i> | miR-4659a-3p/4659b-3p    | 4 |
| <i>circPICALM</i> | miR-4659a-5p/4659b-5p    | 3 |
| <i>circPICALM</i> | miR-4662-5p              | 3 |
| <i>circPICALM</i> | miR-4662a-3p             | 3 |
| <i>circPICALM</i> | miR-4663                 | 1 |
| <i>circPICALM</i> | miR-4666a-3p             | 2 |
| <i>circPICALM</i> | miR-4666a-5p             | 4 |
| <i>circPICALM</i> | miR-4666b                | 1 |
| <i>circPICALM</i> | miR-4667-3p              | 1 |
| <i>circPICALM</i> | miR-4667-5p/4700-5p/8089 | 4 |
| <i>circPICALM</i> | miR-4668-3p              | 2 |
| <i>circPICALM</i> | miR-4668-5p              | 4 |
| <i>circPICALM</i> | miR-4670-3p              | 3 |
| <i>circPICALM</i> | miR-4671-3p              | 1 |
| <i>circPICALM</i> | miR-4671-5p              | 1 |
| <i>circPICALM</i> | miR-4675/4741            | 2 |
| <i>circPICALM</i> | miR-4677-5p              | 4 |
| <i>circPICALM</i> | miR-4680-5p              | 1 |
| <i>circPICALM</i> | miR-4684-3p              | 5 |
| <i>circPICALM</i> | miR-4684-5p              | 1 |
| <i>circPICALM</i> | miR-4686                 | 1 |
| <i>circPICALM</i> | miR-4689/6858-5p         | 1 |
| <i>circPICALM</i> | miR-4690-5p              | 6 |
| <i>circPICALM</i> | miR-4691-3p              | 4 |
| <i>circPICALM</i> | miR-4693-5p              | 1 |
| <i>circPICALM</i> | miR-4694-3p              | 7 |
| <i>circPICALM</i> | miR-4694-5p              | 1 |
| <i>circPICALM</i> | miR-4695-5p              | 2 |
| <i>circPICALM</i> | miR-4696                 | 2 |
| <i>circPICALM</i> | miR-4698                 | 1 |

|                   |                                  |   |
|-------------------|----------------------------------|---|
| <i>circPICALM</i> | miR-4699-3p                      | 1 |
| <i>circPICALM</i> | miR-4699-5p                      | 1 |
| <i>circPICALM</i> | miR-4703-3p                      | 1 |
| <i>circPICALM</i> | miR-4704-3p                      | 1 |
| <i>circPICALM</i> | miR-4704-5p                      | 1 |
| <i>circPICALM</i> | miR-4708-5p                      | 2 |
| <i>circPICALM</i> | miR-4709-3p                      | 4 |
| <i>circPICALM</i> | miR-4709-5p                      | 5 |
| <i>circPICALM</i> | miR-4711-3p                      | 3 |
| <i>circPICALM</i> | miR-4712-3p                      | 6 |
| <i>circPICALM</i> | miR-4713-3p                      | 3 |
| <i>circPICALM</i> | miR-4713-5p                      | 1 |
| <i>circPICALM</i> | miR-4714-3p                      | 5 |
| <i>circPICALM</i> | miR-4715-5p                      | 4 |
| <i>circPICALM</i> | miR-4717-3p                      | 1 |
| <i>circPICALM</i> | miR-4717-5p                      | 1 |
| <i>circPICALM</i> | miR-4718                         | 2 |
| <i>circPICALM</i> | miR-4719                         | 8 |
| <i>circPICALM</i> | miR-4720-3p                      | 3 |
| <i>circPICALM</i> | miR-4720-5p/4799-3p/5588-5p      | 4 |
| <i>circPICALM</i> | miR-4722-5p                      | 3 |
| <i>circPICALM</i> | miR-4723-5p/5698/6870-5p/7111-5p | 1 |
| <i>circPICALM</i> | miR-4727-3p                      | 3 |
| <i>circPICALM</i> | miR-4728-3p                      | 7 |
| <i>circPICALM</i> | miR-4729                         | 6 |
| <i>circPICALM</i> | miR-4731-3p/4801                 | 1 |
| <i>circPICALM</i> | miR-4733-3p                      | 1 |
| <i>circPICALM</i> | miR-4733-5p                      | 1 |
| <i>circPICALM</i> | miR-4735-5p                      | 4 |
| <i>circPICALM</i> | miR-4742-3p                      | 4 |
| <i>circPICALM</i> | miR-4742-5p                      | 8 |
| <i>circPICALM</i> | miR-4743-3p                      | 2 |
| <i>circPICALM</i> | miR-4744                         | 1 |
| <i>circPICALM</i> | miR-4747-3p                      | 2 |
| <i>circPICALM</i> | miR-4747-5p/5196-5p              | 2 |
| <i>circPICALM</i> | miR-4749-3p                      | 2 |
| <i>circPICALM</i> | miR-4750-3p                      | 4 |
| <i>circPICALM</i> | miR-4752                         | 1 |

|                   |                     |   |
|-------------------|---------------------|---|
| <i>circPICALM</i> | miR-4753-5p         | 1 |
| <i>circPICALM</i> | miR-4755-5p/5006-3p | 4 |
| <i>circPICALM</i> | miR-4757-3p         | 1 |
| <i>circPICALM</i> | miR-4757-5p/6744-3p | 3 |
| <i>circPICALM</i> | miR-4760-3p         | 3 |
| <i>circPICALM</i> | miR-4760-5p/8061    | 3 |
| <i>circPICALM</i> | miR-4761-3p         | 1 |
| <i>circPICALM</i> | miR-4761-5p         | 1 |
| <i>circPICALM</i> | miR-4762-5p         | 1 |
| <i>circPICALM</i> | miR-4766-3p         | 8 |
| <i>circPICALM</i> | miR-4768-3p         | 3 |
| <i>circPICALM</i> | miR-4768-5p/6833-3p | 1 |
| <i>circPICALM</i> | miR-4771            | 1 |
| <i>circPICALM</i> | miR-4772-3p         | 3 |
| <i>circPICALM</i> | miR-4773            | 7 |
| <i>circPICALM</i> | miR-4774-3p         | 1 |
| <i>circPICALM</i> | miR-4775            | 3 |
| <i>circPICALM</i> | miR-4776-3p         | 3 |
| <i>circPICALM</i> | miR-4777-3p         | 2 |
| <i>circPICALM</i> | miR-4778-3p         | 3 |
| <i>circPICALM</i> | miR-4778-5p         | 2 |
| <i>circPICALM</i> | miR-4779            | 2 |
| <i>circPICALM</i> | miR-4780            | 1 |
| <i>circPICALM</i> | miR-4781-3p         | 1 |
| <i>circPICALM</i> | miR-4786-5p         | 1 |
| <i>circPICALM</i> | miR-4789-3p         | 1 |
| <i>circPICALM</i> | miR-4789-5p         | 1 |
| <i>circPICALM</i> | miR-4790-3p         | 1 |
| <i>circPICALM</i> | miR-4793-3p         | 2 |
| <i>circPICALM</i> | miR-4793-5p         | 1 |
| <i>circPICALM</i> | miR-4795-3p         | 1 |
| <i>circPICALM</i> | miR-4795-5p         | 3 |
| <i>circPICALM</i> | miR-4796-3p         | 4 |
| <i>circPICALM</i> | miR-4796-5p         | 4 |
| <i>circPICALM</i> | miR-4797-3p         | 2 |
| <i>circPICALM</i> | miR-4797-5p         | 2 |
| <i>circPICALM</i> | miR-4798-3p         | 1 |
| <i>circPICALM</i> | miR-4799-5p         | 1 |

|                   |                     |   |
|-------------------|---------------------|---|
| <i>circPICALM</i> | miR-4800-5p         | 3 |
| <i>circPICALM</i> | miR-4802-3p         | 1 |
| <i>circPICALM</i> | miR-4802-5p         | 2 |
| <i>circPICALM</i> | miR-4803            | 2 |
| <i>circPICALM</i> | miR-4804-3p         | 3 |
| <i>circPICALM</i> | miR-483-3p.1        | 2 |
| <i>circPICALM</i> | miR-483-3p.2        | 1 |
| <i>circPICALM</i> | miR-486-3p          | 2 |
| <i>circPICALM</i> | miR-486-5p          | 8 |
| <i>circPICALM</i> | miR-488-3p          | 7 |
| <i>circPICALM</i> | miR-489-3p          | 5 |
| <i>circPICALM</i> | miR-491-3p          | 1 |
| <i>circPICALM</i> | miR-493-3p          | 1 |
| <i>circPICALM</i> | miR-493-5p          | 5 |
| <i>circPICALM</i> | miR-494-3p          | 1 |
| <i>circPICALM</i> | miR-495-3p          | 1 |
| <i>circPICALM</i> | miR-495-5p          | 6 |
| <i>circPICALM</i> | miR-496.1           | 2 |
| <i>circPICALM</i> | miR-496.2           | 1 |
| <i>circPICALM</i> | miR-497-3p          | 4 |
| <i>circPICALM</i> | miR-498             | 1 |
| <i>circPICALM</i> | miR-4999-3p         | 1 |
| <i>circPICALM</i> | miR-4999-5p         | 2 |
| <i>circPICALM</i> | miR-499a-3p/499b-3p | 1 |
| <i>circPICALM</i> | miR-5002-3p         | 2 |
| <i>circPICALM</i> | miR-5002-5p         | 1 |
| <i>circPICALM</i> | miR-5003-3p         | 6 |
| <i>circPICALM</i> | miR-5004-3p         | 5 |
| <i>circPICALM</i> | miR-5008-5p         | 1 |
| <i>circPICALM</i> | miR-5009-3p         | 3 |
| <i>circPICALM</i> | miR-5009-5p/8058    | 3 |
| <i>circPICALM</i> | miR-500a-3p         | 3 |
| <i>circPICALM</i> | miR-500a-5p         | 3 |
| <i>circPICALM</i> | miR-500b-3p         | 1 |
| <i>circPICALM</i> | miR-501-3p/502-3p   | 1 |
| <i>circPICALM</i> | miR-501-5p          | 5 |
| <i>circPICALM</i> | miR-5010-5p         | 1 |
| <i>circPICALM</i> | miR-5011-3p         | 1 |

|                   |                             |   |
|-------------------|-----------------------------|---|
| <i>circPICALM</i> | miR-5011-5p                 | 3 |
| <i>circPICALM</i> | miR-502-5p                  | 3 |
| <i>circPICALM</i> | miR-503-3p                  | 1 |
| <i>circPICALM</i> | miR-503-5p                  | 2 |
| <i>circPICALM</i> | miR-504-5p.1                | 1 |
| <i>circPICALM</i> | miR-505-3p.1                | 4 |
| <i>circPICALM</i> | miR-506-5p                  | 4 |
| <i>circPICALM</i> | miR-507/557                 | 3 |
| <i>circPICALM</i> | miR-508-3p                  | 2 |
| <i>circPICALM</i> | miR-508-5p                  | 1 |
| <i>circPICALM</i> | miR-5088-3p                 | 1 |
| <i>circPICALM</i> | miR-5089-3p                 | 4 |
| <i>circPICALM</i> | miR-509-3-5p/509-5p/4418    | 5 |
| <i>circPICALM</i> | miR-5092                    | 3 |
| <i>circPICALM</i> | miR-5093                    | 3 |
| <i>circPICALM</i> | miR-5096                    | 7 |
| <i>circPICALM</i> | miR-510-3p                  | 4 |
| <i>circPICALM</i> | miR-5100                    | 3 |
| <i>circPICALM</i> | miR-511-3p                  | 1 |
| <i>circPICALM</i> | miR-511-5p                  | 4 |
| <i>circPICALM</i> | miR-512-3p                  | 1 |
| <i>circPICALM</i> | miR-512-5p                  | 1 |
| <i>circPICALM</i> | miR-513a-3p/513c-3p/3606-3p | 3 |
| <i>circPICALM</i> | miR-513a-5p                 | 3 |
| <i>circPICALM</i> | miR-513b-3p                 | 1 |
| <i>circPICALM</i> | miR-513b-5p                 | 5 |
| <i>circPICALM</i> | miR-513c-5p/514b-5p         | 3 |
| <i>circPICALM</i> | miR-514a-3p                 | 7 |
| <i>circPICALM</i> | miR-515-5p/519e-5p          | 2 |
| <i>circPICALM</i> | miR-516a-3p/516b-3p/7162-5p | 2 |
| <i>circPICALM</i> | miR-5188                    | 1 |
| <i>circPICALM</i> | miR-5189-3p                 | 4 |
| <i>circPICALM</i> | miR-518a-5p/527             | 3 |
| <i>circPICALM</i> | miR-5190                    | 1 |
| <i>circPICALM</i> | miR-5193                    | 1 |
| <i>circPICALM</i> | miR-5195-5p                 | 2 |
| <i>circPICALM</i> | miR-5196-3p                 | 1 |
| <i>circPICALM</i> | miR-5197-5p                 | 6 |



|                   |                                                                  |   |
|-------------------|------------------------------------------------------------------|---|
| <i>circPICALM</i> | miR-519d-5p                                                      | 2 |
| <i>circPICALM</i> | miR-520f-5p                                                      | 1 |
| <i>circPICALM</i> | miR-520g-3p                                                      | 4 |
| <i>circPICALM</i> | miR-522-3p                                                       | 7 |
| <i>circPICALM</i> | miR-524-5p                                                       | 7 |
| <i>circPICALM</i> | miR-526b-5p                                                      | 4 |
| <i>circPICALM</i> | miR-532-3p                                                       | 3 |
| <i>circPICALM</i> | miR-539-3p                                                       | 4 |
| <i>circPICALM</i> | miR-539-5p                                                       | 3 |
| <i>circPICALM</i> | miR-541-5p                                                       | 4 |
| <i>circPICALM</i> | miR-543                                                          | 3 |
| <i>circPICALM</i> | miR-544a                                                         | 1 |
| <i>circPICALM</i> | miR-548ac/548bb-3p/548d-3p/548h-3p/548z                          |   |
| <i>circPICALM</i> | miR-548ad-3p                                                     | 1 |
| <i>circPICALM</i> | miR-548ah-5p/3609                                                | 5 |
| <i>circPICALM</i> | miR-548ai/548ag/548ba/570-5p                                     | 1 |
| <i>circPICALM</i> | miR-548an                                                        | 2 |
| <i>circPICALM</i> | miR-548ao-3p                                                     | 1 |
| <i>circPICALM</i> | miR-548ap-3p/548aa/548t-3p                                       | 1 |
| <i>circPICALM</i> | miR-548aq-3p/548am-3p/548aj-3p/548ah-3p/548ae-3p/548j-3p/548x-3p |   |
| <i>circPICALM</i> | miR-548as-3p                                                     | 1 |
| <i>circPICALM</i> | miR-548at-5p                                                     | 2 |
| <i>circPICALM</i> | miR-548au-3p                                                     | 1 |
| <i>circPICALM</i> | miR-548av-3p                                                     | 2 |
| <i>circPICALM</i> | miR-548av-5p/548k/8054                                           | 3 |
| <i>circPICALM</i> | miR-548aw                                                        | 3 |
| <i>circPICALM</i> | miR-548ay-3p/548at-3p                                            | 1 |
| <i>circPICALM</i> | miR-548ay-5p/548au-5p/548as-5p/548ar-3p/548aq-5p/548ap-5p/548am- |   |
| <i>circPICALM</i> | miR-548az-3p/548ar-3p/548a-3p/548e-3p/548f-3p                    |   |
| <i>circPICALM</i> | miR-548az-5p/548t-5p                                             | 5 |
| <i>circPICALM</i> | miR-548b-3p                                                      | 9 |
| <i>circPICALM</i> | miR-548c-3p                                                      | 3 |
| <i>circPICALM</i> | miR-548e-5p                                                      | 4 |
| <i>circPICALM</i> | miR-548g-3p                                                      | 3 |
| <i>circPICALM</i> | miR-548l                                                         | 3 |
| <i>circPICALM</i> | miR-548m                                                         | 2 |
| <i>circPICALM</i> | miR-548n                                                         | 5 |
| <i>circPICALM</i> | miR-548u/7161-5p                                                 | 3 |

|                   |             |   |
|-------------------|-------------|---|
| <i>circPICALM</i> | miR-550b-3p | 1 |
| <i>circPICALM</i> | miR-551b-5p | 2 |
| <i>circPICALM</i> | miR-552-3p  | 1 |
| <i>circPICALM</i> | miR-552-5p  | 5 |
| <i>circPICALM</i> | miR-555     | 3 |
| <i>circPICALM</i> | miR-556-5p  | 1 |
| <i>circPICALM</i> | miR-5571-5p | 4 |
| <i>circPICALM</i> | miR-5572    | 2 |
| <i>circPICALM</i> | miR-5579-3p | 2 |
| <i>circPICALM</i> | miR-5579-5p | 2 |
| <i>circPICALM</i> | miR-558     | 2 |
| <i>circPICALM</i> | miR-5580-3p | 2 |
| <i>circPICALM</i> | miR-5580-5p | 1 |
| <i>circPICALM</i> | miR-5582-3p | 3 |
| <i>circPICALM</i> | miR-5582-5p | 4 |
| <i>circPICALM</i> | miR-5584-3p | 3 |
| <i>circPICALM</i> | miR-5584-5p | 3 |
| <i>circPICALM</i> | miR-5585-3p | 1 |
| <i>circPICALM</i> | miR-5586-5p | 1 |
| <i>circPICALM</i> | miR-5589-3p | 1 |
| <i>circPICALM</i> | miR-5590-5p | 3 |
| <i>circPICALM</i> | miR-561-3p  | 2 |
| <i>circPICALM</i> | miR-561-5p  | 1 |
| <i>circPICALM</i> | miR-562     | 3 |
| <i>circPICALM</i> | miR-564     | 3 |
| <i>circPICALM</i> | miR-567     | 1 |
| <i>circPICALM</i> | miR-568     | 1 |
| <i>circPICALM</i> | miR-5680    | 1 |
| <i>circPICALM</i> | miR-5681a   | 3 |
| <i>circPICALM</i> | miR-5687    | 3 |
| <i>circPICALM</i> | miR-5689    | 1 |
| <i>circPICALM</i> | miR-569     | 4 |
| <i>circPICALM</i> | miR-5690    | 1 |
| <i>circPICALM</i> | miR-5691    | 2 |
| <i>circPICALM</i> | miR-5692a   | 2 |
| <i>circPICALM</i> | miR-5693    | 4 |
| <i>circPICALM</i> | miR-5694    | 1 |
| <i>circPICALM</i> | miR-5695    | 2 |

|                   |                 |   |
|-------------------|-----------------|---|
| <i>circPICALM</i> | miR-5696        | 3 |
| <i>circPICALM</i> | miR-5697        | 1 |
| <i>circPICALM</i> | miR-570-3p      | 1 |
| <i>circPICALM</i> | miR-5700        | 5 |
| <i>circPICALM</i> | miR-5701        | 3 |
| <i>circPICALM</i> | miR-5702        | 2 |
| <i>circPICALM</i> | miR-5707        | 4 |
| <i>circPICALM</i> | miR-573/3616-5p | 1 |
| <i>circPICALM</i> | miR-575/4676-5p | 1 |
| <i>circPICALM</i> | miR-576-3p      | 3 |
| <i>circPICALM</i> | miR-576-5p      | 5 |
| <i>circPICALM</i> | miR-577         | 2 |
| <i>circPICALM</i> | miR-578         | 4 |
| <i>circPICALM</i> | miR-579-3p      | 3 |
| <i>circPICALM</i> | miR-580-3p      | 3 |
| <i>circPICALM</i> | miR-580-5p      | 4 |
| <i>circPICALM</i> | miR-581         | 3 |
| <i>circPICALM</i> | miR-582-3p      | 1 |
| <i>circPICALM</i> | miR-582-5p      | 1 |
| <i>circPICALM</i> | miR-583         | 1 |
| <i>circPICALM</i> | miR-584-5p      | 2 |
| <i>circPICALM</i> | miR-586         | 2 |
| <i>circPICALM</i> | miR-587         | 3 |
| <i>circPICALM</i> | miR-589-3p      | 6 |
| <i>circPICALM</i> | miR-589-5p      | 2 |
| <i>circPICALM</i> | miR-590-3p      | 3 |
| <i>circPICALM</i> | miR-591         | 1 |
| <i>circPICALM</i> | miR-592         | 2 |
| <i>circPICALM</i> | miR-593-5p      | 1 |
| <i>circPICALM</i> | miR-595         | 3 |
| <i>circPICALM</i> | miR-596         | 1 |
| <i>circPICALM</i> | miR-597-5p      | 1 |
| <i>circPICALM</i> | miR-599         | 2 |
| <i>circPICALM</i> | miR-601         | 3 |
| <i>circPICALM</i> | miR-603         | 1 |
| <i>circPICALM</i> | miR-605-5p      | 2 |
| <i>circPICALM</i> | miR-606         | 4 |
| <i>circPICALM</i> | miR-607         | 4 |

|                   |                    |   |
|-------------------|--------------------|---|
| <i>circPICALM</i> | miR-6071           | 4 |
| <i>circPICALM</i> | miR-6072/6891-3p   | 2 |
| <i>circPICALM</i> | miR-6073           | 2 |
| <i>circPICALM</i> | miR-6076/6797-3p   | 3 |
| <i>circPICALM</i> | miR-6077           | 3 |
| <i>circPICALM</i> | miR-6079           | 2 |
| <i>circPICALM</i> | miR-6081           | 1 |
| <i>circPICALM</i> | miR-6083           | 3 |
| <i>circPICALM</i> | miR-6087           | 1 |
| <i>circPICALM</i> | miR-6089           | 1 |
| <i>circPICALM</i> | miR-6124           | 4 |
| <i>circPICALM</i> | miR-6126           | 2 |
| <i>circPICALM</i> | miR-6128           | 1 |
| <i>circPICALM</i> | miR-6134           | 3 |
| <i>circPICALM</i> | miR-616-3p         | 1 |
| <i>circPICALM</i> | miR-6165           | 6 |
| <i>circPICALM</i> | miR-617            | 3 |
| <i>circPICALM</i> | miR-619-5p/6506-5p | 1 |
| <i>circPICALM</i> | miR-622            | 2 |
| <i>circPICALM</i> | miR-623            | 1 |
| <i>circPICALM</i> | miR-624-3p         | 2 |
| <i>circPICALM</i> | miR-625-5p         | 1 |
| <i>circPICALM</i> | miR-626/6876-3p    | 1 |
| <i>circPICALM</i> | miR-627-3p         | 3 |
| <i>circPICALM</i> | miR-629-3p         | 2 |
| <i>circPICALM</i> | miR-630            | 1 |
| <i>circPICALM</i> | miR-633            | 4 |
| <i>circPICALM</i> | miR-634            | 1 |
| <i>circPICALM</i> | miR-636            | 1 |
| <i>circPICALM</i> | miR-637            | 4 |
| <i>circPICALM</i> | miR-638            | 3 |
| <i>circPICALM</i> | miR-641/3617-5p    | 1 |
| <i>circPICALM</i> | miR-642-3p         | 1 |
| <i>circPICALM</i> | miR-643            | 1 |
| <i>circPICALM</i> | miR-646            | 2 |
| <i>circPICALM</i> | miR-6499-3p        | 3 |
| <i>circPICALM</i> | miR-6501-5p        | 4 |
| <i>circPICALM</i> | miR-6504-3p        | 1 |

|                   |              |   |
|-------------------|--------------|---|
| <i>circPICALM</i> | miR-6505-3p  | 3 |
| <i>circPICALM</i> | miR-6505-5p  | 6 |
| <i>circPICALM</i> | miR-6507-5p  | 1 |
| <i>circPICALM</i> | miR-6509-3p  | 2 |
| <i>circPICALM</i> | miR-6509-5p  | 1 |
| <i>circPICALM</i> | miR-651-3p   | 3 |
| <i>circPICALM</i> | miR-651-5p   | 2 |
| <i>circPICALM</i> | miR-6510-5p  | 6 |
| <i>circPICALM</i> | miR-6511-5p  | 1 |
| <i>circPICALM</i> | miR-6512-5p  | 1 |
| <i>circPICALM</i> | miR-6513-3p  | 1 |
| <i>circPICALM</i> | miR-6514-5p  | 2 |
| <i>circPICALM</i> | miR-6516-3p  | 1 |
| <i>circPICALM</i> | miR-6516-5p  | 4 |
| <i>circPICALM</i> | miR-652-5p   | 1 |
| <i>circPICALM</i> | miR-653-3p   | 2 |
| <i>circPICALM</i> | miR-654-3p   | 3 |
| <i>circPICALM</i> | miR-655-5p   | 2 |
| <i>circPICALM</i> | miR-656-3p   | 1 |
| <i>circPICALM</i> | miR-656-5p   | 1 |
| <i>circPICALM</i> | miR-660-3p   | 1 |
| <i>circPICALM</i> | miR-660-5p   | 1 |
| <i>circPICALM</i> | miR-663b     | 4 |
| <i>circPICALM</i> | miR-664a-3p  | 4 |
| <i>circPICALM</i> | miR-668-3p   | 1 |
| <i>circPICALM</i> | miR-668-5p   | 2 |
| <i>circPICALM</i> | miR-670-3p   | 3 |
| <i>circPICALM</i> | miR-670-5p   | 4 |
| <i>circPICALM</i> | miR-6715a-3p | 4 |
| <i>circPICALM</i> | miR-6715b-3p | 3 |
| <i>circPICALM</i> | miR-6720-3p  | 2 |
| <i>circPICALM</i> | miR-6721-5p  | 3 |
| <i>circPICALM</i> | miR-6728-3p  | 1 |
| <i>circPICALM</i> | miR-6729-3p  | 1 |
| <i>circPICALM</i> | miR-6730-5p  | 3 |
| <i>circPICALM</i> | miR-6732-3p  | 1 |
| <i>circPICALM</i> | miR-6733-3p  | 5 |
| <i>circPICALM</i> | miR-6734-3p  | 3 |

|                   |                             |   |
|-------------------|-----------------------------|---|
| <i>circPICALM</i> | miR-6737-5p/6812-5p/6819-5p | 4 |
| <i>circPICALM</i> | miR-6738-3p                 | 1 |
| <i>circPICALM</i> | miR-6739-3p                 | 4 |
| <i>circPICALM</i> | miR-6740-3p                 | 6 |
| <i>circPICALM</i> | miR-6740-5p                 | 2 |
| <i>circPICALM</i> | miR-6741-5p                 | 1 |
| <i>circPICALM</i> | miR-6742-3p                 | 1 |
| <i>circPICALM</i> | miR-6744-5p                 | 5 |
| <i>circPICALM</i> | miR-6748-3p                 | 1 |
| <i>circPICALM</i> | miR-6750-3p                 | 2 |
| <i>circPICALM</i> | miR-6750-5p/6822-5p         | 3 |
| <i>circPICALM</i> | miR-6751-5p/6803-5p         | 2 |
| <i>circPICALM</i> | miR-6753-5p                 | 2 |
| <i>circPICALM</i> | miR-6756-5p/6766-5p         | 1 |
| <i>circPICALM</i> | miR-6757-3p                 | 2 |
| <i>circPICALM</i> | miR-6757-5p                 | 4 |
| <i>circPICALM</i> | miR-6758-3p                 | 1 |
| <i>circPICALM</i> | miR-6758-5p/6856-5p         | 1 |
| <i>circPICALM</i> | miR-6759-3p                 | 2 |
| <i>circPICALM</i> | miR-6759-5p                 | 3 |
| <i>circPICALM</i> | miR-676-5p                  | 4 |
| <i>circPICALM</i> | miR-6760-3p                 | 4 |
| <i>circPICALM</i> | miR-6765-3p                 | 1 |
| <i>circPICALM</i> | miR-6765-5p                 | 1 |
| <i>circPICALM</i> | miR-6768-3p                 | 2 |
| <i>circPICALM</i> | miR-6768-5p                 | 1 |
| <i>circPICALM</i> | miR-6769a-3p                | 1 |
| <i>circPICALM</i> | miR-6771-3p                 | 1 |
| <i>circPICALM</i> | miR-6772-3p                 | 2 |
| <i>circPICALM</i> | miR-6773-3p                 | 2 |
| <i>circPICALM</i> | miR-6776-3p                 | 1 |
| <i>circPICALM</i> | miR-6778-3p                 | 1 |
| <i>circPICALM</i> | miR-6780b-3p                | 1 |
| <i>circPICALM</i> | miR-6782-3p                 | 5 |
| <i>circPICALM</i> | miR-6787-3p                 | 2 |
| <i>circPICALM</i> | miR-6790-3p                 | 2 |
| <i>circPICALM</i> | miR-6791-3p/6829-3p         | 1 |
| <i>circPICALM</i> | miR-6792-5p                 | 1 |

|                   |                     |   |
|-------------------|---------------------|---|
| <i>circPICALM</i> | miR-6794-3p         | 1 |
| <i>circPICALM</i> | miR-6796-5p         | 3 |
| <i>circPICALM</i> | miR-6798-3p         | 1 |
| <i>circPICALM</i> | miR-6799-5p         | 1 |
| <i>circPICALM</i> | miR-6800-3p         | 2 |
| <i>circPICALM</i> | miR-6800-5p         | 2 |
| <i>circPICALM</i> | miR-6801-3p/6810-3p | 3 |
| <i>circPICALM</i> | miR-6802-3p         | 1 |
| <i>circPICALM</i> | miR-6802-5p         | 2 |
| <i>circPICALM</i> | miR-6807-5p         | 1 |
| <i>circPICALM</i> | miR-6809-3p         | 1 |
| <i>circPICALM</i> | miR-6809-5p         | 3 |
| <i>circPICALM</i> | miR-6810-5p         | 2 |
| <i>circPICALM</i> | miR-6811-3p         | 1 |
| <i>circPICALM</i> | miR-6813-3p         | 4 |
| <i>circPICALM</i> | miR-6815-3p         | 1 |
| <i>circPICALM</i> | miR-6815-5p/6865-5p | 2 |
| <i>circPICALM</i> | miR-6817-3p         | 2 |
| <i>circPICALM</i> | miR-6819-3p/6877-3p | 2 |
| <i>circPICALM</i> | miR-6821-3p         | 2 |
| <i>circPICALM</i> | miR-6825-5p         | 1 |
| <i>circPICALM</i> | miR-6827-5p         | 3 |
| <i>circPICALM</i> | miR-6828-3p         | 4 |
| <i>circPICALM</i> | miR-6829-5p         | 2 |
| <i>circPICALM</i> | miR-6830-5p         | 1 |
| <i>circPICALM</i> | miR-6832-3p         | 1 |
| <i>circPICALM</i> | miR-6833-5p         | 1 |
| <i>circPICALM</i> | miR-6836-3p         | 1 |
| <i>circPICALM</i> | miR-6843-3p/6848-3p | 4 |
| <i>circPICALM</i> | miR-6845-3p         | 2 |
| <i>circPICALM</i> | miR-6846-5p/6848-5p | 1 |
| <i>circPICALM</i> | miR-6847-5p         | 3 |
| <i>circPICALM</i> | miR-6849-3p         | 2 |
| <i>circPICALM</i> | miR-6851-3p         | 1 |
| <i>circPICALM</i> | miR-6852-5p         | 1 |
| <i>circPICALM</i> | miR-6853-3p         | 1 |
| <i>circPICALM</i> | miR-6854-3p         | 1 |
| <i>circPICALM</i> | miR-6856-3p         | 2 |

|                   |             |   |
|-------------------|-------------|---|
| <i>circPICALM</i> | miR-6857-5p | 2 |
| <i>circPICALM</i> | miR-6858-3p | 1 |
| <i>circPICALM</i> | miR-6864-5p | 2 |
| <i>circPICALM</i> | miR-6865-3p | 2 |
| <i>circPICALM</i> | miR-6866-5p | 3 |
| <i>circPICALM</i> | miR-6867-3p | 1 |
| <i>circPICALM</i> | miR-6868-3p | 2 |
| <i>circPICALM</i> | miR-6868-5p | 4 |
| <i>circPICALM</i> | miR-6870-3p | 1 |
| <i>circPICALM</i> | miR-6871-3p | 2 |
| <i>circPICALM</i> | miR-6871-5p | 2 |
| <i>circPICALM</i> | miR-6873-3p | 1 |
| <i>circPICALM</i> | miR-6875-3p | 4 |
| <i>circPICALM</i> | miR-6878-3p | 8 |
| <i>circPICALM</i> | miR-6880-5p | 2 |
| <i>circPICALM</i> | miR-6881-5p | 4 |
| <i>circPICALM</i> | miR-6882-3p | 4 |
| <i>circPICALM</i> | miR-6882-5p | 5 |
| <i>circPICALM</i> | miR-6885-3p | 1 |
| <i>circPICALM</i> | miR-6888-5p | 1 |
| <i>circPICALM</i> | miR-6890-3p | 1 |
| <i>circPICALM</i> | miR-6890-5p | 5 |
| <i>circPICALM</i> | miR-6894-5p | 1 |
| <i>circPICALM</i> | miR-7-3p    | 2 |
| <i>circPICALM</i> | miR-7-5p    | 3 |
| <i>circPICALM</i> | miR-708-3p  | 4 |
| <i>circPICALM</i> | miR-7106-5p | 1 |
| <i>circPICALM</i> | miR-7109-5p | 2 |
| <i>circPICALM</i> | miR-7110-3p | 2 |
| <i>circPICALM</i> | miR-7113-3p | 1 |
| <i>circPICALM</i> | miR-7114-5p | 1 |
| <i>circPICALM</i> | miR-7150    | 1 |
| <i>circPICALM</i> | miR-7152-3p | 3 |
| <i>circPICALM</i> | miR-7152-5p | 6 |
| <i>circPICALM</i> | miR-7153-3p | 1 |
| <i>circPICALM</i> | miR-7154-3p | 1 |
| <i>circPICALM</i> | miR-7154-5p | 4 |
| <i>circPICALM</i> | miR-7155-5p | 4 |



|                   |                           |   |
|-------------------|---------------------------|---|
| <i>circPICALM</i> | miR-7156-3p               | 4 |
| <i>circPICALM</i> | miR-7158-3p               | 7 |
| <i>circPICALM</i> | miR-7159-3p               | 1 |
| <i>circPICALM</i> | miR-7160-5p               | 1 |
| <i>circPICALM</i> | miR-7162-3p               | 1 |
| <i>circPICALM</i> | miR-744-3p                | 5 |
| <i>circPICALM</i> | miR-758-3p                | 1 |
| <i>circPICALM</i> | miR-758-5p                | 1 |
| <i>circPICALM</i> | miR-759                   | 1 |
| <i>circPICALM</i> | miR-762/4492/4498/5001-5p | 2 |
| <i>circPICALM</i> | miR-7641                  | 2 |
| <i>circPICALM</i> | miR-765                   | 1 |
| <i>circPICALM</i> | miR-766-3p                | 1 |
| <i>circPICALM</i> | miR-766-5p                | 1 |
| <i>circPICALM</i> | miR-767-5p                | 3 |
| <i>circPICALM</i> | miR-769-5p                | 1 |
| <i>circPICALM</i> | miR-770-5p                | 3 |
| <i>circPICALM</i> | miR-7702                  | 1 |
| <i>circPICALM</i> | miR-7703                  | 2 |
| <i>circPICALM</i> | miR-7844-5p               | 1 |
| <i>circPICALM</i> | miR-7849-3p               | 2 |
| <i>circPICALM</i> | miR-7850-5p               | 5 |
| <i>circPICALM</i> | miR-7854-3p               | 3 |
| <i>circPICALM</i> | miR-7855-5p               | 3 |
| <i>circPICALM</i> | miR-7856-5p               | 4 |
| <i>circPICALM</i> | miR-7976                  | 1 |
| <i>circPICALM</i> | miR-8056                  | 4 |
| <i>circPICALM</i> | miR-8060                  | 4 |
| <i>circPICALM</i> | miR-8063                  | 1 |
| <i>circPICALM</i> | miR-8066                  | 4 |
| <i>circPICALM</i> | miR-8068                  | 5 |
| <i>circPICALM</i> | miR-8070                  | 1 |
| <i>circPICALM</i> | miR-8071                  | 2 |
| <i>circPICALM</i> | miR-8075                  | 2 |
| <i>circPICALM</i> | miR-8076                  | 3 |
| <i>circPICALM</i> | miR-8077                  | 1 |
| <i>circPICALM</i> | miR-8084                  | 1 |
| <i>circPICALM</i> | miR-8087                  | 2 |

|                   |                         |   |
|-------------------|-------------------------|---|
| <i>circPICALM</i> | miR-8485                | 1 |
| <i>circPICALM</i> | miR-873-5p.1            | 1 |
| <i>circPICALM</i> | miR-873-5p.2            | 3 |
| <i>circPICALM</i> | miR-874-5p              | 2 |
| <i>circPICALM</i> | miR-875-3p              | 3 |
| <i>circPICALM</i> | miR-875-5p              | 2 |
| <i>circPICALM</i> | miR-876-3p              | 2 |
| <i>circPICALM</i> | miR-876-5p              | 2 |
| <i>circPICALM</i> | miR-877-5p              | 3 |
| <i>circPICALM</i> | miR-885-3p              | 4 |
| <i>circPICALM</i> | miR-885-5p              | 2 |
| <i>circPICALM</i> | miR-888-3p              | 1 |
| <i>circPICALM</i> | miR-889-3p              | 3 |
| <i>circPICALM</i> | miR-889-5p              | 1 |
| <i>circPICALM</i> | miR-890                 | 3 |
| <i>circPICALM</i> | miR-891b                | 2 |
| <i>circPICALM</i> | miR-892-5p              | 4 |
| <i>circPICALM</i> | miR-892b                | 4 |
| <i>circPICALM</i> | miR-9-3p                | 1 |
| <i>circPICALM</i> | miR-9-5p                | 3 |
| <i>circPICALM</i> | miR-921                 | 1 |
| <i>circPICALM</i> | miR-922                 | 3 |
| <i>circPICALM</i> | miR-93-3p               | 2 |
| <i>circPICALM</i> | miR-934                 | 2 |
| <i>circPICALM</i> | miR-935                 | 2 |
| <i>circPICALM</i> | miR-936                 | 2 |
| <i>circPICALM</i> | miR-939-3p              | 1 |
| <i>circPICALM</i> | miR-939-5p/1343-5p      | 1 |
| <i>circPICALM</i> | miR-940/6808-5p/6893-5p | 3 |
| <i>circPICALM</i> | miR-942-5p              | 1 |
| <i>circPICALM</i> | miR-943                 | 2 |
| <i>circPICALM</i> | miR-944                 | 3 |
| <i>circPICALM</i> | miR-95-5p               | 1 |
| <i>circPICALM</i> | miR-9500                | 3 |
| <i>circPICALM</i> | miR-96-3p               | 1 |
| <i>circPICALM</i> | miR-96-5p/1271-5p       | 2 |
| <i>circPICALM</i> | miR-23-3p               | 1 |
| <i>circPICALM</i> | miR-3156-5p             | 1 |

|                    |                       |   |
|--------------------|-----------------------|---|
| <i>circPICALM</i>  | miR-504-3p            | 1 |
| <i>circPICALM</i>  | miR-6731-5p/8085      | 1 |
| <i>circPICALM</i>  | miR-6878-5p           | 1 |
| <i>circPLEKHM3</i> | let-7a-2-3p/let-7g-3p | 1 |
| <i>circPLEKHM3</i> | let-7c-3p             | 1 |
| <i>circPLEKHM3</i> | miR-106a-3p           | 1 |
| <i>circPLEKHM3</i> | miR-1180-5p           | 1 |
| <i>circPLEKHM3</i> | miR-1184              | 2 |
| <i>circPLEKHM3</i> | miR-1185-5p           | 2 |
| <i>circPLEKHM3</i> | miR-1193              | 1 |
| <i>circPLEKHM3</i> | miR-1199-3p           | 1 |
| <i>circPLEKHM3</i> | miR-1200              | 2 |
| <i>circPLEKHM3</i> | miR-1205              | 2 |
| <i>circPLEKHM3</i> | miR-1206              | 1 |
| <i>circPLEKHM3</i> | miR-1207-3p           | 1 |
| <i>circPLEKHM3</i> | miR-1224-3p           | 1 |
| <i>circPLEKHM3</i> | miR-1224-5p           | 2 |
| <i>circPLEKHM3</i> | miR-1225-3p           | 1 |
| <i>circPLEKHM3</i> | miR-1234-3p/7107-5p   | 2 |
| <i>circPLEKHM3</i> | miR-1250-3p           | 4 |
| <i>circPLEKHM3</i> | miR-1251-3p           | 4 |
| <i>circPLEKHM3</i> | miR-125a-3p           | 1 |
| <i>circPLEKHM3</i> | miR-1264              | 2 |
| <i>circPLEKHM3</i> | miR-1266-5p/4518      | 4 |
| <i>circPLEKHM3</i> | miR-1270              | 1 |
| <i>circPLEKHM3</i> | miR-1273g-3p          | 2 |
| <i>circPLEKHM3</i> | miR-1273h-3p          | 2 |
| <i>circPLEKHM3</i> | miR-1281              | 2 |
| <i>circPLEKHM3</i> | miR-1283              | 2 |
| <i>circPLEKHM3</i> | miR-129-5p            | 1 |
| <i>circPLEKHM3</i> | miR-1290              | 1 |
| <i>circPLEKHM3</i> | miR-1295b-5p/1912     | 1 |
| <i>circPLEKHM3</i> | miR-1298-3p           | 1 |
| <i>circPLEKHM3</i> | miR-1304-3p           | 2 |
| <i>circPLEKHM3</i> | miR-1304-5p           | 1 |
| <i>circPLEKHM3</i> | miR-1306-5p           | 1 |
| <i>circPLEKHM3</i> | miR-1307-3p           | 1 |
| <i>circPLEKHM3</i> | miR-130b-5p           | 1 |

|                    |                                     |   |
|--------------------|-------------------------------------|---|
| <i>circPLEKHM3</i> | miR-1323                            | 8 |
| <i>circPLEKHM3</i> | miR-133a-5p                         | 1 |
| <i>circPLEKHM3</i> | miR-1343-3p                         | 2 |
| <i>circPLEKHM3</i> | miR-136-5p                          | 1 |
| <i>circPLEKHM3</i> | miR-138-5p                          | 1 |
| <i>circPLEKHM3</i> | miR-143-5p                          | 1 |
| <i>circPLEKHM3</i> | miR-146a-3p                         | 2 |
| <i>circPLEKHM3</i> | miR-149-5p                          | 2 |
| <i>circPLEKHM3</i> | miR-150-5p                          | 1 |
| <i>circPLEKHM3</i> | miR-1537-3p                         | 1 |
| <i>circPLEKHM3</i> | miR-155-3p                          | 1 |
| <i>circPLEKHM3</i> | miR-17-3p                           | 2 |
| <i>circPLEKHM3</i> | miR-181-3p/4420                     | 2 |
| <i>circPLEKHM3</i> | miR-181a-2-3p                       | 1 |
| <i>circPLEKHM3</i> | miR-183-3p                          | 1 |
| <i>circPLEKHM3</i> | miR-185-5p                          | 2 |
| <i>circPLEKHM3</i> | miR-186-5p                          | 1 |
| <i>circPLEKHM3</i> | miR-18a-3p                          | 1 |
| <i>circPLEKHM3</i> | miR-19-3p                           | 1 |
| <i>circPLEKHM3</i> | miR-190-5p                          | 1 |
| <i>circPLEKHM3</i> | miR-1909-5p                         | 1 |
| <i>circPLEKHM3</i> | miR-1911-3p                         | 2 |
| <i>circPLEKHM3</i> | miR-193b-5p                         | 1 |
| <i>circPLEKHM3</i> | miR-194-5p                          | 1 |
| <i>circPLEKHM3</i> | miR-197-3p                          | 4 |
| <i>circPLEKHM3</i> | miR-1976                            | 2 |
| <i>circPLEKHM3</i> | miR-204-3p/4646-5p                  | 2 |
| <i>circPLEKHM3</i> | miR-21-3p/3591-3p                   | 1 |
| <i>circPLEKHM3</i> | miR-211-3p                          | 1 |
| <i>circPLEKHM3</i> | miR-2113                            | 2 |
| <i>circPLEKHM3</i> | miR-2116-3p                         | 1 |
| <i>circPLEKHM3</i> | miR-212-5p                          | 1 |
| <i>circPLEKHM3</i> | miR-217                             | 2 |
| <i>circPLEKHM3</i> | miR-22-3p                           | 2 |
| <i>circPLEKHM3</i> | miR-2276-3p                         | 2 |
| <i>circPLEKHM3</i> | miR-2467-3p                         | 2 |
| <i>circPLEKHM3</i> | miR-2467-5p                         | 4 |
| <i>circPLEKHM3</i> | miR-25-3p/32-5p/92-3p/363-3p/367-3p | 1 |

|                    |                                              |   |
|--------------------|----------------------------------------------|---|
| <i>circPLEKHM3</i> | miR-26-3p                                    | 1 |
| <i>circPLEKHM3</i> | miR-2681-3p                                  | 2 |
| <i>circPLEKHM3</i> | miR-298                                      | 3 |
| <i>circPLEKHM3</i> | miR-299-3p                                   | 2 |
| <i>circPLEKHM3</i> | miR-302b-5p/302d-5p                          | 1 |
| <i>circPLEKHM3</i> | miR-302c-3p.2/520-3p                         | 1 |
| <i>circPLEKHM3</i> | miR-3064-3p                                  | 1 |
| <i>circPLEKHM3</i> | miR-3065-5p                                  | 1 |
| <i>circPLEKHM3</i> | miR-30b-3p/1273h-5p/3689-3p/6779-5p/6780a-5p | 2 |
| <i>circPLEKHM3</i> | miR-30c-3p/6788-5p                           | 2 |
| <i>circPLEKHM3</i> | miR-31-5p                                    | 2 |
| <i>circPLEKHM3</i> | miR-3120-5p                                  | 1 |
| <i>circPLEKHM3</i> | miR-3121-3p                                  | 1 |
| <i>circPLEKHM3</i> | miR-3121-5p                                  | 1 |
| <i>circPLEKHM3</i> | miR-3122/3913-5p                             | 2 |
| <i>circPLEKHM3</i> | miR-3125/3916/6859-5p                        | 2 |
| <i>circPLEKHM3</i> | miR-3126-3p                                  | 1 |
| <i>circPLEKHM3</i> | miR-3126-5p                                  | 1 |
| <i>circPLEKHM3</i> | miR-3127-3p/6756-3p                          | 1 |
| <i>circPLEKHM3</i> | miR-3128                                     | 3 |
| <i>circPLEKHM3</i> | miR-3130-3p                                  | 1 |
| <i>circPLEKHM3</i> | miR-3130-5p/4482-5p                          | 1 |
| <i>circPLEKHM3</i> | miR-3133                                     | 1 |
| <i>circPLEKHM3</i> | miR-3140-5p                                  | 1 |
| <i>circPLEKHM3</i> | miR-3145-5p                                  | 1 |
| <i>circPLEKHM3</i> | miR-3150a-5p/3150b-5p                        | 2 |
| <i>circPLEKHM3</i> | miR-3150b-3p                                 | 2 |
| <i>circPLEKHM3</i> | miR-3153/6733-5p/6739-5p                     | 1 |
| <i>circPLEKHM3</i> | miR-3154                                     | 2 |
| <i>circPLEKHM3</i> | miR-3157-5p                                  | 2 |
| <i>circPLEKHM3</i> | miR-3158-5p                                  | 2 |
| <i>circPLEKHM3</i> | miR-3159                                     | 1 |
| <i>circPLEKHM3</i> | miR-3160-3p                                  | 4 |
| <i>circPLEKHM3</i> | miR-3161                                     | 1 |
| <i>circPLEKHM3</i> | miR-3163                                     | 2 |
| <i>circPLEKHM3</i> | miR-3169                                     | 2 |
| <i>circPLEKHM3</i> | miR-3170/6855-5p                             | 1 |
| <i>circPLEKHM3</i> | miR-3177-5p                                  | 1 |

|                    |                           |   |
|--------------------|---------------------------|---|
| <i>circPLEKHM3</i> | miR-3179                  | 1 |
| <i>circPLEKHM3</i> | miR-3183/4723-3p/6769b-3p | 1 |
| <i>circPLEKHM3</i> | miR-3184-3p               | 2 |
| <i>circPLEKHM3</i> | miR-3185                  | 4 |
| <i>circPLEKHM3</i> | miR-3186-5p               | 1 |
| <i>circPLEKHM3</i> | miR-3187-3p               | 2 |
| <i>circPLEKHM3</i> | miR-3188                  | 4 |
| <i>circPLEKHM3</i> | miR-3189-3p               | 1 |
| <i>circPLEKHM3</i> | miR-3189-5p               | 2 |
| <i>circPLEKHM3</i> | miR-3192-5p               | 2 |
| <i>circPLEKHM3</i> | miR-3198/4309             | 1 |
| <i>circPLEKHM3</i> | miR-320                   | 2 |
| <i>circPLEKHM3</i> | miR-3201/4791             | 1 |
| <i>circPLEKHM3</i> | miR-320e                  | 2 |
| <i>circPLEKHM3</i> | miR-324-3p/1913           | 1 |
| <i>circPLEKHM3</i> | miR-330-3p.2              | 1 |
| <i>circPLEKHM3</i> | miR-331-3p                | 2 |
| <i>circPLEKHM3</i> | miR-337-3p                | 1 |
| <i>circPLEKHM3</i> | miR-338-5p                | 1 |
| <i>circPLEKHM3</i> | miR-340-5p                | 1 |
| <i>circPLEKHM3</i> | miR-342-3p                | 1 |
| <i>circPLEKHM3</i> | miR-342-5p/4664-5p        | 1 |
| <i>circPLEKHM3</i> | miR-345-3p                | 1 |
| <i>circPLEKHM3</i> | miR-34a-3p                | 1 |
| <i>circPLEKHM3</i> | miR-3605-5p               | 2 |
| <i>circPLEKHM3</i> | miR-3611                  | 2 |
| <i>circPLEKHM3</i> | miR-3612                  | 6 |
| <i>circPLEKHM3</i> | miR-3614-3p               | 1 |
| <i>circPLEKHM3</i> | miR-3617-3p               | 1 |
| <i>circPLEKHM3</i> | miR-3622a-3p/3622b-3p     | 1 |
| <i>circPLEKHM3</i> | miR-3622a-5p              | 1 |
| <i>circPLEKHM3</i> | miR-3650                  | 2 |
| <i>circPLEKHM3</i> | miR-3652/4430             | 2 |
| <i>circPLEKHM3</i> | miR-3653-3p               | 1 |
| <i>circPLEKHM3</i> | miR-3653-5p               | 2 |
| <i>circPLEKHM3</i> | miR-3664-3p               | 4 |
| <i>circPLEKHM3</i> | miR-3674                  | 1 |
| <i>circPLEKHM3</i> | miR-3678-3p               | 2 |

|                    |                           |   |
|--------------------|---------------------------|---|
| <i>circPLEKHM3</i> | miR-3684                  | 1 |
| <i>circPLEKHM3</i> | miR-3686                  | 1 |
| <i>circPLEKHM3</i> | miR-3692-3p               | 1 |
| <i>circPLEKHM3</i> | miR-371-5p                | 2 |
| <i>circPLEKHM3</i> | miR-371b-5p/373-5p/616-5p | 2 |
| <i>circPLEKHM3</i> | miR-372-5p                | 2 |
| <i>circPLEKHM3</i> | miR-377-3p                | 4 |
| <i>circPLEKHM3</i> | miR-378a-5p               | 2 |
| <i>circPLEKHM3</i> | miR-381-3p                | 1 |
| <i>circPLEKHM3</i> | miR-3915                  | 2 |
| <i>circPLEKHM3</i> | miR-3919                  | 1 |
| <i>circPLEKHM3</i> | miR-3923                  | 1 |
| <i>circPLEKHM3</i> | miR-3925-3p               | 1 |
| <i>circPLEKHM3</i> | miR-3929/4419b/4478       | 2 |
| <i>circPLEKHM3</i> | miR-3934-5p               | 1 |
| <i>circPLEKHM3</i> | miR-3936                  | 1 |
| <i>circPLEKHM3</i> | miR-3937                  | 1 |
| <i>circPLEKHM3</i> | miR-3940-5p/4507          | 2 |
| <i>circPLEKHM3</i> | miR-3943                  | 1 |
| <i>circPLEKHM3</i> | miR-3974                  | 1 |
| <i>circPLEKHM3</i> | miR-3975                  | 4 |
| <i>circPLEKHM3</i> | miR-3976                  | 1 |
| <i>circPLEKHM3</i> | miR-409-3p                | 1 |
| <i>circPLEKHM3</i> | miR-411-5p.1              | 1 |
| <i>circPLEKHM3</i> | miR-411-5p.2              | 1 |
| <i>circPLEKHM3</i> | miR-421                   | 1 |
| <i>circPLEKHM3</i> | miR-4252                  | 1 |
| <i>circPLEKHM3</i> | miR-4258                  | 1 |
| <i>circPLEKHM3</i> | miR-4269/6715b-5p         | 1 |
| <i>circPLEKHM3</i> | miR-4270/4441/6754-5p     | 2 |
| <i>circPLEKHM3</i> | miR-4279                  | 1 |
| <i>circPLEKHM3</i> | miR-4282                  | 1 |
| <i>circPLEKHM3</i> | miR-4286                  | 1 |
| <i>circPLEKHM3</i> | miR-4299                  | 1 |
| <i>circPLEKHM3</i> | miR-4301                  | 1 |
| <i>circPLEKHM3</i> | miR-4312                  | 1 |
| <i>circPLEKHM3</i> | miR-4314                  | 1 |
| <i>circPLEKHM3</i> | miR-4320                  | 1 |

|                    |                                    |   |
|--------------------|------------------------------------|---|
| <i>circPLEKHM3</i> | miR-4323                           | 1 |
| <i>circPLEKHM3</i> | miR-4327                           | 1 |
| <i>circPLEKHM3</i> | miR-4419a/4510/6127/6129/6130/6133 | 1 |
| <i>circPLEKHM3</i> | miR-4421/5699-3p                   | 2 |
| <i>circPLEKHM3</i> | miR-4422                           | 1 |
| <i>circPLEKHM3</i> | miR-4427                           | 2 |
| <i>circPLEKHM3</i> | miR-4433b-5p                       | 1 |
| <i>circPLEKHM3</i> | miR-4435                           | 2 |
| <i>circPLEKHM3</i> | miR-4438                           | 2 |
| <i>circPLEKHM3</i> | miR-4452                           | 1 |
| <i>circPLEKHM3</i> | miR-4456                           | 1 |
| <i>circPLEKHM3</i> | miR-4463                           | 2 |
| <i>circPLEKHM3</i> | miR-4474-3p                        | 2 |
| <i>circPLEKHM3</i> | miR-4485-5p                        | 1 |
| <i>circPLEKHM3</i> | miR-4487                           | 4 |
| <i>circPLEKHM3</i> | miR-4491/4657                      | 2 |
| <i>circPLEKHM3</i> | miR-4493                           | 2 |
| <i>circPLEKHM3</i> | miR-4496                           | 1 |
| <i>circPLEKHM3</i> | miR-4499                           | 2 |
| <i>circPLEKHM3</i> | miR-4502                           | 1 |
| <i>circPLEKHM3</i> | miR-4505/5787                      | 2 |
| <i>circPLEKHM3</i> | miR-4509                           | 3 |
| <i>circPLEKHM3</i> | miR-450a-1-3p                      | 2 |
| <i>circPLEKHM3</i> | miR-450b-3p/769-3p                 | 2 |
| <i>circPLEKHM3</i> | miR-451                            | 1 |
| <i>circPLEKHM3</i> | miR-4513/6855-3p                   | 1 |
| <i>circPLEKHM3</i> | miR-4514/4692                      | 1 |
| <i>circPLEKHM3</i> | miR-452-3p                         | 1 |
| <i>circPLEKHM3</i> | miR-4531                           | 1 |
| <i>circPLEKHM3</i> | miR-4537                           | 1 |
| <i>circPLEKHM3</i> | miR-4539                           | 1 |
| <i>circPLEKHM3</i> | miR-454-5p                         | 2 |
| <i>circPLEKHM3</i> | miR-455-3p.2                       | 1 |
| <i>circPLEKHM3</i> | miR-4634                           | 1 |
| <i>circPLEKHM3</i> | miR-4638-5p                        | 1 |
| <i>circPLEKHM3</i> | miR-4639-3p                        | 1 |
| <i>circPLEKHM3</i> | miR-4639-5p                        | 1 |
| <i>circPLEKHM3</i> | miR-4645-5p/4673                   | 2 |



|                    |                             |   |
|--------------------|-----------------------------|---|
| <i>circPLEKHM3</i> | miR-4649-3p                 | 2 |
| <i>circPLEKHM3</i> | miR-4653-3p                 | 2 |
| <i>circPLEKHM3</i> | miR-4661-5p                 | 1 |
| <i>circPLEKHM3</i> | miR-4662-5p                 | 2 |
| <i>circPLEKHM3</i> | miR-4663                    | 4 |
| <i>circPLEKHM3</i> | miR-4665-3p                 | 1 |
| <i>circPLEKHM3</i> | miR-4666a-3p                | 1 |
| <i>circPLEKHM3</i> | miR-4667-5p/4700-5p/8089    | 2 |
| <i>circPLEKHM3</i> | miR-4668-5p                 | 1 |
| <i>circPLEKHM3</i> | miR-4671-5p                 | 1 |
| <i>circPLEKHM3</i> | miR-4677-3p                 | 2 |
| <i>circPLEKHM3</i> | miR-4679                    | 2 |
| <i>circPLEKHM3</i> | miR-4680-3p                 | 2 |
| <i>circPLEKHM3</i> | miR-4685-5p/6837-5p         | 2 |
| <i>circPLEKHM3</i> | miR-4689/6858-5p            | 2 |
| <i>circPLEKHM3</i> | miR-4690-3p/5685            | 1 |
| <i>circPLEKHM3</i> | miR-4691-5p/6792-3p         | 2 |
| <i>circPLEKHM3</i> | miR-4693-3p                 | 1 |
| <i>circPLEKHM3</i> | miR-4695-5p                 | 1 |
| <i>circPLEKHM3</i> | miR-4696                    | 1 |
| <i>circPLEKHM3</i> | miR-4705                    | 1 |
| <i>circPLEKHM3</i> | miR-4708-3p                 | 1 |
| <i>circPLEKHM3</i> | miR-4714-3p                 | 4 |
| <i>circPLEKHM3</i> | miR-4715-3p                 | 4 |
| <i>circPLEKHM3</i> | miR-4716-5p                 | 1 |
| <i>circPLEKHM3</i> | miR-4717-5p                 | 2 |
| <i>circPLEKHM3</i> | miR-4719                    | 1 |
| <i>circPLEKHM3</i> | miR-4720-5p/4799-3p/5588-5p | 3 |
| <i>circPLEKHM3</i> | miR-4722-3p/6727-3p         | 1 |
| <i>circPLEKHM3</i> | miR-4724-5p                 | 1 |
| <i>circPLEKHM3</i> | miR-4727-5p                 | 1 |
| <i>circPLEKHM3</i> | miR-4728-3p                 | 2 |
| <i>circPLEKHM3</i> | miR-4731-3p/4801            | 1 |
| <i>circPLEKHM3</i> | miR-4731-5p                 | 2 |
| <i>circPLEKHM3</i> | miR-4732-5p                 | 1 |
| <i>circPLEKHM3</i> | miR-4740-3p                 | 1 |
| <i>circPLEKHM3</i> | miR-4742-5p                 | 1 |
| <i>circPLEKHM3</i> | miR-4744                    | 3 |

|                    |                     |   |
|--------------------|---------------------|---|
| <i>circPLEKHM3</i> | miR-4751            | 2 |
| <i>circPLEKHM3</i> | miR-4752            | 1 |
| <i>circPLEKHM3</i> | miR-4753-3p         | 1 |
| <i>circPLEKHM3</i> | miR-4753-5p         | 1 |
| <i>circPLEKHM3</i> | miR-4755-3p         | 3 |
| <i>circPLEKHM3</i> | miR-4756-3p         | 1 |
| <i>circPLEKHM3</i> | miR-4757-5p/6744-3p | 2 |
| <i>circPLEKHM3</i> | miR-4758-3p         | 2 |
| <i>circPLEKHM3</i> | miR-4759            | 2 |
| <i>circPLEKHM3</i> | miR-4761-5p         | 1 |
| <i>circPLEKHM3</i> | miR-4762-3p         | 1 |
| <i>circPLEKHM3</i> | miR-4772-3p         | 2 |
| <i>circPLEKHM3</i> | miR-4773            | 2 |
| <i>circPLEKHM3</i> | miR-4776-3p         | 1 |
| <i>circPLEKHM3</i> | miR-4777-3p         | 1 |
| <i>circPLEKHM3</i> | miR-4777-5p         | 1 |
| <i>circPLEKHM3</i> | miR-4778-5p         | 1 |
| <i>circPLEKHM3</i> | miR-4779            | 1 |
| <i>circPLEKHM3</i> | miR-4781-3p         | 1 |
| <i>circPLEKHM3</i> | miR-4786-5p         | 2 |
| <i>circPLEKHM3</i> | miR-4793-3p         | 1 |
| <i>circPLEKHM3</i> | miR-4793-5p         | 2 |
| <i>circPLEKHM3</i> | miR-4802-3p         | 2 |
| <i>circPLEKHM3</i> | miR-4802-5p         | 2 |
| <i>circPLEKHM3</i> | miR-4804-5p         | 2 |
| <i>circPLEKHM3</i> | miR-483-3p.1        | 1 |
| <i>circPLEKHM3</i> | miR-484/3155        | 2 |
| <i>circPLEKHM3</i> | miR-485-5p          | 4 |
| <i>circPLEKHM3</i> | miR-488-3p          | 1 |
| <i>circPLEKHM3</i> | miR-488-5p          | 2 |
| <i>circPLEKHM3</i> | miR-490-5p          | 1 |
| <i>circPLEKHM3</i> | miR-493-3p          | 1 |
| <i>circPLEKHM3</i> | miR-493-5p          | 1 |
| <i>circPLEKHM3</i> | miR-498             | 2 |
| <i>circPLEKHM3</i> | miR-5001-3p         | 1 |
| <i>circPLEKHM3</i> | miR-5004-5p         | 2 |
| <i>circPLEKHM3</i> | miR-5007-5p         | 2 |
| <i>circPLEKHM3</i> | miR-5009-3p         | 1 |

|                    |                                                                  |   |
|--------------------|------------------------------------------------------------------|---|
| <i>circPLEKHM3</i> | miR-500a-3p                                                      | 2 |
| <i>circPLEKHM3</i> | miR-500b-3p                                                      | 2 |
| <i>circPLEKHM3</i> | miR-5010-3p                                                      | 2 |
| <i>circPLEKHM3</i> | miR-504-3p                                                       | 1 |
| <i>circPLEKHM3</i> | miR-505-3p.2                                                     | 1 |
| <i>circPLEKHM3</i> | miR-508-5p                                                       | 1 |
| <i>circPLEKHM3</i> | miR-5089-5p                                                      | 2 |
| <i>circPLEKHM3</i> | miR-509-3-5p/509-5p/4418                                         | 2 |
| <i>circPLEKHM3</i> | miR-5091                                                         | 1 |
| <i>circPLEKHM3</i> | miR-5095/7151-3p                                                 | 2 |
| <i>circPLEKHM3</i> | miR-5096                                                         | 3 |
| <i>circPLEKHM3</i> | miR-512-3p                                                       | 1 |
| <i>circPLEKHM3</i> | miR-513a-3p/513c-3p/3606-3p                                      | 1 |
| <i>circPLEKHM3</i> | miR-514a-3p                                                      | 1 |
| <i>circPLEKHM3</i> | miR-5187-3p                                                      | 2 |
| <i>circPLEKHM3</i> | miR-518a-5p/527                                                  | 1 |
| <i>circPLEKHM3</i> | miR-518d-5p/519-5p                                               | 1 |
| <i>circPLEKHM3</i> | miR-5192                                                         | 2 |
| <i>circPLEKHM3</i> | miR-5193                                                         | 3 |
| <i>circPLEKHM3</i> | miR-5195-5p                                                      | 1 |
| <i>circPLEKHM3</i> | miR-5196-3p                                                      | 2 |
| <i>circPLEKHM3</i> | miR-5197-3p                                                      | 2 |
| <i>circPLEKHM3</i> | miR-5197-5p                                                      | 1 |
| <i>circPLEKHM3</i> | miR-520g-5p                                                      | 2 |
| <i>circPLEKHM3</i> | miR-532-3p                                                       | 1 |
| <i>circPLEKHM3</i> | miR-541-5p                                                       | 1 |
| <i>circPLEKHM3</i> | miR-543                                                          | 1 |
| <i>circPLEKHM3</i> | miR-545-3p                                                       | 1 |
| <i>circPLEKHM3</i> | miR-548ac/548bb-3p/548d-3p/548h-3p/548z                          |   |
| <i>circPLEKHM3</i> | miR-548ai/548ag/548ba/570-5p                                     | 1 |
| <i>circPLEKHM3</i> | miR-548ap-3p/548aa/548t-3p                                       | 6 |
| <i>circPLEKHM3</i> | miR-548aq-3p/548am-3p/548aj-3p/548ah-3p/548ae-3p/548j-3p/548x-3p |   |
| <i>circPLEKHM3</i> | miR-548as-3p                                                     | 6 |
| <i>circPLEKHM3</i> | miR-548av-3p                                                     | 1 |
| <i>circPLEKHM3</i> | miR-548aw                                                        | 1 |
| <i>circPLEKHM3</i> | miR-548ay-3p/548at-3p                                            | 6 |
| <i>circPLEKHM3</i> | miR-548az-3p/548ar-3p/548a-3p/548e-3p/548f-3p                    |   |
| <i>circPLEKHM3</i> | miR-548az-5p/548t-5p                                             | 1 |

|                    |                    |   |
|--------------------|--------------------|---|
| <i>circPLEKHM3</i> | miR-548n           | 1 |
| <i>circPLEKHM3</i> | miR-548q           | 1 |
| <i>circPLEKHM3</i> | miR-548s           | 2 |
| <i>circPLEKHM3</i> | miR-551-3p         | 1 |
| <i>circPLEKHM3</i> | miR-552-5p         | 1 |
| <i>circPLEKHM3</i> | miR-556-3p         | 1 |
| <i>circPLEKHM3</i> | miR-5571-3p        | 1 |
| <i>circPLEKHM3</i> | miR-558            | 4 |
| <i>circPLEKHM3</i> | miR-5580-5p        | 1 |
| <i>circPLEKHM3</i> | miR-5582-3p        | 1 |
| <i>circPLEKHM3</i> | miR-5582-5p        | 1 |
| <i>circPLEKHM3</i> | miR-5584-5p        | 1 |
| <i>circPLEKHM3</i> | miR-5586-3p        | 1 |
| <i>circPLEKHM3</i> | miR-5586-5p        | 1 |
| <i>circPLEKHM3</i> | miR-5589-5p        | 2 |
| <i>circPLEKHM3</i> | miR-5699-5p        | 2 |
| <i>circPLEKHM3</i> | miR-5700           | 1 |
| <i>circPLEKHM3</i> | miR-5739           | 1 |
| <i>circPLEKHM3</i> | miR-575/4676-5p    | 2 |
| <i>circPLEKHM3</i> | miR-577            | 1 |
| <i>circPLEKHM3</i> | miR-578            | 1 |
| <i>circPLEKHM3</i> | miR-580-5p         | 1 |
| <i>circPLEKHM3</i> | miR-587            | 1 |
| <i>circPLEKHM3</i> | miR-588            | 2 |
| <i>circPLEKHM3</i> | miR-589-3p         | 1 |
| <i>circPLEKHM3</i> | miR-592            | 1 |
| <i>circPLEKHM3</i> | miR-593-5p         | 1 |
| <i>circPLEKHM3</i> | miR-597-5p         | 1 |
| <i>circPLEKHM3</i> | miR-599            | 1 |
| <i>circPLEKHM3</i> | miR-605-3p         | 2 |
| <i>circPLEKHM3</i> | miR-6077           | 2 |
| <i>circPLEKHM3</i> | miR-6079           | 2 |
| <i>circPLEKHM3</i> | miR-608/4651       | 1 |
| <i>circPLEKHM3</i> | miR-6131           | 1 |
| <i>circPLEKHM3</i> | miR-6134           | 2 |
| <i>circPLEKHM3</i> | miR-616-3p         | 2 |
| <i>circPLEKHM3</i> | miR-619-5p/6506-5p | 2 |
| <i>circPLEKHM3</i> | miR-622            | 1 |

|                    |                             |   |
|--------------------|-----------------------------|---|
| <i>circPLEKHM3</i> | miR-624-3p                  | 2 |
| <i>circPLEKHM3</i> | miR-626/6876-3p             | 2 |
| <i>circPLEKHM3</i> | miR-628-5p                  | 2 |
| <i>circPLEKHM3</i> | miR-629-3p                  | 1 |
| <i>circPLEKHM3</i> | miR-629-5p                  | 1 |
| <i>circPLEKHM3</i> | miR-633                     | 1 |
| <i>circPLEKHM3</i> | miR-635/6774-5p             | 2 |
| <i>circPLEKHM3</i> | miR-637                     | 2 |
| <i>circPLEKHM3</i> | miR-640                     | 1 |
| <i>circPLEKHM3</i> | miR-6501-3p                 | 4 |
| <i>circPLEKHM3</i> | miR-6503-3p                 | 1 |
| <i>circPLEKHM3</i> | miR-6504-3p                 | 3 |
| <i>circPLEKHM3</i> | miR-6507-3p                 | 1 |
| <i>circPLEKHM3</i> | miR-6507-5p                 | 1 |
| <i>circPLEKHM3</i> | miR-651-3p                  | 1 |
| <i>circPLEKHM3</i> | miR-6513-5p                 | 2 |
| <i>circPLEKHM3</i> | miR-6514-5p                 | 2 |
| <i>circPLEKHM3</i> | miR-6516-3p                 | 1 |
| <i>circPLEKHM3</i> | miR-652-3p                  | 1 |
| <i>circPLEKHM3</i> | miR-653-3p                  | 2 |
| <i>circPLEKHM3</i> | miR-660-3p                  | 3 |
| <i>circPLEKHM3</i> | miR-660-5p                  | 1 |
| <i>circPLEKHM3</i> | miR-663b                    | 1 |
| <i>circPLEKHM3</i> | miR-664a-5p/4794            | 2 |
| <i>circPLEKHM3</i> | miR-6715b-3p                | 2 |
| <i>circPLEKHM3</i> | miR-6720-5p                 | 1 |
| <i>circPLEKHM3</i> | miR-6728-3p                 | 1 |
| <i>circPLEKHM3</i> | miR-6728-5p                 | 2 |
| <i>circPLEKHM3</i> | miR-6731-3p                 | 1 |
| <i>circPLEKHM3</i> | miR-6731-5p/8085            | 1 |
| <i>circPLEKHM3</i> | miR-6735-3p                 | 1 |
| <i>circPLEKHM3</i> | miR-6736-3p                 | 2 |
| <i>circPLEKHM3</i> | miR-6737-5p/6812-5p/6819-5p | 1 |
| <i>circPLEKHM3</i> | miR-6742-3p                 | 1 |
| <i>circPLEKHM3</i> | miR-6747-3p                 | 1 |
| <i>circPLEKHM3</i> | miR-6747-5p                 | 1 |
| <i>circPLEKHM3</i> | miR-6748-3p                 | 2 |
| <i>circPLEKHM3</i> | miR-6749-3p                 | 2 |

|                    |                     |   |
|--------------------|---------------------|---|
| <i>circPLEKHM3</i> | miR-6750-5p/6822-5p | 1 |
| <i>circPLEKHM3</i> | miR-6752-3p         | 1 |
| <i>circPLEKHM3</i> | miR-6757-5p         | 1 |
| <i>circPLEKHM3</i> | miR-676-3p          | 4 |
| <i>circPLEKHM3</i> | miR-6765-3p         | 1 |
| <i>circPLEKHM3</i> | miR-6767-3p         | 1 |
| <i>circPLEKHM3</i> | miR-6769a-3p        | 1 |
| <i>circPLEKHM3</i> | miR-6776-5p         | 2 |
| <i>circPLEKHM3</i> | miR-6778-3p         | 4 |
| <i>circPLEKHM3</i> | miR-6780a-3p        | 1 |
| <i>circPLEKHM3</i> | miR-6782-5p         | 1 |
| <i>circPLEKHM3</i> | miR-6787-3p         | 2 |
| <i>circPLEKHM3</i> | miR-6790-3p         | 1 |
| <i>circPLEKHM3</i> | miR-6791-3p/6829-3p | 4 |
| <i>circPLEKHM3</i> | miR-6794-3p         | 1 |
| <i>circPLEKHM3</i> | miR-6800-3p         | 2 |
| <i>circPLEKHM3</i> | miR-6801-3p/6810-3p | 2 |
| <i>circPLEKHM3</i> | miR-6807-5p         | 1 |
| <i>circPLEKHM3</i> | miR-6809-5p         | 2 |
| <i>circPLEKHM3</i> | miR-6817-3p         | 2 |
| <i>circPLEKHM3</i> | miR-6818-3p         | 1 |
| <i>circPLEKHM3</i> | miR-6819-3p/6877-3p | 2 |
| <i>circPLEKHM3</i> | miR-6821-3p         | 1 |
| <i>circPLEKHM3</i> | miR-6826-3p         | 2 |
| <i>circPLEKHM3</i> | miR-6830-3p         | 2 |
| <i>circPLEKHM3</i> | miR-6830-5p         | 2 |
| <i>circPLEKHM3</i> | miR-6832-3p         | 2 |
| <i>circPLEKHM3</i> | miR-6832-5p         | 1 |
| <i>circPLEKHM3</i> | miR-6833-5p         | 1 |
| <i>circPLEKHM3</i> | miR-6836-3p         | 1 |
| <i>circPLEKHM3</i> | miR-6839-3p         | 2 |
| <i>circPLEKHM3</i> | miR-6840-5p         | 1 |
| <i>circPLEKHM3</i> | miR-6844            | 2 |
| <i>circPLEKHM3</i> | miR-6846-3p         | 1 |
| <i>circPLEKHM3</i> | miR-6849-3p         | 2 |
| <i>circPLEKHM3</i> | miR-6852-5p         | 1 |
| <i>circPLEKHM3</i> | miR-6853-3p         | 1 |
| <i>circPLEKHM3</i> | miR-6854-5p         | 1 |

|                    |             |   |
|--------------------|-------------|---|
| <i>circPLEKHM3</i> | miR-6856-3p | 1 |
| <i>circPLEKHM3</i> | miR-6857-3p | 1 |
| <i>circPLEKHM3</i> | miR-6858-3p | 2 |
| <i>circPLEKHM3</i> | miR-6859-3p | 1 |
| <i>circPLEKHM3</i> | miR-6861-5p | 2 |
| <i>circPLEKHM3</i> | miR-6866-5p | 3 |
| <i>circPLEKHM3</i> | miR-6867-5p | 2 |
| <i>circPLEKHM3</i> | miR-6868-5p | 3 |
| <i>circPLEKHM3</i> | miR-6872-3p | 1 |
| <i>circPLEKHM3</i> | miR-6873-5p | 2 |
| <i>circPLEKHM3</i> | miR-6874-5p | 1 |
| <i>circPLEKHM3</i> | miR-6878-3p | 1 |
| <i>circPLEKHM3</i> | miR-6878-5p | 1 |
| <i>circPLEKHM3</i> | miR-6881-3p | 1 |
| <i>circPLEKHM3</i> | miR-6884-3p | 2 |
| <i>circPLEKHM3</i> | miR-6885-3p | 1 |
| <i>circPLEKHM3</i> | miR-6888-3p | 1 |
| <i>circPLEKHM3</i> | miR-6890-3p | 2 |
| <i>circPLEKHM3</i> | miR-7-5p    | 2 |
| <i>circPLEKHM3</i> | miR-708-3p  | 1 |
| <i>circPLEKHM3</i> | miR-7108-3p | 1 |
| <i>circPLEKHM3</i> | miR-7108-5p | 2 |
| <i>circPLEKHM3</i> | miR-7109-3p | 1 |
| <i>circPLEKHM3</i> | miR-7110-3p | 2 |
| <i>circPLEKHM3</i> | miR-7111-3p | 1 |
| <i>circPLEKHM3</i> | miR-7113-5p | 2 |
| <i>circPLEKHM3</i> | miR-7114-5p | 1 |
| <i>circPLEKHM3</i> | miR-7150    | 1 |
| <i>circPLEKHM3</i> | miR-7151-5p | 1 |
| <i>circPLEKHM3</i> | miR-7153-3p | 3 |
| <i>circPLEKHM3</i> | miR-7155-5p | 2 |
| <i>circPLEKHM3</i> | miR-7159-5p | 1 |
| <i>circPLEKHM3</i> | miR-7160-5p | 4 |
| <i>circPLEKHM3</i> | miR-7162-3p | 2 |
| <i>circPLEKHM3</i> | miR-7515    | 1 |
| <i>circPLEKHM3</i> | miR-759     | 3 |
| <i>circPLEKHM3</i> | miR-766-3p  | 1 |
| <i>circPLEKHM3</i> | miR-767-5p  | 1 |

|                    |                                       |   |
|--------------------|---------------------------------------|---|
| <i>circPLEKHM3</i> | miR-769-5p                            | 2 |
| <i>circPLEKHM3</i> | miR-770-5p                            | 1 |
| <i>circPLEKHM3</i> | miR-7702                              | 1 |
| <i>circPLEKHM3</i> | miR-7847-3p                           | 1 |
| <i>circPLEKHM3</i> | miR-7848-3p                           | 1 |
| <i>circPLEKHM3</i> | miR-7850-5p                           | 4 |
| <i>circPLEKHM3</i> | miR-7854-3p                           | 2 |
| <i>circPLEKHM3</i> | miR-7975                              | 1 |
| <i>circPLEKHM3</i> | miR-7977                              | 1 |
| <i>circPLEKHM3</i> | miR-7978                              | 1 |
| <i>circPLEKHM3</i> | miR-8055                              | 1 |
| <i>circPLEKHM3</i> | miR-8057                              | 1 |
| <i>circPLEKHM3</i> | miR-8077                              | 4 |
| <i>circPLEKHM3</i> | miR-8078                              | 1 |
| <i>circPLEKHM3</i> | miR-8083                              | 2 |
| <i>circPLEKHM3</i> | miR-873-3p                            | 2 |
| <i>circPLEKHM3</i> | miR-875-5p                            | 1 |
| <i>circPLEKHM3</i> | miR-876-5p                            | 1 |
| <i>circPLEKHM3</i> | miR-877-5p                            | 3 |
| <i>circPLEKHM3</i> | miR-887-5p                            | 2 |
| <i>circPLEKHM3</i> | miR-9-3p                              | 2 |
| <i>circPLEKHM3</i> | miR-9-5p                              | 6 |
| <i>circPLEKHM3</i> | miR-924                               | 1 |
| <i>circPLEKHM3</i> | miR-935                               | 1 |
| <i>circPLEKHM3</i> | miR-939-3p                            | 1 |
| <i>circPLEKHM3</i> | miR-944                               | 1 |
| <i>circPLEKHM3</i> | miR-95-5p                             | 1 |
| <i>circPLEKHM3</i> | miR-9500                              | 1 |
| <i>circPLEKHM3</i> | miR-96-3p                             | 2 |
| <i>circPLEKHM3</i> | let-7a-3p/let-7b-3p/let-7f-1-3p/98-3p | 2 |
| <i>circPLEKHM3</i> | let-7f-2-3p/1185-3p                   | 2 |
| <i>circPLEKHM3</i> | miR-1-3p/206                          | 2 |
| <i>circPLEKHM3</i> | miR-100-3p                            | 2 |
| <i>circPLEKHM3</i> | miR-101-3p.1                          | 2 |
| <i>circPLEKHM3</i> | miR-105-5p                            | 3 |
| <i>circPLEKHM3</i> | miR-1178-3p                           | 2 |
| <i>circPLEKHM3</i> | miR-1179                              | 2 |
| <i>circPLEKHM3</i> | miR-1199-5p/6751-3p                   | 4 |



|                    |                          |   |
|--------------------|--------------------------|---|
| <i>circPLEKHM3</i> | miR-1208                 | 2 |
| <i>circPLEKHM3</i> | miR-1226-3p              | 2 |
| <i>circPLEKHM3</i> | miR-1227-5p              | 2 |
| <i>circPLEKHM3</i> | miR-1229-3p              | 2 |
| <i>circPLEKHM3</i> | miR-1231                 | 2 |
| <i>circPLEKHM3</i> | miR-1233-5p/6778-5p      | 1 |
| <i>circPLEKHM3</i> | miR-124-3p.1             | 4 |
| <i>circPLEKHM3</i> | miR-124-5p               | 2 |
| <i>circPLEKHM3</i> | miR-1243                 | 2 |
| <i>circPLEKHM3</i> | miR-1244                 | 2 |
| <i>circPLEKHM3</i> | miR-1245b-3p             | 2 |
| <i>circPLEKHM3</i> | miR-1246                 | 2 |
| <i>circPLEKHM3</i> | miR-1254/3116            | 2 |
| <i>circPLEKHM3</i> | miR-1256                 | 2 |
| <i>circPLEKHM3</i> | miR-126-3p.1             | 2 |
| <i>circPLEKHM3</i> | miR-1261                 | 2 |
| <i>circPLEKHM3</i> | miR-1262/4701-3p/6736-5p | 2 |
| <i>circPLEKHM3</i> | miR-1265                 | 4 |
| <i>circPLEKHM3</i> | miR-1267                 | 2 |
| <i>circPLEKHM3</i> | miR-1269                 | 2 |
| <i>circPLEKHM3</i> | miR-1272                 | 2 |
| <i>circPLEKHM3</i> | miR-1273d                | 2 |
| <i>circPLEKHM3</i> | miR-1285-5p              | 2 |
| <i>circPLEKHM3</i> | miR-1288-3p              | 2 |
| <i>circPLEKHM3</i> | miR-1293/4483            | 2 |
| <i>circPLEKHM3</i> | miR-1296-3p              | 3 |
| <i>circPLEKHM3</i> | miR-130-3p/301-3p/454-3p | 2 |
| <i>circPLEKHM3</i> | miR-1305                 | 3 |
| <i>circPLEKHM3</i> | miR-1306-3p              | 2 |
| <i>circPLEKHM3</i> | miR-132-3p/212-3p        | 2 |
| <i>circPLEKHM3</i> | miR-1322                 | 2 |
| <i>circPLEKHM3</i> | miR-1324                 | 1 |
| <i>circPLEKHM3</i> | miR-134-5p               | 2 |
| <i>circPLEKHM3</i> | miR-135-5p               | 4 |
| <i>circPLEKHM3</i> | miR-139-3p               | 1 |
| <i>circPLEKHM3</i> | miR-139-5p               | 5 |
| <i>circPLEKHM3</i> | miR-141-3p/200-3p        | 2 |
| <i>circPLEKHM3</i> | miR-142-3p.1             | 2 |

|                    |                                    |   |
|--------------------|------------------------------------|---|
| <i>circPLEKHM3</i> | miR-144-3p                         | 2 |
| <i>circPLEKHM3</i> | miR-145-3p                         | 2 |
| <i>circPLEKHM3</i> | miR-1468-3p                        | 2 |
| <i>circPLEKHM3</i> | miR-149-3p/4728-5p/6785-5p/6883-5p | 2 |
| <i>circPLEKHM3</i> | miR-151-5p                         | 6 |
| <i>circPLEKHM3</i> | miR-153-5p                         | 2 |
| <i>circPLEKHM3</i> | miR-154-3p/487-3p                  | 2 |
| <i>circPLEKHM3</i> | miR-1587/3620-5p                   | 2 |
| <i>circPLEKHM3</i> | miR-15a-3p                         | 2 |
| <i>circPLEKHM3</i> | miR-15b-3p                         | 4 |
| <i>circPLEKHM3</i> | miR-181-5p                         | 2 |
| <i>circPLEKHM3</i> | miR-181d-3p                        | 2 |
| <i>circPLEKHM3</i> | miR-1825                           | 2 |
| <i>circPLEKHM3</i> | miR-19-5p                          | 2 |
| <i>circPLEKHM3</i> | miR-1909-3p/6722-3p                | 2 |
| <i>circPLEKHM3</i> | miR-1910-3p/6511a-5p               | 2 |
| <i>circPLEKHM3</i> | miR-1915-3p/6764-5p                | 2 |
| <i>circPLEKHM3</i> | miR-192-3p                         | 2 |
| <i>circPLEKHM3</i> | miR-193-3p                         | 1 |
| <i>circPLEKHM3</i> | miR-194-3p                         | 3 |
| <i>circPLEKHM3</i> | miR-196a-3p                        | 2 |
| <i>circPLEKHM3</i> | miR-196b-3p                        | 3 |
| <i>circPLEKHM3</i> | miR-198                            | 2 |
| <i>circPLEKHM3</i> | miR-199-5p                         | 2 |
| <i>circPLEKHM3</i> | miR-203b-3p                        | 2 |
| <i>circPLEKHM3</i> | miR-2052                           | 2 |
| <i>circPLEKHM3</i> | miR-208-5p                         | 4 |
| <i>circPLEKHM3</i> | miR-2110                           | 2 |
| <i>circPLEKHM3</i> | miR-2115-5p                        | 2 |
| <i>circPLEKHM3</i> | miR-214-3p/3619-5p                 | 1 |
| <i>circPLEKHM3</i> | miR-216a-5p                        | 2 |
| <i>circPLEKHM3</i> | miR-216b-5p                        | 2 |
| <i>circPLEKHM3</i> | miR-218-5p                         | 2 |
| <i>circPLEKHM3</i> | miR-219b-5p                        | 2 |
| <i>circPLEKHM3</i> | miR-221-3p/222-3p                  | 4 |
| <i>circPLEKHM3</i> | miR-221-5p/8073                    | 2 |
| <i>circPLEKHM3</i> | miR-224-5p                         | 4 |
| <i>circPLEKHM3</i> | miR-2277-3p                        | 3 |

|                    |                     |   |
|--------------------|---------------------|---|
| <i>circPLEKHM3</i> | miR-2278            | 4 |
| <i>circPLEKHM3</i> | miR-2392            | 4 |
| <i>circPLEKHM3</i> | miR-24-3p           | 2 |
| <i>circPLEKHM3</i> | miR-26-5p           | 2 |
| <i>circPLEKHM3</i> | miR-27a-5p          | 4 |
| <i>circPLEKHM3</i> | miR-296-3p          | 1 |
| <i>circPLEKHM3</i> | miR-297             | 2 |
| <i>circPLEKHM3</i> | miR-30-3p           | 2 |
| <i>circPLEKHM3</i> | miR-301a-5p/301b-5p | 2 |
| <i>circPLEKHM3</i> | miR-3064-5p         | 2 |
| <i>circPLEKHM3</i> | miR-3074-5p         | 2 |
| <i>circPLEKHM3</i> | miR-3119            | 4 |
| <i>circPLEKHM3</i> | miR-3120-3p         | 1 |
| <i>circPLEKHM3</i> | miR-3127-5p         | 2 |
| <i>circPLEKHM3</i> | miR-3134            | 4 |
| <i>circPLEKHM3</i> | miR-3136-5p/4439    | 2 |
| <i>circPLEKHM3</i> | miR-3138            | 2 |
| <i>circPLEKHM3</i> | miR-3140-3p         | 2 |
| <i>circPLEKHM3</i> | miR-3144-5p         | 2 |
| <i>circPLEKHM3</i> | miR-3149            | 2 |
| <i>circPLEKHM3</i> | miR-3150a-3p        | 2 |
| <i>circPLEKHM3</i> | miR-3158-3p         | 6 |
| <i>circPLEKHM3</i> | miR-3160-5p         | 4 |
| <i>circPLEKHM3</i> | miR-3164            | 2 |
| <i>circPLEKHM3</i> | miR-3165            | 2 |
| <i>circPLEKHM3</i> | miR-3166            | 1 |
| <i>circPLEKHM3</i> | miR-3180-3p         | 2 |
| <i>circPLEKHM3</i> | miR-3180-5p         | 4 |
| <i>circPLEKHM3</i> | miR-3191-3p         | 2 |
| <i>circPLEKHM3</i> | miR-3194-3p         | 2 |
| <i>circPLEKHM3</i> | miR-3199/8052       | 2 |
| <i>circPLEKHM3</i> | miR-3202            | 2 |
| <i>circPLEKHM3</i> | miR-330-3p          | 1 |
| <i>circPLEKHM3</i> | miR-335-3p          | 2 |
| <i>circPLEKHM3</i> | miR-339-5p          | 2 |
| <i>circPLEKHM3</i> | miR-345-5p          | 4 |
| <i>circPLEKHM3</i> | miR-34b-5p/449c-5p  | 2 |
| <i>circPLEKHM3</i> | miR-3529-3p         | 2 |

|                    |                     |   |
|--------------------|---------------------|---|
| <i>circPLEKHM3</i> | miR-361-3p          | 2 |
| <i>circPLEKHM3</i> | miR-3616-3p         | 2 |
| <i>circPLEKHM3</i> | miR-3619-3p         | 1 |
| <i>circPLEKHM3</i> | miR-3620-3p         | 2 |
| <i>circPLEKHM3</i> | miR-3622b-5p        | 2 |
| <i>circPLEKHM3</i> | miR-363-5p/6745     | 2 |
| <i>circPLEKHM3</i> | miR-3654            | 2 |
| <i>circPLEKHM3</i> | miR-365a-5p/365b-5p | 2 |
| <i>circPLEKHM3</i> | miR-3660/4526       | 2 |
| <i>circPLEKHM3</i> | miR-367-5p          | 2 |
| <i>circPLEKHM3</i> | miR-3671            | 5 |
| <i>circPLEKHM3</i> | miR-3672/6864-3p    | 2 |
| <i>circPLEKHM3</i> | miR-3675-5p         | 2 |
| <i>circPLEKHM3</i> | miR-3679-3p         | 2 |
| <i>circPLEKHM3</i> | miR-3680-5p         | 2 |
| <i>circPLEKHM3</i> | miR-3682-5p         | 1 |
| <i>circPLEKHM3</i> | miR-3690            | 7 |
| <i>circPLEKHM3</i> | miR-3691-5p         | 2 |
| <i>circPLEKHM3</i> | miR-3692-5p         | 4 |
| <i>circPLEKHM3</i> | miR-3714            | 4 |
| <i>circPLEKHM3</i> | miR-376-3p          | 2 |
| <i>circPLEKHM3</i> | miR-376b-5p/376c-5p | 2 |
| <i>circPLEKHM3</i> | miR-378-3p          | 2 |
| <i>circPLEKHM3</i> | miR-378j/6839-5p    | 2 |
| <i>circPLEKHM3</i> | miR-381-5p          | 2 |
| <i>circPLEKHM3</i> | miR-3910            | 4 |
| <i>circPLEKHM3</i> | miR-3912-5p         | 4 |
| <i>circPLEKHM3</i> | miR-3914            | 2 |
| <i>circPLEKHM3</i> | miR-3918            | 4 |
| <i>circPLEKHM3</i> | miR-3921/4653-5p    | 2 |
| <i>circPLEKHM3</i> | miR-3928-3p         | 2 |
| <i>circPLEKHM3</i> | miR-3928-5p/6806-3p | 2 |
| <i>circPLEKHM3</i> | miR-3934-3p         | 4 |
| <i>circPLEKHM3</i> | miR-3938            | 1 |
| <i>circPLEKHM3</i> | miR-3941            | 2 |
| <i>circPLEKHM3</i> | miR-3942-3p         | 2 |
| <i>circPLEKHM3</i> | miR-3945            | 2 |
| <i>circPLEKHM3</i> | miR-409-5p          | 3 |

|                    |                   |   |
|--------------------|-------------------|---|
| <i>circPLEKHM3</i> | miR-4251          | 2 |
| <i>circPLEKHM3</i> | miR-4253/6862-5p  | 2 |
| <i>circPLEKHM3</i> | miR-4254          | 7 |
| <i>circPLEKHM3</i> | miR-4257          | 2 |
| <i>circPLEKHM3</i> | miR-4263          | 1 |
| <i>circPLEKHM3</i> | miR-4267          | 4 |
| <i>circPLEKHM3</i> | miR-4274          | 1 |
| <i>circPLEKHM3</i> | miR-4284          | 2 |
| <i>circPLEKHM3</i> | miR-4293          | 2 |
| <i>circPLEKHM3</i> | miR-4305          | 2 |
| <i>circPLEKHM3</i> | miR-432-3p        | 4 |
| <i>circPLEKHM3</i> | miR-4324          | 2 |
| <i>circPLEKHM3</i> | miR-4329          | 2 |
| <i>circPLEKHM3</i> | miR-433-3p        | 2 |
| <i>circPLEKHM3</i> | miR-4330          | 2 |
| <i>circPLEKHM3</i> | miR-4417          | 4 |
| <i>circPLEKHM3</i> | miR-4423-3p       | 2 |
| <i>circPLEKHM3</i> | miR-4431          | 2 |
| <i>circPLEKHM3</i> | miR-4433b-3p      | 2 |
| <i>circPLEKHM3</i> | miR-4436b-5p      | 2 |
| <i>circPLEKHM3</i> | miR-4437          | 2 |
| <i>circPLEKHM3</i> | miR-4443          | 4 |
| <i>circPLEKHM3</i> | miR-4446-3p       | 6 |
| <i>circPLEKHM3</i> | miR-4446-5p       | 2 |
| <i>circPLEKHM3</i> | miR-4457          | 1 |
| <i>circPLEKHM3</i> | miR-4467          | 2 |
| <i>circPLEKHM3</i> | miR-4468          | 2 |
| <i>circPLEKHM3</i> | miR-4470          | 1 |
| <i>circPLEKHM3</i> | miR-4473          | 2 |
| <i>circPLEKHM3</i> | miR-4476/6876-5p  | 2 |
| <i>circPLEKHM3</i> | miR-4484          | 2 |
| <i>circPLEKHM3</i> | miR-4506          | 2 |
| <i>circPLEKHM3</i> | miR-4511          | 2 |
| <i>circPLEKHM3</i> | miR-4515          | 2 |
| <i>circPLEKHM3</i> | miR-4519          | 1 |
| <i>circPLEKHM3</i> | miR-452-5p/892-3p | 4 |
| <i>circPLEKHM3</i> | miR-4520-2-3p     | 2 |
| <i>circPLEKHM3</i> | miR-4520-3p       | 4 |

|                    |                  |   |
|--------------------|------------------|---|
| <i>circPLEKHM3</i> | miR-4522         | 4 |
| <i>circPLEKHM3</i> | miR-4529-3p      | 2 |
| <i>circPLEKHM3</i> | miR-4529-5p      | 2 |
| <i>circPLEKHM3</i> | miR-4533         | 2 |
| <i>circPLEKHM3</i> | miR-4534/8082    | 4 |
| <i>circPLEKHM3</i> | miR-455-5p       | 1 |
| <i>circPLEKHM3</i> | miR-4633-5p      | 2 |
| <i>circPLEKHM3</i> | miR-4638-3p      | 2 |
| <i>circPLEKHM3</i> | miR-4645-3p      | 1 |
| <i>circPLEKHM3</i> | miR-4648         | 1 |
| <i>circPLEKHM3</i> | miR-4652-5p      | 2 |
| <i>circPLEKHM3</i> | miR-4654/4769-5p | 1 |
| <i>circPLEKHM3</i> | miR-4656         | 2 |
| <i>circPLEKHM3</i> | miR-4661-3p      | 4 |
| <i>circPLEKHM3</i> | miR-4662a-3p     | 2 |
| <i>circPLEKHM3</i> | miR-4666a-5p     | 2 |
| <i>circPLEKHM3</i> | miR-4666b        | 2 |
| <i>circPLEKHM3</i> | miR-4671-3p      | 2 |
| <i>circPLEKHM3</i> | miR-4672         | 2 |
| <i>circPLEKHM3</i> | miR-4674         | 2 |
| <i>circPLEKHM3</i> | miR-4675/4741    | 2 |
| <i>circPLEKHM3</i> | miR-4680-5p      | 2 |
| <i>circPLEKHM3</i> | miR-4683         | 1 |
| <i>circPLEKHM3</i> | miR-4684-5p      | 2 |
| <i>circPLEKHM3</i> | miR-4687-3p      | 2 |
| <i>circPLEKHM3</i> | miR-4690-5p      | 2 |
| <i>circPLEKHM3</i> | miR-4693-5p      | 2 |
| <i>circPLEKHM3</i> | miR-4694-3p      | 2 |
| <i>circPLEKHM3</i> | miR-4699-3p      | 2 |
| <i>circPLEKHM3</i> | miR-4699-5p      | 2 |
| <i>circPLEKHM3</i> | miR-4709-3p      | 2 |
| <i>circPLEKHM3</i> | miR-4711-3p      | 2 |
| <i>circPLEKHM3</i> | miR-4721         | 2 |
| <i>circPLEKHM3</i> | miR-4724-3p      | 2 |
| <i>circPLEKHM3</i> | miR-4726-3p      | 2 |
| <i>circPLEKHM3</i> | miR-4729         | 2 |
| <i>circPLEKHM3</i> | miR-4733-3p      | 2 |
| <i>circPLEKHM3</i> | miR-4740-5p      | 2 |

|                    |                                      |   |
|--------------------|--------------------------------------|---|
| <i>circPLEKHM3</i> | miR-4747-5p/5196-5p                  | 2 |
| <i>circPLEKHM3</i> | miR-4762-5p                          | 2 |
| <i>circPLEKHM3</i> | miR-4764-5p                          | 2 |
| <i>circPLEKHM3</i> | miR-4769-3p/6817-5p                  | 4 |
| <i>circPLEKHM3</i> | miR-4771                             | 1 |
| <i>circPLEKHM3</i> | miR-4783-3p                          | 2 |
| <i>circPLEKHM3</i> | miR-4789-5p                          | 2 |
| <i>circPLEKHM3</i> | miR-4790-3p                          | 2 |
| <i>circPLEKHM3</i> | miR-4797-5p                          | 2 |
| <i>circPLEKHM3</i> | miR-4798-3p                          | 2 |
| <i>circPLEKHM3</i> | miR-4799-5p                          | 1 |
| <i>circPLEKHM3</i> | miR-4800-5p                          | 2 |
| <i>circPLEKHM3</i> | miR-490-3p                           | 6 |
| <i>circPLEKHM3</i> | miR-491-3p                           | 3 |
| <i>circPLEKHM3</i> | miR-495-3p                           | 4 |
| <i>circPLEKHM3</i> | miR-497-3p                           | 2 |
| <i>circPLEKHM3</i> | miR-5000-5p                          | 2 |
| <i>circPLEKHM3</i> | miR-5008-3p/6737-3p/7157-3p          | 2 |
| <i>circPLEKHM3</i> | miR-5008-5p                          | 2 |
| <i>circPLEKHM3</i> | miR-5009-5p/8058                     | 2 |
| <i>circPLEKHM3</i> | miR-5011-3p                          | 2 |
| <i>circPLEKHM3</i> | miR-5088-5p                          | 6 |
| <i>circPLEKHM3</i> | miR-5092                             | 2 |
| <i>circPLEKHM3</i> | miR-511-5p                           | 2 |
| <i>circPLEKHM3</i> | miR-512-5p                           | 4 |
| <i>circPLEKHM3</i> | miR-516a-3p/516b-3p/7162-5p          | 2 |
| <i>circPLEKHM3</i> | miR-5186                             | 1 |
| <i>circPLEKHM3</i> | miR-519d-5p                          | 2 |
| <i>circPLEKHM3</i> | miR-522-3p                           | 2 |
| <i>circPLEKHM3</i> | miR-525-5p                           | 6 |
| <i>circPLEKHM3</i> | miR-544b                             | 2 |
| <i>circPLEKHM3</i> | miR-548aj-5p/548f-5p/548g-5p/548x-5p | 2 |
| <i>circPLEKHM3</i> | miR-548an                            | 2 |
| <i>circPLEKHM3</i> | miR-548ao-5p/548ax                   | 2 |
| <i>circPLEKHM3</i> | miR-548b-3p                          | 2 |
| <i>circPLEKHM3</i> | miR-548p                             | 2 |
| <i>circPLEKHM3</i> | miR-548v                             | 4 |
| <i>circPLEKHM3</i> | miR-549a                             | 4 |

|                    |                  |   |
|--------------------|------------------|---|
| <i>circPLEKHM3</i> | miR-550b-2-5p    | 2 |
| <i>circPLEKHM3</i> | miR-551b-5p      | 2 |
| <i>circPLEKHM3</i> | miR-556-5p       | 2 |
| <i>circPLEKHM3</i> | miR-5585-5p      | 2 |
| <i>circPLEKHM3</i> | miR-562          | 2 |
| <i>circPLEKHM3</i> | miR-5681a        | 1 |
| <i>circPLEKHM3</i> | miR-5690         | 4 |
| <i>circPLEKHM3</i> | miR-5693         | 3 |
| <i>circPLEKHM3</i> | miR-5695         | 2 |
| <i>circPLEKHM3</i> | miR-5696         | 2 |
| <i>circPLEKHM3</i> | miR-570-3p       | 2 |
| <i>circPLEKHM3</i> | miR-5702         | 2 |
| <i>circPLEKHM3</i> | miR-576-5p       | 1 |
| <i>circPLEKHM3</i> | miR-579-3p       | 2 |
| <i>circPLEKHM3</i> | miR-591          | 1 |
| <i>circPLEKHM3</i> | miR-596          | 2 |
| <i>circPLEKHM3</i> | miR-600          | 2 |
| <i>circPLEKHM3</i> | miR-604          | 4 |
| <i>circPLEKHM3</i> | miR-6068         | 2 |
| <i>circPLEKHM3</i> | miR-607          | 1 |
| <i>circPLEKHM3</i> | miR-6073         | 2 |
| <i>circPLEKHM3</i> | miR-6076/6797-3p | 2 |
| <i>circPLEKHM3</i> | miR-6089         | 2 |
| <i>circPLEKHM3</i> | miR-610          | 2 |
| <i>circPLEKHM3</i> | miR-611/3131     | 6 |
| <i>circPLEKHM3</i> | miR-6128         | 2 |
| <i>circPLEKHM3</i> | miR-6132/6836-5p | 2 |
| <i>circPLEKHM3</i> | miR-614          | 2 |
| <i>circPLEKHM3</i> | miR-615-3p       | 2 |
| <i>circPLEKHM3</i> | miR-6165         | 2 |
| <i>circPLEKHM3</i> | miR-619-3p       | 5 |
| <i>circPLEKHM3</i> | miR-624-5p       | 2 |
| <i>circPLEKHM3</i> | miR-625-3p       | 2 |
| <i>circPLEKHM3</i> | miR-627-3p       | 2 |
| <i>circPLEKHM3</i> | miR-632/4288     | 2 |
| <i>circPLEKHM3</i> | miR-634          | 4 |
| <i>circPLEKHM3</i> | miR-647          | 4 |
| <i>circPLEKHM3</i> | miR-649          | 6 |



|                    |                       |   |
|--------------------|-----------------------|---|
| <i>circPLEKHM3</i> | miR-6499-3p           | 1 |
| <i>circPLEKHM3</i> | miR-6509-3p           | 2 |
| <i>circPLEKHM3</i> | miR-6510-5p           | 2 |
| <i>circPLEKHM3</i> | miR-6511-3p           | 2 |
| <i>circPLEKHM3</i> | miR-6515-5p           | 4 |
| <i>circPLEKHM3</i> | miR-654-5p            | 2 |
| <i>circPLEKHM3</i> | miR-661               | 2 |
| <i>circPLEKHM3</i> | miR-671-3p            | 2 |
| <i>circPLEKHM3</i> | miR-6715a-3p          | 2 |
| <i>circPLEKHM3</i> | miR-6716-5p           | 1 |
| <i>circPLEKHM3</i> | miR-6719-3p           | 2 |
| <i>circPLEKHM3</i> | miR-6730-3p           | 2 |
| <i>circPLEKHM3</i> | miR-6730-5p           | 1 |
| <i>circPLEKHM3</i> | miR-6741-5p           | 2 |
| <i>circPLEKHM3</i> | miR-675-3p            | 2 |
| <i>circPLEKHM3</i> | miR-6750-3p           | 2 |
| <i>circPLEKHM3</i> | miR-6753-5p           | 2 |
| <i>circPLEKHM3</i> | miR-6756-5p/6766-5p   | 2 |
| <i>circPLEKHM3</i> | miR-6757-3p           | 2 |
| <i>circPLEKHM3</i> | miR-6760-3p           | 2 |
| <i>circPLEKHM3</i> | miR-6761-5p           | 2 |
| <i>circPLEKHM3</i> | miR-6762-3p           | 4 |
| <i>circPLEKHM3</i> | miR-6768-3p           | 2 |
| <i>circPLEKHM3</i> | miR-6768-5p           | 2 |
| <i>circPLEKHM3</i> | miR-6769a-5p/6769b-5p | 2 |
| <i>circPLEKHM3</i> | miR-6771-3p           | 2 |
| <i>circPLEKHM3</i> | miR-6782-3p           | 2 |
| <i>circPLEKHM3</i> | miR-6784-3p/6862-3p   | 2 |
| <i>circPLEKHM3</i> | miR-6799-5p           | 2 |
| <i>circPLEKHM3</i> | miR-6808-3p           | 2 |
| <i>circPLEKHM3</i> | miR-6810-5p           | 2 |
| <i>circPLEKHM3</i> | miR-6814-5p           | 2 |
| <i>circPLEKHM3</i> | miR-6816-3p           | 1 |
| <i>circPLEKHM3</i> | miR-6820-5p           | 2 |
| <i>circPLEKHM3</i> | miR-6822-3p           | 2 |
| <i>circPLEKHM3</i> | miR-6827-5p           | 3 |
| <i>circPLEKHM3</i> | miR-6829-5p           | 2 |
| <i>circPLEKHM3</i> | miR-6834-3p           | 2 |

|                    |                           |   |
|--------------------|---------------------------|---|
| <i>circPLEKHM3</i> | miR-6840-3p               | 2 |
| <i>circPLEKHM3</i> | miR-6842-3p               | 4 |
| <i>circPLEKHM3</i> | miR-6847-5p               | 2 |
| <i>circPLEKHM3</i> | miR-6857-5p               | 2 |
| <i>circPLEKHM3</i> | miR-6868-3p               | 2 |
| <i>circPLEKHM3</i> | miR-6871-5p               | 2 |
| <i>circPLEKHM3</i> | miR-6879-3p               | 2 |
| <i>circPLEKHM3</i> | miR-6880-5p               | 2 |
| <i>circPLEKHM3</i> | miR-6882-3p               | 4 |
| <i>circPLEKHM3</i> | miR-6889-3p               | 2 |
| <i>circPLEKHM3</i> | miR-6890-5p               | 2 |
| <i>circPLEKHM3</i> | miR-7106-5p               | 2 |
| <i>circPLEKHM3</i> | miR-7152-5p               | 2 |
| <i>circPLEKHM3</i> | miR-7154-5p               | 2 |
| <i>circPLEKHM3</i> | miR-7158-3p               | 2 |
| <i>circPLEKHM3</i> | miR-760                   | 2 |
| <i>circPLEKHM3</i> | miR-762/4492/4498/5001-5p | 2 |
| <i>circPLEKHM3</i> | miR-767-3p                | 2 |
| <i>circPLEKHM3</i> | miR-7705                  | 2 |
| <i>circPLEKHM3</i> | miR-7845-5p               | 2 |
| <i>circPLEKHM3</i> | miR-7851-3p               | 5 |
| <i>circPLEKHM3</i> | miR-7974                  | 2 |
| <i>circPLEKHM3</i> | miR-8056                  | 2 |
| <i>circPLEKHM3</i> | miR-8060                  | 2 |
| <i>circPLEKHM3</i> | miR-8066                  | 3 |
| <i>circPLEKHM3</i> | miR-8069                  | 2 |
| <i>circPLEKHM3</i> | miR-8071                  | 2 |
| <i>circPLEKHM3</i> | miR-8074                  | 2 |
| <i>circPLEKHM3</i> | miR-8080                  | 1 |
| <i>circPLEKHM3</i> | miR-873-5p.1              | 4 |
| <i>circPLEKHM3</i> | miR-889-5p                | 4 |
| <i>circPLEKHM3</i> | miR-922                   | 1 |
| <i>circPLEKHM3</i> | miR-92a-2-5p              | 2 |
| <i>circPLEKHM3</i> | miR-93-3p                 | 4 |
| <i>circPLEKHM3</i> | miR-940/6808-5p/6893-5p   | 2 |
| <i>circPLEKHM3</i> | miR-942-3p                | 2 |
| <i>circPLEKHM3</i> | miR-943                   | 2 |
| <i>circPROSC</i>   | miR-1184                  | 2 |

|                  |                                     |   |
|------------------|-------------------------------------|---|
| <i>circPROSC</i> | miR-1193                            | 1 |
| <i>circPROSC</i> | miR-1197                            | 1 |
| <i>circPROSC</i> | miR-1200                            | 2 |
| <i>circPROSC</i> | miR-1205                            | 2 |
| <i>circPROSC</i> | miR-1227-3p                         | 1 |
| <i>circPROSC</i> | miR-1231                            | 2 |
| <i>circPROSC</i> | miR-1245b-5p                        | 2 |
| <i>circPROSC</i> | miR-1250-3p                         | 1 |
| <i>circPROSC</i> | miR-1254/3116                       | 1 |
| <i>circPROSC</i> | miR-1266-5p/4518                    | 1 |
| <i>circPROSC</i> | miR-1272                            | 1 |
| <i>circPROSC</i> | miR-1277-3p                         | 2 |
| <i>circPROSC</i> | miR-1285-5p                         | 1 |
| <i>circPROSC</i> | miR-1287-3p                         | 2 |
| <i>circPROSC</i> | miR-1287-5p                         | 1 |
| <i>circPROSC</i> | miR-1290                            | 2 |
| <i>circPROSC</i> | miR-1295a                           | 2 |
| <i>circPROSC</i> | miR-1295b-3p                        | 2 |
| <i>circPROSC</i> | miR-1322                            | 1 |
| <i>circPROSC</i> | miR-1323                            | 1 |
| <i>circPROSC</i> | miR-135-5p                          | 1 |
| <i>circPROSC</i> | miR-135b-3p                         | 1 |
| <i>circPROSC</i> | miR-139-3p                          | 1 |
| <i>circPROSC</i> | miR-145-3p                          | 2 |
| <i>circPROSC</i> | miR-148b-5p/6874-3p                 | 2 |
| <i>circPROSC</i> | miR-17-3p                           | 2 |
| <i>circPROSC</i> | miR-17-5p/20-5p/93-5p/106-5p/519-3p | 2 |
| <i>circPROSC</i> | miR-18a-3p                          | 2 |
| <i>circPROSC</i> | miR-19-5p                           | 2 |
| <i>circPROSC</i> | miR-197-3p                          | 2 |
| <i>circPROSC</i> | miR-204-3p/4646-5p                  | 1 |
| <i>circPROSC</i> | miR-2052                            | 2 |
| <i>circPROSC</i> | miR-20b-3p                          | 1 |
| <i>circPROSC</i> | miR-2115-5p                         | 1 |
| <i>circPROSC</i> | miR-2117                            | 2 |
| <i>circPROSC</i> | miR-221-5p/8073                     | 1 |
| <i>circPROSC</i> | miR-224-5p                          | 1 |
| <i>circPROSC</i> | miR-2392                            | 1 |

|                  |                                              |   |
|------------------|----------------------------------------------|---|
| <i>circPROSC</i> | miR-2681-3p                                  | 1 |
| <i>circPROSC</i> | miR-27a-5p                                   | 1 |
| <i>circPROSC</i> | miR-29b-2-5p                                 | 2 |
| <i>circPROSC</i> | miR-302-3p/372-3p/373-3p/520-3p              | 3 |
| <i>circPROSC</i> | miR-3074-5p                                  | 2 |
| <i>circPROSC</i> | miR-30b-3p/1273h-5p/3689-3p/6779-5p/6780a-5p |   |
| <i>circPROSC</i> | miR-30c-3p/6788-5p                           | 1 |
| <i>circPROSC</i> | miR-3122/3913-5p                             | 2 |
| <i>circPROSC</i> | miR-3128                                     | 1 |
| <i>circPROSC</i> | miR-3135b                                    | 1 |
| <i>circPROSC</i> | miR-3137                                     | 1 |
| <i>circPROSC</i> | miR-3140-3p                                  | 2 |
| <i>circPROSC</i> | miR-3140-5p                                  | 2 |
| <i>circPROSC</i> | miR-3158-3p                                  | 2 |
| <i>circPROSC</i> | miR-3158-5p                                  | 2 |
| <i>circPROSC</i> | miR-3168                                     | 2 |
| <i>circPROSC</i> | miR-3187-3p                                  | 1 |
| <i>circPROSC</i> | miR-3192-5p                                  | 1 |
| <i>circPROSC</i> | miR-32-3p                                    | 1 |
| <i>circPROSC</i> | miR-324-3p/1913                              | 2 |
| <i>circPROSC</i> | miR-33b-3p/515-3p/519e-3p                    | 1 |
| <i>circPROSC</i> | miR-345-3p                                   | 2 |
| <i>circPROSC</i> | miR-345-5p                                   | 2 |
| <i>circPROSC</i> | miR-346                                      | 2 |
| <i>circPROSC</i> | miR-3652/4430                                | 2 |
| <i>circPROSC</i> | miR-3664-3p                                  | 1 |
| <i>circPROSC</i> | miR-3665                                     | 2 |
| <i>circPROSC</i> | miR-3686                                     | 1 |
| <i>circPROSC</i> | miR-371a-3p                                  | 1 |
| <i>circPROSC</i> | miR-371b-3p                                  | 1 |
| <i>circPROSC</i> | miR-375                                      | 2 |
| <i>circPROSC</i> | miR-378a-5p                                  | 2 |
| <i>circPROSC</i> | miR-378j/6839-5p                             | 1 |
| <i>circPROSC</i> | miR-3912-5p                                  | 2 |
| <i>circPROSC</i> | miR-3926                                     | 1 |
| <i>circPROSC</i> | miR-3974                                     | 1 |
| <i>circPROSC</i> | miR-3977                                     | 1 |
| <i>circPROSC</i> | miR-4252                                     | 2 |

|                  |                             |   |
|------------------|-----------------------------|---|
| <i>circPROSC</i> | miR-4274                    | 2 |
| <i>circPROSC</i> | miR-4277                    | 2 |
| <i>circPROSC</i> | miR-4283                    | 2 |
| <i>circPROSC</i> | miR-4293                    | 1 |
| <i>circPROSC</i> | miR-432-3p                  | 1 |
| <i>circPROSC</i> | miR-4326                    | 2 |
| <i>circPROSC</i> | miR-433-3p                  | 1 |
| <i>circPROSC</i> | miR-4435                    | 1 |
| <i>circPROSC</i> | miR-4437                    | 1 |
| <i>circPROSC</i> | miR-4446-3p                 | 2 |
| <i>circPROSC</i> | miR-4464/4748               | 2 |
| <i>circPROSC</i> | miR-4489                    | 2 |
| <i>circPROSC</i> | miR-4496                    | 1 |
| <i>circPROSC</i> | miR-4505/5787               | 2 |
| <i>circPROSC</i> | miR-4508                    | 2 |
| <i>circPROSC</i> | miR-450a-1-3p               | 2 |
| <i>circPROSC</i> | miR-450b-3p/769-3p          | 2 |
| <i>circPROSC</i> | miR-4519                    | 2 |
| <i>circPROSC</i> | miR-4524-5p                 | 2 |
| <i>circPROSC</i> | miR-4524b-3p                | 1 |
| <i>circPROSC</i> | miR-4539                    | 2 |
| <i>circPROSC</i> | miR-4641                    | 2 |
| <i>circPROSC</i> | miR-4652-3p                 | 1 |
| <i>circPROSC</i> | miR-4656                    | 2 |
| <i>circPROSC</i> | miR-4659a-5p/4659b-5p       | 1 |
| <i>circPROSC</i> | miR-4661-5p                 | 2 |
| <i>circPROSC</i> | miR-4675/4741               | 2 |
| <i>circPROSC</i> | miR-4683                    | 1 |
| <i>circPROSC</i> | miR-4695-3p                 | 1 |
| <i>circPROSC</i> | miR-4705                    | 1 |
| <i>circPROSC</i> | miR-4716-5p                 | 4 |
| <i>circPROSC</i> | miR-4719                    | 1 |
| <i>circPROSC</i> | miR-4720-5p/4799-3p/5588-5p | 1 |
| <i>circPROSC</i> | miR-4731-3p/4801            | 1 |
| <i>circPROSC</i> | miR-4731-5p                 | 1 |
| <i>circPROSC</i> | miR-4743-3p                 | 1 |
| <i>circPROSC</i> | miR-4750-3p                 | 2 |
| <i>circPROSC</i> | miR-4757-5p/6744-3p         | 2 |

|                  |                             |   |
|------------------|-----------------------------|---|
| <i>circPROSC</i> | miR-4773                    | 1 |
| <i>circPROSC</i> | miR-4786-3p                 | 1 |
| <i>circPROSC</i> | miR-4795-5p                 | 1 |
| <i>circPROSC</i> | miR-489-3p                  | 1 |
| <i>circPROSC</i> | miR-5000-3p                 | 1 |
| <i>circPROSC</i> | miR-5009-3p                 | 1 |
| <i>circPROSC</i> | miR-504-3p                  | 1 |
| <i>circPROSC</i> | miR-5087                    | 2 |
| <i>circPROSC</i> | miR-5088-5p                 | 2 |
| <i>circPROSC</i> | miR-5089-5p                 | 2 |
| <i>circPROSC</i> | miR-5090/6775-5p            | 2 |
| <i>circPROSC</i> | miR-514a-3p                 | 1 |
| <i>circPROSC</i> | miR-516a-3p/516b-3p/7162-5p | 1 |
| <i>circPROSC</i> | miR-519-3p                  | 3 |
| <i>circPROSC</i> | miR-548ah-5p/3609           | 2 |
| <i>circPROSC</i> | miR-548az-5p/548t-5p        | 2 |
| <i>circPROSC</i> | miR-548m                    | 1 |
| <i>circPROSC</i> | miR-548n                    | 2 |
| <i>circPROSC</i> | miR-548s                    | 1 |
| <i>circPROSC</i> | miR-548u/7161-5p            | 1 |
| <i>circPROSC</i> | miR-5584-3p                 | 2 |
| <i>circPROSC</i> | miR-5589-5p                 | 1 |
| <i>circPROSC</i> | miR-5590-5p                 | 1 |
| <i>circPROSC</i> | miR-5681a                   | 1 |
| <i>circPROSC</i> | miR-5704                    | 2 |
| <i>circPROSC</i> | miR-573/3616-5p             | 1 |
| <i>circPROSC</i> | miR-588                     | 1 |
| <i>circPROSC</i> | miR-589-3p                  | 1 |
| <i>circPROSC</i> | miR-590-3p                  | 1 |
| <i>circPROSC</i> | miR-596                     | 1 |
| <i>circPROSC</i> | miR-619-5p/6506-5p          | 1 |
| <i>circPROSC</i> | miR-628-5p                  | 2 |
| <i>circPROSC</i> | miR-632/4288                | 2 |
| <i>circPROSC</i> | miR-641/3617-5p             | 1 |
| <i>circPROSC</i> | miR-642-3p                  | 1 |
| <i>circPROSC</i> | miR-647                     | 1 |
| <i>circPROSC</i> | miR-6511-5p                 | 2 |
| <i>circPROSC</i> | miR-6513-5p                 | 2 |

|                  |                           |   |
|------------------|---------------------------|---|
| <i>circPROSC</i> | miR-654-3p                | 2 |
| <i>circPROSC</i> | miR-657                   | 2 |
| <i>circPROSC</i> | miR-659-3p                | 2 |
| <i>circPROSC</i> | miR-661                   | 1 |
| <i>circPROSC</i> | miR-663b                  | 1 |
| <i>circPROSC</i> | miR-6728-5p               | 2 |
| <i>circPROSC</i> | miR-6730-5p               | 1 |
| <i>circPROSC</i> | miR-6731-5p/8085          | 1 |
| <i>circPROSC</i> | miR-6740-5p               | 2 |
| <i>circPROSC</i> | miR-6784-5p               | 2 |
| <i>circPROSC</i> | miR-6788-3p               | 2 |
| <i>circPROSC</i> | miR-6800-5p               | 1 |
| <i>circPROSC</i> | miR-6802-5p               | 1 |
| <i>circPROSC</i> | miR-6815-3p               | 1 |
| <i>circPROSC</i> | miR-6815-5p/6865-5p       | 1 |
| <i>circPROSC</i> | miR-6822-3p               | 1 |
| <i>circPROSC</i> | miR-6829-5p               | 2 |
| <i>circPROSC</i> | miR-6834-3p               | 2 |
| <i>circPROSC</i> | miR-6842-3p               | 1 |
| <i>circPROSC</i> | miR-6868-5p               | 1 |
| <i>circPROSC</i> | miR-6878-5p               | 1 |
| <i>circPROSC</i> | miR-6882-3p               | 2 |
| <i>circPROSC</i> | miR-6882-5p               | 1 |
| <i>circPROSC</i> | miR-6884-3p               | 1 |
| <i>circPROSC</i> | miR-6885-3p               | 2 |
| <i>circPROSC</i> | miR-7-3p                  | 1 |
| <i>circPROSC</i> | miR-7109-3p               | 1 |
| <i>circPROSC</i> | miR-7151-5p               | 1 |
| <i>circPROSC</i> | miR-7152-5p               | 2 |
| <i>circPROSC</i> | miR-7153-3p               | 2 |
| <i>circPROSC</i> | miR-7154-5p               | 1 |
| <i>circPROSC</i> | miR-760                   | 1 |
| <i>circPROSC</i> | miR-762/4492/4498/5001-5p | 2 |
| <i>circPROSC</i> | miR-7641                  | 1 |
| <i>circPROSC</i> | miR-873-5p.1              | 1 |
| <i>circPROSC</i> | miR-876-5p                | 2 |
| <i>circPROSC</i> | miR-887-3p                | 1 |
| <i>circPROSC</i> | miR-887-5p                | 2 |

|                  |                       |   |
|------------------|-----------------------|---|
| <i>circPROSC</i> | miR-889-5p            | 1 |
| <i>circPROSC</i> | miR-933               | 2 |
| <i>circPROSC</i> | miR-96-3p             | 1 |
| <i>circPTK2</i>  | let-7-5p/98-5p        | 1 |
| <i>circPTK2</i>  | let-7a-2-3p/let-7g-3p | 3 |
| <i>circPTK2</i>  | let-7c-3p             | 3 |
| <i>circPTK2</i>  | miR-1-3p/206          | 4 |
| <i>circPTK2</i>  | miR-1-5p              | 1 |
| <i>circPTK2</i>  | miR-101-3p.1          | 2 |
| <i>circPTK2</i>  | miR-101-3p.2          | 5 |
| <i>circPTK2</i>  | miR-103-3p/107        | 1 |
| <i>circPTK2</i>  | miR-105-5p            | 5 |
| <i>circPTK2</i>  | miR-106a-3p           | 2 |
| <i>circPTK2</i>  | miR-1183              | 1 |
| <i>circPTK2</i>  | miR-1193              | 7 |
| <i>circPTK2</i>  | miR-1199-3p           | 2 |
| <i>circPTK2</i>  | miR-1202/3972         | 1 |
| <i>circPTK2</i>  | miR-1207-5p/4763-3p   | 1 |
| <i>circPTK2</i>  | miR-122-5p            | 1 |
| <i>circPTK2</i>  | miR-1225-5p           | 1 |
| <i>circPTK2</i>  | miR-1227-3p           | 1 |
| <i>circPTK2</i>  | miR-1228-5p           | 1 |
| <i>circPTK2</i>  | miR-1229-5p           | 1 |
| <i>circPTK2</i>  | miR-1231              | 3 |
| <i>circPTK2</i>  | miR-1233-5p/6778-5p   | 1 |
| <i>circPTK2</i>  | miR-1236-5p           | 1 |
| <i>circPTK2</i>  | miR-1237-3p           | 2 |
| <i>circPTK2</i>  | miR-1243              | 1 |
| <i>circPTK2</i>  | miR-1245a/8079        | 1 |
| <i>circPTK2</i>  | miR-1245b-3p          | 1 |
| <i>circPTK2</i>  | miR-1246              | 2 |
| <i>circPTK2</i>  | miR-1248              | 2 |
| <i>circPTK2</i>  | miR-125-5p            | 1 |
| <i>circPTK2</i>  | miR-1250-3p           | 6 |
| <i>circPTK2</i>  | miR-1251-3p           | 1 |
| <i>circPTK2</i>  | miR-1252-3p           | 4 |
| <i>circPTK2</i>  | miR-1253              | 1 |
| <i>circPTK2</i>  | miR-1254/3116         | 1 |



|                 |                    |   |
|-----------------|--------------------|---|
| <i>circPTK2</i> | miR-1255b-2-3p     | 2 |
| <i>circPTK2</i> | miR-1261           | 3 |
| <i>circPTK2</i> | miR-1265           | 1 |
| <i>circPTK2</i> | miR-1268a/1268b    | 1 |
| <i>circPTK2</i> | miR-1269           | 1 |
| <i>circPTK2</i> | miR-127-5p         | 4 |
| <i>circPTK2</i> | miR-1270           | 4 |
| <i>circPTK2</i> | miR-1272           | 1 |
| <i>circPTK2</i> | miR-1273d          | 1 |
| <i>circPTK2</i> | miR-1273g-3p       | 1 |
| <i>circPTK2</i> | miR-1273h-3p       | 2 |
| <i>circPTK2</i> | miR-1276           | 1 |
| <i>circPTK2</i> | miR-1277-5p        | 1 |
| <i>circPTK2</i> | miR-1278           | 6 |
| <i>circPTK2</i> | miR-1279           | 3 |
| <i>circPTK2</i> | miR-128-3p         | 3 |
| <i>circPTK2</i> | miR-1282           | 1 |
| <i>circPTK2</i> | miR-1283           | 1 |
| <i>circPTK2</i> | miR-1284           | 1 |
| <i>circPTK2</i> | miR-1286           | 1 |
| <i>circPTK2</i> | miR-1287-3p        | 5 |
| <i>circPTK2</i> | miR-1289           | 3 |
| <i>circPTK2</i> | miR-129-5p         | 6 |
| <i>circPTK2</i> | miR-1290           | 1 |
| <i>circPTK2</i> | miR-1295a          | 1 |
| <i>circPTK2</i> | miR-1295b-5p/1912  | 1 |
| <i>circPTK2</i> | miR-1298-5p        | 1 |
| <i>circPTK2</i> | miR-1299           | 5 |
| <i>circPTK2</i> | miR-1302/4298      | 1 |
| <i>circPTK2</i> | miR-1304-3p        | 1 |
| <i>circPTK2</i> | miR-1305           | 2 |
| <i>circPTK2</i> | miR-132-3p/212-3p  | 2 |
| <i>circPTK2</i> | miR-1322           | 1 |
| <i>circPTK2</i> | miR-133a-3p.2/133b | 1 |
| <i>circPTK2</i> | miR-134-3p         | 1 |
| <i>circPTK2</i> | miR-1343-3p        | 1 |
| <i>circPTK2</i> | miR-135-5p         | 1 |
| <i>circPTK2</i> | miR-136-5p         | 1 |

|                 |                                    |   |
|-----------------|------------------------------------|---|
| <i>circPTK2</i> | miR-137                            | 1 |
| <i>circPTK2</i> | miR-139-3p                         | 1 |
| <i>circPTK2</i> | miR-139-5p                         | 1 |
| <i>circPTK2</i> | miR-141-5p                         | 1 |
| <i>circPTK2</i> | miR-143-5p                         | 1 |
| <i>circPTK2</i> | miR-144-3p                         | 2 |
| <i>circPTK2</i> | miR-144-5p                         | 1 |
| <i>circPTK2</i> | miR-146-5p                         | 2 |
| <i>circPTK2</i> | miR-1468-3p                        | 3 |
| <i>circPTK2</i> | miR-146a-3p                        | 1 |
| <i>circPTK2</i> | miR-147a                           | 1 |
| <i>circPTK2</i> | miR-148a-5p                        | 1 |
| <i>circPTK2</i> | miR-148b-5p/6874-3p                | 1 |
| <i>circPTK2</i> | miR-149-3p/4728-5p/6785-5p/6883-5p | 2 |
| <i>circPTK2</i> | miR-153-3p                         | 3 |
| <i>circPTK2</i> | miR-153-5p                         | 6 |
| <i>circPTK2</i> | miR-155-3p                         | 1 |
| <i>circPTK2</i> | miR-15b-3p                         | 1 |
| <i>circPTK2</i> | miR-16-2-3p/195-3p                 | 1 |
| <i>circPTK2</i> | miR-182-3p                         | 1 |
| <i>circPTK2</i> | miR-1827                           | 1 |
| <i>circPTK2</i> | miR-183-3p                         | 1 |
| <i>circPTK2</i> | miR-185-5p                         | 4 |
| <i>circPTK2</i> | miR-186-5p                         | 3 |
| <i>circPTK2</i> | miR-18a-3p                         | 1 |
| <i>circPTK2</i> | miR-19-5p                          | 1 |
| <i>circPTK2</i> | miR-1908-5p                        | 1 |
| <i>circPTK2</i> | miR-190a-3p                        | 1 |
| <i>circPTK2</i> | miR-1910-3p/6511a-5p               | 1 |
| <i>circPTK2</i> | miR-1910-5p                        | 1 |
| <i>circPTK2</i> | miR-1915-3p/6764-5p                | 4 |
| <i>circPTK2</i> | miR-193-3p                         | 1 |
| <i>circPTK2</i> | miR-194-5p                         | 3 |
| <i>circPTK2</i> | miR-196b-3p                        | 1 |
| <i>circPTK2</i> | miR-197-3p                         | 1 |
| <i>circPTK2</i> | miR-197-5p/3132                    | 1 |
| <i>circPTK2</i> | miR-200ab-5p                       | 1 |
| <i>circPTK2</i> | miR-200c-5p/550a-3p                | 1 |

|                 |                    |   |
|-----------------|--------------------|---|
| <i>circPTK2</i> | miR-202-5p         | 1 |
| <i>circPTK2</i> | miR-203a-3p.1      | 1 |
| <i>circPTK2</i> | miR-203b-3p        | 2 |
| <i>circPTK2</i> | miR-205-5p         | 1 |
| <i>circPTK2</i> | miR-2052           | 1 |
| <i>circPTK2</i> | miR-2054           | 3 |
| <i>circPTK2</i> | miR-208-5p         | 1 |
| <i>circPTK2</i> | miR-20b-3p         | 1 |
| <i>circPTK2</i> | miR-21-3p/3591-3p  | 1 |
| <i>circPTK2</i> | miR-21-5p/590-5p   | 4 |
| <i>circPTK2</i> | miR-210-5p         | 1 |
| <i>circPTK2</i> | miR-2110           | 2 |
| <i>circPTK2</i> | miR-2114-5p        | 1 |
| <i>circPTK2</i> | miR-214-3p/3619-5p | 1 |
| <i>circPTK2</i> | miR-214-5p         | 2 |
| <i>circPTK2</i> | miR-217            | 1 |
| <i>circPTK2</i> | miR-218-1-3p       | 1 |
| <i>circPTK2</i> | miR-218-2-3p       | 1 |
| <i>circPTK2</i> | miR-219-5p         | 3 |
| <i>circPTK2</i> | miR-219a-2-3p      | 2 |
| <i>circPTK2</i> | miR-219b-3p        | 2 |
| <i>circPTK2</i> | miR-221-5p/8073    | 1 |
| <i>circPTK2</i> | miR-223-3p         | 4 |
| <i>circPTK2</i> | miR-2276-5p        | 1 |
| <i>circPTK2</i> | miR-2277-3p        | 1 |
| <i>circPTK2</i> | miR-2278           | 3 |
| <i>circPTK2</i> | miR-2355-3p        | 1 |
| <i>circPTK2</i> | miR-2355-5p        | 2 |
| <i>circPTK2</i> | miR-2392           | 2 |
| <i>circPTK2</i> | miR-24-3p          | 1 |
| <i>circPTK2</i> | miR-24-5p          | 7 |
| <i>circPTK2</i> | miR-2467-3p        | 1 |
| <i>circPTK2</i> | miR-2467-5p        | 1 |
| <i>circPTK2</i> | miR-2681-3p        | 4 |
| <i>circPTK2</i> | miR-2681-5p        | 1 |
| <i>circPTK2</i> | miR-27-3p          | 3 |
| <i>circPTK2</i> | miR-2861           | 1 |
| <i>circPTK2</i> | miR-297            | 7 |

|                 |                                              |   |
|-----------------|----------------------------------------------|---|
| <i>circPTK2</i> | miR-299-3p                                   | 1 |
| <i>circPTK2</i> | miR-299-5p                                   | 2 |
| <i>circPTK2</i> | miR-29a-5p                                   | 1 |
| <i>circPTK2</i> | miR-29b-1-5p                                 | 1 |
| <i>circPTK2</i> | miR-29b-2-5p                                 | 2 |
| <i>circPTK2</i> | miR-30-3p                                    | 1 |
| <i>circPTK2</i> | miR-301a-5p/301b-5p                          | 1 |
| <i>circPTK2</i> | miR-302a-5p                                  | 2 |
| <i>circPTK2</i> | miR-302b-5p/302d-5p                          | 1 |
| <i>circPTK2</i> | miR-302f                                     | 1 |
| <i>circPTK2</i> | miR-3064-3p                                  | 1 |
| <i>circPTK2</i> | miR-3065-3p                                  | 1 |
| <i>circPTK2</i> | miR-30b-3p/1273h-5p/3689-3p/6779-5p/6780a-5p | 2 |
| <i>circPTK2</i> | miR-30c-3p/6788-5p                           | 2 |
| <i>circPTK2</i> | miR-3115                                     | 1 |
| <i>circPTK2</i> | miR-3120-5p                                  | 3 |
| <i>circPTK2</i> | miR-3122/3913-5p                             | 2 |
| <i>circPTK2</i> | miR-3123                                     | 7 |
| <i>circPTK2</i> | miR-3125/3916/6859-5p                        | 1 |
| <i>circPTK2</i> | miR-3127-3p/6756-3p                          | 1 |
| <i>circPTK2</i> | miR-3128                                     | 1 |
| <i>circPTK2</i> | miR-3130-3p                                  | 2 |
| <i>circPTK2</i> | miR-3130-5p/4482-5p                          | 1 |
| <i>circPTK2</i> | miR-3133                                     | 3 |
| <i>circPTK2</i> | miR-3136-3p/7155-3p                          | 2 |
| <i>circPTK2</i> | miR-3137                                     | 1 |
| <i>circPTK2</i> | miR-3145-5p                                  | 2 |
| <i>circPTK2</i> | miR-3148                                     | 2 |
| <i>circPTK2</i> | miR-3150a-3p                                 | 2 |
| <i>circPTK2</i> | miR-3150b-3p                                 | 1 |
| <i>circPTK2</i> | miR-3152-5p                                  | 2 |
| <i>circPTK2</i> | miR-3153/6733-5p/6739-5p                     | 1 |
| <i>circPTK2</i> | miR-3157-5p                                  | 1 |
| <i>circPTK2</i> | miR-3159                                     | 1 |
| <i>circPTK2</i> | miR-3160-3p                                  | 4 |
| <i>circPTK2</i> | miR-3165                                     | 1 |
| <i>circPTK2</i> | miR-3168                                     | 1 |
| <i>circPTK2</i> | miR-3171                                     | 2 |

|                 |                     |   |
|-----------------|---------------------|---|
| <i>circPTK2</i> | miR-3173-3p/6891-5p | 1 |
| <i>circPTK2</i> | miR-3176/3922-3p    | 1 |
| <i>circPTK2</i> | miR-3178            | 1 |
| <i>circPTK2</i> | miR-3182            | 2 |
| <i>circPTK2</i> | miR-3185            | 1 |
| <i>circPTK2</i> | miR-3187-3p         | 2 |
| <i>circPTK2</i> | miR-3188            | 1 |
| <i>circPTK2</i> | miR-3190-5p         | 1 |
| <i>circPTK2</i> | miR-3191-5p         | 1 |
| <i>circPTK2</i> | miR-3192-3p         | 1 |
| <i>circPTK2</i> | miR-3193            | 1 |
| <i>circPTK2</i> | miR-3194-3p         | 2 |
| <i>circPTK2</i> | miR-3194-5p         | 1 |
| <i>circPTK2</i> | miR-3198/4309       | 3 |
| <i>circPTK2</i> | miR-32-3p           | 1 |
| <i>circPTK2</i> | miR-320             | 4 |
| <i>circPTK2</i> | miR-320e            | 6 |
| <i>circPTK2</i> | miR-323a-5p         | 1 |
| <i>circPTK2</i> | miR-323b-3p         | 1 |
| <i>circPTK2</i> | miR-324-3p/1913     | 1 |
| <i>circPTK2</i> | miR-324-5p          | 1 |
| <i>circPTK2</i> | miR-325             | 1 |
| <i>circPTK2</i> | miR-326             | 2 |
| <i>circPTK2</i> | miR-329-5p          | 1 |
| <i>circPTK2</i> | miR-330-3p          | 2 |
| <i>circPTK2</i> | miR-330-3p.2        | 1 |
| <i>circPTK2</i> | miR-331-3p          | 1 |
| <i>circPTK2</i> | miR-335-3p          | 3 |
| <i>circPTK2</i> | miR-335-5p          | 1 |
| <i>circPTK2</i> | miR-338-3p          | 2 |
| <i>circPTK2</i> | miR-33a-3p          | 5 |
| <i>circPTK2</i> | miR-340-3p/6827-3p  | 1 |
| <i>circPTK2</i> | miR-340-5p          | 2 |
| <i>circPTK2</i> | miR-34a-3p          | 4 |
| <i>circPTK2</i> | miR-34b-3p          | 1 |
| <i>circPTK2</i> | miR-34b-5p/449c-5p  | 1 |
| <i>circPTK2</i> | miR-34c-3p          | 1 |
| <i>circPTK2</i> | miR-3605-3p         | 1 |

|                 |                           |   |
|-----------------|---------------------------|---|
| <i>circPTK2</i> | miR-3606-5p               | 1 |
| <i>circPTK2</i> | miR-3607-3p               | 3 |
| <i>circPTK2</i> | miR-361-5p                | 5 |
| <i>circPTK2</i> | miR-3610                  | 1 |
| <i>circPTK2</i> | miR-3611                  | 4 |
| <i>circPTK2</i> | miR-3612                  | 2 |
| <i>circPTK2</i> | miR-3613-3p               | 1 |
| <i>circPTK2</i> | miR-3614-3p               | 3 |
| <i>circPTK2</i> | miR-3614-5p               | 4 |
| <i>circPTK2</i> | miR-3617-3p               | 4 |
| <i>circPTK2</i> | miR-3619-3p               | 1 |
| <i>circPTK2</i> | miR-3621                  | 1 |
| <i>circPTK2</i> | miR-3622a-3p/3622b-3p     | 1 |
| <i>circPTK2</i> | miR-3646                  | 4 |
| <i>circPTK2</i> | miR-365-3p                | 2 |
| <i>circPTK2</i> | miR-3650                  | 2 |
| <i>circPTK2</i> | miR-3653-3p               | 1 |
| <i>circPTK2</i> | miR-3654                  | 1 |
| <i>circPTK2</i> | miR-3656                  | 1 |
| <i>circPTK2</i> | miR-3657                  | 5 |
| <i>circPTK2</i> | miR-3658                  | 1 |
| <i>circPTK2</i> | miR-3662                  | 1 |
| <i>circPTK2</i> | miR-3671                  | 4 |
| <i>circPTK2</i> | miR-3672/6864-3p          | 1 |
| <i>circPTK2</i> | miR-3675-3p               | 1 |
| <i>circPTK2</i> | miR-3675-5p               | 1 |
| <i>circPTK2</i> | miR-3678-3p               | 2 |
| <i>circPTK2</i> | miR-3679-3p               | 2 |
| <i>circPTK2</i> | miR-3680-3p               | 7 |
| <i>circPTK2</i> | miR-3682-5p               | 1 |
| <i>circPTK2</i> | miR-3685                  | 1 |
| <i>circPTK2</i> | miR-3688-3p               | 2 |
| <i>circPTK2</i> | miR-3689d/6851-5p         | 2 |
| <i>circPTK2</i> | miR-3691-3p               | 1 |
| <i>circPTK2</i> | miR-371-5p                | 3 |
| <i>circPTK2</i> | miR-371b-5p/373-5p/616-5p | 3 |
| <i>circPTK2</i> | miR-372-5p                | 3 |
| <i>circPTK2</i> | miR-374a-3p               | 1 |

|                 |                     |   |
|-----------------|---------------------|---|
| <i>circPTK2</i> | miR-375             | 1 |
| <i>circPTK2</i> | miR-376-3p          | 1 |
| <i>circPTK2</i> | miR-376b-5p/376c-5p | 3 |
| <i>circPTK2</i> | miR-377-5p/6086     | 1 |
| <i>circPTK2</i> | miR-378-3p          | 2 |
| <i>circPTK2</i> | miR-378g            | 1 |
| <i>circPTK2</i> | miR-378j/6839-5p    | 3 |
| <i>circPTK2</i> | miR-379-5p          | 2 |
| <i>circPTK2</i> | miR-381-3p          | 1 |
| <i>circPTK2</i> | miR-382-3p          | 1 |
| <i>circPTK2</i> | miR-383-3p          | 1 |
| <i>circPTK2</i> | miR-383-5p.2        | 1 |
| <i>circPTK2</i> | miR-384             | 1 |
| <i>circPTK2</i> | miR-3908            | 1 |
| <i>circPTK2</i> | miR-3909            | 4 |
| <i>circPTK2</i> | miR-3917            | 3 |
| <i>circPTK2</i> | miR-3919            | 5 |
| <i>circPTK2</i> | miR-3920            | 4 |
| <i>circPTK2</i> | miR-3921/4653-5p    | 1 |
| <i>circPTK2</i> | miR-3922-5p         | 1 |
| <i>circPTK2</i> | miR-3925-3p         | 2 |
| <i>circPTK2</i> | miR-3925-5p         | 7 |
| <i>circPTK2</i> | miR-3926            | 3 |
| <i>circPTK2</i> | miR-3927-5p         | 5 |
| <i>circPTK2</i> | miR-3928-5p/6806-3p | 4 |
| <i>circPTK2</i> | miR-3929/4419b/4478 | 1 |
| <i>circPTK2</i> | miR-3934-3p         | 3 |
| <i>circPTK2</i> | miR-3935            | 2 |
| <i>circPTK2</i> | miR-3937            | 2 |
| <i>circPTK2</i> | miR-3938            | 1 |
| <i>circPTK2</i> | miR-3941            | 4 |
| <i>circPTK2</i> | miR-3942-3p         | 2 |
| <i>circPTK2</i> | miR-3942-5p         | 1 |
| <i>circPTK2</i> | miR-3943            | 1 |
| <i>circPTK2</i> | miR-3944-5p         | 1 |
| <i>circPTK2</i> | miR-3975            | 1 |
| <i>circPTK2</i> | miR-3976            | 1 |
| <i>circPTK2</i> | miR-409-3p          | 1 |

|                 |                           |    |
|-----------------|---------------------------|----|
| <i>circPTK2</i> | miR-410-3p                | 2  |
| <i>circPTK2</i> | miR-411-3p                | 2  |
| <i>circPTK2</i> | miR-412-5p                | 1  |
| <i>circPTK2</i> | miR-423-3p                | 3  |
| <i>circPTK2</i> | miR-425-3p                | 1  |
| <i>circPTK2</i> | miR-425-5p                | 1  |
| <i>circPTK2</i> | miR-4257                  | 1  |
| <i>circPTK2</i> | miR-4264                  | 1  |
| <i>circPTK2</i> | miR-4265/4296/4322        | 1  |
| <i>circPTK2</i> | miR-4266                  | 2  |
| <i>circPTK2</i> | miR-4267                  | 2  |
| <i>circPTK2</i> | miR-4271/4725-3p/6780b-5p | 1  |
| <i>circPTK2</i> | miR-4273/7156-5p          | 3  |
| <i>circPTK2</i> | miR-4275                  | 1  |
| <i>circPTK2</i> | miR-4276                  | 1  |
| <i>circPTK2</i> | miR-4282                  | 4  |
| <i>circPTK2</i> | miR-4284                  | 1  |
| <i>circPTK2</i> | miR-4287/4685-3p          | 1  |
| <i>circPTK2</i> | miR-4289                  | 2  |
| <i>circPTK2</i> | miR-4292/6791-5p          | 1  |
| <i>circPTK2</i> | miR-4293                  | 1  |
| <i>circPTK2</i> | miR-4294                  | 3  |
| <i>circPTK2</i> | miR-4297/5581-5p          | 1  |
| <i>circPTK2</i> | miR-4299                  | 6  |
| <i>circPTK2</i> | miR-4302                  | 1  |
| <i>circPTK2</i> | miR-4303                  | 1  |
| <i>circPTK2</i> | miR-4307                  | 4  |
| <i>circPTK2</i> | miR-4308                  | 1  |
| <i>circPTK2</i> | miR-4311                  | 1  |
| <i>circPTK2</i> | miR-4317                  | 4  |
| <i>circPTK2</i> | miR-4318                  | 1  |
| <i>circPTK2</i> | miR-432-3p                | 2  |
| <i>circPTK2</i> | miR-432-5p                | 4  |
| <i>circPTK2</i> | miR-4323                  | 1  |
| <i>circPTK2</i> | miR-4324                  | 1  |
| <i>circPTK2</i> | miR-4325                  | 2  |
| <i>circPTK2</i> | miR-4328                  | 11 |
| <i>circPTK2</i> | miR-433-3p                | 1  |



|                 |                    |   |
|-----------------|--------------------|---|
| <i>circPTK2</i> | miR-4417           | 1 |
| <i>circPTK2</i> | miR-4421/5699-3p   | 3 |
| <i>circPTK2</i> | miR-4422           | 1 |
| <i>circPTK2</i> | miR-4428           | 1 |
| <i>circPTK2</i> | miR-4433a-3p       | 3 |
| <i>circPTK2</i> | miR-4433a-5p       | 1 |
| <i>circPTK2</i> | miR-4433b-3p       | 1 |
| <i>circPTK2</i> | miR-4434/4516/5703 | 3 |
| <i>circPTK2</i> | miR-4435           | 2 |
| <i>circPTK2</i> | miR-4438           | 1 |
| <i>circPTK2</i> | miR-4443           | 1 |
| <i>circPTK2</i> | miR-4445-5p        | 3 |
| <i>circPTK2</i> | miR-4450           | 1 |
| <i>circPTK2</i> | miR-4451           | 2 |
| <i>circPTK2</i> | miR-4452           | 1 |
| <i>circPTK2</i> | miR-4456           | 6 |
| <i>circPTK2</i> | miR-4459           | 3 |
| <i>circPTK2</i> | miR-4464/4748      | 2 |
| <i>circPTK2</i> | miR-4467           | 2 |
| <i>circPTK2</i> | miR-4469           | 1 |
| <i>circPTK2</i> | miR-4477a          | 1 |
| <i>circPTK2</i> | miR-448            | 3 |
| <i>circPTK2</i> | miR-4480           | 2 |
| <i>circPTK2</i> | miR-4486           | 1 |
| <i>circPTK2</i> | miR-4487           | 4 |
| <i>circPTK2</i> | miR-4490           | 1 |
| <i>circPTK2</i> | miR-4491/4657      | 1 |
| <i>circPTK2</i> | miR-4495           | 2 |
| <i>circPTK2</i> | miR-4496           | 7 |
| <i>circPTK2</i> | miR-4502           | 1 |
| <i>circPTK2</i> | miR-4503           | 1 |
| <i>circPTK2</i> | miR-4504           | 1 |
| <i>circPTK2</i> | miR-4506           | 1 |
| <i>circPTK2</i> | miR-450a-1-3p      | 2 |
| <i>circPTK2</i> | miR-450b-5p        | 7 |
| <i>circPTK2</i> | miR-4511           | 1 |
| <i>circPTK2</i> | miR-4517           | 1 |
| <i>circPTK2</i> | miR-452-3p         | 1 |

|                 |                          |   |
|-----------------|--------------------------|---|
| <i>circPTK2</i> | miR-4520-2-3p            | 2 |
| <i>circPTK2</i> | miR-4520-3p              | 3 |
| <i>circPTK2</i> | miR-4528                 | 2 |
| <i>circPTK2</i> | miR-4529-3p              | 2 |
| <i>circPTK2</i> | miR-4530                 | 2 |
| <i>circPTK2</i> | miR-4531                 | 4 |
| <i>circPTK2</i> | miR-4539                 | 2 |
| <i>circPTK2</i> | miR-4540                 | 1 |
| <i>circPTK2</i> | miR-455-3p.1             | 1 |
| <i>circPTK2</i> | miR-455-3p.2             | 1 |
| <i>circPTK2</i> | miR-455-5p               | 1 |
| <i>circPTK2</i> | miR-4633-3p/6500-5p      | 3 |
| <i>circPTK2</i> | miR-4633-5p              | 5 |
| <i>circPTK2</i> | miR-4635                 | 1 |
| <i>circPTK2</i> | miR-4638-3p              | 2 |
| <i>circPTK2</i> | miR-4643                 | 1 |
| <i>circPTK2</i> | miR-4646-3p              | 1 |
| <i>circPTK2</i> | miR-4648                 | 1 |
| <i>circPTK2</i> | miR-4649-3p              | 7 |
| <i>circPTK2</i> | miR-4650-3p              | 2 |
| <i>circPTK2</i> | miR-4652-3p              | 1 |
| <i>circPTK2</i> | miR-4654/4769-5p         | 1 |
| <i>circPTK2</i> | miR-4659a-5p/4659b-5p    | 1 |
| <i>circPTK2</i> | miR-466                  | 1 |
| <i>circPTK2</i> | miR-4661-5p              | 1 |
| <i>circPTK2</i> | miR-4662a-3p             | 2 |
| <i>circPTK2</i> | miR-4663                 | 4 |
| <i>circPTK2</i> | miR-4666a-3p             | 1 |
| <i>circPTK2</i> | miR-4666b                | 1 |
| <i>circPTK2</i> | miR-4667-5p/4700-5p/8089 | 1 |
| <i>circPTK2</i> | miR-4668-5p              | 1 |
| <i>circPTK2</i> | miR-4669                 | 5 |
| <i>circPTK2</i> | miR-4672                 | 4 |
| <i>circPTK2</i> | miR-4677-3p              | 1 |
| <i>circPTK2</i> | miR-4677-5p              | 3 |
| <i>circPTK2</i> | miR-4679                 | 1 |
| <i>circPTK2</i> | miR-4683                 | 1 |
| <i>circPTK2</i> | miR-4684-3p              | 2 |

|                 |                             |   |
|-----------------|-----------------------------|---|
| <i>circPTK2</i> | miR-4684-5p                 | 1 |
| <i>circPTK2</i> | miR-4690-5p                 | 1 |
| <i>circPTK2</i> | miR-4691-3p                 | 2 |
| <i>circPTK2</i> | miR-4691-5p/6792-3p         | 1 |
| <i>circPTK2</i> | miR-4693-3p                 | 1 |
| <i>circPTK2</i> | miR-4693-5p                 | 1 |
| <i>circPTK2</i> | miR-4694-3p                 | 2 |
| <i>circPTK2</i> | miR-4695-5p                 | 1 |
| <i>circPTK2</i> | miR-4697-3p                 | 4 |
| <i>circPTK2</i> | miR-4699-5p                 | 2 |
| <i>circPTK2</i> | miR-4705                    | 1 |
| <i>circPTK2</i> | miR-4709-3p                 | 1 |
| <i>circPTK2</i> | miR-4709-5p                 | 1 |
| <i>circPTK2</i> | miR-4711-5p                 | 1 |
| <i>circPTK2</i> | miR-4712-3p                 | 1 |
| <i>circPTK2</i> | miR-4716-5p                 | 1 |
| <i>circPTK2</i> | miR-4717-5p                 | 2 |
| <i>circPTK2</i> | miR-4720-3p                 | 1 |
| <i>circPTK2</i> | miR-4720-5p/4799-3p/5588-5p | 1 |
| <i>circPTK2</i> | miR-4722-5p                 | 1 |
| <i>circPTK2</i> | miR-4724-3p                 | 1 |
| <i>circPTK2</i> | miR-4724-5p                 | 2 |
| <i>circPTK2</i> | miR-4726-3p                 | 4 |
| <i>circPTK2</i> | miR-4728-3p                 | 2 |
| <i>circPTK2</i> | miR-4730                    | 1 |
| <i>circPTK2</i> | miR-4731-5p                 | 1 |
| <i>circPTK2</i> | miR-4732-3p                 | 1 |
| <i>circPTK2</i> | miR-4733-5p                 | 2 |
| <i>circPTK2</i> | miR-4736                    | 1 |
| <i>circPTK2</i> | miR-4742-3p                 | 5 |
| <i>circPTK2</i> | miR-4743-3p                 | 1 |
| <i>circPTK2</i> | miR-4743-5p                 | 1 |
| <i>circPTK2</i> | miR-4746-3p                 | 1 |
| <i>circPTK2</i> | miR-4749-3p                 | 1 |
| <i>circPTK2</i> | miR-4756-3p                 | 5 |
| <i>circPTK2</i> | miR-4757-3p                 | 1 |
| <i>circPTK2</i> | miR-4760-3p                 | 2 |
| <i>circPTK2</i> | miR-4762-3p                 | 1 |

|                 |                     |   |
|-----------------|---------------------|---|
| <i>circPTK2</i> | miR-4762-5p         | 1 |
| <i>circPTK2</i> | miR-4764-5p         | 2 |
| <i>circPTK2</i> | miR-4765            | 1 |
| <i>circPTK2</i> | miR-4766-5p         | 1 |
| <i>circPTK2</i> | miR-4768-3p         | 3 |
| <i>circPTK2</i> | miR-4768-5p/6833-3p | 1 |
| <i>circPTK2</i> | miR-4773            | 2 |
| <i>circPTK2</i> | miR-4774-3p         | 2 |
| <i>circPTK2</i> | miR-4774-5p         | 1 |
| <i>circPTK2</i> | miR-4776-3p         | 1 |
| <i>circPTK2</i> | miR-4777-3p         | 1 |
| <i>circPTK2</i> | miR-4777-5p         | 3 |
| <i>circPTK2</i> | miR-4778-5p         | 1 |
| <i>circPTK2</i> | miR-4779            | 1 |
| <i>circPTK2</i> | miR-4781-3p         | 1 |
| <i>circPTK2</i> | miR-4782-5p/5706    | 5 |
| <i>circPTK2</i> | miR-4785            | 1 |
| <i>circPTK2</i> | miR-4786-3p         | 1 |
| <i>circPTK2</i> | miR-4786-5p         | 1 |
| <i>circPTK2</i> | miR-4789-3p         | 1 |
| <i>circPTK2</i> | miR-4793-3p         | 2 |
| <i>circPTK2</i> | miR-4793-5p         | 5 |
| <i>circPTK2</i> | miR-4797-3p         | 1 |
| <i>circPTK2</i> | miR-4797-5p         | 3 |
| <i>circPTK2</i> | miR-4799-5p         | 1 |
| <i>circPTK2</i> | miR-4802-3p         | 1 |
| <i>circPTK2</i> | miR-4802-5p         | 4 |
| <i>circPTK2</i> | miR-4804-3p         | 1 |
| <i>circPTK2</i> | miR-483-3p.2        | 2 |
| <i>circPTK2</i> | miR-485-5p          | 1 |
| <i>circPTK2</i> | miR-486-5p          | 7 |
| <i>circPTK2</i> | miR-488-3p          | 1 |
| <i>circPTK2</i> | miR-490-5p          | 3 |
| <i>circPTK2</i> | miR-491-3p          | 1 |
| <i>circPTK2</i> | miR-493-5p          | 3 |
| <i>circPTK2</i> | miR-498             | 1 |
| <i>circPTK2</i> | miR-5003-3p         | 1 |
| <i>circPTK2</i> | miR-5004-3p         | 8 |

|                 |                             |   |
|-----------------|-----------------------------|---|
| <i>circPTK2</i> | miR-5006-5p                 | 1 |
| <i>circPTK2</i> | miR-5007-3p                 | 3 |
| <i>circPTK2</i> | miR-5007-5p                 | 1 |
| <i>circPTK2</i> | miR-5008-3p/6737-3p/7157-3p | 3 |
| <i>circPTK2</i> | miR-5008-5p                 | 1 |
| <i>circPTK2</i> | miR-5009-3p                 | 1 |
| <i>circPTK2</i> | miR-5009-5p/8058            | 1 |
| <i>circPTK2</i> | miR-500a-5p                 | 3 |
| <i>circPTK2</i> | miR-500b-3p                 | 1 |
| <i>circPTK2</i> | miR-5011-3p                 | 1 |
| <i>circPTK2</i> | miR-5011-5p                 | 3 |
| <i>circPTK2</i> | miR-503-3p                  | 1 |
| <i>circPTK2</i> | miR-504-3p                  | 1 |
| <i>circPTK2</i> | miR-505-5p                  | 1 |
| <i>circPTK2</i> | miR-507/557                 | 7 |
| <i>circPTK2</i> | miR-508-3p                  | 3 |
| <i>circPTK2</i> | miR-508-5p                  | 2 |
| <i>circPTK2</i> | miR-509-3-5p/509-5p/4418    | 1 |
| <i>circPTK2</i> | miR-509-3p                  | 5 |
| <i>circPTK2</i> | miR-5093                    | 5 |
| <i>circPTK2</i> | miR-510-3p                  | 1 |
| <i>circPTK2</i> | miR-510-5p                  | 1 |
| <i>circPTK2</i> | miR-511-5p                  | 1 |
| <i>circPTK2</i> | miR-512-5p                  | 3 |
| <i>circPTK2</i> | miR-513a-5p                 | 3 |
| <i>circPTK2</i> | miR-514a-3p                 | 1 |
| <i>circPTK2</i> | miR-516b-5p                 | 5 |
| <i>circPTK2</i> | miR-5186                    | 1 |
| <i>circPTK2</i> | miR-5189-3p                 | 1 |
| <i>circPTK2</i> | miR-518c-5p                 | 2 |
| <i>circPTK2</i> | miR-518d-5p/519-5p          | 3 |
| <i>circPTK2</i> | miR-5192                    | 4 |
| <i>circPTK2</i> | miR-5193                    | 1 |
| <i>circPTK2</i> | miR-5196-3p                 | 5 |
| <i>circPTK2</i> | miR-519d-5p                 | 1 |
| <i>circPTK2</i> | miR-520f-5p                 | 1 |
| <i>circPTK2</i> | miR-520g-5p                 | 4 |
| <i>circPTK2</i> | miR-522-3p                  | 2 |

|                 |                                                                  |   |
|-----------------|------------------------------------------------------------------|---|
| <i>circPTK2</i> | miR-524-3p/525-3p                                                | 1 |
| <i>circPTK2</i> | miR-524-5p                                                       | 2 |
| <i>circPTK2</i> | miR-525-5p                                                       | 1 |
| <i>circPTK2</i> | miR-532-5p                                                       | 7 |
| <i>circPTK2</i> | miR-539-5p                                                       | 1 |
| <i>circPTK2</i> | miR-542-3p                                                       | 1 |
| <i>circPTK2</i> | miR-544b                                                         | 1 |
| <i>circPTK2</i> | miR-545-5p                                                       | 1 |
| <i>circPTK2</i> | miR-548ac/548bb-3p/548d-3p/548h-3p/548z                          | 2 |
| <i>circPTK2</i> | miR-548aj-5p/548f-5p/548g-5p/548x-5p                             | 3 |
| <i>circPTK2</i> | miR-548aq-3p/548am-3p/548aj-3p/548ah-3p/548ae-3p/548j-3p/548x-3p | 2 |
| <i>circPTK2</i> | miR-548at-5p                                                     | 1 |
| <i>circPTK2</i> | miR-548av-3p                                                     | 1 |
| <i>circPTK2</i> | miR-548az-3p/548ar-3p/548a-3p/548e-3p/548f-3p                    | 2 |
| <i>circPTK2</i> | miR-548b-3p                                                      | 1 |
| <i>circPTK2</i> | miR-548c-3p                                                      | 2 |
| <i>circPTK2</i> | miR-548e-5p                                                      | 1 |
| <i>circPTK2</i> | miR-548g-3p                                                      | 1 |
| <i>circPTK2</i> | miR-548p                                                         | 3 |
| <i>circPTK2</i> | miR-548q                                                         | 6 |
| <i>circPTK2</i> | miR-548s                                                         | 2 |
| <i>circPTK2</i> | miR-550b-3p                                                      | 2 |
| <i>circPTK2</i> | miR-5571-3p                                                      | 1 |
| <i>circPTK2</i> | miR-558                                                          | 4 |
| <i>circPTK2</i> | miR-5582-3p                                                      | 2 |
| <i>circPTK2</i> | miR-5583-3p                                                      | 1 |
| <i>circPTK2</i> | miR-5584-3p                                                      | 1 |
| <i>circPTK2</i> | miR-5586-5p                                                      | 1 |
| <i>circPTK2</i> | miR-5587-5p                                                      | 1 |
| <i>circPTK2</i> | miR-5588-3p                                                      | 1 |
| <i>circPTK2</i> | miR-5589-5p                                                      | 1 |
| <i>circPTK2</i> | miR-5590-5p                                                      | 1 |
| <i>circPTK2</i> | miR-561-3p                                                       | 1 |
| <i>circPTK2</i> | miR-561-5p                                                       | 1 |
| <i>circPTK2</i> | miR-566                                                          | 1 |
| <i>circPTK2</i> | miR-567                                                          | 2 |
| <i>circPTK2</i> | miR-5680                                                         | 1 |
| <i>circPTK2</i> | miR-5681a                                                        | 1 |

|                 |                  |   |
|-----------------|------------------|---|
| <i>circPTK2</i> | miR-5690         | 2 |
| <i>circPTK2</i> | miR-5694         | 1 |
| <i>circPTK2</i> | miR-5695         | 1 |
| <i>circPTK2</i> | miR-5696         | 6 |
| <i>circPTK2</i> | miR-5697         | 7 |
| <i>circPTK2</i> | miR-5700         | 1 |
| <i>circPTK2</i> | miR-5701         | 3 |
| <i>circPTK2</i> | miR-5702         | 4 |
| <i>circPTK2</i> | miR-5704         | 1 |
| <i>circPTK2</i> | miR-5705         | 1 |
| <i>circPTK2</i> | miR-5707         | 1 |
| <i>circPTK2</i> | miR-576-3p       | 1 |
| <i>circPTK2</i> | miR-579-3p       | 6 |
| <i>circPTK2</i> | miR-580-5p       | 4 |
| <i>circPTK2</i> | miR-582-5p       | 5 |
| <i>circPTK2</i> | miR-583          | 1 |
| <i>circPTK2</i> | miR-584-3p       | 1 |
| <i>circPTK2</i> | miR-584-5p       | 1 |
| <i>circPTK2</i> | miR-585-3p       | 1 |
| <i>circPTK2</i> | miR-586          | 1 |
| <i>circPTK2</i> | miR-587          | 1 |
| <i>circPTK2</i> | miR-588          | 2 |
| <i>circPTK2</i> | miR-589-5p       | 2 |
| <i>circPTK2</i> | miR-590-3p       | 1 |
| <i>circPTK2</i> | miR-591          | 6 |
| <i>circPTK2</i> | miR-592          | 2 |
| <i>circPTK2</i> | miR-596          | 1 |
| <i>circPTK2</i> | miR-599          | 2 |
| <i>circPTK2</i> | miR-605-5p       | 1 |
| <i>circPTK2</i> | miR-607          | 1 |
| <i>circPTK2</i> | miR-6072/6891-3p | 3 |
| <i>circPTK2</i> | miR-6075         | 2 |
| <i>circPTK2</i> | miR-6077         | 2 |
| <i>circPTK2</i> | miR-6078         | 2 |
| <i>circPTK2</i> | miR-6079         | 2 |
| <i>circPTK2</i> | miR-6080         | 1 |
| <i>circPTK2</i> | miR-6083         | 2 |
| <i>circPTK2</i> | miR-6089         | 1 |

|                 |                                      |   |
|-----------------|--------------------------------------|---|
| <i>circPTK2</i> | miR-612/1285-3p/3187-5p/5189-5p/6860 | 1 |
| <i>circPTK2</i> | miR-6124                             | 2 |
| <i>circPTK2</i> | miR-6128                             | 1 |
| <i>circPTK2</i> | miR-6134                             | 2 |
| <i>circPTK2</i> | miR-616-3p                           | 9 |
| <i>circPTK2</i> | miR-6165                             | 1 |
| <i>circPTK2</i> | miR-619-3p                           | 1 |
| <i>circPTK2</i> | miR-627-3p                           | 1 |
| <i>circPTK2</i> | miR-627-5p                           | 1 |
| <i>circPTK2</i> | miR-628-3p                           | 1 |
| <i>circPTK2</i> | miR-632/4288                         | 3 |
| <i>circPTK2</i> | miR-637                              | 1 |
| <i>circPTK2</i> | miR-640                              | 7 |
| <i>circPTK2</i> | miR-642b-5p                          | 1 |
| <i>circPTK2</i> | miR-645                              | 1 |
| <i>circPTK2</i> | miR-6499-5p                          | 1 |
| <i>circPTK2</i> | miR-6500-3p                          | 4 |
| <i>circPTK2</i> | miR-6502-3p                          | 1 |
| <i>circPTK2</i> | miR-6504-3p                          | 1 |
| <i>circPTK2</i> | miR-6505-5p                          | 1 |
| <i>circPTK2</i> | miR-6507-5p                          | 2 |
| <i>circPTK2</i> | miR-651-3p                           | 7 |
| <i>circPTK2</i> | miR-651-5p                           | 3 |
| <i>circPTK2</i> | miR-6510-5p                          | 1 |
| <i>circPTK2</i> | miR-6511-3p                          | 1 |
| <i>circPTK2</i> | miR-6513-5p                          | 2 |
| <i>circPTK2</i> | miR-6514-5p                          | 4 |
| <i>circPTK2</i> | miR-6515-5p                          | 1 |
| <i>circPTK2</i> | miR-654-3p                           | 1 |
| <i>circPTK2</i> | miR-654-5p                           | 1 |
| <i>circPTK2</i> | miR-655-5p                           | 1 |
| <i>circPTK2</i> | miR-656-5p                           | 2 |
| <i>circPTK2</i> | miR-659-3p                           | 2 |
| <i>circPTK2</i> | miR-660-3p                           | 1 |
| <i>circPTK2</i> | miR-661                              | 1 |
| <i>circPTK2</i> | miR-664a-3p                          | 2 |
| <i>circPTK2</i> | miR-668-5p                           | 1 |
| <i>circPTK2</i> | miR-670-5p                           | 1 |



|                 |                       |   |
|-----------------|-----------------------|---|
| <i>circPTK2</i> | miR-6720-3p           | 1 |
| <i>circPTK2</i> | miR-6720-5p           | 2 |
| <i>circPTK2</i> | miR-6723-5p           | 1 |
| <i>circPTK2</i> | miR-6724-5p/6773-5p   | 1 |
| <i>circPTK2</i> | miR-6729-3p           | 1 |
| <i>circPTK2</i> | miR-6730-5p           | 1 |
| <i>circPTK2</i> | miR-6731-5p/8085      | 1 |
| <i>circPTK2</i> | miR-6733-3p           | 1 |
| <i>circPTK2</i> | miR-6736-3p           | 7 |
| <i>circPTK2</i> | miR-6739-3p           | 1 |
| <i>circPTK2</i> | miR-6740-5p           | 7 |
| <i>circPTK2</i> | miR-6742-3p           | 1 |
| <i>circPTK2</i> | miR-6746-3p           | 1 |
| <i>circPTK2</i> | miR-6746-5p           | 1 |
| <i>circPTK2</i> | miR-6748-3p           | 3 |
| <i>circPTK2</i> | miR-6749-3p           | 1 |
| <i>circPTK2</i> | miR-675-3p            | 7 |
| <i>circPTK2</i> | miR-675-5p/4466       | 1 |
| <i>circPTK2</i> | miR-6758-5p/6856-5p   | 4 |
| <i>circPTK2</i> | miR-6759-5p           | 1 |
| <i>circPTK2</i> | miR-676-3p            | 6 |
| <i>circPTK2</i> | miR-676-5p            | 2 |
| <i>circPTK2</i> | miR-6764-3p/6824-3p   | 2 |
| <i>circPTK2</i> | miR-6765-3p           | 1 |
| <i>circPTK2</i> | miR-6765-5p           | 1 |
| <i>circPTK2</i> | miR-6767-5p           | 1 |
| <i>circPTK2</i> | miR-6768-5p           | 3 |
| <i>circPTK2</i> | miR-6769a-3p          | 1 |
| <i>circPTK2</i> | miR-6769a-5p/6769b-5p | 1 |
| <i>circPTK2</i> | miR-6770-3p           | 1 |
| <i>circPTK2</i> | miR-6770-5p           | 1 |
| <i>circPTK2</i> | miR-6771-5p           | 1 |
| <i>circPTK2</i> | miR-6777-3p           | 1 |
| <i>circPTK2</i> | miR-6778-3p           | 1 |
| <i>circPTK2</i> | miR-6780a-3p          | 1 |
| <i>circPTK2</i> | miR-6784-3p/6862-3p   | 1 |
| <i>circPTK2</i> | miR-6786-5p           | 1 |
| <i>circPTK2</i> | miR-6787-3p           | 6 |

|                 |                     |   |
|-----------------|---------------------|---|
| <i>circPTK2</i> | miR-6789-3p         | 1 |
| <i>circPTK2</i> | miR-6791-3p/6829-3p | 1 |
| <i>circPTK2</i> | miR-6793-3p         | 1 |
| <i>circPTK2</i> | miR-6796-3p         | 3 |
| <i>circPTK2</i> | miR-6796-5p         | 1 |
| <i>circPTK2</i> | miR-6799-5p         | 2 |
| <i>circPTK2</i> | miR-6801-3p/6810-3p | 1 |
| <i>circPTK2</i> | miR-6809-3p         | 1 |
| <i>circPTK2</i> | miR-6810-5p         | 2 |
| <i>circPTK2</i> | miR-6811-3p         | 2 |
| <i>circPTK2</i> | miR-6815-5p/6865-5p | 1 |
| <i>circPTK2</i> | miR-6816-3p         | 1 |
| <i>circPTK2</i> | miR-6817-3p         | 1 |
| <i>circPTK2</i> | miR-6818-5p         | 1 |
| <i>circPTK2</i> | miR-6826-3p         | 2 |
| <i>circPTK2</i> | miR-6830-5p         | 1 |
| <i>circPTK2</i> | miR-6836-3p         | 1 |
| <i>circPTK2</i> | miR-6840-3p         | 4 |
| <i>circPTK2</i> | miR-6844            | 6 |
| <i>circPTK2</i> | miR-6846-3p         | 2 |
| <i>circPTK2</i> | miR-6847-5p         | 1 |
| <i>circPTK2</i> | miR-6849-3p         | 3 |
| <i>circPTK2</i> | miR-6852-5p         | 1 |
| <i>circPTK2</i> | miR-6853-5p         | 1 |
| <i>circPTK2</i> | miR-6854-3p         | 1 |
| <i>circPTK2</i> | miR-6854-5p         | 4 |
| <i>circPTK2</i> | miR-6856-3p         | 1 |
| <i>circPTK2</i> | miR-6857-5p         | 2 |
| <i>circPTK2</i> | miR-6859-3p         | 2 |
| <i>circPTK2</i> | miR-6867-5p         | 2 |
| <i>circPTK2</i> | miR-6868-3p         | 1 |
| <i>circPTK2</i> | miR-6868-5p         | 1 |
| <i>circPTK2</i> | miR-6873-3p         | 1 |
| <i>circPTK2</i> | miR-6874-5p         | 3 |
| <i>circPTK2</i> | miR-6878-5p         | 1 |
| <i>circPTK2</i> | miR-6880-5p         | 1 |
| <i>circPTK2</i> | miR-6881-3p         | 1 |
| <i>circPTK2</i> | miR-6882-3p         | 1 |

|                 |             |   |
|-----------------|-------------|---|
| <i>circPTK2</i> | miR-6885-3p | 1 |
| <i>circPTK2</i> | miR-6886-5p | 1 |
| <i>circPTK2</i> | miR-6888-5p | 5 |
| <i>circPTK2</i> | miR-6889-3p | 3 |
| <i>circPTK2</i> | miR-6890-3p | 1 |
| <i>circPTK2</i> | miR-6890-5p | 1 |
| <i>circPTK2</i> | miR-6892-3p | 1 |
| <i>circPTK2</i> | miR-7-5p    | 2 |
| <i>circPTK2</i> | miR-708-3p  | 2 |
| <i>circPTK2</i> | miR-7106-3p | 1 |
| <i>circPTK2</i> | miR-7106-5p | 2 |
| <i>circPTK2</i> | miR-7109-3p | 1 |
| <i>circPTK2</i> | miR-7110-3p | 1 |
| <i>circPTK2</i> | miR-7111-3p | 1 |
| <i>circPTK2</i> | miR-7112-3p | 1 |
| <i>circPTK2</i> | miR-7113-3p | 1 |
| <i>circPTK2</i> | miR-7150    | 1 |
| <i>circPTK2</i> | miR-7153-3p | 1 |
| <i>circPTK2</i> | miR-7154-5p | 1 |
| <i>circPTK2</i> | miR-7155-5p | 1 |
| <i>circPTK2</i> | miR-7158-3p | 2 |
| <i>circPTK2</i> | miR-7160-5p | 4 |
| <i>circPTK2</i> | miR-7162-3p | 7 |
| <i>circPTK2</i> | miR-758-3p  | 3 |
| <i>circPTK2</i> | miR-759     | 1 |
| <i>circPTK2</i> | miR-766-3p  | 2 |
| <i>circPTK2</i> | miR-767-3p  | 3 |
| <i>circPTK2</i> | miR-769-5p  | 1 |
| <i>circPTK2</i> | miR-7703    | 2 |
| <i>circPTK2</i> | miR-7843-3p | 4 |
| <i>circPTK2</i> | miR-7844-5p | 1 |
| <i>circPTK2</i> | miR-7847-3p | 1 |
| <i>circPTK2</i> | miR-7848-3p | 1 |
| <i>circPTK2</i> | miR-7850-5p | 8 |
| <i>circPTK2</i> | miR-7851-3p | 1 |
| <i>circPTK2</i> | miR-7854-3p | 2 |
| <i>circPTK2</i> | miR-7855-5p | 2 |
| <i>circPTK2</i> | miR-7975    | 1 |

|                 |                         |   |
|-----------------|-------------------------|---|
| <i>circPTK2</i> | miR-7977                | 2 |
| <i>circPTK2</i> | miR-7978                | 6 |
| <i>circPTK2</i> | miR-802                 | 1 |
| <i>circPTK2</i> | miR-8057                | 2 |
| <i>circPTK2</i> | miR-8062                | 1 |
| <i>circPTK2</i> | miR-8064                | 3 |
| <i>circPTK2</i> | miR-8068                | 2 |
| <i>circPTK2</i> | miR-8070                | 1 |
| <i>circPTK2</i> | miR-8071                | 1 |
| <i>circPTK2</i> | miR-8075                | 3 |
| <i>circPTK2</i> | miR-8076                | 3 |
| <i>circPTK2</i> | miR-8077                | 4 |
| <i>circPTK2</i> | miR-8080                | 1 |
| <i>circPTK2</i> | miR-8086                | 1 |
| <i>circPTK2</i> | miR-873-3p              | 3 |
| <i>circPTK2</i> | miR-873-5p.1            | 1 |
| <i>circPTK2</i> | miR-873-5p.2            | 1 |
| <i>circPTK2</i> | miR-875-3p              | 5 |
| <i>circPTK2</i> | miR-875-5p              | 1 |
| <i>circPTK2</i> | miR-876-3p              | 1 |
| <i>circPTK2</i> | miR-876-5p              | 1 |
| <i>circPTK2</i> | miR-877-3p              | 4 |
| <i>circPTK2</i> | miR-885-3p              | 1 |
| <i>circPTK2</i> | miR-885-5p              | 1 |
| <i>circPTK2</i> | miR-887-5p              | 2 |
| <i>circPTK2</i> | miR-889-5p              | 1 |
| <i>circPTK2</i> | miR-890                 | 3 |
| <i>circPTK2</i> | miR-892a                | 1 |
| <i>circPTK2</i> | miR-9-3p                | 2 |
| <i>circPTK2</i> | miR-9-5p                | 4 |
| <i>circPTK2</i> | miR-921                 | 1 |
| <i>circPTK2</i> | miR-922                 | 1 |
| <i>circPTK2</i> | miR-92a-2-5p            | 1 |
| <i>circPTK2</i> | miR-937-5p              | 1 |
| <i>circPTK2</i> | miR-939-3p              | 1 |
| <i>circPTK2</i> | miR-940/6808-5p/6893-5p | 1 |
| <i>circPTK2</i> | miR-942-5p              | 1 |
| <i>circPTK2</i> | miR-95-5p               | 1 |

|                   |                             |   |
|-------------------|-----------------------------|---|
| <i>circPTK2</i>   | miR-96-3p                   | 4 |
| <i>circPTK2</i>   | miR-99-3p                   | 3 |
| <i>circPTK2</i>   | miR-15a-3p                  | 1 |
| <i>circPTK2</i>   | miR-1972                    | 1 |
| <i>circPTK2</i>   | miR-2115-5p                 | 1 |
| <i>circPTK2</i>   | miR-27b-5p                  | 1 |
| <i>circPTK2</i>   | miR-4529-5p                 | 1 |
| <i>circPTK2</i>   | miR-4650-5p                 | 1 |
| <i>circPTK2</i>   | miR-516a-3p/516b-3p/7162-5p | 1 |
| <i>circPTK2</i>   | miR-6501-3p                 | 1 |
| <i>circPTPN13</i> | let-7a-2-3p/let-7g-3p       | 1 |
| <i>circPTPN13</i> | let-7c-3p                   | 1 |
| <i>circPTPN13</i> | miR-100-3p                  | 2 |
| <i>circPTPN13</i> | miR-101-3p.2                | 1 |
| <i>circPTPN13</i> | miR-103-3p/107              | 2 |
| <i>circPTPN13</i> | miR-103a-2-5p               | 1 |
| <i>circPTPN13</i> | miR-106b-3p                 | 1 |
| <i>circPTPN13</i> | miR-10b-3p                  | 1 |
| <i>circPTPN13</i> | miR-1179                    | 1 |
| <i>circPTPN13</i> | miR-1200                    | 2 |
| <i>circPTPN13</i> | miR-1202/3972               | 1 |
| <i>circPTPN13</i> | miR-1207-3p                 | 1 |
| <i>circPTPN13</i> | miR-1207-5p/4763-3p         | 1 |
| <i>circPTPN13</i> | miR-1208                    | 3 |
| <i>circPTPN13</i> | miR-1224-5p                 | 3 |
| <i>circPTPN13</i> | miR-1226-5p                 | 3 |
| <i>circPTPN13</i> | miR-1233-5p/6778-5p         | 1 |
| <i>circPTPN13</i> | miR-1234-3p/7107-5p         | 1 |
| <i>circPTPN13</i> | miR-1237-3p                 | 2 |
| <i>circPTPN13</i> | miR-1238-3p                 | 1 |
| <i>circPTPN13</i> | miR-1243                    | 1 |
| <i>circPTPN13</i> | miR-1244                    | 1 |
| <i>circPTPN13</i> | miR-1245b-3p                | 2 |
| <i>circPTPN13</i> | miR-1246                    | 2 |
| <i>circPTPN13</i> | miR-1247-3p                 | 1 |
| <i>circPTPN13</i> | miR-1248                    | 2 |
| <i>circPTPN13</i> | miR-1250-3p                 | 2 |
| <i>circPTPN13</i> | miR-1251-5p                 | 1 |

|                   |                     |   |
|-------------------|---------------------|---|
| <i>circPTPN13</i> | miR-1252-3p         | 3 |
| <i>circPTPN13</i> | miR-1253            | 4 |
| <i>circPTPN13</i> | miR-1254/3116       | 1 |
| <i>circPTPN13</i> | miR-1255a/1255b-5p  | 1 |
| <i>circPTPN13</i> | miR-1257            | 1 |
| <i>circPTPN13</i> | miR-1261            | 1 |
| <i>circPTPN13</i> | miR-1264            | 1 |
| <i>circPTPN13</i> | miR-1266-3p         | 2 |
| <i>circPTPN13</i> | miR-1266-5p/4518    | 1 |
| <i>circPTPN13</i> | miR-1267            | 3 |
| <i>circPTPN13</i> | miR-127-5p          | 2 |
| <i>circPTPN13</i> | miR-1270            | 2 |
| <i>circPTPN13</i> | miR-1272            | 1 |
| <i>circPTPN13</i> | miR-1273f           | 2 |
| <i>circPTPN13</i> | miR-1273g-5p        | 1 |
| <i>circPTPN13</i> | miR-1273h-3p        | 2 |
| <i>circPTPN13</i> | miR-1276            | 1 |
| <i>circPTPN13</i> | miR-1277-3p         | 1 |
| <i>circPTPN13</i> | miR-1277-5p         | 2 |
| <i>circPTPN13</i> | miR-128-3p          | 1 |
| <i>circPTPN13</i> | miR-1283            | 1 |
| <i>circPTPN13</i> | miR-1284            | 1 |
| <i>circPTPN13</i> | miR-1288-5p         | 3 |
| <i>circPTPN13</i> | miR-129-3p          | 1 |
| <i>circPTPN13</i> | miR-1292-5p         | 1 |
| <i>circPTPN13</i> | miR-1296-5p         | 1 |
| <i>circPTPN13</i> | miR-1298-3p         | 1 |
| <i>circPTPN13</i> | miR-1298-5p         | 1 |
| <i>circPTPN13</i> | miR-1301-5p/6502-5p | 1 |
| <i>circPTPN13</i> | miR-1302/4298       | 1 |
| <i>circPTPN13</i> | miR-1304-5p         | 1 |
| <i>circPTPN13</i> | miR-1305            | 2 |
| <i>circPTPN13</i> | miR-1322            | 1 |
| <i>circPTPN13</i> | miR-1323            | 1 |
| <i>circPTPN13</i> | miR-134-3p          | 2 |
| <i>circPTPN13</i> | miR-134-5p          | 1 |
| <i>circPTPN13</i> | miR-1343-3p         | 2 |
| <i>circPTPN13</i> | miR-135-5p          | 1 |

|                   |                                     |   |
|-------------------|-------------------------------------|---|
| <i>circPTPN13</i> | miR-135a-3p                         | 1 |
| <i>circPTPN13</i> | miR-136-5p                          | 2 |
| <i>circPTPN13</i> | miR-137                             | 1 |
| <i>circPTPN13</i> | miR-140-5p                          | 1 |
| <i>circPTPN13</i> | miR-141-3p/200-3p                   | 2 |
| <i>circPTPN13</i> | miR-141-5p                          | 1 |
| <i>circPTPN13</i> | miR-143-3p                          | 2 |
| <i>circPTPN13</i> | miR-143-5p                          | 1 |
| <i>circPTPN13</i> | miR-144-5p                          | 2 |
| <i>circPTPN13</i> | miR-145-3p                          | 2 |
| <i>circPTPN13</i> | miR-147a                            | 1 |
| <i>circPTPN13</i> | miR-149-5p                          | 1 |
| <i>circPTPN13</i> | miR-1537-5p                         | 1 |
| <i>circPTPN13</i> | miR-155-3p                          | 1 |
| <i>circPTPN13</i> | miR-16-1-3p                         | 2 |
| <i>circPTPN13</i> | miR-17-5p/20-5p/93-5p/106-5p/519-3p | 1 |
| <i>circPTPN13</i> | miR-181-3p/4420                     | 1 |
| <i>circPTPN13</i> | miR-181-5p                          | 4 |
| <i>circPTPN13</i> | miR-1827                            | 1 |
| <i>circPTPN13</i> | miR-183-5p.1                        | 1 |
| <i>circPTPN13</i> | miR-185-3p                          | 1 |
| <i>circPTPN13</i> | miR-185-5p                          | 1 |
| <i>circPTPN13</i> | miR-186-3p                          | 1 |
| <i>circPTPN13</i> | miR-19-3p                           | 1 |
| <i>circPTPN13</i> | miR-19-5p                           | 1 |
| <i>circPTPN13</i> | miR-190-5p                          | 1 |
| <i>circPTPN13</i> | miR-1909-3p/6722-3p                 | 1 |
| <i>circPTPN13</i> | miR-190a-3p                         | 2 |
| <i>circPTPN13</i> | miR-1910-5p                         | 1 |
| <i>circPTPN13</i> | miR-1914-5p                         | 1 |
| <i>circPTPN13</i> | miR-193b-5p                         | 1 |
| <i>circPTPN13</i> | miR-194-3p                          | 1 |
| <i>circPTPN13</i> | miR-196-5p                          | 1 |
| <i>circPTPN13</i> | miR-196a-3p                         | 1 |
| <i>circPTPN13</i> | miR-1976                            | 1 |
| <i>circPTPN13</i> | miR-198                             | 2 |
| <i>circPTPN13</i> | miR-202-5p                          | 2 |
| <i>circPTPN13</i> | miR-203a-3p.1                       | 2 |

|                   |                     |   |
|-------------------|---------------------|---|
| <i>circPTPN13</i> | miR-203a-5p         | 1 |
| <i>circPTPN13</i> | miR-203b-3p         | 1 |
| <i>circPTPN13</i> | miR-203b-5p/6718-5p | 1 |
| <i>circPTPN13</i> | miR-204-5p/211-5p   | 1 |
| <i>circPTPN13</i> | miR-205-5p          | 1 |
| <i>circPTPN13</i> | miR-2052            | 1 |
| <i>circPTPN13</i> | miR-2053            | 1 |
| <i>circPTPN13</i> | miR-208-5p          | 1 |
| <i>circPTPN13</i> | miR-21-5p/590-5p    | 2 |
| <i>circPTPN13</i> | miR-211-3p          | 1 |
| <i>circPTPN13</i> | miR-2110            | 1 |
| <i>circPTPN13</i> | miR-2115-3p         | 2 |
| <i>circPTPN13</i> | miR-2115-5p         | 1 |
| <i>circPTPN13</i> | miR-214-3p/3619-5p  | 2 |
| <i>circPTPN13</i> | miR-214-5p          | 1 |
| <i>circPTPN13</i> | miR-215-3p          | 1 |
| <i>circPTPN13</i> | miR-217             | 1 |
| <i>circPTPN13</i> | miR-22-3p           | 1 |
| <i>circPTPN13</i> | miR-221-5p/8073     | 2 |
| <i>circPTPN13</i> | miR-223-5p          | 4 |
| <i>circPTPN13</i> | miR-224-5p          | 1 |
| <i>circPTPN13</i> | miR-2276-3p         | 1 |
| <i>circPTPN13</i> | miR-2278            | 1 |
| <i>circPTPN13</i> | miR-2392            | 2 |
| <i>circPTPN13</i> | miR-2467-3p         | 1 |
| <i>circPTPN13</i> | miR-2467-5p         | 1 |
| <i>circPTPN13</i> | miR-26-3p           | 1 |
| <i>circPTPN13</i> | miR-2681-5p         | 1 |
| <i>circPTPN13</i> | miR-2682-3p/6781-3p | 1 |
| <i>circPTPN13</i> | miR-27b-5p          | 1 |
| <i>circPTPN13</i> | miR-28-3p           | 1 |
| <i>circPTPN13</i> | miR-2861            | 1 |
| <i>circPTPN13</i> | miR-297             | 2 |
| <i>circPTPN13</i> | miR-298             | 3 |
| <i>circPTPN13</i> | miR-299-3p          | 3 |
| <i>circPTPN13</i> | miR-29a-5p          | 2 |
| <i>circPTPN13</i> | miR-29b-1-5p        | 2 |
| <i>circPTPN13</i> | miR-29b-2-5p        | 1 |



|                   |                          |   |
|-------------------|--------------------------|---|
| <i>circPTPN13</i> | miR-30-3p                | 2 |
| <i>circPTPN13</i> | miR-301a-5p/301b-5p      | 1 |
| <i>circPTPN13</i> | miR-302f                 | 1 |
| <i>circPTPN13</i> | miR-3065-3p              | 1 |
| <i>circPTPN13</i> | miR-3065-5p              | 1 |
| <i>circPTPN13</i> | miR-3074-5p              | 2 |
| <i>circPTPN13</i> | miR-3119                 | 2 |
| <i>circPTPN13</i> | miR-3120-3p              | 1 |
| <i>circPTPN13</i> | miR-3121-5p              | 2 |
| <i>circPTPN13</i> | miR-3122/3913-5p         | 2 |
| <i>circPTPN13</i> | miR-3123                 | 4 |
| <i>circPTPN13</i> | miR-3126-3p              | 1 |
| <i>circPTPN13</i> | miR-3126-5p              | 3 |
| <i>circPTPN13</i> | miR-3127-5p              | 1 |
| <i>circPTPN13</i> | miR-3128                 | 2 |
| <i>circPTPN13</i> | miR-3129-3p/5583-5p      | 1 |
| <i>circPTPN13</i> | miR-3134                 | 1 |
| <i>circPTPN13</i> | miR-3136-5p/4439         | 1 |
| <i>circPTPN13</i> | miR-3140-3p              | 2 |
| <i>circPTPN13</i> | miR-3140-5p              | 2 |
| <i>circPTPN13</i> | miR-3143                 | 1 |
| <i>circPTPN13</i> | miR-3145-3p              | 1 |
| <i>circPTPN13</i> | miR-3145-5p              | 2 |
| <i>circPTPN13</i> | miR-3148                 | 2 |
| <i>circPTPN13</i> | miR-3149                 | 1 |
| <i>circPTPN13</i> | miR-3150a-3p             | 1 |
| <i>circPTPN13</i> | miR-3150a-5p/3150b-5p    | 2 |
| <i>circPTPN13</i> | miR-3150b-3p             | 1 |
| <i>circPTPN13</i> | miR-3151-3p              | 1 |
| <i>circPTPN13</i> | miR-3152-5p              | 1 |
| <i>circPTPN13</i> | miR-3153/6733-5p/6739-5p | 4 |
| <i>circPTPN13</i> | miR-3154                 | 2 |
| <i>circPTPN13</i> | miR-3156-5p              | 2 |
| <i>circPTPN13</i> | miR-3157-5p              | 1 |
| <i>circPTPN13</i> | miR-3160-3p              | 1 |
| <i>circPTPN13</i> | miR-3161                 | 2 |
| <i>circPTPN13</i> | miR-3162-3p              | 1 |
| <i>circPTPN13</i> | miR-3163                 | 3 |

|                   |                   |   |
|-------------------|-------------------|---|
| <i>circPTPN13</i> | miR-3164          | 1 |
| <i>circPTPN13</i> | miR-3169          | 1 |
| <i>circPTPN13</i> | miR-3175          | 1 |
| <i>circPTPN13</i> | miR-3179          | 1 |
| <i>circPTPN13</i> | miR-3184-3p       | 1 |
| <i>circPTPN13</i> | miR-3185          | 2 |
| <i>circPTPN13</i> | miR-3188          | 1 |
| <i>circPTPN13</i> | miR-3191-5p       | 1 |
| <i>circPTPN13</i> | miR-3192-3p       | 3 |
| <i>circPTPN13</i> | miR-3194-3p       | 1 |
| <i>circPTPN13</i> | miR-3199/8052     | 1 |
| <i>circPTPN13</i> | miR-320           | 1 |
| <i>circPTPN13</i> | miR-3200-5p       | 4 |
| <i>circPTPN13</i> | miR-320e          | 3 |
| <i>circPTPN13</i> | miR-323a-5p       | 1 |
| <i>circPTPN13</i> | miR-323b-3p       | 1 |
| <i>circPTPN13</i> | miR-324-5p        | 1 |
| <i>circPTPN13</i> | miR-325           | 1 |
| <i>circPTPN13</i> | miR-326           | 1 |
| <i>circPTPN13</i> | miR-329-3p/362-3p | 1 |
| <i>circPTPN13</i> | miR-330-3p        | 2 |
| <i>circPTPN13</i> | miR-330-3p.2      | 3 |
| <i>circPTPN13</i> | miR-331-5p        | 1 |
| <i>circPTPN13</i> | miR-335-3p        | 4 |
| <i>circPTPN13</i> | miR-335-5p        | 2 |
| <i>circPTPN13</i> | miR-338-3p        | 1 |
| <i>circPTPN13</i> | miR-34-5p/449-5p  | 2 |
| <i>circPTPN13</i> | miR-340-5p        | 1 |
| <i>circPTPN13</i> | miR-342-3p        | 2 |
| <i>circPTPN13</i> | miR-345-3p        | 2 |
| <i>circPTPN13</i> | miR-34a-3p        | 1 |
| <i>circPTPN13</i> | miR-3591-5p       | 1 |
| <i>circPTPN13</i> | miR-3606-5p       | 1 |
| <i>circPTPN13</i> | miR-3607-3p       | 1 |
| <i>circPTPN13</i> | miR-361-3p        | 1 |
| <i>circPTPN13</i> | miR-3612          | 1 |
| <i>circPTPN13</i> | miR-3613-3p       | 1 |
| <i>circPTPN13</i> | miR-3614-3p       | 1 |

|                   |                                   |   |
|-------------------|-----------------------------------|---|
| <i>circPTPN13</i> | miR-3614-5p                       | 1 |
| <i>circPTPN13</i> | miR-3615                          | 1 |
| <i>circPTPN13</i> | miR-3616-3p                       | 1 |
| <i>circPTPN13</i> | miR-3617-3p                       | 1 |
| <i>circPTPN13</i> | miR-3619-3p                       | 1 |
| <i>circPTPN13</i> | miR-362-5p/500b-5p                | 1 |
| <i>circPTPN13</i> | miR-3622a-5p                      | 1 |
| <i>circPTPN13</i> | miR-3646                          | 3 |
| <i>circPTPN13</i> | miR-3649                          | 1 |
| <i>circPTPN13</i> | miR-365-3p                        | 1 |
| <i>circPTPN13</i> | miR-3651                          | 1 |
| <i>circPTPN13</i> | miR-3653-3p                       | 1 |
| <i>circPTPN13</i> | miR-3653-5p                       | 1 |
| <i>circPTPN13</i> | miR-3654                          | 1 |
| <i>circPTPN13</i> | miR-3658                          | 2 |
| <i>circPTPN13</i> | miR-3659                          | 1 |
| <i>circPTPN13</i> | miR-365a-5p/365b-5p               | 1 |
| <i>circPTPN13</i> | miR-3660/4526                     | 2 |
| <i>circPTPN13</i> | miR-3662                          | 3 |
| <i>circPTPN13</i> | miR-3664-3p                       | 1 |
| <i>circPTPN13</i> | miR-367-5p                        | 3 |
| <i>circPTPN13</i> | miR-3671                          | 1 |
| <i>circPTPN13</i> | miR-3678-3p                       | 2 |
| <i>circPTPN13</i> | miR-3681-5p                       | 2 |
| <i>circPTPN13</i> | miR-3682-3p                       | 2 |
| <i>circPTPN13</i> | miR-3682-5p                       | 2 |
| <i>circPTPN13</i> | miR-3685                          | 2 |
| <i>circPTPN13</i> | miR-3686                          | 2 |
| <i>circPTPN13</i> | miR-3688-5p                       | 2 |
| <i>circPTPN13</i> | miR-3689a-5p/3689b-5p/3689e/3689f | 1 |
| <i>circPTPN13</i> | miR-3689d/6851-5p                 | 2 |
| <i>circPTPN13</i> | miR-3690                          | 1 |
| <i>circPTPN13</i> | miR-3691-3p                       | 1 |
| <i>circPTPN13</i> | miR-3691-5p                       | 1 |
| <i>circPTPN13</i> | miR-374a-3p                       | 2 |
| <i>circPTPN13</i> | miR-375                           | 4 |
| <i>circPTPN13</i> | miR-376a-2-5p                     | 1 |
| <i>circPTPN13</i> | miR-376a-5p                       | 1 |

|                   |                     |   |
|-------------------|---------------------|---|
| <i>circPTPN13</i> | miR-376b-5p/376c-5p | 1 |
| <i>circPTPN13</i> | miR-377-3p          | 3 |
| <i>circPTPN13</i> | miR-378a-5p         | 2 |
| <i>circPTPN13</i> | miR-378g            | 1 |
| <i>circPTPN13</i> | miR-378j/6839-5p    | 1 |
| <i>circPTPN13</i> | miR-381-3p          | 1 |
| <i>circPTPN13</i> | miR-383-3p          | 1 |
| <i>circPTPN13</i> | miR-383-5p.1        | 2 |
| <i>circPTPN13</i> | miR-383-5p.2        | 2 |
| <i>circPTPN13</i> | miR-384             | 2 |
| <i>circPTPN13</i> | miR-3911            | 1 |
| <i>circPTPN13</i> | miR-3913-3p         | 2 |
| <i>circPTPN13</i> | miR-3915            | 3 |
| <i>circPTPN13</i> | miR-3917            | 1 |
| <i>circPTPN13</i> | miR-3919            | 1 |
| <i>circPTPN13</i> | miR-3920            | 3 |
| <i>circPTPN13</i> | miR-3921/4653-5p    | 1 |
| <i>circPTPN13</i> | miR-3922-5p         | 1 |
| <i>circPTPN13</i> | miR-3923            | 1 |
| <i>circPTPN13</i> | miR-3925-3p         | 2 |
| <i>circPTPN13</i> | miR-3925-5p         | 4 |
| <i>circPTPN13</i> | miR-3926            | 1 |
| <i>circPTPN13</i> | miR-3927-3p/6831-5p | 1 |
| <i>circPTPN13</i> | miR-3928-3p         | 2 |
| <i>circPTPN13</i> | miR-3936            | 1 |
| <i>circPTPN13</i> | miR-3938            | 1 |
| <i>circPTPN13</i> | miR-3940-5p/4507    | 1 |
| <i>circPTPN13</i> | miR-3942-3p         | 1 |
| <i>circPTPN13</i> | miR-3943            | 1 |
| <i>circPTPN13</i> | miR-3944-5p         | 2 |
| <i>circPTPN13</i> | miR-3974            | 1 |
| <i>circPTPN13</i> | miR-3975            | 1 |
| <i>circPTPN13</i> | miR-3978            | 1 |
| <i>circPTPN13</i> | miR-410-3p          | 1 |
| <i>circPTPN13</i> | miR-411-3p          | 1 |
| <i>circPTPN13</i> | miR-411-5p.1        | 1 |
| <i>circPTPN13</i> | miR-412-3p/6754-3p  | 2 |
| <i>circPTPN13</i> | miR-421             | 2 |

|                   |                                    |   |
|-------------------|------------------------------------|---|
| <i>circPTPN13</i> | miR-425-5p                         | 3 |
| <i>circPTPN13</i> | miR-4251                           | 1 |
| <i>circPTPN13</i> | miR-4252                           | 1 |
| <i>circPTPN13</i> | miR-4254                           | 1 |
| <i>circPTPN13</i> | miR-4255                           | 2 |
| <i>circPTPN13</i> | miR-4256                           | 1 |
| <i>circPTPN13</i> | miR-4257                           | 1 |
| <i>circPTPN13</i> | miR-4260                           | 1 |
| <i>circPTPN13</i> | miR-4265/4296/4322                 | 2 |
| <i>circPTPN13</i> | miR-4266                           | 2 |
| <i>circPTPN13</i> | miR-4270/4441/6754-5p              | 2 |
| <i>circPTPN13</i> | miR-4271/4725-3p/6780b-5p          | 1 |
| <i>circPTPN13</i> | miR-4274                           | 3 |
| <i>circPTPN13</i> | miR-4279                           | 1 |
| <i>circPTPN13</i> | miR-4292/6791-5p                   | 1 |
| <i>circPTPN13</i> | miR-4293                           | 1 |
| <i>circPTPN13</i> | miR-4299                           | 1 |
| <i>circPTPN13</i> | miR-4302                           | 2 |
| <i>circPTPN13</i> | miR-4303                           | 5 |
| <i>circPTPN13</i> | miR-4308                           | 1 |
| <i>circPTPN13</i> | miR-431-5p                         | 1 |
| <i>circPTPN13</i> | miR-4311                           | 1 |
| <i>circPTPN13</i> | miR-4313                           | 1 |
| <i>circPTPN13</i> | miR-4314                           | 1 |
| <i>circPTPN13</i> | miR-4318                           | 2 |
| <i>circPTPN13</i> | miR-432-3p                         | 2 |
| <i>circPTPN13</i> | miR-4320                           | 3 |
| <i>circPTPN13</i> | miR-4323                           | 1 |
| <i>circPTPN13</i> | miR-4328                           | 1 |
| <i>circPTPN13</i> | miR-4329                           | 1 |
| <i>circPTPN13</i> | miR-4330                           | 1 |
| <i>circPTPN13</i> | miR-4417                           | 3 |
| <i>circPTPN13</i> | miR-4419a/4510/6127/6129/6130/6133 | 3 |
| <i>circPTPN13</i> | miR-4422                           | 3 |
| <i>circPTPN13</i> | miR-4426/4647/4662b                | 1 |
| <i>circPTPN13</i> | miR-4433a-5p                       | 1 |
| <i>circPTPN13</i> | miR-4433b-3p                       | 1 |
| <i>circPTPN13</i> | miR-4433b-5p                       | 1 |

|                   |                                              |   |
|-------------------|----------------------------------------------|---|
| <i>circPTPN13</i> | miR-4434/4516/5703                           | 3 |
| <i>circPTPN13</i> | miR-4436b-3p/4632-5p/6735-5p/6879-5p/7843-5p | 7 |
| <i>circPTPN13</i> | miR-4443                                     | 1 |
| <i>circPTPN13</i> | miR-4444                                     | 1 |
| <i>circPTPN13</i> | miR-4446-5p                                  | 2 |
| <i>circPTPN13</i> | miR-4456                                     | 1 |
| <i>circPTPN13</i> | miR-4464/4748                                | 2 |
| <i>circPTPN13</i> | miR-4468                                     | 1 |
| <i>circPTPN13</i> | miR-4470                                     | 1 |
| <i>circPTPN13</i> | miR-4471/8059                                | 1 |
| <i>circPTPN13</i> | miR-4474-3p                                  | 2 |
| <i>circPTPN13</i> | miR-4475                                     | 1 |
| <i>circPTPN13</i> | miR-4476/6876-5p                             | 2 |
| <i>circPTPN13</i> | miR-4480                                     | 1 |
| <i>circPTPN13</i> | miR-4481/4745-5p                             | 1 |
| <i>circPTPN13</i> | miR-4486                                     | 1 |
| <i>circPTPN13</i> | miR-4487                                     | 1 |
| <i>circPTPN13</i> | miR-4490                                     | 1 |
| <i>circPTPN13</i> | miR-4491/4657                                | 3 |
| <i>circPTPN13</i> | miR-4496                                     | 2 |
| <i>circPTPN13</i> | miR-4502                                     | 1 |
| <i>circPTPN13</i> | miR-4504                                     | 3 |
| <i>circPTPN13</i> | miR-4506                                     | 1 |
| <i>circPTPN13</i> | miR-450a-1-3p                                | 2 |
| <i>circPTPN13</i> | miR-450a-2-3p                                | 1 |
| <i>circPTPN13</i> | miR-450b-3p/769-3p                           | 1 |
| <i>circPTPN13</i> | miR-4511                                     | 3 |
| <i>circPTPN13</i> | miR-4512                                     | 1 |
| <i>circPTPN13</i> | miR-4513/6855-3p                             | 1 |
| <i>circPTPN13</i> | miR-4519                                     | 3 |
| <i>circPTPN13</i> | miR-452-3p                                   | 2 |
| <i>circPTPN13</i> | miR-452-5p/892-3p                            | 2 |
| <i>circPTPN13</i> | miR-4520-3p                                  | 1 |
| <i>circPTPN13</i> | miR-4521                                     | 1 |
| <i>circPTPN13</i> | miR-4524-5p                                  | 1 |
| <i>circPTPN13</i> | miR-4527/6503-5p                             | 1 |
| <i>circPTPN13</i> | miR-4530                                     | 1 |
| <i>circPTPN13</i> | miR-4531                                     | 2 |

|                   |                       |   |
|-------------------|-----------------------|---|
| <i>circPTPN13</i> | miR-4534/8082         | 1 |
| <i>circPTPN13</i> | miR-4536-5p           | 1 |
| <i>circPTPN13</i> | miR-455-3p.1          | 1 |
| <i>circPTPN13</i> | miR-455-3p.2          | 1 |
| <i>circPTPN13</i> | miR-4633-3p/6500-5p   | 1 |
| <i>circPTPN13</i> | miR-4635              | 1 |
| <i>circPTPN13</i> | miR-4640-5p           | 2 |
| <i>circPTPN13</i> | miR-4643              | 2 |
| <i>circPTPN13</i> | miR-4648              | 1 |
| <i>circPTPN13</i> | miR-4649-3p           | 4 |
| <i>circPTPN13</i> | miR-4654/4769-5p      | 1 |
| <i>circPTPN13</i> | miR-4659a-3p/4659b-3p | 3 |
| <i>circPTPN13</i> | miR-466               | 1 |
| <i>circPTPN13</i> | miR-4662a-3p          | 2 |
| <i>circPTPN13</i> | miR-4663              | 1 |
| <i>circPTPN13</i> | miR-4665-3p           | 1 |
| <i>circPTPN13</i> | miR-4666a-3p          | 1 |
| <i>circPTPN13</i> | miR-4668-3p           | 1 |
| <i>circPTPN13</i> | miR-4668-5p           | 4 |
| <i>circPTPN13</i> | miR-4670-3p           | 2 |
| <i>circPTPN13</i> | miR-4680-5p           | 1 |
| <i>circPTPN13</i> | miR-4682              | 1 |
| <i>circPTPN13</i> | miR-4685-5p/6837-5p   | 1 |
| <i>circPTPN13</i> | miR-4687-5p           | 1 |
| <i>circPTPN13</i> | miR-4689/6858-5p      | 3 |
| <i>circPTPN13</i> | miR-4690-3p/5685      | 1 |
| <i>circPTPN13</i> | miR-4691-3p           | 1 |
| <i>circPTPN13</i> | miR-4693-3p           | 2 |
| <i>circPTPN13</i> | miR-4694-3p           | 1 |
| <i>circPTPN13</i> | miR-4695-3p           | 3 |
| <i>circPTPN13</i> | miR-4695-5p           | 2 |
| <i>circPTPN13</i> | miR-4699-3p           | 1 |
| <i>circPTPN13</i> | miR-4699-5p           | 2 |
| <i>circPTPN13</i> | miR-4700-3p           | 1 |
| <i>circPTPN13</i> | miR-4703-3p           | 1 |
| <i>circPTPN13</i> | miR-4704-5p           | 2 |
| <i>circPTPN13</i> | miR-4708-3p           | 1 |
| <i>circPTPN13</i> | miR-4708-5p           | 2 |

|                   |                             |   |
|-------------------|-----------------------------|---|
| <i>circPTPN13</i> | miR-4709-3p                 | 3 |
| <i>circPTPN13</i> | miR-4709-5p                 | 1 |
| <i>circPTPN13</i> | miR-4712-3p                 | 1 |
| <i>circPTPN13</i> | miR-4718                    | 1 |
| <i>circPTPN13</i> | miR-4720-3p                 | 2 |
| <i>circPTPN13</i> | miR-4720-5p/4799-3p/5588-5p | 2 |
| <i>circPTPN13</i> | miR-4721                    | 1 |
| <i>circPTPN13</i> | miR-4724-3p                 | 2 |
| <i>circPTPN13</i> | miR-4724-5p                 | 1 |
| <i>circPTPN13</i> | miR-4728-3p                 | 2 |
| <i>circPTPN13</i> | miR-4729                    | 1 |
| <i>circPTPN13</i> | miR-4732-5p                 | 1 |
| <i>circPTPN13</i> | miR-4733-5p                 | 1 |
| <i>circPTPN13</i> | miR-4736                    | 1 |
| <i>circPTPN13</i> | miR-4738-3p                 | 1 |
| <i>circPTPN13</i> | miR-4739                    | 1 |
| <i>circPTPN13</i> | miR-4746-5p                 | 1 |
| <i>circPTPN13</i> | miR-4752                    | 1 |
| <i>circPTPN13</i> | miR-4755-3p                 | 1 |
| <i>circPTPN13</i> | miR-4755-5p/5006-3p         | 3 |
| <i>circPTPN13</i> | miR-4756-3p                 | 1 |
| <i>circPTPN13</i> | miR-4757-5p/6744-3p         | 1 |
| <i>circPTPN13</i> | miR-4759                    | 1 |
| <i>circPTPN13</i> | miR-4761-3p                 | 2 |
| <i>circPTPN13</i> | miR-4762-3p                 | 2 |
| <i>circPTPN13</i> | miR-4766-5p                 | 1 |
| <i>circPTPN13</i> | miR-4772-3p                 | 1 |
| <i>circPTPN13</i> | miR-4772-5p                 | 2 |
| <i>circPTPN13</i> | miR-4773                    | 2 |
| <i>circPTPN13</i> | miR-4774-3p                 | 1 |
| <i>circPTPN13</i> | miR-4774-5p                 | 1 |
| <i>circPTPN13</i> | miR-4777-5p                 | 2 |
| <i>circPTPN13</i> | miR-4778-3p                 | 3 |
| <i>circPTPN13</i> | miR-4778-5p                 | 2 |
| <i>circPTPN13</i> | miR-4779                    | 2 |
| <i>circPTPN13</i> | miR-4786-3p                 | 2 |
| <i>circPTPN13</i> | miR-4786-5p                 | 1 |
| <i>circPTPN13</i> | miR-4789-3p                 | 2 |



|                   |                             |   |
|-------------------|-----------------------------|---|
| <i>circPTPN13</i> | miR-4793-5p                 | 3 |
| <i>circPTPN13</i> | miR-4797-5p                 | 1 |
| <i>circPTPN13</i> | miR-4802-5p                 | 1 |
| <i>circPTPN13</i> | miR-4804-3p                 | 2 |
| <i>circPTPN13</i> | miR-483-3p.2                | 1 |
| <i>circPTPN13</i> | miR-484/3155                | 3 |
| <i>circPTPN13</i> | miR-485-5p                  | 1 |
| <i>circPTPN13</i> | miR-487a-5p/487b-5p         | 2 |
| <i>circPTPN13</i> | miR-488-5p                  | 3 |
| <i>circPTPN13</i> | miR-489-3p                  | 3 |
| <i>circPTPN13</i> | miR-490-3p                  | 2 |
| <i>circPTPN13</i> | miR-490-5p                  | 3 |
| <i>circPTPN13</i> | miR-493-3p                  | 1 |
| <i>circPTPN13</i> | miR-493-5p                  | 1 |
| <i>circPTPN13</i> | miR-496.1                   | 1 |
| <i>circPTPN13</i> | miR-497-3p                  | 1 |
| <i>circPTPN13</i> | miR-4999-3p                 | 1 |
| <i>circPTPN13</i> | miR-4999-5p                 | 1 |
| <i>circPTPN13</i> | miR-499a-3p/499b-3p         | 2 |
| <i>circPTPN13</i> | miR-5000-3p                 | 1 |
| <i>circPTPN13</i> | miR-5004-3p                 | 2 |
| <i>circPTPN13</i> | miR-5006-5p                 | 1 |
| <i>circPTPN13</i> | miR-5007-3p                 | 1 |
| <i>circPTPN13</i> | miR-5007-5p                 | 1 |
| <i>circPTPN13</i> | miR-5008-3p/6737-3p/7157-3p | 2 |
| <i>circPTPN13</i> | miR-500a-5p                 | 1 |
| <i>circPTPN13</i> | miR-501-5p                  | 1 |
| <i>circPTPN13</i> | miR-5011-5p                 | 2 |
| <i>circPTPN13</i> | miR-502-5p                  | 1 |
| <i>circPTPN13</i> | miR-504-3p                  | 2 |
| <i>circPTPN13</i> | miR-505-3p.1                | 1 |
| <i>circPTPN13</i> | miR-505-3p.2                | 2 |
| <i>circPTPN13</i> | miR-505-5p                  | 1 |
| <i>circPTPN13</i> | miR-508-5p                  | 2 |
| <i>circPTPN13</i> | miR-5087                    | 1 |
| <i>circPTPN13</i> | miR-5088-3p                 | 1 |
| <i>circPTPN13</i> | miR-5089-5p                 | 1 |
| <i>circPTPN13</i> | miR-509-3-5p/509-5p/4418    | 1 |

|                   |                                                                  |   |
|-------------------|------------------------------------------------------------------|---|
| <i>circPTPN13</i> | miR-509-3p                                                       | 1 |
| <i>circPTPN13</i> | miR-5093                                                         | 3 |
| <i>circPTPN13</i> | miR-5095/7151-3p                                                 | 1 |
| <i>circPTPN13</i> | miR-5096                                                         | 1 |
| <i>circPTPN13</i> | miR-510-3p                                                       | 1 |
| <i>circPTPN13</i> | miR-5100                                                         | 1 |
| <i>circPTPN13</i> | miR-513a-3p/513c-3p/3606-3p                                      | 1 |
| <i>circPTPN13</i> | miR-513b-3p                                                      | 1 |
| <i>circPTPN13</i> | miR-515-5p/519e-5p                                               | 2 |
| <i>circPTPN13</i> | miR-516a-3p/516b-3p/7162-5p                                      | 1 |
| <i>circPTPN13</i> | miR-516a-5p                                                      | 2 |
| <i>circPTPN13</i> | miR-517-5p                                                       | 1 |
| <i>circPTPN13</i> | miR-5187-5p                                                      | 1 |
| <i>circPTPN13</i> | miR-518c-5p                                                      | 1 |
| <i>circPTPN13</i> | miR-518d-5p/519-5p                                               | 2 |
| <i>circPTPN13</i> | miR-5190                                                         | 1 |
| <i>circPTPN13</i> | miR-5192                                                         | 1 |
| <i>circPTPN13</i> | miR-5193                                                         | 1 |
| <i>circPTPN13</i> | miR-5195-5p                                                      | 1 |
| <i>circPTPN13</i> | miR-5196-3p                                                      | 3 |
| <i>circPTPN13</i> | miR-5197-3p                                                      | 3 |
| <i>circPTPN13</i> | miR-519d-5p                                                      | 2 |
| <i>circPTPN13</i> | miR-522-3p                                                       | 1 |
| <i>circPTPN13</i> | miR-524-5p                                                       | 2 |
| <i>circPTPN13</i> | miR-525-5p                                                       | 2 |
| <i>circPTPN13</i> | miR-526b-5p                                                      | 1 |
| <i>circPTPN13</i> | miR-539-5p                                                       | 2 |
| <i>circPTPN13</i> | miR-541-5p                                                       | 2 |
| <i>circPTPN13</i> | miR-542-3p                                                       | 3 |
| <i>circPTPN13</i> | miR-545-3p                                                       | 2 |
| <i>circPTPN13</i> | miR-548ac/548bb-3p/548d-3p/548h-3p/548z                          |   |
| <i>circPTPN13</i> | miR-548ah-5p/3609                                                | 1 |
| <i>circPTPN13</i> | miR-548ao-5p/548ax                                               | 1 |
| <i>circPTPN13</i> | miR-548aq-3p/548am-3p/548aj-3p/548ah-3p/548ae-3p/548j-3p/548x-3p |   |
| <i>circPTPN13</i> | miR-548au-3p                                                     | 2 |
| <i>circPTPN13</i> | miR-548av-3p                                                     | 2 |
| <i>circPTPN13</i> | miR-548av-5p/548k/8054                                           | 1 |
| <i>circPTPN13</i> | miR-548ay-5p/548au-5p/548as-5p/548ar-5p/548aq-5p/548ap-5p/548am- |   |

|                   |                                               |   |
|-------------------|-----------------------------------------------|---|
| <i>circPTPN13</i> | miR-548az-3p/548ar-3p/548a-3p/548e-3p/548f-3p |   |
| <i>circPTPN13</i> | miR-548b-3p                                   | 3 |
| <i>circPTPN13</i> | miR-548c-3p                                   | 1 |
| <i>circPTPN13</i> | miR-548g-3p                                   | 1 |
| <i>circPTPN13</i> | miR-548l                                      | 1 |
| <i>circPTPN13</i> | miR-548m                                      | 2 |
| <i>circPTPN13</i> | miR-548q                                      | 1 |
| <i>circPTPN13</i> | miR-549a                                      | 1 |
| <i>circPTPN13</i> | miR-551b-5p                                   | 1 |
| <i>circPTPN13</i> | miR-5571-5p                                   | 3 |
| <i>circPTPN13</i> | miR-5572                                      | 1 |
| <i>circPTPN13</i> | miR-5579-3p                                   | 1 |
| <i>circPTPN13</i> | miR-558                                       | 1 |
| <i>circPTPN13</i> | miR-5581-3p                                   | 1 |
| <i>circPTPN13</i> | miR-5582-3p                                   | 3 |
| <i>circPTPN13</i> | miR-5582-5p                                   | 1 |
| <i>circPTPN13</i> | miR-5584-5p                                   | 2 |
| <i>circPTPN13</i> | miR-5585-3p                                   | 1 |
| <i>circPTPN13</i> | miR-5585-5p                                   | 1 |
| <i>circPTPN13</i> | miR-5586-3p                                   | 1 |
| <i>circPTPN13</i> | miR-5586-5p                                   | 2 |
| <i>circPTPN13</i> | miR-5589-3p                                   | 1 |
| <i>circPTPN13</i> | miR-562                                       | 1 |
| <i>circPTPN13</i> | miR-567                                       | 1 |
| <i>circPTPN13</i> | miR-5680                                      | 4 |
| <i>circPTPN13</i> | miR-5681a                                     | 1 |
| <i>circPTPN13</i> | miR-5683                                      | 1 |
| <i>circPTPN13</i> | miR-5687                                      | 1 |
| <i>circPTPN13</i> | miR-5691                                      | 1 |
| <i>circPTPN13</i> | miR-5692a                                     | 3 |
| <i>circPTPN13</i> | miR-5693                                      | 1 |
| <i>circPTPN13</i> | miR-5694                                      | 2 |
| <i>circPTPN13</i> | miR-5695                                      | 2 |
| <i>circPTPN13</i> | miR-5700                                      | 1 |
| <i>circPTPN13</i> | miR-573/3616-5p                               | 2 |
| <i>circPTPN13</i> | miR-574-5p                                    | 1 |
| <i>circPTPN13</i> | miR-577                                       | 2 |
| <i>circPTPN13</i> | miR-578                                       | 2 |

|                   |                                      |   |
|-------------------|--------------------------------------|---|
| <i>circPTPN13</i> | miR-580-5p                           | 1 |
| <i>circPTPN13</i> | miR-581                              | 1 |
| <i>circPTPN13</i> | miR-582-3p                           | 2 |
| <i>circPTPN13</i> | miR-582-5p                           | 1 |
| <i>circPTPN13</i> | miR-583                              | 1 |
| <i>circPTPN13</i> | miR-587                              | 1 |
| <i>circPTPN13</i> | miR-589-3p                           | 3 |
| <i>circPTPN13</i> | miR-591                              | 1 |
| <i>circPTPN13</i> | miR-592                              | 1 |
| <i>circPTPN13</i> | miR-593-3p                           | 3 |
| <i>circPTPN13</i> | miR-595                              | 1 |
| <i>circPTPN13</i> | miR-596                              | 1 |
| <i>circPTPN13</i> | miR-597-5p                           | 1 |
| <i>circPTPN13</i> | miR-599                              | 1 |
| <i>circPTPN13</i> | miR-600                              | 1 |
| <i>circPTPN13</i> | miR-603                              | 1 |
| <i>circPTPN13</i> | miR-605-5p                           | 1 |
| <i>circPTPN13</i> | miR-607                              | 2 |
| <i>circPTPN13</i> | miR-6077                             | 1 |
| <i>circPTPN13</i> | miR-612/1285-3p/3187-5p/5189-5p/6860 | 1 |
| <i>circPTPN13</i> | miR-6124                             | 2 |
| <i>circPTPN13</i> | miR-6132/6836-5p                     | 1 |
| <i>circPTPN13</i> | miR-6134                             | 2 |
| <i>circPTPN13</i> | miR-616-3p                           | 2 |
| <i>circPTPN13</i> | miR-622                              | 1 |
| <i>circPTPN13</i> | miR-623                              | 1 |
| <i>circPTPN13</i> | miR-625-3p                           | 1 |
| <i>circPTPN13</i> | miR-627-3p                           | 2 |
| <i>circPTPN13</i> | miR-628-3p                           | 1 |
| <i>circPTPN13</i> | miR-628-5p                           | 1 |
| <i>circPTPN13</i> | miR-629-5p                           | 1 |
| <i>circPTPN13</i> | miR-633                              | 3 |
| <i>circPTPN13</i> | miR-635/6774-5p                      | 2 |
| <i>circPTPN13</i> | miR-642-3p                           | 1 |
| <i>circPTPN13</i> | miR-642a-5p                          | 1 |
| <i>circPTPN13</i> | miR-644a                             | 1 |
| <i>circPTPN13</i> | miR-648                              | 1 |
| <i>circPTPN13</i> | miR-649                              | 2 |

|                   |                     |   |
|-------------------|---------------------|---|
| <i>circPTPN13</i> | miR-6499-3p         | 3 |
| <i>circPTPN13</i> | miR-6500-3p         | 1 |
| <i>circPTPN13</i> | miR-6502-3p         | 1 |
| <i>circPTPN13</i> | miR-6503-3p         | 1 |
| <i>circPTPN13</i> | miR-6508-3p         | 2 |
| <i>circPTPN13</i> | miR-6508-5p/8067    | 2 |
| <i>circPTPN13</i> | miR-651-3p          | 2 |
| <i>circPTPN13</i> | miR-6512-5p         | 1 |
| <i>circPTPN13</i> | miR-6513-3p         | 1 |
| <i>circPTPN13</i> | miR-6513-5p         | 2 |
| <i>circPTPN13</i> | miR-6514-5p         | 1 |
| <i>circPTPN13</i> | miR-6515-5p         | 1 |
| <i>circPTPN13</i> | miR-652-5p          | 1 |
| <i>circPTPN13</i> | miR-653-3p          | 1 |
| <i>circPTPN13</i> | miR-654-3p          | 1 |
| <i>circPTPN13</i> | miR-654-5p          | 2 |
| <i>circPTPN13</i> | miR-659-3p          | 2 |
| <i>circPTPN13</i> | miR-660-3p          | 1 |
| <i>circPTPN13</i> | miR-661             | 1 |
| <i>circPTPN13</i> | miR-664a-3p         | 2 |
| <i>circPTPN13</i> | miR-664a-5p/4794    | 1 |
| <i>circPTPN13</i> | miR-670-3p          | 1 |
| <i>circPTPN13</i> | miR-670-5p          | 1 |
| <i>circPTPN13</i> | miR-6715a-3p        | 1 |
| <i>circPTPN13</i> | miR-6716-3p         | 1 |
| <i>circPTPN13</i> | miR-6719-3p         | 2 |
| <i>circPTPN13</i> | miR-6720-5p         | 1 |
| <i>circPTPN13</i> | miR-6721-5p         | 1 |
| <i>circPTPN13</i> | miR-6724-5p/6773-5p | 2 |
| <i>circPTPN13</i> | miR-6728-5p         | 1 |
| <i>circPTPN13</i> | miR-6730-3p         | 2 |
| <i>circPTPN13</i> | miR-6730-5p         | 1 |
| <i>circPTPN13</i> | miR-6731-3p         | 1 |
| <i>circPTPN13</i> | miR-6731-5p/8085    | 2 |
| <i>circPTPN13</i> | miR-6732-3p         | 1 |
| <i>circPTPN13</i> | miR-6733-3p         | 2 |
| <i>circPTPN13</i> | miR-6734-5p         | 3 |
| <i>circPTPN13</i> | miR-6735-3p         | 1 |

|                   |                       |   |
|-------------------|-----------------------|---|
| <i>circPTPN13</i> | miR-6739-3p           | 2 |
| <i>circPTPN13</i> | miR-6740-5p           | 1 |
| <i>circPTPN13</i> | miR-6744-5p           | 1 |
| <i>circPTPN13</i> | miR-675-3p            | 2 |
| <i>circPTPN13</i> | miR-6750-5p/6822-5p   | 2 |
| <i>circPTPN13</i> | miR-6753-3p/7107-3p   | 1 |
| <i>circPTPN13</i> | miR-6757-3p           | 1 |
| <i>circPTPN13</i> | miR-6757-5p           | 2 |
| <i>circPTPN13</i> | miR-6758-5p/6856-5p   | 2 |
| <i>circPTPN13</i> | miR-6759-5p           | 2 |
| <i>circPTPN13</i> | miR-676-3p            | 2 |
| <i>circPTPN13</i> | miR-676-5p            | 2 |
| <i>circPTPN13</i> | miR-6760-3p           | 3 |
| <i>circPTPN13</i> | miR-6760-5p           | 1 |
| <i>circPTPN13</i> | miR-6761-5p           | 1 |
| <i>circPTPN13</i> | miR-6764-3p/6824-3p   | 1 |
| <i>circPTPN13</i> | miR-6765-5p           | 1 |
| <i>circPTPN13</i> | miR-6767-5p           | 1 |
| <i>circPTPN13</i> | miR-6769a-3p          | 1 |
| <i>circPTPN13</i> | miR-6769a-5p/6769b-5p | 2 |
| <i>circPTPN13</i> | miR-6770-5p           | 4 |
| <i>circPTPN13</i> | miR-6771-3p           | 2 |
| <i>circPTPN13</i> | miR-6773-3p           | 1 |
| <i>circPTPN13</i> | miR-6778-3p           | 1 |
| <i>circPTPN13</i> | miR-6779-3p           | 1 |
| <i>circPTPN13</i> | miR-6782-3p           | 1 |
| <i>circPTPN13</i> | miR-6783-5p           | 1 |
| <i>circPTPN13</i> | miR-6791-3p/6829-3p   | 1 |
| <i>circPTPN13</i> | miR-6793-3p           | 2 |
| <i>circPTPN13</i> | miR-6796-5p           | 2 |
| <i>circPTPN13</i> | miR-6800-3p           | 1 |
| <i>circPTPN13</i> | miR-6800-5p           | 1 |
| <i>circPTPN13</i> | miR-6802-5p           | 1 |
| <i>circPTPN13</i> | miR-6804-5p           | 1 |
| <i>circPTPN13</i> | miR-6810-5p           | 1 |
| <i>circPTPN13</i> | miR-6811-3p           | 1 |
| <i>circPTPN13</i> | miR-6814-3p/6872-5p   | 1 |
| <i>circPTPN13</i> | miR-6815-3p           | 2 |

|                   |                     |   |
|-------------------|---------------------|---|
| <i>circPTPN13</i> | miR-6815-5p/6865-5p | 3 |
| <i>circPTPN13</i> | miR-6817-3p         | 1 |
| <i>circPTPN13</i> | miR-6818-3p         | 1 |
| <i>circPTPN13</i> | miR-6818-5p         | 1 |
| <i>circPTPN13</i> | miR-6822-3p         | 1 |
| <i>circPTPN13</i> | miR-6823-5p         | 1 |
| <i>circPTPN13</i> | miR-6825-5p         | 1 |
| <i>circPTPN13</i> | miR-6827-5p         | 2 |
| <i>circPTPN13</i> | miR-6830-5p         | 1 |
| <i>circPTPN13</i> | miR-6832-3p         | 1 |
| <i>circPTPN13</i> | miR-6832-5p         | 1 |
| <i>circPTPN13</i> | miR-6833-5p         | 1 |
| <i>circPTPN13</i> | miR-6834-3p         | 1 |
| <i>circPTPN13</i> | miR-6834-5p         | 3 |
| <i>circPTPN13</i> | miR-6836-3p         | 2 |
| <i>circPTPN13</i> | miR-6837-3p         | 2 |
| <i>circPTPN13</i> | miR-6839-3p         | 1 |
| <i>circPTPN13</i> | miR-6844            | 1 |
| <i>circPTPN13</i> | miR-6845-3p         | 1 |
| <i>circPTPN13</i> | miR-6847-5p         | 1 |
| <i>circPTPN13</i> | miR-6856-3p         | 1 |
| <i>circPTPN13</i> | miR-6857-3p         | 1 |
| <i>circPTPN13</i> | miR-6857-5p         | 1 |
| <i>circPTPN13</i> | miR-6868-5p         | 2 |
| <i>circPTPN13</i> | miR-6869-5p         | 1 |
| <i>circPTPN13</i> | miR-6870-3p         | 1 |
| <i>circPTPN13</i> | miR-6871-5p         | 1 |
| <i>circPTPN13</i> | miR-6873-3p         | 3 |
| <i>circPTPN13</i> | miR-6873-5p         | 2 |
| <i>circPTPN13</i> | miR-6874-5p         | 1 |
| <i>circPTPN13</i> | miR-6875-3p         | 3 |
| <i>circPTPN13</i> | miR-6878-5p         | 2 |
| <i>circPTPN13</i> | miR-6886-3p         | 1 |
| <i>circPTPN13</i> | miR-6888-3p         | 2 |
| <i>circPTPN13</i> | miR-6889-3p         | 2 |
| <i>circPTPN13</i> | miR-6890-3p         | 1 |
| <i>circPTPN13</i> | miR-6892-5p         | 1 |
| <i>circPTPN13</i> | miR-6895-3p         | 3 |

|                   |             |   |
|-------------------|-------------|---|
| <i>circPTPN13</i> | miR-6895-5p | 1 |
| <i>circPTPN13</i> | miR-7-3p    | 3 |
| <i>circPTPN13</i> | miR-7-5p    | 1 |
| <i>circPTPN13</i> | miR-708-3p  | 1 |
| <i>circPTPN13</i> | miR-7108-5p | 2 |
| <i>circPTPN13</i> | miR-7110-3p | 1 |
| <i>circPTPN13</i> | miR-7113-5p | 1 |
| <i>circPTPN13</i> | miR-7114-5p | 1 |
| <i>circPTPN13</i> | miR-7150    | 5 |
| <i>circPTPN13</i> | miR-7151-5p | 1 |
| <i>circPTPN13</i> | miR-7152-5p | 2 |
| <i>circPTPN13</i> | miR-7153-3p | 1 |
| <i>circPTPN13</i> | miR-7158-3p | 1 |
| <i>circPTPN13</i> | miR-7159-5p | 2 |
| <i>circPTPN13</i> | miR-7160-3p | 1 |
| <i>circPTPN13</i> | miR-7160-5p | 1 |
| <i>circPTPN13</i> | miR-7161-3p | 2 |
| <i>circPTPN13</i> | miR-7162-3p | 4 |
| <i>circPTPN13</i> | miR-7515    | 1 |
| <i>circPTPN13</i> | miR-760     | 1 |
| <i>circPTPN13</i> | miR-7641    | 3 |
| <i>circPTPN13</i> | miR-766-3p  | 2 |
| <i>circPTPN13</i> | miR-767-3p  | 1 |
| <i>circPTPN13</i> | miR-769-5p  | 1 |
| <i>circPTPN13</i> | miR-7705    | 1 |
| <i>circPTPN13</i> | miR-7843-3p | 2 |
| <i>circPTPN13</i> | miR-7844-5p | 1 |
| <i>circPTPN13</i> | miR-7845-5p | 1 |
| <i>circPTPN13</i> | miR-7847-3p | 2 |
| <i>circPTPN13</i> | miR-7849-3p | 1 |
| <i>circPTPN13</i> | miR-7854-3p | 2 |
| <i>circPTPN13</i> | miR-7977    | 2 |
| <i>circPTPN13</i> | miR-7978    | 1 |
| <i>circPTPN13</i> | miR-8056    | 1 |
| <i>circPTPN13</i> | miR-8057    | 2 |
| <i>circPTPN13</i> | miR-8065    | 1 |
| <i>circPTPN13</i> | miR-8066    | 2 |
| <i>circPTPN13</i> | miR-8068    | 1 |



|                   |                          |   |
|-------------------|--------------------------|---|
| <i>circPTPN13</i> | miR-8070                 | 1 |
| <i>circPTPN13</i> | miR-8075                 | 1 |
| <i>circPTPN13</i> | miR-8077                 | 1 |
| <i>circPTPN13</i> | miR-8078                 | 2 |
| <i>circPTPN13</i> | miR-8083                 | 1 |
| <i>circPTPN13</i> | miR-8485                 | 1 |
| <i>circPTPN13</i> | miR-873-5p.1             | 1 |
| <i>circPTPN13</i> | miR-875-3p               | 3 |
| <i>circPTPN13</i> | miR-876-3p               | 1 |
| <i>circPTPN13</i> | miR-885-3p               | 3 |
| <i>circPTPN13</i> | miR-887-5p               | 2 |
| <i>circPTPN13</i> | miR-889-3p               | 2 |
| <i>circPTPN13</i> | miR-889-5p               | 1 |
| <i>circPTPN13</i> | miR-891a-3p              | 2 |
| <i>circPTPN13</i> | miR-892a                 | 2 |
| <i>circPTPN13</i> | miR-921                  | 1 |
| <i>circPTPN13</i> | miR-922                  | 2 |
| <i>circPTPN13</i> | miR-92a-1-5p             | 1 |
| <i>circPTPN13</i> | miR-92a-2-5p             | 2 |
| <i>circPTPN13</i> | miR-935                  | 2 |
| <i>circPTPN13</i> | miR-938                  | 1 |
| <i>circPTPN13</i> | miR-939-5p/1343-5p       | 1 |
| <i>circPTPN13</i> | miR-943                  | 1 |
| <i>circPTPN13</i> | miR-944                  | 1 |
| <i>circPTPN13</i> | miR-9500                 | 2 |
| <i>circPTPN13</i> | miR-101-3p.1             | 1 |
| <i>circPTPN13</i> | miR-1183                 | 1 |
| <i>circPTPN13</i> | miR-1228-3p              | 1 |
| <i>circPTPN13</i> | miR-1231                 | 1 |
| <i>circPTPN13</i> | miR-1236-3p              | 1 |
| <i>circPTPN13</i> | miR-124-5p               | 3 |
| <i>circPTPN13</i> | miR-1256                 | 1 |
| <i>circPTPN13</i> | miR-126-3p.2             | 1 |
| <i>circPTPN13</i> | miR-1262/4701-3p/6736-5p | 2 |
| <i>circPTPN13</i> | miR-1285-5p              | 1 |
| <i>circPTPN13</i> | miR-1293/4483            | 2 |
| <i>circPTPN13</i> | miR-1303                 | 1 |
| <i>circPTPN13</i> | miR-1306-5p              | 1 |

|                   |                       |   |
|-------------------|-----------------------|---|
| <i>circPTPN13</i> | miR-132-3p/212-3p     | 1 |
| <i>circPTPN13</i> | miR-139-3p            | 1 |
| <i>circPTPN13</i> | miR-140-3p.1          | 2 |
| <i>circPTPN13</i> | miR-144-3p            | 1 |
| <i>circPTPN13</i> | miR-146-5p            | 1 |
| <i>circPTPN13</i> | miR-151-3p            | 2 |
| <i>circPTPN13</i> | miR-153-5p            | 2 |
| <i>circPTPN13</i> | miR-183-3p            | 1 |
| <i>circPTPN13</i> | miR-1911-3p           | 2 |
| <i>circPTPN13</i> | miR-192-5p/215-5p     | 2 |
| <i>circPTPN13</i> | miR-196b-3p           | 2 |
| <i>circPTPN13</i> | miR-20b-3p            | 1 |
| <i>circPTPN13</i> | miR-2113              | 1 |
| <i>circPTPN13</i> | miR-2116-5p           | 1 |
| <i>circPTPN13</i> | miR-212-5p            | 1 |
| <i>circPTPN13</i> | miR-216b-3p           | 2 |
| <i>circPTPN13</i> | miR-219-5p            | 1 |
| <i>circPTPN13</i> | miR-219a-1-3p         | 1 |
| <i>circPTPN13</i> | miR-22-5p             | 1 |
| <i>circPTPN13</i> | miR-2277-3p           | 2 |
| <i>circPTPN13</i> | miR-23-3p             | 1 |
| <i>circPTPN13</i> | miR-2355-3p           | 1 |
| <i>circPTPN13</i> | miR-2355-5p           | 2 |
| <i>circPTPN13</i> | miR-3074-3p           | 1 |
| <i>circPTPN13</i> | miR-3115              | 2 |
| <i>circPTPN13</i> | miR-3117-3p           | 2 |
| <i>circPTPN13</i> | miR-3117-5p           | 3 |
| <i>circPTPN13</i> | miR-3125/3916/6859-5p | 1 |
| <i>circPTPN13</i> | miR-3137              | 1 |
| <i>circPTPN13</i> | miR-3151-5p           | 1 |
| <i>circPTPN13</i> | miR-3160-5p           | 1 |
| <i>circPTPN13</i> | miR-3170/6855-5p      | 1 |
| <i>circPTPN13</i> | miR-3171              | 2 |
| <i>circPTPN13</i> | miR-3189-3p           | 1 |
| <i>circPTPN13</i> | miR-3200-3p           | 2 |
| <i>circPTPN13</i> | miR-345-5p            | 1 |
| <i>circPTPN13</i> | miR-361-5p            | 1 |
| <i>circPTPN13</i> | miR-3611              | 1 |

|                   |                           |   |
|-------------------|---------------------------|---|
| <i>circPTPN13</i> | miR-3622a-3p/3622b-3p     | 1 |
| <i>circPTPN13</i> | miR-363-5p/6745           | 2 |
| <i>circPTPN13</i> | miR-3655                  | 1 |
| <i>circPTPN13</i> | miR-3664-5p               | 1 |
| <i>circPTPN13</i> | miR-3692-3p               | 2 |
| <i>circPTPN13</i> | miR-3692-5p               | 1 |
| <i>circPTPN13</i> | miR-371-5p                | 2 |
| <i>circPTPN13</i> | miR-371b-5p/373-5p/616-5p | 2 |
| <i>circPTPN13</i> | miR-372-5p                | 2 |
| <i>circPTPN13</i> | miR-374-5p                | 1 |
| <i>circPTPN13</i> | miR-382-3p                | 2 |
| <i>circPTPN13</i> | miR-3945                  | 1 |
| <i>circPTPN13</i> | miR-409-3p                | 1 |
| <i>circPTPN13</i> | miR-409-5p                | 1 |
| <i>circPTPN13</i> | miR-4253/6862-5p          | 1 |
| <i>circPTPN13</i> | miR-4263                  | 2 |
| <i>circPTPN13</i> | miR-4264                  | 2 |
| <i>circPTPN13</i> | miR-4268                  | 2 |
| <i>circPTPN13</i> | miR-4273/7156-5p          | 1 |
| <i>circPTPN13</i> | miR-4276                  | 3 |
| <i>circPTPN13</i> | miR-4277                  | 2 |
| <i>circPTPN13</i> | miR-4282                  | 2 |
| <i>circPTPN13</i> | miR-4287/4685-3p          | 1 |
| <i>circPTPN13</i> | miR-4289                  | 1 |
| <i>circPTPN13</i> | miR-4305                  | 2 |
| <i>circPTPN13</i> | miR-4312                  | 1 |
| <i>circPTPN13</i> | miR-4324                  | 1 |
| <i>circPTPN13</i> | miR-4327                  | 2 |
| <i>circPTPN13</i> | miR-4421/5699-3p          | 2 |
| <i>circPTPN13</i> | miR-4445-5p               | 1 |
| <i>circPTPN13</i> | miR-4447/4472             | 1 |
| <i>circPTPN13</i> | miR-4448                  | 2 |
| <i>circPTPN13</i> | miR-4452                  | 1 |
| <i>circPTPN13</i> | miR-4453/4538             | 2 |
| <i>circPTPN13</i> | miR-4469                  | 1 |
| <i>circPTPN13</i> | miR-4474-5p               | 1 |
| <i>circPTPN13</i> | miR-4494                  | 1 |
| <i>circPTPN13</i> | miR-4522                  | 1 |

|                   |                              |   |
|-------------------|------------------------------|---|
| <i>circPTPN13</i> | miR-4636                     | 1 |
| <i>circPTPN13</i> | miR-4637                     | 2 |
| <i>circPTPN13</i> | miR-4645-5p/4673             | 2 |
| <i>circPTPN13</i> | miR-4646-3p                  | 1 |
| <i>circPTPN13</i> | miR-4655-5p                  | 1 |
| <i>circPTPN13</i> | miR-4662-5p                  | 2 |
| <i>circPTPN13</i> | miR-4667-5p/4700-5p/8089     | 1 |
| <i>circPTPN13</i> | miR-4677-5p                  | 1 |
| <i>circPTPN13</i> | miR-4683                     | 1 |
| <i>circPTPN13</i> | miR-4693-5p                  | 1 |
| <i>circPTPN13</i> | miR-4714-3p                  | 2 |
| <i>circPTPN13</i> | miR-4714-5p                  | 1 |
| <i>circPTPN13</i> | miR-4715-3p                  | 1 |
| <i>circPTPN13</i> | miR-4716-5p                  | 1 |
| <i>circPTPN13</i> | miR-4742-3p                  | 3 |
| <i>circPTPN13</i> | miR-4760-3p                  | 2 |
| <i>circPTPN13</i> | miR-4760-5p/8061             | 1 |
| <i>circPTPN13</i> | miR-4764-3p                  | 2 |
| <i>circPTPN13</i> | miR-4764-5p                  | 2 |
| <i>circPTPN13</i> | miR-4781-3p                  | 1 |
| <i>circPTPN13</i> | miR-4797-3p                  | 2 |
| <i>circPTPN13</i> | miR-486-5p                   | 2 |
| <i>circPTPN13</i> | miR-488-3p                   | 1 |
| <i>circPTPN13</i> | miR-491-5p                   | 1 |
| <i>circPTPN13</i> | miR-499b-5p                  | 1 |
| <i>circPTPN13</i> | miR-5000-5p                  | 2 |
| <i>circPTPN13</i> | miR-5003-3p                  | 1 |
| <i>circPTPN13</i> | miR-5010-3p                  | 1 |
| <i>circPTPN13</i> | miR-508-3p                   | 1 |
| <i>circPTPN13</i> | miR-513c-5p/514b-5p          | 1 |
| <i>circPTPN13</i> | miR-514a-3p                  | 2 |
| <i>circPTPN13</i> | miR-514a-5p                  | 1 |
| <i>circPTPN13</i> | miR-5186                     | 1 |
| <i>circPTPN13</i> | miR-544b                     | 1 |
| <i>circPTPN13</i> | miR-548ai/548ag/548ba/570-5p | 1 |
| <i>circPTPN13</i> | miR-548at-5p                 | 2 |
| <i>circPTPN13</i> | miR-548az-5p/548t-5p         | 2 |
| <i>circPTPN13</i> | miR-548n                     | 2 |

|                   |                             |   |
|-------------------|-----------------------------|---|
| <i>circPTPN13</i> | miR-561-3p                  | 2 |
| <i>circPTPN13</i> | miR-5690                    | 2 |
| <i>circPTPN13</i> | miR-5696                    | 2 |
| <i>circPTPN13</i> | miR-571                     | 1 |
| <i>circPTPN13</i> | miR-575/4676-5p             | 2 |
| <i>circPTPN13</i> | miR-576-3p                  | 1 |
| <i>circPTPN13</i> | miR-576-5p                  | 2 |
| <i>circPTPN13</i> | miR-579-3p                  | 2 |
| <i>circPTPN13</i> | miR-580-3p                  | 1 |
| <i>circPTPN13</i> | miR-589-5p                  | 1 |
| <i>circPTPN13</i> | miR-6071                    | 1 |
| <i>circPTPN13</i> | miR-6083                    | 1 |
| <i>circPTPN13</i> | miR-624-5p                  | 1 |
| <i>circPTPN13</i> | miR-630                     | 3 |
| <i>circPTPN13</i> | miR-631/3661                | 1 |
| <i>circPTPN13</i> | miR-632/4288                | 1 |
| <i>circPTPN13</i> | miR-637                     | 1 |
| <i>circPTPN13</i> | miR-651-5p                  | 2 |
| <i>circPTPN13</i> | miR-6515-3p                 | 1 |
| <i>circPTPN13</i> | miR-6715b-3p                | 1 |
| <i>circPTPN13</i> | miR-6716-5p                 | 1 |
| <i>circPTPN13</i> | miR-6728-3p                 | 1 |
| <i>circPTPN13</i> | miR-6737-5p/6812-5p/6819-5p | 1 |
| <i>circPTPN13</i> | miR-6741-5p                 | 2 |
| <i>circPTPN13</i> | miR-6742-3p                 | 1 |
| <i>circPTPN13</i> | miR-6742-5p                 | 1 |
| <i>circPTPN13</i> | miR-6748-3p                 | 2 |
| <i>circPTPN13</i> | miR-6755-5p                 | 1 |
| <i>circPTPN13</i> | miR-6756-5p/6766-5p         | 2 |
| <i>circPTPN13</i> | miR-6759-3p                 | 1 |
| <i>circPTPN13</i> | miR-6765-3p                 | 1 |
| <i>circPTPN13</i> | miR-6772-3p                 | 1 |
| <i>circPTPN13</i> | miR-6776-3p                 | 1 |
| <i>circPTPN13</i> | miR-6813-3p                 | 2 |
| <i>circPTPN13</i> | miR-6814-5p                 | 2 |
| <i>circPTPN13</i> | miR-6828-3p                 | 1 |
| <i>circPTPN13</i> | miR-6830-3p                 | 1 |
| <i>circPTPN13</i> | miR-6831-3p                 | 2 |

|                   |                     |   |
|-------------------|---------------------|---|
| <i>circPTPN13</i> | miR-6841-5p         | 1 |
| <i>circPTPN13</i> | miR-6852-5p         | 1 |
| <i>circPTPN13</i> | miR-6858-3p         | 2 |
| <i>circPTPN13</i> | miR-6868-3p         | 2 |
| <i>circPTPN13</i> | miR-6884-3p         | 1 |
| <i>circPTPN13</i> | miR-6885-3p         | 1 |
| <i>circPTPN13</i> | miR-7106-3p         | 1 |
| <i>circPTPN13</i> | miR-7113-3p         | 1 |
| <i>circPTPN13</i> | miR-7155-5p         | 1 |
| <i>circPTPN13</i> | miR-758-3p          | 1 |
| <i>circPTPN13</i> | miR-8069            | 1 |
| <i>circPTPN13</i> | miR-93-3p           | 1 |
| <i>circPTPN13</i> | miR-939-3p          | 1 |
| <i>circPTPN13</i> | miR-105-5p          | 1 |
| <i>circPTPN13</i> | miR-1193            | 1 |
| <i>circPTPN13</i> | miR-1203            | 1 |
| <i>circPTPN13</i> | miR-1225-3p         | 1 |
| <i>circPTPN13</i> | miR-1225-5p         | 1 |
| <i>circPTPN13</i> | miR-1229-5p         | 1 |
| <i>circPTPN13</i> | miR-1252-5p         | 1 |
| <i>circPTPN13</i> | miR-1255b-2-3p      | 1 |
| <i>circPTPN13</i> | miR-1273d           | 2 |
| <i>circPTPN13</i> | miR-1279            | 1 |
| <i>circPTPN13</i> | miR-1287-5p         | 2 |
| <i>circPTPN13</i> | miR-1295b-5p/1912   | 1 |
| <i>circPTPN13</i> | miR-1301-3p         | 1 |
| <i>circPTPN13</i> | miR-130b-5p         | 1 |
| <i>circPTPN13</i> | miR-142-3p.2        | 1 |
| <i>circPTPN13</i> | miR-145-5p          | 2 |
| <i>circPTPN13</i> | miR-1468-5p         | 1 |
| <i>circPTPN13</i> | miR-148b-5p/6874-3p | 1 |
| <i>circPTPN13</i> | miR-155-5p          | 1 |
| <i>circPTPN13</i> | miR-18-5p           | 2 |
| <i>circPTPN13</i> | miR-181a-3p         | 1 |
| <i>circPTPN13</i> | miR-181c-3p         | 1 |
| <i>circPTPN13</i> | miR-182-3p          | 1 |
| <i>circPTPN13</i> | miR-18a-3p          | 1 |
| <i>circPTPN13</i> | miR-1915-3p/6764-5p | 3 |

|                   |                     |   |
|-------------------|---------------------|---|
| <i>circPTPN13</i> | miR-194-5p          | 1 |
| <i>circPTPN13</i> | miR-20a-3p          | 1 |
| <i>circPTPN13</i> | miR-218-1-3p        | 1 |
| <i>circPTPN13</i> | miR-218-2-3p        | 1 |
| <i>circPTPN13</i> | miR-218-5p          | 1 |
| <i>circPTPN13</i> | miR-2681-3p         | 1 |
| <i>circPTPN13</i> | miR-28-5p/708-5p    | 1 |
| <i>circPTPN13</i> | miR-2909            | 1 |
| <i>circPTPN13</i> | miR-3064-5p         | 1 |
| <i>circPTPN13</i> | miR-3130-5p/4482-5p | 1 |
| <i>circPTPN13</i> | miR-3135b           | 2 |
| <i>circPTPN13</i> | miR-3144-3p         | 1 |
| <i>circPTPN13</i> | miR-3152-3p         | 1 |
| <i>circPTPN13</i> | miR-3168            | 1 |
| <i>circPTPN13</i> | miR-3180-5p         | 1 |
| <i>circPTPN13</i> | miR-324-3p/1913     | 1 |
| <i>circPTPN13</i> | miR-34b-3p          | 2 |
| <i>circPTPN13</i> | miR-34c-3p          | 2 |
| <i>circPTPN13</i> | miR-3605-3p         | 1 |
| <i>circPTPN13</i> | miR-3652/4430       | 1 |
| <i>circPTPN13</i> | miR-3657            | 1 |
| <i>circPTPN13</i> | miR-3667-3p         | 1 |
| <i>circPTPN13</i> | miR-380-5p/563      | 1 |
| <i>circPTPN13</i> | miR-3912-5p         | 1 |
| <i>circPTPN13</i> | miR-3929/4419b/4478 | 1 |
| <i>circPTPN13</i> | miR-3940-3p         | 1 |
| <i>circPTPN13</i> | miR-3973            | 1 |
| <i>circPTPN13</i> | miR-4259            | 1 |
| <i>circPTPN13</i> | miR-4281            | 1 |
| <i>circPTPN13</i> | miR-4297/5581-5p    | 1 |
| <i>circPTPN13</i> | miR-432-5p          | 1 |
| <i>circPTPN13</i> | miR-433-3p          | 2 |
| <i>circPTPN13</i> | miR-4433a-3p        | 1 |
| <i>circPTPN13</i> | miR-4459            | 1 |
| <i>circPTPN13</i> | miR-4484            | 1 |
| <i>circPTPN13</i> | miR-4501            | 1 |
| <i>circPTPN13</i> | miR-4505/5787       | 1 |
| <i>circPTPN13</i> | miR-4537            | 1 |

|                   |                            |   |
|-------------------|----------------------------|---|
| <i>circPTPN13</i> | miR-4653-3p                | 1 |
| <i>circPTPN13</i> | miR-4669                   | 1 |
| <i>circPTPN13</i> | miR-4684-3p                | 1 |
| <i>circPTPN13</i> | miR-4687-3p                | 1 |
| <i>circPTPN13</i> | miR-4691-5p/6792-3p        | 1 |
| <i>circPTPN13</i> | miR-4715-5p                | 1 |
| <i>circPTPN13</i> | miR-4726-3p                | 3 |
| <i>circPTPN13</i> | miR-4727-5p                | 1 |
| <i>circPTPN13</i> | miR-4761-5p                | 2 |
| <i>circPTPN13</i> | miR-4766-3p                | 1 |
| <i>circPTPN13</i> | miR-4768-3p                | 1 |
| <i>circPTPN13</i> | miR-4768-5p/6833-3p        | 1 |
| <i>circPTPN13</i> | miR-4795-5p                | 1 |
| <i>circPTPN13</i> | miR-4803                   | 1 |
| <i>circPTPN13</i> | miR-483-3p.1               | 1 |
| <i>circPTPN13</i> | miR-492                    | 1 |
| <i>circPTPN13</i> | miR-498                    | 1 |
| <i>circPTPN13</i> | miR-5001-3p                | 1 |
| <i>circPTPN13</i> | miR-510-5p                 | 1 |
| <i>circPTPN13</i> | miR-5197-5p                | 1 |
| <i>circPTPN13</i> | miR-520g-3p                | 1 |
| <i>circPTPN13</i> | miR-520g-5p                | 1 |
| <i>circPTPN13</i> | miR-543                    | 1 |
| <i>circPTPN13</i> | miR-548an                  | 1 |
| <i>circPTPN13</i> | miR-548ap-3p/548aa/548t-3p | 2 |
| <i>circPTPN13</i> | miR-548as-3p               | 2 |
| <i>circPTPN13</i> | miR-548ay-3p/548at-3p      | 2 |
| <i>circPTPN13</i> | miR-548p                   | 1 |
| <i>circPTPN13</i> | miR-555                    | 2 |
| <i>circPTPN13</i> | miR-556-5p                 | 1 |
| <i>circPTPN13</i> | miR-5584-3p                | 1 |
| <i>circPTPN13</i> | miR-561-5p                 | 1 |
| <i>circPTPN13</i> | miR-568                    | 1 |
| <i>circPTPN13</i> | miR-5681b                  | 1 |
| <i>circPTPN13</i> | miR-5702                   | 1 |
| <i>circPTPN13</i> | miR-604                    | 1 |
| <i>circPTPN13</i> | miR-6068                   | 1 |
| <i>circPTPN13</i> | miR-6081                   | 1 |



|                   |                 |   |
|-------------------|-----------------|---|
| <i>circPTPN13</i> | miR-6126        | 1 |
| <i>circPTPN13</i> | miR-618         | 1 |
| <i>circPTPN13</i> | miR-626/6876-3p | 1 |
| <i>circPTPN13</i> | miR-627-5p      | 1 |
| <i>circPTPN13</i> | miR-647         | 2 |
| <i>circPTPN13</i> | miR-6507-3p     | 1 |
| <i>circPTPN13</i> | miR-656-3p      | 1 |
| <i>circPTPN13</i> | miR-659-5p      | 1 |
| <i>circPTPN13</i> | miR-671-5p      | 1 |
| <i>circPTPN13</i> | miR-6734-3p     | 1 |
| <i>circPTPN13</i> | miR-6740-3p     | 1 |
| <i>circPTPN13</i> | miR-6749-3p     | 1 |
| <i>circPTPN13</i> | miR-6762-3p     | 1 |
| <i>circPTPN13</i> | miR-6768-3p     | 1 |
| <i>circPTPN13</i> | miR-6776-5p     | 1 |
| <i>circPTPN13</i> | miR-6780a-3p    | 1 |
| <i>circPTPN13</i> | miR-6786-5p     | 1 |
| <i>circPTPN13</i> | miR-6790-3p     | 1 |
| <i>circPTPN13</i> | miR-6807-5p     | 1 |
| <i>circPTPN13</i> | miR-6809-3p     | 1 |
| <i>circPTPN13</i> | miR-6821-3p     | 1 |
| <i>circPTPN13</i> | miR-6828-5p     | 1 |
| <i>circPTPN13</i> | miR-6840-3p     | 3 |
| <i>circPTPN13</i> | miR-6842-3p     | 2 |
| <i>circPTPN13</i> | miR-6861-3p     | 1 |
| <i>circPTPN13</i> | miR-6861-5p     | 1 |
| <i>circPTPN13</i> | miR-6864-5p     | 1 |
| <i>circPTPN13</i> | miR-6866-5p     | 1 |
| <i>circPTPN13</i> | miR-6881-3p     | 1 |
| <i>circPTPN13</i> | miR-7111-3p     | 1 |
| <i>circPTPN13</i> | miR-7154-5p     | 2 |
| <i>circPTPN13</i> | miR-7156-3p     | 1 |
| <i>circPTPN13</i> | miR-744-3p      | 2 |
| <i>circPTPN13</i> | miR-758-5p      | 1 |
| <i>circPTPN13</i> | miR-7848-3p     | 1 |
| <i>circPTPN13</i> | miR-7850-5p     | 1 |
| <i>circPTPN13</i> | miR-7974        | 1 |
| <i>circPTPN13</i> | miR-8060        | 1 |

|                    |                          |   |
|--------------------|--------------------------|---|
| <i>circPTPN13</i>  | miR-877-5p               | 1 |
| <i>circPTPN13</i>  | miR-9-5p                 | 1 |
| <i>circPTPN13</i>  | miR-937-5p               | 1 |
| <i>circPTPN13</i>  | miR-942-5p               | 1 |
| <i>circPTPN13</i>  | miR-95-5p                | 1 |
| <i>circPTPN13</i>  | miR-96-3p                | 1 |
| <i>circRAPGEF5</i> | miR-100-3p               | 1 |
| <i>circRAPGEF5</i> | miR-103a-2-5p            | 1 |
| <i>circRAPGEF5</i> | miR-1179                 | 1 |
| <i>circRAPGEF5</i> | miR-1197                 | 2 |
| <i>circRAPGEF5</i> | miR-1202/3972            | 1 |
| <i>circRAPGEF5</i> | miR-1207-3p              | 2 |
| <i>circRAPGEF5</i> | miR-1208                 | 1 |
| <i>circRAPGEF5</i> | miR-1224-5p              | 2 |
| <i>circRAPGEF5</i> | miR-1236-5p              | 1 |
| <i>circRAPGEF5</i> | miR-1238-3p              | 2 |
| <i>circRAPGEF5</i> | miR-1243                 | 2 |
| <i>circRAPGEF5</i> | miR-1245a/8079           | 1 |
| <i>circRAPGEF5</i> | miR-1251-3p              | 1 |
| <i>circRAPGEF5</i> | miR-1253                 | 1 |
| <i>circRAPGEF5</i> | miR-1257                 | 1 |
| <i>circRAPGEF5</i> | miR-126-3p.1             | 1 |
| <i>circRAPGEF5</i> | miR-126-5p               | 1 |
| <i>circRAPGEF5</i> | miR-1264                 | 1 |
| <i>circRAPGEF5</i> | miR-1270                 | 1 |
| <i>circRAPGEF5</i> | miR-1273h-3p             | 2 |
| <i>circRAPGEF5</i> | miR-1276                 | 1 |
| <i>circRAPGEF5</i> | miR-1286                 | 1 |
| <i>circRAPGEF5</i> | miR-1288-5p              | 1 |
| <i>circRAPGEF5</i> | miR-1289                 | 1 |
| <i>circRAPGEF5</i> | miR-1298-5p              | 1 |
| <i>circRAPGEF5</i> | miR-130-3p/301-3p/454-3p | 1 |
| <i>circRAPGEF5</i> | miR-1304-5p              | 1 |
| <i>circRAPGEF5</i> | miR-1305                 | 2 |
| <i>circRAPGEF5</i> | miR-133a-5p              | 1 |
| <i>circRAPGEF5</i> | miR-137                  | 1 |
| <i>circRAPGEF5</i> | miR-138-5p               | 1 |
| <i>circRAPGEF5</i> | miR-141-3p/200-3p        | 1 |

|                    |                                      |   |
|--------------------|--------------------------------------|---|
| <i>circRAPGEF5</i> | miR-145-3p                           | 1 |
| <i>circRAPGEF5</i> | miR-145-5p                           | 1 |
| <i>circRAPGEF5</i> | miR-1468-3p                          | 1 |
| <i>circRAPGEF5</i> | miR-146a-3p                          | 2 |
| <i>circRAPGEF5</i> | miR-147b                             | 1 |
| <i>circRAPGEF5</i> | miR-148-3p/152-3p                    | 1 |
| <i>circRAPGEF5</i> | miR-149-5p                           | 1 |
| <i>circRAPGEF5</i> | miR-15-5p/16-5p/195-5p/424-5p/497-5p | 2 |
| <i>circRAPGEF5</i> | miR-151-3p                           | 2 |
| <i>circRAPGEF5</i> | miR-153-5p                           | 1 |
| <i>circRAPGEF5</i> | miR-155-3p                           | 1 |
| <i>circRAPGEF5</i> | miR-15a-3p                           | 1 |
| <i>circRAPGEF5</i> | miR-1825                             | 1 |
| <i>circRAPGEF5</i> | miR-183-3p                           | 1 |
| <i>circRAPGEF5</i> | miR-183-5p.1                         | 1 |
| <i>circRAPGEF5</i> | miR-185-3p                           | 2 |
| <i>circRAPGEF5</i> | miR-185-5p                           | 1 |
| <i>circRAPGEF5</i> | miR-1911-3p                          | 1 |
| <i>circRAPGEF5</i> | miR-192-5p/215-5p                    | 1 |
| <i>circRAPGEF5</i> | miR-193-3p                           | 1 |
| <i>circRAPGEF5</i> | miR-193b-5p                          | 1 |
| <i>circRAPGEF5</i> | miR-196a-3p                          | 1 |
| <i>circRAPGEF5</i> | miR-1972                             | 1 |
| <i>circRAPGEF5</i> | miR-198                              | 1 |
| <i>circRAPGEF5</i> | miR-199-5p                           | 1 |
| <i>circRAPGEF5</i> | miR-203b-3p                          | 1 |
| <i>circRAPGEF5</i> | miR-205-5p                           | 1 |
| <i>circRAPGEF5</i> | miR-208-5p                           | 1 |
| <i>circRAPGEF5</i> | miR-210-3p                           | 1 |
| <i>circRAPGEF5</i> | miR-211-3p                           | 1 |
| <i>circRAPGEF5</i> | miR-2115-3p                          | 2 |
| <i>circRAPGEF5</i> | miR-217                              | 1 |
| <i>circRAPGEF5</i> | miR-22-3p                            | 1 |
| <i>circRAPGEF5</i> | miR-2276-3p                          | 1 |
| <i>circRAPGEF5</i> | miR-2278                             | 1 |
| <i>circRAPGEF5</i> | miR-2467-3p                          | 1 |
| <i>circRAPGEF5</i> | miR-2681-5p                          | 2 |
| <i>circRAPGEF5</i> | miR-2682-3p/6781-3p                  | 2 |

|                    |                           |   |
|--------------------|---------------------------|---|
| <i>circRAPGEF5</i> | miR-28-5p/708-5p          | 1 |
| <i>circRAPGEF5</i> | miR-296-3p                | 1 |
| <i>circRAPGEF5</i> | miR-297                   | 1 |
| <i>circRAPGEF5</i> | miR-301a-5p/301b-5p       | 2 |
| <i>circRAPGEF5</i> | miR-3074-5p               | 1 |
| <i>circRAPGEF5</i> | miR-3117-3p               | 1 |
| <i>circRAPGEF5</i> | miR-3120-5p               | 1 |
| <i>circRAPGEF5</i> | miR-3123                  | 2 |
| <i>circRAPGEF5</i> | miR-3127-5p               | 1 |
| <i>circRAPGEF5</i> | miR-3128                  | 1 |
| <i>circRAPGEF5</i> | miR-3136-3p/7155-3p       | 1 |
| <i>circRAPGEF5</i> | miR-3138                  | 1 |
| <i>circRAPGEF5</i> | miR-3140-3p               | 1 |
| <i>circRAPGEF5</i> | miR-3143                  | 1 |
| <i>circRAPGEF5</i> | miR-3147                  | 1 |
| <i>circRAPGEF5</i> | miR-3149                  | 1 |
| <i>circRAPGEF5</i> | miR-3150a-5p/3150b-5p     | 1 |
| <i>circRAPGEF5</i> | miR-3150b-3p              | 1 |
| <i>circRAPGEF5</i> | miR-3156-5p               | 1 |
| <i>circRAPGEF5</i> | miR-3160-3p               | 2 |
| <i>circRAPGEF5</i> | miR-3161                  | 1 |
| <i>circRAPGEF5</i> | miR-3183/4723-3p/6769b-3p | 1 |
| <i>circRAPGEF5</i> | miR-3184-3p               | 1 |
| <i>circRAPGEF5</i> | miR-3185                  | 4 |
| <i>circRAPGEF5</i> | miR-3187-3p               | 1 |
| <i>circRAPGEF5</i> | miR-3192-3p               | 2 |
| <i>circRAPGEF5</i> | miR-3193                  | 2 |
| <i>circRAPGEF5</i> | miR-3200-3p               | 1 |
| <i>circRAPGEF5</i> | miR-323b-5p/410-5p/494-5p | 1 |
| <i>circRAPGEF5</i> | miR-330-3p.2              | 2 |
| <i>circRAPGEF5</i> | miR-337-3p                | 1 |
| <i>circRAPGEF5</i> | miR-338-3p                | 2 |
| <i>circRAPGEF5</i> | miR-345-5p                | 1 |
| <i>circRAPGEF5</i> | miR-361-5p                | 1 |
| <i>circRAPGEF5</i> | miR-3611                  | 2 |
| <i>circRAPGEF5</i> | miR-3613-5p               | 1 |
| <i>circRAPGEF5</i> | miR-3619-3p               | 2 |
| <i>circRAPGEF5</i> | miR-3622a-5p              | 1 |

|                    |                   |   |
|--------------------|-------------------|---|
| <i>circRAPGEF5</i> | miR-3654          | 2 |
| <i>circRAPGEF5</i> | miR-3662          | 1 |
| <i>circRAPGEF5</i> | miR-3668          | 1 |
| <i>circRAPGEF5</i> | miR-3678-3p       | 2 |
| <i>circRAPGEF5</i> | miR-3678-5p       | 1 |
| <i>circRAPGEF5</i> | miR-3688-5p       | 1 |
| <i>circRAPGEF5</i> | miR-3691-3p       | 1 |
| <i>circRAPGEF5</i> | miR-370-3p        | 1 |
| <i>circRAPGEF5</i> | miR-374a-3p       | 1 |
| <i>circRAPGEF5</i> | miR-374c-3p       | 1 |
| <i>circRAPGEF5</i> | miR-378-3p        | 3 |
| <i>circRAPGEF5</i> | miR-379-5p        | 1 |
| <i>circRAPGEF5</i> | miR-380-3p        | 1 |
| <i>circRAPGEF5</i> | miR-383-5p.1      | 1 |
| <i>circRAPGEF5</i> | miR-383-5p.2      | 1 |
| <i>circRAPGEF5</i> | miR-3915          | 2 |
| <i>circRAPGEF5</i> | miR-3919          | 1 |
| <i>circRAPGEF5</i> | miR-3921/4653-5p  | 2 |
| <i>circRAPGEF5</i> | miR-3925-5p       | 2 |
| <i>circRAPGEF5</i> | miR-3927-5p       | 1 |
| <i>circRAPGEF5</i> | miR-3928-3p       | 1 |
| <i>circRAPGEF5</i> | miR-3936          | 1 |
| <i>circRAPGEF5</i> | miR-3944-5p       | 3 |
| <i>circRAPGEF5</i> | miR-4257          | 1 |
| <i>circRAPGEF5</i> | miR-4266          | 1 |
| <i>circRAPGEF5</i> | miR-4269/6715b-5p | 1 |
| <i>circRAPGEF5</i> | miR-4274          | 1 |
| <i>circRAPGEF5</i> | miR-4279          | 1 |
| <i>circRAPGEF5</i> | miR-4282          | 1 |
| <i>circRAPGEF5</i> | miR-4294          | 1 |
| <i>circRAPGEF5</i> | miR-4307          | 2 |
| <i>circRAPGEF5</i> | miR-4310/7157-5p  | 2 |
| <i>circRAPGEF5</i> | miR-4311          | 1 |
| <i>circRAPGEF5</i> | miR-4318          | 1 |
| <i>circRAPGEF5</i> | miR-4328          | 2 |
| <i>circRAPGEF5</i> | miR-4422          | 2 |
| <i>circRAPGEF5</i> | miR-4425          | 1 |
| <i>circRAPGEF5</i> | miR-4432          | 1 |

|                    |                       |   |
|--------------------|-----------------------|---|
| <i>circRAPGEF5</i> | miR-4433b-3p          | 1 |
| <i>circRAPGEF5</i> | miR-4435              | 1 |
| <i>circRAPGEF5</i> | miR-4451              | 1 |
| <i>circRAPGEF5</i> | miR-4452              | 1 |
| <i>circRAPGEF5</i> | miR-4461              | 1 |
| <i>circRAPGEF5</i> | miR-4463              | 2 |
| <i>circRAPGEF5</i> | miR-4470              | 1 |
| <i>circRAPGEF5</i> | miR-4476/6876-5p      | 2 |
| <i>circRAPGEF5</i> | miR-4487              | 2 |
| <i>circRAPGEF5</i> | miR-4490              | 1 |
| <i>circRAPGEF5</i> | miR-4494              | 1 |
| <i>circRAPGEF5</i> | miR-4499              | 2 |
| <i>circRAPGEF5</i> | miR-4502              | 2 |
| <i>circRAPGEF5</i> | miR-4514/4692         | 1 |
| <i>circRAPGEF5</i> | miR-4519              | 1 |
| <i>circRAPGEF5</i> | miR-4520-3p           | 1 |
| <i>circRAPGEF5</i> | miR-4520-5p           | 2 |
| <i>circRAPGEF5</i> | miR-4522              | 1 |
| <i>circRAPGEF5</i> | miR-4524-5p           | 1 |
| <i>circRAPGEF5</i> | miR-4529-5p           | 1 |
| <i>circRAPGEF5</i> | miR-4530              | 2 |
| <i>circRAPGEF5</i> | miR-4531              | 1 |
| <i>circRAPGEF5</i> | miR-4535              | 2 |
| <i>circRAPGEF5</i> | miR-4633-3p/6500-5p   | 1 |
| <i>circRAPGEF5</i> | miR-4635              | 1 |
| <i>circRAPGEF5</i> | miR-4638-3p           | 3 |
| <i>circRAPGEF5</i> | miR-4642              | 1 |
| <i>circRAPGEF5</i> | miR-4645-5p/4673      | 1 |
| <i>circRAPGEF5</i> | miR-4649-3p           | 1 |
| <i>circRAPGEF5</i> | miR-4650-3p           | 1 |
| <i>circRAPGEF5</i> | miR-4650-5p           | 1 |
| <i>circRAPGEF5</i> | miR-4659a-3p/4659b-3p | 1 |
| <i>circRAPGEF5</i> | miR-4660              | 2 |
| <i>circRAPGEF5</i> | miR-4662a-3p          | 3 |
| <i>circRAPGEF5</i> | miR-4671-5p           | 1 |
| <i>circRAPGEF5</i> | miR-4677-3p           | 2 |
| <i>circRAPGEF5</i> | miR-4679              | 2 |
| <i>circRAPGEF5</i> | miR-4686              | 1 |

|                    |                             |   |
|--------------------|-----------------------------|---|
| <i>circRAPGEF5</i> | miR-4689/6858-5p            | 2 |
| <i>circRAPGEF5</i> | miR-4693-5p                 | 1 |
| <i>circRAPGEF5</i> | miR-4694-3p                 | 1 |
| <i>circRAPGEF5</i> | miR-4698                    | 1 |
| <i>circRAPGEF5</i> | miR-4708-3p                 | 1 |
| <i>circRAPGEF5</i> | miR-4709-3p                 | 1 |
| <i>circRAPGEF5</i> | miR-4720-5p/4799-3p/5588-5p | 1 |
| <i>circRAPGEF5</i> | miR-4722-3p/6727-3p         | 1 |
| <i>circRAPGEF5</i> | miR-4722-5p                 | 1 |
| <i>circRAPGEF5</i> | miR-4724-3p                 | 1 |
| <i>circRAPGEF5</i> | miR-4742-5p                 | 1 |
| <i>circRAPGEF5</i> | miR-4747-3p                 | 1 |
| <i>circRAPGEF5</i> | miR-4750-3p                 | 1 |
| <i>circRAPGEF5</i> | miR-4756-3p                 | 1 |
| <i>circRAPGEF5</i> | miR-4765                    | 1 |
| <i>circRAPGEF5</i> | miR-4769-3p/6817-5p         | 1 |
| <i>circRAPGEF5</i> | miR-4772-3p                 | 1 |
| <i>circRAPGEF5</i> | miR-4772-5p                 | 1 |
| <i>circRAPGEF5</i> | miR-4773                    | 1 |
| <i>circRAPGEF5</i> | miR-4774-5p                 | 1 |
| <i>circRAPGEF5</i> | miR-4776-5p                 | 2 |
| <i>circRAPGEF5</i> | miR-4777-5p                 | 1 |
| <i>circRAPGEF5</i> | miR-4778-3p                 | 1 |
| <i>circRAPGEF5</i> | miR-4790-3p                 | 2 |
| <i>circRAPGEF5</i> | miR-4795-3p                 | 2 |
| <i>circRAPGEF5</i> | miR-4797-5p                 | 1 |
| <i>circRAPGEF5</i> | miR-4800-3p                 | 1 |
| <i>circRAPGEF5</i> | miR-4800-5p                 | 1 |
| <i>circRAPGEF5</i> | miR-4802-3p                 | 1 |
| <i>circRAPGEF5</i> | miR-4802-5p                 | 1 |
| <i>circRAPGEF5</i> | miR-483-3p.1                | 1 |
| <i>circRAPGEF5</i> | miR-488-3p                  | 2 |
| <i>circRAPGEF5</i> | miR-498                     | 3 |
| <i>circRAPGEF5</i> | miR-499b-5p                 | 1 |
| <i>circRAPGEF5</i> | miR-5006-5p                 | 1 |
| <i>circRAPGEF5</i> | miR-500a-5p                 | 1 |
| <i>circRAPGEF5</i> | miR-503-5p                  | 2 |
| <i>circRAPGEF5</i> | miR-509-3-5p/509-5p/4418    | 1 |

|                    |                                      |   |
|--------------------|--------------------------------------|---|
| <i>circRAPGEF5</i> | miR-510-3p                           | 2 |
| <i>circRAPGEF5</i> | miR-510-5p                           | 1 |
| <i>circRAPGEF5</i> | miR-5100                             | 1 |
| <i>circRAPGEF5</i> | miR-518d-5p/519-5p                   | 1 |
| <i>circRAPGEF5</i> | miR-5190                             | 1 |
| <i>circRAPGEF5</i> | miR-5192                             | 1 |
| <i>circRAPGEF5</i> | miR-5197-3p                          | 3 |
| <i>circRAPGEF5</i> | miR-5197-5p                          | 1 |
| <i>circRAPGEF5</i> | miR-520f-5p                          | 1 |
| <i>circRAPGEF5</i> | miR-522-3p                           | 1 |
| <i>circRAPGEF5</i> | miR-548aj-5p/548f-5p/548g-5p/548x-5p | 1 |
| <i>circRAPGEF5</i> | miR-548c-3p                          | 1 |
| <i>circRAPGEF5</i> | miR-548s                             | 1 |
| <i>circRAPGEF5</i> | miR-550a-3-5p/550a-5p/1271-3p        | 1 |
| <i>circRAPGEF5</i> | miR-550b-2-5p                        | 1 |
| <i>circRAPGEF5</i> | miR-5571-5p                          | 2 |
| <i>circRAPGEF5</i> | miR-558                              | 2 |
| <i>circRAPGEF5</i> | miR-5582-5p                          | 1 |
| <i>circRAPGEF5</i> | miR-5586-3p                          | 1 |
| <i>circRAPGEF5</i> | miR-561-5p                           | 1 |
| <i>circRAPGEF5</i> | miR-5684                             | 1 |
| <i>circRAPGEF5</i> | miR-5687                             | 1 |
| <i>circRAPGEF5</i> | miR-5692a                            | 1 |
| <i>circRAPGEF5</i> | miR-5694                             | 1 |
| <i>circRAPGEF5</i> | miR-5696                             | 1 |
| <i>circRAPGEF5</i> | miR-5697                             | 1 |
| <i>circRAPGEF5</i> | miR-578                              | 2 |
| <i>circRAPGEF5</i> | miR-579-3p                           | 1 |
| <i>circRAPGEF5</i> | miR-581                              | 3 |
| <i>circRAPGEF5</i> | miR-583                              | 1 |
| <i>circRAPGEF5</i> | miR-588                              | 1 |
| <i>circRAPGEF5</i> | miR-591                              | 1 |
| <i>circRAPGEF5</i> | miR-593-5p                           | 1 |
| <i>circRAPGEF5</i> | miR-597-5p                           | 1 |
| <i>circRAPGEF5</i> | miR-6077                             | 1 |
| <i>circRAPGEF5</i> | miR-610                              | 1 |
| <i>circRAPGEF5</i> | miR-6131                             | 1 |
| <i>circRAPGEF5</i> | miR-6134                             | 1 |



|                    |                     |   |
|--------------------|---------------------|---|
| <i>circRAPGEF5</i> | miR-616-3p          | 1 |
| <i>circRAPGEF5</i> | miR-621             | 1 |
| <i>circRAPGEF5</i> | miR-629-3p          | 1 |
| <i>circRAPGEF5</i> | miR-629-5p          | 1 |
| <i>circRAPGEF5</i> | miR-631/3661        | 1 |
| <i>circRAPGEF5</i> | miR-634             | 2 |
| <i>circRAPGEF5</i> | miR-643             | 1 |
| <i>circRAPGEF5</i> | miR-646             | 2 |
| <i>circRAPGEF5</i> | miR-6499-3p         | 1 |
| <i>circRAPGEF5</i> | miR-6501-3p         | 1 |
| <i>circRAPGEF5</i> | miR-6507-5p         | 2 |
| <i>circRAPGEF5</i> | miR-6508-5p/8067    | 1 |
| <i>circRAPGEF5</i> | miR-651-3p          | 1 |
| <i>circRAPGEF5</i> | miR-6511-5p         | 1 |
| <i>circRAPGEF5</i> | miR-6514-5p         | 1 |
| <i>circRAPGEF5</i> | miR-656-3p          | 1 |
| <i>circRAPGEF5</i> | miR-664a-5p/4794    | 1 |
| <i>circRAPGEF5</i> | miR-670-3p          | 2 |
| <i>circRAPGEF5</i> | miR-6716-5p         | 1 |
| <i>circRAPGEF5</i> | miR-6747-3p         | 1 |
| <i>circRAPGEF5</i> | miR-675-3p          | 1 |
| <i>circRAPGEF5</i> | miR-6753-5p         | 1 |
| <i>circRAPGEF5</i> | miR-6757-3p         | 1 |
| <i>circRAPGEF5</i> | miR-6758-3p         | 1 |
| <i>circRAPGEF5</i> | miR-6758-5p/6856-5p | 2 |
| <i>circRAPGEF5</i> | miR-676-3p          | 1 |
| <i>circRAPGEF5</i> | miR-6760-3p         | 1 |
| <i>circRAPGEF5</i> | miR-6770-5p         | 1 |
| <i>circRAPGEF5</i> | miR-6780a-3p        | 2 |
| <i>circRAPGEF5</i> | miR-6782-5p         | 1 |
| <i>circRAPGEF5</i> | miR-6801-5p         | 1 |
| <i>circRAPGEF5</i> | miR-6804-3p         | 1 |
| <i>circRAPGEF5</i> | miR-6813-3p         | 1 |
| <i>circRAPGEF5</i> | miR-6815-3p         | 1 |
| <i>circRAPGEF5</i> | miR-6815-5p/6865-5p | 1 |
| <i>circRAPGEF5</i> | miR-6816-3p         | 1 |
| <i>circRAPGEF5</i> | miR-6818-3p         | 1 |
| <i>circRAPGEF5</i> | miR-6819-3p/6877-3p | 1 |

|                    |              |   |
|--------------------|--------------|---|
| <i>circRAPGEF5</i> | miR-6821-5p  | 1 |
| <i>circRAPGEF5</i> | miR-6823-5p  | 1 |
| <i>circRAPGEF5</i> | miR-6827-5p  | 1 |
| <i>circRAPGEF5</i> | miR-6830-5p  | 1 |
| <i>circRAPGEF5</i> | miR-6836-3p  | 1 |
| <i>circRAPGEF5</i> | miR-6847-5p  | 1 |
| <i>circRAPGEF5</i> | miR-6853-5p  | 1 |
| <i>circRAPGEF5</i> | miR-6868-5p  | 1 |
| <i>circRAPGEF5</i> | miR-6870-3p  | 1 |
| <i>circRAPGEF5</i> | miR-6871-5p  | 1 |
| <i>circRAPGEF5</i> | miR-6875-3p  | 1 |
| <i>circRAPGEF5</i> | miR-6881-3p  | 2 |
| <i>circRAPGEF5</i> | miR-6888-3p  | 1 |
| <i>circRAPGEF5</i> | miR-7-5p     | 1 |
| <i>circRAPGEF5</i> | miR-7111-3p  | 2 |
| <i>circRAPGEF5</i> | miR-7152-5p  | 1 |
| <i>circRAPGEF5</i> | miR-7158-3p  | 1 |
| <i>circRAPGEF5</i> | miR-7161-3p  | 1 |
| <i>circRAPGEF5</i> | miR-7162-3p  | 1 |
| <i>circRAPGEF5</i> | miR-759      | 1 |
| <i>circRAPGEF5</i> | miR-7852-3p  | 1 |
| <i>circRAPGEF5</i> | miR-7854-3p  | 1 |
| <i>circRAPGEF5</i> | miR-8062     | 1 |
| <i>circRAPGEF5</i> | miR-8063     | 1 |
| <i>circRAPGEF5</i> | miR-8074     | 1 |
| <i>circRAPGEF5</i> | miR-8080     | 1 |
| <i>circRAPGEF5</i> | miR-8087     | 1 |
| <i>circRAPGEF5</i> | miR-873-5p.1 | 1 |
| <i>circRAPGEF5</i> | miR-873-5p.2 | 1 |
| <i>circRAPGEF5</i> | miR-891a-3p  | 1 |
| <i>circRAPGEF5</i> | miR-891b     | 2 |
| <i>circRAPGEF5</i> | miR-892a     | 1 |
| <i>circRAPGEF5</i> | miR-924      | 1 |
| <i>circRAPGEF5</i> | miR-935      | 2 |
| <i>circRAPGEF5</i> | miR-944      | 1 |
| <i>circRAPGEF5</i> | miR-1287-5p  | 1 |
| <i>circRAPGEF5</i> | miR-3135b    | 1 |
| <i>circRAPGEF5</i> | miR-3692-5p  | 1 |

|                    |                     |   |
|--------------------|---------------------|---|
| <i>circRAPGEF5</i> | miR-6071            | 1 |
| <i>circRAPGEF5</i> | miR-6828-3p         | 1 |
| <i>circRAPGEF5</i> | miR-6843-3p/6848-3p | 1 |
| <i>circRAPGEF5</i> | miR-93-3p           | 1 |
| <i>circRAPGEF5</i> | miR-151-5p          | 1 |
| <i>circRAPGEF5</i> | miR-299-3p          | 1 |
| <i>circRAPGEF5</i> | miR-4491/4657       | 1 |
| <i>circRAPGEF5</i> | miR-4752            | 1 |
| <i>circRAPGEF5</i> | miR-611/3131        | 1 |
| <i>circRAPGEF5</i> | miR-6833-5p         | 1 |
| <i>circRAPGEF5</i> | miR-8066            | 1 |
| <i>circRAPGEF5</i> | miR-887-3p          | 1 |
| <i>circREPS2</i>   | miR-101-3p.1        | 2 |
| <i>circREPS2</i>   | miR-103-3p/107      | 3 |
| <i>circREPS2</i>   | miR-105-5p          | 2 |
| <i>circREPS2</i>   | miR-1184            | 4 |
| <i>circREPS2</i>   | miR-1185-5p         | 1 |
| <i>circREPS2</i>   | miR-1205            | 4 |
| <i>circREPS2</i>   | miR-1207-3p         | 2 |
| <i>circREPS2</i>   | miR-1224-5p         | 1 |
| <i>circREPS2</i>   | miR-1229-3p         | 2 |
| <i>circREPS2</i>   | miR-1233-5p/6778-5p | 2 |
| <i>circREPS2</i>   | miR-124-5p          | 3 |
| <i>circREPS2</i>   | miR-1249-5p/6797-5p | 2 |
| <i>circREPS2</i>   | miR-125-5p          | 3 |
| <i>circREPS2</i>   | miR-1251-3p         | 1 |
| <i>circREPS2</i>   | miR-1252-3p         | 5 |
| <i>circREPS2</i>   | miR-1252-5p         | 6 |
| <i>circREPS2</i>   | miR-126-3p.1        | 1 |
| <i>circREPS2</i>   | miR-126-3p.2        | 1 |
| <i>circREPS2</i>   | miR-1266-3p         | 1 |
| <i>circREPS2</i>   | miR-1285-5p         | 2 |
| <i>circREPS2</i>   | miR-1287-5p         | 4 |
| <i>circREPS2</i>   | miR-1291/6775-3p    | 1 |
| <i>circREPS2</i>   | miR-1298-5p         | 2 |
| <i>circREPS2</i>   | miR-1299            | 2 |
| <i>circREPS2</i>   | miR-1301-3p         | 4 |
| <i>circREPS2</i>   | miR-132-3p/212-3p   | 1 |

|                  |                                    |   |
|------------------|------------------------------------|---|
| <i>circREPS2</i> | miR-1343-3p                        | 1 |
| <i>circREPS2</i> | miR-135-5p                         | 2 |
| <i>circREPS2</i> | miR-136-3p                         | 2 |
| <i>circREPS2</i> | miR-144-3p                         | 2 |
| <i>circREPS2</i> | miR-145-3p                         | 2 |
| <i>circREPS2</i> | miR-146b-3p                        | 2 |
| <i>circREPS2</i> | miR-149-3p/4728-5p/6785-5p/6883-5p | 3 |
| <i>circREPS2</i> | miR-1537-5p                        | 2 |
| <i>circREPS2</i> | miR-154-3p/487-3p                  | 2 |
| <i>circREPS2</i> | miR-15b-3p                         | 1 |
| <i>circREPS2</i> | miR-17-3p                          | 4 |
| <i>circREPS2</i> | miR-18-5p                          | 1 |
| <i>circREPS2</i> | miR-182-3p                         | 1 |
| <i>circREPS2</i> | miR-1827                           | 4 |
| <i>circREPS2</i> | miR-188-5p                         | 1 |
| <i>circREPS2</i> | miR-1908-5p                        | 2 |
| <i>circREPS2</i> | miR-191-3p                         | 2 |
| <i>circREPS2</i> | miR-1910-3p/6511a-5p               | 2 |
| <i>circREPS2</i> | miR-197-3p                         | 2 |
| <i>circREPS2</i> | miR-199-3p                         | 1 |
| <i>circREPS2</i> | miR-200-3p/429                     | 1 |
| <i>circREPS2</i> | miR-205-3p                         | 1 |
| <i>circREPS2</i> | miR-20b-3p                         | 4 |
| <i>circREPS2</i> | miR-218-1-3p                       | 1 |
| <i>circREPS2</i> | miR-218-2-3p                       | 1 |
| <i>circREPS2</i> | miR-218-5p                         | 1 |
| <i>circREPS2</i> | miR-219-5p                         | 1 |
| <i>circREPS2</i> | miR-221-3p/222-3p                  | 2 |
| <i>circREPS2</i> | miR-2276-5p                        | 2 |
| <i>circREPS2</i> | miR-23-3p                          | 1 |
| <i>circREPS2</i> | miR-23-5p                          | 3 |
| <i>circREPS2</i> | miR-2392                           | 2 |
| <i>circREPS2</i> | miR-24-3p                          | 4 |
| <i>circREPS2</i> | miR-24-5p                          | 2 |
| <i>circREPS2</i> | miR-2467-3p                        | 2 |
| <i>circREPS2</i> | miR-26b-3p                         | 3 |
| <i>circREPS2</i> | miR-27a-5p                         | 1 |
| <i>circREPS2</i> | miR-296-5p                         | 1 |

|                  |                                              |   |
|------------------|----------------------------------------------|---|
| <i>circREPS2</i> | miR-29b-1-5p                                 | 1 |
| <i>circREPS2</i> | miR-30-3p                                    | 1 |
| <i>circREPS2</i> | miR-3074-5p                                  | 2 |
| <i>circREPS2</i> | miR-30b-3p/1273h-5p/3689-3p/6779-5p/6780a-5p | 2 |
| <i>circREPS2</i> | miR-30c-3p/6788-5p                           | 2 |
| <i>circREPS2</i> | miR-3127-5p                                  | 1 |
| <i>circREPS2</i> | miR-3135a                                    | 1 |
| <i>circREPS2</i> | miR-3135b                                    | 4 |
| <i>circREPS2</i> | miR-3137                                     | 4 |
| <i>circREPS2</i> | miR-3154                                     | 2 |
| <i>circREPS2</i> | miR-3158-5p                                  | 4 |
| <i>circREPS2</i> | miR-3173-3p/6891-5p                          | 5 |
| <i>circREPS2</i> | miR-3173-5p                                  | 2 |
| <i>circREPS2</i> | miR-3175                                     | 2 |
| <i>circREPS2</i> | miR-3179                                     | 1 |
| <i>circREPS2</i> | miR-3181                                     | 1 |
| <i>circREPS2</i> | miR-3185                                     | 2 |
| <i>circREPS2</i> | miR-3193                                     | 1 |
| <i>circREPS2</i> | miR-3197                                     | 4 |
| <i>circREPS2</i> | miR-3200-5p                                  | 3 |
| <i>circREPS2</i> | miR-320e                                     | 4 |
| <i>circREPS2</i> | miR-326                                      | 2 |
| <i>circREPS2</i> | miR-331-3p                                   | 1 |
| <i>circREPS2</i> | miR-342-5p/4664-5p                           | 2 |
| <i>circREPS2</i> | miR-34b-5p/449c-5p                           | 2 |
| <i>circREPS2</i> | miR-3605-5p                                  | 1 |
| <i>circREPS2</i> | miR-3607-3p                                  | 1 |
| <i>circREPS2</i> | miR-3612                                     | 3 |
| <i>circREPS2</i> | miR-3619-3p                                  | 1 |
| <i>circREPS2</i> | miR-3646                                     | 5 |
| <i>circREPS2</i> | miR-3652/4430                                | 3 |
| <i>circREPS2</i> | miR-3671                                     | 1 |
| <i>circREPS2</i> | miR-3677-3p                                  | 2 |
| <i>circREPS2</i> | miR-3678-5p                                  | 1 |
| <i>circREPS2</i> | miR-3680-3p                                  | 1 |
| <i>circREPS2</i> | miR-3686                                     | 2 |
| <i>circREPS2</i> | miR-3688-3p                                  | 3 |
| <i>circREPS2</i> | miR-3692-5p                                  | 6 |

|                  |                                              |   |
|------------------|----------------------------------------------|---|
| <i>circREPS2</i> | miR-370-3p                                   | 2 |
| <i>circREPS2</i> | miR-374-5p/655-3p                            | 2 |
| <i>circREPS2</i> | miR-378-3p                                   | 2 |
| <i>circREPS2</i> | miR-378g                                     | 1 |
| <i>circREPS2</i> | miR-378j/6839-5p                             | 2 |
| <i>circREPS2</i> | miR-381-5p                                   | 4 |
| <i>circREPS2</i> | miR-382-3p                                   | 2 |
| <i>circREPS2</i> | miR-3907                                     | 1 |
| <i>circREPS2</i> | miR-3908                                     | 1 |
| <i>circREPS2</i> | miR-3913-3p                                  | 4 |
| <i>circREPS2</i> | miR-3915                                     | 1 |
| <i>circREPS2</i> | miR-3918                                     | 1 |
| <i>circREPS2</i> | miR-3928-5p/6806-3p                          | 1 |
| <i>circREPS2</i> | miR-3934-3p                                  | 2 |
| <i>circREPS2</i> | miR-3935                                     | 1 |
| <i>circREPS2</i> | miR-3936                                     | 2 |
| <i>circREPS2</i> | miR-3940-5p/4507                             | 2 |
| <i>circREPS2</i> | miR-3942-5p                                  | 1 |
| <i>circREPS2</i> | miR-3944-3p                                  | 1 |
| <i>circREPS2</i> | miR-411-5p.1                                 | 1 |
| <i>circREPS2</i> | miR-423-5p                                   | 4 |
| <i>circREPS2</i> | miR-4257                                     | 2 |
| <i>circREPS2</i> | miR-4271/4725-3p/6780b-5p                    | 2 |
| <i>circREPS2</i> | miR-4273/7156-5p                             | 2 |
| <i>circREPS2</i> | miR-4275                                     | 2 |
| <i>circREPS2</i> | miR-4283                                     | 3 |
| <i>circREPS2</i> | miR-4284                                     | 4 |
| <i>circREPS2</i> | miR-4293                                     | 2 |
| <i>circREPS2</i> | miR-4313                                     | 1 |
| <i>circREPS2</i> | miR-4315                                     | 1 |
| <i>circREPS2</i> | miR-4318                                     | 3 |
| <i>circREPS2</i> | miR-432-3p                                   | 2 |
| <i>circREPS2</i> | miR-4326                                     | 1 |
| <i>circREPS2</i> | miR-4328                                     | 2 |
| <i>circREPS2</i> | miR-4428                                     | 5 |
| <i>circREPS2</i> | miR-4436b-3p/4632-5p/6735-5p/6879-5p/7843-5p | 7 |
| <i>circREPS2</i> | miR-4445-5p                                  | 1 |
| <i>circREPS2</i> | miR-4446-5p                                  | 1 |

|                  |                   |   |
|------------------|-------------------|---|
| <i>circREPS2</i> | miR-4463          | 5 |
| <i>circREPS2</i> | miR-4475          | 1 |
| <i>circREPS2</i> | miR-4486          | 1 |
| <i>circREPS2</i> | miR-4489          | 3 |
| <i>circREPS2</i> | miR-4490          | 2 |
| <i>circREPS2</i> | miR-4495          | 1 |
| <i>circREPS2</i> | miR-4499          | 5 |
| <i>circREPS2</i> | miR-4502          | 2 |
| <i>circREPS2</i> | miR-4504          | 2 |
| <i>circREPS2</i> | miR-4505/5787     | 3 |
| <i>circREPS2</i> | miR-450b-5p       | 1 |
| <i>circREPS2</i> | miR-4517          | 2 |
| <i>circREPS2</i> | miR-452-5p/892-3p | 4 |
| <i>circREPS2</i> | miR-4520-2-3p     | 1 |
| <i>circREPS2</i> | miR-4520-3p       | 1 |
| <i>circREPS2</i> | miR-4529-3p       | 1 |
| <i>circREPS2</i> | miR-4535          | 2 |
| <i>circREPS2</i> | miR-4539          | 4 |
| <i>circREPS2</i> | miR-4638-3p       | 2 |
| <i>circREPS2</i> | miR-4643          | 1 |
| <i>circREPS2</i> | miR-4648          | 2 |
| <i>circREPS2</i> | miR-4652-3p       | 5 |
| <i>circREPS2</i> | miR-4654/4769-5p  | 2 |
| <i>circREPS2</i> | miR-4655-3p       | 1 |
| <i>circREPS2</i> | miR-4655-5p       | 1 |
| <i>circREPS2</i> | miR-4656          | 3 |
| <i>circREPS2</i> | miR-4660          | 2 |
| <i>circREPS2</i> | miR-4661-3p       | 1 |
| <i>circREPS2</i> | miR-4662-5p       | 3 |
| <i>circREPS2</i> | miR-4666a-5p      | 1 |
| <i>circREPS2</i> | miR-4671-5p       | 1 |
| <i>circREPS2</i> | miR-4675/4741     | 3 |
| <i>circREPS2</i> | miR-4677-5p       | 2 |
| <i>circREPS2</i> | miR-4684-5p       | 1 |
| <i>circREPS2</i> | miR-4688/6743-5p  | 2 |
| <i>circREPS2</i> | miR-4689/6858-5p  | 1 |
| <i>circREPS2</i> | miR-4695-5p       | 2 |
| <i>circREPS2</i> | miR-4698          | 4 |

|                  |                     |   |
|------------------|---------------------|---|
| <i>circREPS2</i> | miR-4706/4749-5p    | 2 |
| <i>circREPS2</i> | miR-4710            | 1 |
| <i>circREPS2</i> | miR-4717-5p         | 1 |
| <i>circREPS2</i> | miR-4718            | 2 |
| <i>circREPS2</i> | miR-4729            | 5 |
| <i>circREPS2</i> | miR-4731-5p         | 3 |
| <i>circREPS2</i> | miR-4732-3p         | 3 |
| <i>circREPS2</i> | miR-4743-3p         | 5 |
| <i>circREPS2</i> | miR-4747-3p         | 1 |
| <i>circREPS2</i> | miR-4747-5p/5196-5p | 3 |
| <i>circREPS2</i> | miR-4750-5p         | 1 |
| <i>circREPS2</i> | miR-4760-3p         | 2 |
| <i>circREPS2</i> | miR-4761-3p         | 3 |
| <i>circREPS2</i> | miR-4762-5p         | 2 |
| <i>circREPS2</i> | miR-4774-5p         | 2 |
| <i>circREPS2</i> | miR-4775            | 1 |
| <i>circREPS2</i> | miR-4776-5p         | 2 |
| <i>circREPS2</i> | miR-4778-5p         | 1 |
| <i>circREPS2</i> | miR-4779            | 2 |
| <i>circREPS2</i> | miR-4782-5p/5706    | 2 |
| <i>circREPS2</i> | miR-4786-3p         | 1 |
| <i>circREPS2</i> | miR-4789-3p         | 1 |
| <i>circREPS2</i> | miR-4792            | 1 |
| <i>circREPS2</i> | miR-4800-3p         | 1 |
| <i>circREPS2</i> | miR-487-3p          | 2 |
| <i>circREPS2</i> | miR-488-5p          | 1 |
| <i>circREPS2</i> | miR-489-3p          | 4 |
| <i>circREPS2</i> | miR-495-3p          | 4 |
| <i>circREPS2</i> | miR-4999-5p         | 2 |
| <i>circREPS2</i> | miR-499a-3p/499b-3p | 2 |
| <i>circREPS2</i> | miR-5008-5p         | 2 |
| <i>circREPS2</i> | miR-500a-3p         | 1 |
| <i>circREPS2</i> | miR-504-3p          | 2 |
| <i>circREPS2</i> | miR-505-5p          | 2 |
| <i>circREPS2</i> | miR-507/557         | 1 |
| <i>circREPS2</i> | miR-508-3p          | 1 |
| <i>circREPS2</i> | miR-5089-3p         | 2 |
| <i>circREPS2</i> | miR-514a-3p         | 2 |



|                  |                                               |   |
|------------------|-----------------------------------------------|---|
| <i>circREPS2</i> | miR-516b-5p                                   | 2 |
| <i>circREPS2</i> | miR-518-3p                                    | 2 |
| <i>circREPS2</i> | miR-5186                                      | 3 |
| <i>circREPS2</i> | miR-518c-5p                                   | 2 |
| <i>circREPS2</i> | miR-5194                                      | 4 |
| <i>circREPS2</i> | miR-542-3p                                    | 2 |
| <i>circREPS2</i> | miR-544a                                      | 2 |
| <i>circREPS2</i> | miR-548av-3p                                  | 2 |
| <i>circREPS2</i> | miR-548az-3p/548ar-3p/548a-3p/548e-3p/548f-3p |   |
| <i>circREPS2</i> | miR-548v                                      | 2 |
| <i>circREPS2</i> | miR-5571-5p                                   | 2 |
| <i>circREPS2</i> | miR-5579-3p                                   | 1 |
| <i>circREPS2</i> | miR-5581-3p                                   | 2 |
| <i>circREPS2</i> | miR-5582-3p                                   | 1 |
| <i>circREPS2</i> | miR-5583-3p                                   | 2 |
| <i>circREPS2</i> | miR-5584-5p                                   | 1 |
| <i>circREPS2</i> | miR-5587-5p                                   | 1 |
| <i>circREPS2</i> | miR-5589-5p                                   | 3 |
| <i>circREPS2</i> | miR-561-5p                                    | 2 |
| <i>circREPS2</i> | miR-5692a                                     | 6 |
| <i>circREPS2</i> | miR-582-3p                                    | 2 |
| <i>circREPS2</i> | miR-584-3p                                    | 4 |
| <i>circREPS2</i> | miR-586                                       | 2 |
| <i>circREPS2</i> | miR-587                                       | 2 |
| <i>circREPS2</i> | miR-590-3p                                    | 2 |
| <i>circREPS2</i> | miR-593-5p                                    | 2 |
| <i>circREPS2</i> | miR-596                                       | 2 |
| <i>circREPS2</i> | miR-604                                       | 1 |
| <i>circREPS2</i> | miR-6072/6891-3p                              | 2 |
| <i>circREPS2</i> | miR-6077                                      | 5 |
| <i>circREPS2</i> | miR-6079                                      | 6 |
| <i>circREPS2</i> | miR-608/4651                                  | 2 |
| <i>circREPS2</i> | miR-6085/6813-5p                              | 2 |
| <i>circREPS2</i> | miR-6087                                      | 4 |
| <i>circREPS2</i> | miR-6089                                      | 2 |
| <i>circREPS2</i> | miR-612/1285-3p/3187-5p/5189-5p/6860          | 1 |
| <i>circREPS2</i> | miR-6126                                      | 4 |
| <i>circREPS2</i> | miR-6128                                      | 2 |

|                  |                     |   |
|------------------|---------------------|---|
| <i>circREPS2</i> | miR-624-3p          | 3 |
| <i>circREPS2</i> | miR-642a-5p         | 2 |
| <i>circREPS2</i> | miR-642b-5p         | 2 |
| <i>circREPS2</i> | miR-6505-5p         | 2 |
| <i>circREPS2</i> | miR-6506-3p         | 2 |
| <i>circREPS2</i> | miR-651-3p          | 2 |
| <i>circREPS2</i> | miR-6511-3p         | 2 |
| <i>circREPS2</i> | miR-652-5p          | 1 |
| <i>circREPS2</i> | miR-659-3p          | 3 |
| <i>circREPS2</i> | miR-671-5p          | 2 |
| <i>circREPS2</i> | miR-6724-5p/6773-5p | 2 |
| <i>circREPS2</i> | miR-6731-5p/8085    | 2 |
| <i>circREPS2</i> | miR-6736-3p         | 2 |
| <i>circREPS2</i> | miR-6738-3p         | 2 |
| <i>circREPS2</i> | miR-6742-3p         | 2 |
| <i>circREPS2</i> | miR-6746-5p         | 1 |
| <i>circREPS2</i> | miR-6747-5p         | 2 |
| <i>circREPS2</i> | miR-6750-5p/6822-5p | 1 |
| <i>circREPS2</i> | miR-6752-3p         | 1 |
| <i>circREPS2</i> | miR-6762-3p         | 1 |
| <i>circREPS2</i> | miR-6764-3p/6824-3p | 2 |
| <i>circREPS2</i> | miR-6765-5p         | 3 |
| <i>circREPS2</i> | miR-6772-3p         | 2 |
| <i>circREPS2</i> | miR-6776-5p         | 2 |
| <i>circREPS2</i> | miR-6777-5p/6889-5p | 2 |
| <i>circREPS2</i> | miR-6782-5p         | 2 |
| <i>circREPS2</i> | miR-6783-5p         | 2 |
| <i>circREPS2</i> | miR-6784-3p/6862-3p | 2 |
| <i>circREPS2</i> | miR-6787-3p         | 2 |
| <i>circREPS2</i> | miR-6799-5p         | 3 |
| <i>circREPS2</i> | miR-6801-3p/6810-3p | 1 |
| <i>circREPS2</i> | miR-6801-5p         | 3 |
| <i>circREPS2</i> | miR-6803-3p         | 1 |
| <i>circREPS2</i> | miR-6817-3p         | 1 |
| <i>circREPS2</i> | miR-6825-5p         | 2 |
| <i>circREPS2</i> | miR-6828-5p         | 2 |
| <i>circREPS2</i> | miR-6829-5p         | 3 |
| <i>circREPS2</i> | miR-6839-3p         | 2 |

|                  |                           |   |
|------------------|---------------------------|---|
| <i>circREPS2</i> | miR-6844                  | 2 |
| <i>circREPS2</i> | miR-6847-5p               | 2 |
| <i>circREPS2</i> | miR-6851-3p               | 1 |
| <i>circREPS2</i> | miR-6852-5p               | 2 |
| <i>circREPS2</i> | miR-6854-5p               | 2 |
| <i>circREPS2</i> | miR-6861-5p               | 2 |
| <i>circREPS2</i> | miR-6864-5p               | 4 |
| <i>circREPS2</i> | miR-6865-3p               | 2 |
| <i>circREPS2</i> | miR-6870-3p               | 2 |
| <i>circREPS2</i> | miR-6872-3p               | 2 |
| <i>circREPS2</i> | miR-6878-5p               | 2 |
| <i>circREPS2</i> | miR-6882-3p               | 1 |
| <i>circREPS2</i> | miR-6884-3p               | 2 |
| <i>circREPS2</i> | miR-6885-3p               | 3 |
| <i>circREPS2</i> | miR-6886-5p               | 2 |
| <i>circREPS2</i> | miR-6892-3p               | 2 |
| <i>circREPS2</i> | miR-6892-5p               | 1 |
| <i>circREPS2</i> | miR-7-5p                  | 5 |
| <i>circREPS2</i> | miR-7106-5p               | 3 |
| <i>circREPS2</i> | miR-7109-3p               | 1 |
| <i>circREPS2</i> | miR-7110-3p               | 1 |
| <i>circREPS2</i> | miR-7152-5p               | 2 |
| <i>circREPS2</i> | miR-7156-3p               | 4 |
| <i>circREPS2</i> | miR-7158-5p               | 2 |
| <i>circREPS2</i> | miR-744-5p                | 2 |
| <i>circREPS2</i> | miR-7515                  | 1 |
| <i>circREPS2</i> | miR-762/4492/4498/5001-5p | 3 |
| <i>circREPS2</i> | miR-767-3p                | 2 |
| <i>circREPS2</i> | miR-7855-5p               | 1 |
| <i>circREPS2</i> | miR-7976                  | 2 |
| <i>circREPS2</i> | miR-8057                  | 4 |
| <i>circREPS2</i> | miR-8063                  | 4 |
| <i>circREPS2</i> | miR-8069                  | 3 |
| <i>circREPS2</i> | miR-8076                  | 2 |
| <i>circREPS2</i> | miR-8084                  | 1 |
| <i>circREPS2</i> | miR-873-3p                | 2 |
| <i>circREPS2</i> | miR-874-5p                | 1 |
| <i>circREPS2</i> | miR-889-5p                | 2 |

|                  |                         |   |
|------------------|-------------------------|---|
| <i>circREPS2</i> | miR-892a                | 3 |
| <i>circREPS2</i> | miR-9-3p                | 2 |
| <i>circREPS2</i> | miR-93-3p               | 6 |
| <i>circREPS2</i> | miR-936                 | 1 |
| <i>circREPS2</i> | miR-939-3p              | 2 |
| <i>circREPS2</i> | miR-939-5p/1343-5p      | 2 |
| <i>circREPS2</i> | miR-940/6808-5p/6893-5p | 2 |
| <i>circREPS2</i> | miR-9500                | 1 |
| <i>circREPS2</i> | let-7a-2-3p/let-7g-3p   | 3 |
| <i>circREPS2</i> | let-7c-3p               | 3 |
| <i>circREPS2</i> | miR-1-3p/206            | 2 |
| <i>circREPS2</i> | miR-101-3p.2            | 2 |
| <i>circREPS2</i> | miR-106a-3p             | 2 |
| <i>circREPS2</i> | miR-10a-3p              | 2 |
| <i>circREPS2</i> | miR-10b-3p              | 1 |
| <i>circREPS2</i> | miR-1178-3p             | 1 |
| <i>circREPS2</i> | miR-1178-5p             | 2 |
| <i>circREPS2</i> | miR-1179                | 1 |
| <i>circREPS2</i> | miR-1180-5p             | 1 |
| <i>circREPS2</i> | miR-1182                | 2 |
| <i>circREPS2</i> | miR-1183                | 2 |
| <i>circREPS2</i> | miR-1200                | 1 |
| <i>circREPS2</i> | miR-1202/3972           | 2 |
| <i>circREPS2</i> | miR-1207-5p/4763-3p     | 1 |
| <i>circREPS2</i> | miR-1208                | 3 |
| <i>circREPS2</i> | miR-122-5p              | 2 |
| <i>circREPS2</i> | miR-1225-3p             | 3 |
| <i>circREPS2</i> | miR-1226-3p             | 2 |
| <i>circREPS2</i> | miR-1226-5p             | 3 |
| <i>circREPS2</i> | miR-1227-3p             | 1 |
| <i>circREPS2</i> | miR-1227-5p             | 1 |
| <i>circREPS2</i> | miR-1228-3p             | 1 |
| <i>circREPS2</i> | miR-1228-5p             | 1 |
| <i>circREPS2</i> | miR-1231                | 2 |
| <i>circREPS2</i> | miR-1233-3p             | 1 |
| <i>circREPS2</i> | miR-1234-3p/7107-5p     | 1 |
| <i>circREPS2</i> | miR-1236-3p             | 1 |
| <i>circREPS2</i> | miR-1236-5p             | 3 |

|                  |                          |   |
|------------------|--------------------------|---|
| <i>circREPS2</i> | miR-1237-3p              | 3 |
| <i>circREPS2</i> | miR-1243                 | 1 |
| <i>circREPS2</i> | miR-1245a/8079           | 2 |
| <i>circREPS2</i> | miR-1245b-3p             | 1 |
| <i>circREPS2</i> | miR-1245b-5p             | 1 |
| <i>circREPS2</i> | miR-1246                 | 1 |
| <i>circREPS2</i> | miR-1247-3p              | 1 |
| <i>circREPS2</i> | miR-1248                 | 3 |
| <i>circREPS2</i> | miR-1250-3p              | 2 |
| <i>circREPS2</i> | miR-1253                 | 1 |
| <i>circREPS2</i> | miR-1254/3116            | 2 |
| <i>circREPS2</i> | miR-1255a/1255b-5p       | 4 |
| <i>circREPS2</i> | miR-1255b-2-3p           | 2 |
| <i>circREPS2</i> | miR-1256                 | 1 |
| <i>circREPS2</i> | miR-1257                 | 4 |
| <i>circREPS2</i> | miR-125a-3p              | 3 |
| <i>circREPS2</i> | miR-126-5p               | 6 |
| <i>circREPS2</i> | miR-1260a/1260b          | 2 |
| <i>circREPS2</i> | miR-1261                 | 2 |
| <i>circREPS2</i> | miR-1262/4701-3p/6736-5p | 3 |
| <i>circREPS2</i> | miR-1264                 | 1 |
| <i>circREPS2</i> | miR-1265                 | 2 |
| <i>circREPS2</i> | miR-1266-5p/4518         | 2 |
| <i>circREPS2</i> | miR-1267                 | 1 |
| <i>circREPS2</i> | miR-1268a/1268b          | 1 |
| <i>circREPS2</i> | miR-1269                 | 4 |
| <i>circREPS2</i> | miR-127-5p               | 1 |
| <i>circREPS2</i> | miR-1270                 | 3 |
| <i>circREPS2</i> | miR-1272                 | 1 |
| <i>circREPS2</i> | miR-1273a                | 1 |
| <i>circREPS2</i> | miR-1273g-3p             | 3 |
| <i>circREPS2</i> | miR-1273g-5p             | 2 |
| <i>circREPS2</i> | miR-1273h-3p             | 1 |
| <i>circREPS2</i> | miR-1275/4665-5p         | 2 |
| <i>circREPS2</i> | miR-1276                 | 4 |
| <i>circREPS2</i> | miR-1277-5p              | 3 |
| <i>circREPS2</i> | miR-1279                 | 2 |
| <i>circREPS2</i> | miR-1282                 | 2 |

|                  |                          |   |
|------------------|--------------------------|---|
| <i>circREPS2</i> | miR-1283                 | 5 |
| <i>circREPS2</i> | miR-1284                 | 1 |
| <i>circREPS2</i> | miR-1286                 | 1 |
| <i>circREPS2</i> | miR-1288-3p              | 3 |
| <i>circREPS2</i> | miR-1288-5p              | 1 |
| <i>circREPS2</i> | miR-129-5p               | 3 |
| <i>circREPS2</i> | miR-1292-5p              | 1 |
| <i>circREPS2</i> | miR-1295b-3p             | 1 |
| <i>circREPS2</i> | miR-1296-3p              | 1 |
| <i>circREPS2</i> | miR-130-3p/301-3p/454-3p | 1 |
| <i>circREPS2</i> | miR-1302/4298            | 1 |
| <i>circREPS2</i> | miR-1303                 | 2 |
| <i>circREPS2</i> | miR-1304-3p              | 4 |
| <i>circREPS2</i> | miR-1304-5p              | 3 |
| <i>circREPS2</i> | miR-1305                 | 2 |
| <i>circREPS2</i> | miR-1307-3p              | 1 |
| <i>circREPS2</i> | miR-130b-5p              | 4 |
| <i>circREPS2</i> | miR-1322                 | 1 |
| <i>circREPS2</i> | miR-1323                 | 2 |
| <i>circREPS2</i> | miR-133a-5p              | 1 |
| <i>circREPS2</i> | miR-134-3p               | 2 |
| <i>circREPS2</i> | miR-135a-3p              | 1 |
| <i>circREPS2</i> | miR-136-5p               | 2 |
| <i>circREPS2</i> | miR-137                  | 1 |
| <i>circREPS2</i> | miR-138-1-3p             | 1 |
| <i>circREPS2</i> | miR-138-5p               | 1 |
| <i>circREPS2</i> | miR-139-3p               | 4 |
| <i>circREPS2</i> | miR-140-3p.1             | 5 |
| <i>circREPS2</i> | miR-140-3p.2             | 3 |
| <i>circREPS2</i> | miR-140-5p               | 2 |
| <i>circREPS2</i> | miR-141-3p/200-3p        | 1 |
| <i>circREPS2</i> | miR-141-5p               | 1 |
| <i>circREPS2</i> | miR-142-5p               | 1 |
| <i>circREPS2</i> | miR-143-5p               | 3 |
| <i>circREPS2</i> | miR-1468-3p              | 3 |
| <i>circREPS2</i> | miR-146a-3p              | 4 |
| <i>circREPS2</i> | miR-1470                 | 2 |
| <i>circREPS2</i> | miR-147a                 | 4 |

|                  |                                      |   |
|------------------|--------------------------------------|---|
| <i>circREPS2</i> | miR-148-3p/152-3p                    | 1 |
| <i>circREPS2</i> | miR-148a-5p                          | 3 |
| <i>circREPS2</i> | miR-148b-5p/6874-3p                  | 3 |
| <i>circREPS2</i> | miR-15-5p/16-5p/195-5p/424-5p/497-5p | 1 |
| <i>circREPS2</i> | miR-150-5p                           | 1 |
| <i>circREPS2</i> | miR-152-5p                           | 1 |
| <i>circREPS2</i> | miR-153-3p                           | 1 |
| <i>circREPS2</i> | miR-1537-3p                          | 1 |
| <i>circREPS2</i> | miR-155-3p                           | 2 |
| <i>circREPS2</i> | miR-1587/3620-5p                     | 1 |
| <i>circREPS2</i> | miR-15a-3p                           | 1 |
| <i>circREPS2</i> | miR-16-1-3p                          | 2 |
| <i>circREPS2</i> | miR-17-5p/20-5p/93-5p/106-5p/519-3p  | 5 |
| <i>circREPS2</i> | miR-181-3p/4420                      | 2 |
| <i>circREPS2</i> | miR-183-3p                           | 4 |
| <i>circREPS2</i> | miR-185-5p                           | 2 |
| <i>circREPS2</i> | miR-186-5p                           | 8 |
| <i>circREPS2</i> | miR-187-5p                           | 1 |
| <i>circREPS2</i> | miR-188-3p                           | 2 |
| <i>circREPS2</i> | miR-1909-3p/6722-3p                  | 1 |
| <i>circREPS2</i> | miR-1909-5p                          | 1 |
| <i>circREPS2</i> | miR-190a-3p                          | 2 |
| <i>circREPS2</i> | miR-1910-5p                          | 1 |
| <i>circREPS2</i> | miR-1911-3p                          | 1 |
| <i>circREPS2</i> | miR-1914-5p                          | 1 |
| <i>circREPS2</i> | miR-1915-3p/6764-5p                  | 1 |
| <i>circREPS2</i> | miR-192-3p                           | 1 |
| <i>circREPS2</i> | miR-192-5p/215-5p                    | 1 |
| <i>circREPS2</i> | miR-193a-5p                          | 1 |
| <i>circREPS2</i> | miR-194-3p                           | 2 |
| <i>circREPS2</i> | miR-194-5p                           | 1 |
| <i>circREPS2</i> | miR-196a-3p                          | 1 |
| <i>circREPS2</i> | miR-196b-3p                          | 1 |
| <i>circREPS2</i> | miR-197-5p/3132                      | 1 |
| <i>circREPS2</i> | miR-1972                             | 1 |
| <i>circREPS2</i> | miR-198                              | 2 |
| <i>circREPS2</i> | miR-202-5p                           | 1 |
| <i>circREPS2</i> | miR-203a-3p.1                        | 4 |

|                  |                                     |   |
|------------------|-------------------------------------|---|
| <i>circREPS2</i> | miR-203a-5p                         | 2 |
| <i>circREPS2</i> | miR-203b-3p                         | 3 |
| <i>circREPS2</i> | miR-203b-5p/6718-5p                 | 1 |
| <i>circREPS2</i> | miR-204-3p/4646-5p                  | 3 |
| <i>circREPS2</i> | miR-2053                            | 2 |
| <i>circREPS2</i> | miR-2054                            | 1 |
| <i>circREPS2</i> | miR-208-3p                          | 1 |
| <i>circREPS2</i> | miR-20a-3p                          | 1 |
| <i>circREPS2</i> | miR-21-3p/3591-3p                   | 2 |
| <i>circREPS2</i> | miR-2110                            | 1 |
| <i>circREPS2</i> | miR-2113                            | 3 |
| <i>circREPS2</i> | miR-2114-5p                         | 1 |
| <i>circREPS2</i> | miR-2116-3p                         | 1 |
| <i>circREPS2</i> | miR-2116-5p                         | 2 |
| <i>circREPS2</i> | miR-2117                            | 2 |
| <i>circREPS2</i> | miR-214-3p/3619-5p                  | 2 |
| <i>circREPS2</i> | miR-214-5p                          | 2 |
| <i>circREPS2</i> | miR-216a-5p                         | 1 |
| <i>circREPS2</i> | miR-216b-3p                         | 2 |
| <i>circREPS2</i> | miR-216b-5p                         | 1 |
| <i>circREPS2</i> | miR-217                             | 1 |
| <i>circREPS2</i> | miR-219a-1-3p                       | 1 |
| <i>circREPS2</i> | miR-219a-2-3p                       | 1 |
| <i>circREPS2</i> | miR-219b-3p                         | 1 |
| <i>circREPS2</i> | miR-22-3p                           | 2 |
| <i>circREPS2</i> | miR-22-5p                           | 2 |
| <i>circREPS2</i> | miR-221-5p/8073                     | 1 |
| <i>circREPS2</i> | miR-223-5p                          | 1 |
| <i>circREPS2</i> | miR-2276-3p                         | 1 |
| <i>circREPS2</i> | miR-2277-3p                         | 1 |
| <i>circREPS2</i> | miR-2278                            | 4 |
| <i>circREPS2</i> | miR-2355-3p                         | 2 |
| <i>circREPS2</i> | miR-2467-5p                         | 2 |
| <i>circREPS2</i> | miR-25-3p/32-5p/92-3p/363-3p/367-3p | 1 |
| <i>circREPS2</i> | miR-26-5p                           | 1 |
| <i>circREPS2</i> | miR-2681-3p                         | 1 |
| <i>circREPS2</i> | miR-2681-5p                         | 1 |
| <i>circREPS2</i> | miR-2682-3p/6781-3p                 | 2 |



|                  |                      |   |
|------------------|----------------------|---|
| <i>circREPS2</i> | miR-27-3p            | 2 |
| <i>circREPS2</i> | miR-28-3p            | 1 |
| <i>circREPS2</i> | miR-28-5p/708-5p     | 2 |
| <i>circREPS2</i> | miR-2861             | 1 |
| <i>circREPS2</i> | miR-297              | 3 |
| <i>circREPS2</i> | miR-298              | 3 |
| <i>circREPS2</i> | miR-299-3p           | 1 |
| <i>circREPS2</i> | miR-29b-2-5p         | 3 |
| <i>circREPS2</i> | miR-301a-5p/301b-5p  | 1 |
| <i>circREPS2</i> | miR-302c-3p.2/520-3p | 1 |
| <i>circREPS2</i> | miR-302c-5p          | 3 |
| <i>circREPS2</i> | miR-302f             | 1 |
| <i>circREPS2</i> | miR-3064-3p          | 4 |
| <i>circREPS2</i> | miR-3065-3p          | 3 |
| <i>circREPS2</i> | miR-3065-5p          | 2 |
| <i>circREPS2</i> | miR-31-3p            | 1 |
| <i>circREPS2</i> | miR-3117-5p          | 1 |
| <i>circREPS2</i> | miR-3119             | 1 |
| <i>circREPS2</i> | miR-3120-3p          | 1 |
| <i>circREPS2</i> | miR-3120-5p          | 1 |
| <i>circREPS2</i> | miR-3121-3p          | 1 |
| <i>circREPS2</i> | miR-3122/3913-5p     | 2 |
| <i>circREPS2</i> | miR-3123             | 5 |
| <i>circREPS2</i> | miR-3126-5p          | 1 |
| <i>circREPS2</i> | miR-3129-3p/5583-5p  | 2 |
| <i>circREPS2</i> | miR-3130-3p          | 1 |
| <i>circREPS2</i> | miR-3133             | 8 |
| <i>circREPS2</i> | miR-3134             | 1 |
| <i>circREPS2</i> | miR-3136-3p/7155-3p  | 1 |
| <i>circREPS2</i> | miR-3136-5p/4439     | 1 |
| <i>circREPS2</i> | miR-3140-3p          | 2 |
| <i>circREPS2</i> | miR-3140-5p          | 2 |
| <i>circREPS2</i> | miR-3143             | 1 |
| <i>circREPS2</i> | miR-3145-5p          | 2 |
| <i>circREPS2</i> | miR-3146             | 4 |
| <i>circREPS2</i> | miR-3147             | 1 |
| <i>circREPS2</i> | miR-3148             | 3 |
| <i>circREPS2</i> | miR-3149             | 1 |

|                  |                          |    |
|------------------|--------------------------|----|
| <i>circREPS2</i> | miR-3150a-3p             | 1  |
| <i>circREPS2</i> | miR-3151-5p              | 1  |
| <i>circREPS2</i> | miR-3152-3p              | 1  |
| <i>circREPS2</i> | miR-3152-5p              | 2  |
| <i>circREPS2</i> | miR-3153/6733-5p/6739-5p | 1  |
| <i>circREPS2</i> | miR-3156-3p              | 2  |
| <i>circREPS2</i> | miR-3156-5p              | 1  |
| <i>circREPS2</i> | miR-3157-3p              | 3  |
| <i>circREPS2</i> | miR-3157-5p              | 3  |
| <i>circREPS2</i> | miR-3158-3p              | 3  |
| <i>circREPS2</i> | miR-3160-3p              | 2  |
| <i>circREPS2</i> | miR-3161                 | 2  |
| <i>circREPS2</i> | miR-3162-5p              | 1  |
| <i>circREPS2</i> | miR-3163                 | 11 |
| <i>circREPS2</i> | miR-3168                 | 3  |
| <i>circREPS2</i> | miR-3169                 | 1  |
| <i>circREPS2</i> | miR-3170/6855-5p         | 1  |
| <i>circREPS2</i> | miR-3174                 | 1  |
| <i>circREPS2</i> | miR-3176/3922-3p         | 2  |
| <i>circREPS2</i> | miR-3180-5p              | 3  |
| <i>circREPS2</i> | miR-3182                 | 3  |
| <i>circREPS2</i> | miR-3184-3p              | 1  |
| <i>circREPS2</i> | miR-3187-3p              | 2  |
| <i>circREPS2</i> | miR-3188                 | 2  |
| <i>circREPS2</i> | miR-3190-3p              | 1  |
| <i>circREPS2</i> | miR-3190-5p              | 2  |
| <i>circREPS2</i> | miR-3191-5p              | 1  |
| <i>circREPS2</i> | miR-3192-3p              | 2  |
| <i>circREPS2</i> | miR-3192-5p              | 3  |
| <i>circREPS2</i> | miR-3194-3p              | 1  |
| <i>circREPS2</i> | miR-3194-5p              | 2  |
| <i>circREPS2</i> | miR-3198/4309            | 1  |
| <i>circREPS2</i> | miR-3199/8052            | 1  |
| <i>circREPS2</i> | miR-32-3p                | 2  |
| <i>circREPS2</i> | miR-320                  | 3  |
| <i>circREPS2</i> | miR-3200-3p              | 1  |
| <i>circREPS2</i> | miR-3201/4791            | 1  |
| <i>circREPS2</i> | miR-3202                 | 2  |

|                  |                       |   |
|------------------|-----------------------|---|
| <i>circREPS2</i> | miR-323-3p            | 3 |
| <i>circREPS2</i> | miR-323a-5p           | 1 |
| <i>circREPS2</i> | miR-323b-3p           | 2 |
| <i>circREPS2</i> | miR-324-5p            | 1 |
| <i>circREPS2</i> | miR-328-3p            | 1 |
| <i>circREPS2</i> | miR-329-5p            | 1 |
| <i>circREPS2</i> | miR-330-3p            | 2 |
| <i>circREPS2</i> | miR-330-3p.2          | 3 |
| <i>circREPS2</i> | miR-331-5p            | 1 |
| <i>circREPS2</i> | miR-335-3p            | 3 |
| <i>circREPS2</i> | miR-335-5p            | 1 |
| <i>circREPS2</i> | miR-338-3p            | 5 |
| <i>circREPS2</i> | miR-338-5p            | 1 |
| <i>circREPS2</i> | miR-339-3p            | 1 |
| <i>circREPS2</i> | miR-339-5p            | 1 |
| <i>circREPS2</i> | miR-340-5p            | 3 |
| <i>circREPS2</i> | miR-342-3p            | 1 |
| <i>circREPS2</i> | miR-345-3p            | 2 |
| <i>circREPS2</i> | miR-345-5p            | 1 |
| <i>circREPS2</i> | miR-34b-3p            | 3 |
| <i>circREPS2</i> | miR-34c-3p            | 3 |
| <i>circREPS2</i> | miR-3529-3p           | 4 |
| <i>circREPS2</i> | miR-3591-5p           | 1 |
| <i>circREPS2</i> | miR-3606-5p           | 1 |
| <i>circREPS2</i> | miR-3611              | 6 |
| <i>circREPS2</i> | miR-3613-3p           | 4 |
| <i>circREPS2</i> | miR-3613-5p           | 1 |
| <i>circREPS2</i> | miR-3614-5p           | 6 |
| <i>circREPS2</i> | miR-3616-3p           | 2 |
| <i>circREPS2</i> | miR-362-5p/500b-5p    | 1 |
| <i>circREPS2</i> | miR-3620-3p           | 1 |
| <i>circREPS2</i> | miR-3622a-3p/3622b-3p | 1 |
| <i>circREPS2</i> | miR-3622a-5p          | 1 |
| <i>circREPS2</i> | miR-3622b-5p          | 2 |
| <i>circREPS2</i> | miR-3649              | 1 |
| <i>circREPS2</i> | miR-365-3p            | 2 |
| <i>circREPS2</i> | miR-3650              | 1 |
| <i>circREPS2</i> | miR-3653-3p           | 2 |

|                  |                           |   |
|------------------|---------------------------|---|
| <i>circREPS2</i> | miR-3654                  | 1 |
| <i>circREPS2</i> | miR-3657                  | 1 |
| <i>circREPS2</i> | miR-3658                  | 1 |
| <i>circREPS2</i> | miR-365a-5p/365b-5p       | 1 |
| <i>circREPS2</i> | miR-3660/4526             | 2 |
| <i>circREPS2</i> | miR-3662                  | 7 |
| <i>circREPS2</i> | miR-3663-5p               | 1 |
| <i>circREPS2</i> | miR-3664-3p               | 2 |
| <i>circREPS2</i> | miR-3664-5p               | 2 |
| <i>circREPS2</i> | miR-3665                  | 3 |
| <i>circREPS2</i> | miR-3667-3p               | 1 |
| <i>circREPS2</i> | miR-3667-5p               | 3 |
| <i>circREPS2</i> | miR-367-5p                | 1 |
| <i>circREPS2</i> | miR-3670                  | 2 |
| <i>circREPS2</i> | miR-3672/6864-3p          | 3 |
| <i>circREPS2</i> | miR-3675-3p               | 1 |
| <i>circREPS2</i> | miR-3675-5p               | 3 |
| <i>circREPS2</i> | miR-3677-5p               | 2 |
| <i>circREPS2</i> | miR-3678-3p               | 1 |
| <i>circREPS2</i> | miR-3680-5p               | 1 |
| <i>circREPS2</i> | miR-3681-5p               | 2 |
| <i>circREPS2</i> | miR-3682-3p               | 3 |
| <i>circREPS2</i> | miR-3682-5p               | 1 |
| <i>circREPS2</i> | miR-3685                  | 1 |
| <i>circREPS2</i> | miR-3688-5p               | 1 |
| <i>circREPS2</i> | miR-369-3p                | 2 |
| <i>circREPS2</i> | miR-3691-5p               | 1 |
| <i>circREPS2</i> | miR-3692-3p               | 1 |
| <i>circREPS2</i> | miR-371-5p                | 2 |
| <i>circREPS2</i> | miR-3713                  | 2 |
| <i>circREPS2</i> | miR-371b-5p/373-5p/616-5p | 2 |
| <i>circREPS2</i> | miR-372-5p                | 2 |
| <i>circREPS2</i> | miR-374-5p                | 2 |
| <i>circREPS2</i> | miR-374b-3p               | 2 |
| <i>circREPS2</i> | miR-374c-3p               | 1 |
| <i>circREPS2</i> | miR-376a-2-5p             | 1 |
| <i>circREPS2</i> | miR-376a-5p               | 1 |
| <i>circREPS2</i> | miR-376b-5p/376c-5p       | 2 |

|                  |                     |   |
|------------------|---------------------|---|
| <i>circREPS2</i> | miR-376c-3p         | 1 |
| <i>circREPS2</i> | miR-377-3p          | 2 |
| <i>circREPS2</i> | miR-377-5p/6086     | 1 |
| <i>circREPS2</i> | miR-378a-5p         | 1 |
| <i>circREPS2</i> | miR-379-5p          | 1 |
| <i>circREPS2</i> | miR-380-5p/563      | 1 |
| <i>circREPS2</i> | miR-381-3p          | 2 |
| <i>circREPS2</i> | miR-382-5p          | 2 |
| <i>circREPS2</i> | miR-383-3p          | 3 |
| <i>circREPS2</i> | miR-383-5p.2        | 1 |
| <i>circREPS2</i> | miR-384             | 1 |
| <i>circREPS2</i> | miR-3909            | 1 |
| <i>circREPS2</i> | miR-3911            | 1 |
| <i>circREPS2</i> | miR-3912-5p         | 5 |
| <i>circREPS2</i> | miR-3919            | 3 |
| <i>circREPS2</i> | miR-3920            | 2 |
| <i>circREPS2</i> | miR-3921/4653-5p    | 1 |
| <i>circREPS2</i> | miR-3922-5p         | 1 |
| <i>circREPS2</i> | miR-3924            | 1 |
| <i>circREPS2</i> | miR-3925-5p         | 5 |
| <i>circREPS2</i> | miR-3926            | 1 |
| <i>circREPS2</i> | miR-3929/4419b/4478 | 1 |
| <i>circREPS2</i> | miR-3934-5p         | 3 |
| <i>circREPS2</i> | miR-3937            | 1 |
| <i>circREPS2</i> | miR-3938            | 1 |
| <i>circREPS2</i> | miR-3941            | 2 |
| <i>circREPS2</i> | miR-3942-3p         | 3 |
| <i>circREPS2</i> | miR-3944-5p         | 3 |
| <i>circREPS2</i> | miR-3973            | 2 |
| <i>circREPS2</i> | miR-3974            | 1 |
| <i>circREPS2</i> | miR-3975            | 2 |
| <i>circREPS2</i> | miR-410-3p          | 2 |
| <i>circREPS2</i> | miR-411-3p          | 1 |
| <i>circREPS2</i> | miR-412-3p/6754-3p  | 3 |
| <i>circREPS2</i> | miR-421             | 1 |
| <i>circREPS2</i> | miR-4251            | 2 |
| <i>circREPS2</i> | miR-4252            | 3 |
| <i>circREPS2</i> | miR-4255            | 1 |

|                  |                                    |   |
|------------------|------------------------------------|---|
| <i>circREPS2</i> | miR-4264                           | 1 |
| <i>circREPS2</i> | miR-4265/4296/4322                 | 2 |
| <i>circREPS2</i> | miR-4267                           | 2 |
| <i>circREPS2</i> | miR-4269/6715b-5p                  | 1 |
| <i>circREPS2</i> | miR-4270/4441/6754-5p              | 2 |
| <i>circREPS2</i> | miR-4274                           | 3 |
| <i>circREPS2</i> | miR-4276                           | 2 |
| <i>circREPS2</i> | miR-4279                           | 1 |
| <i>circREPS2</i> | miR-4282                           | 4 |
| <i>circREPS2</i> | miR-4287/4685-3p                   | 2 |
| <i>circREPS2</i> | miR-4289                           | 1 |
| <i>circREPS2</i> | miR-4290                           | 1 |
| <i>circREPS2</i> | miR-4292/6791-5p                   | 1 |
| <i>circREPS2</i> | miR-4297/5581-5p                   | 2 |
| <i>circREPS2</i> | miR-4301                           | 1 |
| <i>circREPS2</i> | miR-4303                           | 1 |
| <i>circREPS2</i> | miR-4308                           | 1 |
| <i>circREPS2</i> | miR-431-5p                         | 2 |
| <i>circREPS2</i> | miR-4310/7157-5p                   | 3 |
| <i>circREPS2</i> | miR-4311                           | 4 |
| <i>circREPS2</i> | miR-432-5p                         | 2 |
| <i>circREPS2</i> | miR-4320                           | 1 |
| <i>circREPS2</i> | miR-4325                           | 1 |
| <i>circREPS2</i> | miR-4329                           | 2 |
| <i>circREPS2</i> | miR-433-3p                         | 2 |
| <i>circREPS2</i> | miR-4417                           | 1 |
| <i>circREPS2</i> | miR-4419a/4510/6127/6129/6130/6133 | 1 |
| <i>circREPS2</i> | miR-4421/5699-3p                   | 1 |
| <i>circREPS2</i> | miR-4422                           | 3 |
| <i>circREPS2</i> | miR-4423-3p                        | 3 |
| <i>circREPS2</i> | miR-4423-5p                        | 3 |
| <i>circREPS2</i> | miR-4424                           | 1 |
| <i>circREPS2</i> | miR-4425                           | 1 |
| <i>circREPS2</i> | miR-4426/4647/4662b                | 2 |
| <i>circREPS2</i> | miR-4427                           | 2 |
| <i>circREPS2</i> | miR-4432                           | 3 |
| <i>circREPS2</i> | miR-4433a-3p                       | 3 |
| <i>circREPS2</i> | miR-4433b-3p                       | 1 |

|                  |                    |   |
|------------------|--------------------|---|
| <i>circREPS2</i> | miR-4433b-5p       | 2 |
| <i>circREPS2</i> | miR-4434/4516/5703 | 1 |
| <i>circREPS2</i> | miR-4435           | 2 |
| <i>circREPS2</i> | miR-4436b-5p       | 1 |
| <i>circREPS2</i> | miR-4437           | 3 |
| <i>circREPS2</i> | miR-4438           | 2 |
| <i>circREPS2</i> | miR-4443           | 1 |
| <i>circREPS2</i> | miR-4446-3p        | 3 |
| <i>circREPS2</i> | miR-4447/4472      | 1 |
| <i>circREPS2</i> | miR-4451           | 1 |
| <i>circREPS2</i> | miR-4452           | 4 |
| <i>circREPS2</i> | miR-4453/4538      | 1 |
| <i>circREPS2</i> | miR-4455           | 1 |
| <i>circREPS2</i> | miR-4457           | 1 |
| <i>circREPS2</i> | miR-4459           | 3 |
| <i>circREPS2</i> | miR-4460           | 1 |
| <i>circREPS2</i> | miR-4461           | 1 |
| <i>circREPS2</i> | miR-4464/4748      | 1 |
| <i>circREPS2</i> | miR-4468           | 1 |
| <i>circREPS2</i> | miR-4469           | 2 |
| <i>circREPS2</i> | miR-4470           | 2 |
| <i>circREPS2</i> | miR-4471/8059      | 1 |
| <i>circREPS2</i> | miR-4474-3p        | 1 |
| <i>circREPS2</i> | miR-4476/6876-5p   | 1 |
| <i>circREPS2</i> | miR-4477a          | 2 |
| <i>circREPS2</i> | miR-448            | 1 |
| <i>circREPS2</i> | miR-4487           | 2 |
| <i>circREPS2</i> | miR-4491/4657      | 1 |
| <i>circREPS2</i> | miR-4493           | 1 |
| <i>circREPS2</i> | miR-4494           | 3 |
| <i>circREPS2</i> | miR-4496           | 3 |
| <i>circREPS2</i> | miR-450-5p         | 2 |
| <i>circREPS2</i> | miR-4501           | 3 |
| <i>circREPS2</i> | miR-4503           | 1 |
| <i>circREPS2</i> | miR-4506           | 5 |
| <i>circREPS2</i> | miR-450a-1-3p      | 2 |
| <i>circREPS2</i> | miR-450b-3p/769-3p | 3 |
| <i>circREPS2</i> | miR-451            | 1 |

|                  |                       |   |
|------------------|-----------------------|---|
| <i>circREPS2</i> | miR-4511              | 2 |
| <i>circREPS2</i> | miR-4513/6855-3p      | 2 |
| <i>circREPS2</i> | miR-4514/4692         | 1 |
| <i>circREPS2</i> | miR-4515              | 3 |
| <i>circREPS2</i> | miR-4519              | 3 |
| <i>circREPS2</i> | miR-451b              | 1 |
| <i>circREPS2</i> | miR-452-3p            | 1 |
| <i>circREPS2</i> | miR-4520-5p           | 2 |
| <i>circREPS2</i> | miR-4524-5p           | 2 |
| <i>circREPS2</i> | miR-4524a-3p          | 1 |
| <i>circREPS2</i> | miR-4524b-3p          | 3 |
| <i>circREPS2</i> | miR-4527/6503-5p      | 2 |
| <i>circREPS2</i> | miR-4528              | 2 |
| <i>circREPS2</i> | miR-4529-5p           | 1 |
| <i>circREPS2</i> | miR-4530              | 5 |
| <i>circREPS2</i> | miR-4531              | 3 |
| <i>circREPS2</i> | miR-4533              | 2 |
| <i>circREPS2</i> | miR-4534/8082         | 1 |
| <i>circREPS2</i> | miR-4536-5p           | 1 |
| <i>circREPS2</i> | miR-455-3p.1          | 1 |
| <i>circREPS2</i> | miR-455-3p.2          | 3 |
| <i>circREPS2</i> | miR-455-5p            | 3 |
| <i>circREPS2</i> | miR-4633-3p/6500-5p   | 3 |
| <i>circREPS2</i> | miR-4635              | 3 |
| <i>circREPS2</i> | miR-4636              | 1 |
| <i>circREPS2</i> | miR-4637              | 1 |
| <i>circREPS2</i> | miR-4638-5p           | 1 |
| <i>circREPS2</i> | miR-4639-3p           | 1 |
| <i>circREPS2</i> | miR-4639-5p           | 3 |
| <i>circREPS2</i> | miR-4641              | 1 |
| <i>circREPS2</i> | miR-4642              | 1 |
| <i>circREPS2</i> | miR-4645-5p/4673      | 1 |
| <i>circREPS2</i> | miR-4646-3p           | 2 |
| <i>circREPS2</i> | miR-4649-3p           | 3 |
| <i>circREPS2</i> | miR-4650-3p           | 1 |
| <i>circREPS2</i> | miR-4650-5p           | 1 |
| <i>circREPS2</i> | miR-4653-3p           | 2 |
| <i>circREPS2</i> | miR-4659a-3p/4659b-3p | 5 |



|                  |                          |   |
|------------------|--------------------------|---|
| <i>circREPS2</i> | miR-4659a-5p/4659b-5p    | 1 |
| <i>circREPS2</i> | miR-466                  | 4 |
| <i>circREPS2</i> | miR-4662a-3p             | 4 |
| <i>circREPS2</i> | miR-4663                 | 4 |
| <i>circREPS2</i> | miR-4665-3p              | 1 |
| <i>circREPS2</i> | miR-4666a-3p             | 2 |
| <i>circREPS2</i> | miR-4666b                | 3 |
| <i>circREPS2</i> | miR-4667-3p              | 2 |
| <i>circREPS2</i> | miR-4667-5p/4700-5p/8089 | 1 |
| <i>circREPS2</i> | miR-4668-3p              | 3 |
| <i>circREPS2</i> | miR-4668-5p              | 1 |
| <i>circREPS2</i> | miR-4669                 | 1 |
| <i>circREPS2</i> | miR-4670-3p              | 2 |
| <i>circREPS2</i> | miR-4672                 | 2 |
| <i>circREPS2</i> | miR-4674                 | 1 |
| <i>circREPS2</i> | miR-4677-3p              | 4 |
| <i>circREPS2</i> | miR-4679                 | 4 |
| <i>circREPS2</i> | miR-4680-3p              | 2 |
| <i>circREPS2</i> | miR-4680-5p              | 2 |
| <i>circREPS2</i> | miR-4681                 | 1 |
| <i>circREPS2</i> | miR-4683                 | 4 |
| <i>circREPS2</i> | miR-4684-3p              | 1 |
| <i>circREPS2</i> | miR-4685-5p/6837-5p      | 2 |
| <i>circREPS2</i> | miR-4686                 | 1 |
| <i>circREPS2</i> | miR-4690-3p/5685         | 1 |
| <i>circREPS2</i> | miR-4690-5p              | 2 |
| <i>circREPS2</i> | miR-4691-3p              | 3 |
| <i>circREPS2</i> | miR-4694-3p              | 4 |
| <i>circREPS2</i> | miR-4694-5p              | 1 |
| <i>circREPS2</i> | miR-4695-3p              | 1 |
| <i>circREPS2</i> | miR-4696                 | 2 |
| <i>circREPS2</i> | miR-4699-3p              | 2 |
| <i>circREPS2</i> | miR-4699-5p              | 3 |
| <i>circREPS2</i> | miR-4700-3p              | 1 |
| <i>circREPS2</i> | miR-4704-3p              | 2 |
| <i>circREPS2</i> | miR-4709-5p              | 1 |
| <i>circREPS2</i> | miR-4711-3p              | 2 |
| <i>circREPS2</i> | miR-4711-5p              | 1 |

|                  |                                  |   |
|------------------|----------------------------------|---|
| <i>circREPS2</i> | miR-4712-3p                      | 3 |
| <i>circREPS2</i> | miR-4713-5p                      | 1 |
| <i>circREPS2</i> | miR-4714-3p                      | 1 |
| <i>circREPS2</i> | miR-4714-5p                      | 2 |
| <i>circREPS2</i> | miR-4715-3p                      | 1 |
| <i>circREPS2</i> | miR-4716-3p/6794-5p              | 2 |
| <i>circREPS2</i> | miR-4716-5p                      | 1 |
| <i>circREPS2</i> | miR-4717-3p                      | 2 |
| <i>circREPS2</i> | miR-4719                         | 5 |
| <i>circREPS2</i> | miR-4720-3p                      | 1 |
| <i>circREPS2</i> | miR-4721                         | 2 |
| <i>circREPS2</i> | miR-4722-5p                      | 1 |
| <i>circREPS2</i> | miR-4723-5p/5698/6870-5p/7111-5p | 2 |
| <i>circREPS2</i> | miR-4724-3p                      | 1 |
| <i>circREPS2</i> | miR-4724-5p                      | 3 |
| <i>circREPS2</i> | miR-4725-5p                      | 1 |
| <i>circREPS2</i> | miR-4726-3p                      | 1 |
| <i>circREPS2</i> | miR-4727-3p                      | 1 |
| <i>circREPS2</i> | miR-4731-3p/4801                 | 2 |
| <i>circREPS2</i> | miR-4733-3p                      | 2 |
| <i>circREPS2</i> | miR-4733-5p                      | 2 |
| <i>circREPS2</i> | miR-4736                         | 1 |
| <i>circREPS2</i> | miR-4738-3p                      | 1 |
| <i>circREPS2</i> | miR-4739                         | 2 |
| <i>circREPS2</i> | miR-4740-5p                      | 3 |
| <i>circREPS2</i> | miR-4742-3p                      | 2 |
| <i>circREPS2</i> | miR-4742-5p                      | 1 |
| <i>circREPS2</i> | miR-4753-3p                      | 1 |
| <i>circREPS2</i> | miR-4754                         | 2 |
| <i>circREPS2</i> | miR-4755-3p                      | 3 |
| <i>circREPS2</i> | miR-4756-3p                      | 3 |
| <i>circREPS2</i> | miR-4757-5p/6744-3p              | 1 |
| <i>circREPS2</i> | miR-4759                         | 1 |
| <i>circREPS2</i> | miR-4760-5p/8061                 | 2 |
| <i>circREPS2</i> | miR-4761-5p                      | 2 |
| <i>circREPS2</i> | miR-4762-3p                      | 1 |
| <i>circREPS2</i> | miR-4764-3p                      | 2 |
| <i>circREPS2</i> | miR-4765                         | 3 |

|                  |                     |   |
|------------------|---------------------|---|
| <i>circREPS2</i> | miR-4766-3p         | 2 |
| <i>circREPS2</i> | miR-4766-5p         | 2 |
| <i>circREPS2</i> | miR-4768-3p         | 3 |
| <i>circREPS2</i> | miR-4772-3p         | 1 |
| <i>circREPS2</i> | miR-4773            | 3 |
| <i>circREPS2</i> | miR-4774-3p         | 2 |
| <i>circREPS2</i> | miR-4776-3p         | 4 |
| <i>circREPS2</i> | miR-4777-3p         | 1 |
| <i>circREPS2</i> | miR-4777-5p         | 1 |
| <i>circREPS2</i> | miR-4778-3p         | 3 |
| <i>circREPS2</i> | miR-4780            | 1 |
| <i>circREPS2</i> | miR-4786-5p         | 2 |
| <i>circREPS2</i> | miR-4788            | 1 |
| <i>circREPS2</i> | miR-4790-3p         | 8 |
| <i>circREPS2</i> | miR-4793-3p         | 1 |
| <i>circREPS2</i> | miR-4793-5p         | 2 |
| <i>circREPS2</i> | miR-4795-3p         | 4 |
| <i>circREPS2</i> | miR-4796-3p         | 2 |
| <i>circREPS2</i> | miR-4796-5p         | 1 |
| <i>circREPS2</i> | miR-4797-3p         | 1 |
| <i>circREPS2</i> | miR-4797-5p         | 3 |
| <i>circREPS2</i> | miR-4798-3p         | 1 |
| <i>circREPS2</i> | miR-4799-5p         | 1 |
| <i>circREPS2</i> | miR-4802-3p         | 1 |
| <i>circREPS2</i> | miR-4802-5p         | 2 |
| <i>circREPS2</i> | miR-4803            | 3 |
| <i>circREPS2</i> | miR-4804-3p         | 1 |
| <i>circREPS2</i> | miR-483-3p.1        | 1 |
| <i>circREPS2</i> | miR-483-3p.2        | 1 |
| <i>circREPS2</i> | miR-484/3155        | 2 |
| <i>circREPS2</i> | miR-485-5p          | 2 |
| <i>circREPS2</i> | miR-486-5p          | 2 |
| <i>circREPS2</i> | miR-487a-5p/487b-5p | 2 |
| <i>circREPS2</i> | miR-488-3p          | 2 |
| <i>circREPS2</i> | miR-490-3p          | 1 |
| <i>circREPS2</i> | miR-490-5p          | 3 |
| <i>circREPS2</i> | miR-491-3p          | 2 |
| <i>circREPS2</i> | miR-491-5p          | 1 |

|                  |                             |   |
|------------------|-----------------------------|---|
| <i>circREPS2</i> | miR-492                     | 1 |
| <i>circREPS2</i> | miR-493-5p                  | 3 |
| <i>circREPS2</i> | miR-494-3p                  | 2 |
| <i>circREPS2</i> | miR-495-5p                  | 2 |
| <i>circREPS2</i> | miR-496.2                   | 1 |
| <i>circREPS2</i> | miR-497-3p                  | 1 |
| <i>circREPS2</i> | miR-4999-3p                 | 1 |
| <i>circREPS2</i> | miR-499a-5p                 | 1 |
| <i>circREPS2</i> | miR-499b-5p                 | 3 |
| <i>circREPS2</i> | miR-5000-5p                 | 1 |
| <i>circREPS2</i> | miR-5002-3p                 | 2 |
| <i>circREPS2</i> | miR-5002-5p                 | 1 |
| <i>circREPS2</i> | miR-5003-3p                 | 1 |
| <i>circREPS2</i> | miR-5004-3p                 | 2 |
| <i>circREPS2</i> | miR-5006-5p                 | 2 |
| <i>circREPS2</i> | miR-5007-3p                 | 2 |
| <i>circREPS2</i> | miR-5008-3p/6737-3p/7157-3p | 1 |
| <i>circREPS2</i> | miR-5009-5p/8058            | 4 |
| <i>circREPS2</i> | miR-501-5p                  | 1 |
| <i>circREPS2</i> | miR-5010-3p                 | 3 |
| <i>circREPS2</i> | miR-5010-5p                 | 2 |
| <i>circREPS2</i> | miR-5011-3p                 | 3 |
| <i>circREPS2</i> | miR-5011-5p                 | 5 |
| <i>circREPS2</i> | miR-503-5p                  | 1 |
| <i>circREPS2</i> | miR-505-3p.2                | 1 |
| <i>circREPS2</i> | miR-506-5p                  | 2 |
| <i>circREPS2</i> | miR-508-5p                  | 2 |
| <i>circREPS2</i> | miR-5088-5p                 | 3 |
| <i>circREPS2</i> | miR-5089-5p                 | 3 |
| <i>circREPS2</i> | miR-509-3-5p/509-5p/4418    | 1 |
| <i>circREPS2</i> | miR-5091                    | 1 |
| <i>circREPS2</i> | miR-5094                    | 1 |
| <i>circREPS2</i> | miR-5096                    | 1 |
| <i>circREPS2</i> | miR-510-3p                  | 2 |
| <i>circREPS2</i> | miR-5100                    | 1 |
| <i>circREPS2</i> | miR-511-3p                  | 1 |
| <i>circREPS2</i> | miR-511-5p                  | 1 |
| <i>circREPS2</i> | miR-512-3p                  | 1 |

|                  |                                         |   |
|------------------|-----------------------------------------|---|
| <i>circREPS2</i> | miR-512-5p                              | 1 |
| <i>circREPS2</i> | miR-513a-3p/513c-3p/3606-3p             | 2 |
| <i>circREPS2</i> | miR-513a-5p                             | 2 |
| <i>circREPS2</i> | miR-513b-3p                             | 2 |
| <i>circREPS2</i> | miR-513b-5p                             | 3 |
| <i>circREPS2</i> | miR-513c-5p/514b-5p                     | 1 |
| <i>circREPS2</i> | miR-514a-5p                             | 2 |
| <i>circREPS2</i> | miR-515-5p/519e-5p                      | 2 |
| <i>circREPS2</i> | miR-5187-3p                             | 2 |
| <i>circREPS2</i> | miR-5187-5p                             | 3 |
| <i>circREPS2</i> | miR-5189-3p                             | 1 |
| <i>circREPS2</i> | miR-518a-5p/527                         | 2 |
| <i>circREPS2</i> | miR-518d-5p/519-5p                      | 1 |
| <i>circREPS2</i> | miR-5190                                | 2 |
| <i>circREPS2</i> | miR-5191                                | 3 |
| <i>circREPS2</i> | miR-5192                                | 2 |
| <i>circREPS2</i> | miR-5196-3p                             | 2 |
| <i>circREPS2</i> | miR-5197-3p                             | 3 |
| <i>circREPS2</i> | miR-5197-5p                             | 3 |
| <i>circREPS2</i> | miR-519d-5p                             | 3 |
| <i>circREPS2</i> | miR-520f-5p                             | 1 |
| <i>circREPS2</i> | miR-520g-3p                             | 2 |
| <i>circREPS2</i> | miR-522-3p                              | 4 |
| <i>circREPS2</i> | miR-524-5p                              | 2 |
| <i>circREPS2</i> | miR-525-5p                              | 2 |
| <i>circREPS2</i> | miR-526b-5p                             | 3 |
| <i>circREPS2</i> | miR-532-3p                              | 1 |
| <i>circREPS2</i> | miR-532-5p                              | 2 |
| <i>circREPS2</i> | miR-539-3p                              | 1 |
| <i>circREPS2</i> | miR-539-5p                              | 5 |
| <i>circREPS2</i> | miR-541-5p                              | 2 |
| <i>circREPS2</i> | miR-543                                 | 2 |
| <i>circREPS2</i> | miR-545-3p                              | 1 |
| <i>circREPS2</i> | miR-548ac/548bb-3p/548d-3p/548h-3p/548z | 1 |
| <i>circREPS2</i> | miR-548ah-5p/3609                       | 5 |
| <i>circREPS2</i> | miR-548aj-5p/548f-5p/548g-5p/548x-5p    | 3 |
| <i>circREPS2</i> | miR-548ao-3p                            | 3 |
| <i>circREPS2</i> | miR-548ao-5p/548ax                      | 1 |

|                  |                                                                  |   |
|------------------|------------------------------------------------------------------|---|
| <i>circREPS2</i> | miR-548ap-3p/548aa/548t-3p                                       | 2 |
| <i>circREPS2</i> | miR-548aq-3p/548am-3p/548aj-3p/548ah33p/548ae-3p/548j-3p/548x-3p | 2 |
| <i>circREPS2</i> | miR-548as-3p                                                     | 2 |
| <i>circREPS2</i> | miR-548at-5p                                                     | 3 |
| <i>circREPS2</i> | miR-548av-5p/548k/8054                                           | 1 |
| <i>circREPS2</i> | miR-548aw                                                        | 2 |
| <i>circREPS2</i> | miR-548ay-3p/548at-3p                                            | 2 |
| <i>circREPS2</i> | miR-548ay-5p/548au-5p/548as-5p/548ar-5p/548aq-5p/548ap-5p/548am- | 2 |
| <i>circREPS2</i> | miR-548az-5p/548t-5p                                             | 4 |
| <i>circREPS2</i> | miR-548b-3p                                                      | 2 |
| <i>circREPS2</i> | miR-548c-3p                                                      | 7 |
| <i>circREPS2</i> | miR-548e-5p                                                      | 4 |
| <i>circREPS2</i> | miR-548g-3p                                                      | 4 |
| <i>circREPS2</i> | miR-548l                                                         | 1 |
| <i>circREPS2</i> | miR-548n                                                         | 4 |
| <i>circREPS2</i> | miR-548p                                                         | 2 |
| <i>circREPS2</i> | miR-548s                                                         | 2 |
| <i>circREPS2</i> | miR-548u/7161-5p                                                 | 4 |
| <i>circREPS2</i> | miR-550b-2-5p                                                    | 1 |
| <i>circREPS2</i> | miR-551-3p                                                       | 1 |
| <i>circREPS2</i> | miR-551b-5p                                                      | 2 |
| <i>circREPS2</i> | miR-552-3p                                                       | 1 |
| <i>circREPS2</i> | miR-555                                                          | 1 |
| <i>circREPS2</i> | miR-556-5p                                                       | 1 |
| <i>circREPS2</i> | miR-5571-3p                                                      | 2 |
| <i>circREPS2</i> | miR-558                                                          | 2 |
| <i>circREPS2</i> | miR-5580-5p                                                      | 1 |
| <i>circREPS2</i> | miR-5582-5p                                                      | 1 |
| <i>circREPS2</i> | miR-5584-3p                                                      | 3 |
| <i>circREPS2</i> | miR-5585-3p                                                      | 4 |
| <i>circREPS2</i> | miR-5585-5p                                                      | 1 |
| <i>circREPS2</i> | miR-5586-3p                                                      | 2 |
| <i>circREPS2</i> | miR-5586-5p                                                      | 1 |
| <i>circREPS2</i> | miR-5588-3p                                                      | 1 |
| <i>circREPS2</i> | miR-5589-3p                                                      | 1 |
| <i>circREPS2</i> | miR-5590-5p                                                      | 1 |
| <i>circREPS2</i> | miR-561-3p                                                       | 3 |
| <i>circREPS2</i> | miR-567                                                          | 1 |

|                  |                  |   |
|------------------|------------------|---|
| <i>circREPS2</i> | miR-5680         | 5 |
| <i>circREPS2</i> | miR-5681a        | 2 |
| <i>circREPS2</i> | miR-5682         | 2 |
| <i>circREPS2</i> | miR-5683         | 1 |
| <i>circREPS2</i> | miR-5687         | 1 |
| <i>circREPS2</i> | miR-5690         | 1 |
| <i>circREPS2</i> | miR-5692bc       | 2 |
| <i>circREPS2</i> | miR-5693         | 2 |
| <i>circREPS2</i> | miR-5694         | 1 |
| <i>circREPS2</i> | miR-5695         | 3 |
| <i>circREPS2</i> | miR-5700         | 2 |
| <i>circREPS2</i> | miR-5707         | 2 |
| <i>circREPS2</i> | miR-571          | 1 |
| <i>circREPS2</i> | miR-573/3616-5p  | 1 |
| <i>circREPS2</i> | miR-5739         | 1 |
| <i>circREPS2</i> | miR-575/4676-5p  | 4 |
| <i>circREPS2</i> | miR-577          | 5 |
| <i>circREPS2</i> | miR-580-3p       | 2 |
| <i>circREPS2</i> | miR-582-5p       | 2 |
| <i>circREPS2</i> | miR-583          | 4 |
| <i>circREPS2</i> | miR-585-3p       | 1 |
| <i>circREPS2</i> | miR-585-5p       | 2 |
| <i>circREPS2</i> | miR-588          | 2 |
| <i>circREPS2</i> | miR-589-3p       | 4 |
| <i>circREPS2</i> | miR-592          | 2 |
| <i>circREPS2</i> | miR-593-3p       | 1 |
| <i>circREPS2</i> | miR-595          | 3 |
| <i>circREPS2</i> | miR-597-3p       | 1 |
| <i>circREPS2</i> | miR-598-5p       | 1 |
| <i>circREPS2</i> | miR-599          | 2 |
| <i>circREPS2</i> | miR-601          | 1 |
| <i>circREPS2</i> | miR-605-3p       | 1 |
| <i>circREPS2</i> | miR-607          | 3 |
| <i>circREPS2</i> | miR-6071         | 1 |
| <i>circREPS2</i> | miR-6074         | 1 |
| <i>circREPS2</i> | miR-6076/6797-3p | 3 |
| <i>circREPS2</i> | miR-6081         | 1 |
| <i>circREPS2</i> | miR-6083         | 1 |

|                  |                    |   |
|------------------|--------------------|---|
| <i>circREPS2</i> | miR-609            | 1 |
| <i>circREPS2</i> | miR-6090           | 1 |
| <i>circREPS2</i> | miR-610            | 1 |
| <i>circREPS2</i> | miR-6124           | 3 |
| <i>circREPS2</i> | miR-6131           | 1 |
| <i>circREPS2</i> | miR-6132/6836-5p   | 1 |
| <i>circREPS2</i> | miR-6134           | 1 |
| <i>circREPS2</i> | miR-615-3p         | 2 |
| <i>circREPS2</i> | miR-6165           | 2 |
| <i>circREPS2</i> | miR-618            | 2 |
| <i>circREPS2</i> | miR-619-5p/6506-5p | 3 |
| <i>circREPS2</i> | miR-621            | 1 |
| <i>circREPS2</i> | miR-622            | 1 |
| <i>circREPS2</i> | miR-625-3p         | 1 |
| <i>circREPS2</i> | miR-625-5p         | 2 |
| <i>circREPS2</i> | miR-627-3p         | 3 |
| <i>circREPS2</i> | miR-628-5p         | 2 |
| <i>circREPS2</i> | miR-629-3p         | 2 |
| <i>circREPS2</i> | miR-631/3661       | 3 |
| <i>circREPS2</i> | miR-632/4288       | 2 |
| <i>circREPS2</i> | miR-633            | 1 |
| <i>circREPS2</i> | miR-634            | 1 |
| <i>circREPS2</i> | miR-637            | 1 |
| <i>circREPS2</i> | miR-641/3617-5p    | 4 |
| <i>circREPS2</i> | miR-644a           | 1 |
| <i>circREPS2</i> | miR-646            | 1 |
| <i>circREPS2</i> | miR-647            | 3 |
| <i>circREPS2</i> | miR-648            | 2 |
| <i>circREPS2</i> | miR-649            | 1 |
| <i>circREPS2</i> | miR-6499-3p        | 2 |
| <i>circREPS2</i> | miR-6500-3p        | 6 |
| <i>circREPS2</i> | miR-6501-3p        | 1 |
| <i>circREPS2</i> | miR-6501-5p        | 3 |
| <i>circREPS2</i> | miR-6502-3p        | 2 |
| <i>circREPS2</i> | miR-6503-3p        | 1 |
| <i>circREPS2</i> | miR-6504-3p        | 1 |
| <i>circREPS2</i> | miR-6507-5p        | 4 |
| <i>circREPS2</i> | miR-6508-5p/8067   | 3 |



|                  |                             |   |
|------------------|-----------------------------|---|
| <i>circREPS2</i> | miR-6509-3p                 | 1 |
| <i>circREPS2</i> | miR-6510-5p                 | 2 |
| <i>circREPS2</i> | miR-6511-5p                 | 1 |
| <i>circREPS2</i> | miR-6513-3p                 | 3 |
| <i>circREPS2</i> | miR-6513-5p                 | 2 |
| <i>circREPS2</i> | miR-6514-3p                 | 1 |
| <i>circREPS2</i> | miR-6514-5p                 | 2 |
| <i>circREPS2</i> | miR-6515-3p                 | 1 |
| <i>circREPS2</i> | miR-6515-5p                 | 1 |
| <i>circREPS2</i> | miR-6516-5p                 | 2 |
| <i>circREPS2</i> | miR-653-3p                  | 2 |
| <i>circREPS2</i> | miR-653-5p                  | 1 |
| <i>circREPS2</i> | miR-654-5p                  | 1 |
| <i>circREPS2</i> | miR-655-5p                  | 1 |
| <i>circREPS2</i> | miR-656-3p                  | 5 |
| <i>circREPS2</i> | miR-656-5p                  | 3 |
| <i>circREPS2</i> | miR-657                     | 3 |
| <i>circREPS2</i> | miR-659-5p                  | 1 |
| <i>circREPS2</i> | miR-661                     | 2 |
| <i>circREPS2</i> | miR-664a-3p                 | 2 |
| <i>circREPS2</i> | miR-665                     | 1 |
| <i>circREPS2</i> | miR-670-5p                  | 2 |
| <i>circREPS2</i> | miR-6715a-3p                | 1 |
| <i>circREPS2</i> | miR-6715b-3p                | 1 |
| <i>circREPS2</i> | miR-6716-5p                 | 1 |
| <i>circREPS2</i> | miR-6719-3p                 | 2 |
| <i>circREPS2</i> | miR-6720-5p                 | 3 |
| <i>circREPS2</i> | miR-6728-3p                 | 1 |
| <i>circREPS2</i> | miR-6728-5p                 | 3 |
| <i>circREPS2</i> | miR-6729-3p                 | 1 |
| <i>circREPS2</i> | miR-6730-3p                 | 2 |
| <i>circREPS2</i> | miR-6730-5p                 | 2 |
| <i>circREPS2</i> | miR-6732-3p                 | 1 |
| <i>circREPS2</i> | miR-6732-5p                 | 2 |
| <i>circREPS2</i> | miR-6734-3p                 | 1 |
| <i>circREPS2</i> | miR-6734-5p                 | 3 |
| <i>circREPS2</i> | miR-6735-3p                 | 1 |
| <i>circREPS2</i> | miR-6737-5p/6812-5p/6819-5p | 1 |

|                  |                             |   |
|------------------|-----------------------------|---|
| <i>circREPS2</i> | miR-6739-3p                 | 2 |
| <i>circREPS2</i> | miR-6740-3p                 | 1 |
| <i>circREPS2</i> | miR-6740-5p                 | 2 |
| <i>circREPS2</i> | miR-6741-5p                 | 3 |
| <i>circREPS2</i> | miR-6742-5p                 | 1 |
| <i>circREPS2</i> | miR-6744-5p                 | 4 |
| <i>circREPS2</i> | miR-6748-3p                 | 1 |
| <i>circREPS2</i> | miR-6748-5p                 | 1 |
| <i>circREPS2</i> | miR-675-3p                  | 3 |
| <i>circREPS2</i> | miR-6750-3p                 | 1 |
| <i>circREPS2</i> | miR-6751-5p/6803-5p         | 2 |
| <i>circREPS2</i> | miR-6752-5p/6842-5p/7110-5p | 2 |
| <i>circREPS2</i> | miR-6753-3p/7107-3p         | 2 |
| <i>circREPS2</i> | miR-6753-5p                 | 1 |
| <i>circREPS2</i> | miR-6757-5p                 | 2 |
| <i>circREPS2</i> | miR-6758-5p/6856-5p         | 1 |
| <i>circREPS2</i> | miR-6759-5p                 | 2 |
| <i>circREPS2</i> | miR-676-3p                  | 1 |
| <i>circREPS2</i> | miR-676-5p                  | 2 |
| <i>circREPS2</i> | miR-6760-3p                 | 3 |
| <i>circREPS2</i> | miR-6760-5p                 | 2 |
| <i>circREPS2</i> | miR-6761-3p                 | 1 |
| <i>circREPS2</i> | miR-6761-5p                 | 2 |
| <i>circREPS2</i> | miR-6765-3p                 | 1 |
| <i>circREPS2</i> | miR-6767-5p                 | 1 |
| <i>circREPS2</i> | miR-6768-5p                 | 3 |
| <i>circREPS2</i> | miR-6769a-5p/6769b-5p       | 1 |
| <i>circREPS2</i> | miR-6770-5p                 | 1 |
| <i>circREPS2</i> | miR-6772-5p                 | 1 |
| <i>circREPS2</i> | miR-6776-3p                 | 1 |
| <i>circREPS2</i> | miR-6777-3p                 | 1 |
| <i>circREPS2</i> | miR-6778-3p                 | 1 |
| <i>circREPS2</i> | miR-6780b-3p                | 1 |
| <i>circREPS2</i> | miR-6782-3p                 | 1 |
| <i>circREPS2</i> | miR-6791-3p/6829-3p         | 1 |
| <i>circREPS2</i> | miR-6792-5p                 | 1 |
| <i>circREPS2</i> | miR-6793-3p                 | 1 |
| <i>circREPS2</i> | miR-6793-5p                 | 1 |

|                  |                     |   |
|------------------|---------------------|---|
| <i>circREPS2</i> | miR-6796-5p         | 2 |
| <i>circREPS2</i> | miR-6798-5p         | 2 |
| <i>circREPS2</i> | miR-6800-3p         | 1 |
| <i>circREPS2</i> | miR-6802-3p         | 1 |
| <i>circREPS2</i> | miR-6804-5p         | 1 |
| <i>circREPS2</i> | miR-6805-5p         | 2 |
| <i>circREPS2</i> | miR-6807-5p         | 3 |
| <i>circREPS2</i> | miR-6808-3p         | 1 |
| <i>circREPS2</i> | miR-6810-5p         | 1 |
| <i>circREPS2</i> | miR-6811-3p         | 2 |
| <i>circREPS2</i> | miR-6813-3p         | 1 |
| <i>circREPS2</i> | miR-6814-5p         | 1 |
| <i>circREPS2</i> | miR-6815-3p         | 1 |
| <i>circREPS2</i> | miR-6815-5p/6865-5p | 1 |
| <i>circREPS2</i> | miR-6816-3p         | 1 |
| <i>circREPS2</i> | miR-6818-3p         | 2 |
| <i>circREPS2</i> | miR-6818-5p         | 4 |
| <i>circREPS2</i> | miR-6822-3p         | 4 |
| <i>circREPS2</i> | miR-6823-5p         | 1 |
| <i>circREPS2</i> | miR-6826-3p         | 1 |
| <i>circREPS2</i> | miR-6826-5p         | 1 |
| <i>circREPS2</i> | miR-6827-5p         | 1 |
| <i>circREPS2</i> | miR-6828-3p         | 1 |
| <i>circREPS2</i> | miR-6831-3p         | 1 |
| <i>circREPS2</i> | miR-6832-3p         | 1 |
| <i>circREPS2</i> | miR-6834-3p         | 2 |
| <i>circREPS2</i> | miR-6834-5p         | 3 |
| <i>circREPS2</i> | miR-6835-5p         | 2 |
| <i>circREPS2</i> | miR-6836-3p         | 2 |
| <i>circREPS2</i> | miR-6837-3p         | 3 |
| <i>circREPS2</i> | miR-6840-3p         | 1 |
| <i>circREPS2</i> | miR-6842-3p         | 3 |
| <i>circREPS2</i> | miR-6843-3p/6848-3p | 2 |
| <i>circREPS2</i> | miR-6846-3p         | 1 |
| <i>circREPS2</i> | miR-6847-3p         | 1 |
| <i>circREPS2</i> | miR-6849-3p         | 1 |
| <i>circREPS2</i> | miR-6850-5p         | 2 |
| <i>circREPS2</i> | miR-6853-5p         | 1 |

|                  |             |   |
|------------------|-------------|---|
| <i>circREPS2</i> | miR-6854-3p | 2 |
| <i>circREPS2</i> | miR-6856-3p | 2 |
| <i>circREPS2</i> | miR-6857-3p | 2 |
| <i>circREPS2</i> | miR-6857-5p | 1 |
| <i>circREPS2</i> | miR-6858-3p | 4 |
| <i>circREPS2</i> | miR-6859-3p | 1 |
| <i>circREPS2</i> | miR-6861-3p | 1 |
| <i>circREPS2</i> | miR-6866-5p | 1 |
| <i>circREPS2</i> | miR-6867-3p | 1 |
| <i>circREPS2</i> | miR-6867-5p | 4 |
| <i>circREPS2</i> | miR-6868-3p | 1 |
| <i>circREPS2</i> | miR-6871-5p | 1 |
| <i>circREPS2</i> | miR-6873-5p | 2 |
| <i>circREPS2</i> | miR-6874-5p | 2 |
| <i>circREPS2</i> | miR-6875-3p | 5 |
| <i>circREPS2</i> | miR-6878-3p | 2 |
| <i>circREPS2</i> | miR-6881-5p | 2 |
| <i>circREPS2</i> | miR-6882-5p | 3 |
| <i>circREPS2</i> | miR-6886-3p | 1 |
| <i>circREPS2</i> | miR-6888-3p | 2 |
| <i>circREPS2</i> | miR-6888-5p | 4 |
| <i>circREPS2</i> | miR-6889-3p | 1 |
| <i>circREPS2</i> | miR-6890-3p | 3 |
| <i>circREPS2</i> | miR-6890-5p | 3 |
| <i>circREPS2</i> | miR-6894-3p | 1 |
| <i>circREPS2</i> | miR-6895-3p | 1 |
| <i>circREPS2</i> | miR-7-3p    | 3 |
| <i>circREPS2</i> | miR-708-3p  | 1 |
| <i>circREPS2</i> | miR-7108-5p | 1 |
| <i>circREPS2</i> | miR-7109-5p | 2 |
| <i>circREPS2</i> | miR-711     | 1 |
| <i>circREPS2</i> | miR-7112-3p | 1 |
| <i>circREPS2</i> | miR-7113-3p | 2 |
| <i>circREPS2</i> | miR-7113-5p | 2 |
| <i>circREPS2</i> | miR-7114-5p | 3 |
| <i>circREPS2</i> | miR-7151-5p | 2 |
| <i>circREPS2</i> | miR-7152-3p | 1 |
| <i>circREPS2</i> | miR-7153-3p | 2 |

|                  |              |   |
|------------------|--------------|---|
| <i>circREPS2</i> | miR-7154-5p  | 2 |
| <i>circREPS2</i> | miR-7155-5p  | 1 |
| <i>circREPS2</i> | miR-7158-3p  | 3 |
| <i>circREPS2</i> | miR-7159-5p  | 1 |
| <i>circREPS2</i> | miR-7160-5p  | 4 |
| <i>circREPS2</i> | miR-7161-3p  | 2 |
| <i>circREPS2</i> | miR-7162-3p  | 3 |
| <i>circREPS2</i> | miR-758-3p   | 1 |
| <i>circREPS2</i> | miR-758-5p   | 1 |
| <i>circREPS2</i> | miR-759      | 3 |
| <i>circREPS2</i> | miR-760      | 4 |
| <i>circREPS2</i> | miR-769-5p   | 2 |
| <i>circREPS2</i> | miR-7703     | 1 |
| <i>circREPS2</i> | miR-7843-3p  | 1 |
| <i>circREPS2</i> | miR-7844-5p  | 2 |
| <i>circREPS2</i> | miR-7845-5p  | 1 |
| <i>circREPS2</i> | miR-7847-3p  | 1 |
| <i>circREPS2</i> | miR-7850-5p  | 3 |
| <i>circREPS2</i> | miR-7854-3p  | 1 |
| <i>circREPS2</i> | miR-7973     | 4 |
| <i>circREPS2</i> | miR-7975     | 2 |
| <i>circREPS2</i> | miR-7977     | 1 |
| <i>circREPS2</i> | miR-8055     | 2 |
| <i>circREPS2</i> | miR-8056     | 1 |
| <i>circREPS2</i> | miR-8060     | 3 |
| <i>circREPS2</i> | miR-8062     | 2 |
| <i>circREPS2</i> | miR-8066     | 3 |
| <i>circREPS2</i> | miR-8068     | 1 |
| <i>circREPS2</i> | miR-8070     | 2 |
| <i>circREPS2</i> | miR-8077     | 4 |
| <i>circREPS2</i> | miR-8080     | 1 |
| <i>circREPS2</i> | miR-8083     | 1 |
| <i>circREPS2</i> | miR-8087     | 3 |
| <i>circREPS2</i> | miR-8088     | 1 |
| <i>circREPS2</i> | miR-873-5p.1 | 3 |
| <i>circREPS2</i> | miR-873-5p.2 | 1 |
| <i>circREPS2</i> | miR-874-3p   | 3 |
| <i>circREPS2</i> | miR-875-5p   | 1 |

|                  |                              |   |
|------------------|------------------------------|---|
| <i>circREPS2</i> | miR-876-3p                   | 1 |
| <i>circREPS2</i> | miR-877-3p                   | 1 |
| <i>circREPS2</i> | miR-877-5p                   | 1 |
| <i>circREPS2</i> | miR-885-5p                   | 2 |
| <i>circREPS2</i> | miR-887-5p                   | 2 |
| <i>circREPS2</i> | miR-888-5p                   | 1 |
| <i>circREPS2</i> | miR-889-3p                   | 1 |
| <i>circREPS2</i> | miR-890                      | 1 |
| <i>circREPS2</i> | miR-891a-3p                  | 1 |
| <i>circREPS2</i> | miR-891b                     | 2 |
| <i>circREPS2</i> | miR-892-5p                   | 2 |
| <i>circREPS2</i> | miR-892b                     | 2 |
| <i>circREPS2</i> | miR-9-5p                     | 1 |
| <i>circREPS2</i> | miR-920/4300/5591-5p/6726-5p | 1 |
| <i>circREPS2</i> | miR-921                      | 1 |
| <i>circREPS2</i> | miR-922                      | 2 |
| <i>circREPS2</i> | miR-92a-1-5p                 | 1 |
| <i>circREPS2</i> | miR-92a-2-5p                 | 1 |
| <i>circREPS2</i> | miR-938                      | 1 |
| <i>circREPS2</i> | miR-943                      | 1 |
| <i>circREPS2</i> | miR-944                      | 2 |
| <i>circREPS2</i> | miR-95-5p                    | 1 |
| <i>circREPS2</i> | miR-96-3p                    | 1 |
| <i>circREPS2</i> | miR-128-3p                   | 1 |
| <i>circREPS2</i> | miR-3150a-5p/3150b-5p        | 1 |
| <i>circREPS2</i> | miR-328-5p/6885-5p           | 2 |
| <i>circREPS2</i> | miR-3687/4442                | 1 |
| <i>circREPS2</i> | miR-5003-5p                  | 1 |
| <i>circREPS2</i> | miR-502-5p                   | 1 |
| <i>circREPS2</i> | miR-5193                     | 1 |
| <i>circREPS2</i> | miR-578                      | 1 |
| <i>circREPS2</i> | miR-597-5p                   | 1 |
| <i>circREPS2</i> | miR-615-5p                   | 1 |
| <i>circREPS2</i> | miR-660-3p                   | 1 |
| <i>circREPS2</i> | miR-668-3p                   | 1 |
| <i>circREPS2</i> | miR-6795-5p/6887-5p          | 2 |
| <i>circREPS2</i> | miR-7704                     | 1 |
| <i>circREXO4</i> | miR-10b-3p                   | 2 |

|                  |                                    |   |
|------------------|------------------------------------|---|
| <i>circREXO4</i> | miR-1180-5p                        | 1 |
| <i>circREXO4</i> | miR-1197                           | 1 |
| <i>circREXO4</i> | miR-1199-3p                        | 1 |
| <i>circREXO4</i> | miR-1227-5p                        | 2 |
| <i>circREXO4</i> | miR-1228-5p                        | 2 |
| <i>circREXO4</i> | miR-1233-3p                        | 1 |
| <i>circREXO4</i> | miR-1233-5p/6778-5p                | 1 |
| <i>circREXO4</i> | miR-1234-3p/7107-5p                | 1 |
| <i>circREXO4</i> | miR-1245b-5p                       | 1 |
| <i>circREXO4</i> | miR-1249-3p                        | 1 |
| <i>circREXO4</i> | miR-125-5p                         | 1 |
| <i>circREXO4</i> | miR-1252-5p                        | 2 |
| <i>circREXO4</i> | miR-1253                           | 2 |
| <i>circREXO4</i> | miR-1268a/1268b                    | 2 |
| <i>circREXO4</i> | miR-1269                           | 2 |
| <i>circREXO4</i> | miR-1273f                          | 4 |
| <i>circREXO4</i> | miR-1276                           | 2 |
| <i>circREXO4</i> | miR-1277-5p                        | 1 |
| <i>circREXO4</i> | miR-1288-3p                        | 2 |
| <i>circREXO4</i> | miR-1291/6775-3p                   | 2 |
| <i>circREXO4</i> | miR-1295b-5p/1912                  | 1 |
| <i>circREXO4</i> | miR-1296-3p                        | 3 |
| <i>circREXO4</i> | miR-1298-3p                        | 1 |
| <i>circREXO4</i> | miR-1305                           | 1 |
| <i>circREXO4</i> | miR-132-3p/212-3p                  | 1 |
| <i>circREXO4</i> | miR-138-2-3p                       | 1 |
| <i>circREXO4</i> | miR-143-3p                         | 4 |
| <i>circREXO4</i> | miR-144-5p                         | 1 |
| <i>circREXO4</i> | miR-146-5p                         | 1 |
| <i>circREXO4</i> | miR-1469                           | 1 |
| <i>circREXO4</i> | miR-146a-3p                        | 2 |
| <i>circREXO4</i> | miR-146b-3p                        | 1 |
| <i>circREXO4</i> | miR-149-3p/4728-5p/6785-5p/6883-5p | 2 |
| <i>circREXO4</i> | miR-151-5p                         | 1 |
| <i>circREXO4</i> | miR-16-1-3p                        | 2 |
| <i>circREXO4</i> | miR-181a-3p                        | 2 |
| <i>circREXO4</i> | miR-185-5p                         | 2 |
| <i>circREXO4</i> | miR-186-3p                         | 2 |

|                  |                                 |   |
|------------------|---------------------------------|---|
| <i>circREXO4</i> | miR-186-5p                      | 1 |
| <i>circREXO4</i> | miR-18b-3p                      | 2 |
| <i>circREXO4</i> | miR-1908-5p                     | 1 |
| <i>circREXO4</i> | miR-1909-3p/6722-3p             | 1 |
| <i>circREXO4</i> | miR-194-3p                      | 1 |
| <i>circREXO4</i> | miR-196b-3p                     | 1 |
| <i>circREXO4</i> | miR-1972                        | 1 |
| <i>circREXO4</i> | miR-198                         | 1 |
| <i>circREXO4</i> | miR-202-3p                      | 2 |
| <i>circREXO4</i> | miR-2114-3p                     | 2 |
| <i>circREXO4</i> | miR-212-5p                      | 2 |
| <i>circREXO4</i> | miR-22-3p                       | 1 |
| <i>circREXO4</i> | miR-223-3p                      | 1 |
| <i>circREXO4</i> | miR-2277-3p                     | 1 |
| <i>circREXO4</i> | miR-2278                        | 3 |
| <i>circREXO4</i> | miR-2467-3p                     | 2 |
| <i>circREXO4</i> | miR-26-5p                       | 1 |
| <i>circREXO4</i> | miR-27b-5p                      | 2 |
| <i>circREXO4</i> | miR-296-5p                      | 2 |
| <i>circREXO4</i> | miR-298                         | 2 |
| <i>circREXO4</i> | miR-29b-2-5p                    | 1 |
| <i>circREXO4</i> | miR-302-3p/372-3p/373-3p/520-3p | 2 |
| <i>circREXO4</i> | miR-3115                        | 2 |
| <i>circREXO4</i> | miR-3117-3p                     | 1 |
| <i>circREXO4</i> | miR-3123                        | 2 |
| <i>circREXO4</i> | miR-3126-3p                     | 1 |
| <i>circREXO4</i> | miR-3130-5p/4482-5p             | 1 |
| <i>circREXO4</i> | miR-3133                        | 1 |
| <i>circREXO4</i> | miR-3138                        | 1 |
| <i>circREXO4</i> | miR-3147                        | 1 |
| <i>circREXO4</i> | miR-3150a-5p/3150b-5p           | 1 |
| <i>circREXO4</i> | miR-3150b-3p                    | 2 |
| <i>circREXO4</i> | miR-3151-5p                     | 2 |
| <i>circREXO4</i> | miR-3154                        | 2 |
| <i>circREXO4</i> | miR-3157-5p                     | 2 |
| <i>circREXO4</i> | miR-3173-5p                     | 1 |
| <i>circREXO4</i> | miR-3175                        | 2 |
| <i>circREXO4</i> | miR-3179                        | 2 |



|                  |                           |   |
|------------------|---------------------------|---|
| <i>circREXO4</i> | miR-3189-3p               | 2 |
| <i>circREXO4</i> | miR-3194-3p               | 1 |
| <i>circREXO4</i> | miR-3197                  | 1 |
| <i>circREXO4</i> | miR-3201/4791             | 1 |
| <i>circREXO4</i> | miR-320e                  | 1 |
| <i>circREXO4</i> | miR-329-3p/362-3p         | 1 |
| <i>circREXO4</i> | miR-335-5p                | 3 |
| <i>circREXO4</i> | miR-340-5p                | 1 |
| <i>circREXO4</i> | miR-3613-3p               | 1 |
| <i>circREXO4</i> | miR-3614-3p               | 4 |
| <i>circREXO4</i> | miR-3616-3p               | 1 |
| <i>circREXO4</i> | miR-3621                  | 1 |
| <i>circREXO4</i> | miR-3656                  | 1 |
| <i>circREXO4</i> | miR-3657                  | 2 |
| <i>circREXO4</i> | miR-3660/4526             | 2 |
| <i>circREXO4</i> | miR-3677-5p               | 2 |
| <i>circREXO4</i> | miR-3688-5p               | 2 |
| <i>circREXO4</i> | miR-374c-3p               | 2 |
| <i>circREXO4</i> | miR-381-5p                | 2 |
| <i>circREXO4</i> | miR-382-5p                | 2 |
| <i>circREXO4</i> | miR-3912-5p               | 2 |
| <i>circREXO4</i> | miR-3913-3p               | 1 |
| <i>circREXO4</i> | miR-3919                  | 3 |
| <i>circREXO4</i> | miR-3925-5p               | 2 |
| <i>circREXO4</i> | miR-3926                  | 1 |
| <i>circREXO4</i> | miR-3928-3p               | 1 |
| <i>circREXO4</i> | miR-3928-5p/6806-3p       | 1 |
| <i>circREXO4</i> | miR-3936                  | 2 |
| <i>circREXO4</i> | miR-3940-3p               | 1 |
| <i>circREXO4</i> | miR-3942-3p               | 2 |
| <i>circREXO4</i> | miR-410-3p                | 1 |
| <i>circREXO4</i> | miR-425-3p                | 1 |
| <i>circREXO4</i> | miR-4251                  | 1 |
| <i>circREXO4</i> | miR-4257                  | 1 |
| <i>circREXO4</i> | miR-4259                  | 1 |
| <i>circREXO4</i> | miR-4261                  | 1 |
| <i>circREXO4</i> | miR-4271/4725-3p/6780b-5p | 1 |
| <i>circREXO4</i> | miR-4276                  | 1 |

|                  |                                              |   |
|------------------|----------------------------------------------|---|
| <i>circREXO4</i> | miR-4297/5581-5p                             | 1 |
| <i>circREXO4</i> | miR-4311                                     | 2 |
| <i>circREXO4</i> | miR-4312                                     | 2 |
| <i>circREXO4</i> | miR-4318                                     | 2 |
| <i>circREXO4</i> | miR-432-5p                                   | 2 |
| <i>circREXO4</i> | miR-4320                                     | 1 |
| <i>circREXO4</i> | miR-4324                                     | 1 |
| <i>circREXO4</i> | miR-4329                                     | 1 |
| <i>circREXO4</i> | miR-4417                                     | 4 |
| <i>circREXO4</i> | miR-4425                                     | 1 |
| <i>circREXO4</i> | miR-4436b-3p/4632-5p/6735-5p/6879-5p/7843-5p | 1 |
| <i>circREXO4</i> | miR-4447/4472                                | 2 |
| <i>circREXO4</i> | miR-4453/4538                                | 2 |
| <i>circREXO4</i> | miR-4460                                     | 2 |
| <i>circREXO4</i> | miR-4467                                     | 1 |
| <i>circREXO4</i> | miR-4468                                     | 1 |
| <i>circREXO4</i> | miR-4476/6876-5p                             | 2 |
| <i>circREXO4</i> | miR-4480                                     | 1 |
| <i>circREXO4</i> | miR-4496                                     | 1 |
| <i>circREXO4</i> | miR-450b-3p/769-3p                           | 1 |
| <i>circREXO4</i> | miR-4515                                     | 2 |
| <i>circREXO4</i> | miR-4520-2-3p                                | 2 |
| <i>circREXO4</i> | miR-4521                                     | 2 |
| <i>circREXO4</i> | miR-4523                                     | 1 |
| <i>circREXO4</i> | miR-4529-3p                                  | 2 |
| <i>circREXO4</i> | miR-4535                                     | 1 |
| <i>circREXO4</i> | miR-4632-3p                                  | 2 |
| <i>circREXO4</i> | miR-4635                                     | 2 |
| <i>circREXO4</i> | miR-4648                                     | 1 |
| <i>circREXO4</i> | miR-4650-5p                                  | 1 |
| <i>circREXO4</i> | miR-4654/4769-5p                             | 1 |
| <i>circREXO4</i> | miR-4659a-5p/4659b-5p                        | 1 |
| <i>circREXO4</i> | miR-4662a-3p                                 | 1 |
| <i>circREXO4</i> | miR-4665-3p                                  | 1 |
| <i>circREXO4</i> | miR-4669                                     | 2 |
| <i>circREXO4</i> | miR-4670-3p                                  | 2 |
| <i>circREXO4</i> | miR-4677-3p                                  | 2 |
| <i>circREXO4</i> | miR-4679                                     | 2 |

|                  |                                  |   |
|------------------|----------------------------------|---|
| <i>circREXO4</i> | miR-4690-5p                      | 2 |
| <i>circREXO4</i> | miR-4697-3p                      | 1 |
| <i>circREXO4</i> | miR-4699-5p                      | 1 |
| <i>circREXO4</i> | miR-4708-5p                      | 4 |
| <i>circREXO4</i> | miR-4715-5p                      | 1 |
| <i>circREXO4</i> | miR-4716-3p/6794-5p              | 2 |
| <i>circREXO4</i> | miR-4721                         | 1 |
| <i>circREXO4</i> | miR-4723-5p/5698/6870-5p/7111-5p | 2 |
| <i>circREXO4</i> | miR-4727-3p                      | 2 |
| <i>circREXO4</i> | miR-4728-3p                      | 2 |
| <i>circREXO4</i> | miR-4732-3p                      | 1 |
| <i>circREXO4</i> | miR-4738-5p                      | 1 |
| <i>circREXO4</i> | miR-4740-5p                      | 2 |
| <i>circREXO4</i> | miR-4747-5p/5196-5p              | 3 |
| <i>circREXO4</i> | miR-4756-3p                      | 3 |
| <i>circREXO4</i> | miR-4761-3p                      | 3 |
| <i>circREXO4</i> | miR-4769-3p/6817-5p              | 1 |
| <i>circREXO4</i> | miR-4776-5p                      | 1 |
| <i>circREXO4</i> | miR-4795-5p                      | 4 |
| <i>circREXO4</i> | miR-4796-3p                      | 2 |
| <i>circREXO4</i> | miR-4800-5p                      | 1 |
| <i>circREXO4</i> | miR-486-3p                       | 2 |
| <i>circREXO4</i> | miR-488-3p                       | 1 |
| <i>circREXO4</i> | miR-491-5p                       | 2 |
| <i>circREXO4</i> | miR-494-3p                       | 1 |
| <i>circREXO4</i> | miR-495-5p                       | 2 |
| <i>circREXO4</i> | miR-497-3p                       | 2 |
| <i>circREXO4</i> | miR-498                          | 1 |
| <i>circREXO4</i> | miR-5007-5p                      | 1 |
| <i>circREXO4</i> | miR-5009-5p/8058                 | 2 |
| <i>circREXO4</i> | miR-5010-5p                      | 2 |
| <i>circREXO4</i> | miR-505-5p                       | 1 |
| <i>circREXO4</i> | miR-5087                         | 1 |
| <i>circREXO4</i> | miR-5089-5p                      | 1 |
| <i>circREXO4</i> | miR-519-3p                       | 2 |
| <i>circREXO4</i> | miR-5192                         | 2 |
| <i>circREXO4</i> | miR-5197-3p                      | 3 |
| <i>circREXO4</i> | miR-525-5p                       | 1 |

|                  |                  |   |
|------------------|------------------|---|
| <i>circREXO4</i> | miR-526b-5p      | 1 |
| <i>circREXO4</i> | miR-544b         | 1 |
| <i>circREXO4</i> | miR-548g-3p      | 1 |
| <i>circREXO4</i> | miR-5571-5p      | 2 |
| <i>circREXO4</i> | miR-5590-5p      | 1 |
| <i>circREXO4</i> | miR-564          | 2 |
| <i>circREXO4</i> | miR-5680         | 1 |
| <i>circREXO4</i> | miR-5693         | 1 |
| <i>circREXO4</i> | miR-5697         | 3 |
| <i>circREXO4</i> | miR-5702         | 1 |
| <i>circREXO4</i> | miR-573/3616-5p  | 2 |
| <i>circREXO4</i> | miR-574-3p       | 1 |
| <i>circREXO4</i> | miR-578          | 1 |
| <i>circREXO4</i> | miR-580-3p       | 1 |
| <i>circREXO4</i> | miR-583          | 2 |
| <i>circREXO4</i> | miR-585-3p       | 2 |
| <i>circREXO4</i> | miR-589-5p       | 1 |
| <i>circREXO4</i> | miR-598-3p       | 2 |
| <i>circREXO4</i> | miR-603          | 1 |
| <i>circREXO4</i> | miR-6077         | 1 |
| <i>circREXO4</i> | miR-6080         | 2 |
| <i>circREXO4</i> | miR-6087         | 1 |
| <i>circREXO4</i> | miR-611/3131     | 1 |
| <i>circREXO4</i> | miR-6126         | 2 |
| <i>circREXO4</i> | miR-6132/6836-5p | 1 |
| <i>circREXO4</i> | miR-615-3p       | 1 |
| <i>circREXO4</i> | miR-6165         | 2 |
| <i>circREXO4</i> | miR-625-3p       | 1 |
| <i>circREXO4</i> | miR-625-5p       | 2 |
| <i>circREXO4</i> | miR-628-5p       | 2 |
| <i>circREXO4</i> | miR-641/3617-5p  | 1 |
| <i>circREXO4</i> | miR-642-3p       | 1 |
| <i>circREXO4</i> | miR-6501-3p      | 1 |
| <i>circREXO4</i> | miR-6503-3p      | 1 |
| <i>circREXO4</i> | miR-651-3p       | 2 |
| <i>circREXO4</i> | miR-6510-5p      | 2 |
| <i>circREXO4</i> | miR-654-5p       | 2 |
| <i>circREXO4</i> | miR-665          | 2 |

|                  |                       |   |
|------------------|-----------------------|---|
| <i>circREXO4</i> | miR-6715a-3p          | 2 |
| <i>circREXO4</i> | miR-6715b-3p          | 2 |
| <i>circREXO4</i> | miR-6719-3p           | 2 |
| <i>circREXO4</i> | miR-6721-5p           | 3 |
| <i>circREXO4</i> | miR-6724-5p/6773-5p   | 2 |
| <i>circREXO4</i> | miR-6728-3p           | 1 |
| <i>circREXO4</i> | miR-6728-5p           | 1 |
| <i>circREXO4</i> | miR-6730-3p           | 2 |
| <i>circREXO4</i> | miR-6732-5p           | 2 |
| <i>circREXO4</i> | miR-6735-3p           | 1 |
| <i>circREXO4</i> | miR-6739-3p           | 2 |
| <i>circREXO4</i> | miR-6742-5p           | 2 |
| <i>circREXO4</i> | miR-6761-5p           | 1 |
| <i>circREXO4</i> | miR-6768-5p           | 1 |
| <i>circREXO4</i> | miR-6769a-5p/6769b-5p | 2 |
| <i>circREXO4</i> | miR-6770-5p           | 2 |
| <i>circREXO4</i> | miR-6771-5p           | 1 |
| <i>circREXO4</i> | miR-6782-3p           | 1 |
| <i>circREXO4</i> | miR-6783-5p           | 1 |
| <i>circREXO4</i> | miR-6787-3p           | 1 |
| <i>circREXO4</i> | miR-6798-5p           | 1 |
| <i>circREXO4</i> | miR-6799-5p           | 2 |
| <i>circREXO4</i> | miR-6801-5p           | 2 |
| <i>circREXO4</i> | miR-6805-5p           | 2 |
| <i>circREXO4</i> | miR-6812-3p           | 1 |
| <i>circREXO4</i> | miR-6819-3p/6877-3p   | 2 |
| <i>circREXO4</i> | miR-6825-5p           | 2 |
| <i>circREXO4</i> | miR-6827-5p           | 2 |
| <i>circREXO4</i> | miR-6847-5p           | 1 |
| <i>circREXO4</i> | miR-6851-3p           | 2 |
| <i>circREXO4</i> | miR-6853-5p           | 2 |
| <i>circREXO4</i> | miR-6854-3p           | 2 |
| <i>circREXO4</i> | miR-6864-5p           | 2 |
| <i>circREXO4</i> | miR-6867-5p           | 2 |
| <i>circREXO4</i> | miR-6871-5p           | 2 |
| <i>circREXO4</i> | miR-6882-3p           | 1 |
| <i>circREXO4</i> | miR-6882-5p           | 2 |
| <i>circREXO4</i> | miR-6888-5p           | 2 |

|                   |                                       |    |
|-------------------|---------------------------------------|----|
| <i>circREXO4</i>  | miR-6892-5p                           | 2  |
| <i>circREXO4</i>  | miR-6894-5p                           | 2  |
| <i>circREXO4</i>  | miR-7-5p                              | 1  |
| <i>circREXO4</i>  | miR-7106-5p                           | 2  |
| <i>circREXO4</i>  | miR-711                               | 1  |
| <i>circREXO4</i>  | miR-7150                              | 2  |
| <i>circREXO4</i>  | miR-7154-3p                           | 2  |
| <i>circREXO4</i>  | miR-7515                              | 2  |
| <i>circREXO4</i>  | miR-765                               | 2  |
| <i>circREXO4</i>  | miR-766-5p                            | 2  |
| <i>circREXO4</i>  | miR-7846-3p                           | 1  |
| <i>circREXO4</i>  | miR-7976                              | 1  |
| <i>circREXO4</i>  | miR-8069                              | 2  |
| <i>circREXO4</i>  | miR-8485                              | 1  |
| <i>circREXO4</i>  | miR-885-3p                            | 1  |
| <i>circREXO4</i>  | miR-891a-3p                           | 2  |
| <i>circREXO4</i>  | miR-892a                              | 2  |
| <i>circREXO4</i>  | miR-92a-2-5p                          | 2  |
| <i>circREXO4</i>  | miR-939-5p/1343-5p                    | 2  |
| <i>circREXO4</i>  | miR-942-3p                            | 1  |
| <i>circREXO4</i>  | miR-1306-5p                           | 1  |
| <i>circREXO4</i>  | miR-3622a-3p/3622b-3p                 | 1  |
| <i>circREXO4</i>  | miR-4270/4441/6754-5p                 | 1  |
| <i>circREXO4</i>  | miR-5584-5p                           | 1  |
| <i>circREXO4</i>  | miR-6750-5p/6822-5p                   | 1  |
| <i>circREXO4</i>  | miR-6765-3p                           | 1  |
| <i>circREXO4</i>  | miR-6776-3p                           | 1  |
| <i>circREXO4</i>  | miR-9500                              | 1  |
| <i>circRHBDD1</i> | let-7a-3p/let-7b-3p/let-7f-1-3p/98-3p | 11 |
| <i>circRHBDD1</i> | let-7f-2-3p/1185-3p                   | 11 |
| <i>circRHBDD1</i> | miR-101-3p.2                          | 6  |
| <i>circRHBDD1</i> | miR-103a-2-5p                         | 9  |
| <i>circRHBDD1</i> | miR-105-5p                            | 4  |
| <i>circRHBDD1</i> | miR-10a-3p                            | 3  |
| <i>circRHBDD1</i> | miR-1180-5p                           | 1  |
| <i>circRHBDD1</i> | miR-1200                              | 4  |
| <i>circRHBDD1</i> | miR-1202/3972                         | 4  |
| <i>circRHBDD1</i> | miR-1206                              | 3  |

|                   |                      |    |
|-------------------|----------------------|----|
| <i>circRHBDD1</i> | miR-1207-5p/4763-3p  | 5  |
| <i>circRHBDD1</i> | miR-1226-5p          | 12 |
| <i>circRHBDD1</i> | miR-124-3p.1         | 6  |
| <i>circRHBDD1</i> | miR-124-3p.2/506-3p  | 5  |
| <i>circRHBDD1</i> | miR-1245b-3p         | 9  |
| <i>circRHBDD1</i> | miR-1246             | 4  |
| <i>circRHBDD1</i> | miR-1252-3p          | 2  |
| <i>circRHBDD1</i> | miR-1255b-2-3p       | 5  |
| <i>circRHBDD1</i> | miR-125a-3p          | 13 |
| <i>circRHBDD1</i> | miR-1266-5p/4518     | 8  |
| <i>circRHBDD1</i> | miR-1277-5p          | 1  |
| <i>circRHBDD1</i> | miR-1279             | 5  |
| <i>circRHBDD1</i> | miR-1286             | 6  |
| <i>circRHBDD1</i> | miR-129-5p           | 4  |
| <i>circRHBDD1</i> | miR-1295b-3p         | 4  |
| <i>circRHBDD1</i> | miR-1298-3p          | 8  |
| <i>circRHBDD1</i> | miR-1304-5p          | 6  |
| <i>circRHBDD1</i> | miR-1305             | 2  |
| <i>circRHBDD1</i> | miR-1323             | 2  |
| <i>circRHBDD1</i> | miR-133a-5p          | 4  |
| <i>circRHBDD1</i> | miR-138-5p           | 4  |
| <i>circRHBDD1</i> | miR-139-3p           | 6  |
| <i>circRHBDD1</i> | miR-139-5p           | 3  |
| <i>circRHBDD1</i> | miR-141-3p/200-3p    | 5  |
| <i>circRHBDD1</i> | miR-142-5p           | 3  |
| <i>circRHBDD1</i> | miR-144-5p           | 9  |
| <i>circRHBDD1</i> | miR-145-5p           | 10 |
| <i>circRHBDD1</i> | miR-1468-5p          | 7  |
| <i>circRHBDD1</i> | miR-148a-5p          | 2  |
| <i>circRHBDD1</i> | miR-16-1-3p          | 6  |
| <i>circRHBDD1</i> | miR-185-5p           | 5  |
| <i>circRHBDD1</i> | miR-188-5p           | 6  |
| <i>circRHBDD1</i> | miR-1910-3p/6511a-5p | 6  |
| <i>circRHBDD1</i> | miR-192-3p           | 7  |
| <i>circRHBDD1</i> | miR-194-3p           | 6  |
| <i>circRHBDD1</i> | miR-194-5p           | 4  |
| <i>circRHBDD1</i> | miR-196a-3p          | 3  |
| <i>circRHBDD1</i> | miR-1976             | 2  |

|                   |                                     |    |
|-------------------|-------------------------------------|----|
| <i>circRHBDD1</i> | miR-198                             | 6  |
| <i>circRHBDD1</i> | miR-203b-3p                         | 5  |
| <i>circRHBDD1</i> | miR-2053                            | 1  |
| <i>circRHBDD1</i> | miR-2110                            | 6  |
| <i>circRHBDD1</i> | miR-223-3p                          | 7  |
| <i>circRHBDD1</i> | miR-224-5p                          | 3  |
| <i>circRHBDD1</i> | miR-2276-5p                         | 6  |
| <i>circRHBDD1</i> | miR-2278                            | 12 |
| <i>circRHBDD1</i> | miR-2392                            | 4  |
| <i>circRHBDD1</i> | miR-25-3p/32-5p/92-3p/363-3p/367-3p | 4  |
| <i>circRHBDD1</i> | miR-26b-3p                          | 4  |
| <i>circRHBDD1</i> | miR-28-5p/708-5p                    | 5  |
| <i>circRHBDD1</i> | miR-296-3p                          | 6  |
| <i>circRHBDD1</i> | miR-30-3p                           | 8  |
| <i>circRHBDD1</i> | miR-30-5p                           | 4  |
| <i>circRHBDD1</i> | miR-302f                            | 4  |
| <i>circRHBDD1</i> | miR-3065-3p                         | 2  |
| <i>circRHBDD1</i> | miR-3065-5p                         | 4  |
| <i>circRHBDD1</i> | miR-3074-3p                         | 7  |
| <i>circRHBDD1</i> | miR-3120-3p                         | 7  |
| <i>circRHBDD1</i> | miR-3124-3p                         | 4  |
| <i>circRHBDD1</i> | miR-3126-3p                         | 8  |
| <i>circRHBDD1</i> | miR-3127-5p                         | 8  |
| <i>circRHBDD1</i> | miR-3143                            | 5  |
| <i>circRHBDD1</i> | miR-3144-3p                         | 4  |
| <i>circRHBDD1</i> | miR-3145-5p                         | 4  |
| <i>circRHBDD1</i> | miR-3148                            | 8  |
| <i>circRHBDD1</i> | miR-3150a-3p                        | 6  |
| <i>circRHBDD1</i> | miR-3153/6733-5p/6739-5p            | 15 |
| <i>circRHBDD1</i> | miR-3161                            | 4  |
| <i>circRHBDD1</i> | miR-3165                            | 6  |
| <i>circRHBDD1</i> | miR-3173-3p/6891-5p                 | 8  |
| <i>circRHBDD1</i> | miR-3175                            | 10 |
| <i>circRHBDD1</i> | miR-3179                            | 5  |
| <i>circRHBDD1</i> | miR-3180-5p                         | 5  |
| <i>circRHBDD1</i> | miR-3182                            | 7  |
| <i>circRHBDD1</i> | miR-3185                            | 6  |
| <i>circRHBDD1</i> | miR-3187-3p                         | 7  |



|                   |                                   |   |
|-------------------|-----------------------------------|---|
| <i>circRHBDD1</i> | miR-3190-3p                       | 6 |
| <i>circRHBDD1</i> | miR-323a-5p                       | 7 |
| <i>circRHBDD1</i> | miR-323b-5p/410-5p/494-5p         | 1 |
| <i>circRHBDD1</i> | miR-330-3p                        | 4 |
| <i>circRHBDD1</i> | miR-330-3p.2                      | 3 |
| <i>circRHBDD1</i> | miR-335-5p                        | 4 |
| <i>circRHBDD1</i> | miR-33a-3p                        | 1 |
| <i>circRHBDD1</i> | miR-34a-3p                        | 4 |
| <i>circRHBDD1</i> | miR-34b-5p/449c-5p                | 6 |
| <i>circRHBDD1</i> | miR-3605-3p                       | 7 |
| <i>circRHBDD1</i> | miR-361-5p                        | 7 |
| <i>circRHBDD1</i> | miR-3616-3p                       | 7 |
| <i>circRHBDD1</i> | miR-3617-3p                       | 4 |
| <i>circRHBDD1</i> | miR-3646                          | 2 |
| <i>circRHBDD1</i> | miR-365-3p                        | 5 |
| <i>circRHBDD1</i> | miR-3651                          | 1 |
| <i>circRHBDD1</i> | miR-3653-3p                       | 2 |
| <i>circRHBDD1</i> | miR-3653-5p                       | 2 |
| <i>circRHBDD1</i> | miR-3658                          | 1 |
| <i>circRHBDD1</i> | miR-3662                          | 5 |
| <i>circRHBDD1</i> | miR-3664-3p                       | 8 |
| <i>circRHBDD1</i> | miR-3665                          | 4 |
| <i>circRHBDD1</i> | miR-3677-5p                       | 6 |
| <i>circRHBDD1</i> | miR-3682-5p                       | 4 |
| <i>circRHBDD1</i> | miR-3688-3p                       | 6 |
| <i>circRHBDD1</i> | miR-3689a-5p/3689b-5p/3689e/3689f | 4 |
| <i>circRHBDD1</i> | miR-369-5p                        | 1 |
| <i>circRHBDD1</i> | miR-3714                          | 6 |
| <i>circRHBDD1</i> | miR-376a-2-5p                     | 4 |
| <i>circRHBDD1</i> | miR-376a-5p                       | 4 |
| <i>circRHBDD1</i> | miR-376c-3p                       | 4 |
| <i>circRHBDD1</i> | miR-378a-5p                       | 4 |
| <i>circRHBDD1</i> | miR-381-3p                        | 4 |
| <i>circRHBDD1</i> | miR-382-5p                        | 6 |
| <i>circRHBDD1</i> | miR-383-3p                        | 2 |
| <i>circRHBDD1</i> | miR-3908                          | 7 |
| <i>circRHBDD1</i> | miR-3910                          | 6 |
| <i>circRHBDD1</i> | miR-3918                          | 1 |

|                   |                                              |    |
|-------------------|----------------------------------------------|----|
| <i>circRHBDD1</i> | miR-3925-3p                                  | 5  |
| <i>circRHBDD1</i> | miR-3926                                     | 7  |
| <i>circRHBDD1</i> | miR-3934-3p                                  | 7  |
| <i>circRHBDD1</i> | miR-3934-5p                                  | 13 |
| <i>circRHBDD1</i> | miR-3936                                     | 4  |
| <i>circRHBDD1</i> | miR-3942-5p                                  | 7  |
| <i>circRHBDD1</i> | miR-3973                                     | 7  |
| <i>circRHBDD1</i> | miR-409-3p                                   | 7  |
| <i>circRHBDD1</i> | miR-411-5p.1                                 | 6  |
| <i>circRHBDD1</i> | miR-424-3p                                   | 7  |
| <i>circRHBDD1</i> | miR-4251                                     | 2  |
| <i>circRHBDD1</i> | miR-4261                                     | 8  |
| <i>circRHBDD1</i> | miR-4268                                     | 2  |
| <i>circRHBDD1</i> | miR-4270/4441/6754-5p                        | 8  |
| <i>circRHBDD1</i> | miR-4274                                     | 4  |
| <i>circRHBDD1</i> | miR-4282                                     | 3  |
| <i>circRHBDD1</i> | miR-4291                                     | 11 |
| <i>circRHBDD1</i> | miR-4299                                     | 1  |
| <i>circRHBDD1</i> | miR-4303                                     | 6  |
| <i>circRHBDD1</i> | miR-4310/7157-5p                             | 4  |
| <i>circRHBDD1</i> | miR-4314                                     | 6  |
| <i>circRHBDD1</i> | miR-432-3p                                   | 4  |
| <i>circRHBDD1</i> | miR-4324                                     | 2  |
| <i>circRHBDD1</i> | miR-4328                                     | 8  |
| <i>circRHBDD1</i> | miR-4329                                     | 2  |
| <i>circRHBDD1</i> | miR-4422                                     | 3  |
| <i>circRHBDD1</i> | miR-4423-3p                                  | 4  |
| <i>circRHBDD1</i> | miR-4427                                     | 2  |
| <i>circRHBDD1</i> | miR-4428                                     | 8  |
| <i>circRHBDD1</i> | miR-4433a-3p                                 | 6  |
| <i>circRHBDD1</i> | miR-4433b-3p                                 | 6  |
| <i>circRHBDD1</i> | miR-4435                                     | 7  |
| <i>circRHBDD1</i> | miR-4436b-3p/4632-5p/6735-5p/6879-5p/7843-5p |    |
| <i>circRHBDD1</i> | miR-4448                                     | 2  |
| <i>circRHBDD1</i> | miR-4456                                     | 1  |
| <i>circRHBDD1</i> | miR-4457                                     | 1  |
| <i>circRHBDD1</i> | miR-4459                                     | 6  |
| <i>circRHBDD1</i> | miR-4468                                     | 8  |

|                   |                          |    |
|-------------------|--------------------------|----|
| <i>circRHBDD1</i> | miR-4470                 | 4  |
| <i>circRHBDD1</i> | miR-4490                 | 4  |
| <i>circRHBDD1</i> | miR-4496                 | 2  |
| <i>circRHBDD1</i> | miR-449c-3p              | 6  |
| <i>circRHBDD1</i> | miR-4504                 | 6  |
| <i>circRHBDD1</i> | miR-4506                 | 7  |
| <i>circRHBDD1</i> | miR-4511                 | 8  |
| <i>circRHBDD1</i> | miR-4512                 | 8  |
| <i>circRHBDD1</i> | miR-4519                 | 4  |
| <i>circRHBDD1</i> | miR-4521                 | 4  |
| <i>circRHBDD1</i> | miR-4539                 | 5  |
| <i>circRHBDD1</i> | miR-4633-3p/6500-5p      | 5  |
| <i>circRHBDD1</i> | miR-4640-5p              | 8  |
| <i>circRHBDD1</i> | miR-4649-3p              | 6  |
| <i>circRHBDD1</i> | miR-4659a-5p/4659b-5p    | 6  |
| <i>circRHBDD1</i> | miR-4662-5p              | 1  |
| <i>circRHBDD1</i> | miR-4666a-3p             | 4  |
| <i>circRHBDD1</i> | miR-4666b                | 7  |
| <i>circRHBDD1</i> | miR-4667-5p/4700-5p/8089 | 6  |
| <i>circRHBDD1</i> | miR-4668-5p              | 15 |
| <i>circRHBDD1</i> | miR-4678                 | 12 |
| <i>circRHBDD1</i> | miR-4680-3p              | 2  |
| <i>circRHBDD1</i> | miR-4683                 | 6  |
| <i>circRHBDD1</i> | miR-4684-3p              | 7  |
| <i>circRHBDD1</i> | miR-4685-5p/6837-5p      | 1  |
| <i>circRHBDD1</i> | miR-4690-5p              | 5  |
| <i>circRHBDD1</i> | miR-4695-3p              | 7  |
| <i>circRHBDD1</i> | miR-4696                 | 5  |
| <i>circRHBDD1</i> | miR-4697-3p              | 7  |
| <i>circRHBDD1</i> | miR-4698                 | 1  |
| <i>circRHBDD1</i> | miR-4699-5p              | 6  |
| <i>circRHBDD1</i> | miR-4700-3p              | 1  |
| <i>circRHBDD1</i> | miR-4704-5p              | 4  |
| <i>circRHBDD1</i> | miR-4705                 | 4  |
| <i>circRHBDD1</i> | miR-4709-5p              | 3  |
| <i>circRHBDD1</i> | miR-4710                 | 1  |
| <i>circRHBDD1</i> | miR-4721                 | 7  |
| <i>circRHBDD1</i> | miR-4722-5p              | 6  |

|                   |                     |    |
|-------------------|---------------------|----|
| <i>circRHBDD1</i> | miR-4733-5p         | 9  |
| <i>circRHBDD1</i> | miR-4736            | 5  |
| <i>circRHBDD1</i> | miR-4746-3p         | 4  |
| <i>circRHBDD1</i> | miR-4761-3p         | 1  |
| <i>circRHBDD1</i> | miR-4762-3p         | 7  |
| <i>circRHBDD1</i> | miR-4762-5p         | 1  |
| <i>circRHBDD1</i> | miR-4766-5p         | 2  |
| <i>circRHBDD1</i> | miR-4768-3p         | 6  |
| <i>circRHBDD1</i> | miR-4769-3p/6817-5p | 7  |
| <i>circRHBDD1</i> | miR-4774-5p         | 4  |
| <i>circRHBDD1</i> | miR-4777-5p         | 4  |
| <i>circRHBDD1</i> | miR-4778-3p         | 8  |
| <i>circRHBDD1</i> | miR-4781-3p         | 7  |
| <i>circRHBDD1</i> | miR-4789-5p         | 11 |
| <i>circRHBDD1</i> | miR-4792            | 1  |
| <i>circRHBDD1</i> | miR-4796-3p         | 6  |
| <i>circRHBDD1</i> | miR-4798-5p         | 1  |
| <i>circRHBDD1</i> | miR-4802-3p         | 6  |
| <i>circRHBDD1</i> | miR-4803            | 4  |
| <i>circRHBDD1</i> | miR-483-3p.1        | 3  |
| <i>circRHBDD1</i> | miR-483-3p.2        | 4  |
| <i>circRHBDD1</i> | miR-483-5p          | 5  |
| <i>circRHBDD1</i> | miR-488-5p          | 16 |
| <i>circRHBDD1</i> | miR-490-3p          | 1  |
| <i>circRHBDD1</i> | miR-490-5p          | 10 |
| <i>circRHBDD1</i> | miR-494-3p          | 7  |
| <i>circRHBDD1</i> | miR-495-3p          | 2  |
| <i>circRHBDD1</i> | miR-495-5p          | 6  |
| <i>circRHBDD1</i> | miR-497-3p          | 4  |
| <i>circRHBDD1</i> | miR-498             | 6  |
| <i>circRHBDD1</i> | miR-5006-5p         | 4  |
| <i>circRHBDD1</i> | miR-5011-3p         | 7  |
| <i>circRHBDD1</i> | miR-504-3p          | 10 |
| <i>circRHBDD1</i> | miR-508-5p          | 4  |
| <i>circRHBDD1</i> | miR-5095/7151-3p    | 1  |
| <i>circRHBDD1</i> | miR-510-3p          | 4  |
| <i>circRHBDD1</i> | miR-512-5p          | 10 |
| <i>circRHBDD1</i> | miR-514a-3p         | 1  |

|                   |                                               |    |
|-------------------|-----------------------------------------------|----|
| <i>circRHBDD1</i> | miR-515-5p/519e-5p                            | 4  |
| <i>circRHBDD1</i> | miR-5187-3p                                   | 2  |
| <i>circRHBDD1</i> | miR-518d-5p/519-5p                            | 4  |
| <i>circRHBDD1</i> | miR-5192                                      | 5  |
| <i>circRHBDD1</i> | miR-5197-3p                                   | 6  |
| <i>circRHBDD1</i> | miR-520g-3p                                   | 7  |
| <i>circRHBDD1</i> | miR-524-5p                                    | 5  |
| <i>circRHBDD1</i> | miR-525-5p                                    | 6  |
| <i>circRHBDD1</i> | miR-526b-5p                                   | 9  |
| <i>circRHBDD1</i> | miR-539-5p                                    | 8  |
| <i>circRHBDD1</i> | miR-542-3p                                    | 6  |
| <i>circRHBDD1</i> | miR-544b                                      | 2  |
| <i>circRHBDD1</i> | miR-545-5p                                    | 8  |
| <i>circRHBDD1</i> | miR-548ad-3p                                  | 7  |
| <i>circRHBDD1</i> | miR-548at-5p                                  | 6  |
| <i>circRHBDD1</i> | miR-548az-3p/548ar-3p/548a-3p/548e-3p/548f-3p | 2  |
| <i>circRHBDD1</i> | miR-548az-5p/548t-5p                          | 1  |
| <i>circRHBDD1</i> | miR-548b-3p                                   | 8  |
| <i>circRHBDD1</i> | miR-548c-3p                                   | 1  |
| <i>circRHBDD1</i> | miR-548n                                      | 1  |
| <i>circRHBDD1</i> | miR-548p                                      | 6  |
| <i>circRHBDD1</i> | miR-548q                                      | 1  |
| <i>circRHBDD1</i> | miR-548s                                      | 7  |
| <i>circRHBDD1</i> | miR-552-3p                                    | 6  |
| <i>circRHBDD1</i> | miR-5582-3p                                   | 2  |
| <i>circRHBDD1</i> | miR-5584-5p                                   | 11 |
| <i>circRHBDD1</i> | miR-5585-3p                                   | 2  |
| <i>circRHBDD1</i> | miR-5587-5p                                   | 7  |
| <i>circRHBDD1</i> | miR-5590-5p                                   | 6  |
| <i>circRHBDD1</i> | miR-561-3p                                    | 6  |
| <i>circRHBDD1</i> | miR-5681a                                     | 6  |
| <i>circRHBDD1</i> | miR-5681b                                     | 1  |
| <i>circRHBDD1</i> | miR-5693                                      | 6  |
| <i>circRHBDD1</i> | miR-570-3p                                    | 7  |
| <i>circRHBDD1</i> | miR-5701                                      | 6  |
| <i>circRHBDD1</i> | miR-573/3616-5p                               | 3  |
| <i>circRHBDD1</i> | miR-576-3p                                    | 6  |
| <i>circRHBDD1</i> | miR-578                                       | 4  |

|                   |                     |    |
|-------------------|---------------------|----|
| <i>circRHBDD1</i> | miR-580-3p          | 9  |
| <i>circRHBDD1</i> | miR-582-5p          | 6  |
| <i>circRHBDD1</i> | miR-588             | 7  |
| <i>circRHBDD1</i> | miR-598-5p          | 4  |
| <i>circRHBDD1</i> | miR-607             | 2  |
| <i>circRHBDD1</i> | miR-6077            | 6  |
| <i>circRHBDD1</i> | miR-6079            | 6  |
| <i>circRHBDD1</i> | miR-610             | 5  |
| <i>circRHBDD1</i> | miR-6124            | 8  |
| <i>circRHBDD1</i> | miR-6126            | 5  |
| <i>circRHBDD1</i> | miR-6131            | 4  |
| <i>circRHBDD1</i> | miR-6165            | 5  |
| <i>circRHBDD1</i> | miR-619-3p          | 1  |
| <i>circRHBDD1</i> | miR-622             | 9  |
| <i>circRHBDD1</i> | miR-629-3p          | 4  |
| <i>circRHBDD1</i> | miR-630             | 1  |
| <i>circRHBDD1</i> | miR-637             | 6  |
| <i>circRHBDD1</i> | miR-640             | 6  |
| <i>circRHBDD1</i> | miR-642a-5p         | 6  |
| <i>circRHBDD1</i> | miR-649             | 1  |
| <i>circRHBDD1</i> | miR-6501-3p         | 6  |
| <i>circRHBDD1</i> | miR-6505-5p         | 6  |
| <i>circRHBDD1</i> | miR-6507-3p         | 1  |
| <i>circRHBDD1</i> | miR-6508-3p         | 8  |
| <i>circRHBDD1</i> | miR-6510-5p         | 5  |
| <i>circRHBDD1</i> | miR-657             | 4  |
| <i>circRHBDD1</i> | miR-665             | 10 |
| <i>circRHBDD1</i> | miR-6715a-3p        | 4  |
| <i>circRHBDD1</i> | miR-6730-5p         | 6  |
| <i>circRHBDD1</i> | miR-6731-5p/8085    | 10 |
| <i>circRHBDD1</i> | miR-6734-5p         | 12 |
| <i>circRHBDD1</i> | miR-6736-3p         | 9  |
| <i>circRHBDD1</i> | miR-6740-3p         | 5  |
| <i>circRHBDD1</i> | miR-6750-5p/6822-5p | 11 |
| <i>circRHBDD1</i> | miR-6758-5p/6856-5p | 5  |
| <i>circRHBDD1</i> | miR-6761-5p         | 2  |
| <i>circRHBDD1</i> | miR-6777-3p         | 4  |
| <i>circRHBDD1</i> | miR-6778-3p         | 1  |

|                   |                     |    |
|-------------------|---------------------|----|
| <i>circRHBDD1</i> | miR-6783-5p         | 5  |
| <i>circRHBDD1</i> | miR-6787-3p         | 7  |
| <i>circRHBDD1</i> | miR-6791-3p/6829-3p | 1  |
| <i>circRHBDD1</i> | miR-6801-5p         | 7  |
| <i>circRHBDD1</i> | miR-6804-5p         | 6  |
| <i>circRHBDD1</i> | miR-6810-5p         | 6  |
| <i>circRHBDD1</i> | miR-6815-3p         | 6  |
| <i>circRHBDD1</i> | miR-6815-5p/6865-5p | 13 |
| <i>circRHBDD1</i> | miR-6819-3p/6877-3p | 2  |
| <i>circRHBDD1</i> | miR-6825-5p         | 10 |
| <i>circRHBDD1</i> | miR-6827-5p         | 8  |
| <i>circRHBDD1</i> | miR-6830-3p         | 5  |
| <i>circRHBDD1</i> | miR-6834-5p         | 12 |
| <i>circRHBDD1</i> | miR-6853-3p         | 3  |
| <i>circRHBDD1</i> | miR-6854-5p         | 7  |
| <i>circRHBDD1</i> | miR-6857-5p         | 6  |
| <i>circRHBDD1</i> | miR-6864-5p         | 5  |
| <i>circRHBDD1</i> | miR-6871-5p         | 7  |
| <i>circRHBDD1</i> | miR-6878-5p         | 10 |
| <i>circRHBDD1</i> | miR-6880-5p         | 6  |
| <i>circRHBDD1</i> | miR-6882-3p         | 6  |
| <i>circRHBDD1</i> | miR-6882-5p         | 1  |
| <i>circRHBDD1</i> | miR-6885-3p         | 5  |
| <i>circRHBDD1</i> | miR-6892-3p         | 6  |
| <i>circRHBDD1</i> | miR-6895-5p         | 8  |
| <i>circRHBDD1</i> | miR-7-3p            | 4  |
| <i>circRHBDD1</i> | miR-7-5p            | 6  |
| <i>circRHBDD1</i> | miR-7109-3p         | 2  |
| <i>circRHBDD1</i> | miR-7113-5p         | 1  |
| <i>circRHBDD1</i> | miR-7151-5p         | 3  |
| <i>circRHBDD1</i> | miR-7155-5p         | 6  |
| <i>circRHBDD1</i> | miR-7158-3p         | 5  |
| <i>circRHBDD1</i> | miR-7160-3p         | 8  |
| <i>circRHBDD1</i> | miR-7162-3p         | 6  |
| <i>circRHBDD1</i> | miR-7515            | 5  |
| <i>circRHBDD1</i> | miR-7641            | 10 |
| <i>circRHBDD1</i> | miR-766-3p          | 5  |
| <i>circRHBDD1</i> | miR-7851-3p         | 1  |

|                   |                          |    |
|-------------------|--------------------------|----|
| <i>circRHBDD1</i> | miR-7855-5p              | 5  |
| <i>circRHBDD1</i> | miR-7977                 | 9  |
| <i>circRHBDD1</i> | miR-7978                 | 1  |
| <i>circRHBDD1</i> | miR-802                  | 8  |
| <i>circRHBDD1</i> | miR-8055                 | 6  |
| <i>circRHBDD1</i> | miR-8063                 | 1  |
| <i>circRHBDD1</i> | miR-8071                 | 6  |
| <i>circRHBDD1</i> | miR-873-5p.1             | 1  |
| <i>circRHBDD1</i> | miR-873-5p.2             | 6  |
| <i>circRHBDD1</i> | miR-876-3p               | 7  |
| <i>circRHBDD1</i> | miR-939-5p/1343-5p       | 10 |
| <i>circRHBDD1</i> | miR-940/6808-5p/6893-5p  | 6  |
| <i>circRHBDD1</i> | miR-95-5p                | 1  |
| <i>circRHBDD1</i> | miR-9500                 | 11 |
| <i>circRHBDD1</i> | let-7a-2-3p/let-7g-3p    | 4  |
| <i>circRHBDD1</i> | let-7c-3p                | 4  |
| <i>circRHBDD1</i> | miR-100-3p               | 1  |
| <i>circRHBDD1</i> | miR-1225-5p              | 1  |
| <i>circRHBDD1</i> | miR-1228-3p              | 2  |
| <i>circRHBDD1</i> | miR-1229-5p              | 1  |
| <i>circRHBDD1</i> | miR-1236-3p              | 1  |
| <i>circRHBDD1</i> | miR-1238-3p              | 1  |
| <i>circRHBDD1</i> | miR-1238-5p/4758-5p      | 5  |
| <i>circRHBDD1</i> | miR-124-5p               | 1  |
| <i>circRHBDD1</i> | miR-1243                 | 1  |
| <i>circRHBDD1</i> | miR-1244                 | 1  |
| <i>circRHBDD1</i> | miR-1245a/8079           | 2  |
| <i>circRHBDD1</i> | miR-1249-5p/6797-5p      | 3  |
| <i>circRHBDD1</i> | miR-1251-3p              | 1  |
| <i>circRHBDD1</i> | miR-1252-5p              | 5  |
| <i>circRHBDD1</i> | miR-1258                 | 1  |
| <i>circRHBDD1</i> | miR-1262/4701-3p/6736-5p | 2  |
| <i>circRHBDD1</i> | miR-1267                 | 1  |
| <i>circRHBDD1</i> | miR-1270                 | 1  |
| <i>circRHBDD1</i> | miR-1284                 | 2  |
| <i>circRHBDD1</i> | miR-1288-3p              | 1  |
| <i>circRHBDD1</i> | miR-1291/6775-3p         | 3  |
| <i>circRHBDD1</i> | miR-130-3p/301-3p/454-3p | 1  |



|                   |                                      |   |
|-------------------|--------------------------------------|---|
| <i>circRHBDD1</i> | miR-1303                             | 1 |
| <i>circRHBDD1</i> | miR-1307-3p                          | 1 |
| <i>circRHBDD1</i> | miR-130b-5p                          | 2 |
| <i>circRHBDD1</i> | miR-1324                             | 1 |
| <i>circRHBDD1</i> | miR-1343-3p                          | 3 |
| <i>circRHBDD1</i> | miR-137                              | 1 |
| <i>circRHBDD1</i> | miR-140-3p.1                         | 1 |
| <i>circRHBDD1</i> | miR-140-3p.2                         | 2 |
| <i>circRHBDD1</i> | miR-141-5p                           | 1 |
| <i>circRHBDD1</i> | miR-145-3p                           | 3 |
| <i>circRHBDD1</i> | miR-146-5p                           | 1 |
| <i>circRHBDD1</i> | miR-1470                             | 1 |
| <i>circRHBDD1</i> | miR-148-3p/152-3p                    | 1 |
| <i>circRHBDD1</i> | miR-149-3p/4728-5p/6785-5p/6883-5p   | 1 |
| <i>circRHBDD1</i> | miR-149-5p                           | 3 |
| <i>circRHBDD1</i> | miR-15-5p/16-5p/195-5p/424-5p/497-5p | 1 |
| <i>circRHBDD1</i> | miR-1537-3p                          | 1 |
| <i>circRHBDD1</i> | miR-155-5p                           | 3 |
| <i>circRHBDD1</i> | miR-18-5p                            | 2 |
| <i>circRHBDD1</i> | miR-181-5p                           | 1 |
| <i>circRHBDD1</i> | miR-182-5p                           | 1 |
| <i>circRHBDD1</i> | miR-1825                             | 1 |
| <i>circRHBDD1</i> | miR-1827                             | 1 |
| <i>circRHBDD1</i> | miR-183-5p.2                         | 2 |
| <i>circRHBDD1</i> | miR-185-3p                           | 1 |
| <i>circRHBDD1</i> | miR-186-5p                           | 3 |
| <i>circRHBDD1</i> | miR-187-3p                           | 2 |
| <i>circRHBDD1</i> | miR-1910-5p                          | 2 |
| <i>circRHBDD1</i> | miR-1914-5p                          | 1 |
| <i>circRHBDD1</i> | miR-196b-3p                          | 1 |
| <i>circRHBDD1</i> | miR-199-3p                           | 1 |
| <i>circRHBDD1</i> | miR-199-5p                           | 1 |
| <i>circRHBDD1</i> | miR-202-5p                           | 1 |
| <i>circRHBDD1</i> | miR-203a-3p.1                        | 1 |
| <i>circRHBDD1</i> | miR-205-5p                           | 1 |
| <i>circRHBDD1</i> | miR-2054                             | 3 |
| <i>circRHBDD1</i> | miR-2113                             | 2 |
| <i>circRHBDD1</i> | miR-2114-5p                          | 1 |

|                   |                    |   |
|-------------------|--------------------|---|
| <i>circRHBDD1</i> | miR-2115-3p        | 1 |
| <i>circRHBDD1</i> | miR-2115-5p        | 5 |
| <i>circRHBDD1</i> | miR-2116-5p        | 2 |
| <i>circRHBDD1</i> | miR-214-3p/3619-5p | 2 |
| <i>circRHBDD1</i> | miR-219b-5p        | 1 |
| <i>circRHBDD1</i> | miR-22-3p          | 2 |
| <i>circRHBDD1</i> | miR-22-5p          | 2 |
| <i>circRHBDD1</i> | miR-2277-3p        | 1 |
| <i>circRHBDD1</i> | miR-23-3p          | 1 |
| <i>circRHBDD1</i> | miR-23-5p          | 1 |
| <i>circRHBDD1</i> | miR-2355-3p        | 1 |
| <i>circRHBDD1</i> | miR-2467-3p        | 1 |
| <i>circRHBDD1</i> | miR-2467-5p        | 3 |
| <i>circRHBDD1</i> | miR-2909           | 1 |
| <i>circRHBDD1</i> | miR-299-5p         | 1 |
| <i>circRHBDD1</i> | miR-29a-5p         | 4 |
| <i>circRHBDD1</i> | miR-29b-1-5p       | 2 |
| <i>circRHBDD1</i> | miR-302c-5p        | 2 |
| <i>circRHBDD1</i> | miR-3074-5p        | 3 |
| <i>circRHBDD1</i> | miR-3117-3p        | 1 |
| <i>circRHBDD1</i> | miR-3117-5p        | 1 |
| <i>circRHBDD1</i> | miR-3119           | 2 |
| <i>circRHBDD1</i> | miR-3120-5p        | 2 |
| <i>circRHBDD1</i> | miR-3121-5p        | 2 |
| <i>circRHBDD1</i> | miR-3126-5p        | 3 |
| <i>circRHBDD1</i> | miR-3130-3p        | 5 |
| <i>circRHBDD1</i> | miR-3133           | 3 |
| <i>circRHBDD1</i> | miR-3140-5p        | 1 |
| <i>circRHBDD1</i> | miR-3144-5p        | 1 |
| <i>circRHBDD1</i> | miR-3151-3p        | 1 |
| <i>circRHBDD1</i> | miR-3152-3p        | 1 |
| <i>circRHBDD1</i> | miR-3152-5p        | 1 |
| <i>circRHBDD1</i> | miR-3154           | 2 |
| <i>circRHBDD1</i> | miR-3160-3p        | 5 |
| <i>circRHBDD1</i> | miR-3160-5p        | 1 |
| <i>circRHBDD1</i> | miR-3162-3p        | 2 |
| <i>circRHBDD1</i> | miR-3162-5p        | 1 |
| <i>circRHBDD1</i> | miR-3169           | 2 |

|                   |                     |   |
|-------------------|---------------------|---|
| <i>circRHBDD1</i> | miR-3170/6855-5p    | 2 |
| <i>circRHBDD1</i> | miR-3176/3922-3p    | 2 |
| <i>circRHBDD1</i> | miR-3177-3p         | 1 |
| <i>circRHBDD1</i> | miR-3177-5p         | 5 |
| <i>circRHBDD1</i> | miR-3188            | 3 |
| <i>circRHBDD1</i> | miR-3190-5p         | 2 |
| <i>circRHBDD1</i> | miR-3191-3p         | 1 |
| <i>circRHBDD1</i> | miR-3191-5p         | 1 |
| <i>circRHBDD1</i> | miR-3193            | 2 |
| <i>circRHBDD1</i> | miR-3199/8052       | 1 |
| <i>circRHBDD1</i> | miR-32-3p           | 1 |
| <i>circRHBDD1</i> | miR-3202            | 2 |
| <i>circRHBDD1</i> | miR-320e            | 1 |
| <i>circRHBDD1</i> | miR-323-3p          | 4 |
| <i>circRHBDD1</i> | miR-326             | 1 |
| <i>circRHBDD1</i> | miR-33-5p           | 1 |
| <i>circRHBDD1</i> | miR-34-5p/449-5p    | 1 |
| <i>circRHBDD1</i> | miR-345-3p          | 1 |
| <i>circRHBDD1</i> | miR-3606-5p         | 2 |
| <i>circRHBDD1</i> | miR-3612            | 1 |
| <i>circRHBDD1</i> | miR-3615            | 2 |
| <i>circRHBDD1</i> | miR-3618            | 1 |
| <i>circRHBDD1</i> | miR-3652/4430       | 2 |
| <i>circRHBDD1</i> | miR-3654            | 1 |
| <i>circRHBDD1</i> | miR-3655            | 1 |
| <i>circRHBDD1</i> | miR-3657            | 1 |
| <i>circRHBDD1</i> | miR-3659            | 5 |
| <i>circRHBDD1</i> | miR-365a-5p/365b-5p | 1 |
| <i>circRHBDD1</i> | miR-3664-5p         | 1 |
| <i>circRHBDD1</i> | miR-3667-3p         | 2 |
| <i>circRHBDD1</i> | miR-367-5p          | 1 |
| <i>circRHBDD1</i> | miR-3675-5p         | 1 |
| <i>circRHBDD1</i> | miR-3685            | 1 |
| <i>circRHBDD1</i> | miR-3686            | 2 |
| <i>circRHBDD1</i> | miR-369-3p          | 2 |
| <i>circRHBDD1</i> | miR-3692-3p         | 1 |
| <i>circRHBDD1</i> | miR-3692-5p         | 6 |
| <i>circRHBDD1</i> | miR-370-3p          | 2 |

|                   |                                    |   |
|-------------------|------------------------------------|---|
| <i>circRHBDD1</i> | miR-371-5p                         | 1 |
| <i>circRHBDD1</i> | miR-371b-5p/373-5p/616-5p          | 1 |
| <i>circRHBDD1</i> | miR-372-5p                         | 1 |
| <i>circRHBDD1</i> | miR-375                            | 2 |
| <i>circRHBDD1</i> | miR-376-3p                         | 4 |
| <i>circRHBDD1</i> | miR-384                            | 1 |
| <i>circRHBDD1</i> | miR-3907                           | 2 |
| <i>circRHBDD1</i> | miR-3919                           | 1 |
| <i>circRHBDD1</i> | miR-3920                           | 1 |
| <i>circRHBDD1</i> | miR-3928-3p                        | 1 |
| <i>circRHBDD1</i> | miR-3929/4419b/4478                | 2 |
| <i>circRHBDD1</i> | miR-3942-3p                        | 5 |
| <i>circRHBDD1</i> | miR-3975                           | 3 |
| <i>circRHBDD1</i> | miR-3977                           | 7 |
| <i>circRHBDD1</i> | miR-412-3p/6754-3p                 | 3 |
| <i>circRHBDD1</i> | miR-4255                           | 2 |
| <i>circRHBDD1</i> | miR-4257                           | 6 |
| <i>circRHBDD1</i> | miR-4260                           | 1 |
| <i>circRHBDD1</i> | miR-4264                           | 3 |
| <i>circRHBDD1</i> | miR-4266                           | 3 |
| <i>circRHBDD1</i> | miR-4269/6715b-5p                  | 1 |
| <i>circRHBDD1</i> | miR-4273/7156-5p                   | 4 |
| <i>circRHBDD1</i> | miR-4278                           | 1 |
| <i>circRHBDD1</i> | miR-4280                           | 3 |
| <i>circRHBDD1</i> | miR-4281                           | 2 |
| <i>circRHBDD1</i> | miR-4287/4685-3p                   | 1 |
| <i>circRHBDD1</i> | miR-4292/6791-5p                   | 1 |
| <i>circRHBDD1</i> | miR-4308                           | 1 |
| <i>circRHBDD1</i> | miR-4326                           | 4 |
| <i>circRHBDD1</i> | miR-4419a/4510/6127/6129/6130/6133 | 3 |
| <i>circRHBDD1</i> | miR-4433a-5p                       | 2 |
| <i>circRHBDD1</i> | miR-4433b-5p                       | 1 |
| <i>circRHBDD1</i> | miR-4434/4516/5703                 | 1 |
| <i>circRHBDD1</i> | miR-4438                           | 1 |
| <i>circRHBDD1</i> | miR-4443                           | 1 |
| <i>circRHBDD1</i> | miR-4469                           | 1 |
| <i>circRHBDD1</i> | miR-4474-5p                        | 1 |
| <i>circRHBDD1</i> | miR-4476/6876-5p                   | 3 |

|                   |                       |    |
|-------------------|-----------------------|----|
| <i>circRHBDD1</i> | miR-4477a             | 1  |
| <i>circRHBDD1</i> | miR-4477b             | 1  |
| <i>circRHBDD1</i> | miR-4480              | 1  |
| <i>circRHBDD1</i> | miR-4485-5p           | 1  |
| <i>circRHBDD1</i> | miR-4487              | 5  |
| <i>circRHBDD1</i> | miR-4493              | 1  |
| <i>circRHBDD1</i> | miR-4505/5787         | 2  |
| <i>circRHBDD1</i> | miR-450a-2-3p         | 1  |
| <i>circRHBDD1</i> | miR-4514/4692         | 1  |
| <i>circRHBDD1</i> | miR-4515              | 1  |
| <i>circRHBDD1</i> | miR-4524a-3p          | 2  |
| <i>circRHBDD1</i> | miR-4524b-3p          | 1  |
| <i>circRHBDD1</i> | miR-4531              | 1  |
| <i>circRHBDD1</i> | miR-4533              | 2  |
| <i>circRHBDD1</i> | miR-4540              | 3  |
| <i>circRHBDD1</i> | miR-455-3p.1          | 2  |
| <i>circRHBDD1</i> | miR-4638-5p           | 1  |
| <i>circRHBDD1</i> | miR-4639-3p           | 2  |
| <i>circRHBDD1</i> | miR-4646-3p           | 1  |
| <i>circRHBDD1</i> | miR-4652-3p           | 3  |
| <i>circRHBDD1</i> | miR-4652-5p           | 1  |
| <i>circRHBDD1</i> | miR-4658/6790-5p      | 5  |
| <i>circRHBDD1</i> | miR-4659a-3p/4659b-3p | 10 |
| <i>circRHBDD1</i> | miR-4660              | 1  |
| <i>circRHBDD1</i> | miR-4667-3p           | 1  |
| <i>circRHBDD1</i> | miR-4669              | 1  |
| <i>circRHBDD1</i> | miR-4670-3p           | 1  |
| <i>circRHBDD1</i> | miR-4677-5p           | 4  |
| <i>circRHBDD1</i> | miR-4680-5p           | 1  |
| <i>circRHBDD1</i> | miR-4686              | 2  |
| <i>circRHBDD1</i> | miR-4691-3p           | 3  |
| <i>circRHBDD1</i> | miR-4691-5p/6792-3p   | 1  |
| <i>circRHBDD1</i> | miR-4694-3p           | 1  |
| <i>circRHBDD1</i> | miR-4694-5p           | 2  |
| <i>circRHBDD1</i> | miR-4695-5p           | 3  |
| <i>circRHBDD1</i> | miR-4704-3p           | 1  |
| <i>circRHBDD1</i> | miR-4711-5p           | 3  |
| <i>circRHBDD1</i> | miR-4712-3p           | 1  |

|                   |                     |   |
|-------------------|---------------------|---|
| <i>circRHBDD1</i> | miR-4714-5p         | 1 |
| <i>circRHBDD1</i> | miR-4717-3p         | 6 |
| <i>circRHBDD1</i> | miR-4722-3p/6727-3p | 3 |
| <i>circRHBDD1</i> | miR-4725-5p         | 3 |
| <i>circRHBDD1</i> | miR-4728-3p         | 1 |
| <i>circRHBDD1</i> | miR-4731-5p         | 2 |
| <i>circRHBDD1</i> | miR-4738-3p         | 1 |
| <i>circRHBDD1</i> | miR-4738-5p         | 3 |
| <i>circRHBDD1</i> | miR-4739            | 1 |
| <i>circRHBDD1</i> | miR-4740-5p         | 1 |
| <i>circRHBDD1</i> | miR-4742-5p         | 1 |
| <i>circRHBDD1</i> | miR-4743-3p         | 3 |
| <i>circRHBDD1</i> | miR-4746-5p         | 2 |
| <i>circRHBDD1</i> | miR-4747-3p         | 3 |
| <i>circRHBDD1</i> | miR-4747-5p/5196-5p | 2 |
| <i>circRHBDD1</i> | miR-4754            | 2 |
| <i>circRHBDD1</i> | miR-4756-3p         | 1 |
| <i>circRHBDD1</i> | miR-4759            | 2 |
| <i>circRHBDD1</i> | miR-4763-5p         | 5 |
| <i>circRHBDD1</i> | miR-4774-3p         | 1 |
| <i>circRHBDD1</i> | miR-4778-5p         | 2 |
| <i>circRHBDD1</i> | miR-4779            | 3 |
| <i>circRHBDD1</i> | miR-4780            | 3 |
| <i>circRHBDD1</i> | miR-4786-5p         | 2 |
| <i>circRHBDD1</i> | miR-4793-3p         | 5 |
| <i>circRHBDD1</i> | miR-4793-5p         | 1 |
| <i>circRHBDD1</i> | miR-4797-3p         | 3 |
| <i>circRHBDD1</i> | miR-4802-5p         | 1 |
| <i>circRHBDD1</i> | miR-485-5p          | 3 |
| <i>circRHBDD1</i> | miR-493-3p          | 1 |
| <i>circRHBDD1</i> | miR-493-5p          | 4 |
| <i>circRHBDD1</i> | miR-5002-5p         | 1 |
| <i>circRHBDD1</i> | miR-5008-5p         | 3 |
| <i>circRHBDD1</i> | miR-500a-5p         | 2 |
| <i>circRHBDD1</i> | miR-5010-3p         | 2 |
| <i>circRHBDD1</i> | miR-503-5p          | 1 |
| <i>circRHBDD1</i> | miR-5088-3p         | 1 |
| <i>circRHBDD1</i> | miR-511-5p          | 1 |

|                   |                                                                  |   |
|-------------------|------------------------------------------------------------------|---|
| <i>circRHBDD1</i> | miR-514a-5p                                                      | 1 |
| <i>circRHBDD1</i> | miR-516a-3p/516b-3p/7162-5p                                      | 5 |
| <i>circRHBDD1</i> | miR-516a-5p                                                      | 2 |
| <i>circRHBDD1</i> | miR-518c-5p                                                      | 1 |
| <i>circRHBDD1</i> | miR-5193                                                         | 1 |
| <i>circRHBDD1</i> | miR-5196-3p                                                      | 1 |
| <i>circRHBDD1</i> | miR-522-3p                                                       | 1 |
| <i>circRHBDD1</i> | miR-544a                                                         | 2 |
| <i>circRHBDD1</i> | miR-548ac/548bb-3p/548d-3p/548h-3p/548z                          | 1 |
| <i>circRHBDD1</i> | miR-548ap-3p/548aa/548t-3p                                       | 1 |
| <i>circRHBDD1</i> | miR-548aq-3p/548am-3p/548aj-3p/548ah-3p/548ae-3p/548j-3p/548x-3p | 1 |
| <i>circRHBDD1</i> | miR-548as-3p                                                     | 1 |
| <i>circRHBDD1</i> | miR-548au-3p                                                     | 1 |
| <i>circRHBDD1</i> | miR-548av-5p/548k/8054                                           | 2 |
| <i>circRHBDD1</i> | miR-548ay-3p/548at-3p                                            | 1 |
| <i>circRHBDD1</i> | miR-548ay-5p/548au-5p/548as-5p/548ar-3p/548aq-5p/548ap-5p/548am- | 2 |
| <i>circRHBDD1</i> | miR-548l                                                         | 2 |
| <i>circRHBDD1</i> | miR-548m                                                         | 1 |
| <i>circRHBDD1</i> | miR-555                                                          | 1 |
| <i>circRHBDD1</i> | miR-5571-3p                                                      | 3 |
| <i>circRHBDD1</i> | miR-5571-5p                                                      | 2 |
| <i>circRHBDD1</i> | miR-5572                                                         | 1 |
| <i>circRHBDD1</i> | miR-558                                                          | 5 |
| <i>circRHBDD1</i> | miR-5580-5p                                                      | 2 |
| <i>circRHBDD1</i> | miR-5581-3p                                                      | 5 |
| <i>circRHBDD1</i> | miR-5586-5p                                                      | 2 |
| <i>circRHBDD1</i> | miR-5588-3p                                                      | 1 |
| <i>circRHBDD1</i> | miR-5589-3p                                                      | 4 |
| <i>circRHBDD1</i> | miR-5589-5p                                                      | 2 |
| <i>circRHBDD1</i> | miR-562                                                          | 1 |
| <i>circRHBDD1</i> | miR-564                                                          | 1 |
| <i>circRHBDD1</i> | miR-5691                                                         | 2 |
| <i>circRHBDD1</i> | miR-5692bc                                                       | 2 |
| <i>circRHBDD1</i> | miR-574-5p                                                       | 5 |
| <i>circRHBDD1</i> | miR-575/4676-5p                                                  | 3 |
| <i>circRHBDD1</i> | miR-587                                                          | 5 |
| <i>circRHBDD1</i> | miR-589-5p                                                       | 1 |
| <i>circRHBDD1</i> | miR-593-3p                                                       | 1 |

|                   |                             |   |
|-------------------|-----------------------------|---|
| <i>circRHBDD1</i> | miR-597-5p                  | 2 |
| <i>circRHBDD1</i> | miR-605-3p                  | 1 |
| <i>circRHBDD1</i> | miR-6071                    | 2 |
| <i>circRHBDD1</i> | miR-6078                    | 1 |
| <i>circRHBDD1</i> | miR-6089                    | 3 |
| <i>circRHBDD1</i> | miR-617                     | 1 |
| <i>circRHBDD1</i> | miR-624-5p                  | 1 |
| <i>circRHBDD1</i> | miR-628-5p                  | 2 |
| <i>circRHBDD1</i> | miR-635/6774-5p             | 1 |
| <i>circRHBDD1</i> | miR-636                     | 2 |
| <i>circRHBDD1</i> | miR-643                     | 2 |
| <i>circRHBDD1</i> | miR-646                     | 1 |
| <i>circRHBDD1</i> | miR-6505-3p                 | 1 |
| <i>circRHBDD1</i> | miR-6507-5p                 | 4 |
| <i>circRHBDD1</i> | miR-651-3p                  | 3 |
| <i>circRHBDD1</i> | miR-651-5p                  | 1 |
| <i>circRHBDD1</i> | miR-6514-3p                 | 3 |
| <i>circRHBDD1</i> | miR-6514-5p                 | 1 |
| <i>circRHBDD1</i> | miR-6515-3p                 | 1 |
| <i>circRHBDD1</i> | miR-6515-5p                 | 1 |
| <i>circRHBDD1</i> | miR-654-3p                  | 1 |
| <i>circRHBDD1</i> | miR-656-3p                  | 1 |
| <i>circRHBDD1</i> | miR-656-5p                  | 2 |
| <i>circRHBDD1</i> | miR-660-3p                  | 1 |
| <i>circRHBDD1</i> | miR-664a-5p/4794            | 3 |
| <i>circRHBDD1</i> | miR-670-3p                  | 1 |
| <i>circRHBDD1</i> | miR-670-5p                  | 1 |
| <i>circRHBDD1</i> | miR-6716-5p                 | 2 |
| <i>circRHBDD1</i> | miR-6723-5p                 | 3 |
| <i>circRHBDD1</i> | miR-6734-3p                 | 2 |
| <i>circRHBDD1</i> | miR-6735-3p                 | 2 |
| <i>circRHBDD1</i> | miR-6737-5p/6812-5p/6819-5p | 2 |
| <i>circRHBDD1</i> | miR-6738-3p                 | 2 |
| <i>circRHBDD1</i> | miR-6739-3p                 | 2 |
| <i>circRHBDD1</i> | miR-6741-5p                 | 2 |
| <i>circRHBDD1</i> | miR-6742-3p                 | 3 |
| <i>circRHBDD1</i> | miR-6747-3p                 | 3 |
| <i>circRHBDD1</i> | miR-6749-3p                 | 1 |



|                   |                     |    |
|-------------------|---------------------|----|
| <i>circRHBDD1</i> | miR-6755-3p         | 1  |
| <i>circRHBDD1</i> | miR-6757-3p         | 1  |
| <i>circRHBDD1</i> | miR-6758-3p         | 1  |
| <i>circRHBDD1</i> | miR-676-3p          | 1  |
| <i>circRHBDD1</i> | miR-676-5p          | 8  |
| <i>circRHBDD1</i> | miR-6760-5p         | 1  |
| <i>circRHBDD1</i> | miR-6764-3p/6824-3p | 1  |
| <i>circRHBDD1</i> | miR-6774-3p         | 2  |
| <i>circRHBDD1</i> | miR-6776-3p         | 2  |
| <i>circRHBDD1</i> | miR-6776-5p         | 4  |
| <i>circRHBDD1</i> | miR-6780a-3p        | 1  |
| <i>circRHBDD1</i> | miR-6780b-3p        | 3  |
| <i>circRHBDD1</i> | miR-6789-5p         | 1  |
| <i>circRHBDD1</i> | miR-6794-3p         | 3  |
| <i>circRHBDD1</i> | miR-6799-5p         | 1  |
| <i>circRHBDD1</i> | miR-6817-3p         | 2  |
| <i>circRHBDD1</i> | miR-6818-3p         | 1  |
| <i>circRHBDD1</i> | miR-6823-5p         | 1  |
| <i>circRHBDD1</i> | miR-6824-5p         | 1  |
| <i>circRHBDD1</i> | miR-6828-3p         | 2  |
| <i>circRHBDD1</i> | miR-6832-3p         | 2  |
| <i>circRHBDD1</i> | miR-6837-3p         | 3  |
| <i>circRHBDD1</i> | miR-6838-3p         | 4  |
| <i>circRHBDD1</i> | miR-6844            | 2  |
| <i>circRHBDD1</i> | miR-6847-5p         | 6  |
| <i>circRHBDD1</i> | miR-6849-3p         | 3  |
| <i>circRHBDD1</i> | miR-6850-5p         | 2  |
| <i>circRHBDD1</i> | miR-6851-3p         | 3  |
| <i>circRHBDD1</i> | miR-6852-5p         | 3  |
| <i>circRHBDD1</i> | miR-6858-3p         | 3  |
| <i>circRHBDD1</i> | miR-6861-5p         | 4  |
| <i>circRHBDD1</i> | miR-6865-3p         | 1  |
| <i>circRHBDD1</i> | miR-6868-3p         | 1  |
| <i>circRHBDD1</i> | miR-6872-3p         | 2  |
| <i>circRHBDD1</i> | miR-6873-3p         | 2  |
| <i>circRHBDD1</i> | miR-6873-5p         | 1  |
| <i>circRHBDD1</i> | miR-6875-3p         | 10 |
| <i>circRHBDD1</i> | miR-6878-3p         | 2  |

|                   |             |   |
|-------------------|-------------|---|
| <i>circRHBDD1</i> | miR-6881-3p | 1 |
| <i>circRHBDD1</i> | miR-6883-3p | 2 |
| <i>circRHBDD1</i> | miR-6886-3p | 3 |
| <i>circRHBDD1</i> | miR-6888-3p | 1 |
| <i>circRHBDD1</i> | miR-6888-5p | 3 |
| <i>circRHBDD1</i> | miR-6890-5p | 1 |
| <i>circRHBDD1</i> | miR-6894-3p | 3 |
| <i>circRHBDD1</i> | miR-6894-5p | 1 |
| <i>circRHBDD1</i> | miR-6895-3p | 1 |
| <i>circRHBDD1</i> | miR-7106-5p | 1 |
| <i>circRHBDD1</i> | miR-7110-3p | 2 |
| <i>circRHBDD1</i> | miR-7111-3p | 1 |
| <i>circRHBDD1</i> | miR-7112-3p | 3 |
| <i>circRHBDD1</i> | miR-7113-3p | 1 |
| <i>circRHBDD1</i> | miR-7152-5p | 3 |
| <i>circRHBDD1</i> | miR-7154-3p | 1 |
| <i>circRHBDD1</i> | miR-758-3p  | 2 |
| <i>circRHBDD1</i> | miR-765     | 1 |
| <i>circRHBDD1</i> | miR-766-5p  | 1 |
| <i>circRHBDD1</i> | miR-769-5p  | 2 |
| <i>circRHBDD1</i> | miR-7848-3p | 1 |
| <i>circRHBDD1</i> | miR-7973    | 1 |
| <i>circRHBDD1</i> | miR-7975    | 3 |
| <i>circRHBDD1</i> | miR-8060    | 1 |
| <i>circRHBDD1</i> | miR-8062    | 2 |
| <i>circRHBDD1</i> | miR-8065    | 1 |
| <i>circRHBDD1</i> | miR-8068    | 2 |
| <i>circRHBDD1</i> | miR-8075    | 2 |
| <i>circRHBDD1</i> | miR-8081    | 3 |
| <i>circRHBDD1</i> | miR-8083    | 2 |
| <i>circRHBDD1</i> | miR-8088    | 2 |
| <i>circRHBDD1</i> | miR-890     | 1 |
| <i>circRHBDD1</i> | miR-921     | 2 |
| <i>circRHBDD1</i> | miR-922     | 2 |
| <i>circRHBDD1</i> | miR-93-3p   | 6 |
| <i>circRHBDD1</i> | miR-934     | 1 |
| <i>circRHBDD1</i> | miR-936     | 1 |
| <i>circRHBDD1</i> | miR-938     | 3 |

|                   |                             |   |
|-------------------|-----------------------------|---|
| <i>circRHBDD1</i> | miR-939-3p                  | 3 |
| <i>circRHBDD1</i> | miR-96-5p/1271-5p           | 1 |
| <i>circRHBDD1</i> | let-7-5p/98-5p              | 1 |
| <i>circRHBDD1</i> | miR-128-3p                  | 2 |
| <i>circRHBDD1</i> | miR-1283                    | 1 |
| <i>circRHBDD1</i> | miR-155-3p                  | 1 |
| <i>circRHBDD1</i> | miR-183-5p.1                | 1 |
| <i>circRHBDD1</i> | miR-204-3p/4646-5p          | 1 |
| <i>circRHBDD1</i> | miR-21-5p/590-5p            | 1 |
| <i>circRHBDD1</i> | miR-221-3p/222-3p           | 1 |
| <i>circRHBDD1</i> | miR-26-5p                   | 1 |
| <i>circRHBDD1</i> | miR-302b-5p/302d-5p         | 3 |
| <i>circRHBDD1</i> | miR-3121-3p                 | 1 |
| <i>circRHBDD1</i> | miR-3128                    | 1 |
| <i>circRHBDD1</i> | miR-3141                    | 1 |
| <i>circRHBDD1</i> | miR-3163                    | 1 |
| <i>circRHBDD1</i> | miR-3178                    | 1 |
| <i>circRHBDD1</i> | miR-3192-5p                 | 1 |
| <i>circRHBDD1</i> | miR-335-3p                  | 2 |
| <i>circRHBDD1</i> | miR-338-5p                  | 1 |
| <i>circRHBDD1</i> | miR-340-5p                  | 1 |
| <i>circRHBDD1</i> | miR-362-5p/500b-5p          | 1 |
| <i>circRHBDD1</i> | miR-377-3p                  | 1 |
| <i>circRHBDD1</i> | miR-3941                    | 1 |
| <i>circRHBDD1</i> | miR-4263                    | 1 |
| <i>circRHBDD1</i> | miR-4432                    | 1 |
| <i>circRHBDD1</i> | miR-4494                    | 1 |
| <i>circRHBDD1</i> | miR-4517                    | 1 |
| <i>circRHBDD1</i> | miR-452-3p                  | 1 |
| <i>circRHBDD1</i> | miR-452-5p/892-3p           | 1 |
| <i>circRHBDD1</i> | miR-4642                    | 1 |
| <i>circRHBDD1</i> | miR-4672                    | 1 |
| <i>circRHBDD1</i> | miR-4720-5p/4799-3p/5588-5p | 1 |
| <i>circRHBDD1</i> | miR-4724-3p                 | 1 |
| <i>circRHBDD1</i> | miR-4724-5p                 | 1 |
| <i>circRHBDD1</i> | miR-4775                    | 1 |
| <i>circRHBDD1</i> | miR-4777-3p                 | 1 |
| <i>circRHBDD1</i> | miR-499b-5p                 | 1 |

|                   |                             |   |
|-------------------|-----------------------------|---|
| <i>circRHBDD1</i> | miR-5000-3p                 | 1 |
| <i>circRHBDD1</i> | miR-501-5p                  | 1 |
| <i>circRHBDD1</i> | miR-5089-3p                 | 1 |
| <i>circRHBDD1</i> | miR-513a-3p/513c-3p/3606-3p | 1 |
| <i>circRHBDD1</i> | miR-513b-5p                 | 1 |
| <i>circRHBDD1</i> | miR-548v                    | 1 |
| <i>circRHBDD1</i> | miR-552-5p                  | 1 |
| <i>circRHBDD1</i> | miR-5579-3p                 | 1 |
| <i>circRHBDD1</i> | miR-5580-3p                 | 1 |
| <i>circRHBDD1</i> | miR-5583-3p                 | 1 |
| <i>circRHBDD1</i> | miR-5692a                   | 1 |
| <i>circRHBDD1</i> | miR-5697                    | 1 |
| <i>circRHBDD1</i> | miR-576-5p                  | 1 |
| <i>circRHBDD1</i> | miR-590-3p                  | 1 |
| <i>circRHBDD1</i> | miR-593-5p                  | 1 |
| <i>circRHBDD1</i> | miR-619-5p/6506-5p          | 1 |
| <i>circRHBDD1</i> | miR-625-3p                  | 1 |
| <i>circRHBDD1</i> | miR-6503-3p                 | 1 |
| <i>circRHBDD1</i> | miR-6509-5p                 | 1 |
| <i>circRHBDD1</i> | miR-6722-5p                 | 1 |
| <i>circRHBDD1</i> | miR-6768-5p                 | 2 |
| <i>circRHBDD1</i> | miR-6804-3p                 | 1 |
| <i>circRHBDD1</i> | miR-6868-5p                 | 1 |
| <i>circRHBDD1</i> | miR-7705                    | 1 |
| <i>circRHBDD1</i> | miR-7856-5p                 | 1 |
| <i>circRHBDD1</i> | miR-8064                    | 1 |
| <i>circRHBDD1</i> | miR-8074                    | 1 |
| <i>circRHBDD1</i> | miR-8076                    | 1 |
| <i>circRHBDD1</i> | miR-8087                    | 1 |
| <i>circRHBDD1</i> | miR-875-5p                  | 1 |
| <i>circRHBDD1</i> | miR-1264                    | 1 |
| <i>circRHBDD1</i> | miR-3184-3p                 | 1 |
| <i>circRIMS1</i>  | let-7-5p/98-5p              | 1 |
| <i>circRIMS1</i>  | let-7a-2-3p/let-7g-3p       | 2 |
| <i>circRIMS1</i>  | let-7c-3p                   | 2 |
| <i>circRIMS1</i>  | miR-101-5p                  | 1 |
| <i>circRIMS1</i>  | miR-1185-5p                 | 1 |
| <i>circRIMS1</i>  | miR-1206                    | 1 |

|                  |                      |   |
|------------------|----------------------|---|
| <i>circRIMS1</i> | miR-1207-3p          | 3 |
| <i>circRIMS1</i> | miR-1224-5p          | 1 |
| <i>circRIMS1</i> | miR-1231             | 4 |
| <i>circRIMS1</i> | miR-1250-3p          | 3 |
| <i>circRIMS1</i> | miR-1251-5p          | 1 |
| <i>circRIMS1</i> | miR-1257             | 1 |
| <i>circRIMS1</i> | miR-1260a/1260b      | 2 |
| <i>circRIMS1</i> | miR-1267             | 1 |
| <i>circRIMS1</i> | miR-1273e            | 2 |
| <i>circRIMS1</i> | miR-1273h-3p         | 1 |
| <i>circRIMS1</i> | miR-128-3p           | 1 |
| <i>circRIMS1</i> | miR-1282             | 1 |
| <i>circRIMS1</i> | miR-1287-3p          | 1 |
| <i>circRIMS1</i> | miR-129-5p           | 1 |
| <i>circRIMS1</i> | miR-1290             | 2 |
| <i>circRIMS1</i> | miR-1298-3p          | 2 |
| <i>circRIMS1</i> | miR-1299             | 2 |
| <i>circRIMS1</i> | miR-1306-3p          | 2 |
| <i>circRIMS1</i> | miR-133a-3p.1        | 2 |
| <i>circRIMS1</i> | miR-133a-3p.2/133b   | 2 |
| <i>circRIMS1</i> | miR-133a-5p          | 2 |
| <i>circRIMS1</i> | miR-135-5p           | 1 |
| <i>circRIMS1</i> | miR-135a-3p          | 2 |
| <i>circRIMS1</i> | miR-136-5p           | 1 |
| <i>circRIMS1</i> | miR-138-5p           | 2 |
| <i>circRIMS1</i> | miR-142-3p.1         | 1 |
| <i>circRIMS1</i> | miR-151-5p           | 2 |
| <i>circRIMS1</i> | miR-152-5p           | 1 |
| <i>circRIMS1</i> | miR-18-5p            | 1 |
| <i>circRIMS1</i> | miR-181-5p           | 1 |
| <i>circRIMS1</i> | miR-182-3p           | 1 |
| <i>circRIMS1</i> | miR-182-5p           | 4 |
| <i>circRIMS1</i> | miR-1827             | 1 |
| <i>circRIMS1</i> | miR-188-3p           | 2 |
| <i>circRIMS1</i> | miR-19-5p            | 1 |
| <i>circRIMS1</i> | miR-1910-3p/6511a-5p | 1 |
| <i>circRIMS1</i> | miR-196-5p           | 2 |
| <i>circRIMS1</i> | miR-2052             | 1 |

|                  |                    |   |
|------------------|--------------------|---|
| <i>circRIMS1</i> | miR-208-5p         | 2 |
| <i>circRIMS1</i> | miR-2117           | 1 |
| <i>circRIMS1</i> | miR-212-5p         | 1 |
| <i>circRIMS1</i> | miR-216a-5p        | 1 |
| <i>circRIMS1</i> | miR-216b-5p        | 1 |
| <i>circRIMS1</i> | miR-218-1-3p       | 1 |
| <i>circRIMS1</i> | miR-218-2-3p       | 1 |
| <i>circRIMS1</i> | miR-2467-3p        | 2 |
| <i>circRIMS1</i> | miR-2681-3p        | 1 |
| <i>circRIMS1</i> | miR-2681-5p        | 3 |
| <i>circRIMS1</i> | miR-27b-5p         | 1 |
| <i>circRIMS1</i> | miR-298            | 2 |
| <i>circRIMS1</i> | miR-3120-5p        | 2 |
| <i>circRIMS1</i> | miR-3126-3p        | 2 |
| <i>circRIMS1</i> | miR-3140-3p        | 1 |
| <i>circRIMS1</i> | miR-3143           | 1 |
| <i>circRIMS1</i> | miR-3144-3p        | 1 |
| <i>circRIMS1</i> | miR-3156-3p        | 2 |
| <i>circRIMS1</i> | miR-3160-5p        | 1 |
| <i>circRIMS1</i> | miR-3162-5p        | 2 |
| <i>circRIMS1</i> | miR-3171           | 1 |
| <i>circRIMS1</i> | miR-3185           | 2 |
| <i>circRIMS1</i> | miR-3189-3p        | 1 |
| <i>circRIMS1</i> | miR-325            | 1 |
| <i>circRIMS1</i> | miR-34a-3p         | 1 |
| <i>circRIMS1</i> | miR-34b-3p         | 2 |
| <i>circRIMS1</i> | miR-34b-5p/449c-5p | 1 |
| <i>circRIMS1</i> | miR-34c-3p         | 2 |
| <i>circRIMS1</i> | miR-3605-5p        | 1 |
| <i>circRIMS1</i> | miR-3606-5p        | 1 |
| <i>circRIMS1</i> | miR-3607-5p        | 2 |
| <i>circRIMS1</i> | miR-3611           | 1 |
| <i>circRIMS1</i> | miR-3617-3p        | 1 |
| <i>circRIMS1</i> | miR-3622b-5p       | 1 |
| <i>circRIMS1</i> | miR-3657           | 1 |
| <i>circRIMS1</i> | miR-3665           | 1 |
| <i>circRIMS1</i> | miR-367-5p         | 1 |
| <i>circRIMS1</i> | miR-3674           | 1 |

|                  |                       |   |
|------------------|-----------------------|---|
| <i>circRIMS1</i> | miR-3675-3p           | 2 |
| <i>circRIMS1</i> | miR-3678-3p           | 1 |
| <i>circRIMS1</i> | miR-374a-3p           | 1 |
| <i>circRIMS1</i> | miR-376c-3p           | 2 |
| <i>circRIMS1</i> | miR-379-5p            | 1 |
| <i>circRIMS1</i> | miR-3909              | 1 |
| <i>circRIMS1</i> | miR-3915              | 1 |
| <i>circRIMS1</i> | miR-3927-3p/6831-5p   | 2 |
| <i>circRIMS1</i> | miR-3935              | 1 |
| <i>circRIMS1</i> | miR-4257              | 1 |
| <i>circRIMS1</i> | miR-4263              | 1 |
| <i>circRIMS1</i> | miR-4281              | 1 |
| <i>circRIMS1</i> | miR-4299              | 4 |
| <i>circRIMS1</i> | miR-4301              | 1 |
| <i>circRIMS1</i> | miR-4312              | 1 |
| <i>circRIMS1</i> | miR-4325              | 1 |
| <i>circRIMS1</i> | miR-4327              | 1 |
| <i>circRIMS1</i> | miR-4432              | 1 |
| <i>circRIMS1</i> | miR-4433a-5p          | 2 |
| <i>circRIMS1</i> | miR-4433b-5p          | 1 |
| <i>circRIMS1</i> | miR-4451              | 1 |
| <i>circRIMS1</i> | miR-4456              | 4 |
| <i>circRIMS1</i> | miR-4482-3p           | 3 |
| <i>circRIMS1</i> | miR-449c-3p           | 1 |
| <i>circRIMS1</i> | miR-4501              | 1 |
| <i>circRIMS1</i> | miR-4517              | 1 |
| <i>circRIMS1</i> | miR-452-3p            | 1 |
| <i>circRIMS1</i> | miR-452-5p/892-3p     | 1 |
| <i>circRIMS1</i> | miR-4524-5p           | 1 |
| <i>circRIMS1</i> | miR-4639-3p           | 1 |
| <i>circRIMS1</i> | miR-4642              | 1 |
| <i>circRIMS1</i> | miR-4649-3p           | 1 |
| <i>circRIMS1</i> | miR-4650-3p           | 1 |
| <i>circRIMS1</i> | miR-4659a-3p/4659b-3p | 2 |
| <i>circRIMS1</i> | miR-4661-3p           | 1 |
| <i>circRIMS1</i> | miR-4663              | 1 |
| <i>circRIMS1</i> | miR-4666a-5p          | 1 |
| <i>circRIMS1</i> | miR-4668-3p           | 1 |

|                  |                      |   |
|------------------|----------------------|---|
| <i>circRIMS1</i> | miR-4669             | 1 |
| <i>circRIMS1</i> | miR-4670-3p          | 1 |
| <i>circRIMS1</i> | miR-4684-5p          | 2 |
| <i>circRIMS1</i> | miR-4689/6858-5p     | 1 |
| <i>circRIMS1</i> | miR-4690-5p          | 1 |
| <i>circRIMS1</i> | miR-4691-5p/6792-3p  | 1 |
| <i>circRIMS1</i> | miR-4693-5p          | 1 |
| <i>circRIMS1</i> | miR-4695-3p          | 2 |
| <i>circRIMS1</i> | miR-4699-3p          | 1 |
| <i>circRIMS1</i> | miR-4705             | 1 |
| <i>circRIMS1</i> | miR-4709-3p          | 1 |
| <i>circRIMS1</i> | miR-4711-3p          | 4 |
| <i>circRIMS1</i> | miR-4729             | 1 |
| <i>circRIMS1</i> | miR-4751             | 2 |
| <i>circRIMS1</i> | miR-4760-3p          | 1 |
| <i>circRIMS1</i> | miR-4768-5p/6833-3p  | 1 |
| <i>circRIMS1</i> | miR-4773             | 1 |
| <i>circRIMS1</i> | miR-4778-3p          | 2 |
| <i>circRIMS1</i> | miR-4782-5p/5706     | 2 |
| <i>circRIMS1</i> | miR-4799-5p          | 2 |
| <i>circRIMS1</i> | miR-488-3p           | 1 |
| <i>circRIMS1</i> | miR-493-5p           | 2 |
| <i>circRIMS1</i> | miR-5003-3p          | 1 |
| <i>circRIMS1</i> | miR-5004-5p          | 2 |
| <i>circRIMS1</i> | miR-511-3p           | 1 |
| <i>circRIMS1</i> | miR-515-5p/519e-5p   | 4 |
| <i>circRIMS1</i> | miR-516b-5p          | 2 |
| <i>circRIMS1</i> | miR-517-5p           | 1 |
| <i>circRIMS1</i> | miR-518-3p           | 1 |
| <i>circRIMS1</i> | miR-518e-3p          | 1 |
| <i>circRIMS1</i> | miR-5193             | 2 |
| <i>circRIMS1</i> | miR-519d-5p          | 2 |
| <i>circRIMS1</i> | miR-520f-5p          | 1 |
| <i>circRIMS1</i> | miR-520g-5p          | 1 |
| <i>circRIMS1</i> | miR-541-5p           | 2 |
| <i>circRIMS1</i> | miR-543              | 2 |
| <i>circRIMS1</i> | miR-548at-5p         | 1 |
| <i>circRIMS1</i> | miR-548az-5p/548t-5p | 1 |



|                  |                  |   |
|------------------|------------------|---|
| <i>circRIMS1</i> | miR-548e-5p      | 1 |
| <i>circRIMS1</i> | miR-548m         | 1 |
| <i>circRIMS1</i> | miR-548n         | 1 |
| <i>circRIMS1</i> | miR-548q         | 4 |
| <i>circRIMS1</i> | miR-5571-5p      | 1 |
| <i>circRIMS1</i> | miR-5579-3p      | 1 |
| <i>circRIMS1</i> | miR-5581-3p      | 1 |
| <i>circRIMS1</i> | miR-5583-3p      | 1 |
| <i>circRIMS1</i> | miR-5585-3p      | 2 |
| <i>circRIMS1</i> | miR-561-3p       | 1 |
| <i>circRIMS1</i> | miR-5680         | 1 |
| <i>circRIMS1</i> | miR-5681a        | 1 |
| <i>circRIMS1</i> | miR-5684         | 1 |
| <i>circRIMS1</i> | miR-5695         | 2 |
| <i>circRIMS1</i> | miR-5707         | 1 |
| <i>circRIMS1</i> | miR-573/3616-5p  | 2 |
| <i>circRIMS1</i> | miR-576-5p       | 1 |
| <i>circRIMS1</i> | miR-578          | 3 |
| <i>circRIMS1</i> | miR-587          | 1 |
| <i>circRIMS1</i> | miR-589-3p       | 2 |
| <i>circRIMS1</i> | miR-597-3p       | 1 |
| <i>circRIMS1</i> | miR-6070         | 1 |
| <i>circRIMS1</i> | miR-6073         | 1 |
| <i>circRIMS1</i> | miR-6076/6797-3p | 1 |
| <i>circRIMS1</i> | miR-6077         | 2 |
| <i>circRIMS1</i> | miR-6079         | 2 |
| <i>circRIMS1</i> | miR-611/3131     | 2 |
| <i>circRIMS1</i> | miR-6128         | 2 |
| <i>circRIMS1</i> | miR-6131         | 2 |
| <i>circRIMS1</i> | miR-6165         | 1 |
| <i>circRIMS1</i> | miR-626/6876-3p  | 2 |
| <i>circRIMS1</i> | miR-628-3p       | 1 |
| <i>circRIMS1</i> | miR-629-3p       | 1 |
| <i>circRIMS1</i> | miR-632/4288     | 4 |
| <i>circRIMS1</i> | miR-647          | 3 |
| <i>circRIMS1</i> | miR-6510-5p      | 1 |
| <i>circRIMS1</i> | miR-6516-3p      | 1 |
| <i>circRIMS1</i> | miR-6516-5p      | 1 |

|                  |                         |   |
|------------------|-------------------------|---|
| <i>circRIMS1</i> | miR-657                 | 1 |
| <i>circRIMS1</i> | miR-659-3p              | 2 |
| <i>circRIMS1</i> | miR-660-3p              | 2 |
| <i>circRIMS1</i> | miR-6730-5p             | 1 |
| <i>circRIMS1</i> | miR-6749-3p             | 1 |
| <i>circRIMS1</i> | miR-6757-5p             | 2 |
| <i>circRIMS1</i> | miR-6765-5p             | 2 |
| <i>circRIMS1</i> | miR-6768-5p             | 2 |
| <i>circRIMS1</i> | miR-6809-3p             | 1 |
| <i>circRIMS1</i> | miR-6818-3p             | 1 |
| <i>circRIMS1</i> | miR-6842-3p             | 3 |
| <i>circRIMS1</i> | miR-6845-3p             | 4 |
| <i>circRIMS1</i> | miR-6847-5p             | 1 |
| <i>circRIMS1</i> | miR-6853-3p             | 1 |
| <i>circRIMS1</i> | miR-6870-3p             | 1 |
| <i>circRIMS1</i> | miR-6873-3p             | 3 |
| <i>circRIMS1</i> | miR-6875-3p             | 2 |
| <i>circRIMS1</i> | miR-6880-3p             | 1 |
| <i>circRIMS1</i> | miR-6885-3p             | 1 |
| <i>circRIMS1</i> | miR-7-5p                | 2 |
| <i>circRIMS1</i> | miR-7159-3p             | 3 |
| <i>circRIMS1</i> | miR-7160-5p             | 1 |
| <i>circRIMS1</i> | miR-7161-3p             | 1 |
| <i>circRIMS1</i> | miR-7162-3p             | 1 |
| <i>circRIMS1</i> | miR-744-3p              | 1 |
| <i>circRIMS1</i> | miR-7703                | 1 |
| <i>circRIMS1</i> | miR-7978                | 4 |
| <i>circRIMS1</i> | miR-8060                | 2 |
| <i>circRIMS1</i> | miR-8068                | 1 |
| <i>circRIMS1</i> | miR-8077                | 1 |
| <i>circRIMS1</i> | miR-8087                | 1 |
| <i>circRIMS1</i> | miR-876-5p              | 2 |
| <i>circRIMS1</i> | miR-877-3p              | 1 |
| <i>circRIMS1</i> | miR-889-5p              | 1 |
| <i>circRIMS1</i> | miR-921                 | 1 |
| <i>circRIMS1</i> | miR-92a-1-5p            | 1 |
| <i>circRIMS1</i> | miR-940/6808-5p/6893-5p | 1 |
| <i>circRIMS1</i> | miR-942-5p              | 1 |

|                  |                          |   |
|------------------|--------------------------|---|
| <i>circRIMS1</i> | miR-96-3p                | 1 |
| <i>circRIMS1</i> | miR-96-5p/1271-5p        | 4 |
| <i>circRIMS1</i> | miR-10-5p                | 3 |
| <i>circRIMS1</i> | miR-103a-2-5p            | 4 |
| <i>circRIMS1</i> | miR-105-5p               | 1 |
| <i>circRIMS1</i> | miR-1183                 | 2 |
| <i>circRIMS1</i> | miR-1184                 | 1 |
| <i>circRIMS1</i> | miR-1197                 | 1 |
| <i>circRIMS1</i> | miR-1199-3p              | 1 |
| <i>circRIMS1</i> | miR-1200                 | 2 |
| <i>circRIMS1</i> | miR-1205                 | 1 |
| <i>circRIMS1</i> | miR-122-5p               | 1 |
| <i>circRIMS1</i> | miR-1224-3p              | 4 |
| <i>circRIMS1</i> | miR-1226-5p              | 1 |
| <i>circRIMS1</i> | miR-1227-3p              | 2 |
| <i>circRIMS1</i> | miR-1227-5p              | 1 |
| <i>circRIMS1</i> | miR-1228-5p              | 1 |
| <i>circRIMS1</i> | miR-1229-3p              | 1 |
| <i>circRIMS1</i> | miR-1233-5p/6778-5p      | 1 |
| <i>circRIMS1</i> | miR-1236-3p              | 4 |
| <i>circRIMS1</i> | miR-1237-5p/4488/4697-5p | 2 |
| <i>circRIMS1</i> | miR-124-3p.2/506-3p      | 2 |
| <i>circRIMS1</i> | miR-1245b-5p             | 1 |
| <i>circRIMS1</i> | miR-1246                 | 2 |
| <i>circRIMS1</i> | miR-1249-5p/6797-5p      | 2 |
| <i>circRIMS1</i> | miR-1252-3p              | 1 |
| <i>circRIMS1</i> | miR-1254/3116            | 1 |
| <i>circRIMS1</i> | miR-1255b-2-3p           | 2 |
| <i>circRIMS1</i> | miR-125a-3p              | 1 |
| <i>circRIMS1</i> | miR-1262/4701-3p/6736-5p | 1 |
| <i>circRIMS1</i> | miR-1266-3p              | 1 |
| <i>circRIMS1</i> | miR-1269                 | 1 |
| <i>circRIMS1</i> | miR-1272                 | 2 |
| <i>circRIMS1</i> | miR-1273f                | 1 |
| <i>circRIMS1</i> | miR-1273g-3p             | 3 |
| <i>circRIMS1</i> | miR-1275/4665-5p         | 3 |
| <i>circRIMS1</i> | miR-1284                 | 3 |
| <i>circRIMS1</i> | miR-1286                 | 1 |

|                  |                                      |   |
|------------------|--------------------------------------|---|
| <i>circRIMS1</i> | miR-1287-5p                          | 3 |
| <i>circRIMS1</i> | miR-1288-3p                          | 1 |
| <i>circRIMS1</i> | miR-129-3p                           | 1 |
| <i>circRIMS1</i> | miR-1291/6775-3p                     | 3 |
| <i>circRIMS1</i> | miR-1293/4483                        | 1 |
| <i>circRIMS1</i> | miR-1294                             | 2 |
| <i>circRIMS1</i> | miR-1296-3p                          | 2 |
| <i>circRIMS1</i> | miR-1296-5p                          | 1 |
| <i>circRIMS1</i> | miR-1301-3p                          | 1 |
| <i>circRIMS1</i> | miR-1302/4298                        | 1 |
| <i>circRIMS1</i> | miR-1304-3p                          | 1 |
| <i>circRIMS1</i> | miR-1306-5p                          | 4 |
| <i>circRIMS1</i> | miR-1322                             | 2 |
| <i>circRIMS1</i> | miR-134-3p                           | 1 |
| <i>circRIMS1</i> | miR-137                              | 1 |
| <i>circRIMS1</i> | miR-139-3p                           | 1 |
| <i>circRIMS1</i> | miR-140-3p.1                         | 4 |
| <i>circRIMS1</i> | miR-141-5p                           | 5 |
| <i>circRIMS1</i> | miR-142-5p                           | 1 |
| <i>circRIMS1</i> | miR-143-3p                           | 1 |
| <i>circRIMS1</i> | miR-145-3p                           | 2 |
| <i>circRIMS1</i> | miR-145-5p                           | 3 |
| <i>circRIMS1</i> | miR-1468-5p                          | 2 |
| <i>circRIMS1</i> | miR-146b-3p                          | 2 |
| <i>circRIMS1</i> | miR-1470                             | 1 |
| <i>circRIMS1</i> | miR-148a-5p                          | 1 |
| <i>circRIMS1</i> | miR-148b-5p/6874-3p                  | 2 |
| <i>circRIMS1</i> | miR-149-3p/4728-5p/6785-5p/6883-5p   | 3 |
| <i>circRIMS1</i> | miR-149-5p                           | 2 |
| <i>circRIMS1</i> | miR-15-5p/16-5p/195-5p/424-5p/497-5p | 1 |
| <i>circRIMS1</i> | miR-150-5p                           | 2 |
| <i>circRIMS1</i> | miR-153-5p                           | 1 |
| <i>circRIMS1</i> | miR-1539                             | 2 |
| <i>circRIMS1</i> | miR-155-3p                           | 1 |
| <i>circRIMS1</i> | miR-155-5p                           | 1 |
| <i>circRIMS1</i> | miR-17-3p                            | 1 |
| <i>circRIMS1</i> | miR-181-3p/4420                      | 2 |
| <i>circRIMS1</i> | miR-1825                             | 4 |

|                  |                     |   |
|------------------|---------------------|---|
| <i>circRIMS1</i> | miR-183-5p.1        | 2 |
| <i>circRIMS1</i> | miR-183-5p.2        | 4 |
| <i>circRIMS1</i> | miR-18a-3p          | 3 |
| <i>circRIMS1</i> | miR-18b-3p          | 1 |
| <i>circRIMS1</i> | miR-1909-3p/6722-3p | 1 |
| <i>circRIMS1</i> | miR-1910-5p         | 1 |
| <i>circRIMS1</i> | miR-1911-3p         | 3 |
| <i>circRIMS1</i> | miR-1914-5p         | 1 |
| <i>circRIMS1</i> | miR-1915-3p/6764-5p | 1 |
| <i>circRIMS1</i> | miR-1915-5p         | 1 |
| <i>circRIMS1</i> | miR-192-3p          | 1 |
| <i>circRIMS1</i> | miR-193-3p          | 4 |
| <i>circRIMS1</i> | miR-194-3p          | 2 |
| <i>circRIMS1</i> | miR-196a-3p         | 3 |
| <i>circRIMS1</i> | miR-197-3p          | 1 |
| <i>circRIMS1</i> | miR-1972            | 1 |
| <i>circRIMS1</i> | miR-1976            | 1 |
| <i>circRIMS1</i> | miR-198             | 1 |
| <i>circRIMS1</i> | miR-199-5p          | 4 |
| <i>circRIMS1</i> | miR-202-3p          | 2 |
| <i>circRIMS1</i> | miR-203a-3p.1       | 1 |
| <i>circRIMS1</i> | miR-203b-3p         | 1 |
| <i>circRIMS1</i> | miR-204-3p/4646-5p  | 3 |
| <i>circRIMS1</i> | miR-205-5p          | 2 |
| <i>circRIMS1</i> | miR-2110            | 3 |
| <i>circRIMS1</i> | miR-2113            | 1 |
| <i>circRIMS1</i> | miR-2114-3p         | 2 |
| <i>circRIMS1</i> | miR-2114-5p         | 4 |
| <i>circRIMS1</i> | miR-2115-5p         | 1 |
| <i>circRIMS1</i> | miR-2116-3p         | 2 |
| <i>circRIMS1</i> | miR-2116-5p         | 2 |
| <i>circRIMS1</i> | miR-214-3p/3619-5p  | 2 |
| <i>circRIMS1</i> | miR-217             | 1 |
| <i>circRIMS1</i> | miR-218-5p          | 3 |
| <i>circRIMS1</i> | miR-219-5p          | 1 |
| <i>circRIMS1</i> | miR-22-3p           | 1 |
| <i>circRIMS1</i> | miR-22-5p           | 2 |
| <i>circRIMS1</i> | miR-2276-3p         | 1 |

|                  |                                              |   |
|------------------|----------------------------------------------|---|
| <i>circRIMS1</i> | miR-2276-5p                                  | 3 |
| <i>circRIMS1</i> | miR-2278                                     | 1 |
| <i>circRIMS1</i> | miR-2355-5p                                  | 3 |
| <i>circRIMS1</i> | miR-24-5p                                    | 2 |
| <i>circRIMS1</i> | miR-2467-5p                                  | 1 |
| <i>circRIMS1</i> | miR-25-5p                                    | 1 |
| <i>circRIMS1</i> | miR-26-5p                                    | 2 |
| <i>circRIMS1</i> | miR-2682-3p/6781-3p                          | 3 |
| <i>circRIMS1</i> | miR-27-3p                                    | 1 |
| <i>circRIMS1</i> | miR-27a-5p                                   | 1 |
| <i>circRIMS1</i> | miR-28-3p                                    | 1 |
| <i>circRIMS1</i> | miR-2861                                     | 2 |
| <i>circRIMS1</i> | miR-296-5p                                   | 2 |
| <i>circRIMS1</i> | miR-297                                      | 1 |
| <i>circRIMS1</i> | miR-299-3p                                   | 2 |
| <i>circRIMS1</i> | miR-29a-5p                                   | 1 |
| <i>circRIMS1</i> | miR-301a-5p/301b-5p                          | 3 |
| <i>circRIMS1</i> | miR-302a-5p                                  | 1 |
| <i>circRIMS1</i> | miR-3064-5p                                  | 1 |
| <i>circRIMS1</i> | miR-3074-5p                                  | 2 |
| <i>circRIMS1</i> | miR-30b-3p/1273h-5p/3689-3p/6779-5p/6780a-5p |   |
| <i>circRIMS1</i> | miR-30c-3p/6788-5p                           | 1 |
| <i>circRIMS1</i> | miR-31-3p                                    | 1 |
| <i>circRIMS1</i> | miR-3117-5p                                  | 4 |
| <i>circRIMS1</i> | miR-3122/3913-5p                             | 1 |
| <i>circRIMS1</i> | miR-3124-3p                                  | 2 |
| <i>circRIMS1</i> | miR-3128                                     | 2 |
| <i>circRIMS1</i> | miR-3134                                     | 2 |
| <i>circRIMS1</i> | miR-3135a                                    | 1 |
| <i>circRIMS1</i> | miR-3135b                                    | 3 |
| <i>circRIMS1</i> | miR-3136-5p/4439                             | 2 |
| <i>circRIMS1</i> | miR-3138                                     | 1 |
| <i>circRIMS1</i> | miR-3140-5p                                  | 2 |
| <i>circRIMS1</i> | miR-3144-5p                                  | 2 |
| <i>circRIMS1</i> | miR-3150a-3p                                 | 3 |
| <i>circRIMS1</i> | miR-3150b-3p                                 | 2 |
| <i>circRIMS1</i> | miR-3151-3p                                  | 2 |
| <i>circRIMS1</i> | miR-3151-5p                                  | 2 |

|                  |                           |   |
|------------------|---------------------------|---|
| <i>circRIMS1</i> | miR-3152-5p               | 1 |
| <i>circRIMS1</i> | miR-3153/6733-5p/6739-5p  | 1 |
| <i>circRIMS1</i> | miR-3157-3p               | 3 |
| <i>circRIMS1</i> | miR-3157-5p               | 1 |
| <i>circRIMS1</i> | miR-3158-3p               | 1 |
| <i>circRIMS1</i> | miR-3158-5p               | 1 |
| <i>circRIMS1</i> | miR-3160-3p               | 1 |
| <i>circRIMS1</i> | miR-3162-3p               | 1 |
| <i>circRIMS1</i> | miR-3163                  | 1 |
| <i>circRIMS1</i> | miR-3168                  | 2 |
| <i>circRIMS1</i> | miR-3170/6855-5p          | 1 |
| <i>circRIMS1</i> | miR-3173-5p               | 2 |
| <i>circRIMS1</i> | miR-3175                  | 4 |
| <i>circRIMS1</i> | miR-3176/3922-3p          | 1 |
| <i>circRIMS1</i> | miR-3177-5p               | 2 |
| <i>circRIMS1</i> | miR-3178                  | 1 |
| <i>circRIMS1</i> | miR-3180-3p               | 1 |
| <i>circRIMS1</i> | miR-3180-5p               | 1 |
| <i>circRIMS1</i> | miR-3182                  | 2 |
| <i>circRIMS1</i> | miR-3183/4723-3p/6769b-3p | 2 |
| <i>circRIMS1</i> | miR-3186-5p               | 1 |
| <i>circRIMS1</i> | miR-3188                  | 1 |
| <i>circRIMS1</i> | miR-3189-5p               | 1 |
| <i>circRIMS1</i> | miR-3190-3p               | 1 |
| <i>circRIMS1</i> | miR-3190-5p               | 1 |
| <i>circRIMS1</i> | miR-3191-3p               | 2 |
| <i>circRIMS1</i> | miR-3191-5p               | 1 |
| <i>circRIMS1</i> | miR-3192-3p               | 1 |
| <i>circRIMS1</i> | miR-3192-5p               | 3 |
| <i>circRIMS1</i> | miR-3193                  | 1 |
| <i>circRIMS1</i> | miR-3194-3p               | 2 |
| <i>circRIMS1</i> | miR-3197                  | 1 |
| <i>circRIMS1</i> | miR-3199/8052             | 2 |
| <i>circRIMS1</i> | miR-320                   | 2 |
| <i>circRIMS1</i> | miR-3200-5p               | 1 |
| <i>circRIMS1</i> | miR-320e                  | 2 |
| <i>circRIMS1</i> | miR-323a-5p               | 1 |
| <i>circRIMS1</i> | miR-323b-3p               | 1 |

|                  |                       |   |
|------------------|-----------------------|---|
| <i>circRIMS1</i> | miR-324-3p/1913       | 3 |
| <i>circRIMS1</i> | miR-326               | 2 |
| <i>circRIMS1</i> | miR-328-3p            | 1 |
| <i>circRIMS1</i> | miR-33-5p             | 1 |
| <i>circRIMS1</i> | miR-330-3p            | 1 |
| <i>circRIMS1</i> | miR-330-3p.2          | 1 |
| <i>circRIMS1</i> | miR-331-3p            | 5 |
| <i>circRIMS1</i> | miR-335-3p            | 1 |
| <i>circRIMS1</i> | miR-338-3p            | 2 |
| <i>circRIMS1</i> | miR-339-5p            | 2 |
| <i>circRIMS1</i> | miR-340-3p/6827-3p    | 2 |
| <i>circRIMS1</i> | miR-342-5p/4664-5p    | 1 |
| <i>circRIMS1</i> | miR-345-3p            | 2 |
| <i>circRIMS1</i> | miR-346               | 3 |
| <i>circRIMS1</i> | miR-3605-3p           | 2 |
| <i>circRIMS1</i> | miR-361-3p            | 1 |
| <i>circRIMS1</i> | miR-3612              | 1 |
| <i>circRIMS1</i> | miR-3614-3p           | 1 |
| <i>circRIMS1</i> | miR-3614-5p           | 1 |
| <i>circRIMS1</i> | miR-3616-3p           | 2 |
| <i>circRIMS1</i> | miR-3618              | 1 |
| <i>circRIMS1</i> | miR-3622a-3p/3622b-3p | 2 |
| <i>circRIMS1</i> | miR-3622a-5p          | 1 |
| <i>circRIMS1</i> | miR-363-5p/6745       | 1 |
| <i>circRIMS1</i> | miR-3646              | 1 |
| <i>circRIMS1</i> | miR-3649              | 1 |
| <i>circRIMS1</i> | miR-365-3p            | 2 |
| <i>circRIMS1</i> | miR-3652/4430         | 3 |
| <i>circRIMS1</i> | miR-3653-3p           | 1 |
| <i>circRIMS1</i> | miR-3653-5p           | 1 |
| <i>circRIMS1</i> | miR-365a-5p/365b-5p   | 2 |
| <i>circRIMS1</i> | miR-3660/4526         | 5 |
| <i>circRIMS1</i> | miR-3663-5p           | 2 |
| <i>circRIMS1</i> | miR-3664-5p           | 1 |
| <i>circRIMS1</i> | miR-3671              | 1 |
| <i>circRIMS1</i> | miR-3675-5p           | 1 |
| <i>circRIMS1</i> | miR-3677-5p           | 1 |
| <i>circRIMS1</i> | miR-3679-3p           | 1 |



|                  |                     |   |
|------------------|---------------------|---|
| <i>circRIMS1</i> | miR-3682-3p         | 1 |
| <i>circRIMS1</i> | miR-3686            | 1 |
| <i>circRIMS1</i> | miR-3688-5p         | 1 |
| <i>circRIMS1</i> | miR-3689d/6851-5p   | 2 |
| <i>circRIMS1</i> | miR-369-5p          | 1 |
| <i>circRIMS1</i> | miR-3692-3p         | 2 |
| <i>circRIMS1</i> | miR-3692-5p         | 5 |
| <i>circRIMS1</i> | miR-370-3p          | 6 |
| <i>circRIMS1</i> | miR-378a-5p         | 2 |
| <i>circRIMS1</i> | miR-378g            | 2 |
| <i>circRIMS1</i> | miR-378j/6839-5p    | 2 |
| <i>circRIMS1</i> | miR-3907            | 3 |
| <i>circRIMS1</i> | miR-3912-5p         | 1 |
| <i>circRIMS1</i> | miR-3913-3p         | 2 |
| <i>circRIMS1</i> | miR-3918            | 1 |
| <i>circRIMS1</i> | miR-3919            | 1 |
| <i>circRIMS1</i> | miR-3920            | 1 |
| <i>circRIMS1</i> | miR-3921/4653-5p    | 3 |
| <i>circRIMS1</i> | miR-3924            | 1 |
| <i>circRIMS1</i> | miR-3925-3p         | 4 |
| <i>circRIMS1</i> | miR-3926            | 1 |
| <i>circRIMS1</i> | miR-3927-5p         | 1 |
| <i>circRIMS1</i> | miR-3929/4419b/4478 | 4 |
| <i>circRIMS1</i> | miR-3934-3p         | 1 |
| <i>circRIMS1</i> | miR-3934-5p         | 1 |
| <i>circRIMS1</i> | miR-3943            | 1 |
| <i>circRIMS1</i> | miR-3944-5p         | 2 |
| <i>circRIMS1</i> | miR-3975            | 1 |
| <i>circRIMS1</i> | miR-3977            | 2 |
| <i>circRIMS1</i> | miR-411-3p          | 1 |
| <i>circRIMS1</i> | miR-412-3p/6754-3p  | 1 |
| <i>circRIMS1</i> | miR-412-5p          | 1 |
| <i>circRIMS1</i> | miR-423-5p          | 2 |
| <i>circRIMS1</i> | miR-425-3p          | 2 |
| <i>circRIMS1</i> | miR-425-5p          | 2 |
| <i>circRIMS1</i> | miR-4251            | 1 |
| <i>circRIMS1</i> | miR-4252            | 1 |
| <i>circRIMS1</i> | miR-4256            | 3 |

|                  |                                              |   |
|------------------|----------------------------------------------|---|
| <i>circRIMS1</i> | miR-4260                                     | 1 |
| <i>circRIMS1</i> | miR-4261                                     | 1 |
| <i>circRIMS1</i> | miR-4264                                     | 1 |
| <i>circRIMS1</i> | miR-4265/4296/4322                           | 1 |
| <i>circRIMS1</i> | miR-4267                                     | 1 |
| <i>circRIMS1</i> | miR-4268                                     | 3 |
| <i>circRIMS1</i> | miR-4269/6715b-5p                            | 1 |
| <i>circRIMS1</i> | miR-4270/4441/6754-5p                        | 1 |
| <i>circRIMS1</i> | miR-4273/7156-5p                             | 2 |
| <i>circRIMS1</i> | miR-4274                                     | 1 |
| <i>circRIMS1</i> | miR-4277                                     | 1 |
| <i>circRIMS1</i> | miR-4278                                     | 1 |
| <i>circRIMS1</i> | miR-4286                                     | 1 |
| <i>circRIMS1</i> | miR-4290                                     | 3 |
| <i>circRIMS1</i> | miR-4291                                     | 1 |
| <i>circRIMS1</i> | miR-4292/6791-5p                             | 3 |
| <i>circRIMS1</i> | miR-4293                                     | 2 |
| <i>circRIMS1</i> | miR-4297/5581-5p                             | 1 |
| <i>circRIMS1</i> | miR-4302                                     | 3 |
| <i>circRIMS1</i> | miR-4303                                     | 1 |
| <i>circRIMS1</i> | miR-4305                                     | 1 |
| <i>circRIMS1</i> | miR-4308                                     | 3 |
| <i>circRIMS1</i> | miR-431-5p                                   | 1 |
| <i>circRIMS1</i> | miR-4310/7157-5p                             | 1 |
| <i>circRIMS1</i> | miR-4313                                     | 1 |
| <i>circRIMS1</i> | miR-4314                                     | 3 |
| <i>circRIMS1</i> | miR-4316                                     | 2 |
| <i>circRIMS1</i> | miR-432-5p                                   | 1 |
| <i>circRIMS1</i> | miR-4323                                     | 1 |
| <i>circRIMS1</i> | miR-4329                                     | 1 |
| <i>circRIMS1</i> | miR-433-3p                                   | 2 |
| <i>circRIMS1</i> | miR-4330                                     | 1 |
| <i>circRIMS1</i> | miR-4422                                     | 1 |
| <i>circRIMS1</i> | miR-4424                                     | 1 |
| <i>circRIMS1</i> | miR-4433a-3p                                 | 1 |
| <i>circRIMS1</i> | miR-4436b-3p/4632-5p/6735-5p/6879-5p/7843-5p | 1 |
| <i>circRIMS1</i> | miR-4436b-5p                                 | 4 |
| <i>circRIMS1</i> | miR-4443                                     | 2 |

|                  |                     |   |
|------------------|---------------------|---|
| <i>circRIMS1</i> | miR-4445-5p         | 1 |
| <i>circRIMS1</i> | miR-4446-3p         | 1 |
| <i>circRIMS1</i> | miR-4447/4472       | 2 |
| <i>circRIMS1</i> | miR-4448            | 3 |
| <i>circRIMS1</i> | miR-4453/4538       | 2 |
| <i>circRIMS1</i> | miR-4459            | 1 |
| <i>circRIMS1</i> | miR-4468            | 2 |
| <i>circRIMS1</i> | miR-4474-3p         | 1 |
| <i>circRIMS1</i> | miR-4480            | 1 |
| <i>circRIMS1</i> | miR-4481/4745-5p    | 1 |
| <i>circRIMS1</i> | miR-4486            | 2 |
| <i>circRIMS1</i> | miR-4487            | 1 |
| <i>circRIMS1</i> | miR-4491/4657       | 2 |
| <i>circRIMS1</i> | miR-449b-3p         | 1 |
| <i>circRIMS1</i> | miR-4502            | 1 |
| <i>circRIMS1</i> | miR-4505/5787       | 3 |
| <i>circRIMS1</i> | miR-450a-1-3p       | 1 |
| <i>circRIMS1</i> | miR-450a-2-3p       | 1 |
| <i>circRIMS1</i> | miR-450b-3p/769-3p  | 3 |
| <i>circRIMS1</i> | miR-4512            | 3 |
| <i>circRIMS1</i> | miR-4514/4692       | 1 |
| <i>circRIMS1</i> | miR-4515            | 1 |
| <i>circRIMS1</i> | miR-4519            | 1 |
| <i>circRIMS1</i> | miR-451b            | 3 |
| <i>circRIMS1</i> | miR-4520-2-3p       | 1 |
| <i>circRIMS1</i> | miR-4521            | 2 |
| <i>circRIMS1</i> | miR-4522            | 1 |
| <i>circRIMS1</i> | miR-4524a-3p        | 2 |
| <i>circRIMS1</i> | miR-4528            | 2 |
| <i>circRIMS1</i> | miR-4529-3p         | 1 |
| <i>circRIMS1</i> | miR-4530            | 2 |
| <i>circRIMS1</i> | miR-4534/8082       | 2 |
| <i>circRIMS1</i> | miR-4535            | 1 |
| <i>circRIMS1</i> | miR-4536-5p         | 1 |
| <i>circRIMS1</i> | miR-4539            | 1 |
| <i>circRIMS1</i> | miR-455-3p.1        | 1 |
| <i>circRIMS1</i> | miR-455-5p          | 2 |
| <i>circRIMS1</i> | miR-4633-3p/6500-5p | 1 |

|                  |                                  |   |
|------------------|----------------------------------|---|
| <i>circRIMS1</i> | miR-4645-5p/4673                 | 3 |
| <i>circRIMS1</i> | miR-4648                         | 1 |
| <i>circRIMS1</i> | miR-4650-5p                      | 1 |
| <i>circRIMS1</i> | miR-4652-3p                      | 2 |
| <i>circRIMS1</i> | miR-4652-5p                      | 2 |
| <i>circRIMS1</i> | miR-4654/4769-5p                 | 1 |
| <i>circRIMS1</i> | miR-4655-3p                      | 1 |
| <i>circRIMS1</i> | miR-4660                         | 1 |
| <i>circRIMS1</i> | miR-4666b                        | 1 |
| <i>circRIMS1</i> | miR-4667-3p                      | 1 |
| <i>circRIMS1</i> | miR-4667-5p/4700-5p/8089         | 4 |
| <i>circRIMS1</i> | miR-4668-5p                      | 1 |
| <i>circRIMS1</i> | miR-4677-5p                      | 2 |
| <i>circRIMS1</i> | miR-4683                         | 1 |
| <i>circRIMS1</i> | miR-4687-3p                      | 1 |
| <i>circRIMS1</i> | miR-4687-5p                      | 1 |
| <i>circRIMS1</i> | miR-4690-3p/5685                 | 3 |
| <i>circRIMS1</i> | miR-4691-3p                      | 1 |
| <i>circRIMS1</i> | miR-4694-3p                      | 1 |
| <i>circRIMS1</i> | miR-4695-5p                      | 2 |
| <i>circRIMS1</i> | miR-4703-3p                      | 1 |
| <i>circRIMS1</i> | miR-4704-5p                      | 2 |
| <i>circRIMS1</i> | miR-4708-5p                      | 1 |
| <i>circRIMS1</i> | miR-4711-5p                      | 1 |
| <i>circRIMS1</i> | miR-4713-3p                      | 1 |
| <i>circRIMS1</i> | miR-4714-5p                      | 1 |
| <i>circRIMS1</i> | miR-4715-3p                      | 3 |
| <i>circRIMS1</i> | miR-4716-3p/6794-5p              | 2 |
| <i>circRIMS1</i> | miR-4717-5p                      | 1 |
| <i>circRIMS1</i> | miR-4720-3p                      | 1 |
| <i>circRIMS1</i> | miR-4720-5p/4799-3p/5588-5p      | 2 |
| <i>circRIMS1</i> | miR-4721                         | 2 |
| <i>circRIMS1</i> | miR-4722-3p/6727-3p              | 2 |
| <i>circRIMS1</i> | miR-4722-5p                      | 1 |
| <i>circRIMS1</i> | miR-4723-5p/5698/6870-5p/7111-5p | 2 |
| <i>circRIMS1</i> | miR-4725-5p                      | 3 |
| <i>circRIMS1</i> | miR-4726-3p                      | 1 |
| <i>circRIMS1</i> | miR-4727-5p                      | 2 |

|                  |                     |   |
|------------------|---------------------|---|
| <i>circRIMS1</i> | miR-4730            | 1 |
| <i>circRIMS1</i> | miR-4731-5p         | 2 |
| <i>circRIMS1</i> | miR-4733-5p         | 1 |
| <i>circRIMS1</i> | miR-4734            | 1 |
| <i>circRIMS1</i> | miR-4737            | 1 |
| <i>circRIMS1</i> | miR-4739            | 2 |
| <i>circRIMS1</i> | miR-4740-5p         | 1 |
| <i>circRIMS1</i> | miR-4742-5p         | 1 |
| <i>circRIMS1</i> | miR-4743-3p         | 2 |
| <i>circRIMS1</i> | miR-4752            | 3 |
| <i>circRIMS1</i> | miR-4753-3p         | 1 |
| <i>circRIMS1</i> | miR-4756-3p         | 1 |
| <i>circRIMS1</i> | miR-4757-5p/6744-3p | 4 |
| <i>circRIMS1</i> | miR-4758-3p         | 1 |
| <i>circRIMS1</i> | miR-4761-3p         | 1 |
| <i>circRIMS1</i> | miR-4763-5p         | 1 |
| <i>circRIMS1</i> | miR-4764-5p         | 2 |
| <i>circRIMS1</i> | miR-4766-5p         | 1 |
| <i>circRIMS1</i> | miR-4768-3p         | 1 |
| <i>circRIMS1</i> | miR-4769-3p/6817-5p | 1 |
| <i>circRIMS1</i> | miR-4772-3p         | 1 |
| <i>circRIMS1</i> | miR-4774-3p         | 1 |
| <i>circRIMS1</i> | miR-4776-5p         | 1 |
| <i>circRIMS1</i> | miR-4777-5p         | 1 |
| <i>circRIMS1</i> | miR-4779            | 2 |
| <i>circRIMS1</i> | miR-4780            | 1 |
| <i>circRIMS1</i> | miR-4785            | 1 |
| <i>circRIMS1</i> | miR-4790-3p         | 1 |
| <i>circRIMS1</i> | miR-4796-3p         | 1 |
| <i>circRIMS1</i> | miR-4797-3p         | 1 |
| <i>circRIMS1</i> | miR-4797-5p         | 2 |
| <i>circRIMS1</i> | miR-4800-3p         | 2 |
| <i>circRIMS1</i> | miR-4800-5p         | 1 |
| <i>circRIMS1</i> | miR-4802-5p         | 1 |
| <i>circRIMS1</i> | miR-4804-3p         | 1 |
| <i>circRIMS1</i> | miR-483-3p.1        | 2 |
| <i>circRIMS1</i> | miR-483-3p.2        | 1 |
| <i>circRIMS1</i> | miR-484/3155        | 2 |

|                  |                             |   |
|------------------|-----------------------------|---|
| <i>circRIMS1</i> | miR-485-5p                  | 1 |
| <i>circRIMS1</i> | miR-486-3p                  | 2 |
| <i>circRIMS1</i> | miR-489-3p                  | 4 |
| <i>circRIMS1</i> | miR-491-3p                  | 2 |
| <i>circRIMS1</i> | miR-491-5p                  | 2 |
| <i>circRIMS1</i> | miR-492                     | 2 |
| <i>circRIMS1</i> | miR-494-3p                  | 1 |
| <i>circRIMS1</i> | miR-4999-3p                 | 1 |
| <i>circRIMS1</i> | miR-499a-3p/499b-3p         | 3 |
| <i>circRIMS1</i> | miR-5000-3p                 | 1 |
| <i>circRIMS1</i> | miR-5001-3p                 | 2 |
| <i>circRIMS1</i> | miR-5002-3p                 | 1 |
| <i>circRIMS1</i> | miR-5002-5p                 | 2 |
| <i>circRIMS1</i> | miR-5007-5p                 | 1 |
| <i>circRIMS1</i> | miR-5008-3p/6737-3p/7157-3p | 1 |
| <i>circRIMS1</i> | miR-5008-5p                 | 1 |
| <i>circRIMS1</i> | miR-5009-5p/8058            | 1 |
| <i>circRIMS1</i> | miR-500b-3p                 | 2 |
| <i>circRIMS1</i> | miR-501-3p/502-3p           | 1 |
| <i>circRIMS1</i> | miR-5010-3p                 | 1 |
| <i>circRIMS1</i> | miR-5010-5p                 | 2 |
| <i>circRIMS1</i> | miR-5011-3p                 | 1 |
| <i>circRIMS1</i> | miR-503-5p                  | 1 |
| <i>circRIMS1</i> | miR-504-5p.1                | 3 |
| <i>circRIMS1</i> | miR-505-3p.1                | 1 |
| <i>circRIMS1</i> | miR-508-3p                  | 1 |
| <i>circRIMS1</i> | miR-5088-5p                 | 1 |
| <i>circRIMS1</i> | miR-5089-5p                 | 3 |
| <i>circRIMS1</i> | miR-509-3-5p/509-5p/4418    | 1 |
| <i>circRIMS1</i> | miR-5093                    | 1 |
| <i>circRIMS1</i> | miR-5100                    | 1 |
| <i>circRIMS1</i> | miR-511-5p                  | 2 |
| <i>circRIMS1</i> | miR-513a-3p/513c-3p/3606-3p | 1 |
| <i>circRIMS1</i> | miR-513a-5p                 | 1 |
| <i>circRIMS1</i> | miR-514a-5p                 | 1 |
| <i>circRIMS1</i> | miR-516a-3p/516b-3p/7162-5p | 1 |
| <i>circRIMS1</i> | miR-5186                    | 1 |
| <i>circRIMS1</i> | miR-5187-5p                 | 2 |

|                  |                    |   |
|------------------|--------------------|---|
| <i>circRIMS1</i> | miR-518a-5p/527    | 1 |
| <i>circRIMS1</i> | miR-518c-5p        | 2 |
| <i>circRIMS1</i> | miR-518d-5p/519-5p | 1 |
| <i>circRIMS1</i> | miR-5194           | 2 |
| <i>circRIMS1</i> | miR-5195-5p        | 2 |
| <i>circRIMS1</i> | miR-5197-5p        | 1 |
| <i>circRIMS1</i> | miR-522-3p         | 1 |
| <i>circRIMS1</i> | miR-526b-5p        | 1 |
| <i>circRIMS1</i> | miR-532-3p         | 2 |
| <i>circRIMS1</i> | miR-548aw          | 1 |
| <i>circRIMS1</i> | miR-555            | 1 |
| <i>circRIMS1</i> | miR-5572           | 1 |
| <i>circRIMS1</i> | miR-558            | 1 |
| <i>circRIMS1</i> | miR-5580-5p        | 1 |
| <i>circRIMS1</i> | miR-5582-5p        | 1 |
| <i>circRIMS1</i> | miR-5584-3p        | 2 |
| <i>circRIMS1</i> | miR-5588-3p        | 4 |
| <i>circRIMS1</i> | miR-5589-5p        | 2 |
| <i>circRIMS1</i> | miR-5591-3p        | 2 |
| <i>circRIMS1</i> | miR-567            | 1 |
| <i>circRIMS1</i> | miR-568            | 1 |
| <i>circRIMS1</i> | miR-5687           | 1 |
| <i>circRIMS1</i> | miR-5691           | 5 |
| <i>circRIMS1</i> | miR-5693           | 2 |
| <i>circRIMS1</i> | miR-5696           | 1 |
| <i>circRIMS1</i> | miR-5699-5p        | 1 |
| <i>circRIMS1</i> | miR-579-3p         | 1 |
| <i>circRIMS1</i> | miR-581            | 2 |
| <i>circRIMS1</i> | miR-584-5p         | 1 |
| <i>circRIMS1</i> | miR-590-3p         | 1 |
| <i>circRIMS1</i> | miR-592            | 1 |
| <i>circRIMS1</i> | miR-593-3p         | 1 |
| <i>circRIMS1</i> | miR-593-5p         | 2 |
| <i>circRIMS1</i> | miR-596            | 2 |
| <i>circRIMS1</i> | miR-599            | 1 |
| <i>circRIMS1</i> | miR-604            | 3 |
| <i>circRIMS1</i> | miR-6068           | 2 |
| <i>circRIMS1</i> | miR-6071           | 2 |

|                  |                                      |   |
|------------------|--------------------------------------|---|
| <i>circRIMS1</i> | miR-6075                             | 1 |
| <i>circRIMS1</i> | miR-608/4651                         | 1 |
| <i>circRIMS1</i> | miR-6081                             | 1 |
| <i>circRIMS1</i> | miR-6083                             | 1 |
| <i>circRIMS1</i> | miR-6087                             | 1 |
| <i>circRIMS1</i> | miR-6089                             | 1 |
| <i>circRIMS1</i> | miR-6090                             | 3 |
| <i>circRIMS1</i> | miR-612/1285-3p/3187-5p/5189-5p/6860 | 2 |
| <i>circRIMS1</i> | miR-6132/6836-5p                     | 1 |
| <i>circRIMS1</i> | miR-6134                             | 2 |
| <i>circRIMS1</i> | miR-616-3p                           | 2 |
| <i>circRIMS1</i> | miR-619-3p                           | 1 |
| <i>circRIMS1</i> | miR-619-5p/6506-5p                   | 3 |
| <i>circRIMS1</i> | miR-625-5p                           | 2 |
| <i>circRIMS1</i> | miR-628-5p                           | 2 |
| <i>circRIMS1</i> | miR-631/3661                         | 2 |
| <i>circRIMS1</i> | miR-635/6774-5p                      | 2 |
| <i>circRIMS1</i> | miR-636                              | 2 |
| <i>circRIMS1</i> | miR-637                              | 4 |
| <i>circRIMS1</i> | miR-638                              | 1 |
| <i>circRIMS1</i> | miR-640                              | 1 |
| <i>circRIMS1</i> | miR-642-3p                           | 1 |
| <i>circRIMS1</i> | miR-646                              | 1 |
| <i>circRIMS1</i> | miR-648                              | 2 |
| <i>circRIMS1</i> | miR-6499-3p                          | 1 |
| <i>circRIMS1</i> | miR-6500-3p                          | 1 |
| <i>circRIMS1</i> | miR-6501-3p                          | 2 |
| <i>circRIMS1</i> | miR-6505-5p                          | 1 |
| <i>circRIMS1</i> | miR-6507-5p                          | 1 |
| <i>circRIMS1</i> | miR-6508-5p/8067                     | 1 |
| <i>circRIMS1</i> | miR-6509-3p                          | 4 |
| <i>circRIMS1</i> | miR-6511-5p                          | 2 |
| <i>circRIMS1</i> | miR-6513-5p                          | 1 |
| <i>circRIMS1</i> | miR-6514-5p                          | 1 |
| <i>circRIMS1</i> | miR-6515-3p                          | 4 |
| <i>circRIMS1</i> | miR-6515-5p                          | 2 |
| <i>circRIMS1</i> | miR-652-3p                           | 1 |
| <i>circRIMS1</i> | miR-653-3p                           | 2 |



|                  |                             |   |
|------------------|-----------------------------|---|
| <i>circRIMS1</i> | miR-653-5p                  | 1 |
| <i>circRIMS1</i> | miR-656-5p                  | 1 |
| <i>circRIMS1</i> | miR-659-5p                  | 2 |
| <i>circRIMS1</i> | miR-661                     | 1 |
| <i>circRIMS1</i> | miR-663b                    | 2 |
| <i>circRIMS1</i> | miR-664a-5p/4794            | 2 |
| <i>circRIMS1</i> | miR-670-5p                  | 1 |
| <i>circRIMS1</i> | miR-6719-3p                 | 5 |
| <i>circRIMS1</i> | miR-6721-5p                 | 1 |
| <i>circRIMS1</i> | miR-6724-5p/6773-5p         | 1 |
| <i>circRIMS1</i> | miR-6728-3p                 | 1 |
| <i>circRIMS1</i> | miR-6728-5p                 | 3 |
| <i>circRIMS1</i> | miR-6730-3p                 | 5 |
| <i>circRIMS1</i> | miR-6732-5p                 | 2 |
| <i>circRIMS1</i> | miR-6733-3p                 | 3 |
| <i>circRIMS1</i> | miR-6734-5p                 | 1 |
| <i>circRIMS1</i> | miR-6735-3p                 | 1 |
| <i>circRIMS1</i> | miR-6736-3p                 | 1 |
| <i>circRIMS1</i> | miR-6737-5p/6812-5p/6819-5p | 1 |
| <i>circRIMS1</i> | miR-6739-3p                 | 3 |
| <i>circRIMS1</i> | miR-6740-3p                 | 1 |
| <i>circRIMS1</i> | miR-6741-5p                 | 1 |
| <i>circRIMS1</i> | miR-6742-3p                 | 2 |
| <i>circRIMS1</i> | miR-6742-5p                 | 2 |
| <i>circRIMS1</i> | miR-6743-3p                 | 1 |
| <i>circRIMS1</i> | miR-6747-3p                 | 2 |
| <i>circRIMS1</i> | miR-6747-5p                 | 1 |
| <i>circRIMS1</i> | miR-675-3p                  | 1 |
| <i>circRIMS1</i> | miR-6751-5p/6803-5p         | 3 |
| <i>circRIMS1</i> | miR-6752-3p                 | 6 |
| <i>circRIMS1</i> | miR-6752-5p/6842-5p/7110-5p | 1 |
| <i>circRIMS1</i> | miR-6755-3p                 | 1 |
| <i>circRIMS1</i> | miR-6756-5p/6766-5p         | 1 |
| <i>circRIMS1</i> | miR-6757-3p                 | 2 |
| <i>circRIMS1</i> | miR-6759-5p                 | 1 |
| <i>circRIMS1</i> | miR-676-5p                  | 2 |
| <i>circRIMS1</i> | miR-6760-5p                 | 2 |
| <i>circRIMS1</i> | miR-6761-5p                 | 1 |

|                  |                     |   |
|------------------|---------------------|---|
| <i>circRIMS1</i> | miR-6762-3p         | 3 |
| <i>circRIMS1</i> | miR-6764-3p/6824-3p | 2 |
| <i>circRIMS1</i> | miR-6765-3p         | 2 |
| <i>circRIMS1</i> | miR-6769a-3p        | 1 |
| <i>circRIMS1</i> | miR-6770-3p         | 1 |
| <i>circRIMS1</i> | miR-6771-5p         | 2 |
| <i>circRIMS1</i> | miR-6772-3p         | 6 |
| <i>circRIMS1</i> | miR-6776-3p         | 2 |
| <i>circRIMS1</i> | miR-6777-3p         | 1 |
| <i>circRIMS1</i> | miR-6778-3p         | 1 |
| <i>circRIMS1</i> | miR-6779-3p         | 1 |
| <i>circRIMS1</i> | miR-6780a-3p        | 1 |
| <i>circRIMS1</i> | miR-6780b-3p        | 1 |
| <i>circRIMS1</i> | miR-6783-5p         | 1 |
| <i>circRIMS1</i> | miR-6789-5p         | 1 |
| <i>circRIMS1</i> | miR-6791-3p/6829-3p | 1 |
| <i>circRIMS1</i> | miR-6796-3p         | 1 |
| <i>circRIMS1</i> | miR-6796-5p         | 1 |
| <i>circRIMS1</i> | miR-6798-3p         | 1 |
| <i>circRIMS1</i> | miR-6799-5p         | 3 |
| <i>circRIMS1</i> | miR-6801-3p/6810-3p | 5 |
| <i>circRIMS1</i> | miR-6801-5p         | 1 |
| <i>circRIMS1</i> | miR-6803-3p         | 1 |
| <i>circRIMS1</i> | miR-6805-5p         | 2 |
| <i>circRIMS1</i> | miR-6810-5p         | 3 |
| <i>circRIMS1</i> | miR-6815-3p         | 2 |
| <i>circRIMS1</i> | miR-6815-5p/6865-5p | 1 |
| <i>circRIMS1</i> | miR-6816-3p         | 1 |
| <i>circRIMS1</i> | miR-6817-3p         | 2 |
| <i>circRIMS1</i> | miR-6824-5p         | 1 |
| <i>circRIMS1</i> | miR-6825-5p         | 4 |
| <i>circRIMS1</i> | miR-6826-3p         | 2 |
| <i>circRIMS1</i> | miR-6828-3p         | 2 |
| <i>circRIMS1</i> | miR-6830-5p         | 1 |
| <i>circRIMS1</i> | miR-6831-3p         | 2 |
| <i>circRIMS1</i> | miR-6833-5p         | 3 |
| <i>circRIMS1</i> | miR-6834-5p         | 1 |
| <i>circRIMS1</i> | miR-6835-5p         | 1 |

|                  |                     |   |
|------------------|---------------------|---|
| <i>circRIMS1</i> | miR-6837-3p         | 1 |
| <i>circRIMS1</i> | miR-6840-3p         | 1 |
| <i>circRIMS1</i> | miR-6841-3p         | 1 |
| <i>circRIMS1</i> | miR-6843-3p/6848-3p | 1 |
| <i>circRIMS1</i> | miR-6846-5p/6848-5p | 2 |
| <i>circRIMS1</i> | miR-6849-3p         | 1 |
| <i>circRIMS1</i> | miR-6851-3p         | 3 |
| <i>circRIMS1</i> | miR-6852-5p         | 2 |
| <i>circRIMS1</i> | miR-6856-3p         | 1 |
| <i>circRIMS1</i> | miR-6857-5p         | 3 |
| <i>circRIMS1</i> | miR-6861-3p         | 2 |
| <i>circRIMS1</i> | miR-6863            | 1 |
| <i>circRIMS1</i> | miR-6865-3p         | 2 |
| <i>circRIMS1</i> | miR-6867-5p         | 2 |
| <i>circRIMS1</i> | miR-6868-3p         | 3 |
| <i>circRIMS1</i> | miR-6868-5p         | 2 |
| <i>circRIMS1</i> | miR-6872-3p         | 1 |
| <i>circRIMS1</i> | miR-6873-5p         | 1 |
| <i>circRIMS1</i> | miR-6874-5p         | 1 |
| <i>circRIMS1</i> | miR-6878-3p         | 2 |
| <i>circRIMS1</i> | miR-6881-3p         | 1 |
| <i>circRIMS1</i> | miR-6881-5p         | 1 |
| <i>circRIMS1</i> | miR-6882-3p         | 4 |
| <i>circRIMS1</i> | miR-6886-3p         | 1 |
| <i>circRIMS1</i> | miR-6888-3p         | 1 |
| <i>circRIMS1</i> | miR-6888-5p         | 1 |
| <i>circRIMS1</i> | miR-6889-3p         | 1 |
| <i>circRIMS1</i> | miR-6890-3p         | 1 |
| <i>circRIMS1</i> | miR-6890-5p         | 1 |
| <i>circRIMS1</i> | miR-6892-3p         | 3 |
| <i>circRIMS1</i> | miR-6894-5p         | 2 |
| <i>circRIMS1</i> | miR-6895-3p         | 1 |
| <i>circRIMS1</i> | miR-6895-5p         | 3 |
| <i>circRIMS1</i> | miR-7106-3p         | 1 |
| <i>circRIMS1</i> | miR-7106-5p         | 3 |
| <i>circRIMS1</i> | miR-7108-5p         | 1 |
| <i>circRIMS1</i> | miR-7109-3p         | 1 |
| <i>circRIMS1</i> | miR-7109-5p         | 3 |

|                  |              |   |
|------------------|--------------|---|
| <i>circRIMS1</i> | miR-711      | 1 |
| <i>circRIMS1</i> | miR-7110-3p  | 2 |
| <i>circRIMS1</i> | miR-7111-3p  | 1 |
| <i>circRIMS1</i> | miR-7112-3p  | 1 |
| <i>circRIMS1</i> | miR-7114-5p  | 1 |
| <i>circRIMS1</i> | miR-7150     | 3 |
| <i>circRIMS1</i> | miR-7152-3p  | 2 |
| <i>circRIMS1</i> | miR-7152-5p  | 2 |
| <i>circRIMS1</i> | miR-7154-3p  | 2 |
| <i>circRIMS1</i> | miR-7154-5p  | 2 |
| <i>circRIMS1</i> | miR-7155-5p  | 4 |
| <i>circRIMS1</i> | miR-7156-3p  | 1 |
| <i>circRIMS1</i> | miR-7158-3p  | 1 |
| <i>circRIMS1</i> | miR-7160-3p  | 3 |
| <i>circRIMS1</i> | miR-759      | 1 |
| <i>circRIMS1</i> | miR-764      | 2 |
| <i>circRIMS1</i> | miR-7641     | 1 |
| <i>circRIMS1</i> | miR-765      | 2 |
| <i>circRIMS1</i> | miR-766-3p   | 4 |
| <i>circRIMS1</i> | miR-766-5p   | 2 |
| <i>circRIMS1</i> | miR-767-3p   | 4 |
| <i>circRIMS1</i> | miR-767-5p   | 1 |
| <i>circRIMS1</i> | miR-770-5p   | 1 |
| <i>circRIMS1</i> | miR-7847-3p  | 1 |
| <i>circRIMS1</i> | miR-7851-3p  | 1 |
| <i>circRIMS1</i> | miR-7854-3p  | 2 |
| <i>circRIMS1</i> | miR-7974     | 1 |
| <i>circRIMS1</i> | miR-7976     | 2 |
| <i>circRIMS1</i> | miR-7977     | 4 |
| <i>circRIMS1</i> | miR-8057     | 1 |
| <i>circRIMS1</i> | miR-8066     | 1 |
| <i>circRIMS1</i> | miR-8074     | 2 |
| <i>circRIMS1</i> | miR-8080     | 1 |
| <i>circRIMS1</i> | miR-873-5p.2 | 1 |
| <i>circRIMS1</i> | miR-874-3p   | 3 |
| <i>circRIMS1</i> | miR-874-5p   | 1 |
| <i>circRIMS1</i> | miR-875-3p   | 1 |
| <i>circRIMS1</i> | miR-876-3p   | 1 |

|                  |                              |   |
|------------------|------------------------------|---|
| <i>circRIMS1</i> | miR-885-3p                   | 1 |
| <i>circRIMS1</i> | miR-887-3p                   | 1 |
| <i>circRIMS1</i> | miR-887-5p                   | 1 |
| <i>circRIMS1</i> | miR-888-3p                   | 3 |
| <i>circRIMS1</i> | miR-890                      | 1 |
| <i>circRIMS1</i> | miR-891a-3p                  | 1 |
| <i>circRIMS1</i> | miR-891b                     | 1 |
| <i>circRIMS1</i> | miR-9-3p                     | 1 |
| <i>circRIMS1</i> | miR-9-5p                     | 2 |
| <i>circRIMS1</i> | miR-920/4300/5591-5p/6726-5p | 3 |
| <i>circRIMS1</i> | miR-922                      | 2 |
| <i>circRIMS1</i> | miR-93-3p                    | 5 |
| <i>circRIMS1</i> | miR-934                      | 1 |
| <i>circRIMS1</i> | miR-938                      | 1 |
| <i>circRIMS1</i> | miR-939-3p                   | 2 |
| <i>circRIMS1</i> | miR-939-5p/1343-5p           | 4 |
| <i>circRIMS1</i> | miR-943                      | 2 |
| <i>circRIMS1</i> | miR-95-5p                    | 1 |
| <i>circRIMS1</i> | miR-99-3p                    | 1 |
| <i>circRIMS1</i> | miR-3655                     | 1 |
| <i>circRIMS2</i> | miR-1-3p/206                 | 1 |
| <i>circRIMS2</i> | miR-1-5p                     | 1 |
| <i>circRIMS2</i> | miR-10a-3p                   | 1 |
| <i>circRIMS2</i> | miR-1178-3p                  | 1 |
| <i>circRIMS2</i> | miR-1179                     | 3 |
| <i>circRIMS2</i> | miR-1199-5p/6751-3p          | 1 |
| <i>circRIMS2</i> | miR-1206                     | 1 |
| <i>circRIMS2</i> | miR-1225-3p                  | 3 |
| <i>circRIMS2</i> | miR-1225-5p                  | 1 |
| <i>circRIMS2</i> | miR-1229-3p                  | 2 |
| <i>circRIMS2</i> | miR-1229-5p                  | 1 |
| <i>circRIMS2</i> | miR-1236-3p                  | 3 |
| <i>circRIMS2</i> | miR-1237-3p                  | 2 |
| <i>circRIMS2</i> | miR-1238-3p                  | 3 |
| <i>circRIMS2</i> | miR-1243                     | 3 |
| <i>circRIMS2</i> | miR-1246                     | 1 |
| <i>circRIMS2</i> | miR-1248                     | 2 |
| <i>circRIMS2</i> | miR-125-5p                   | 2 |

|                  |                     |   |
|------------------|---------------------|---|
| <i>circRIMS2</i> | miR-1250-3p         | 3 |
| <i>circRIMS2</i> | miR-1251-3p         | 2 |
| <i>circRIMS2</i> | miR-1252-3p         | 2 |
| <i>circRIMS2</i> | miR-1256            | 1 |
| <i>circRIMS2</i> | miR-1257            | 1 |
| <i>circRIMS2</i> | miR-1261            | 1 |
| <i>circRIMS2</i> | miR-1263            | 1 |
| <i>circRIMS2</i> | miR-1264            | 1 |
| <i>circRIMS2</i> | miR-1266-3p         | 1 |
| <i>circRIMS2</i> | miR-1267            | 1 |
| <i>circRIMS2</i> | miR-1269            | 5 |
| <i>circRIMS2</i> | miR-127-3p          | 1 |
| <i>circRIMS2</i> | miR-1270            | 4 |
| <i>circRIMS2</i> | miR-1275/4665-5p    | 1 |
| <i>circRIMS2</i> | miR-1277-5p         | 1 |
| <i>circRIMS2</i> | miR-1281            | 2 |
| <i>circRIMS2</i> | miR-1283            | 2 |
| <i>circRIMS2</i> | miR-1285-5p         | 1 |
| <i>circRIMS2</i> | miR-1288-5p         | 1 |
| <i>circRIMS2</i> | miR-1289            | 1 |
| <i>circRIMS2</i> | miR-1298-3p         | 2 |
| <i>circRIMS2</i> | miR-1298-5p         | 2 |
| <i>circRIMS2</i> | miR-1299            | 5 |
| <i>circRIMS2</i> | miR-1301-5p/6502-5p | 1 |
| <i>circRIMS2</i> | miR-1304-3p         | 3 |
| <i>circRIMS2</i> | miR-1305            | 1 |
| <i>circRIMS2</i> | miR-130b-5p         | 2 |
| <i>circRIMS2</i> | miR-133a-3p.1       | 2 |
| <i>circRIMS2</i> | miR-133a-3p.2/133b  | 2 |
| <i>circRIMS2</i> | miR-134-5p          | 1 |
| <i>circRIMS2</i> | miR-1343-3p         | 2 |
| <i>circRIMS2</i> | miR-135a-3p         | 1 |
| <i>circRIMS2</i> | miR-139-3p          | 2 |
| <i>circRIMS2</i> | miR-141-5p          | 5 |
| <i>circRIMS2</i> | miR-142-3p.1        | 2 |
| <i>circRIMS2</i> | miR-146a-3p         | 1 |
| <i>circRIMS2</i> | miR-148b-5p/6874-3p | 2 |
| <i>circRIMS2</i> | miR-150-3p          | 1 |

|                  |                     |   |
|------------------|---------------------|---|
| <i>circRIMS2</i> | miR-153-3p          | 2 |
| <i>circRIMS2</i> | miR-15b-3p          | 1 |
| <i>circRIMS2</i> | miR-16-2-3p/195-3p  | 2 |
| <i>circRIMS2</i> | miR-181-3p/4420     | 2 |
| <i>circRIMS2</i> | miR-183-5p.1        | 1 |
| <i>circRIMS2</i> | miR-185-3p          | 3 |
| <i>circRIMS2</i> | miR-186-5p          | 4 |
| <i>circRIMS2</i> | miR-19-5p           | 1 |
| <i>circRIMS2</i> | miR-192-3p          | 1 |
| <i>circRIMS2</i> | miR-197-5p/3132     | 2 |
| <i>circRIMS2</i> | miR-1973            | 1 |
| <i>circRIMS2</i> | miR-1976            | 4 |
| <i>circRIMS2</i> | miR-203b-3p         | 2 |
| <i>circRIMS2</i> | miR-203b-5p/6718-5p | 2 |
| <i>circRIMS2</i> | miR-204-5p/211-5p   | 3 |
| <i>circRIMS2</i> | miR-2052            | 1 |
| <i>circRIMS2</i> | miR-2113            | 2 |
| <i>circRIMS2</i> | miR-2114-3p         | 1 |
| <i>circRIMS2</i> | miR-2114-5p         | 1 |
| <i>circRIMS2</i> | miR-2115-3p         | 1 |
| <i>circRIMS2</i> | miR-2116-5p         | 3 |
| <i>circRIMS2</i> | miR-214-3p/3619-5p  | 1 |
| <i>circRIMS2</i> | miR-216a-5p         | 5 |
| <i>circRIMS2</i> | miR-216b-3p         | 1 |
| <i>circRIMS2</i> | miR-216b-5p         | 5 |
| <i>circRIMS2</i> | miR-22-5p           | 3 |
| <i>circRIMS2</i> | miR-222-5p          | 1 |
| <i>circRIMS2</i> | miR-223-3p          | 1 |
| <i>circRIMS2</i> | miR-24-5p           | 1 |
| <i>circRIMS2</i> | miR-2467-3p         | 1 |
| <i>circRIMS2</i> | miR-2467-5p         | 1 |
| <i>circRIMS2</i> | miR-26-3p           | 1 |
| <i>circRIMS2</i> | miR-26-5p           | 1 |
| <i>circRIMS2</i> | miR-2681-5p         | 2 |
| <i>circRIMS2</i> | miR-2682-3p/6781-3p | 1 |
| <i>circRIMS2</i> | miR-296-3p          | 1 |
| <i>circRIMS2</i> | miR-29a-5p          | 2 |
| <i>circRIMS2</i> | miR-29b-1-5p        | 2 |

|                  |                           |   |
|------------------|---------------------------|---|
| <i>circRIMS2</i> | miR-29b-2-5p              | 3 |
| <i>circRIMS2</i> | miR-301a-5p/301b-5p       | 2 |
| <i>circRIMS2</i> | miR-302a-5p               | 3 |
| <i>circRIMS2</i> | miR-302c-5p               | 2 |
| <i>circRIMS2</i> | miR-3064-3p               | 1 |
| <i>circRIMS2</i> | miR-3115                  | 1 |
| <i>circRIMS2</i> | miR-3117-5p               | 2 |
| <i>circRIMS2</i> | miR-3119                  | 2 |
| <i>circRIMS2</i> | miR-3120-3p               | 1 |
| <i>circRIMS2</i> | miR-3121-5p               | 4 |
| <i>circRIMS2</i> | miR-3123                  | 1 |
| <i>circRIMS2</i> | miR-3124-3p               | 3 |
| <i>circRIMS2</i> | miR-3126-3p               | 2 |
| <i>circRIMS2</i> | miR-3133                  | 4 |
| <i>circRIMS2</i> | miR-3134                  | 1 |
| <i>circRIMS2</i> | miR-3136-5p/4439          | 2 |
| <i>circRIMS2</i> | miR-3138                  | 2 |
| <i>circRIMS2</i> | miR-3143                  | 5 |
| <i>circRIMS2</i> | miR-3149                  | 2 |
| <i>circRIMS2</i> | miR-3151-3p               | 2 |
| <i>circRIMS2</i> | miR-3152-5p               | 2 |
| <i>circRIMS2</i> | miR-3156-5p               | 2 |
| <i>circRIMS2</i> | miR-3160-5p               | 1 |
| <i>circRIMS2</i> | miR-3163                  | 2 |
| <i>circRIMS2</i> | miR-3164                  | 1 |
| <i>circRIMS2</i> | miR-3165                  | 1 |
| <i>circRIMS2</i> | miR-3168                  | 2 |
| <i>circRIMS2</i> | miR-3169                  | 2 |
| <i>circRIMS2</i> | miR-3174                  | 1 |
| <i>circRIMS2</i> | miR-3180-5p               | 3 |
| <i>circRIMS2</i> | miR-3183/4723-3p/6769b-3p | 3 |
| <i>circRIMS2</i> | miR-3184-3p               | 1 |
| <i>circRIMS2</i> | miR-3186-5p               | 1 |
| <i>circRIMS2</i> | miR-3188                  | 1 |
| <i>circRIMS2</i> | miR-3190-3p               | 1 |
| <i>circRIMS2</i> | miR-3191-5p               | 2 |
| <i>circRIMS2</i> | miR-3192-3p               | 3 |
| <i>circRIMS2</i> | miR-3198/4309             | 1 |



|                  |                           |   |
|------------------|---------------------------|---|
| <i>circRIMS2</i> | miR-3200-5p               | 4 |
| <i>circRIMS2</i> | miR-323a-5p               | 1 |
| <i>circRIMS2</i> | miR-323b-5p/410-5p/494-5p | 1 |
| <i>circRIMS2</i> | miR-326                   | 2 |
| <i>circRIMS2</i> | miR-329-5p                | 2 |
| <i>circRIMS2</i> | miR-335-3p                | 1 |
| <i>circRIMS2</i> | miR-338-5p                | 1 |
| <i>circRIMS2</i> | miR-34a-3p                | 2 |
| <i>circRIMS2</i> | miR-34b-3p                | 3 |
| <i>circRIMS2</i> | miR-34c-3p                | 3 |
| <i>circRIMS2</i> | miR-3606-5p               | 1 |
| <i>circRIMS2</i> | miR-361-5p                | 4 |
| <i>circRIMS2</i> | miR-3611                  | 1 |
| <i>circRIMS2</i> | miR-3615                  | 2 |
| <i>circRIMS2</i> | miR-3617-3p               | 2 |
| <i>circRIMS2</i> | miR-362-5p/500b-5p        | 1 |
| <i>circRIMS2</i> | miR-3620-3p               | 1 |
| <i>circRIMS2</i> | miR-3646                  | 2 |
| <i>circRIMS2</i> | miR-365-3p                | 1 |
| <i>circRIMS2</i> | miR-3653-3p               | 3 |
| <i>circRIMS2</i> | miR-3653-5p               | 4 |
| <i>circRIMS2</i> | miR-3654                  | 3 |
| <i>circRIMS2</i> | miR-3663-5p               | 2 |
| <i>circRIMS2</i> | miR-3664-5p               | 2 |
| <i>circRIMS2</i> | miR-367-5p                | 1 |
| <i>circRIMS2</i> | miR-3675-3p               | 3 |
| <i>circRIMS2</i> | miR-3681-5p               | 1 |
| <i>circRIMS2</i> | miR-3689d/6851-5p         | 1 |
| <i>circRIMS2</i> | miR-3690                  | 1 |
| <i>circRIMS2</i> | miR-3692-3p               | 2 |
| <i>circRIMS2</i> | miR-3713                  | 1 |
| <i>circRIMS2</i> | miR-374b-3p               | 1 |
| <i>circRIMS2</i> | miR-374c-3p               | 1 |
| <i>circRIMS2</i> | miR-375                   | 3 |
| <i>circRIMS2</i> | miR-376-3p                | 2 |
| <i>circRIMS2</i> | miR-376b-5p/376c-5p       | 1 |
| <i>circRIMS2</i> | miR-377-5p/6086           | 2 |
| <i>circRIMS2</i> | miR-378-3p                | 2 |

|                  |                  |   |
|------------------|------------------|---|
| <i>circRIMS2</i> | miR-378j/6839-5p | 1 |
| <i>circRIMS2</i> | miR-382-3p       | 2 |
| <i>circRIMS2</i> | miR-383-5p.1     | 2 |
| <i>circRIMS2</i> | miR-383-5p.2     | 1 |
| <i>circRIMS2</i> | miR-3907         | 1 |
| <i>circRIMS2</i> | miR-3920         | 3 |
| <i>circRIMS2</i> | miR-3921/4653-5p | 2 |
| <i>circRIMS2</i> | miR-3925-5p      | 1 |
| <i>circRIMS2</i> | miR-3926         | 2 |
| <i>circRIMS2</i> | miR-3927-5p      | 1 |
| <i>circRIMS2</i> | miR-3937         | 1 |
| <i>circRIMS2</i> | miR-3975         | 1 |
| <i>circRIMS2</i> | miR-409-3p       | 2 |
| <i>circRIMS2</i> | miR-412-5p       | 1 |
| <i>circRIMS2</i> | miR-421          | 2 |
| <i>circRIMS2</i> | miR-423-3p       | 1 |
| <i>circRIMS2</i> | miR-425-3p       | 1 |
| <i>circRIMS2</i> | miR-4251         | 1 |
| <i>circRIMS2</i> | miR-4254         | 1 |
| <i>circRIMS2</i> | miR-4256         | 1 |
| <i>circRIMS2</i> | miR-4266         | 1 |
| <i>circRIMS2</i> | miR-4273/7156-5p | 2 |
| <i>circRIMS2</i> | miR-4279         | 6 |
| <i>circRIMS2</i> | miR-4281         | 2 |
| <i>circRIMS2</i> | miR-4289         | 1 |
| <i>circRIMS2</i> | miR-4291         | 3 |
| <i>circRIMS2</i> | miR-4294         | 1 |
| <i>circRIMS2</i> | miR-4297/5581-5p | 1 |
| <i>circRIMS2</i> | miR-4310/7157-5p | 3 |
| <i>circRIMS2</i> | miR-4312         | 1 |
| <i>circRIMS2</i> | miR-4317         | 2 |
| <i>circRIMS2</i> | miR-4318         | 2 |
| <i>circRIMS2</i> | miR-4324         | 1 |
| <i>circRIMS2</i> | miR-4329         | 1 |
| <i>circRIMS2</i> | miR-4423-3p      | 1 |
| <i>circRIMS2</i> | miR-4443         | 2 |
| <i>circRIMS2</i> | miR-4444         | 1 |
| <i>circRIMS2</i> | miR-4446-5p      | 3 |

|                  |                          |   |
|------------------|--------------------------|---|
| <i>circRIMS2</i> | miR-4454                 | 1 |
| <i>circRIMS2</i> | miR-4460                 | 1 |
| <i>circRIMS2</i> | miR-4474-3p              | 4 |
| <i>circRIMS2</i> | miR-448                  | 2 |
| <i>circRIMS2</i> | miR-4482-3p              | 2 |
| <i>circRIMS2</i> | miR-4485-5p              | 2 |
| <i>circRIMS2</i> | miR-4490                 | 1 |
| <i>circRIMS2</i> | miR-4502                 | 2 |
| <i>circRIMS2</i> | miR-4511                 | 2 |
| <i>circRIMS2</i> | miR-452-3p               | 4 |
| <i>circRIMS2</i> | miR-4520-3p              | 1 |
| <i>circRIMS2</i> | miR-4522                 | 2 |
| <i>circRIMS2</i> | miR-4527/6503-5p         | 2 |
| <i>circRIMS2</i> | miR-4531                 | 4 |
| <i>circRIMS2</i> | miR-4534/8082            | 1 |
| <i>circRIMS2</i> | miR-4539                 | 2 |
| <i>circRIMS2</i> | miR-4633-5p              | 1 |
| <i>circRIMS2</i> | miR-4638-3p              | 2 |
| <i>circRIMS2</i> | miR-4639-3p              | 1 |
| <i>circRIMS2</i> | miR-4640-5p              | 1 |
| <i>circRIMS2</i> | miR-4649-3p              | 1 |
| <i>circRIMS2</i> | miR-4659a-3p/4659b-3p    | 4 |
| <i>circRIMS2</i> | miR-4660                 | 1 |
| <i>circRIMS2</i> | miR-4661-3p              | 1 |
| <i>circRIMS2</i> | miR-4667-5p/4700-5p/8089 | 1 |
| <i>circRIMS2</i> | miR-4671-5p              | 1 |
| <i>circRIMS2</i> | miR-4677-3p              | 1 |
| <i>circRIMS2</i> | miR-4677-5p              | 2 |
| <i>circRIMS2</i> | miR-4679                 | 1 |
| <i>circRIMS2</i> | miR-4683                 | 2 |
| <i>circRIMS2</i> | miR-4691-5p/6792-3p      | 2 |
| <i>circRIMS2</i> | miR-4693-5p              | 1 |
| <i>circRIMS2</i> | miR-4695-3p              | 4 |
| <i>circRIMS2</i> | miR-4695-5p              | 4 |
| <i>circRIMS2</i> | miR-4697-3p              | 1 |
| <i>circRIMS2</i> | miR-4714-5p              | 2 |
| <i>circRIMS2</i> | miR-4727-3p              | 1 |
| <i>circRIMS2</i> | miR-4732-3p              | 2 |

|                  |                     |   |
|------------------|---------------------|---|
| <i>circRIMS2</i> | miR-4751            | 1 |
| <i>circRIMS2</i> | miR-4753-3p         | 4 |
| <i>circRIMS2</i> | miR-4755-5p/5006-3p | 5 |
| <i>circRIMS2</i> | miR-4759            | 2 |
| <i>circRIMS2</i> | miR-4762-3p         | 3 |
| <i>circRIMS2</i> | miR-4768-5p/6833-3p | 3 |
| <i>circRIMS2</i> | miR-4772-5p         | 2 |
| <i>circRIMS2</i> | miR-4774-3p         | 2 |
| <i>circRIMS2</i> | miR-4774-5p         | 1 |
| <i>circRIMS2</i> | miR-4776-3p         | 1 |
| <i>circRIMS2</i> | miR-4778-5p         | 2 |
| <i>circRIMS2</i> | miR-4779            | 4 |
| <i>circRIMS2</i> | miR-4781-3p         | 2 |
| <i>circRIMS2</i> | miR-4782-5p/5706    | 5 |
| <i>circRIMS2</i> | miR-4786-3p         | 3 |
| <i>circRIMS2</i> | miR-4793-5p         | 2 |
| <i>circRIMS2</i> | miR-4796-5p         | 1 |
| <i>circRIMS2</i> | miR-4798-5p         | 1 |
| <i>circRIMS2</i> | miR-4800-5p         | 2 |
| <i>circRIMS2</i> | miR-4802-5p         | 2 |
| <i>circRIMS2</i> | miR-483-3p.1        | 1 |
| <i>circRIMS2</i> | miR-485-5p          | 1 |
| <i>circRIMS2</i> | miR-488-5p          | 1 |
| <i>circRIMS2</i> | miR-489-5p          | 1 |
| <i>circRIMS2</i> | miR-490-5p          | 1 |
| <i>circRIMS2</i> | miR-494-3p          | 1 |
| <i>circRIMS2</i> | miR-499a-3p/499b-3p | 3 |
| <i>circRIMS2</i> | miR-5003-5p         | 1 |
| <i>circRIMS2</i> | miR-5004-5p         | 1 |
| <i>circRIMS2</i> | miR-5007-5p         | 2 |
| <i>circRIMS2</i> | miR-5009-5p/8058    | 5 |
| <i>circRIMS2</i> | miR-500a-5p         | 1 |
| <i>circRIMS2</i> | miR-501-5p          | 1 |
| <i>circRIMS2</i> | miR-5010-3p         | 2 |
| <i>circRIMS2</i> | miR-5011-5p         | 3 |
| <i>circRIMS2</i> | miR-505-3p.2        | 2 |
| <i>circRIMS2</i> | miR-506-5p          | 2 |
| <i>circRIMS2</i> | miR-5087            | 2 |

|                  |                                               |   |
|------------------|-----------------------------------------------|---|
| <i>circRIMS2</i> | miR-5096                                      | 1 |
| <i>circRIMS2</i> | miR-513b-5p                                   | 1 |
| <i>circRIMS2</i> | miR-513c-5p/514b-5p                           | 2 |
| <i>circRIMS2</i> | miR-514a-5p                                   | 2 |
| <i>circRIMS2</i> | miR-516a-5p                                   | 4 |
| <i>circRIMS2</i> | miR-516b-5p                                   | 5 |
| <i>circRIMS2</i> | miR-518c-5p                                   | 2 |
| <i>circRIMS2</i> | miR-5193                                      | 2 |
| <i>circRIMS2</i> | miR-5196-3p                                   | 2 |
| <i>circRIMS2</i> | miR-525-5p                                    | 1 |
| <i>circRIMS2</i> | miR-532-5p                                    | 2 |
| <i>circRIMS2</i> | miR-543                                       | 2 |
| <i>circRIMS2</i> | miR-544b                                      | 1 |
| <i>circRIMS2</i> | miR-545-3p                                    | 2 |
| <i>circRIMS2</i> | miR-548ao-5p/548ax                            | 1 |
| <i>circRIMS2</i> | miR-548av-3p                                  | 1 |
| <i>circRIMS2</i> | miR-548az-3p/548ar-3p/548a-3p/548e-3p/548f-3p | 2 |
| <i>circRIMS2</i> | miR-548b-3p                                   | 2 |
| <i>circRIMS2</i> | miR-5581-3p                                   | 2 |
| <i>circRIMS2</i> | miR-5582-3p                                   | 2 |
| <i>circRIMS2</i> | miR-5584-3p                                   | 2 |
| <i>circRIMS2</i> | miR-5585-3p                                   | 2 |
| <i>circRIMS2</i> | miR-5585-5p                                   | 1 |
| <i>circRIMS2</i> | miR-5588-3p                                   | 1 |
| <i>circRIMS2</i> | miR-562                                       | 1 |
| <i>circRIMS2</i> | miR-568                                       | 2 |
| <i>circRIMS2</i> | miR-5680                                      | 2 |
| <i>circRIMS2</i> | miR-5689                                      | 1 |
| <i>circRIMS2</i> | miR-5694                                      | 1 |
| <i>circRIMS2</i> | miR-5702                                      | 1 |
| <i>circRIMS2</i> | miR-580-5p                                    | 1 |
| <i>circRIMS2</i> | miR-584-5p                                    | 1 |
| <i>circRIMS2</i> | miR-587                                       | 6 |
| <i>circRIMS2</i> | miR-601                                       | 2 |
| <i>circRIMS2</i> | miR-605-5p                                    | 1 |
| <i>circRIMS2</i> | miR-6071                                      | 1 |
| <i>circRIMS2</i> | miR-6072/6891-3p                              | 1 |
| <i>circRIMS2</i> | miR-6073                                      | 2 |

|                  |             |   |
|------------------|-------------|---|
| <i>circRIMS2</i> | miR-6074    | 3 |
| <i>circRIMS2</i> | miR-6079    | 2 |
| <i>circRIMS2</i> | miR-610     | 2 |
| <i>circRIMS2</i> | miR-6128    | 4 |
| <i>circRIMS2</i> | miR-617     | 1 |
| <i>circRIMS2</i> | miR-623     | 3 |
| <i>circRIMS2</i> | miR-627-5p  | 1 |
| <i>circRIMS2</i> | miR-629-3p  | 5 |
| <i>circRIMS2</i> | miR-630     | 2 |
| <i>circRIMS2</i> | miR-637     | 1 |
| <i>circRIMS2</i> | miR-639     | 1 |
| <i>circRIMS2</i> | miR-642-3p  | 1 |
| <i>circRIMS2</i> | miR-643     | 1 |
| <i>circRIMS2</i> | miR-645     | 1 |
| <i>circRIMS2</i> | miR-6501-3p | 1 |
| <i>circRIMS2</i> | miR-6503-3p | 2 |
| <i>circRIMS2</i> | miR-6505-3p | 1 |
| <i>circRIMS2</i> | miR-6505-5p | 2 |
| <i>circRIMS2</i> | miR-6506-3p | 1 |
| <i>circRIMS2</i> | miR-6508-3p | 1 |
| <i>circRIMS2</i> | miR-6514-5p | 2 |
| <i>circRIMS2</i> | miR-6515-3p | 3 |
| <i>circRIMS2</i> | miR-6515-5p | 2 |
| <i>circRIMS2</i> | miR-6516-3p | 3 |
| <i>circRIMS2</i> | miR-653-3p  | 2 |
| <i>circRIMS2</i> | miR-655-5p  | 2 |
| <i>circRIMS2</i> | miR-660-3p  | 2 |
| <i>circRIMS2</i> | miR-664a-3p | 1 |
| <i>circRIMS2</i> | miR-670-3p  | 3 |
| <i>circRIMS2</i> | miR-670-5p  | 3 |
| <i>circRIMS2</i> | miR-671-5p  | 1 |
| <i>circRIMS2</i> | miR-6722-5p | 1 |
| <i>circRIMS2</i> | miR-6728-3p | 1 |
| <i>circRIMS2</i> | miR-6731-3p | 1 |
| <i>circRIMS2</i> | miR-6736-3p | 1 |
| <i>circRIMS2</i> | miR-6739-3p | 2 |
| <i>circRIMS2</i> | miR-6740-3p | 3 |
| <i>circRIMS2</i> | miR-6742-3p | 1 |

|                  |                             |   |
|------------------|-----------------------------|---|
| <i>circRIMS2</i> | miR-6749-3p                 | 2 |
| <i>circRIMS2</i> | miR-6749-5p                 | 1 |
| <i>circRIMS2</i> | miR-6751-5p/6803-5p         | 1 |
| <i>circRIMS2</i> | miR-6752-5p/6842-5p/7110-5p | 1 |
| <i>circRIMS2</i> | miR-6753-3p/7107-3p         | 2 |
| <i>circRIMS2</i> | miR-676-5p                  | 2 |
| <i>circRIMS2</i> | miR-6761-5p                 | 1 |
| <i>circRIMS2</i> | miR-6764-3p/6824-3p         | 2 |
| <i>circRIMS2</i> | miR-6765-5p                 | 1 |
| <i>circRIMS2</i> | miR-6771-5p                 | 1 |
| <i>circRIMS2</i> | miR-6780a-3p                | 3 |
| <i>circRIMS2</i> | miR-6807-5p                 | 3 |
| <i>circRIMS2</i> | miR-6809-3p                 | 3 |
| <i>circRIMS2</i> | miR-6817-3p                 | 2 |
| <i>circRIMS2</i> | miR-6819-3p/6877-3p         | 1 |
| <i>circRIMS2</i> | miR-6825-3p                 | 1 |
| <i>circRIMS2</i> | miR-6828-3p                 | 1 |
| <i>circRIMS2</i> | miR-6828-5p                 | 1 |
| <i>circRIMS2</i> | miR-6832-3p                 | 2 |
| <i>circRIMS2</i> | miR-6835-5p                 | 1 |
| <i>circRIMS2</i> | miR-6843-3p/6848-3p         | 3 |
| <i>circRIMS2</i> | miR-6844                    | 3 |
| <i>circRIMS2</i> | miR-6845-3p                 | 1 |
| <i>circRIMS2</i> | miR-6852-5p                 | 1 |
| <i>circRIMS2</i> | miR-6853-3p                 | 1 |
| <i>circRIMS2</i> | miR-6853-5p                 | 1 |
| <i>circRIMS2</i> | miR-6870-3p                 | 2 |
| <i>circRIMS2</i> | miR-6873-3p                 | 2 |
| <i>circRIMS2</i> | miR-6875-3p                 | 4 |
| <i>circRIMS2</i> | miR-6880-3p                 | 1 |
| <i>circRIMS2</i> | miR-6880-5p                 | 1 |
| <i>circRIMS2</i> | miR-6881-3p                 | 3 |
| <i>circRIMS2</i> | miR-6881-5p                 | 1 |
| <i>circRIMS2</i> | miR-6883-3p                 | 1 |
| <i>circRIMS2</i> | miR-6894-5p                 | 2 |
| <i>circRIMS2</i> | miR-7108-5p                 | 4 |
| <i>circRIMS2</i> | miR-7109-5p                 | 1 |
| <i>circRIMS2</i> | miR-7110-3p                 | 2 |

|                  |             |   |
|------------------|-------------|---|
| <i>circRIMS2</i> | miR-7111-3p | 3 |
| <i>circRIMS2</i> | miR-7150    | 1 |
| <i>circRIMS2</i> | miR-7151-5p | 2 |
| <i>circRIMS2</i> | miR-7152-3p | 2 |
| <i>circRIMS2</i> | miR-7154-3p | 2 |
| <i>circRIMS2</i> | miR-7155-5p | 1 |
| <i>circRIMS2</i> | miR-7158-3p | 2 |
| <i>circRIMS2</i> | miR-7158-5p | 1 |
| <i>circRIMS2</i> | miR-7159-3p | 2 |
| <i>circRIMS2</i> | miR-7159-5p | 2 |
| <i>circRIMS2</i> | miR-7161-3p | 3 |
| <i>circRIMS2</i> | miR-7162-3p | 1 |
| <i>circRIMS2</i> | miR-759     | 1 |
| <i>circRIMS2</i> | miR-764     | 1 |
| <i>circRIMS2</i> | miR-7641    | 2 |
| <i>circRIMS2</i> | miR-765     | 2 |
| <i>circRIMS2</i> | miR-766-5p  | 2 |
| <i>circRIMS2</i> | miR-767-3p  | 1 |
| <i>circRIMS2</i> | miR-7847-3p | 2 |
| <i>circRIMS2</i> | miR-7850-5p | 1 |
| <i>circRIMS2</i> | miR-8065    | 1 |
| <i>circRIMS2</i> | miR-8068    | 3 |
| <i>circRIMS2</i> | miR-8069    | 3 |
| <i>circRIMS2</i> | miR-8071    | 1 |
| <i>circRIMS2</i> | miR-8075    | 1 |
| <i>circRIMS2</i> | miR-8083    | 2 |
| <i>circRIMS2</i> | miR-876-3p  | 1 |
| <i>circRIMS2</i> | miR-885-3p  | 1 |
| <i>circRIMS2</i> | miR-888-3p  | 2 |
| <i>circRIMS2</i> | miR-890     | 2 |
| <i>circRIMS2</i> | miR-892-5p  | 2 |
| <i>circRIMS2</i> | miR-892a    | 2 |
| <i>circRIMS2</i> | miR-892b    | 2 |
| <i>circRIMS2</i> | miR-9-5p    | 3 |
| <i>circRIMS2</i> | miR-921     | 1 |
| <i>circRIMS2</i> | miR-922     | 1 |
| <i>circRIMS2</i> | miR-924     | 1 |
| <i>circRIMS2</i> | miR-937-5p  | 1 |



|                  |                       |   |
|------------------|-----------------------|---|
| <i>circRIMS2</i> | miR-939-3p            | 1 |
| <i>circRIMS2</i> | miR-942-5p            | 3 |
| <i>circRIMS2</i> | miR-943               | 2 |
| <i>circRIMS2</i> | miR-95-3p             | 1 |
| <i>circRIMS2</i> | let-7-5p/98-5p        | 4 |
| <i>circRIMS2</i> | let-7a-2-3p/let-7g-3p | 1 |
| <i>circRIMS2</i> | let-7c-3p             | 1 |
| <i>circRIMS2</i> | miR-100-3p            | 1 |
| <i>circRIMS2</i> | miR-101-3p.1          | 2 |
| <i>circRIMS2</i> | miR-101-3p.2          | 2 |
| <i>circRIMS2</i> | miR-105-5p            | 1 |
| <i>circRIMS2</i> | miR-106a-3p           | 1 |
| <i>circRIMS2</i> | miR-1200              | 5 |
| <i>circRIMS2</i> | miR-1202/3972         | 1 |
| <i>circRIMS2</i> | miR-1204              | 1 |
| <i>circRIMS2</i> | miR-122-3p            | 1 |
| <i>circRIMS2</i> | miR-122-5p            | 1 |
| <i>circRIMS2</i> | miR-1231              | 4 |
| <i>circRIMS2</i> | miR-1233-5p/6778-5p   | 3 |
| <i>circRIMS2</i> | miR-1234-3p/7107-5p   | 1 |
| <i>circRIMS2</i> | miR-124-3p.2/506-3p   | 1 |
| <i>circRIMS2</i> | miR-124-5p            | 1 |
| <i>circRIMS2</i> | miR-1244              | 1 |
| <i>circRIMS2</i> | miR-1245b-5p          | 1 |
| <i>circRIMS2</i> | miR-1251-5p           | 1 |
| <i>circRIMS2</i> | miR-1252-5p           | 2 |
| <i>circRIMS2</i> | miR-1253              | 2 |
| <i>circRIMS2</i> | miR-125b-1-3p         | 1 |
| <i>circRIMS2</i> | miR-125b-2-3p         | 1 |
| <i>circRIMS2</i> | miR-1265              | 1 |
| <i>circRIMS2</i> | miR-127-5p            | 1 |
| <i>circRIMS2</i> | miR-1272              | 1 |
| <i>circRIMS2</i> | miR-1273g-5p          | 2 |
| <i>circRIMS2</i> | miR-1276              | 1 |
| <i>circRIMS2</i> | miR-1279              | 2 |
| <i>circRIMS2</i> | miR-128-3p            | 2 |
| <i>circRIMS2</i> | miR-1287-3p           | 1 |
| <i>circRIMS2</i> | miR-1287-5p           | 2 |

|                  |                                     |   |
|------------------|-------------------------------------|---|
| <i>circRIMS2</i> | miR-1288-3p                         | 1 |
| <i>circRIMS2</i> | miR-129-5p                          | 3 |
| <i>circRIMS2</i> | miR-1290                            | 1 |
| <i>circRIMS2</i> | miR-1293/4483                       | 1 |
| <i>circRIMS2</i> | miR-1295a                           | 2 |
| <i>circRIMS2</i> | miR-1295b-3p                        | 1 |
| <i>circRIMS2</i> | miR-1296-3p                         | 1 |
| <i>circRIMS2</i> | miR-1302/4298                       | 3 |
| <i>circRIMS2</i> | miR-1303                            | 1 |
| <i>circRIMS2</i> | miR-1307-3p                         | 2 |
| <i>circRIMS2</i> | miR-1322                            | 1 |
| <i>circRIMS2</i> | miR-1323                            | 2 |
| <i>circRIMS2</i> | miR-134-3p                          | 2 |
| <i>circRIMS2</i> | miR-135-5p                          | 1 |
| <i>circRIMS2</i> | miR-136-5p                          | 2 |
| <i>circRIMS2</i> | miR-138-2-3p                        | 1 |
| <i>circRIMS2</i> | miR-139-5p                          | 3 |
| <i>circRIMS2</i> | miR-140-3p.1                        | 1 |
| <i>circRIMS2</i> | miR-140-5p                          | 2 |
| <i>circRIMS2</i> | miR-141-3p/200-3p                   | 3 |
| <i>circRIMS2</i> | miR-143-5p                          | 1 |
| <i>circRIMS2</i> | miR-144-3p                          | 2 |
| <i>circRIMS2</i> | miR-145-5p                          | 3 |
| <i>circRIMS2</i> | miR-147a                            | 2 |
| <i>circRIMS2</i> | miR-148a-5p                         | 1 |
| <i>circRIMS2</i> | miR-149-3p/4728-5p/6785-5p/6883-5p  | 2 |
| <i>circRIMS2</i> | miR-150-5p                          | 4 |
| <i>circRIMS2</i> | miR-153-5p                          | 2 |
| <i>circRIMS2</i> | miR-154-3p/487-3p                   | 2 |
| <i>circRIMS2</i> | miR-154-5p                          | 3 |
| <i>circRIMS2</i> | miR-155-3p                          | 3 |
| <i>circRIMS2</i> | miR-155-5p                          | 3 |
| <i>circRIMS2</i> | miR-1587/3620-5p                    | 1 |
| <i>circRIMS2</i> | miR-16-1-3p                         | 3 |
| <i>circRIMS2</i> | miR-17-5p/20-5p/93-5p/106-5p/519-3p | 2 |
| <i>circRIMS2</i> | miR-181-5p                          | 3 |
| <i>circRIMS2</i> | miR-181a-2-3p                       | 2 |
| <i>circRIMS2</i> | miR-182-3p                          | 3 |

|                  |                                 |   |
|------------------|---------------------------------|---|
| <i>circRIMS2</i> | miR-185-5p                      | 2 |
| <i>circRIMS2</i> | miR-188-5p                      | 2 |
| <i>circRIMS2</i> | miR-19-3p                       | 1 |
| <i>circRIMS2</i> | miR-1909-5p                     | 1 |
| <i>circRIMS2</i> | miR-1911-3p                     | 1 |
| <i>circRIMS2</i> | miR-1915-3p/6764-5p             | 1 |
| <i>circRIMS2</i> | miR-1915-5p                     | 1 |
| <i>circRIMS2</i> | miR-192-5p/215-5p               | 2 |
| <i>circRIMS2</i> | miR-193b-5p                     | 1 |
| <i>circRIMS2</i> | miR-194-5p                      | 2 |
| <i>circRIMS2</i> | miR-199-3p                      | 1 |
| <i>circRIMS2</i> | miR-200-3p/429                  | 3 |
| <i>circRIMS2</i> | miR-203a-5p                     | 2 |
| <i>circRIMS2</i> | miR-204-3p/4646-5p              | 2 |
| <i>circRIMS2</i> | miR-205-3p                      | 2 |
| <i>circRIMS2</i> | miR-205-5p                      | 1 |
| <i>circRIMS2</i> | miR-2110                        | 2 |
| <i>circRIMS2</i> | miR-2116-3p                     | 4 |
| <i>circRIMS2</i> | miR-212-5p                      | 2 |
| <i>circRIMS2</i> | miR-217                         | 2 |
| <i>circRIMS2</i> | miR-218-1-3p                    | 3 |
| <i>circRIMS2</i> | miR-218-2-3p                    | 3 |
| <i>circRIMS2</i> | miR-218-5p                      | 3 |
| <i>circRIMS2</i> | miR-219b-5p                     | 2 |
| <i>circRIMS2</i> | miR-223-5p                      | 1 |
| <i>circRIMS2</i> | miR-2276-3p                     | 1 |
| <i>circRIMS2</i> | miR-23-3p                       | 1 |
| <i>circRIMS2</i> | miR-23-5p                       | 2 |
| <i>circRIMS2</i> | miR-2355-3p                     | 2 |
| <i>circRIMS2</i> | miR-24-3p                       | 3 |
| <i>circRIMS2</i> | miR-2681-3p                     | 4 |
| <i>circRIMS2</i> | miR-27-3p                       | 1 |
| <i>circRIMS2</i> | miR-27b-5p                      | 3 |
| <i>circRIMS2</i> | miR-28-5p/708-5p                | 2 |
| <i>circRIMS2</i> | miR-299-3p                      | 3 |
| <i>circRIMS2</i> | miR-30-3p                       | 1 |
| <i>circRIMS2</i> | miR-30-5p                       | 1 |
| <i>circRIMS2</i> | miR-302-3p/372-3p/373-3p/520-3p | 1 |

|                  |                                              |   |
|------------------|----------------------------------------------|---|
| <i>circRIMS2</i> | miR-302c-3p.2/520-3p                         | 1 |
| <i>circRIMS2</i> | miR-30b-3p/1273h-5p/3689-3p/6779-5p/6780a-5p | 3 |
| <i>circRIMS2</i> | miR-30c-3p/6788-5p                           | 3 |
| <i>circRIMS2</i> | miR-31-3p                                    | 2 |
| <i>circRIMS2</i> | miR-3120-5p                                  | 5 |
| <i>circRIMS2</i> | miR-3121-3p                                  | 2 |
| <i>circRIMS2</i> | miR-3124-5p                                  | 2 |
| <i>circRIMS2</i> | miR-3135b                                    | 2 |
| <i>circRIMS2</i> | miR-3136-3p/7155-3p                          | 1 |
| <i>circRIMS2</i> | miR-3140-5p                                  | 2 |
| <i>circRIMS2</i> | miR-3145-3p                                  | 2 |
| <i>circRIMS2</i> | miR-3145-5p                                  | 2 |
| <i>circRIMS2</i> | miR-3147                                     | 1 |
| <i>circRIMS2</i> | miR-3150a-3p                                 | 2 |
| <i>circRIMS2</i> | miR-3150a-5p/3150b-5p                        | 1 |
| <i>circRIMS2</i> | miR-3151-5p                                  | 1 |
| <i>circRIMS2</i> | miR-3152-3p                                  | 2 |
| <i>circRIMS2</i> | miR-3154                                     | 3 |
| <i>circRIMS2</i> | miR-3157-5p                                  | 1 |
| <i>circRIMS2</i> | miR-3159                                     | 1 |
| <i>circRIMS2</i> | miR-3160-3p                                  | 1 |
| <i>circRIMS2</i> | miR-3161                                     | 4 |
| <i>circRIMS2</i> | miR-3173-3p/6891-5p                          | 2 |
| <i>circRIMS2</i> | miR-3179                                     | 3 |
| <i>circRIMS2</i> | miR-3182                                     | 2 |
| <i>circRIMS2</i> | miR-3185                                     | 2 |
| <i>circRIMS2</i> | miR-3186-3p                                  | 1 |
| <i>circRIMS2</i> | miR-3187-3p                                  | 1 |
| <i>circRIMS2</i> | miR-3189-3p                                  | 2 |
| <i>circRIMS2</i> | miR-3192-5p                                  | 2 |
| <i>circRIMS2</i> | miR-3193                                     | 1 |
| <i>circRIMS2</i> | miR-3199/8052                                | 1 |
| <i>circRIMS2</i> | miR-3200-3p                                  | 2 |
| <i>circRIMS2</i> | miR-3202                                     | 2 |
| <i>circRIMS2</i> | miR-323-3p                                   | 3 |
| <i>circRIMS2</i> | miR-323b-3p                                  | 1 |
| <i>circRIMS2</i> | miR-328-3p                                   | 1 |
| <i>circRIMS2</i> | miR-330-3p                                   | 2 |

|                  |                           |   |
|------------------|---------------------------|---|
| <i>circRIMS2</i> | miR-330-3p.2              | 1 |
| <i>circRIMS2</i> | miR-338-3p                | 1 |
| <i>circRIMS2</i> | miR-33a-3p                | 5 |
| <i>circRIMS2</i> | miR-340-5p                | 1 |
| <i>circRIMS2</i> | miR-345-3p                | 2 |
| <i>circRIMS2</i> | miR-3605-3p               | 1 |
| <i>circRIMS2</i> | miR-3607-3p               | 2 |
| <i>circRIMS2</i> | miR-3607-5p               | 2 |
| <i>circRIMS2</i> | miR-3613-3p               | 2 |
| <i>circRIMS2</i> | miR-3613-5p               | 1 |
| <i>circRIMS2</i> | miR-3622a-3p/3622b-3p     | 1 |
| <i>circRIMS2</i> | miR-363-5p/6745           | 1 |
| <i>circRIMS2</i> | miR-3652/4430             | 1 |
| <i>circRIMS2</i> | miR-3655                  | 2 |
| <i>circRIMS2</i> | miR-365a-5p/365b-5p       | 1 |
| <i>circRIMS2</i> | miR-3662                  | 3 |
| <i>circRIMS2</i> | miR-3667-5p               | 2 |
| <i>circRIMS2</i> | miR-3671                  | 1 |
| <i>circRIMS2</i> | miR-3677-3p               | 1 |
| <i>circRIMS2</i> | miR-3677-5p               | 2 |
| <i>circRIMS2</i> | miR-3680-3p               | 2 |
| <i>circRIMS2</i> | miR-3682-5p               | 3 |
| <i>circRIMS2</i> | miR-3688-5p               | 2 |
| <i>circRIMS2</i> | miR-369-3p                | 1 |
| <i>circRIMS2</i> | miR-3691-3p               | 1 |
| <i>circRIMS2</i> | miR-370-3p                | 1 |
| <i>circRIMS2</i> | miR-371-5p                | 2 |
| <i>circRIMS2</i> | miR-371b-5p/373-5p/616-5p | 2 |
| <i>circRIMS2</i> | miR-372-5p                | 2 |
| <i>circRIMS2</i> | miR-374-5p/655-3p         | 2 |
| <i>circRIMS2</i> | miR-374a-3p               | 3 |
| <i>circRIMS2</i> | miR-378a-5p               | 5 |
| <i>circRIMS2</i> | miR-382-5p                | 2 |
| <i>circRIMS2</i> | miR-3913-3p               | 4 |
| <i>circRIMS2</i> | miR-3914                  | 1 |
| <i>circRIMS2</i> | miR-3919                  | 2 |
| <i>circRIMS2</i> | miR-3923                  | 2 |
| <i>circRIMS2</i> | miR-3925-3p               | 2 |

|                  |                           |   |
|------------------|---------------------------|---|
| <i>circRIMS2</i> | miR-3929/4419b/4478       | 2 |
| <i>circRIMS2</i> | miR-3940-5p/4507          | 1 |
| <i>circRIMS2</i> | miR-3942-3p               | 1 |
| <i>circRIMS2</i> | miR-3973                  | 2 |
| <i>circRIMS2</i> | miR-409-5p                | 1 |
| <i>circRIMS2</i> | miR-411-5p.1              | 1 |
| <i>circRIMS2</i> | miR-411-5p.2              | 1 |
| <i>circRIMS2</i> | miR-412-3p/6754-3p        | 2 |
| <i>circRIMS2</i> | miR-4258                  | 1 |
| <i>circRIMS2</i> | miR-4260                  | 1 |
| <i>circRIMS2</i> | miR-4263                  | 4 |
| <i>circRIMS2</i> | miR-4265/4296/4322        | 2 |
| <i>circRIMS2</i> | miR-4268                  | 4 |
| <i>circRIMS2</i> | miR-4271/4725-3p/6780b-5p | 2 |
| <i>circRIMS2</i> | miR-4272                  | 4 |
| <i>circRIMS2</i> | miR-4274                  | 1 |
| <i>circRIMS2</i> | miR-4275                  | 5 |
| <i>circRIMS2</i> | miR-4282                  | 8 |
| <i>circRIMS2</i> | miR-4284                  | 3 |
| <i>circRIMS2</i> | miR-4286                  | 1 |
| <i>circRIMS2</i> | miR-4292/6791-5p          | 2 |
| <i>circRIMS2</i> | miR-4299                  | 2 |
| <i>circRIMS2</i> | miR-4303                  | 1 |
| <i>circRIMS2</i> | miR-4307                  | 5 |
| <i>circRIMS2</i> | miR-4308                  | 2 |
| <i>circRIMS2</i> | miR-4311                  | 1 |
| <i>circRIMS2</i> | miR-4320                  | 2 |
| <i>circRIMS2</i> | miR-4330                  | 1 |
| <i>circRIMS2</i> | miR-4422                  | 1 |
| <i>circRIMS2</i> | miR-4423-5p               | 1 |
| <i>circRIMS2</i> | miR-4425                  | 1 |
| <i>circRIMS2</i> | miR-4426/4647/4662b       | 2 |
| <i>circRIMS2</i> | miR-4427                  | 2 |
| <i>circRIMS2</i> | miR-4428                  | 2 |
| <i>circRIMS2</i> | miR-4433b-5p              | 1 |
| <i>circRIMS2</i> | miR-4434/4516/5703        | 4 |
| <i>circRIMS2</i> | miR-4435                  | 1 |
| <i>circRIMS2</i> | miR-4437                  | 1 |

|                  |                     |   |
|------------------|---------------------|---|
| <i>circRIMS2</i> | miR-4438            | 1 |
| <i>circRIMS2</i> | miR-4447/4472       | 1 |
| <i>circRIMS2</i> | miR-4448            | 4 |
| <i>circRIMS2</i> | miR-4449            | 1 |
| <i>circRIMS2</i> | miR-4450            | 1 |
| <i>circRIMS2</i> | miR-4453/4538       | 3 |
| <i>circRIMS2</i> | miR-4456            | 2 |
| <i>circRIMS2</i> | miR-4464/4748       | 1 |
| <i>circRIMS2</i> | miR-4474-5p         | 1 |
| <i>circRIMS2</i> | miR-4475            | 1 |
| <i>circRIMS2</i> | miR-4476/6876-5p    | 2 |
| <i>circRIMS2</i> | miR-4477a           | 3 |
| <i>circRIMS2</i> | miR-4477b           | 1 |
| <i>circRIMS2</i> | miR-4480            | 3 |
| <i>circRIMS2</i> | miR-4481/4745-5p    | 1 |
| <i>circRIMS2</i> | miR-4484            | 1 |
| <i>circRIMS2</i> | miR-4487            | 1 |
| <i>circRIMS2</i> | miR-4491/4657       | 3 |
| <i>circRIMS2</i> | miR-4494            | 1 |
| <i>circRIMS2</i> | miR-4495            | 1 |
| <i>circRIMS2</i> | miR-4504            | 1 |
| <i>circRIMS2</i> | miR-4505/5787       | 1 |
| <i>circRIMS2</i> | miR-450a-2-3p       | 1 |
| <i>circRIMS2</i> | miR-450b-3p/769-3p  | 1 |
| <i>circRIMS2</i> | miR-450b-5p         | 2 |
| <i>circRIMS2</i> | miR-4515            | 1 |
| <i>circRIMS2</i> | miR-4519            | 1 |
| <i>circRIMS2</i> | miR-452-5p/892-3p   | 1 |
| <i>circRIMS2</i> | miR-4521            | 1 |
| <i>circRIMS2</i> | miR-4524a-3p        | 3 |
| <i>circRIMS2</i> | miR-4524b-3p        | 1 |
| <i>circRIMS2</i> | miR-4530            | 1 |
| <i>circRIMS2</i> | miR-4532            | 1 |
| <i>circRIMS2</i> | miR-4533            | 2 |
| <i>circRIMS2</i> | miR-455-3p.2        | 1 |
| <i>circRIMS2</i> | miR-4633-3p/6500-5p | 3 |
| <i>circRIMS2</i> | miR-4635            | 3 |
| <i>circRIMS2</i> | miR-4638-5p         | 2 |

|                  |                     |   |
|------------------|---------------------|---|
| <i>circRIMS2</i> | miR-4642            | 1 |
| <i>circRIMS2</i> | miR-4645-5p/4673    | 1 |
| <i>circRIMS2</i> | miR-4646-3p         | 2 |
| <i>circRIMS2</i> | miR-4648            | 3 |
| <i>circRIMS2</i> | miR-4652-3p         | 2 |
| <i>circRIMS2</i> | miR-4654/4769-5p    | 3 |
| <i>circRIMS2</i> | miR-466             | 2 |
| <i>circRIMS2</i> | miR-4662-5p         | 1 |
| <i>circRIMS2</i> | miR-4665-3p         | 1 |
| <i>circRIMS2</i> | miR-4666b           | 2 |
| <i>circRIMS2</i> | miR-4668-3p         | 2 |
| <i>circRIMS2</i> | miR-4670-3p         | 2 |
| <i>circRIMS2</i> | miR-4674            | 1 |
| <i>circRIMS2</i> | miR-4678            | 2 |
| <i>circRIMS2</i> | miR-4680-3p         | 2 |
| <i>circRIMS2</i> | miR-4684-5p         | 3 |
| <i>circRIMS2</i> | miR-4694-5p         | 1 |
| <i>circRIMS2</i> | miR-4698            | 3 |
| <i>circRIMS2</i> | miR-4704-3p         | 2 |
| <i>circRIMS2</i> | miR-4704-5p         | 1 |
| <i>circRIMS2</i> | miR-4707-3p         | 1 |
| <i>circRIMS2</i> | miR-4709-3p         | 4 |
| <i>circRIMS2</i> | miR-4711-5p         | 1 |
| <i>circRIMS2</i> | miR-4712-3p         | 1 |
| <i>circRIMS2</i> | miR-4714-3p         | 3 |
| <i>circRIMS2</i> | miR-4715-3p         | 1 |
| <i>circRIMS2</i> | miR-4717-5p         | 1 |
| <i>circRIMS2</i> | miR-4719            | 2 |
| <i>circRIMS2</i> | miR-4722-3p/6727-3p | 2 |
| <i>circRIMS2</i> | miR-4724-5p         | 2 |
| <i>circRIMS2</i> | miR-4726-3p         | 1 |
| <i>circRIMS2</i> | miR-4728-3p         | 2 |
| <i>circRIMS2</i> | miR-4731-5p         | 2 |
| <i>circRIMS2</i> | miR-4732-5p         | 1 |
| <i>circRIMS2</i> | miR-4733-5p         | 3 |
| <i>circRIMS2</i> | miR-4735-5p         | 4 |
| <i>circRIMS2</i> | miR-4738-3p         | 1 |
| <i>circRIMS2</i> | miR-4739            | 1 |



|                  |                     |   |
|------------------|---------------------|---|
| <i>circRIMS2</i> | miR-4740-3p         | 1 |
| <i>circRIMS2</i> | miR-4740-5p         | 1 |
| <i>circRIMS2</i> | miR-4743-3p         | 2 |
| <i>circRIMS2</i> | miR-4746-3p         | 1 |
| <i>circRIMS2</i> | miR-4747-5p/5196-5p | 2 |
| <i>circRIMS2</i> | miR-4750-3p         | 1 |
| <i>circRIMS2</i> | miR-4755-3p         | 3 |
| <i>circRIMS2</i> | miR-4756-3p         | 2 |
| <i>circRIMS2</i> | miR-4757-5p/6744-3p | 2 |
| <i>circRIMS2</i> | miR-4760-3p         | 4 |
| <i>circRIMS2</i> | miR-4760-5p/8061    | 1 |
| <i>circRIMS2</i> | miR-4761-5p         | 1 |
| <i>circRIMS2</i> | miR-4762-5p         | 1 |
| <i>circRIMS2</i> | miR-4763-5p         | 2 |
| <i>circRIMS2</i> | miR-4764-3p         | 1 |
| <i>circRIMS2</i> | miR-4766-5p         | 1 |
| <i>circRIMS2</i> | miR-4769-3p/6817-5p | 2 |
| <i>circRIMS2</i> | miR-4772-3p         | 1 |
| <i>circRIMS2</i> | miR-4775            | 3 |
| <i>circRIMS2</i> | miR-4777-5p         | 1 |
| <i>circRIMS2</i> | miR-4795-5p         | 1 |
| <i>circRIMS2</i> | miR-4796-3p         | 2 |
| <i>circRIMS2</i> | miR-4803            | 3 |
| <i>circRIMS2</i> | miR-483-5p          | 1 |
| <i>circRIMS2</i> | miR-484/3155        | 1 |
| <i>circRIMS2</i> | miR-488-3p          | 2 |
| <i>circRIMS2</i> | miR-489-3p          | 3 |
| <i>circRIMS2</i> | miR-491-5p          | 1 |
| <i>circRIMS2</i> | miR-493-5p          | 1 |
| <i>circRIMS2</i> | miR-495-3p          | 2 |
| <i>circRIMS2</i> | miR-495-5p          | 2 |
| <i>circRIMS2</i> | miR-497-3p          | 1 |
| <i>circRIMS2</i> | miR-498             | 2 |
| <i>circRIMS2</i> | miR-499b-5p         | 1 |
| <i>circRIMS2</i> | miR-5000-3p         | 2 |
| <i>circRIMS2</i> | miR-5002-5p         | 1 |
| <i>circRIMS2</i> | miR-5003-3p         | 1 |
| <i>circRIMS2</i> | miR-5004-3p         | 2 |

|                  |                                         |   |
|------------------|-----------------------------------------|---|
| <i>circRIMS2</i> | miR-5006-5p                             | 1 |
| <i>circRIMS2</i> | miR-5007-3p                             | 2 |
| <i>circRIMS2</i> | miR-501-3p/502-3p                       | 2 |
| <i>circRIMS2</i> | miR-5011-3p                             | 2 |
| <i>circRIMS2</i> | miR-502-5p                              | 2 |
| <i>circRIMS2</i> | miR-504-3p                              | 3 |
| <i>circRIMS2</i> | miR-505-5p                              | 2 |
| <i>circRIMS2</i> | miR-507/557                             | 2 |
| <i>circRIMS2</i> | miR-508-5p                              | 2 |
| <i>circRIMS2</i> | miR-5089-3p                             | 1 |
| <i>circRIMS2</i> | miR-5089-5p                             | 1 |
| <i>circRIMS2</i> | miR-509-3-5p/509-5p/4418                | 2 |
| <i>circRIMS2</i> | miR-5095/7151-3p                        | 2 |
| <i>circRIMS2</i> | miR-510-3p                              | 2 |
| <i>circRIMS2</i> | miR-511-3p                              | 2 |
| <i>circRIMS2</i> | miR-511-5p                              | 4 |
| <i>circRIMS2</i> | miR-512-3p                              | 1 |
| <i>circRIMS2</i> | miR-513a-3p/513c-3p/3606-3p             | 4 |
| <i>circRIMS2</i> | miR-513a-5p                             | 1 |
| <i>circRIMS2</i> | miR-515-5p/519e-5p                      | 3 |
| <i>circRIMS2</i> | miR-517-5p                              | 1 |
| <i>circRIMS2</i> | miR-5186                                | 2 |
| <i>circRIMS2</i> | miR-5187-3p                             | 2 |
| <i>circRIMS2</i> | miR-5187-5p                             | 1 |
| <i>circRIMS2</i> | miR-518a-5p/527                         | 1 |
| <i>circRIMS2</i> | miR-518d-5p/519-5p                      | 1 |
| <i>circRIMS2</i> | miR-519-3p                              | 1 |
| <i>circRIMS2</i> | miR-5190                                | 1 |
| <i>circRIMS2</i> | miR-5192                                | 2 |
| <i>circRIMS2</i> | miR-5197-3p                             | 1 |
| <i>circRIMS2</i> | miR-519d-5p                             | 1 |
| <i>circRIMS2</i> | miR-520g-3p                             | 2 |
| <i>circRIMS2</i> | miR-524-3p/525-3p                       | 1 |
| <i>circRIMS2</i> | miR-532-3p                              | 4 |
| <i>circRIMS2</i> | miR-539-5p                              | 1 |
| <i>circRIMS2</i> | miR-542-3p                              | 1 |
| <i>circRIMS2</i> | miR-545-5p                              | 1 |
| <i>circRIMS2</i> | miR-548ac/548bb-3p/548d-3p/548h-3p/548z | 1 |

|                  |                                                                  |   |
|------------------|------------------------------------------------------------------|---|
| <i>circRIMS2</i> | miR-548ah-5p/3609                                                | 2 |
| <i>circRIMS2</i> | miR-548an                                                        | 1 |
| <i>circRIMS2</i> | miR-548ao-3p                                                     | 2 |
| <i>circRIMS2</i> | miR-548aq-3p/548am-3p/548aj-3p/548ah-3p/548ae-3p/548j-3p/548x-3p | 2 |
| <i>circRIMS2</i> | miR-548at-5p                                                     | 2 |
| <i>circRIMS2</i> | miR-548av-5p/548k/8054                                           | 2 |
| <i>circRIMS2</i> | miR-548aw                                                        | 1 |
| <i>circRIMS2</i> | miR-548ay-5p/548au-5p/548as-5p/548ar-3p/548aq-5p/548ap-5p/548am- | 2 |
| <i>circRIMS2</i> | miR-548c-3p                                                      | 4 |
| <i>circRIMS2</i> | miR-548e-5p                                                      | 1 |
| <i>circRIMS2</i> | miR-548g-3p                                                      | 2 |
| <i>circRIMS2</i> | miR-548l                                                         | 2 |
| <i>circRIMS2</i> | miR-548q                                                         | 2 |
| <i>circRIMS2</i> | miR-548s                                                         | 1 |
| <i>circRIMS2</i> | miR-548u/7161-5p                                                 | 1 |
| <i>circRIMS2</i> | miR-550b-3p                                                      | 2 |
| <i>circRIMS2</i> | miR-551-3p                                                       | 1 |
| <i>circRIMS2</i> | miR-552-5p                                                       | 1 |
| <i>circRIMS2</i> | miR-555                                                          | 1 |
| <i>circRIMS2</i> | miR-5571-5p                                                      | 5 |
| <i>circRIMS2</i> | miR-5572                                                         | 1 |
| <i>circRIMS2</i> | miR-558                                                          | 1 |
| <i>circRIMS2</i> | miR-5586-3p                                                      | 1 |
| <i>circRIMS2</i> | miR-5589-5p                                                      | 2 |
| <i>circRIMS2</i> | miR-561-3p                                                       | 2 |
| <i>circRIMS2</i> | miR-566                                                          | 1 |
| <i>circRIMS2</i> | miR-5681b                                                        | 2 |
| <i>circRIMS2</i> | miR-5687                                                         | 2 |
| <i>circRIMS2</i> | miR-5690                                                         | 2 |
| <i>circRIMS2</i> | miR-5692a                                                        | 5 |
| <i>circRIMS2</i> | miR-5692bc                                                       | 1 |
| <i>circRIMS2</i> | miR-5695                                                         | 1 |
| <i>circRIMS2</i> | miR-5696                                                         | 2 |
| <i>circRIMS2</i> | miR-5697                                                         | 1 |
| <i>circRIMS2</i> | miR-5700                                                         | 3 |
| <i>circRIMS2</i> | miR-5704                                                         | 2 |
| <i>circRIMS2</i> | miR-573/3616-5p                                                  | 2 |
| <i>circRIMS2</i> | miR-575/4676-5p                                                  | 1 |

|                  |                    |   |
|------------------|--------------------|---|
| <i>circRIMS2</i> | miR-576-3p         | 2 |
| <i>circRIMS2</i> | miR-576-5p         | 4 |
| <i>circRIMS2</i> | miR-579-3p         | 2 |
| <i>circRIMS2</i> | miR-579-5p         | 2 |
| <i>circRIMS2</i> | miR-580-3p         | 2 |
| <i>circRIMS2</i> | miR-581            | 3 |
| <i>circRIMS2</i> | miR-582-5p         | 2 |
| <i>circRIMS2</i> | miR-583            | 1 |
| <i>circRIMS2</i> | miR-584-3p         | 3 |
| <i>circRIMS2</i> | miR-588            | 1 |
| <i>circRIMS2</i> | miR-590-3p         | 3 |
| <i>circRIMS2</i> | miR-591            | 5 |
| <i>circRIMS2</i> | miR-593-3p         | 2 |
| <i>circRIMS2</i> | miR-600            | 3 |
| <i>circRIMS2</i> | miR-606            | 1 |
| <i>circRIMS2</i> | miR-607            | 3 |
| <i>circRIMS2</i> | miR-6077           | 2 |
| <i>circRIMS2</i> | miR-6078           | 1 |
| <i>circRIMS2</i> | miR-6083           | 1 |
| <i>circRIMS2</i> | miR-6084           | 2 |
| <i>circRIMS2</i> | miR-618            | 1 |
| <i>circRIMS2</i> | miR-619-3p         | 2 |
| <i>circRIMS2</i> | miR-619-5p/6506-5p | 2 |
| <i>circRIMS2</i> | miR-622            | 1 |
| <i>circRIMS2</i> | miR-624-3p         | 1 |
| <i>circRIMS2</i> | miR-626/6876-3p    | 2 |
| <i>circRIMS2</i> | miR-629-5p         | 1 |
| <i>circRIMS2</i> | miR-631/3661       | 3 |
| <i>circRIMS2</i> | miR-632/4288       | 4 |
| <i>circRIMS2</i> | miR-640            | 3 |
| <i>circRIMS2</i> | miR-641/3617-5p    | 1 |
| <i>circRIMS2</i> | miR-642a-5p        | 2 |
| <i>circRIMS2</i> | miR-642b-5p        | 1 |
| <i>circRIMS2</i> | miR-6501-5p        | 1 |
| <i>circRIMS2</i> | miR-6502-3p        | 1 |
| <i>circRIMS2</i> | miR-6504-3p        | 2 |
| <i>circRIMS2</i> | miR-6507-5p        | 2 |
| <i>circRIMS2</i> | miR-6508-5p/8067   | 3 |

|                  |                       |   |
|------------------|-----------------------|---|
| <i>circRIMS2</i> | miR-6512-5p           | 1 |
| <i>circRIMS2</i> | miR-6514-3p           | 1 |
| <i>circRIMS2</i> | miR-6516-5p           | 2 |
| <i>circRIMS2</i> | miR-653-5p            | 2 |
| <i>circRIMS2</i> | miR-654-5p            | 4 |
| <i>circRIMS2</i> | miR-656-5p            | 1 |
| <i>circRIMS2</i> | miR-659-3p            | 2 |
| <i>circRIMS2</i> | miR-663b              | 2 |
| <i>circRIMS2</i> | miR-668-5p            | 1 |
| <i>circRIMS2</i> | miR-6715a-3p          | 1 |
| <i>circRIMS2</i> | miR-6715b-3p          | 3 |
| <i>circRIMS2</i> | miR-6720-3p           | 1 |
| <i>circRIMS2</i> | miR-6720-5p           | 1 |
| <i>circRIMS2</i> | miR-6728-5p           | 1 |
| <i>circRIMS2</i> | miR-6729-3p           | 2 |
| <i>circRIMS2</i> | miR-6731-5p/8085      | 3 |
| <i>circRIMS2</i> | miR-6732-3p           | 1 |
| <i>circRIMS2</i> | miR-6740-5p           | 2 |
| <i>circRIMS2</i> | miR-6741-3p           | 1 |
| <i>circRIMS2</i> | miR-6742-5p           | 1 |
| <i>circRIMS2</i> | miR-6747-3p           | 2 |
| <i>circRIMS2</i> | miR-6755-3p           | 2 |
| <i>circRIMS2</i> | miR-6755-5p           | 1 |
| <i>circRIMS2</i> | miR-6756-5p/6766-5p   | 1 |
| <i>circRIMS2</i> | miR-6758-3p           | 2 |
| <i>circRIMS2</i> | miR-6759-3p           | 1 |
| <i>circRIMS2</i> | miR-6759-5p           | 2 |
| <i>circRIMS2</i> | miR-676-3p            | 4 |
| <i>circRIMS2</i> | miR-6760-5p           | 1 |
| <i>circRIMS2</i> | miR-6765-3p           | 1 |
| <i>circRIMS2</i> | miR-6768-3p           | 1 |
| <i>circRIMS2</i> | miR-6769a-5p/6769b-5p | 4 |
| <i>circRIMS2</i> | miR-6770-5p           | 2 |
| <i>circRIMS2</i> | miR-6772-3p           | 4 |
| <i>circRIMS2</i> | miR-6778-3p           | 4 |
| <i>circRIMS2</i> | miR-6782-3p           | 2 |
| <i>circRIMS2</i> | miR-6786-5p           | 2 |
| <i>circRIMS2</i> | miR-6787-3p           | 1 |

|                  |                     |   |
|------------------|---------------------|---|
| <i>circRIMS2</i> | miR-6789-3p         | 1 |
| <i>circRIMS2</i> | miR-6790-3p         | 1 |
| <i>circRIMS2</i> | miR-6791-3p/6829-3p | 4 |
| <i>circRIMS2</i> | miR-6796-3p         | 1 |
| <i>circRIMS2</i> | miR-6796-5p         | 2 |
| <i>circRIMS2</i> | miR-6798-3p         | 1 |
| <i>circRIMS2</i> | miR-6799-5p         | 2 |
| <i>circRIMS2</i> | miR-6810-5p         | 2 |
| <i>circRIMS2</i> | miR-6813-3p         | 2 |
| <i>circRIMS2</i> | miR-6814-5p         | 1 |
| <i>circRIMS2</i> | miR-6816-3p         | 2 |
| <i>circRIMS2</i> | miR-6818-3p         | 2 |
| <i>circRIMS2</i> | miR-6818-5p         | 2 |
| <i>circRIMS2</i> | miR-6821-3p         | 1 |
| <i>circRIMS2</i> | miR-6822-3p         | 2 |
| <i>circRIMS2</i> | miR-6823-5p         | 1 |
| <i>circRIMS2</i> | miR-6826-5p         | 1 |
| <i>circRIMS2</i> | miR-6832-5p         | 1 |
| <i>circRIMS2</i> | miR-6834-3p         | 2 |
| <i>circRIMS2</i> | miR-6836-3p         | 2 |
| <i>circRIMS2</i> | miR-6837-3p         | 2 |
| <i>circRIMS2</i> | miR-6838-3p         | 2 |
| <i>circRIMS2</i> | miR-6839-3p         | 1 |
| <i>circRIMS2</i> | miR-6840-3p         | 1 |
| <i>circRIMS2</i> | miR-6841-3p         | 1 |
| <i>circRIMS2</i> | miR-6841-5p         | 1 |
| <i>circRIMS2</i> | miR-6846-3p         | 1 |
| <i>circRIMS2</i> | miR-6847-3p         | 2 |
| <i>circRIMS2</i> | miR-6857-5p         | 2 |
| <i>circRIMS2</i> | miR-6858-3p         | 1 |
| <i>circRIMS2</i> | miR-6859-3p         | 1 |
| <i>circRIMS2</i> | miR-6863            | 1 |
| <i>circRIMS2</i> | miR-6871-5p         | 2 |
| <i>circRIMS2</i> | miR-6874-5p         | 2 |
| <i>circRIMS2</i> | miR-6878-3p         | 2 |
| <i>circRIMS2</i> | miR-6878-5p         | 3 |
| <i>circRIMS2</i> | miR-6882-5p         | 1 |
| <i>circRIMS2</i> | miR-6884-3p         | 3 |

|                  |              |   |
|------------------|--------------|---|
| <i>circRIMS2</i> | miR-6885-3p  | 1 |
| <i>circRIMS2</i> | miR-6888-3p  | 3 |
| <i>circRIMS2</i> | miR-6890-3p  | 2 |
| <i>circRIMS2</i> | miR-6892-5p  | 1 |
| <i>circRIMS2</i> | miR-6894-3p  | 1 |
| <i>circRIMS2</i> | miR-6895-3p  | 2 |
| <i>circRIMS2</i> | miR-7-3p     | 2 |
| <i>circRIMS2</i> | miR-7-5p     | 2 |
| <i>circRIMS2</i> | miR-7106-3p  | 1 |
| <i>circRIMS2</i> | miR-7106-5p  | 2 |
| <i>circRIMS2</i> | miR-7108-3p  | 1 |
| <i>circRIMS2</i> | miR-7112-3p  | 1 |
| <i>circRIMS2</i> | miR-7114-5p  | 3 |
| <i>circRIMS2</i> | miR-7515     | 3 |
| <i>circRIMS2</i> | miR-760      | 2 |
| <i>circRIMS2</i> | miR-766-3p   | 2 |
| <i>circRIMS2</i> | miR-7702     | 1 |
| <i>circRIMS2</i> | miR-7843-3p  | 1 |
| <i>circRIMS2</i> | miR-7844-5p  | 1 |
| <i>circRIMS2</i> | miR-7849-3p  | 1 |
| <i>circRIMS2</i> | miR-7851-3p  | 2 |
| <i>circRIMS2</i> | miR-7855-5p  | 5 |
| <i>circRIMS2</i> | miR-7973     | 3 |
| <i>circRIMS2</i> | miR-7978     | 2 |
| <i>circRIMS2</i> | miR-802      | 1 |
| <i>circRIMS2</i> | miR-8055     | 2 |
| <i>circRIMS2</i> | miR-8057     | 3 |
| <i>circRIMS2</i> | miR-8060     | 1 |
| <i>circRIMS2</i> | miR-8063     | 3 |
| <i>circRIMS2</i> | miR-8066     | 3 |
| <i>circRIMS2</i> | miR-8074     | 1 |
| <i>circRIMS2</i> | miR-8076     | 1 |
| <i>circRIMS2</i> | miR-8080     | 2 |
| <i>circRIMS2</i> | miR-8084     | 3 |
| <i>circRIMS2</i> | miR-873-3p   | 2 |
| <i>circRIMS2</i> | miR-873-5p.1 | 1 |
| <i>circRIMS2</i> | miR-876-5p   | 1 |
| <i>circRIMS2</i> | miR-889-5p   | 1 |

|                  |                                       |   |
|------------------|---------------------------------------|---|
| <i>circRIMS2</i> | miR-891a-3p                           | 2 |
| <i>circRIMS2</i> | miR-92a-2-5p                          | 4 |
| <i>circRIMS2</i> | miR-935                               | 2 |
| <i>circRIMS2</i> | miR-936                               | 1 |
| <i>circRIMS2</i> | miR-944                               | 3 |
| <i>circRIMS2</i> | miR-96-3p                             | 4 |
| <i>circRIMS2</i> | miR-99-3p                             | 1 |
| <i>circRIMS2</i> | let-7a-3p/let-7b-3p/let-7f-1-3p/98-3p | 1 |
| <i>circRIMS2</i> | let-7f-2-3p/1185-3p                   | 1 |
| <i>circRIMS2</i> | miR-10-5p                             | 2 |
| <i>circRIMS2</i> | miR-103a-2-5p                         | 2 |
| <i>circRIMS2</i> | miR-1183                              | 1 |
| <i>circRIMS2</i> | miR-1184                              | 1 |
| <i>circRIMS2</i> | miR-1193                              | 1 |
| <i>circRIMS2</i> | miR-1205                              | 1 |
| <i>circRIMS2</i> | miR-1207-3p                           | 1 |
| <i>circRIMS2</i> | miR-1207-5p/4763-3p                   | 1 |
| <i>circRIMS2</i> | miR-1224-5p                           | 2 |
| <i>circRIMS2</i> | miR-1226-3p                           | 2 |
| <i>circRIMS2</i> | miR-1228-5p                           | 1 |
| <i>circRIMS2</i> | miR-1247-5p                           | 1 |
| <i>circRIMS2</i> | miR-1249-5p/6797-5p                   | 3 |
| <i>circRIMS2</i> | miR-1254/3116                         | 1 |
| <i>circRIMS2</i> | miR-1255a/1255b-5p                    | 1 |
| <i>circRIMS2</i> | miR-1255b-2-3p                        | 1 |
| <i>circRIMS2</i> | miR-126-5p                            | 6 |
| <i>circRIMS2</i> | miR-1260a/1260b                       | 1 |
| <i>circRIMS2</i> | miR-1262/4701-3p/6736-5p              | 2 |
| <i>circRIMS2</i> | miR-1266-5p/4518                      | 1 |
| <i>circRIMS2</i> | miR-1273d                             | 1 |
| <i>circRIMS2</i> | miR-1273e                             | 1 |
| <i>circRIMS2</i> | miR-1273g-3p                          | 4 |
| <i>circRIMS2</i> | miR-1273h-3p                          | 2 |
| <i>circRIMS2</i> | miR-1278                              | 1 |
| <i>circRIMS2</i> | miR-1284                              | 1 |
| <i>circRIMS2</i> | miR-1286                              | 1 |
| <i>circRIMS2</i> | miR-1295b-5p/1912                     | 1 |
| <i>circRIMS2</i> | miR-1301-3p                           | 1 |



|                  |                      |   |
|------------------|----------------------|---|
| <i>circRIMS2</i> | miR-132-3p/212-3p    | 2 |
| <i>circRIMS2</i> | miR-133a-5p          | 2 |
| <i>circRIMS2</i> | miR-138-5p           | 2 |
| <i>circRIMS2</i> | miR-140-3p.2         | 1 |
| <i>circRIMS2</i> | miR-142-3p.2         | 1 |
| <i>circRIMS2</i> | miR-145-3p           | 2 |
| <i>circRIMS2</i> | miR-146-5p           | 1 |
| <i>circRIMS2</i> | miR-147b             | 1 |
| <i>circRIMS2</i> | miR-149-5p           | 2 |
| <i>circRIMS2</i> | miR-152-5p           | 3 |
| <i>circRIMS2</i> | miR-17-3p            | 1 |
| <i>circRIMS2</i> | miR-18-5p            | 3 |
| <i>circRIMS2</i> | miR-1825             | 1 |
| <i>circRIMS2</i> | miR-1827             | 1 |
| <i>circRIMS2</i> | miR-183-3p           | 1 |
| <i>circRIMS2</i> | miR-183-5p.2         | 2 |
| <i>circRIMS2</i> | miR-186-3p           | 1 |
| <i>circRIMS2</i> | miR-187-3p           | 1 |
| <i>circRIMS2</i> | miR-188-3p           | 1 |
| <i>circRIMS2</i> | miR-18a-3p           | 1 |
| <i>circRIMS2</i> | miR-190-5p           | 1 |
| <i>circRIMS2</i> | miR-1909-3p/6722-3p  | 1 |
| <i>circRIMS2</i> | miR-190a-3p          | 2 |
| <i>circRIMS2</i> | miR-1910-3p/6511a-5p | 1 |
| <i>circRIMS2</i> | miR-1914-5p          | 2 |
| <i>circRIMS2</i> | miR-193-3p           | 1 |
| <i>circRIMS2</i> | miR-194-3p           | 3 |
| <i>circRIMS2</i> | miR-196-5p           | 1 |
| <i>circRIMS2</i> | miR-197-3p           | 1 |
| <i>circRIMS2</i> | miR-1972             | 1 |
| <i>circRIMS2</i> | miR-199-5p           | 1 |
| <i>circRIMS2</i> | miR-200ab-5p         | 2 |
| <i>circRIMS2</i> | miR-200c-5p/550a-3p  | 3 |
| <i>circRIMS2</i> | miR-202-5p           | 4 |
| <i>circRIMS2</i> | miR-2053             | 1 |
| <i>circRIMS2</i> | miR-2054             | 3 |
| <i>circRIMS2</i> | miR-208-3p           | 2 |
| <i>circRIMS2</i> | miR-208-5p           | 2 |

|                  |                       |   |
|------------------|-----------------------|---|
| <i>circRIMS2</i> | miR-20b-3p            | 1 |
| <i>circRIMS2</i> | miR-21-5p/590-5p      | 1 |
| <i>circRIMS2</i> | miR-210-3p            | 1 |
| <i>circRIMS2</i> | miR-210-5p            | 1 |
| <i>circRIMS2</i> | miR-2115-5p           | 1 |
| <i>circRIMS2</i> | miR-2117              | 1 |
| <i>circRIMS2</i> | miR-214-5p            | 2 |
| <i>circRIMS2</i> | miR-215-3p            | 1 |
| <i>circRIMS2</i> | miR-22-3p             | 1 |
| <i>circRIMS2</i> | miR-221-5p/8073       | 1 |
| <i>circRIMS2</i> | miR-224-5p            | 2 |
| <i>circRIMS2</i> | miR-2276-5p           | 2 |
| <i>circRIMS2</i> | miR-2278              | 1 |
| <i>circRIMS2</i> | miR-2355-5p           | 1 |
| <i>circRIMS2</i> | miR-2392              | 1 |
| <i>circRIMS2</i> | miR-25-5p             | 2 |
| <i>circRIMS2</i> | miR-26b-3p            | 1 |
| <i>circRIMS2</i> | miR-298               | 1 |
| <i>circRIMS2</i> | miR-302b-5p/302d-5p   | 2 |
| <i>circRIMS2</i> | miR-3065-3p           | 1 |
| <i>circRIMS2</i> | miR-3074-3p           | 3 |
| <i>circRIMS2</i> | miR-3074-5p           | 2 |
| <i>circRIMS2</i> | miR-3122/3913-5p      | 2 |
| <i>circRIMS2</i> | miR-3125/3916/6859-5p | 3 |
| <i>circRIMS2</i> | miR-3126-5p           | 3 |
| <i>circRIMS2</i> | miR-3128              | 2 |
| <i>circRIMS2</i> | miR-3130-3p           | 2 |
| <i>circRIMS2</i> | miR-3130-5p/4482-5p   | 1 |
| <i>circRIMS2</i> | miR-3135a             | 1 |
| <i>circRIMS2</i> | miR-3137              | 1 |
| <i>circRIMS2</i> | miR-3140-3p           | 2 |
| <i>circRIMS2</i> | miR-3150b-3p          | 6 |
| <i>circRIMS2</i> | miR-3156-3p           | 1 |
| <i>circRIMS2</i> | miR-3157-3p           | 1 |
| <i>circRIMS2</i> | miR-3158-5p           | 1 |
| <i>circRIMS2</i> | miR-3162-3p           | 1 |
| <i>circRIMS2</i> | miR-3171              | 1 |
| <i>circRIMS2</i> | miR-3176/3922-3p      | 1 |

|                  |                                   |   |
|------------------|-----------------------------------|---|
| <i>circRIMS2</i> | miR-3190-5p                       | 1 |
| <i>circRIMS2</i> | miR-3197                          | 1 |
| <i>circRIMS2</i> | miR-32-3p                         | 1 |
| <i>circRIMS2</i> | miR-320                           | 1 |
| <i>circRIMS2</i> | miR-320e                          | 1 |
| <i>circRIMS2</i> | miR-324-3p/1913                   | 1 |
| <i>circRIMS2</i> | miR-331-3p                        | 1 |
| <i>circRIMS2</i> | miR-331-5p                        | 1 |
| <i>circRIMS2</i> | miR-337-3p                        | 4 |
| <i>circRIMS2</i> | miR-339-5p                        | 2 |
| <i>circRIMS2</i> | miR-340-3p/6827-3p                | 1 |
| <i>circRIMS2</i> | miR-342-3p                        | 1 |
| <i>circRIMS2</i> | miR-34b-5p/449c-5p                | 1 |
| <i>circRIMS2</i> | miR-3591-5p                       | 1 |
| <i>circRIMS2</i> | miR-3612                          | 3 |
| <i>circRIMS2</i> | miR-3614-3p                       | 1 |
| <i>circRIMS2</i> | miR-3614-5p                       | 1 |
| <i>circRIMS2</i> | miR-3621                          | 2 |
| <i>circRIMS2</i> | miR-3622b-5p                      | 1 |
| <i>circRIMS2</i> | miR-3650                          | 1 |
| <i>circRIMS2</i> | miR-3656                          | 2 |
| <i>circRIMS2</i> | miR-3658                          | 2 |
| <i>circRIMS2</i> | miR-3660/4526                     | 1 |
| <i>circRIMS2</i> | miR-3664-3p                       | 1 |
| <i>circRIMS2</i> | miR-3667-3p                       | 3 |
| <i>circRIMS2</i> | miR-3672/6864-3p                  | 1 |
| <i>circRIMS2</i> | miR-3678-3p                       | 2 |
| <i>circRIMS2</i> | miR-3679-3p                       | 1 |
| <i>circRIMS2</i> | miR-3680-5p                       | 2 |
| <i>circRIMS2</i> | miR-3682-3p                       | 3 |
| <i>circRIMS2</i> | miR-3685                          | 4 |
| <i>circRIMS2</i> | miR-3686                          | 3 |
| <i>circRIMS2</i> | miR-3688-3p                       | 1 |
| <i>circRIMS2</i> | miR-3689a-5p/3689b-5p/3689e/3689f | 1 |
| <i>circRIMS2</i> | miR-369-5p                        | 2 |
| <i>circRIMS2</i> | miR-374-5p                        | 3 |
| <i>circRIMS2</i> | miR-376c-3p                       | 2 |
| <i>circRIMS2</i> | miR-377-3p                        | 1 |

|                  |                                    |   |
|------------------|------------------------------------|---|
| <i>circRIMS2</i> | miR-379-5p                         | 1 |
| <i>circRIMS2</i> | miR-380-5p/563                     | 1 |
| <i>circRIMS2</i> | miR-381-3p                         | 1 |
| <i>circRIMS2</i> | miR-381-5p                         | 1 |
| <i>circRIMS2</i> | miR-383-3p                         | 1 |
| <i>circRIMS2</i> | miR-384                            | 4 |
| <i>circRIMS2</i> | miR-3912-5p                        | 1 |
| <i>circRIMS2</i> | miR-3915                           | 2 |
| <i>circRIMS2</i> | miR-3924                           | 1 |
| <i>circRIMS2</i> | miR-3927-3p/6831-5p                | 1 |
| <i>circRIMS2</i> | miR-3928-3p                        | 1 |
| <i>circRIMS2</i> | miR-3943                           | 1 |
| <i>circRIMS2</i> | miR-411-3p                         | 1 |
| <i>circRIMS2</i> | miR-425-5p                         | 1 |
| <i>circRIMS2</i> | miR-4252                           | 1 |
| <i>circRIMS2</i> | miR-4257                           | 1 |
| <i>circRIMS2</i> | miR-4259                           | 1 |
| <i>circRIMS2</i> | miR-4267                           | 2 |
| <i>circRIMS2</i> | miR-4269/6715b-5p                  | 1 |
| <i>circRIMS2</i> | miR-4280                           | 1 |
| <i>circRIMS2</i> | miR-4287/4685-3p                   | 3 |
| <i>circRIMS2</i> | miR-4293                           | 2 |
| <i>circRIMS2</i> | miR-4301                           | 1 |
| <i>circRIMS2</i> | miR-432-3p                         | 1 |
| <i>circRIMS2</i> | miR-432-5p                         | 2 |
| <i>circRIMS2</i> | miR-4323                           | 1 |
| <i>circRIMS2</i> | miR-4325                           | 1 |
| <i>circRIMS2</i> | miR-4327                           | 3 |
| <i>circRIMS2</i> | miR-433-3p                         | 1 |
| <i>circRIMS2</i> | miR-4417                           | 1 |
| <i>circRIMS2</i> | miR-4419a/4510/6127/6129/6130/6133 | 3 |
| <i>circRIMS2</i> | miR-4421/5699-3p                   | 2 |
| <i>circRIMS2</i> | miR-4432                           | 2 |
| <i>circRIMS2</i> | miR-4433a-3p                       | 2 |
| <i>circRIMS2</i> | miR-4433a-5p                       | 1 |
| <i>circRIMS2</i> | miR-4451                           | 1 |
| <i>circRIMS2</i> | miR-4452                           | 1 |
| <i>circRIMS2</i> | miR-4457                           | 1 |

|                  |                       |   |
|------------------|-----------------------|---|
| <i>circRIMS2</i> | miR-4459              | 2 |
| <i>circRIMS2</i> | miR-4462              | 1 |
| <i>circRIMS2</i> | miR-4463              | 2 |
| <i>circRIMS2</i> | miR-4468              | 1 |
| <i>circRIMS2</i> | miR-4469              | 3 |
| <i>circRIMS2</i> | miR-4473              | 1 |
| <i>circRIMS2</i> | miR-4499              | 2 |
| <i>circRIMS2</i> | miR-4501              | 2 |
| <i>circRIMS2</i> | miR-4503              | 2 |
| <i>circRIMS2</i> | miR-4509              | 1 |
| <i>circRIMS2</i> | miR-450a-1-3p         | 2 |
| <i>circRIMS2</i> | miR-4513/6855-3p      | 2 |
| <i>circRIMS2</i> | miR-4514/4692         | 1 |
| <i>circRIMS2</i> | miR-4517              | 3 |
| <i>circRIMS2</i> | miR-4520-2-3p         | 3 |
| <i>circRIMS2</i> | miR-4528              | 1 |
| <i>circRIMS2</i> | miR-4529-3p           | 3 |
| <i>circRIMS2</i> | miR-4537              | 1 |
| <i>circRIMS2</i> | miR-4540              | 2 |
| <i>circRIMS2</i> | miR-4639-5p           | 1 |
| <i>circRIMS2</i> | miR-4650-3p           | 1 |
| <i>circRIMS2</i> | miR-4650-5p           | 1 |
| <i>circRIMS2</i> | miR-4655-3p           | 1 |
| <i>circRIMS2</i> | miR-4659a-5p/4659b-5p | 2 |
| <i>circRIMS2</i> | miR-4663              | 2 |
| <i>circRIMS2</i> | miR-4666a-3p          | 1 |
| <i>circRIMS2</i> | miR-4671-3p           | 1 |
| <i>circRIMS2</i> | miR-4680-5p           | 1 |
| <i>circRIMS2</i> | miR-4684-3p           | 1 |
| <i>circRIMS2</i> | miR-4686              | 1 |
| <i>circRIMS2</i> | miR-4689/6858-5p      | 2 |
| <i>circRIMS2</i> | miR-4690-5p           | 1 |
| <i>circRIMS2</i> | miR-4691-3p           | 1 |
| <i>circRIMS2</i> | miR-4694-3p           | 1 |
| <i>circRIMS2</i> | miR-4699-5p           | 2 |
| <i>circRIMS2</i> | miR-4703-3p           | 1 |
| <i>circRIMS2</i> | miR-4711-3p           | 2 |
| <i>circRIMS2</i> | miR-4713-5p           | 2 |

|                  |                             |   |
|------------------|-----------------------------|---|
| <i>circRIMS2</i> | miR-4715-5p                 | 1 |
| <i>circRIMS2</i> | miR-4716-5p                 | 1 |
| <i>circRIMS2</i> | miR-4717-3p                 | 1 |
| <i>circRIMS2</i> | miR-4720-3p                 | 1 |
| <i>circRIMS2</i> | miR-4720-5p/4799-3p/5588-5p | 2 |
| <i>circRIMS2</i> | miR-4722-5p                 | 1 |
| <i>circRIMS2</i> | miR-4724-3p                 | 1 |
| <i>circRIMS2</i> | miR-4725-5p                 | 2 |
| <i>circRIMS2</i> | miR-4727-5p                 | 1 |
| <i>circRIMS2</i> | miR-4729                    | 3 |
| <i>circRIMS2</i> | miR-4733-3p                 | 2 |
| <i>circRIMS2</i> | miR-4736                    | 1 |
| <i>circRIMS2</i> | miR-4742-3p                 | 1 |
| <i>circRIMS2</i> | miR-4742-5p                 | 1 |
| <i>circRIMS2</i> | miR-4744                    | 1 |
| <i>circRIMS2</i> | miR-4749-3p                 | 1 |
| <i>circRIMS2</i> | miR-4752                    | 3 |
| <i>circRIMS2</i> | miR-4764-5p                 | 1 |
| <i>circRIMS2</i> | miR-4768-3p                 | 2 |
| <i>circRIMS2</i> | miR-4773                    | 1 |
| <i>circRIMS2</i> | miR-4778-3p                 | 1 |
| <i>circRIMS2</i> | miR-4780                    | 1 |
| <i>circRIMS2</i> | miR-4781-5p                 | 1 |
| <i>circRIMS2</i> | miR-4786-5p                 | 2 |
| <i>circRIMS2</i> | miR-4789-5p                 | 1 |
| <i>circRIMS2</i> | miR-4790-3p                 | 1 |
| <i>circRIMS2</i> | miR-4790-5p                 | 1 |
| <i>circRIMS2</i> | miR-4793-3p                 | 2 |
| <i>circRIMS2</i> | miR-4795-3p                 | 3 |
| <i>circRIMS2</i> | miR-4797-5p                 | 1 |
| <i>circRIMS2</i> | miR-4798-3p                 | 2 |
| <i>circRIMS2</i> | miR-4799-5p                 | 2 |
| <i>circRIMS2</i> | miR-4802-3p                 | 1 |
| <i>circRIMS2</i> | miR-4804-3p                 | 1 |
| <i>circRIMS2</i> | miR-483-3p.2                | 1 |
| <i>circRIMS2</i> | miR-486-5p                  | 2 |
| <i>circRIMS2</i> | miR-491-3p                  | 1 |
| <i>circRIMS2</i> | miR-493-3p                  | 1 |

|                  |                             |   |
|------------------|-----------------------------|---|
| <i>circRIMS2</i> | miR-496.1                   | 1 |
| <i>circRIMS2</i> | miR-496.2                   | 1 |
| <i>circRIMS2</i> | miR-4999-3p                 | 1 |
| <i>circRIMS2</i> | miR-499a-5p                 | 2 |
| <i>circRIMS2</i> | miR-5001-3p                 | 1 |
| <i>circRIMS2</i> | miR-5008-3p/6737-3p/7157-3p | 1 |
| <i>circRIMS2</i> | miR-5008-5p                 | 1 |
| <i>circRIMS2</i> | miR-500a-3p                 | 1 |
| <i>circRIMS2</i> | miR-500b-3p                 | 1 |
| <i>circRIMS2</i> | miR-504-5p.1                | 2 |
| <i>circRIMS2</i> | miR-505-3p.1                | 2 |
| <i>circRIMS2</i> | miR-5088-3p                 | 1 |
| <i>circRIMS2</i> | miR-5092                    | 1 |
| <i>circRIMS2</i> | miR-5094                    | 1 |
| <i>circRIMS2</i> | miR-5100                    | 3 |
| <i>circRIMS2</i> | miR-513b-3p                 | 1 |
| <i>circRIMS2</i> | miR-516a-3p/516b-3p/7162-5p | 1 |
| <i>circRIMS2</i> | miR-518-3p                  | 1 |
| <i>circRIMS2</i> | miR-5189-3p                 | 1 |
| <i>circRIMS2</i> | miR-520g-5p                 | 1 |
| <i>circRIMS2</i> | miR-522-3p                  | 1 |
| <i>circRIMS2</i> | miR-524-5p                  | 4 |
| <i>circRIMS2</i> | miR-544a                    | 1 |
| <i>circRIMS2</i> | miR-548ap-3p/548aa/548t-3p  | 1 |
| <i>circRIMS2</i> | miR-548as-3p                | 1 |
| <i>circRIMS2</i> | miR-548ay-3p/548at-3p       | 1 |
| <i>circRIMS2</i> | miR-554                     | 2 |
| <i>circRIMS2</i> | miR-556-3p                  | 1 |
| <i>circRIMS2</i> | miR-556-5p                  | 1 |
| <i>circRIMS2</i> | miR-5571-3p                 | 1 |
| <i>circRIMS2</i> | miR-5579-3p                 | 1 |
| <i>circRIMS2</i> | miR-5580-3p                 | 3 |
| <i>circRIMS2</i> | miR-5583-3p                 | 3 |
| <i>circRIMS2</i> | miR-5584-5p                 | 1 |
| <i>circRIMS2</i> | miR-5586-5p                 | 1 |
| <i>circRIMS2</i> | miR-5587-5p                 | 3 |
| <i>circRIMS2</i> | miR-5589-3p                 | 2 |
| <i>circRIMS2</i> | miR-5590-5p                 | 2 |

|                  |                  |   |
|------------------|------------------|---|
| <i>circRIMS2</i> | miR-567          | 1 |
| <i>circRIMS2</i> | miR-569          | 1 |
| <i>circRIMS2</i> | miR-5693         | 3 |
| <i>circRIMS2</i> | miR-570-3p       | 1 |
| <i>circRIMS2</i> | miR-5701         | 3 |
| <i>circRIMS2</i> | miR-578          | 1 |
| <i>circRIMS2</i> | miR-582-3p       | 1 |
| <i>circRIMS2</i> | miR-589-5p       | 1 |
| <i>circRIMS2</i> | miR-595          | 2 |
| <i>circRIMS2</i> | miR-596          | 2 |
| <i>circRIMS2</i> | miR-597-3p       | 3 |
| <i>circRIMS2</i> | miR-597-5p       | 2 |
| <i>circRIMS2</i> | miR-604          | 1 |
| <i>circRIMS2</i> | miR-6087         | 1 |
| <i>circRIMS2</i> | miR-6089         | 1 |
| <i>circRIMS2</i> | miR-6126         | 1 |
| <i>circRIMS2</i> | miR-6131         | 2 |
| <i>circRIMS2</i> | miR-6132/6836-5p | 1 |
| <i>circRIMS2</i> | miR-616-3p       | 1 |
| <i>circRIMS2</i> | miR-6165         | 1 |
| <i>circRIMS2</i> | miR-635/6774-5p  | 1 |
| <i>circRIMS2</i> | miR-648          | 1 |
| <i>circRIMS2</i> | miR-6499-3p      | 1 |
| <i>circRIMS2</i> | miR-6500-3p      | 1 |
| <i>circRIMS2</i> | miR-651-3p       | 1 |
| <i>circRIMS2</i> | miR-6510-5p      | 1 |
| <i>circRIMS2</i> | miR-6511-3p      | 1 |
| <i>circRIMS2</i> | miR-6513-5p      | 2 |
| <i>circRIMS2</i> | miR-654-3p       | 1 |
| <i>circRIMS2</i> | miR-656-3p       | 1 |
| <i>circRIMS2</i> | miR-658          | 1 |
| <i>circRIMS2</i> | miR-661          | 1 |
| <i>circRIMS2</i> | miR-664a-5p/4794 | 2 |
| <i>circRIMS2</i> | miR-665          | 1 |
| <i>circRIMS2</i> | miR-6716-5p      | 1 |
| <i>circRIMS2</i> | miR-6719-3p      | 1 |
| <i>circRIMS2</i> | miR-6723-5p      | 2 |
| <i>circRIMS2</i> | miR-6730-3p      | 1 |



|                  |                     |   |
|------------------|---------------------|---|
| <i>circRIMS2</i> | miR-6734-3p         | 3 |
| <i>circRIMS2</i> | miR-6738-3p         | 1 |
| <i>circRIMS2</i> | miR-6741-5p         | 2 |
| <i>circRIMS2</i> | miR-6744-5p         | 1 |
| <i>circRIMS2</i> | miR-6748-3p         | 2 |
| <i>circRIMS2</i> | miR-6750-5p/6822-5p | 1 |
| <i>circRIMS2</i> | miR-6753-5p         | 2 |
| <i>circRIMS2</i> | miR-6757-3p         | 3 |
| <i>circRIMS2</i> | miR-6762-3p         | 1 |
| <i>circRIMS2</i> | miR-6769a-3p        | 1 |
| <i>circRIMS2</i> | miR-6771-3p         | 1 |
| <i>circRIMS2</i> | miR-6773-3p         | 1 |
| <i>circRIMS2</i> | miR-6774-3p         | 1 |
| <i>circRIMS2</i> | miR-6776-5p         | 2 |
| <i>circRIMS2</i> | miR-6780b-3p        | 1 |
| <i>circRIMS2</i> | miR-6783-5p         | 1 |
| <i>circRIMS2</i> | miR-6784-3p/6862-3p | 1 |
| <i>circRIMS2</i> | miR-6794-3p         | 1 |
| <i>circRIMS2</i> | miR-6798-5p         | 1 |
| <i>circRIMS2</i> | miR-6801-3p/6810-3p | 1 |
| <i>circRIMS2</i> | miR-6801-5p         | 1 |
| <i>circRIMS2</i> | miR-6802-3p         | 1 |
| <i>circRIMS2</i> | miR-6803-3p         | 1 |
| <i>circRIMS2</i> | miR-6811-3p         | 2 |
| <i>circRIMS2</i> | miR-6815-3p         | 2 |
| <i>circRIMS2</i> | miR-6815-5p/6865-5p | 2 |
| <i>circRIMS2</i> | miR-6831-3p         | 2 |
| <i>circRIMS2</i> | miR-6833-5p         | 3 |
| <i>circRIMS2</i> | miR-6847-5p         | 1 |
| <i>circRIMS2</i> | miR-6849-3p         | 1 |
| <i>circRIMS2</i> | miR-6856-3p         | 1 |
| <i>circRIMS2</i> | miR-6857-3p         | 2 |
| <i>circRIMS2</i> | miR-6861-5p         | 2 |
| <i>circRIMS2</i> | miR-6864-5p         | 1 |
| <i>circRIMS2</i> | miR-6865-3p         | 1 |
| <i>circRIMS2</i> | miR-6866-5p         | 1 |
| <i>circRIMS2</i> | miR-6867-3p         | 2 |
| <i>circRIMS2</i> | miR-6867-5p         | 1 |

|                  |              |   |
|------------------|--------------|---|
| <i>circRIMS2</i> | miR-6868-3p  | 3 |
| <i>circRIMS2</i> | miR-6868-5p  | 2 |
| <i>circRIMS2</i> | miR-6869-5p  | 1 |
| <i>circRIMS2</i> | miR-6882-3p  | 1 |
| <i>circRIMS2</i> | miR-6886-3p  | 1 |
| <i>circRIMS2</i> | miR-6888-5p  | 5 |
| <i>circRIMS2</i> | miR-6889-3p  | 1 |
| <i>circRIMS2</i> | miR-6892-3p  | 2 |
| <i>circRIMS2</i> | miR-708-3p   | 1 |
| <i>circRIMS2</i> | miR-7109-3p  | 3 |
| <i>circRIMS2</i> | miR-7113-3p  | 3 |
| <i>circRIMS2</i> | miR-7152-5p  | 2 |
| <i>circRIMS2</i> | miR-7153-3p  | 3 |
| <i>circRIMS2</i> | miR-7154-5p  | 1 |
| <i>circRIMS2</i> | miR-7156-3p  | 1 |
| <i>circRIMS2</i> | miR-7160-5p  | 2 |
| <i>circRIMS2</i> | miR-744-3p   | 1 |
| <i>circRIMS2</i> | miR-758-5p   | 1 |
| <i>circRIMS2</i> | miR-767-5p   | 2 |
| <i>circRIMS2</i> | miR-769-5p   | 2 |
| <i>circRIMS2</i> | miR-770-5p   | 2 |
| <i>circRIMS2</i> | miR-7703     | 1 |
| <i>circRIMS2</i> | miR-7845-5p  | 2 |
| <i>circRIMS2</i> | miR-7856-5p  | 2 |
| <i>circRIMS2</i> | miR-7975     | 1 |
| <i>circRIMS2</i> | miR-7977     | 2 |
| <i>circRIMS2</i> | miR-8070     | 3 |
| <i>circRIMS2</i> | miR-8077     | 2 |
| <i>circRIMS2</i> | miR-8087     | 2 |
| <i>circRIMS2</i> | miR-873-5p.2 | 1 |
| <i>circRIMS2</i> | miR-874-3p   | 1 |
| <i>circRIMS2</i> | miR-877-5p   | 1 |
| <i>circRIMS2</i> | miR-885-5p   | 1 |
| <i>circRIMS2</i> | miR-887-5p   | 2 |
| <i>circRIMS2</i> | miR-888-5p   | 1 |
| <i>circRIMS2</i> | miR-889-3p   | 1 |
| <i>circRIMS2</i> | miR-9-3p     | 1 |
| <i>circRIMS2</i> | miR-933      | 1 |

|                  |                         |   |
|------------------|-------------------------|---|
| <i>circRIMS2</i> | miR-938                 | 1 |
| <i>circRIMS2</i> | miR-940/6808-5p/6893-5p | 1 |
| <i>circRIMS2</i> | miR-95-5p               | 1 |
| <i>circRIMS2</i> | miR-9500                | 1 |
| <i>circRIMS2</i> | miR-1185-5p             | 1 |
| <i>circRIMS2</i> | miR-1208                | 2 |
| <i>circRIMS2</i> | miR-1268a/1268b         | 1 |
| <i>circRIMS2</i> | miR-1282                | 1 |
| <i>circRIMS2</i> | miR-1324                | 1 |
| <i>circRIMS2</i> | miR-138-1-3p            | 1 |
| <i>circRIMS2</i> | miR-1468-5p             | 1 |
| <i>circRIMS2</i> | miR-1470                | 1 |
| <i>circRIMS2</i> | miR-1537-3p             | 1 |
| <i>circRIMS2</i> | miR-182-5p              | 2 |
| <i>circRIMS2</i> | miR-187-5p              | 1 |
| <i>circRIMS2</i> | miR-198                 | 1 |
| <i>circRIMS2</i> | miR-20a-3p              | 2 |
| <i>circRIMS2</i> | miR-3127-3p/6756-3p     | 1 |
| <i>circRIMS2</i> | miR-3195                | 1 |
| <i>circRIMS2</i> | miR-33-5p               | 1 |
| <i>circRIMS2</i> | miR-339-3p              | 1 |
| <i>circRIMS2</i> | miR-346                 | 2 |
| <i>circRIMS2</i> | miR-3605-5p             | 1 |
| <i>circRIMS2</i> | miR-3663-3p             | 1 |
| <i>circRIMS2</i> | miR-3668                | 1 |
| <i>circRIMS2</i> | miR-3674                | 1 |
| <i>circRIMS2</i> | miR-3692-5p             | 1 |
| <i>circRIMS2</i> | miR-378g                | 1 |
| <i>circRIMS2</i> | miR-380-3p              | 1 |
| <i>circRIMS2</i> | miR-3922-5p             | 1 |
| <i>circRIMS2</i> | miR-3938                | 1 |
| <i>circRIMS2</i> | miR-4277                | 1 |
| <i>circRIMS2</i> | miR-4302                | 1 |
| <i>circRIMS2</i> | miR-4314                | 1 |
| <i>circRIMS2</i> | miR-4315                | 1 |
| <i>circRIMS2</i> | miR-4436b-5p            | 2 |
| <i>circRIMS2</i> | miR-4486                | 1 |
| <i>circRIMS2</i> | miR-4641                | 1 |

|                  |                                      |   |
|------------------|--------------------------------------|---|
| <i>circRIMS2</i> | miR-4667-3p                          | 1 |
| <i>circRIMS2</i> | miR-4713-3p                          | 1 |
| <i>circRIMS2</i> | miR-4777-3p                          | 1 |
| <i>circRIMS2</i> | miR-509-3p                           | 1 |
| <i>circRIMS2</i> | miR-5579-5p                          | 1 |
| <i>circRIMS2</i> | miR-5707                             | 1 |
| <i>circRIMS2</i> | miR-585-3p                           | 1 |
| <i>circRIMS2</i> | miR-592                              | 1 |
| <i>circRIMS2</i> | miR-593-5p                           | 1 |
| <i>circRIMS2</i> | miR-599                              | 1 |
| <i>circRIMS2</i> | miR-6068                             | 1 |
| <i>circRIMS2</i> | miR-6069                             | 1 |
| <i>circRIMS2</i> | miR-612/1285-3p/3187-5p/5189-5p/6860 | 1 |
| <i>circRIMS2</i> | miR-624-5p                           | 1 |
| <i>circRIMS2</i> | miR-627-3p                           | 1 |
| <i>circRIMS2</i> | miR-628-5p                           | 1 |
| <i>circRIMS2</i> | miR-636                              | 1 |
| <i>circRIMS2</i> | miR-638                              | 1 |
| <i>circRIMS2</i> | miR-647                              | 2 |
| <i>circRIMS2</i> | miR-6509-3p                          | 2 |
| <i>circRIMS2</i> | miR-6717-5p                          | 1 |
| <i>circRIMS2</i> | miR-6733-3p                          | 1 |
| <i>circRIMS2</i> | miR-6743-3p                          | 1 |
| <i>circRIMS2</i> | miR-6760-3p                          | 2 |
| <i>circRIMS2</i> | miR-6767-5p                          | 1 |
| <i>circRIMS2</i> | miR-6795-3p                          | 1 |
| <i>circRIMS2</i> | miR-6800-3p                          | 1 |
| <i>circRIMS2</i> | miR-6826-3p                          | 1 |
| <i>circRIMS2</i> | miR-6842-3p                          | 2 |
| <i>circRIMS2</i> | miR-6886-5p                          | 1 |
| <i>circRIMS2</i> | miR-6887-3p                          | 1 |
| <i>circRIMS2</i> | miR-758-3p                           | 1 |
| <i>circRIMS2</i> | miR-7705                             | 1 |
| <i>circRIMS2</i> | miR-7852-3p                          | 1 |
| <i>circRIMS2</i> | miR-8053                             | 1 |
| <i>circRIMS2</i> | miR-875-5p                           | 1 |
| <i>circRIMS2</i> | miR-93-3p                            | 1 |
| <i>circRIMS2</i> | miR-96-5p/1271-5p                    | 2 |

|                     |                                       |   |
|---------------------|---------------------------------------|---|
| <i>circRNASEH2B</i> | let-7-5p/98-5p                        | 1 |
| <i>circRNASEH2B</i> | let-7a-2-3p/let-7g-3p                 | 2 |
| <i>circRNASEH2B</i> | let-7a-3p/let-7b-3p/let-7f-1-3p/98-3p | 3 |
| <i>circRNASEH2B</i> | let-7c-3p                             | 2 |
| <i>circRNASEH2B</i> | let-7f-2-3p/1185-3p                   | 3 |
| <i>circRNASEH2B</i> | miR-1-5p                              | 2 |
| <i>circRNASEH2B</i> | miR-10-5p                             | 1 |
| <i>circRNASEH2B</i> | miR-101-3p.1                          | 1 |
| <i>circRNASEH2B</i> | miR-101-3p.2                          | 2 |
| <i>circRNASEH2B</i> | miR-101-5p                            | 2 |
| <i>circRNASEH2B</i> | miR-103-3p/107                        | 1 |
| <i>circRNASEH2B</i> | miR-103a-2-5p                         | 1 |
| <i>circRNASEH2B</i> | miR-103b                              | 1 |
| <i>circRNASEH2B</i> | miR-106a-3p                           | 3 |
| <i>circRNASEH2B</i> | miR-1178-3p                           | 2 |
| <i>circRNASEH2B</i> | miR-1179                              | 2 |
| <i>circRNASEH2B</i> | miR-1183                              | 4 |
| <i>circRNASEH2B</i> | miR-1184                              | 3 |
| <i>circRNASEH2B</i> | miR-1185-5p                           | 3 |
| <i>circRNASEH2B</i> | miR-1197                              | 1 |
| <i>circRNASEH2B</i> | miR-1199-5p/6751-3p                   | 3 |
| <i>circRNASEH2B</i> | miR-1200                              | 4 |
| <i>circRNASEH2B</i> | miR-1205                              | 3 |
| <i>circRNASEH2B</i> | miR-1206                              | 2 |
| <i>circRNASEH2B</i> | miR-1207-3p                           | 2 |
| <i>circRNASEH2B</i> | miR-1207-5p/4763-3p                   | 2 |
| <i>circRNASEH2B</i> | miR-122-5p                            | 1 |
| <i>circRNASEH2B</i> | miR-1224-3p                           | 1 |
| <i>circRNASEH2B</i> | miR-1224-5p                           | 2 |
| <i>circRNASEH2B</i> | miR-1225-3p                           | 2 |
| <i>circRNASEH2B</i> | miR-1226-3p                           | 1 |
| <i>circRNASEH2B</i> | miR-1227-5p                           | 1 |
| <i>circRNASEH2B</i> | miR-1229-3p                           | 3 |
| <i>circRNASEH2B</i> | miR-1231                              | 2 |
| <i>circRNASEH2B</i> | miR-1233-3p                           | 2 |
| <i>circRNASEH2B</i> | miR-1236-3p                           | 2 |
| <i>circRNASEH2B</i> | miR-1236-5p                           | 1 |
| <i>circRNASEH2B</i> | miR-1237-3p                           | 2 |

|                     |                          |   |
|---------------------|--------------------------|---|
| <i>circRNASEH2B</i> | miR-1237-5p/4488/4697-5p | 1 |
| <i>circRNASEH2B</i> | miR-1238-3p              | 4 |
| <i>circRNASEH2B</i> | miR-1238-5p/4758-5p      | 1 |
| <i>circRNASEH2B</i> | miR-124-5p               | 2 |
| <i>circRNASEH2B</i> | miR-1243                 | 1 |
| <i>circRNASEH2B</i> | miR-1244                 | 2 |
| <i>circRNASEH2B</i> | miR-1246                 | 1 |
| <i>circRNASEH2B</i> | miR-1247-3p              | 1 |
| <i>circRNASEH2B</i> | miR-1248                 | 2 |
| <i>circRNASEH2B</i> | miR-125-5p               | 3 |
| <i>circRNASEH2B</i> | miR-1250-3p              | 6 |
| <i>circRNASEH2B</i> | miR-1252-3p              | 3 |
| <i>circRNASEH2B</i> | miR-1253                 | 3 |
| <i>circRNASEH2B</i> | miR-1254/3116            | 1 |
| <i>circRNASEH2B</i> | miR-1255b-2-3p           | 3 |
| <i>circRNASEH2B</i> | miR-1257                 | 2 |
| <i>circRNASEH2B</i> | miR-125a-3p              | 2 |
| <i>circRNASEH2B</i> | miR-126-5p               | 2 |
| <i>circRNASEH2B</i> | miR-1260a/1260b          | 2 |
| <i>circRNASEH2B</i> | miR-1262/4701-3p/6736-5p | 1 |
| <i>circRNASEH2B</i> | miR-1265                 | 1 |
| <i>circRNASEH2B</i> | miR-1266-3p              | 1 |
| <i>circRNASEH2B</i> | miR-1266-5p/4518         | 3 |
| <i>circRNASEH2B</i> | miR-1269                 | 1 |
| <i>circRNASEH2B</i> | miR-127-5p               | 1 |
| <i>circRNASEH2B</i> | miR-1270                 | 3 |
| <i>circRNASEH2B</i> | miR-1272                 | 1 |
| <i>circRNASEH2B</i> | miR-1275/4665-5p         | 2 |
| <i>circRNASEH2B</i> | miR-1276                 | 2 |
| <i>circRNASEH2B</i> | miR-1277-5p              | 4 |
| <i>circRNASEH2B</i> | miR-1279                 | 4 |
| <i>circRNASEH2B</i> | miR-128-3p               | 1 |
| <i>circRNASEH2B</i> | miR-1281                 | 1 |
| <i>circRNASEH2B</i> | miR-1284                 | 6 |
| <i>circRNASEH2B</i> | miR-1285-5p              | 2 |
| <i>circRNASEH2B</i> | miR-1286                 | 2 |
| <i>circRNASEH2B</i> | miR-1287-5p              | 1 |
| <i>circRNASEH2B</i> | miR-1289                 | 1 |

|                     |                                    |   |
|---------------------|------------------------------------|---|
| <i>circRNASEH2B</i> | miR-1290                           | 4 |
| <i>circRNASEH2B</i> | miR-1291/6775-3p                   | 1 |
| <i>circRNASEH2B</i> | miR-1292-5p                        | 1 |
| <i>circRNASEH2B</i> | miR-1295b-5p/1912                  | 2 |
| <i>circRNASEH2B</i> | miR-1298-3p                        | 2 |
| <i>circRNASEH2B</i> | miR-1298-5p                        | 1 |
| <i>circRNASEH2B</i> | miR-1299                           | 4 |
| <i>circRNASEH2B</i> | miR-1301-3p                        | 1 |
| <i>circRNASEH2B</i> | miR-1304-3p                        | 3 |
| <i>circRNASEH2B</i> | miR-1305                           | 1 |
| <i>circRNASEH2B</i> | miR-1306-5p                        | 3 |
| <i>circRNASEH2B</i> | miR-130b-5p                        | 4 |
| <i>circRNASEH2B</i> | miR-132-3p/212-3p                  | 1 |
| <i>circRNASEH2B</i> | miR-132-5p                         | 1 |
| <i>circRNASEH2B</i> | miR-1322                           | 1 |
| <i>circRNASEH2B</i> | miR-133a-3p.2/133b                 | 1 |
| <i>circRNASEH2B</i> | miR-135-5p                         | 4 |
| <i>circRNASEH2B</i> | miR-135a-3p                        | 1 |
| <i>circRNASEH2B</i> | miR-136-5p                         | 1 |
| <i>circRNASEH2B</i> | miR-138-1-3p                       | 1 |
| <i>circRNASEH2B</i> | miR-138-2-3p                       | 4 |
| <i>circRNASEH2B</i> | miR-139-3p                         | 1 |
| <i>circRNASEH2B</i> | miR-139-5p                         | 1 |
| <i>circRNASEH2B</i> | miR-140-3p.1                       | 2 |
| <i>circRNASEH2B</i> | miR-140-3p.2                       | 1 |
| <i>circRNASEH2B</i> | miR-141-5p                         | 2 |
| <i>circRNASEH2B</i> | miR-142-3p.1                       | 2 |
| <i>circRNASEH2B</i> | miR-143-5p                         | 2 |
| <i>circRNASEH2B</i> | miR-144-3p                         | 1 |
| <i>circRNASEH2B</i> | miR-144-5p                         | 2 |
| <i>circRNASEH2B</i> | miR-145-3p                         | 3 |
| <i>circRNASEH2B</i> | miR-146-5p                         | 1 |
| <i>circRNASEH2B</i> | miR-1468-3p                        | 2 |
| <i>circRNASEH2B</i> | miR-1468-5p                        | 1 |
| <i>circRNASEH2B</i> | miR-146a-3p                        | 1 |
| <i>circRNASEH2B</i> | miR-1470                           | 2 |
| <i>circRNASEH2B</i> | miR-148a-5p                        | 1 |
| <i>circRNASEH2B</i> | miR-149-3p/4728-5p/6785-5p/6883-5p | 1 |

|                     |                      |   |
|---------------------|----------------------|---|
| <i>circRNASEH2B</i> | miR-149-5p           | 1 |
| <i>circRNASEH2B</i> | miR-150-5p           | 3 |
| <i>circRNASEH2B</i> | miR-152-5p           | 2 |
| <i>circRNASEH2B</i> | miR-153-3p           | 1 |
| <i>circRNASEH2B</i> | miR-153-5p           | 2 |
| <i>circRNASEH2B</i> | miR-1537-5p          | 5 |
| <i>circRNASEH2B</i> | miR-154-3p/487-3p    | 2 |
| <i>circRNASEH2B</i> | miR-155-3p           | 1 |
| <i>circRNASEH2B</i> | miR-155-5p           | 1 |
| <i>circRNASEH2B</i> | miR-1587/3620-5p     | 1 |
| <i>circRNASEH2B</i> | miR-15b-3p           | 1 |
| <i>circRNASEH2B</i> | miR-17-3p            | 3 |
| <i>circRNASEH2B</i> | miR-18-5p            | 1 |
| <i>circRNASEH2B</i> | miR-181-3p/4420      | 3 |
| <i>circRNASEH2B</i> | miR-181-5p           | 2 |
| <i>circRNASEH2B</i> | miR-181d-3p          | 1 |
| <i>circRNASEH2B</i> | miR-182-5p           | 2 |
| <i>circRNASEH2B</i> | miR-1827             | 3 |
| <i>circRNASEH2B</i> | miR-183-3p           | 3 |
| <i>circRNASEH2B</i> | miR-183-5p.1         | 1 |
| <i>circRNASEH2B</i> | miR-185-3p           | 4 |
| <i>circRNASEH2B</i> | miR-185-5p           | 1 |
| <i>circRNASEH2B</i> | miR-186-5p           | 7 |
| <i>circRNASEH2B</i> | miR-187-5p           | 1 |
| <i>circRNASEH2B</i> | miR-188-3p           | 2 |
| <i>circRNASEH2B</i> | miR-188-5p           | 1 |
| <i>circRNASEH2B</i> | miR-18a-3p           | 1 |
| <i>circRNASEH2B</i> | miR-19-3p            | 3 |
| <i>circRNASEH2B</i> | miR-19-5p            | 1 |
| <i>circRNASEH2B</i> | miR-1909-3p/6722-3p  | 1 |
| <i>circRNASEH2B</i> | miR-190a-3p          | 4 |
| <i>circRNASEH2B</i> | miR-1910-3p/6511a-5p | 3 |
| <i>circRNASEH2B</i> | miR-1914-5p          | 1 |
| <i>circRNASEH2B</i> | miR-193-3p           | 1 |
| <i>circRNASEH2B</i> | miR-194-3p           | 2 |
| <i>circRNASEH2B</i> | miR-194-5p           | 1 |
| <i>circRNASEH2B</i> | miR-196-5p           | 1 |
| <i>circRNASEH2B</i> | miR-197-3p           | 1 |



|                     |                     |   |
|---------------------|---------------------|---|
| <i>circRNASEH2B</i> | miR-1976            | 3 |
| <i>circRNASEH2B</i> | miR-198             | 1 |
| <i>circRNASEH2B</i> | miR-199-3p          | 1 |
| <i>circRNASEH2B</i> | miR-200ab-5p        | 1 |
| <i>circRNASEH2B</i> | miR-200c-5p/550a-3p | 1 |
| <i>circRNASEH2B</i> | miR-202-3p          | 2 |
| <i>circRNASEH2B</i> | miR-202-5p          | 1 |
| <i>circRNASEH2B</i> | miR-203a-3p.1       | 4 |
| <i>circRNASEH2B</i> | miR-203b-3p         | 1 |
| <i>circRNASEH2B</i> | miR-204-3p/4646-5p  | 1 |
| <i>circRNASEH2B</i> | miR-204-5p/211-5p   | 1 |
| <i>circRNASEH2B</i> | miR-205-3p          | 1 |
| <i>circRNASEH2B</i> | miR-205-5p          | 1 |
| <i>circRNASEH2B</i> | miR-2052            | 1 |
| <i>circRNASEH2B</i> | miR-2053            | 3 |
| <i>circRNASEH2B</i> | miR-2054            | 3 |
| <i>circRNASEH2B</i> | miR-208-5p          | 1 |
| <i>circRNASEH2B</i> | miR-20b-3p          | 3 |
| <i>circRNASEH2B</i> | miR-21-3p/3591-3p   | 1 |
| <i>circRNASEH2B</i> | miR-21-5p/590-5p    | 1 |
| <i>circRNASEH2B</i> | miR-211-3p          | 1 |
| <i>circRNASEH2B</i> | miR-2110            | 1 |
| <i>circRNASEH2B</i> | miR-2113            | 1 |
| <i>circRNASEH2B</i> | miR-2115-3p         | 3 |
| <i>circRNASEH2B</i> | miR-2116-3p         | 3 |
| <i>circRNASEH2B</i> | miR-2117            | 1 |
| <i>circRNASEH2B</i> | miR-212-5p          | 2 |
| <i>circRNASEH2B</i> | miR-214-5p          | 1 |
| <i>circRNASEH2B</i> | miR-215-3p          | 1 |
| <i>circRNASEH2B</i> | miR-216a-5p         | 1 |
| <i>circRNASEH2B</i> | miR-216b-3p         | 4 |
| <i>circRNASEH2B</i> | miR-216b-5p         | 1 |
| <i>circRNASEH2B</i> | miR-218-5p          | 1 |
| <i>circRNASEH2B</i> | miR-219a-1-3p       | 1 |
| <i>circRNASEH2B</i> | miR-219b-5p         | 1 |
| <i>circRNASEH2B</i> | miR-22-3p           | 2 |
| <i>circRNASEH2B</i> | miR-221-5p/8073     | 1 |
| <i>circRNASEH2B</i> | miR-222-5p          | 2 |

|                     |                                              |   |
|---------------------|----------------------------------------------|---|
| <i>circRNASEH2B</i> | miR-223-3p                                   | 1 |
| <i>circRNASEH2B</i> | miR-223-5p                                   | 1 |
| <i>circRNASEH2B</i> | miR-224-5p                                   | 3 |
| <i>circRNASEH2B</i> | miR-2276-3p                                  | 1 |
| <i>circRNASEH2B</i> | miR-2278                                     | 4 |
| <i>circRNASEH2B</i> | miR-23-3p                                    | 3 |
| <i>circRNASEH2B</i> | miR-2355-3p                                  | 1 |
| <i>circRNASEH2B</i> | miR-2355-5p                                  | 2 |
| <i>circRNASEH2B</i> | miR-24-3p                                    | 2 |
| <i>circRNASEH2B</i> | miR-2467-3p                                  | 1 |
| <i>circRNASEH2B</i> | miR-2467-5p                                  | 4 |
| <i>circRNASEH2B</i> | miR-26-3p                                    | 2 |
| <i>circRNASEH2B</i> | miR-26-5p                                    | 1 |
| <i>circRNASEH2B</i> | miR-2681-5p                                  | 4 |
| <i>circRNASEH2B</i> | miR-2682-3p/6781-3p                          | 1 |
| <i>circRNASEH2B</i> | miR-26b-3p                                   | 2 |
| <i>circRNASEH2B</i> | miR-2861                                     | 1 |
| <i>circRNASEH2B</i> | miR-29-3p                                    | 1 |
| <i>circRNASEH2B</i> | miR-2909                                     | 2 |
| <i>circRNASEH2B</i> | miR-296-3p                                   | 1 |
| <i>circRNASEH2B</i> | miR-297                                      | 1 |
| <i>circRNASEH2B</i> | miR-298                                      | 3 |
| <i>circRNASEH2B</i> | miR-299-3p                                   | 1 |
| <i>circRNASEH2B</i> | miR-29a-5p                                   | 5 |
| <i>circRNASEH2B</i> | miR-29b-2-5p                                 | 1 |
| <i>circRNASEH2B</i> | miR-30-3p                                    | 2 |
| <i>circRNASEH2B</i> | miR-30-5p                                    | 1 |
| <i>circRNASEH2B</i> | miR-301a-5p/301b-5p                          | 2 |
| <i>circRNASEH2B</i> | miR-302a-5p                                  | 4 |
| <i>circRNASEH2B</i> | miR-302b-5p/302d-5p                          | 5 |
| <i>circRNASEH2B</i> | miR-302c-5p                                  | 1 |
| <i>circRNASEH2B</i> | miR-302f                                     | 1 |
| <i>circRNASEH2B</i> | miR-3064-5p                                  | 1 |
| <i>circRNASEH2B</i> | miR-3065-3p                                  | 3 |
| <i>circRNASEH2B</i> | miR-3065-5p                                  | 1 |
| <i>circRNASEH2B</i> | miR-3074-3p                                  | 2 |
| <i>circRNASEH2B</i> | miR-3074-5p                                  | 3 |
| <i>circRNASEH2B</i> | miR-30b-3p/1273h-5p/3689-3p/6779-5p/6780a-5p |   |

|                     |                       |   |
|---------------------|-----------------------|---|
| <i>circRNASEH2B</i> | miR-30c-3p/6788-5p    | 2 |
| <i>circRNASEH2B</i> | miR-31-5p             | 2 |
| <i>circRNASEH2B</i> | miR-3115              | 1 |
| <i>circRNASEH2B</i> | miR-3119              | 1 |
| <i>circRNASEH2B</i> | miR-3120-3p           | 1 |
| <i>circRNASEH2B</i> | miR-3120-5p           | 4 |
| <i>circRNASEH2B</i> | miR-3121-3p           | 1 |
| <i>circRNASEH2B</i> | miR-3122/3913-5p      | 2 |
| <i>circRNASEH2B</i> | miR-3123              | 1 |
| <i>circRNASEH2B</i> | miR-3124-3p           | 2 |
| <i>circRNASEH2B</i> | miR-3125/3916/6859-5p | 1 |
| <i>circRNASEH2B</i> | miR-3126-3p           | 2 |
| <i>circRNASEH2B</i> | miR-3126-5p           | 1 |
| <i>circRNASEH2B</i> | miR-3127-5p           | 1 |
| <i>circRNASEH2B</i> | miR-3128              | 1 |
| <i>circRNASEH2B</i> | miR-3129-3p/5583-5p   | 3 |
| <i>circRNASEH2B</i> | miR-3130-3p           | 1 |
| <i>circRNASEH2B</i> | miR-3130-5p/4482-5p   | 2 |
| <i>circRNASEH2B</i> | miR-3133              | 7 |
| <i>circRNASEH2B</i> | miR-3134              | 3 |
| <i>circRNASEH2B</i> | miR-3135b             | 1 |
| <i>circRNASEH2B</i> | miR-3136-5p/4439      | 2 |
| <i>circRNASEH2B</i> | miR-3137              | 3 |
| <i>circRNASEH2B</i> | miR-3140-3p           | 1 |
| <i>circRNASEH2B</i> | miR-3140-5p           | 3 |
| <i>circRNASEH2B</i> | miR-3143              | 1 |
| <i>circRNASEH2B</i> | miR-3144-3p           | 1 |
| <i>circRNASEH2B</i> | miR-3145-3p           | 2 |
| <i>circRNASEH2B</i> | miR-3145-5p           | 1 |
| <i>circRNASEH2B</i> | miR-3146              | 1 |
| <i>circRNASEH2B</i> | miR-3147              | 1 |
| <i>circRNASEH2B</i> | miR-3148              | 3 |
| <i>circRNASEH2B</i> | miR-3149              | 1 |
| <i>circRNASEH2B</i> | miR-3150a-3p          | 1 |
| <i>circRNASEH2B</i> | miR-3150a-5p/3150b-5p | 2 |
| <i>circRNASEH2B</i> | miR-3151-3p           | 2 |
| <i>circRNASEH2B</i> | miR-3151-5p           | 1 |
| <i>circRNASEH2B</i> | miR-3152-5p           | 2 |

|                     |                           |   |
|---------------------|---------------------------|---|
| <i>circRNASEH2B</i> | miR-3153/6733-5p/6739-5p  | 2 |
| <i>circRNASEH2B</i> | miR-3154                  | 1 |
| <i>circRNASEH2B</i> | miR-3156-3p               | 2 |
| <i>circRNASEH2B</i> | miR-3156-5p               | 2 |
| <i>circRNASEH2B</i> | miR-3157-5p               | 3 |
| <i>circRNASEH2B</i> | miR-3158-3p               | 1 |
| <i>circRNASEH2B</i> | miR-3158-5p               | 3 |
| <i>circRNASEH2B</i> | miR-3159                  | 3 |
| <i>circRNASEH2B</i> | miR-3160-5p               | 1 |
| <i>circRNASEH2B</i> | miR-3161                  | 1 |
| <i>circRNASEH2B</i> | miR-3162-5p               | 3 |
| <i>circRNASEH2B</i> | miR-3163                  | 5 |
| <i>circRNASEH2B</i> | miR-3169                  | 2 |
| <i>circRNASEH2B</i> | miR-3171                  | 3 |
| <i>circRNASEH2B</i> | miR-3175                  | 1 |
| <i>circRNASEH2B</i> | miR-3176/3922-3p          | 2 |
| <i>circRNASEH2B</i> | miR-3179                  | 1 |
| <i>circRNASEH2B</i> | miR-3180-5p               | 4 |
| <i>circRNASEH2B</i> | miR-3182                  | 1 |
| <i>circRNASEH2B</i> | miR-3183/4723-3p/6769b-3p | 2 |
| <i>circRNASEH2B</i> | miR-3185                  | 2 |
| <i>circRNASEH2B</i> | miR-3188                  | 4 |
| <i>circRNASEH2B</i> | miR-3189-3p               | 2 |
| <i>circRNASEH2B</i> | miR-3189-5p               | 1 |
| <i>circRNASEH2B</i> | miR-3190-3p               | 3 |
| <i>circRNASEH2B</i> | miR-3190-5p               | 2 |
| <i>circRNASEH2B</i> | miR-3191-5p               | 1 |
| <i>circRNASEH2B</i> | miR-3192-3p               | 2 |
| <i>circRNASEH2B</i> | miR-3192-5p               | 1 |
| <i>circRNASEH2B</i> | miR-3194-3p               | 1 |
| <i>circRNASEH2B</i> | miR-32-3p                 | 3 |
| <i>circRNASEH2B</i> | miR-320                   | 2 |
| <i>circRNASEH2B</i> | miR-3200-5p               | 1 |
| <i>circRNASEH2B</i> | miR-3202                  | 1 |
| <i>circRNASEH2B</i> | miR-320e                  | 1 |
| <i>circRNASEH2B</i> | miR-323-3p                | 5 |
| <i>circRNASEH2B</i> | miR-323b-3p               | 1 |
| <i>circRNASEH2B</i> | miR-323b-5p/410-5p/494-5p | 2 |

|                     |                       |   |
|---------------------|-----------------------|---|
| <i>circRNASEH2B</i> | miR-324-3p/1913       | 1 |
| <i>circRNASEH2B</i> | miR-326               | 1 |
| <i>circRNASEH2B</i> | miR-328-3p            | 1 |
| <i>circRNASEH2B</i> | miR-329-5p            | 2 |
| <i>circRNASEH2B</i> | miR-330-3p            | 3 |
| <i>circRNASEH2B</i> | miR-330-3p.2          | 2 |
| <i>circRNASEH2B</i> | miR-335-3p            | 4 |
| <i>circRNASEH2B</i> | miR-335-5p            | 1 |
| <i>circRNASEH2B</i> | miR-337-3p            | 1 |
| <i>circRNASEH2B</i> | miR-338-3p            | 1 |
| <i>circRNASEH2B</i> | miR-339-5p            | 1 |
| <i>circRNASEH2B</i> | miR-33a-3p            | 4 |
| <i>circRNASEH2B</i> | miR-340-5p            | 3 |
| <i>circRNASEH2B</i> | miR-345-3p            | 3 |
| <i>circRNASEH2B</i> | miR-345-5p            | 2 |
| <i>circRNASEH2B</i> | miR-346               | 2 |
| <i>circRNASEH2B</i> | miR-34a-3p            | 1 |
| <i>circRNASEH2B</i> | miR-34b-3p            | 4 |
| <i>circRNASEH2B</i> | miR-34b-5p/449c-5p    | 3 |
| <i>circRNASEH2B</i> | miR-34c-3p            | 4 |
| <i>circRNASEH2B</i> | miR-3529-3p           | 1 |
| <i>circRNASEH2B</i> | miR-3605-5p           | 3 |
| <i>circRNASEH2B</i> | miR-3607-3p           | 1 |
| <i>circRNASEH2B</i> | miR-3607-5p           | 1 |
| <i>circRNASEH2B</i> | miR-361-3p            | 3 |
| <i>circRNASEH2B</i> | miR-361-5p            | 3 |
| <i>circRNASEH2B</i> | miR-3611              | 3 |
| <i>circRNASEH2B</i> | miR-3612              | 2 |
| <i>circRNASEH2B</i> | miR-3613-3p           | 1 |
| <i>circRNASEH2B</i> | miR-3613-5p           | 1 |
| <i>circRNASEH2B</i> | miR-3614-3p           | 3 |
| <i>circRNASEH2B</i> | miR-3616-3p           | 1 |
| <i>circRNASEH2B</i> | miR-3617-3p           | 1 |
| <i>circRNASEH2B</i> | miR-3618              | 1 |
| <i>circRNASEH2B</i> | miR-3620-3p           | 2 |
| <i>circRNASEH2B</i> | miR-3622a-3p/3622b-3p | 1 |
| <i>circRNASEH2B</i> | miR-3622a-5p          | 1 |
| <i>circRNASEH2B</i> | miR-3646              | 3 |

|                     |                                   |   |
|---------------------|-----------------------------------|---|
| <i>circRNASEH2B</i> | miR-365-3p                        | 1 |
| <i>circRNASEH2B</i> | miR-3650                          | 1 |
| <i>circRNASEH2B</i> | miR-3652/4430                     | 1 |
| <i>circRNASEH2B</i> | miR-3653-3p                       | 4 |
| <i>circRNASEH2B</i> | miR-3653-5p                       | 3 |
| <i>circRNASEH2B</i> | miR-3654                          | 1 |
| <i>circRNASEH2B</i> | miR-3655                          | 1 |
| <i>circRNASEH2B</i> | miR-3658                          | 2 |
| <i>circRNASEH2B</i> | miR-3659                          | 1 |
| <i>circRNASEH2B</i> | miR-3660/4526                     | 2 |
| <i>circRNASEH2B</i> | miR-3662                          | 3 |
| <i>circRNASEH2B</i> | miR-3663-3p                       | 3 |
| <i>circRNASEH2B</i> | miR-3664-3p                       | 3 |
| <i>circRNASEH2B</i> | miR-3664-5p                       | 1 |
| <i>circRNASEH2B</i> | miR-3665                          | 1 |
| <i>circRNASEH2B</i> | miR-3667-3p                       | 1 |
| <i>circRNASEH2B</i> | miR-3667-5p                       | 1 |
| <i>circRNASEH2B</i> | miR-3668                          | 2 |
| <i>circRNASEH2B</i> | miR-3671                          | 1 |
| <i>circRNASEH2B</i> | miR-3672/6864-3p                  | 2 |
| <i>circRNASEH2B</i> | miR-3677-5p                       | 1 |
| <i>circRNASEH2B</i> | miR-3679-3p                       | 3 |
| <i>circRNASEH2B</i> | miR-3681-5p                       | 3 |
| <i>circRNASEH2B</i> | miR-3682-5p                       | 2 |
| <i>circRNASEH2B</i> | miR-3685                          | 1 |
| <i>circRNASEH2B</i> | miR-3686                          | 1 |
| <i>circRNASEH2B</i> | miR-3687/4442                     | 1 |
| <i>circRNASEH2B</i> | miR-3688-5p                       | 1 |
| <i>circRNASEH2B</i> | miR-3689a-5p/3689b-5p/3689e/3689f | 1 |
| <i>circRNASEH2B</i> | miR-3689d/6851-5p                 | 1 |
| <i>circRNASEH2B</i> | miR-369-3p                        | 1 |
| <i>circRNASEH2B</i> | miR-3690                          | 1 |
| <i>circRNASEH2B</i> | miR-3691-5p                       | 1 |
| <i>circRNASEH2B</i> | miR-3692-5p                       | 5 |
| <i>circRNASEH2B</i> | miR-371-5p                        | 2 |
| <i>circRNASEH2B</i> | miR-371b-5p/373-5p/616-5p         | 2 |
| <i>circRNASEH2B</i> | miR-372-5p                        | 2 |
| <i>circRNASEH2B</i> | miR-374-5p                        | 2 |

|                     |                     |   |
|---------------------|---------------------|---|
| <i>circRNASEH2B</i> | miR-374a-3p         | 1 |
| <i>circRNASEH2B</i> | miR-374b-3p         | 3 |
| <i>circRNASEH2B</i> | miR-374c-3p         | 1 |
| <i>circRNASEH2B</i> | miR-375             | 1 |
| <i>circRNASEH2B</i> | miR-376-3p          | 1 |
| <i>circRNASEH2B</i> | miR-376a-2-5p       | 1 |
| <i>circRNASEH2B</i> | miR-376a-5p         | 1 |
| <i>circRNASEH2B</i> | miR-377-5p/6086     | 2 |
| <i>circRNASEH2B</i> | miR-378-3p          | 2 |
| <i>circRNASEH2B</i> | miR-378a-5p         | 4 |
| <i>circRNASEH2B</i> | miR-378g            | 3 |
| <i>circRNASEH2B</i> | miR-378j/6839-5p    | 3 |
| <i>circRNASEH2B</i> | miR-380-3p          | 2 |
| <i>circRNASEH2B</i> | miR-381-3p          | 3 |
| <i>circRNASEH2B</i> | miR-383-3p          | 3 |
| <i>circRNASEH2B</i> | miR-383-5p.1        | 1 |
| <i>circRNASEH2B</i> | miR-383-5p.2        | 1 |
| <i>circRNASEH2B</i> | miR-384             | 1 |
| <i>circRNASEH2B</i> | miR-3908            | 2 |
| <i>circRNASEH2B</i> | miR-3911            | 1 |
| <i>circRNASEH2B</i> | miR-3912-5p         | 1 |
| <i>circRNASEH2B</i> | miR-3913-3p         | 2 |
| <i>circRNASEH2B</i> | miR-3915            | 2 |
| <i>circRNASEH2B</i> | miR-3918            | 1 |
| <i>circRNASEH2B</i> | miR-3919            | 2 |
| <i>circRNASEH2B</i> | miR-3920            | 2 |
| <i>circRNASEH2B</i> | miR-3921/4653-5p    | 2 |
| <i>circRNASEH2B</i> | miR-3925-5p         | 1 |
| <i>circRNASEH2B</i> | miR-3927-3p/6831-5p | 1 |
| <i>circRNASEH2B</i> | miR-3927-5p         | 1 |
| <i>circRNASEH2B</i> | miR-3928-3p         | 2 |
| <i>circRNASEH2B</i> | miR-3928-5p/6806-3p | 3 |
| <i>circRNASEH2B</i> | miR-3929/4419b/4478 | 3 |
| <i>circRNASEH2B</i> | miR-3934-5p         | 2 |
| <i>circRNASEH2B</i> | miR-3936            | 2 |
| <i>circRNASEH2B</i> | miR-3941            | 1 |
| <i>circRNASEH2B</i> | miR-3942-5p         | 2 |
| <i>circRNASEH2B</i> | miR-3943            | 1 |

|                     |                           |   |
|---------------------|---------------------------|---|
| <i>circRNASEH2B</i> | miR-3945                  | 2 |
| <i>circRNASEH2B</i> | miR-3975                  | 4 |
| <i>circRNASEH2B</i> | miR-3976                  | 1 |
| <i>circRNASEH2B</i> | miR-3978                  | 2 |
| <i>circRNASEH2B</i> | miR-410-3p                | 4 |
| <i>circRNASEH2B</i> | miR-411-5p.2              | 1 |
| <i>circRNASEH2B</i> | miR-4251                  | 2 |
| <i>circRNASEH2B</i> | miR-4252                  | 4 |
| <i>circRNASEH2B</i> | miR-4253/6862-5p          | 2 |
| <i>circRNASEH2B</i> | miR-4254                  | 1 |
| <i>circRNASEH2B</i> | miR-4260                  | 3 |
| <i>circRNASEH2B</i> | miR-4261                  | 2 |
| <i>circRNASEH2B</i> | miR-4263                  | 1 |
| <i>circRNASEH2B</i> | miR-4264                  | 2 |
| <i>circRNASEH2B</i> | miR-4266                  | 1 |
| <i>circRNASEH2B</i> | miR-4268                  | 2 |
| <i>circRNASEH2B</i> | miR-4269/6715b-5p         | 1 |
| <i>circRNASEH2B</i> | miR-4270/4441/6754-5p     | 1 |
| <i>circRNASEH2B</i> | miR-4271/4725-3p/6780b-5p | 1 |
| <i>circRNASEH2B</i> | miR-4273/7156-5p          | 1 |
| <i>circRNASEH2B</i> | miR-4274                  | 1 |
| <i>circRNASEH2B</i> | miR-4275                  | 3 |
| <i>circRNASEH2B</i> | miR-4276                  | 2 |
| <i>circRNASEH2B</i> | miR-4277                  | 1 |
| <i>circRNASEH2B</i> | miR-4279                  | 7 |
| <i>circRNASEH2B</i> | miR-4281                  | 2 |
| <i>circRNASEH2B</i> | miR-4282                  | 2 |
| <i>circRNASEH2B</i> | miR-4283                  | 2 |
| <i>circRNASEH2B</i> | miR-4284                  | 2 |
| <i>circRNASEH2B</i> | miR-4286                  | 3 |
| <i>circRNASEH2B</i> | miR-4287/4685-3p          | 3 |
| <i>circRNASEH2B</i> | miR-4289                  | 2 |
| <i>circRNASEH2B</i> | miR-4291                  | 3 |
| <i>circRNASEH2B</i> | miR-4292/6791-5p          | 2 |
| <i>circRNASEH2B</i> | miR-4293                  | 1 |
| <i>circRNASEH2B</i> | miR-4294                  | 1 |
| <i>circRNASEH2B</i> | miR-4301                  | 3 |
| <i>circRNASEH2B</i> | miR-4303                  | 3 |



|                     |                                              |   |
|---------------------|----------------------------------------------|---|
| <i>circRNASEH2B</i> | miR-4307                                     | 3 |
| <i>circRNASEH2B</i> | miR-4308                                     | 2 |
| <i>circRNASEH2B</i> | miR-4311                                     | 2 |
| <i>circRNASEH2B</i> | miR-4314                                     | 2 |
| <i>circRNASEH2B</i> | miR-4317                                     | 1 |
| <i>circRNASEH2B</i> | miR-4323                                     | 1 |
| <i>circRNASEH2B</i> | miR-4324                                     | 4 |
| <i>circRNASEH2B</i> | miR-4325                                     | 1 |
| <i>circRNASEH2B</i> | miR-4326                                     | 1 |
| <i>circRNASEH2B</i> | miR-4328                                     | 3 |
| <i>circRNASEH2B</i> | miR-4329                                     | 2 |
| <i>circRNASEH2B</i> | miR-4330                                     | 2 |
| <i>circRNASEH2B</i> | miR-4419a/4510/6127/6129/6130/6133           | 1 |
| <i>circRNASEH2B</i> | miR-4421/5699-3p                             | 2 |
| <i>circRNASEH2B</i> | miR-4422                                     | 2 |
| <i>circRNASEH2B</i> | miR-4423-3p                                  | 2 |
| <i>circRNASEH2B</i> | miR-4424                                     | 1 |
| <i>circRNASEH2B</i> | miR-4425                                     | 1 |
| <i>circRNASEH2B</i> | miR-4426/4647/4662b                          | 2 |
| <i>circRNASEH2B</i> | miR-4427                                     | 2 |
| <i>circRNASEH2B</i> | miR-4432                                     | 3 |
| <i>circRNASEH2B</i> | miR-4433a-3p                                 | 3 |
| <i>circRNASEH2B</i> | miR-4433a-5p                                 | 1 |
| <i>circRNASEH2B</i> | miR-4433b-3p                                 | 2 |
| <i>circRNASEH2B</i> | miR-4433b-5p                                 | 2 |
| <i>circRNASEH2B</i> | miR-4434/4516/5703                           | 2 |
| <i>circRNASEH2B</i> | miR-4436b-3p/4632-5p/6735-5p/6879-5p/7843-5p | 1 |
| <i>circRNASEH2B</i> | miR-4437                                     | 1 |
| <i>circRNASEH2B</i> | miR-4443                                     | 2 |
| <i>circRNASEH2B</i> | miR-4446-3p                                  | 1 |
| <i>circRNASEH2B</i> | miR-4446-5p                                  | 1 |
| <i>circRNASEH2B</i> | miR-4447/4472                                | 1 |
| <i>circRNASEH2B</i> | miR-4448                                     | 2 |
| <i>circRNASEH2B</i> | miR-4450                                     | 1 |
| <i>circRNASEH2B</i> | miR-4452                                     | 3 |
| <i>circRNASEH2B</i> | miR-4453/4538                                | 1 |
| <i>circRNASEH2B</i> | miR-4459                                     | 3 |
| <i>circRNASEH2B</i> | miR-4460                                     | 2 |

|                     |                    |   |
|---------------------|--------------------|---|
| <i>circRNASEH2B</i> | miR-4463           | 2 |
| <i>circRNASEH2B</i> | miR-4464/4748      | 1 |
| <i>circRNASEH2B</i> | miR-4469           | 3 |
| <i>circRNASEH2B</i> | miR-4470           | 2 |
| <i>circRNASEH2B</i> | miR-4471/8059      | 1 |
| <i>circRNASEH2B</i> | miR-4474-3p        | 2 |
| <i>circRNASEH2B</i> | miR-4474-5p        | 1 |
| <i>circRNASEH2B</i> | miR-4476/6876-5p   | 2 |
| <i>circRNASEH2B</i> | miR-448            | 1 |
| <i>circRNASEH2B</i> | miR-4482-3p        | 1 |
| <i>circRNASEH2B</i> | miR-4485-5p        | 1 |
| <i>circRNASEH2B</i> | miR-4486           | 3 |
| <i>circRNASEH2B</i> | miR-4489           | 2 |
| <i>circRNASEH2B</i> | miR-4490           | 1 |
| <i>circRNASEH2B</i> | miR-4491/4657      | 1 |
| <i>circRNASEH2B</i> | miR-4493           | 1 |
| <i>circRNASEH2B</i> | miR-4494           | 2 |
| <i>circRNASEH2B</i> | miR-4496           | 3 |
| <i>circRNASEH2B</i> | miR-4499           | 2 |
| <i>circRNASEH2B</i> | miR-449c-3p        | 1 |
| <i>circRNASEH2B</i> | miR-4501           | 3 |
| <i>circRNASEH2B</i> | miR-4502           | 2 |
| <i>circRNASEH2B</i> | miR-4503           | 1 |
| <i>circRNASEH2B</i> | miR-4504           | 1 |
| <i>circRNASEH2B</i> | miR-4505/5787      | 1 |
| <i>circRNASEH2B</i> | miR-450a-1-3p      | 2 |
| <i>circRNASEH2B</i> | miR-450a-2-3p      | 3 |
| <i>circRNASEH2B</i> | miR-450b-3p/769-3p | 1 |
| <i>circRNASEH2B</i> | miR-4512           | 1 |
| <i>circRNASEH2B</i> | miR-4513/6855-3p   | 2 |
| <i>circRNASEH2B</i> | miR-4514/4692      | 1 |
| <i>circRNASEH2B</i> | miR-4517           | 1 |
| <i>circRNASEH2B</i> | miR-4519           | 1 |
| <i>circRNASEH2B</i> | miR-451b           | 1 |
| <i>circRNASEH2B</i> | miR-452-3p         | 2 |
| <i>circRNASEH2B</i> | miR-452-5p/892-3p  | 1 |
| <i>circRNASEH2B</i> | miR-4520-3p        | 1 |
| <i>circRNASEH2B</i> | miR-4521           | 1 |

|                     |                       |   |
|---------------------|-----------------------|---|
| <i>circRNASEH2B</i> | miR-4527/6503-5p      | 2 |
| <i>circRNASEH2B</i> | miR-4528              | 1 |
| <i>circRNASEH2B</i> | miR-4530              | 1 |
| <i>circRNASEH2B</i> | miR-4531              | 3 |
| <i>circRNASEH2B</i> | miR-4532              | 1 |
| <i>circRNASEH2B</i> | miR-4533              | 1 |
| <i>circRNASEH2B</i> | miR-4534/8082         | 3 |
| <i>circRNASEH2B</i> | miR-4539              | 1 |
| <i>circRNASEH2B</i> | miR-454-5p            | 1 |
| <i>circRNASEH2B</i> | miR-455-3p.2          | 2 |
| <i>circRNASEH2B</i> | miR-4632-3p           | 1 |
| <i>circRNASEH2B</i> | miR-4635              | 5 |
| <i>circRNASEH2B</i> | miR-4638-3p           | 2 |
| <i>circRNASEH2B</i> | miR-4640-3p           | 2 |
| <i>circRNASEH2B</i> | miR-4641              | 4 |
| <i>circRNASEH2B</i> | miR-4642              | 2 |
| <i>circRNASEH2B</i> | miR-4643              | 3 |
| <i>circRNASEH2B</i> | miR-4646-3p           | 1 |
| <i>circRNASEH2B</i> | miR-4649-3p           | 3 |
| <i>circRNASEH2B</i> | miR-4652-3p           | 1 |
| <i>circRNASEH2B</i> | miR-4656              | 2 |
| <i>circRNASEH2B</i> | miR-4658/6790-5p      | 1 |
| <i>circRNASEH2B</i> | miR-4659a-3p/4659b-3p | 1 |
| <i>circRNASEH2B</i> | miR-4661-3p           | 1 |
| <i>circRNASEH2B</i> | miR-4661-5p           | 1 |
| <i>circRNASEH2B</i> | miR-4662a-3p          | 1 |
| <i>circRNASEH2B</i> | miR-4666a-3p          | 3 |
| <i>circRNASEH2B</i> | miR-4667-3p           | 2 |
| <i>circRNASEH2B</i> | miR-4668-3p           | 3 |
| <i>circRNASEH2B</i> | miR-4668-5p           | 2 |
| <i>circRNASEH2B</i> | miR-4670-3p           | 3 |
| <i>circRNASEH2B</i> | miR-4672              | 1 |
| <i>circRNASEH2B</i> | miR-4674              | 1 |
| <i>circRNASEH2B</i> | miR-4675/4741         | 2 |
| <i>circRNASEH2B</i> | miR-4677-3p           | 1 |
| <i>circRNASEH2B</i> | miR-4677-5p           | 1 |
| <i>circRNASEH2B</i> | miR-4678              | 1 |
| <i>circRNASEH2B</i> | miR-4679              | 1 |

|                     |                             |   |
|---------------------|-----------------------------|---|
| <i>circRNASEH2B</i> | miR-4680-3p                 | 2 |
| <i>circRNASEH2B</i> | miR-4682                    | 2 |
| <i>circRNASEH2B</i> | miR-4683                    | 1 |
| <i>circRNASEH2B</i> | miR-4684-5p                 | 2 |
| <i>circRNASEH2B</i> | miR-4685-5p/6837-5p         | 2 |
| <i>circRNASEH2B</i> | miR-4686                    | 2 |
| <i>circRNASEH2B</i> | miR-4687-3p                 | 1 |
| <i>circRNASEH2B</i> | miR-4688/6743-5p            | 2 |
| <i>circRNASEH2B</i> | miR-4689/6858-5p            | 2 |
| <i>circRNASEH2B</i> | miR-4691-3p                 | 4 |
| <i>circRNASEH2B</i> | miR-4691-5p/6792-3p         | 1 |
| <i>circRNASEH2B</i> | miR-4693-5p                 | 1 |
| <i>circRNASEH2B</i> | miR-4694-3p                 | 3 |
| <i>circRNASEH2B</i> | miR-4694-5p                 | 1 |
| <i>circRNASEH2B</i> | miR-4695-5p                 | 2 |
| <i>circRNASEH2B</i> | miR-4696                    | 2 |
| <i>circRNASEH2B</i> | miR-4697-3p                 | 1 |
| <i>circRNASEH2B</i> | miR-4698                    | 1 |
| <i>circRNASEH2B</i> | miR-4699-3p                 | 2 |
| <i>circRNASEH2B</i> | miR-4699-5p                 | 1 |
| <i>circRNASEH2B</i> | miR-4700-3p                 | 1 |
| <i>circRNASEH2B</i> | miR-4704-3p                 | 1 |
| <i>circRNASEH2B</i> | miR-4705                    | 1 |
| <i>circRNASEH2B</i> | miR-4708-3p                 | 1 |
| <i>circRNASEH2B</i> | miR-4709-3p                 | 2 |
| <i>circRNASEH2B</i> | miR-4712-3p                 | 1 |
| <i>circRNASEH2B</i> | miR-4713-5p                 | 3 |
| <i>circRNASEH2B</i> | miR-4714-3p                 | 1 |
| <i>circRNASEH2B</i> | miR-4714-5p                 | 1 |
| <i>circRNASEH2B</i> | miR-4715-3p                 | 3 |
| <i>circRNASEH2B</i> | miR-4716-5p                 | 2 |
| <i>circRNASEH2B</i> | miR-4717-3p                 | 3 |
| <i>circRNASEH2B</i> | miR-4718                    | 5 |
| <i>circRNASEH2B</i> | miR-4720-3p                 | 1 |
| <i>circRNASEH2B</i> | miR-4720-5p/4799-3p/5588-5p | 1 |
| <i>circRNASEH2B</i> | miR-4721                    | 1 |
| <i>circRNASEH2B</i> | miR-4722-3p/6727-3p         | 1 |
| <i>circRNASEH2B</i> | miR-4722-5p                 | 2 |

|                     |                                  |   |
|---------------------|----------------------------------|---|
| <i>circRNASEH2B</i> | miR-4723-5p/5698/6870-5p/7111-5p | 1 |
| <i>circRNASEH2B</i> | miR-4724-3p                      | 3 |
| <i>circRNASEH2B</i> | miR-4727-3p                      | 2 |
| <i>circRNASEH2B</i> | miR-4728-3p                      | 4 |
| <i>circRNASEH2B</i> | miR-4729                         | 1 |
| <i>circRNASEH2B</i> | miR-4732-3p                      | 3 |
| <i>circRNASEH2B</i> | miR-4733-3p                      | 1 |
| <i>circRNASEH2B</i> | miR-4733-5p                      | 1 |
| <i>circRNASEH2B</i> | miR-4736                         | 2 |
| <i>circRNASEH2B</i> | miR-4738-3p                      | 2 |
| <i>circRNASEH2B</i> | miR-4742-3p                      | 1 |
| <i>circRNASEH2B</i> | miR-4742-5p                      | 1 |
| <i>circRNASEH2B</i> | miR-4743-3p                      | 1 |
| <i>circRNASEH2B</i> | miR-4743-5p                      | 1 |
| <i>circRNASEH2B</i> | miR-4746-5p                      | 1 |
| <i>circRNASEH2B</i> | miR-4747-5p/5196-5p              | 1 |
| <i>circRNASEH2B</i> | miR-4750-3p                      | 1 |
| <i>circRNASEH2B</i> | miR-4752                         | 1 |
| <i>circRNASEH2B</i> | miR-4753-3p                      | 4 |
| <i>circRNASEH2B</i> | miR-4755-3p                      | 1 |
| <i>circRNASEH2B</i> | miR-4755-5p/5006-3p              | 2 |
| <i>circRNASEH2B</i> | miR-4756-3p                      | 2 |
| <i>circRNASEH2B</i> | miR-4757-3p                      | 1 |
| <i>circRNASEH2B</i> | miR-4758-3p                      | 1 |
| <i>circRNASEH2B</i> | miR-4759                         | 2 |
| <i>circRNASEH2B</i> | miR-4760-5p/8061                 | 3 |
| <i>circRNASEH2B</i> | miR-4761-3p                      | 1 |
| <i>circRNASEH2B</i> | miR-4761-5p                      | 2 |
| <i>circRNASEH2B</i> | miR-4762-3p                      | 2 |
| <i>circRNASEH2B</i> | miR-4762-5p                      | 1 |
| <i>circRNASEH2B</i> | miR-4764-5p                      | 2 |
| <i>circRNASEH2B</i> | miR-4765                         | 1 |
| <i>circRNASEH2B</i> | miR-4766-3p                      | 4 |
| <i>circRNASEH2B</i> | miR-4766-5p                      | 3 |
| <i>circRNASEH2B</i> | miR-4768-3p                      | 3 |
| <i>circRNASEH2B</i> | miR-4768-5p/6833-3p              | 6 |
| <i>circRNASEH2B</i> | miR-4769-3p/6817-5p              | 2 |
| <i>circRNASEH2B</i> | miR-4772-3p                      | 1 |

|                     |                  |   |
|---------------------|------------------|---|
| <i>circRNASEH2B</i> | miR-4772-5p      | 1 |
| <i>circRNASEH2B</i> | miR-4773         | 3 |
| <i>circRNASEH2B</i> | miR-4774-3p      | 2 |
| <i>circRNASEH2B</i> | miR-4774-5p      | 1 |
| <i>circRNASEH2B</i> | miR-4775         | 3 |
| <i>circRNASEH2B</i> | miR-4777-3p      | 4 |
| <i>circRNASEH2B</i> | miR-4778-3p      | 3 |
| <i>circRNASEH2B</i> | miR-4778-5p      | 2 |
| <i>circRNASEH2B</i> | miR-4779         | 2 |
| <i>circRNASEH2B</i> | miR-4780         | 1 |
| <i>circRNASEH2B</i> | miR-4782-5p/5706 | 4 |
| <i>circRNASEH2B</i> | miR-4786-3p      | 1 |
| <i>circRNASEH2B</i> | miR-4786-5p      | 2 |
| <i>circRNASEH2B</i> | miR-4789-3p      | 3 |
| <i>circRNASEH2B</i> | miR-4789-5p      | 3 |
| <i>circRNASEH2B</i> | miR-4790-3p      | 2 |
| <i>circRNASEH2B</i> | miR-4793-3p      | 1 |
| <i>circRNASEH2B</i> | miR-4796-3p      | 1 |
| <i>circRNASEH2B</i> | miR-4796-5p      | 3 |
| <i>circRNASEH2B</i> | miR-4797-3p      | 2 |
| <i>circRNASEH2B</i> | miR-4799-5p      | 1 |
| <i>circRNASEH2B</i> | miR-4802-5p      | 4 |
| <i>circRNASEH2B</i> | miR-4803         | 4 |
| <i>circRNASEH2B</i> | miR-4804-3p      | 1 |
| <i>circRNASEH2B</i> | miR-483-3p.1     | 1 |
| <i>circRNASEH2B</i> | miR-483-3p.2     | 1 |
| <i>circRNASEH2B</i> | miR-485-5p       | 4 |
| <i>circRNASEH2B</i> | miR-486-3p       | 2 |
| <i>circRNASEH2B</i> | miR-486-5p       | 1 |
| <i>circRNASEH2B</i> | miR-488-3p       | 1 |
| <i>circRNASEH2B</i> | miR-489-3p       | 4 |
| <i>circRNASEH2B</i> | miR-490-3p       | 1 |
| <i>circRNASEH2B</i> | miR-491-5p       | 1 |
| <i>circRNASEH2B</i> | miR-493-3p       | 1 |
| <i>circRNASEH2B</i> | miR-493-5p       | 2 |
| <i>circRNASEH2B</i> | miR-494-3p       | 1 |
| <i>circRNASEH2B</i> | miR-495-3p       | 1 |
| <i>circRNASEH2B</i> | miR-497-3p       | 2 |

|                     |                             |   |
|---------------------|-----------------------------|---|
| <i>circRNASEH2B</i> | miR-4999-3p                 | 2 |
| <i>circRNASEH2B</i> | miR-4999-5p                 | 5 |
| <i>circRNASEH2B</i> | miR-499a-3p/499b-3p         | 1 |
| <i>circRNASEH2B</i> | miR-499b-5p                 | 2 |
| <i>circRNASEH2B</i> | miR-5000-3p                 | 3 |
| <i>circRNASEH2B</i> | miR-5000-5p                 | 1 |
| <i>circRNASEH2B</i> | miR-5002-5p                 | 3 |
| <i>circRNASEH2B</i> | miR-5003-3p                 | 4 |
| <i>circRNASEH2B</i> | miR-5003-5p                 | 2 |
| <i>circRNASEH2B</i> | miR-5007-3p                 | 1 |
| <i>circRNASEH2B</i> | miR-5008-3p/6737-3p/7157-3p | 2 |
| <i>circRNASEH2B</i> | miR-5009-3p                 | 2 |
| <i>circRNASEH2B</i> | miR-5009-5p/8058            | 1 |
| <i>circRNASEH2B</i> | miR-500a-5p                 | 3 |
| <i>circRNASEH2B</i> | miR-500b-3p                 | 2 |
| <i>circRNASEH2B</i> | miR-5010-3p                 | 1 |
| <i>circRNASEH2B</i> | miR-5010-5p                 | 1 |
| <i>circRNASEH2B</i> | miR-5011-5p                 | 3 |
| <i>circRNASEH2B</i> | miR-502-5p                  | 4 |
| <i>circRNASEH2B</i> | miR-504-3p                  | 1 |
| <i>circRNASEH2B</i> | miR-504-5p.1                | 1 |
| <i>circRNASEH2B</i> | miR-505-3p.1                | 1 |
| <i>circRNASEH2B</i> | miR-505-5p                  | 1 |
| <i>circRNASEH2B</i> | miR-506-5p                  | 4 |
| <i>circRNASEH2B</i> | miR-508-5p                  | 1 |
| <i>circRNASEH2B</i> | miR-5088-5p                 | 1 |
| <i>circRNASEH2B</i> | miR-5089-3p                 | 2 |
| <i>circRNASEH2B</i> | miR-5089-5p                 | 1 |
| <i>circRNASEH2B</i> | miR-509-3p                  | 2 |
| <i>circRNASEH2B</i> | miR-5092                    | 3 |
| <i>circRNASEH2B</i> | miR-5093                    | 2 |
| <i>circRNASEH2B</i> | miR-5096                    | 1 |
| <i>circRNASEH2B</i> | miR-510-3p                  | 5 |
| <i>circRNASEH2B</i> | miR-5100                    | 3 |
| <i>circRNASEH2B</i> | miR-511-3p                  | 1 |
| <i>circRNASEH2B</i> | miR-511-5p                  | 3 |
| <i>circRNASEH2B</i> | miR-512-5p                  | 3 |
| <i>circRNASEH2B</i> | miR-513a-3p/513c-3p/3606-3p | 1 |

|                     |                                                                  |   |
|---------------------|------------------------------------------------------------------|---|
| <i>circRNASEH2B</i> | miR-513b-3p                                                      | 5 |
| <i>circRNASEH2B</i> | miR-513c-5p/514b-5p                                              | 2 |
| <i>circRNASEH2B</i> | miR-514a-5p                                                      | 1 |
| <i>circRNASEH2B</i> | miR-516b-5p                                                      | 4 |
| <i>circRNASEH2B</i> | miR-517-3p                                                       | 1 |
| <i>circRNASEH2B</i> | miR-5187-3p                                                      | 2 |
| <i>circRNASEH2B</i> | miR-5187-5p                                                      | 2 |
| <i>circRNASEH2B</i> | miR-518a-5p/527                                                  | 1 |
| <i>circRNASEH2B</i> | miR-518c-5p                                                      | 1 |
| <i>circRNASEH2B</i> | miR-5192                                                         | 1 |
| <i>circRNASEH2B</i> | miR-5193                                                         | 4 |
| <i>circRNASEH2B</i> | miR-5197-3p                                                      | 3 |
| <i>circRNASEH2B</i> | miR-5197-5p                                                      | 4 |
| <i>circRNASEH2B</i> | miR-519d-5p                                                      | 2 |
| <i>circRNASEH2B</i> | miR-520f-5p                                                      | 2 |
| <i>circRNASEH2B</i> | miR-520g-5p                                                      | 1 |
| <i>circRNASEH2B</i> | miR-522-3p                                                       | 3 |
| <i>circRNASEH2B</i> | miR-524-5p                                                       | 6 |
| <i>circRNASEH2B</i> | miR-526b-5p                                                      | 2 |
| <i>circRNASEH2B</i> | miR-532-3p                                                       | 3 |
| <i>circRNASEH2B</i> | miR-539-5p                                                       | 1 |
| <i>circRNASEH2B</i> | miR-541-5p                                                       | 2 |
| <i>circRNASEH2B</i> | miR-542-3p                                                       | 1 |
| <i>circRNASEH2B</i> | miR-543                                                          | 2 |
| <i>circRNASEH2B</i> | miR-544a                                                         | 1 |
| <i>circRNASEH2B</i> | miR-544b                                                         | 4 |
| <i>circRNASEH2B</i> | miR-545-5p                                                       | 1 |
| <i>circRNASEH2B</i> | miR-548ac/548bb-3p/548d-3p/548h-3p/548z                          |   |
| <i>circRNASEH2B</i> | miR-548ai/548ag/548ba/570-5p                                     | 1 |
| <i>circRNASEH2B</i> | miR-548aj-5p/548f-5p/548g-5p/548x-5p                             | 2 |
| <i>circRNASEH2B</i> | miR-548ao-3p                                                     | 1 |
| <i>circRNASEH2B</i> | miR-548ao-5p/548ax                                               | 3 |
| <i>circRNASEH2B</i> | miR-548ap-3p/548aa/548t-3p                                       | 2 |
| <i>circRNASEH2B</i> | miR-548aq-3p/548am-3p/548aj-3p/548ah-3p/548ae-3p/548j-3p/548x-3p |   |
| <i>circRNASEH2B</i> | miR-548as-3p                                                     | 2 |
| <i>circRNASEH2B</i> | miR-548at-5p                                                     | 2 |
| <i>circRNASEH2B</i> | miR-548av-3p                                                     | 3 |
| <i>circRNASEH2B</i> | miR-548aw                                                        | 1 |



|                     |                                               |   |
|---------------------|-----------------------------------------------|---|
| <i>circRNASEH2B</i> | miR-548ay-3p/548at-3p                         | 2 |
| <i>circRNASEH2B</i> | miR-548az-3p/548ar-3p/548a-3p/548e-3p/548f-3p | 5 |
| <i>circRNASEH2B</i> | miR-548az-5p/548t-5p                          | 2 |
| <i>circRNASEH2B</i> | miR-548c-3p                                   | 5 |
| <i>circRNASEH2B</i> | miR-548e-5p                                   | 3 |
| <i>circRNASEH2B</i> | miR-548g-3p                                   | 1 |
| <i>circRNASEH2B</i> | miR-548m                                      | 1 |
| <i>circRNASEH2B</i> | miR-548n                                      | 2 |
| <i>circRNASEH2B</i> | miR-548p                                      | 3 |
| <i>circRNASEH2B</i> | miR-548u/7161-5p                              | 2 |
| <i>circRNASEH2B</i> | miR-550b-3p                                   | 1 |
| <i>circRNASEH2B</i> | miR-552-3p                                    | 2 |
| <i>circRNASEH2B</i> | miR-552-5p                                    | 2 |
| <i>circRNASEH2B</i> | miR-556-3p                                    | 1 |
| <i>circRNASEH2B</i> | miR-5571-3p                                   | 1 |
| <i>circRNASEH2B</i> | miR-5571-5p                                   | 4 |
| <i>circRNASEH2B</i> | miR-5572                                      | 3 |
| <i>circRNASEH2B</i> | miR-5579-5p                                   | 1 |
| <i>circRNASEH2B</i> | miR-5580-3p                                   | 4 |
| <i>circRNASEH2B</i> | miR-5581-3p                                   | 2 |
| <i>circRNASEH2B</i> | miR-5582-3p                                   | 5 |
| <i>circRNASEH2B</i> | miR-5582-5p                                   | 1 |
| <i>circRNASEH2B</i> | miR-5583-3p                                   | 1 |
| <i>circRNASEH2B</i> | miR-5584-5p                                   | 1 |
| <i>circRNASEH2B</i> | miR-5585-3p                                   | 1 |
| <i>circRNASEH2B</i> | miR-5585-5p                                   | 3 |
| <i>circRNASEH2B</i> | miR-5587-5p                                   | 1 |
| <i>circRNASEH2B</i> | miR-5589-3p                                   | 3 |
| <i>circRNASEH2B</i> | miR-5591-3p                                   | 1 |
| <i>circRNASEH2B</i> | miR-561-3p                                    | 2 |
| <i>circRNASEH2B</i> | miR-561-5p                                    | 2 |
| <i>circRNASEH2B</i> | miR-562                                       | 1 |
| <i>circRNASEH2B</i> | miR-5680                                      | 2 |
| <i>circRNASEH2B</i> | miR-5681a                                     | 1 |
| <i>circRNASEH2B</i> | miR-5681b                                     | 1 |
| <i>circRNASEH2B</i> | miR-5687                                      | 1 |
| <i>circRNASEH2B</i> | miR-5689                                      | 3 |
| <i>circRNASEH2B</i> | miR-569                                       | 1 |

|                     |                 |   |
|---------------------|-----------------|---|
| <i>circRNASEH2B</i> | miR-5692a       | 5 |
| <i>circRNASEH2B</i> | miR-5692bc      | 1 |
| <i>circRNASEH2B</i> | miR-5693        | 2 |
| <i>circRNASEH2B</i> | miR-5694        | 1 |
| <i>circRNASEH2B</i> | miR-5695        | 2 |
| <i>circRNASEH2B</i> | miR-5696        | 2 |
| <i>circRNASEH2B</i> | miR-5697        | 2 |
| <i>circRNASEH2B</i> | miR-5699-5p     | 1 |
| <i>circRNASEH2B</i> | miR-570-3p      | 4 |
| <i>circRNASEH2B</i> | miR-5700        | 2 |
| <i>circRNASEH2B</i> | miR-5701        | 1 |
| <i>circRNASEH2B</i> | miR-5702        | 1 |
| <i>circRNASEH2B</i> | miR-571         | 1 |
| <i>circRNASEH2B</i> | miR-573/3616-5p | 3 |
| <i>circRNASEH2B</i> | miR-574-5p      | 1 |
| <i>circRNASEH2B</i> | miR-575/4676-5p | 2 |
| <i>circRNASEH2B</i> | miR-576-5p      | 1 |
| <i>circRNASEH2B</i> | miR-577         | 3 |
| <i>circRNASEH2B</i> | miR-578         | 5 |
| <i>circRNASEH2B</i> | miR-579-3p      | 2 |
| <i>circRNASEH2B</i> | miR-580-3p      | 2 |
| <i>circRNASEH2B</i> | miR-580-5p      | 2 |
| <i>circRNASEH2B</i> | miR-582-3p      | 1 |
| <i>circRNASEH2B</i> | miR-582-5p      | 2 |
| <i>circRNASEH2B</i> | miR-583         | 2 |
| <i>circRNASEH2B</i> | miR-584-5p      | 2 |
| <i>circRNASEH2B</i> | miR-586         | 1 |
| <i>circRNASEH2B</i> | miR-589-3p      | 2 |
| <i>circRNASEH2B</i> | miR-589-5p      | 1 |
| <i>circRNASEH2B</i> | miR-590-3p      | 4 |
| <i>circRNASEH2B</i> | miR-591         | 2 |
| <i>circRNASEH2B</i> | miR-592         | 2 |
| <i>circRNASEH2B</i> | miR-596         | 1 |
| <i>circRNASEH2B</i> | miR-597-3p      | 2 |
| <i>circRNASEH2B</i> | miR-597-5p      | 2 |
| <i>circRNASEH2B</i> | miR-598-3p      | 1 |
| <i>circRNASEH2B</i> | miR-599         | 2 |
| <i>circRNASEH2B</i> | miR-605-3p      | 1 |

|                     |                                      |   |
|---------------------|--------------------------------------|---|
| <i>circRNASEH2B</i> | miR-605-5p                           | 3 |
| <i>circRNASEH2B</i> | miR-606                              | 1 |
| <i>circRNASEH2B</i> | miR-607                              | 3 |
| <i>circRNASEH2B</i> | miR-6071                             | 2 |
| <i>circRNASEH2B</i> | miR-6073                             | 2 |
| <i>circRNASEH2B</i> | miR-6076/6797-3p                     | 1 |
| <i>circRNASEH2B</i> | miR-6079                             | 3 |
| <i>circRNASEH2B</i> | miR-6081                             | 1 |
| <i>circRNASEH2B</i> | miR-6083                             | 2 |
| <i>circRNASEH2B</i> | miR-6085/6813-5p                     | 2 |
| <i>circRNASEH2B</i> | miR-6090                             | 1 |
| <i>circRNASEH2B</i> | miR-612/1285-3p/3187-5p/5189-5p/6860 | 3 |
| <i>circRNASEH2B</i> | miR-6124                             | 3 |
| <i>circRNASEH2B</i> | miR-6126                             | 1 |
| <i>circRNASEH2B</i> | miR-6128                             | 1 |
| <i>circRNASEH2B</i> | miR-6132/6836-5p                     | 1 |
| <i>circRNASEH2B</i> | miR-617                              | 1 |
| <i>circRNASEH2B</i> | miR-618                              | 2 |
| <i>circRNASEH2B</i> | miR-619-3p                           | 1 |
| <i>circRNASEH2B</i> | miR-619-5p/6506-5p                   | 1 |
| <i>circRNASEH2B</i> | miR-622                              | 2 |
| <i>circRNASEH2B</i> | miR-623                              | 1 |
| <i>circRNASEH2B</i> | miR-624-5p                           | 1 |
| <i>circRNASEH2B</i> | miR-625-5p                           | 1 |
| <i>circRNASEH2B</i> | miR-626/6876-3p                      | 1 |
| <i>circRNASEH2B</i> | miR-627-3p                           | 2 |
| <i>circRNASEH2B</i> | miR-628-5p                           | 1 |
| <i>circRNASEH2B</i> | miR-629-3p                           | 4 |
| <i>circRNASEH2B</i> | miR-630                              | 1 |
| <i>circRNASEH2B</i> | miR-631/3661                         | 1 |
| <i>circRNASEH2B</i> | miR-632/4288                         | 2 |
| <i>circRNASEH2B</i> | miR-635/6774-5p                      | 2 |
| <i>circRNASEH2B</i> | miR-642-3p                           | 2 |
| <i>circRNASEH2B</i> | miR-642a-5p                          | 1 |
| <i>circRNASEH2B</i> | miR-642b-5p                          | 1 |
| <i>circRNASEH2B</i> | miR-643                              | 3 |
| <i>circRNASEH2B</i> | miR-644a                             | 1 |
| <i>circRNASEH2B</i> | miR-645                              | 1 |

|                     |                  |   |
|---------------------|------------------|---|
| <i>circRNASEH2B</i> | miR-649          | 1 |
| <i>circRNASEH2B</i> | miR-6502-3p      | 2 |
| <i>circRNASEH2B</i> | miR-6503-3p      | 2 |
| <i>circRNASEH2B</i> | miR-6504-3p      | 2 |
| <i>circRNASEH2B</i> | miR-6505-3p      | 1 |
| <i>circRNASEH2B</i> | miR-6507-5p      | 5 |
| <i>circRNASEH2B</i> | miR-651-3p       | 1 |
| <i>circRNASEH2B</i> | miR-6511-3p      | 1 |
| <i>circRNASEH2B</i> | miR-6511-5p      | 3 |
| <i>circRNASEH2B</i> | miR-6512-5p      | 1 |
| <i>circRNASEH2B</i> | miR-6513-5p      | 2 |
| <i>circRNASEH2B</i> | miR-6514-3p      | 1 |
| <i>circRNASEH2B</i> | miR-6514-5p      | 4 |
| <i>circRNASEH2B</i> | miR-6515-3p      | 2 |
| <i>circRNASEH2B</i> | miR-6515-5p      | 2 |
| <i>circRNASEH2B</i> | miR-6516-3p      | 1 |
| <i>circRNASEH2B</i> | miR-652-5p       | 2 |
| <i>circRNASEH2B</i> | miR-653-3p       | 3 |
| <i>circRNASEH2B</i> | miR-653-5p       | 2 |
| <i>circRNASEH2B</i> | miR-654-3p       | 9 |
| <i>circRNASEH2B</i> | miR-655-5p       | 2 |
| <i>circRNASEH2B</i> | miR-656-3p       | 2 |
| <i>circRNASEH2B</i> | miR-657          | 1 |
| <i>circRNASEH2B</i> | miR-659-3p       | 1 |
| <i>circRNASEH2B</i> | miR-660-3p       | 4 |
| <i>circRNASEH2B</i> | miR-661          | 1 |
| <i>circRNASEH2B</i> | miR-663b         | 1 |
| <i>circRNASEH2B</i> | miR-664a-3p      | 1 |
| <i>circRNASEH2B</i> | miR-664a-5p/4794 | 1 |
| <i>circRNASEH2B</i> | miR-664b-5p      | 1 |
| <i>circRNASEH2B</i> | miR-668-3p       | 2 |
| <i>circRNASEH2B</i> | miR-670-3p       | 4 |
| <i>circRNASEH2B</i> | miR-670-5p       | 5 |
| <i>circRNASEH2B</i> | miR-671-5p       | 3 |
| <i>circRNASEH2B</i> | miR-6715a-3p     | 2 |
| <i>circRNASEH2B</i> | miR-6715b-3p     | 2 |
| <i>circRNASEH2B</i> | miR-6716-5p      | 2 |
| <i>circRNASEH2B</i> | miR-6719-3p      | 2 |

|                     |                     |   |
|---------------------|---------------------|---|
| <i>circRNASEH2B</i> | miR-6720-5p         | 4 |
| <i>circRNASEH2B</i> | miR-6721-5p         | 3 |
| <i>circRNASEH2B</i> | miR-6724-5p/6773-5p | 1 |
| <i>circRNASEH2B</i> | miR-6728-3p         | 1 |
| <i>circRNASEH2B</i> | miR-6728-5p         | 1 |
| <i>circRNASEH2B</i> | miR-6730-3p         | 2 |
| <i>circRNASEH2B</i> | miR-6730-5p         | 1 |
| <i>circRNASEH2B</i> | miR-6731-3p         | 2 |
| <i>circRNASEH2B</i> | miR-6731-5p/8085    | 1 |
| <i>circRNASEH2B</i> | miR-6732-3p         | 2 |
| <i>circRNASEH2B</i> | miR-6734-3p         | 1 |
| <i>circRNASEH2B</i> | miR-6735-3p         | 2 |
| <i>circRNASEH2B</i> | miR-6738-3p         | 1 |
| <i>circRNASEH2B</i> | miR-6740-3p         | 3 |
| <i>circRNASEH2B</i> | miR-6741-5p         | 1 |
| <i>circRNASEH2B</i> | miR-6742-3p         | 1 |
| <i>circRNASEH2B</i> | miR-6742-5p         | 1 |
| <i>circRNASEH2B</i> | miR-6746-3p         | 1 |
| <i>circRNASEH2B</i> | miR-6747-3p         | 1 |
| <i>circRNASEH2B</i> | miR-6748-3p         | 2 |
| <i>circRNASEH2B</i> | miR-6749-3p         | 1 |
| <i>circRNASEH2B</i> | miR-675-3p          | 1 |
| <i>circRNASEH2B</i> | miR-6750-5p/6822-5p | 1 |
| <i>circRNASEH2B</i> | miR-6751-5p/6803-5p | 2 |
| <i>circRNASEH2B</i> | miR-6753-3p/7107-3p | 2 |
| <i>circRNASEH2B</i> | miR-6753-5p         | 2 |
| <i>circRNASEH2B</i> | miR-6755-3p         | 4 |
| <i>circRNASEH2B</i> | miR-6757-5p         | 2 |
| <i>circRNASEH2B</i> | miR-6758-5p/6856-5p | 3 |
| <i>circRNASEH2B</i> | miR-6761-5p         | 2 |
| <i>circRNASEH2B</i> | miR-6764-3p/6824-3p | 1 |
| <i>circRNASEH2B</i> | miR-6765-3p         | 1 |
| <i>circRNASEH2B</i> | miR-6765-5p         | 5 |
| <i>circRNASEH2B</i> | miR-6769a-3p        | 1 |
| <i>circRNASEH2B</i> | miR-6770-5p         | 3 |
| <i>circRNASEH2B</i> | miR-6771-3p         | 1 |
| <i>circRNASEH2B</i> | miR-6773-3p         | 1 |
| <i>circRNASEH2B</i> | miR-6776-3p         | 3 |

|                     |                     |   |
|---------------------|---------------------|---|
| <i>circRNASEH2B</i> | miR-6777-3p         | 1 |
| <i>circRNASEH2B</i> | miR-6778-3p         | 1 |
| <i>circRNASEH2B</i> | miR-6780a-3p        | 6 |
| <i>circRNASEH2B</i> | miR-6780b-3p        | 1 |
| <i>circRNASEH2B</i> | miR-6781-5p         | 1 |
| <i>circRNASEH2B</i> | miR-6782-3p         | 5 |
| <i>circRNASEH2B</i> | miR-6782-5p         | 1 |
| <i>circRNASEH2B</i> | miR-6783-5p         | 1 |
| <i>circRNASEH2B</i> | miR-6784-3p/6862-3p | 1 |
| <i>circRNASEH2B</i> | miR-6787-3p         | 3 |
| <i>circRNASEH2B</i> | miR-6790-3p         | 1 |
| <i>circRNASEH2B</i> | miR-6791-3p/6829-3p | 1 |
| <i>circRNASEH2B</i> | miR-6792-5p         | 1 |
| <i>circRNASEH2B</i> | miR-6793-3p         | 1 |
| <i>circRNASEH2B</i> | miR-6795-3p         | 1 |
| <i>circRNASEH2B</i> | miR-6796-3p         | 2 |
| <i>circRNASEH2B</i> | miR-6798-3p         | 2 |
| <i>circRNASEH2B</i> | miR-6798-5p         | 2 |
| <i>circRNASEH2B</i> | miR-6799-5p         | 1 |
| <i>circRNASEH2B</i> | miR-6800-3p         | 4 |
| <i>circRNASEH2B</i> | miR-6806-5p         | 2 |
| <i>circRNASEH2B</i> | miR-6807-5p         | 2 |
| <i>circRNASEH2B</i> | miR-6809-3p         | 6 |
| <i>circRNASEH2B</i> | miR-6809-5p         | 2 |
| <i>circRNASEH2B</i> | miR-6810-5p         | 1 |
| <i>circRNASEH2B</i> | miR-6811-3p         | 1 |
| <i>circRNASEH2B</i> | miR-6815-3p         | 1 |
| <i>circRNASEH2B</i> | miR-6817-3p         | 1 |
| <i>circRNASEH2B</i> | miR-6818-3p         | 7 |
| <i>circRNASEH2B</i> | miR-6819-3p/6877-3p | 1 |
| <i>circRNASEH2B</i> | miR-6821-3p         | 1 |
| <i>circRNASEH2B</i> | miR-6822-3p         | 2 |
| <i>circRNASEH2B</i> | miR-6823-5p         | 1 |
| <i>circRNASEH2B</i> | miR-6825-3p         | 1 |
| <i>circRNASEH2B</i> | miR-6825-5p         | 1 |
| <i>circRNASEH2B</i> | miR-6826-3p         | 1 |
| <i>circRNASEH2B</i> | miR-6827-5p         | 3 |
| <i>circRNASEH2B</i> | miR-6828-3p         | 2 |

|                     |                     |   |
|---------------------|---------------------|---|
| <i>circRNASEH2B</i> | miR-6828-5p         | 3 |
| <i>circRNASEH2B</i> | miR-6829-5p         | 2 |
| <i>circRNASEH2B</i> | miR-6831-3p         | 1 |
| <i>circRNASEH2B</i> | miR-6832-3p         | 3 |
| <i>circRNASEH2B</i> | miR-6833-5p         | 1 |
| <i>circRNASEH2B</i> | miR-6834-3p         | 1 |
| <i>circRNASEH2B</i> | miR-6836-3p         | 1 |
| <i>circRNASEH2B</i> | miR-6844            | 6 |
| <i>circRNASEH2B</i> | miR-6845-3p         | 2 |
| <i>circRNASEH2B</i> | miR-6846-5p/6848-5p | 1 |
| <i>circRNASEH2B</i> | miR-6847-3p         | 1 |
| <i>circRNASEH2B</i> | miR-6849-3p         | 5 |
| <i>circRNASEH2B</i> | miR-6851-3p         | 1 |
| <i>circRNASEH2B</i> | miR-6852-5p         | 1 |
| <i>circRNASEH2B</i> | miR-6853-3p         | 2 |
| <i>circRNASEH2B</i> | miR-6854-5p         | 2 |
| <i>circRNASEH2B</i> | miR-6856-3p         | 1 |
| <i>circRNASEH2B</i> | miR-6857-3p         | 2 |
| <i>circRNASEH2B</i> | miR-6857-5p         | 1 |
| <i>circRNASEH2B</i> | miR-6858-3p         | 2 |
| <i>circRNASEH2B</i> | miR-6864-5p         | 1 |
| <i>circRNASEH2B</i> | miR-6866-5p         | 1 |
| <i>circRNASEH2B</i> | miR-6867-3p         | 3 |
| <i>circRNASEH2B</i> | miR-6868-3p         | 3 |
| <i>circRNASEH2B</i> | miR-6868-5p         | 1 |
| <i>circRNASEH2B</i> | miR-6869-5p         | 1 |
| <i>circRNASEH2B</i> | miR-6871-3p         | 1 |
| <i>circRNASEH2B</i> | miR-6871-5p         | 3 |
| <i>circRNASEH2B</i> | miR-6872-3p         | 3 |
| <i>circRNASEH2B</i> | miR-6873-5p         | 2 |
| <i>circRNASEH2B</i> | miR-6874-5p         | 2 |
| <i>circRNASEH2B</i> | miR-6875-3p         | 1 |
| <i>circRNASEH2B</i> | miR-6877-5p         | 1 |
| <i>circRNASEH2B</i> | miR-6878-3p         | 3 |
| <i>circRNASEH2B</i> | miR-6878-5p         | 1 |
| <i>circRNASEH2B</i> | miR-6879-3p         | 1 |
| <i>circRNASEH2B</i> | miR-6881-3p         | 6 |
| <i>circRNASEH2B</i> | miR-6882-3p         | 2 |

|                     |                           |   |
|---------------------|---------------------------|---|
| <i>circRNASEH2B</i> | miR-6882-5p               | 3 |
| <i>circRNASEH2B</i> | miR-6883-3p               | 1 |
| <i>circRNASEH2B</i> | miR-6885-3p               | 3 |
| <i>circRNASEH2B</i> | miR-6886-3p               | 1 |
| <i>circRNASEH2B</i> | miR-6887-3p               | 1 |
| <i>circRNASEH2B</i> | miR-6888-3p               | 3 |
| <i>circRNASEH2B</i> | miR-6889-3p               | 2 |
| <i>circRNASEH2B</i> | miR-6890-3p               | 1 |
| <i>circRNASEH2B</i> | miR-6894-3p               | 1 |
| <i>circRNASEH2B</i> | miR-6894-5p               | 2 |
| <i>circRNASEH2B</i> | miR-6895-5p               | 1 |
| <i>circRNASEH2B</i> | miR-7-3p                  | 3 |
| <i>circRNASEH2B</i> | miR-7106-5p               | 1 |
| <i>circRNASEH2B</i> | miR-7108-5p               | 2 |
| <i>circRNASEH2B</i> | miR-7109-3p               | 1 |
| <i>circRNASEH2B</i> | miR-7109-5p               | 2 |
| <i>circRNASEH2B</i> | miR-7110-3p               | 1 |
| <i>circRNASEH2B</i> | miR-7111-3p               | 6 |
| <i>circRNASEH2B</i> | miR-7113-3p               | 3 |
| <i>circRNASEH2B</i> | miR-7113-5p               | 2 |
| <i>circRNASEH2B</i> | miR-7114-5p               | 1 |
| <i>circRNASEH2B</i> | miR-7151-5p               | 1 |
| <i>circRNASEH2B</i> | miR-7152-5p               | 3 |
| <i>circRNASEH2B</i> | miR-7153-3p               | 6 |
| <i>circRNASEH2B</i> | miR-7154-3p               | 2 |
| <i>circRNASEH2B</i> | miR-7156-3p               | 1 |
| <i>circRNASEH2B</i> | miR-7158-3p               | 1 |
| <i>circRNASEH2B</i> | miR-7158-5p               | 3 |
| <i>circRNASEH2B</i> | miR-7159-3p               | 1 |
| <i>circRNASEH2B</i> | miR-7160-3p               | 1 |
| <i>circRNASEH2B</i> | miR-7161-3p               | 1 |
| <i>circRNASEH2B</i> | miR-7162-3p               | 3 |
| <i>circRNASEH2B</i> | miR-744-3p                | 1 |
| <i>circRNASEH2B</i> | miR-7515                  | 1 |
| <i>circRNASEH2B</i> | miR-758-3p                | 1 |
| <i>circRNASEH2B</i> | miR-760                   | 2 |
| <i>circRNASEH2B</i> | miR-762/4492/4498/5001-5p | 2 |
| <i>circRNASEH2B</i> | miR-764                   | 1 |



|                     |              |   |
|---------------------|--------------|---|
| <i>circRNASEH2B</i> | miR-7641     | 1 |
| <i>circRNASEH2B</i> | miR-765      | 2 |
| <i>circRNASEH2B</i> | miR-766-5p   | 2 |
| <i>circRNASEH2B</i> | miR-767-3p   | 1 |
| <i>circRNASEH2B</i> | miR-769-5p   | 2 |
| <i>circRNASEH2B</i> | miR-7703     | 1 |
| <i>circRNASEH2B</i> | miR-7705     | 2 |
| <i>circRNASEH2B</i> | miR-7843-3p  | 1 |
| <i>circRNASEH2B</i> | miR-7844-5p  | 2 |
| <i>circRNASEH2B</i> | miR-7845-5p  | 2 |
| <i>circRNASEH2B</i> | miR-7847-3p  | 1 |
| <i>circRNASEH2B</i> | miR-7848-3p  | 1 |
| <i>circRNASEH2B</i> | miR-7850-5p  | 2 |
| <i>circRNASEH2B</i> | miR-7851-3p  | 1 |
| <i>circRNASEH2B</i> | miR-7852-3p  | 2 |
| <i>circRNASEH2B</i> | miR-7856-5p  | 5 |
| <i>circRNASEH2B</i> | miR-7974     | 1 |
| <i>circRNASEH2B</i> | miR-7975     | 1 |
| <i>circRNASEH2B</i> | miR-802      | 1 |
| <i>circRNASEH2B</i> | miR-8055     | 2 |
| <i>circRNASEH2B</i> | miR-8056     | 1 |
| <i>circRNASEH2B</i> | miR-8057     | 4 |
| <i>circRNASEH2B</i> | miR-8060     | 2 |
| <i>circRNASEH2B</i> | miR-8063     | 1 |
| <i>circRNASEH2B</i> | miR-8066     | 3 |
| <i>circRNASEH2B</i> | miR-8070     | 2 |
| <i>circRNASEH2B</i> | miR-8075     | 1 |
| <i>circRNASEH2B</i> | miR-8081     | 1 |
| <i>circRNASEH2B</i> | miR-8083     | 2 |
| <i>circRNASEH2B</i> | miR-8087     | 3 |
| <i>circRNASEH2B</i> | miR-873-5p.1 | 2 |
| <i>circRNASEH2B</i> | miR-873-5p.2 | 2 |
| <i>circRNASEH2B</i> | miR-875-3p   | 2 |
| <i>circRNASEH2B</i> | miR-875-5p   | 4 |
| <i>circRNASEH2B</i> | miR-876-5p   | 4 |
| <i>circRNASEH2B</i> | miR-877-5p   | 1 |
| <i>circRNASEH2B</i> | miR-885-3p   | 1 |
| <i>circRNASEH2B</i> | miR-887-5p   | 2 |

|                        |                              |   |
|------------------------|------------------------------|---|
| <i>circRNASEH2B</i>    | miR-888-3p                   | 1 |
| <i>circRNASEH2B</i>    | miR-888-5p                   | 2 |
| <i>circRNASEH2B</i>    | miR-889-3p                   | 4 |
| <i>circRNASEH2B</i>    | miR-889-5p                   | 4 |
| <i>circRNASEH2B</i>    | miR-891a-3p                  | 1 |
| <i>circRNASEH2B</i>    | miR-892-5p                   | 4 |
| <i>circRNASEH2B</i>    | miR-892b                     | 4 |
| <i>circRNASEH2B</i>    | miR-9-5p                     | 1 |
| <i>circRNASEH2B</i>    | miR-920/4300/5591-5p/6726-5p | 1 |
| <i>circRNASEH2B</i>    | miR-92a-1-5p                 | 1 |
| <i>circRNASEH2B</i>    | miR-93-3p                    | 5 |
| <i>circRNASEH2B</i>    | miR-934                      | 1 |
| <i>circRNASEH2B</i>    | miR-935                      | 2 |
| <i>circRNASEH2B</i>    | miR-936                      | 1 |
| <i>circRNASEH2B</i>    | miR-938                      | 1 |
| <i>circRNASEH2B</i>    | miR-939-3p                   | 1 |
| <i>circRNASEH2B</i>    | miR-939-5p/1343-5p           | 1 |
| <i>circRNASEH2B</i>    | miR-940/6808-5p/6893-5p      | 3 |
| <i>circRNASEH2B</i>    | miR-941                      | 1 |
| <i>circRNASEH2B</i>    | miR-942-3p                   | 1 |
| <i>circRNASEH2B</i>    | miR-942-5p                   | 6 |
| <i>circRNASEH2B</i>    | miR-943                      | 2 |
| <i>circRNASEH2B</i>    | miR-944                      | 2 |
| <i>circRNASEH2B</i>    | miR-95-5p                    | 1 |
| <i>circRNASEH2B</i>    | miR-9500                     | 1 |
| <i>circRNASEH2B</i>    | miR-96-5p/1271-5p            | 2 |
| <i>circRNASEH2B</i>    | miR-99-3p                    | 2 |
| <i>circRP1-73A14.1</i> | miR-1258                     | 1 |
| <i>circRP1-73A14.1</i> | miR-1282                     | 1 |
| <i>circRP1-73A14.1</i> | miR-1290                     | 1 |
| <i>circRP1-73A14.1</i> | miR-133a-5p                  | 1 |
| <i>circRP1-73A14.1</i> | miR-138-5p                   | 1 |
| <i>circRP1-73A14.1</i> | miR-1537-5p                  | 1 |
| <i>circRP1-73A14.1</i> | miR-1538/4745-3p             | 1 |
| <i>circRP1-73A14.1</i> | miR-1914-5p                  | 2 |
| <i>circRP1-73A14.1</i> | miR-218-5p                   | 1 |
| <i>circRP1-73A14.1</i> | miR-223-5p                   | 1 |
| <i>circRP1-73A14.1</i> | miR-224-5p                   | 1 |

|                        |                             |   |
|------------------------|-----------------------------|---|
| <i>circRP1-73A14.1</i> | miR-31-3p                   | 1 |
| <i>circRP1-73A14.1</i> | miR-3159                    | 1 |
| <i>circRP1-73A14.1</i> | miR-3622a-3p/3622b-3p       | 1 |
| <i>circRP1-73A14.1</i> | miR-3657                    | 1 |
| <i>circRP1-73A14.1</i> | miR-3688-3p                 | 1 |
| <i>circRP1-73A14.1</i> | miR-371-5p                  | 1 |
| <i>circRP1-73A14.1</i> | miR-371b-5p/373-5p/616-5p   | 1 |
| <i>circRP1-73A14.1</i> | miR-372-5p                  | 1 |
| <i>circRP1-73A14.1</i> | miR-3912-5p                 | 1 |
| <i>circRP1-73A14.1</i> | miR-4502                    | 1 |
| <i>circRP1-73A14.1</i> | miR-4669                    | 1 |
| <i>circRP1-73A14.1</i> | miR-4686                    | 1 |
| <i>circRP1-73A14.1</i> | miR-4718                    | 1 |
| <i>circRP1-73A14.1</i> | miR-4742-3p                 | 1 |
| <i>circRP1-73A14.1</i> | miR-487a-5p/487b-5p         | 1 |
| <i>circRP1-73A14.1</i> | miR-490-3p                  | 1 |
| <i>circRP1-73A14.1</i> | miR-490-5p                  | 1 |
| <i>circRP1-73A14.1</i> | miR-497-3p                  | 1 |
| <i>circRP1-73A14.1</i> | miR-4999-5p                 | 1 |
| <i>circRP1-73A14.1</i> | miR-5008-3p/6737-3p/7157-3p | 1 |
| <i>circRP1-73A14.1</i> | miR-5581-3p                 | 1 |
| <i>circRP1-73A14.1</i> | miR-5707                    | 1 |
| <i>circRP1-73A14.1</i> | miR-573/3616-5p             | 1 |
| <i>circRP1-73A14.1</i> | miR-582-3p                  | 2 |
| <i>circRP1-73A14.1</i> | miR-6071                    | 1 |
| <i>circRP1-73A14.1</i> | miR-6075                    | 1 |
| <i>circRP1-73A14.1</i> | miR-6131                    | 1 |
| <i>circRP1-73A14.1</i> | miR-649                     | 1 |
| <i>circRP1-73A14.1</i> | miR-651-5p                  | 1 |
| <i>circRP1-73A14.1</i> | miR-668-3p                  | 1 |
| <i>circRP1-73A14.1</i> | miR-6715a-3p                | 1 |
| <i>circRP1-73A14.1</i> | miR-6715b-3p                | 1 |
| <i>circRP1-73A14.1</i> | miR-6765-3p                 | 1 |
| <i>circRP1-73A14.1</i> | miR-6794-3p                 | 1 |
| <i>circRP1-73A14.1</i> | miR-6828-3p                 | 1 |
| <i>circRP1-73A14.1</i> | miR-6850-3p                 | 1 |
| <i>circRP1-73A14.1</i> | miR-6879-3p                 | 1 |
| <i>circRP1-73A14.1</i> | miR-6885-3p                 | 1 |

|                                        |                          |   |
|----------------------------------------|--------------------------|---|
| <i>circRP1-73A14.1</i>                 | miR-6889-3p              | 1 |
| <i>circRP1-73A14.1</i>                 | miR-8068                 | 1 |
| <i>circRP1-73A14.1</i>                 | miR-876-5p               | 1 |
| <i>circRP1-73A14.1</i>                 | miR-888-5p               | 1 |
| <i>circ-</i><br><i>cRP11-1023L17.1</i> | miR-103-3p/107           | 1 |
| <i>circ-</i><br><i>cRP11-1023L17.1</i> | miR-1178-3p              | 1 |
| <i>circ-</i><br><i>cRP11-1023L17.1</i> | miR-1180-5p              | 1 |
| <i>circ-</i><br><i>cRP11-1023L17.1</i> | miR-1207-3p              | 1 |
| <i>circ-</i><br><i>cRP11-1023L17.1</i> | miR-1227-3p              | 1 |
| <i>circ-</i><br><i>cRP11-1023L17.1</i> | miR-1228-3p              | 1 |
| <i>circ-</i><br><i>cRP11-1023L17.1</i> | miR-1237-5p/4488/4697-5p | 1 |
| <i>circ-</i><br><i>cRP11-1023L17.1</i> | miR-1257                 | 2 |
| <i>circ-</i><br><i>cRP11-1023L17.1</i> | miR-126-3p.1             | 1 |
| <i>circ-</i><br><i>cRP11-1023L17.1</i> | miR-1262/4701-3p/6736-5p | 1 |
| <i>circ-</i><br><i>cRP11-1023L17.1</i> | miR-1265                 | 1 |
| <i>circ-</i><br><i>cRP11-1023L17.1</i> | miR-1295b-5p/1912        | 1 |
| <i>circ-</i><br><i>cRP11-1023L17.1</i> | miR-130-3p/301-3p/454-3p | 2 |
| <i>circ-</i><br><i>cRP11-1023L17.1</i> | miR-1302/4298            | 1 |
| <i>circ-</i><br><i>cRP11-1023L17.1</i> | miR-1306-5p              | 1 |
| <i>circ-</i><br><i>cRP11-1023L17.1</i> | miR-1324                 | 2 |
| <i>circ-</i><br><i>cRP11-1023L17.1</i> | miR-133a-5p              | 2 |

|                                       |                     |   |
|---------------------------------------|---------------------|---|
| <i>cir-</i><br><i>cRP11-1023L17.1</i> | miR-138-5p          | 2 |
| <i>cir-</i><br><i>cRP11-1023L17.1</i> | miR-143-5p          | 2 |
| <i>cir-</i><br><i>cRP11-1023L17.1</i> | miR-146a-3p         | 1 |
| <i>cir-</i><br><i>cRP11-1023L17.1</i> | miR-1470            | 1 |
| <i>cir-</i><br><i>cRP11-1023L17.1</i> | miR-150-5p          | 1 |
| <i>cir-</i><br><i>cRP11-1023L17.1</i> | miR-18-5p           | 1 |
| <i>cir-</i><br><i>cRP11-1023L17.1</i> | miR-183-3p          | 2 |
| <i>cir-</i><br><i>cRP11-1023L17.1</i> | miR-1911-3p         | 1 |
| <i>cir-</i><br><i>cRP11-1023L17.1</i> | miR-1914-5p         | 1 |
| <i>cir-</i><br><i>cRP11-1023L17.1</i> | miR-1915-3p/6764-5p | 1 |
| <i>cir-</i><br><i>cRP11-1023L17.1</i> | miR-192-3p          | 1 |
| <i>cir-</i><br><i>cRP11-1023L17.1</i> | miR-192-5p/215-5p   | 1 |
| <i>cir-</i><br><i>cRP11-1023L17.1</i> | miR-204-3p/4646-5p  | 1 |
| <i>cir-</i><br><i>cRP11-1023L17.1</i> | miR-21-3p/3591-3p   | 1 |
| <i>cir-</i><br><i>cRP11-1023L17.1</i> | miR-2113            | 1 |
| <i>cir-</i><br><i>cRP11-1023L17.1</i> | miR-2115-3p         | 1 |
| <i>cir-</i><br><i>cRP11-1023L17.1</i> | miR-2116-3p         | 1 |
| <i>cir-</i><br><i>cRP11-1023L17.1</i> | miR-212-5p          | 1 |
| <i>cir-</i><br><i>cRP11-1023L17.1</i> | miR-214-3p/3619-5p  | 1 |

|                                       |                                 |   |
|---------------------------------------|---------------------------------|---|
| <i>cir-</i><br><i>cRP11-1023L17.1</i> | miR-214-5p                      | 1 |
| <i>cir-</i><br><i>cRP11-1023L17.1</i> | miR-26-5p                       | 3 |
| <i>cir-</i><br><i>cRP11-1023L17.1</i> | miR-302-3p/372-3p/373-3p/520-3p | 2 |
| <i>cir-</i><br><i>cRP11-1023L17.1</i> | miR-3065-5p                     | 1 |
| <i>cir-</i><br><i>cRP11-1023L17.1</i> | miR-3121-5p                     | 1 |
| <i>cir-</i><br><i>cRP11-1023L17.1</i> | miR-3130-5p/4482-5p             | 1 |
| <i>cir-</i><br><i>cRP11-1023L17.1</i> | miR-3138                        | 1 |
| <i>cir-</i><br><i>cRP11-1023L17.1</i> | miR-3145-5p                     | 1 |
| <i>cir-</i><br><i>cRP11-1023L17.1</i> | miR-3150a-5p/3150b-5p           | 1 |
| <i>cir-</i><br><i>cRP11-1023L17.1</i> | miR-3166                        | 1 |
| <i>cir-</i><br><i>cRP11-1023L17.1</i> | miR-3189-3p                     | 1 |
| <i>cir-</i><br><i>cRP11-1023L17.1</i> | miR-3192-5p                     | 1 |
| <i>cir-</i><br><i>cRP11-1023L17.1</i> | miR-3194-5p                     | 1 |
| <i>cir-</i><br><i>cRP11-1023L17.1</i> | miR-326                         | 1 |
| <i>cir-</i><br><i>cRP11-1023L17.1</i> | miR-330-3p                      | 1 |
| <i>cir-</i><br><i>cRP11-1023L17.1</i> | miR-342-3p                      | 1 |
| <i>cir-</i><br><i>cRP11-1023L17.1</i> | miR-3529-3p                     | 1 |
| <i>cir-</i><br><i>cRP11-1023L17.1</i> | miR-3605-3p                     | 2 |
| <i>cir-</i><br><i>cRP11-1023L17.1</i> | miR-3614-3p                     | 1 |

|                                       |                     |   |
|---------------------------------------|---------------------|---|
| <i>cir-</i><br><i>cRP11-1023L17.1</i> | miR-3620-3p         | 1 |
| <i>cir-</i><br><i>cRP11-1023L17.1</i> | miR-3649            | 1 |
| <i>cir-</i><br><i>cRP11-1023L17.1</i> | miR-3652/4430       | 3 |
| <i>cir-</i><br><i>cRP11-1023L17.1</i> | miR-3677-3p         | 1 |
| <i>cir-</i><br><i>cRP11-1023L17.1</i> | miR-3678-5p         | 1 |
| <i>cir-</i><br><i>cRP11-1023L17.1</i> | miR-377-3p          | 1 |
| <i>cir-</i><br><i>cRP11-1023L17.1</i> | miR-382-5p          | 1 |
| <i>cir-</i><br><i>cRP11-1023L17.1</i> | miR-3907            | 1 |
| <i>cir-</i><br><i>cRP11-1023L17.1</i> | miR-3918            | 1 |
| <i>cir-</i><br><i>cRP11-1023L17.1</i> | miR-3929/4419b/4478 | 1 |
| <i>cir-</i><br><i>cRP11-1023L17.1</i> | miR-3936            | 1 |
| <i>cir-</i><br><i>cRP11-1023L17.1</i> | miR-3944-5p         | 2 |
| <i>cir-</i><br><i>cRP11-1023L17.1</i> | miR-3973            | 1 |
| <i>cir-</i><br><i>cRP11-1023L17.1</i> | miR-4258            | 1 |
| <i>cir-</i><br><i>cRP11-1023L17.1</i> | miR-4259            | 1 |
| <i>cir-</i><br><i>cRP11-1023L17.1</i> | miR-4267            | 1 |
| <i>cir-</i><br><i>cRP11-1023L17.1</i> | miR-4277            | 1 |
| <i>cir-</i><br><i>cRP11-1023L17.1</i> | miR-4283            | 1 |
| <i>cir-</i><br><i>cRP11-1023L17.1</i> | miR-4293            | 1 |

|                                       |                  |   |
|---------------------------------------|------------------|---|
| <i>cir-</i><br><i>cRP11-1023L17.1</i> | miR-4299         | 3 |
| <i>cir-</i><br><i>cRP11-1023L17.1</i> | miR-4312         | 1 |
| <i>cir-</i><br><i>cRP11-1023L17.1</i> | miR-432-5p       | 1 |
| <i>cir-</i><br><i>cRP11-1023L17.1</i> | miR-4440         | 1 |
| <i>cir-</i><br><i>cRP11-1023L17.1</i> | miR-4452         | 2 |
| <i>cir-</i><br><i>cRP11-1023L17.1</i> | miR-4456         | 3 |
| <i>cir-</i><br><i>cRP11-1023L17.1</i> | miR-4485-5p      | 1 |
| <i>cir-</i><br><i>cRP11-1023L17.1</i> | miR-4489         | 1 |
| <i>cir-</i><br><i>cRP11-1023L17.1</i> | miR-4502         | 1 |
| <i>cir-</i><br><i>cRP11-1023L17.1</i> | miR-4505/5787    | 3 |
| <i>cir-</i><br><i>cRP11-1023L17.1</i> | miR-4512         | 1 |
| <i>cir-</i><br><i>cRP11-1023L17.1</i> | miR-4520-2-3p    | 1 |
| <i>cir-</i><br><i>cRP11-1023L17.1</i> | miR-4520-3p      | 1 |
| <i>cir-</i><br><i>cRP11-1023L17.1</i> | miR-4529-3p      | 1 |
| <i>cir-</i><br><i>cRP11-1023L17.1</i> | miR-4535         | 1 |
| <i>cir-</i><br><i>cRP11-1023L17.1</i> | miR-455-3p.2     | 2 |
| <i>cir-</i><br><i>cRP11-1023L17.1</i> | miR-4640-5p      | 1 |
| <i>cir-</i><br><i>cRP11-1023L17.1</i> | miR-4645-5p/4673 | 1 |
| <i>cir-</i><br><i>cRP11-1023L17.1</i> | miR-4656         | 1 |



|                                       |                     |   |
|---------------------------------------|---------------------|---|
| <i>cir-</i><br><i>cRP11-1023L17.1</i> | miR-4667-3p         | 1 |
| <i>cir-</i><br><i>cRP11-1023L17.1</i> | miR-4675/4741       | 1 |
| <i>cir-</i><br><i>cRP11-1023L17.1</i> | miR-4677-3p         | 1 |
| <i>cir-</i><br><i>cRP11-1023L17.1</i> | miR-4679            | 1 |
| <i>cir-</i><br><i>cRP11-1023L17.1</i> | miR-4685-5p/6837-5p | 1 |
| <i>cir-</i><br><i>cRP11-1023L17.1</i> | miR-4711-3p         | 1 |
| <i>cir-</i><br><i>cRP11-1023L17.1</i> | miR-4714-3p         | 1 |
| <i>cir-</i><br><i>cRP11-1023L17.1</i> | miR-4715-5p         | 1 |
| <i>cir-</i><br><i>cRP11-1023L17.1</i> | miR-4716-3p/6794-5p | 1 |
| <i>cir-</i><br><i>cRP11-1023L17.1</i> | miR-4726-3p         | 1 |
| <i>cir-</i><br><i>cRP11-1023L17.1</i> | miR-4731-5p         | 2 |
| <i>cir-</i><br><i>cRP11-1023L17.1</i> | miR-4771            | 1 |
| <i>cir-</i><br><i>cRP11-1023L17.1</i> | miR-4776-5p         | 1 |
| <i>cir-</i><br><i>cRP11-1023L17.1</i> | miR-4795-5p         | 1 |
| <i>cir-</i><br><i>cRP11-1023L17.1</i> | miR-4800-5p         | 1 |
| <i>cir-</i><br><i>cRP11-1023L17.1</i> | miR-484/3155        | 1 |
| <i>cir-</i><br><i>cRP11-1023L17.1</i> | miR-493-3p          | 1 |
| <i>cir-</i><br><i>cRP11-1023L17.1</i> | miR-495-3p          | 1 |
| <i>cir-</i><br><i>cRP11-1023L17.1</i> | miR-495-5p          | 1 |

|                                       |                   |   |
|---------------------------------------|-------------------|---|
| <i>cir-</i><br><i>cRP11-1023L17.1</i> | miR-498           | 1 |
| <i>cir-</i><br><i>cRP11-1023L17.1</i> | miR-5000-5p       | 1 |
| <i>cir-</i><br><i>cRP11-1023L17.1</i> | miR-501-3p/502-3p | 1 |
| <i>cir-</i><br><i>cRP11-1023L17.1</i> | miR-5010-3p       | 1 |
| <i>cir-</i><br><i>cRP11-1023L17.1</i> | miR-508-5p        | 1 |
| <i>cir-</i><br><i>cRP11-1023L17.1</i> | miR-510-3p        | 1 |
| <i>cir-</i><br><i>cRP11-1023L17.1</i> | miR-511-5p        | 1 |
| <i>cir-</i><br><i>cRP11-1023L17.1</i> | miR-5189-3p       | 1 |
| <i>cir-</i><br><i>cRP11-1023L17.1</i> | miR-518c-5p       | 1 |
| <i>cir-</i><br><i>cRP11-1023L17.1</i> | miR-519-3p        | 2 |
| <i>cir-</i><br><i>cRP11-1023L17.1</i> | miR-5195-5p       | 1 |
| <i>cir-</i><br><i>cRP11-1023L17.1</i> | miR-520g-3p       | 1 |
| <i>cir-</i><br><i>cRP11-1023L17.1</i> | miR-532-3p        | 1 |
| <i>cir-</i><br><i>cRP11-1023L17.1</i> | miR-545-5p        | 2 |
| <i>cir-</i><br><i>cRP11-1023L17.1</i> | miR-548q          | 3 |
| <i>cir-</i><br><i>cRP11-1023L17.1</i> | miR-549a          | 2 |
| <i>cir-</i><br><i>cRP11-1023L17.1</i> | miR-551b-5p       | 1 |
| <i>cir-</i><br><i>cRP11-1023L17.1</i> | miR-5589-5p       | 2 |
| <i>cir-</i><br><i>cRP11-1023L17.1</i> | miR-595           | 1 |

|                                       |                     |   |
|---------------------------------------|---------------------|---|
| <i>cir-</i><br><i>cRP11-1023L17.1</i> | miR-596             | 1 |
| <i>cir-</i><br><i>cRP11-1023L17.1</i> | miR-6079            | 1 |
| <i>cir-</i><br><i>cRP11-1023L17.1</i> | miR-6126            | 1 |
| <i>cir-</i><br><i>cRP11-1023L17.1</i> | miR-6131            | 2 |
| <i>cir-</i><br><i>cRP11-1023L17.1</i> | miR-619-5p/6506-5p  | 1 |
| <i>cir-</i><br><i>cRP11-1023L17.1</i> | miR-624-3p          | 1 |
| <i>cir-</i><br><i>cRP11-1023L17.1</i> | miR-648             | 1 |
| <i>cir-</i><br><i>cRP11-1023L17.1</i> | miR-6507-3p         | 1 |
| <i>cir-</i><br><i>cRP11-1023L17.1</i> | miR-6508-3p         | 1 |
| <i>cir-</i><br><i>cRP11-1023L17.1</i> | miR-6513-3p         | 2 |
| <i>cir-</i><br><i>cRP11-1023L17.1</i> | miR-663b            | 1 |
| <i>cir-</i><br><i>cRP11-1023L17.1</i> | miR-6732-5p         | 1 |
| <i>cir-</i><br><i>cRP11-1023L17.1</i> | miR-6741-5p         | 1 |
| <i>cir-</i><br><i>cRP11-1023L17.1</i> | miR-6753-5p         | 2 |
| <i>cir-</i><br><i>cRP11-1023L17.1</i> | miR-6759-3p         | 1 |
| <i>cir-</i><br><i>cRP11-1023L17.1</i> | miR-6761-3p         | 1 |
| <i>cir-</i><br><i>cRP11-1023L17.1</i> | miR-6764-3p/6824-3p | 1 |
| <i>cir-</i><br><i>cRP11-1023L17.1</i> | miR-6776-5p         | 1 |
| <i>cir-</i><br><i>cRP11-1023L17.1</i> | miR-6782-3p         | 1 |

|                                       |                     |   |
|---------------------------------------|---------------------|---|
| <i>cir-</i><br><i>cRP11-1023L17.1</i> | miR-6795-3p         | 1 |
| <i>cir-</i><br><i>cRP11-1023L17.1</i> | miR-6800-3p         | 1 |
| <i>cir-</i><br><i>cRP11-1023L17.1</i> | miR-6805-5p         | 1 |
| <i>cir-</i><br><i>cRP11-1023L17.1</i> | miR-6808-3p         | 2 |
| <i>cir-</i><br><i>cRP11-1023L17.1</i> | miR-6811-3p         | 1 |
| <i>cir-</i><br><i>cRP11-1023L17.1</i> | miR-6829-5p         | 1 |
| <i>cir-</i><br><i>cRP11-1023L17.1</i> | miR-6830-3p         | 1 |
| <i>cir-</i><br><i>cRP11-1023L17.1</i> | miR-6840-3p         | 1 |
| <i>cir-</i><br><i>cRP11-1023L17.1</i> | miR-6846-3p         | 1 |
| <i>cir-</i><br><i>cRP11-1023L17.1</i> | miR-6846-5p/6848-5p | 1 |
| <i>cir-</i><br><i>cRP11-1023L17.1</i> | miR-6849-3p         | 1 |
| <i>cir-</i><br><i>cRP11-1023L17.1</i> | miR-6859-3p         | 1 |
| <i>cir-</i><br><i>cRP11-1023L17.1</i> | miR-6861-5p         | 1 |
| <i>cir-</i><br><i>cRP11-1023L17.1</i> | miR-6864-5p         | 1 |
| <i>cir-</i><br><i>cRP11-1023L17.1</i> | miR-6867-5p         | 1 |
| <i>cir-</i><br><i>cRP11-1023L17.1</i> | miR-6887-3p         | 1 |
| <i>cir-</i><br><i>cRP11-1023L17.1</i> | miR-6895-5p         | 1 |
| <i>cir-</i><br><i>cRP11-1023L17.1</i> | miR-7108-3p         | 1 |
| <i>cir-</i><br><i>cRP11-1023L17.1</i> | miR-7109-3p         | 1 |

|                                       |                           |   |
|---------------------------------------|---------------------------|---|
| <i>cir-</i><br><i>cRP11-1023L17.1</i> | miR-711                   | 2 |
| <i>cir-</i><br><i>cRP11-1023L17.1</i> | miR-7113-5p               | 1 |
| <i>cir-</i><br><i>cRP11-1023L17.1</i> | miR-7160-3p               | 1 |
| <i>cir-</i><br><i>cRP11-1023L17.1</i> | miR-758-3p                | 1 |
| <i>cir-</i><br><i>cRP11-1023L17.1</i> | miR-762/4492/4498/5001-5p | 1 |
| <i>cir-</i><br><i>cRP11-1023L17.1</i> | miR-7855-5p               | 3 |
| <i>cir-</i><br><i>cRP11-1023L17.1</i> | miR-7973                  | 2 |
| <i>cir-</i><br><i>cRP11-1023L17.1</i> | miR-7977                  | 1 |
| <i>cir-</i><br><i>cRP11-1023L17.1</i> | miR-7978                  | 3 |
| <i>cir-</i><br><i>cRP11-1023L17.1</i> | miR-802                   | 2 |
| <i>cir-</i><br><i>cRP11-1023L17.1</i> | miR-8069                  | 1 |
| <i>cir-</i><br><i>cRP11-1023L17.1</i> | miR-922                   | 1 |
| <i>cir-</i><br><i>cRP11-1023L17.1</i> | miR-935                   | 1 |
| <i>circRSRC1</i>                      | miR-103a-2-5p             | 1 |
| <i>circRSRC1</i>                      | miR-1237-3p               | 5 |
| <i>circRSRC1</i>                      | miR-1238-3p               | 3 |
| <i>circRSRC1</i>                      | miR-1248                  | 5 |
| <i>circRSRC1</i>                      | miR-1273e                 | 1 |
| <i>circRSRC1</i>                      | miR-129-5p                | 1 |
| <i>circRSRC1</i>                      | miR-1290                  | 1 |
| <i>circRSRC1</i>                      | miR-1299                  | 3 |
| <i>circRSRC1</i>                      | miR-142-5p                | 1 |
| <i>circRSRC1</i>                      | miR-151-5p                | 2 |
| <i>circRSRC1</i>                      | miR-1537-5p               | 2 |
| <i>circRSRC1</i>                      | miR-1539                  | 1 |

|                  |                     |   |
|------------------|---------------------|---|
| <i>circRSRC1</i> | miR-154-3p/487-3p   | 3 |
| <i>circRSRC1</i> | miR-16-1-3p         | 1 |
| <i>circRSRC1</i> | miR-185-3p          | 3 |
| <i>circRSRC1</i> | miR-192-5p/215-5p   | 2 |
| <i>circRSRC1</i> | miR-203b-3p         | 1 |
| <i>circRSRC1</i> | miR-222-5p          | 1 |
| <i>circRSRC1</i> | miR-2467-5p         | 2 |
| <i>circRSRC1</i> | miR-297             | 2 |
| <i>circRSRC1</i> | miR-29a-5p          | 2 |
| <i>circRSRC1</i> | miR-301a-5p/301b-5p | 1 |
| <i>circRSRC1</i> | miR-3064-5p         | 2 |
| <i>circRSRC1</i> | miR-3127-3p/6756-3p | 1 |
| <i>circRSRC1</i> | miR-3140-3p         | 1 |
| <i>circRSRC1</i> | miR-3150b-3p        | 2 |
| <i>circRSRC1</i> | miR-3156-5p         | 4 |
| <i>circRSRC1</i> | miR-3159            | 1 |
| <i>circRSRC1</i> | miR-3160-5p         | 1 |
| <i>circRSRC1</i> | miR-3182            | 3 |
| <i>circRSRC1</i> | miR-3185            | 2 |
| <i>circRSRC1</i> | miR-3188            | 2 |
| <i>circRSRC1</i> | miR-3191-5p         | 4 |
| <i>circRSRC1</i> | miR-3192-3p         | 1 |
| <i>circRSRC1</i> | miR-3200-5p         | 3 |
| <i>circRSRC1</i> | miR-326             | 2 |
| <i>circRSRC1</i> | miR-340-3p/6827-3p  | 2 |
| <i>circRSRC1</i> | miR-3611            | 2 |
| <i>circRSRC1</i> | miR-3618            | 2 |
| <i>circRSRC1</i> | miR-3619-3p         | 2 |
| <i>circRSRC1</i> | miR-3653-3p         | 3 |
| <i>circRSRC1</i> | miR-3667-3p         | 4 |
| <i>circRSRC1</i> | miR-3675-3p         | 4 |
| <i>circRSRC1</i> | miR-3684            | 1 |
| <i>circRSRC1</i> | miR-369-5p          | 1 |
| <i>circRSRC1</i> | miR-378-3p          | 4 |
| <i>circRSRC1</i> | miR-3921/4653-5p    | 1 |
| <i>circRSRC1</i> | miR-3929/4419b/4478 | 2 |
| <i>circRSRC1</i> | miR-3975            | 2 |
| <i>circRSRC1</i> | miR-3977            | 1 |

|                  |                       |   |
|------------------|-----------------------|---|
| <i>circRSRC1</i> | miR-411-3p            | 2 |
| <i>circRSRC1</i> | miR-4273/7156-5p      | 3 |
| <i>circRSRC1</i> | miR-4305              | 1 |
| <i>circRSRC1</i> | miR-433-5p            | 2 |
| <i>circRSRC1</i> | miR-4446-5p           | 1 |
| <i>circRSRC1</i> | miR-4482-3p           | 2 |
| <i>circRSRC1</i> | miR-4501              | 2 |
| <i>circRSRC1</i> | miR-4502              | 1 |
| <i>circRSRC1</i> | miR-4511              | 3 |
| <i>circRSRC1</i> | miR-4520-5p           | 1 |
| <i>circRSRC1</i> | miR-4535              | 4 |
| <i>circRSRC1</i> | miR-4539              | 1 |
| <i>circRSRC1</i> | miR-4635              | 1 |
| <i>circRSRC1</i> | miR-4638-3p           | 4 |
| <i>circRSRC1</i> | miR-4655-3p           | 1 |
| <i>circRSRC1</i> | miR-4659a-3p/4659b-3p | 3 |
| <i>circRSRC1</i> | miR-4677-5p           | 3 |
| <i>circRSRC1</i> | miR-4680-5p           | 1 |
| <i>circRSRC1</i> | miR-4687-3p           | 2 |
| <i>circRSRC1</i> | miR-4691-5p/6792-3p   | 2 |
| <i>circRSRC1</i> | miR-4694-5p           | 2 |
| <i>circRSRC1</i> | miR-4695-3p           | 3 |
| <i>circRSRC1</i> | miR-4695-5p           | 4 |
| <i>circRSRC1</i> | miR-4699-5p           | 2 |
| <i>circRSRC1</i> | miR-4709-3p           | 4 |
| <i>circRSRC1</i> | miR-4718              | 2 |
| <i>circRSRC1</i> | miR-4742-3p           | 2 |
| <i>circRSRC1</i> | miR-4751              | 2 |
| <i>circRSRC1</i> | miR-4753-3p           | 6 |
| <i>circRSRC1</i> | miR-4755-5p/5006-3p   | 3 |
| <i>circRSRC1</i> | miR-4763-5p           | 1 |
| <i>circRSRC1</i> | miR-4768-5p/6833-3p   | 9 |
| <i>circRSRC1</i> | miR-4776-5p           | 4 |
| <i>circRSRC1</i> | miR-4778-3p           | 2 |
| <i>circRSRC1</i> | miR-4779              | 4 |
| <i>circRSRC1</i> | miR-4780              | 1 |
| <i>circRSRC1</i> | miR-4782-5p/5706      | 3 |
| <i>circRSRC1</i> | miR-485-5p            | 2 |

|                  |                     |   |
|------------------|---------------------|---|
| <i>circRSRC1</i> | miR-4999-5p         | 2 |
| <i>circRSRC1</i> | miR-5004-5p         | 2 |
| <i>circRSRC1</i> | miR-516b-5p         | 3 |
| <i>circRSRC1</i> | miR-518c-5p         | 2 |
| <i>circRSRC1</i> | miR-5193            | 2 |
| <i>circRSRC1</i> | miR-5195-5p         | 1 |
| <i>circRSRC1</i> | miR-5197-3p         | 1 |
| <i>circRSRC1</i> | miR-526b-5p         | 5 |
| <i>circRSRC1</i> | miR-532-5p          | 1 |
| <i>circRSRC1</i> | miR-544a            | 2 |
| <i>circRSRC1</i> | miR-548b-3p         | 3 |
| <i>circRSRC1</i> | miR-567             | 2 |
| <i>circRSRC1</i> | miR-5684            | 1 |
| <i>circRSRC1</i> | miR-578             | 1 |
| <i>circRSRC1</i> | miR-6071            | 2 |
| <i>circRSRC1</i> | miR-610             | 1 |
| <i>circRSRC1</i> | miR-611/3131        | 2 |
| <i>circRSRC1</i> | miR-617             | 2 |
| <i>circRSRC1</i> | miR-618             | 1 |
| <i>circRSRC1</i> | miR-627-3p          | 5 |
| <i>circRSRC1</i> | miR-642a-5p         | 1 |
| <i>circRSRC1</i> | miR-6505-3p         | 2 |
| <i>circRSRC1</i> | miR-6507-5p         | 2 |
| <i>circRSRC1</i> | miR-6514-3p         | 1 |
| <i>circRSRC1</i> | miR-660-3p          | 2 |
| <i>circRSRC1</i> | miR-670-3p          | 3 |
| <i>circRSRC1</i> | miR-6734-3p         | 4 |
| <i>circRSRC1</i> | miR-6738-3p         | 2 |
| <i>circRSRC1</i> | miR-6739-3p         | 1 |
| <i>circRSRC1</i> | miR-6740-3p         | 2 |
| <i>circRSRC1</i> | miR-6749-3p         | 2 |
| <i>circRSRC1</i> | miR-675-3p          | 2 |
| <i>circRSRC1</i> | miR-676-5p          | 1 |
| <i>circRSRC1</i> | miR-6764-3p/6824-3p | 2 |
| <i>circRSRC1</i> | miR-6780b-3p        | 1 |
| <i>circRSRC1</i> | miR-6790-3p         | 1 |
| <i>circRSRC1</i> | miR-6800-3p         | 1 |
| <i>circRSRC1</i> | miR-6803-3p         | 1 |



|                  |                          |   |
|------------------|--------------------------|---|
| <i>circRSRC1</i> | miR-6809-3p              | 9 |
| <i>circRSRC1</i> | miR-6821-3p              | 1 |
| <i>circRSRC1</i> | miR-6828-3p              | 2 |
| <i>circRSRC1</i> | miR-6846-3p              | 1 |
| <i>circRSRC1</i> | miR-6859-3p              | 1 |
| <i>circRSRC1</i> | miR-6868-3p              | 7 |
| <i>circRSRC1</i> | miR-6874-5p              | 1 |
| <i>circRSRC1</i> | miR-6875-3p              | 3 |
| <i>circRSRC1</i> | miR-6894-3p              | 1 |
| <i>circRSRC1</i> | miR-6894-5p              | 3 |
| <i>circRSRC1</i> | miR-7154-3p              | 3 |
| <i>circRSRC1</i> | miR-7158-3p              | 1 |
| <i>circRSRC1</i> | miR-7159-3p              | 2 |
| <i>circRSRC1</i> | miR-7161-3p              | 4 |
| <i>circRSRC1</i> | miR-7641                 | 3 |
| <i>circRSRC1</i> | miR-765                  | 3 |
| <i>circRSRC1</i> | miR-766-5p               | 3 |
| <i>circRSRC1</i> | miR-767-3p               | 2 |
| <i>circRSRC1</i> | miR-7974                 | 2 |
| <i>circRSRC1</i> | miR-8066                 | 2 |
| <i>circRSRC1</i> | miR-876-5p               | 1 |
| <i>circRSRC1</i> | miR-887-3p               | 3 |
| <i>circRSRC1</i> | miR-934                  | 2 |
| <i>circRSRC1</i> | miR-942-5p               | 9 |
| <i>circRSRC1</i> | let-7-5p/98-5p           | 1 |
| <i>circRSRC1</i> | miR-1180-5p              | 1 |
| <i>circRSRC1</i> | miR-1185-5p              | 1 |
| <i>circRSRC1</i> | miR-1207-5p/4763-3p      | 1 |
| <i>circRSRC1</i> | miR-1228-3p              | 1 |
| <i>circRSRC1</i> | miR-1229-3p              | 1 |
| <i>circRSRC1</i> | miR-1236-3p              | 1 |
| <i>circRSRC1</i> | miR-124-3p.1             | 1 |
| <i>circRSRC1</i> | miR-1243                 | 1 |
| <i>circRSRC1</i> | miR-1254/3116            | 1 |
| <i>circRSRC1</i> | miR-1262/4701-3p/6736-5p | 1 |
| <i>circRSRC1</i> | miR-1266-3p              | 1 |
| <i>circRSRC1</i> | miR-1266-5p/4518         | 1 |
| <i>circRSRC1</i> | miR-1282                 | 2 |

|                  |                      |   |
|------------------|----------------------|---|
| <i>circRSRC1</i> | miR-1294             | 1 |
| <i>circRSRC1</i> | miR-1295b-5p/1912    | 1 |
| <i>circRSRC1</i> | miR-1304-3p          | 1 |
| <i>circRSRC1</i> | miR-1304-5p          | 1 |
| <i>circRSRC1</i> | miR-130b-5p          | 4 |
| <i>circRSRC1</i> | miR-133a-3p.2/133b   | 1 |
| <i>circRSRC1</i> | miR-134-5p           | 1 |
| <i>circRSRC1</i> | miR-137              | 1 |
| <i>circRSRC1</i> | miR-141-5p           | 2 |
| <i>circRSRC1</i> | miR-145-3p           | 1 |
| <i>circRSRC1</i> | miR-146-5p           | 1 |
| <i>circRSRC1</i> | miR-146a-3p          | 1 |
| <i>circRSRC1</i> | miR-147a             | 1 |
| <i>circRSRC1</i> | miR-181-3p/4420      | 1 |
| <i>circRSRC1</i> | miR-188-5p           | 1 |
| <i>circRSRC1</i> | miR-18a-3p           | 2 |
| <i>circRSRC1</i> | miR-19-5p            | 1 |
| <i>circRSRC1</i> | miR-1909-3p/6722-3p  | 1 |
| <i>circRSRC1</i> | miR-191-5p           | 1 |
| <i>circRSRC1</i> | miR-1910-3p/6511a-5p | 1 |
| <i>circRSRC1</i> | miR-1915-3p/6764-5p  | 1 |
| <i>circRSRC1</i> | miR-196-5p           | 1 |
| <i>circRSRC1</i> | miR-196a-3p          | 1 |
| <i>circRSRC1</i> | miR-1976             | 1 |
| <i>circRSRC1</i> | miR-200ab-5p         | 1 |
| <i>circRSRC1</i> | miR-202-5p           | 1 |
| <i>circRSRC1</i> | miR-204-5p/211-5p    | 2 |
| <i>circRSRC1</i> | miR-2052             | 1 |
| <i>circRSRC1</i> | miR-2054             | 3 |
| <i>circRSRC1</i> | miR-20a-3p           | 1 |
| <i>circRSRC1</i> | miR-20b-3p           | 1 |
| <i>circRSRC1</i> | miR-2114-5p          | 1 |
| <i>circRSRC1</i> | miR-2116-5p          | 1 |
| <i>circRSRC1</i> | miR-2117             | 2 |
| <i>circRSRC1</i> | miR-214-5p           | 1 |
| <i>circRSRC1</i> | miR-216b-3p          | 1 |
| <i>circRSRC1</i> | miR-22-5p            | 1 |
| <i>circRSRC1</i> | miR-2355-3p          | 2 |

|                  |                           |   |
|------------------|---------------------------|---|
| <i>circRSRC1</i> | miR-24-3p                 | 1 |
| <i>circRSRC1</i> | miR-29c-5p                | 2 |
| <i>circRSRC1</i> | miR-30-3p                 | 1 |
| <i>circRSRC1</i> | miR-3074-5p               | 1 |
| <i>circRSRC1</i> | miR-3130-3p               | 1 |
| <i>circRSRC1</i> | miR-3130-5p/4482-5p       | 1 |
| <i>circRSRC1</i> | miR-3136-5p/4439          | 1 |
| <i>circRSRC1</i> | miR-3137                  | 1 |
| <i>circRSRC1</i> | miR-3147                  | 1 |
| <i>circRSRC1</i> | miR-3157-3p               | 2 |
| <i>circRSRC1</i> | miR-3164                  | 1 |
| <i>circRSRC1</i> | miR-3171                  | 1 |
| <i>circRSRC1</i> | miR-3174                  | 1 |
| <i>circRSRC1</i> | miR-3177-5p               | 1 |
| <i>circRSRC1</i> | miR-3183/4723-3p/6769b-3p | 1 |
| <i>circRSRC1</i> | miR-3193                  | 1 |
| <i>circRSRC1</i> | miR-32-3p                 | 1 |
| <i>circRSRC1</i> | miR-324-3p/1913           | 2 |
| <i>circRSRC1</i> | miR-329-5p                | 1 |
| <i>circRSRC1</i> | miR-33a-3p                | 1 |
| <i>circRSRC1</i> | miR-342-3p                | 1 |
| <i>circRSRC1</i> | miR-34b-5p/449c-5p        | 1 |
| <i>circRSRC1</i> | miR-3591-5p               | 1 |
| <i>circRSRC1</i> | miR-3605-5p               | 1 |
| <i>circRSRC1</i> | miR-3606-5p               | 1 |
| <i>circRSRC1</i> | miR-3613-3p               | 2 |
| <i>circRSRC1</i> | miR-362-5p/500b-5p        | 2 |
| <i>circRSRC1</i> | miR-3650                  | 2 |
| <i>circRSRC1</i> | miR-3653-5p               | 1 |
| <i>circRSRC1</i> | miR-3654                  | 1 |
| <i>circRSRC1</i> | miR-3655                  | 2 |
| <i>circRSRC1</i> | miR-3664-3p               | 1 |
| <i>circRSRC1</i> | miR-3670                  | 1 |
| <i>circRSRC1</i> | miR-3672/6864-3p          | 1 |
| <i>circRSRC1</i> | miR-3685                  | 1 |
| <i>circRSRC1</i> | miR-3689d/6851-5p         | 1 |
| <i>circRSRC1</i> | miR-3690                  | 1 |
| <i>circRSRC1</i> | miR-3714                  | 1 |

|                  |                     |   |
|------------------|---------------------|---|
| <i>circRSRC1</i> | miR-376-3p          | 1 |
| <i>circRSRC1</i> | miR-377-5p/6086     | 1 |
| <i>circRSRC1</i> | miR-378g            | 1 |
| <i>circRSRC1</i> | miR-380-5p/563      | 1 |
| <i>circRSRC1</i> | miR-381-3p          | 1 |
| <i>circRSRC1</i> | miR-384             | 1 |
| <i>circRSRC1</i> | miR-3910            | 1 |
| <i>circRSRC1</i> | miR-3911            | 1 |
| <i>circRSRC1</i> | miR-3912-5p         | 1 |
| <i>circRSRC1</i> | miR-3922-5p         | 1 |
| <i>circRSRC1</i> | miR-3924            | 2 |
| <i>circRSRC1</i> | miR-3926            | 1 |
| <i>circRSRC1</i> | miR-3927-3p/6831-5p | 1 |
| <i>circRSRC1</i> | miR-3934-3p         | 1 |
| <i>circRSRC1</i> | miR-3942-3p         | 1 |
| <i>circRSRC1</i> | miR-409-3p          | 1 |
| <i>circRSRC1</i> | miR-4254            | 1 |
| <i>circRSRC1</i> | miR-4259            | 1 |
| <i>circRSRC1</i> | miR-4266            | 1 |
| <i>circRSRC1</i> | miR-4267            | 1 |
| <i>circRSRC1</i> | miR-4268            | 1 |
| <i>circRSRC1</i> | miR-4279            | 2 |
| <i>circRSRC1</i> | miR-4282            | 1 |
| <i>circRSRC1</i> | miR-4284            | 1 |
| <i>circRSRC1</i> | miR-4293            | 1 |
| <i>circRSRC1</i> | miR-431-5p          | 1 |
| <i>circRSRC1</i> | miR-4316            | 1 |
| <i>circRSRC1</i> | miR-4325            | 1 |
| <i>circRSRC1</i> | miR-4328            | 1 |
| <i>circRSRC1</i> | miR-4423-5p         | 1 |
| <i>circRSRC1</i> | miR-4425            | 1 |
| <i>circRSRC1</i> | miR-4433a-3p        | 1 |
| <i>circRSRC1</i> | miR-4433a-5p        | 1 |
| <i>circRSRC1</i> | miR-4448            | 1 |
| <i>circRSRC1</i> | miR-4450            | 1 |
| <i>circRSRC1</i> | miR-4455            | 1 |
| <i>circRSRC1</i> | miR-4459            | 1 |
| <i>circRSRC1</i> | miR-4474-3p         | 1 |

|                  |                                  |   |
|------------------|----------------------------------|---|
| <i>circRSRC1</i> | miR-4480                         | 1 |
| <i>circRSRC1</i> | miR-4485-3p                      | 1 |
| <i>circRSRC1</i> | miR-4486                         | 1 |
| <i>circRSRC1</i> | miR-4494                         | 1 |
| <i>circRSRC1</i> | miR-4495                         | 3 |
| <i>circRSRC1</i> | miR-4540                         | 1 |
| <i>circRSRC1</i> | miR-4646-3p                      | 2 |
| <i>circRSRC1</i> | miR-4652-3p                      | 1 |
| <i>circRSRC1</i> | miR-466                          | 1 |
| <i>circRSRC1</i> | miR-4666a-3p                     | 1 |
| <i>circRSRC1</i> | miR-4666b                        | 1 |
| <i>circRSRC1</i> | miR-4668-3p                      | 1 |
| <i>circRSRC1</i> | miR-4677-3p                      | 1 |
| <i>circRSRC1</i> | miR-4679                         | 1 |
| <i>circRSRC1</i> | miR-4684-5p                      | 3 |
| <i>circRSRC1</i> | miR-4703-3p                      | 1 |
| <i>circRSRC1</i> | miR-4712-3p                      | 1 |
| <i>circRSRC1</i> | miR-4713-3p                      | 1 |
| <i>circRSRC1</i> | miR-4715-5p                      | 1 |
| <i>circRSRC1</i> | miR-4716-3p/6794-5p              | 1 |
| <i>circRSRC1</i> | miR-4717-5p                      | 1 |
| <i>circRSRC1</i> | miR-4723-5p/5698/6870-5p/7111-5p | 1 |
| <i>circRSRC1</i> | miR-4724-3p                      | 1 |
| <i>circRSRC1</i> | miR-4726-3p                      | 1 |
| <i>circRSRC1</i> | miR-4727-5p                      | 2 |
| <i>circRSRC1</i> | miR-4730                         | 1 |
| <i>circRSRC1</i> | miR-4736                         | 1 |
| <i>circRSRC1</i> | miR-4740-3p                      | 2 |
| <i>circRSRC1</i> | miR-4743-3p                      | 1 |
| <i>circRSRC1</i> | miR-4746-3p                      | 1 |
| <i>circRSRC1</i> | miR-4760-5p/8061                 | 1 |
| <i>circRSRC1</i> | miR-4768-3p                      | 1 |
| <i>circRSRC1</i> | miR-4773                         | 1 |
| <i>circRSRC1</i> | miR-4781-3p                      | 1 |
| <i>circRSRC1</i> | miR-4786-5p                      | 3 |
| <i>circRSRC1</i> | miR-4790-5p                      | 1 |
| <i>circRSRC1</i> | miR-4793-3p                      | 1 |
| <i>circRSRC1</i> | miR-4795-3p                      | 1 |

|                  |                                               |   |
|------------------|-----------------------------------------------|---|
| <i>circRSRC1</i> | miR-4802-3p                                   | 1 |
| <i>circRSRC1</i> | miR-486-5p                                    | 2 |
| <i>circRSRC1</i> | miR-492                                       | 2 |
| <i>circRSRC1</i> | miR-499b-5p                                   | 1 |
| <i>circRSRC1</i> | miR-5001-3p                                   | 2 |
| <i>circRSRC1</i> | miR-5002-5p                                   | 1 |
| <i>circRSRC1</i> | miR-5003-3p                                   | 1 |
| <i>circRSRC1</i> | miR-5008-5p                                   | 1 |
| <i>circRSRC1</i> | miR-5009-3p                                   | 1 |
| <i>circRSRC1</i> | miR-500b-3p                                   | 1 |
| <i>circRSRC1</i> | miR-501-5p                                    | 2 |
| <i>circRSRC1</i> | miR-5010-5p                                   | 1 |
| <i>circRSRC1</i> | miR-5011-3p                                   | 1 |
| <i>circRSRC1</i> | miR-502-5p                                    | 2 |
| <i>circRSRC1</i> | miR-5089-3p                                   | 1 |
| <i>circRSRC1</i> | miR-5091                                      | 1 |
| <i>circRSRC1</i> | miR-5092                                      | 1 |
| <i>circRSRC1</i> | miR-5096                                      | 1 |
| <i>circRSRC1</i> | miR-510-3p                                    | 1 |
| <i>circRSRC1</i> | miR-511-3p                                    | 1 |
| <i>circRSRC1</i> | miR-513a-3p/513c-3p/3606-3p                   | 1 |
| <i>circRSRC1</i> | miR-513b-5p                                   | 1 |
| <i>circRSRC1</i> | miR-515-5p/519e-5p                            | 1 |
| <i>circRSRC1</i> | miR-524-5p                                    | 1 |
| <i>circRSRC1</i> | miR-548az-3p/548ar-3p/548a-3p/548e-3p/548f-3p | 1 |
| <i>circRSRC1</i> | miR-548c-3p                                   | 3 |
| <i>circRSRC1</i> | miR-548g-3p                                   | 2 |
| <i>circRSRC1</i> | miR-548p                                      | 1 |
| <i>circRSRC1</i> | miR-551b-5p                                   | 1 |
| <i>circRSRC1</i> | miR-553                                       | 1 |
| <i>circRSRC1</i> | miR-5571-5p                                   | 1 |
| <i>circRSRC1</i> | miR-5582-3p                                   | 1 |
| <i>circRSRC1</i> | miR-5588-3p                                   | 1 |
| <i>circRSRC1</i> | miR-5591-3p                                   | 1 |
| <i>circRSRC1</i> | miR-5690                                      | 1 |
| <i>circRSRC1</i> | miR-5707                                      | 2 |
| <i>circRSRC1</i> | miR-5739                                      | 1 |
| <i>circRSRC1</i> | miR-576-3p                                    | 1 |

|                  |                                      |   |
|------------------|--------------------------------------|---|
| <i>circRSRC1</i> | miR-580-3p                           | 1 |
| <i>circRSRC1</i> | miR-582-3p                           | 1 |
| <i>circRSRC1</i> | miR-589-5p                           | 1 |
| <i>circRSRC1</i> | miR-590-3p                           | 1 |
| <i>circRSRC1</i> | miR-596                              | 1 |
| <i>circRSRC1</i> | miR-605-5p                           | 1 |
| <i>circRSRC1</i> | miR-6076/6797-3p                     | 1 |
| <i>circRSRC1</i> | miR-6078                             | 1 |
| <i>circRSRC1</i> | miR-6084                             | 1 |
| <i>circRSRC1</i> | miR-6089                             | 1 |
| <i>circRSRC1</i> | miR-609                              | 1 |
| <i>circRSRC1</i> | miR-612/1285-3p/3187-5p/5189-5p/6860 | 1 |
| <i>circRSRC1</i> | miR-6132/6836-5p                     | 1 |
| <i>circRSRC1</i> | miR-619-3p                           | 1 |
| <i>circRSRC1</i> | miR-623                              | 2 |
| <i>circRSRC1</i> | miR-625-5p                           | 1 |
| <i>circRSRC1</i> | miR-629-3p                           | 2 |
| <i>circRSRC1</i> | miR-631/3661                         | 1 |
| <i>circRSRC1</i> | miR-634                              | 1 |
| <i>circRSRC1</i> | miR-638                              | 1 |
| <i>circRSRC1</i> | miR-644a                             | 1 |
| <i>circRSRC1</i> | miR-6501-5p                          | 1 |
| <i>circRSRC1</i> | miR-6502-3p                          | 1 |
| <i>circRSRC1</i> | miR-6510-3p                          | 2 |
| <i>circRSRC1</i> | miR-6515-3p                          | 1 |
| <i>circRSRC1</i> | miR-653-3p                           | 1 |
| <i>circRSRC1</i> | miR-653-5p                           | 1 |
| <i>circRSRC1</i> | miR-655-5p                           | 1 |
| <i>circRSRC1</i> | miR-659-5p                           | 2 |
| <i>circRSRC1</i> | miR-660-5p                           | 2 |
| <i>circRSRC1</i> | miR-661                              | 1 |
| <i>circRSRC1</i> | miR-670-5p                           | 1 |
| <i>circRSRC1</i> | miR-6723-5p                          | 1 |
| <i>circRSRC1</i> | miR-6728-3p                          | 2 |
| <i>circRSRC1</i> | miR-6732-5p                          | 1 |
| <i>circRSRC1</i> | miR-6741-3p                          | 1 |
| <i>circRSRC1</i> | miR-6741-5p                          | 1 |
| <i>circRSRC1</i> | miR-6742-3p                          | 1 |

|                  |                     |   |
|------------------|---------------------|---|
| <i>circRSRC1</i> | miR-6752-3p         | 1 |
| <i>circRSRC1</i> | miR-6759-3p         | 2 |
| <i>circRSRC1</i> | miR-676-3p          | 2 |
| <i>circRSRC1</i> | miR-6765-5p         | 1 |
| <i>circRSRC1</i> | miR-6770-3p         | 1 |
| <i>circRSRC1</i> | miR-6771-3p         | 1 |
| <i>circRSRC1</i> | miR-6772-3p         | 1 |
| <i>circRSRC1</i> | miR-6772-5p         | 1 |
| <i>circRSRC1</i> | miR-6780a-3p        | 1 |
| <i>circRSRC1</i> | miR-6782-3p         | 1 |
| <i>circRSRC1</i> | miR-6798-5p         | 1 |
| <i>circRSRC1</i> | miR-6805-5p         | 1 |
| <i>circRSRC1</i> | miR-6808-3p         | 2 |
| <i>circRSRC1</i> | miR-6811-3p         | 1 |
| <i>circRSRC1</i> | miR-6818-5p         | 1 |
| <i>circRSRC1</i> | miR-6832-3p         | 2 |
| <i>circRSRC1</i> | miR-6840-3p         | 1 |
| <i>circRSRC1</i> | miR-6843-3p/6848-3p | 1 |
| <i>circRSRC1</i> | miR-6849-3p         | 1 |
| <i>circRSRC1</i> | miR-6852-5p         | 1 |
| <i>circRSRC1</i> | miR-6854-5p         | 1 |
| <i>circRSRC1</i> | miR-6861-3p         | 2 |
| <i>circRSRC1</i> | miR-6867-5p         | 1 |
| <i>circRSRC1</i> | miR-6881-3p         | 1 |
| <i>circRSRC1</i> | miR-6885-3p         | 1 |
| <i>circRSRC1</i> | miR-6886-3p         | 2 |
| <i>circRSRC1</i> | miR-6888-3p         | 1 |
| <i>circRSRC1</i> | miR-6890-3p         | 1 |
| <i>circRSRC1</i> | miR-7108-5p         | 1 |
| <i>circRSRC1</i> | miR-7111-3p         | 1 |
| <i>circRSRC1</i> | miR-7152-5p         | 1 |
| <i>circRSRC1</i> | miR-744-3p          | 1 |
| <i>circRSRC1</i> | miR-758-5p          | 1 |
| <i>circRSRC1</i> | miR-769-5p          | 3 |
| <i>circRSRC1</i> | miR-7703            | 1 |
| <i>circRSRC1</i> | miR-7849-3p         | 2 |
| <i>circRSRC1</i> | miR-7851-3p         | 1 |
| <i>circRSRC1</i> | miR-7855-5p         | 2 |



|                  |                                       |   |
|------------------|---------------------------------------|---|
| <i>circRSRC1</i> | miR-7973                              | 1 |
| <i>circRSRC1</i> | miR-7977                              | 1 |
| <i>circRSRC1</i> | miR-8055                              | 1 |
| <i>circRSRC1</i> | miR-8065                              | 1 |
| <i>circRSRC1</i> | miR-873-5p.1                          | 1 |
| <i>circRSRC1</i> | miR-874-3p                            | 2 |
| <i>circRSRC1</i> | miR-888-5p                            | 1 |
| <i>circRSRC1</i> | miR-921                               | 1 |
| <i>circRSRC1</i> | miR-935                               | 1 |
| <i>circRSRC1</i> | miR-938                               | 2 |
| <i>circRSRC1</i> | miR-939-3p                            | 1 |
| <i>circRSRC1</i> | miR-940/6808-5p/6893-5p               | 1 |
| <i>circRSRC1</i> | miR-943                               | 1 |
| <i>circRTN4</i>  | let-7a-3p/let-7b-3p/let-7f-1-3p/98-3p | 2 |
| <i>circRTN4</i>  | let-7f-2-3p/1185-3p                   | 2 |
| <i>circRTN4</i>  | miR-100-3p                            | 2 |
| <i>circRTN4</i>  | miR-101-3p.1                          | 3 |
| <i>circRTN4</i>  | miR-101-3p.2                          | 1 |
| <i>circRTN4</i>  | miR-1179                              | 2 |
| <i>circRTN4</i>  | miR-1202/3972                         | 1 |
| <i>circRTN4</i>  | miR-122-5p                            | 1 |
| <i>circRTN4</i>  | miR-1224-5p                           | 1 |
| <i>circRTN4</i>  | miR-1227-3p                           | 1 |
| <i>circRTN4</i>  | miR-1236-3p                           | 4 |
| <i>circRTN4</i>  | miR-1243                              | 2 |
| <i>circRTN4</i>  | miR-1245b-3p                          | 3 |
| <i>circRTN4</i>  | miR-1266-5p/4518                      | 1 |
| <i>circRTN4</i>  | miR-1270                              | 1 |
| <i>circRTN4</i>  | miR-1281                              | 1 |
| <i>circRTN4</i>  | miR-1284                              | 1 |
| <i>circRTN4</i>  | miR-1291/6775-3p                      | 2 |
| <i>circRTN4</i>  | miR-1298-3p                           | 1 |
| <i>circRTN4</i>  | miR-1299                              | 1 |
| <i>circRTN4</i>  | miR-133a-3p.2/133b                    | 1 |
| <i>circRTN4</i>  | miR-144-3p                            | 3 |
| <i>circRTN4</i>  | miR-145-3p                            | 1 |
| <i>circRTN4</i>  | miR-146a-3p                           | 2 |
| <i>circRTN4</i>  | miR-146b-3p                           | 2 |

|                 |                     |   |
|-----------------|---------------------|---|
| <i>circRTN4</i> | miR-16-1-3p         | 2 |
| <i>circRTN4</i> | miR-182-3p          | 1 |
| <i>circRTN4</i> | miR-183-3p          | 2 |
| <i>circRTN4</i> | miR-185-5p          | 1 |
| <i>circRTN4</i> | miR-192-5p/215-5p   | 2 |
| <i>circRTN4</i> | miR-194-5p          | 3 |
| <i>circRTN4</i> | miR-1976            | 1 |
| <i>circRTN4</i> | miR-203b-3p         | 1 |
| <i>circRTN4</i> | miR-203b-5p/6718-5p | 1 |
| <i>circRTN4</i> | miR-208-5p          | 2 |
| <i>circRTN4</i> | miR-2115-3p         | 2 |
| <i>circRTN4</i> | miR-212-5p          | 2 |
| <i>circRTN4</i> | miR-217             | 1 |
| <i>circRTN4</i> | miR-218-1-3p        | 1 |
| <i>circRTN4</i> | miR-218-2-3p        | 1 |
| <i>circRTN4</i> | miR-219a-1-3p       | 1 |
| <i>circRTN4</i> | miR-219a-2-3p       | 2 |
| <i>circRTN4</i> | miR-219b-3p         | 2 |
| <i>circRTN4</i> | miR-26-3p           | 1 |
| <i>circRTN4</i> | miR-2682-3p/6781-3p | 1 |
| <i>circRTN4</i> | miR-29a-5p          | 1 |
| <i>circRTN4</i> | miR-301a-5p/301b-5p | 1 |
| <i>circRTN4</i> | miR-3074-5p         | 1 |
| <i>circRTN4</i> | miR-3126-3p         | 1 |
| <i>circRTN4</i> | miR-3127-5p         | 1 |
| <i>circRTN4</i> | miR-3130-3p         | 1 |
| <i>circRTN4</i> | miR-3150b-3p        | 1 |
| <i>circRTN4</i> | miR-3152-5p         | 3 |
| <i>circRTN4</i> | miR-3160-5p         | 2 |
| <i>circRTN4</i> | miR-3173-5p         | 2 |
| <i>circRTN4</i> | miR-3189-3p         | 2 |
| <i>circRTN4</i> | miR-3191-5p         | 3 |
| <i>circRTN4</i> | miR-3193            | 4 |
| <i>circRTN4</i> | miR-3194-5p         | 1 |
| <i>circRTN4</i> | miR-3198/4309       | 1 |
| <i>circRTN4</i> | miR-3200-5p         | 2 |
| <i>circRTN4</i> | miR-3201/4791       | 2 |
| <i>circRTN4</i> | miR-323-3p          | 1 |

|                 |                                              |   |
|-----------------|----------------------------------------------|---|
| <i>circRTN4</i> | miR-328-3p                                   | 2 |
| <i>circRTN4</i> | miR-34a-3p                                   | 2 |
| <i>circRTN4</i> | miR-3607-5p                                  | 3 |
| <i>circRTN4</i> | miR-3611                                     | 3 |
| <i>circRTN4</i> | miR-3617-3p                                  | 2 |
| <i>circRTN4</i> | miR-3650                                     | 2 |
| <i>circRTN4</i> | miR-3653-3p                                  | 1 |
| <i>circRTN4</i> | miR-3653-5p                                  | 1 |
| <i>circRTN4</i> | miR-3654                                     | 2 |
| <i>circRTN4</i> | miR-3658                                     | 1 |
| <i>circRTN4</i> | miR-3664-3p                                  | 1 |
| <i>circRTN4</i> | miR-3682-3p                                  | 2 |
| <i>circRTN4</i> | miR-3692-5p                                  | 5 |
| <i>circRTN4</i> | miR-370-3p                                   | 3 |
| <i>circRTN4</i> | miR-381-3p                                   | 2 |
| <i>circRTN4</i> | miR-382-5p                                   | 3 |
| <i>circRTN4</i> | miR-3914                                     | 2 |
| <i>circRTN4</i> | miR-3915                                     | 1 |
| <i>circRTN4</i> | miR-3918                                     | 1 |
| <i>circRTN4</i> | miR-3921/4653-5p                             | 1 |
| <i>circRTN4</i> | miR-3937                                     | 1 |
| <i>circRTN4</i> | miR-3942-3p                                  | 6 |
| <i>circRTN4</i> | miR-3945                                     | 1 |
| <i>circRTN4</i> | miR-4253/6862-5p                             | 1 |
| <i>circRTN4</i> | miR-4259                                     | 1 |
| <i>circRTN4</i> | miR-4289                                     | 2 |
| <i>circRTN4</i> | miR-4291                                     | 2 |
| <i>circRTN4</i> | miR-4303                                     | 3 |
| <i>circRTN4</i> | miR-4310/7157-5p                             | 2 |
| <i>circRTN4</i> | miR-4312                                     | 2 |
| <i>circRTN4</i> | miR-4317                                     | 2 |
| <i>circRTN4</i> | miR-4427                                     | 1 |
| <i>circRTN4</i> | miR-4432                                     | 1 |
| <i>circRTN4</i> | miR-4433b-3p                                 | 1 |
| <i>circRTN4</i> | miR-4436b-3p/4632-5p/6735-5p/6879-5p/7843-5p | 1 |
| <i>circRTN4</i> | miR-4452                                     | 2 |
| <i>circRTN4</i> | miR-4455                                     | 2 |
| <i>circRTN4</i> | miR-4463                                     | 1 |

|                 |                          |   |
|-----------------|--------------------------|---|
| <i>circRTN4</i> | miR-4481/4745-5p         | 1 |
| <i>circRTN4</i> | miR-4493                 | 4 |
| <i>circRTN4</i> | miR-4499                 | 1 |
| <i>circRTN4</i> | miR-4501                 | 2 |
| <i>circRTN4</i> | miR-4524a-3p             | 1 |
| <i>circRTN4</i> | miR-4531                 | 1 |
| <i>circRTN4</i> | miR-4645-3p              | 2 |
| <i>circRTN4</i> | miR-4649-3p              | 2 |
| <i>circRTN4</i> | miR-4653-3p              | 1 |
| <i>circRTN4</i> | miR-4666a-3p             | 2 |
| <i>circRTN4</i> | miR-4670-3p              | 5 |
| <i>circRTN4</i> | miR-4677-3p              | 2 |
| <i>circRTN4</i> | miR-4679                 | 2 |
| <i>circRTN4</i> | miR-4680-3p              | 1 |
| <i>circRTN4</i> | miR-4680-5p              | 1 |
| <i>circRTN4</i> | miR-4689/6858-5p         | 1 |
| <i>circRTN4</i> | miR-4694-5p              | 1 |
| <i>circRTN4</i> | miR-4703-3p              | 2 |
| <i>circRTN4</i> | miR-4715-5p              | 1 |
| <i>circRTN4</i> | miR-4717-5p              | 1 |
| <i>circRTN4</i> | miR-4753-5p              | 2 |
| <i>circRTN4</i> | miR-4761-3p              | 1 |
| <i>circRTN4</i> | miR-4768-5p/6833-3p      | 5 |
| <i>circRTN4</i> | miR-4774-3p              | 3 |
| <i>circRTN4</i> | miR-4778-3p              | 4 |
| <i>circRTN4</i> | miR-4778-5p              | 4 |
| <i>circRTN4</i> | miR-4782-5p/5706         | 1 |
| <i>circRTN4</i> | miR-4789-5p              | 2 |
| <i>circRTN4</i> | miR-4793-3p              | 1 |
| <i>circRTN4</i> | miR-486-5p               | 1 |
| <i>circRTN4</i> | miR-495-5p               | 3 |
| <i>circRTN4</i> | miR-5006-5p              | 1 |
| <i>circRTN4</i> | miR-500b-3p              | 1 |
| <i>circRTN4</i> | miR-506-5p               | 3 |
| <i>circRTN4</i> | miR-509-3-5p/509-5p/4418 | 1 |
| <i>circRTN4</i> | miR-5100                 | 2 |
| <i>circRTN4</i> | miR-512-5p               | 2 |
| <i>circRTN4</i> | miR-514a-3p              | 2 |

|                 |                    |   |
|-----------------|--------------------|---|
| <i>circRTN4</i> | miR-516b-5p        | 1 |
| <i>circRTN4</i> | miR-5187-3p        | 1 |
| <i>circRTN4</i> | miR-5192           | 1 |
| <i>circRTN4</i> | miR-5193           | 1 |
| <i>circRTN4</i> | miR-5197-3p        | 3 |
| <i>circRTN4</i> | miR-525-5p         | 2 |
| <i>circRTN4</i> | miR-544a           | 3 |
| <i>circRTN4</i> | miR-545-5p         | 1 |
| <i>circRTN4</i> | miR-548a0-5p/548ax | 1 |
| <i>circRTN4</i> | miR-551b-5p        | 2 |
| <i>circRTN4</i> | miR-5571-5p        | 1 |
| <i>circRTN4</i> | miR-5585-5p        | 1 |
| <i>circRTN4</i> | miR-5586-5p        | 2 |
| <i>circRTN4</i> | miR-5587-5p        | 2 |
| <i>circRTN4</i> | miR-566            | 1 |
| <i>circRTN4</i> | miR-5680           | 4 |
| <i>circRTN4</i> | miR-5691           | 3 |
| <i>circRTN4</i> | miR-5708           | 2 |
| <i>circRTN4</i> | miR-571            | 1 |
| <i>circRTN4</i> | miR-573/3616-5p    | 3 |
| <i>circRTN4</i> | miR-582-5p         | 1 |
| <i>circRTN4</i> | miR-591            | 2 |
| <i>circRTN4</i> | miR-605-3p         | 4 |
| <i>circRTN4</i> | miR-6071           | 4 |
| <i>circRTN4</i> | miR-609            | 2 |
| <i>circRTN4</i> | miR-6126           | 5 |
| <i>circRTN4</i> | miR-6128           | 1 |
| <i>circRTN4</i> | miR-624-3p         | 2 |
| <i>circRTN4</i> | miR-630            | 2 |
| <i>circRTN4</i> | miR-640            | 2 |
| <i>circRTN4</i> | miR-6505-5p        | 1 |
| <i>circRTN4</i> | miR-651-3p         | 6 |
| <i>circRTN4</i> | miR-651-5p         | 2 |
| <i>circRTN4</i> | miR-6515-3p        | 4 |
| <i>circRTN4</i> | miR-6516-3p        | 1 |
| <i>circRTN4</i> | miR-659-3p         | 2 |
| <i>circRTN4</i> | miR-660-3p         | 1 |
| <i>circRTN4</i> | miR-660-5p         | 1 |

|                 |                |   |
|-----------------|----------------|---|
| <i>circRTN4</i> | miR-668-5p     | 1 |
| <i>circRTN4</i> | miR-6720-3p    | 1 |
| <i>circRTN4</i> | miR-6731-3p    | 1 |
| <i>circRTN4</i> | miR-6738-3p    | 3 |
| <i>circRTN4</i> | miR-6740-5p    | 1 |
| <i>circRTN4</i> | miR-6750-3p    | 1 |
| <i>circRTN4</i> | miR-6752-3p    | 2 |
| <i>circRTN4</i> | miR-6772-5p    | 2 |
| <i>circRTN4</i> | miR-6789-3p    | 1 |
| <i>circRTN4</i> | miR-6790-3p    | 1 |
| <i>circRTN4</i> | miR-6808-3p    | 2 |
| <i>circRTN4</i> | miR-6809-3p    | 5 |
| <i>circRTN4</i> | miR-6817-3p    | 2 |
| <i>circRTN4</i> | miR-6821-3p    | 1 |
| <i>circRTN4</i> | miR-6828-3p    | 4 |
| <i>circRTN4</i> | miR-6849-3p    | 1 |
| <i>circRTN4</i> | miR-6851-3p    | 2 |
| <i>circRTN4</i> | miR-6856-3p    | 2 |
| <i>circRTN4</i> | miR-6864-5p    | 5 |
| <i>circRTN4</i> | miR-6884-3p    | 2 |
| <i>circRTN4</i> | miR-7110-3p    | 2 |
| <i>circRTN4</i> | miR-7152-5p    | 1 |
| <i>circRTN4</i> | miR-7158-3p    | 1 |
| <i>circRTN4</i> | miR-7162-3p    | 2 |
| <i>circRTN4</i> | miR-758-3p     | 2 |
| <i>circRTN4</i> | miR-767-3p     | 3 |
| <i>circRTN4</i> | miR-7973       | 2 |
| <i>circRTN4</i> | miR-7976       | 2 |
| <i>circRTN4</i> | miR-802        | 1 |
| <i>circRTN4</i> | miR-8070       | 3 |
| <i>circRTN4</i> | miR-8087       | 1 |
| <i>circRTN4</i> | miR-892-5p     | 3 |
| <i>circRTN4</i> | miR-892b       | 3 |
| <i>circRTN4</i> | miR-93-3p      | 5 |
| <i>circRTN4</i> | miR-942-5p     | 5 |
| <i>circRTN4</i> | let-7-5p/98-5p | 1 |
| <i>circRTN4</i> | miR-10-5p      | 1 |
| <i>circRTN4</i> | miR-101-5p     | 1 |

|                 |                     |   |
|-----------------|---------------------|---|
| <i>circRTN4</i> | miR-103-3p/107      | 3 |
| <i>circRTN4</i> | miR-103a-2-5p       | 7 |
| <i>circRTN4</i> | miR-105-3p          | 1 |
| <i>circRTN4</i> | miR-105-5p          | 1 |
| <i>circRTN4</i> | miR-1184            | 3 |
| <i>circRTN4</i> | miR-1185-5p         | 3 |
| <i>circRTN4</i> | miR-1197            | 1 |
| <i>circRTN4</i> | miR-1199-5p/6751-3p | 2 |
| <i>circRTN4</i> | miR-1204            | 1 |
| <i>circRTN4</i> | miR-1205            | 3 |
| <i>circRTN4</i> | miR-1224-3p         | 1 |
| <i>circRTN4</i> | miR-1225-3p         | 2 |
| <i>circRTN4</i> | miR-1226-3p         | 1 |
| <i>circRTN4</i> | miR-1226-5p         | 2 |
| <i>circRTN4</i> | miR-1229-3p         | 1 |
| <i>circRTN4</i> | miR-1237-3p         | 2 |
| <i>circRTN4</i> | miR-1238-3p         | 1 |
| <i>circRTN4</i> | miR-1238-5p/4758-5p | 1 |
| <i>circRTN4</i> | miR-124-3p.1        | 2 |
| <i>circRTN4</i> | miR-1244            | 1 |
| <i>circRTN4</i> | miR-1245a/8079      | 2 |
| <i>circRTN4</i> | miR-1245b-5p        | 1 |
| <i>circRTN4</i> | miR-1248            | 2 |
| <i>circRTN4</i> | miR-1250-3p         | 2 |
| <i>circRTN4</i> | miR-1251-3p         | 3 |
| <i>circRTN4</i> | miR-1252-3p         | 1 |
| <i>circRTN4</i> | miR-1252-5p         | 4 |
| <i>circRTN4</i> | miR-1253            | 4 |
| <i>circRTN4</i> | miR-1255a/1255b-5p  | 1 |
| <i>circRTN4</i> | miR-1257            | 1 |
| <i>circRTN4</i> | miR-1258            | 1 |
| <i>circRTN4</i> | miR-126-5p          | 1 |
| <i>circRTN4</i> | miR-1260a/1260b     | 1 |
| <i>circRTN4</i> | miR-1261            | 1 |
| <i>circRTN4</i> | miR-1263            | 1 |
| <i>circRTN4</i> | miR-1264            | 1 |
| <i>circRTN4</i> | miR-1265            | 1 |
| <i>circRTN4</i> | miR-1266-3p         | 1 |

|                 |                   |   |
|-----------------|-------------------|---|
| <i>circRTN4</i> | miR-1269          | 3 |
| <i>circRTN4</i> | miR-127-5p        | 2 |
| <i>circRTN4</i> | miR-1272          | 2 |
| <i>circRTN4</i> | miR-1273d         | 3 |
| <i>circRTN4</i> | miR-1273e         | 3 |
| <i>circRTN4</i> | miR-1273g-3p      | 2 |
| <i>circRTN4</i> | miR-1273h-3p      | 3 |
| <i>circRTN4</i> | miR-1276          | 6 |
| <i>circRTN4</i> | miR-1277-5p       | 1 |
| <i>circRTN4</i> | miR-1278          | 1 |
| <i>circRTN4</i> | miR-1279          | 1 |
| <i>circRTN4</i> | miR-1287-5p       | 1 |
| <i>circRTN4</i> | miR-1288-5p       | 1 |
| <i>circRTN4</i> | miR-129-5p        | 1 |
| <i>circRTN4</i> | miR-1290          | 3 |
| <i>circRTN4</i> | miR-1295b-5p/1912 | 1 |
| <i>circRTN4</i> | miR-1298-5p       | 1 |
| <i>circRTN4</i> | miR-1301-3p       | 2 |
| <i>circRTN4</i> | miR-1304-3p       | 1 |
| <i>circRTN4</i> | miR-1305          | 3 |
| <i>circRTN4</i> | miR-1306-5p       | 1 |
| <i>circRTN4</i> | miR-132-3p/212-3p | 2 |
| <i>circRTN4</i> | miR-1322          | 2 |
| <i>circRTN4</i> | miR-1323          | 1 |
| <i>circRTN4</i> | miR-133a-5p       | 3 |
| <i>circRTN4</i> | miR-134-5p        | 1 |
| <i>circRTN4</i> | miR-136-3p        | 1 |
| <i>circRTN4</i> | miR-137           | 2 |
| <i>circRTN4</i> | miR-138-2-3p      | 2 |
| <i>circRTN4</i> | miR-138-5p        | 3 |
| <i>circRTN4</i> | miR-139-3p        | 1 |
| <i>circRTN4</i> | miR-139-5p        | 1 |
| <i>circRTN4</i> | miR-141-3p/200-3p | 4 |
| <i>circRTN4</i> | miR-141-5p        | 3 |
| <i>circRTN4</i> | miR-143-5p        | 3 |
| <i>circRTN4</i> | miR-1468-3p       | 5 |
| <i>circRTN4</i> | miR-148-3p/152-3p | 2 |
| <i>circRTN4</i> | miR-148a-5p       | 1 |



|                 |                                      |   |
|-----------------|--------------------------------------|---|
| <i>circRTN4</i> | miR-148b-5p/6874-3p                  | 2 |
| <i>circRTN4</i> | miR-149-3p/4728-5p/6785-5p/6883-5p   | 2 |
| <i>circRTN4</i> | miR-15-5p/16-5p/195-5p/424-5p/497-5p | 4 |
| <i>circRTN4</i> | miR-150-3p                           | 1 |
| <i>circRTN4</i> | miR-153-5p                           | 3 |
| <i>circRTN4</i> | miR-155-3p                           | 1 |
| <i>circRTN4</i> | miR-155-5p                           | 2 |
| <i>circRTN4</i> | miR-15a-3p                           | 1 |
| <i>circRTN4</i> | miR-17-3p                            | 3 |
| <i>circRTN4</i> | miR-17-5p/20-5p/93-5p/106-5p/519-3p  | 3 |
| <i>circRTN4</i> | miR-18-5p                            | 2 |
| <i>circRTN4</i> | miR-181-3p/4420                      | 1 |
| <i>circRTN4</i> | miR-1825                             | 1 |
| <i>circRTN4</i> | miR-183-5p.1                         | 1 |
| <i>circRTN4</i> | miR-185-3p                           | 1 |
| <i>circRTN4</i> | miR-186-5p                           | 6 |
| <i>circRTN4</i> | miR-188-3p                           | 1 |
| <i>circRTN4</i> | miR-19-5p                            | 2 |
| <i>circRTN4</i> | miR-190-5p                           | 1 |
| <i>circRTN4</i> | miR-190a-3p                          | 1 |
| <i>circRTN4</i> | miR-1914-5p                          | 1 |
| <i>circRTN4</i> | miR-1915-5p                          | 1 |
| <i>circRTN4</i> | miR-193a-5p                          | 1 |
| <i>circRTN4</i> | miR-194-3p                           | 1 |
| <i>circRTN4</i> | miR-197-3p                           | 3 |
| <i>circRTN4</i> | miR-199-5p                           | 1 |
| <i>circRTN4</i> | miR-200-3p/429                       | 3 |
| <i>circRTN4</i> | miR-202-5p                           | 1 |
| <i>circRTN4</i> | miR-203a-3p.1                        | 2 |
| <i>circRTN4</i> | miR-204-5p/211-5p                    | 1 |
| <i>circRTN4</i> | miR-205-5p                           | 2 |
| <i>circRTN4</i> | miR-2052                             | 2 |
| <i>circRTN4</i> | miR-208-3p                           | 1 |
| <i>circRTN4</i> | miR-20a-3p                           | 1 |
| <i>circRTN4</i> | miR-2114-3p                          | 3 |
| <i>circRTN4</i> | miR-2115-5p                          | 1 |
| <i>circRTN4</i> | miR-2116-5p                          | 1 |
| <i>circRTN4</i> | miR-214-3p/3619-5p                   | 2 |

|                 |                                     |   |
|-----------------|-------------------------------------|---|
| <i>circRTN4</i> | miR-214-5p                          | 1 |
| <i>circRTN4</i> | miR-218-5p                          | 1 |
| <i>circRTN4</i> | miR-22-5p                           | 1 |
| <i>circRTN4</i> | miR-221-3p/222-3p                   | 1 |
| <i>circRTN4</i> | miR-222-5p                          | 1 |
| <i>circRTN4</i> | miR-223-3p                          | 2 |
| <i>circRTN4</i> | miR-2278                            | 3 |
| <i>circRTN4</i> | miR-23-3p                           | 1 |
| <i>circRTN4</i> | miR-2355-5p                         | 1 |
| <i>circRTN4</i> | miR-2467-3p                         | 2 |
| <i>circRTN4</i> | miR-25-3p/32-5p/92-3p/363-3p/367-3p | 2 |
| <i>circRTN4</i> | miR-28-5p/708-5p                    | 4 |
| <i>circRTN4</i> | miR-29-3p                           | 2 |
| <i>circRTN4</i> | miR-298                             | 1 |
| <i>circRTN4</i> | miR-29b-1-5p                        | 1 |
| <i>circRTN4</i> | miR-29c-5p                          | 1 |
| <i>circRTN4</i> | miR-30-3p                           | 4 |
| <i>circRTN4</i> | miR-302b-5p/302d-5p                 | 1 |
| <i>circRTN4</i> | miR-302c-3p.2/520-3p                | 2 |
| <i>circRTN4</i> | miR-302c-5p                         | 3 |
| <i>circRTN4</i> | miR-302f                            | 2 |
| <i>circRTN4</i> | miR-3064-3p                         | 1 |
| <i>circRTN4</i> | miR-3065-3p                         | 2 |
| <i>circRTN4</i> | miR-3065-5p                         | 2 |
| <i>circRTN4</i> | miR-3074-3p                         | 1 |
| <i>circRTN4</i> | miR-3115                            | 1 |
| <i>circRTN4</i> | miR-3120-5p                         | 2 |
| <i>circRTN4</i> | miR-3121-3p                         | 2 |
| <i>circRTN4</i> | miR-3121-5p                         | 2 |
| <i>circRTN4</i> | miR-3123                            | 6 |
| <i>circRTN4</i> | miR-3124-3p                         | 1 |
| <i>circRTN4</i> | miR-3125/3916/6859-5p               | 4 |
| <i>circRTN4</i> | miR-3126-5p                         | 2 |
| <i>circRTN4</i> | miR-3129-3p/5583-5p                 | 1 |
| <i>circRTN4</i> | miR-3130-5p/4482-5p                 | 1 |
| <i>circRTN4</i> | miR-3133                            | 6 |
| <i>circRTN4</i> | miR-3134                            | 2 |
| <i>circRTN4</i> | miR-3135b                           | 1 |

|                 |                           |   |
|-----------------|---------------------------|---|
| <i>circRTN4</i> | miR-3136-3p/7155-3p       | 1 |
| <i>circRTN4</i> | miR-3136-5p/4439          | 1 |
| <i>circRTN4</i> | miR-3140-5p               | 3 |
| <i>circRTN4</i> | miR-3143                  | 1 |
| <i>circRTN4</i> | miR-3145-5p               | 1 |
| <i>circRTN4</i> | miR-3148                  | 1 |
| <i>circRTN4</i> | miR-3151-3p               | 1 |
| <i>circRTN4</i> | miR-3154                  | 4 |
| <i>circRTN4</i> | miR-3156-3p               | 1 |
| <i>circRTN4</i> | miR-3157-5p               | 2 |
| <i>circRTN4</i> | miR-3158-5p               | 3 |
| <i>circRTN4</i> | miR-3159                  | 3 |
| <i>circRTN4</i> | miR-3160-3p               | 2 |
| <i>circRTN4</i> | miR-3162-3p               | 1 |
| <i>circRTN4</i> | miR-3162-5p               | 1 |
| <i>circRTN4</i> | miR-3163                  | 2 |
| <i>circRTN4</i> | miR-3164                  | 1 |
| <i>circRTN4</i> | miR-3166                  | 1 |
| <i>circRTN4</i> | miR-3168                  | 2 |
| <i>circRTN4</i> | miR-3173-3p/6891-5p       | 3 |
| <i>circRTN4</i> | miR-3174                  | 1 |
| <i>circRTN4</i> | miR-3183/4723-3p/6769b-3p | 2 |
| <i>circRTN4</i> | miR-3184-3p               | 1 |
| <i>circRTN4</i> | miR-3185                  | 6 |
| <i>circRTN4</i> | miR-3187-3p               | 1 |
| <i>circRTN4</i> | miR-3189-5p               | 1 |
| <i>circRTN4</i> | miR-3190-3p               | 1 |
| <i>circRTN4</i> | miR-3192-3p               | 1 |
| <i>circRTN4</i> | miR-320                   | 1 |
| <i>circRTN4</i> | miR-3200-3p               | 2 |
| <i>circRTN4</i> | miR-320e                  | 1 |
| <i>circRTN4</i> | miR-330-3p                | 1 |
| <i>circRTN4</i> | miR-330-3p.2              | 3 |
| <i>circRTN4</i> | miR-335-3p                | 4 |
| <i>circRTN4</i> | miR-335-5p                | 4 |
| <i>circRTN4</i> | miR-337-3p                | 1 |
| <i>circRTN4</i> | miR-338-3p                | 1 |
| <i>circRTN4</i> | miR-339-5p                | 1 |

|                 |                           |   |
|-----------------|---------------------------|---|
| <i>circRTN4</i> | miR-33a-3p                | 1 |
| <i>circRTN4</i> | miR-33b-3p/515-3p/519e-3p | 1 |
| <i>circRTN4</i> | miR-340-5p                | 1 |
| <i>circRTN4</i> | miR-345-3p                | 3 |
| <i>circRTN4</i> | miR-346                   | 1 |
| <i>circRTN4</i> | miR-34b-3p                | 1 |
| <i>circRTN4</i> | miR-34c-3p                | 1 |
| <i>circRTN4</i> | miR-3529-3p               | 1 |
| <i>circRTN4</i> | miR-3591-5p               | 1 |
| <i>circRTN4</i> | miR-3605-5p               | 3 |
| <i>circRTN4</i> | miR-3606-5p               | 3 |
| <i>circRTN4</i> | miR-361-3p                | 1 |
| <i>circRTN4</i> | miR-361-5p                | 1 |
| <i>circRTN4</i> | miR-3613-3p               | 5 |
| <i>circRTN4</i> | miR-3614-3p               | 1 |
| <i>circRTN4</i> | miR-362-5p/500b-5p        | 1 |
| <i>circRTN4</i> | miR-3622a-3p/3622b-3p     | 2 |
| <i>circRTN4</i> | miR-3646                  | 1 |
| <i>circRTN4</i> | miR-365-3p                | 1 |
| <i>circRTN4</i> | miR-3651                  | 1 |
| <i>circRTN4</i> | miR-3652/4430             | 2 |
| <i>circRTN4</i> | miR-3659                  | 1 |
| <i>circRTN4</i> | miR-3660/4526             | 1 |
| <i>circRTN4</i> | miR-3662                  | 5 |
| <i>circRTN4</i> | miR-3663-5p               | 2 |
| <i>circRTN4</i> | miR-3667-3p               | 1 |
| <i>circRTN4</i> | miR-3667-5p               | 1 |
| <i>circRTN4</i> | miR-3670                  | 1 |
| <i>circRTN4</i> | miR-3671                  | 1 |
| <i>circRTN4</i> | miR-3672/6864-3p          | 3 |
| <i>circRTN4</i> | miR-3674                  | 1 |
| <i>circRTN4</i> | miR-3677-3p               | 1 |
| <i>circRTN4</i> | miR-3678-3p               | 3 |
| <i>circRTN4</i> | miR-3679-3p               | 1 |
| <i>circRTN4</i> | miR-3680-3p               | 2 |
| <i>circRTN4</i> | miR-3681-5p               | 2 |
| <i>circRTN4</i> | miR-3682-5p               | 2 |
| <i>circRTN4</i> | miR-3685                  | 1 |

|                 |                                   |   |
|-----------------|-----------------------------------|---|
| <i>circRTN4</i> | miR-3688-3p                       | 1 |
| <i>circRTN4</i> | miR-3688-5p                       | 1 |
| <i>circRTN4</i> | miR-3689a-5p/3689b-5p/3689e/3689f | 2 |
| <i>circRTN4</i> | miR-3689d/6851-5p                 | 1 |
| <i>circRTN4</i> | miR-3691-5p                       | 1 |
| <i>circRTN4</i> | miR-3692-3p                       | 1 |
| <i>circRTN4</i> | miR-3713                          | 1 |
| <i>circRTN4</i> | miR-3714                          | 2 |
| <i>circRTN4</i> | miR-371a-3p                       | 1 |
| <i>circRTN4</i> | miR-371b-3p                       | 1 |
| <i>circRTN4</i> | miR-375                           | 1 |
| <i>circRTN4</i> | miR-376-3p                        | 2 |
| <i>circRTN4</i> | miR-376b-5p/376c-5p               | 1 |
| <i>circRTN4</i> | miR-382-3p                        | 2 |
| <i>circRTN4</i> | miR-383-3p                        | 2 |
| <i>circRTN4</i> | miR-383-5p.1                      | 1 |
| <i>circRTN4</i> | miR-383-5p.2                      | 1 |
| <i>circRTN4</i> | miR-384                           | 1 |
| <i>circRTN4</i> | miR-3907                          | 2 |
| <i>circRTN4</i> | miR-3910                          | 2 |
| <i>circRTN4</i> | miR-3919                          | 4 |
| <i>circRTN4</i> | miR-3920                          | 3 |
| <i>circRTN4</i> | miR-3925-3p                       | 2 |
| <i>circRTN4</i> | miR-3925-5p                       | 6 |
| <i>circRTN4</i> | miR-3928-3p                       | 3 |
| <i>circRTN4</i> | miR-3928-5p/6806-3p               | 7 |
| <i>circRTN4</i> | miR-3934-3p                       | 2 |
| <i>circRTN4</i> | miR-3973                          | 2 |
| <i>circRTN4</i> | miR-3976                          | 3 |
| <i>circRTN4</i> | miR-3977                          | 3 |
| <i>circRTN4</i> | miR-3978                          | 1 |
| <i>circRTN4</i> | miR-409-3p                        | 1 |
| <i>circRTN4</i> | miR-411-5p.2                      | 1 |
| <i>circRTN4</i> | miR-412-3p/6754-3p                | 1 |
| <i>circRTN4</i> | miR-421                           | 4 |
| <i>circRTN4</i> | miR-4251                          | 4 |
| <i>circRTN4</i> | miR-4252                          | 1 |
| <i>circRTN4</i> | miR-4263                          | 6 |

|                 |                                    |   |
|-----------------|------------------------------------|---|
| <i>circRTN4</i> | miR-4264                           | 3 |
| <i>circRTN4</i> | miR-4266                           | 1 |
| <i>circRTN4</i> | miR-4267                           | 2 |
| <i>circRTN4</i> | miR-4268                           | 2 |
| <i>circRTN4</i> | miR-4270/4441/6754-5p              | 1 |
| <i>circRTN4</i> | miR-4272                           | 2 |
| <i>circRTN4</i> | miR-4276                           | 4 |
| <i>circRTN4</i> | miR-4277                           | 2 |
| <i>circRTN4</i> | miR-4279                           | 2 |
| <i>circRTN4</i> | miR-4280                           | 1 |
| <i>circRTN4</i> | miR-4282                           | 1 |
| <i>circRTN4</i> | miR-4286                           | 1 |
| <i>circRTN4</i> | miR-4287/4685-3p                   | 1 |
| <i>circRTN4</i> | miR-4293                           | 3 |
| <i>circRTN4</i> | miR-4299                           | 1 |
| <i>circRTN4</i> | miR-4301                           | 2 |
| <i>circRTN4</i> | miR-4302                           | 1 |
| <i>circRTN4</i> | miR-4307                           | 2 |
| <i>circRTN4</i> | miR-4311                           | 6 |
| <i>circRTN4</i> | miR-4318                           | 1 |
| <i>circRTN4</i> | miR-432-5p                         | 1 |
| <i>circRTN4</i> | miR-4320                           | 1 |
| <i>circRTN4</i> | miR-4324                           | 1 |
| <i>circRTN4</i> | miR-4326                           | 1 |
| <i>circRTN4</i> | miR-4328                           | 5 |
| <i>circRTN4</i> | miR-4329                           | 4 |
| <i>circRTN4</i> | miR-4330                           | 4 |
| <i>circRTN4</i> | miR-4419a/4510/6127/6129/6130/6133 | 2 |
| <i>circRTN4</i> | miR-4422                           | 3 |
| <i>circRTN4</i> | miR-4424                           | 1 |
| <i>circRTN4</i> | miR-4426/4647/4662b                | 2 |
| <i>circRTN4</i> | miR-4428                           | 3 |
| <i>circRTN4</i> | miR-4433a-3p                       | 1 |
| <i>circRTN4</i> | miR-4434/4516/5703                 | 1 |
| <i>circRTN4</i> | miR-4435                           | 1 |
| <i>circRTN4</i> | miR-4440                           | 1 |
| <i>circRTN4</i> | miR-4443                           | 2 |
| <i>circRTN4</i> | miR-4446-5p                        | 3 |

|                 |                     |   |
|-----------------|---------------------|---|
| <i>circRTN4</i> | miR-4448            | 2 |
| <i>circRTN4</i> | miR-4456            | 1 |
| <i>circRTN4</i> | miR-4459            | 1 |
| <i>circRTN4</i> | miR-4461            | 1 |
| <i>circRTN4</i> | miR-4468            | 2 |
| <i>circRTN4</i> | miR-4469            | 1 |
| <i>circRTN4</i> | miR-4470            | 4 |
| <i>circRTN4</i> | miR-4473            | 1 |
| <i>circRTN4</i> | miR-4476/6876-5p    | 5 |
| <i>circRTN4</i> | miR-4477a           | 1 |
| <i>circRTN4</i> | miR-4487            | 2 |
| <i>circRTN4</i> | miR-4490            | 1 |
| <i>circRTN4</i> | miR-4494            | 1 |
| <i>circRTN4</i> | miR-4496            | 2 |
| <i>circRTN4</i> | miR-4502            | 1 |
| <i>circRTN4</i> | miR-4503            | 1 |
| <i>circRTN4</i> | miR-4505/5787       | 2 |
| <i>circRTN4</i> | miR-4506            | 2 |
| <i>circRTN4</i> | miR-4509            | 2 |
| <i>circRTN4</i> | miR-450b-3p/769-3p  | 1 |
| <i>circRTN4</i> | miR-450b-5p         | 2 |
| <i>circRTN4</i> | miR-4511            | 3 |
| <i>circRTN4</i> | miR-4513/6855-3p    | 1 |
| <i>circRTN4</i> | miR-4517            | 4 |
| <i>circRTN4</i> | miR-452-3p          | 1 |
| <i>circRTN4</i> | miR-4521            | 1 |
| <i>circRTN4</i> | miR-4524-5p         | 1 |
| <i>circRTN4</i> | miR-4524b-3p        | 2 |
| <i>circRTN4</i> | miR-4527/6503-5p    | 1 |
| <i>circRTN4</i> | miR-4529-5p         | 1 |
| <i>circRTN4</i> | miR-4530            | 1 |
| <i>circRTN4</i> | miR-4534/8082       | 2 |
| <i>circRTN4</i> | miR-4539            | 2 |
| <i>circRTN4</i> | miR-455-3p.2        | 3 |
| <i>circRTN4</i> | miR-455-5p          | 1 |
| <i>circRTN4</i> | miR-4633-3p/6500-5p | 2 |
| <i>circRTN4</i> | miR-4635            | 4 |
| <i>circRTN4</i> | miR-4639-3p         | 1 |

|                 |                       |   |
|-----------------|-----------------------|---|
| <i>circRTN4</i> | miR-4639-5p           | 1 |
| <i>circRTN4</i> | miR-4640-3p           | 1 |
| <i>circRTN4</i> | miR-4641              | 1 |
| <i>circRTN4</i> | miR-4658/6790-5p      | 1 |
| <i>circRTN4</i> | miR-4659a-3p/4659b-3p | 1 |
| <i>circRTN4</i> | miR-4660              | 1 |
| <i>circRTN4</i> | miR-4661-3p           | 1 |
| <i>circRTN4</i> | miR-4661-5p           | 1 |
| <i>circRTN4</i> | miR-4662-5p           | 1 |
| <i>circRTN4</i> | miR-4662a-3p          | 4 |
| <i>circRTN4</i> | miR-4663              | 2 |
| <i>circRTN4</i> | miR-4666b             | 1 |
| <i>circRTN4</i> | miR-4668-3p           | 2 |
| <i>circRTN4</i> | miR-4671-3p           | 1 |
| <i>circRTN4</i> | miR-4678              | 1 |
| <i>circRTN4</i> | miR-4682              | 1 |
| <i>circRTN4</i> | miR-4683              | 1 |
| <i>circRTN4</i> | miR-4684-3p           | 1 |
| <i>circRTN4</i> | miR-4685-5p/6837-5p   | 1 |
| <i>circRTN4</i> | miR-4686              | 2 |
| <i>circRTN4</i> | miR-4690-3p/5685      | 1 |
| <i>circRTN4</i> | miR-4691-3p           | 3 |
| <i>circRTN4</i> | miR-4693-3p           | 2 |
| <i>circRTN4</i> | miR-4694-3p           | 4 |
| <i>circRTN4</i> | miR-4696              | 1 |
| <i>circRTN4</i> | miR-4697-3p           | 2 |
| <i>circRTN4</i> | miR-4699-5p           | 2 |
| <i>circRTN4</i> | miR-4700-3p           | 2 |
| <i>circRTN4</i> | miR-4704-5p           | 2 |
| <i>circRTN4</i> | miR-4707-5p           | 1 |
| <i>circRTN4</i> | miR-4709-3p           | 6 |
| <i>circRTN4</i> | miR-4709-5p           | 3 |
| <i>circRTN4</i> | miR-4711-3p           | 2 |
| <i>circRTN4</i> | miR-4712-3p           | 1 |
| <i>circRTN4</i> | miR-4713-3p           | 1 |
| <i>circRTN4</i> | miR-4715-3p           | 1 |
| <i>circRTN4</i> | miR-4717-3p           | 1 |
| <i>circRTN4</i> | miR-4719              | 3 |



|                 |                     |   |
|-----------------|---------------------|---|
| <i>circRTN4</i> | miR-4724-3p         | 2 |
| <i>circRTN4</i> | miR-4724-5p         | 3 |
| <i>circRTN4</i> | miR-4725-5p         | 1 |
| <i>circRTN4</i> | miR-4727-5p         | 1 |
| <i>circRTN4</i> | miR-4731-3p/4801    | 1 |
| <i>circRTN4</i> | miR-4731-5p         | 1 |
| <i>circRTN4</i> | miR-4733-3p         | 1 |
| <i>circRTN4</i> | miR-4733-5p         | 1 |
| <i>circRTN4</i> | miR-4738-3p         | 4 |
| <i>circRTN4</i> | miR-4739            | 2 |
| <i>circRTN4</i> | miR-4744            | 2 |
| <i>circRTN4</i> | miR-4747-3p         | 1 |
| <i>circRTN4</i> | miR-4747-5p/5196-5p | 2 |
| <i>circRTN4</i> | miR-4750-3p         | 1 |
| <i>circRTN4</i> | miR-4751            | 1 |
| <i>circRTN4</i> | miR-4753-3p         | 2 |
| <i>circRTN4</i> | miR-4755-3p         | 3 |
| <i>circRTN4</i> | miR-4755-5p/5006-3p | 1 |
| <i>circRTN4</i> | miR-4756-3p         | 4 |
| <i>circRTN4</i> | miR-4758-3p         | 1 |
| <i>circRTN4</i> | miR-4760-5p/8061    | 1 |
| <i>circRTN4</i> | miR-4762-3p         | 3 |
| <i>circRTN4</i> | miR-4762-5p         | 1 |
| <i>circRTN4</i> | miR-4766-3p         | 1 |
| <i>circRTN4</i> | miR-4766-5p         | 3 |
| <i>circRTN4</i> | miR-4768-3p         | 1 |
| <i>circRTN4</i> | miR-4771            | 1 |
| <i>circRTN4</i> | miR-4772-5p         | 1 |
| <i>circRTN4</i> | miR-4773            | 3 |
| <i>circRTN4</i> | miR-4774-5p         | 1 |
| <i>circRTN4</i> | miR-4775            | 3 |
| <i>circRTN4</i> | miR-4776-3p         | 1 |
| <i>circRTN4</i> | miR-4781-3p         | 1 |
| <i>circRTN4</i> | miR-4786-5p         | 1 |
| <i>circRTN4</i> | miR-4793-5p         | 1 |
| <i>circRTN4</i> | miR-4795-5p         | 1 |
| <i>circRTN4</i> | miR-4797-3p         | 3 |
| <i>circRTN4</i> | miR-4797-5p         | 3 |

|                 |                     |   |
|-----------------|---------------------|---|
| <i>circRTN4</i> | miR-4799-5p         | 5 |
| <i>circRTN4</i> | miR-4802-5p         | 2 |
| <i>circRTN4</i> | miR-4803            | 1 |
| <i>circRTN4</i> | miR-483-3p.1        | 1 |
| <i>circRTN4</i> | miR-487a-5p/487b-5p | 1 |
| <i>circRTN4</i> | miR-488-3p          | 5 |
| <i>circRTN4</i> | miR-488-5p          | 2 |
| <i>circRTN4</i> | miR-489-3p          | 1 |
| <i>circRTN4</i> | miR-491-3p          | 1 |
| <i>circRTN4</i> | miR-493-3p          | 1 |
| <i>circRTN4</i> | miR-494-3p          | 3 |
| <i>circRTN4</i> | miR-495-3p          | 4 |
| <i>circRTN4</i> | miR-496.1           | 1 |
| <i>circRTN4</i> | miR-496.2           | 2 |
| <i>circRTN4</i> | miR-497-3p          | 2 |
| <i>circRTN4</i> | miR-498             | 3 |
| <i>circRTN4</i> | miR-499a-3p/499b-3p | 3 |
| <i>circRTN4</i> | miR-499a-5p         | 1 |
| <i>circRTN4</i> | miR-499b-5p         | 1 |
| <i>circRTN4</i> | miR-5001-3p         | 1 |
| <i>circRTN4</i> | miR-5002-5p         | 1 |
| <i>circRTN4</i> | miR-5003-3p         | 1 |
| <i>circRTN4</i> | miR-5003-5p         | 1 |
| <i>circRTN4</i> | miR-5004-5p         | 1 |
| <i>circRTN4</i> | miR-5007-5p         | 2 |
| <i>circRTN4</i> | miR-5008-5p         | 1 |
| <i>circRTN4</i> | miR-5009-5p/8058    | 3 |
| <i>circRTN4</i> | miR-500a-5p         | 1 |
| <i>circRTN4</i> | miR-501-5p          | 1 |
| <i>circRTN4</i> | miR-5011-3p         | 1 |
| <i>circRTN4</i> | miR-5011-5p         | 2 |
| <i>circRTN4</i> | miR-503-5p          | 4 |
| <i>circRTN4</i> | miR-504-5p.1        | 1 |
| <i>circRTN4</i> | miR-505-3p.1        | 2 |
| <i>circRTN4</i> | miR-505-3p.2        | 4 |
| <i>circRTN4</i> | miR-507/557         | 2 |
| <i>circRTN4</i> | miR-508-5p          | 1 |
| <i>circRTN4</i> | miR-5089-3p         | 1 |

|                 |                                                                  |   |
|-----------------|------------------------------------------------------------------|---|
| <i>circRTN4</i> | miR-5089-5p                                                      | 1 |
| <i>circRTN4</i> | miR-5094                                                         | 2 |
| <i>circRTN4</i> | miR-5095/7151-3p                                                 | 1 |
| <i>circRTN4</i> | miR-510-3p                                                       | 3 |
| <i>circRTN4</i> | miR-511-5p                                                       | 1 |
| <i>circRTN4</i> | miR-512-3p                                                       | 2 |
| <i>circRTN4</i> | miR-513b-3p                                                      | 2 |
| <i>circRTN4</i> | miR-513b-5p                                                      | 1 |
| <i>circRTN4</i> | miR-515-5p/519e-5p                                               | 2 |
| <i>circRTN4</i> | miR-516a-3p/516b-3p/7162-5p                                      | 1 |
| <i>circRTN4</i> | miR-5186                                                         | 2 |
| <i>circRTN4</i> | miR-5190                                                         | 2 |
| <i>circRTN4</i> | miR-5196-3p                                                      | 1 |
| <i>circRTN4</i> | miR-5197-5p                                                      | 1 |
| <i>circRTN4</i> | miR-519d-5p                                                      | 2 |
| <i>circRTN4</i> | miR-520g-3p                                                      | 2 |
| <i>circRTN4</i> | miR-522-3p                                                       | 4 |
| <i>circRTN4</i> | miR-524-5p                                                       | 1 |
| <i>circRTN4</i> | miR-532-5p                                                       | 1 |
| <i>circRTN4</i> | miR-539-5p                                                       | 4 |
| <i>circRTN4</i> | miR-543                                                          | 2 |
| <i>circRTN4</i> | miR-544b                                                         | 1 |
| <i>circRTN4</i> | miR-545-3p                                                       | 4 |
| <i>circRTN4</i> | miR-548ac/548bb-3p/548d-3p/548h-3p/548z                          | 1 |
| <i>circRTN4</i> | miR-548ah-5p/3609                                                | 3 |
| <i>circRTN4</i> | miR-548ai/548ag/548ba/570-5p                                     | 1 |
| <i>circRTN4</i> | miR-548aj-5p/548f-5p/548g-5p/548x-5p                             | 5 |
| <i>circRTN4</i> | miR-548ao-3p                                                     | 1 |
| <i>circRTN4</i> | miR-548ap-3p/548aa/548t-3p                                       | 1 |
| <i>circRTN4</i> | miR-548aq-3p/548am-3p/548aj-3p/548al-3p/548ae-3p/548j-3p/548x-3p | 1 |
| <i>circRTN4</i> | miR-548as-3p                                                     | 1 |
| <i>circRTN4</i> | miR-548at-5p                                                     | 3 |
| <i>circRTN4</i> | miR-548av-3p                                                     | 5 |
| <i>circRTN4</i> | miR-548av-5p/548k/8054                                           | 2 |
| <i>circRTN4</i> | miR-548ay-3p/548at-3p                                            | 1 |
| <i>circRTN4</i> | miR-548ay-5p/548au-5p/548as-5p/548ar-3p/548aq-5p/548ap-5p/548am- | 2 |
| <i>circRTN4</i> | miR-548az-3p/548ar-3p/548a-3p/548e-3p/548f-3p                    | 6 |
| <i>circRTN4</i> | miR-548az-5p/548t-5p                                             | 3 |

|                 |                               |   |
|-----------------|-------------------------------|---|
| <i>circRTN4</i> | miR-548b-3p                   | 3 |
| <i>circRTN4</i> | miR-548c-3p                   | 5 |
| <i>circRTN4</i> | miR-548e-5p                   | 2 |
| <i>circRTN4</i> | miR-548g-3p                   | 5 |
| <i>circRTN4</i> | miR-548l                      | 2 |
| <i>circRTN4</i> | miR-548m                      | 2 |
| <i>circRTN4</i> | miR-548n                      | 3 |
| <i>circRTN4</i> | miR-548p                      | 4 |
| <i>circRTN4</i> | miR-548q                      | 1 |
| <i>circRTN4</i> | miR-548s                      | 1 |
| <i>circRTN4</i> | miR-548u/7161-5p              | 1 |
| <i>circRTN4</i> | miR-548v                      | 1 |
| <i>circRTN4</i> | miR-550a-3-5p/550a-5p/1271-3p | 1 |
| <i>circRTN4</i> | miR-550b-3p                   | 1 |
| <i>circRTN4</i> | miR-552-5p                    | 4 |
| <i>circRTN4</i> | miR-556-3p                    | 2 |
| <i>circRTN4</i> | miR-556-5p                    | 1 |
| <i>circRTN4</i> | miR-5571-3p                   | 2 |
| <i>circRTN4</i> | miR-558                       | 2 |
| <i>circRTN4</i> | miR-5582-3p                   | 6 |
| <i>circRTN4</i> | miR-5583-3p                   | 4 |
| <i>circRTN4</i> | miR-5584-3p                   | 2 |
| <i>circRTN4</i> | miR-5584-5p                   | 2 |
| <i>circRTN4</i> | miR-5585-3p                   | 2 |
| <i>circRTN4</i> | miR-5587-3p                   | 1 |
| <i>circRTN4</i> | miR-5589-5p                   | 1 |
| <i>circRTN4</i> | miR-5591-3p                   | 2 |
| <i>circRTN4</i> | miR-561-3p                    | 3 |
| <i>circRTN4</i> | miR-5682                      | 1 |
| <i>circRTN4</i> | miR-5683                      | 4 |
| <i>circRTN4</i> | miR-5684                      | 3 |
| <i>circRTN4</i> | miR-569                       | 1 |
| <i>circRTN4</i> | miR-5692a                     | 4 |
| <i>circRTN4</i> | miR-5693                      | 1 |
| <i>circRTN4</i> | miR-5694                      | 1 |
| <i>circRTN4</i> | miR-5695                      | 2 |
| <i>circRTN4</i> | miR-5696                      | 3 |
| <i>circRTN4</i> | miR-5699-5p                   | 1 |

|                 |                 |   |
|-----------------|-----------------|---|
| <i>circRTN4</i> | miR-570-3p      | 1 |
| <i>circRTN4</i> | miR-5700        | 1 |
| <i>circRTN4</i> | miR-5702        | 3 |
| <i>circRTN4</i> | miR-574-5p      | 1 |
| <i>circRTN4</i> | miR-575/4676-5p | 4 |
| <i>circRTN4</i> | miR-576-3p      | 1 |
| <i>circRTN4</i> | miR-576-5p      | 6 |
| <i>circRTN4</i> | miR-577         | 3 |
| <i>circRTN4</i> | miR-578         | 2 |
| <i>circRTN4</i> | miR-579-3p      | 3 |
| <i>circRTN4</i> | miR-580-3p      | 1 |
| <i>circRTN4</i> | miR-580-5p      | 3 |
| <i>circRTN4</i> | miR-581         | 2 |
| <i>circRTN4</i> | miR-583         | 6 |
| <i>circRTN4</i> | miR-584-3p      | 1 |
| <i>circRTN4</i> | miR-585-5p      | 1 |
| <i>circRTN4</i> | miR-588         | 1 |
| <i>circRTN4</i> | miR-592         | 1 |
| <i>circRTN4</i> | miR-593-3p      | 1 |
| <i>circRTN4</i> | miR-596         | 3 |
| <i>circRTN4</i> | miR-599         | 1 |
| <i>circRTN4</i> | miR-604         | 1 |
| <i>circRTN4</i> | miR-605-5p      | 1 |
| <i>circRTN4</i> | miR-607         | 5 |
| <i>circRTN4</i> | miR-6077        | 3 |
| <i>circRTN4</i> | miR-6079        | 2 |
| <i>circRTN4</i> | miR-6080        | 1 |
| <i>circRTN4</i> | miR-6081        | 3 |
| <i>circRTN4</i> | miR-6083        | 1 |
| <i>circRTN4</i> | miR-6089        | 1 |
| <i>circRTN4</i> | miR-610         | 1 |
| <i>circRTN4</i> | miR-6124        | 1 |
| <i>circRTN4</i> | miR-6131        | 3 |
| <i>circRTN4</i> | miR-616-3p      | 1 |
| <i>circRTN4</i> | miR-617         | 2 |
| <i>circRTN4</i> | miR-618         | 2 |
| <i>circRTN4</i> | miR-623         | 1 |
| <i>circRTN4</i> | miR-627-3p      | 2 |

|                 |                  |   |
|-----------------|------------------|---|
| <i>circRTN4</i> | miR-627-5p       | 1 |
| <i>circRTN4</i> | miR-628-5p       | 1 |
| <i>circRTN4</i> | miR-633          | 1 |
| <i>circRTN4</i> | miR-634          | 1 |
| <i>circRTN4</i> | miR-636          | 2 |
| <i>circRTN4</i> | miR-638          | 1 |
| <i>circRTN4</i> | miR-641/3617-5p  | 1 |
| <i>circRTN4</i> | miR-642b-5p      | 1 |
| <i>circRTN4</i> | miR-643          | 1 |
| <i>circRTN4</i> | miR-646          | 4 |
| <i>circRTN4</i> | miR-647          | 1 |
| <i>circRTN4</i> | miR-6499-3p      | 1 |
| <i>circRTN4</i> | miR-6501-3p      | 1 |
| <i>circRTN4</i> | miR-6505-3p      | 2 |
| <i>circRTN4</i> | miR-6507-3p      | 1 |
| <i>circRTN4</i> | miR-6507-5p      | 1 |
| <i>circRTN4</i> | miR-6508-5p/8067 | 1 |
| <i>circRTN4</i> | miR-6511-3p      | 1 |
| <i>circRTN4</i> | miR-6512-5p      | 3 |
| <i>circRTN4</i> | miR-6514-3p      | 3 |
| <i>circRTN4</i> | miR-6514-5p      | 2 |
| <i>circRTN4</i> | miR-6515-5p      | 2 |
| <i>circRTN4</i> | miR-6516-5p      | 3 |
| <i>circRTN4</i> | miR-652-5p       | 1 |
| <i>circRTN4</i> | miR-653-3p       | 1 |
| <i>circRTN4</i> | miR-653-5p       | 5 |
| <i>circRTN4</i> | miR-656-3p       | 1 |
| <i>circRTN4</i> | miR-664a-3p      | 2 |
| <i>circRTN4</i> | miR-665          | 1 |
| <i>circRTN4</i> | miR-668-3p       | 1 |
| <i>circRTN4</i> | miR-670-3p       | 1 |
| <i>circRTN4</i> | miR-671-5p       | 4 |
| <i>circRTN4</i> | miR-6715a-3p     | 2 |
| <i>circRTN4</i> | miR-6715b-3p     | 3 |
| <i>circRTN4</i> | miR-6716-5p      | 1 |
| <i>circRTN4</i> | miR-6719-3p      | 1 |
| <i>circRTN4</i> | miR-6728-5p      | 1 |
| <i>circRTN4</i> | miR-6730-3p      | 1 |

|                 |                     |   |
|-----------------|---------------------|---|
| <i>circRTN4</i> | miR-6732-3p         | 1 |
| <i>circRTN4</i> | miR-6733-3p         | 1 |
| <i>circRTN4</i> | miR-6734-3p         | 1 |
| <i>circRTN4</i> | miR-6734-5p         | 2 |
| <i>circRTN4</i> | miR-6735-3p         | 1 |
| <i>circRTN4</i> | miR-6736-3p         | 4 |
| <i>circRTN4</i> | miR-6740-3p         | 1 |
| <i>circRTN4</i> | miR-6743-3p         | 2 |
| <i>circRTN4</i> | miR-6744-5p         | 1 |
| <i>circRTN4</i> | miR-6746-3p         | 2 |
| <i>circRTN4</i> | miR-6750-5p/6822-5p | 2 |
| <i>circRTN4</i> | miR-6753-3p/7107-3p | 1 |
| <i>circRTN4</i> | miR-6758-5p/6856-5p | 2 |
| <i>circRTN4</i> | miR-6759-3p         | 1 |
| <i>circRTN4</i> | miR-676-3p          | 2 |
| <i>circRTN4</i> | miR-676-5p          | 3 |
| <i>circRTN4</i> | miR-6760-5p         | 2 |
| <i>circRTN4</i> | miR-6761-5p         | 4 |
| <i>circRTN4</i> | miR-6762-3p         | 1 |
| <i>circRTN4</i> | miR-6765-3p         | 2 |
| <i>circRTN4</i> | miR-6770-5p         | 4 |
| <i>circRTN4</i> | miR-6771-3p         | 3 |
| <i>circRTN4</i> | miR-6772-3p         | 1 |
| <i>circRTN4</i> | miR-6776-5p         | 1 |
| <i>circRTN4</i> | miR-6777-3p         | 1 |
| <i>circRTN4</i> | miR-6778-3p         | 1 |
| <i>circRTN4</i> | miR-6780a-3p        | 2 |
| <i>circRTN4</i> | miR-6782-3p         | 1 |
| <i>circRTN4</i> | miR-6784-3p/6862-3p | 1 |
| <i>circRTN4</i> | miR-6787-3p         | 2 |
| <i>circRTN4</i> | miR-6791-3p/6829-3p | 1 |
| <i>circRTN4</i> | miR-6794-3p         | 1 |
| <i>circRTN4</i> | miR-6796-3p         | 3 |
| <i>circRTN4</i> | miR-6799-5p         | 2 |
| <i>circRTN4</i> | miR-6807-5p         | 2 |
| <i>circRTN4</i> | miR-6811-3p         | 1 |
| <i>circRTN4</i> | miR-6813-3p         | 2 |
| <i>circRTN4</i> | miR-6818-3p         | 3 |

|                 |             |   |
|-----------------|-------------|---|
| <i>circRTN4</i> | miR-6827-5p | 1 |
| <i>circRTN4</i> | miR-6828-5p | 4 |
| <i>circRTN4</i> | miR-6832-3p | 3 |
| <i>circRTN4</i> | miR-6834-5p | 2 |
| <i>circRTN4</i> | miR-6836-3p | 1 |
| <i>circRTN4</i> | miR-6837-3p | 1 |
| <i>circRTN4</i> | miR-6841-3p | 1 |
| <i>circRTN4</i> | miR-6842-3p | 1 |
| <i>circRTN4</i> | miR-6844    | 1 |
| <i>circRTN4</i> | miR-6845-3p | 1 |
| <i>circRTN4</i> | miR-6847-3p | 1 |
| <i>circRTN4</i> | miR-6854-5p | 3 |
| <i>circRTN4</i> | miR-6857-3p | 1 |
| <i>circRTN4</i> | miR-6858-3p | 4 |
| <i>circRTN4</i> | miR-6861-5p | 1 |
| <i>circRTN4</i> | miR-6868-3p | 5 |
| <i>circRTN4</i> | miR-6869-5p | 1 |
| <i>circRTN4</i> | miR-6870-3p | 1 |
| <i>circRTN4</i> | miR-6871-3p | 2 |
| <i>circRTN4</i> | miR-6871-5p | 2 |
| <i>circRTN4</i> | miR-6873-3p | 3 |
| <i>circRTN4</i> | miR-6874-5p | 1 |
| <i>circRTN4</i> | miR-6875-3p | 1 |
| <i>circRTN4</i> | miR-6881-3p | 2 |
| <i>circRTN4</i> | miR-6883-3p | 1 |
| <i>circRTN4</i> | miR-6885-3p | 1 |
| <i>circRTN4</i> | miR-6888-3p | 4 |
| <i>circRTN4</i> | miR-6888-5p | 2 |
| <i>circRTN4</i> | miR-6894-3p | 3 |
| <i>circRTN4</i> | miR-6894-5p | 3 |
| <i>circRTN4</i> | miR-6895-3p | 1 |
| <i>circRTN4</i> | miR-7-3p    | 2 |
| <i>circRTN4</i> | miR-7-5p    | 3 |
| <i>circRTN4</i> | miR-7106-3p | 1 |
| <i>circRTN4</i> | miR-7106-5p | 2 |
| <i>circRTN4</i> | miR-7111-3p | 2 |
| <i>circRTN4</i> | miR-7113-3p | 1 |
| <i>circRTN4</i> | miR-7113-5p | 1 |



|                 |              |   |
|-----------------|--------------|---|
| <i>circRTN4</i> | miR-7152-3p  | 2 |
| <i>circRTN4</i> | miR-7154-3p  | 3 |
| <i>circRTN4</i> | miR-7156-3p  | 2 |
| <i>circRTN4</i> | miR-7159-5p  | 4 |
| <i>circRTN4</i> | miR-7160-5p  | 2 |
| <i>circRTN4</i> | miR-759      | 2 |
| <i>circRTN4</i> | miR-764      | 2 |
| <i>circRTN4</i> | miR-765      | 3 |
| <i>circRTN4</i> | miR-766-3p   | 2 |
| <i>circRTN4</i> | miR-766-5p   | 3 |
| <i>circRTN4</i> | miR-767-5p   | 2 |
| <i>circRTN4</i> | miR-769-5p   | 1 |
| <i>circRTN4</i> | miR-770-5p   | 2 |
| <i>circRTN4</i> | miR-7843-3p  | 2 |
| <i>circRTN4</i> | miR-7844-5p  | 1 |
| <i>circRTN4</i> | miR-7848-3p  | 1 |
| <i>circRTN4</i> | miR-7850-5p  | 1 |
| <i>circRTN4</i> | miR-7856-5p  | 1 |
| <i>circRTN4</i> | miR-7975     | 2 |
| <i>circRTN4</i> | miR-7978     | 1 |
| <i>circRTN4</i> | miR-8055     | 2 |
| <i>circRTN4</i> | miR-8056     | 1 |
| <i>circRTN4</i> | miR-8060     | 2 |
| <i>circRTN4</i> | miR-8062     | 2 |
| <i>circRTN4</i> | miR-8076     | 2 |
| <i>circRTN4</i> | miR-8077     | 2 |
| <i>circRTN4</i> | miR-8081     | 1 |
| <i>circRTN4</i> | miR-8084     | 3 |
| <i>circRTN4</i> | miR-8086     | 1 |
| <i>circRTN4</i> | miR-873-3p   | 1 |
| <i>circRTN4</i> | miR-873-5p.1 | 2 |
| <i>circRTN4</i> | miR-876-5p   | 3 |
| <i>circRTN4</i> | miR-885-5p   | 1 |
| <i>circRTN4</i> | miR-888-3p   | 1 |
| <i>circRTN4</i> | miR-888-5p   | 1 |
| <i>circRTN4</i> | miR-890      | 2 |
| <i>circRTN4</i> | miR-891a-3p  | 1 |
| <i>circRTN4</i> | miR-891b     | 2 |

|                  |              |   |
|------------------|--------------|---|
| <i>circRTN4</i>  | miR-892a     | 1 |
| <i>circRTN4</i>  | miR-9-5p     | 1 |
| <i>circRTN4</i>  | miR-921      | 3 |
| <i>circRTN4</i>  | miR-922      | 2 |
| <i>circRTN4</i>  | miR-935      | 2 |
| <i>circRTN4</i>  | miR-937-5p   | 1 |
| <i>circRTN4</i>  | miR-943      | 1 |
| <i>circRTN4</i>  | miR-944      | 2 |
| <i>circRTN4</i>  | miR-9500     | 2 |
| <i>circRTN4</i>  | miR-99-3p    | 3 |
| <i>circSENP6</i> | miR-1-5p     | 1 |
| <i>circSENP6</i> | miR-101-3p.2 | 1 |
| <i>circSENP6</i> | miR-106a-3p  | 1 |
| <i>circSENP6</i> | miR-1178-5p  | 1 |
| <i>circSENP6</i> | miR-1179     | 2 |
| <i>circSENP6</i> | miR-1182     | 1 |
| <i>circSENP6</i> | miR-1183     | 1 |
| <i>circSENP6</i> | miR-1185-5p  | 1 |
| <i>circSENP6</i> | miR-1206     | 2 |
| <i>circSENP6</i> | miR-1208     | 2 |
| <i>circSENP6</i> | miR-1224-5p  | 1 |
| <i>circSENP6</i> | miR-1229-3p  | 1 |
| <i>circSENP6</i> | miR-124-5p   | 1 |
| <i>circSENP6</i> | miR-1250-3p  | 3 |
| <i>circSENP6</i> | miR-1272     | 1 |
| <i>circSENP6</i> | miR-129-5p   | 1 |
| <i>circSENP6</i> | miR-1295a    | 1 |
| <i>circSENP6</i> | miR-1298-5p  | 1 |
| <i>circSENP6</i> | miR-1304-3p  | 1 |
| <i>circSENP6</i> | miR-1322     | 1 |
| <i>circSENP6</i> | miR-135b-3p  | 1 |
| <i>circSENP6</i> | miR-136-5p   | 1 |
| <i>circSENP6</i> | miR-139-5p   | 1 |
| <i>circSENP6</i> | miR-141-5p   | 1 |
| <i>circSENP6</i> | miR-145-3p   | 1 |
| <i>circSENP6</i> | miR-147a     | 1 |
| <i>circSENP6</i> | miR-149-5p   | 1 |
| <i>circSENP6</i> | miR-153-3p   | 1 |

|                  |                          |   |
|------------------|--------------------------|---|
| <i>circSENP6</i> | miR-153-5p               | 1 |
| <i>circSENP6</i> | miR-1537-3p              | 1 |
| <i>circSENP6</i> | miR-15a-3p               | 1 |
| <i>circSENP6</i> | miR-15b-3p               | 1 |
| <i>circSENP6</i> | miR-16-1-3p              | 1 |
| <i>circSENP6</i> | miR-181-3p/4420          | 2 |
| <i>circSENP6</i> | miR-182-5p               | 1 |
| <i>circSENP6</i> | miR-183-3p               | 1 |
| <i>circSENP6</i> | miR-18a-3p               | 1 |
| <i>circSENP6</i> | miR-19-5p                | 1 |
| <i>circSENP6</i> | miR-1915-3p/6764-5p      | 1 |
| <i>circSENP6</i> | miR-193-3p               | 1 |
| <i>circSENP6</i> | miR-196b-3p              | 1 |
| <i>circSENP6</i> | miR-204-3p/4646-5p       | 1 |
| <i>circSENP6</i> | miR-205-3p               | 1 |
| <i>circSENP6</i> | miR-2052                 | 1 |
| <i>circSENP6</i> | miR-20a-3p               | 1 |
| <i>circSENP6</i> | miR-20b-3p               | 1 |
| <i>circSENP6</i> | miR-2113                 | 1 |
| <i>circSENP6</i> | miR-217                  | 2 |
| <i>circSENP6</i> | miR-223-5p               | 1 |
| <i>circSENP6</i> | miR-2277-3p              | 1 |
| <i>circSENP6</i> | miR-2681-5p              | 2 |
| <i>circSENP6</i> | miR-297                  | 2 |
| <i>circSENP6</i> | miR-298                  | 1 |
| <i>circSENP6</i> | miR-29a-5p               | 2 |
| <i>circSENP6</i> | miR-29b-1-5p             | 1 |
| <i>circSENP6</i> | miR-29b-2-5p             | 1 |
| <i>circSENP6</i> | miR-302a-5p              | 1 |
| <i>circSENP6</i> | miR-3074-5p              | 1 |
| <i>circSENP6</i> | miR-31-3p                | 1 |
| <i>circSENP6</i> | miR-3120-3p              | 1 |
| <i>circSENP6</i> | miR-3137                 | 1 |
| <i>circSENP6</i> | miR-3153/6733-5p/6739-5p | 1 |
| <i>circSENP6</i> | miR-3159                 | 2 |
| <i>circSENP6</i> | miR-3171                 | 1 |
| <i>circSENP6</i> | miR-3185                 | 2 |
| <i>circSENP6</i> | miR-3190-3p              | 1 |

|                  |                           |   |
|------------------|---------------------------|---|
| <i>circSENP6</i> | miR-3192-5p               | 1 |
| <i>circSENP6</i> | miR-3193                  | 1 |
| <i>circSENP6</i> | miR-324-3p/1913           | 1 |
| <i>circSENP6</i> | miR-335-3p                | 3 |
| <i>circSENP6</i> | miR-337-3p                | 2 |
| <i>circSENP6</i> | miR-33a-3p                | 1 |
| <i>circSENP6</i> | miR-34a-3p                | 2 |
| <i>circSENP6</i> | miR-3529-3p               | 1 |
| <i>circSENP6</i> | miR-3605-5p               | 1 |
| <i>circSENP6</i> | miR-361-5p                | 1 |
| <i>circSENP6</i> | miR-3611                  | 1 |
| <i>circSENP6</i> | miR-3617-3p               | 2 |
| <i>circSENP6</i> | miR-3668                  | 1 |
| <i>circSENP6</i> | miR-3686                  | 3 |
| <i>circSENP6</i> | miR-374b-3p               | 1 |
| <i>circSENP6</i> | miR-375                   | 1 |
| <i>circSENP6</i> | miR-376a-2-5p             | 1 |
| <i>circSENP6</i> | miR-376a-5p               | 1 |
| <i>circSENP6</i> | miR-377-3p                | 1 |
| <i>circSENP6</i> | miR-380-3p                | 1 |
| <i>circSENP6</i> | miR-381-3p                | 1 |
| <i>circSENP6</i> | miR-3909                  | 1 |
| <i>circSENP6</i> | miR-3911                  | 1 |
| <i>circSENP6</i> | miR-3915                  | 1 |
| <i>circSENP6</i> | miR-3927-5p               | 1 |
| <i>circSENP6</i> | miR-3935                  | 1 |
| <i>circSENP6</i> | miR-4261                  | 1 |
| <i>circSENP6</i> | miR-4271/4725-3p/6780b-5p | 1 |
| <i>circSENP6</i> | miR-4275                  | 1 |
| <i>circSENP6</i> | miR-4279                  | 1 |
| <i>circSENP6</i> | miR-4291                  | 1 |
| <i>circSENP6</i> | miR-4307                  | 2 |
| <i>circSENP6</i> | miR-4310/7157-5p          | 1 |
| <i>circSENP6</i> | miR-4314                  | 1 |
| <i>circSENP6</i> | miR-4438                  | 1 |
| <i>circSENP6</i> | miR-4452                  | 1 |
| <i>circSENP6</i> | miR-448                   | 1 |
| <i>circSENP6</i> | miR-450b-3p/769-3p        | 1 |

|                  |                          |   |
|------------------|--------------------------|---|
| <i>circSENP6</i> | miR-4529-5p              | 1 |
| <i>circSENP6</i> | miR-4540                 | 1 |
| <i>circSENP6</i> | miR-4652-3p              | 2 |
| <i>circSENP6</i> | miR-4655-5p              | 1 |
| <i>circSENP6</i> | miR-4659a-3p/4659b-3p    | 2 |
| <i>circSENP6</i> | miR-466                  | 1 |
| <i>circSENP6</i> | miR-4666a-3p             | 1 |
| <i>circSENP6</i> | miR-4668-5p              | 1 |
| <i>circSENP6</i> | miR-4689/6858-5p         | 1 |
| <i>circSENP6</i> | miR-4709-3p              | 1 |
| <i>circSENP6</i> | miR-4709-5p              | 1 |
| <i>circSENP6</i> | miR-4717-5p              | 1 |
| <i>circSENP6</i> | miR-4722-3p/6727-3p      | 1 |
| <i>circSENP6</i> | miR-4726-3p              | 1 |
| <i>circSENP6</i> | miR-4742-3p              | 3 |
| <i>circSENP6</i> | miR-4743-3p              | 2 |
| <i>circSENP6</i> | miR-4752                 | 1 |
| <i>circSENP6</i> | miR-4753-3p              | 1 |
| <i>circSENP6</i> | miR-4764-5p              | 1 |
| <i>circSENP6</i> | miR-4768-5p/6833-3p      | 1 |
| <i>circSENP6</i> | miR-4778-3p              | 1 |
| <i>circSENP6</i> | miR-4778-5p              | 1 |
| <i>circSENP6</i> | miR-484/3155             | 1 |
| <i>circSENP6</i> | miR-494-3p               | 1 |
| <i>circSENP6</i> | miR-495-3p               | 1 |
| <i>circSENP6</i> | miR-497-3p               | 1 |
| <i>circSENP6</i> | miR-5003-3p              | 1 |
| <i>circSENP6</i> | miR-5010-3p              | 1 |
| <i>circSENP6</i> | miR-505-5p               | 1 |
| <i>circSENP6</i> | miR-5089-5p              | 1 |
| <i>circSENP6</i> | miR-509-3-5p/509-5p/4418 | 2 |
| <i>circSENP6</i> | miR-509-3p               | 1 |
| <i>circSENP6</i> | miR-5095/7151-3p         | 1 |
| <i>circSENP6</i> | miR-5096                 | 3 |
| <i>circSENP6</i> | miR-511-3p               | 1 |
| <i>circSENP6</i> | miR-515-5p/519e-5p       | 1 |
| <i>circSENP6</i> | miR-5187-5p              | 1 |
| <i>circSENP6</i> | miR-5197-3p              | 2 |

|                  |                     |   |
|------------------|---------------------|---|
| <i>circSENP6</i> | miR-539-3p          | 1 |
| <i>circSENP6</i> | miR-543             | 1 |
| <i>circSENP6</i> | miR-5571-5p         | 1 |
| <i>circSENP6</i> | miR-5579-5p         | 1 |
| <i>circSENP6</i> | miR-5680            | 1 |
| <i>circSENP6</i> | miR-5690            | 1 |
| <i>circSENP6</i> | miR-5696            | 1 |
| <i>circSENP6</i> | miR-5704            | 1 |
| <i>circSENP6</i> | miR-579-3p          | 1 |
| <i>circSENP6</i> | miR-582-5p          | 1 |
| <i>circSENP6</i> | miR-618             | 1 |
| <i>circSENP6</i> | miR-619-5p/6506-5p  | 1 |
| <i>circSENP6</i> | miR-629-3p          | 1 |
| <i>circSENP6</i> | miR-644a            | 1 |
| <i>circSENP6</i> | miR-647             | 1 |
| <i>circSENP6</i> | miR-6504-3p         | 2 |
| <i>circSENP6</i> | miR-6505-5p         | 1 |
| <i>circSENP6</i> | miR-6509-5p         | 1 |
| <i>circSENP6</i> | miR-653-3p          | 2 |
| <i>circSENP6</i> | miR-659-3p          | 1 |
| <i>circSENP6</i> | miR-664a-5p/4794    | 1 |
| <i>circSENP6</i> | miR-668-3p          | 2 |
| <i>circSENP6</i> | miR-6715a-3p        | 1 |
| <i>circSENP6</i> | miR-6723-5p         | 1 |
| <i>circSENP6</i> | miR-6728-5p         | 1 |
| <i>circSENP6</i> | miR-6747-3p         | 1 |
| <i>circSENP6</i> | miR-675-3p          | 2 |
| <i>circSENP6</i> | miR-6757-3p         | 2 |
| <i>circSENP6</i> | miR-676-3p          | 2 |
| <i>circSENP6</i> | miR-676-5p          | 2 |
| <i>circSENP6</i> | miR-6760-3p         | 2 |
| <i>circSENP6</i> | miR-6777-5p/6889-5p | 1 |
| <i>circSENP6</i> | miR-6780a-3p        | 1 |
| <i>circSENP6</i> | miR-6784-5p         | 1 |
| <i>circSENP6</i> | miR-6794-3p         | 1 |
| <i>circSENP6</i> | miR-6804-5p         | 1 |
| <i>circSENP6</i> | miR-6806-5p         | 2 |
| <i>circSENP6</i> | miR-6809-3p         | 1 |

|                  |                     |   |
|------------------|---------------------|---|
| <i>circSENP6</i> | miR-6814-3p/6872-5p | 1 |
| <i>circSENP6</i> | miR-6818-5p         | 1 |
| <i>circSENP6</i> | miR-6833-5p         | 1 |
| <i>circSENP6</i> | miR-6838-3p         | 1 |
| <i>circSENP6</i> | miR-6840-3p         | 1 |
| <i>circSENP6</i> | miR-6842-3p         | 1 |
| <i>circSENP6</i> | miR-6845-3p         | 1 |
| <i>circSENP6</i> | miR-6853-3p         | 2 |
| <i>circSENP6</i> | miR-6856-3p         | 1 |
| <i>circSENP6</i> | miR-6875-3p         | 2 |
| <i>circSENP6</i> | miR-6881-3p         | 1 |
| <i>circSENP6</i> | miR-6890-3p         | 2 |
| <i>circSENP6</i> | miR-7111-3p         | 1 |
| <i>circSENP6</i> | miR-7150            | 1 |
| <i>circSENP6</i> | miR-7152-5p         | 1 |
| <i>circSENP6</i> | miR-758-3p          | 1 |
| <i>circSENP6</i> | miR-7852-3p         | 1 |
| <i>circSENP6</i> | miR-877-3p          | 1 |
| <i>circSENP6</i> | miR-891b            | 1 |
| <i>circSENP6</i> | miR-9-5p            | 1 |
| <i>circSENP6</i> | miR-942-5p          | 1 |
| <i>circSENP6</i> | miR-96-5p/1271-5p   | 1 |
| <i>circSENP6</i> | miR-1184            | 1 |
| <i>circSENP6</i> | miR-1200            | 1 |
| <i>circSENP6</i> | miR-1205            | 1 |
| <i>circSENP6</i> | miR-1253            | 1 |
| <i>circSENP6</i> | miR-125a-3p         | 1 |
| <i>circSENP6</i> | miR-1273g-3p        | 1 |
| <i>circSENP6</i> | miR-1343-3p         | 1 |
| <i>circSENP6</i> | miR-136-3p          | 1 |
| <i>circSENP6</i> | miR-138-2-3p        | 1 |
| <i>circSENP6</i> | miR-143-5p          | 1 |
| <i>circSENP6</i> | miR-151-5p          | 1 |
| <i>circSENP6</i> | miR-17-3p           | 1 |
| <i>circSENP6</i> | miR-181a-3p         | 1 |
| <i>circSENP6</i> | miR-203b-3p         | 1 |
| <i>circSENP6</i> | miR-302b-5p/302d-5p | 1 |
| <i>circSENP6</i> | miR-3119            | 1 |

|                  |                     |   |
|------------------|---------------------|---|
| <i>circSENP6</i> | miR-3151-3p         | 1 |
| <i>circSENP6</i> | miR-3158-5p         | 1 |
| <i>circSENP6</i> | miR-3182            | 1 |
| <i>circSENP6</i> | miR-3192-3p         | 1 |
| <i>circSENP6</i> | miR-365-3p          | 1 |
| <i>circSENP6</i> | miR-378a-5p         | 1 |
| <i>circSENP6</i> | miR-381-5p          | 1 |
| <i>circSENP6</i> | miR-3920            | 1 |
| <i>circSENP6</i> | miR-3928-3p         | 1 |
| <i>circSENP6</i> | miR-3934-5p         | 1 |
| <i>circSENP6</i> | miR-411-5p.2        | 1 |
| <i>circSENP6</i> | miR-4251            | 1 |
| <i>circSENP6</i> | miR-4252            | 1 |
| <i>circSENP6</i> | miR-4267            | 1 |
| <i>circSENP6</i> | miR-4303            | 1 |
| <i>circSENP6</i> | miR-4329            | 1 |
| <i>circSENP6</i> | miR-4474-5p         | 1 |
| <i>circSENP6</i> | miR-4503            | 1 |
| <i>circSENP6</i> | miR-452-3p          | 1 |
| <i>circSENP6</i> | miR-4539            | 1 |
| <i>circSENP6</i> | miR-455-3p.2        | 1 |
| <i>circSENP6</i> | miR-4715-3p         | 1 |
| <i>circSENP6</i> | miR-4720-3p         | 1 |
| <i>circSENP6</i> | miR-4762-3p         | 2 |
| <i>circSENP6</i> | miR-4793-5p         | 1 |
| <i>circSENP6</i> | miR-4804-3p         | 1 |
| <i>circSENP6</i> | miR-487a-5p/487b-5p | 1 |
| <i>circSENP6</i> | miR-498             | 1 |
| <i>circSENP6</i> | miR-5000-5p         | 1 |
| <i>circSENP6</i> | miR-5196-3p         | 1 |
| <i>circSENP6</i> | miR-5683            | 1 |
| <i>circSENP6</i> | miR-580-3p          | 1 |
| <i>circSENP6</i> | miR-611/3131        | 1 |
| <i>circSENP6</i> | miR-634             | 1 |
| <i>circSENP6</i> | miR-664a-3p         | 1 |
| <i>circSENP6</i> | miR-6755-3p         | 1 |
| <i>circSENP6</i> | miR-6761-5p         | 1 |
| <i>circSENP6</i> | miR-6770-5p         | 1 |



|                   |                                      |   |
|-------------------|--------------------------------------|---|
| <i>circSENP6</i>  | miR-6785-3p                          | 1 |
| <i>circSENP6</i>  | miR-6885-3p                          | 1 |
| <i>circSENP6</i>  | miR-7151-5p                          | 1 |
| <i>circSENP6</i>  | miR-7158-3p                          | 1 |
| <i>circSENP6</i>  | miR-7641                             | 1 |
| <i>circSFMBT2</i> | miR-103-3p/107                       | 1 |
| <i>circSFMBT2</i> | miR-1227-5p                          | 2 |
| <i>circSFMBT2</i> | miR-1238-5p/4758-5p                  | 2 |
| <i>circSFMBT2</i> | miR-124-5p                           | 2 |
| <i>circSFMBT2</i> | miR-127-5p                           | 3 |
| <i>circSFMBT2</i> | miR-1286                             | 1 |
| <i>circSFMBT2</i> | miR-1298-5p                          | 1 |
| <i>circSFMBT2</i> | miR-146-5p                           | 3 |
| <i>circSFMBT2</i> | miR-1468-5p                          | 1 |
| <i>circSFMBT2</i> | miR-146a-3p                          | 2 |
| <i>circSFMBT2</i> | miR-1470                             | 1 |
| <i>circSFMBT2</i> | miR-147a                             | 4 |
| <i>circSFMBT2</i> | miR-15-5p/16-5p/195-5p/424-5p/497-5p | 1 |
| <i>circSFMBT2</i> | miR-186-5p                           | 1 |
| <i>circSFMBT2</i> | miR-1915-3p/6764-5p                  | 1 |
| <i>circSFMBT2</i> | miR-210-5p                           | 2 |
| <i>circSFMBT2</i> | miR-299-3p                           | 2 |
| <i>circSFMBT2</i> | miR-3133                             | 1 |
| <i>circSFMBT2</i> | miR-3169                             | 1 |
| <i>circSFMBT2</i> | miR-3176/3922-3p                     | 1 |
| <i>circSFMBT2</i> | miR-3178                             | 1 |
| <i>circSFMBT2</i> | miR-3179                             | 4 |
| <i>circSFMBT2</i> | miR-3180-3p                          | 2 |
| <i>circSFMBT2</i> | miR-3187-3p                          | 1 |
| <i>circSFMBT2</i> | miR-3190-5p                          | 1 |
| <i>circSFMBT2</i> | miR-320e                             | 2 |
| <i>circSFMBT2</i> | miR-326                              | 2 |
| <i>circSFMBT2</i> | miR-329-5p                           | 1 |
| <i>circSFMBT2</i> | miR-3605-3p                          | 1 |
| <i>circSFMBT2</i> | miR-3611                             | 5 |
| <i>circSFMBT2</i> | miR-3622a-3p/3622b-3p                | 1 |
| <i>circSFMBT2</i> | miR-3659                             | 1 |
| <i>circSFMBT2</i> | miR-3664-5p                          | 2 |

|                   |                     |   |
|-------------------|---------------------|---|
| <i>circSFMBT2</i> | miR-3675-5p         | 3 |
| <i>circSFMBT2</i> | miR-3690            | 2 |
| <i>circSFMBT2</i> | miR-374a-3p         | 1 |
| <i>circSFMBT2</i> | miR-377-5p/6086     | 1 |
| <i>circSFMBT2</i> | miR-378g            | 2 |
| <i>circSFMBT2</i> | miR-382-3p          | 3 |
| <i>circSFMBT2</i> | miR-3911            | 3 |
| <i>circSFMBT2</i> | miR-3928-5p/6806-3p | 2 |
| <i>circSFMBT2</i> | miR-3936            | 4 |
| <i>circSFMBT2</i> | miR-3943            | 1 |
| <i>circSFMBT2</i> | miR-412-3p/6754-3p  | 2 |
| <i>circSFMBT2</i> | miR-4254            | 2 |
| <i>circSFMBT2</i> | miR-4287/4685-3p    | 2 |
| <i>circSFMBT2</i> | miR-4310/7157-5p    | 1 |
| <i>circSFMBT2</i> | miR-4318            | 3 |
| <i>circSFMBT2</i> | miR-4323            | 1 |
| <i>circSFMBT2</i> | miR-4433a-3p        | 1 |
| <i>circSFMBT2</i> | miR-4434/4516/5703  | 2 |
| <i>circSFMBT2</i> | miR-4435            | 1 |
| <i>circSFMBT2</i> | miR-4457            | 1 |
| <i>circSFMBT2</i> | miR-4459            | 1 |
| <i>circSFMBT2</i> | miR-4464/4748       | 2 |
| <i>circSFMBT2</i> | miR-4467            | 1 |
| <i>circSFMBT2</i> | miR-4469            | 2 |
| <i>circSFMBT2</i> | miR-4474-3p         | 2 |
| <i>circSFMBT2</i> | miR-4476/6876-5p    | 3 |
| <i>circSFMBT2</i> | miR-4486            | 2 |
| <i>circSFMBT2</i> | miR-4491/4657       | 2 |
| <i>circSFMBT2</i> | miR-4511            | 1 |
| <i>circSFMBT2</i> | miR-4635            | 1 |
| <i>circSFMBT2</i> | miR-4658/6790-5p    | 2 |
| <i>circSFMBT2</i> | miR-466             | 4 |
| <i>circSFMBT2</i> | miR-4667-3p         | 1 |
| <i>circSFMBT2</i> | miR-4670-3p         | 1 |
| <i>circSFMBT2</i> | miR-4677-3p         | 2 |
| <i>circSFMBT2</i> | miR-4679            | 2 |
| <i>circSFMBT2</i> | miR-4688/6743-5p    | 2 |
| <i>circSFMBT2</i> | miR-4714-5p         | 2 |

|                   |                                      |   |
|-------------------|--------------------------------------|---|
| <i>circSFMBT2</i> | miR-4719                             | 2 |
| <i>circSFMBT2</i> | miR-4722-5p                          | 1 |
| <i>circSFMBT2</i> | miR-4726-3p                          | 1 |
| <i>circSFMBT2</i> | miR-4738-3p                          | 2 |
| <i>circSFMBT2</i> | miR-4749-3p                          | 2 |
| <i>circSFMBT2</i> | miR-4755-3p                          | 1 |
| <i>circSFMBT2</i> | miR-4757-5p/6744-3p                  | 2 |
| <i>circSFMBT2</i> | miR-4759                             | 1 |
| <i>circSFMBT2</i> | miR-4768-3p                          | 1 |
| <i>circSFMBT2</i> | miR-4773                             | 2 |
| <i>circSFMBT2</i> | miR-4786-3p                          | 2 |
| <i>circSFMBT2</i> | miR-499a-3p/499b-3p                  | 1 |
| <i>circSFMBT2</i> | miR-5000-3p                          | 1 |
| <i>circSFMBT2</i> | miR-503-5p                           | 1 |
| <i>circSFMBT2</i> | miR-506-5p                           | 1 |
| <i>circSFMBT2</i> | miR-5096                             | 1 |
| <i>circSFMBT2</i> | miR-513b-5p                          | 3 |
| <i>circSFMBT2</i> | miR-514a-5p                          | 2 |
| <i>circSFMBT2</i> | miR-518c-5p                          | 2 |
| <i>circSFMBT2</i> | miR-548b-3p                          | 1 |
| <i>circSFMBT2</i> | miR-548s                             | 1 |
| <i>circSFMBT2</i> | miR-5586-5p                          | 1 |
| <i>circSFMBT2</i> | miR-574-5p                           | 1 |
| <i>circSFMBT2</i> | miR-588                              | 1 |
| <i>circSFMBT2</i> | miR-589-5p                           | 3 |
| <i>circSFMBT2</i> | miR-6079                             | 3 |
| <i>circSFMBT2</i> | miR-6085/6813-5p                     | 2 |
| <i>circSFMBT2</i> | miR-612/1285-3p/3187-5p/5189-5p/6860 | 2 |
| <i>circSFMBT2</i> | miR-6126                             | 1 |
| <i>circSFMBT2</i> | miR-6128                             | 3 |
| <i>circSFMBT2</i> | miR-617                              | 2 |
| <i>circSFMBT2</i> | miR-619-3p                           | 1 |
| <i>circSFMBT2</i> | miR-644a                             | 3 |
| <i>circSFMBT2</i> | miR-646                              | 1 |
| <i>circSFMBT2</i> | miR-648                              | 2 |
| <i>circSFMBT2</i> | miR-6505-3p                          | 2 |
| <i>circSFMBT2</i> | miR-653-5p                           | 3 |
| <i>circSFMBT2</i> | miR-655-5p                           | 1 |

|                   |                                       |   |
|-------------------|---------------------------------------|---|
| <i>circSFMBT2</i> | miR-663b                              | 1 |
| <i>circSFMBT2</i> | miR-671-5p                            | 1 |
| <i>circSFMBT2</i> | miR-6721-5p                           | 2 |
| <i>circSFMBT2</i> | miR-6722-5p                           | 1 |
| <i>circSFMBT2</i> | miR-6764-3p/6824-3p                   | 2 |
| <i>circSFMBT2</i> | miR-6765-3p                           | 1 |
| <i>circSFMBT2</i> | miR-6769a-3p                          | 1 |
| <i>circSFMBT2</i> | miR-6778-3p                           | 2 |
| <i>circSFMBT2</i> | miR-6791-3p/6829-3p                   | 2 |
| <i>circSFMBT2</i> | miR-6795-3p                           | 1 |
| <i>circSFMBT2</i> | miR-6815-3p                           | 1 |
| <i>circSFMBT2</i> | miR-6818-5p                           | 4 |
| <i>circSFMBT2</i> | miR-6828-5p                           | 1 |
| <i>circSFMBT2</i> | miR-6837-3p                           | 2 |
| <i>circSFMBT2</i> | miR-6840-3p                           | 1 |
| <i>circSFMBT2</i> | miR-6864-5p                           | 1 |
| <i>circSFMBT2</i> | miR-6867-5p                           | 2 |
| <i>circSFMBT2</i> | miR-6878-3p                           | 2 |
| <i>circSFMBT2</i> | miR-6887-3p                           | 1 |
| <i>circSFMBT2</i> | miR-6888-5p                           | 2 |
| <i>circSFMBT2</i> | miR-6890-5p                           | 3 |
| <i>circSFMBT2</i> | miR-7108-5p                           | 2 |
| <i>circSFMBT2</i> | miR-7113-3p                           | 2 |
| <i>circSFMBT2</i> | miR-7515                              | 4 |
| <i>circSFMBT2</i> | miR-758-3p                            | 3 |
| <i>circSFMBT2</i> | miR-7843-3p                           | 3 |
| <i>circSFMBT2</i> | miR-7851-3p                           | 1 |
| <i>circSFMBT2</i> | miR-8060                              | 1 |
| <i>circSFMBT2</i> | miR-8066                              | 1 |
| <i>circSFMBT2</i> | miR-8083                              | 1 |
| <i>circSFMBT2</i> | miR-873-5p.1                          | 3 |
| <i>circSFMBT2</i> | miR-873-5p.2                          | 1 |
| <i>circSFMBT2</i> | miR-892-5p                            | 1 |
| <i>circSFMBT2</i> | miR-892a                              | 3 |
| <i>circSFMBT2</i> | miR-892b                              | 1 |
| <i>circSFMBT2</i> | let-7a-3p/let-7b-3p/let-7f-1-3p/98-3p | 2 |
| <i>circSFMBT2</i> | let-7f-2-3p/1185-3p                   | 2 |
| <i>circSFMBT2</i> | miR-1-3p/206                          | 1 |

|                   |                     |   |
|-------------------|---------------------|---|
| <i>circSFMBT2</i> | miR-1-5p            | 1 |
| <i>circSFMBT2</i> | miR-101-3p.1        | 1 |
| <i>circSFMBT2</i> | miR-101-3p.2        | 2 |
| <i>circSFMBT2</i> | miR-105-5p          | 1 |
| <i>circSFMBT2</i> | miR-106a-3p         | 1 |
| <i>circSFMBT2</i> | miR-1179            | 1 |
| <i>circSFMBT2</i> | miR-1180-5p         | 1 |
| <i>circSFMBT2</i> | miR-1184            | 1 |
| <i>circSFMBT2</i> | miR-1197            | 4 |
| <i>circSFMBT2</i> | miR-1199-3p         | 1 |
| <i>circSFMBT2</i> | miR-1200            | 1 |
| <i>circSFMBT2</i> | miR-1202/3972       | 1 |
| <i>circSFMBT2</i> | miR-1205            | 1 |
| <i>circSFMBT2</i> | miR-1206            | 2 |
| <i>circSFMBT2</i> | miR-1208            | 2 |
| <i>circSFMBT2</i> | miR-1224-3p         | 1 |
| <i>circSFMBT2</i> | miR-1225-5p         | 1 |
| <i>circSFMBT2</i> | miR-1227-3p         | 1 |
| <i>circSFMBT2</i> | miR-1229-3p         | 1 |
| <i>circSFMBT2</i> | miR-1229-5p         | 1 |
| <i>circSFMBT2</i> | miR-1231            | 2 |
| <i>circSFMBT2</i> | miR-1233-3p         | 1 |
| <i>circSFMBT2</i> | miR-1233-5p/6778-5p | 2 |
| <i>circSFMBT2</i> | miR-1236-3p         | 2 |
| <i>circSFMBT2</i> | miR-1236-5p         | 1 |
| <i>circSFMBT2</i> | miR-1237-3p         | 1 |
| <i>circSFMBT2</i> | miR-1238-3p         | 2 |
| <i>circSFMBT2</i> | miR-124-3p.1        | 1 |
| <i>circSFMBT2</i> | miR-1243            | 3 |
| <i>circSFMBT2</i> | miR-1244            | 1 |
| <i>circSFMBT2</i> | miR-1245b-3p        | 1 |
| <i>circSFMBT2</i> | miR-1246            | 1 |
| <i>circSFMBT2</i> | miR-1247-3p         | 1 |
| <i>circSFMBT2</i> | miR-1248            | 1 |
| <i>circSFMBT2</i> | miR-1249-5p/6797-5p | 2 |
| <i>circSFMBT2</i> | miR-1250-3p         | 2 |
| <i>circSFMBT2</i> | miR-1252-3p         | 2 |
| <i>circSFMBT2</i> | miR-1253            | 2 |

|                   |                     |   |
|-------------------|---------------------|---|
| <i>circSFMBT2</i> | miR-1255a/1255b-5p  | 2 |
| <i>circSFMBT2</i> | miR-1256            | 1 |
| <i>circSFMBT2</i> | miR-1257            | 3 |
| <i>circSFMBT2</i> | miR-125a-3p         | 1 |
| <i>circSFMBT2</i> | miR-125b-1-3p       | 1 |
| <i>circSFMBT2</i> | miR-125b-2-3p       | 1 |
| <i>circSFMBT2</i> | miR-126-5p          | 1 |
| <i>circSFMBT2</i> | miR-1261            | 2 |
| <i>circSFMBT2</i> | miR-1265            | 2 |
| <i>circSFMBT2</i> | miR-1267            | 1 |
| <i>circSFMBT2</i> | miR-1272            | 2 |
| <i>circSFMBT2</i> | miR-1273g-5p        | 1 |
| <i>circSFMBT2</i> | miR-1273h-3p        | 2 |
| <i>circSFMBT2</i> | miR-1276            | 2 |
| <i>circSFMBT2</i> | miR-1277-5p         | 3 |
| <i>circSFMBT2</i> | miR-1278            | 1 |
| <i>circSFMBT2</i> | miR-1279            | 2 |
| <i>circSFMBT2</i> | miR-128-3p          | 1 |
| <i>circSFMBT2</i> | miR-1282            | 1 |
| <i>circSFMBT2</i> | miR-1283            | 1 |
| <i>circSFMBT2</i> | miR-1288-5p         | 1 |
| <i>circSFMBT2</i> | miR-1289            | 1 |
| <i>circSFMBT2</i> | miR-129-3p          | 1 |
| <i>circSFMBT2</i> | miR-129-5p          | 1 |
| <i>circSFMBT2</i> | miR-1290            | 2 |
| <i>circSFMBT2</i> | miR-1291/6775-3p    | 1 |
| <i>circSFMBT2</i> | miR-1292-5p         | 1 |
| <i>circSFMBT2</i> | miR-1293/4483       | 2 |
| <i>circSFMBT2</i> | miR-1295b-3p        | 1 |
| <i>circSFMBT2</i> | miR-1298-3p         | 1 |
| <i>circSFMBT2</i> | miR-1299            | 1 |
| <i>circSFMBT2</i> | miR-1301-5p/6502-5p | 1 |
| <i>circSFMBT2</i> | miR-1303            | 2 |
| <i>circSFMBT2</i> | miR-1304-3p         | 2 |
| <i>circSFMBT2</i> | miR-1305            | 2 |
| <i>circSFMBT2</i> | miR-1306-5p         | 1 |
| <i>circSFMBT2</i> | miR-130b-5p         | 3 |
| <i>circSFMBT2</i> | miR-1322            | 2 |

|                   |                                    |   |
|-------------------|------------------------------------|---|
| <i>circSFMBT2</i> | miR-1324                           | 1 |
| <i>circSFMBT2</i> | miR-133a-3p.2/133b                 | 1 |
| <i>circSFMBT2</i> | miR-134-3p                         | 2 |
| <i>circSFMBT2</i> | miR-134-5p                         | 5 |
| <i>circSFMBT2</i> | miR-1343-3p                        | 1 |
| <i>circSFMBT2</i> | miR-138-2-3p                       | 2 |
| <i>circSFMBT2</i> | miR-140-5p                         | 1 |
| <i>circSFMBT2</i> | miR-141-5p                         | 2 |
| <i>circSFMBT2</i> | miR-142-3p.2                       | 1 |
| <i>circSFMBT2</i> | miR-144-3p                         | 1 |
| <i>circSFMBT2</i> | miR-147b                           | 1 |
| <i>circSFMBT2</i> | miR-149-3p/4728-5p/6785-5p/6883-5p | 2 |
| <i>circSFMBT2</i> | miR-149-5p                         | 1 |
| <i>circSFMBT2</i> | miR-150-5p                         | 1 |
| <i>circSFMBT2</i> | miR-151-5p                         | 2 |
| <i>circSFMBT2</i> | miR-153-3p                         | 1 |
| <i>circSFMBT2</i> | miR-1537-3p                        | 1 |
| <i>circSFMBT2</i> | miR-1539                           | 1 |
| <i>circSFMBT2</i> | miR-154-3p/487-3p                  | 2 |
| <i>circSFMBT2</i> | miR-155-3p                         | 1 |
| <i>circSFMBT2</i> | miR-1587/3620-5p                   | 1 |
| <i>circSFMBT2</i> | miR-15b-3p                         | 1 |
| <i>circSFMBT2</i> | miR-16-1-3p                        | 1 |
| <i>circSFMBT2</i> | miR-16-2-3p/195-3p                 | 1 |
| <i>circSFMBT2</i> | miR-17-3p                          | 1 |
| <i>circSFMBT2</i> | miR-18-5p                          | 2 |
| <i>circSFMBT2</i> | miR-181-3p/4420                    | 1 |
| <i>circSFMBT2</i> | miR-181-5p                         | 1 |
| <i>circSFMBT2</i> | miR-182-3p                         | 3 |
| <i>circSFMBT2</i> | miR-1825                           | 1 |
| <i>circSFMBT2</i> | miR-183-3p                         | 3 |
| <i>circSFMBT2</i> | miR-183-5p.1                       | 2 |
| <i>circSFMBT2</i> | miR-185-3p                         | 2 |
| <i>circSFMBT2</i> | miR-186-3p                         | 1 |
| <i>circSFMBT2</i> | miR-188-5p                         | 1 |
| <i>circSFMBT2</i> | miR-18b-3p                         | 1 |
| <i>circSFMBT2</i> | miR-19-5p                          | 3 |
| <i>circSFMBT2</i> | miR-190a-3p                        | 1 |

|                   |                     |   |
|-------------------|---------------------|---|
| <i>circSFMBT2</i> | miR-1911-3p         | 1 |
| <i>circSFMBT2</i> | miR-1911-5p         | 1 |
| <i>circSFMBT2</i> | miR-1914-5p         | 1 |
| <i>circSFMBT2</i> | miR-192-3p          | 1 |
| <i>circSFMBT2</i> | miR-192-5p/215-5p   | 1 |
| <i>circSFMBT2</i> | miR-193b-5p         | 1 |
| <i>circSFMBT2</i> | miR-194-3p          | 2 |
| <i>circSFMBT2</i> | miR-196b-3p         | 3 |
| <i>circSFMBT2</i> | miR-197-5p/3132     | 1 |
| <i>circSFMBT2</i> | miR-1976            | 2 |
| <i>circSFMBT2</i> | miR-198             | 1 |
| <i>circSFMBT2</i> | miR-199-3p          | 1 |
| <i>circSFMBT2</i> | miR-199-5p          | 1 |
| <i>circSFMBT2</i> | miR-200ab-5p        | 1 |
| <i>circSFMBT2</i> | miR-202-3p          | 2 |
| <i>circSFMBT2</i> | miR-202-5p          | 2 |
| <i>circSFMBT2</i> | miR-203a-3p.1       | 3 |
| <i>circSFMBT2</i> | miR-203a-5p         | 1 |
| <i>circSFMBT2</i> | miR-203b-5p/6718-5p | 2 |
| <i>circSFMBT2</i> | miR-204-3p/4646-5p  | 2 |
| <i>circSFMBT2</i> | miR-204-5p/211-5p   | 3 |
| <i>circSFMBT2</i> | miR-205-3p          | 1 |
| <i>circSFMBT2</i> | miR-205-5p          | 2 |
| <i>circSFMBT2</i> | miR-2052            | 3 |
| <i>circSFMBT2</i> | miR-2053            | 2 |
| <i>circSFMBT2</i> | miR-208-3p          | 1 |
| <i>circSFMBT2</i> | miR-20b-3p          | 1 |
| <i>circSFMBT2</i> | miR-21-3p/3591-3p   | 1 |
| <i>circSFMBT2</i> | miR-21-5p/590-5p    | 1 |
| <i>circSFMBT2</i> | miR-210-3p          | 1 |
| <i>circSFMBT2</i> | miR-211-3p          | 1 |
| <i>circSFMBT2</i> | miR-2110            | 1 |
| <i>circSFMBT2</i> | miR-2113            | 1 |
| <i>circSFMBT2</i> | miR-2115-5p         | 1 |
| <i>circSFMBT2</i> | miR-2116-3p         | 1 |
| <i>circSFMBT2</i> | miR-212-5p          | 1 |
| <i>circSFMBT2</i> | miR-214-3p/3619-5p  | 1 |
| <i>circSFMBT2</i> | miR-215-3p          | 2 |



|                   |                                              |   |
|-------------------|----------------------------------------------|---|
| <i>circSFMBT2</i> | miR-218-1-3p                                 | 3 |
| <i>circSFMBT2</i> | miR-218-2-3p                                 | 3 |
| <i>circSFMBT2</i> | miR-218-5p                                   | 1 |
| <i>circSFMBT2</i> | miR-219-5p                                   | 1 |
| <i>circSFMBT2</i> | miR-219b-5p                                  | 1 |
| <i>circSFMBT2</i> | miR-222-5p                                   | 1 |
| <i>circSFMBT2</i> | miR-223-5p                                   | 5 |
| <i>circSFMBT2</i> | miR-2276-5p                                  | 1 |
| <i>circSFMBT2</i> | miR-2277-3p                                  | 3 |
| <i>circSFMBT2</i> | miR-2278                                     | 2 |
| <i>circSFMBT2</i> | miR-23-3p                                    | 1 |
| <i>circSFMBT2</i> | miR-23-5p                                    | 1 |
| <i>circSFMBT2</i> | miR-2355-3p                                  | 1 |
| <i>circSFMBT2</i> | miR-2392                                     | 2 |
| <i>circSFMBT2</i> | miR-24-5p                                    | 1 |
| <i>circSFMBT2</i> | miR-26-5p                                    | 1 |
| <i>circSFMBT2</i> | miR-2681-3p                                  | 1 |
| <i>circSFMBT2</i> | miR-2681-5p                                  | 3 |
| <i>circSFMBT2</i> | miR-2682-3p/6781-3p                          | 3 |
| <i>circSFMBT2</i> | miR-26b-3p                                   | 1 |
| <i>circSFMBT2</i> | miR-27-3p                                    | 1 |
| <i>circSFMBT2</i> | miR-29-3p                                    | 4 |
| <i>circSFMBT2</i> | miR-297                                      | 2 |
| <i>circSFMBT2</i> | miR-299-5p                                   | 1 |
| <i>circSFMBT2</i> | miR-29a-5p                                   | 3 |
| <i>circSFMBT2</i> | miR-29b-1-5p                                 | 2 |
| <i>circSFMBT2</i> | miR-29b-2-5p                                 | 1 |
| <i>circSFMBT2</i> | miR-30-3p                                    | 2 |
| <i>circSFMBT2</i> | miR-30-5p                                    | 2 |
| <i>circSFMBT2</i> | miR-301a-5p/301b-5p                          | 2 |
| <i>circSFMBT2</i> | miR-302a-5p                                  | 4 |
| <i>circSFMBT2</i> | miR-302b-5p/302d-5p                          | 1 |
| <i>circSFMBT2</i> | miR-302c-5p                                  | 3 |
| <i>circSFMBT2</i> | miR-3064-3p                                  | 1 |
| <i>circSFMBT2</i> | miR-3065-3p                                  | 3 |
| <i>circSFMBT2</i> | miR-3074-3p                                  | 1 |
| <i>circSFMBT2</i> | miR-30b-3p/1273h-5p/3689-3p/6779-5p/6780a-5p |   |
| <i>circSFMBT2</i> | miR-30c-3p/6788-5p                           | 1 |

|                   |                          |   |
|-------------------|--------------------------|---|
| <i>circSFMBT2</i> | miR-31-3p                | 1 |
| <i>circSFMBT2</i> | miR-31-5p                | 1 |
| <i>circSFMBT2</i> | miR-3117-5p              | 2 |
| <i>circSFMBT2</i> | miR-3120-3p              | 3 |
| <i>circSFMBT2</i> | miR-3120-5p              | 1 |
| <i>circSFMBT2</i> | miR-3121-3p              | 1 |
| <i>circSFMBT2</i> | miR-3121-5p              | 2 |
| <i>circSFMBT2</i> | miR-3122/3913-5p         | 1 |
| <i>circSFMBT2</i> | miR-3123                 | 4 |
| <i>circSFMBT2</i> | miR-3124-3p              | 2 |
| <i>circSFMBT2</i> | miR-3125/3916/6859-5p    | 1 |
| <i>circSFMBT2</i> | miR-3126-3p              | 1 |
| <i>circSFMBT2</i> | miR-3126-5p              | 3 |
| <i>circSFMBT2</i> | miR-3136-5p/4439         | 3 |
| <i>circSFMBT2</i> | miR-3137                 | 1 |
| <i>circSFMBT2</i> | miR-3140-5p              | 2 |
| <i>circSFMBT2</i> | miR-3145-3p              | 1 |
| <i>circSFMBT2</i> | miR-3146                 | 2 |
| <i>circSFMBT2</i> | miR-3147                 | 1 |
| <i>circSFMBT2</i> | miR-3148                 | 4 |
| <i>circSFMBT2</i> | miR-3149                 | 2 |
| <i>circSFMBT2</i> | miR-3150a-3p             | 1 |
| <i>circSFMBT2</i> | miR-3150a-5p/3150b-5p    | 2 |
| <i>circSFMBT2</i> | miR-3150b-3p             | 1 |
| <i>circSFMBT2</i> | miR-3151-3p              | 1 |
| <i>circSFMBT2</i> | miR-3151-5p              | 1 |
| <i>circSFMBT2</i> | miR-3152-3p              | 1 |
| <i>circSFMBT2</i> | miR-3152-5p              | 2 |
| <i>circSFMBT2</i> | miR-3153/6733-5p/6739-5p | 3 |
| <i>circSFMBT2</i> | miR-3154                 | 2 |
| <i>circSFMBT2</i> | miR-3156-5p              | 2 |
| <i>circSFMBT2</i> | miR-3157-5p              | 1 |
| <i>circSFMBT2</i> | miR-3158-5p              | 1 |
| <i>circSFMBT2</i> | miR-3159                 | 1 |
| <i>circSFMBT2</i> | miR-3160-5p              | 1 |
| <i>circSFMBT2</i> | miR-3161                 | 1 |
| <i>circSFMBT2</i> | miR-3164                 | 5 |
| <i>circSFMBT2</i> | miR-3165                 | 1 |

|                   |                           |   |
|-------------------|---------------------------|---|
| <i>circSFMBT2</i> | miR-3166                  | 1 |
| <i>circSFMBT2</i> | miR-3170/6855-5p          | 2 |
| <i>circSFMBT2</i> | miR-3171                  | 1 |
| <i>circSFMBT2</i> | miR-3182                  | 2 |
| <i>circSFMBT2</i> | miR-3185                  | 1 |
| <i>circSFMBT2</i> | miR-3189-3p               | 1 |
| <i>circSFMBT2</i> | miR-3191-5p               | 1 |
| <i>circSFMBT2</i> | miR-3192-5p               | 2 |
| <i>circSFMBT2</i> | miR-3193                  | 1 |
| <i>circSFMBT2</i> | miR-3194-3p               | 1 |
| <i>circSFMBT2</i> | miR-3198/4309             | 2 |
| <i>circSFMBT2</i> | miR-32-3p                 | 2 |
| <i>circSFMBT2</i> | miR-320                   | 1 |
| <i>circSFMBT2</i> | miR-3200-3p               | 1 |
| <i>circSFMBT2</i> | miR-3200-5p               | 1 |
| <i>circSFMBT2</i> | miR-3202                  | 3 |
| <i>circSFMBT2</i> | miR-323b-3p               | 1 |
| <i>circSFMBT2</i> | miR-323b-5p/410-5p/494-5p | 1 |
| <i>circSFMBT2</i> | miR-329-3p/362-3p         | 3 |
| <i>circSFMBT2</i> | miR-330-3p                | 1 |
| <i>circSFMBT2</i> | miR-330-3p.2              | 2 |
| <i>circSFMBT2</i> | miR-331-3p                | 1 |
| <i>circSFMBT2</i> | miR-335-3p                | 4 |
| <i>circSFMBT2</i> | miR-335-5p                | 2 |
| <i>circSFMBT2</i> | miR-337-3p                | 3 |
| <i>circSFMBT2</i> | miR-338-5p                | 1 |
| <i>circSFMBT2</i> | miR-339-5p                | 1 |
| <i>circSFMBT2</i> | miR-33a-3p                | 3 |
| <i>circSFMBT2</i> | miR-34-5p/449-5p          | 1 |
| <i>circSFMBT2</i> | miR-340-5p                | 1 |
| <i>circSFMBT2</i> | miR-342-5p/4664-5p        | 2 |
| <i>circSFMBT2</i> | miR-345-3p                | 2 |
| <i>circSFMBT2</i> | miR-34a-3p                | 1 |
| <i>circSFMBT2</i> | miR-34b-3p                | 2 |
| <i>circSFMBT2</i> | miR-34c-3p                | 2 |
| <i>circSFMBT2</i> | miR-3591-5p               | 1 |
| <i>circSFMBT2</i> | miR-3607-3p               | 3 |
| <i>circSFMBT2</i> | miR-3617-3p               | 1 |

|                   |                    |   |
|-------------------|--------------------|---|
| <i>circSFMBT2</i> | miR-362-5p/500b-5p | 3 |
| <i>circSFMBT2</i> | miR-3622a-5p       | 1 |
| <i>circSFMBT2</i> | miR-3622b-5p       | 1 |
| <i>circSFMBT2</i> | miR-363-5p/6745    | 2 |
| <i>circSFMBT2</i> | miR-3646           | 2 |
| <i>circSFMBT2</i> | miR-365-3p         | 1 |
| <i>circSFMBT2</i> | miR-3650           | 2 |
| <i>circSFMBT2</i> | miR-3651           | 1 |
| <i>circSFMBT2</i> | miR-3652/4430      | 1 |
| <i>circSFMBT2</i> | miR-3653-3p        | 3 |
| <i>circSFMBT2</i> | miR-3653-5p        | 2 |
| <i>circSFMBT2</i> | miR-3654           | 3 |
| <i>circSFMBT2</i> | miR-3658           | 1 |
| <i>circSFMBT2</i> | miR-3660/4526      | 1 |
| <i>circSFMBT2</i> | miR-3662           | 3 |
| <i>circSFMBT2</i> | miR-3667-3p        | 1 |
| <i>circSFMBT2</i> | miR-3667-5p        | 1 |
| <i>circSFMBT2</i> | miR-3668           | 1 |
| <i>circSFMBT2</i> | miR-367-5p         | 1 |
| <i>circSFMBT2</i> | miR-3670           | 1 |
| <i>circSFMBT2</i> | miR-3671           | 1 |
| <i>circSFMBT2</i> | miR-3672/6864-3p   | 1 |
| <i>circSFMBT2</i> | miR-3675-3p        | 2 |
| <i>circSFMBT2</i> | miR-3678-3p        | 2 |
| <i>circSFMBT2</i> | miR-3679-3p        | 1 |
| <i>circSFMBT2</i> | miR-3680-3p        | 1 |
| <i>circSFMBT2</i> | miR-3682-3p        | 2 |
| <i>circSFMBT2</i> | miR-3684           | 2 |
| <i>circSFMBT2</i> | miR-3685           | 2 |
| <i>circSFMBT2</i> | miR-3686           | 2 |
| <i>circSFMBT2</i> | miR-3688-3p        | 4 |
| <i>circSFMBT2</i> | miR-369-5p         | 1 |
| <i>circSFMBT2</i> | miR-3691-3p        | 1 |
| <i>circSFMBT2</i> | miR-3691-5p        | 1 |
| <i>circSFMBT2</i> | miR-3692-5p        | 1 |
| <i>circSFMBT2</i> | miR-3714           | 1 |
| <i>circSFMBT2</i> | miR-374-5p         | 1 |
| <i>circSFMBT2</i> | miR-374b-3p        | 1 |

|                   |                     |   |
|-------------------|---------------------|---|
| <i>circSFMBT2</i> | miR-374c-3p         | 1 |
| <i>circSFMBT2</i> | miR-375             | 5 |
| <i>circSFMBT2</i> | miR-376-3p          | 2 |
| <i>circSFMBT2</i> | miR-376b-5p/376c-5p | 2 |
| <i>circSFMBT2</i> | miR-376c-3p         | 2 |
| <i>circSFMBT2</i> | miR-378-3p          | 2 |
| <i>circSFMBT2</i> | miR-378a-5p         | 1 |
| <i>circSFMBT2</i> | miR-378j/6839-5p    | 1 |
| <i>circSFMBT2</i> | miR-379-5p          | 1 |
| <i>circSFMBT2</i> | miR-380-3p          | 1 |
| <i>circSFMBT2</i> | miR-381-5p          | 1 |
| <i>circSFMBT2</i> | miR-383-3p          | 3 |
| <i>circSFMBT2</i> | miR-383-5p.2        | 2 |
| <i>circSFMBT2</i> | miR-384             | 2 |
| <i>circSFMBT2</i> | miR-3908            | 2 |
| <i>circSFMBT2</i> | miR-3910            | 1 |
| <i>circSFMBT2</i> | miR-3920            | 2 |
| <i>circSFMBT2</i> | miR-3921/4653-5p    | 2 |
| <i>circSFMBT2</i> | miR-3924            | 3 |
| <i>circSFMBT2</i> | miR-3925-5p         | 4 |
| <i>circSFMBT2</i> | miR-3928-3p         | 2 |
| <i>circSFMBT2</i> | miR-3934-3p         | 1 |
| <i>circSFMBT2</i> | miR-3934-5p         | 1 |
| <i>circSFMBT2</i> | miR-3938            | 1 |
| <i>circSFMBT2</i> | miR-3941            | 3 |
| <i>circSFMBT2</i> | miR-3942-5p         | 2 |
| <i>circSFMBT2</i> | miR-3945            | 1 |
| <i>circSFMBT2</i> | miR-3973            | 1 |
| <i>circSFMBT2</i> | miR-3977            | 1 |
| <i>circSFMBT2</i> | miR-3978            | 4 |
| <i>circSFMBT2</i> | miR-409-3p          | 2 |
| <i>circSFMBT2</i> | miR-410-3p          | 1 |
| <i>circSFMBT2</i> | miR-411-3p          | 3 |
| <i>circSFMBT2</i> | miR-411-5p.1        | 2 |
| <i>circSFMBT2</i> | miR-411-5p.2        | 1 |
| <i>circSFMBT2</i> | miR-425-5p          | 1 |
| <i>circSFMBT2</i> | miR-4253/6862-5p    | 1 |
| <i>circSFMBT2</i> | miR-4255            | 1 |

|                   |                                    |   |
|-------------------|------------------------------------|---|
| <i>circSFMBT2</i> | miR-4258                           | 2 |
| <i>circSFMBT2</i> | miR-4259                           | 3 |
| <i>circSFMBT2</i> | miR-4260                           | 1 |
| <i>circSFMBT2</i> | miR-4261                           | 1 |
| <i>circSFMBT2</i> | miR-4263                           | 1 |
| <i>circSFMBT2</i> | miR-4265/4296/4322                 | 2 |
| <i>circSFMBT2</i> | miR-4267                           | 1 |
| <i>circSFMBT2</i> | miR-4269/6715b-5p                  | 1 |
| <i>circSFMBT2</i> | miR-4271/4725-3p/6780b-5p          | 1 |
| <i>circSFMBT2</i> | miR-4273/7156-5p                   | 1 |
| <i>circSFMBT2</i> | miR-4275                           | 1 |
| <i>circSFMBT2</i> | miR-4276                           | 1 |
| <i>circSFMBT2</i> | miR-4279                           | 1 |
| <i>circSFMBT2</i> | miR-4280                           | 2 |
| <i>circSFMBT2</i> | miR-4282                           | 1 |
| <i>circSFMBT2</i> | miR-4291                           | 3 |
| <i>circSFMBT2</i> | miR-4294                           | 1 |
| <i>circSFMBT2</i> | miR-4297/5581-5p                   | 2 |
| <i>circSFMBT2</i> | miR-4302                           | 1 |
| <i>circSFMBT2</i> | miR-4307                           | 1 |
| <i>circSFMBT2</i> | miR-4311                           | 2 |
| <i>circSFMBT2</i> | miR-4314                           | 2 |
| <i>circSFMBT2</i> | miR-432-3p                         | 2 |
| <i>circSFMBT2</i> | miR-432-5p                         | 3 |
| <i>circSFMBT2</i> | miR-4320                           | 1 |
| <i>circSFMBT2</i> | miR-4321                           | 1 |
| <i>circSFMBT2</i> | miR-4326                           | 1 |
| <i>circSFMBT2</i> | miR-4330                           | 1 |
| <i>circSFMBT2</i> | miR-4419a/4510/6127/6129/6130/6133 | 3 |
| <i>circSFMBT2</i> | miR-4422                           | 2 |
| <i>circSFMBT2</i> | miR-4425                           | 1 |
| <i>circSFMBT2</i> | miR-4426/4647/4662b                | 2 |
| <i>circSFMBT2</i> | miR-4427                           | 3 |
| <i>circSFMBT2</i> | miR-4443                           | 3 |
| <i>circSFMBT2</i> | miR-4445-5p                        | 1 |
| <i>circSFMBT2</i> | miR-4446-5p                        | 1 |
| <i>circSFMBT2</i> | miR-4447/4472                      | 1 |
| <i>circSFMBT2</i> | miR-4450                           | 1 |

|                   |                    |   |
|-------------------|--------------------|---|
| <i>circSFMBT2</i> | miR-4451           | 1 |
| <i>circSFMBT2</i> | miR-4452           | 3 |
| <i>circSFMBT2</i> | miR-4453/4538      | 1 |
| <i>circSFMBT2</i> | miR-4463           | 3 |
| <i>circSFMBT2</i> | miR-4470           | 1 |
| <i>circSFMBT2</i> | miR-4471/8059      | 1 |
| <i>circSFMBT2</i> | miR-4474-5p        | 4 |
| <i>circSFMBT2</i> | miR-4475           | 1 |
| <i>circSFMBT2</i> | miR-448            | 1 |
| <i>circSFMBT2</i> | miR-4480           | 1 |
| <i>circSFMBT2</i> | miR-4482-3p        | 2 |
| <i>circSFMBT2</i> | miR-4484           | 2 |
| <i>circSFMBT2</i> | miR-4494           | 4 |
| <i>circSFMBT2</i> | miR-4496           | 2 |
| <i>circSFMBT2</i> | miR-4499           | 3 |
| <i>circSFMBT2</i> | miR-449c-3p        | 1 |
| <i>circSFMBT2</i> | miR-450-5p         | 1 |
| <i>circSFMBT2</i> | miR-4501           | 2 |
| <i>circSFMBT2</i> | miR-4502           | 1 |
| <i>circSFMBT2</i> | miR-4503           | 2 |
| <i>circSFMBT2</i> | miR-4504           | 1 |
| <i>circSFMBT2</i> | miR-4505/5787      | 1 |
| <i>circSFMBT2</i> | miR-4506           | 1 |
| <i>circSFMBT2</i> | miR-450a-1-3p      | 1 |
| <i>circSFMBT2</i> | miR-450a-2-3p      | 1 |
| <i>circSFMBT2</i> | miR-450b-3p/769-3p | 2 |
| <i>circSFMBT2</i> | miR-450b-5p        | 1 |
| <i>circSFMBT2</i> | miR-451            | 1 |
| <i>circSFMBT2</i> | miR-4513/6855-3p   | 1 |
| <i>circSFMBT2</i> | miR-4514/4692      | 1 |
| <i>circSFMBT2</i> | miR-4517           | 2 |
| <i>circSFMBT2</i> | miR-452-3p         | 1 |
| <i>circSFMBT2</i> | miR-452-5p/892-3p  | 3 |
| <i>circSFMBT2</i> | miR-4520-3p        | 2 |
| <i>circSFMBT2</i> | miR-4520-5p        | 1 |
| <i>circSFMBT2</i> | miR-4524a-3p       | 2 |
| <i>circSFMBT2</i> | miR-4524b-3p       | 1 |
| <i>circSFMBT2</i> | miR-4533           | 3 |

|                   |                       |   |
|-------------------|-----------------------|---|
| <i>circSFMBT2</i> | miR-4535              | 1 |
| <i>circSFMBT2</i> | miR-4539              | 2 |
| <i>circSFMBT2</i> | miR-455-5p            | 2 |
| <i>circSFMBT2</i> | miR-4638-3p           | 2 |
| <i>circSFMBT2</i> | miR-4639-5p           | 1 |
| <i>circSFMBT2</i> | miR-4642              | 1 |
| <i>circSFMBT2</i> | miR-4645-3p           | 2 |
| <i>circSFMBT2</i> | miR-4645-5p/4673      | 1 |
| <i>circSFMBT2</i> | miR-4646-3p           | 1 |
| <i>circSFMBT2</i> | miR-4648              | 2 |
| <i>circSFMBT2</i> | miR-4650-3p           | 1 |
| <i>circSFMBT2</i> | miR-4652-3p           | 1 |
| <i>circSFMBT2</i> | miR-4654/4769-5p      | 2 |
| <i>circSFMBT2</i> | miR-4656              | 1 |
| <i>circSFMBT2</i> | miR-4659a-3p/4659b-3p | 1 |
| <i>circSFMBT2</i> | miR-4659a-5p/4659b-5p | 2 |
| <i>circSFMBT2</i> | miR-4661-3p           | 1 |
| <i>circSFMBT2</i> | miR-4662-5p           | 1 |
| <i>circSFMBT2</i> | miR-4666a-5p          | 1 |
| <i>circSFMBT2</i> | miR-4668-3p           | 2 |
| <i>circSFMBT2</i> | miR-4668-5p           | 3 |
| <i>circSFMBT2</i> | miR-4672              | 3 |
| <i>circSFMBT2</i> | miR-4674              | 1 |
| <i>circSFMBT2</i> | miR-4675/4741         | 1 |
| <i>circSFMBT2</i> | miR-4677-5p           | 1 |
| <i>circSFMBT2</i> | miR-4680-3p           | 3 |
| <i>circSFMBT2</i> | miR-4680-5p           | 1 |
| <i>circSFMBT2</i> | miR-4687-5p           | 1 |
| <i>circSFMBT2</i> | miR-4691-5p/6792-3p   | 1 |
| <i>circSFMBT2</i> | miR-4693-5p           | 2 |
| <i>circSFMBT2</i> | miR-4694-3p           | 3 |
| <i>circSFMBT2</i> | miR-4698              | 1 |
| <i>circSFMBT2</i> | miR-4699-5p           | 3 |
| <i>circSFMBT2</i> | miR-4700-3p           | 1 |
| <i>circSFMBT2</i> | miR-4705              | 4 |
| <i>circSFMBT2</i> | miR-4708-3p           | 1 |
| <i>circSFMBT2</i> | miR-4709-3p           | 3 |
| <i>circSFMBT2</i> | miR-4710              | 1 |



|                   |                     |   |
|-------------------|---------------------|---|
| <i>circSFMBT2</i> | miR-4712-3p         | 2 |
| <i>circSFMBT2</i> | miR-4714-3p         | 1 |
| <i>circSFMBT2</i> | miR-4715-5p         | 3 |
| <i>circSFMBT2</i> | miR-4720-3p         | 1 |
| <i>circSFMBT2</i> | miR-4724-3p         | 1 |
| <i>circSFMBT2</i> | miR-4724-5p         | 1 |
| <i>circSFMBT2</i> | miR-4728-3p         | 2 |
| <i>circSFMBT2</i> | miR-4731-5p         | 1 |
| <i>circSFMBT2</i> | miR-4732-5p         | 1 |
| <i>circSFMBT2</i> | miR-4735-5p         | 1 |
| <i>circSFMBT2</i> | miR-4737            | 2 |
| <i>circSFMBT2</i> | miR-4739            | 1 |
| <i>circSFMBT2</i> | miR-4742-3p         | 1 |
| <i>circSFMBT2</i> | miR-4742-5p         | 1 |
| <i>circSFMBT2</i> | miR-4743-3p         | 1 |
| <i>circSFMBT2</i> | miR-4747-3p         | 1 |
| <i>circSFMBT2</i> | miR-4747-5p/5196-5p | 2 |
| <i>circSFMBT2</i> | miR-4751            | 3 |
| <i>circSFMBT2</i> | miR-4752            | 1 |
| <i>circSFMBT2</i> | miR-4753-3p         | 3 |
| <i>circSFMBT2</i> | miR-4753-5p         | 1 |
| <i>circSFMBT2</i> | miR-4755-5p/5006-3p | 1 |
| <i>circSFMBT2</i> | miR-4762-5p         | 2 |
| <i>circSFMBT2</i> | miR-4764-5p         | 2 |
| <i>circSFMBT2</i> | miR-4765            | 1 |
| <i>circSFMBT2</i> | miR-4766-5p         | 1 |
| <i>circSFMBT2</i> | miR-4768-5p/6833-3p | 2 |
| <i>circSFMBT2</i> | miR-4769-3p/6817-5p | 2 |
| <i>circSFMBT2</i> | miR-4771            | 1 |
| <i>circSFMBT2</i> | miR-4774-3p         | 2 |
| <i>circSFMBT2</i> | miR-4775            | 4 |
| <i>circSFMBT2</i> | miR-4776-3p         | 1 |
| <i>circSFMBT2</i> | miR-4776-5p         | 1 |
| <i>circSFMBT2</i> | miR-4778-3p         | 1 |
| <i>circSFMBT2</i> | miR-4778-5p         | 1 |
| <i>circSFMBT2</i> | miR-4781-3p         | 2 |
| <i>circSFMBT2</i> | miR-4782-5p/5706    | 1 |
| <i>circSFMBT2</i> | miR-4788            | 1 |

|                   |                             |   |
|-------------------|-----------------------------|---|
| <i>circSFMBT2</i> | miR-4789-5p                 | 2 |
| <i>circSFMBT2</i> | miR-4790-3p                 | 4 |
| <i>circSFMBT2</i> | miR-4792                    | 1 |
| <i>circSFMBT2</i> | miR-4793-5p                 | 1 |
| <i>circSFMBT2</i> | miR-4795-3p                 | 1 |
| <i>circSFMBT2</i> | miR-4795-5p                 | 1 |
| <i>circSFMBT2</i> | miR-4799-5p                 | 1 |
| <i>circSFMBT2</i> | miR-4802-3p                 | 1 |
| <i>circSFMBT2</i> | miR-4802-5p                 | 1 |
| <i>circSFMBT2</i> | miR-4803                    | 3 |
| <i>circSFMBT2</i> | miR-4804-3p                 | 1 |
| <i>circSFMBT2</i> | miR-483-3p.1                | 1 |
| <i>circSFMBT2</i> | miR-483-3p.2                | 1 |
| <i>circSFMBT2</i> | miR-486-3p                  | 2 |
| <i>circSFMBT2</i> | miR-486-5p                  | 1 |
| <i>circSFMBT2</i> | miR-487-3p                  | 1 |
| <i>circSFMBT2</i> | miR-489-3p                  | 1 |
| <i>circSFMBT2</i> | miR-490-5p                  | 1 |
| <i>circSFMBT2</i> | miR-491-5p                  | 1 |
| <i>circSFMBT2</i> | miR-493-3p                  | 2 |
| <i>circSFMBT2</i> | miR-494-3p                  | 1 |
| <i>circSFMBT2</i> | miR-495-3p                  | 3 |
| <i>circSFMBT2</i> | miR-496.2                   | 1 |
| <i>circSFMBT2</i> | miR-498                     | 1 |
| <i>circSFMBT2</i> | miR-499a-5p                 | 1 |
| <i>circSFMBT2</i> | miR-499b-5p                 | 4 |
| <i>circSFMBT2</i> | miR-5000-5p                 | 1 |
| <i>circSFMBT2</i> | miR-5002-5p                 | 1 |
| <i>circSFMBT2</i> | miR-5003-3p                 | 1 |
| <i>circSFMBT2</i> | miR-5004-3p                 | 3 |
| <i>circSFMBT2</i> | miR-5004-5p                 | 3 |
| <i>circSFMBT2</i> | miR-5006-5p                 | 1 |
| <i>circSFMBT2</i> | miR-5007-3p                 | 2 |
| <i>circSFMBT2</i> | miR-5008-3p/6737-3p/7157-3p | 1 |
| <i>circSFMBT2</i> | miR-5009-3p                 | 1 |
| <i>circSFMBT2</i> | miR-500a-5p                 | 2 |
| <i>circSFMBT2</i> | miR-501-5p                  | 3 |
| <i>circSFMBT2</i> | miR-5010-3p                 | 1 |

|                   |                                         |   |
|-------------------|-----------------------------------------|---|
| <i>circSFMBT2</i> | miR-5011-5p                             | 2 |
| <i>circSFMBT2</i> | miR-505-5p                              | 1 |
| <i>circSFMBT2</i> | miR-507/557                             | 1 |
| <i>circSFMBT2</i> | miR-508-3p                              | 1 |
| <i>circSFMBT2</i> | miR-5088-3p                             | 2 |
| <i>circSFMBT2</i> | miR-5089-3p                             | 1 |
| <i>circSFMBT2</i> | miR-5089-5p                             | 2 |
| <i>circSFMBT2</i> | miR-509-3p                              | 1 |
| <i>circSFMBT2</i> | miR-5093                                | 2 |
| <i>circSFMBT2</i> | miR-510-3p                              | 3 |
| <i>circSFMBT2</i> | miR-511-3p                              | 1 |
| <i>circSFMBT2</i> | miR-511-5p                              | 1 |
| <i>circSFMBT2</i> | miR-513a-3p/513c-3p/3606-3p             | 4 |
| <i>circSFMBT2</i> | miR-513a-5p                             | 1 |
| <i>circSFMBT2</i> | miR-513b-3p                             | 1 |
| <i>circSFMBT2</i> | miR-514a-3p                             | 3 |
| <i>circSFMBT2</i> | miR-516a-3p/516b-3p/7162-5p             | 1 |
| <i>circSFMBT2</i> | miR-516b-5p                             | 1 |
| <i>circSFMBT2</i> | miR-5187-3p                             | 3 |
| <i>circSFMBT2</i> | miR-5187-5p                             | 1 |
| <i>circSFMBT2</i> | miR-5189-3p                             | 1 |
| <i>circSFMBT2</i> | miR-5190                                | 1 |
| <i>circSFMBT2</i> | miR-5191                                | 1 |
| <i>circSFMBT2</i> | miR-5193                                | 1 |
| <i>circSFMBT2</i> | miR-5196-3p                             | 1 |
| <i>circSFMBT2</i> | miR-5197-5p                             | 2 |
| <i>circSFMBT2</i> | miR-520g-3p                             | 1 |
| <i>circSFMBT2</i> | miR-522-3p                              | 3 |
| <i>circSFMBT2</i> | miR-524-5p                              | 1 |
| <i>circSFMBT2</i> | miR-526b-5p                             | 1 |
| <i>circSFMBT2</i> | miR-532-3p                              | 1 |
| <i>circSFMBT2</i> | miR-532-5p                              | 1 |
| <i>circSFMBT2</i> | miR-539-3p                              | 2 |
| <i>circSFMBT2</i> | miR-539-5p                              | 2 |
| <i>circSFMBT2</i> | miR-542-3p                              | 1 |
| <i>circSFMBT2</i> | miR-544a                                | 3 |
| <i>circSFMBT2</i> | miR-545-5p                              | 1 |
| <i>circSFMBT2</i> | miR-548ac/548bb-3p/548d-3p/548h-3p/548z |   |

|                   |                                                                    |   |
|-------------------|--------------------------------------------------------------------|---|
| <i>circSFMBT2</i> | miR-548an                                                          | 2 |
| <i>circSFMBT2</i> | miR-548ao-3p                                                       | 1 |
| <i>circSFMBT2</i> | miR-548ao-5p/548ax                                                 | 2 |
| <i>circSFMBT2</i> | miR-548aq-3p/548am-3p/548aj-3p/548ah-3p/548ae-3p/548j-3p/548x-3p   | 2 |
| <i>circSFMBT2</i> | miR-548at-5p                                                       | 1 |
| <i>circSFMBT2</i> | miR-548au-3p                                                       | 1 |
| <i>circSFMBT2</i> | miR-548av-3p                                                       | 2 |
| <i>circSFMBT2</i> | miR-548av-5p/548k/8054                                             | 2 |
| <i>circSFMBT2</i> | miR-548ay-5p/548au-5p/548as-5p/548ar-3p/548aq-5p/548ap-5p/548am-3p | 2 |
| <i>circSFMBT2</i> | miR-548az-3p/548ar-3p/548a-3p/548e-3p/548f-3p                      | 2 |
| <i>circSFMBT2</i> | miR-548az-5p/548t-5p                                               | 1 |
| <i>circSFMBT2</i> | miR-548c-3p                                                        | 3 |
| <i>circSFMBT2</i> | miR-548e-5p                                                        | 2 |
| <i>circSFMBT2</i> | miR-548l                                                           | 2 |
| <i>circSFMBT2</i> | miR-548n                                                           | 1 |
| <i>circSFMBT2</i> | miR-548p                                                           | 1 |
| <i>circSFMBT2</i> | miR-550a-3-5p/550a-5p/1271-3p                                      | 1 |
| <i>circSFMBT2</i> | miR-550b-2-5p                                                      | 1 |
| <i>circSFMBT2</i> | miR-551b-5p                                                        | 3 |
| <i>circSFMBT2</i> | miR-552-3p                                                         | 1 |
| <i>circSFMBT2</i> | miR-552-5p                                                         | 1 |
| <i>circSFMBT2</i> | miR-554                                                            | 1 |
| <i>circSFMBT2</i> | miR-5572                                                           | 1 |
| <i>circSFMBT2</i> | miR-5580-3p                                                        | 1 |
| <i>circSFMBT2</i> | miR-5580-5p                                                        | 1 |
| <i>circSFMBT2</i> | miR-5581-3p                                                        | 1 |
| <i>circSFMBT2</i> | miR-5582-3p                                                        | 1 |
| <i>circSFMBT2</i> | miR-5582-5p                                                        | 1 |
| <i>circSFMBT2</i> | miR-5583-3p                                                        | 2 |
| <i>circSFMBT2</i> | miR-5584-5p                                                        | 3 |
| <i>circSFMBT2</i> | miR-5585-3p                                                        | 3 |
| <i>circSFMBT2</i> | miR-5585-5p                                                        | 2 |
| <i>circSFMBT2</i> | miR-5587-5p                                                        | 1 |
| <i>circSFMBT2</i> | miR-5589-5p                                                        | 1 |
| <i>circSFMBT2</i> | miR-5590-5p                                                        | 2 |
| <i>circSFMBT2</i> | miR-561-3p                                                         | 1 |
| <i>circSFMBT2</i> | miR-562                                                            | 1 |
| <i>circSFMBT2</i> | miR-567                                                            | 3 |

|                   |                  |   |
|-------------------|------------------|---|
| <i>circSFMBT2</i> | miR-568          | 2 |
| <i>circSFMBT2</i> | miR-5680         | 3 |
| <i>circSFMBT2</i> | miR-5681a        | 3 |
| <i>circSFMBT2</i> | miR-5682         | 1 |
| <i>circSFMBT2</i> | miR-5687         | 3 |
| <i>circSFMBT2</i> | miR-5689         | 1 |
| <i>circSFMBT2</i> | miR-569          | 1 |
| <i>circSFMBT2</i> | miR-5691         | 2 |
| <i>circSFMBT2</i> | miR-5692a        | 3 |
| <i>circSFMBT2</i> | miR-5693         | 2 |
| <i>circSFMBT2</i> | miR-5694         | 2 |
| <i>circSFMBT2</i> | miR-5697         | 2 |
| <i>circSFMBT2</i> | miR-570-3p       | 2 |
| <i>circSFMBT2</i> | miR-5701         | 1 |
| <i>circSFMBT2</i> | miR-5702         | 1 |
| <i>circSFMBT2</i> | miR-5707         | 1 |
| <i>circSFMBT2</i> | miR-576-5p       | 1 |
| <i>circSFMBT2</i> | miR-580-3p       | 2 |
| <i>circSFMBT2</i> | miR-580-5p       | 2 |
| <i>circSFMBT2</i> | miR-581          | 1 |
| <i>circSFMBT2</i> | miR-582-5p       | 2 |
| <i>circSFMBT2</i> | miR-583          | 2 |
| <i>circSFMBT2</i> | miR-584-3p       | 1 |
| <i>circSFMBT2</i> | miR-585-5p       | 1 |
| <i>circSFMBT2</i> | miR-587          | 2 |
| <i>circSFMBT2</i> | miR-589-3p       | 1 |
| <i>circSFMBT2</i> | miR-590-3p       | 6 |
| <i>circSFMBT2</i> | miR-593-3p       | 1 |
| <i>circSFMBT2</i> | miR-595          | 2 |
| <i>circSFMBT2</i> | miR-597-5p       | 2 |
| <i>circSFMBT2</i> | miR-598-3p       | 1 |
| <i>circSFMBT2</i> | miR-598-5p       | 1 |
| <i>circSFMBT2</i> | miR-603          | 3 |
| <i>circSFMBT2</i> | miR-605-5p       | 2 |
| <i>circSFMBT2</i> | miR-6068         | 1 |
| <i>circSFMBT2</i> | miR-607          | 1 |
| <i>circSFMBT2</i> | miR-6071         | 2 |
| <i>circSFMBT2</i> | miR-6072/6891-3p | 1 |

|                   |                    |   |
|-------------------|--------------------|---|
| <i>circSFMBT2</i> | miR-6074           | 1 |
| <i>circSFMBT2</i> | miR-6077           | 2 |
| <i>circSFMBT2</i> | miR-608/4651       | 2 |
| <i>circSFMBT2</i> | miR-6083           | 1 |
| <i>circSFMBT2</i> | miR-611/3131       | 2 |
| <i>circSFMBT2</i> | miR-6124           | 4 |
| <i>circSFMBT2</i> | miR-614            | 1 |
| <i>circSFMBT2</i> | miR-616-3p         | 2 |
| <i>circSFMBT2</i> | miR-618            | 1 |
| <i>circSFMBT2</i> | miR-619-5p/6506-5p | 2 |
| <i>circSFMBT2</i> | miR-623            | 3 |
| <i>circSFMBT2</i> | miR-624-5p         | 1 |
| <i>circSFMBT2</i> | miR-626/6876-3p    | 1 |
| <i>circSFMBT2</i> | miR-627-3p         | 3 |
| <i>circSFMBT2</i> | miR-629-5p         | 1 |
| <i>circSFMBT2</i> | miR-631/3661       | 2 |
| <i>circSFMBT2</i> | miR-632/4288       | 2 |
| <i>circSFMBT2</i> | miR-633            | 1 |
| <i>circSFMBT2</i> | miR-634            | 1 |
| <i>circSFMBT2</i> | miR-636            | 1 |
| <i>circSFMBT2</i> | miR-642-3p         | 1 |
| <i>circSFMBT2</i> | miR-642a-5p        | 1 |
| <i>circSFMBT2</i> | miR-643            | 1 |
| <i>circSFMBT2</i> | miR-647            | 1 |
| <i>circSFMBT2</i> | miR-6504-3p        | 2 |
| <i>circSFMBT2</i> | miR-6507-5p        | 1 |
| <i>circSFMBT2</i> | miR-6509-5p        | 1 |
| <i>circSFMBT2</i> | miR-651-3p         | 1 |
| <i>circSFMBT2</i> | miR-6513-3p        | 1 |
| <i>circSFMBT2</i> | miR-6513-5p        | 1 |
| <i>circSFMBT2</i> | miR-6514-3p        | 1 |
| <i>circSFMBT2</i> | miR-6514-5p        | 1 |
| <i>circSFMBT2</i> | miR-6515-3p        | 2 |
| <i>circSFMBT2</i> | miR-6515-5p        | 3 |
| <i>circSFMBT2</i> | miR-6516-3p        | 1 |
| <i>circSFMBT2</i> | miR-653-3p         | 1 |
| <i>circSFMBT2</i> | miR-654-3p         | 2 |
| <i>circSFMBT2</i> | miR-654-5p         | 1 |

|                   |                             |   |
|-------------------|-----------------------------|---|
| <i>circSFMBT2</i> | miR-656-3p                  | 1 |
| <i>circSFMBT2</i> | miR-659-3p                  | 2 |
| <i>circSFMBT2</i> | miR-660-3p                  | 1 |
| <i>circSFMBT2</i> | miR-664a-5p/4794            | 1 |
| <i>circSFMBT2</i> | miR-665                     | 3 |
| <i>circSFMBT2</i> | miR-670-3p                  | 2 |
| <i>circSFMBT2</i> | miR-6719-3p                 | 1 |
| <i>circSFMBT2</i> | miR-6728-3p                 | 1 |
| <i>circSFMBT2</i> | miR-6728-5p                 | 2 |
| <i>circSFMBT2</i> | miR-6730-3p                 | 1 |
| <i>circSFMBT2</i> | miR-6730-5p                 | 3 |
| <i>circSFMBT2</i> | miR-6732-3p                 | 1 |
| <i>circSFMBT2</i> | miR-6733-3p                 | 1 |
| <i>circSFMBT2</i> | miR-6734-3p                 | 1 |
| <i>circSFMBT2</i> | miR-6737-5p/6812-5p/6819-5p | 2 |
| <i>circSFMBT2</i> | miR-6738-3p                 | 3 |
| <i>circSFMBT2</i> | miR-6739-3p                 | 1 |
| <i>circSFMBT2</i> | miR-6740-3p                 | 1 |
| <i>circSFMBT2</i> | miR-6740-5p                 | 1 |
| <i>circSFMBT2</i> | miR-6742-5p                 | 1 |
| <i>circSFMBT2</i> | miR-6744-5p                 | 2 |
| <i>circSFMBT2</i> | miR-6747-5p                 | 2 |
| <i>circSFMBT2</i> | miR-6749-3p                 | 1 |
| <i>circSFMBT2</i> | miR-675-3p                  | 2 |
| <i>circSFMBT2</i> | miR-6750-5p/6822-5p         | 3 |
| <i>circSFMBT2</i> | miR-6756-5p/6766-5p         | 2 |
| <i>circSFMBT2</i> | miR-6757-3p                 | 2 |
| <i>circSFMBT2</i> | miR-6758-3p                 | 1 |
| <i>circSFMBT2</i> | miR-6759-5p                 | 2 |
| <i>circSFMBT2</i> | miR-676-3p                  | 2 |
| <i>circSFMBT2</i> | miR-676-5p                  | 1 |
| <i>circSFMBT2</i> | miR-6760-3p                 | 2 |
| <i>circSFMBT2</i> | miR-6760-5p                 | 1 |
| <i>circSFMBT2</i> | miR-6767-5p                 | 1 |
| <i>circSFMBT2</i> | miR-6768-3p                 | 2 |
| <i>circSFMBT2</i> | miR-6768-5p                 | 2 |
| <i>circSFMBT2</i> | miR-6769a-5p/6769b-5p       | 1 |
| <i>circSFMBT2</i> | miR-6770-5p                 | 2 |

|                   |                     |   |
|-------------------|---------------------|---|
| <i>circSFMBT2</i> | miR-6773-3p         | 2 |
| <i>circSFMBT2</i> | miR-6779-3p         | 1 |
| <i>circSFMBT2</i> | miR-6780a-3p        | 2 |
| <i>circSFMBT2</i> | miR-6782-3p         | 1 |
| <i>circSFMBT2</i> | miR-6782-5p         | 1 |
| <i>circSFMBT2</i> | miR-6783-5p         | 1 |
| <i>circSFMBT2</i> | miR-6788-3p         | 1 |
| <i>circSFMBT2</i> | miR-6790-3p         | 1 |
| <i>circSFMBT2</i> | miR-6793-3p         | 1 |
| <i>circSFMBT2</i> | miR-6794-3p         | 1 |
| <i>circSFMBT2</i> | miR-6796-5p         | 2 |
| <i>circSFMBT2</i> | miR-6799-5p         | 2 |
| <i>circSFMBT2</i> | miR-6800-5p         | 1 |
| <i>circSFMBT2</i> | miR-6801-3p/6810-3p | 1 |
| <i>circSFMBT2</i> | miR-6802-5p         | 1 |
| <i>circSFMBT2</i> | miR-6804-3p         | 1 |
| <i>circSFMBT2</i> | miR-6809-3p         | 2 |
| <i>circSFMBT2</i> | miR-6809-5p         | 1 |
| <i>circSFMBT2</i> | miR-6810-5p         | 1 |
| <i>circSFMBT2</i> | miR-6813-3p         | 1 |
| <i>circSFMBT2</i> | miR-6814-5p         | 1 |
| <i>circSFMBT2</i> | miR-6816-3p         | 1 |
| <i>circSFMBT2</i> | miR-6818-3p         | 1 |
| <i>circSFMBT2</i> | miR-6819-3p/6877-3p | 4 |
| <i>circSFMBT2</i> | miR-6821-3p         | 1 |
| <i>circSFMBT2</i> | miR-6821-5p         | 1 |
| <i>circSFMBT2</i> | miR-6826-3p         | 1 |
| <i>circSFMBT2</i> | miR-6827-5p         | 2 |
| <i>circSFMBT2</i> | miR-6828-3p         | 2 |
| <i>circSFMBT2</i> | miR-6829-5p         | 1 |
| <i>circSFMBT2</i> | miR-6830-5p         | 2 |
| <i>circSFMBT2</i> | miR-6831-3p         | 1 |
| <i>circSFMBT2</i> | miR-6832-3p         | 3 |
| <i>circSFMBT2</i> | miR-6832-5p         | 1 |
| <i>circSFMBT2</i> | miR-6833-5p         | 1 |
| <i>circSFMBT2</i> | miR-6842-3p         | 1 |
| <i>circSFMBT2</i> | miR-6844            | 1 |
| <i>circSFMBT2</i> | miR-6845-3p         | 1 |



|                   |                           |   |
|-------------------|---------------------------|---|
| <i>circSFMBT2</i> | miR-6851-3p               | 1 |
| <i>circSFMBT2</i> | miR-6853-3p               | 2 |
| <i>circSFMBT2</i> | miR-6854-5p               | 1 |
| <i>circSFMBT2</i> | miR-6857-3p               | 1 |
| <i>circSFMBT2</i> | miR-6857-5p               | 1 |
| <i>circSFMBT2</i> | miR-6865-3p               | 1 |
| <i>circSFMBT2</i> | miR-6868-3p               | 1 |
| <i>circSFMBT2</i> | miR-6871-3p               | 4 |
| <i>circSFMBT2</i> | miR-6872-3p               | 1 |
| <i>circSFMBT2</i> | miR-6873-3p               | 1 |
| <i>circSFMBT2</i> | miR-6875-3p               | 1 |
| <i>circSFMBT2</i> | miR-6880-3p               | 1 |
| <i>circSFMBT2</i> | miR-6880-5p               | 1 |
| <i>circSFMBT2</i> | miR-6881-3p               | 2 |
| <i>circSFMBT2</i> | miR-6881-5p               | 1 |
| <i>circSFMBT2</i> | miR-6882-3p               | 1 |
| <i>circSFMBT2</i> | miR-6882-5p               | 1 |
| <i>circSFMBT2</i> | miR-6885-3p               | 2 |
| <i>circSFMBT2</i> | miR-6886-3p               | 1 |
| <i>circSFMBT2</i> | miR-6888-3p               | 1 |
| <i>circSFMBT2</i> | miR-6889-3p               | 1 |
| <i>circSFMBT2</i> | miR-6890-3p               | 1 |
| <i>circSFMBT2</i> | miR-6892-3p               | 1 |
| <i>circSFMBT2</i> | miR-6894-3p               | 1 |
| <i>circSFMBT2</i> | miR-6894-5p               | 3 |
| <i>circSFMBT2</i> | miR-6895-3p               | 1 |
| <i>circSFMBT2</i> | miR-7-3p                  | 2 |
| <i>circSFMBT2</i> | miR-7-5p                  | 2 |
| <i>circSFMBT2</i> | miR-7106-5p               | 2 |
| <i>circSFMBT2</i> | miR-7108-3p               | 2 |
| <i>circSFMBT2</i> | miR-7109-3p               | 2 |
| <i>circSFMBT2</i> | miR-711                   | 1 |
| <i>circSFMBT2</i> | miR-7111-3p               | 2 |
| <i>circSFMBT2</i> | miR-7150                  | 1 |
| <i>circSFMBT2</i> | miR-7154-3p               | 3 |
| <i>circSFMBT2</i> | miR-7159-3p               | 2 |
| <i>circSFMBT2</i> | miR-762/4492/4498/5001-5p | 1 |
| <i>circSFMBT2</i> | miR-765                   | 3 |

|                   |              |   |
|-------------------|--------------|---|
| <i>circSFMBT2</i> | miR-766-5p   | 3 |
| <i>circSFMBT2</i> | miR-7702     | 1 |
| <i>circSFMBT2</i> | miR-7847-3p  | 1 |
| <i>circSFMBT2</i> | miR-7852-3p  | 1 |
| <i>circSFMBT2</i> | miR-7855-5p  | 1 |
| <i>circSFMBT2</i> | miR-7856-5p  | 2 |
| <i>circSFMBT2</i> | miR-7977     | 1 |
| <i>circSFMBT2</i> | miR-802      | 1 |
| <i>circSFMBT2</i> | miR-8056     | 1 |
| <i>circSFMBT2</i> | miR-8063     | 1 |
| <i>circSFMBT2</i> | miR-8069     | 2 |
| <i>circSFMBT2</i> | miR-8070     | 3 |
| <i>circSFMBT2</i> | miR-8071     | 1 |
| <i>circSFMBT2</i> | miR-8075     | 1 |
| <i>circSFMBT2</i> | miR-8080     | 1 |
| <i>circSFMBT2</i> | miR-8485     | 3 |
| <i>circSFMBT2</i> | miR-875-3p   | 2 |
| <i>circSFMBT2</i> | miR-876-5p   | 2 |
| <i>circSFMBT2</i> | miR-885-5p   | 1 |
| <i>circSFMBT2</i> | miR-887-5p   | 1 |
| <i>circSFMBT2</i> | miR-889-3p   | 2 |
| <i>circSFMBT2</i> | miR-890      | 1 |
| <i>circSFMBT2</i> | miR-9-5p     | 1 |
| <i>circSFMBT2</i> | miR-922      | 1 |
| <i>circSFMBT2</i> | miR-92a-1-5p | 1 |
| <i>circSFMBT2</i> | miR-92a-2-5p | 1 |
| <i>circSFMBT2</i> | miR-93-3p    | 1 |
| <i>circSFMBT2</i> | miR-935      | 2 |
| <i>circSFMBT2</i> | miR-936      | 1 |
| <i>circSFMBT2</i> | miR-938      | 1 |
| <i>circSFMBT2</i> | miR-942-5p   | 2 |
| <i>circSFMBT2</i> | miR-943      | 3 |
| <i>circSFMBT2</i> | miR-944      | 3 |
| <i>circSFMBT2</i> | miR-95-5p    | 1 |
| <i>circSFMBT2</i> | miR-9500     | 3 |
| <i>circSFMBT2</i> | miR-96-3p    | 1 |
| <i>circSFMBT2</i> | miR-8068     | 1 |
| <i>circSFMBT2</i> | miR-6800-3p  | 1 |

|                   |                                     |   |
|-------------------|-------------------------------------|---|
| <i>circSFMBT2</i> | miR-100-3p                          | 1 |
| <i>circSFMBT2</i> | miR-103a-2-5p                       | 1 |
| <i>circSFMBT2</i> | miR-1178-3p                         | 1 |
| <i>circSFMBT2</i> | miR-1207-3p                         | 1 |
| <i>circSFMBT2</i> | miR-1262/4701-3p/6736-5p            | 1 |
| <i>circSFMBT2</i> | miR-1270                            | 1 |
| <i>circSFMBT2</i> | miR-1277-3p                         | 1 |
| <i>circSFMBT2</i> | miR-1307-3p                         | 1 |
| <i>circSFMBT2</i> | miR-132-5p                          | 1 |
| <i>circSFMBT2</i> | miR-136-3p                          | 1 |
| <i>circSFMBT2</i> | miR-17-5p/20-5p/93-5p/106-5p/519-3p | 1 |
| <i>circSFMBT2</i> | miR-185-5p                          | 1 |
| <i>circSFMBT2</i> | miR-1909-3p/6722-3p                 | 1 |
| <i>circSFMBT2</i> | miR-191-3p                          | 1 |
| <i>circSFMBT2</i> | miR-193-3p                          | 1 |
| <i>circSFMBT2</i> | miR-22-3p                           | 1 |
| <i>circSFMBT2</i> | miR-2355-5p                         | 1 |
| <i>circSFMBT2</i> | miR-24-3p                           | 2 |
| <i>circSFMBT2</i> | miR-28-5p/708-5p                    | 1 |
| <i>circSFMBT2</i> | miR-302-3p/372-3p/373-3p/520-3p     | 1 |
| <i>circSFMBT2</i> | miR-302c-3p.2/520-3p                | 1 |
| <i>circSFMBT2</i> | miR-3065-5p                         | 1 |
| <i>circSFMBT2</i> | miR-3119                            | 1 |
| <i>circSFMBT2</i> | miR-3124-5p                         | 1 |
| <i>circSFMBT2</i> | miR-3175                            | 2 |
| <i>circSFMBT2</i> | miR-3180-5p                         | 1 |
| <i>circSFMBT2</i> | miR-323a-5p                         | 1 |
| <i>circSFMBT2</i> | miR-3529-3p                         | 1 |
| <i>circSFMBT2</i> | miR-3614-5p                         | 1 |
| <i>circSFMBT2</i> | miR-3620-3p                         | 1 |
| <i>circSFMBT2</i> | miR-3663-3p                         | 1 |
| <i>circSFMBT2</i> | miR-3677-5p                         | 1 |
| <i>circSFMBT2</i> | miR-3687/4442                       | 2 |
| <i>circSFMBT2</i> | miR-3918                            | 1 |
| <i>circSFMBT2</i> | miR-3942-3p                         | 1 |
| <i>circSFMBT2</i> | miR-409-5p                          | 1 |
| <i>circSFMBT2</i> | miR-4272                            | 1 |
| <i>circSFMBT2</i> | miR-4284                            | 2 |

|                   |                          |   |
|-------------------|--------------------------|---|
| <i>circSFMBT2</i> | miR-4286                 | 1 |
| <i>circSFMBT2</i> | miR-4299                 | 1 |
| <i>circSFMBT2</i> | miR-4456                 | 1 |
| <i>circSFMBT2</i> | miR-4462                 | 1 |
| <i>circSFMBT2</i> | miR-4493                 | 1 |
| <i>circSFMBT2</i> | miR-4512                 | 1 |
| <i>circSFMBT2</i> | miR-4531                 | 1 |
| <i>circSFMBT2</i> | miR-4632-3p              | 1 |
| <i>circSFMBT2</i> | miR-4638-5p              | 1 |
| <i>circSFMBT2</i> | miR-4643                 | 1 |
| <i>circSFMBT2</i> | miR-4660                 | 1 |
| <i>circSFMBT2</i> | miR-4667-5p/4700-5p/8089 | 1 |
| <i>circSFMBT2</i> | miR-4691-3p              | 1 |
| <i>circSFMBT2</i> | miR-4694-5p              | 1 |
| <i>circSFMBT2</i> | miR-4696                 | 1 |
| <i>circSFMBT2</i> | miR-4711-3p              | 1 |
| <i>circSFMBT2</i> | miR-4725-5p              | 1 |
| <i>circSFMBT2</i> | miR-4734                 | 1 |
| <i>circSFMBT2</i> | miR-4761-5p              | 1 |
| <i>circSFMBT2</i> | miR-4767                 | 1 |
| <i>circSFMBT2</i> | miR-4780                 | 1 |
| <i>circSFMBT2</i> | miR-4789-3p              | 1 |
| <i>circSFMBT2</i> | miR-4796-3p              | 1 |
| <i>circSFMBT2</i> | miR-500a-3p              | 1 |
| <i>circSFMBT2</i> | miR-504-3p               | 1 |
| <i>circSFMBT2</i> | miR-512-3p               | 1 |
| <i>circSFMBT2</i> | miR-519-3p               | 1 |
| <i>circSFMBT2</i> | miR-5192                 | 1 |
| <i>circSFMBT2</i> | miR-5197-3p              | 1 |
| <i>circSFMBT2</i> | miR-548ah-5p/3609        | 1 |
| <i>circSFMBT2</i> | miR-548q                 | 1 |
| <i>circSFMBT2</i> | miR-5690                 | 1 |
| <i>circSFMBT2</i> | miR-575/4676-5p          | 1 |
| <i>circSFMBT2</i> | miR-605-3p               | 1 |
| <i>circSFMBT2</i> | miR-6081                 | 1 |
| <i>circSFMBT2</i> | miR-6132/6836-5p         | 1 |
| <i>circSFMBT2</i> | miR-624-3p               | 1 |
| <i>circSFMBT2</i> | miR-637                  | 1 |

|                   |                     |   |
|-------------------|---------------------|---|
| <i>circSFMBT2</i> | miR-6500-3p         | 1 |
| <i>circSFMBT2</i> | miR-6501-3p         | 1 |
| <i>circSFMBT2</i> | miR-6511-5p         | 1 |
| <i>circSFMBT2</i> | miR-652-5p          | 1 |
| <i>circSFMBT2</i> | miR-6715b-3p        | 1 |
| <i>circSFMBT2</i> | miR-6720-5p         | 1 |
| <i>circSFMBT2</i> | miR-6731-5p/8085    | 1 |
| <i>circSFMBT2</i> | miR-6741-3p         | 1 |
| <i>circSFMBT2</i> | miR-6741-5p         | 1 |
| <i>circSFMBT2</i> | miR-6767-3p         | 1 |
| <i>circSFMBT2</i> | miR-6772-3p         | 1 |
| <i>circSFMBT2</i> | miR-6776-5p         | 1 |
| <i>circSFMBT2</i> | miR-6777-5p/6889-5p | 1 |
| <i>circSFMBT2</i> | miR-6780b-3p        | 1 |
| <i>circSFMBT2</i> | miR-6781-5p         | 1 |
| <i>circSFMBT2</i> | miR-6785-3p         | 1 |
| <i>circSFMBT2</i> | miR-6787-3p         | 1 |
| <i>circSFMBT2</i> | miR-6802-3p         | 1 |
| <i>circSFMBT2</i> | miR-6808-3p         | 1 |
| <i>circSFMBT2</i> | miR-6825-5p         | 2 |
| <i>circSFMBT2</i> | miR-6847-3p         | 1 |
| <i>circSFMBT2</i> | miR-6849-3p         | 1 |
| <i>circSFMBT2</i> | miR-6858-3p         | 1 |
| <i>circSFMBT2</i> | miR-6861-5p         | 1 |
| <i>circSFMBT2</i> | miR-6870-3p         | 1 |
| <i>circSFMBT2</i> | miR-6877-5p         | 1 |
| <i>circSFMBT2</i> | miR-6878-5p         | 1 |
| <i>circSFMBT2</i> | miR-6886-5p         | 1 |
| <i>circSFMBT2</i> | miR-6895-5p         | 1 |
| <i>circSFMBT2</i> | miR-7106-3p         | 1 |
| <i>circSFMBT2</i> | miR-7112-5p         | 1 |
| <i>circSFMBT2</i> | miR-7155-5p         | 1 |
| <i>circSFMBT2</i> | miR-7158-5p         | 1 |
| <i>circSFMBT2</i> | miR-7160-3p         | 1 |
| <i>circSFMBT2</i> | miR-767-3p          | 1 |
| <i>circSFMBT2</i> | miR-7850-5p         | 1 |
| <i>circSFMBT2</i> | miR-7978            | 1 |
| <i>circSFMBT2</i> | miR-8064            | 1 |

|                   |                     |   |
|-------------------|---------------------|---|
| <i>circSFMBT2</i> | miR-876-3p          | 1 |
| <i>circSFMBT2</i> | miR-885-3p          | 1 |
| <i>circSFMBT2</i> | miR-891b            | 1 |
| <i>circSFMBT2</i> | miR-939-5p/1343-5p  | 2 |
| <i>circSFMBT2</i> | miR-941             | 1 |
| <i>circSH3GL3</i> | miR-101-3p.2        | 3 |
| <i>circSH3GL3</i> | miR-103a-2-5p       | 1 |
| <i>circSH3GL3</i> | miR-105-3p          | 1 |
| <i>circSH3GL3</i> | miR-105-5p          | 2 |
| <i>circSH3GL3</i> | miR-1178-3p         | 1 |
| <i>circSH3GL3</i> | miR-1179            | 3 |
| <i>circSH3GL3</i> | miR-1184            | 2 |
| <i>circSH3GL3</i> | miR-1199-3p         | 1 |
| <i>circSH3GL3</i> | miR-1205            | 2 |
| <i>circSH3GL3</i> | miR-1207-3p         | 1 |
| <i>circSH3GL3</i> | miR-1228-5p         | 1 |
| <i>circSH3GL3</i> | miR-1231            | 2 |
| <i>circSH3GL3</i> | miR-1234-3p/7107-5p | 1 |
| <i>circSH3GL3</i> | miR-1236-3p         | 1 |
| <i>circSH3GL3</i> | miR-124-5p          | 2 |
| <i>circSH3GL3</i> | miR-1243            | 3 |
| <i>circSH3GL3</i> | miR-1245b-5p        | 1 |
| <i>circSH3GL3</i> | miR-1246            | 1 |
| <i>circSH3GL3</i> | miR-1249-3p         | 1 |
| <i>circSH3GL3</i> | miR-1250-3p         | 1 |
| <i>circSH3GL3</i> | miR-1252-3p         | 1 |
| <i>circSH3GL3</i> | miR-1253            | 1 |
| <i>circSH3GL3</i> | miR-1255a/1255b-5p  | 1 |
| <i>circSH3GL3</i> | miR-1255b-2-3p      | 1 |
| <i>circSH3GL3</i> | miR-125a-3p         | 1 |
| <i>circSH3GL3</i> | miR-126-5p          | 1 |
| <i>circSH3GL3</i> | miR-1269            | 1 |
| <i>circSH3GL3</i> | miR-127-3p          | 2 |
| <i>circSH3GL3</i> | miR-127-5p          | 1 |
| <i>circSH3GL3</i> | miR-1270            | 2 |
| <i>circSH3GL3</i> | miR-1272            | 1 |
| <i>circSH3GL3</i> | miR-1273d           | 1 |
| <i>circSH3GL3</i> | miR-1273e           | 1 |

|                   |                                      |   |
|-------------------|--------------------------------------|---|
| <i>circSH3GL3</i> | miR-1273g-5p                         | 2 |
| <i>circSH3GL3</i> | miR-1273h-3p                         | 1 |
| <i>circSH3GL3</i> | miR-1276                             | 2 |
| <i>circSH3GL3</i> | miR-128-3p                           | 2 |
| <i>circSH3GL3</i> | miR-1285-5p                          | 1 |
| <i>circSH3GL3</i> | miR-1287-5p                          | 1 |
| <i>circSH3GL3</i> | miR-1288-3p                          | 1 |
| <i>circSH3GL3</i> | miR-1289                             | 2 |
| <i>circSH3GL3</i> | miR-129-5p                           | 2 |
| <i>circSH3GL3</i> | miR-1290                             | 3 |
| <i>circSH3GL3</i> | miR-1295b-5p/1912                    | 1 |
| <i>circSH3GL3</i> | miR-1301-3p                          | 2 |
| <i>circSH3GL3</i> | miR-1302/4298                        | 1 |
| <i>circSH3GL3</i> | miR-1303                             | 1 |
| <i>circSH3GL3</i> | miR-1304-3p                          | 1 |
| <i>circSH3GL3</i> | miR-1305                             | 2 |
| <i>circSH3GL3</i> | miR-130b-5p                          | 2 |
| <i>circSH3GL3</i> | miR-1322                             | 1 |
| <i>circSH3GL3</i> | miR-133a-3p.2/133b                   | 1 |
| <i>circSH3GL3</i> | miR-136-3p                           | 1 |
| <i>circSH3GL3</i> | miR-136-5p                           | 2 |
| <i>circSH3GL3</i> | miR-138-2-3p                         | 2 |
| <i>circSH3GL3</i> | miR-139-5p                           | 2 |
| <i>circSH3GL3</i> | miR-140-3p.1                         | 1 |
| <i>circSH3GL3</i> | miR-140-3p.2                         | 1 |
| <i>circSH3GL3</i> | miR-140-5p                           | 2 |
| <i>circSH3GL3</i> | miR-141-5p                           | 2 |
| <i>circSH3GL3</i> | miR-146a-3p                          | 2 |
| <i>circSH3GL3</i> | miR-148-3p/152-3p                    | 1 |
| <i>circSH3GL3</i> | miR-149-5p                           | 1 |
| <i>circSH3GL3</i> | miR-15-5p/16-5p/195-5p/424-5p/497-5p | 1 |
| <i>circSH3GL3</i> | miR-153-5p                           | 1 |
| <i>circSH3GL3</i> | miR-155-3p                           | 1 |
| <i>circSH3GL3</i> | miR-155-5p                           | 1 |
| <i>circSH3GL3</i> | miR-15b-3p                           | 1 |
| <i>circSH3GL3</i> | miR-17-3p                            | 2 |
| <i>circSH3GL3</i> | miR-18-5p                            | 3 |
| <i>circSH3GL3</i> | miR-181-3p/4420                      | 1 |

|                   |                     |   |
|-------------------|---------------------|---|
| <i>circSH3GL3</i> | miR-182-3p          | 1 |
| <i>circSH3GL3</i> | miR-183-3p          | 1 |
| <i>circSH3GL3</i> | miR-186-5p          | 2 |
| <i>circSH3GL3</i> | miR-18a-3p          | 2 |
| <i>circSH3GL3</i> | miR-190a-3p         | 1 |
| <i>circSH3GL3</i> | miR-1910-5p         | 2 |
| <i>circSH3GL3</i> | miR-1911-3p         | 1 |
| <i>circSH3GL3</i> | miR-1914-5p         | 2 |
| <i>circSH3GL3</i> | miR-192-3p          | 2 |
| <i>circSH3GL3</i> | miR-193-3p          | 1 |
| <i>circSH3GL3</i> | miR-194-3p          | 3 |
| <i>circSH3GL3</i> | miR-194-5p          | 2 |
| <i>circSH3GL3</i> | miR-196b-3p         | 1 |
| <i>circSH3GL3</i> | miR-197-3p          | 2 |
| <i>circSH3GL3</i> | miR-1972            | 1 |
| <i>circSH3GL3</i> | miR-1976            | 1 |
| <i>circSH3GL3</i> | miR-199-3p          | 1 |
| <i>circSH3GL3</i> | miR-200ab-5p        | 1 |
| <i>circSH3GL3</i> | miR-202-5p          | 5 |
| <i>circSH3GL3</i> | miR-203a-5p         | 2 |
| <i>circSH3GL3</i> | miR-203b-5p/6718-5p | 2 |
| <i>circSH3GL3</i> | miR-204-3p/4646-5p  | 1 |
| <i>circSH3GL3</i> | miR-205-3p          | 4 |
| <i>circSH3GL3</i> | miR-205-5p          | 2 |
| <i>circSH3GL3</i> | miR-208-5p          | 3 |
| <i>circSH3GL3</i> | miR-20b-3p          | 1 |
| <i>circSH3GL3</i> | miR-21-3p/3591-3p   | 1 |
| <i>circSH3GL3</i> | miR-21-5p/590-5p    | 2 |
| <i>circSH3GL3</i> | miR-2110            | 2 |
| <i>circSH3GL3</i> | miR-2113            | 1 |
| <i>circSH3GL3</i> | miR-2114-5p         | 2 |
| <i>circSH3GL3</i> | miR-2117            | 1 |
| <i>circSH3GL3</i> | miR-212-5p          | 1 |
| <i>circSH3GL3</i> | miR-216a-5p         | 2 |
| <i>circSH3GL3</i> | miR-216b-3p         | 1 |
| <i>circSH3GL3</i> | miR-216b-5p         | 2 |
| <i>circSH3GL3</i> | miR-218-1-3p        | 1 |
| <i>circSH3GL3</i> | miR-218-2-3p        | 1 |



|                   |                      |   |
|-------------------|----------------------|---|
| <i>circSH3GL3</i> | miR-218-5p           | 1 |
| <i>circSH3GL3</i> | miR-219b-5p          | 1 |
| <i>circSH3GL3</i> | miR-222-5p           | 1 |
| <i>circSH3GL3</i> | miR-223-5p           | 1 |
| <i>circSH3GL3</i> | miR-2276-3p          | 2 |
| <i>circSH3GL3</i> | miR-2276-5p          | 1 |
| <i>circSH3GL3</i> | miR-2277-3p          | 1 |
| <i>circSH3GL3</i> | miR-23-5p            | 1 |
| <i>circSH3GL3</i> | miR-2392             | 1 |
| <i>circSH3GL3</i> | miR-2682-3p/6781-3p  | 1 |
| <i>circSH3GL3</i> | miR-26b-3p           | 1 |
| <i>circSH3GL3</i> | miR-27-3p            | 2 |
| <i>circSH3GL3</i> | miR-28-3p            | 1 |
| <i>circSH3GL3</i> | miR-29-3p            | 1 |
| <i>circSH3GL3</i> | miR-297              | 1 |
| <i>circSH3GL3</i> | miR-298              | 2 |
| <i>circSH3GL3</i> | miR-29b-2-5p         | 2 |
| <i>circSH3GL3</i> | miR-29c-5p           | 1 |
| <i>circSH3GL3</i> | miR-30-3p            | 4 |
| <i>circSH3GL3</i> | miR-30-5p            | 1 |
| <i>circSH3GL3</i> | miR-302b-5p/302d-5p  | 1 |
| <i>circSH3GL3</i> | miR-302c-3p.2/520-3p | 1 |
| <i>circSH3GL3</i> | miR-302c-5p          | 1 |
| <i>circSH3GL3</i> | miR-3064-3p          | 2 |
| <i>circSH3GL3</i> | miR-3065-3p          | 2 |
| <i>circSH3GL3</i> | miR-3065-5p          | 2 |
| <i>circSH3GL3</i> | miR-3074-3p          | 1 |
| <i>circSH3GL3</i> | miR-31-3p            | 1 |
| <i>circSH3GL3</i> | miR-3117-3p          | 1 |
| <i>circSH3GL3</i> | miR-3117-5p          | 2 |
| <i>circSH3GL3</i> | miR-3119             | 2 |
| <i>circSH3GL3</i> | miR-3120-3p          | 1 |
| <i>circSH3GL3</i> | miR-3120-5p          | 1 |
| <i>circSH3GL3</i> | miR-3121-3p          | 1 |
| <i>circSH3GL3</i> | miR-3121-5p          | 3 |
| <i>circSH3GL3</i> | miR-3122/3913-5p     | 1 |
| <i>circSH3GL3</i> | miR-3123             | 2 |
| <i>circSH3GL3</i> | miR-3124-3p          | 1 |

|                   |                          |   |
|-------------------|--------------------------|---|
| <i>circSH3GL3</i> | miR-3125/3916/6859-5p    | 1 |
| <i>circSH3GL3</i> | miR-3129-3p/5583-5p      | 1 |
| <i>circSH3GL3</i> | miR-3130-5p/4482-5p      | 1 |
| <i>circSH3GL3</i> | miR-3133                 | 2 |
| <i>circSH3GL3</i> | miR-3135b                | 1 |
| <i>circSH3GL3</i> | miR-3137                 | 1 |
| <i>circSH3GL3</i> | miR-3138                 | 1 |
| <i>circSH3GL3</i> | miR-3140-3p              | 2 |
| <i>circSH3GL3</i> | miR-3143                 | 3 |
| <i>circSH3GL3</i> | miR-3144-3p              | 1 |
| <i>circSH3GL3</i> | miR-3144-5p              | 2 |
| <i>circSH3GL3</i> | miR-3145-3p              | 3 |
| <i>circSH3GL3</i> | miR-3145-5p              | 2 |
| <i>circSH3GL3</i> | miR-3148                 | 1 |
| <i>circSH3GL3</i> | miR-3149                 | 1 |
| <i>circSH3GL3</i> | miR-3150a-3p             | 2 |
| <i>circSH3GL3</i> | miR-3153/6733-5p/6739-5p | 1 |
| <i>circSH3GL3</i> | miR-3157-3p              | 2 |
| <i>circSH3GL3</i> | miR-3157-5p              | 2 |
| <i>circSH3GL3</i> | miR-3158-5p              | 2 |
| <i>circSH3GL3</i> | miR-3160-5p              | 1 |
| <i>circSH3GL3</i> | miR-3163                 | 2 |
| <i>circSH3GL3</i> | miR-3165                 | 3 |
| <i>circSH3GL3</i> | miR-3178                 | 1 |
| <i>circSH3GL3</i> | miR-3180-5p              | 1 |
| <i>circSH3GL3</i> | miR-3185                 | 1 |
| <i>circSH3GL3</i> | miR-3189-3p              | 1 |
| <i>circSH3GL3</i> | miR-3190-3p              | 1 |
| <i>circSH3GL3</i> | miR-3191-3p              | 2 |
| <i>circSH3GL3</i> | miR-3191-5p              | 1 |
| <i>circSH3GL3</i> | miR-3192-5p              | 1 |
| <i>circSH3GL3</i> | miR-3193                 | 1 |
| <i>circSH3GL3</i> | miR-3194-3p              | 3 |
| <i>circSH3GL3</i> | miR-3198/4309            | 2 |
| <i>circSH3GL3</i> | miR-320                  | 2 |
| <i>circSH3GL3</i> | miR-320e                 | 1 |
| <i>circSH3GL3</i> | miR-323-3p               | 2 |
| <i>circSH3GL3</i> | miR-323a-5p              | 1 |

|                   |                                   |   |
|-------------------|-----------------------------------|---|
| <i>circSH3GL3</i> | miR-324-3p/1913                   | 2 |
| <i>circSH3GL3</i> | miR-33-5p                         | 1 |
| <i>circSH3GL3</i> | miR-330-3p                        | 1 |
| <i>circSH3GL3</i> | miR-335-3p                        | 3 |
| <i>circSH3GL3</i> | miR-335-5p                        | 2 |
| <i>circSH3GL3</i> | miR-337-3p                        | 1 |
| <i>circSH3GL3</i> | miR-338-3p                        | 4 |
| <i>circSH3GL3</i> | miR-33a-3p                        | 1 |
| <i>circSH3GL3</i> | miR-340-3p/6827-3p                | 2 |
| <i>circSH3GL3</i> | miR-340-5p                        | 1 |
| <i>circSH3GL3</i> | miR-345-5p                        | 1 |
| <i>circSH3GL3</i> | miR-346                           | 2 |
| <i>circSH3GL3</i> | miR-3591-5p                       | 1 |
| <i>circSH3GL3</i> | miR-361-3p                        | 2 |
| <i>circSH3GL3</i> | miR-3613-3p                       | 1 |
| <i>circSH3GL3</i> | miR-3614-3p                       | 3 |
| <i>circSH3GL3</i> | miR-3620-3p                       | 1 |
| <i>circSH3GL3</i> | miR-3621                          | 2 |
| <i>circSH3GL3</i> | miR-3622a-3p/3622b-3p             | 2 |
| <i>circSH3GL3</i> | miR-3646                          | 1 |
| <i>circSH3GL3</i> | miR-3649                          | 1 |
| <i>circSH3GL3</i> | miR-3653-5p                       | 1 |
| <i>circSH3GL3</i> | miR-3654                          | 3 |
| <i>circSH3GL3</i> | miR-3655                          | 1 |
| <i>circSH3GL3</i> | miR-3656                          | 2 |
| <i>circSH3GL3</i> | miR-3667-3p                       | 5 |
| <i>circSH3GL3</i> | miR-3670                          | 3 |
| <i>circSH3GL3</i> | miR-3671                          | 2 |
| <i>circSH3GL3</i> | miR-3674                          | 1 |
| <i>circSH3GL3</i> | miR-3675-3p                       | 2 |
| <i>circSH3GL3</i> | miR-3677-5p                       | 1 |
| <i>circSH3GL3</i> | miR-3678-3p                       | 1 |
| <i>circSH3GL3</i> | miR-3679-3p                       | 2 |
| <i>circSH3GL3</i> | miR-3681-5p                       | 2 |
| <i>circSH3GL3</i> | miR-3682-3p                       | 1 |
| <i>circSH3GL3</i> | miR-3685                          | 5 |
| <i>circSH3GL3</i> | miR-3686                          | 2 |
| <i>circSH3GL3</i> | miR-3689a-5p/3689b-5p/3689e/3689f | 1 |

|                   |                           |   |
|-------------------|---------------------------|---|
| <i>circSH3GL3</i> | miR-369-3p                | 1 |
| <i>circSH3GL3</i> | miR-3690                  | 1 |
| <i>circSH3GL3</i> | miR-3691-3p               | 1 |
| <i>circSH3GL3</i> | miR-3691-5p               | 1 |
| <i>circSH3GL3</i> | miR-371-5p                | 1 |
| <i>circSH3GL3</i> | miR-3713                  | 2 |
| <i>circSH3GL3</i> | miR-371b-5p/373-5p/616-5p | 1 |
| <i>circSH3GL3</i> | miR-372-5p                | 1 |
| <i>circSH3GL3</i> | miR-374-5p                | 2 |
| <i>circSH3GL3</i> | miR-374c-3p               | 2 |
| <i>circSH3GL3</i> | miR-378j/6839-5p          | 4 |
| <i>circSH3GL3</i> | miR-382-3p                | 1 |
| <i>circSH3GL3</i> | miR-383-3p                | 2 |
| <i>circSH3GL3</i> | miR-384                   | 5 |
| <i>circSH3GL3</i> | miR-3914                  | 1 |
| <i>circSH3GL3</i> | miR-3917                  | 2 |
| <i>circSH3GL3</i> | miR-3920                  | 1 |
| <i>circSH3GL3</i> | miR-3924                  | 1 |
| <i>circSH3GL3</i> | miR-3925-3p               | 1 |
| <i>circSH3GL3</i> | miR-3925-5p               | 2 |
| <i>circSH3GL3</i> | miR-3928-3p               | 1 |
| <i>circSH3GL3</i> | miR-3928-5p/6806-3p       | 1 |
| <i>circSH3GL3</i> | miR-3934-3p               | 1 |
| <i>circSH3GL3</i> | miR-3934-5p               | 1 |
| <i>circSH3GL3</i> | miR-3937                  | 1 |
| <i>circSH3GL3</i> | miR-3940-5p/4507          | 1 |
| <i>circSH3GL3</i> | miR-3941                  | 1 |
| <i>circSH3GL3</i> | miR-3960/8072             | 1 |
| <i>circSH3GL3</i> | miR-3977                  | 1 |
| <i>circSH3GL3</i> | miR-3978                  | 1 |
| <i>circSH3GL3</i> | miR-412-3p/6754-3p        | 3 |
| <i>circSH3GL3</i> | miR-425-5p                | 1 |
| <i>circSH3GL3</i> | miR-4254                  | 1 |
| <i>circSH3GL3</i> | miR-4255                  | 2 |
| <i>circSH3GL3</i> | miR-4256                  | 1 |
| <i>circSH3GL3</i> | miR-4257                  | 1 |
| <i>circSH3GL3</i> | miR-4260                  | 1 |
| <i>circSH3GL3</i> | miR-4261                  | 1 |

|                   |                                              |   |
|-------------------|----------------------------------------------|---|
| <i>circSH3GL3</i> | miR-4263                                     | 1 |
| <i>circSH3GL3</i> | miR-4264                                     | 1 |
| <i>circSH3GL3</i> | miR-4267                                     | 1 |
| <i>circSH3GL3</i> | miR-4268                                     | 3 |
| <i>circSH3GL3</i> | miR-4273/7156-5p                             | 2 |
| <i>circSH3GL3</i> | miR-4276                                     | 4 |
| <i>circSH3GL3</i> | miR-4282                                     | 1 |
| <i>circSH3GL3</i> | miR-4289                                     | 1 |
| <i>circSH3GL3</i> | miR-4290                                     | 3 |
| <i>circSH3GL3</i> | miR-4291                                     | 5 |
| <i>circSH3GL3</i> | miR-4294                                     | 2 |
| <i>circSH3GL3</i> | miR-4297/5581-5p                             | 3 |
| <i>circSH3GL3</i> | miR-4302                                     | 2 |
| <i>circSH3GL3</i> | miR-4307                                     | 1 |
| <i>circSH3GL3</i> | miR-4310/7157-5p                             | 5 |
| <i>circSH3GL3</i> | miR-4311                                     | 2 |
| <i>circSH3GL3</i> | miR-4312                                     | 1 |
| <i>circSH3GL3</i> | miR-4314                                     | 1 |
| <i>circSH3GL3</i> | miR-4317                                     | 1 |
| <i>circSH3GL3</i> | miR-432-3p                                   | 1 |
| <i>circSH3GL3</i> | miR-4320                                     | 1 |
| <i>circSH3GL3</i> | miR-4326                                     | 2 |
| <i>circSH3GL3</i> | miR-4327                                     | 1 |
| <i>circSH3GL3</i> | miR-4427                                     | 1 |
| <i>circSH3GL3</i> | miR-4434/4516/5703                           | 1 |
| <i>circSH3GL3</i> | miR-4436b-3p/4632-5p/6735-5p/6879-5p/7843-5p | 1 |
| <i>circSH3GL3</i> | miR-4438                                     | 1 |
| <i>circSH3GL3</i> | miR-4448                                     | 3 |
| <i>circSH3GL3</i> | miR-4452                                     | 1 |
| <i>circSH3GL3</i> | miR-4453/4538                                | 2 |
| <i>circSH3GL3</i> | miR-4457                                     | 1 |
| <i>circSH3GL3</i> | miR-4460                                     | 1 |
| <i>circSH3GL3</i> | miR-4461                                     | 1 |
| <i>circSH3GL3</i> | miR-4464/4748                                | 1 |
| <i>circSH3GL3</i> | miR-4467                                     | 2 |
| <i>circSH3GL3</i> | miR-4474-5p                                  | 1 |
| <i>circSH3GL3</i> | miR-4475                                     | 1 |
| <i>circSH3GL3</i> | miR-4476/6876-5p                             | 1 |

|                   |                          |   |
|-------------------|--------------------------|---|
| <i>circSH3GL3</i> | miR-4482-3p              | 1 |
| <i>circSH3GL3</i> | miR-4490                 | 1 |
| <i>circSH3GL3</i> | miR-4496                 | 2 |
| <i>circSH3GL3</i> | miR-4501                 | 1 |
| <i>circSH3GL3</i> | miR-4502                 | 1 |
| <i>circSH3GL3</i> | miR-4503                 | 2 |
| <i>circSH3GL3</i> | miR-4504                 | 2 |
| <i>circSH3GL3</i> | miR-450a-1-3p            | 1 |
| <i>circSH3GL3</i> | miR-450a-2-3p            | 1 |
| <i>circSH3GL3</i> | miR-4515                 | 1 |
| <i>circSH3GL3</i> | miR-4522                 | 1 |
| <i>circSH3GL3</i> | miR-4528                 | 2 |
| <i>circSH3GL3</i> | miR-4530                 | 4 |
| <i>circSH3GL3</i> | miR-4531                 | 2 |
| <i>circSH3GL3</i> | miR-455-3p.1             | 2 |
| <i>circSH3GL3</i> | miR-4636                 | 1 |
| <i>circSH3GL3</i> | miR-4645-5p/4673         | 1 |
| <i>circSH3GL3</i> | miR-4650-5p              | 1 |
| <i>circSH3GL3</i> | miR-4652-5p              | 2 |
| <i>circSH3GL3</i> | miR-4655-3p              | 2 |
| <i>circSH3GL3</i> | miR-4659a-3p/4659b-3p    | 1 |
| <i>circSH3GL3</i> | miR-4660                 | 2 |
| <i>circSH3GL3</i> | miR-4662a-3p             | 2 |
| <i>circSH3GL3</i> | miR-4667-5p/4700-5p/8089 | 1 |
| <i>circSH3GL3</i> | miR-4668-3p              | 1 |
| <i>circSH3GL3</i> | miR-4668-5p              | 1 |
| <i>circSH3GL3</i> | miR-4672                 | 1 |
| <i>circSH3GL3</i> | miR-4677-3p              | 2 |
| <i>circSH3GL3</i> | miR-4677-5p              | 2 |
| <i>circSH3GL3</i> | miR-4679                 | 2 |
| <i>circSH3GL3</i> | miR-4680-3p              | 1 |
| <i>circSH3GL3</i> | miR-4680-5p              | 3 |
| <i>circSH3GL3</i> | miR-4691-3p              | 3 |
| <i>circSH3GL3</i> | miR-4693-3p              | 1 |
| <i>circSH3GL3</i> | miR-4695-3p              | 1 |
| <i>circSH3GL3</i> | miR-4699-3p              | 1 |
| <i>circSH3GL3</i> | miR-4699-5p              | 2 |
| <i>circSH3GL3</i> | miR-4700-3p              | 1 |

|                   |                     |   |
|-------------------|---------------------|---|
| <i>circSH3GL3</i> | miR-4704-3p         | 1 |
| <i>circSH3GL3</i> | miR-4709-3p         | 2 |
| <i>circSH3GL3</i> | miR-4714-3p         | 1 |
| <i>circSH3GL3</i> | miR-4716-5p         | 1 |
| <i>circSH3GL3</i> | miR-4719            | 2 |
| <i>circSH3GL3</i> | miR-4722-3p/6727-3p | 2 |
| <i>circSH3GL3</i> | miR-4724-3p         | 2 |
| <i>circSH3GL3</i> | miR-4724-5p         | 3 |
| <i>circSH3GL3</i> | miR-4727-3p         | 1 |
| <i>circSH3GL3</i> | miR-4728-3p         | 3 |
| <i>circSH3GL3</i> | miR-4729            | 1 |
| <i>circSH3GL3</i> | miR-4731-3p/4801    | 1 |
| <i>circSH3GL3</i> | miR-4734            | 2 |
| <i>circSH3GL3</i> | miR-4738-3p         | 1 |
| <i>circSH3GL3</i> | miR-4740-3p         | 2 |
| <i>circSH3GL3</i> | miR-4740-5p         | 1 |
| <i>circSH3GL3</i> | miR-4742-3p         | 1 |
| <i>circSH3GL3</i> | miR-4752            | 1 |
| <i>circSH3GL3</i> | miR-4753-3p         | 3 |
| <i>circSH3GL3</i> | miR-4760-3p         | 2 |
| <i>circSH3GL3</i> | miR-4761-3p         | 1 |
| <i>circSH3GL3</i> | miR-4762-3p         | 1 |
| <i>circSH3GL3</i> | miR-4766-5p         | 1 |
| <i>circSH3GL3</i> | miR-4768-5p/6833-3p | 1 |
| <i>circSH3GL3</i> | miR-4772-3p         | 2 |
| <i>circSH3GL3</i> | miR-4774-5p         | 1 |
| <i>circSH3GL3</i> | miR-4775            | 1 |
| <i>circSH3GL3</i> | miR-4776-3p         | 2 |
| <i>circSH3GL3</i> | miR-4778-3p         | 2 |
| <i>circSH3GL3</i> | miR-4795-5p         | 1 |
| <i>circSH3GL3</i> | miR-4796-3p         | 1 |
| <i>circSH3GL3</i> | miR-4797-3p         | 1 |
| <i>circSH3GL3</i> | miR-4797-5p         | 1 |
| <i>circSH3GL3</i> | miR-4799-5p         | 1 |
| <i>circSH3GL3</i> | miR-4800-5p         | 1 |
| <i>circSH3GL3</i> | miR-4802-3p         | 1 |
| <i>circSH3GL3</i> | miR-4803            | 1 |
| <i>circSH3GL3</i> | miR-483-3p.1        | 2 |

|                   |                                                                  |   |
|-------------------|------------------------------------------------------------------|---|
| <i>circSH3GL3</i> | miR-483-3p.2                                                     | 1 |
| <i>circSH3GL3</i> | miR-487-3p                                                       | 1 |
| <i>circSH3GL3</i> | miR-488-3p                                                       | 2 |
| <i>circSH3GL3</i> | miR-490-3p                                                       | 1 |
| <i>circSH3GL3</i> | miR-490-5p                                                       | 1 |
| <i>circSH3GL3</i> | miR-492                                                          | 1 |
| <i>circSH3GL3</i> | miR-4999-3p                                                      | 1 |
| <i>circSH3GL3</i> | miR-499a-3p/499b-3p                                              | 1 |
| <i>circSH3GL3</i> | miR-5002-5p                                                      | 2 |
| <i>circSH3GL3</i> | miR-5007-5p                                                      | 2 |
| <i>circSH3GL3</i> | miR-5009-3p                                                      | 1 |
| <i>circSH3GL3</i> | miR-5009-5p/8058                                                 | 1 |
| <i>circSH3GL3</i> | miR-5010-3p                                                      | 1 |
| <i>circSH3GL3</i> | miR-503-3p                                                       | 2 |
| <i>circSH3GL3</i> | miR-503-5p                                                       | 1 |
| <i>circSH3GL3</i> | miR-505-3p.1                                                     | 2 |
| <i>circSH3GL3</i> | miR-506-5p                                                       | 2 |
| <i>circSH3GL3</i> | miR-508-5p                                                       | 2 |
| <i>circSH3GL3</i> | miR-5087                                                         | 1 |
| <i>circSH3GL3</i> | miR-5092                                                         | 1 |
| <i>circSH3GL3</i> | miR-5093                                                         | 1 |
| <i>circSH3GL3</i> | miR-5094                                                         | 1 |
| <i>circSH3GL3</i> | miR-5096                                                         | 2 |
| <i>circSH3GL3</i> | miR-510-3p                                                       | 2 |
| <i>circSH3GL3</i> | miR-512-3p                                                       | 1 |
| <i>circSH3GL3</i> | miR-512-5p                                                       | 1 |
| <i>circSH3GL3</i> | miR-513a-3p/513c-3p/3606-3p                                      | 1 |
| <i>circSH3GL3</i> | miR-513a-5p                                                      | 2 |
| <i>circSH3GL3</i> | miR-513b-5p                                                      | 1 |
| <i>circSH3GL3</i> | miR-515-5p/519e-5p                                               | 1 |
| <i>circSH3GL3</i> | miR-5187-3p                                                      | 1 |
| <i>circSH3GL3</i> | miR-5189-3p                                                      | 2 |
| <i>circSH3GL3</i> | miR-539-5p                                                       | 1 |
| <i>circSH3GL3</i> | miR-542-3p                                                       | 2 |
| <i>circSH3GL3</i> | miR-544a                                                         | 2 |
| <i>circSH3GL3</i> | miR-548ac/548bb-3p/548d-3p/548h-3p/548z                          |   |
| <i>circSH3GL3</i> | miR-548ap-3p/548aa/548t-3p                                       | 1 |
| <i>circSH3GL3</i> | miR-548aq-3p/548am-3p/548aj-3p/548ah13p/548ae-3p/548j-3p/548x-3p |   |



|                   |                                               |   |
|-------------------|-----------------------------------------------|---|
| <i>circSH3GL3</i> | miR-548as-3p                                  | 1 |
| <i>circSH3GL3</i> | miR-548at-5p                                  | 2 |
| <i>circSH3GL3</i> | miR-548av-3p                                  | 1 |
| <i>circSH3GL3</i> | miR-548ay-3p/548at-3p                         | 1 |
| <i>circSH3GL3</i> | miR-548az-3p/548ar-3p/548a-3p/548e-3p/548f-3p | 1 |
| <i>circSH3GL3</i> | miR-548az-5p/548t-5p                          | 2 |
| <i>circSH3GL3</i> | miR-548c-3p                                   | 2 |
| <i>circSH3GL3</i> | miR-548g-3p                                   | 1 |
| <i>circSH3GL3</i> | miR-548m                                      | 3 |
| <i>circSH3GL3</i> | miR-548n                                      | 2 |
| <i>circSH3GL3</i> | miR-548p                                      | 1 |
| <i>circSH3GL3</i> | miR-5571-3p                                   | 2 |
| <i>circSH3GL3</i> | miR-5572                                      | 1 |
| <i>circSH3GL3</i> | miR-5579-3p                                   | 4 |
| <i>circSH3GL3</i> | miR-5580-3p                                   | 1 |
| <i>circSH3GL3</i> | miR-5581-3p                                   | 1 |
| <i>circSH3GL3</i> | miR-5582-3p                                   | 1 |
| <i>circSH3GL3</i> | miR-5584-5p                                   | 1 |
| <i>circSH3GL3</i> | miR-5586-5p                                   | 1 |
| <i>circSH3GL3</i> | miR-5587-5p                                   | 1 |
| <i>circSH3GL3</i> | miR-5588-3p                                   | 2 |
| <i>circSH3GL3</i> | miR-561-3p                                    | 2 |
| <i>circSH3GL3</i> | miR-561-5p                                    | 1 |
| <i>circSH3GL3</i> | miR-566                                       | 1 |
| <i>circSH3GL3</i> | miR-568                                       | 1 |
| <i>circSH3GL3</i> | miR-5680                                      | 2 |
| <i>circSH3GL3</i> | miR-5681a                                     | 1 |
| <i>circSH3GL3</i> | miR-5684                                      | 1 |
| <i>circSH3GL3</i> | miR-5687                                      | 1 |
| <i>circSH3GL3</i> | miR-5689                                      | 2 |
| <i>circSH3GL3</i> | miR-5691                                      | 2 |
| <i>circSH3GL3</i> | miR-5692a                                     | 1 |
| <i>circSH3GL3</i> | miR-5692bc                                    | 1 |
| <i>circSH3GL3</i> | miR-5693                                      | 3 |
| <i>circSH3GL3</i> | miR-5696                                      | 1 |
| <i>circSH3GL3</i> | miR-5697                                      | 1 |
| <i>circSH3GL3</i> | miR-5700                                      | 2 |
| <i>circSH3GL3</i> | miR-573/3616-5p                               | 1 |

|                   |                    |   |
|-------------------|--------------------|---|
| <i>circSH3GL3</i> | miR-576-5p         | 1 |
| <i>circSH3GL3</i> | miR-577            | 1 |
| <i>circSH3GL3</i> | miR-579-3p         | 1 |
| <i>circSH3GL3</i> | miR-582-5p         | 3 |
| <i>circSH3GL3</i> | miR-583            | 2 |
| <i>circSH3GL3</i> | miR-586            | 1 |
| <i>circSH3GL3</i> | miR-587            | 1 |
| <i>circSH3GL3</i> | miR-589-3p         | 1 |
| <i>circSH3GL3</i> | miR-590-3p         | 2 |
| <i>circSH3GL3</i> | miR-605-5p         | 1 |
| <i>circSH3GL3</i> | miR-606            | 1 |
| <i>circSH3GL3</i> | miR-607            | 2 |
| <i>circSH3GL3</i> | miR-6074           | 3 |
| <i>circSH3GL3</i> | miR-6077           | 1 |
| <i>circSH3GL3</i> | miR-6124           | 1 |
| <i>circSH3GL3</i> | miR-6134           | 1 |
| <i>circSH3GL3</i> | miR-615-3p         | 2 |
| <i>circSH3GL3</i> | miR-617            | 1 |
| <i>circSH3GL3</i> | miR-618            | 1 |
| <i>circSH3GL3</i> | miR-619-3p         | 2 |
| <i>circSH3GL3</i> | miR-619-5p/6506-5p | 1 |
| <i>circSH3GL3</i> | miR-624-3p         | 1 |
| <i>circSH3GL3</i> | miR-627-3p         | 1 |
| <i>circSH3GL3</i> | miR-628-5p         | 1 |
| <i>circSH3GL3</i> | miR-629-3p         | 1 |
| <i>circSH3GL3</i> | miR-630            | 2 |
| <i>circSH3GL3</i> | miR-632/4288       | 2 |
| <i>circSH3GL3</i> | miR-634            | 1 |
| <i>circSH3GL3</i> | miR-635/6774-5p    | 2 |
| <i>circSH3GL3</i> | miR-637            | 1 |
| <i>circSH3GL3</i> | miR-642-3p         | 3 |
| <i>circSH3GL3</i> | miR-643            | 2 |
| <i>circSH3GL3</i> | miR-646            | 1 |
| <i>circSH3GL3</i> | miR-647            | 3 |
| <i>circSH3GL3</i> | miR-649            | 1 |
| <i>circSH3GL3</i> | miR-6505-3p        | 1 |
| <i>circSH3GL3</i> | miR-6507-5p        | 2 |
| <i>circSH3GL3</i> | miR-6508-5p/8067   | 2 |

|                   |                     |   |
|-------------------|---------------------|---|
| <i>circSH3GL3</i> | miR-6509-5p         | 1 |
| <i>circSH3GL3</i> | miR-651-3p          | 2 |
| <i>circSH3GL3</i> | miR-6513-5p         | 1 |
| <i>circSH3GL3</i> | miR-6515-3p         | 1 |
| <i>circSH3GL3</i> | miR-653-3p          | 1 |
| <i>circSH3GL3</i> | miR-659-3p          | 1 |
| <i>circSH3GL3</i> | miR-659-5p          | 1 |
| <i>circSH3GL3</i> | miR-664a-3p         | 1 |
| <i>circSH3GL3</i> | miR-664a-5p/4794    | 1 |
| <i>circSH3GL3</i> | miR-668-3p          | 1 |
| <i>circSH3GL3</i> | miR-6716-5p         | 1 |
| <i>circSH3GL3</i> | miR-6720-5p         | 2 |
| <i>circSH3GL3</i> | miR-6721-5p         | 1 |
| <i>circSH3GL3</i> | miR-6728-3p         | 1 |
| <i>circSH3GL3</i> | miR-6730-5p         | 1 |
| <i>circSH3GL3</i> | miR-6733-3p         | 2 |
| <i>circSH3GL3</i> | miR-6734-3p         | 5 |
| <i>circSH3GL3</i> | miR-6736-3p         | 1 |
| <i>circSH3GL3</i> | miR-6738-3p         | 2 |
| <i>circSH3GL3</i> | miR-6739-3p         | 1 |
| <i>circSH3GL3</i> | miR-6740-3p         | 5 |
| <i>circSH3GL3</i> | miR-6742-3p         | 1 |
| <i>circSH3GL3</i> | miR-6744-5p         | 1 |
| <i>circSH3GL3</i> | miR-6747-3p         | 2 |
| <i>circSH3GL3</i> | miR-675-3p          | 1 |
| <i>circSH3GL3</i> | miR-6750-3p         | 2 |
| <i>circSH3GL3</i> | miR-6750-5p/6822-5p | 1 |
| <i>circSH3GL3</i> | miR-6757-3p         | 2 |
| <i>circSH3GL3</i> | miR-6758-5p/6856-5p | 1 |
| <i>circSH3GL3</i> | miR-6759-3p         | 1 |
| <i>circSH3GL3</i> | miR-676-5p          | 4 |
| <i>circSH3GL3</i> | miR-6763-3p         | 2 |
| <i>circSH3GL3</i> | miR-6765-3p         | 2 |
| <i>circSH3GL3</i> | miR-6767-5p         | 1 |
| <i>circSH3GL3</i> | miR-6768-5p         | 4 |
| <i>circSH3GL3</i> | miR-6770-5p         | 1 |
| <i>circSH3GL3</i> | miR-6771-3p         | 1 |
| <i>circSH3GL3</i> | miR-6782-3p         | 3 |

|                   |                     |   |
|-------------------|---------------------|---|
| <i>circSH3GL3</i> | miR-6787-3p         | 2 |
| <i>circSH3GL3</i> | miR-6789-3p         | 1 |
| <i>circSH3GL3</i> | miR-6792-5p         | 1 |
| <i>circSH3GL3</i> | miR-6803-3p         | 2 |
| <i>circSH3GL3</i> | miR-6808-3p         | 2 |
| <i>circSH3GL3</i> | miR-6809-3p         | 1 |
| <i>circSH3GL3</i> | miR-6810-5p         | 2 |
| <i>circSH3GL3</i> | miR-6815-5p/6865-5p | 4 |
| <i>circSH3GL3</i> | miR-6817-3p         | 1 |
| <i>circSH3GL3</i> | miR-6826-5p         | 1 |
| <i>circSH3GL3</i> | miR-6827-5p         | 1 |
| <i>circSH3GL3</i> | miR-6830-3p         | 1 |
| <i>circSH3GL3</i> | miR-6833-5p         | 1 |
| <i>circSH3GL3</i> | miR-6836-3p         | 1 |
| <i>circSH3GL3</i> | miR-6837-3p         | 3 |
| <i>circSH3GL3</i> | miR-6839-3p         | 1 |
| <i>circSH3GL3</i> | miR-6842-3p         | 3 |
| <i>circSH3GL3</i> | miR-6843-3p/6848-3p | 2 |
| <i>circSH3GL3</i> | miR-6847-5p         | 1 |
| <i>circSH3GL3</i> | miR-6852-5p         | 1 |
| <i>circSH3GL3</i> | miR-6854-5p         | 1 |
| <i>circSH3GL3</i> | miR-6856-3p         | 1 |
| <i>circSH3GL3</i> | miR-6857-5p         | 2 |
| <i>circSH3GL3</i> | miR-6861-3p         | 1 |
| <i>circSH3GL3</i> | miR-6868-3p         | 3 |
| <i>circSH3GL3</i> | miR-6870-3p         | 2 |
| <i>circSH3GL3</i> | miR-6871-3p         | 1 |
| <i>circSH3GL3</i> | miR-6875-3p         | 1 |
| <i>circSH3GL3</i> | miR-6880-5p         | 3 |
| <i>circSH3GL3</i> | miR-6882-3p         | 1 |
| <i>circSH3GL3</i> | miR-6885-3p         | 2 |
| <i>circSH3GL3</i> | miR-6888-3p         | 1 |
| <i>circSH3GL3</i> | miR-6892-3p         | 1 |
| <i>circSH3GL3</i> | miR-7-3p            | 1 |
| <i>circSH3GL3</i> | miR-7-5p            | 1 |
| <i>circSH3GL3</i> | miR-7109-3p         | 2 |
| <i>circSH3GL3</i> | miR-7110-3p         | 1 |
| <i>circSH3GL3</i> | miR-7114-5p         | 3 |

|                   |              |   |
|-------------------|--------------|---|
| <i>circSH3GL3</i> | miR-7155-5p  | 1 |
| <i>circSH3GL3</i> | miR-7156-3p  | 2 |
| <i>circSH3GL3</i> | miR-7159-3p  | 1 |
| <i>circSH3GL3</i> | miR-744-3p   | 1 |
| <i>circSH3GL3</i> | miR-764      | 1 |
| <i>circSH3GL3</i> | miR-766-3p   | 1 |
| <i>circSH3GL3</i> | miR-767-5p   | 1 |
| <i>circSH3GL3</i> | miR-770-5p   | 1 |
| <i>circSH3GL3</i> | miR-7705     | 1 |
| <i>circSH3GL3</i> | miR-7843-3p  | 1 |
| <i>circSH3GL3</i> | miR-7847-3p  | 3 |
| <i>circSH3GL3</i> | miR-7851-3p  | 2 |
| <i>circSH3GL3</i> | miR-7854-3p  | 1 |
| <i>circSH3GL3</i> | miR-7856-5p  | 2 |
| <i>circSH3GL3</i> | miR-7975     | 2 |
| <i>circSH3GL3</i> | miR-8056     | 1 |
| <i>circSH3GL3</i> | miR-8065     | 1 |
| <i>circSH3GL3</i> | miR-8068     | 1 |
| <i>circSH3GL3</i> | miR-8070     | 1 |
| <i>circSH3GL3</i> | miR-8071     | 3 |
| <i>circSH3GL3</i> | miR-8075     | 3 |
| <i>circSH3GL3</i> | miR-8078     | 1 |
| <i>circSH3GL3</i> | miR-873-3p   | 1 |
| <i>circSH3GL3</i> | miR-873-5p.1 | 1 |
| <i>circSH3GL3</i> | miR-874-3p   | 2 |
| <i>circSH3GL3</i> | miR-875-3p   | 1 |
| <i>circSH3GL3</i> | miR-876-3p   | 1 |
| <i>circSH3GL3</i> | miR-876-5p   | 3 |
| <i>circSH3GL3</i> | miR-885-5p   | 1 |
| <i>circSH3GL3</i> | miR-887-5p   | 1 |
| <i>circSH3GL3</i> | miR-888-5p   | 1 |
| <i>circSH3GL3</i> | miR-889-3p   | 1 |
| <i>circSH3GL3</i> | miR-891b     | 2 |
| <i>circSH3GL3</i> | miR-892-5p   | 2 |
| <i>circSH3GL3</i> | miR-892b     | 2 |
| <i>circSH3GL3</i> | miR-9-5p     | 1 |
| <i>circSH3GL3</i> | miR-924      | 4 |
| <i>circSH3GL3</i> | miR-936      | 1 |

|                   |                     |   |
|-------------------|---------------------|---|
| <i>circSH3GL3</i> | miR-939-3p          | 1 |
| <i>circSH3GL3</i> | miR-942-5p          | 1 |
| <i>circSH3GL3</i> | miR-944             | 1 |
| <i>circSH3GL3</i> | miR-95-5p           | 1 |
| <i>circSH3GL3</i> | miR-9500            | 1 |
| <i>circSIRT5</i>  | miR-101-5p          | 1 |
| <i>circSIRT5</i>  | miR-1231            | 1 |
| <i>circSIRT5</i>  | miR-1250-3p         | 3 |
| <i>circSIRT5</i>  | miR-1252-3p         | 1 |
| <i>circSIRT5</i>  | miR-126-5p          | 1 |
| <i>circSIRT5</i>  | miR-1270            | 3 |
| <i>circSIRT5</i>  | miR-1273e           | 3 |
| <i>circSIRT5</i>  | miR-1277-5p         | 3 |
| <i>circSIRT5</i>  | miR-1287-5p         | 2 |
| <i>circSIRT5</i>  | miR-1298-3p         | 4 |
| <i>circSIRT5</i>  | miR-1299            | 4 |
| <i>circSIRT5</i>  | miR-1302/4298       | 1 |
| <i>circSIRT5</i>  | miR-1304-5p         | 1 |
| <i>circSIRT5</i>  | miR-135b-3p         | 1 |
| <i>circSIRT5</i>  | miR-148b-5p/6874-3p | 2 |
| <i>circSIRT5</i>  | miR-150-5p          | 2 |
| <i>circSIRT5</i>  | miR-155-5p          | 1 |
| <i>circSIRT5</i>  | miR-16-2-3p/195-3p  | 2 |
| <i>circSIRT5</i>  | miR-185-5p          | 2 |
| <i>circSIRT5</i>  | miR-1908-5p         | 1 |
| <i>circSIRT5</i>  | miR-193b-5p         | 1 |
| <i>circSIRT5</i>  | miR-1972            | 1 |
| <i>circSIRT5</i>  | miR-203b-3p         | 3 |
| <i>circSIRT5</i>  | miR-204-3p/4646-5p  | 3 |
| <i>circSIRT5</i>  | miR-20b-3p          | 2 |
| <i>circSIRT5</i>  | miR-2116-3p         | 2 |
| <i>circSIRT5</i>  | miR-2467-5p         | 2 |
| <i>circSIRT5</i>  | miR-27a-5p          | 2 |
| <i>circSIRT5</i>  | miR-296-3p          | 1 |
| <i>circSIRT5</i>  | miR-29b-2-5p        | 1 |
| <i>circSIRT5</i>  | miR-30-3p           | 1 |
| <i>circSIRT5</i>  | miR-3119            | 1 |
| <i>circSIRT5</i>  | miR-3122/3913-5p    | 2 |

|                  |                           |   |
|------------------|---------------------------|---|
| <i>circSIRT5</i> | miR-3126-3p               | 4 |
| <i>circSIRT5</i> | miR-3127-5p               | 1 |
| <i>circSIRT5</i> | miR-3135b                 | 2 |
| <i>circSIRT5</i> | miR-3137                  | 2 |
| <i>circSIRT5</i> | miR-3138                  | 1 |
| <i>circSIRT5</i> | miR-3153/6733-5p/6739-5p  | 1 |
| <i>circSIRT5</i> | miR-3160-5p               | 2 |
| <i>circSIRT5</i> | miR-3168                  | 2 |
| <i>circSIRT5</i> | miR-3182                  | 1 |
| <i>circSIRT5</i> | miR-3188                  | 2 |
| <i>circSIRT5</i> | miR-3192-5p               | 3 |
| <i>circSIRT5</i> | miR-3197                  | 1 |
| <i>circSIRT5</i> | miR-323b-5p/410-5p/494-5p | 3 |
| <i>circSIRT5</i> | miR-335-3p                | 1 |
| <i>circSIRT5</i> | miR-338-5p                | 1 |
| <i>circSIRT5</i> | miR-3612                  | 4 |
| <i>circSIRT5</i> | miR-3646                  | 1 |
| <i>circSIRT5</i> | miR-3662                  | 1 |
| <i>circSIRT5</i> | miR-3686                  | 2 |
| <i>circSIRT5</i> | miR-369-3p                | 1 |
| <i>circSIRT5</i> | miR-374-5p                | 2 |
| <i>circSIRT5</i> | miR-374-5p/655-3p         | 1 |
| <i>circSIRT5</i> | miR-3911                  | 2 |
| <i>circSIRT5</i> | miR-3913-3p               | 1 |
| <i>circSIRT5</i> | miR-3975                  | 2 |
| <i>circSIRT5</i> | miR-410-3p                | 1 |
| <i>circSIRT5</i> | miR-4263                  | 3 |
| <i>circSIRT5</i> | miR-4269/6715b-5p         | 1 |
| <i>circSIRT5</i> | miR-4282                  | 2 |
| <i>circSIRT5</i> | miR-431-3p                | 4 |
| <i>circSIRT5</i> | miR-4426/4647/4662b       | 2 |
| <i>circSIRT5</i> | miR-4443                  | 1 |
| <i>circSIRT5</i> | miR-4464/4748             | 3 |
| <i>circSIRT5</i> | miR-4470                  | 3 |
| <i>circSIRT5</i> | miR-4494                  | 1 |
| <i>circSIRT5</i> | miR-450a-1-3p             | 2 |
| <i>circSIRT5</i> | miR-4514/4692             | 1 |
| <i>circSIRT5</i> | miR-4524a-3p              | 2 |

|                  |                       |   |
|------------------|-----------------------|---|
| <i>circSIRT5</i> | miR-4531              | 3 |
| <i>circSIRT5</i> | miR-4635              | 1 |
| <i>circSIRT5</i> | miR-4650-5p           | 1 |
| <i>circSIRT5</i> | miR-4652-3p           | 2 |
| <i>circSIRT5</i> | miR-4659a-3p/4659b-3p | 2 |
| <i>circSIRT5</i> | miR-4668-5p           | 1 |
| <i>circSIRT5</i> | miR-4698              | 1 |
| <i>circSIRT5</i> | miR-4699-5p           | 1 |
| <i>circSIRT5</i> | miR-4709-3p           | 1 |
| <i>circSIRT5</i> | miR-4711-5p           | 1 |
| <i>circSIRT5</i> | miR-4713-5p           | 1 |
| <i>circSIRT5</i> | miR-4717-5p           | 3 |
| <i>circSIRT5</i> | miR-4731-5p           | 4 |
| <i>circSIRT5</i> | miR-4735-5p           | 1 |
| <i>circSIRT5</i> | miR-4742-5p           | 1 |
| <i>circSIRT5</i> | miR-4743-3p           | 2 |
| <i>circSIRT5</i> | miR-4752              | 1 |
| <i>circSIRT5</i> | miR-4762-5p           | 1 |
| <i>circSIRT5</i> | miR-4767              | 1 |
| <i>circSIRT5</i> | miR-4775              | 2 |
| <i>circSIRT5</i> | miR-4778-3p           | 1 |
| <i>circSIRT5</i> | miR-4782-5p/5706      | 4 |
| <i>circSIRT5</i> | miR-4800-5p           | 1 |
| <i>circSIRT5</i> | miR-4804-5p           | 1 |
| <i>circSIRT5</i> | miR-485-5p            | 2 |
| <i>circSIRT5</i> | miR-499a-3p/499b-3p   | 1 |
| <i>circSIRT5</i> | miR-499b-5p           | 1 |
| <i>circSIRT5</i> | miR-5011-5p           | 1 |
| <i>circSIRT5</i> | miR-5087              | 2 |
| <i>circSIRT5</i> | miR-5093              | 1 |
| <i>circSIRT5</i> | miR-515-5p/519e-5p    | 4 |
| <i>circSIRT5</i> | miR-516b-5p           | 4 |
| <i>circSIRT5</i> | miR-5192              | 2 |
| <i>circSIRT5</i> | miR-525-5p            | 4 |
| <i>circSIRT5</i> | miR-526b-5p           | 2 |
| <i>circSIRT5</i> | miR-532-3p            | 2 |
| <i>circSIRT5</i> | miR-551b-5p           | 2 |
| <i>circSIRT5</i> | miR-5584-3p           | 2 |



|                  |                    |   |
|------------------|--------------------|---|
| <i>circSIRT5</i> | miR-5586-5p        | 2 |
| <i>circSIRT5</i> | miR-5589-5p        | 4 |
| <i>circSIRT5</i> | miR-5692bc         | 1 |
| <i>circSIRT5</i> | miR-5705           | 1 |
| <i>circSIRT5</i> | miR-576-5p         | 3 |
| <i>circSIRT5</i> | miR-578            | 1 |
| <i>circSIRT5</i> | miR-604            | 3 |
| <i>circSIRT5</i> | miR-6083           | 1 |
| <i>circSIRT5</i> | miR-6087           | 1 |
| <i>circSIRT5</i> | miR-615-3p         | 2 |
| <i>circSIRT5</i> | miR-617            | 1 |
| <i>circSIRT5</i> | miR-619-5p/6506-5p | 3 |
| <i>circSIRT5</i> | miR-629-3p         | 3 |
| <i>circSIRT5</i> | miR-629-5p         | 1 |
| <i>circSIRT5</i> | miR-632/4288       | 1 |
| <i>circSIRT5</i> | miR-635/6774-5p    | 1 |
| <i>circSIRT5</i> | miR-640            | 1 |
| <i>circSIRT5</i> | miR-644a           | 2 |
| <i>circSIRT5</i> | miR-6505-3p        | 1 |
| <i>circSIRT5</i> | miR-6513-5p        | 2 |
| <i>circSIRT5</i> | miR-6515-5p        | 1 |
| <i>circSIRT5</i> | miR-6755-3p        | 1 |
| <i>circSIRT5</i> | miR-6762-3p        | 3 |
| <i>circSIRT5</i> | miR-6765-5p        | 3 |
| <i>circSIRT5</i> | miR-6815-3p        | 1 |
| <i>circSIRT5</i> | miR-6818-3p        | 2 |
| <i>circSIRT5</i> | miR-6823-5p        | 1 |
| <i>circSIRT5</i> | miR-6827-5p        | 1 |
| <i>circSIRT5</i> | miR-6833-5p        | 1 |
| <i>circSIRT5</i> | miR-6867-3p        | 1 |
| <i>circSIRT5</i> | miR-6875-3p        | 2 |
| <i>circSIRT5</i> | miR-7112-3p        | 1 |
| <i>circSIRT5</i> | miR-7158-3p        | 3 |
| <i>circSIRT5</i> | miR-7705           | 1 |
| <i>circSIRT5</i> | miR-8063           | 1 |
| <i>circSIRT5</i> | miR-8068           | 2 |
| <i>circSIRT5</i> | miR-8069           | 2 |
| <i>circSIRT5</i> | miR-875-3p         | 1 |

|                  |                          |   |
|------------------|--------------------------|---|
| <i>circSIRT5</i> | miR-887-5p               | 2 |
| <i>circSIRT5</i> | miR-889-3p               | 1 |
| <i>circSIRT5</i> | miR-890                  | 3 |
| <i>circSIRT5</i> | miR-944                  | 1 |
| <i>circSIRT5</i> | let-7-5p/98-5p           | 1 |
| <i>circSIRT5</i> | miR-1-3p/206             | 1 |
| <i>circSIRT5</i> | miR-10-5p                | 1 |
| <i>circSIRT5</i> | miR-1193                 | 1 |
| <i>circSIRT5</i> | miR-1199-5p/6751-3p      | 1 |
| <i>circSIRT5</i> | miR-1200                 | 4 |
| <i>circSIRT5</i> | miR-1202/3972            | 2 |
| <i>circSIRT5</i> | miR-1207-5p/4763-3p      | 2 |
| <i>circSIRT5</i> | miR-122-3p               | 1 |
| <i>circSIRT5</i> | miR-1225-3p              | 2 |
| <i>circSIRT5</i> | miR-1226-3p              | 2 |
| <i>circSIRT5</i> | miR-1227-3p              | 2 |
| <i>circSIRT5</i> | miR-1228-3p              | 2 |
| <i>circSIRT5</i> | miR-1229-3p              | 1 |
| <i>circSIRT5</i> | miR-1233-5p/6778-5p      | 1 |
| <i>circSIRT5</i> | miR-1243                 | 1 |
| <i>circSIRT5</i> | miR-1245b-3p             | 1 |
| <i>circSIRT5</i> | miR-1245b-5p             | 1 |
| <i>circSIRT5</i> | miR-1246                 | 1 |
| <i>circSIRT5</i> | miR-1250-5p              | 3 |
| <i>circSIRT5</i> | miR-1251-3p              | 2 |
| <i>circSIRT5</i> | miR-1252-5p              | 1 |
| <i>circSIRT5</i> | miR-1254/3116            | 2 |
| <i>circSIRT5</i> | miR-1255b-2-3p           | 3 |
| <i>circSIRT5</i> | miR-125b-1-3p            | 1 |
| <i>circSIRT5</i> | miR-125b-2-3p            | 1 |
| <i>circSIRT5</i> | miR-1260a/1260b          | 1 |
| <i>circSIRT5</i> | miR-1262/4701-3p/6736-5p | 2 |
| <i>circSIRT5</i> | miR-1269                 | 1 |
| <i>circSIRT5</i> | miR-1272                 | 2 |
| <i>circSIRT5</i> | miR-1273f                | 2 |
| <i>circSIRT5</i> | miR-1285-5p              | 1 |
| <i>circSIRT5</i> | miR-1286                 | 2 |
| <i>circSIRT5</i> | miR-1288-3p              | 1 |

|                  |                                    |   |
|------------------|------------------------------------|---|
| <i>circSIRT5</i> | miR-1289                           | 1 |
| <i>circSIRT5</i> | miR-129-5p                         | 1 |
| <i>circSIRT5</i> | miR-1290                           | 1 |
| <i>circSIRT5</i> | miR-1291/6775-3p                   | 1 |
| <i>circSIRT5</i> | miR-1293/4483                      | 2 |
| <i>circSIRT5</i> | miR-1295b-3p                       | 1 |
| <i>circSIRT5</i> | miR-1296-3p                        | 2 |
| <i>circSIRT5</i> | miR-1301-3p                        | 1 |
| <i>circSIRT5</i> | miR-1307-3p                        | 1 |
| <i>circSIRT5</i> | miR-1322                           | 2 |
| <i>circSIRT5</i> | miR-134-3p                         | 1 |
| <i>circSIRT5</i> | miR-136-3p                         | 1 |
| <i>circSIRT5</i> | miR-136-5p                         | 1 |
| <i>circSIRT5</i> | miR-137                            | 1 |
| <i>circSIRT5</i> | miR-141-5p                         | 1 |
| <i>circSIRT5</i> | miR-142-3p.1                       | 2 |
| <i>circSIRT5</i> | miR-142-3p.2                       | 1 |
| <i>circSIRT5</i> | miR-143-3p                         | 2 |
| <i>circSIRT5</i> | miR-143-5p                         | 2 |
| <i>circSIRT5</i> | miR-145-3p                         | 2 |
| <i>circSIRT5</i> | miR-1468-3p                        | 2 |
| <i>circSIRT5</i> | miR-146b-3p                        | 1 |
| <i>circSIRT5</i> | miR-149-3p/4728-5p/6785-5p/6883-5p | 3 |
| <i>circSIRT5</i> | miR-152-5p                         | 2 |
| <i>circSIRT5</i> | miR-1587/3620-5p                   | 2 |
| <i>circSIRT5</i> | miR-15a-3p                         | 1 |
| <i>circSIRT5</i> | miR-16-1-3p                        | 1 |
| <i>circSIRT5</i> | miR-181c-3p                        | 2 |
| <i>circSIRT5</i> | miR-181d-3p                        | 1 |
| <i>circSIRT5</i> | miR-1825                           | 1 |
| <i>circSIRT5</i> | miR-1827                           | 2 |
| <i>circSIRT5</i> | miR-184                            | 1 |
| <i>circSIRT5</i> | miR-188-3p                         | 1 |
| <i>circSIRT5</i> | miR-188-5p                         | 1 |
| <i>circSIRT5</i> | miR-19-5p                          | 1 |
| <i>circSIRT5</i> | miR-1910-3p/6511a-5p               | 2 |
| <i>circSIRT5</i> | miR-1915-5p                        | 2 |
| <i>circSIRT5</i> | miR-192-5p/215-5p                  | 1 |

|                  |                                              |   |
|------------------|----------------------------------------------|---|
| <i>circSIRT5</i> | miR-193a-5p                                  | 1 |
| <i>circSIRT5</i> | miR-194-3p                                   | 2 |
| <i>circSIRT5</i> | miR-196a-3p                                  | 1 |
| <i>circSIRT5</i> | miR-1976                                     | 2 |
| <i>circSIRT5</i> | miR-199-5p                                   | 1 |
| <i>circSIRT5</i> | miR-200c-5p/550a-3p                          | 1 |
| <i>circSIRT5</i> | miR-203b-5p/6718-5p                          | 1 |
| <i>circSIRT5</i> | miR-204-5p/211-5p                            | 1 |
| <i>circSIRT5</i> | miR-2052                                     | 1 |
| <i>circSIRT5</i> | miR-2054                                     | 3 |
| <i>circSIRT5</i> | miR-21-3p/3591-3p                            | 4 |
| <i>circSIRT5</i> | miR-2115-3p                                  | 1 |
| <i>circSIRT5</i> | miR-2116-5p                                  | 1 |
| <i>circSIRT5</i> | miR-214-5p                                   | 2 |
| <i>circSIRT5</i> | miR-217                                      | 1 |
| <i>circSIRT5</i> | miR-218-5p                                   | 3 |
| <i>circSIRT5</i> | miR-22-5p                                    | 1 |
| <i>circSIRT5</i> | miR-221-5p/8073                              | 2 |
| <i>circSIRT5</i> | miR-2276-3p                                  | 1 |
| <i>circSIRT5</i> | miR-2277-5p                                  | 2 |
| <i>circSIRT5</i> | miR-2278                                     | 2 |
| <i>circSIRT5</i> | miR-23-3p                                    | 1 |
| <i>circSIRT5</i> | miR-2355-5p                                  | 1 |
| <i>circSIRT5</i> | miR-24-3p                                    | 1 |
| <i>circSIRT5</i> | miR-2467-3p                                  | 1 |
| <i>circSIRT5</i> | miR-25-3p/32-5p/92-3p/363-3p/367-3p          | 1 |
| <i>circSIRT5</i> | miR-2682-3p/6781-3p                          | 2 |
| <i>circSIRT5</i> | miR-26b-3p                                   | 3 |
| <i>circSIRT5</i> | miR-29-3p                                    | 2 |
| <i>circSIRT5</i> | miR-301a-5p/301b-5p                          | 1 |
| <i>circSIRT5</i> | miR-3064-3p                                  | 1 |
| <i>circSIRT5</i> | miR-3065-3p                                  | 1 |
| <i>circSIRT5</i> | miR-3065-5p                                  | 1 |
| <i>circSIRT5</i> | miR-3074-5p                                  | 2 |
| <i>circSIRT5</i> | miR-30b-3p/1273h-5p/3689-3p/6779-5p/6780a-5p | 3 |
| <i>circSIRT5</i> | miR-30c-3p/6788-5p                           | 3 |
| <i>circSIRT5</i> | miR-31-3p                                    | 1 |
| <i>circSIRT5</i> | miR-3120-5p                                  | 1 |

|                  |                       |   |
|------------------|-----------------------|---|
| <i>circSIRT5</i> | miR-3128              | 3 |
| <i>circSIRT5</i> | miR-3130-3p           | 2 |
| <i>circSIRT5</i> | miR-3136-5p/4439      | 1 |
| <i>circSIRT5</i> | miR-3140-3p           | 2 |
| <i>circSIRT5</i> | miR-3140-5p           | 2 |
| <i>circSIRT5</i> | miR-3145-5p           | 2 |
| <i>circSIRT5</i> | miR-3147              | 1 |
| <i>circSIRT5</i> | miR-3150a-5p/3150b-5p | 3 |
| <i>circSIRT5</i> | miR-3152-3p           | 2 |
| <i>circSIRT5</i> | miR-3154              | 1 |
| <i>circSIRT5</i> | miR-3156-3p           | 1 |
| <i>circSIRT5</i> | miR-3156-5p           | 1 |
| <i>circSIRT5</i> | miR-3157-5p           | 4 |
| <i>circSIRT5</i> | miR-3161              | 1 |
| <i>circSIRT5</i> | miR-3162-5p           | 1 |
| <i>circSIRT5</i> | miR-3163              | 1 |
| <i>circSIRT5</i> | miR-3165              | 1 |
| <i>circSIRT5</i> | miR-3173-5p           | 1 |
| <i>circSIRT5</i> | miR-3174              | 1 |
| <i>circSIRT5</i> | miR-3175              | 1 |
| <i>circSIRT5</i> | miR-3176/3922-3p      | 1 |
| <i>circSIRT5</i> | miR-3177-3p           | 1 |
| <i>circSIRT5</i> | miR-3178              | 1 |
| <i>circSIRT5</i> | miR-3180-5p           | 2 |
| <i>circSIRT5</i> | miR-3187-3p           | 1 |
| <i>circSIRT5</i> | miR-3190-5p           | 1 |
| <i>circSIRT5</i> | miR-3194-5p           | 1 |
| <i>circSIRT5</i> | miR-320               | 2 |
| <i>circSIRT5</i> | miR-320e              | 1 |
| <i>circSIRT5</i> | miR-323b-3p           | 1 |
| <i>circSIRT5</i> | miR-329-5p            | 1 |
| <i>circSIRT5</i> | miR-330-3p            | 1 |
| <i>circSIRT5</i> | miR-335-5p            | 2 |
| <i>circSIRT5</i> | miR-338-3p            | 1 |
| <i>circSIRT5</i> | miR-339-5p            | 1 |
| <i>circSIRT5</i> | miR-33a-3p            | 1 |
| <i>circSIRT5</i> | miR-340-3p/6827-3p    | 1 |
| <i>circSIRT5</i> | miR-342-3p            | 2 |

|                  |                           |   |
|------------------|---------------------------|---|
| <i>circSIRT5</i> | miR-345-3p                | 2 |
| <i>circSIRT5</i> | miR-34b-5p/449c-5p        | 2 |
| <i>circSIRT5</i> | miR-3613-3p               | 3 |
| <i>circSIRT5</i> | miR-3613-5p               | 1 |
| <i>circSIRT5</i> | miR-3614-3p               | 2 |
| <i>circSIRT5</i> | miR-3622a-3p/3622b-3p     | 2 |
| <i>circSIRT5</i> | miR-363-5p/6745           | 2 |
| <i>circSIRT5</i> | miR-3650                  | 1 |
| <i>circSIRT5</i> | miR-3653-5p               | 2 |
| <i>circSIRT5</i> | miR-3654                  | 1 |
| <i>circSIRT5</i> | miR-3655                  | 1 |
| <i>circSIRT5</i> | miR-3663-3p               | 2 |
| <i>circSIRT5</i> | miR-3667-3p               | 1 |
| <i>circSIRT5</i> | miR-3672/6864-3p          | 1 |
| <i>circSIRT5</i> | miR-3674                  | 1 |
| <i>circSIRT5</i> | miR-3680-3p               | 2 |
| <i>circSIRT5</i> | miR-3680-5p               | 1 |
| <i>circSIRT5</i> | miR-3682-3p               | 2 |
| <i>circSIRT5</i> | miR-3691-5p               | 1 |
| <i>circSIRT5</i> | miR-3692-3p               | 1 |
| <i>circSIRT5</i> | miR-370-3p                | 1 |
| <i>circSIRT5</i> | miR-371-5p                | 1 |
| <i>circSIRT5</i> | miR-371b-5p/373-5p/616-5p | 1 |
| <i>circSIRT5</i> | miR-372-5p                | 1 |
| <i>circSIRT5</i> | miR-377-3p                | 2 |
| <i>circSIRT5</i> | miR-377-5p/6086           | 1 |
| <i>circSIRT5</i> | miR-378-3p                | 1 |
| <i>circSIRT5</i> | miR-378a-5p               | 4 |
| <i>circSIRT5</i> | miR-378g                  | 2 |
| <i>circSIRT5</i> | miR-379-5p                | 1 |
| <i>circSIRT5</i> | miR-381-3p                | 1 |
| <i>circSIRT5</i> | miR-383-3p                | 1 |
| <i>circSIRT5</i> | miR-383-5p.1              | 1 |
| <i>circSIRT5</i> | miR-383-5p.2              | 2 |
| <i>circSIRT5</i> | miR-3919                  | 1 |
| <i>circSIRT5</i> | miR-3921/4653-5p          | 1 |
| <i>circSIRT5</i> | miR-3925-3p               | 4 |
| <i>circSIRT5</i> | miR-3926                  | 2 |

|                  |                           |   |
|------------------|---------------------------|---|
| <i>circSIRT5</i> | miR-3929/4419b/4478       | 2 |
| <i>circSIRT5</i> | miR-3935                  | 1 |
| <i>circSIRT5</i> | miR-3944-5p               | 1 |
| <i>circSIRT5</i> | miR-3974                  | 2 |
| <i>circSIRT5</i> | miR-3978                  | 1 |
| <i>circSIRT5</i> | miR-425-3p                | 1 |
| <i>circSIRT5</i> | miR-4251                  | 2 |
| <i>circSIRT5</i> | miR-4255                  | 1 |
| <i>circSIRT5</i> | miR-4257                  | 3 |
| <i>circSIRT5</i> | miR-4258                  | 1 |
| <i>circSIRT5</i> | miR-4261                  | 1 |
| <i>circSIRT5</i> | miR-4265/4296/4322        | 1 |
| <i>circSIRT5</i> | miR-4267                  | 4 |
| <i>circSIRT5</i> | miR-4268                  | 4 |
| <i>circSIRT5</i> | miR-4271/4725-3p/6780b-5p | 1 |
| <i>circSIRT5</i> | miR-4273/7156-5p          | 2 |
| <i>circSIRT5</i> | miR-4284                  | 1 |
| <i>circSIRT5</i> | miR-4289                  | 1 |
| <i>circSIRT5</i> | miR-4293                  | 3 |
| <i>circSIRT5</i> | miR-4294                  | 1 |
| <i>circSIRT5</i> | miR-4303                  | 1 |
| <i>circSIRT5</i> | miR-4307                  | 1 |
| <i>circSIRT5</i> | miR-431-5p                | 1 |
| <i>circSIRT5</i> | miR-4312                  | 2 |
| <i>circSIRT5</i> | miR-4314                  | 2 |
| <i>circSIRT5</i> | miR-4324                  | 4 |
| <i>circSIRT5</i> | miR-4325                  | 2 |
| <i>circSIRT5</i> | miR-4327                  | 2 |
| <i>circSIRT5</i> | miR-4329                  | 2 |
| <i>circSIRT5</i> | miR-4417                  | 2 |
| <i>circSIRT5</i> | miR-4421/5699-3p          | 1 |
| <i>circSIRT5</i> | miR-4425                  | 1 |
| <i>circSIRT5</i> | miR-4431                  | 1 |
| <i>circSIRT5</i> | miR-4433a-3p              | 2 |
| <i>circSIRT5</i> | miR-4433b-3p              | 1 |
| <i>circSIRT5</i> | miR-4434/4516/5703        | 1 |
| <i>circSIRT5</i> | miR-4435                  | 1 |
| <i>circSIRT5</i> | miR-4437                  | 1 |

|                  |                    |   |
|------------------|--------------------|---|
| <i>circSIRT5</i> | miR-4444           | 1 |
| <i>circSIRT5</i> | miR-4448           | 4 |
| <i>circSIRT5</i> | miR-4451           | 1 |
| <i>circSIRT5</i> | miR-4455           | 1 |
| <i>circSIRT5</i> | miR-4457           | 1 |
| <i>circSIRT5</i> | miR-4459           | 2 |
| <i>circSIRT5</i> | miR-4460           | 1 |
| <i>circSIRT5</i> | miR-4474-3p        | 1 |
| <i>circSIRT5</i> | miR-4479           | 2 |
| <i>circSIRT5</i> | miR-4480           | 1 |
| <i>circSIRT5</i> | miR-4484           | 1 |
| <i>circSIRT5</i> | miR-4486           | 2 |
| <i>circSIRT5</i> | miR-449b-3p        | 1 |
| <i>circSIRT5</i> | miR-4503           | 1 |
| <i>circSIRT5</i> | miR-450b-3p/769-3p | 2 |
| <i>circSIRT5</i> | miR-450b-5p        | 2 |
| <i>circSIRT5</i> | miR-4512           | 1 |
| <i>circSIRT5</i> | miR-4515           | 1 |
| <i>circSIRT5</i> | miR-4520-2-3p      | 1 |
| <i>circSIRT5</i> | miR-4520-3p        | 1 |
| <i>circSIRT5</i> | miR-4522           | 1 |
| <i>circSIRT5</i> | miR-4529-3p        | 1 |
| <i>circSIRT5</i> | miR-4529-5p        | 1 |
| <i>circSIRT5</i> | miR-4530           | 1 |
| <i>circSIRT5</i> | miR-4532           | 1 |
| <i>circSIRT5</i> | miR-4536-5p        | 1 |
| <i>circSIRT5</i> | miR-4537           | 1 |
| <i>circSIRT5</i> | miR-4539           | 1 |
| <i>circSIRT5</i> | miR-455-3p.2       | 2 |
| <i>circSIRT5</i> | miR-455-5p         | 3 |
| <i>circSIRT5</i> | miR-4634           | 2 |
| <i>circSIRT5</i> | miR-4637           | 2 |
| <i>circSIRT5</i> | miR-4638-3p        | 1 |
| <i>circSIRT5</i> | miR-4638-5p        | 1 |
| <i>circSIRT5</i> | miR-4640-5p        | 1 |
| <i>circSIRT5</i> | miR-4642           | 1 |
| <i>circSIRT5</i> | miR-4648           | 1 |
| <i>circSIRT5</i> | miR-4649-3p        | 3 |



|                  |                             |   |
|------------------|-----------------------------|---|
| <i>circSIRT5</i> | miR-4650-3p                 | 1 |
| <i>circSIRT5</i> | miR-4653-3p                 | 1 |
| <i>circSIRT5</i> | miR-4654/4769-5p            | 1 |
| <i>circSIRT5</i> | miR-4655-5p                 | 1 |
| <i>circSIRT5</i> | miR-4659a-5p/4659b-5p       | 3 |
| <i>circSIRT5</i> | miR-4660                    | 1 |
| <i>circSIRT5</i> | miR-4663                    | 1 |
| <i>circSIRT5</i> | miR-4666a-3p                | 1 |
| <i>circSIRT5</i> | miR-4666b                   | 1 |
| <i>circSIRT5</i> | miR-4668-3p                 | 3 |
| <i>circSIRT5</i> | miR-4670-3p                 | 1 |
| <i>circSIRT5</i> | miR-4674                    | 2 |
| <i>circSIRT5</i> | miR-4677-5p                 | 2 |
| <i>circSIRT5</i> | miR-4680-5p                 | 2 |
| <i>circSIRT5</i> | miR-4684-3p                 | 1 |
| <i>circSIRT5</i> | miR-4684-5p                 | 1 |
| <i>circSIRT5</i> | miR-4685-5p/6837-5p         | 1 |
| <i>circSIRT5</i> | miR-4686                    | 2 |
| <i>circSIRT5</i> | miR-4691-3p                 | 4 |
| <i>circSIRT5</i> | miR-4695-3p                 | 1 |
| <i>circSIRT5</i> | miR-4705                    | 1 |
| <i>circSIRT5</i> | miR-4708-5p                 | 2 |
| <i>circSIRT5</i> | miR-4720-5p/4799-3p/5588-5p | 3 |
| <i>circSIRT5</i> | miR-4722-5p                 | 2 |
| <i>circSIRT5</i> | miR-4724-5p                 | 1 |
| <i>circSIRT5</i> | miR-4727-3p                 | 1 |
| <i>circSIRT5</i> | miR-4727-5p                 | 2 |
| <i>circSIRT5</i> | miR-4728-3p                 | 1 |
| <i>circSIRT5</i> | miR-4730                    | 1 |
| <i>circSIRT5</i> | miR-4733-3p                 | 2 |
| <i>circSIRT5</i> | miR-4733-5p                 | 2 |
| <i>circSIRT5</i> | miR-4736                    | 2 |
| <i>circSIRT5</i> | miR-4738-3p                 | 1 |
| <i>circSIRT5</i> | miR-4740-5p                 | 1 |
| <i>circSIRT5</i> | miR-4743-5p                 | 1 |
| <i>circSIRT5</i> | miR-4746-3p                 | 4 |
| <i>circSIRT5</i> | miR-4747-5p/5196-5p         | 1 |
| <i>circSIRT5</i> | miR-4753-5p                 | 1 |

|                  |                          |   |
|------------------|--------------------------|---|
| <i>circSIRT5</i> | miR-4755-3p              | 2 |
| <i>circSIRT5</i> | miR-4756-3p              | 1 |
| <i>circSIRT5</i> | miR-4757-5p/6744-3p      | 1 |
| <i>circSIRT5</i> | miR-4762-3p              | 1 |
| <i>circSIRT5</i> | miR-4766-5p              | 1 |
| <i>circSIRT5</i> | miR-4768-3p              | 2 |
| <i>circSIRT5</i> | miR-4768-5p/6833-3p      | 1 |
| <i>circSIRT5</i> | miR-4769-3p/6817-5p      | 2 |
| <i>circSIRT5</i> | miR-4772-3p              | 1 |
| <i>circSIRT5</i> | miR-4772-5p              | 1 |
| <i>circSIRT5</i> | miR-4776-3p              | 1 |
| <i>circSIRT5</i> | miR-4785                 | 1 |
| <i>circSIRT5</i> | miR-4786-5p              | 1 |
| <i>circSIRT5</i> | miR-4793-3p              | 2 |
| <i>circSIRT5</i> | miR-4797-5p              | 2 |
| <i>circSIRT5</i> | miR-4798-3p              | 1 |
| <i>circSIRT5</i> | miR-4802-3p              | 2 |
| <i>circSIRT5</i> | miR-486-5p               | 2 |
| <i>circSIRT5</i> | miR-490-5p               | 1 |
| <i>circSIRT5</i> | miR-493-3p               | 3 |
| <i>circSIRT5</i> | miR-495-3p               | 1 |
| <i>circSIRT5</i> | miR-497-3p               | 2 |
| <i>circSIRT5</i> | miR-5001-3p              | 2 |
| <i>circSIRT5</i> | miR-5002-3p              | 2 |
| <i>circSIRT5</i> | miR-5003-5p              | 1 |
| <i>circSIRT5</i> | miR-5006-5p              | 2 |
| <i>circSIRT5</i> | miR-5008-5p              | 3 |
| <i>circSIRT5</i> | miR-5009-5p/8058         | 1 |
| <i>circSIRT5</i> | miR-5011-3p              | 1 |
| <i>circSIRT5</i> | miR-502-5p               | 2 |
| <i>circSIRT5</i> | miR-504-3p               | 1 |
| <i>circSIRT5</i> | miR-504-5p.1             | 1 |
| <i>circSIRT5</i> | miR-505-5p               | 1 |
| <i>circSIRT5</i> | miR-507/557              | 2 |
| <i>circSIRT5</i> | miR-508-5p               | 2 |
| <i>circSIRT5</i> | miR-5088-3p              | 1 |
| <i>circSIRT5</i> | miR-5089-5p              | 2 |
| <i>circSIRT5</i> | miR-509-3-5p/509-5p/4418 | 1 |

|                  |                                                                  |   |
|------------------|------------------------------------------------------------------|---|
| <i>circSIRT5</i> | miR-5100                                                         | 1 |
| <i>circSIRT5</i> | miR-511-3p                                                       | 1 |
| <i>circSIRT5</i> | miR-511-5p                                                       | 1 |
| <i>circSIRT5</i> | miR-513c-5p/514b-5p                                              | 2 |
| <i>circSIRT5</i> | miR-5187-5p                                                      | 2 |
| <i>circSIRT5</i> | miR-5189-3p                                                      | 2 |
| <i>circSIRT5</i> | miR-518a-5p/527                                                  | 3 |
| <i>circSIRT5</i> | miR-5190                                                         | 1 |
| <i>circSIRT5</i> | miR-519d-5p                                                      | 2 |
| <i>circSIRT5</i> | miR-524-5p                                                       | 1 |
| <i>circSIRT5</i> | miR-532-5p                                                       | 2 |
| <i>circSIRT5</i> | miR-541-5p                                                       | 1 |
| <i>circSIRT5</i> | miR-544a                                                         | 2 |
| <i>circSIRT5</i> | miR-544b                                                         | 4 |
| <i>circSIRT5</i> | miR-548ac/548bb-3p/548d-3p/548h-3p/548z                          | 2 |
| <i>circSIRT5</i> | miR-548aj-5p/548f-5p/548g-5p/548x-5p                             | 2 |
| <i>circSIRT5</i> | miR-548an                                                        | 1 |
| <i>circSIRT5</i> | miR-548aq-3p/548am-3p/548aj-3p/548ah-3p/548ae-3p/548j-3p/548x-3p | 2 |
| <i>circSIRT5</i> | miR-548av-3p                                                     | 1 |
| <i>circSIRT5</i> | miR-548aw                                                        | 3 |
| <i>circSIRT5</i> | miR-548az-3p/548ar-3p/548a-3p/548e-3p/548f-3p                    | 2 |
| <i>circSIRT5</i> | miR-548c-3p                                                      | 2 |
| <i>circSIRT5</i> | miR-548g-3p                                                      | 3 |
| <i>circSIRT5</i> | miR-548p                                                         | 1 |
| <i>circSIRT5</i> | miR-548s                                                         | 1 |
| <i>circSIRT5</i> | miR-550b-2-5p                                                    | 1 |
| <i>circSIRT5</i> | miR-5571-5p                                                      | 1 |
| <i>circSIRT5</i> | miR-5580-5p                                                      | 1 |
| <i>circSIRT5</i> | miR-5582-3p                                                      | 2 |
| <i>circSIRT5</i> | miR-5590-5p                                                      | 3 |
| <i>circSIRT5</i> | miR-5687                                                         | 1 |
| <i>circSIRT5</i> | miR-5690                                                         | 1 |
| <i>circSIRT5</i> | miR-5692a                                                        | 1 |
| <i>circSIRT5</i> | miR-5693                                                         | 2 |
| <i>circSIRT5</i> | miR-5694                                                         | 2 |
| <i>circSIRT5</i> | miR-5695                                                         | 2 |
| <i>circSIRT5</i> | miR-5700                                                         | 1 |
| <i>circSIRT5</i> | miR-575/4676-5p                                                  | 1 |

|                  |                                      |   |
|------------------|--------------------------------------|---|
| <i>circSIRT5</i> | miR-576-3p                           | 1 |
| <i>circSIRT5</i> | miR-579-5p                           | 2 |
| <i>circSIRT5</i> | miR-581                              | 1 |
| <i>circSIRT5</i> | miR-584-3p                           | 2 |
| <i>circSIRT5</i> | miR-588                              | 1 |
| <i>circSIRT5</i> | miR-593-3p                           | 1 |
| <i>circSIRT5</i> | miR-596                              | 3 |
| <i>circSIRT5</i> | miR-597-3p                           | 2 |
| <i>circSIRT5</i> | miR-605-5p                           | 1 |
| <i>circSIRT5</i> | miR-6073                             | 2 |
| <i>circSIRT5</i> | miR-6075                             | 1 |
| <i>circSIRT5</i> | miR-6081                             | 1 |
| <i>circSIRT5</i> | miR-6089                             | 3 |
| <i>circSIRT5</i> | miR-609                              | 1 |
| <i>circSIRT5</i> | miR-612/1285-3p/3187-5p/5189-5p/6860 | 2 |
| <i>circSIRT5</i> | miR-6126                             | 2 |
| <i>circSIRT5</i> | miR-6128                             | 1 |
| <i>circSIRT5</i> | miR-623                              | 1 |
| <i>circSIRT5</i> | miR-627-3p                           | 1 |
| <i>circSIRT5</i> | miR-634                              | 3 |
| <i>circSIRT5</i> | miR-636                              | 2 |
| <i>circSIRT5</i> | miR-643                              | 1 |
| <i>circSIRT5</i> | miR-6499-3p                          | 1 |
| <i>circSIRT5</i> | miR-6499-5p                          | 1 |
| <i>circSIRT5</i> | miR-6502-3p                          | 1 |
| <i>circSIRT5</i> | miR-6508-3p                          | 1 |
| <i>circSIRT5</i> | miR-651-3p                           | 1 |
| <i>circSIRT5</i> | miR-6514-3p                          | 2 |
| <i>circSIRT5</i> | miR-6516-5p                          | 2 |
| <i>circSIRT5</i> | miR-652-3p                           | 1 |
| <i>circSIRT5</i> | miR-653-5p                           | 1 |
| <i>circSIRT5</i> | miR-655-5p                           | 1 |
| <i>circSIRT5</i> | miR-656-5p                           | 1 |
| <i>circSIRT5</i> | miR-661                              | 2 |
| <i>circSIRT5</i> | miR-6715a-3p                         | 2 |
| <i>circSIRT5</i> | miR-6715b-3p                         | 2 |
| <i>circSIRT5</i> | miR-6720-5p                          | 2 |
| <i>circSIRT5</i> | miR-6728-5p                          | 2 |

|                  |                     |   |
|------------------|---------------------|---|
| <i>circSIRT5</i> | miR-6729-3p         | 1 |
| <i>circSIRT5</i> | miR-6731-5p/8085    | 1 |
| <i>circSIRT5</i> | miR-6732-3p         | 1 |
| <i>circSIRT5</i> | miR-6734-3p         | 1 |
| <i>circSIRT5</i> | miR-6736-3p         | 4 |
| <i>circSIRT5</i> | miR-6738-3p         | 2 |
| <i>circSIRT5</i> | miR-6740-3p         | 1 |
| <i>circSIRT5</i> | miR-6741-5p         | 2 |
| <i>circSIRT5</i> | miR-6742-3p         | 2 |
| <i>circSIRT5</i> | miR-6746-5p         | 1 |
| <i>circSIRT5</i> | miR-6748-3p         | 1 |
| <i>circSIRT5</i> | miR-6750-3p         | 1 |
| <i>circSIRT5</i> | miR-6752-3p         | 1 |
| <i>circSIRT5</i> | miR-6756-5p/6766-5p | 2 |
| <i>circSIRT5</i> | miR-6757-5p         | 1 |
| <i>circSIRT5</i> | miR-6759-5p         | 1 |
| <i>circSIRT5</i> | miR-6761-5p         | 2 |
| <i>circSIRT5</i> | miR-6765-3p         | 2 |
| <i>circSIRT5</i> | miR-6768-3p         | 1 |
| <i>circSIRT5</i> | miR-6770-3p         | 1 |
| <i>circSIRT5</i> | miR-6771-3p         | 1 |
| <i>circSIRT5</i> | miR-6771-5p         | 1 |
| <i>circSIRT5</i> | miR-6772-3p         | 1 |
| <i>circSIRT5</i> | miR-6772-5p         | 1 |
| <i>circSIRT5</i> | miR-6776-5p         | 2 |
| <i>circSIRT5</i> | miR-6777-5p/6889-5p | 1 |
| <i>circSIRT5</i> | miR-6780a-3p        | 1 |
| <i>circSIRT5</i> | miR-6782-3p         | 1 |
| <i>circSIRT5</i> | miR-6783-5p         | 1 |
| <i>circSIRT5</i> | miR-6784-5p         | 1 |
| <i>circSIRT5</i> | miR-6786-5p         | 1 |
| <i>circSIRT5</i> | miR-6787-3p         | 2 |
| <i>circSIRT5</i> | miR-6788-3p         | 1 |
| <i>circSIRT5</i> | miR-6790-3p         | 1 |
| <i>circSIRT5</i> | miR-6792-5p         | 1 |
| <i>circSIRT5</i> | miR-6796-5p         | 1 |
| <i>circSIRT5</i> | miR-6798-5p         | 1 |
| <i>circSIRT5</i> | miR-6799-5p         | 3 |

|                  |             |   |
|------------------|-------------|---|
| <i>circSIRT5</i> | miR-6801-5p | 1 |
| <i>circSIRT5</i> | miR-6804-3p | 2 |
| <i>circSIRT5</i> | miR-6807-5p | 2 |
| <i>circSIRT5</i> | miR-6809-3p | 1 |
| <i>circSIRT5</i> | miR-6811-3p | 2 |
| <i>circSIRT5</i> | miR-6821-3p | 1 |
| <i>circSIRT5</i> | miR-6825-5p | 1 |
| <i>circSIRT5</i> | miR-6841-3p | 2 |
| <i>circSIRT5</i> | miR-6847-3p | 2 |
| <i>circSIRT5</i> | miR-6847-5p | 3 |
| <i>circSIRT5</i> | miR-6849-3p | 4 |
| <i>circSIRT5</i> | miR-6850-3p | 1 |
| <i>circSIRT5</i> | miR-6851-3p | 1 |
| <i>circSIRT5</i> | miR-6852-5p | 2 |
| <i>circSIRT5</i> | miR-6854-5p | 1 |
| <i>circSIRT5</i> | miR-6858-3p | 1 |
| <i>circSIRT5</i> | miR-6861-5p | 2 |
| <i>circSIRT5</i> | miR-6864-5p | 2 |
| <i>circSIRT5</i> | miR-6868-5p | 3 |
| <i>circSIRT5</i> | miR-6870-3p | 1 |
| <i>circSIRT5</i> | miR-6871-3p | 2 |
| <i>circSIRT5</i> | miR-6871-5p | 1 |
| <i>circSIRT5</i> | miR-6873-3p | 1 |
| <i>circSIRT5</i> | miR-6874-5p | 1 |
| <i>circSIRT5</i> | miR-6878-5p | 1 |
| <i>circSIRT5</i> | miR-6880-5p | 1 |
| <i>circSIRT5</i> | miR-6881-3p | 1 |
| <i>circSIRT5</i> | miR-6885-3p | 2 |
| <i>circSIRT5</i> | miR-6888-5p | 1 |
| <i>circSIRT5</i> | miR-6894-3p | 2 |
| <i>circSIRT5</i> | miR-6895-3p | 1 |
| <i>circSIRT5</i> | miR-6895-5p | 1 |
| <i>circSIRT5</i> | miR-7-3p    | 1 |
| <i>circSIRT5</i> | miR-7106-3p | 1 |
| <i>circSIRT5</i> | miR-7106-5p | 3 |
| <i>circSIRT5</i> | miR-7108-3p | 1 |
| <i>circSIRT5</i> | miR-7108-5p | 1 |
| <i>circSIRT5</i> | miR-7111-3p | 1 |

|                  |                         |   |
|------------------|-------------------------|---|
| <i>circSIRT5</i> | miR-7113-5p             | 1 |
| <i>circSIRT5</i> | miR-7151-5p             | 1 |
| <i>circSIRT5</i> | miR-7152-5p             | 2 |
| <i>circSIRT5</i> | miR-7153-3p             | 1 |
| <i>circSIRT5</i> | miR-7156-3p             | 1 |
| <i>circSIRT5</i> | miR-7160-3p             | 1 |
| <i>circSIRT5</i> | miR-7160-5p             | 1 |
| <i>circSIRT5</i> | miR-7162-3p             | 3 |
| <i>circSIRT5</i> | miR-759                 | 1 |
| <i>circSIRT5</i> | miR-766-3p              | 4 |
| <i>circSIRT5</i> | miR-769-5p              | 1 |
| <i>circSIRT5</i> | miR-7703                | 2 |
| <i>circSIRT5</i> | miR-7849-3p             | 1 |
| <i>circSIRT5</i> | miR-7855-5p             | 1 |
| <i>circSIRT5</i> | miR-7973                | 1 |
| <i>circSIRT5</i> | miR-7976                | 1 |
| <i>circSIRT5</i> | miR-7977                | 2 |
| <i>circSIRT5</i> | miR-8055                | 1 |
| <i>circSIRT5</i> | miR-8056                | 1 |
| <i>circSIRT5</i> | miR-8057                | 1 |
| <i>circSIRT5</i> | miR-8060                | 1 |
| <i>circSIRT5</i> | miR-8066                | 1 |
| <i>circSIRT5</i> | miR-8071                | 1 |
| <i>circSIRT5</i> | miR-8074                | 1 |
| <i>circSIRT5</i> | miR-8077                | 1 |
| <i>circSIRT5</i> | miR-8081                | 1 |
| <i>circSIRT5</i> | miR-873-5p.2            | 2 |
| <i>circSIRT5</i> | miR-876-5p              | 1 |
| <i>circSIRT5</i> | miR-885-5p              | 1 |
| <i>circSIRT5</i> | miR-891a-5p             | 1 |
| <i>circSIRT5</i> | miR-9-3p                | 1 |
| <i>circSIRT5</i> | miR-9-5p                | 1 |
| <i>circSIRT5</i> | miR-92b-5p              | 1 |
| <i>circSIRT5</i> | miR-939-3p              | 2 |
| <i>circSIRT5</i> | miR-939-5p/1343-5p      | 1 |
| <i>circSIRT5</i> | miR-940/6808-5p/6893-5p | 2 |
| <i>circSIRT5</i> | miR-941                 | 1 |
| <i>circSIRT5</i> | miR-942-5p              | 1 |

|                  |                                 |   |
|------------------|---------------------------------|---|
| <i>circSIRT5</i> | miR-943                         | 1 |
| <i>circSIRT5</i> | miR-95-5p                       | 1 |
| <i>circSIRT5</i> | miR-103-3p/107                  | 1 |
| <i>circSIRT5</i> | miR-1224-3p                     | 1 |
| <i>circSIRT5</i> | miR-1225-5p                     | 1 |
| <i>circSIRT5</i> | miR-1228-5p                     | 1 |
| <i>circSIRT5</i> | miR-1229-5p                     | 1 |
| <i>circSIRT5</i> | miR-1236-3p                     | 1 |
| <i>circSIRT5</i> | miR-1237-5p/4488/4697-5p        | 1 |
| <i>circSIRT5</i> | miR-124-5p                      | 1 |
| <i>circSIRT5</i> | miR-1273g-3p                    | 1 |
| <i>circSIRT5</i> | miR-1275/4665-5p                | 1 |
| <i>circSIRT5</i> | miR-128-3p                      | 1 |
| <i>circSIRT5</i> | miR-1294                        | 1 |
| <i>circSIRT5</i> | miR-1306-5p                     | 1 |
| <i>circSIRT5</i> | miR-135-5p                      | 1 |
| <i>circSIRT5</i> | miR-140-3p.1                    | 1 |
| <i>circSIRT5</i> | miR-140-3p.2                    | 2 |
| <i>circSIRT5</i> | miR-183-5p.1                    | 1 |
| <i>circSIRT5</i> | miR-183-5p.2                    | 1 |
| <i>circSIRT5</i> | miR-193-3p                      | 1 |
| <i>circSIRT5</i> | miR-202-3p                      | 1 |
| <i>circSIRT5</i> | miR-2053                        | 1 |
| <i>circSIRT5</i> | miR-210-5p                      | 1 |
| <i>circSIRT5</i> | miR-215-3p                      | 1 |
| <i>circSIRT5</i> | miR-27-3p                       | 1 |
| <i>circSIRT5</i> | miR-28-3p                       | 1 |
| <i>circSIRT5</i> | miR-302-3p/372-3p/373-3p/520-3p | 1 |
| <i>circSIRT5</i> | miR-3125/3916/6859-5p           | 1 |
| <i>circSIRT5</i> | miR-3170/6855-5p                | 1 |
| <i>circSIRT5</i> | miR-3191-5p                     | 1 |
| <i>circSIRT5</i> | miR-323a-5p                     | 1 |
| <i>circSIRT5</i> | miR-328-5p/6885-5p              | 1 |
| <i>circSIRT5</i> | miR-331-3p                      | 1 |
| <i>circSIRT5</i> | miR-33b-3p/515-3p/519e-3p       | 1 |
| <i>circSIRT5</i> | miR-342-5p/4664-5p              | 1 |
| <i>circSIRT5</i> | miR-3605-3p                     | 1 |
| <i>circSIRT5</i> | miR-3670                        | 1 |



|                  |                          |   |
|------------------|--------------------------|---|
| <i>circSIRT5</i> | miR-3692-5p              | 1 |
| <i>circSIRT5</i> | miR-371a-3p              | 1 |
| <i>circSIRT5</i> | miR-371b-3p              | 1 |
| <i>circSIRT5</i> | miR-3928-3p              | 1 |
| <i>circSIRT5</i> | miR-3943                 | 1 |
| <i>circSIRT5</i> | miR-412-3p/6754-3p       | 1 |
| <i>circSIRT5</i> | miR-4252                 | 1 |
| <i>circSIRT5</i> | miR-4292/6791-5p         | 1 |
| <i>circSIRT5</i> | miR-4305                 | 1 |
| <i>circSIRT5</i> | miR-4308                 | 1 |
| <i>circSIRT5</i> | miR-4313                 | 1 |
| <i>circSIRT5</i> | miR-4316                 | 1 |
| <i>circSIRT5</i> | miR-4323                 | 1 |
| <i>circSIRT5</i> | miR-4427                 | 1 |
| <i>circSIRT5</i> | miR-4476/6876-5p         | 1 |
| <i>circSIRT5</i> | miR-4649-5p/6729-5p      | 1 |
| <i>circSIRT5</i> | miR-4661-3p              | 1 |
| <i>circSIRT5</i> | miR-4667-5p/4700-5p/8089 | 2 |
| <i>circSIRT5</i> | miR-4680-3p              | 1 |
| <i>circSIRT5</i> | miR-4691-5p/6792-3p      | 1 |
| <i>circSIRT5</i> | miR-4714-3p              | 1 |
| <i>circSIRT5</i> | miR-4722-3p/6727-3p      | 1 |
| <i>circSIRT5</i> | miR-4749-3p              | 1 |
| <i>circSIRT5</i> | miR-4760-3p              | 1 |
| <i>circSIRT5</i> | miR-4763-5p              | 1 |
| <i>circSIRT5</i> | miR-4790-3p              | 1 |
| <i>circSIRT5</i> | miR-4795-5p              | 1 |
| <i>circSIRT5</i> | miR-486-3p               | 1 |
| <i>circSIRT5</i> | miR-505-3p.1             | 1 |
| <i>circSIRT5</i> | miR-506-5p               | 1 |
| <i>circSIRT5</i> | miR-513a-5p              | 1 |
| <i>circSIRT5</i> | miR-5187-3p              | 1 |
| <i>circSIRT5</i> | miR-519-3p               | 1 |
| <i>circSIRT5</i> | miR-5193                 | 1 |
| <i>circSIRT5</i> | miR-5197-5p              | 1 |
| <i>circSIRT5</i> | miR-564                  | 1 |
| <i>circSIRT5</i> | miR-608/4651             | 1 |
| <i>circSIRT5</i> | miR-619-3p               | 1 |

|                   |                             |   |
|-------------------|-----------------------------|---|
| <i>circSIRT5</i>  | miR-637                     | 2 |
| <i>circSIRT5</i>  | miR-647                     | 1 |
| <i>circSIRT5</i>  | miR-6515-3p                 | 1 |
| <i>circSIRT5</i>  | miR-660-3p                  | 1 |
| <i>circSIRT5</i>  | miR-6737-5p/6812-5p/6819-5p | 1 |
| <i>circSIRT5</i>  | miR-6747-3p                 | 1 |
| <i>circSIRT5</i>  | miR-6747-5p                 | 1 |
| <i>circSIRT5</i>  | miR-6749-3p                 | 1 |
| <i>circSIRT5</i>  | miR-6751-5p/6803-5p         | 1 |
| <i>circSIRT5</i>  | miR-676-5p                  | 1 |
| <i>circSIRT5</i>  | miR-6769a-3p                | 1 |
| <i>circSIRT5</i>  | miR-6773-3p                 | 1 |
| <i>circSIRT5</i>  | miR-6776-3p                 | 1 |
| <i>circSIRT5</i>  | miR-6795-5p/6887-5p         | 1 |
| <i>circSIRT5</i>  | miR-6801-3p/6810-3p         | 1 |
| <i>circSIRT5</i>  | miR-6817-3p                 | 1 |
| <i>circSIRT5</i>  | miR-6836-3p                 | 1 |
| <i>circSIRT5</i>  | miR-6837-3p                 | 1 |
| <i>circSIRT5</i>  | miR-6840-5p                 | 1 |
| <i>circSIRT5</i>  | miR-6842-3p                 | 1 |
| <i>circSIRT5</i>  | miR-6843-3p/6848-3p         | 1 |
| <i>circSIRT5</i>  | miR-6846-5p/6848-5p         | 1 |
| <i>circSIRT5</i>  | miR-6886-5p                 | 1 |
| <i>circSIRT5</i>  | miR-6888-3p                 | 1 |
| <i>circSIRT5</i>  | miR-7109-5p                 | 1 |
| <i>circSIRT5</i>  | miR-7110-3p                 | 1 |
| <i>circSIRT5</i>  | miR-7150                    | 2 |
| <i>circSIRT5</i>  | miR-7155-5p                 | 2 |
| <i>circSIRT5</i>  | miR-7851-3p                 | 1 |
| <i>circSIRT5</i>  | miR-876-3p                  | 1 |
| <i>circSIRT5</i>  | miR-885-3p                  | 1 |
| <i>circSIRT5</i>  | miR-889-5p                  | 1 |
| <i>circSIRT5</i>  | miR-892-5p                  | 1 |
| <i>circSIRT5</i>  | miR-892b                    | 1 |
| <i>circSIRT5</i>  | miR-93-3p                   | 1 |
| <i>circSLAIN1</i> | miR-1-5p                    | 4 |
| <i>circSLAIN1</i> | miR-100-3p                  | 2 |
| <i>circSLAIN1</i> | miR-103-3p/107              | 1 |

|                   |                     |   |
|-------------------|---------------------|---|
| <i>circSLAIN1</i> | miR-105-5p          | 5 |
| <i>circSLAIN1</i> | miR-1179            | 1 |
| <i>circSLAIN1</i> | miR-1183            | 5 |
| <i>circSLAIN1</i> | miR-1193            | 4 |
| <i>circSLAIN1</i> | miR-1197            | 2 |
| <i>circSLAIN1</i> | miR-1200            | 5 |
| <i>circSLAIN1</i> | miR-1202/3972       | 1 |
| <i>circSLAIN1</i> | miR-1208            | 4 |
| <i>circSLAIN1</i> | miR-122-3p          | 1 |
| <i>circSLAIN1</i> | miR-1227-5p         | 3 |
| <i>circSLAIN1</i> | miR-1229-3p         | 3 |
| <i>circSLAIN1</i> | miR-1231            | 1 |
| <i>circSLAIN1</i> | miR-1233-3p         | 4 |
| <i>circSLAIN1</i> | miR-1236-3p         | 9 |
| <i>circSLAIN1</i> | miR-1237-3p         | 4 |
| <i>circSLAIN1</i> | miR-1238-3p         | 9 |
| <i>circSLAIN1</i> | miR-1238-5p/4758-5p | 4 |
| <i>circSLAIN1</i> | miR-1243            | 5 |
| <i>circSLAIN1</i> | miR-1245b-3p        | 7 |
| <i>circSLAIN1</i> | miR-1245b-5p        | 1 |
| <i>circSLAIN1</i> | miR-1247-3p         | 9 |
| <i>circSLAIN1</i> | miR-1248            | 4 |
| <i>circSLAIN1</i> | miR-1250-3p         | 1 |
| <i>circSLAIN1</i> | miR-1251-3p         | 1 |
| <i>circSLAIN1</i> | miR-1252-3p         | 5 |
| <i>circSLAIN1</i> | miR-1252-5p         | 3 |
| <i>circSLAIN1</i> | miR-1253            | 4 |
| <i>circSLAIN1</i> | miR-1255b-2-3p      | 1 |
| <i>circSLAIN1</i> | miR-1257            | 6 |
| <i>circSLAIN1</i> | miR-125a-3p         | 3 |
| <i>circSLAIN1</i> | miR-126-5p          | 7 |
| <i>circSLAIN1</i> | miR-1264            | 4 |
| <i>circSLAIN1</i> | miR-1266-3p         | 2 |
| <i>circSLAIN1</i> | miR-1266-5p/4518    | 2 |
| <i>circSLAIN1</i> | miR-1267            | 3 |
| <i>circSLAIN1</i> | miR-1270            | 9 |
| <i>circSLAIN1</i> | miR-1272            | 1 |
| <i>circSLAIN1</i> | miR-1273g-3p        | 1 |

|                   |                    |   |
|-------------------|--------------------|---|
| <i>circSLAIN1</i> | miR-1273g-5p       | 4 |
| <i>circSLAIN1</i> | miR-1273h-3p       | 2 |
| <i>circSLAIN1</i> | miR-1276           | 1 |
| <i>circSLAIN1</i> | miR-1278           | 4 |
| <i>circSLAIN1</i> | miR-1279           | 5 |
| <i>circSLAIN1</i> | miR-1283           | 4 |
| <i>circSLAIN1</i> | miR-1285-5p        | 2 |
| <i>circSLAIN1</i> | miR-1287-5p        | 4 |
| <i>circSLAIN1</i> | miR-1288-3p        | 4 |
| <i>circSLAIN1</i> | miR-1289           | 1 |
| <i>circSLAIN1</i> | miR-1290           | 1 |
| <i>circSLAIN1</i> | miR-1292-5p        | 9 |
| <i>circSLAIN1</i> | miR-1294           | 4 |
| <i>circSLAIN1</i> | miR-1295a          | 1 |
| <i>circSLAIN1</i> | miR-1296-3p        | 4 |
| <i>circSLAIN1</i> | miR-1298-3p        | 3 |
| <i>circSLAIN1</i> | miR-1299           | 3 |
| <i>circSLAIN1</i> | miR-1301-3p        | 1 |
| <i>circSLAIN1</i> | miR-1303           | 4 |
| <i>circSLAIN1</i> | miR-1304-3p        | 4 |
| <i>circSLAIN1</i> | miR-1304-5p        | 5 |
| <i>circSLAIN1</i> | miR-1305           | 1 |
| <i>circSLAIN1</i> | miR-130b-5p        | 4 |
| <i>circSLAIN1</i> | miR-132-3p/212-3p  | 1 |
| <i>circSLAIN1</i> | miR-1322           | 1 |
| <i>circSLAIN1</i> | miR-1324           | 4 |
| <i>circSLAIN1</i> | miR-133a-3p.1      | 2 |
| <i>circSLAIN1</i> | miR-133a-3p.2/133b | 7 |
| <i>circSLAIN1</i> | miR-133a-5p        | 3 |
| <i>circSLAIN1</i> | miR-134-5p         | 3 |
| <i>circSLAIN1</i> | miR-135b-3p        | 4 |
| <i>circSLAIN1</i> | miR-136-5p         | 3 |
| <i>circSLAIN1</i> | miR-137            | 3 |
| <i>circSLAIN1</i> | miR-138-2-3p       | 3 |
| <i>circSLAIN1</i> | miR-138-5p         | 3 |
| <i>circSLAIN1</i> | miR-139-3p         | 4 |
| <i>circSLAIN1</i> | miR-140-3p.2       | 1 |
| <i>circSLAIN1</i> | miR-140-5p         | 4 |

|                   |                                      |   |
|-------------------|--------------------------------------|---|
| <i>circSLAIN1</i> | miR-145-3p                           | 5 |
| <i>circSLAIN1</i> | miR-145-5p                           | 6 |
| <i>circSLAIN1</i> | miR-146a-3p                          | 4 |
| <i>circSLAIN1</i> | miR-148b-5p/6874-3p                  | 3 |
| <i>circSLAIN1</i> | miR-15-5p/16-5p/195-5p/424-5p/497-5p | 5 |
| <i>circSLAIN1</i> | miR-153-3p                           | 1 |
| <i>circSLAIN1</i> | miR-153-5p                           | 1 |
| <i>circSLAIN1</i> | miR-155-3p                           | 4 |
| <i>circSLAIN1</i> | miR-155-5p                           | 5 |
| <i>circSLAIN1</i> | miR-1587/3620-5p                     | 2 |
| <i>circSLAIN1</i> | miR-15b-3p                           | 4 |
| <i>circSLAIN1</i> | miR-181-3p/4420                      | 4 |
| <i>circSLAIN1</i> | miR-181-5p                           | 2 |
| <i>circSLAIN1</i> | miR-181a-3p                          | 1 |
| <i>circSLAIN1</i> | miR-1825                             | 1 |
| <i>circSLAIN1</i> | miR-1827                             | 1 |
| <i>circSLAIN1</i> | miR-183-3p                           | 1 |
| <i>circSLAIN1</i> | miR-185-3p                           | 9 |
| <i>circSLAIN1</i> | miR-185-5p                           | 1 |
| <i>circSLAIN1</i> | miR-186-5p                           | 1 |
| <i>circSLAIN1</i> | miR-1910-3p/6511a-5p                 | 1 |
| <i>circSLAIN1</i> | miR-1911-3p                          | 1 |
| <i>circSLAIN1</i> | miR-1911-5p                          | 1 |
| <i>circSLAIN1</i> | miR-1915-5p                          | 2 |
| <i>circSLAIN1</i> | miR-194-3p                           | 3 |
| <i>circSLAIN1</i> | miR-194-5p                           | 1 |
| <i>circSLAIN1</i> | miR-196-5p                           | 3 |
| <i>circSLAIN1</i> | miR-199-3p                           | 1 |
| <i>circSLAIN1</i> | miR-199-5p                           | 1 |
| <i>circSLAIN1</i> | miR-200-3p/429                       | 6 |
| <i>circSLAIN1</i> | miR-202-5p                           | 1 |
| <i>circSLAIN1</i> | miR-203a-3p.1                        | 1 |
| <i>circSLAIN1</i> | miR-203a-5p                          | 4 |
| <i>circSLAIN1</i> | miR-203b-3p                          | 5 |
| <i>circSLAIN1</i> | miR-203b-5p/6718-5p                  | 4 |
| <i>circSLAIN1</i> | miR-204-3p/4646-5p                   | 6 |
| <i>circSLAIN1</i> | miR-204-5p/211-5p                    | 5 |
| <i>circSLAIN1</i> | miR-2054                             | 4 |

|                   |                                              |    |
|-------------------|----------------------------------------------|----|
| <i>circSLAIN1</i> | miR-208-5p                                   | 6  |
| <i>circSLAIN1</i> | miR-20a-3p                                   | 1  |
| <i>circSLAIN1</i> | miR-210-5p                                   | 4  |
| <i>circSLAIN1</i> | miR-211-3p                                   | 1  |
| <i>circSLAIN1</i> | miR-2110                                     | 12 |
| <i>circSLAIN1</i> | miR-2113                                     | 3  |
| <i>circSLAIN1</i> | miR-2115-5p                                  | 2  |
| <i>circSLAIN1</i> | miR-2116-5p                                  | 3  |
| <i>circSLAIN1</i> | miR-2117                                     | 3  |
| <i>circSLAIN1</i> | miR-214-5p                                   | 2  |
| <i>circSLAIN1</i> | miR-216a-5p                                  | 3  |
| <i>circSLAIN1</i> | miR-216b-5p                                  | 3  |
| <i>circSLAIN1</i> | miR-217                                      | 2  |
| <i>circSLAIN1</i> | miR-219a-1-3p                                | 2  |
| <i>circSLAIN1</i> | miR-22-5p                                    | 3  |
| <i>circSLAIN1</i> | miR-221-3p/222-3p                            | 1  |
| <i>circSLAIN1</i> | miR-223-5p                                   | 6  |
| <i>circSLAIN1</i> | miR-2276-3p                                  | 1  |
| <i>circSLAIN1</i> | miR-2276-5p                                  | 1  |
| <i>circSLAIN1</i> | miR-2278                                     | 1  |
| <i>circSLAIN1</i> | miR-23-3p                                    | 3  |
| <i>circSLAIN1</i> | miR-24-5p                                    | 2  |
| <i>circSLAIN1</i> | miR-2467-5p                                  | 4  |
| <i>circSLAIN1</i> | miR-26b-3p                                   | 3  |
| <i>circSLAIN1</i> | miR-27a-5p                                   | 2  |
| <i>circSLAIN1</i> | miR-299-3p                                   | 1  |
| <i>circSLAIN1</i> | miR-30-3p                                    | 3  |
| <i>circSLAIN1</i> | miR-301a-5p/301b-5p                          | 2  |
| <i>circSLAIN1</i> | miR-302c-3p.2/520-3p                         | 1  |
| <i>circSLAIN1</i> | miR-3064-3p                                  | 1  |
| <i>circSLAIN1</i> | miR-3065-3p                                  | 1  |
| <i>circSLAIN1</i> | miR-3074-5p                                  | 5  |
| <i>circSLAIN1</i> | miR-30b-3p/1273h-5p/3689-3p/6779-5p/6780a-5p | 6  |
| <i>circSLAIN1</i> | miR-30c-3p/6788-5p                           | 3  |
| <i>circSLAIN1</i> | miR-31-5p                                    | 1  |
| <i>circSLAIN1</i> | miR-3117-3p                                  | 2  |
| <i>circSLAIN1</i> | miR-3120-5p                                  | 1  |
| <i>circSLAIN1</i> | miR-3123                                     | 5  |

|                   |                       |    |
|-------------------|-----------------------|----|
| <i>circSLAIN1</i> | miR-3126-3p           | 3  |
| <i>circSLAIN1</i> | miR-3126-5p           | 1  |
| <i>circSLAIN1</i> | miR-3127-5p           | 1  |
| <i>circSLAIN1</i> | miR-3133              | 1  |
| <i>circSLAIN1</i> | miR-3135b             | 4  |
| <i>circSLAIN1</i> | miR-3136-5p/4439      | 7  |
| <i>circSLAIN1</i> | miR-3140-3p           | 5  |
| <i>circSLAIN1</i> | miR-3140-5p           | 6  |
| <i>circSLAIN1</i> | miR-3144-3p           | 1  |
| <i>circSLAIN1</i> | miR-3144-5p           | 4  |
| <i>circSLAIN1</i> | miR-3145-5p           | 3  |
| <i>circSLAIN1</i> | miR-3147              | 2  |
| <i>circSLAIN1</i> | miR-3148              | 5  |
| <i>circSLAIN1</i> | miR-3150a-3p          | 12 |
| <i>circSLAIN1</i> | miR-3150a-5p/3150b-5p | 1  |
| <i>circSLAIN1</i> | miR-3151-3p           | 3  |
| <i>circSLAIN1</i> | miR-3151-5p           | 4  |
| <i>circSLAIN1</i> | miR-3152-3p           | 4  |
| <i>circSLAIN1</i> | miR-3152-5p           | 7  |
| <i>circSLAIN1</i> | miR-3158-3p           | 2  |
| <i>circSLAIN1</i> | miR-3163              | 1  |
| <i>circSLAIN1</i> | miR-3164              | 3  |
| <i>circSLAIN1</i> | miR-3166              | 2  |
| <i>circSLAIN1</i> | miR-3168              | 3  |
| <i>circSLAIN1</i> | miR-3169              | 2  |
| <i>circSLAIN1</i> | miR-3173-3p/6891-5p   | 1  |
| <i>circSLAIN1</i> | miR-3174              | 4  |
| <i>circSLAIN1</i> | miR-3175              | 4  |
| <i>circSLAIN1</i> | miR-3180-5p           | 5  |
| <i>circSLAIN1</i> | miR-3184-3p           | 4  |
| <i>circSLAIN1</i> | miR-3185              | 1  |
| <i>circSLAIN1</i> | miR-3188              | 4  |
| <i>circSLAIN1</i> | miR-3190-3p           | 2  |
| <i>circSLAIN1</i> | miR-3191-3p           | 4  |
| <i>circSLAIN1</i> | miR-3191-5p           | 1  |
| <i>circSLAIN1</i> | miR-3192-3p           | 2  |
| <i>circSLAIN1</i> | miR-3192-5p           | 6  |
| <i>circSLAIN1</i> | miR-3198/4309         | 2  |

|                   |                     |    |
|-------------------|---------------------|----|
| <i>circSLAIN1</i> | miR-3199/8052       | 4  |
| <i>circSLAIN1</i> | miR-320             | 1  |
| <i>circSLAIN1</i> | miR-3200-3p         | 2  |
| <i>circSLAIN1</i> | miR-3200-5p         | 3  |
| <i>circSLAIN1</i> | miR-320e            | 3  |
| <i>circSLAIN1</i> | miR-323-3p          | 1  |
| <i>circSLAIN1</i> | miR-323a-5p         | 4  |
| <i>circSLAIN1</i> | miR-323b-3p         | 3  |
| <i>circSLAIN1</i> | miR-329-3p/362-3p   | 11 |
| <i>circSLAIN1</i> | miR-329-5p          | 3  |
| <i>circSLAIN1</i> | miR-330-3p          | 1  |
| <i>circSLAIN1</i> | miR-330-3p.2        | 4  |
| <i>circSLAIN1</i> | miR-331-3p          | 4  |
| <i>circSLAIN1</i> | miR-331-5p          | 3  |
| <i>circSLAIN1</i> | miR-335-3p          | 4  |
| <i>circSLAIN1</i> | miR-337-3p          | 2  |
| <i>circSLAIN1</i> | miR-34-5p/449-5p    | 3  |
| <i>circSLAIN1</i> | miR-342-3p          | 3  |
| <i>circSLAIN1</i> | miR-345-3p          | 6  |
| <i>circSLAIN1</i> | miR-346             | 1  |
| <i>circSLAIN1</i> | miR-34b-3p          | 6  |
| <i>circSLAIN1</i> | miR-34b-5p/449c-5p  | 1  |
| <i>circSLAIN1</i> | miR-34c-3p          | 6  |
| <i>circSLAIN1</i> | miR-3591-5p         | 1  |
| <i>circSLAIN1</i> | miR-3610            | 4  |
| <i>circSLAIN1</i> | miR-3611            | 4  |
| <i>circSLAIN1</i> | miR-3614-5p         | 1  |
| <i>circSLAIN1</i> | miR-3618            | 1  |
| <i>circSLAIN1</i> | miR-3646            | 5  |
| <i>circSLAIN1</i> | miR-365-3p          | 3  |
| <i>circSLAIN1</i> | miR-3654            | 5  |
| <i>circSLAIN1</i> | miR-3658            | 1  |
| <i>circSLAIN1</i> | miR-365a-5p/365b-5p | 4  |
| <i>circSLAIN1</i> | miR-3664-3p         | 2  |
| <i>circSLAIN1</i> | miR-3667-5p         | 3  |
| <i>circSLAIN1</i> | miR-3668            | 4  |
| <i>circSLAIN1</i> | miR-367-5p          | 3  |
| <i>circSLAIN1</i> | miR-3671            | 6  |



|                   |                     |    |
|-------------------|---------------------|----|
| <i>circSLAIN1</i> | miR-3672/6864-3p    | 5  |
| <i>circSLAIN1</i> | miR-3675-3p         | 3  |
| <i>circSLAIN1</i> | miR-3675-5p         | 4  |
| <i>circSLAIN1</i> | miR-3678-3p         | 2  |
| <i>circSLAIN1</i> | miR-3681-5p         | 1  |
| <i>circSLAIN1</i> | miR-3682-3p         | 2  |
| <i>circSLAIN1</i> | miR-3685            | 1  |
| <i>circSLAIN1</i> | miR-3688-5p         | 4  |
| <i>circSLAIN1</i> | miR-369-3p          | 4  |
| <i>circSLAIN1</i> | miR-3690            | 4  |
| <i>circSLAIN1</i> | miR-3691-3p         | 1  |
| <i>circSLAIN1</i> | miR-3692-5p         | 3  |
| <i>circSLAIN1</i> | miR-374-5p          | 1  |
| <i>circSLAIN1</i> | miR-374-5p/655-3p   | 3  |
| <i>circSLAIN1</i> | miR-377-5p/6086     | 3  |
| <i>circSLAIN1</i> | miR-378a-5p         | 5  |
| <i>circSLAIN1</i> | miR-380-3p          | 4  |
| <i>circSLAIN1</i> | miR-383-3p          | 1  |
| <i>circSLAIN1</i> | miR-383-5p.2        | 1  |
| <i>circSLAIN1</i> | miR-384             | 1  |
| <i>circSLAIN1</i> | miR-3921/4653-5p    | 2  |
| <i>circSLAIN1</i> | miR-3923            | 1  |
| <i>circSLAIN1</i> | miR-3924            | 4  |
| <i>circSLAIN1</i> | miR-3925-3p         | 10 |
| <i>circSLAIN1</i> | miR-3925-5p         | 5  |
| <i>circSLAIN1</i> | miR-3927-3p/6831-5p | 3  |
| <i>circSLAIN1</i> | miR-3928-5p/6806-3p | 3  |
| <i>circSLAIN1</i> | miR-3929/4419b/4478 | 4  |
| <i>circSLAIN1</i> | miR-3934-5p         | 3  |
| <i>circSLAIN1</i> | miR-3935            | 1  |
| <i>circSLAIN1</i> | miR-3936            | 4  |
| <i>circSLAIN1</i> | miR-3940-5p/4507    | 2  |
| <i>circSLAIN1</i> | miR-3943            | 4  |
| <i>circSLAIN1</i> | miR-3944-5p         | 1  |
| <i>circSLAIN1</i> | miR-3973            | 4  |
| <i>circSLAIN1</i> | miR-3975            | 4  |
| <i>circSLAIN1</i> | miR-3977            | 2  |
| <i>circSLAIN1</i> | miR-3978            | 5  |

|                   |                                    |   |
|-------------------|------------------------------------|---|
| <i>circSLAIN1</i> | miR-411-3p                         | 1 |
| <i>circSLAIN1</i> | miR-411-5p.1                       | 6 |
| <i>circSLAIN1</i> | miR-421                            | 1 |
| <i>circSLAIN1</i> | miR-425-5p                         | 5 |
| <i>circSLAIN1</i> | miR-4251                           | 5 |
| <i>circSLAIN1</i> | miR-4254                           | 4 |
| <i>circSLAIN1</i> | miR-4259                           | 2 |
| <i>circSLAIN1</i> | miR-4261                           | 1 |
| <i>circSLAIN1</i> | miR-4263                           | 1 |
| <i>circSLAIN1</i> | miR-4268                           | 3 |
| <i>circSLAIN1</i> | miR-4269/6715b-5p                  | 1 |
| <i>circSLAIN1</i> | miR-4270/4441/6754-5p              | 3 |
| <i>circSLAIN1</i> | miR-4271/4725-3p/6780b-5p          | 8 |
| <i>circSLAIN1</i> | miR-4272                           | 4 |
| <i>circSLAIN1</i> | miR-4273/7156-5p                   | 3 |
| <i>circSLAIN1</i> | miR-4274                           | 1 |
| <i>circSLAIN1</i> | miR-4275                           | 1 |
| <i>circSLAIN1</i> | miR-4276                           | 3 |
| <i>circSLAIN1</i> | miR-4277                           | 4 |
| <i>circSLAIN1</i> | miR-4278                           | 3 |
| <i>circSLAIN1</i> | miR-4280                           | 4 |
| <i>circSLAIN1</i> | miR-4282                           | 5 |
| <i>circSLAIN1</i> | miR-4283                           | 3 |
| <i>circSLAIN1</i> | miR-4292/6791-5p                   | 4 |
| <i>circSLAIN1</i> | miR-4294                           | 1 |
| <i>circSLAIN1</i> | miR-4308                           | 4 |
| <i>circSLAIN1</i> | miR-431-5p                         | 7 |
| <i>circSLAIN1</i> | miR-4311                           | 1 |
| <i>circSLAIN1</i> | miR-4316                           | 4 |
| <i>circSLAIN1</i> | miR-4317                           | 2 |
| <i>circSLAIN1</i> | miR-432-5p                         | 4 |
| <i>circSLAIN1</i> | miR-4323                           | 4 |
| <i>circSLAIN1</i> | miR-4324                           | 5 |
| <i>circSLAIN1</i> | miR-4325                           | 4 |
| <i>circSLAIN1</i> | miR-4326                           | 4 |
| <i>circSLAIN1</i> | miR-4329                           | 5 |
| <i>circSLAIN1</i> | miR-4419a/4510/6127/6129/6130/6133 | 1 |
| <i>circSLAIN1</i> | miR-4422                           | 4 |

|                   |                     |   |
|-------------------|---------------------|---|
| <i>circSLAIN1</i> | miR-4423-3p         | 4 |
| <i>circSLAIN1</i> | miR-4425            | 2 |
| <i>circSLAIN1</i> | miR-4426/4647/4662b | 1 |
| <i>circSLAIN1</i> | miR-4427            | 1 |
| <i>circSLAIN1</i> | miR-4428            | 1 |
| <i>circSLAIN1</i> | miR-4432            | 1 |
| <i>circSLAIN1</i> | miR-4433a-3p        | 2 |
| <i>circSLAIN1</i> | miR-4433b-3p        | 3 |
| <i>circSLAIN1</i> | miR-4433b-5p        | 5 |
| <i>circSLAIN1</i> | miR-4434/4516/5703  | 6 |
| <i>circSLAIN1</i> | miR-4436b-5p        | 1 |
| <i>circSLAIN1</i> | miR-4437            | 3 |
| <i>circSLAIN1</i> | miR-4446-3p         | 2 |
| <i>circSLAIN1</i> | miR-4446-5p         | 4 |
| <i>circSLAIN1</i> | miR-4447/4472       | 4 |
| <i>circSLAIN1</i> | miR-4448            | 3 |
| <i>circSLAIN1</i> | miR-4452            | 1 |
| <i>circSLAIN1</i> | miR-4459            | 2 |
| <i>circSLAIN1</i> | miR-4460            | 1 |
| <i>circSLAIN1</i> | miR-4461            | 1 |
| <i>circSLAIN1</i> | miR-4463            | 6 |
| <i>circSLAIN1</i> | miR-4464/4748       | 3 |
| <i>circSLAIN1</i> | miR-4468            | 1 |
| <i>circSLAIN1</i> | miR-4470            | 5 |
| <i>circSLAIN1</i> | miR-4471/8059       | 9 |
| <i>circSLAIN1</i> | miR-4473            | 1 |
| <i>circSLAIN1</i> | miR-4477a           | 3 |
| <i>circSLAIN1</i> | miR-448             | 1 |
| <i>circSLAIN1</i> | miR-4481/4745-5p    | 4 |
| <i>circSLAIN1</i> | miR-4482-3p         | 7 |
| <i>circSLAIN1</i> | miR-4489            | 3 |
| <i>circSLAIN1</i> | miR-4490            | 3 |
| <i>circSLAIN1</i> | miR-4491/4657       | 1 |
| <i>circSLAIN1</i> | miR-4494            | 5 |
| <i>circSLAIN1</i> | miR-4496            | 6 |
| <i>circSLAIN1</i> | miR-4499            | 6 |
| <i>circSLAIN1</i> | miR-449c-3p         | 2 |
| <i>circSLAIN1</i> | miR-4502            | 1 |

|                   |                          |   |
|-------------------|--------------------------|---|
| <i>circSLAIN1</i> | miR-4503                 | 5 |
| <i>circSLAIN1</i> | miR-4506                 | 4 |
| <i>circSLAIN1</i> | miR-4509                 | 3 |
| <i>circSLAIN1</i> | miR-4511                 | 2 |
| <i>circSLAIN1</i> | miR-4513/6855-3p         | 4 |
| <i>circSLAIN1</i> | miR-4514/4692            | 1 |
| <i>circSLAIN1</i> | miR-4515                 | 4 |
| <i>circSLAIN1</i> | miR-4519                 | 1 |
| <i>circSLAIN1</i> | miR-451b                 | 4 |
| <i>circSLAIN1</i> | miR-452-5p/892-3p        | 3 |
| <i>circSLAIN1</i> | miR-4524a-3p             | 2 |
| <i>circSLAIN1</i> | miR-4524b-3p             | 2 |
| <i>circSLAIN1</i> | miR-4531                 | 9 |
| <i>circSLAIN1</i> | miR-4539                 | 9 |
| <i>circSLAIN1</i> | miR-454-5p               | 2 |
| <i>circSLAIN1</i> | miR-4639-3p              | 1 |
| <i>circSLAIN1</i> | miR-4639-5p              | 2 |
| <i>circSLAIN1</i> | miR-4643                 | 2 |
| <i>circSLAIN1</i> | miR-4645-3p              | 2 |
| <i>circSLAIN1</i> | miR-4645-5p/4673         | 1 |
| <i>circSLAIN1</i> | miR-4649-3p              | 4 |
| <i>circSLAIN1</i> | miR-4652-5p              | 4 |
| <i>circSLAIN1</i> | miR-4653-3p              | 4 |
| <i>circSLAIN1</i> | miR-4656                 | 2 |
| <i>circSLAIN1</i> | miR-4658/6790-5p         | 4 |
| <i>circSLAIN1</i> | miR-4659a-3p/4659b-3p    | 5 |
| <i>circSLAIN1</i> | miR-4659a-5p/4659b-5p    | 2 |
| <i>circSLAIN1</i> | miR-4660                 | 5 |
| <i>circSLAIN1</i> | miR-4661-3p              | 1 |
| <i>circSLAIN1</i> | miR-4663                 | 6 |
| <i>circSLAIN1</i> | miR-4666a-5p             | 5 |
| <i>circSLAIN1</i> | miR-4666b                | 1 |
| <i>circSLAIN1</i> | miR-4667-5p/4700-5p/8089 | 7 |
| <i>circSLAIN1</i> | miR-4670-3p              | 1 |
| <i>circSLAIN1</i> | miR-4671-3p              | 1 |
| <i>circSLAIN1</i> | miR-4674                 | 2 |
| <i>circSLAIN1</i> | miR-4675/4741            | 2 |
| <i>circSLAIN1</i> | miR-4677-3p              | 4 |

|                   |                     |    |
|-------------------|---------------------|----|
| <i>circSLAIN1</i> | miR-4677-5p         | 3  |
| <i>circSLAIN1</i> | miR-4679            | 4  |
| <i>circSLAIN1</i> | miR-4680-3p         | 1  |
| <i>circSLAIN1</i> | miR-4680-5p         | 5  |
| <i>circSLAIN1</i> | miR-4682            | 6  |
| <i>circSLAIN1</i> | miR-4683            | 4  |
| <i>circSLAIN1</i> | miR-4684-5p         | 3  |
| <i>circSLAIN1</i> | miR-4691-5p/6792-3p | 12 |
| <i>circSLAIN1</i> | miR-4693-5p         | 3  |
| <i>circSLAIN1</i> | miR-4694-5p         | 4  |
| <i>circSLAIN1</i> | miR-4700-3p         | 2  |
| <i>circSLAIN1</i> | miR-4704-5p         | 6  |
| <i>circSLAIN1</i> | miR-4708-3p         | 1  |
| <i>circSLAIN1</i> | miR-4709-3p         | 1  |
| <i>circSLAIN1</i> | miR-4709-5p         | 2  |
| <i>circSLAIN1</i> | miR-4715-5p         | 2  |
| <i>circSLAIN1</i> | miR-4717-3p         | 3  |
| <i>circSLAIN1</i> | miR-4719            | 1  |
| <i>circSLAIN1</i> | miR-4724-3p         | 1  |
| <i>circSLAIN1</i> | miR-4724-5p         | 1  |
| <i>circSLAIN1</i> | miR-4727-3p         | 1  |
| <i>circSLAIN1</i> | miR-4727-5p         | 1  |
| <i>circSLAIN1</i> | miR-4728-3p         | 9  |
| <i>circSLAIN1</i> | miR-4729            | 1  |
| <i>circSLAIN1</i> | miR-4731-5p         | 3  |
| <i>circSLAIN1</i> | miR-4733-5p         | 3  |
| <i>circSLAIN1</i> | miR-4740-5p         | 4  |
| <i>circSLAIN1</i> | miR-4742-3p         | 7  |
| <i>circSLAIN1</i> | miR-4742-5p         | 1  |
| <i>circSLAIN1</i> | miR-4744            | 3  |
| <i>circSLAIN1</i> | miR-4747-5p/5196-5p | 1  |
| <i>circSLAIN1</i> | miR-4749-3p         | 4  |
| <i>circSLAIN1</i> | miR-4752            | 1  |
| <i>circSLAIN1</i> | miR-4753-3p         | 4  |
| <i>circSLAIN1</i> | miR-4755-3p         | 1  |
| <i>circSLAIN1</i> | miR-4759            | 2  |
| <i>circSLAIN1</i> | miR-4760-3p         | 1  |
| <i>circSLAIN1</i> | miR-4762-3p         | 4  |

|                   |                     |   |
|-------------------|---------------------|---|
| <i>circSLAIN1</i> | miR-4768-3p         | 2 |
| <i>circSLAIN1</i> | miR-4768-5p/6833-3p | 5 |
| <i>circSLAIN1</i> | miR-4771            | 2 |
| <i>circSLAIN1</i> | miR-4772-3p         | 1 |
| <i>circSLAIN1</i> | miR-4773            | 5 |
| <i>circSLAIN1</i> | miR-4774-3p         | 7 |
| <i>circSLAIN1</i> | miR-4774-5p         | 3 |
| <i>circSLAIN1</i> | miR-4775            | 4 |
| <i>circSLAIN1</i> | miR-4776-3p         | 1 |
| <i>circSLAIN1</i> | miR-4778-3p         | 5 |
| <i>circSLAIN1</i> | miR-4778-5p         | 4 |
| <i>circSLAIN1</i> | miR-4782-5p/5706    | 3 |
| <i>circSLAIN1</i> | miR-4786-3p         | 1 |
| <i>circSLAIN1</i> | miR-4786-5p         | 1 |
| <i>circSLAIN1</i> | miR-4789-3p         | 2 |
| <i>circSLAIN1</i> | miR-4790-3p         | 4 |
| <i>circSLAIN1</i> | miR-4793-5p         | 9 |
| <i>circSLAIN1</i> | miR-4795-3p         | 3 |
| <i>circSLAIN1</i> | miR-4795-5p         | 4 |
| <i>circSLAIN1</i> | miR-4796-5p         | 1 |
| <i>circSLAIN1</i> | miR-4799-5p         | 2 |
| <i>circSLAIN1</i> | miR-4802-5p         | 4 |
| <i>circSLAIN1</i> | miR-483-3p.2        | 4 |
| <i>circSLAIN1</i> | miR-485-5p          | 4 |
| <i>circSLAIN1</i> | miR-486-5p          | 5 |
| <i>circSLAIN1</i> | miR-487a-5p/487b-5p | 4 |
| <i>circSLAIN1</i> | miR-488-3p          | 1 |
| <i>circSLAIN1</i> | miR-489-3p          | 1 |
| <i>circSLAIN1</i> | miR-490-3p          | 1 |
| <i>circSLAIN1</i> | miR-490-5p          | 3 |
| <i>circSLAIN1</i> | miR-491-5p          | 4 |
| <i>circSLAIN1</i> | miR-496.1           | 3 |
| <i>circSLAIN1</i> | miR-496.2           | 3 |
| <i>circSLAIN1</i> | miR-4999-3p         | 8 |
| <i>circSLAIN1</i> | miR-499a-3p/499b-3p | 3 |
| <i>circSLAIN1</i> | miR-499b-5p         | 5 |
| <i>circSLAIN1</i> | miR-5000-3p         | 2 |
| <i>circSLAIN1</i> | miR-5001-3p         | 1 |

|                   |                             |   |
|-------------------|-----------------------------|---|
| <i>circSLAIN1</i> | miR-5002-3p                 | 3 |
| <i>circSLAIN1</i> | miR-5002-5p                 | 3 |
| <i>circSLAIN1</i> | miR-5003-3p                 | 1 |
| <i>circSLAIN1</i> | miR-5006-5p                 | 1 |
| <i>circSLAIN1</i> | miR-5007-3p                 | 5 |
| <i>circSLAIN1</i> | miR-501-3p/502-3p           | 4 |
| <i>circSLAIN1</i> | miR-5010-3p                 | 3 |
| <i>circSLAIN1</i> | miR-5011-3p                 | 1 |
| <i>circSLAIN1</i> | miR-503-5p                  | 5 |
| <i>circSLAIN1</i> | miR-505-3p.1                | 4 |
| <i>circSLAIN1</i> | miR-505-3p.2                | 1 |
| <i>circSLAIN1</i> | miR-505-5p                  | 8 |
| <i>circSLAIN1</i> | miR-508-5p                  | 3 |
| <i>circSLAIN1</i> | miR-5088-5p                 | 2 |
| <i>circSLAIN1</i> | miR-5089-3p                 | 3 |
| <i>circSLAIN1</i> | miR-509-3-5p/509-5p/4418    | 2 |
| <i>circSLAIN1</i> | miR-5093                    | 1 |
| <i>circSLAIN1</i> | miR-5094                    | 3 |
| <i>circSLAIN1</i> | miR-510-5p                  | 1 |
| <i>circSLAIN1</i> | miR-511-5p                  | 5 |
| <i>circSLAIN1</i> | miR-512-3p                  | 1 |
| <i>circSLAIN1</i> | miR-512-5p                  | 4 |
| <i>circSLAIN1</i> | miR-513c-5p/514b-5p         | 1 |
| <i>circSLAIN1</i> | miR-514a-3p                 | 1 |
| <i>circSLAIN1</i> | miR-515-5p/519e-5p          | 2 |
| <i>circSLAIN1</i> | miR-516a-3p/516b-3p/7162-5p | 2 |
| <i>circSLAIN1</i> | miR-516b-5p                 | 3 |
| <i>circSLAIN1</i> | miR-5187-3p                 | 1 |
| <i>circSLAIN1</i> | miR-5188                    | 4 |
| <i>circSLAIN1</i> | miR-5189-3p                 | 1 |
| <i>circSLAIN1</i> | miR-518a-5p/527             | 1 |
| <i>circSLAIN1</i> | miR-5190                    | 4 |
| <i>circSLAIN1</i> | miR-5192                    | 1 |
| <i>circSLAIN1</i> | miR-5193                    | 3 |
| <i>circSLAIN1</i> | miR-5196-3p                 | 9 |
| <i>circSLAIN1</i> | miR-5197-3p                 | 1 |
| <i>circSLAIN1</i> | miR-519d-5p                 | 4 |
| <i>circSLAIN1</i> | miR-520g-3p                 | 4 |

|                   |                                                                  |    |
|-------------------|------------------------------------------------------------------|----|
| <i>circSLAIN1</i> | miR-524-5p                                                       | 5  |
| <i>circSLAIN1</i> | miR-525-5p                                                       | 8  |
| <i>circSLAIN1</i> | miR-526b-5p                                                      | 11 |
| <i>circSLAIN1</i> | miR-532-5p                                                       | 2  |
| <i>circSLAIN1</i> | miR-539-5p                                                       | 5  |
| <i>circSLAIN1</i> | miR-541-5p                                                       | 1  |
| <i>circSLAIN1</i> | miR-544b                                                         | 5  |
| <i>circSLAIN1</i> | miR-545-3p                                                       | 1  |
| <i>circSLAIN1</i> | miR-548ao-3p                                                     | 3  |
| <i>circSLAIN1</i> | miR-548ao-5p/548ax                                               | 9  |
| <i>circSLAIN1</i> | miR-548at-5p                                                     | 3  |
| <i>circSLAIN1</i> | miR-548au-3p                                                     | 3  |
| <i>circSLAIN1</i> | miR-548av-5p/548k/8054                                           | 1  |
| <i>circSLAIN1</i> | miR-548aw                                                        | 1  |
| <i>circSLAIN1</i> | miR-548ay-5p/548au-5p/548as-5p/548ar-5p/548aq-5p/548ap-5p/548am- | 5  |
| <i>circSLAIN1</i> | miR-548b-3p                                                      | 2  |
| <i>circSLAIN1</i> | miR-548c-3p                                                      | 4  |
| <i>circSLAIN1</i> | miR-548e-5p                                                      | 3  |
| <i>circSLAIN1</i> | miR-548l                                                         | 1  |
| <i>circSLAIN1</i> | miR-548u/7161-5p                                                 | 3  |
| <i>circSLAIN1</i> | miR-548v                                                         | 1  |
| <i>circSLAIN1</i> | miR-554                                                          | 1  |
| <i>circSLAIN1</i> | miR-556-3p                                                       | 1  |
| <i>circSLAIN1</i> | miR-5571-5p                                                      | 7  |
| <i>circSLAIN1</i> | miR-5584-3p                                                      | 3  |
| <i>circSLAIN1</i> | miR-5584-5p                                                      | 3  |
| <i>circSLAIN1</i> | miR-5585-3p                                                      | 3  |
| <i>circSLAIN1</i> | miR-5585-5p                                                      | 9  |
| <i>circSLAIN1</i> | miR-5587-5p                                                      | 5  |
| <i>circSLAIN1</i> | miR-5589-3p                                                      | 1  |
| <i>circSLAIN1</i> | miR-5589-5p                                                      | 3  |
| <i>circSLAIN1</i> | miR-5590-5p                                                      | 2  |
| <i>circSLAIN1</i> | miR-5591-3p                                                      | 1  |
| <i>circSLAIN1</i> | miR-561-3p                                                       | 3  |
| <i>circSLAIN1</i> | miR-562                                                          | 5  |
| <i>circSLAIN1</i> | miR-567                                                          | 1  |
| <i>circSLAIN1</i> | miR-568                                                          | 2  |
| <i>circSLAIN1</i> | miR-5680                                                         | 1  |



|                   |                  |    |
|-------------------|------------------|----|
| <i>circSLAIN1</i> | miR-5681a        | 4  |
| <i>circSLAIN1</i> | miR-5683         | 7  |
| <i>circSLAIN1</i> | miR-569          | 3  |
| <i>circSLAIN1</i> | miR-5690         | 1  |
| <i>circSLAIN1</i> | miR-5692bc       | 4  |
| <i>circSLAIN1</i> | miR-5693         | 3  |
| <i>circSLAIN1</i> | miR-5694         | 1  |
| <i>circSLAIN1</i> | miR-5695         | 4  |
| <i>circSLAIN1</i> | miR-5696         | 1  |
| <i>circSLAIN1</i> | miR-5700         | 3  |
| <i>circSLAIN1</i> | miR-5702         | 2  |
| <i>circSLAIN1</i> | miR-5704         | 1  |
| <i>circSLAIN1</i> | miR-571          | 2  |
| <i>circSLAIN1</i> | miR-573/3616-5p  | 9  |
| <i>circSLAIN1</i> | miR-575/4676-5p  | 5  |
| <i>circSLAIN1</i> | miR-576-5p       | 1  |
| <i>circSLAIN1</i> | miR-578          | 8  |
| <i>circSLAIN1</i> | miR-579-3p       | 1  |
| <i>circSLAIN1</i> | miR-580-5p       | 4  |
| <i>circSLAIN1</i> | miR-582-3p       | 2  |
| <i>circSLAIN1</i> | miR-583          | 1  |
| <i>circSLAIN1</i> | miR-586          | 1  |
| <i>circSLAIN1</i> | miR-587          | 3  |
| <i>circSLAIN1</i> | miR-589-3p       | 5  |
| <i>circSLAIN1</i> | miR-590-3p       | 1  |
| <i>circSLAIN1</i> | miR-592          | 1  |
| <i>circSLAIN1</i> | miR-595          | 5  |
| <i>circSLAIN1</i> | miR-599          | 1  |
| <i>circSLAIN1</i> | miR-603          | 11 |
| <i>circSLAIN1</i> | miR-6069         | 4  |
| <i>circSLAIN1</i> | miR-607          | 4  |
| <i>circSLAIN1</i> | miR-6071         | 1  |
| <i>circSLAIN1</i> | miR-6072/6891-3p | 1  |
| <i>circSLAIN1</i> | miR-6074         | 6  |
| <i>circSLAIN1</i> | miR-6077         | 6  |
| <i>circSLAIN1</i> | miR-6079         | 10 |
| <i>circSLAIN1</i> | miR-6080         | 1  |
| <i>circSLAIN1</i> | miR-6083         | 3  |

|                   |                    |   |
|-------------------|--------------------|---|
| <i>circSLAIN1</i> | miR-6084           | 1 |
| <i>circSLAIN1</i> | miR-6090           | 4 |
| <i>circSLAIN1</i> | miR-6124           | 5 |
| <i>circSLAIN1</i> | miR-6126           | 3 |
| <i>circSLAIN1</i> | miR-6128           | 9 |
| <i>circSLAIN1</i> | miR-6131           | 3 |
| <i>circSLAIN1</i> | miR-6134           | 7 |
| <i>circSLAIN1</i> | miR-618            | 2 |
| <i>circSLAIN1</i> | miR-619-5p/6506-5p | 6 |
| <i>circSLAIN1</i> | miR-622            | 3 |
| <i>circSLAIN1</i> | miR-623            | 5 |
| <i>circSLAIN1</i> | miR-625-3p         | 2 |
| <i>circSLAIN1</i> | miR-627-3p         | 6 |
| <i>circSLAIN1</i> | miR-627-5p         | 3 |
| <i>circSLAIN1</i> | miR-628-5p         | 7 |
| <i>circSLAIN1</i> | miR-632/4288       | 1 |
| <i>circSLAIN1</i> | miR-637            | 7 |
| <i>circSLAIN1</i> | miR-639            | 2 |
| <i>circSLAIN1</i> | miR-642-3p         | 5 |
| <i>circSLAIN1</i> | miR-645            | 2 |
| <i>circSLAIN1</i> | miR-646            | 5 |
| <i>circSLAIN1</i> | miR-648            | 1 |
| <i>circSLAIN1</i> | miR-649            | 1 |
| <i>circSLAIN1</i> | miR-6500-3p        | 1 |
| <i>circSLAIN1</i> | miR-6502-3p        | 4 |
| <i>circSLAIN1</i> | miR-6503-3p        | 2 |
| <i>circSLAIN1</i> | miR-6504-3p        | 2 |
| <i>circSLAIN1</i> | miR-6507-3p        | 4 |
| <i>circSLAIN1</i> | miR-6509-3p        | 1 |
| <i>circSLAIN1</i> | miR-651-3p         | 6 |
| <i>circSLAIN1</i> | miR-6513-3p        | 1 |
| <i>circSLAIN1</i> | miR-6514-3p        | 8 |
| <i>circSLAIN1</i> | miR-6514-5p        | 4 |
| <i>circSLAIN1</i> | miR-6515-3p        | 9 |
| <i>circSLAIN1</i> | miR-6516-5p        | 2 |
| <i>circSLAIN1</i> | miR-653-3p         | 4 |
| <i>circSLAIN1</i> | miR-654-3p         | 7 |
| <i>circSLAIN1</i> | miR-655-5p         | 3 |

|                   |                     |    |
|-------------------|---------------------|----|
| <i>circSLAIN1</i> | miR-656-3p          | 1  |
| <i>circSLAIN1</i> | miR-656-5p          | 2  |
| <i>circSLAIN1</i> | miR-659-3p          | 2  |
| <i>circSLAIN1</i> | miR-660-3p          | 3  |
| <i>circSLAIN1</i> | miR-670-3p          | 9  |
| <i>circSLAIN1</i> | miR-671-5p          | 1  |
| <i>circSLAIN1</i> | miR-6716-5p         | 4  |
| <i>circSLAIN1</i> | miR-6728-3p         | 1  |
| <i>circSLAIN1</i> | miR-6730-5p         | 4  |
| <i>circSLAIN1</i> | miR-6736-3p         | 5  |
| <i>circSLAIN1</i> | miR-6740-5p         | 2  |
| <i>circSLAIN1</i> | miR-6742-5p         | 4  |
| <i>circSLAIN1</i> | miR-6749-3p         | 12 |
| <i>circSLAIN1</i> | miR-6750-3p         | 5  |
| <i>circSLAIN1</i> | miR-6750-5p/6822-5p | 3  |
| <i>circSLAIN1</i> | miR-6757-3p         | 5  |
| <i>circSLAIN1</i> | miR-6757-5p         | 1  |
| <i>circSLAIN1</i> | miR-6758-3p         | 4  |
| <i>circSLAIN1</i> | miR-676-5p          | 5  |
| <i>circSLAIN1</i> | miR-6760-3p         | 4  |
| <i>circSLAIN1</i> | miR-6761-5p         | 5  |
| <i>circSLAIN1</i> | miR-6765-5p         | 1  |
| <i>circSLAIN1</i> | miR-6768-5p         | 4  |
| <i>circSLAIN1</i> | miR-6769a-3p        | 4  |
| <i>circSLAIN1</i> | miR-6770-5p         | 4  |
| <i>circSLAIN1</i> | miR-6772-3p         | 2  |
| <i>circSLAIN1</i> | miR-6776-3p         | 1  |
| <i>circSLAIN1</i> | miR-6777-3p         | 1  |
| <i>circSLAIN1</i> | miR-6780a-3p        | 9  |
| <i>circSLAIN1</i> | miR-6782-5p         | 3  |
| <i>circSLAIN1</i> | miR-6783-5p         | 4  |
| <i>circSLAIN1</i> | miR-6787-3p         | 4  |
| <i>circSLAIN1</i> | miR-6789-5p         | 3  |
| <i>circSLAIN1</i> | miR-6790-3p         | 1  |
| <i>circSLAIN1</i> | miR-6792-5p         | 5  |
| <i>circSLAIN1</i> | miR-6795-3p         | 1  |
| <i>circSLAIN1</i> | miR-6801-3p/6810-3p | 4  |
| <i>circSLAIN1</i> | miR-6808-3p         | 3  |

|                   |                     |    |
|-------------------|---------------------|----|
| <i>circSLAIN1</i> | miR-6809-3p         | 5  |
| <i>circSLAIN1</i> | miR-6809-5p         | 1  |
| <i>circSLAIN1</i> | miR-6810-5p         | 12 |
| <i>circSLAIN1</i> | miR-6811-3p         | 2  |
| <i>circSLAIN1</i> | miR-6813-3p         | 2  |
| <i>circSLAIN1</i> | miR-6815-5p/6865-5p | 4  |
| <i>circSLAIN1</i> | miR-6819-3p/6877-3p | 1  |
| <i>circSLAIN1</i> | miR-6821-3p         | 1  |
| <i>circSLAIN1</i> | miR-6824-5p         | 3  |
| <i>circSLAIN1</i> | miR-6825-5p         | 4  |
| <i>circSLAIN1</i> | miR-6826-5p         | 3  |
| <i>circSLAIN1</i> | miR-6827-5p         | 3  |
| <i>circSLAIN1</i> | miR-6828-3p         | 1  |
| <i>circSLAIN1</i> | miR-6828-5p         | 1  |
| <i>circSLAIN1</i> | miR-6829-5p         | 2  |
| <i>circSLAIN1</i> | miR-6830-3p         | 1  |
| <i>circSLAIN1</i> | miR-6830-5p         | 1  |
| <i>circSLAIN1</i> | miR-6832-3p         | 5  |
| <i>circSLAIN1</i> | miR-6833-5p         | 1  |
| <i>circSLAIN1</i> | miR-6834-3p         | 5  |
| <i>circSLAIN1</i> | miR-6839-3p         | 2  |
| <i>circSLAIN1</i> | miR-6841-3p         | 2  |
| <i>circSLAIN1</i> | miR-6844            | 8  |
| <i>circSLAIN1</i> | miR-6845-3p         | 1  |
| <i>circSLAIN1</i> | miR-6854-5p         | 4  |
| <i>circSLAIN1</i> | miR-6857-3p         | 4  |
| <i>circSLAIN1</i> | miR-6857-5p         | 12 |
| <i>circSLAIN1</i> | miR-6858-3p         | 5  |
| <i>circSLAIN1</i> | miR-6864-5p         | 3  |
| <i>circSLAIN1</i> | miR-6868-3p         | 4  |
| <i>circSLAIN1</i> | miR-6873-5p         | 1  |
| <i>circSLAIN1</i> | miR-6875-3p         | 5  |
| <i>circSLAIN1</i> | miR-6881-3p         | 9  |
| <i>circSLAIN1</i> | miR-6885-3p         | 2  |
| <i>circSLAIN1</i> | miR-6887-3p         | 1  |
| <i>circSLAIN1</i> | miR-6890-3p         | 1  |
| <i>circSLAIN1</i> | miR-6890-5p         | 4  |
| <i>circSLAIN1</i> | miR-6892-3p         | 1  |

|                   |                           |    |
|-------------------|---------------------------|----|
| <i>circSLAIN1</i> | miR-6892-5p               | 2  |
| <i>circSLAIN1</i> | miR-6894-3p               | 8  |
| <i>circSLAIN1</i> | miR-7-5p                  | 6  |
| <i>circSLAIN1</i> | miR-708-3p                | 4  |
| <i>circSLAIN1</i> | miR-7109-3p               | 1  |
| <i>circSLAIN1</i> | miR-7111-3p               | 9  |
| <i>circSLAIN1</i> | miR-7152-5p               | 5  |
| <i>circSLAIN1</i> | miR-7155-5p               | 7  |
| <i>circSLAIN1</i> | miR-7156-3p               | 1  |
| <i>circSLAIN1</i> | miR-7158-3p               | 5  |
| <i>circSLAIN1</i> | miR-7159-3p               | 7  |
| <i>circSLAIN1</i> | miR-7159-5p               | 1  |
| <i>circSLAIN1</i> | miR-7160-5p               | 6  |
| <i>circSLAIN1</i> | miR-7162-3p               | 4  |
| <i>circSLAIN1</i> | miR-744-3p                | 5  |
| <i>circSLAIN1</i> | miR-758-3p                | 3  |
| <i>circSLAIN1</i> | miR-762/4492/4498/5001-5p | 2  |
| <i>circSLAIN1</i> | miR-7641                  | 5  |
| <i>circSLAIN1</i> | miR-766-3p                | 10 |
| <i>circSLAIN1</i> | miR-769-5p                | 1  |
| <i>circSLAIN1</i> | miR-7703                  | 4  |
| <i>circSLAIN1</i> | miR-7844-5p               | 3  |
| <i>circSLAIN1</i> | miR-7849-3p               | 1  |
| <i>circSLAIN1</i> | miR-7850-5p               | 5  |
| <i>circSLAIN1</i> | miR-7852-3p               | 4  |
| <i>circSLAIN1</i> | miR-7854-3p               | 7  |
| <i>circSLAIN1</i> | miR-7856-5p               | 1  |
| <i>circSLAIN1</i> | miR-8055                  | 3  |
| <i>circSLAIN1</i> | miR-8075                  | 2  |
| <i>circSLAIN1</i> | miR-8077                  | 6  |
| <i>circSLAIN1</i> | miR-8083                  | 2  |
| <i>circSLAIN1</i> | miR-8084                  | 6  |
| <i>circSLAIN1</i> | miR-8086                  | 2  |
| <i>circSLAIN1</i> | miR-8087                  | 1  |
| <i>circSLAIN1</i> | miR-8485                  | 11 |
| <i>circSLAIN1</i> | miR-873-3p                | 3  |
| <i>circSLAIN1</i> | miR-875-3p                | 1  |
| <i>circSLAIN1</i> | miR-876-3p                | 4  |

|                   |                              |   |
|-------------------|------------------------------|---|
| <i>circSLAIN1</i> | miR-876-5p                   | 1 |
| <i>circSLAIN1</i> | miR-887-3p                   | 1 |
| <i>circSLAIN1</i> | miR-888-5p                   | 5 |
| <i>circSLAIN1</i> | miR-891a-3p                  | 4 |
| <i>circSLAIN1</i> | miR-9-3p                     | 3 |
| <i>circSLAIN1</i> | miR-9-5p                     | 4 |
| <i>circSLAIN1</i> | miR-920/4300/5591-5p/6726-5p | 4 |
| <i>circSLAIN1</i> | miR-924                      | 2 |
| <i>circSLAIN1</i> | miR-93-3p                    | 3 |
| <i>circSLAIN1</i> | miR-934                      | 1 |
| <i>circSLAIN1</i> | miR-935                      | 4 |
| <i>circSLAIN1</i> | miR-936                      | 1 |
| <i>circSLAIN1</i> | miR-937-5p                   | 3 |
| <i>circSLAIN1</i> | miR-939-5p/1343-5p           | 4 |
| <i>circSLAIN1</i> | miR-940/6808-5p/6893-5p      | 1 |
| <i>circSLAIN1</i> | miR-942-5p                   | 5 |
| <i>circSLAIN1</i> | miR-943                      | 7 |
| <i>circSLAIN1</i> | miR-944                      | 3 |
| <i>circSLAIN1</i> | miR-9500                     | 3 |
| <i>circSLAIN1</i> | miR-1203                     | 2 |
| <i>circSLAIN1</i> | miR-1258                     | 3 |
| <i>circSLAIN1</i> | miR-1307-5p                  | 1 |
| <i>circSLAIN1</i> | miR-1323                     | 1 |
| <i>circSLAIN1</i> | miR-146-5p                   | 2 |
| <i>circSLAIN1</i> | miR-154-5p                   | 3 |
| <i>circSLAIN1</i> | miR-182-5p                   | 2 |
| <i>circSLAIN1</i> | miR-183-5p.1                 | 2 |
| <i>circSLAIN1</i> | miR-21-5p/590-5p             | 3 |
| <i>circSLAIN1</i> | miR-219-5p                   | 1 |
| <i>circSLAIN1</i> | miR-27b-5p                   | 3 |
| <i>circSLAIN1</i> | miR-3129-3p/5583-5p          | 2 |
| <i>circSLAIN1</i> | miR-3149                     | 1 |
| <i>circSLAIN1</i> | miR-3177-3p                  | 1 |
| <i>circSLAIN1</i> | miR-324-5p                   | 3 |
| <i>circSLAIN1</i> | miR-33a-3p                   | 2 |
| <i>circSLAIN1</i> | miR-3613-5p                  | 2 |
| <i>circSLAIN1</i> | miR-3664-5p                  | 1 |
| <i>circSLAIN1</i> | miR-3682-5p                  | 3 |

|                   |                                               |   |
|-------------------|-----------------------------------------------|---|
| <i>circSLAIN1</i> | miR-409-3p                                    | 2 |
| <i>circSLAIN1</i> | miR-4256                                      | 1 |
| <i>circSLAIN1</i> | miR-4267                                      | 1 |
| <i>circSLAIN1</i> | miR-433-5p                                    | 1 |
| <i>circSLAIN1</i> | miR-4445-5p                                   | 1 |
| <i>circSLAIN1</i> | miR-4453/4538                                 | 1 |
| <i>circSLAIN1</i> | miR-4497                                      | 3 |
| <i>circSLAIN1</i> | miR-4633-3p/6500-5p                           | 3 |
| <i>circSLAIN1</i> | miR-4635                                      | 1 |
| <i>circSLAIN1</i> | miR-4642                                      | 2 |
| <i>circSLAIN1</i> | miR-4699-3p                                   | 1 |
| <i>circSLAIN1</i> | miR-4714-5p                                   | 1 |
| <i>circSLAIN1</i> | miR-4777-3p                                   | 1 |
| <i>circSLAIN1</i> | miR-4781-3p                                   | 2 |
| <i>circSLAIN1</i> | miR-508-3p                                    | 1 |
| <i>circSLAIN1</i> | miR-5091                                      | 2 |
| <i>circSLAIN1</i> | miR-510-3p                                    | 1 |
| <i>circSLAIN1</i> | miR-513a-3p/513c-3p/3606-3p                   | 1 |
| <i>circSLAIN1</i> | miR-514a-5p                                   | 1 |
| <i>circSLAIN1</i> | miR-518-3p                                    | 1 |
| <i>circSLAIN1</i> | miR-518e-3p                                   | 1 |
| <i>circSLAIN1</i> | miR-5197-5p                                   | 2 |
| <i>circSLAIN1</i> | miR-548az-3p/548ar-3p/548a-3p/548e-3p/548f-3p | 1 |
| <i>circSLAIN1</i> | miR-5581-3p                                   | 1 |
| <i>circSLAIN1</i> | miR-5582-3p                                   | 1 |
| <i>circSLAIN1</i> | miR-5689                                      | 3 |
| <i>circSLAIN1</i> | miR-5739                                      | 2 |
| <i>circSLAIN1</i> | miR-589-5p                                    | 2 |
| <i>circSLAIN1</i> | miR-598-5p                                    | 1 |
| <i>circSLAIN1</i> | miR-630                                       | 1 |
| <i>circSLAIN1</i> | miR-664b-5p                                   | 3 |
| <i>circSLAIN1</i> | miR-6720-5p                                   | 1 |
| <i>circSLAIN1</i> | miR-6872-3p                                   | 1 |
| <i>circSLAIN1</i> | miR-7150                                      | 2 |
| <i>circSLAIN1</i> | miR-7973                                      | 1 |
| <i>circSLAIN1</i> | miR-8081                                      | 1 |
| <i>circSLAIN1</i> | miR-875-5p                                    | 1 |
| <i>circSLAIN1</i> | miR-890                                       | 2 |

|                   |                          |   |
|-------------------|--------------------------|---|
| <i>circSLAIN1</i> | miR-96-5p/1271-5p        | 2 |
| <i>circSLAIN1</i> | miR-208-3p               | 1 |
| <i>circSLAIN1</i> | miR-338-5p               | 1 |
| <i>circSLAIN1</i> | miR-483-3p.1             | 1 |
| <i>circSLAIN1</i> | miR-499a-5p              | 1 |
| <i>circSLAIN1</i> | miR-619-3p               | 1 |
| <i>circSLAIN1</i> | miR-631/3661             | 1 |
| <i>circSLAIN1</i> | miR-7851-3p              | 1 |
| <i>circSLAIN1</i> | miR-95-5p                | 1 |
| <i>circSLAIN2</i> | let-7-5p/98-5p           | 2 |
| <i>circSLAIN2</i> | let-7a-2-3p/let-7g-3p    | 1 |
| <i>circSLAIN2</i> | let-7c-3p                | 1 |
| <i>circSLAIN2</i> | miR-106b-3p              | 2 |
| <i>circSLAIN2</i> | miR-1183                 | 2 |
| <i>circSLAIN2</i> | miR-1185-5p              | 4 |
| <i>circSLAIN2</i> | miR-1199-5p/6751-3p      | 2 |
| <i>circSLAIN2</i> | miR-1200                 | 1 |
| <i>circSLAIN2</i> | miR-1203                 | 2 |
| <i>circSLAIN2</i> | miR-1224-5p              | 3 |
| <i>circSLAIN2</i> | miR-1225-5p              | 1 |
| <i>circSLAIN2</i> | miR-1229-5p              | 1 |
| <i>circSLAIN2</i> | miR-1231                 | 4 |
| <i>circSLAIN2</i> | miR-1233-5p/6778-5p      | 2 |
| <i>circSLAIN2</i> | miR-1238-3p              | 2 |
| <i>circSLAIN2</i> | miR-1238-5p/4758-5p      | 2 |
| <i>circSLAIN2</i> | miR-1247-5p              | 2 |
| <i>circSLAIN2</i> | miR-1250-3p              | 2 |
| <i>circSLAIN2</i> | miR-1256                 | 2 |
| <i>circSLAIN2</i> | miR-1257                 | 4 |
| <i>circSLAIN2</i> | miR-126-5p               | 2 |
| <i>circSLAIN2</i> | miR-1261                 | 1 |
| <i>circSLAIN2</i> | miR-1262/4701-3p/6736-5p | 2 |
| <i>circSLAIN2</i> | miR-1265                 | 2 |
| <i>circSLAIN2</i> | miR-1266-3p              | 1 |
| <i>circSLAIN2</i> | miR-1269                 | 3 |
| <i>circSLAIN2</i> | miR-127-5p               | 6 |
| <i>circSLAIN2</i> | miR-1270                 | 2 |
| <i>circSLAIN2</i> | miR-1272                 | 1 |



|                   |                     |   |
|-------------------|---------------------|---|
| <i>circSLAIN2</i> | miR-1273e           | 2 |
| <i>circSLAIN2</i> | miR-1273g-3p        | 2 |
| <i>circSLAIN2</i> | miR-1279            | 3 |
| <i>circSLAIN2</i> | miR-1282            | 2 |
| <i>circSLAIN2</i> | miR-1284            | 1 |
| <i>circSLAIN2</i> | miR-1286            | 2 |
| <i>circSLAIN2</i> | miR-1288-3p         | 6 |
| <i>circSLAIN2</i> | miR-1290            | 2 |
| <i>circSLAIN2</i> | miR-1295b-3p        | 2 |
| <i>circSLAIN2</i> | miR-1304-3p         | 1 |
| <i>circSLAIN2</i> | miR-1304-5p         | 4 |
| <i>circSLAIN2</i> | miR-1305            | 2 |
| <i>circSLAIN2</i> | miR-1322            | 1 |
| <i>circSLAIN2</i> | miR-1323            | 1 |
| <i>circSLAIN2</i> | miR-134-3p          | 4 |
| <i>circSLAIN2</i> | miR-134-5p          | 2 |
| <i>circSLAIN2</i> | miR-138-1-3p        | 2 |
| <i>circSLAIN2</i> | miR-139-3p          | 2 |
| <i>circSLAIN2</i> | miR-141-5p          | 2 |
| <i>circSLAIN2</i> | miR-145-3p          | 3 |
| <i>circSLAIN2</i> | miR-1468-5p         | 2 |
| <i>circSLAIN2</i> | miR-148a-5p         | 1 |
| <i>circSLAIN2</i> | miR-149-5p          | 1 |
| <i>circSLAIN2</i> | miR-153-3p          | 5 |
| <i>circSLAIN2</i> | miR-153-5p          | 3 |
| <i>circSLAIN2</i> | miR-1537-5p         | 4 |
| <i>circSLAIN2</i> | miR-154-3p/487-3p   | 2 |
| <i>circSLAIN2</i> | miR-1587/3620-5p    | 2 |
| <i>circSLAIN2</i> | miR-181-3p/4420     | 2 |
| <i>circSLAIN2</i> | miR-182-5p          | 2 |
| <i>circSLAIN2</i> | miR-183-3p          | 6 |
| <i>circSLAIN2</i> | miR-183-5p.2        | 2 |
| <i>circSLAIN2</i> | miR-185-3p          | 2 |
| <i>circSLAIN2</i> | miR-187-5p          | 2 |
| <i>circSLAIN2</i> | miR-1909-3p/6722-3p | 1 |
| <i>circSLAIN2</i> | miR-190a-3p         | 4 |
| <i>circSLAIN2</i> | miR-191-3p          | 2 |
| <i>circSLAIN2</i> | miR-193-3p          | 3 |

|                   |                                     |   |
|-------------------|-------------------------------------|---|
| <i>circSLAIN2</i> | miR-200c-5p/550a-3p                 | 1 |
| <i>circSLAIN2</i> | miR-2053                            | 1 |
| <i>circSLAIN2</i> | miR-208-5p                          | 2 |
| <i>circSLAIN2</i> | miR-20a-3p                          | 6 |
| <i>circSLAIN2</i> | miR-21-5p/590-5p                    | 1 |
| <i>circSLAIN2</i> | miR-2110                            | 2 |
| <i>circSLAIN2</i> | miR-2113                            | 2 |
| <i>circSLAIN2</i> | miR-214-3p/3619-5p                  | 1 |
| <i>circSLAIN2</i> | miR-216b-3p                         | 2 |
| <i>circSLAIN2</i> | miR-217                             | 1 |
| <i>circSLAIN2</i> | miR-219a-1-3p                       | 2 |
| <i>circSLAIN2</i> | miR-219a-2-3p                       | 6 |
| <i>circSLAIN2</i> | miR-219b-3p                         | 6 |
| <i>circSLAIN2</i> | miR-223-5p                          | 2 |
| <i>circSLAIN2</i> | miR-25-3p/32-5p/92-3p/363-3p/367-3p | 2 |
| <i>circSLAIN2</i> | miR-26-3p                           | 2 |
| <i>circSLAIN2</i> | miR-26-5p                           | 4 |
| <i>circSLAIN2</i> | miR-2682-3p/6781-3p                 | 2 |
| <i>circSLAIN2</i> | miR-27b-5p                          | 2 |
| <i>circSLAIN2</i> | miR-297                             | 2 |
| <i>circSLAIN2</i> | miR-302c-5p                         | 3 |
| <i>circSLAIN2</i> | miR-302f                            | 4 |
| <i>circSLAIN2</i> | miR-3064-5p                         | 2 |
| <i>circSLAIN2</i> | miR-3074-5p                         | 3 |
| <i>circSLAIN2</i> | miR-3115                            | 2 |
| <i>circSLAIN2</i> | miR-3117-5p                         | 2 |
| <i>circSLAIN2</i> | miR-3120-3p                         | 1 |
| <i>circSLAIN2</i> | miR-3120-5p                         | 2 |
| <i>circSLAIN2</i> | miR-3125/3916/6859-5p               | 1 |
| <i>circSLAIN2</i> | miR-3128                            | 2 |
| <i>circSLAIN2</i> | miR-3129-3p/5583-5p                 | 1 |
| <i>circSLAIN2</i> | miR-3130-3p                         | 1 |
| <i>circSLAIN2</i> | miR-3134                            | 2 |
| <i>circSLAIN2</i> | miR-3136-5p/4439                    | 2 |
| <i>circSLAIN2</i> | miR-3140-3p                         | 4 |
| <i>circSLAIN2</i> | miR-3140-5p                         | 1 |
| <i>circSLAIN2</i> | miR-3143                            | 2 |
| <i>circSLAIN2</i> | miR-3144-5p                         | 2 |

|                   |                    |   |
|-------------------|--------------------|---|
| <i>circSLAIN2</i> | miR-3150a-3p       | 2 |
| <i>circSLAIN2</i> | miR-3151-3p        | 1 |
| <i>circSLAIN2</i> | miR-3151-5p        | 2 |
| <i>circSLAIN2</i> | miR-3152-5p        | 1 |
| <i>circSLAIN2</i> | miR-3159           | 4 |
| <i>circSLAIN2</i> | miR-3160-3p        | 1 |
| <i>circSLAIN2</i> | miR-3164           | 2 |
| <i>circSLAIN2</i> | miR-3169           | 5 |
| <i>circSLAIN2</i> | miR-3170/6855-5p   | 2 |
| <i>circSLAIN2</i> | miR-3180-5p        | 2 |
| <i>circSLAIN2</i> | miR-3182           | 3 |
| <i>circSLAIN2</i> | miR-3191-3p        | 2 |
| <i>circSLAIN2</i> | miR-3193           | 2 |
| <i>circSLAIN2</i> | miR-3195           | 2 |
| <i>circSLAIN2</i> | miR-320e           | 3 |
| <i>circSLAIN2</i> | miR-324-5p         | 2 |
| <i>circSLAIN2</i> | miR-329-5p         | 4 |
| <i>circSLAIN2</i> | miR-33-5p          | 1 |
| <i>circSLAIN2</i> | miR-335-3p         | 6 |
| <i>circSLAIN2</i> | miR-340-3p/6827-3p | 2 |
| <i>circSLAIN2</i> | miR-340-5p         | 2 |
| <i>circSLAIN2</i> | miR-345-3p         | 1 |
| <i>circSLAIN2</i> | miR-345-5p         | 1 |
| <i>circSLAIN2</i> | miR-34b-3p         | 1 |
| <i>circSLAIN2</i> | miR-34c-3p         | 1 |
| <i>circSLAIN2</i> | miR-3605-3p        | 2 |
| <i>circSLAIN2</i> | miR-3605-5p        | 4 |
| <i>circSLAIN2</i> | miR-3607-3p        | 2 |
| <i>circSLAIN2</i> | miR-3614-5p        | 2 |
| <i>circSLAIN2</i> | miR-3655           | 2 |
| <i>circSLAIN2</i> | miR-3660/4526      | 1 |
| <i>circSLAIN2</i> | miR-3674           | 3 |
| <i>circSLAIN2</i> | miR-3679-3p        | 2 |
| <i>circSLAIN2</i> | miR-3680-5p        | 1 |
| <i>circSLAIN2</i> | miR-3681-5p        | 2 |
| <i>circSLAIN2</i> | miR-3686           | 3 |
| <i>circSLAIN2</i> | miR-3689d/6851-5p  | 2 |
| <i>circSLAIN2</i> | miR-3691-5p        | 1 |

|                   |                     |   |
|-------------------|---------------------|---|
| <i>circSLAIN2</i> | miR-3692-5p         | 4 |
| <i>circSLAIN2</i> | miR-374-5p          | 1 |
| <i>circSLAIN2</i> | miR-374b-3p         | 1 |
| <i>circSLAIN2</i> | miR-376-3p          | 4 |
| <i>circSLAIN2</i> | miR-376b-5p/376c-5p | 1 |
| <i>circSLAIN2</i> | miR-376c-3p         | 1 |
| <i>circSLAIN2</i> | miR-377-5p/6086     | 4 |
| <i>circSLAIN2</i> | miR-378a-5p         | 1 |
| <i>circSLAIN2</i> | miR-380-5p/563      | 2 |
| <i>circSLAIN2</i> | miR-381-5p          | 4 |
| <i>circSLAIN2</i> | miR-382-3p          | 1 |
| <i>circSLAIN2</i> | miR-3915            | 3 |
| <i>circSLAIN2</i> | miR-3929/4419b/4478 | 2 |
| <i>circSLAIN2</i> | miR-3938            | 2 |
| <i>circSLAIN2</i> | miR-3976            | 3 |
| <i>circSLAIN2</i> | miR-410-3p          | 2 |
| <i>circSLAIN2</i> | miR-412-5p          | 2 |
| <i>circSLAIN2</i> | miR-421             | 1 |
| <i>circSLAIN2</i> | miR-425-3p          | 1 |
| <i>circSLAIN2</i> | miR-4252            | 2 |
| <i>circSLAIN2</i> | miR-4265/4296/4322  | 4 |
| <i>circSLAIN2</i> | miR-4266            | 2 |
| <i>circSLAIN2</i> | miR-4282            | 2 |
| <i>circSLAIN2</i> | miR-4293            | 2 |
| <i>circSLAIN2</i> | miR-4299            | 2 |
| <i>circSLAIN2</i> | miR-4303            | 2 |
| <i>circSLAIN2</i> | miR-431-3p          | 2 |
| <i>circSLAIN2</i> | miR-431-5p          | 2 |
| <i>circSLAIN2</i> | miR-4312            | 2 |
| <i>circSLAIN2</i> | miR-4314            | 3 |
| <i>circSLAIN2</i> | miR-4317            | 2 |
| <i>circSLAIN2</i> | miR-4324            | 2 |
| <i>circSLAIN2</i> | miR-4326            | 1 |
| <i>circSLAIN2</i> | miR-4426/4647/4662b | 2 |
| <i>circSLAIN2</i> | miR-4427            | 2 |
| <i>circSLAIN2</i> | miR-4432            | 1 |
| <i>circSLAIN2</i> | miR-4433a-3p        | 2 |
| <i>circSLAIN2</i> | miR-4434/4516/5703  | 2 |

|                   |                          |   |
|-------------------|--------------------------|---|
| <i>circSLAIN2</i> | miR-4443                 | 2 |
| <i>circSLAIN2</i> | miR-4447/4472            | 2 |
| <i>circSLAIN2</i> | miR-4452                 | 6 |
| <i>circSLAIN2</i> | miR-4456                 | 2 |
| <i>circSLAIN2</i> | miR-4459                 | 2 |
| <i>circSLAIN2</i> | miR-4463                 | 1 |
| <i>circSLAIN2</i> | miR-4464/4748            | 1 |
| <i>circSLAIN2</i> | miR-4468                 | 2 |
| <i>circSLAIN2</i> | miR-4476/6876-5p         | 2 |
| <i>circSLAIN2</i> | miR-448                  | 5 |
| <i>circSLAIN2</i> | miR-4481/4745-5p         | 2 |
| <i>circSLAIN2</i> | miR-4482-3p              | 2 |
| <i>circSLAIN2</i> | miR-4484                 | 2 |
| <i>circSLAIN2</i> | miR-4487                 | 1 |
| <i>circSLAIN2</i> | miR-4497                 | 2 |
| <i>circSLAIN2</i> | miR-4499                 | 1 |
| <i>circSLAIN2</i> | miR-450b-3p/769-3p       | 2 |
| <i>circSLAIN2</i> | miR-4513/6855-3p         | 2 |
| <i>circSLAIN2</i> | miR-4515                 | 6 |
| <i>circSLAIN2</i> | miR-452-3p               | 3 |
| <i>circSLAIN2</i> | miR-4520-2-3p            | 2 |
| <i>circSLAIN2</i> | miR-4520-5p              | 1 |
| <i>circSLAIN2</i> | miR-4529-3p              | 2 |
| <i>circSLAIN2</i> | miR-4531                 | 2 |
| <i>circSLAIN2</i> | miR-4534/8082            | 2 |
| <i>circSLAIN2</i> | miR-4635                 | 4 |
| <i>circSLAIN2</i> | miR-4637                 | 1 |
| <i>circSLAIN2</i> | miR-4639-3p              | 2 |
| <i>circSLAIN2</i> | miR-4642                 | 2 |
| <i>circSLAIN2</i> | miR-4648                 | 2 |
| <i>circSLAIN2</i> | miR-4649-3p              | 3 |
| <i>circSLAIN2</i> | miR-4652-3p              | 2 |
| <i>circSLAIN2</i> | miR-4652-5p              | 2 |
| <i>circSLAIN2</i> | miR-4654/4769-5p         | 2 |
| <i>circSLAIN2</i> | miR-4658/6790-5p         | 2 |
| <i>circSLAIN2</i> | miR-4659a-3p/4659b-3p    | 3 |
| <i>circSLAIN2</i> | miR-4666b                | 1 |
| <i>circSLAIN2</i> | miR-4667-5p/4700-5p/8089 | 2 |

|                   |                             |   |
|-------------------|-----------------------------|---|
| <i>circSLAIN2</i> | miR-4674                    | 2 |
| <i>circSLAIN2</i> | miR-4678                    | 2 |
| <i>circSLAIN2</i> | miR-4680-3p                 | 2 |
| <i>circSLAIN2</i> | miR-4682                    | 3 |
| <i>circSLAIN2</i> | miR-4683                    | 2 |
| <i>circSLAIN2</i> | miR-4684-3p                 | 2 |
| <i>circSLAIN2</i> | miR-4687-3p                 | 2 |
| <i>circSLAIN2</i> | miR-4689/6858-5p            | 3 |
| <i>circSLAIN2</i> | miR-4690-5p                 | 3 |
| <i>circSLAIN2</i> | miR-4691-5p/6792-3p         | 2 |
| <i>circSLAIN2</i> | miR-4695-5p                 | 2 |
| <i>circSLAIN2</i> | miR-4696                    | 2 |
| <i>circSLAIN2</i> | miR-4711-5p                 | 1 |
| <i>circSLAIN2</i> | miR-4718                    | 4 |
| <i>circSLAIN2</i> | miR-4720-5p/4799-3p/5588-5p | 2 |
| <i>circSLAIN2</i> | miR-4722-5p                 | 2 |
| <i>circSLAIN2</i> | miR-4727-5p                 | 2 |
| <i>circSLAIN2</i> | miR-4729                    | 1 |
| <i>circSLAIN2</i> | miR-4735-5p                 | 1 |
| <i>circSLAIN2</i> | miR-4740-3p                 | 2 |
| <i>circSLAIN2</i> | miR-4740-5p                 | 6 |
| <i>circSLAIN2</i> | miR-4742-3p                 | 2 |
| <i>circSLAIN2</i> | miR-4743-3p                 | 2 |
| <i>circSLAIN2</i> | miR-4751                    | 2 |
| <i>circSLAIN2</i> | miR-4752                    | 1 |
| <i>circSLAIN2</i> | miR-4759                    | 5 |
| <i>circSLAIN2</i> | miR-4760-5p/8061            | 2 |
| <i>circSLAIN2</i> | miR-4762-3p                 | 1 |
| <i>circSLAIN2</i> | miR-4763-5p                 | 1 |
| <i>circSLAIN2</i> | miR-4764-3p                 | 3 |
| <i>circSLAIN2</i> | miR-4768-3p                 | 2 |
| <i>circSLAIN2</i> | miR-4774-3p                 | 1 |
| <i>circSLAIN2</i> | miR-4778-5p                 | 3 |
| <i>circSLAIN2</i> | miR-4779                    | 2 |
| <i>circSLAIN2</i> | miR-4786-3p                 | 4 |
| <i>circSLAIN2</i> | miR-4793-3p                 | 1 |
| <i>circSLAIN2</i> | miR-4795-3p                 | 2 |
| <i>circSLAIN2</i> | miR-4795-5p                 | 4 |

|                   |                             |   |
|-------------------|-----------------------------|---|
| <i>circSLAIN2</i> | miR-4798-3p                 | 1 |
| <i>circSLAIN2</i> | miR-4799-5p                 | 1 |
| <i>circSLAIN2</i> | miR-4802-5p                 | 2 |
| <i>circSLAIN2</i> | miR-488-3p                  | 4 |
| <i>circSLAIN2</i> | miR-489-3p                  | 1 |
| <i>circSLAIN2</i> | miR-490-3p                  | 1 |
| <i>circSLAIN2</i> | miR-491-5p                  | 2 |
| <i>circSLAIN2</i> | miR-493-5p                  | 1 |
| <i>circSLAIN2</i> | miR-496.2                   | 2 |
| <i>circSLAIN2</i> | miR-498                     | 2 |
| <i>circSLAIN2</i> | miR-4999-5p                 | 4 |
| <i>circSLAIN2</i> | miR-499a-3p/499b-3p         | 3 |
| <i>circSLAIN2</i> | miR-5000-3p                 | 1 |
| <i>circSLAIN2</i> | miR-5001-3p                 | 2 |
| <i>circSLAIN2</i> | miR-5002-3p                 | 3 |
| <i>circSLAIN2</i> | miR-5002-5p                 | 2 |
| <i>circSLAIN2</i> | miR-5004-3p                 | 1 |
| <i>circSLAIN2</i> | miR-5004-5p                 | 2 |
| <i>circSLAIN2</i> | miR-5009-5p/8058            | 3 |
| <i>circSLAIN2</i> | miR-500a-3p                 | 1 |
| <i>circSLAIN2</i> | miR-5010-3p                 | 2 |
| <i>circSLAIN2</i> | miR-5011-3p                 | 1 |
| <i>circSLAIN2</i> | miR-503-3p                  | 1 |
| <i>circSLAIN2</i> | miR-505-3p.1                | 2 |
| <i>circSLAIN2</i> | miR-505-3p.2                | 1 |
| <i>circSLAIN2</i> | miR-5087                    | 1 |
| <i>circSLAIN2</i> | miR-5089-5p                 | 2 |
| <i>circSLAIN2</i> | miR-509-3-5p/509-5p/4418    | 1 |
| <i>circSLAIN2</i> | miR-5091                    | 2 |
| <i>circSLAIN2</i> | miR-5094                    | 1 |
| <i>circSLAIN2</i> | miR-5096                    | 2 |
| <i>circSLAIN2</i> | miR-510-3p                  | 4 |
| <i>circSLAIN2</i> | miR-513a-3p/513c-3p/3606-3p | 4 |
| <i>circSLAIN2</i> | miR-5186                    | 1 |
| <i>circSLAIN2</i> | miR-5187-3p                 | 2 |
| <i>circSLAIN2</i> | miR-5187-5p                 | 2 |
| <i>circSLAIN2</i> | miR-524-3p/525-3p           | 2 |
| <i>circSLAIN2</i> | miR-526b-5p                 | 2 |

|                   |                                                                  |   |
|-------------------|------------------------------------------------------------------|---|
| <i>circSLAIN2</i> | miR-543                                                          | 2 |
| <i>circSLAIN2</i> | miR-544a                                                         | 5 |
| <i>circSLAIN2</i> | miR-544b                                                         | 2 |
| <i>circSLAIN2</i> | miR-545-3p                                                       | 1 |
| <i>circSLAIN2</i> | miR-548an                                                        | 2 |
| <i>circSLAIN2</i> | miR-548ao-5p/548ax                                               | 2 |
| <i>circSLAIN2</i> | miR-548ap-3p/548aa/548t-3p                                       | 2 |
| <i>circSLAIN2</i> | miR-548as-3p                                                     | 2 |
| <i>circSLAIN2</i> | miR-548av-5p/548k/8054                                           | 3 |
| <i>circSLAIN2</i> | miR-548ay-3p/548at-3p                                            | 2 |
| <i>circSLAIN2</i> | miR-548ay-5p/548au-5p/548as-5p/548ar-3p/548aq-5p/548ap-5p/548am- | 3 |
| <i>circSLAIN2</i> | miR-548az-3p/548ar-3p/548a-3p/548e-3p/548f-3p                    | 3 |
| <i>circSLAIN2</i> | miR-548az-5p/548t-5p                                             | 3 |
| <i>circSLAIN2</i> | miR-548l                                                         | 3 |
| <i>circSLAIN2</i> | miR-548n                                                         | 3 |
| <i>circSLAIN2</i> | miR-548q                                                         | 2 |
| <i>circSLAIN2</i> | miR-552-3p                                                       | 1 |
| <i>circSLAIN2</i> | miR-552-5p                                                       | 2 |
| <i>circSLAIN2</i> | miR-555                                                          | 1 |
| <i>circSLAIN2</i> | miR-5571-5p                                                      | 3 |
| <i>circSLAIN2</i> | miR-5579-3p                                                      | 1 |
| <i>circSLAIN2</i> | miR-558                                                          | 1 |
| <i>circSLAIN2</i> | miR-5582-3p                                                      | 1 |
| <i>circSLAIN2</i> | miR-5585-5p                                                      | 2 |
| <i>circSLAIN2</i> | miR-5681a                                                        | 4 |
| <i>circSLAIN2</i> | miR-5681b                                                        | 2 |
| <i>circSLAIN2</i> | miR-5682                                                         | 1 |
| <i>circSLAIN2</i> | miR-5684                                                         | 2 |
| <i>circSLAIN2</i> | miR-5689                                                         | 2 |
| <i>circSLAIN2</i> | miR-5696                                                         | 3 |
| <i>circSLAIN2</i> | miR-570-3p                                                       | 2 |
| <i>circSLAIN2</i> | miR-5701                                                         | 1 |
| <i>circSLAIN2</i> | miR-5702                                                         | 4 |
| <i>circSLAIN2</i> | miR-5707                                                         | 2 |
| <i>circSLAIN2</i> | miR-571                                                          | 2 |
| <i>circSLAIN2</i> | miR-573/3616-5p                                                  | 3 |
| <i>circSLAIN2</i> | miR-5739                                                         | 2 |
| <i>circSLAIN2</i> | miR-576-3p                                                       | 2 |



|                   |                  |   |
|-------------------|------------------|---|
| <i>circSLAIN2</i> | miR-578          | 2 |
| <i>circSLAIN2</i> | miR-579-3p       | 3 |
| <i>circSLAIN2</i> | miR-581          | 2 |
| <i>circSLAIN2</i> | miR-582-3p       | 1 |
| <i>circSLAIN2</i> | miR-585-5p       | 1 |
| <i>circSLAIN2</i> | miR-586          | 1 |
| <i>circSLAIN2</i> | miR-589-3p       | 2 |
| <i>circSLAIN2</i> | miR-592          | 3 |
| <i>circSLAIN2</i> | miR-596          | 2 |
| <i>circSLAIN2</i> | miR-599          | 3 |
| <i>circSLAIN2</i> | miR-600          | 1 |
| <i>circSLAIN2</i> | miR-604          | 2 |
| <i>circSLAIN2</i> | miR-6069         | 2 |
| <i>circSLAIN2</i> | miR-6071         | 2 |
| <i>circSLAIN2</i> | miR-6074         | 5 |
| <i>circSLAIN2</i> | miR-6076/6797-3p | 1 |
| <i>circSLAIN2</i> | miR-6077         | 1 |
| <i>circSLAIN2</i> | miR-6079         | 1 |
| <i>circSLAIN2</i> | miR-6083         | 2 |
| <i>circSLAIN2</i> | miR-6132/6836-5p | 1 |
| <i>circSLAIN2</i> | miR-6134         | 4 |
| <i>circSLAIN2</i> | miR-615-3p       | 2 |
| <i>circSLAIN2</i> | miR-6165         | 3 |
| <i>circSLAIN2</i> | miR-621          | 1 |
| <i>circSLAIN2</i> | miR-624-5p       | 1 |
| <i>circSLAIN2</i> | miR-625-3p       | 4 |
| <i>circSLAIN2</i> | miR-627-3p       | 4 |
| <i>circSLAIN2</i> | miR-627-5p       | 4 |
| <i>circSLAIN2</i> | miR-630          | 2 |
| <i>circSLAIN2</i> | miR-632/4288     | 4 |
| <i>circSLAIN2</i> | miR-635/6774-5p  | 1 |
| <i>circSLAIN2</i> | miR-637          | 2 |
| <i>circSLAIN2</i> | miR-643          | 2 |
| <i>circSLAIN2</i> | miR-647          | 4 |
| <i>circSLAIN2</i> | miR-649          | 1 |
| <i>circSLAIN2</i> | miR-6500-3p      | 2 |
| <i>circSLAIN2</i> | miR-6503-3p      | 1 |
| <i>circSLAIN2</i> | miR-6508-5p/8067 | 1 |

|                   |                             |   |
|-------------------|-----------------------------|---|
| <i>circSLAIN2</i> | miR-6509-5p                 | 2 |
| <i>circSLAIN2</i> | miR-6510-5p                 | 3 |
| <i>circSLAIN2</i> | miR-6514-3p                 | 1 |
| <i>circSLAIN2</i> | miR-6514-5p                 | 2 |
| <i>circSLAIN2</i> | miR-6515-5p                 | 2 |
| <i>circSLAIN2</i> | miR-653-3p                  | 2 |
| <i>circSLAIN2</i> | miR-655-5p                  | 4 |
| <i>circSLAIN2</i> | miR-656-5p                  | 4 |
| <i>circSLAIN2</i> | miR-664a-5p/4794            | 1 |
| <i>circSLAIN2</i> | miR-664b-5p                 | 4 |
| <i>circSLAIN2</i> | miR-668-3p                  | 2 |
| <i>circSLAIN2</i> | miR-670-3p                  | 2 |
| <i>circSLAIN2</i> | miR-6719-3p                 | 1 |
| <i>circSLAIN2</i> | miR-6728-5p                 | 2 |
| <i>circSLAIN2</i> | miR-6730-3p                 | 1 |
| <i>circSLAIN2</i> | miR-6730-5p                 | 4 |
| <i>circSLAIN2</i> | miR-6731-3p                 | 2 |
| <i>circSLAIN2</i> | miR-6737-5p/6812-5p/6819-5p | 2 |
| <i>circSLAIN2</i> | miR-6738-3p                 | 5 |
| <i>circSLAIN2</i> | miR-6740-5p                 | 5 |
| <i>circSLAIN2</i> | miR-6741-5p                 | 2 |
| <i>circSLAIN2</i> | miR-6742-5p                 | 2 |
| <i>circSLAIN2</i> | miR-6749-3p                 | 2 |
| <i>circSLAIN2</i> | miR-675-3p                  | 2 |
| <i>circSLAIN2</i> | miR-6750-3p                 | 3 |
| <i>circSLAIN2</i> | miR-6755-5p                 | 1 |
| <i>circSLAIN2</i> | miR-6759-5p                 | 4 |
| <i>circSLAIN2</i> | miR-676-5p                  | 3 |
| <i>circSLAIN2</i> | miR-6762-3p                 | 2 |
| <i>circSLAIN2</i> | miR-6763-3p                 | 2 |
| <i>circSLAIN2</i> | miR-6768-3p                 | 2 |
| <i>circSLAIN2</i> | miR-6771-3p                 | 1 |
| <i>circSLAIN2</i> | miR-6771-5p                 | 1 |
| <i>circSLAIN2</i> | miR-6776-5p                 | 2 |
| <i>circSLAIN2</i> | miR-6796-5p                 | 4 |
| <i>circSLAIN2</i> | miR-6798-3p                 | 1 |
| <i>circSLAIN2</i> | miR-6800-5p                 | 2 |
| <i>circSLAIN2</i> | miR-6802-5p                 | 2 |

|                   |             |   |
|-------------------|-------------|---|
| <i>circSLAIN2</i> | miR-6810-5p | 2 |
| <i>circSLAIN2</i> | miR-6815-3p | 1 |
| <i>circSLAIN2</i> | miR-6816-3p | 2 |
| <i>circSLAIN2</i> | miR-6821-5p | 2 |
| <i>circSLAIN2</i> | miR-6823-5p | 1 |
| <i>circSLAIN2</i> | miR-6828-3p | 2 |
| <i>circSLAIN2</i> | miR-6831-3p | 1 |
| <i>circSLAIN2</i> | miR-6833-5p | 1 |
| <i>circSLAIN2</i> | miR-6836-3p | 2 |
| <i>circSLAIN2</i> | miR-6841-5p | 1 |
| <i>circSLAIN2</i> | miR-6842-3p | 4 |
| <i>circSLAIN2</i> | miR-6853-5p | 2 |
| <i>circSLAIN2</i> | miR-6857-3p | 2 |
| <i>circSLAIN2</i> | miR-6857-5p | 2 |
| <i>circSLAIN2</i> | miR-6861-5p | 2 |
| <i>circSLAIN2</i> | miR-6863    | 2 |
| <i>circSLAIN2</i> | miR-6866-5p | 1 |
| <i>circSLAIN2</i> | miR-6868-5p | 2 |
| <i>circSLAIN2</i> | miR-6875-3p | 3 |
| <i>circSLAIN2</i> | miR-6878-3p | 2 |
| <i>circSLAIN2</i> | miR-6888-3p | 2 |
| <i>circSLAIN2</i> | miR-6888-5p | 2 |
| <i>circSLAIN2</i> | miR-6890-3p | 2 |
| <i>circSLAIN2</i> | miR-6894-3p | 1 |
| <i>circSLAIN2</i> | miR-6894-5p | 2 |
| <i>circSLAIN2</i> | miR-7-5p    | 1 |
| <i>circSLAIN2</i> | miR-7109-3p | 2 |
| <i>circSLAIN2</i> | miR-7112-3p | 1 |
| <i>circSLAIN2</i> | miR-7114-5p | 4 |
| <i>circSLAIN2</i> | miR-7152-5p | 3 |
| <i>circSLAIN2</i> | miR-7154-3p | 2 |
| <i>circSLAIN2</i> | miR-7155-5p | 2 |
| <i>circSLAIN2</i> | miR-7159-3p | 2 |
| <i>circSLAIN2</i> | miR-7159-5p | 1 |
| <i>circSLAIN2</i> | miR-7162-3p | 3 |
| <i>circSLAIN2</i> | miR-758-5p  | 2 |
| <i>circSLAIN2</i> | miR-765     | 2 |
| <i>circSLAIN2</i> | miR-766-5p  | 2 |

|                   |                   |   |
|-------------------|-------------------|---|
| <i>circSLAIN2</i> | miR-767-5p        | 1 |
| <i>circSLAIN2</i> | miR-770-5p        | 1 |
| <i>circSLAIN2</i> | miR-7843-3p       | 6 |
| <i>circSLAIN2</i> | miR-7844-5p       | 1 |
| <i>circSLAIN2</i> | miR-7847-3p       | 2 |
| <i>circSLAIN2</i> | miR-7850-5p       | 3 |
| <i>circSLAIN2</i> | miR-7854-3p       | 4 |
| <i>circSLAIN2</i> | miR-7855-5p       | 4 |
| <i>circSLAIN2</i> | miR-7974          | 2 |
| <i>circSLAIN2</i> | miR-7978          | 2 |
| <i>circSLAIN2</i> | miR-8055          | 4 |
| <i>circSLAIN2</i> | miR-8056          | 1 |
| <i>circSLAIN2</i> | miR-8064          | 1 |
| <i>circSLAIN2</i> | miR-8068          | 1 |
| <i>circSLAIN2</i> | miR-8069          | 2 |
| <i>circSLAIN2</i> | miR-8080          | 2 |
| <i>circSLAIN2</i> | miR-8081          | 3 |
| <i>circSLAIN2</i> | miR-8083          | 5 |
| <i>circSLAIN2</i> | miR-8087          | 1 |
| <i>circSLAIN2</i> | miR-873-3p        | 2 |
| <i>circSLAIN2</i> | miR-873-5p.1      | 2 |
| <i>circSLAIN2</i> | miR-873-5p.2      | 2 |
| <i>circSLAIN2</i> | miR-876-5p        | 2 |
| <i>circSLAIN2</i> | miR-877-5p        | 1 |
| <i>circSLAIN2</i> | miR-887-3p        | 2 |
| <i>circSLAIN2</i> | miR-888-5p        | 1 |
| <i>circSLAIN2</i> | miR-890           | 1 |
| <i>circSLAIN2</i> | miR-922           | 1 |
| <i>circSLAIN2</i> | miR-93-3p         | 4 |
| <i>circSLAIN2</i> | miR-937-5p        | 4 |
| <i>circSLAIN2</i> | miR-942-3p        | 2 |
| <i>circSLAIN2</i> | miR-943           | 2 |
| <i>circSLAIN2</i> | miR-96-5p/1271-5p | 2 |
| <i>circSLAIN2</i> | miR-1226-5p       | 2 |
| <i>circSLAIN2</i> | miR-1251-3p       | 2 |
| <i>circSLAIN2</i> | miR-129-5p        | 1 |
| <i>circSLAIN2</i> | miR-130b-5p       | 1 |
| <i>circSLAIN2</i> | miR-1827          | 2 |

|                   |                                    |   |
|-------------------|------------------------------------|---|
| <i>circSLAIN2</i> | miR-204-3p/4646-5p                 | 1 |
| <i>circSLAIN2</i> | miR-205-5p                         | 1 |
| <i>circSLAIN2</i> | miR-30-3p                          | 2 |
| <i>circSLAIN2</i> | miR-302-3p/372-3p/373-3p/520-3p    | 2 |
| <i>circSLAIN2</i> | miR-302a-5p                        | 1 |
| <i>circSLAIN2</i> | miR-3119                           | 2 |
| <i>circSLAIN2</i> | miR-3121-5p                        | 2 |
| <i>circSLAIN2</i> | miR-3126-5p                        | 2 |
| <i>circSLAIN2</i> | miR-3148                           | 2 |
| <i>circSLAIN2</i> | miR-3153/6733-5p/6739-5p           | 1 |
| <i>circSLAIN2</i> | miR-3157-5p                        | 2 |
| <i>circSLAIN2</i> | miR-3192-5p                        | 1 |
| <i>circSLAIN2</i> | miR-3614-3p                        | 2 |
| <i>circSLAIN2</i> | miR-3692-3p                        | 1 |
| <i>circSLAIN2</i> | miR-374a-3p                        | 1 |
| <i>circSLAIN2</i> | miR-3928-5p/6806-3p                | 1 |
| <i>circSLAIN2</i> | miR-3935                           | 1 |
| <i>circSLAIN2</i> | miR-4289                           | 1 |
| <i>circSLAIN2</i> | miR-4419a/4510/6127/6129/6130/6133 | 2 |
| <i>circSLAIN2</i> | miR-4436b-5p                       | 1 |
| <i>circSLAIN2</i> | miR-4446-5p                        | 1 |
| <i>circSLAIN2</i> | miR-4470                           | 2 |
| <i>circSLAIN2</i> | miR-4496                           | 1 |
| <i>circSLAIN2</i> | miR-450-5p                         | 2 |
| <i>circSLAIN2</i> | miR-452-5p/892-3p                  | 2 |
| <i>circSLAIN2</i> | miR-4668-5p                        | 1 |
| <i>circSLAIN2</i> | miR-4670-3p                        | 2 |
| <i>circSLAIN2</i> | miR-4733-5p                        | 1 |
| <i>circSLAIN2</i> | miR-4737                           | 2 |
| <i>circSLAIN2</i> | miR-4747-5p/5196-5p                | 2 |
| <i>circSLAIN2</i> | miR-4755-5p/5006-3p                | 1 |
| <i>circSLAIN2</i> | miR-4760-3p                        | 1 |
| <i>circSLAIN2</i> | miR-5011-5p                        | 2 |
| <i>circSLAIN2</i> | miR-509-3p                         | 1 |
| <i>circSLAIN2</i> | miR-519-3p                         | 2 |
| <i>circSLAIN2</i> | miR-551b-5p                        | 1 |
| <i>circSLAIN2</i> | miR-5584-5p                        | 2 |
| <i>circSLAIN2</i> | miR-580-5p                         | 1 |

|                     |                       |    |
|---------------------|-----------------------|----|
| <i>circSLAIN2</i>   | miR-590-3p            | 2  |
| <i>circSLAIN2</i>   | miR-6081              | 1  |
| <i>circSLAIN2</i>   | miR-6124              | 2  |
| <i>circSLAIN2</i>   | miR-619-5p/6506-5p    | 1  |
| <i>circSLAIN2</i>   | miR-6505-5p           | 1  |
| <i>circSLAIN2</i>   | miR-6509-3p           | 1  |
| <i>circSLAIN2</i>   | miR-651-3p            | 1  |
| <i>circSLAIN2</i>   | miR-6734-5p           | 2  |
| <i>circSLAIN2</i>   | miR-6750-5p/6822-5p   | 2  |
| <i>circSLAIN2</i>   | miR-6827-5p           | 1  |
| <i>circSLAIN2</i>   | miR-6834-5p           | 2  |
| <i>circSLAIN2</i>   | miR-6883-3p           | 1  |
| <i>circSLAIN2</i>   | miR-891b              | 2  |
| <i>circSLAIN2</i>   | miR-944               | 1  |
| <i>circSLAIN2</i>   | miR-9500              | 2  |
| <i>circSLC39A10</i> | let-7a-2-3p/let-7g-3p | 4  |
| <i>circSLC39A10</i> | let-7c-3p             | 4  |
| <i>circSLC39A10</i> | miR-1-3p/206          | 4  |
| <i>circSLC39A10</i> | miR-1-5p              | 3  |
| <i>circSLC39A10</i> | miR-10-5p             | 3  |
| <i>circSLC39A10</i> | miR-103a-2-5p         | 3  |
| <i>circSLC39A10</i> | miR-105-5p            | 5  |
| <i>circSLC39A10</i> | miR-106a-3p           | 4  |
| <i>circSLC39A10</i> | miR-1178-3p           | 5  |
| <i>circSLC39A10</i> | miR-1204              | 3  |
| <i>circSLC39A10</i> | miR-1206              | 4  |
| <i>circSLC39A10</i> | miR-1231              | 4  |
| <i>circSLC39A10</i> | miR-1236-5p           | 5  |
| <i>circSLC39A10</i> | miR-1238-3p           | 8  |
| <i>circSLC39A10</i> | miR-1238-5p/4758-5p   | 6  |
| <i>circSLC39A10</i> | miR-125-5p            | 3  |
| <i>circSLC39A10</i> | miR-1250-3p           | 6  |
| <i>circSLC39A10</i> | miR-1251-3p           | 3  |
| <i>circSLC39A10</i> | miR-1252-3p           | 10 |
| <i>circSLC39A10</i> | miR-1258              | 2  |
| <i>circSLC39A10</i> | miR-126-5p            | 6  |
| <i>circSLC39A10</i> | miR-1261              | 2  |
| <i>circSLC39A10</i> | miR-1264              | 1  |

|                     |                                      |    |
|---------------------|--------------------------------------|----|
| <i>circSLC39A10</i> | miR-1267                             | 2  |
| <i>circSLC39A10</i> | miR-127-5p                           | 6  |
| <i>circSLC39A10</i> | miR-1272                             | 16 |
| <i>circSLC39A10</i> | miR-1273e                            | 6  |
| <i>circSLC39A10</i> | miR-1273f                            | 1  |
| <i>circSLC39A10</i> | miR-1273g-5p                         | 5  |
| <i>circSLC39A10</i> | miR-1277-3p                          | 2  |
| <i>circSLC39A10</i> | miR-1277-5p                          | 5  |
| <i>circSLC39A10</i> | miR-128-3p                           | 3  |
| <i>circSLC39A10</i> | miR-1285-5p                          | 3  |
| <i>circSLC39A10</i> | miR-129-5p                           | 4  |
| <i>circSLC39A10</i> | miR-1298-5p                          | 3  |
| <i>circSLC39A10</i> | miR-1299                             | 4  |
| <i>circSLC39A10</i> | miR-1304-3p                          | 2  |
| <i>circSLC39A10</i> | miR-1305                             | 6  |
| <i>circSLC39A10</i> | miR-130b-5p                          | 9  |
| <i>circSLC39A10</i> | miR-1322                             | 16 |
| <i>circSLC39A10</i> | miR-1324                             | 3  |
| <i>circSLC39A10</i> | miR-133a-3p.2/133b                   | 2  |
| <i>circSLC39A10</i> | miR-133a-5p                          | 2  |
| <i>circSLC39A10</i> | miR-1343-3p                          | 2  |
| <i>circSLC39A10</i> | miR-137                              | 3  |
| <i>circSLC39A10</i> | miR-138-2-3p                         | 4  |
| <i>circSLC39A10</i> | miR-138-5p                           | 2  |
| <i>circSLC39A10</i> | miR-140-5p                           | 5  |
| <i>circSLC39A10</i> | miR-141-5p                           | 7  |
| <i>circSLC39A10</i> | miR-142-5p                           | 4  |
| <i>circSLC39A10</i> | miR-143-3p                           | 1  |
| <i>circSLC39A10</i> | miR-145-3p                           | 4  |
| <i>circSLC39A10</i> | miR-1468-3p                          | 5  |
| <i>circSLC39A10</i> | miR-146a-3p                          | 7  |
| <i>circSLC39A10</i> | miR-147a                             | 4  |
| <i>circSLC39A10</i> | miR-148a-5p                          | 3  |
| <i>circSLC39A10</i> | miR-15-5p/16-5p/195-5p/424-5p/497-5p | 5  |
| <i>circSLC39A10</i> | miR-153-3p                           | 6  |
| <i>circSLC39A10</i> | miR-153-5p                           | 10 |
| <i>circSLC39A10</i> | miR-155-5p                           | 3  |
| <i>circSLC39A10</i> | miR-15a-3p                           | 6  |

|                     |                     |   |
|---------------------|---------------------|---|
| <i>circSLC39A10</i> | miR-15b-3p          | 2 |
| <i>circSLC39A10</i> | miR-16-2-3p/195-3p  | 4 |
| <i>circSLC39A10</i> | miR-181-3p/4420     | 6 |
| <i>circSLC39A10</i> | miR-181-5p          | 2 |
| <i>circSLC39A10</i> | miR-182-5p          | 2 |
| <i>circSLC39A10</i> | miR-1827            | 4 |
| <i>circSLC39A10</i> | miR-183-3p          | 1 |
| <i>circSLC39A10</i> | miR-183-5p.1        | 6 |
| <i>circSLC39A10</i> | miR-183-5p.2        | 1 |
| <i>circSLC39A10</i> | miR-185-3p          | 8 |
| <i>circSLC39A10</i> | miR-185-5p          | 1 |
| <i>circSLC39A10</i> | miR-186-5p          | 4 |
| <i>circSLC39A10</i> | miR-1909-3p/6722-3p | 1 |
| <i>circSLC39A10</i> | miR-192-3p          | 3 |
| <i>circSLC39A10</i> | miR-192-5p/215-5p   | 2 |
| <i>circSLC39A10</i> | miR-193b-5p         | 2 |
| <i>circSLC39A10</i> | miR-197-3p          | 5 |
| <i>circSLC39A10</i> | miR-203a-5p         | 5 |
| <i>circSLC39A10</i> | miR-203b-3p         | 3 |
| <i>circSLC39A10</i> | miR-204-3p/4646-5p  | 2 |
| <i>circSLC39A10</i> | miR-204-5p/211-5p   | 2 |
| <i>circSLC39A10</i> | miR-205-5p          | 6 |
| <i>circSLC39A10</i> | miR-2053            | 5 |
| <i>circSLC39A10</i> | miR-2054            | 4 |
| <i>circSLC39A10</i> | miR-210-5p          | 1 |
| <i>circSLC39A10</i> | miR-2113            | 8 |
| <i>circSLC39A10</i> | miR-2115-3p         | 4 |
| <i>circSLC39A10</i> | miR-2116-5p         | 6 |
| <i>circSLC39A10</i> | miR-214-3p/3619-5p  | 5 |
| <i>circSLC39A10</i> | miR-215-3p          | 6 |
| <i>circSLC39A10</i> | miR-216a-5p         | 4 |
| <i>circSLC39A10</i> | miR-216b-5p         | 4 |
| <i>circSLC39A10</i> | miR-219-5p          | 2 |
| <i>circSLC39A10</i> | miR-219a-1-3p       | 2 |
| <i>circSLC39A10</i> | miR-22-5p           | 6 |
| <i>circSLC39A10</i> | miR-2276-5p         | 3 |
| <i>circSLC39A10</i> | miR-23-3p           | 2 |
| <i>circSLC39A10</i> | miR-2355-5p         | 2 |



|                     |                                              |   |
|---------------------|----------------------------------------------|---|
| <i>circSLC39A10</i> | miR-25-3p/32-5p/92-3p/363-3p/367-3p          | 3 |
| <i>circSLC39A10</i> | miR-2681-3p                                  | 9 |
| <i>circSLC39A10</i> | miR-2681-5p                                  | 2 |
| <i>circSLC39A10</i> | miR-26b-3p                                   | 3 |
| <i>circSLC39A10</i> | miR-27-3p                                    | 1 |
| <i>circSLC39A10</i> | miR-2909                                     | 3 |
| <i>circSLC39A10</i> | miR-299-3p                                   | 4 |
| <i>circSLC39A10</i> | miR-29a-5p                                   | 3 |
| <i>circSLC39A10</i> | miR-29b-2-5p                                 | 3 |
| <i>circSLC39A10</i> | miR-30-3p                                    | 5 |
| <i>circSLC39A10</i> | miR-302c-5p                                  | 5 |
| <i>circSLC39A10</i> | miR-3074-5p                                  | 4 |
| <i>circSLC39A10</i> | miR-30b-3p/1273h-5p/3689-3p/6779-5p/6780a-5p | 3 |
| <i>circSLC39A10</i> | miR-30c-3p/6788-5p                           | 3 |
| <i>circSLC39A10</i> | miR-3115                                     | 1 |
| <i>circSLC39A10</i> | miR-3117-5p                                  | 2 |
| <i>circSLC39A10</i> | miR-3120-5p                                  | 5 |
| <i>circSLC39A10</i> | miR-3124-3p                                  | 5 |
| <i>circSLC39A10</i> | miR-3127-5p                                  | 4 |
| <i>circSLC39A10</i> | miR-3129-3p/5583-5p                          | 1 |
| <i>circSLC39A10</i> | miR-3133                                     | 4 |
| <i>circSLC39A10</i> | miR-3136-3p/7155-3p                          | 3 |
| <i>circSLC39A10</i> | miR-3138                                     | 2 |
| <i>circSLC39A10</i> | miR-3143                                     | 5 |
| <i>circSLC39A10</i> | miR-3148                                     | 3 |
| <i>circSLC39A10</i> | miR-3150a-5p/3150b-5p                        | 2 |
| <i>circSLC39A10</i> | miR-3151-3p                                  | 2 |
| <i>circSLC39A10</i> | miR-3152-5p                                  | 1 |
| <i>circSLC39A10</i> | miR-3153/6733-5p/6739-5p                     | 3 |
| <i>circSLC39A10</i> | miR-3156-5p                                  | 8 |
| <i>circSLC39A10</i> | miR-3160-5p                                  | 4 |
| <i>circSLC39A10</i> | miR-3171                                     | 2 |
| <i>circSLC39A10</i> | miR-3184-3p                                  | 1 |
| <i>circSLC39A10</i> | miR-3187-3p                                  | 3 |
| <i>circSLC39A10</i> | miR-3191-5p                                  | 4 |
| <i>circSLC39A10</i> | miR-3192-3p                                  | 1 |
| <i>circSLC39A10</i> | miR-3192-5p                                  | 2 |
| <i>circSLC39A10</i> | miR-323a-5p                                  | 4 |

|                     |                           |    |
|---------------------|---------------------------|----|
| <i>circSLC39A10</i> | miR-325                   | 3  |
| <i>circSLC39A10</i> | miR-326                   | 2  |
| <i>circSLC39A10</i> | miR-33-5p                 | 3  |
| <i>circSLC39A10</i> | miR-335-3p                | 17 |
| <i>circSLC39A10</i> | miR-346                   | 1  |
| <i>circSLC39A10</i> | miR-3607-3p               | 2  |
| <i>circSLC39A10</i> | miR-3607-5p               | 5  |
| <i>circSLC39A10</i> | miR-361-5p                | 3  |
| <i>circSLC39A10</i> | miR-3611                  | 4  |
| <i>circSLC39A10</i> | miR-3613-3p               | 7  |
| <i>circSLC39A10</i> | miR-362-5p/500b-5p        | 2  |
| <i>circSLC39A10</i> | miR-3620-3p               | 5  |
| <i>circSLC39A10</i> | miR-3646                  | 10 |
| <i>circSLC39A10</i> | miR-3657                  | 3  |
| <i>circSLC39A10</i> | miR-3659                  | 2  |
| <i>circSLC39A10</i> | miR-3662                  | 6  |
| <i>circSLC39A10</i> | miR-3663-5p               | 1  |
| <i>circSLC39A10</i> | miR-367-5p                | 2  |
| <i>circSLC39A10</i> | miR-3677-3p               | 3  |
| <i>circSLC39A10</i> | miR-3682-3p               | 7  |
| <i>circSLC39A10</i> | miR-3688-3p               | 2  |
| <i>circSLC39A10</i> | miR-3691-3p               | 3  |
| <i>circSLC39A10</i> | miR-3691-5p               | 4  |
| <i>circSLC39A10</i> | miR-3692-3p               | 3  |
| <i>circSLC39A10</i> | miR-3692-5p               | 1  |
| <i>circSLC39A10</i> | miR-371-5p                | 6  |
| <i>circSLC39A10</i> | miR-371b-5p/373-5p/616-5p | 6  |
| <i>circSLC39A10</i> | miR-372-5p                | 6  |
| <i>circSLC39A10</i> | miR-374a-3p               | 6  |
| <i>circSLC39A10</i> | miR-375                   | 8  |
| <i>circSLC39A10</i> | miR-376b-5p/376c-5p       | 2  |
| <i>circSLC39A10</i> | miR-378j/6839-5p          | 2  |
| <i>circSLC39A10</i> | miR-381-3p                | 4  |
| <i>circSLC39A10</i> | miR-382-3p                | 2  |
| <i>circSLC39A10</i> | miR-383-5p.1              | 2  |
| <i>circSLC39A10</i> | miR-3907                  | 3  |
| <i>circSLC39A10</i> | miR-3912-5p               | 6  |
| <i>circSLC39A10</i> | miR-3914                  | 3  |

|                     |                                              |    |
|---------------------|----------------------------------------------|----|
| <i>circSLC39A10</i> | miR-3918                                     | 5  |
| <i>circSLC39A10</i> | miR-3922-5p                                  | 4  |
| <i>circSLC39A10</i> | miR-3924                                     | 11 |
| <i>circSLC39A10</i> | miR-3926                                     | 3  |
| <i>circSLC39A10</i> | miR-3940-5p/4507                             | 4  |
| <i>circSLC39A10</i> | miR-3973                                     | 2  |
| <i>circSLC39A10</i> | miR-3977                                     | 5  |
| <i>circSLC39A10</i> | miR-410-3p                                   | 2  |
| <i>circSLC39A10</i> | miR-411-3p                                   | 6  |
| <i>circSLC39A10</i> | miR-4255                                     | 3  |
| <i>circSLC39A10</i> | miR-4259                                     | 1  |
| <i>circSLC39A10</i> | miR-4271/4725-3p/6780b-5p                    | 2  |
| <i>circSLC39A10</i> | miR-4273/7156-5p                             | 9  |
| <i>circSLC39A10</i> | miR-4278                                     | 2  |
| <i>circSLC39A10</i> | miR-4282                                     | 7  |
| <i>circSLC39A10</i> | miR-4286                                     | 3  |
| <i>circSLC39A10</i> | miR-4287/4685-3p                             | 2  |
| <i>circSLC39A10</i> | miR-4291                                     | 9  |
| <i>circSLC39A10</i> | miR-4299                                     | 7  |
| <i>circSLC39A10</i> | miR-4307                                     | 2  |
| <i>circSLC39A10</i> | miR-4317                                     | 2  |
| <i>circSLC39A10</i> | miR-4326                                     | 3  |
| <i>circSLC39A10</i> | miR-4327                                     | 4  |
| <i>circSLC39A10</i> | miR-4328                                     | 6  |
| <i>circSLC39A10</i> | miR-433-3p                                   | 12 |
| <i>circSLC39A10</i> | miR-4330                                     | 2  |
| <i>circSLC39A10</i> | miR-4426/4647/4662b                          | 4  |
| <i>circSLC39A10</i> | miR-4427                                     | 1  |
| <i>circSLC39A10</i> | miR-4435                                     | 3  |
| <i>circSLC39A10</i> | miR-4436b-3p/4632-5p/6735-5p/6879-5p/7843-5p |    |
| <i>circSLC39A10</i> | miR-4445-5p                                  | 2  |
| <i>circSLC39A10</i> | miR-4446-5p                                  | 3  |
| <i>circSLC39A10</i> | miR-4452                                     | 1  |
| <i>circSLC39A10</i> | miR-4453/4538                                | 3  |
| <i>circSLC39A10</i> | miR-4456                                     | 7  |
| <i>circSLC39A10</i> | miR-4464/4748                                | 3  |
| <i>circSLC39A10</i> | miR-4469                                     | 2  |
| <i>circSLC39A10</i> | miR-4470                                     | 6  |

|                     |                       |    |
|---------------------|-----------------------|----|
| <i>circSLC39A10</i> | miR-448               | 6  |
| <i>circSLC39A10</i> | miR-4480              | 3  |
| <i>circSLC39A10</i> | miR-4482-3p           | 6  |
| <i>circSLC39A10</i> | miR-4491/4657         | 4  |
| <i>circSLC39A10</i> | miR-4495              | 7  |
| <i>circSLC39A10</i> | miR-449c-3p           | 2  |
| <i>circSLC39A10</i> | miR-4501              | 3  |
| <i>circSLC39A10</i> | miR-4502              | 1  |
| <i>circSLC39A10</i> | miR-4512              | 4  |
| <i>circSLC39A10</i> | miR-452-3p            | 4  |
| <i>circSLC39A10</i> | miR-452-5p/892-3p     | 3  |
| <i>circSLC39A10</i> | miR-4528              | 8  |
| <i>circSLC39A10</i> | miR-4529-5p           | 6  |
| <i>circSLC39A10</i> | miR-4535              | 2  |
| <i>circSLC39A10</i> | miR-4635              | 3  |
| <i>circSLC39A10</i> | miR-4640-5p           | 6  |
| <i>circSLC39A10</i> | miR-4652-3p           | 6  |
| <i>circSLC39A10</i> | miR-4658/6790-5p      | 6  |
| <i>circSLC39A10</i> | miR-4659a-3p/4659b-3p | 11 |
| <i>circSLC39A10</i> | miR-466               | 4  |
| <i>circSLC39A10</i> | miR-4660              | 3  |
| <i>circSLC39A10</i> | miR-4661-3p           | 6  |
| <i>circSLC39A10</i> | miR-4666a-3p          | 4  |
| <i>circSLC39A10</i> | miR-4666a-5p          | 2  |
| <i>circSLC39A10</i> | miR-4668-5p           | 3  |
| <i>circSLC39A10</i> | miR-4669              | 3  |
| <i>circSLC39A10</i> | miR-4670-3p           | 5  |
| <i>circSLC39A10</i> | miR-4677-3p           | 7  |
| <i>circSLC39A10</i> | miR-4677-5p           | 9  |
| <i>circSLC39A10</i> | miR-4678              | 1  |
| <i>circSLC39A10</i> | miR-4679              | 7  |
| <i>circSLC39A10</i> | miR-4680-3p           | 1  |
| <i>circSLC39A10</i> | miR-4682              | 1  |
| <i>circSLC39A10</i> | miR-4684-3p           | 4  |
| <i>circSLC39A10</i> | miR-4691-5p/6792-3p   | 3  |
| <i>circSLC39A10</i> | miR-4693-3p           | 1  |
| <i>circSLC39A10</i> | miR-4693-5p           | 2  |
| <i>circSLC39A10</i> | miR-4694-3p           | 2  |

|                     |                                  |   |
|---------------------|----------------------------------|---|
| <i>circSLC39A10</i> | miR-4698                         | 9 |
| <i>circSLC39A10</i> | miR-4699-5p                      | 2 |
| <i>circSLC39A10</i> | miR-4708-5p                      | 1 |
| <i>circSLC39A10</i> | miR-4710                         | 2 |
| <i>circSLC39A10</i> | miR-4712-3p                      | 8 |
| <i>circSLC39A10</i> | miR-4715-5p                      | 1 |
| <i>circSLC39A10</i> | miR-4716-3p/6794-5p              | 2 |
| <i>circSLC39A10</i> | miR-4723-5p/5698/6870-5p/7111-5p | 2 |
| <i>circSLC39A10</i> | miR-4724-3p                      | 3 |
| <i>circSLC39A10</i> | miR-4728-3p                      | 5 |
| <i>circSLC39A10</i> | miR-4729                         | 5 |
| <i>circSLC39A10</i> | miR-4732-3p                      | 3 |
| <i>circSLC39A10</i> | miR-4743-3p                      | 6 |
| <i>circSLC39A10</i> | miR-4746-3p                      | 2 |
| <i>circSLC39A10</i> | miR-4747-3p                      | 3 |
| <i>circSLC39A10</i> | miR-4749-3p                      | 1 |
| <i>circSLC39A10</i> | miR-4752                         | 6 |
| <i>circSLC39A10</i> | miR-4753-3p                      | 6 |
| <i>circSLC39A10</i> | miR-4753-5p                      | 3 |
| <i>circSLC39A10</i> | miR-4755-5p/5006-3p              | 3 |
| <i>circSLC39A10</i> | miR-4757-3p                      | 2 |
| <i>circSLC39A10</i> | miR-4760-5p/8061                 | 4 |
| <i>circSLC39A10</i> | miR-4761-3p                      | 1 |
| <i>circSLC39A10</i> | miR-4762-3p                      | 2 |
| <i>circSLC39A10</i> | miR-4765                         | 5 |
| <i>circSLC39A10</i> | miR-4768-5p/6833-3p              | 9 |
| <i>circSLC39A10</i> | miR-4769-3p/6817-5p              | 3 |
| <i>circSLC39A10</i> | miR-4772-5p                      | 2 |
| <i>circSLC39A10</i> | miR-4774-3p                      | 1 |
| <i>circSLC39A10</i> | miR-4776-5p                      | 2 |
| <i>circSLC39A10</i> | miR-4778-5p                      | 3 |
| <i>circSLC39A10</i> | miR-4782-5p/5706                 | 4 |
| <i>circSLC39A10</i> | miR-4792                         | 2 |
| <i>circSLC39A10</i> | miR-4798-5p                      | 2 |
| <i>circSLC39A10</i> | miR-4799-5p                      | 6 |
| <i>circSLC39A10</i> | miR-4800-5p                      | 2 |
| <i>circSLC39A10</i> | miR-487a-5p/487b-5p              | 7 |
| <i>circSLC39A10</i> | miR-490-3p                       | 2 |

|                     |                             |    |
|---------------------|-----------------------------|----|
| <i>circSLC39A10</i> | miR-491-3p                  | 4  |
| <i>circSLC39A10</i> | miR-493-3p                  | 2  |
| <i>circSLC39A10</i> | miR-493-5p                  | 4  |
| <i>circSLC39A10</i> | miR-494-3p                  | 5  |
| <i>circSLC39A10</i> | miR-495-3p                  | 4  |
| <i>circSLC39A10</i> | miR-497-3p                  | 3  |
| <i>circSLC39A10</i> | miR-499a-3p/499b-3p         | 2  |
| <i>circSLC39A10</i> | miR-5000-5p                 | 6  |
| <i>circSLC39A10</i> | miR-5003-3p                 | 5  |
| <i>circSLC39A10</i> | miR-501-5p                  | 2  |
| <i>circSLC39A10</i> | miR-5010-3p                 | 8  |
| <i>circSLC39A10</i> | miR-5010-5p                 | 2  |
| <i>circSLC39A10</i> | miR-503-5p                  | 5  |
| <i>circSLC39A10</i> | miR-504-3p                  | 1  |
| <i>circSLC39A10</i> | miR-504-5p.1                | 3  |
| <i>circSLC39A10</i> | miR-505-5p                  | 2  |
| <i>circSLC39A10</i> | miR-508-3p                  | 2  |
| <i>circSLC39A10</i> | miR-5087                    | 2  |
| <i>circSLC39A10</i> | miR-5094                    | 3  |
| <i>circSLC39A10</i> | miR-5096                    | 3  |
| <i>circSLC39A10</i> | miR-510-3p                  | 5  |
| <i>circSLC39A10</i> | miR-5100                    | 6  |
| <i>circSLC39A10</i> | miR-513a-3p/513c-3p/3606-3p | 9  |
| <i>circSLC39A10</i> | miR-513a-5p                 | 1  |
| <i>circSLC39A10</i> | miR-513b-3p                 | 5  |
| <i>circSLC39A10</i> | miR-513c-5p/514b-5p         | 6  |
| <i>circSLC39A10</i> | miR-515-5p/519e-5p          | 7  |
| <i>circSLC39A10</i> | miR-516b-5p                 | 4  |
| <i>circSLC39A10</i> | miR-5187-3p                 | 1  |
| <i>circSLC39A10</i> | miR-518a-5p/527             | 4  |
| <i>circSLC39A10</i> | miR-518c-5p                 | 2  |
| <i>circSLC39A10</i> | miR-518e-3p                 | 4  |
| <i>circSLC39A10</i> | miR-5192                    | 1  |
| <i>circSLC39A10</i> | miR-519d-5p                 | 10 |
| <i>circSLC39A10</i> | miR-520g-3p                 | 2  |
| <i>circSLC39A10</i> | miR-522-3p                  | 2  |
| <i>circSLC39A10</i> | miR-524-5p                  | 3  |
| <i>circSLC39A10</i> | miR-526b-5p                 | 3  |

|                     |                                      |    |
|---------------------|--------------------------------------|----|
| <i>circSLC39A10</i> | miR-539-3p                           | 3  |
| <i>circSLC39A10</i> | miR-539-5p                           | 4  |
| <i>circSLC39A10</i> | miR-543                              | 2  |
| <i>circSLC39A10</i> | miR-548ai/548ag/548ba/570-5p         | 3  |
| <i>circSLC39A10</i> | miR-548aj-5p/548f-5p/548g-5p/548x-5p | 5  |
| <i>circSLC39A10</i> | miR-548ap-3p/548aa/548t-3p           | 3  |
| <i>circSLC39A10</i> | miR-548as-3p                         | 3  |
| <i>circSLC39A10</i> | miR-548at-5p                         | 7  |
| <i>circSLC39A10</i> | miR-548aw                            | 4  |
| <i>circSLC39A10</i> | miR-548ay-3p/548at-3p                | 3  |
| <i>circSLC39A10</i> | miR-548az-5p/548t-5p                 | 7  |
| <i>circSLC39A10</i> | miR-548c-3p                          | 5  |
| <i>circSLC39A10</i> | miR-548g-3p                          | 7  |
| <i>circSLC39A10</i> | miR-548m                             | 3  |
| <i>circSLC39A10</i> | miR-548n                             | 7  |
| <i>circSLC39A10</i> | miR-548p                             | 4  |
| <i>circSLC39A10</i> | miR-548q                             | 7  |
| <i>circSLC39A10</i> | miR-548s                             | 3  |
| <i>circSLC39A10</i> | miR-551b-5p                          | 3  |
| <i>circSLC39A10</i> | miR-552-5p                           | 6  |
| <i>circSLC39A10</i> | miR-5571-5p                          | 3  |
| <i>circSLC39A10</i> | miR-5587-5p                          | 10 |
| <i>circSLC39A10</i> | miR-561-3p                           | 7  |
| <i>circSLC39A10</i> | miR-567                              | 6  |
| <i>circSLC39A10</i> | miR-5680                             | 7  |
| <i>circSLC39A10</i> | miR-5692a                            | 5  |
| <i>circSLC39A10</i> | miR-5695                             | 10 |
| <i>circSLC39A10</i> | miR-5696                             | 10 |
| <i>circSLC39A10</i> | miR-570-3p                           | 2  |
| <i>circSLC39A10</i> | miR-5700                             | 3  |
| <i>circSLC39A10</i> | miR-571                              | 2  |
| <i>circSLC39A10</i> | miR-574-3p                           | 5  |
| <i>circSLC39A10</i> | miR-574-5p                           | 2  |
| <i>circSLC39A10</i> | miR-576-3p                           | 2  |
| <i>circSLC39A10</i> | miR-579-3p                           | 10 |
| <i>circSLC39A10</i> | miR-580-3p                           | 12 |
| <i>circSLC39A10</i> | miR-580-5p                           | 11 |
| <i>circSLC39A10</i> | miR-584-5p                           | 5  |

|                     |                    |   |
|---------------------|--------------------|---|
| <i>circSLC39A10</i> | miR-586            | 2 |
| <i>circSLC39A10</i> | miR-587            | 3 |
| <i>circSLC39A10</i> | miR-588            | 3 |
| <i>circSLC39A10</i> | miR-590-3p         | 8 |
| <i>circSLC39A10</i> | miR-591            | 4 |
| <i>circSLC39A10</i> | miR-592            | 4 |
| <i>circSLC39A10</i> | miR-593-3p         | 4 |
| <i>circSLC39A10</i> | miR-593-5p         | 1 |
| <i>circSLC39A10</i> | miR-598-5p         | 2 |
| <i>circSLC39A10</i> | miR-599            | 4 |
| <i>circSLC39A10</i> | miR-606            | 3 |
| <i>circSLC39A10</i> | miR-607            | 2 |
| <i>circSLC39A10</i> | miR-6071           | 1 |
| <i>circSLC39A10</i> | miR-6072/6891-3p   | 4 |
| <i>circSLC39A10</i> | miR-6077           | 2 |
| <i>circSLC39A10</i> | miR-6079           | 2 |
| <i>circSLC39A10</i> | miR-6083           | 1 |
| <i>circSLC39A10</i> | miR-6124           | 3 |
| <i>circSLC39A10</i> | miR-6126           | 2 |
| <i>circSLC39A10</i> | miR-6128           | 2 |
| <i>circSLC39A10</i> | miR-6131           | 2 |
| <i>circSLC39A10</i> | miR-6132/6836-5p   | 1 |
| <i>circSLC39A10</i> | miR-616-3p         | 3 |
| <i>circSLC39A10</i> | miR-619-3p         | 4 |
| <i>circSLC39A10</i> | miR-619-5p/6506-5p | 2 |
| <i>circSLC39A10</i> | miR-623            | 2 |
| <i>circSLC39A10</i> | miR-625-5p         | 2 |
| <i>circSLC39A10</i> | miR-626/6876-3p    | 4 |
| <i>circSLC39A10</i> | miR-627-3p         | 8 |
| <i>circSLC39A10</i> | miR-628-3p         | 3 |
| <i>circSLC39A10</i> | miR-629-3p         | 5 |
| <i>circSLC39A10</i> | miR-629-5p         | 2 |
| <i>circSLC39A10</i> | miR-631/3661       | 2 |
| <i>circSLC39A10</i> | miR-632/4288       | 4 |
| <i>circSLC39A10</i> | miR-636            | 4 |
| <i>circSLC39A10</i> | miR-642a-5p        | 3 |
| <i>circSLC39A10</i> | miR-645            | 2 |
| <i>circSLC39A10</i> | miR-646            | 5 |



|                     |                     |    |
|---------------------|---------------------|----|
| <i>circSLC39A10</i> | miR-649             | 2  |
| <i>circSLC39A10</i> | miR-6505-5p         | 2  |
| <i>circSLC39A10</i> | miR-6507-3p         | 1  |
| <i>circSLC39A10</i> | miR-6508-3p         | 6  |
| <i>circSLC39A10</i> | miR-6511-5p         | 1  |
| <i>circSLC39A10</i> | miR-6512-5p         | 4  |
| <i>circSLC39A10</i> | miR-6516-3p         | 7  |
| <i>circSLC39A10</i> | miR-653-3p          | 6  |
| <i>circSLC39A10</i> | miR-656-5p          | 4  |
| <i>circSLC39A10</i> | miR-662             | 2  |
| <i>circSLC39A10</i> | miR-663b            | 3  |
| <i>circSLC39A10</i> | miR-664a-3p         | 3  |
| <i>circSLC39A10</i> | miR-670-3p          | 8  |
| <i>circSLC39A10</i> | miR-6715a-3p        | 3  |
| <i>circSLC39A10</i> | miR-6715b-3p        | 1  |
| <i>circSLC39A10</i> | miR-6716-5p         | 3  |
| <i>circSLC39A10</i> | miR-6731-5p/8085    | 1  |
| <i>circSLC39A10</i> | miR-6732-5p         | 2  |
| <i>circSLC39A10</i> | miR-6739-3p         | 5  |
| <i>circSLC39A10</i> | miR-6742-3p         | 4  |
| <i>circSLC39A10</i> | miR-6749-3p         | 3  |
| <i>circSLC39A10</i> | miR-6753-5p         | 4  |
| <i>circSLC39A10</i> | miR-6757-3p         | 1  |
| <i>circSLC39A10</i> | miR-676-5p          | 13 |
| <i>circSLC39A10</i> | miR-6764-3p/6824-3p | 2  |
| <i>circSLC39A10</i> | miR-6765-5p         | 4  |
| <i>circSLC39A10</i> | miR-6773-3p         | 6  |
| <i>circSLC39A10</i> | miR-6776-5p         | 4  |
| <i>circSLC39A10</i> | miR-6780a-3p        | 5  |
| <i>circSLC39A10</i> | miR-6789-5p         | 2  |
| <i>circSLC39A10</i> | miR-6802-3p         | 2  |
| <i>circSLC39A10</i> | miR-6805-5p         | 2  |
| <i>circSLC39A10</i> | miR-6806-5p         | 2  |
| <i>circSLC39A10</i> | miR-6809-3p         | 9  |
| <i>circSLC39A10</i> | miR-6814-5p         | 3  |
| <i>circSLC39A10</i> | miR-6817-3p         | 6  |
| <i>circSLC39A10</i> | miR-6818-3p         | 2  |
| <i>circSLC39A10</i> | miR-6818-5p         | 4  |

|                     |                     |    |
|---------------------|---------------------|----|
| <i>circSLC39A10</i> | miR-6824-5p         | 2  |
| <i>circSLC39A10</i> | miR-6827-5p         | 4  |
| <i>circSLC39A10</i> | miR-6828-3p         | 1  |
| <i>circSLC39A10</i> | miR-6832-3p         | 2  |
| <i>circSLC39A10</i> | miR-6833-5p         | 6  |
| <i>circSLC39A10</i> | miR-6836-3p         | 2  |
| <i>circSLC39A10</i> | miR-6839-3p         | 4  |
| <i>circSLC39A10</i> | miR-6843-3p/6848-3p | 4  |
| <i>circSLC39A10</i> | miR-6845-3p         | 3  |
| <i>circSLC39A10</i> | miR-6847-3p         | 4  |
| <i>circSLC39A10</i> | miR-6852-5p         | 4  |
| <i>circSLC39A10</i> | miR-6853-3p         | 4  |
| <i>circSLC39A10</i> | miR-6861-5p         | 4  |
| <i>circSLC39A10</i> | miR-6864-5p         | 2  |
| <i>circSLC39A10</i> | miR-6865-3p         | 3  |
| <i>circSLC39A10</i> | miR-6870-3p         | 1  |
| <i>circSLC39A10</i> | miR-6871-5p         | 4  |
| <i>circSLC39A10</i> | miR-6873-3p         | 9  |
| <i>circSLC39A10</i> | miR-6875-3p         | 11 |
| <i>circSLC39A10</i> | miR-6878-5p         | 1  |
| <i>circSLC39A10</i> | miR-6881-3p         | 5  |
| <i>circSLC39A10</i> | miR-6885-3p         | 4  |
| <i>circSLC39A10</i> | miR-6888-3p         | 5  |
| <i>circSLC39A10</i> | miR-6892-3p         | 3  |
| <i>circSLC39A10</i> | miR-6895-3p         | 4  |
| <i>circSLC39A10</i> | miR-6895-5p         | 4  |
| <i>circSLC39A10</i> | miR-7-5p            | 2  |
| <i>circSLC39A10</i> | miR-7106-3p         | 2  |
| <i>circSLC39A10</i> | miR-711             | 2  |
| <i>circSLC39A10</i> | miR-7110-3p         | 6  |
| <i>circSLC39A10</i> | miR-7111-3p         | 5  |
| <i>circSLC39A10</i> | miR-7113-3p         | 2  |
| <i>circSLC39A10</i> | miR-7152-3p         | 1  |
| <i>circSLC39A10</i> | miR-7152-5p         | 4  |
| <i>circSLC39A10</i> | miR-7153-3p         | 1  |
| <i>circSLC39A10</i> | miR-7154-5p         | 12 |
| <i>circSLC39A10</i> | miR-7158-3p         | 3  |
| <i>circSLC39A10</i> | miR-7158-5p         | 4  |

|                     |                                       |   |
|---------------------|---------------------------------------|---|
| <i>circSLC39A10</i> | miR-7159-3p                           | 6 |
| <i>circSLC39A10</i> | miR-7160-3p                           | 4 |
| <i>circSLC39A10</i> | miR-7161-3p                           | 6 |
| <i>circSLC39A10</i> | miR-767-5p                            | 2 |
| <i>circSLC39A10</i> | miR-770-5p                            | 2 |
| <i>circSLC39A10</i> | miR-7706                              | 4 |
| <i>circSLC39A10</i> | miR-7843-3p                           | 6 |
| <i>circSLC39A10</i> | miR-7851-3p                           | 4 |
| <i>circSLC39A10</i> | miR-7855-5p                           | 7 |
| <i>circSLC39A10</i> | miR-7978                              | 7 |
| <i>circSLC39A10</i> | miR-8056                              | 4 |
| <i>circSLC39A10</i> | miR-8057                              | 3 |
| <i>circSLC39A10</i> | miR-8063                              | 9 |
| <i>circSLC39A10</i> | miR-8068                              | 7 |
| <i>circSLC39A10</i> | miR-8069                              | 5 |
| <i>circSLC39A10</i> | miR-873-5p.1                          | 1 |
| <i>circSLC39A10</i> | miR-876-3p                            | 4 |
| <i>circSLC39A10</i> | miR-885-5p                            | 3 |
| <i>circSLC39A10</i> | miR-922                               | 5 |
| <i>circSLC39A10</i> | miR-93-3p                             | 1 |
| <i>circSLC39A10</i> | miR-939-3p                            | 4 |
| <i>circSLC39A10</i> | miR-942-5p                            | 9 |
| <i>circSLC39A10</i> | miR-944                               | 4 |
| <i>circSLC39A10</i> | miR-96-3p                             | 9 |
| <i>circSLC39A10</i> | miR-96-5p/1271-5p                     | 2 |
| <i>circSLC39A10</i> | let-7a-3p/let-7b-3p/let-7f-1-3p/98-3p | 3 |
| <i>circSLC39A10</i> | let-7f-2-3p/1185-3p                   | 3 |
| <i>circSLC39A10</i> | miR-101-5p                            | 1 |
| <i>circSLC39A10</i> | miR-103-3p/107                        | 4 |
| <i>circSLC39A10</i> | miR-1180-3p                           | 1 |
| <i>circSLC39A10</i> | miR-1183                              | 1 |
| <i>circSLC39A10</i> | miR-1208                              | 2 |
| <i>circSLC39A10</i> | miR-1227-3p                           | 2 |
| <i>circSLC39A10</i> | miR-1227-5p                           | 1 |
| <i>circSLC39A10</i> | miR-1233-3p                           | 2 |
| <i>circSLC39A10</i> | miR-1236-3p                           | 2 |
| <i>circSLC39A10</i> | miR-1237-3p                           | 2 |
| <i>circSLC39A10</i> | miR-1245a/8079                        | 3 |

|                     |                     |   |
|---------------------|---------------------|---|
| <i>circSLC39A10</i> | miR-1248            | 2 |
| <i>circSLC39A10</i> | miR-1249-5p/6797-5p | 2 |
| <i>circSLC39A10</i> | miR-1252-5p         | 1 |
| <i>circSLC39A10</i> | miR-1266-3p         | 2 |
| <i>circSLC39A10</i> | miR-1268a/1268b     | 1 |
| <i>circSLC39A10</i> | miR-127-3p          | 2 |
| <i>circSLC39A10</i> | miR-1270            | 2 |
| <i>circSLC39A10</i> | miR-1273g-3p        | 2 |
| <i>circSLC39A10</i> | miR-1278            | 1 |
| <i>circSLC39A10</i> | miR-1279            | 2 |
| <i>circSLC39A10</i> | miR-128-1-5p        | 2 |
| <i>circSLC39A10</i> | miR-1288-5p         | 2 |
| <i>circSLC39A10</i> | miR-1298-3p         | 1 |
| <i>circSLC39A10</i> | miR-1301-3p         | 2 |
| <i>circSLC39A10</i> | miR-132-5p          | 2 |
| <i>circSLC39A10</i> | miR-1323            | 1 |
| <i>circSLC39A10</i> | miR-134-5p          | 2 |
| <i>circSLC39A10</i> | miR-139-3p          | 2 |
| <i>circSLC39A10</i> | miR-139-5p          | 2 |
| <i>circSLC39A10</i> | miR-140-3p.2        | 2 |
| <i>circSLC39A10</i> | miR-142-3p.1        | 1 |
| <i>circSLC39A10</i> | miR-143-5p          | 2 |
| <i>circSLC39A10</i> | miR-145-5p          | 1 |
| <i>circSLC39A10</i> | miR-148b-5p/6874-3p | 1 |
| <i>circSLC39A10</i> | miR-154-3p/487-3p   | 2 |
| <i>circSLC39A10</i> | miR-155-3p          | 1 |
| <i>circSLC39A10</i> | miR-19-5p           | 2 |
| <i>circSLC39A10</i> | miR-190-5p          | 2 |
| <i>circSLC39A10</i> | miR-1910-5p         | 1 |
| <i>circSLC39A10</i> | miR-1911-3p         | 3 |
| <i>circSLC39A10</i> | miR-194-3p          | 1 |
| <i>circSLC39A10</i> | miR-194-5p          | 1 |
| <i>circSLC39A10</i> | miR-1976            | 1 |
| <i>circSLC39A10</i> | miR-199-3p          | 1 |
| <i>circSLC39A10</i> | miR-202-3p          | 1 |
| <i>circSLC39A10</i> | miR-202-5p          | 1 |
| <i>circSLC39A10</i> | miR-203a-3p.1       | 2 |
| <i>circSLC39A10</i> | miR-203b-5p/6718-5p | 1 |

|                     |                      |   |
|---------------------|----------------------|---|
| <i>circSLC39A10</i> | miR-2052             | 2 |
| <i>circSLC39A10</i> | miR-208-5p           | 1 |
| <i>circSLC39A10</i> | miR-20b-3p           | 1 |
| <i>circSLC39A10</i> | miR-211-3p           | 2 |
| <i>circSLC39A10</i> | miR-2115-5p          | 2 |
| <i>circSLC39A10</i> | miR-2117             | 3 |
| <i>circSLC39A10</i> | miR-212-5p           | 1 |
| <i>circSLC39A10</i> | miR-216b-3p          | 1 |
| <i>circSLC39A10</i> | miR-22-3p            | 1 |
| <i>circSLC39A10</i> | miR-223-3p           | 2 |
| <i>circSLC39A10</i> | miR-223-5p           | 1 |
| <i>circSLC39A10</i> | miR-2278             | 1 |
| <i>circSLC39A10</i> | miR-2392             | 2 |
| <i>circSLC39A10</i> | miR-2467-5p          | 1 |
| <i>circSLC39A10</i> | miR-26-3p            | 2 |
| <i>circSLC39A10</i> | miR-26-5p            | 1 |
| <i>circSLC39A10</i> | miR-29b-1-5p         | 2 |
| <i>circSLC39A10</i> | miR-302a-5p          | 1 |
| <i>circSLC39A10</i> | miR-302c-3p.2/520-3p | 1 |
| <i>circSLC39A10</i> | miR-302f             | 3 |
| <i>circSLC39A10</i> | miR-3065-3p          | 3 |
| <i>circSLC39A10</i> | miR-3065-5p          | 2 |
| <i>circSLC39A10</i> | miR-31-5p            | 1 |
| <i>circSLC39A10</i> | miR-3120-3p          | 1 |
| <i>circSLC39A10</i> | miR-3121-3p          | 1 |
| <i>circSLC39A10</i> | miR-3121-5p          | 1 |
| <i>circSLC39A10</i> | miR-3122/3913-5p     | 1 |
| <i>circSLC39A10</i> | miR-3126-3p          | 1 |
| <i>circSLC39A10</i> | miR-3130-3p          | 1 |
| <i>circSLC39A10</i> | miR-3135a            | 2 |
| <i>circSLC39A10</i> | miR-3136-5p/4439     | 2 |
| <i>circSLC39A10</i> | miR-3137             | 1 |
| <i>circSLC39A10</i> | miR-3140-3p          | 1 |
| <i>circSLC39A10</i> | miR-3141             | 1 |
| <i>circSLC39A10</i> | miR-3144-3p          | 1 |
| <i>circSLC39A10</i> | miR-3154             | 2 |
| <i>circSLC39A10</i> | miR-3159             | 1 |
| <i>circSLC39A10</i> | miR-3161             | 1 |

|                     |                                   |   |
|---------------------|-----------------------------------|---|
| <i>circSLC39A10</i> | miR-3162-5p                       | 1 |
| <i>circSLC39A10</i> | miR-3164                          | 2 |
| <i>circSLC39A10</i> | miR-3168                          | 1 |
| <i>circSLC39A10</i> | miR-3179                          | 1 |
| <i>circSLC39A10</i> | miR-3180-5p                       | 1 |
| <i>circSLC39A10</i> | miR-3182                          | 1 |
| <i>circSLC39A10</i> | miR-3185                          | 2 |
| <i>circSLC39A10</i> | miR-3188                          | 1 |
| <i>circSLC39A10</i> | miR-3189-3p                       | 1 |
| <i>circSLC39A10</i> | miR-320                           | 2 |
| <i>circSLC39A10</i> | miR-3200-5p                       | 1 |
| <i>circSLC39A10</i> | miR-3201/4791                     | 1 |
| <i>circSLC39A10</i> | miR-320e                          | 1 |
| <i>circSLC39A10</i> | miR-323b-3p                       | 1 |
| <i>circSLC39A10</i> | miR-324-5p                        | 1 |
| <i>circSLC39A10</i> | miR-330-3p.2                      | 2 |
| <i>circSLC39A10</i> | miR-335-5p                        | 1 |
| <i>circSLC39A10</i> | miR-337-5p                        | 1 |
| <i>circSLC39A10</i> | miR-338-3p                        | 1 |
| <i>circSLC39A10</i> | miR-33a-3p                        | 1 |
| <i>circSLC39A10</i> | miR-34-5p/449-5p                  | 2 |
| <i>circSLC39A10</i> | miR-34b-3p                        | 4 |
| <i>circSLC39A10</i> | miR-34c-3p                        | 4 |
| <i>circSLC39A10</i> | miR-361-3p                        | 2 |
| <i>circSLC39A10</i> | miR-3614-3p                       | 1 |
| <i>circSLC39A10</i> | miR-365-3p                        | 1 |
| <i>circSLC39A10</i> | miR-3653-3p                       | 2 |
| <i>circSLC39A10</i> | miR-3653-5p                       | 1 |
| <i>circSLC39A10</i> | miR-3674                          | 1 |
| <i>circSLC39A10</i> | miR-3675-5p                       | 1 |
| <i>circSLC39A10</i> | miR-3685                          | 1 |
| <i>circSLC39A10</i> | miR-3688-5p                       | 1 |
| <i>circSLC39A10</i> | miR-3689a-5p/3689b-5p/3689e/3689f | 3 |
| <i>circSLC39A10</i> | miR-374-5p                        | 1 |
| <i>circSLC39A10</i> | miR-374b-3p                       | 1 |
| <i>circSLC39A10</i> | miR-376a-2-5p                     | 1 |
| <i>circSLC39A10</i> | miR-376a-5p                       | 1 |
| <i>circSLC39A10</i> | miR-382-5p                        | 2 |

|                     |                     |   |
|---------------------|---------------------|---|
| <i>circSLC39A10</i> | miR-383-3p          | 3 |
| <i>circSLC39A10</i> | miR-383-5p.2        | 3 |
| <i>circSLC39A10</i> | miR-384             | 1 |
| <i>circSLC39A10</i> | miR-3920            | 1 |
| <i>circSLC39A10</i> | miR-3925-3p         | 1 |
| <i>circSLC39A10</i> | miR-3929/4419b/4478 | 1 |
| <i>circSLC39A10</i> | miR-3935            | 1 |
| <i>circSLC39A10</i> | miR-3942-3p         | 4 |
| <i>circSLC39A10</i> | miR-3944-5p         | 2 |
| <i>circSLC39A10</i> | miR-3975            | 1 |
| <i>circSLC39A10</i> | miR-409-3p          | 1 |
| <i>circSLC39A10</i> | miR-411-5p.1        | 1 |
| <i>circSLC39A10</i> | miR-423-5p          | 2 |
| <i>circSLC39A10</i> | miR-4251            | 1 |
| <i>circSLC39A10</i> | miR-4252            | 2 |
| <i>circSLC39A10</i> | miR-4263            | 5 |
| <i>circSLC39A10</i> | miR-4266            | 2 |
| <i>circSLC39A10</i> | miR-4274            | 1 |
| <i>circSLC39A10</i> | miR-4277            | 5 |
| <i>circSLC39A10</i> | miR-4279            | 3 |
| <i>circSLC39A10</i> | miR-4289            | 1 |
| <i>circSLC39A10</i> | miR-4297/5581-5p    | 2 |
| <i>circSLC39A10</i> | miR-4301            | 1 |
| <i>circSLC39A10</i> | miR-4302            | 1 |
| <i>circSLC39A10</i> | miR-4310/7157-5p    | 3 |
| <i>circSLC39A10</i> | miR-4318            | 3 |
| <i>circSLC39A10</i> | miR-432-3p          | 2 |
| <i>circSLC39A10</i> | miR-4320            | 2 |
| <i>circSLC39A10</i> | miR-4324            | 1 |
| <i>circSLC39A10</i> | miR-4329            | 1 |
| <i>circSLC39A10</i> | miR-4421/5699-3p    | 1 |
| <i>circSLC39A10</i> | miR-4422            | 2 |
| <i>circSLC39A10</i> | miR-4436b-5p        | 2 |
| <i>circSLC39A10</i> | miR-4450            | 2 |
| <i>circSLC39A10</i> | miR-4473            | 1 |
| <i>circSLC39A10</i> | miR-4474-3p         | 1 |
| <i>circSLC39A10</i> | miR-4477a           | 2 |
| <i>circSLC39A10</i> | miR-4496            | 2 |

|                     |                       |   |
|---------------------|-----------------------|---|
| <i>circSLC39A10</i> | miR-4503              | 2 |
| <i>circSLC39A10</i> | miR-4506              | 1 |
| <i>circSLC39A10</i> | miR-450a-1-3p         | 1 |
| <i>circSLC39A10</i> | miR-4517              | 1 |
| <i>circSLC39A10</i> | miR-4519              | 1 |
| <i>circSLC39A10</i> | miR-4523              | 2 |
| <i>circSLC39A10</i> | miR-4524b-3p          | 1 |
| <i>circSLC39A10</i> | miR-4530              | 1 |
| <i>circSLC39A10</i> | miR-4531              | 2 |
| <i>circSLC39A10</i> | miR-4539              | 1 |
| <i>circSLC39A10</i> | miR-4540              | 1 |
| <i>circSLC39A10</i> | miR-455-3p.1          | 1 |
| <i>circSLC39A10</i> | miR-455-3p.2          | 2 |
| <i>circSLC39A10</i> | miR-455-5p            | 3 |
| <i>circSLC39A10</i> | miR-4641              | 3 |
| <i>circSLC39A10</i> | miR-4645-3p           | 3 |
| <i>circSLC39A10</i> | miR-4645-5p/4673      | 3 |
| <i>circSLC39A10</i> | miR-4659a-5p/4659b-5p | 2 |
| <i>circSLC39A10</i> | miR-4662a-3p          | 1 |
| <i>circSLC39A10</i> | miR-4664-3p           | 1 |
| <i>circSLC39A10</i> | miR-4666b             | 1 |
| <i>circSLC39A10</i> | miR-4668-3p           | 2 |
| <i>circSLC39A10</i> | miR-4671-3p           | 1 |
| <i>circSLC39A10</i> | miR-4683              | 2 |
| <i>circSLC39A10</i> | miR-4688/6743-5p      | 2 |
| <i>circSLC39A10</i> | miR-4690-5p           | 2 |
| <i>circSLC39A10</i> | miR-4691-3p           | 1 |
| <i>circSLC39A10</i> | miR-4695-5p           | 3 |
| <i>circSLC39A10</i> | miR-4696              | 1 |
| <i>circSLC39A10</i> | miR-4697-3p           | 2 |
| <i>circSLC39A10</i> | miR-4703-3p           | 1 |
| <i>circSLC39A10</i> | miR-4704-3p           | 2 |
| <i>circSLC39A10</i> | miR-4708-3p           | 2 |
| <i>circSLC39A10</i> | miR-4709-3p           | 1 |
| <i>circSLC39A10</i> | miR-4711-5p           | 1 |
| <i>circSLC39A10</i> | miR-4715-3p           | 2 |
| <i>circSLC39A10</i> | miR-4716-5p           | 1 |
| <i>circSLC39A10</i> | miR-4719              | 3 |



|                     |                             |   |
|---------------------|-----------------------------|---|
| <i>circSLC39A10</i> | miR-4720-3p                 | 1 |
| <i>circSLC39A10</i> | miR-4724-5p                 | 4 |
| <i>circSLC39A10</i> | miR-4731-3p/4801            | 1 |
| <i>circSLC39A10</i> | miR-4735-5p                 | 1 |
| <i>circSLC39A10</i> | miR-4737                    | 2 |
| <i>circSLC39A10</i> | miR-4750-3p                 | 2 |
| <i>circSLC39A10</i> | miR-4760-3p                 | 1 |
| <i>circSLC39A10</i> | miR-4762-5p                 | 2 |
| <i>circSLC39A10</i> | miR-4764-3p                 | 1 |
| <i>circSLC39A10</i> | miR-4766-3p                 | 3 |
| <i>circSLC39A10</i> | miR-4766-5p                 | 2 |
| <i>circSLC39A10</i> | miR-4775                    | 2 |
| <i>circSLC39A10</i> | miR-4779                    | 3 |
| <i>circSLC39A10</i> | miR-4781-3p                 | 1 |
| <i>circSLC39A10</i> | miR-4786-3p                 | 1 |
| <i>circSLC39A10</i> | miR-4789-5p                 | 3 |
| <i>circSLC39A10</i> | miR-4790-3p                 | 5 |
| <i>circSLC39A10</i> | miR-4793-3p                 | 1 |
| <i>circSLC39A10</i> | miR-4793-5p                 | 1 |
| <i>circSLC39A10</i> | miR-4795-3p                 | 1 |
| <i>circSLC39A10</i> | miR-4796-5p                 | 2 |
| <i>circSLC39A10</i> | miR-4802-5p                 | 2 |
| <i>circSLC39A10</i> | miR-4804-3p                 | 1 |
| <i>circSLC39A10</i> | miR-483-5p                  | 1 |
| <i>circSLC39A10</i> | miR-484/3155                | 5 |
| <i>circSLC39A10</i> | miR-485-5p                  | 1 |
| <i>circSLC39A10</i> | miR-486-3p                  | 1 |
| <i>circSLC39A10</i> | miR-488-3p                  | 2 |
| <i>circSLC39A10</i> | miR-490-5p                  | 2 |
| <i>circSLC39A10</i> | miR-495-5p                  | 2 |
| <i>circSLC39A10</i> | miR-5007-3p                 | 2 |
| <i>circSLC39A10</i> | miR-500a-3p                 | 1 |
| <i>circSLC39A10</i> | miR-5011-3p                 | 1 |
| <i>circSLC39A10</i> | miR-5011-5p                 | 1 |
| <i>circSLC39A10</i> | miR-502-5p                  | 1 |
| <i>circSLC39A10</i> | miR-512-3p                  | 1 |
| <i>circSLC39A10</i> | miR-516a-3p/516b-3p/7162-5p | 2 |
| <i>circSLC39A10</i> | miR-5188                    | 2 |

|                     |                                                                  |   |
|---------------------|------------------------------------------------------------------|---|
| <i>circSLC39A10</i> | miR-5190                                                         | 3 |
| <i>circSLC39A10</i> | miR-5193                                                         | 2 |
| <i>circSLC39A10</i> | miR-5194                                                         | 2 |
| <i>circSLC39A10</i> | miR-5196-3p                                                      | 1 |
| <i>circSLC39A10</i> | miR-5197-3p                                                      | 2 |
| <i>circSLC39A10</i> | miR-520g-5p                                                      | 1 |
| <i>circSLC39A10</i> | miR-525-5p                                                       | 2 |
| <i>circSLC39A10</i> | miR-532-5p                                                       | 4 |
| <i>circSLC39A10</i> | miR-541-5p                                                       | 1 |
| <i>circSLC39A10</i> | miR-544b                                                         | 1 |
| <i>circSLC39A10</i> | miR-548ac/548bb-3p/548d-3p/548h-3p/548z                          | 2 |
| <i>circSLC39A10</i> | miR-548ao-5p/548ax                                               | 1 |
| <i>circSLC39A10</i> | miR-548aq-3p/548am-3p/548aj-3p/548ah-3p/548ae-3p/548j-3p/548x-3p | 2 |
| <i>circSLC39A10</i> | miR-548au-3p                                                     | 2 |
| <i>circSLC39A10</i> | miR-548av-3p                                                     | 2 |
| <i>circSLC39A10</i> | miR-548az-3p/548ar-3p/548a-3p/548e-3p/548f-3p                    | 2 |
| <i>circSLC39A10</i> | miR-5571-3p                                                      | 1 |
| <i>circSLC39A10</i> | miR-5579-5p                                                      | 3 |
| <i>circSLC39A10</i> | miR-5580-3p                                                      | 1 |
| <i>circSLC39A10</i> | miR-5581-3p                                                      | 2 |
| <i>circSLC39A10</i> | miR-5582-3p                                                      | 2 |
| <i>circSLC39A10</i> | miR-5583-3p                                                      | 1 |
| <i>circSLC39A10</i> | miR-5584-3p                                                      | 1 |
| <i>circSLC39A10</i> | miR-5585-5p                                                      | 1 |
| <i>circSLC39A10</i> | miR-5586-3p                                                      | 1 |
| <i>circSLC39A10</i> | miR-5586-5p                                                      | 7 |
| <i>circSLC39A10</i> | miR-5590-5p                                                      | 2 |
| <i>circSLC39A10</i> | miR-5684                                                         | 1 |
| <i>circSLC39A10</i> | miR-569                                                          | 1 |
| <i>circSLC39A10</i> | miR-5690                                                         | 1 |
| <i>circSLC39A10</i> | miR-5693                                                         | 1 |
| <i>circSLC39A10</i> | miR-5694                                                         | 3 |
| <i>circSLC39A10</i> | miR-5697                                                         | 1 |
| <i>circSLC39A10</i> | miR-5701                                                         | 1 |
| <i>circSLC39A10</i> | miR-5702                                                         | 2 |
| <i>circSLC39A10</i> | miR-573/3616-5p                                                  | 2 |
| <i>circSLC39A10</i> | miR-575/4676-5p                                                  | 1 |
| <i>circSLC39A10</i> | miR-576-5p                                                       | 5 |

|                     |                     |   |
|---------------------|---------------------|---|
| <i>circSLC39A10</i> | miR-578             | 2 |
| <i>circSLC39A10</i> | miR-581             | 3 |
| <i>circSLC39A10</i> | miR-585-3p          | 1 |
| <i>circSLC39A10</i> | miR-601             | 2 |
| <i>circSLC39A10</i> | miR-605-5p          | 2 |
| <i>circSLC39A10</i> | miR-6073            | 1 |
| <i>circSLC39A10</i> | miR-6074            | 1 |
| <i>circSLC39A10</i> | miR-6085/6813-5p    | 2 |
| <i>circSLC39A10</i> | miR-6165            | 2 |
| <i>circSLC39A10</i> | miR-618             | 1 |
| <i>circSLC39A10</i> | miR-624-3p          | 1 |
| <i>circSLC39A10</i> | miR-6499-3p         | 2 |
| <i>circSLC39A10</i> | miR-6509-3p         | 2 |
| <i>circSLC39A10</i> | miR-651-3p          | 4 |
| <i>circSLC39A10</i> | miR-651-5p          | 2 |
| <i>circSLC39A10</i> | miR-6510-5p         | 2 |
| <i>circSLC39A10</i> | miR-6513-5p         | 1 |
| <i>circSLC39A10</i> | miR-6514-5p         | 2 |
| <i>circSLC39A10</i> | miR-6515-3p         | 2 |
| <i>circSLC39A10</i> | miR-656-3p          | 3 |
| <i>circSLC39A10</i> | miR-659-3p          | 1 |
| <i>circSLC39A10</i> | miR-660-3p          | 2 |
| <i>circSLC39A10</i> | miR-6720-5p         | 2 |
| <i>circSLC39A10</i> | miR-6721-5p         | 1 |
| <i>circSLC39A10</i> | miR-6723-5p         | 1 |
| <i>circSLC39A10</i> | miR-6729-3p         | 2 |
| <i>circSLC39A10</i> | miR-6731-3p         | 2 |
| <i>circSLC39A10</i> | miR-6733-3p         | 1 |
| <i>circSLC39A10</i> | miR-6748-3p         | 1 |
| <i>circSLC39A10</i> | miR-6757-5p         | 1 |
| <i>circSLC39A10</i> | miR-6758-3p         | 1 |
| <i>circSLC39A10</i> | miR-6760-3p         | 2 |
| <i>circSLC39A10</i> | miR-6761-5p         | 1 |
| <i>circSLC39A10</i> | miR-6762-5p/6845-5p | 2 |
| <i>circSLC39A10</i> | miR-6771-3p         | 1 |
| <i>circSLC39A10</i> | miR-6777-3p         | 1 |
| <i>circSLC39A10</i> | miR-6778-3p         | 1 |
| <i>circSLC39A10</i> | miR-6783-5p         | 2 |

|                     |                     |   |
|---------------------|---------------------|---|
| <i>circSLC39A10</i> | miR-6787-3p         | 2 |
| <i>circSLC39A10</i> | miR-6791-3p/6829-3p | 1 |
| <i>circSLC39A10</i> | miR-6792-5p         | 1 |
| <i>circSLC39A10</i> | miR-6796-3p         | 1 |
| <i>circSLC39A10</i> | miR-6798-5p         | 2 |
| <i>circSLC39A10</i> | miR-6809-5p         | 1 |
| <i>circSLC39A10</i> | miR-6826-5p         | 1 |
| <i>circSLC39A10</i> | miR-6830-5p         | 3 |
| <i>circSLC39A10</i> | miR-6834-3p         | 3 |
| <i>circSLC39A10</i> | miR-6838-3p         | 1 |
| <i>circSLC39A10</i> | miR-6844            | 1 |
| <i>circSLC39A10</i> | miR-6849-3p         | 1 |
| <i>circSLC39A10</i> | miR-6858-3p         | 1 |
| <i>circSLC39A10</i> | miR-6872-3p         | 1 |
| <i>circSLC39A10</i> | miR-6878-3p         | 2 |
| <i>circSLC39A10</i> | miR-6882-5p         | 1 |
| <i>circSLC39A10</i> | miR-6884-3p         | 5 |
| <i>circSLC39A10</i> | miR-6890-5p         | 1 |
| <i>circSLC39A10</i> | miR-7-3p            | 2 |
| <i>circSLC39A10</i> | miR-7108-5p         | 1 |
| <i>circSLC39A10</i> | miR-7112-3p         | 1 |
| <i>circSLC39A10</i> | miR-7150            | 2 |
| <i>circSLC39A10</i> | miR-7151-5p         | 2 |
| <i>circSLC39A10</i> | miR-7156-3p         | 2 |
| <i>circSLC39A10</i> | miR-7515            | 1 |
| <i>circSLC39A10</i> | miR-758-3p          | 1 |
| <i>circSLC39A10</i> | miR-759             | 1 |
| <i>circSLC39A10</i> | miR-7641            | 1 |
| <i>circSLC39A10</i> | miR-766-3p          | 1 |
| <i>circSLC39A10</i> | miR-7848-3p         | 1 |
| <i>circSLC39A10</i> | miR-7975            | 1 |
| <i>circSLC39A10</i> | miR-8055            | 1 |
| <i>circSLC39A10</i> | miR-8060            | 2 |
| <i>circSLC39A10</i> | miR-8062            | 3 |
| <i>circSLC39A10</i> | miR-8070            | 3 |
| <i>circSLC39A10</i> | miR-8074            | 1 |
| <i>circSLC39A10</i> | miR-8075            | 1 |
| <i>circSLC39A10</i> | miR-8076            | 2 |

|                     |                                     |   |
|---------------------|-------------------------------------|---|
| <i>circSLC39A10</i> | miR-8081                            | 1 |
| <i>circSLC39A10</i> | miR-887-5p                          | 1 |
| <i>circSLC39A10</i> | miR-888-3p                          | 2 |
| <i>circSLC39A10</i> | miR-891a-3p                         | 1 |
| <i>circSLC39A10</i> | miR-892a                            | 3 |
| <i>circSLC39A10</i> | miR-9-5p                            | 1 |
| <i>circSLC39A10</i> | miR-936                             | 1 |
| <i>circSLC39A10</i> | miR-943                             | 2 |
| <i>circSLC39A10</i> | miR-99-3p                           | 1 |
| <i>circSLC39A10</i> | miR-101-3p.2                        | 1 |
| <i>circSLC39A10</i> | miR-1184                            | 1 |
| <i>circSLC39A10</i> | miR-1205                            | 1 |
| <i>circSLC39A10</i> | miR-1207-3p                         | 1 |
| <i>circSLC39A10</i> | miR-138-1-3p                        | 1 |
| <i>circSLC39A10</i> | miR-17-3p                           | 1 |
| <i>circSLC39A10</i> | miR-17-5p/20-5p/93-5p/106-5p/519-3p | 1 |
| <i>circSLC39A10</i> | miR-187-5p                          | 1 |
| <i>circSLC39A10</i> | miR-217                             | 2 |
| <i>circSLC39A10</i> | miR-221-3p/222-3p                   | 1 |
| <i>circSLC39A10</i> | miR-2276-3p                         | 2 |
| <i>circSLC39A10</i> | miR-24-5p                           | 2 |
| <i>circSLC39A10</i> | miR-2467-3p                         | 1 |
| <i>circSLC39A10</i> | miR-302b-5p/302d-5p                 | 1 |
| <i>circSLC39A10</i> | miR-3125/3916/6859-5p               | 2 |
| <i>circSLC39A10</i> | miR-3149                            | 1 |
| <i>circSLC39A10</i> | miR-3150b-3p                        | 1 |
| <i>circSLC39A10</i> | miR-3158-5p                         | 1 |
| <i>circSLC39A10</i> | miR-323b-5p/410-5p/494-5p           | 1 |
| <i>circSLC39A10</i> | miR-329-5p                          | 1 |
| <i>circSLC39A10</i> | miR-3613-5p                         | 1 |
| <i>circSLC39A10</i> | miR-3658                            | 1 |
| <i>circSLC39A10</i> | miR-3689d/6851-5p                   | 1 |
| <i>circSLC39A10</i> | miR-370-3p                          | 1 |
| <i>circSLC39A10</i> | miR-376c-3p                         | 1 |
| <i>circSLC39A10</i> | miR-377-5p/6086                     | 1 |
| <i>circSLC39A10</i> | miR-3919                            | 1 |
| <i>circSLC39A10</i> | miR-3928-3p                         | 1 |
| <i>circSLC39A10</i> | miR-3976                            | 1 |

|                     |                               |   |
|---------------------|-------------------------------|---|
| <i>circSLC39A10</i> | miR-4511                      | 1 |
| <i>circSLC39A10</i> | miR-4642                      | 1 |
| <i>circSLC39A10</i> | miR-4709-5p                   | 1 |
| <i>circSLC39A10</i> | miR-4756-3p                   | 1 |
| <i>circSLC39A10</i> | miR-4763-5p                   | 2 |
| <i>circSLC39A10</i> | miR-4772-3p                   | 2 |
| <i>circSLC39A10</i> | miR-5002-3p                   | 1 |
| <i>circSLC39A10</i> | miR-5008-3p/6737-3p/7157-3p   | 1 |
| <i>circSLC39A10</i> | miR-509-3-5p/509-5p/4418      | 2 |
| <i>circSLC39A10</i> | miR-5092                      | 1 |
| <i>circSLC39A10</i> | miR-548ah-5p/3609             | 1 |
| <i>circSLC39A10</i> | miR-548b-3p                   | 1 |
| <i>circSLC39A10</i> | miR-548v                      | 1 |
| <i>circSLC39A10</i> | miR-550a-3-5p/550a-5p/1271-3p | 1 |
| <i>circSLC39A10</i> | miR-550b-2-5p                 | 1 |
| <i>circSLC39A10</i> | miR-556-5p                    | 1 |
| <i>circSLC39A10</i> | miR-568                       | 1 |
| <i>circSLC39A10</i> | miR-5689                      | 1 |
| <i>circSLC39A10</i> | miR-582-5p                    | 1 |
| <i>circSLC39A10</i> | miR-595                       | 1 |
| <i>circSLC39A10</i> | miR-648                       | 1 |
| <i>circSLC39A10</i> | miR-6514-3p                   | 2 |
| <i>circSLC39A10</i> | miR-655-5p                    | 1 |
| <i>circSLC39A10</i> | miR-6758-5p/6856-5p           | 1 |
| <i>circSLC39A10</i> | miR-6866-5p                   | 1 |
| <i>circSLC39A10</i> | miR-6889-3p                   | 1 |
| <i>circSLC39A10</i> | miR-6894-3p                   | 2 |
| <i>circSLC39A10</i> | miR-7849-3p                   | 1 |
| <i>circSLC39A10</i> | miR-7856-5p                   | 1 |
| <i>circSLC39A10</i> | miR-877-5p                    | 1 |
| <i>circSLC45A4</i>  | miR-1-3p/206                  | 1 |
| <i>circSLC45A4</i>  | miR-101-3p.1                  | 1 |
| <i>circSLC45A4</i>  | miR-101-5p                    | 2 |
| <i>circSLC45A4</i>  | miR-1179                      | 1 |
| <i>circSLC45A4</i>  | miR-1203                      | 2 |
| <i>circSLC45A4</i>  | miR-1207-5p/4763-3p           | 1 |
| <i>circSLC45A4</i>  | miR-122-3p                    | 1 |
| <i>circSLC45A4</i>  | miR-1224-3p                   | 2 |

|                    |                          |   |
|--------------------|--------------------------|---|
| <i>circSLC45A4</i> | miR-1228-3p              | 1 |
| <i>circSLC45A4</i> | miR-1236-3p              | 1 |
| <i>circSLC45A4</i> | miR-124-5p               | 1 |
| <i>circSLC45A4</i> | miR-1246                 | 1 |
| <i>circSLC45A4</i> | miR-1253                 | 2 |
| <i>circSLC45A4</i> | miR-126-5p               | 1 |
| <i>circSLC45A4</i> | miR-1260a/1260b          | 2 |
| <i>circSLC45A4</i> | miR-1262/4701-3p/6736-5p | 1 |
| <i>circSLC45A4</i> | miR-1266-3p              | 2 |
| <i>circSLC45A4</i> | miR-1272                 | 1 |
| <i>circSLC45A4</i> | miR-1276                 | 2 |
| <i>circSLC45A4</i> | miR-1277-5p              | 1 |
| <i>circSLC45A4</i> | miR-128-3p               | 1 |
| <i>circSLC45A4</i> | miR-129-5p               | 1 |
| <i>circSLC45A4</i> | miR-1290                 | 1 |
| <i>circSLC45A4</i> | miR-1306-5p              | 4 |
| <i>circSLC45A4</i> | miR-1322                 | 1 |
| <i>circSLC45A4</i> | miR-134-3p               | 1 |
| <i>circSLC45A4</i> | miR-135-5p               | 2 |
| <i>circSLC45A4</i> | miR-144-3p               | 1 |
| <i>circSLC45A4</i> | miR-145-5p               | 2 |
| <i>circSLC45A4</i> | miR-146-5p               | 2 |
| <i>circSLC45A4</i> | miR-148a-5p              | 2 |
| <i>circSLC45A4</i> | miR-148b-5p/6874-3p      | 1 |
| <i>circSLC45A4</i> | miR-151-5p               | 1 |
| <i>circSLC45A4</i> | miR-1537-3p              | 1 |
| <i>circSLC45A4</i> | miR-181a-2-3p            | 2 |
| <i>circSLC45A4</i> | miR-182-5p               | 1 |
| <i>circSLC45A4</i> | miR-183-5p.1             | 1 |
| <i>circSLC45A4</i> | miR-188-3p               | 2 |
| <i>circSLC45A4</i> | miR-18a-3p               | 1 |
| <i>circSLC45A4</i> | miR-19-3p                | 1 |
| <i>circSLC45A4</i> | miR-1909-3p/6722-3p      | 1 |
| <i>circSLC45A4</i> | miR-190a-3p              | 2 |
| <i>circSLC45A4</i> | miR-1914-5p              | 1 |
| <i>circSLC45A4</i> | miR-1973                 | 2 |
| <i>circSLC45A4</i> | miR-200c-5p/550a-3p      | 1 |
| <i>circSLC45A4</i> | miR-20a-3p               | 1 |

|                    |                           |   |
|--------------------|---------------------------|---|
| <i>circSLC45A4</i> | miR-20b-3p                | 1 |
| <i>circSLC45A4</i> | miR-210-5p                | 2 |
| <i>circSLC45A4</i> | miR-2110                  | 2 |
| <i>circSLC45A4</i> | miR-214-3p/3619-5p        | 1 |
| <i>circSLC45A4</i> | miR-214-5p                | 1 |
| <i>circSLC45A4</i> | miR-222-5p                | 1 |
| <i>circSLC45A4</i> | miR-2355-5p               | 1 |
| <i>circSLC45A4</i> | miR-2467-3p               | 2 |
| <i>circSLC45A4</i> | miR-27-3p                 | 1 |
| <i>circSLC45A4</i> | miR-29-3p                 | 1 |
| <i>circSLC45A4</i> | miR-298                   | 6 |
| <i>circSLC45A4</i> | miR-29c-5p                | 1 |
| <i>circSLC45A4</i> | miR-30-5p                 | 1 |
| <i>circSLC45A4</i> | miR-3065-3p               | 1 |
| <i>circSLC45A4</i> | miR-3120-3p               | 1 |
| <i>circSLC45A4</i> | miR-3123                  | 1 |
| <i>circSLC45A4</i> | miR-3125/3916/6859-5p     | 1 |
| <i>circSLC45A4</i> | miR-3137                  | 1 |
| <i>circSLC45A4</i> | miR-3149                  | 2 |
| <i>circSLC45A4</i> | miR-3150a-3p              | 2 |
| <i>circSLC45A4</i> | miR-3152-3p               | 1 |
| <i>circSLC45A4</i> | miR-3156-3p               | 2 |
| <i>circSLC45A4</i> | miR-3168                  | 1 |
| <i>circSLC45A4</i> | miR-3177-3p               | 1 |
| <i>circSLC45A4</i> | miR-3180-3p               | 1 |
| <i>circSLC45A4</i> | miR-3183/4723-3p/6769b-3p | 2 |
| <i>circSLC45A4</i> | miR-3191-5p               | 1 |
| <i>circSLC45A4</i> | miR-3194-3p               | 1 |
| <i>circSLC45A4</i> | miR-3197                  | 2 |
| <i>circSLC45A4</i> | miR-323a-5p               | 1 |
| <i>circSLC45A4</i> | miR-324-3p/1913           | 1 |
| <i>circSLC45A4</i> | miR-326                   | 1 |
| <i>circSLC45A4</i> | miR-330-3p.2              | 1 |
| <i>circSLC45A4</i> | miR-331-3p                | 2 |
| <i>circSLC45A4</i> | miR-335-5p                | 2 |
| <i>circSLC45A4</i> | miR-338-3p                | 1 |
| <i>circSLC45A4</i> | miR-34a-3p                | 2 |
| <i>circSLC45A4</i> | miR-34b-3p                | 1 |



|                    |                       |   |
|--------------------|-----------------------|---|
| <i>circSLC45A4</i> | miR-34c-3p            | 1 |
| <i>circSLC45A4</i> | miR-3612              | 2 |
| <i>circSLC45A4</i> | miR-3613-3p           | 1 |
| <i>circSLC45A4</i> | miR-3614-5p           | 1 |
| <i>circSLC45A4</i> | miR-3617-3p           | 2 |
| <i>circSLC45A4</i> | miR-3619-3p           | 2 |
| <i>circSLC45A4</i> | miR-3622a-3p/3622b-3p | 2 |
| <i>circSLC45A4</i> | miR-365-3p            | 2 |
| <i>circSLC45A4</i> | miR-3651              | 1 |
| <i>circSLC45A4</i> | miR-3662              | 2 |
| <i>circSLC45A4</i> | miR-3663-5p           | 1 |
| <i>circSLC45A4</i> | miR-3667-3p           | 2 |
| <i>circSLC45A4</i> | miR-3675-5p           | 2 |
| <i>circSLC45A4</i> | miR-3684              | 1 |
| <i>circSLC45A4</i> | miR-3686              | 1 |
| <i>circSLC45A4</i> | miR-3687/4442         | 2 |
| <i>circSLC45A4</i> | miR-3688-3p           | 1 |
| <i>circSLC45A4</i> | miR-374a-3p           | 1 |
| <i>circSLC45A4</i> | miR-377-3p            | 1 |
| <i>circSLC45A4</i> | miR-381-5p            | 2 |
| <i>circSLC45A4</i> | miR-382-3p            | 1 |
| <i>circSLC45A4</i> | miR-382-5p            | 1 |
| <i>circSLC45A4</i> | miR-383-3p            | 1 |
| <i>circSLC45A4</i> | miR-3914              | 1 |
| <i>circSLC45A4</i> | miR-3925-5p           | 1 |
| <i>circSLC45A4</i> | miR-3928-3p           | 2 |
| <i>circSLC45A4</i> | miR-3978              | 1 |
| <i>circSLC45A4</i> | miR-423-5p            | 2 |
| <i>circSLC45A4</i> | miR-4252              | 1 |
| <i>circSLC45A4</i> | miR-4255              | 1 |
| <i>circSLC45A4</i> | miR-4257              | 2 |
| <i>circSLC45A4</i> | miR-4261              | 1 |
| <i>circSLC45A4</i> | miR-4265/4296/4322    | 1 |
| <i>circSLC45A4</i> | miR-4270/4441/6754-5p | 1 |
| <i>circSLC45A4</i> | miR-4275              | 1 |
| <i>circSLC45A4</i> | miR-4291              | 1 |
| <i>circSLC45A4</i> | miR-4307              | 2 |
| <i>circSLC45A4</i> | miR-4311              | 2 |

|                    |                     |   |
|--------------------|---------------------|---|
| <i>circSLC45A4</i> | miR-4422            | 1 |
| <i>circSLC45A4</i> | miR-4424            | 2 |
| <i>circSLC45A4</i> | miR-4427            | 1 |
| <i>circSLC45A4</i> | miR-4450            | 2 |
| <i>circSLC45A4</i> | miR-4477a           | 1 |
| <i>circSLC45A4</i> | miR-4490            | 1 |
| <i>circSLC45A4</i> | miR-4495            | 1 |
| <i>circSLC45A4</i> | miR-4508            | 1 |
| <i>circSLC45A4</i> | miR-4528            | 1 |
| <i>circSLC45A4</i> | miR-4530            | 1 |
| <i>circSLC45A4</i> | miR-4536-5p         | 1 |
| <i>circSLC45A4</i> | miR-4652-3p         | 2 |
| <i>circSLC45A4</i> | miR-4653-3p         | 1 |
| <i>circSLC45A4</i> | miR-4662-5p         | 1 |
| <i>circSLC45A4</i> | miR-4666b           | 1 |
| <i>circSLC45A4</i> | miR-4668-3p         | 3 |
| <i>circSLC45A4</i> | miR-4670-3p         | 1 |
| <i>circSLC45A4</i> | miR-4680-3p         | 1 |
| <i>circSLC45A4</i> | miR-4684-5p         | 1 |
| <i>circSLC45A4</i> | miR-4694-3p         | 2 |
| <i>circSLC45A4</i> | miR-4696            | 1 |
| <i>circSLC45A4</i> | miR-4704-3p         | 2 |
| <i>circSLC45A4</i> | miR-4722-3p/6727-3p | 3 |
| <i>circSLC45A4</i> | miR-4724-5p         | 1 |
| <i>circSLC45A4</i> | miR-4735-5p         | 1 |
| <i>circSLC45A4</i> | miR-4736            | 1 |
| <i>circSLC45A4</i> | miR-4737            | 2 |
| <i>circSLC45A4</i> | miR-4738-3p         | 1 |
| <i>circSLC45A4</i> | miR-4738-5p         | 2 |
| <i>circSLC45A4</i> | miR-4739            | 1 |
| <i>circSLC45A4</i> | miR-4740-3p         | 1 |
| <i>circSLC45A4</i> | miR-4743-3p         | 2 |
| <i>circSLC45A4</i> | miR-4746-3p         | 1 |
| <i>circSLC45A4</i> | miR-4749-3p         | 2 |
| <i>circSLC45A4</i> | miR-4760-3p         | 1 |
| <i>circSLC45A4</i> | miR-4764-3p         | 1 |
| <i>circSLC45A4</i> | miR-4766-3p         | 1 |
| <i>circSLC45A4</i> | miR-4774-5p         | 1 |

|                    |                   |   |
|--------------------|-------------------|---|
| <i>circSLC45A4</i> | miR-4775          | 1 |
| <i>circSLC45A4</i> | miR-4786-5p       | 2 |
| <i>circSLC45A4</i> | miR-4787-3p       | 1 |
| <i>circSLC45A4</i> | miR-4790-3p       | 1 |
| <i>circSLC45A4</i> | miR-4800-3p       | 2 |
| <i>circSLC45A4</i> | miR-488-3p        | 1 |
| <i>circSLC45A4</i> | miR-490-5p        | 1 |
| <i>circSLC45A4</i> | miR-495-5p        | 1 |
| <i>circSLC45A4</i> | miR-496.2         | 1 |
| <i>circSLC45A4</i> | miR-498           | 2 |
| <i>circSLC45A4</i> | miR-5000-5p       | 2 |
| <i>circSLC45A4</i> | miR-5008-5p       | 2 |
| <i>circSLC45A4</i> | miR-501-3p/502-3p | 1 |
| <i>circSLC45A4</i> | miR-5011-3p       | 1 |
| <i>circSLC45A4</i> | miR-5011-5p       | 3 |
| <i>circSLC45A4</i> | miR-5090/6775-5p  | 1 |
| <i>circSLC45A4</i> | miR-513a-5p       | 1 |
| <i>circSLC45A4</i> | miR-5187-3p       | 1 |
| <i>circSLC45A4</i> | miR-518a-5p/527   | 1 |
| <i>circSLC45A4</i> | miR-518c-5p       | 1 |
| <i>circSLC45A4</i> | miR-5194          | 2 |
| <i>circSLC45A4</i> | miR-5197-3p       | 1 |
| <i>circSLC45A4</i> | miR-5197-5p       | 3 |
| <i>circSLC45A4</i> | miR-520f-5p       | 1 |
| <i>circSLC45A4</i> | miR-522-3p        | 2 |
| <i>circSLC45A4</i> | miR-539-3p        | 1 |
| <i>circSLC45A4</i> | miR-545-5p        | 2 |
| <i>circSLC45A4</i> | miR-548av-3p      | 1 |
| <i>circSLC45A4</i> | miR-548aw         | 1 |
| <i>circSLC45A4</i> | miR-548c-3p       | 2 |
| <i>circSLC45A4</i> | miR-548g-3p       | 1 |
| <i>circSLC45A4</i> | miR-551b-5p       | 1 |
| <i>circSLC45A4</i> | miR-552-5p        | 1 |
| <i>circSLC45A4</i> | miR-5580-3p       | 1 |
| <i>circSLC45A4</i> | miR-5581-3p       | 1 |
| <i>circSLC45A4</i> | miR-5584-3p       | 1 |
| <i>circSLC45A4</i> | miR-5586-5p       | 2 |
| <i>circSLC45A4</i> | miR-5587-5p       | 1 |

|                    |                  |   |
|--------------------|------------------|---|
| <i>circSLC45A4</i> | miR-5681b        | 1 |
| <i>circSLC45A4</i> | miR-5683         | 1 |
| <i>circSLC45A4</i> | miR-5684         | 1 |
| <i>circSLC45A4</i> | miR-577          | 1 |
| <i>circSLC45A4</i> | miR-580-3p       | 1 |
| <i>circSLC45A4</i> | miR-580-5p       | 1 |
| <i>circSLC45A4</i> | miR-581          | 1 |
| <i>circSLC45A4</i> | miR-582-3p       | 2 |
| <i>circSLC45A4</i> | miR-583          | 2 |
| <i>circSLC45A4</i> | miR-589-5p       | 2 |
| <i>circSLC45A4</i> | miR-591          | 2 |
| <i>circSLC45A4</i> | miR-595          | 1 |
| <i>circSLC45A4</i> | miR-598-5p       | 1 |
| <i>circSLC45A4</i> | miR-605-5p       | 1 |
| <i>circSLC45A4</i> | miR-6068         | 2 |
| <i>circSLC45A4</i> | miR-6078         | 1 |
| <i>circSLC45A4</i> | miR-6083         | 1 |
| <i>circSLC45A4</i> | miR-6087         | 2 |
| <i>circSLC45A4</i> | miR-6089         | 2 |
| <i>circSLC45A4</i> | miR-611/3131     | 1 |
| <i>circSLC45A4</i> | miR-6132/6836-5p | 1 |
| <i>circSLC45A4</i> | miR-615-5p       | 2 |
| <i>circSLC45A4</i> | miR-618          | 1 |
| <i>circSLC45A4</i> | miR-634          | 3 |
| <i>circSLC45A4</i> | miR-6500-3p      | 1 |
| <i>circSLC45A4</i> | miR-6502-3p      | 2 |
| <i>circSLC45A4</i> | miR-6504-3p      | 1 |
| <i>circSLC45A4</i> | miR-6515-3p      | 1 |
| <i>circSLC45A4</i> | miR-653-5p       | 1 |
| <i>circSLC45A4</i> | miR-654-3p       | 1 |
| <i>circSLC45A4</i> | miR-668-3p       | 2 |
| <i>circSLC45A4</i> | miR-668-5p       | 1 |
| <i>circSLC45A4</i> | miR-6720-3p      | 1 |
| <i>circSLC45A4</i> | miR-6722-5p      | 2 |
| <i>circSLC45A4</i> | miR-6734-3p      | 2 |
| <i>circSLC45A4</i> | miR-6740-5p      | 1 |
| <i>circSLC45A4</i> | miR-6741-5p      | 1 |
| <i>circSLC45A4</i> | miR-6747-3p      | 3 |

|                    |                     |   |
|--------------------|---------------------|---|
| <i>circSLC45A4</i> | miR-6748-5p         | 1 |
| <i>circSLC45A4</i> | miR-6752-3p         | 2 |
| <i>circSLC45A4</i> | miR-6759-5p         | 1 |
| <i>circSLC45A4</i> | miR-676-5p          | 1 |
| <i>circSLC45A4</i> | miR-6760-5p         | 1 |
| <i>circSLC45A4</i> | miR-6764-3p/6824-3p | 1 |
| <i>circSLC45A4</i> | miR-6765-3p         | 2 |
| <i>circSLC45A4</i> | miR-6767-5p         | 6 |
| <i>circSLC45A4</i> | miR-6768-5p         | 1 |
| <i>circSLC45A4</i> | miR-6770-5p         | 2 |
| <i>circSLC45A4</i> | miR-6782-5p         | 2 |
| <i>circSLC45A4</i> | miR-6793-5p         | 1 |
| <i>circSLC45A4</i> | miR-6794-3p         | 2 |
| <i>circSLC45A4</i> | miR-6796-5p         | 1 |
| <i>circSLC45A4</i> | miR-6800-3p         | 3 |
| <i>circSLC45A4</i> | miR-6801-3p/6810-3p | 2 |
| <i>circSLC45A4</i> | miR-6804-3p         | 1 |
| <i>circSLC45A4</i> | miR-6810-5p         | 2 |
| <i>circSLC45A4</i> | miR-6811-3p         | 1 |
| <i>circSLC45A4</i> | miR-6812-3p         | 1 |
| <i>circSLC45A4</i> | miR-6817-3p         | 2 |
| <i>circSLC45A4</i> | miR-6818-3p         | 1 |
| <i>circSLC45A4</i> | miR-6847-5p         | 2 |
| <i>circSLC45A4</i> | miR-6857-5p         | 2 |
| <i>circSLC45A4</i> | miR-6863            | 1 |
| <i>circSLC45A4</i> | miR-6871-3p         | 1 |
| <i>circSLC45A4</i> | miR-6872-3p         | 1 |
| <i>circSLC45A4</i> | miR-6884-3p         | 2 |
| <i>circSLC45A4</i> | miR-6886-5p         | 4 |
| <i>circSLC45A4</i> | miR-6890-5p         | 2 |
| <i>circSLC45A4</i> | miR-711             | 2 |
| <i>circSLC45A4</i> | miR-7110-3p         | 2 |
| <i>circSLC45A4</i> | miR-7114-5p         | 1 |
| <i>circSLC45A4</i> | miR-7150            | 1 |
| <i>circSLC45A4</i> | miR-7152-3p         | 1 |
| <i>circSLC45A4</i> | miR-744-3p          | 1 |
| <i>circSLC45A4</i> | miR-758-3p          | 2 |
| <i>circSLC45A4</i> | miR-769-5p          | 2 |

|                    |                   |   |
|--------------------|-------------------|---|
| <i>circSLC45A4</i> | miR-7704          | 2 |
| <i>circSLC45A4</i> | miR-7846-3p       | 2 |
| <i>circSLC45A4</i> | miR-802           | 2 |
| <i>circSLC45A4</i> | miR-8057          | 2 |
| <i>circSLC45A4</i> | miR-8060          | 1 |
| <i>circSLC45A4</i> | miR-8068          | 2 |
| <i>circSLC45A4</i> | miR-876-3p        | 1 |
| <i>circSLC45A4</i> | miR-876-5p        | 1 |
| <i>circSLC45A4</i> | miR-889-5p        | 2 |
| <i>circSLC45A4</i> | miR-922           | 1 |
| <i>circSLC45A4</i> | miR-941           | 2 |
| <i>circSLC45A4</i> | miR-944           | 1 |
| <i>circSLC45A4</i> | miR-96-5p/1271-5p | 1 |
| <i>circSLC8A1</i>  | miR-1-3p/206      | 1 |
| <i>circSLC8A1</i>  | miR-106b-3p       | 1 |
| <i>circSLC8A1</i>  | miR-1181          | 1 |
| <i>circSLC8A1</i>  | miR-1184          | 1 |
| <i>circSLC8A1</i>  | miR-1205          | 1 |
| <i>circSLC8A1</i>  | miR-1206          | 2 |
| <i>circSLC8A1</i>  | miR-1207-3p       | 1 |
| <i>circSLC8A1</i>  | miR-1208          | 1 |
| <i>circSLC8A1</i>  | miR-1227-3p       | 1 |
| <i>circSLC8A1</i>  | miR-1227-5p       | 1 |
| <i>circSLC8A1</i>  | miR-1228-3p       | 1 |
| <i>circSLC8A1</i>  | miR-1228-5p       | 1 |
| <i>circSLC8A1</i>  | miR-1243          | 1 |
| <i>circSLC8A1</i>  | miR-1245a/8079    | 1 |
| <i>circSLC8A1</i>  | miR-1253          | 2 |
| <i>circSLC8A1</i>  | miR-1260a/1260b   | 1 |
| <i>circSLC8A1</i>  | miR-1266-3p       | 4 |
| <i>circSLC8A1</i>  | miR-1268a/1268b   | 1 |
| <i>circSLC8A1</i>  | miR-127-5p        | 1 |
| <i>circSLC8A1</i>  | miR-1270          | 4 |
| <i>circSLC8A1</i>  | miR-1272          | 3 |
| <i>circSLC8A1</i>  | miR-1273g-3p      | 1 |
| <i>circSLC8A1</i>  | miR-1273g-5p      | 1 |
| <i>circSLC8A1</i>  | miR-1273h-3p      | 1 |
| <i>circSLC8A1</i>  | miR-1276          | 3 |

|                   |                                      |   |
|-------------------|--------------------------------------|---|
| <i>circSLC8A1</i> | miR-1278                             | 1 |
| <i>circSLC8A1</i> | miR-1287-5p                          | 1 |
| <i>circSLC8A1</i> | miR-1291/6775-3p                     | 1 |
| <i>circSLC8A1</i> | miR-1299                             | 1 |
| <i>circSLC8A1</i> | miR-1302/4298                        | 1 |
| <i>circSLC8A1</i> | miR-132-3p/212-3p                    | 1 |
| <i>circSLC8A1</i> | miR-1322                             | 3 |
| <i>circSLC8A1</i> | miR-134-3p                           | 1 |
| <i>circSLC8A1</i> | miR-134-5p                           | 1 |
| <i>circSLC8A1</i> | miR-1343-3p                          | 1 |
| <i>circSLC8A1</i> | miR-135-5p                           | 1 |
| <i>circSLC8A1</i> | miR-136-5p                           | 1 |
| <i>circSLC8A1</i> | miR-140-5p                           | 1 |
| <i>circSLC8A1</i> | miR-143-5p                           | 2 |
| <i>circSLC8A1</i> | miR-146-5p                           | 2 |
| <i>circSLC8A1</i> | miR-146a-3p                          | 1 |
| <i>circSLC8A1</i> | miR-1470                             | 1 |
| <i>circSLC8A1</i> | miR-148-3p/152-3p                    | 2 |
| <i>circSLC8A1</i> | miR-149-5p                           | 1 |
| <i>circSLC8A1</i> | miR-15-5p/16-5p/195-5p/424-5p/497-5p | 1 |
| <i>circSLC8A1</i> | miR-17-3p                            | 1 |
| <i>circSLC8A1</i> | miR-181-3p/4420                      | 1 |
| <i>circSLC8A1</i> | miR-185-5p                           | 4 |
| <i>circSLC8A1</i> | miR-188-3p                           | 1 |
| <i>circSLC8A1</i> | miR-18a-3p                           | 1 |
| <i>circSLC8A1</i> | miR-192-3p                           | 1 |
| <i>circSLC8A1</i> | miR-196b-3p                          | 1 |
| <i>circSLC8A1</i> | miR-1976                             | 1 |
| <i>circSLC8A1</i> | miR-200-3p/429                       | 1 |
| <i>circSLC8A1</i> | miR-203a-3p.1                        | 1 |
| <i>circSLC8A1</i> | miR-203a-5p                          | 1 |
| <i>circSLC8A1</i> | miR-204-3p/4646-5p                   | 1 |
| <i>circSLC8A1</i> | miR-208-5p                           | 1 |
| <i>circSLC8A1</i> | miR-2110                             | 1 |
| <i>circSLC8A1</i> | miR-2115-5p                          | 1 |
| <i>circSLC8A1</i> | miR-215-3p                           | 1 |
| <i>circSLC8A1</i> | miR-217                              | 1 |
| <i>circSLC8A1</i> | miR-22-3p                            | 1 |

|                   |                                              |   |
|-------------------|----------------------------------------------|---|
| <i>circSLC8A1</i> | miR-221-5p/8073                              | 2 |
| <i>circSLC8A1</i> | miR-223-3p                                   | 1 |
| <i>circSLC8A1</i> | miR-2277-3p                                  | 1 |
| <i>circSLC8A1</i> | miR-2278                                     | 1 |
| <i>circSLC8A1</i> | miR-25-3p/32-5p/92-3p/363-3p/367-3p          | 2 |
| <i>circSLC8A1</i> | miR-298                                      | 1 |
| <i>circSLC8A1</i> | miR-299-3p                                   | 1 |
| <i>circSLC8A1</i> | miR-302c-3p.2/520-3p                         | 1 |
| <i>circSLC8A1</i> | miR-30b-3p/1273h-5p/3689-3p/6779-5p/6780a-5p | 1 |
| <i>circSLC8A1</i> | miR-30c-3p/6788-5p                           | 1 |
| <i>circSLC8A1</i> | miR-3122/3913-5p                             | 1 |
| <i>circSLC8A1</i> | miR-3123                                     | 3 |
| <i>circSLC8A1</i> | miR-3125/3916/6859-5p                        | 2 |
| <i>circSLC8A1</i> | miR-3130-3p                                  | 1 |
| <i>circSLC8A1</i> | miR-3135b                                    | 1 |
| <i>circSLC8A1</i> | miR-3136-5p/4439                             | 2 |
| <i>circSLC8A1</i> | miR-3138                                     | 1 |
| <i>circSLC8A1</i> | miR-3140-5p                                  | 1 |
| <i>circSLC8A1</i> | miR-3147                                     | 1 |
| <i>circSLC8A1</i> | miR-3150a-3p                                 | 1 |
| <i>circSLC8A1</i> | miR-3150b-3p                                 | 2 |
| <i>circSLC8A1</i> | miR-3151-5p                                  | 1 |
| <i>circSLC8A1</i> | miR-3152-5p                                  | 1 |
| <i>circSLC8A1</i> | miR-3156-3p                                  | 1 |
| <i>circSLC8A1</i> | miR-3157-3p                                  | 2 |
| <i>circSLC8A1</i> | miR-3158-5p                                  | 1 |
| <i>circSLC8A1</i> | miR-3160-5p                                  | 1 |
| <i>circSLC8A1</i> | miR-3162-3p                                  | 1 |
| <i>circSLC8A1</i> | miR-3164                                     | 1 |
| <i>circSLC8A1</i> | miR-3176/3922-3p                             | 1 |
| <i>circSLC8A1</i> | miR-3178                                     | 1 |
| <i>circSLC8A1</i> | miR-3180-3p                                  | 1 |
| <i>circSLC8A1</i> | miR-3185                                     | 2 |
| <i>circSLC8A1</i> | miR-3189-5p                                  | 1 |
| <i>circSLC8A1</i> | miR-3190-5p                                  | 1 |
| <i>circSLC8A1</i> | miR-3192-5p                                  | 1 |
| <i>circSLC8A1</i> | miR-3197                                     | 1 |
| <i>circSLC8A1</i> | miR-3199/8052                                | 1 |



|                   |                           |   |
|-------------------|---------------------------|---|
| <i>circSLC8A1</i> | miR-3202                  | 2 |
| <i>circSLC8A1</i> | miR-320e                  | 1 |
| <i>circSLC8A1</i> | miR-324-3p/1913           | 1 |
| <i>circSLC8A1</i> | miR-328-3p                | 1 |
| <i>circSLC8A1</i> | miR-338-3p                | 1 |
| <i>circSLC8A1</i> | miR-33b-3p/515-3p/519e-3p | 1 |
| <i>circSLC8A1</i> | miR-345-3p                | 1 |
| <i>circSLC8A1</i> | miR-345-5p                | 1 |
| <i>circSLC8A1</i> | miR-34b-3p                | 1 |
| <i>circSLC8A1</i> | miR-34c-3p                | 1 |
| <i>circSLC8A1</i> | miR-3614-5p               | 1 |
| <i>circSLC8A1</i> | miR-3652/4430             | 1 |
| <i>circSLC8A1</i> | miR-3653-3p               | 1 |
| <i>circSLC8A1</i> | miR-3653-5p               | 1 |
| <i>circSLC8A1</i> | miR-3654                  | 1 |
| <i>circSLC8A1</i> | miR-3658                  | 1 |
| <i>circSLC8A1</i> | miR-365a-5p/365b-5p       | 1 |
| <i>circSLC8A1</i> | miR-3660/4526             | 1 |
| <i>circSLC8A1</i> | miR-3663-3p               | 1 |
| <i>circSLC8A1</i> | miR-3675-5p               | 1 |
| <i>circSLC8A1</i> | miR-3678-3p               | 1 |
| <i>circSLC8A1</i> | miR-3682-3p               | 2 |
| <i>circSLC8A1</i> | miR-3691-3p               | 2 |
| <i>circSLC8A1</i> | miR-371a-3p               | 1 |
| <i>circSLC8A1</i> | miR-371b-3p               | 1 |
| <i>circSLC8A1</i> | miR-378g                  | 1 |
| <i>circSLC8A1</i> | miR-382-3p                | 2 |
| <i>circSLC8A1</i> | miR-382-5p                | 1 |
| <i>circSLC8A1</i> | miR-3925-5p               | 3 |
| <i>circSLC8A1</i> | miR-3928-3p               | 3 |
| <i>circSLC8A1</i> | miR-3928-5p/6806-3p       | 2 |
| <i>circSLC8A1</i> | miR-3974                  | 1 |
| <i>circSLC8A1</i> | miR-4252                  | 1 |
| <i>circSLC8A1</i> | miR-4256                  | 1 |
| <i>circSLC8A1</i> | miR-4259                  | 1 |
| <i>circSLC8A1</i> | miR-4265/4296/4322        | 1 |
| <i>circSLC8A1</i> | miR-4271/4725-3p/6780b-5p | 2 |
| <i>circSLC8A1</i> | miR-4273/7156-5p          | 1 |

|                   |                     |   |
|-------------------|---------------------|---|
| <i>circSLC8A1</i> | miR-4276            | 2 |
| <i>circSLC8A1</i> | miR-4277            | 1 |
| <i>circSLC8A1</i> | miR-4289            | 1 |
| <i>circSLC8A1</i> | miR-4290            | 1 |
| <i>circSLC8A1</i> | miR-4297/5581-5p    | 1 |
| <i>circSLC8A1</i> | miR-4301            | 1 |
| <i>circSLC8A1</i> | miR-4311            | 3 |
| <i>circSLC8A1</i> | miR-4317            | 2 |
| <i>circSLC8A1</i> | miR-4318            | 2 |
| <i>circSLC8A1</i> | miR-432-5p          | 1 |
| <i>circSLC8A1</i> | miR-4325            | 1 |
| <i>circSLC8A1</i> | miR-433-3p          | 1 |
| <i>circSLC8A1</i> | miR-4425            | 1 |
| <i>circSLC8A1</i> | miR-4426/4647/4662b | 1 |
| <i>circSLC8A1</i> | miR-4427            | 1 |
| <i>circSLC8A1</i> | miR-4440            | 1 |
| <i>circSLC8A1</i> | miR-4447/4472       | 1 |
| <i>circSLC8A1</i> | miR-4476/6876-5p    | 3 |
| <i>circSLC8A1</i> | miR-4480            | 1 |
| <i>circSLC8A1</i> | miR-4486            | 1 |
| <i>circSLC8A1</i> | miR-4491/4657       | 1 |
| <i>circSLC8A1</i> | miR-4505/5787       | 1 |
| <i>circSLC8A1</i> | miR-4506            | 1 |
| <i>circSLC8A1</i> | miR-450a-1-3p       | 1 |
| <i>circSLC8A1</i> | miR-4517            | 2 |
| <i>circSLC8A1</i> | miR-4520-3p         | 1 |
| <i>circSLC8A1</i> | miR-4530            | 1 |
| <i>circSLC8A1</i> | miR-4531            | 4 |
| <i>circSLC8A1</i> | miR-4533            | 2 |
| <i>circSLC8A1</i> | miR-455-3p.2        | 2 |
| <i>circSLC8A1</i> | miR-4637            | 1 |
| <i>circSLC8A1</i> | miR-4652-3p         | 1 |
| <i>circSLC8A1</i> | miR-4667-3p         | 1 |
| <i>circSLC8A1</i> | miR-4677-3p         | 1 |
| <i>circSLC8A1</i> | miR-4677-5p         | 1 |
| <i>circSLC8A1</i> | miR-4679            | 1 |
| <i>circSLC8A1</i> | miR-4680-3p         | 1 |
| <i>circSLC8A1</i> | miR-4691-3p         | 1 |

|                   |                     |   |
|-------------------|---------------------|---|
| <i>circSLC8A1</i> | miR-4693-5p         | 2 |
| <i>circSLC8A1</i> | miR-4694-3p         | 2 |
| <i>circSLC8A1</i> | miR-4697-3p         | 1 |
| <i>circSLC8A1</i> | miR-4699-5p         | 2 |
| <i>circSLC8A1</i> | miR-4709-3p         | 1 |
| <i>circSLC8A1</i> | miR-4715-5p         | 1 |
| <i>circSLC8A1</i> | miR-4724-5p         | 1 |
| <i>circSLC8A1</i> | miR-4731-5p         | 1 |
| <i>circSLC8A1</i> | miR-4743-3p         | 1 |
| <i>circSLC8A1</i> | miR-4747-5p/5196-5p | 2 |
| <i>circSLC8A1</i> | miR-4750-3p         | 1 |
| <i>circSLC8A1</i> | miR-4752            | 1 |
| <i>circSLC8A1</i> | miR-4757-3p         | 1 |
| <i>circSLC8A1</i> | miR-4758-3p         | 1 |
| <i>circSLC8A1</i> | miR-4762-3p         | 1 |
| <i>circSLC8A1</i> | miR-4766-5p         | 1 |
| <i>circSLC8A1</i> | miR-4773            | 2 |
| <i>circSLC8A1</i> | miR-4774-3p         | 1 |
| <i>circSLC8A1</i> | miR-4778-5p         | 1 |
| <i>circSLC8A1</i> | miR-4780            | 2 |
| <i>circSLC8A1</i> | miR-4782-5p/5706    | 1 |
| <i>circSLC8A1</i> | miR-4786-5p         | 1 |
| <i>circSLC8A1</i> | miR-4790-3p         | 1 |
| <i>circSLC8A1</i> | miR-4793-3p         | 1 |
| <i>circSLC8A1</i> | miR-4793-5p         | 2 |
| <i>circSLC8A1</i> | miR-4795-5p         | 1 |
| <i>circSLC8A1</i> | miR-4800-5p         | 1 |
| <i>circSLC8A1</i> | miR-488-3p          | 1 |
| <i>circSLC8A1</i> | miR-490-3p          | 2 |
| <i>circSLC8A1</i> | miR-491-5p          | 1 |
| <i>circSLC8A1</i> | miR-493-3p          | 2 |
| <i>circSLC8A1</i> | miR-495-5p          | 1 |
| <i>circSLC8A1</i> | miR-497-3p          | 1 |
| <i>circSLC8A1</i> | miR-499a-3p/499b-3p | 1 |
| <i>circSLC8A1</i> | miR-5000-5p         | 1 |
| <i>circSLC8A1</i> | miR-5002-3p         | 1 |
| <i>circSLC8A1</i> | miR-500a-3p         | 1 |
| <i>circSLC8A1</i> | miR-501-3p/502-3p   | 1 |

|                   |                                      |   |
|-------------------|--------------------------------------|---|
| <i>circSLC8A1</i> | miR-503-5p                           | 1 |
| <i>circSLC8A1</i> | miR-504-3p                           | 1 |
| <i>circSLC8A1</i> | miR-505-5p                           | 2 |
| <i>circSLC8A1</i> | miR-509-3-5p/509-5p/4418             | 1 |
| <i>circSLC8A1</i> | miR-509-3p                           | 2 |
| <i>circSLC8A1</i> | miR-5094                             | 2 |
| <i>circSLC8A1</i> | miR-512-3p                           | 1 |
| <i>circSLC8A1</i> | miR-515-5p/519e-5p                   | 1 |
| <i>circSLC8A1</i> | miR-516a-3p/516b-3p/7162-5p          | 1 |
| <i>circSLC8A1</i> | miR-516b-5p                          | 1 |
| <i>circSLC8A1</i> | miR-5187-3p                          | 1 |
| <i>circSLC8A1</i> | miR-5192                             | 4 |
| <i>circSLC8A1</i> | miR-5193                             | 1 |
| <i>circSLC8A1</i> | miR-5196-3p                          | 2 |
| <i>circSLC8A1</i> | miR-5197-3p                          | 2 |
| <i>circSLC8A1</i> | miR-5197-5p                          | 1 |
| <i>circSLC8A1</i> | miR-522-3p                           | 2 |
| <i>circSLC8A1</i> | miR-548p                             | 1 |
| <i>circSLC8A1</i> | miR-5583-3p                          | 2 |
| <i>circSLC8A1</i> | miR-5585-3p                          | 1 |
| <i>circSLC8A1</i> | miR-5589-5p                          | 1 |
| <i>circSLC8A1</i> | miR-566                              | 1 |
| <i>circSLC8A1</i> | miR-5680                             | 1 |
| <i>circSLC8A1</i> | miR-5697                             | 1 |
| <i>circSLC8A1</i> | miR-5699-5p                          | 1 |
| <i>circSLC8A1</i> | miR-5705                             | 1 |
| <i>circSLC8A1</i> | miR-581                              | 2 |
| <i>circSLC8A1</i> | miR-583                              | 3 |
| <i>circSLC8A1</i> | miR-585-3p                           | 1 |
| <i>circSLC8A1</i> | miR-589-5p                           | 2 |
| <i>circSLC8A1</i> | miR-604                              | 1 |
| <i>circSLC8A1</i> | miR-6072/6891-3p                     | 1 |
| <i>circSLC8A1</i> | miR-6077                             | 4 |
| <i>circSLC8A1</i> | miR-6079                             | 2 |
| <i>circSLC8A1</i> | miR-6087                             | 1 |
| <i>circSLC8A1</i> | miR-612/1285-3p/3187-5p/5189-5p/6860 | 1 |
| <i>circSLC8A1</i> | miR-6128                             | 2 |
| <i>circSLC8A1</i> | miR-619-3p                           | 2 |

|                   |                    |   |
|-------------------|--------------------|---|
| <i>circSLC8A1</i> | miR-619-5p/6506-5p | 1 |
| <i>circSLC8A1</i> | miR-628-5p         | 1 |
| <i>circSLC8A1</i> | miR-631/3661       | 1 |
| <i>circSLC8A1</i> | miR-634            | 1 |
| <i>circSLC8A1</i> | miR-641/3617-5p    | 1 |
| <i>circSLC8A1</i> | miR-646            | 1 |
| <i>circSLC8A1</i> | miR-647            | 2 |
| <i>circSLC8A1</i> | miR-649            | 2 |
| <i>circSLC8A1</i> | miR-6500-3p        | 1 |
| <i>circSLC8A1</i> | miR-6503-3p        | 1 |
| <i>circSLC8A1</i> | miR-6505-5p        | 1 |
| <i>circSLC8A1</i> | miR-6507-5p        | 1 |
| <i>circSLC8A1</i> | miR-6512-5p        | 3 |
| <i>circSLC8A1</i> | miR-6513-5p        | 1 |
| <i>circSLC8A1</i> | miR-6516-5p        | 2 |
| <i>circSLC8A1</i> | miR-653-3p         | 1 |
| <i>circSLC8A1</i> | miR-660-3p         | 1 |
| <i>circSLC8A1</i> | miR-664a-5p/4794   | 1 |
| <i>circSLC8A1</i> | miR-6715a-3p       | 1 |
| <i>circSLC8A1</i> | miR-6719-3p        | 1 |
| <i>circSLC8A1</i> | miR-6722-5p        | 1 |
| <i>circSLC8A1</i> | miR-6730-3p        | 1 |
| <i>circSLC8A1</i> | miR-6731-5p/8085   | 1 |
| <i>circSLC8A1</i> | miR-6735-3p        | 1 |
| <i>circSLC8A1</i> | miR-6742-3p        | 1 |
| <i>circSLC8A1</i> | miR-6742-5p        | 1 |
| <i>circSLC8A1</i> | miR-6750-3p        | 1 |
| <i>circSLC8A1</i> | miR-6758-3p        | 1 |
| <i>circSLC8A1</i> | miR-6759-5p        | 1 |
| <i>circSLC8A1</i> | miR-6760-3p        | 1 |
| <i>circSLC8A1</i> | miR-6762-3p        | 1 |
| <i>circSLC8A1</i> | miR-6770-5p        | 2 |
| <i>circSLC8A1</i> | miR-6773-3p        | 1 |
| <i>circSLC8A1</i> | miR-6780b-3p       | 2 |
| <i>circSLC8A1</i> | miR-6789-3p        | 1 |
| <i>circSLC8A1</i> | miR-6796-5p        | 1 |
| <i>circSLC8A1</i> | miR-6808-3p        | 1 |
| <i>circSLC8A1</i> | miR-6810-5p        | 1 |

|                   |              |   |
|-------------------|--------------|---|
| <i>circSLC8A1</i> | miR-6815-3p  | 2 |
| <i>circSLC8A1</i> | miR-6818-3p  | 1 |
| <i>circSLC8A1</i> | miR-6831-3p  | 1 |
| <i>circSLC8A1</i> | miR-6833-5p  | 1 |
| <i>circSLC8A1</i> | miR-6842-3p  | 2 |
| <i>circSLC8A1</i> | miR-6851-3p  | 1 |
| <i>circSLC8A1</i> | miR-6852-5p  | 1 |
| <i>circSLC8A1</i> | miR-6853-3p  | 2 |
| <i>circSLC8A1</i> | miR-6857-5p  | 1 |
| <i>circSLC8A1</i> | miR-6878-3p  | 2 |
| <i>circSLC8A1</i> | miR-6878-5p  | 1 |
| <i>circSLC8A1</i> | miR-6882-3p  | 1 |
| <i>circSLC8A1</i> | miR-6886-3p  | 1 |
| <i>circSLC8A1</i> | miR-6888-5p  | 1 |
| <i>circSLC8A1</i> | miR-6890-5p  | 1 |
| <i>circSLC8A1</i> | miR-7-5p     | 4 |
| <i>circSLC8A1</i> | miR-7114-5p  | 1 |
| <i>circSLC8A1</i> | miR-7154-5p  | 1 |
| <i>circSLC8A1</i> | miR-767-5p   | 1 |
| <i>circSLC8A1</i> | miR-769-5p   | 1 |
| <i>circSLC8A1</i> | miR-770-5p   | 1 |
| <i>circSLC8A1</i> | miR-7703     | 1 |
| <i>circSLC8A1</i> | miR-7843-3p  | 1 |
| <i>circSLC8A1</i> | miR-7851-3p  | 2 |
| <i>circSLC8A1</i> | miR-8062     | 1 |
| <i>circSLC8A1</i> | miR-8064     | 1 |
| <i>circSLC8A1</i> | miR-8066     | 1 |
| <i>circSLC8A1</i> | miR-8084     | 1 |
| <i>circSLC8A1</i> | miR-874-3p   | 2 |
| <i>circSLC8A1</i> | miR-887-5p   | 1 |
| <i>circSLC8A1</i> | miR-888-3p   | 2 |
| <i>circSLC8A1</i> | miR-889-5p   | 1 |
| <i>circSLC8A1</i> | miR-890      | 1 |
| <i>circSLC8A1</i> | miR-892a     | 2 |
| <i>circSLC8A1</i> | miR-9-5p     | 1 |
| <i>circSLC8A1</i> | miR-92a-1-5p | 1 |
| <i>circSLC8A1</i> | miR-938      | 1 |
| <i>circSLC8A1</i> | miR-939-3p   | 1 |

|                   |                          |   |
|-------------------|--------------------------|---|
| <i>circSLC8A1</i> | miR-943                  | 2 |
| <i>circSLC8A1</i> | miR-1183                 | 1 |
| <i>circSLC8A1</i> | miR-1224-5p              | 3 |
| <i>circSLC8A1</i> | miR-1233-3p              | 1 |
| <i>circSLC8A1</i> | miR-1236-5p              | 1 |
| <i>circSLC8A1</i> | miR-1237-3p              | 1 |
| <i>circSLC8A1</i> | miR-1238-5p/4758-5p      | 1 |
| <i>circSLC8A1</i> | miR-124-5p               | 1 |
| <i>circSLC8A1</i> | miR-1246                 | 1 |
| <i>circSLC8A1</i> | miR-1248                 | 1 |
| <i>circSLC8A1</i> | miR-1254/3116            | 1 |
| <i>circSLC8A1</i> | miR-1261                 | 1 |
| <i>circSLC8A1</i> | miR-1273e                | 1 |
| <i>circSLC8A1</i> | miR-1273f                | 1 |
| <i>circSLC8A1</i> | miR-1286                 | 1 |
| <i>circSLC8A1</i> | miR-1294                 | 1 |
| <i>circSLC8A1</i> | miR-130-3p/301-3p/454-3p | 1 |
| <i>circSLC8A1</i> | miR-1304-5p              | 1 |
| <i>circSLC8A1</i> | miR-1323                 | 1 |
| <i>circSLC8A1</i> | miR-139-3p               | 1 |
| <i>circSLC8A1</i> | miR-141-5p               | 1 |
| <i>circSLC8A1</i> | miR-143-3p               | 1 |
| <i>circSLC8A1</i> | miR-1468-3p              | 1 |
| <i>circSLC8A1</i> | miR-146b-3p              | 1 |
| <i>circSLC8A1</i> | miR-16-2-3p/195-3p       | 1 |
| <i>circSLC8A1</i> | miR-18-5p                | 1 |
| <i>circSLC8A1</i> | miR-183-3p               | 1 |
| <i>circSLC8A1</i> | miR-1909-5p              | 1 |
| <i>circSLC8A1</i> | miR-197-3p               | 1 |
| <i>circSLC8A1</i> | miR-204-5p/211-5p        | 1 |
| <i>circSLC8A1</i> | miR-2054                 | 1 |
| <i>circSLC8A1</i> | miR-218-5p               | 1 |
| <i>circSLC8A1</i> | miR-27b-5p               | 1 |
| <i>circSLC8A1</i> | miR-3074-3p              | 1 |
| <i>circSLC8A1</i> | miR-3120-5p              | 1 |
| <i>circSLC8A1</i> | miR-3146                 | 1 |
| <i>circSLC8A1</i> | miR-3148                 | 1 |
| <i>circSLC8A1</i> | miR-3156-5p              | 1 |

|                   |                       |   |
|-------------------|-----------------------|---|
| <i>circSLC8A1</i> | miR-3165              | 1 |
| <i>circSLC8A1</i> | miR-3173-5p           | 1 |
| <i>circSLC8A1</i> | miR-3174              | 1 |
| <i>circSLC8A1</i> | miR-337-3p            | 1 |
| <i>circSLC8A1</i> | miR-338-5p            | 2 |
| <i>circSLC8A1</i> | miR-339-5p            | 1 |
| <i>circSLC8A1</i> | miR-361-5p            | 1 |
| <i>circSLC8A1</i> | miR-3662              | 1 |
| <i>circSLC8A1</i> | miR-3667-5p           | 1 |
| <i>circSLC8A1</i> | miR-376b-5p/376c-5p   | 1 |
| <i>circSLC8A1</i> | miR-383-5p.2          | 1 |
| <i>circSLC8A1</i> | miR-3914              | 1 |
| <i>circSLC8A1</i> | miR-3915              | 3 |
| <i>circSLC8A1</i> | miR-3936              | 1 |
| <i>circSLC8A1</i> | miR-3943              | 1 |
| <i>circSLC8A1</i> | miR-3944-5p           | 1 |
| <i>circSLC8A1</i> | miR-412-3p/6754-3p    | 1 |
| <i>circSLC8A1</i> | miR-4258              | 1 |
| <i>circSLC8A1</i> | miR-4272              | 1 |
| <i>circSLC8A1</i> | miR-4287/4685-3p      | 1 |
| <i>circSLC8A1</i> | miR-4299              | 1 |
| <i>circSLC8A1</i> | miR-4316              | 1 |
| <i>circSLC8A1</i> | miR-4323              | 1 |
| <i>circSLC8A1</i> | miR-4327              | 1 |
| <i>circSLC8A1</i> | miR-4328              | 1 |
| <i>circSLC8A1</i> | miR-4421/5699-3p      | 1 |
| <i>circSLC8A1</i> | miR-4433b-3p          | 1 |
| <i>circSLC8A1</i> | miR-4452              | 1 |
| <i>circSLC8A1</i> | miR-4453/4538         | 1 |
| <i>circSLC8A1</i> | miR-4456              | 1 |
| <i>circSLC8A1</i> | miR-4469              | 1 |
| <i>circSLC8A1</i> | miR-4485-5p           | 1 |
| <i>circSLC8A1</i> | miR-4496              | 1 |
| <i>circSLC8A1</i> | miR-449c-3p           | 1 |
| <i>circSLC8A1</i> | miR-4658/6790-5p      | 1 |
| <i>circSLC8A1</i> | miR-4659a-3p/4659b-3p | 1 |
| <i>circSLC8A1</i> | miR-4683              | 1 |
| <i>circSLC8A1</i> | miR-4684-5p           | 1 |



|                   |                                                                  |   |
|-------------------|------------------------------------------------------------------|---|
| <i>circSLC8A1</i> | miR-4689/6858-5p                                                 | 3 |
| <i>circSLC8A1</i> | miR-4698                                                         | 1 |
| <i>circSLC8A1</i> | miR-4700-3p                                                      | 1 |
| <i>circSLC8A1</i> | miR-4704-3p                                                      | 1 |
| <i>circSLC8A1</i> | miR-4708-5p                                                      | 1 |
| <i>circSLC8A1</i> | miR-4712-3p                                                      | 2 |
| <i>circSLC8A1</i> | miR-4713-5p                                                      | 1 |
| <i>circSLC8A1</i> | miR-4714-3p                                                      | 1 |
| <i>circSLC8A1</i> | miR-4722-5p                                                      | 1 |
| <i>circSLC8A1</i> | miR-4760-3p                                                      | 1 |
| <i>circSLC8A1</i> | miR-4761-5p                                                      | 2 |
| <i>circSLC8A1</i> | miR-4765                                                         | 1 |
| <i>circSLC8A1</i> | miR-4768-5p/6833-3p                                              | 1 |
| <i>circSLC8A1</i> | miR-4778-3p                                                      | 1 |
| <i>circSLC8A1</i> | miR-496.1                                                        | 1 |
| <i>circSLC8A1</i> | miR-498                                                          | 1 |
| <i>circSLC8A1</i> | miR-500a-5p                                                      | 1 |
| <i>circSLC8A1</i> | miR-502-5p                                                       | 1 |
| <i>circSLC8A1</i> | miR-511-5p                                                       | 1 |
| <i>circSLC8A1</i> | miR-513b-5p                                                      | 1 |
| <i>circSLC8A1</i> | miR-5186                                                         | 1 |
| <i>circSLC8A1</i> | miR-5189-3p                                                      | 1 |
| <i>circSLC8A1</i> | miR-518a-5p/527                                                  | 1 |
| <i>circSLC8A1</i> | miR-520g-5p                                                      | 1 |
| <i>circSLC8A1</i> | miR-539-5p                                                       | 2 |
| <i>circSLC8A1</i> | miR-548ac/548bb-3p/548d-3p/548h-3p/548z                          |   |
| <i>circSLC8A1</i> | miR-548ai/548ag/548ba/570-5p                                     | 1 |
| <i>circSLC8A1</i> | miR-548aj-5p/548f-5p/548g-5p/548x-5p                             | 1 |
| <i>circSLC8A1</i> | miR-548ao-3p                                                     | 1 |
| <i>circSLC8A1</i> | miR-548aq-3p/548am-3p/548aj-3p/548ah-3p/548ae-3p/548j-3p/548x-3p |   |
| <i>circSLC8A1</i> | miR-548aw                                                        | 1 |
| <i>circSLC8A1</i> | miR-548q                                                         | 1 |
| <i>circSLC8A1</i> | miR-556-5p                                                       | 1 |
| <i>circSLC8A1</i> | miR-5586-3p                                                      | 1 |
| <i>circSLC8A1</i> | miR-561-5p                                                       | 2 |
| <i>circSLC8A1</i> | miR-5681a                                                        | 1 |
| <i>circSLC8A1</i> | miR-5694                                                         | 1 |
| <i>circSLC8A1</i> | miR-580-3p                                                       | 3 |

|                   |                     |   |
|-------------------|---------------------|---|
| <i>circSLC8A1</i> | miR-582-3p          | 2 |
| <i>circSLC8A1</i> | miR-6078            | 1 |
| <i>circSLC8A1</i> | miR-6124            | 1 |
| <i>circSLC8A1</i> | miR-623             | 1 |
| <i>circSLC8A1</i> | miR-629-3p          | 1 |
| <i>circSLC8A1</i> | miR-636             | 1 |
| <i>circSLC8A1</i> | miR-6511-5p         | 1 |
| <i>circSLC8A1</i> | miR-661             | 1 |
| <i>circSLC8A1</i> | miR-6730-5p         | 1 |
| <i>circSLC8A1</i> | miR-6740-3p         | 1 |
| <i>circSLC8A1</i> | miR-6748-3p         | 1 |
| <i>circSLC8A1</i> | miR-6759-3p         | 1 |
| <i>circSLC8A1</i> | miR-676-5p          | 1 |
| <i>circSLC8A1</i> | miR-6769a-3p        | 1 |
| <i>circSLC8A1</i> | miR-6783-5p         | 1 |
| <i>circSLC8A1</i> | miR-6809-3p         | 1 |
| <i>circSLC8A1</i> | miR-6815-5p/6865-5p | 1 |
| <i>circSLC8A1</i> | miR-6817-3p         | 1 |
| <i>circSLC8A1</i> | miR-6837-3p         | 1 |
| <i>circSLC8A1</i> | miR-6867-3p         | 1 |
| <i>circSLC8A1</i> | miR-6873-3p         | 1 |
| <i>circSLC8A1</i> | miR-6875-3p         | 1 |
| <i>circSLC8A1</i> | miR-6880-5p         | 1 |
| <i>circSLC8A1</i> | miR-7-3p            | 1 |
| <i>circSLC8A1</i> | miR-7108-3p         | 1 |
| <i>circSLC8A1</i> | miR-7110-3p         | 1 |
| <i>circSLC8A1</i> | miR-7113-3p         | 1 |
| <i>circSLC8A1</i> | miR-7847-3p         | 1 |
| <i>circSLC8A1</i> | miR-7976            | 1 |
| <i>circSLC8A1</i> | miR-7978            | 1 |
| <i>circSLC8A1</i> | miR-8063            | 1 |
| <i>circSLC8A1</i> | miR-8071            | 1 |
| <i>circSLC8A1</i> | miR-873-5p.1        | 3 |
| <i>circSLC8A1</i> | miR-873-5p.2        | 1 |
| <i>circSLC8A1</i> | miR-885-5p          | 1 |
| <i>circSLC8A1</i> | miR-942-5p          | 1 |
| <i>circSLC8A1</i> | miR-95-5p           | 1 |
| <i>circSLC8A1</i> | miR-1911-5p         | 1 |

|                   |                                       |   |
|-------------------|---------------------------------------|---|
| <i>circSLC8A1</i> | miR-5089-3p                           | 1 |
| <i>circSLC8A3</i> | let-7a-3p/let-7b-3p/let-7f-1-3p/98-3p | 1 |
| <i>circSLC8A3</i> | let-7f-2-3p/1185-3p                   | 1 |
| <i>circSLC8A3</i> | miR-1-3p/206                          | 1 |
| <i>circSLC8A3</i> | miR-101-3p.1                          | 1 |
| <i>circSLC8A3</i> | miR-101-3p.2                          | 1 |
| <i>circSLC8A3</i> | miR-103-3p/107                        | 1 |
| <i>circSLC8A3</i> | miR-106a-3p                           | 1 |
| <i>circSLC8A3</i> | miR-1178-5p                           | 2 |
| <i>circSLC8A3</i> | miR-1180-5p                           | 2 |
| <i>circSLC8A3</i> | miR-1182                              | 2 |
| <i>circSLC8A3</i> | miR-1185-5p                           | 2 |
| <i>circSLC8A3</i> | miR-1193                              | 1 |
| <i>circSLC8A3</i> | miR-1197                              | 2 |
| <i>circSLC8A3</i> | miR-1200                              | 4 |
| <i>circSLC8A3</i> | miR-1202/3972                         | 1 |
| <i>circSLC8A3</i> | miR-1203                              | 1 |
| <i>circSLC8A3</i> | miR-1206                              | 2 |
| <i>circSLC8A3</i> | miR-1207-3p                           | 1 |
| <i>circSLC8A3</i> | miR-122-5p                            | 1 |
| <i>circSLC8A3</i> | miR-1224-3p                           | 1 |
| <i>circSLC8A3</i> | miR-1224-5p                           | 4 |
| <i>circSLC8A3</i> | miR-1225-3p                           | 1 |
| <i>circSLC8A3</i> | miR-1227-3p                           | 1 |
| <i>circSLC8A3</i> | miR-1227-5p                           | 1 |
| <i>circSLC8A3</i> | miR-1228-3p                           | 1 |
| <i>circSLC8A3</i> | miR-1229-3p                           | 1 |
| <i>circSLC8A3</i> | miR-1236-3p                           | 3 |
| <i>circSLC8A3</i> | miR-1237-3p                           | 3 |
| <i>circSLC8A3</i> | miR-1238-3p                           | 2 |
| <i>circSLC8A3</i> | miR-124-5p                            | 1 |
| <i>circSLC8A3</i> | miR-1245b-5p                          | 2 |
| <i>circSLC8A3</i> | miR-1246                              | 1 |
| <i>circSLC8A3</i> | miR-1247-3p                           | 1 |
| <i>circSLC8A3</i> | miR-1248                              | 3 |
| <i>circSLC8A3</i> | miR-1249-5p/6797-5p                   | 2 |
| <i>circSLC8A3</i> | miR-125-5p                            | 1 |
| <i>circSLC8A3</i> | miR-1250-3p                           | 3 |

|                   |                          |   |
|-------------------|--------------------------|---|
| <i>circSLC8A3</i> | miR-1252-3p              | 1 |
| <i>circSLC8A3</i> | miR-1252-5p              | 3 |
| <i>circSLC8A3</i> | miR-1253                 | 1 |
| <i>circSLC8A3</i> | miR-1254/3116            | 2 |
| <i>circSLC8A3</i> | miR-1255a/1255b-5p       | 3 |
| <i>circSLC8A3</i> | miR-1255b-2-3p           | 1 |
| <i>circSLC8A3</i> | miR-1256                 | 1 |
| <i>circSLC8A3</i> | miR-125a-3p              | 1 |
| <i>circSLC8A3</i> | miR-126-3p.2             | 1 |
| <i>circSLC8A3</i> | miR-1260a/1260b          | 1 |
| <i>circSLC8A3</i> | miR-1262/4701-3p/6736-5p | 1 |
| <i>circSLC8A3</i> | miR-1263                 | 1 |
| <i>circSLC8A3</i> | miR-1264                 | 1 |
| <i>circSLC8A3</i> | miR-1265                 | 2 |
| <i>circSLC8A3</i> | miR-1266-3p              | 1 |
| <i>circSLC8A3</i> | miR-1266-5p/4518         | 1 |
| <i>circSLC8A3</i> | miR-1269                 | 1 |
| <i>circSLC8A3</i> | miR-127-5p               | 2 |
| <i>circSLC8A3</i> | miR-1270                 | 3 |
| <i>circSLC8A3</i> | miR-1272                 | 3 |
| <i>circSLC8A3</i> | miR-1273d                | 1 |
| <i>circSLC8A3</i> | miR-1273e                | 1 |
| <i>circSLC8A3</i> | miR-1273f                | 3 |
| <i>circSLC8A3</i> | miR-1273g-5p             | 2 |
| <i>circSLC8A3</i> | miR-128-3p               | 1 |
| <i>circSLC8A3</i> | miR-1283                 | 2 |
| <i>circSLC8A3</i> | miR-1284                 | 1 |
| <i>circSLC8A3</i> | miR-1288-3p              | 1 |
| <i>circSLC8A3</i> | miR-129-5p               | 1 |
| <i>circSLC8A3</i> | miR-1291/6775-3p         | 2 |
| <i>circSLC8A3</i> | miR-1292-5p              | 1 |
| <i>circSLC8A3</i> | miR-1293/4483            | 2 |
| <i>circSLC8A3</i> | miR-1294                 | 2 |
| <i>circSLC8A3</i> | miR-1295b-5p/1912        | 2 |
| <i>circSLC8A3</i> | miR-1298-3p              | 3 |
| <i>circSLC8A3</i> | miR-1299                 | 1 |
| <i>circSLC8A3</i> | miR-130-3p/301-3p/454-3p | 1 |
| <i>circSLC8A3</i> | miR-1301-3p              | 3 |

|                   |                                      |   |
|-------------------|--------------------------------------|---|
| <i>circSLC8A3</i> | miR-1301-5p/6502-5p                  | 1 |
| <i>circSLC8A3</i> | miR-1302/4298                        | 1 |
| <i>circSLC8A3</i> | miR-1304-3p                          | 1 |
| <i>circSLC8A3</i> | miR-1304-5p                          | 2 |
| <i>circSLC8A3</i> | miR-1306-3p                          | 1 |
| <i>circSLC8A3</i> | miR-130b-5p                          | 2 |
| <i>circSLC8A3</i> | miR-132-3p/212-3p                    | 1 |
| <i>circSLC8A3</i> | miR-132-5p                           | 1 |
| <i>circSLC8A3</i> | miR-1322                             | 3 |
| <i>circSLC8A3</i> | miR-1323                             | 1 |
| <i>circSLC8A3</i> | miR-1324                             | 1 |
| <i>circSLC8A3</i> | miR-133a-3p.1                        | 1 |
| <i>circSLC8A3</i> | miR-133a-5p                          | 4 |
| <i>circSLC8A3</i> | miR-134-3p                           | 1 |
| <i>circSLC8A3</i> | miR-135b-3p                          | 1 |
| <i>circSLC8A3</i> | miR-136-3p                           | 2 |
| <i>circSLC8A3</i> | miR-136-5p                           | 1 |
| <i>circSLC8A3</i> | miR-138-2-3p                         | 1 |
| <i>circSLC8A3</i> | miR-138-5p                           | 4 |
| <i>circSLC8A3</i> | miR-139-3p                           | 1 |
| <i>circSLC8A3</i> | miR-140-3p.1                         | 1 |
| <i>circSLC8A3</i> | miR-140-5p                           | 2 |
| <i>circSLC8A3</i> | miR-141-3p/200-3p                    | 1 |
| <i>circSLC8A3</i> | miR-141-5p                           | 2 |
| <i>circSLC8A3</i> | miR-143-3p                           | 3 |
| <i>circSLC8A3</i> | miR-144-3p                           | 1 |
| <i>circSLC8A3</i> | miR-145-3p                           | 1 |
| <i>circSLC8A3</i> | miR-145-5p                           | 1 |
| <i>circSLC8A3</i> | miR-146-5p                           | 2 |
| <i>circSLC8A3</i> | miR-1468-3p                          | 1 |
| <i>circSLC8A3</i> | miR-146b-3p                          | 2 |
| <i>circSLC8A3</i> | miR-147a                             | 3 |
| <i>circSLC8A3</i> | miR-148-3p/152-3p                    | 1 |
| <i>circSLC8A3</i> | miR-148b-5p/6874-3p                  | 1 |
| <i>circSLC8A3</i> | miR-149-3p/4728-5p/6785-5p/6883-5p   | 1 |
| <i>circSLC8A3</i> | miR-149-5p                           | 1 |
| <i>circSLC8A3</i> | miR-15-5p/16-5p/195-5p/424-5p/497-5p | 1 |
| <i>circSLC8A3</i> | miR-150-3p                           | 1 |

|                   |                     |   |
|-------------------|---------------------|---|
| <i>circSLC8A3</i> | miR-151-5p          | 1 |
| <i>circSLC8A3</i> | miR-152-5p          | 3 |
| <i>circSLC8A3</i> | miR-1537-5p         | 1 |
| <i>circSLC8A3</i> | miR-154-3p/487-3p   | 1 |
| <i>circSLC8A3</i> | miR-1587/3620-5p    | 1 |
| <i>circSLC8A3</i> | miR-16-2-3p/195-3p  | 2 |
| <i>circSLC8A3</i> | miR-182-3p          | 2 |
| <i>circSLC8A3</i> | miR-182-5p          | 1 |
| <i>circSLC8A3</i> | miR-1825            | 3 |
| <i>circSLC8A3</i> | miR-183-3p          | 1 |
| <i>circSLC8A3</i> | miR-183-5p.1        | 1 |
| <i>circSLC8A3</i> | miR-185-3p          | 2 |
| <i>circSLC8A3</i> | miR-185-5p          | 2 |
| <i>circSLC8A3</i> | miR-186-3p          | 1 |
| <i>circSLC8A3</i> | miR-188-3p          | 1 |
| <i>circSLC8A3</i> | miR-1909-3p/6722-3p | 1 |
| <i>circSLC8A3</i> | miR-1909-5p         | 1 |
| <i>circSLC8A3</i> | miR-1915-5p         | 1 |
| <i>circSLC8A3</i> | miR-192-3p          | 3 |
| <i>circSLC8A3</i> | miR-193a-5p         | 1 |
| <i>circSLC8A3</i> | miR-194-3p          | 2 |
| <i>circSLC8A3</i> | miR-196b-3p         | 1 |
| <i>circSLC8A3</i> | miR-1973            | 1 |
| <i>circSLC8A3</i> | miR-1976            | 2 |
| <i>circSLC8A3</i> | miR-198             | 1 |
| <i>circSLC8A3</i> | miR-199-3p          | 1 |
| <i>circSLC8A3</i> | miR-199-5p          | 3 |
| <i>circSLC8A3</i> | miR-203a-5p         | 2 |
| <i>circSLC8A3</i> | miR-203b-5p/6718-5p | 1 |
| <i>circSLC8A3</i> | miR-204-3p/4646-5p  | 1 |
| <i>circSLC8A3</i> | miR-204-5p/211-5p   | 2 |
| <i>circSLC8A3</i> | miR-205-5p          | 1 |
| <i>circSLC8A3</i> | miR-21-3p/3591-3p   | 2 |
| <i>circSLC8A3</i> | miR-210-5p          | 1 |
| <i>circSLC8A3</i> | miR-211-3p          | 1 |
| <i>circSLC8A3</i> | miR-2110            | 2 |
| <i>circSLC8A3</i> | miR-2113            | 2 |
| <i>circSLC8A3</i> | miR-2114-3p         | 1 |

|                   |                     |   |
|-------------------|---------------------|---|
| <i>circSLC8A3</i> | miR-2114-5p         | 1 |
| <i>circSLC8A3</i> | miR-2116-5p         | 1 |
| <i>circSLC8A3</i> | miR-2117            | 1 |
| <i>circSLC8A3</i> | miR-212-5p          | 2 |
| <i>circSLC8A3</i> | miR-214-3p/3619-5p  | 1 |
| <i>circSLC8A3</i> | miR-217             | 1 |
| <i>circSLC8A3</i> | miR-218-1-3p        | 2 |
| <i>circSLC8A3</i> | miR-218-2-3p        | 2 |
| <i>circSLC8A3</i> | miR-218-5p          | 1 |
| <i>circSLC8A3</i> | miR-219a-1-3p       | 1 |
| <i>circSLC8A3</i> | miR-22-5p           | 1 |
| <i>circSLC8A3</i> | miR-223-3p          | 1 |
| <i>circSLC8A3</i> | miR-224-5p          | 1 |
| <i>circSLC8A3</i> | miR-2276-3p         | 2 |
| <i>circSLC8A3</i> | miR-2277-3p         | 1 |
| <i>circSLC8A3</i> | miR-23-5p           | 1 |
| <i>circSLC8A3</i> | miR-2392            | 3 |
| <i>circSLC8A3</i> | miR-24-3p           | 1 |
| <i>circSLC8A3</i> | miR-24-5p           | 1 |
| <i>circSLC8A3</i> | miR-2467-3p         | 2 |
| <i>circSLC8A3</i> | miR-2467-5p         | 1 |
| <i>circSLC8A3</i> | miR-26-3p           | 2 |
| <i>circSLC8A3</i> | miR-2682-3p/6781-3p | 1 |
| <i>circSLC8A3</i> | miR-26b-3p          | 1 |
| <i>circSLC8A3</i> | miR-27-3p           | 1 |
| <i>circSLC8A3</i> | miR-28-5p/708-5p    | 1 |
| <i>circSLC8A3</i> | miR-297             | 2 |
| <i>circSLC8A3</i> | miR-298             | 2 |
| <i>circSLC8A3</i> | miR-299-3p          | 1 |
| <i>circSLC8A3</i> | miR-302b-5p/302d-5p | 1 |
| <i>circSLC8A3</i> | miR-3064-3p         | 1 |
| <i>circSLC8A3</i> | miR-3064-5p         | 2 |
| <i>circSLC8A3</i> | miR-3065-3p         | 1 |
| <i>circSLC8A3</i> | miR-3074-5p         | 1 |
| <i>circSLC8A3</i> | miR-3115            | 1 |
| <i>circSLC8A3</i> | miR-3117-3p         | 1 |
| <i>circSLC8A3</i> | miR-3120-5p         | 1 |
| <i>circSLC8A3</i> | miR-3121-5p         | 1 |

|                   |                          |   |
|-------------------|--------------------------|---|
| <i>circSLC8A3</i> | miR-3122/3913-5p         | 1 |
| <i>circSLC8A3</i> | miR-3123                 | 1 |
| <i>circSLC8A3</i> | miR-3124-3p              | 2 |
| <i>circSLC8A3</i> | miR-3125/3916/6859-5p    | 3 |
| <i>circSLC8A3</i> | miR-3126-3p              | 3 |
| <i>circSLC8A3</i> | miR-3126-5p              | 1 |
| <i>circSLC8A3</i> | miR-3127-3p/6756-3p      | 2 |
| <i>circSLC8A3</i> | miR-3127-5p              | 2 |
| <i>circSLC8A3</i> | miR-3128                 | 1 |
| <i>circSLC8A3</i> | miR-3130-5p/4482-5p      | 2 |
| <i>circSLC8A3</i> | miR-3134                 | 1 |
| <i>circSLC8A3</i> | miR-3136-5p/4439         | 1 |
| <i>circSLC8A3</i> | miR-3138                 | 1 |
| <i>circSLC8A3</i> | miR-3140-5p              | 2 |
| <i>circSLC8A3</i> | miR-3144-5p              | 2 |
| <i>circSLC8A3</i> | miR-3148                 | 1 |
| <i>circSLC8A3</i> | miR-3150a-3p             | 2 |
| <i>circSLC8A3</i> | miR-3150b-3p             | 4 |
| <i>circSLC8A3</i> | miR-3151-5p              | 1 |
| <i>circSLC8A3</i> | miR-3152-3p              | 1 |
| <i>circSLC8A3</i> | miR-3152-5p              | 2 |
| <i>circSLC8A3</i> | miR-3153/6733-5p/6739-5p | 1 |
| <i>circSLC8A3</i> | miR-3154                 | 4 |
| <i>circSLC8A3</i> | miR-3156-3p              | 1 |
| <i>circSLC8A3</i> | miR-3156-5p              | 1 |
| <i>circSLC8A3</i> | miR-3162-5p              | 1 |
| <i>circSLC8A3</i> | miR-3165                 | 1 |
| <i>circSLC8A3</i> | miR-3168                 | 1 |
| <i>circSLC8A3</i> | miR-3169                 | 3 |
| <i>circSLC8A3</i> | miR-3170/6855-5p         | 1 |
| <i>circSLC8A3</i> | miR-3173-3p/6891-5p      | 2 |
| <i>circSLC8A3</i> | miR-3173-5p              | 2 |
| <i>circSLC8A3</i> | miR-3174                 | 1 |
| <i>circSLC8A3</i> | miR-3175                 | 2 |
| <i>circSLC8A3</i> | miR-3176/3922-3p         | 2 |
| <i>circSLC8A3</i> | miR-3177-3p              | 1 |
| <i>circSLC8A3</i> | miR-3179                 | 2 |
| <i>circSLC8A3</i> | miR-3180-5p              | 1 |



|                   |                           |   |
|-------------------|---------------------------|---|
| <i>circSLC8A3</i> | miR-3181                  | 1 |
| <i>circSLC8A3</i> | miR-3182                  | 1 |
| <i>circSLC8A3</i> | miR-3183/4723-3p/6769b-3p | 3 |
| <i>circSLC8A3</i> | miR-3184-3p               | 1 |
| <i>circSLC8A3</i> | miR-3185                  | 1 |
| <i>circSLC8A3</i> | miR-3187-3p               | 2 |
| <i>circSLC8A3</i> | miR-3188                  | 1 |
| <i>circSLC8A3</i> | miR-3189-3p               | 2 |
| <i>circSLC8A3</i> | miR-3190-5p               | 2 |
| <i>circSLC8A3</i> | miR-3191-3p               | 2 |
| <i>circSLC8A3</i> | miR-3191-5p               | 1 |
| <i>circSLC8A3</i> | miR-3192-5p               | 1 |
| <i>circSLC8A3</i> | miR-3193                  | 1 |
| <i>circSLC8A3</i> | miR-3198/4309             | 1 |
| <i>circSLC8A3</i> | miR-3200-5p               | 1 |
| <i>circSLC8A3</i> | miR-3202                  | 3 |
| <i>circSLC8A3</i> | miR-323a-5p               | 1 |
| <i>circSLC8A3</i> | miR-326                   | 1 |
| <i>circSLC8A3</i> | miR-328-3p                | 2 |
| <i>circSLC8A3</i> | miR-331-3p                | 2 |
| <i>circSLC8A3</i> | miR-335-5p                | 1 |
| <i>circSLC8A3</i> | miR-338-3p                | 3 |
| <i>circSLC8A3</i> | miR-33b-3p/515-3p/519e-3p | 1 |
| <i>circSLC8A3</i> | miR-34-5p/449-5p          | 1 |
| <i>circSLC8A3</i> | miR-342-5p/4664-5p        | 1 |
| <i>circSLC8A3</i> | miR-345-3p                | 2 |
| <i>circSLC8A3</i> | miR-345-5p                | 2 |
| <i>circSLC8A3</i> | miR-34a-3p                | 1 |
| <i>circSLC8A3</i> | miR-3605-3p               | 1 |
| <i>circSLC8A3</i> | miR-3605-5p               | 2 |
| <i>circSLC8A3</i> | miR-361-5p                | 1 |
| <i>circSLC8A3</i> | miR-3613-3p               | 2 |
| <i>circSLC8A3</i> | miR-3614-3p               | 1 |
| <i>circSLC8A3</i> | miR-3616-3p               | 1 |
| <i>circSLC8A3</i> | miR-3617-3p               | 1 |
| <i>circSLC8A3</i> | miR-3618                  | 1 |
| <i>circSLC8A3</i> | miR-363-5p/6745           | 2 |
| <i>circSLC8A3</i> | miR-3646                  | 1 |

|                   |                                   |   |
|-------------------|-----------------------------------|---|
| <i>circSLC8A3</i> | miR-3649                          | 1 |
| <i>circSLC8A3</i> | miR-3650                          | 2 |
| <i>circSLC8A3</i> | miR-3652/4430                     | 2 |
| <i>circSLC8A3</i> | miR-3653-3p                       | 1 |
| <i>circSLC8A3</i> | miR-3653-5p                       | 2 |
| <i>circSLC8A3</i> | miR-3657                          | 2 |
| <i>circSLC8A3</i> | miR-3658                          | 1 |
| <i>circSLC8A3</i> | miR-3660/4526                     | 1 |
| <i>circSLC8A3</i> | miR-3662                          | 1 |
| <i>circSLC8A3</i> | miR-3664-3p                       | 1 |
| <i>circSLC8A3</i> | miR-3667-3p                       | 2 |
| <i>circSLC8A3</i> | miR-3667-5p                       | 1 |
| <i>circSLC8A3</i> | miR-3674                          | 1 |
| <i>circSLC8A3</i> | miR-3675-5p                       | 1 |
| <i>circSLC8A3</i> | miR-3677-5p                       | 1 |
| <i>circSLC8A3</i> | miR-3681-5p                       | 1 |
| <i>circSLC8A3</i> | miR-3682-3p                       | 2 |
| <i>circSLC8A3</i> | miR-3688-5p                       | 1 |
| <i>circSLC8A3</i> | miR-3689a-5p/3689b-5p/3689e/3689f | 1 |
| <i>circSLC8A3</i> | miR-3689d/6851-5p                 | 2 |
| <i>circSLC8A3</i> | miR-3690                          | 2 |
| <i>circSLC8A3</i> | miR-3691-5p                       | 1 |
| <i>circSLC8A3</i> | miR-3713                          | 1 |
| <i>circSLC8A3</i> | miR-371a-3p                       | 1 |
| <i>circSLC8A3</i> | miR-371b-3p                       | 1 |
| <i>circSLC8A3</i> | miR-374a-3p                       | 1 |
| <i>circSLC8A3</i> | miR-376-3p                        | 1 |
| <i>circSLC8A3</i> | miR-378a-5p                       | 4 |
| <i>circSLC8A3</i> | miR-380-5p/563                    | 1 |
| <i>circSLC8A3</i> | miR-381-5p                        | 1 |
| <i>circSLC8A3</i> | miR-382-3p                        | 2 |
| <i>circSLC8A3</i> | miR-383-3p                        | 1 |
| <i>circSLC8A3</i> | miR-383-5p.1                      | 1 |
| <i>circSLC8A3</i> | miR-383-5p.2                      | 2 |
| <i>circSLC8A3</i> | miR-3907                          | 1 |
| <i>circSLC8A3</i> | miR-3908                          | 2 |
| <i>circSLC8A3</i> | miR-3911                          | 3 |
| <i>circSLC8A3</i> | miR-3912-5p                       | 1 |

|                   |                     |   |
|-------------------|---------------------|---|
| <i>circSLC8A3</i> | miR-3913-3p         | 1 |
| <i>circSLC8A3</i> | miR-3915            | 4 |
| <i>circSLC8A3</i> | miR-3918            | 1 |
| <i>circSLC8A3</i> | miR-3919            | 2 |
| <i>circSLC8A3</i> | miR-3925-3p         | 2 |
| <i>circSLC8A3</i> | miR-3925-5p         | 1 |
| <i>circSLC8A3</i> | miR-3926            | 1 |
| <i>circSLC8A3</i> | miR-3927-5p         | 1 |
| <i>circSLC8A3</i> | miR-3928-3p         | 2 |
| <i>circSLC8A3</i> | miR-3929/4419b/4478 | 1 |
| <i>circSLC8A3</i> | miR-3934-3p         | 1 |
| <i>circSLC8A3</i> | miR-3934-5p         | 1 |
| <i>circSLC8A3</i> | miR-3936            | 1 |
| <i>circSLC8A3</i> | miR-3938            | 1 |
| <i>circSLC8A3</i> | miR-3940-5p/4507    | 2 |
| <i>circSLC8A3</i> | miR-3942-5p         | 2 |
| <i>circSLC8A3</i> | miR-3944-3p         | 1 |
| <i>circSLC8A3</i> | miR-3944-5p         | 2 |
| <i>circSLC8A3</i> | miR-3945            | 2 |
| <i>circSLC8A3</i> | miR-3974            | 1 |
| <i>circSLC8A3</i> | miR-3975            | 1 |
| <i>circSLC8A3</i> | miR-3976            | 2 |
| <i>circSLC8A3</i> | miR-409-5p          | 1 |
| <i>circSLC8A3</i> | miR-411-3p          | 1 |
| <i>circSLC8A3</i> | miR-411-5p.1        | 1 |
| <i>circSLC8A3</i> | miR-412-3p/6754-3p  | 1 |
| <i>circSLC8A3</i> | miR-421             | 2 |
| <i>circSLC8A3</i> | miR-423-5p          | 1 |
| <i>circSLC8A3</i> | miR-4251            | 1 |
| <i>circSLC8A3</i> | miR-4252            | 1 |
| <i>circSLC8A3</i> | miR-4253/6862-5p    | 2 |
| <i>circSLC8A3</i> | miR-4254            | 2 |
| <i>circSLC8A3</i> | miR-4257            | 5 |
| <i>circSLC8A3</i> | miR-4259            | 1 |
| <i>circSLC8A3</i> | miR-4260            | 2 |
| <i>circSLC8A3</i> | miR-4265/4296/4322  | 1 |
| <i>circSLC8A3</i> | miR-4268            | 1 |
| <i>circSLC8A3</i> | miR-4269/6715b-5p   | 2 |

|                   |                                              |   |
|-------------------|----------------------------------------------|---|
| <i>circSLC8A3</i> | miR-4272                                     | 2 |
| <i>circSLC8A3</i> | miR-4273/7156-5p                             | 1 |
| <i>circSLC8A3</i> | miR-4275                                     | 2 |
| <i>circSLC8A3</i> | miR-4276                                     | 1 |
| <i>circSLC8A3</i> | miR-4283                                     | 2 |
| <i>circSLC8A3</i> | miR-4284                                     | 1 |
| <i>circSLC8A3</i> | miR-4289                                     | 2 |
| <i>circSLC8A3</i> | miR-4292/6791-5p                             | 3 |
| <i>circSLC8A3</i> | miR-4293                                     | 1 |
| <i>circSLC8A3</i> | miR-4297/5581-5p                             | 3 |
| <i>circSLC8A3</i> | miR-4299                                     | 7 |
| <i>circSLC8A3</i> | miR-4302                                     | 1 |
| <i>circSLC8A3</i> | miR-4308                                     | 3 |
| <i>circSLC8A3</i> | miR-4310/7157-5p                             | 1 |
| <i>circSLC8A3</i> | miR-4314                                     | 1 |
| <i>circSLC8A3</i> | miR-4316                                     | 2 |
| <i>circSLC8A3</i> | miR-4317                                     | 2 |
| <i>circSLC8A3</i> | miR-4318                                     | 1 |
| <i>circSLC8A3</i> | miR-432-3p                                   | 3 |
| <i>circSLC8A3</i> | miR-432-5p                                   | 2 |
| <i>circSLC8A3</i> | miR-4320                                     | 1 |
| <i>circSLC8A3</i> | miR-4324                                     | 2 |
| <i>circSLC8A3</i> | miR-4326                                     | 2 |
| <i>circSLC8A3</i> | miR-4329                                     | 1 |
| <i>circSLC8A3</i> | miR-433-5p                                   | 1 |
| <i>circSLC8A3</i> | miR-4417                                     | 1 |
| <i>circSLC8A3</i> | miR-4419a/4510/6127/6129/6130/6133           | 1 |
| <i>circSLC8A3</i> | miR-4427                                     | 1 |
| <i>circSLC8A3</i> | miR-4428                                     | 2 |
| <i>circSLC8A3</i> | miR-4433a-3p                                 | 2 |
| <i>circSLC8A3</i> | miR-4433b-3p                                 | 1 |
| <i>circSLC8A3</i> | miR-4434/4516/5703                           | 3 |
| <i>circSLC8A3</i> | miR-4435                                     | 2 |
| <i>circSLC8A3</i> | miR-4436b-3p/4632-5p/6735-5p/6879-5p/7843-5p | 3 |
| <i>circSLC8A3</i> | miR-4443                                     | 1 |
| <i>circSLC8A3</i> | miR-4446-5p                                  | 1 |
| <i>circSLC8A3</i> | miR-4447/4472                                | 1 |
| <i>circSLC8A3</i> | miR-4448                                     | 1 |

|                   |                  |   |
|-------------------|------------------|---|
| <i>circSLC8A3</i> | miR-4449         | 1 |
| <i>circSLC8A3</i> | miR-4450         | 1 |
| <i>circSLC8A3</i> | miR-4452         | 1 |
| <i>circSLC8A3</i> | miR-4454         | 1 |
| <i>circSLC8A3</i> | miR-4455         | 2 |
| <i>circSLC8A3</i> | miR-4456         | 7 |
| <i>circSLC8A3</i> | miR-4459         | 2 |
| <i>circSLC8A3</i> | miR-4461         | 2 |
| <i>circSLC8A3</i> | miR-4464/4748    | 1 |
| <i>circSLC8A3</i> | miR-4468         | 2 |
| <i>circSLC8A3</i> | miR-4471/8059    | 1 |
| <i>circSLC8A3</i> | miR-4474-3p      | 2 |
| <i>circSLC8A3</i> | miR-4475         | 2 |
| <i>circSLC8A3</i> | miR-4476/6876-5p | 1 |
| <i>circSLC8A3</i> | miR-4477b        | 1 |
| <i>circSLC8A3</i> | miR-4480         | 3 |
| <i>circSLC8A3</i> | miR-4489         | 2 |
| <i>circSLC8A3</i> | miR-4490         | 1 |
| <i>circSLC8A3</i> | miR-4491/4657    | 1 |
| <i>circSLC8A3</i> | miR-4493         | 2 |
| <i>circSLC8A3</i> | miR-4496         | 1 |
| <i>circSLC8A3</i> | miR-4501         | 1 |
| <i>circSLC8A3</i> | miR-4504         | 1 |
| <i>circSLC8A3</i> | miR-4505/5787    | 2 |
| <i>circSLC8A3</i> | miR-450a-1-3p    | 1 |
| <i>circSLC8A3</i> | miR-450a-2-3p    | 2 |
| <i>circSLC8A3</i> | miR-4514/4692    | 2 |
| <i>circSLC8A3</i> | miR-4515         | 1 |
| <i>circSLC8A3</i> | miR-4521         | 1 |
| <i>circSLC8A3</i> | miR-4523         | 1 |
| <i>circSLC8A3</i> | miR-4524a-3p     | 2 |
| <i>circSLC8A3</i> | miR-4524b-3p     | 1 |
| <i>circSLC8A3</i> | miR-4527/6503-5p | 1 |
| <i>circSLC8A3</i> | miR-4530         | 3 |
| <i>circSLC8A3</i> | miR-4531         | 3 |
| <i>circSLC8A3</i> | miR-4532         | 1 |
| <i>circSLC8A3</i> | miR-4533         | 3 |
| <i>circSLC8A3</i> | miR-4534/8082    | 1 |

|                   |                       |   |
|-------------------|-----------------------|---|
| <i>circSLC8A3</i> | miR-4537              | 1 |
| <i>circSLC8A3</i> | miR-4636              | 1 |
| <i>circSLC8A3</i> | miR-4639-3p           | 1 |
| <i>circSLC8A3</i> | miR-4642              | 2 |
| <i>circSLC8A3</i> | miR-4643              | 1 |
| <i>circSLC8A3</i> | miR-4645-3p           | 2 |
| <i>circSLC8A3</i> | miR-4649-3p           | 1 |
| <i>circSLC8A3</i> | miR-4652-5p           | 2 |
| <i>circSLC8A3</i> | miR-4653-3p           | 2 |
| <i>circSLC8A3</i> | miR-4656              | 4 |
| <i>circSLC8A3</i> | miR-4659a-3p/4659b-3p | 2 |
| <i>circSLC8A3</i> | miR-466               | 3 |
| <i>circSLC8A3</i> | miR-4661-3p           | 1 |
| <i>circSLC8A3</i> | miR-4666a-5p          | 2 |
| <i>circSLC8A3</i> | miR-4668-5p           | 1 |
| <i>circSLC8A3</i> | miR-4669              | 2 |
| <i>circSLC8A3</i> | miR-4674              | 1 |
| <i>circSLC8A3</i> | miR-4675/4741         | 4 |
| <i>circSLC8A3</i> | miR-4677-5p           | 1 |
| <i>circSLC8A3</i> | miR-4680-3p           | 1 |
| <i>circSLC8A3</i> | miR-4683              | 1 |
| <i>circSLC8A3</i> | miR-4684-3p           | 1 |
| <i>circSLC8A3</i> | miR-4685-5p/6837-5p   | 1 |
| <i>circSLC8A3</i> | miR-4687-3p           | 2 |
| <i>circSLC8A3</i> | miR-4688/6743-5p      | 1 |
| <i>circSLC8A3</i> | miR-4689/6858-5p      | 4 |
| <i>circSLC8A3</i> | miR-4691-3p           | 2 |
| <i>circSLC8A3</i> | miR-4691-5p/6792-3p   | 1 |
| <i>circSLC8A3</i> | miR-4693-3p           | 1 |
| <i>circSLC8A3</i> | miR-4694-5p           | 1 |
| <i>circSLC8A3</i> | miR-4695-5p           | 5 |
| <i>circSLC8A3</i> | miR-4696              | 1 |
| <i>circSLC8A3</i> | miR-4697-3p           | 1 |
| <i>circSLC8A3</i> | miR-4704-3p           | 1 |
| <i>circSLC8A3</i> | miR-4708-3p           | 1 |
| <i>circSLC8A3</i> | miR-4708-5p           | 3 |
| <i>circSLC8A3</i> | miR-4709-3p           | 2 |
| <i>circSLC8A3</i> | miR-4709-5p           | 2 |

|                   |                                  |   |
|-------------------|----------------------------------|---|
| <i>circSLC8A3</i> | miR-4710                         | 2 |
| <i>circSLC8A3</i> | miR-4711-3p                      | 1 |
| <i>circSLC8A3</i> | miR-4713-5p                      | 1 |
| <i>circSLC8A3</i> | miR-4714-3p                      | 1 |
| <i>circSLC8A3</i> | miR-4715-5p                      | 1 |
| <i>circSLC8A3</i> | miR-4716-3p/6794-5p              | 1 |
| <i>circSLC8A3</i> | miR-4716-5p                      | 2 |
| <i>circSLC8A3</i> | miR-4718                         | 1 |
| <i>circSLC8A3</i> | miR-4719                         | 1 |
| <i>circSLC8A3</i> | miR-4720-5p/4799-3p/5588-5p      | 1 |
| <i>circSLC8A3</i> | miR-4721                         | 1 |
| <i>circSLC8A3</i> | miR-4722-3p/6727-3p              | 1 |
| <i>circSLC8A3</i> | miR-4723-5p/5698/6870-5p/7111-5p | 1 |
| <i>circSLC8A3</i> | miR-4724-3p                      | 1 |
| <i>circSLC8A3</i> | miR-4725-5p                      | 1 |
| <i>circSLC8A3</i> | miR-4727-5p                      | 2 |
| <i>circSLC8A3</i> | miR-4730                         | 1 |
| <i>circSLC8A3</i> | miR-4732-3p                      | 1 |
| <i>circSLC8A3</i> | miR-4733-5p                      | 1 |
| <i>circSLC8A3</i> | miR-4734                         | 1 |
| <i>circSLC8A3</i> | miR-4738-3p                      | 1 |
| <i>circSLC8A3</i> | miR-4739                         | 2 |
| <i>circSLC8A3</i> | miR-4740-5p                      | 1 |
| <i>circSLC8A3</i> | miR-4742-5p                      | 2 |
| <i>circSLC8A3</i> | miR-4746-3p                      | 1 |
| <i>circSLC8A3</i> | miR-4747-5p/5196-5p              | 2 |
| <i>circSLC8A3</i> | miR-4749-3p                      | 1 |
| <i>circSLC8A3</i> | miR-4750-3p                      | 2 |
| <i>circSLC8A3</i> | miR-4750-5p                      | 1 |
| <i>circSLC8A3</i> | miR-4751                         | 3 |
| <i>circSLC8A3</i> | miR-4752                         | 1 |
| <i>circSLC8A3</i> | miR-4753-3p                      | 2 |
| <i>circSLC8A3</i> | miR-4753-5p                      | 2 |
| <i>circSLC8A3</i> | miR-4754                         | 1 |
| <i>circSLC8A3</i> | miR-4755-3p                      | 2 |
| <i>circSLC8A3</i> | miR-4755-5p/5006-3p              | 2 |
| <i>circSLC8A3</i> | miR-4756-3p                      | 2 |
| <i>circSLC8A3</i> | miR-4757-3p                      | 1 |

|                   |                     |   |
|-------------------|---------------------|---|
| <i>circSLC8A3</i> | miR-4757-5p/6744-3p | 2 |
| <i>circSLC8A3</i> | miR-4759            | 3 |
| <i>circSLC8A3</i> | miR-4760-3p         | 1 |
| <i>circSLC8A3</i> | miR-4760-5p/8061    | 1 |
| <i>circSLC8A3</i> | miR-4761-3p         | 3 |
| <i>circSLC8A3</i> | miR-4761-5p         | 2 |
| <i>circSLC8A3</i> | miR-4762-3p         | 1 |
| <i>circSLC8A3</i> | miR-4768-3p         | 2 |
| <i>circSLC8A3</i> | miR-4769-3p/6817-5p | 2 |
| <i>circSLC8A3</i> | miR-4772-3p         | 2 |
| <i>circSLC8A3</i> | miR-4772-5p         | 1 |
| <i>circSLC8A3</i> | miR-4773            | 2 |
| <i>circSLC8A3</i> | miR-4774-3p         | 2 |
| <i>circSLC8A3</i> | miR-4774-5p         | 1 |
| <i>circSLC8A3</i> | miR-4776-3p         | 1 |
| <i>circSLC8A3</i> | miR-4777-5p         | 1 |
| <i>circSLC8A3</i> | miR-4778-3p         | 5 |
| <i>circSLC8A3</i> | miR-4778-5p         | 1 |
| <i>circSLC8A3</i> | miR-4779            | 5 |
| <i>circSLC8A3</i> | miR-4780            | 3 |
| <i>circSLC8A3</i> | miR-4782-5p/5706    | 1 |
| <i>circSLC8A3</i> | miR-4786-3p         | 2 |
| <i>circSLC8A3</i> | miR-4786-5p         | 1 |
| <i>circSLC8A3</i> | miR-4789-3p         | 1 |
| <i>circSLC8A3</i> | miR-4789-5p         | 1 |
| <i>circSLC8A3</i> | miR-4790-3p         | 1 |
| <i>circSLC8A3</i> | miR-4792            | 2 |
| <i>circSLC8A3</i> | miR-4793-5p         | 1 |
| <i>circSLC8A3</i> | miR-4795-5p         | 1 |
| <i>circSLC8A3</i> | miR-4796-3p         | 1 |
| <i>circSLC8A3</i> | miR-4796-5p         | 1 |
| <i>circSLC8A3</i> | miR-4797-5p         | 3 |
| <i>circSLC8A3</i> | miR-4800-5p         | 1 |
| <i>circSLC8A3</i> | miR-4802-5p         | 2 |
| <i>circSLC8A3</i> | miR-483-3p.1        | 2 |
| <i>circSLC8A3</i> | miR-483-5p          | 1 |
| <i>circSLC8A3</i> | miR-485-5p          | 1 |
| <i>circSLC8A3</i> | miR-487a-5p/487b-5p | 2 |



|                   |                          |   |
|-------------------|--------------------------|---|
| <i>circSLC8A3</i> | miR-490-3p               | 2 |
| <i>circSLC8A3</i> | miR-491-5p               | 1 |
| <i>circSLC8A3</i> | miR-492                  | 1 |
| <i>circSLC8A3</i> | miR-494-3p               | 1 |
| <i>circSLC8A3</i> | miR-496.1                | 2 |
| <i>circSLC8A3</i> | miR-4999-5p              | 1 |
| <i>circSLC8A3</i> | miR-499a-3p/499b-3p      | 1 |
| <i>circSLC8A3</i> | miR-5000-5p              | 1 |
| <i>circSLC8A3</i> | miR-5001-3p              | 2 |
| <i>circSLC8A3</i> | miR-5002-3p              | 2 |
| <i>circSLC8A3</i> | miR-5003-3p              | 1 |
| <i>circSLC8A3</i> | miR-5003-5p              | 1 |
| <i>circSLC8A3</i> | miR-5004-3p              | 1 |
| <i>circSLC8A3</i> | miR-5004-5p              | 3 |
| <i>circSLC8A3</i> | miR-5006-5p              | 1 |
| <i>circSLC8A3</i> | miR-5009-5p/8058         | 1 |
| <i>circSLC8A3</i> | miR-500b-3p              | 1 |
| <i>circSLC8A3</i> | miR-501-3p/502-3p        | 1 |
| <i>circSLC8A3</i> | miR-5010-3p              | 2 |
| <i>circSLC8A3</i> | miR-5010-5p              | 1 |
| <i>circSLC8A3</i> | miR-502-5p               | 1 |
| <i>circSLC8A3</i> | miR-503-5p               | 1 |
| <i>circSLC8A3</i> | miR-504-3p               | 1 |
| <i>circSLC8A3</i> | miR-505-3p.2             | 2 |
| <i>circSLC8A3</i> | miR-5087                 | 1 |
| <i>circSLC8A3</i> | miR-5088-3p              | 1 |
| <i>circSLC8A3</i> | miR-509-3-5p/509-5p/4418 | 1 |
| <i>circSLC8A3</i> | miR-5091                 | 2 |
| <i>circSLC8A3</i> | miR-513a-5p              | 1 |
| <i>circSLC8A3</i> | miR-513b-3p              | 1 |
| <i>circSLC8A3</i> | miR-513c-5p/514b-5p      | 2 |
| <i>circSLC8A3</i> | miR-515-5p/519e-5p       | 1 |
| <i>circSLC8A3</i> | miR-516b-5p              | 1 |
| <i>circSLC8A3</i> | miR-5187-3p              | 1 |
| <i>circSLC8A3</i> | miR-5187-5p              | 1 |
| <i>circSLC8A3</i> | miR-5188                 | 1 |
| <i>circSLC8A3</i> | miR-518c-5p              | 1 |
| <i>circSLC8A3</i> | miR-518d-5p/519-5p       | 1 |

|                   |                                                                   |   |
|-------------------|-------------------------------------------------------------------|---|
| <i>circSLC8A3</i> | miR-5190                                                          | 1 |
| <i>circSLC8A3</i> | miR-5192                                                          | 2 |
| <i>circSLC8A3</i> | miR-5193                                                          | 1 |
| <i>circSLC8A3</i> | miR-5194                                                          | 1 |
| <i>circSLC8A3</i> | miR-5196-3p                                                       | 1 |
| <i>circSLC8A3</i> | miR-5197-3p                                                       | 1 |
| <i>circSLC8A3</i> | miR-519d-5p                                                       | 1 |
| <i>circSLC8A3</i> | miR-524-5p                                                        | 2 |
| <i>circSLC8A3</i> | miR-532-5p                                                        | 1 |
| <i>circSLC8A3</i> | miR-539-5p                                                        | 1 |
| <i>circSLC8A3</i> | miR-542-3p                                                        | 1 |
| <i>circSLC8A3</i> | miR-544a                                                          | 2 |
| <i>circSLC8A3</i> | miR-544b                                                          | 2 |
| <i>circSLC8A3</i> | miR-545-3p                                                        | 2 |
| <i>circSLC8A3</i> | miR-548ac/548bb-3p/548d-3p/548h-3p/548z                           |   |
| <i>circSLC8A3</i> | miR-548aj-5p/548f-5p/548g-5p/548x-5p                              | 1 |
| <i>circSLC8A3</i> | miR-548ao-3p                                                      | 1 |
| <i>circSLC8A3</i> | miR-548aq-3p/548am-3p/548aj-3p/548ah1-3p/548ae-3p/548j-3p/548x-3p |   |
| <i>circSLC8A3</i> | miR-548au-3p                                                      | 1 |
| <i>circSLC8A3</i> | miR-548av-3p                                                      | 1 |
| <i>circSLC8A3</i> | miR-548av-5p/548k/8054                                            | 1 |
| <i>circSLC8A3</i> | miR-548ay-5p/548au-5p/548as-5p/548ar-5p/548aq-5p/548ap-5p/548am-  |   |
| <i>circSLC8A3</i> | miR-548az-5p/548t-5p                                              | 1 |
| <i>circSLC8A3</i> | miR-548g-3p                                                       | 2 |
| <i>circSLC8A3</i> | miR-548l                                                          | 1 |
| <i>circSLC8A3</i> | miR-548n                                                          | 1 |
| <i>circSLC8A3</i> | miR-548p                                                          | 1 |
| <i>circSLC8A3</i> | miR-548q                                                          | 7 |
| <i>circSLC8A3</i> | miR-548s                                                          | 2 |
| <i>circSLC8A3</i> | miR-548u/7161-5p                                                  | 1 |
| <i>circSLC8A3</i> | miR-549a                                                          | 1 |
| <i>circSLC8A3</i> | miR-550a-3-5p/550a-5p/1271-3p                                     | 2 |
| <i>circSLC8A3</i> | miR-556-5p                                                        | 2 |
| <i>circSLC8A3</i> | miR-5571-3p                                                       | 1 |
| <i>circSLC8A3</i> | miR-5572                                                          | 2 |
| <i>circSLC8A3</i> | miR-5580-3p                                                       | 1 |
| <i>circSLC8A3</i> | miR-5584-3p                                                       | 1 |
| <i>circSLC8A3</i> | miR-5584-5p                                                       | 1 |

|                   |                  |   |
|-------------------|------------------|---|
| <i>circSLC8A3</i> | miR-5587-5p      | 1 |
| <i>circSLC8A3</i> | miR-5588-3p      | 1 |
| <i>circSLC8A3</i> | miR-561-5p       | 2 |
| <i>circSLC8A3</i> | miR-564          | 1 |
| <i>circSLC8A3</i> | miR-567          | 1 |
| <i>circSLC8A3</i> | miR-5681a        | 1 |
| <i>circSLC8A3</i> | miR-5691         | 3 |
| <i>circSLC8A3</i> | miR-5693         | 2 |
| <i>circSLC8A3</i> | miR-5694         | 2 |
| <i>circSLC8A3</i> | miR-5695         | 1 |
| <i>circSLC8A3</i> | miR-5700         | 1 |
| <i>circSLC8A3</i> | miR-5708         | 1 |
| <i>circSLC8A3</i> | miR-571          | 1 |
| <i>circSLC8A3</i> | miR-573/3616-5p  | 1 |
| <i>circSLC8A3</i> | miR-5739         | 2 |
| <i>circSLC8A3</i> | miR-575/4676-5p  | 3 |
| <i>circSLC8A3</i> | miR-577          | 1 |
| <i>circSLC8A3</i> | miR-580-5p       | 1 |
| <i>circSLC8A3</i> | miR-581          | 1 |
| <i>circSLC8A3</i> | miR-582-5p       | 1 |
| <i>circSLC8A3</i> | miR-588          | 2 |
| <i>circSLC8A3</i> | miR-589-3p       | 2 |
| <i>circSLC8A3</i> | miR-589-5p       | 2 |
| <i>circSLC8A3</i> | miR-591          | 2 |
| <i>circSLC8A3</i> | miR-592          | 1 |
| <i>circSLC8A3</i> | miR-593-3p       | 1 |
| <i>circSLC8A3</i> | miR-596          | 1 |
| <i>circSLC8A3</i> | miR-597-3p       | 3 |
| <i>circSLC8A3</i> | miR-597-5p       | 1 |
| <i>circSLC8A3</i> | miR-598-5p       | 1 |
| <i>circSLC8A3</i> | miR-599          | 1 |
| <i>circSLC8A3</i> | miR-605-3p       | 2 |
| <i>circSLC8A3</i> | miR-6071         | 1 |
| <i>circSLC8A3</i> | miR-6074         | 1 |
| <i>circSLC8A3</i> | miR-6076/6797-3p | 1 |
| <i>circSLC8A3</i> | miR-6079         | 1 |
| <i>circSLC8A3</i> | miR-608/4651     | 1 |
| <i>circSLC8A3</i> | miR-6081         | 1 |

|                   |                    |   |
|-------------------|--------------------|---|
| <i>circSLC8A3</i> | miR-6085/6813-5p   | 1 |
| <i>circSLC8A3</i> | miR-609            | 2 |
| <i>circSLC8A3</i> | miR-611/3131       | 1 |
| <i>circSLC8A3</i> | miR-6124           | 1 |
| <i>circSLC8A3</i> | miR-6128           | 2 |
| <i>circSLC8A3</i> | miR-6131           | 4 |
| <i>circSLC8A3</i> | miR-6132/6836-5p   | 1 |
| <i>circSLC8A3</i> | miR-6134           | 3 |
| <i>circSLC8A3</i> | miR-616-3p         | 1 |
| <i>circSLC8A3</i> | miR-619-3p         | 1 |
| <i>circSLC8A3</i> | miR-619-5p/6506-5p | 1 |
| <i>circSLC8A3</i> | miR-622            | 2 |
| <i>circSLC8A3</i> | miR-623            | 2 |
| <i>circSLC8A3</i> | miR-624-5p         | 1 |
| <i>circSLC8A3</i> | miR-625-5p         | 1 |
| <i>circSLC8A3</i> | miR-626/6876-3p    | 1 |
| <i>circSLC8A3</i> | miR-627-5p         | 2 |
| <i>circSLC8A3</i> | miR-628-5p         | 1 |
| <i>circSLC8A3</i> | miR-629-3p         | 2 |
| <i>circSLC8A3</i> | miR-634            | 1 |
| <i>circSLC8A3</i> | miR-635/6774-5p    | 2 |
| <i>circSLC8A3</i> | miR-640            | 2 |
| <i>circSLC8A3</i> | miR-641/3617-5p    | 1 |
| <i>circSLC8A3</i> | miR-642-3p         | 1 |
| <i>circSLC8A3</i> | miR-644a           | 3 |
| <i>circSLC8A3</i> | miR-646            | 1 |
| <i>circSLC8A3</i> | miR-648            | 1 |
| <i>circSLC8A3</i> | miR-649            | 2 |
| <i>circSLC8A3</i> | miR-6502-3p        | 1 |
| <i>circSLC8A3</i> | miR-6503-3p        | 1 |
| <i>circSLC8A3</i> | miR-6505-5p        | 2 |
| <i>circSLC8A3</i> | miR-6506-3p        | 1 |
| <i>circSLC8A3</i> | miR-651-3p         | 1 |
| <i>circSLC8A3</i> | miR-651-5p         | 1 |
| <i>circSLC8A3</i> | miR-6511-3p        | 1 |
| <i>circSLC8A3</i> | miR-6511-5p        | 3 |
| <i>circSLC8A3</i> | miR-6512-5p        | 1 |
| <i>circSLC8A3</i> | miR-6513-5p        | 1 |

|                   |                             |   |
|-------------------|-----------------------------|---|
| <i>circSLC8A3</i> | miR-6514-3p                 | 1 |
| <i>circSLC8A3</i> | miR-6514-5p                 | 2 |
| <i>circSLC8A3</i> | miR-6515-3p                 | 3 |
| <i>circSLC8A3</i> | miR-6515-5p                 | 1 |
| <i>circSLC8A3</i> | miR-6516-3p                 | 1 |
| <i>circSLC8A3</i> | miR-6516-5p                 | 1 |
| <i>circSLC8A3</i> | miR-652-3p                  | 1 |
| <i>circSLC8A3</i> | miR-653-5p                  | 1 |
| <i>circSLC8A3</i> | miR-656-5p                  | 1 |
| <i>circSLC8A3</i> | miR-659-5p                  | 1 |
| <i>circSLC8A3</i> | miR-660-3p                  | 1 |
| <i>circSLC8A3</i> | miR-660-5p                  | 1 |
| <i>circSLC8A3</i> | miR-661                     | 2 |
| <i>circSLC8A3</i> | miR-663b                    | 2 |
| <i>circSLC8A3</i> | miR-664a-3p                 | 1 |
| <i>circSLC8A3</i> | miR-664a-5p/4794            | 1 |
| <i>circSLC8A3</i> | miR-670-3p                  | 2 |
| <i>circSLC8A3</i> | miR-6719-3p                 | 1 |
| <i>circSLC8A3</i> | miR-6720-5p                 | 2 |
| <i>circSLC8A3</i> | miR-6721-5p                 | 1 |
| <i>circSLC8A3</i> | miR-6728-3p                 | 2 |
| <i>circSLC8A3</i> | miR-6730-3p                 | 1 |
| <i>circSLC8A3</i> | miR-6730-5p                 | 1 |
| <i>circSLC8A3</i> | miR-6731-3p                 | 2 |
| <i>circSLC8A3</i> | miR-6731-5p/8085            | 1 |
| <i>circSLC8A3</i> | miR-6732-3p                 | 1 |
| <i>circSLC8A3</i> | miR-6732-5p                 | 1 |
| <i>circSLC8A3</i> | miR-6733-3p                 | 1 |
| <i>circSLC8A3</i> | miR-6734-3p                 | 2 |
| <i>circSLC8A3</i> | miR-6735-3p                 | 1 |
| <i>circSLC8A3</i> | miR-6737-5p/6812-5p/6819-5p | 1 |
| <i>circSLC8A3</i> | miR-6738-3p                 | 2 |
| <i>circSLC8A3</i> | miR-6740-3p                 | 5 |
| <i>circSLC8A3</i> | miR-6740-5p                 | 1 |
| <i>circSLC8A3</i> | miR-6741-5p                 | 1 |
| <i>circSLC8A3</i> | miR-6742-3p                 | 2 |
| <i>circSLC8A3</i> | miR-6742-5p                 | 1 |
| <i>circSLC8A3</i> | miR-6744-5p                 | 3 |

|                   |                     |   |
|-------------------|---------------------|---|
| <i>circSLC8A3</i> | miR-6747-3p         | 1 |
| <i>circSLC8A3</i> | miR-6747-5p         | 1 |
| <i>circSLC8A3</i> | miR-6749-3p         | 1 |
| <i>circSLC8A3</i> | miR-675-3p          | 2 |
| <i>circSLC8A3</i> | miR-6750-5p/6822-5p | 1 |
| <i>circSLC8A3</i> | miR-6753-3p/7107-3p | 1 |
| <i>circSLC8A3</i> | miR-6756-5p/6766-5p | 2 |
| <i>circSLC8A3</i> | miR-6758-5p/6856-5p | 2 |
| <i>circSLC8A3</i> | miR-6759-3p         | 1 |
| <i>circSLC8A3</i> | miR-6759-5p         | 1 |
| <i>circSLC8A3</i> | miR-676-3p          | 2 |
| <i>circSLC8A3</i> | miR-676-5p          | 2 |
| <i>circSLC8A3</i> | miR-6760-5p         | 2 |
| <i>circSLC8A3</i> | miR-6761-5p         | 1 |
| <i>circSLC8A3</i> | miR-6764-3p/6824-3p | 1 |
| <i>circSLC8A3</i> | miR-6767-5p         | 1 |
| <i>circSLC8A3</i> | miR-6770-3p         | 1 |
| <i>circSLC8A3</i> | miR-6770-5p         | 1 |
| <i>circSLC8A3</i> | miR-6771-3p         | 1 |
| <i>circSLC8A3</i> | miR-6772-3p         | 1 |
| <i>circSLC8A3</i> | miR-6772-5p         | 2 |
| <i>circSLC8A3</i> | miR-6776-3p         | 1 |
| <i>circSLC8A3</i> | miR-6776-5p         | 2 |
| <i>circSLC8A3</i> | miR-6777-3p         | 1 |
| <i>circSLC8A3</i> | miR-6778-3p         | 4 |
| <i>circSLC8A3</i> | miR-6780a-3p        | 2 |
| <i>circSLC8A3</i> | miR-6780b-3p        | 3 |
| <i>circSLC8A3</i> | miR-6782-3p         | 1 |
| <i>circSLC8A3</i> | miR-6783-5p         | 2 |
| <i>circSLC8A3</i> | miR-6784-3p/6862-3p | 1 |
| <i>circSLC8A3</i> | miR-6784-5p         | 1 |
| <i>circSLC8A3</i> | miR-6786-5p         | 1 |
| <i>circSLC8A3</i> | miR-6791-3p/6829-3p | 4 |
| <i>circSLC8A3</i> | miR-6794-3p         | 1 |
| <i>circSLC8A3</i> | miR-6796-5p         | 1 |
| <i>circSLC8A3</i> | miR-6798-5p         | 2 |
| <i>circSLC8A3</i> | miR-6799-5p         | 1 |
| <i>circSLC8A3</i> | miR-6800-3p         | 2 |

|                   |                     |   |
|-------------------|---------------------|---|
| <i>circSLC8A3</i> | miR-6801-3p/6810-3p | 2 |
| <i>circSLC8A3</i> | miR-6804-5p         | 2 |
| <i>circSLC8A3</i> | miR-6805-5p         | 1 |
| <i>circSLC8A3</i> | miR-6807-5p         | 1 |
| <i>circSLC8A3</i> | miR-6810-5p         | 2 |
| <i>circSLC8A3</i> | miR-6814-3p/6872-5p | 1 |
| <i>circSLC8A3</i> | miR-6816-3p         | 1 |
| <i>circSLC8A3</i> | miR-6817-3p         | 2 |
| <i>circSLC8A3</i> | miR-6818-3p         | 1 |
| <i>circSLC8A3</i> | miR-6818-5p         | 3 |
| <i>circSLC8A3</i> | miR-6819-3p/6877-3p | 2 |
| <i>circSLC8A3</i> | miR-6822-3p         | 1 |
| <i>circSLC8A3</i> | miR-6823-5p         | 2 |
| <i>circSLC8A3</i> | miR-6825-5p         | 2 |
| <i>circSLC8A3</i> | miR-6826-3p         | 3 |
| <i>circSLC8A3</i> | miR-6826-5p         | 1 |
| <i>circSLC8A3</i> | miR-6827-5p         | 3 |
| <i>circSLC8A3</i> | miR-6828-3p         | 1 |
| <i>circSLC8A3</i> | miR-6829-5p         | 4 |
| <i>circSLC8A3</i> | miR-6830-5p         | 2 |
| <i>circSLC8A3</i> | miR-6832-3p         | 1 |
| <i>circSLC8A3</i> | miR-6833-5p         | 1 |
| <i>circSLC8A3</i> | miR-6834-3p         | 1 |
| <i>circSLC8A3</i> | miR-6836-3p         | 2 |
| <i>circSLC8A3</i> | miR-6837-3p         | 1 |
| <i>circSLC8A3</i> | miR-6838-3p         | 1 |
| <i>circSLC8A3</i> | miR-6839-3p         | 2 |
| <i>circSLC8A3</i> | miR-6841-3p         | 1 |
| <i>circSLC8A3</i> | miR-6843-3p/6848-3p | 1 |
| <i>circSLC8A3</i> | miR-6844            | 3 |
| <i>circSLC8A3</i> | miR-6847-5p         | 5 |
| <i>circSLC8A3</i> | miR-6850-5p         | 1 |
| <i>circSLC8A3</i> | miR-6851-3p         | 2 |
| <i>circSLC8A3</i> | miR-6852-5p         | 2 |
| <i>circSLC8A3</i> | miR-6853-3p         | 2 |
| <i>circSLC8A3</i> | miR-6853-5p         | 1 |
| <i>circSLC8A3</i> | miR-6856-3p         | 1 |
| <i>circSLC8A3</i> | miR-6857-5p         | 2 |

|                   |             |   |
|-------------------|-------------|---|
| <i>circSLC8A3</i> | miR-6858-3p | 3 |
| <i>circSLC8A3</i> | miR-6861-3p | 1 |
| <i>circSLC8A3</i> | miR-6861-5p | 2 |
| <i>circSLC8A3</i> | miR-6865-3p | 1 |
| <i>circSLC8A3</i> | miR-6866-5p | 1 |
| <i>circSLC8A3</i> | miR-6867-3p | 1 |
| <i>circSLC8A3</i> | miR-6867-5p | 3 |
| <i>circSLC8A3</i> | miR-6868-3p | 1 |
| <i>circSLC8A3</i> | miR-6868-5p | 1 |
| <i>circSLC8A3</i> | miR-6871-5p | 2 |
| <i>circSLC8A3</i> | miR-6872-3p | 1 |
| <i>circSLC8A3</i> | miR-6873-5p | 3 |
| <i>circSLC8A3</i> | miR-6875-3p | 2 |
| <i>circSLC8A3</i> | miR-6878-3p | 2 |
| <i>circSLC8A3</i> | miR-6878-5p | 1 |
| <i>circSLC8A3</i> | miR-6880-5p | 1 |
| <i>circSLC8A3</i> | miR-6881-3p | 2 |
| <i>circSLC8A3</i> | miR-6881-5p | 1 |
| <i>circSLC8A3</i> | miR-6884-3p | 1 |
| <i>circSLC8A3</i> | miR-6886-5p | 1 |
| <i>circSLC8A3</i> | miR-6888-5p | 1 |
| <i>circSLC8A3</i> | miR-6890-5p | 1 |
| <i>circSLC8A3</i> | miR-6892-5p | 1 |
| <i>circSLC8A3</i> | miR-6894-3p | 1 |
| <i>circSLC8A3</i> | miR-6894-5p | 3 |
| <i>circSLC8A3</i> | miR-6895-3p | 1 |
| <i>circSLC8A3</i> | miR-7-3p    | 1 |
| <i>circSLC8A3</i> | miR-7106-5p | 1 |
| <i>circSLC8A3</i> | miR-7108-5p | 2 |
| <i>circSLC8A3</i> | miR-7110-3p | 2 |
| <i>circSLC8A3</i> | miR-7111-3p | 2 |
| <i>circSLC8A3</i> | miR-7113-5p | 1 |
| <i>circSLC8A3</i> | miR-7114-5p | 1 |
| <i>circSLC8A3</i> | miR-7150    | 2 |
| <i>circSLC8A3</i> | miR-7152-5p | 1 |
| <i>circSLC8A3</i> | miR-7153-3p | 2 |
| <i>circSLC8A3</i> | miR-7154-3p | 3 |
| <i>circSLC8A3</i> | miR-7156-3p | 3 |



|                   |                           |   |
|-------------------|---------------------------|---|
| <i>circSLC8A3</i> | miR-7159-5p               | 2 |
| <i>circSLC8A3</i> | miR-7162-3p               | 1 |
| <i>circSLC8A3</i> | miR-7515                  | 2 |
| <i>circSLC8A3</i> | miR-758-5p                | 1 |
| <i>circSLC8A3</i> | miR-760                   | 1 |
| <i>circSLC8A3</i> | miR-762/4492/4498/5001-5p | 4 |
| <i>circSLC8A3</i> | miR-764                   | 1 |
| <i>circSLC8A3</i> | miR-7641                  | 1 |
| <i>circSLC8A3</i> | miR-765                   | 3 |
| <i>circSLC8A3</i> | miR-766-3p                | 2 |
| <i>circSLC8A3</i> | miR-766-5p                | 3 |
| <i>circSLC8A3</i> | miR-767-3p                | 2 |
| <i>circSLC8A3</i> | miR-769-5p                | 1 |
| <i>circSLC8A3</i> | miR-7843-3p               | 2 |
| <i>circSLC8A3</i> | miR-7845-5p               | 1 |
| <i>circSLC8A3</i> | miR-7847-3p               | 1 |
| <i>circSLC8A3</i> | miR-7849-3p               | 1 |
| <i>circSLC8A3</i> | miR-7851-3p               | 1 |
| <i>circSLC8A3</i> | miR-7854-3p               | 3 |
| <i>circSLC8A3</i> | miR-7855-5p               | 2 |
| <i>circSLC8A3</i> | miR-7973                  | 1 |
| <i>circSLC8A3</i> | miR-7974                  | 2 |
| <i>circSLC8A3</i> | miR-7975                  | 1 |
| <i>circSLC8A3</i> | miR-7976                  | 2 |
| <i>circSLC8A3</i> | miR-7977                  | 1 |
| <i>circSLC8A3</i> | miR-7978                  | 7 |
| <i>circSLC8A3</i> | miR-8055                  | 1 |
| <i>circSLC8A3</i> | miR-8056                  | 1 |
| <i>circSLC8A3</i> | miR-8057                  | 2 |
| <i>circSLC8A3</i> | miR-8064                  | 1 |
| <i>circSLC8A3</i> | miR-8066                  | 1 |
| <i>circSLC8A3</i> | miR-8069                  | 1 |
| <i>circSLC8A3</i> | miR-8070                  | 1 |
| <i>circSLC8A3</i> | miR-8071                  | 1 |
| <i>circSLC8A3</i> | miR-8074                  | 2 |
| <i>circSLC8A3</i> | miR-8076                  | 1 |
| <i>circSLC8A3</i> | miR-8080                  | 1 |
| <i>circSLC8A3</i> | miR-8083                  | 3 |

|                    |                                       |   |
|--------------------|---------------------------------------|---|
| <i>circSLC8A3</i>  | miR-873-3p                            | 1 |
| <i>circSLC8A3</i>  | miR-876-3p                            | 1 |
| <i>circSLC8A3</i>  | miR-877-5p                            | 1 |
| <i>circSLC8A3</i>  | miR-887-5p                            | 1 |
| <i>circSLC8A3</i>  | miR-891a-3p                           | 1 |
| <i>circSLC8A3</i>  | miR-892a                              | 1 |
| <i>circSLC8A3</i>  | miR-922                               | 1 |
| <i>circSLC8A3</i>  | miR-924                               | 1 |
| <i>circSLC8A3</i>  | miR-92b-5p                            | 1 |
| <i>circSLC8A3</i>  | miR-934                               | 1 |
| <i>circSLC8A3</i>  | miR-936                               | 1 |
| <i>circSLC8A3</i>  | miR-937-5p                            | 2 |
| <i>circSLC8A3</i>  | miR-939-3p                            | 2 |
| <i>circSLC8A3</i>  | miR-939-5p/1343-5p                    | 2 |
| <i>circSLC8A3</i>  | miR-941                               | 1 |
| <i>circSLC8A3</i>  | miR-943                               | 1 |
| <i>circSLC8A3</i>  | miR-944                               | 1 |
| <i>circSLC8A3</i>  | miR-9500                              | 1 |
| <i>circSLC8A3</i>  | miR-96-5p/1271-5p                     | 1 |
| <i>circSLCO1A2</i> | let-7a-2-3p/let-7g-3p                 | 3 |
| <i>circSLCO1A2</i> | let-7a-3p/let-7b-3p/let-7f-1-3p/98-3p | 1 |
| <i>circSLCO1A2</i> | let-7c-3p                             | 3 |
| <i>circSLCO1A2</i> | let-7f-2-3p/1185-3p                   | 1 |
| <i>circSLCO1A2</i> | miR-1-3p/206                          | 1 |
| <i>circSLCO1A2</i> | miR-1-5p                              | 1 |
| <i>circSLCO1A2</i> | miR-100-3p                            | 4 |
| <i>circSLCO1A2</i> | miR-101-3p.2                          | 5 |
| <i>circSLCO1A2</i> | miR-105-5p                            | 4 |
| <i>circSLCO1A2</i> | miR-106a-3p                           | 4 |
| <i>circSLCO1A2</i> | miR-106b-3p                           | 1 |
| <i>circSLCO1A2</i> | miR-1178-3p                           | 2 |
| <i>circSLCO1A2</i> | miR-1179                              | 1 |
| <i>circSLCO1A2</i> | miR-1184                              | 1 |
| <i>circSLCO1A2</i> | miR-1193                              | 2 |
| <i>circSLCO1A2</i> | miR-1205                              | 1 |
| <i>circSLCO1A2</i> | miR-1206                              | 2 |
| <i>circSLCO1A2</i> | miR-1207-3p                           | 1 |
| <i>circSLCO1A2</i> | miR-1208                              | 1 |

|                    |                          |   |
|--------------------|--------------------------|---|
| <i>circSLCO1A2</i> | miR-122-5p               | 1 |
| <i>circSLCO1A2</i> | miR-1225-5p              | 1 |
| <i>circSLCO1A2</i> | miR-1229-5p              | 1 |
| <i>circSLCO1A2</i> | miR-1236-3p              | 1 |
| <i>circSLCO1A2</i> | miR-1236-5p              | 1 |
| <i>circSLCO1A2</i> | miR-1238-3p              | 1 |
| <i>circSLCO1A2</i> | miR-1238-5p/4758-5p      | 1 |
| <i>circSLCO1A2</i> | miR-1243                 | 2 |
| <i>circSLCO1A2</i> | miR-1245a/8079           | 1 |
| <i>circSLCO1A2</i> | miR-1245b-3p             | 1 |
| <i>circSLCO1A2</i> | miR-1246                 | 3 |
| <i>circSLCO1A2</i> | miR-1247-3p              | 1 |
| <i>circSLCO1A2</i> | miR-1250-3p              | 1 |
| <i>circSLCO1A2</i> | miR-1250-5p              | 1 |
| <i>circSLCO1A2</i> | miR-1251-5p              | 1 |
| <i>circSLCO1A2</i> | miR-1252-3p              | 5 |
| <i>circSLCO1A2</i> | miR-1252-5p              | 4 |
| <i>circSLCO1A2</i> | miR-1255a/1255b-5p       | 2 |
| <i>circSLCO1A2</i> | miR-1256                 | 1 |
| <i>circSLCO1A2</i> | miR-1257                 | 1 |
| <i>circSLCO1A2</i> | miR-126-5p               | 3 |
| <i>circSLCO1A2</i> | miR-1260a/1260b          | 1 |
| <i>circSLCO1A2</i> | miR-1261                 | 3 |
| <i>circSLCO1A2</i> | miR-1262/4701-3p/6736-5p | 4 |
| <i>circSLCO1A2</i> | miR-1264                 | 1 |
| <i>circSLCO1A2</i> | miR-1265                 | 2 |
| <i>circSLCO1A2</i> | miR-1268a/1268b          | 1 |
| <i>circSLCO1A2</i> | miR-1269                 | 1 |
| <i>circSLCO1A2</i> | miR-1272                 | 1 |
| <i>circSLCO1A2</i> | miR-1273c                | 1 |
| <i>circSLCO1A2</i> | miR-1273d                | 1 |
| <i>circSLCO1A2</i> | miR-1273e                | 1 |
| <i>circSLCO1A2</i> | miR-1273f                | 1 |
| <i>circSLCO1A2</i> | miR-1273g-3p             | 1 |
| <i>circSLCO1A2</i> | miR-1273g-5p             | 3 |
| <i>circSLCO1A2</i> | miR-1277-5p              | 2 |
| <i>circSLCO1A2</i> | miR-1278                 | 1 |
| <i>circSLCO1A2</i> | miR-1279                 | 2 |

|                    |                     |   |
|--------------------|---------------------|---|
| <i>circSLCO1A2</i> | miR-1286            | 1 |
| <i>circSLCO1A2</i> | miR-1288-5p         | 1 |
| <i>circSLCO1A2</i> | miR-129-5p          | 1 |
| <i>circSLCO1A2</i> | miR-1290            | 3 |
| <i>circSLCO1A2</i> | miR-1292-5p         | 1 |
| <i>circSLCO1A2</i> | miR-1295b-5p/1912   | 1 |
| <i>circSLCO1A2</i> | miR-1296-5p         | 1 |
| <i>circSLCO1A2</i> | miR-1298-3p         | 1 |
| <i>circSLCO1A2</i> | miR-1298-5p         | 1 |
| <i>circSLCO1A2</i> | miR-1299            | 1 |
| <i>circSLCO1A2</i> | miR-1301-3p         | 1 |
| <i>circSLCO1A2</i> | miR-1301-5p/6502-5p | 1 |
| <i>circSLCO1A2</i> | miR-1304-3p         | 1 |
| <i>circSLCO1A2</i> | miR-1305            | 5 |
| <i>circSLCO1A2</i> | miR-130b-5p         | 4 |
| <i>circSLCO1A2</i> | miR-132-3p/212-3p   | 3 |
| <i>circSLCO1A2</i> | miR-1322            | 1 |
| <i>circSLCO1A2</i> | miR-1324            | 1 |
| <i>circSLCO1A2</i> | miR-133a-3p.1       | 1 |
| <i>circSLCO1A2</i> | miR-133a-3p.2/133b  | 1 |
| <i>circSLCO1A2</i> | miR-133a-5p         | 2 |
| <i>circSLCO1A2</i> | miR-134-3p          | 3 |
| <i>circSLCO1A2</i> | miR-135-5p          | 2 |
| <i>circSLCO1A2</i> | miR-135b-3p         | 1 |
| <i>circSLCO1A2</i> | miR-136-5p          | 2 |
| <i>circSLCO1A2</i> | miR-137             | 2 |
| <i>circSLCO1A2</i> | miR-138-2-3p        | 4 |
| <i>circSLCO1A2</i> | miR-138-5p          | 2 |
| <i>circSLCO1A2</i> | miR-139-5p          | 3 |
| <i>circSLCO1A2</i> | miR-140-5p          | 3 |
| <i>circSLCO1A2</i> | miR-142-5p          | 1 |
| <i>circSLCO1A2</i> | miR-143-3p          | 1 |
| <i>circSLCO1A2</i> | miR-143-5p          | 2 |
| <i>circSLCO1A2</i> | miR-144-5p          | 1 |
| <i>circSLCO1A2</i> | miR-145-3p          | 2 |
| <i>circSLCO1A2</i> | miR-145-5p          | 1 |
| <i>circSLCO1A2</i> | miR-146a-3p         | 1 |
| <i>circSLCO1A2</i> | miR-147a            | 6 |

|                    |                                    |   |
|--------------------|------------------------------------|---|
| <i>circSLCO1A2</i> | miR-147b                           | 1 |
| <i>circSLCO1A2</i> | miR-148a-5p                        | 2 |
| <i>circSLCO1A2</i> | miR-148b-5p/6874-3p                | 1 |
| <i>circSLCO1A2</i> | miR-149-3p/4728-5p/6785-5p/6883-5p | 1 |
| <i>circSLCO1A2</i> | miR-150-5p                         | 3 |
| <i>circSLCO1A2</i> | miR-152-5p                         | 1 |
| <i>circSLCO1A2</i> | miR-153-5p                         | 5 |
| <i>circSLCO1A2</i> | miR-1537-5p                        | 1 |
| <i>circSLCO1A2</i> | miR-154-3p/487-3p                  | 3 |
| <i>circSLCO1A2</i> | miR-154-5p                         | 1 |
| <i>circSLCO1A2</i> | miR-155-5p                         | 2 |
| <i>circSLCO1A2</i> | miR-1587/3620-5p                   | 2 |
| <i>circSLCO1A2</i> | miR-15b-3p                         | 3 |
| <i>circSLCO1A2</i> | miR-16-1-3p                        | 1 |
| <i>circSLCO1A2</i> | miR-16-2-3p/195-3p                 | 5 |
| <i>circSLCO1A2</i> | miR-17-3p                          | 1 |
| <i>circSLCO1A2</i> | miR-181-3p/4420                    | 1 |
| <i>circSLCO1A2</i> | miR-182-3p                         | 1 |
| <i>circSLCO1A2</i> | miR-182-5p                         | 2 |
| <i>circSLCO1A2</i> | miR-183-3p                         | 1 |
| <i>circSLCO1A2</i> | miR-183-5p.1                       | 2 |
| <i>circSLCO1A2</i> | miR-185-3p                         | 1 |
| <i>circSLCO1A2</i> | miR-185-5p                         | 1 |
| <i>circSLCO1A2</i> | miR-186-5p                         | 5 |
| <i>circSLCO1A2</i> | miR-188-3p                         | 1 |
| <i>circSLCO1A2</i> | miR-18a-3p                         | 2 |
| <i>circSLCO1A2</i> | miR-19-3p                          | 1 |
| <i>circSLCO1A2</i> | miR-190-5p                         | 1 |
| <i>circSLCO1A2</i> | miR-190a-3p                        | 5 |
| <i>circSLCO1A2</i> | miR-1910-3p/6511a-5p               | 1 |
| <i>circSLCO1A2</i> | miR-1914-5p                        | 2 |
| <i>circSLCO1A2</i> | miR-192-3p                         | 1 |
| <i>circSLCO1A2</i> | miR-193b-5p                        | 1 |
| <i>circSLCO1A2</i> | miR-196a-3p                        | 2 |
| <i>circSLCO1A2</i> | miR-200ab-5p                       | 1 |
| <i>circSLCO1A2</i> | miR-202-5p                         | 2 |
| <i>circSLCO1A2</i> | miR-203a-3p.1                      | 2 |
| <i>circSLCO1A2</i> | miR-203a-5p                        | 3 |

|                    |                                     |   |
|--------------------|-------------------------------------|---|
| <i>circSLCO1A2</i> | miR-205-3p                          | 4 |
| <i>circSLCO1A2</i> | miR-205-5p                          | 1 |
| <i>circSLCO1A2</i> | miR-208-3p                          | 1 |
| <i>circSLCO1A2</i> | miR-20b-3p                          | 1 |
| <i>circSLCO1A2</i> | miR-210-3p                          | 1 |
| <i>circSLCO1A2</i> | miR-2110                            | 1 |
| <i>circSLCO1A2</i> | miR-2113                            | 3 |
| <i>circSLCO1A2</i> | miR-2115-3p                         | 1 |
| <i>circSLCO1A2</i> | miR-2116-3p                         | 3 |
| <i>circSLCO1A2</i> | miR-2116-5p                         | 1 |
| <i>circSLCO1A2</i> | miR-2117                            | 1 |
| <i>circSLCO1A2</i> | miR-215-3p                          | 5 |
| <i>circSLCO1A2</i> | miR-216a-5p                         | 1 |
| <i>circSLCO1A2</i> | miR-216b-5p                         | 1 |
| <i>circSLCO1A2</i> | miR-218-1-3p                        | 1 |
| <i>circSLCO1A2</i> | miR-218-2-3p                        | 1 |
| <i>circSLCO1A2</i> | miR-219-5p                          | 2 |
| <i>circSLCO1A2</i> | miR-219a-1-3p                       | 1 |
| <i>circSLCO1A2</i> | miR-22-3p                           | 2 |
| <i>circSLCO1A2</i> | miR-22-5p                           | 1 |
| <i>circSLCO1A2</i> | miR-223-5p                          | 6 |
| <i>circSLCO1A2</i> | miR-2276-3p                         | 1 |
| <i>circSLCO1A2</i> | miR-2355-3p                         | 2 |
| <i>circSLCO1A2</i> | miR-2355-5p                         | 1 |
| <i>circSLCO1A2</i> | miR-2392                            | 2 |
| <i>circSLCO1A2</i> | miR-24-5p                           | 2 |
| <i>circSLCO1A2</i> | miR-25-3p/32-5p/92-3p/363-3p/367-3p | 5 |
| <i>circSLCO1A2</i> | miR-26-3p                           | 1 |
| <i>circSLCO1A2</i> | miR-2681-5p                         | 3 |
| <i>circSLCO1A2</i> | miR-26b-3p                          | 1 |
| <i>circSLCO1A2</i> | miR-27-3p                           | 2 |
| <i>circSLCO1A2</i> | miR-27a-5p                          | 2 |
| <i>circSLCO1A2</i> | miR-27b-5p                          | 1 |
| <i>circSLCO1A2</i> | miR-28-3p                           | 1 |
| <i>circSLCO1A2</i> | miR-28-5p/708-5p                    | 1 |
| <i>circSLCO1A2</i> | miR-297                             | 3 |
| <i>circSLCO1A2</i> | miR-299-3p                          | 8 |
| <i>circSLCO1A2</i> | miR-299-5p                          | 3 |

|                    |                                              |   |
|--------------------|----------------------------------------------|---|
| <i>circSLCO1A2</i> | miR-29a-5p                                   | 2 |
| <i>circSLCO1A2</i> | miR-29b-1-5p                                 | 3 |
| <i>circSLCO1A2</i> | miR-29b-2-5p                                 | 3 |
| <i>circSLCO1A2</i> | miR-30-3p                                    | 6 |
| <i>circSLCO1A2</i> | miR-30-5p                                    | 1 |
| <i>circSLCO1A2</i> | miR-302-3p/372-3p/373-3p/520-3p              | 1 |
| <i>circSLCO1A2</i> | miR-302b-5p/302d-5p                          | 1 |
| <i>circSLCO1A2</i> | miR-302c-3p.2/520-3p                         | 1 |
| <i>circSLCO1A2</i> | miR-302c-5p                                  | 1 |
| <i>circSLCO1A2</i> | miR-302f                                     | 1 |
| <i>circSLCO1A2</i> | miR-3064-3p                                  | 1 |
| <i>circSLCO1A2</i> | miR-3064-5p                                  | 1 |
| <i>circSLCO1A2</i> | miR-3065-5p                                  | 1 |
| <i>circSLCO1A2</i> | miR-3074-3p                                  | 2 |
| <i>circSLCO1A2</i> | miR-3074-5p                                  | 2 |
| <i>circSLCO1A2</i> | miR-30b-3p/1273h-5p/3689-3p/6779-5p/6780a-5p |   |
| <i>circSLCO1A2</i> | miR-30c-3p/6788-5p                           | 1 |
| <i>circSLCO1A2</i> | miR-31-3p                                    | 3 |
| <i>circSLCO1A2</i> | miR-3115                                     | 2 |
| <i>circSLCO1A2</i> | miR-3117-5p                                  | 2 |
| <i>circSLCO1A2</i> | miR-3119                                     | 1 |
| <i>circSLCO1A2</i> | miR-3120-3p                                  | 1 |
| <i>circSLCO1A2</i> | miR-3120-5p                                  | 1 |
| <i>circSLCO1A2</i> | miR-3121-3p                                  | 1 |
| <i>circSLCO1A2</i> | miR-3121-5p                                  | 2 |
| <i>circSLCO1A2</i> | miR-3122/3913-5p                             | 1 |
| <i>circSLCO1A2</i> | miR-3123                                     | 1 |
| <i>circSLCO1A2</i> | miR-3124-3p                                  | 2 |
| <i>circSLCO1A2</i> | miR-3125/3916/6859-5p                        | 1 |
| <i>circSLCO1A2</i> | miR-3126-3p                                  | 1 |
| <i>circSLCO1A2</i> | miR-3129-3p/5583-5p                          | 2 |
| <i>circSLCO1A2</i> | miR-3130-5p/4482-5p                          | 1 |
| <i>circSLCO1A2</i> | miR-3133                                     | 5 |
| <i>circSLCO1A2</i> | miR-3136-5p/4439                             | 2 |
| <i>circSLCO1A2</i> | miR-3137                                     | 1 |
| <i>circSLCO1A2</i> | miR-3140-3p                                  | 2 |
| <i>circSLCO1A2</i> | miR-3141                                     | 1 |
| <i>circSLCO1A2</i> | miR-3143                                     | 1 |

|                    |                     |   |
|--------------------|---------------------|---|
| <i>circSLCO1A2</i> | miR-3144-3p         | 1 |
| <i>circSLCO1A2</i> | miR-3145-3p         | 1 |
| <i>circSLCO1A2</i> | miR-3145-5p         | 1 |
| <i>circSLCO1A2</i> | miR-3146            | 2 |
| <i>circSLCO1A2</i> | miR-3147            | 2 |
| <i>circSLCO1A2</i> | miR-3148            | 6 |
| <i>circSLCO1A2</i> | miR-3149            | 3 |
| <i>circSLCO1A2</i> | miR-3150a-3p        | 1 |
| <i>circSLCO1A2</i> | miR-3150b-3p        | 1 |
| <i>circSLCO1A2</i> | miR-3151-3p         | 1 |
| <i>circSLCO1A2</i> | miR-3152-5p         | 2 |
| <i>circSLCO1A2</i> | miR-3154            | 1 |
| <i>circSLCO1A2</i> | miR-3156-3p         | 1 |
| <i>circSLCO1A2</i> | miR-3158-3p         | 1 |
| <i>circSLCO1A2</i> | miR-3158-5p         | 1 |
| <i>circSLCO1A2</i> | miR-3159            | 2 |
| <i>circSLCO1A2</i> | miR-3160-5p         | 1 |
| <i>circSLCO1A2</i> | miR-3161            | 2 |
| <i>circSLCO1A2</i> | miR-3163            | 1 |
| <i>circSLCO1A2</i> | miR-3168            | 1 |
| <i>circSLCO1A2</i> | miR-3169            | 1 |
| <i>circSLCO1A2</i> | miR-3171            | 1 |
| <i>circSLCO1A2</i> | miR-3173-3p/6891-5p | 1 |
| <i>circSLCO1A2</i> | miR-3177-5p         | 4 |
| <i>circSLCO1A2</i> | miR-3179            | 1 |
| <i>circSLCO1A2</i> | miR-3182            | 1 |
| <i>circSLCO1A2</i> | miR-3184-3p         | 1 |
| <i>circSLCO1A2</i> | miR-3185            | 3 |
| <i>circSLCO1A2</i> | miR-3190-3p         | 5 |
| <i>circSLCO1A2</i> | miR-3192-3p         | 2 |
| <i>circSLCO1A2</i> | miR-3193            | 2 |
| <i>circSLCO1A2</i> | miR-3198/4309       | 1 |
| <i>circSLCO1A2</i> | miR-32-3p           | 1 |
| <i>circSLCO1A2</i> | miR-320             | 1 |
| <i>circSLCO1A2</i> | miR-3200-5p         | 1 |
| <i>circSLCO1A2</i> | miR-3201/4791       | 3 |
| <i>circSLCO1A2</i> | miR-3202            | 1 |
| <i>circSLCO1A2</i> | miR-320e            | 2 |



|                    |                           |   |
|--------------------|---------------------------|---|
| <i>circSLCO1A2</i> | miR-323-3p                | 2 |
| <i>circSLCO1A2</i> | miR-323a-5p               | 3 |
| <i>circSLCO1A2</i> | miR-323b-3p               | 2 |
| <i>circSLCO1A2</i> | miR-323b-5p/410-5p/494-5p | 3 |
| <i>circSLCO1A2</i> | miR-324-3p/1913           | 2 |
| <i>circSLCO1A2</i> | miR-325                   | 2 |
| <i>circSLCO1A2</i> | miR-329-3p/362-3p         | 1 |
| <i>circSLCO1A2</i> | miR-329-5p                | 1 |
| <i>circSLCO1A2</i> | miR-33-5p                 | 1 |
| <i>circSLCO1A2</i> | miR-330-3p                | 2 |
| <i>circSLCO1A2</i> | miR-330-3p.2              | 2 |
| <i>circSLCO1A2</i> | miR-335-3p                | 2 |
| <i>circSLCO1A2</i> | miR-337-3p                | 2 |
| <i>circSLCO1A2</i> | miR-33a-3p                | 3 |
| <i>circSLCO1A2</i> | miR-34-5p/449-5p          | 1 |
| <i>circSLCO1A2</i> | miR-345-5p                | 1 |
| <i>circSLCO1A2</i> | miR-34b-3p                | 2 |
| <i>circSLCO1A2</i> | miR-34b-5p/449c-5p        | 1 |
| <i>circSLCO1A2</i> | miR-34c-3p                | 2 |
| <i>circSLCO1A2</i> | miR-3606-5p               | 1 |
| <i>circSLCO1A2</i> | miR-3607-3p               | 1 |
| <i>circSLCO1A2</i> | miR-3607-5p               | 1 |
| <i>circSLCO1A2</i> | miR-361-5p                | 1 |
| <i>circSLCO1A2</i> | miR-3611                  | 4 |
| <i>circSLCO1A2</i> | miR-3613-3p               | 1 |
| <i>circSLCO1A2</i> | miR-3613-5p               | 1 |
| <i>circSLCO1A2</i> | miR-362-5p/500b-5p        | 2 |
| <i>circSLCO1A2</i> | miR-3620-3p               | 2 |
| <i>circSLCO1A2</i> | miR-3622a-3p/3622b-3p     | 1 |
| <i>circSLCO1A2</i> | miR-3646                  | 5 |
| <i>circSLCO1A2</i> | miR-3650                  | 1 |
| <i>circSLCO1A2</i> | miR-3654                  | 2 |
| <i>circSLCO1A2</i> | miR-3655                  | 7 |
| <i>circSLCO1A2</i> | miR-3658                  | 1 |
| <i>circSLCO1A2</i> | miR-3659                  | 1 |
| <i>circSLCO1A2</i> | miR-3660/4526             | 2 |
| <i>circSLCO1A2</i> | miR-3662                  | 9 |
| <i>circSLCO1A2</i> | miR-3663-5p               | 1 |

|                    |                                   |   |
|--------------------|-----------------------------------|---|
| <i>circSLCO1A2</i> | miR-3665                          | 1 |
| <i>circSLCO1A2</i> | miR-3667-5p                       | 1 |
| <i>circSLCO1A2</i> | miR-3671                          | 3 |
| <i>circSLCO1A2</i> | miR-3672/6864-3p                  | 3 |
| <i>circSLCO1A2</i> | miR-3674                          | 1 |
| <i>circSLCO1A2</i> | miR-3675-3p                       | 1 |
| <i>circSLCO1A2</i> | miR-3677-5p                       | 1 |
| <i>circSLCO1A2</i> | miR-3679-3p                       | 1 |
| <i>circSLCO1A2</i> | miR-3682-3p                       | 1 |
| <i>circSLCO1A2</i> | miR-3682-5p                       | 1 |
| <i>circSLCO1A2</i> | miR-3683                          | 1 |
| <i>circSLCO1A2</i> | miR-3685                          | 2 |
| <i>circSLCO1A2</i> | miR-3688-3p                       | 7 |
| <i>circSLCO1A2</i> | miR-3689a-5p/3689b-5p/3689e/3689f | 2 |
| <i>circSLCO1A2</i> | miR-369-3p                        | 1 |
| <i>circSLCO1A2</i> | miR-3690                          | 1 |
| <i>circSLCO1A2</i> | miR-3691-5p                       | 2 |
| <i>circSLCO1A2</i> | miR-3692-3p                       | 2 |
| <i>circSLCO1A2</i> | miR-371-5p                        | 2 |
| <i>circSLCO1A2</i> | miR-371b-5p/373-5p/616-5p         | 2 |
| <i>circSLCO1A2</i> | miR-372-5p                        | 2 |
| <i>circSLCO1A2</i> | miR-374-5p                        | 3 |
| <i>circSLCO1A2</i> | miR-374-5p/655-3p                 | 2 |
| <i>circSLCO1A2</i> | miR-374a-3p                       | 1 |
| <i>circSLCO1A2</i> | miR-375                           | 1 |
| <i>circSLCO1A2</i> | miR-376a-2-5p                     | 1 |
| <i>circSLCO1A2</i> | miR-376a-5p                       | 1 |
| <i>circSLCO1A2</i> | miR-376b-5p/376c-5p               | 3 |
| <i>circSLCO1A2</i> | miR-376c-3p                       | 2 |
| <i>circSLCO1A2</i> | miR-377-3p                        | 1 |
| <i>circSLCO1A2</i> | miR-377-5p/6086                   | 1 |
| <i>circSLCO1A2</i> | miR-378j/6839-5p                  | 2 |
| <i>circSLCO1A2</i> | miR-382-3p                        | 7 |
| <i>circSLCO1A2</i> | miR-383-5p.1                      | 1 |
| <i>circSLCO1A2</i> | miR-383-5p.2                      | 1 |
| <i>circSLCO1A2</i> | miR-384                           | 2 |
| <i>circSLCO1A2</i> | miR-3907                          | 1 |
| <i>circSLCO1A2</i> | miR-3908                          | 1 |

|                    |                    |   |
|--------------------|--------------------|---|
| <i>circSLCO1A2</i> | miR-3909           | 2 |
| <i>circSLCO1A2</i> | miR-3911           | 2 |
| <i>circSLCO1A2</i> | miR-3912-5p        | 2 |
| <i>circSLCO1A2</i> | miR-3913-3p        | 5 |
| <i>circSLCO1A2</i> | miR-3919           | 2 |
| <i>circSLCO1A2</i> | miR-3920           | 4 |
| <i>circSLCO1A2</i> | miR-3924           | 2 |
| <i>circSLCO1A2</i> | miR-3925-3p        | 1 |
| <i>circSLCO1A2</i> | miR-3925-5p        | 1 |
| <i>circSLCO1A2</i> | miR-3928-3p        | 1 |
| <i>circSLCO1A2</i> | miR-3938           | 1 |
| <i>circSLCO1A2</i> | miR-3940-5p/4507   | 1 |
| <i>circSLCO1A2</i> | miR-3942-3p        | 4 |
| <i>circSLCO1A2</i> | miR-3942-5p        | 1 |
| <i>circSLCO1A2</i> | miR-3944-5p        | 1 |
| <i>circSLCO1A2</i> | miR-3978           | 7 |
| <i>circSLCO1A2</i> | miR-409-3p         | 4 |
| <i>circSLCO1A2</i> | miR-410-3p         | 3 |
| <i>circSLCO1A2</i> | miR-411-3p         | 3 |
| <i>circSLCO1A2</i> | miR-411-5p.1       | 2 |
| <i>circSLCO1A2</i> | miR-411-5p.2       | 3 |
| <i>circSLCO1A2</i> | miR-421            | 1 |
| <i>circSLCO1A2</i> | miR-425-5p         | 2 |
| <i>circSLCO1A2</i> | miR-4251           | 1 |
| <i>circSLCO1A2</i> | miR-4254           | 1 |
| <i>circSLCO1A2</i> | miR-4261           | 2 |
| <i>circSLCO1A2</i> | miR-4263           | 2 |
| <i>circSLCO1A2</i> | miR-4265/4296/4322 | 3 |
| <i>circSLCO1A2</i> | miR-4269/6715b-5p  | 2 |
| <i>circSLCO1A2</i> | miR-4272           | 2 |
| <i>circSLCO1A2</i> | miR-4274           | 2 |
| <i>circSLCO1A2</i> | miR-4275           | 1 |
| <i>circSLCO1A2</i> | miR-4277           | 3 |
| <i>circSLCO1A2</i> | miR-4279           | 2 |
| <i>circSLCO1A2</i> | miR-4280           | 2 |
| <i>circSLCO1A2</i> | miR-4282           | 7 |
| <i>circSLCO1A2</i> | miR-4301           | 1 |
| <i>circSLCO1A2</i> | miR-4302           | 1 |

|                    |                  |   |
|--------------------|------------------|---|
| <i>circSLCO1A2</i> | miR-4303         | 1 |
| <i>circSLCO1A2</i> | miR-4307         | 5 |
| <i>circSLCO1A2</i> | miR-431-5p       | 3 |
| <i>circSLCO1A2</i> | miR-4314         | 1 |
| <i>circSLCO1A2</i> | miR-4318         | 1 |
| <i>circSLCO1A2</i> | miR-432-3p       | 2 |
| <i>circSLCO1A2</i> | miR-4325         | 1 |
| <i>circSLCO1A2</i> | miR-4326         | 1 |
| <i>circSLCO1A2</i> | miR-4328         | 8 |
| <i>circSLCO1A2</i> | miR-4329         | 1 |
| <i>circSLCO1A2</i> | miR-433-3p       | 4 |
| <i>circSLCO1A2</i> | miR-4421/5699-3p | 1 |
| <i>circSLCO1A2</i> | miR-4422         | 2 |
| <i>circSLCO1A2</i> | miR-4423-3p      | 2 |
| <i>circSLCO1A2</i> | miR-4424         | 2 |
| <i>circSLCO1A2</i> | miR-4425         | 2 |
| <i>circSLCO1A2</i> | miR-4427         | 1 |
| <i>circSLCO1A2</i> | miR-4428         | 1 |
| <i>circSLCO1A2</i> | miR-4433a-3p     | 2 |
| <i>circSLCO1A2</i> | miR-4433b-3p     | 2 |
| <i>circSLCO1A2</i> | miR-4436b-5p     | 1 |
| <i>circSLCO1A2</i> | miR-4445-5p      | 2 |
| <i>circSLCO1A2</i> | miR-4446-3p      | 1 |
| <i>circSLCO1A2</i> | miR-4446-5p      | 1 |
| <i>circSLCO1A2</i> | miR-4450         | 1 |
| <i>circSLCO1A2</i> | miR-4452         | 1 |
| <i>circSLCO1A2</i> | miR-4453/4538    | 2 |
| <i>circSLCO1A2</i> | miR-4455         | 3 |
| <i>circSLCO1A2</i> | miR-4457         | 2 |
| <i>circSLCO1A2</i> | miR-4459         | 2 |
| <i>circSLCO1A2</i> | miR-4461         | 2 |
| <i>circSLCO1A2</i> | miR-4464/4748    | 1 |
| <i>circSLCO1A2</i> | miR-4468         | 1 |
| <i>circSLCO1A2</i> | miR-4471/8059    | 1 |
| <i>circSLCO1A2</i> | miR-4474-5p      | 1 |
| <i>circSLCO1A2</i> | miR-4476/6876-5p | 3 |
| <i>circSLCO1A2</i> | miR-4477a        | 2 |
| <i>circSLCO1A2</i> | miR-4481/4745-5p | 1 |

|                    |                       |    |
|--------------------|-----------------------|----|
| <i>circSLCO1A2</i> | miR-4482-3p           | 1  |
| <i>circSLCO1A2</i> | miR-4491/4657         | 8  |
| <i>circSLCO1A2</i> | miR-4495              | 1  |
| <i>circSLCO1A2</i> | miR-4496              | 3  |
| <i>circSLCO1A2</i> | miR-449b-3p           | 1  |
| <i>circSLCO1A2</i> | miR-449c-3p           | 1  |
| <i>circSLCO1A2</i> | miR-4501              | 2  |
| <i>circSLCO1A2</i> | miR-4506              | 2  |
| <i>circSLCO1A2</i> | miR-4509              | 1  |
| <i>circSLCO1A2</i> | miR-450a-1-3p         | 1  |
| <i>circSLCO1A2</i> | miR-450b-3p/769-3p    | 2  |
| <i>circSLCO1A2</i> | miR-4511              | 1  |
| <i>circSLCO1A2</i> | miR-4514/4692         | 2  |
| <i>circSLCO1A2</i> | miR-4517              | 10 |
| <i>circSLCO1A2</i> | miR-4519              | 2  |
| <i>circSLCO1A2</i> | miR-452-3p            | 5  |
| <i>circSLCO1A2</i> | miR-452-5p/892-3p     | 1  |
| <i>circSLCO1A2</i> | miR-4520-2-3p         | 1  |
| <i>circSLCO1A2</i> | miR-4524a-3p          | 2  |
| <i>circSLCO1A2</i> | miR-4524b-3p          | 1  |
| <i>circSLCO1A2</i> | miR-4528              | 3  |
| <i>circSLCO1A2</i> | miR-4529-3p           | 1  |
| <i>circSLCO1A2</i> | miR-4533              | 1  |
| <i>circSLCO1A2</i> | miR-4540              | 1  |
| <i>circSLCO1A2</i> | miR-455-3p.2          | 2  |
| <i>circSLCO1A2</i> | miR-455-5p            | 1  |
| <i>circSLCO1A2</i> | miR-4633-3p/6500-5p   | 2  |
| <i>circSLCO1A2</i> | miR-4635              | 1  |
| <i>circSLCO1A2</i> | miR-4636              | 1  |
| <i>circSLCO1A2</i> | miR-4642              | 3  |
| <i>circSLCO1A2</i> | miR-4643              | 1  |
| <i>circSLCO1A2</i> | miR-4646-3p           | 2  |
| <i>circSLCO1A2</i> | miR-4652-3p           | 1  |
| <i>circSLCO1A2</i> | miR-4653-3p           | 2  |
| <i>circSLCO1A2</i> | miR-4656              | 1  |
| <i>circSLCO1A2</i> | miR-4658/6790-5p      | 1  |
| <i>circSLCO1A2</i> | miR-4659a-3p/4659b-3p | 3  |
| <i>circSLCO1A2</i> | miR-4659a-5p/4659b-5p | 2  |

|                    |                          |   |
|--------------------|--------------------------|---|
| <i>circSLCO1A2</i> | miR-466                  | 6 |
| <i>circSLCO1A2</i> | miR-4660                 | 1 |
| <i>circSLCO1A2</i> | miR-4662a-3p             | 1 |
| <i>circSLCO1A2</i> | miR-4666a-5p             | 1 |
| <i>circSLCO1A2</i> | miR-4666b                | 3 |
| <i>circSLCO1A2</i> | miR-4667-5p/4700-5p/8089 | 1 |
| <i>circSLCO1A2</i> | miR-4670-3p              | 4 |
| <i>circSLCO1A2</i> | miR-4674                 | 2 |
| <i>circSLCO1A2</i> | miR-4675/4741            | 1 |
| <i>circSLCO1A2</i> | miR-4677-3p              | 1 |
| <i>circSLCO1A2</i> | miR-4679                 | 1 |
| <i>circSLCO1A2</i> | miR-4680-3p              | 1 |
| <i>circSLCO1A2</i> | miR-4681                 | 2 |
| <i>circSLCO1A2</i> | miR-4682                 | 1 |
| <i>circSLCO1A2</i> | miR-4684-5p              | 3 |
| <i>circSLCO1A2</i> | miR-4686                 | 1 |
| <i>circSLCO1A2</i> | miR-4687-3p              | 1 |
| <i>circSLCO1A2</i> | miR-4690-5p              | 1 |
| <i>circSLCO1A2</i> | miR-4691-5p/6792-3p      | 1 |
| <i>circSLCO1A2</i> | miR-4693-5p              | 2 |
| <i>circSLCO1A2</i> | miR-4694-3p              | 6 |
| <i>circSLCO1A2</i> | miR-4694-5p              | 1 |
| <i>circSLCO1A2</i> | miR-4695-3p              | 1 |
| <i>circSLCO1A2</i> | miR-4698                 | 3 |
| <i>circSLCO1A2</i> | miR-4699-5p              | 1 |
| <i>circSLCO1A2</i> | miR-4700-3p              | 1 |
| <i>circSLCO1A2</i> | miR-4704-3p              | 1 |
| <i>circSLCO1A2</i> | miR-4705                 | 3 |
| <i>circSLCO1A2</i> | miR-4708-5p              | 1 |
| <i>circSLCO1A2</i> | miR-4709-3p              | 3 |
| <i>circSLCO1A2</i> | miR-4710                 | 1 |
| <i>circSLCO1A2</i> | miR-4711-5p              | 1 |
| <i>circSLCO1A2</i> | miR-4713-3p              | 2 |
| <i>circSLCO1A2</i> | miR-4717-3p              | 1 |
| <i>circSLCO1A2</i> | miR-4718                 | 1 |
| <i>circSLCO1A2</i> | miR-4720-3p              | 1 |
| <i>circSLCO1A2</i> | miR-4722-3p/6727-3p      | 1 |
| <i>circSLCO1A2</i> | miR-4722-5p              | 1 |

|                    |                     |   |
|--------------------|---------------------|---|
| <i>circSLCO1A2</i> | miR-4724-3p         | 1 |
| <i>circSLCO1A2</i> | miR-4724-5p         | 1 |
| <i>circSLCO1A2</i> | miR-4728-3p         | 2 |
| <i>circSLCO1A2</i> | miR-4729            | 2 |
| <i>circSLCO1A2</i> | miR-4738-3p         | 2 |
| <i>circSLCO1A2</i> | miR-4742-3p         | 2 |
| <i>circSLCO1A2</i> | miR-4742-5p         | 2 |
| <i>circSLCO1A2</i> | miR-4743-3p         | 1 |
| <i>circSLCO1A2</i> | miR-4744            | 1 |
| <i>circSLCO1A2</i> | miR-4752            | 6 |
| <i>circSLCO1A2</i> | miR-4753-3p         | 4 |
| <i>circSLCO1A2</i> | miR-4756-3p         | 2 |
| <i>circSLCO1A2</i> | miR-4759            | 1 |
| <i>circSLCO1A2</i> | miR-4760-3p         | 4 |
| <i>circSLCO1A2</i> | miR-4760-5p/8061    | 1 |
| <i>circSLCO1A2</i> | miR-4761-5p         | 1 |
| <i>circSLCO1A2</i> | miR-4762-3p         | 2 |
| <i>circSLCO1A2</i> | miR-4762-5p         | 1 |
| <i>circSLCO1A2</i> | miR-4764-3p         | 1 |
| <i>circSLCO1A2</i> | miR-4764-5p         | 2 |
| <i>circSLCO1A2</i> | miR-4765            | 1 |
| <i>circSLCO1A2</i> | miR-4766-5p         | 1 |
| <i>circSLCO1A2</i> | miR-4768-3p         | 2 |
| <i>circSLCO1A2</i> | miR-4768-5p/6833-3p | 4 |
| <i>circSLCO1A2</i> | miR-4769-3p/6817-5p | 2 |
| <i>circSLCO1A2</i> | miR-4772-3p         | 1 |
| <i>circSLCO1A2</i> | miR-4772-5p         | 1 |
| <i>circSLCO1A2</i> | miR-4773            | 2 |
| <i>circSLCO1A2</i> | miR-4774-3p         | 2 |
| <i>circSLCO1A2</i> | miR-4775            | 2 |
| <i>circSLCO1A2</i> | miR-4776-3p         | 1 |
| <i>circSLCO1A2</i> | miR-4777-3p         | 4 |
| <i>circSLCO1A2</i> | miR-4778-3p         | 1 |
| <i>circSLCO1A2</i> | miR-4778-5p         | 1 |
| <i>circSLCO1A2</i> | miR-4781-3p         | 4 |
| <i>circSLCO1A2</i> | miR-4782-5p/5706    | 1 |
| <i>circSLCO1A2</i> | miR-4789-3p         | 1 |
| <i>circSLCO1A2</i> | miR-4789-5p         | 1 |

|                    |                             |   |
|--------------------|-----------------------------|---|
| <i>circSLCO1A2</i> | miR-4790-3p                 | 1 |
| <i>circSLCO1A2</i> | miR-4792                    | 1 |
| <i>circSLCO1A2</i> | miR-4793-5p                 | 2 |
| <i>circSLCO1A2</i> | miR-4795-3p                 | 3 |
| <i>circSLCO1A2</i> | miR-4796-3p                 | 1 |
| <i>circSLCO1A2</i> | miR-4797-5p                 | 2 |
| <i>circSLCO1A2</i> | miR-4799-5p                 | 4 |
| <i>circSLCO1A2</i> | miR-4802-3p                 | 3 |
| <i>circSLCO1A2</i> | miR-4803                    | 1 |
| <i>circSLCO1A2</i> | miR-4804-3p                 | 1 |
| <i>circSLCO1A2</i> | miR-486-5p                  | 2 |
| <i>circSLCO1A2</i> | miR-487a-5p/487b-5p         | 3 |
| <i>circSLCO1A2</i> | miR-488-3p                  | 1 |
| <i>circSLCO1A2</i> | miR-488-5p                  | 1 |
| <i>circSLCO1A2</i> | miR-489-3p                  | 3 |
| <i>circSLCO1A2</i> | miR-492                     | 1 |
| <i>circSLCO1A2</i> | miR-493-5p                  | 3 |
| <i>circSLCO1A2</i> | miR-494-3p                  | 3 |
| <i>circSLCO1A2</i> | miR-495-3p                  | 2 |
| <i>circSLCO1A2</i> | miR-496.1                   | 2 |
| <i>circSLCO1A2</i> | miR-496.2                   | 2 |
| <i>circSLCO1A2</i> | miR-498                     | 2 |
| <i>circSLCO1A2</i> | miR-4999-5p                 | 1 |
| <i>circSLCO1A2</i> | miR-499a-3p/499b-3p         | 3 |
| <i>circSLCO1A2</i> | miR-499a-5p                 | 1 |
| <i>circSLCO1A2</i> | miR-5000-5p                 | 5 |
| <i>circSLCO1A2</i> | miR-5003-3p                 | 2 |
| <i>circSLCO1A2</i> | miR-5004-3p                 | 2 |
| <i>circSLCO1A2</i> | miR-5007-3p                 | 5 |
| <i>circSLCO1A2</i> | miR-5008-3p/6737-3p/7157-3p | 2 |
| <i>circSLCO1A2</i> | miR-5009-3p                 | 2 |
| <i>circSLCO1A2</i> | miR-5009-5p/8058            | 1 |
| <i>circSLCO1A2</i> | miR-500a-5p                 | 1 |
| <i>circSLCO1A2</i> | miR-501-3p/502-3p           | 2 |
| <i>circSLCO1A2</i> | miR-501-5p                  | 2 |
| <i>circSLCO1A2</i> | miR-5010-3p                 | 3 |
| <i>circSLCO1A2</i> | miR-5011-3p                 | 3 |
| <i>circSLCO1A2</i> | miR-5011-5p                 | 7 |



|                    |                             |   |
|--------------------|-----------------------------|---|
| <i>circSLCO1A2</i> | miR-502-5p                  | 1 |
| <i>circSLCO1A2</i> | miR-503-3p                  | 2 |
| <i>circSLCO1A2</i> | miR-505-3p.2                | 1 |
| <i>circSLCO1A2</i> | miR-506-5p                  | 1 |
| <i>circSLCO1A2</i> | miR-508-3p                  | 2 |
| <i>circSLCO1A2</i> | miR-508-5p                  | 1 |
| <i>circSLCO1A2</i> | miR-5087                    | 1 |
| <i>circSLCO1A2</i> | miR-5088-5p                 | 1 |
| <i>circSLCO1A2</i> | miR-5089-3p                 | 1 |
| <i>circSLCO1A2</i> | miR-5089-5p                 | 2 |
| <i>circSLCO1A2</i> | miR-509-3p                  | 1 |
| <i>circSLCO1A2</i> | miR-5093                    | 2 |
| <i>circSLCO1A2</i> | miR-5094                    | 1 |
| <i>circSLCO1A2</i> | miR-510-3p                  | 3 |
| <i>circSLCO1A2</i> | miR-5100                    | 3 |
| <i>circSLCO1A2</i> | miR-511-3p                  | 1 |
| <i>circSLCO1A2</i> | miR-511-5p                  | 4 |
| <i>circSLCO1A2</i> | miR-512-3p                  | 1 |
| <i>circSLCO1A2</i> | miR-513a-3p/513c-3p/3606-3p | 4 |
| <i>circSLCO1A2</i> | miR-513a-5p                 | 2 |
| <i>circSLCO1A2</i> | miR-514a-3p                 | 2 |
| <i>circSLCO1A2</i> | miR-515-5p/519e-5p          | 2 |
| <i>circSLCO1A2</i> | miR-516b-5p                 | 1 |
| <i>circSLCO1A2</i> | miR-517-5p                  | 1 |
| <i>circSLCO1A2</i> | miR-5186                    | 2 |
| <i>circSLCO1A2</i> | miR-5187-3p                 | 1 |
| <i>circSLCO1A2</i> | miR-518a-5p/527             | 1 |
| <i>circSLCO1A2</i> | miR-519-3p                  | 1 |
| <i>circSLCO1A2</i> | miR-5192                    | 1 |
| <i>circSLCO1A2</i> | miR-5196-3p                 | 2 |
| <i>circSLCO1A2</i> | miR-5197-3p                 | 3 |
| <i>circSLCO1A2</i> | miR-5197-5p                 | 4 |
| <i>circSLCO1A2</i> | miR-519d-5p                 | 3 |
| <i>circSLCO1A2</i> | miR-520f-5p                 | 1 |
| <i>circSLCO1A2</i> | miR-520g-5p                 | 1 |
| <i>circSLCO1A2</i> | miR-522-3p                  | 6 |
| <i>circSLCO1A2</i> | miR-524-5p                  | 3 |
| <i>circSLCO1A2</i> | miR-526b-5p                 | 1 |

|                    |                                               |    |
|--------------------|-----------------------------------------------|----|
| <i>circSLCO1A2</i> | miR-532-3p                                    | 3  |
| <i>circSLCO1A2</i> | miR-532-5p                                    | 1  |
| <i>circSLCO1A2</i> | miR-539-3p                                    | 1  |
| <i>circSLCO1A2</i> | miR-539-5p                                    | 1  |
| <i>circSLCO1A2</i> | miR-545-3p                                    | 1  |
| <i>circSLCO1A2</i> | miR-548ao-3p                                  | 1  |
| <i>circSLCO1A2</i> | miR-548au-3p                                  | 1  |
| <i>circSLCO1A2</i> | miR-548av-3p                                  | 1  |
| <i>circSLCO1A2</i> | miR-548aw                                     | 1  |
| <i>circSLCO1A2</i> | miR-548az-3p/548ar-3p/548a-3p/548e-3p/548f-3p | 1  |
| <i>circSLCO1A2</i> | miR-548az-5p/548t-5p                          | 1  |
| <i>circSLCO1A2</i> | miR-548b-3p                                   | 1  |
| <i>circSLCO1A2</i> | miR-548c-3p                                   | 2  |
| <i>circSLCO1A2</i> | miR-548e-5p                                   | 1  |
| <i>circSLCO1A2</i> | miR-548g-3p                                   | 1  |
| <i>circSLCO1A2</i> | miR-548m                                      | 1  |
| <i>circSLCO1A2</i> | miR-548n                                      | 1  |
| <i>circSLCO1A2</i> | miR-550b-3p                                   | 2  |
| <i>circSLCO1A2</i> | miR-551b-5p                                   | 5  |
| <i>circSLCO1A2</i> | miR-552-3p                                    | 1  |
| <i>circSLCO1A2</i> | miR-554                                       | 2  |
| <i>circSLCO1A2</i> | miR-556-3p                                    | 2  |
| <i>circSLCO1A2</i> | miR-556-5p                                    | 2  |
| <i>circSLCO1A2</i> | miR-5571-3p                                   | 2  |
| <i>circSLCO1A2</i> | miR-5571-5p                                   | 3  |
| <i>circSLCO1A2</i> | miR-5579-5p                                   | 2  |
| <i>circSLCO1A2</i> | miR-5580-3p                                   | 2  |
| <i>circSLCO1A2</i> | miR-5581-3p                                   | 1  |
| <i>circSLCO1A2</i> | miR-5582-3p                                   | 1  |
| <i>circSLCO1A2</i> | miR-5583-3p                                   | 10 |
| <i>circSLCO1A2</i> | miR-5584-3p                                   | 1  |
| <i>circSLCO1A2</i> | miR-5585-3p                                   | 2  |
| <i>circSLCO1A2</i> | miR-5586-3p                                   | 1  |
| <i>circSLCO1A2</i> | miR-5587-5p                                   | 2  |
| <i>circSLCO1A2</i> | miR-5590-5p                                   | 2  |
| <i>circSLCO1A2</i> | miR-561-5p                                    | 1  |
| <i>circSLCO1A2</i> | miR-567                                       | 3  |
| <i>circSLCO1A2</i> | miR-5680                                      | 2  |

|                    |            |   |
|--------------------|------------|---|
| <i>circSLCO1A2</i> | miR-5681b  | 2 |
| <i>circSLCO1A2</i> | miR-5683   | 1 |
| <i>circSLCO1A2</i> | miR-5687   | 1 |
| <i>circSLCO1A2</i> | miR-569    | 2 |
| <i>circSLCO1A2</i> | miR-5691   | 1 |
| <i>circSLCO1A2</i> | miR-5692a  | 2 |
| <i>circSLCO1A2</i> | miR-5692bc | 1 |
| <i>circSLCO1A2</i> | miR-5694   | 1 |
| <i>circSLCO1A2</i> | miR-5695   | 3 |
| <i>circSLCO1A2</i> | miR-5696   | 5 |
| <i>circSLCO1A2</i> | miR-570-3p | 1 |
| <i>circSLCO1A2</i> | miR-5700   | 4 |
| <i>circSLCO1A2</i> | miR-5701   | 1 |
| <i>circSLCO1A2</i> | miR-571    | 1 |
| <i>circSLCO1A2</i> | miR-574-5p | 1 |
| <i>circSLCO1A2</i> | miR-576-5p | 2 |
| <i>circSLCO1A2</i> | miR-577    | 2 |
| <i>circSLCO1A2</i> | miR-578    | 3 |
| <i>circSLCO1A2</i> | miR-579-3p | 5 |
| <i>circSLCO1A2</i> | miR-580-3p | 1 |
| <i>circSLCO1A2</i> | miR-580-5p | 3 |
| <i>circSLCO1A2</i> | miR-581    | 4 |
| <i>circSLCO1A2</i> | miR-582-3p | 1 |
| <i>circSLCO1A2</i> | miR-582-5p | 5 |
| <i>circSLCO1A2</i> | miR-584-3p | 1 |
| <i>circSLCO1A2</i> | miR-584-5p | 1 |
| <i>circSLCO1A2</i> | miR-585-3p | 1 |
| <i>circSLCO1A2</i> | miR-586    | 1 |
| <i>circSLCO1A2</i> | miR-587    | 1 |
| <i>circSLCO1A2</i> | miR-590-3p | 2 |
| <i>circSLCO1A2</i> | miR-592    | 2 |
| <i>circSLCO1A2</i> | miR-593-3p | 2 |
| <i>circSLCO1A2</i> | miR-595    | 1 |
| <i>circSLCO1A2</i> | miR-597-3p | 1 |
| <i>circSLCO1A2</i> | miR-599    | 2 |
| <i>circSLCO1A2</i> | miR-603    | 1 |
| <i>circSLCO1A2</i> | miR-604    | 1 |
| <i>circSLCO1A2</i> | miR-606    | 2 |

|                    |                  |   |
|--------------------|------------------|---|
| <i>circSLCO1A2</i> | miR-607          | 5 |
| <i>circSLCO1A2</i> | miR-6074         | 1 |
| <i>circSLCO1A2</i> | miR-6076/6797-3p | 1 |
| <i>circSLCO1A2</i> | miR-6083         | 7 |
| <i>circSLCO1A2</i> | miR-609          | 3 |
| <i>circSLCO1A2</i> | miR-610          | 2 |
| <i>circSLCO1A2</i> | miR-6124         | 6 |
| <i>circSLCO1A2</i> | miR-6126         | 3 |
| <i>circSLCO1A2</i> | miR-6128         | 1 |
| <i>circSLCO1A2</i> | miR-6131         | 2 |
| <i>circSLCO1A2</i> | miR-6165         | 1 |
| <i>circSLCO1A2</i> | miR-619-3p       | 1 |
| <i>circSLCO1A2</i> | miR-622          | 1 |
| <i>circSLCO1A2</i> | miR-627-3p       | 4 |
| <i>circSLCO1A2</i> | miR-628-3p       | 2 |
| <i>circSLCO1A2</i> | miR-628-5p       | 4 |
| <i>circSLCO1A2</i> | miR-629-3p       | 1 |
| <i>circSLCO1A2</i> | miR-629-5p       | 1 |
| <i>circSLCO1A2</i> | miR-630          | 1 |
| <i>circSLCO1A2</i> | miR-631/3661     | 1 |
| <i>circSLCO1A2</i> | miR-633          | 1 |
| <i>circSLCO1A2</i> | miR-635/6774-5p  | 1 |
| <i>circSLCO1A2</i> | miR-637          | 1 |
| <i>circSLCO1A2</i> | miR-638          | 2 |
| <i>circSLCO1A2</i> | miR-641/3617-5p  | 1 |
| <i>circSLCO1A2</i> | miR-643          | 2 |
| <i>circSLCO1A2</i> | miR-644a         | 2 |
| <i>circSLCO1A2</i> | miR-645          | 1 |
| <i>circSLCO1A2</i> | miR-647          | 1 |
| <i>circSLCO1A2</i> | miR-648          | 1 |
| <i>circSLCO1A2</i> | miR-6502-3p      | 1 |
| <i>circSLCO1A2</i> | miR-6503-3p      | 1 |
| <i>circSLCO1A2</i> | miR-6504-3p      | 2 |
| <i>circSLCO1A2</i> | miR-6505-5p      | 6 |
| <i>circSLCO1A2</i> | miR-6507-3p      | 2 |
| <i>circSLCO1A2</i> | miR-6507-5p      | 1 |
| <i>circSLCO1A2</i> | miR-6508-5p/8067 | 1 |
| <i>circSLCO1A2</i> | miR-6509-3p      | 1 |

|                    |              |   |
|--------------------|--------------|---|
| <i>circSLCO1A2</i> | miR-651-3p   | 4 |
| <i>circSLCO1A2</i> | miR-6510-5p  | 1 |
| <i>circSLCO1A2</i> | miR-6511-5p  | 1 |
| <i>circSLCO1A2</i> | miR-6513-3p  | 1 |
| <i>circSLCO1A2</i> | miR-6513-5p  | 1 |
| <i>circSLCO1A2</i> | miR-6515-3p  | 1 |
| <i>circSLCO1A2</i> | miR-6516-5p  | 1 |
| <i>circSLCO1A2</i> | miR-653-3p   | 1 |
| <i>circSLCO1A2</i> | miR-653-5p   | 1 |
| <i>circSLCO1A2</i> | miR-654-3p   | 1 |
| <i>circSLCO1A2</i> | miR-655-5p   | 1 |
| <i>circSLCO1A2</i> | miR-656-3p   | 3 |
| <i>circSLCO1A2</i> | miR-657      | 1 |
| <i>circSLCO1A2</i> | miR-659-3p   | 2 |
| <i>circSLCO1A2</i> | miR-659-5p   | 1 |
| <i>circSLCO1A2</i> | miR-664a-3p  | 3 |
| <i>circSLCO1A2</i> | miR-665      | 1 |
| <i>circSLCO1A2</i> | miR-668-3p   | 1 |
| <i>circSLCO1A2</i> | miR-670-3p   | 1 |
| <i>circSLCO1A2</i> | miR-6715b-3p | 5 |
| <i>circSLCO1A2</i> | miR-6716-5p  | 2 |
| <i>circSLCO1A2</i> | miR-6719-3p  | 2 |
| <i>circSLCO1A2</i> | miR-6723-5p  | 1 |
| <i>circSLCO1A2</i> | miR-6728-5p  | 2 |
| <i>circSLCO1A2</i> | miR-6730-3p  | 2 |
| <i>circSLCO1A2</i> | miR-6731-3p  | 1 |
| <i>circSLCO1A2</i> | miR-6733-3p  | 1 |
| <i>circSLCO1A2</i> | miR-6740-5p  | 2 |
| <i>circSLCO1A2</i> | miR-6741-5p  | 4 |
| <i>circSLCO1A2</i> | miR-6744-5p  | 2 |
| <i>circSLCO1A2</i> | miR-6747-3p  | 1 |
| <i>circSLCO1A2</i> | miR-6748-3p  | 1 |
| <i>circSLCO1A2</i> | miR-6748-5p  | 3 |
| <i>circSLCO1A2</i> | miR-6749-3p  | 1 |
| <i>circSLCO1A2</i> | miR-675-3p   | 3 |
| <i>circSLCO1A2</i> | miR-6755-5p  | 1 |
| <i>circSLCO1A2</i> | miR-6757-3p  | 1 |
| <i>circSLCO1A2</i> | miR-6759-5p  | 3 |

|                    |                     |   |
|--------------------|---------------------|---|
| <i>circSLCO1A2</i> | miR-676-3p          | 2 |
| <i>circSLCO1A2</i> | miR-676-5p          | 6 |
| <i>circSLCO1A2</i> | miR-6760-3p         | 1 |
| <i>circSLCO1A2</i> | miR-6761-5p         | 1 |
| <i>circSLCO1A2</i> | miR-6762-3p         | 1 |
| <i>circSLCO1A2</i> | miR-6765-3p         | 1 |
| <i>circSLCO1A2</i> | miR-6768-5p         | 1 |
| <i>circSLCO1A2</i> | miR-6772-3p         | 1 |
| <i>circSLCO1A2</i> | miR-6772-5p         | 3 |
| <i>circSLCO1A2</i> | miR-6773-3p         | 5 |
| <i>circSLCO1A2</i> | miR-6776-5p         | 1 |
| <i>circSLCO1A2</i> | miR-6778-3p         | 1 |
| <i>circSLCO1A2</i> | miR-6780a-3p        | 1 |
| <i>circSLCO1A2</i> | miR-6782-3p         | 1 |
| <i>circSLCO1A2</i> | miR-6791-3p/6829-3p | 1 |
| <i>circSLCO1A2</i> | miR-6792-5p         | 1 |
| <i>circSLCO1A2</i> | miR-6793-3p         | 1 |
| <i>circSLCO1A2</i> | miR-6793-5p         | 3 |
| <i>circSLCO1A2</i> | miR-6796-3p         | 1 |
| <i>circSLCO1A2</i> | miR-6796-5p         | 3 |
| <i>circSLCO1A2</i> | miR-6799-5p         | 1 |
| <i>circSLCO1A2</i> | miR-6800-3p         | 2 |
| <i>circSLCO1A2</i> | miR-6800-5p         | 1 |
| <i>circSLCO1A2</i> | miR-6802-5p         | 1 |
| <i>circSLCO1A2</i> | miR-6806-5p         | 2 |
| <i>circSLCO1A2</i> | miR-6809-3p         | 4 |
| <i>circSLCO1A2</i> | miR-6810-5p         | 1 |
| <i>circSLCO1A2</i> | miR-6816-3p         | 2 |
| <i>circSLCO1A2</i> | miR-6818-5p         | 6 |
| <i>circSLCO1A2</i> | miR-6823-5p         | 1 |
| <i>circSLCO1A2</i> | miR-6827-5p         | 1 |
| <i>circSLCO1A2</i> | miR-6829-5p         | 1 |
| <i>circSLCO1A2</i> | miR-6830-3p         | 2 |
| <i>circSLCO1A2</i> | miR-6831-3p         | 1 |
| <i>circSLCO1A2</i> | miR-6833-5p         | 6 |
| <i>circSLCO1A2</i> | miR-6836-3p         | 1 |
| <i>circSLCO1A2</i> | miR-6838-3p         | 1 |
| <i>circSLCO1A2</i> | miR-6839-3p         | 1 |

|                    |             |   |
|--------------------|-------------|---|
| <i>circSLCO1A2</i> | miR-6841-5p | 1 |
| <i>circSLCO1A2</i> | miR-6842-3p | 1 |
| <i>circSLCO1A2</i> | miR-6844    | 4 |
| <i>circSLCO1A2</i> | miR-6853-3p | 2 |
| <i>circSLCO1A2</i> | miR-6857-5p | 1 |
| <i>circSLCO1A2</i> | miR-6861-3p | 1 |
| <i>circSLCO1A2</i> | miR-6861-5p | 1 |
| <i>circSLCO1A2</i> | miR-6864-5p | 3 |
| <i>circSLCO1A2</i> | miR-6867-5p | 4 |
| <i>circSLCO1A2</i> | miR-6868-3p | 1 |
| <i>circSLCO1A2</i> | miR-6869-5p | 3 |
| <i>circSLCO1A2</i> | miR-6871-5p | 3 |
| <i>circSLCO1A2</i> | miR-6872-3p | 1 |
| <i>circSLCO1A2</i> | miR-6874-5p | 1 |
| <i>circSLCO1A2</i> | miR-6875-3p | 3 |
| <i>circSLCO1A2</i> | miR-6878-3p | 1 |
| <i>circSLCO1A2</i> | miR-6881-3p | 1 |
| <i>circSLCO1A2</i> | miR-6882-3p | 3 |
| <i>circSLCO1A2</i> | miR-6885-3p | 3 |
| <i>circSLCO1A2</i> | miR-6888-3p | 3 |
| <i>circSLCO1A2</i> | miR-6888-5p | 1 |
| <i>circSLCO1A2</i> | miR-6889-3p | 2 |
| <i>circSLCO1A2</i> | miR-6890-3p | 1 |
| <i>circSLCO1A2</i> | miR-6894-5p | 1 |
| <i>circSLCO1A2</i> | miR-6895-3p | 2 |
| <i>circSLCO1A2</i> | miR-7-3p    | 2 |
| <i>circSLCO1A2</i> | miR-7106-5p | 1 |
| <i>circSLCO1A2</i> | miR-7111-3p | 1 |
| <i>circSLCO1A2</i> | miR-7112-3p | 1 |
| <i>circSLCO1A2</i> | miR-7151-5p | 4 |
| <i>circSLCO1A2</i> | miR-7152-3p | 1 |
| <i>circSLCO1A2</i> | miR-7152-5p | 2 |
| <i>circSLCO1A2</i> | miR-7154-3p | 1 |
| <i>circSLCO1A2</i> | miR-7154-5p | 4 |
| <i>circSLCO1A2</i> | miR-7155-5p | 1 |
| <i>circSLCO1A2</i> | miR-7156-3p | 1 |
| <i>circSLCO1A2</i> | miR-7158-5p | 1 |
| <i>circSLCO1A2</i> | miR-7159-3p | 1 |

|                    |                           |   |
|--------------------|---------------------------|---|
| <i>circSLCO1A2</i> | miR-7159-5p               | 1 |
| <i>circSLCO1A2</i> | miR-7161-3p               | 1 |
| <i>circSLCO1A2</i> | miR-7515                  | 1 |
| <i>circSLCO1A2</i> | miR-758-3p                | 6 |
| <i>circSLCO1A2</i> | miR-759                   | 1 |
| <i>circSLCO1A2</i> | miR-762/4492/4498/5001-5p | 1 |
| <i>circSLCO1A2</i> | miR-764                   | 3 |
| <i>circSLCO1A2</i> | miR-7641                  | 3 |
| <i>circSLCO1A2</i> | miR-765                   | 1 |
| <i>circSLCO1A2</i> | miR-766-3p                | 1 |
| <i>circSLCO1A2</i> | miR-766-5p                | 1 |
| <i>circSLCO1A2</i> | miR-7703                  | 1 |
| <i>circSLCO1A2</i> | miR-7844-5p               | 2 |
| <i>circSLCO1A2</i> | miR-7851-3p               | 1 |
| <i>circSLCO1A2</i> | miR-7856-5p               | 1 |
| <i>circSLCO1A2</i> | miR-7974                  | 1 |
| <i>circSLCO1A2</i> | miR-7975                  | 2 |
| <i>circSLCO1A2</i> | miR-7977                  | 1 |
| <i>circSLCO1A2</i> | miR-8055                  | 1 |
| <i>circSLCO1A2</i> | miR-8056                  | 2 |
| <i>circSLCO1A2</i> | miR-8060                  | 1 |
| <i>circSLCO1A2</i> | miR-8062                  | 1 |
| <i>circSLCO1A2</i> | miR-8063                  | 3 |
| <i>circSLCO1A2</i> | miR-8066                  | 6 |
| <i>circSLCO1A2</i> | miR-8070                  | 3 |
| <i>circSLCO1A2</i> | miR-8074                  | 1 |
| <i>circSLCO1A2</i> | miR-8075                  | 3 |
| <i>circSLCO1A2</i> | miR-8076                  | 5 |
| <i>circSLCO1A2</i> | miR-8080                  | 2 |
| <i>circSLCO1A2</i> | miR-8081                  | 2 |
| <i>circSLCO1A2</i> | miR-8083                  | 1 |
| <i>circSLCO1A2</i> | miR-8086                  | 1 |
| <i>circSLCO1A2</i> | miR-8485                  | 1 |
| <i>circSLCO1A2</i> | miR-873-3p                | 2 |
| <i>circSLCO1A2</i> | miR-873-5p.1              | 1 |
| <i>circSLCO1A2</i> | miR-873-5p.2              | 1 |
| <i>circSLCO1A2</i> | miR-875-3p                | 2 |
| <i>circSLCO1A2</i> | miR-875-5p                | 4 |



|                    |                         |   |
|--------------------|-------------------------|---|
| <i>circSLCO1A2</i> | miR-876-3p              | 3 |
| <i>circSLCO1A2</i> | miR-876-5p              | 3 |
| <i>circSLCO1A2</i> | miR-877-3p              | 2 |
| <i>circSLCO1A2</i> | miR-887-5p              | 1 |
| <i>circSLCO1A2</i> | miR-888-3p              | 1 |
| <i>circSLCO1A2</i> | miR-889-3p              | 3 |
| <i>circSLCO1A2</i> | miR-889-5p              | 2 |
| <i>circSLCO1A2</i> | miR-891b                | 4 |
| <i>circSLCO1A2</i> | miR-892-5p              | 1 |
| <i>circSLCO1A2</i> | miR-892a                | 1 |
| <i>circSLCO1A2</i> | miR-892b                | 1 |
| <i>circSLCO1A2</i> | miR-9-5p                | 2 |
| <i>circSLCO1A2</i> | miR-921                 | 1 |
| <i>circSLCO1A2</i> | miR-92a-1-5p            | 1 |
| <i>circSLCO1A2</i> | miR-940/6808-5p/6893-5p | 1 |
| <i>circSLCO1A2</i> | miR-942-3p              | 1 |
| <i>circSLCO1A2</i> | miR-942-5p              | 4 |
| <i>circSLCO1A2</i> | miR-943                 | 2 |
| <i>circSLCO1A2</i> | miR-944                 | 3 |
| <i>circSLCO1A2</i> | miR-96-5p/1271-5p       | 2 |
| <i>circSLCO1A2</i> | miR-99-3p               | 1 |
| <i>circSOBP</i>    | miR-10-5p               | 1 |
| <i>circSOBP</i>    | miR-103b                | 1 |
| <i>circSOBP</i>    | miR-1184                | 3 |
| <i>circSOBP</i>    | miR-1200                | 1 |
| <i>circSOBP</i>    | miR-1205                | 3 |
| <i>circSOBP</i>    | miR-1206                | 1 |
| <i>circSOBP</i>    | miR-1208                | 1 |
| <i>circSOBP</i>    | miR-125-5p              | 1 |
| <i>circSOBP</i>    | miR-125a-3p             | 2 |
| <i>circSOBP</i>    | miR-129-3p              | 2 |
| <i>circSOBP</i>    | miR-1298-5p             | 2 |
| <i>circSOBP</i>    | miR-133a-5p             | 1 |
| <i>circSOBP</i>    | miR-135b-3p             | 1 |
| <i>circSOBP</i>    | miR-138-5p              | 1 |
| <i>circSOBP</i>    | miR-141-3p/200-3p       | 1 |
| <i>circSOBP</i>    | miR-145-5p              | 3 |
| <i>circSOBP</i>    | miR-146-5p              | 2 |

|                 |                     |   |
|-----------------|---------------------|---|
| <i>circSOBP</i> | miR-146b-3p         | 2 |
| <i>circSOBP</i> | miR-154-3p/487-3p   | 5 |
| <i>circSOBP</i> | miR-16-2-3p/195-3p  | 1 |
| <i>circSOBP</i> | miR-17-3p           | 3 |
| <i>circSOBP</i> | miR-18-5p           | 1 |
| <i>circSOBP</i> | miR-181-3p/4420     | 1 |
| <i>circSOBP</i> | miR-182-5p          | 1 |
| <i>circSOBP</i> | miR-1825            | 3 |
| <i>circSOBP</i> | miR-183-3p          | 2 |
| <i>circSOBP</i> | miR-186-5p          | 1 |
| <i>circSOBP</i> | miR-19-5p           | 3 |
| <i>circSOBP</i> | miR-1914-5p         | 1 |
| <i>circSOBP</i> | miR-194-3p          | 3 |
| <i>circSOBP</i> | miR-197-3p          | 2 |
| <i>circSOBP</i> | miR-197-5p/3132     | 1 |
| <i>circSOBP</i> | miR-1976            | 2 |
| <i>circSOBP</i> | miR-199-5p          | 3 |
| <i>circSOBP</i> | miR-203a-3p.1       | 1 |
| <i>circSOBP</i> | miR-2052            | 3 |
| <i>circSOBP</i> | miR-20b-3p          | 1 |
| <i>circSOBP</i> | miR-214-5p          | 1 |
| <i>circSOBP</i> | miR-218-5p          | 2 |
| <i>circSOBP</i> | miR-2355-5p         | 1 |
| <i>circSOBP</i> | miR-297             | 2 |
| <i>circSOBP</i> | miR-29b-2-5p        | 1 |
| <i>circSOBP</i> | miR-31-5p           | 2 |
| <i>circSOBP</i> | miR-3119            | 1 |
| <i>circSOBP</i> | miR-3121-5p         | 1 |
| <i>circSOBP</i> | miR-3133            | 1 |
| <i>circSOBP</i> | miR-3137            | 1 |
| <i>circSOBP</i> | miR-3140-5p         | 2 |
| <i>circSOBP</i> | miR-3149            | 1 |
| <i>circSOBP</i> | miR-3158-5p         | 3 |
| <i>circSOBP</i> | miR-3165            | 1 |
| <i>circSOBP</i> | miR-3173-3p/6891-5p | 3 |
| <i>circSOBP</i> | miR-3173-5p         | 2 |
| <i>circSOBP</i> | miR-3180-5p         | 1 |
| <i>circSOBP</i> | miR-3190-3p         | 2 |

|                 |                       |   |
|-----------------|-----------------------|---|
| <i>circSOBP</i> | miR-323a-5p           | 1 |
| <i>circSOBP</i> | miR-338-5p            | 2 |
| <i>circSOBP</i> | miR-345-3p            | 2 |
| <i>circSOBP</i> | miR-362-5p/500b-5p    | 1 |
| <i>circSOBP</i> | miR-3651              | 2 |
| <i>circSOBP</i> | miR-3653-5p           | 2 |
| <i>circSOBP</i> | miR-3665              | 1 |
| <i>circSOBP</i> | miR-3677-5p           | 1 |
| <i>circSOBP</i> | miR-3686              | 3 |
| <i>circSOBP</i> | miR-3688-5p           | 1 |
| <i>circSOBP</i> | miR-3692-5p           | 1 |
| <i>circSOBP</i> | miR-374a-3p           | 2 |
| <i>circSOBP</i> | miR-376-3p            | 2 |
| <i>circSOBP</i> | miR-378a-5p           | 1 |
| <i>circSOBP</i> | miR-3909              | 1 |
| <i>circSOBP</i> | miR-3934-5p           | 2 |
| <i>circSOBP</i> | miR-4268              | 1 |
| <i>circSOBP</i> | miR-4272              | 4 |
| <i>circSOBP</i> | miR-4293              | 2 |
| <i>circSOBP</i> | miR-4299              | 2 |
| <i>circSOBP</i> | miR-4427              | 2 |
| <i>circSOBP</i> | miR-4428              | 3 |
| <i>circSOBP</i> | miR-4433b-3p          | 2 |
| <i>circSOBP</i> | miR-4448              | 1 |
| <i>circSOBP</i> | miR-4452              | 2 |
| <i>circSOBP</i> | miR-4456              | 2 |
| <i>circSOBP</i> | miR-4470              | 1 |
| <i>circSOBP</i> | miR-4480              | 2 |
| <i>circSOBP</i> | miR-4506              | 1 |
| <i>circSOBP</i> | miR-455-5p            | 2 |
| <i>circSOBP</i> | miR-4653-3p           | 2 |
| <i>circSOBP</i> | miR-4659a-5p/4659b-5p | 3 |
| <i>circSOBP</i> | miR-4662-5p           | 2 |
| <i>circSOBP</i> | miR-4680-3p           | 2 |
| <i>circSOBP</i> | miR-4682              | 1 |
| <i>circSOBP</i> | miR-4687-5p           | 2 |
| <i>circSOBP</i> | miR-4691-3p           | 1 |
| <i>circSOBP</i> | miR-4710              | 2 |

|                 |                              |   |
|-----------------|------------------------------|---|
| <i>circSOBP</i> | miR-4713-5p                  | 1 |
| <i>circSOBP</i> | miR-4714-3p                  | 1 |
| <i>circSOBP</i> | miR-4725-5p                  | 1 |
| <i>circSOBP</i> | miR-4732-3p                  | 1 |
| <i>circSOBP</i> | miR-4760-3p                  | 2 |
| <i>circSOBP</i> | miR-4769-3p/6817-5p          | 4 |
| <i>circSOBP</i> | miR-4773                     | 3 |
| <i>circSOBP</i> | miR-4775                     | 2 |
| <i>circSOBP</i> | miR-4792                     | 2 |
| <i>circSOBP</i> | miR-4796-3p                  | 1 |
| <i>circSOBP</i> | miR-488-3p                   | 1 |
| <i>circSOBP</i> | miR-5000-5p                  | 1 |
| <i>circSOBP</i> | miR-5008-3p/6737-3p/7157-3p  | 1 |
| <i>circSOBP</i> | miR-501-5p                   | 1 |
| <i>circSOBP</i> | miR-504-5p.1                 | 1 |
| <i>circSOBP</i> | miR-5187-3p                  | 2 |
| <i>circSOBP</i> | miR-548ai/548ag/548ba/570-5p | 2 |
| <i>circSOBP</i> | miR-548m                     | 2 |
| <i>circSOBP</i> | miR-548q                     | 2 |
| <i>circSOBP</i> | miR-555                      | 1 |
| <i>circSOBP</i> | miR-5585-3p                  | 1 |
| <i>circSOBP</i> | miR-5590-5p                  | 3 |
| <i>circSOBP</i> | miR-5680                     | 1 |
| <i>circSOBP</i> | miR-5681a                    | 2 |
| <i>circSOBP</i> | miR-5692a                    | 3 |
| <i>circSOBP</i> | miR-5693                     | 3 |
| <i>circSOBP</i> | miR-5701                     | 2 |
| <i>circSOBP</i> | miR-5702                     | 1 |
| <i>circSOBP</i> | miR-580-3p                   | 2 |
| <i>circSOBP</i> | miR-584-5p                   | 1 |
| <i>circSOBP</i> | miR-589-5p                   | 2 |
| <i>circSOBP</i> | miR-590-3p                   | 2 |
| <i>circSOBP</i> | miR-596                      | 2 |
| <i>circSOBP</i> | miR-6083                     | 3 |
| <i>circSOBP</i> | miR-6131                     | 1 |
| <i>circSOBP</i> | miR-627-5p                   | 2 |
| <i>circSOBP</i> | miR-634                      | 1 |
| <i>circSOBP</i> | miR-636                      | 1 |

|                 |                     |   |
|-----------------|---------------------|---|
| <i>circSOBP</i> | miR-640             | 1 |
| <i>circSOBP</i> | miR-6505-5p         | 3 |
| <i>circSOBP</i> | miR-6507-5p         | 1 |
| <i>circSOBP</i> | miR-6511-3p         | 1 |
| <i>circSOBP</i> | miR-6511-5p         | 1 |
| <i>circSOBP</i> | miR-653-3p          | 1 |
| <i>circSOBP</i> | miR-657             | 1 |
| <i>circSOBP</i> | miR-659-3p          | 1 |
| <i>circSOBP</i> | miR-664a-3p         | 1 |
| <i>circSOBP</i> | miR-668-3p          | 1 |
| <i>circSOBP</i> | miR-6730-5p         | 2 |
| <i>circSOBP</i> | miR-6741-3p         | 1 |
| <i>circSOBP</i> | miR-675-3p          | 2 |
| <i>circSOBP</i> | miR-6752-3p         | 1 |
| <i>circSOBP</i> | miR-6755-5p         | 1 |
| <i>circSOBP</i> | miR-6757-3p         | 2 |
| <i>circSOBP</i> | miR-676-3p          | 1 |
| <i>circSOBP</i> | miR-6760-3p         | 1 |
| <i>circSOBP</i> | miR-6779-3p         | 2 |
| <i>circSOBP</i> | miR-6784-3p/6862-3p | 1 |
| <i>circSOBP</i> | miR-6809-5p         | 2 |
| <i>circSOBP</i> | miR-6811-3p         | 1 |
| <i>circSOBP</i> | miR-6815-5p/6865-5p | 1 |
| <i>circSOBP</i> | miR-6822-3p         | 1 |
| <i>circSOBP</i> | miR-6830-5p         | 4 |
| <i>circSOBP</i> | miR-6841-5p         | 1 |
| <i>circSOBP</i> | miR-6844            | 1 |
| <i>circSOBP</i> | miR-6845-3p         | 1 |
| <i>circSOBP</i> | miR-6849-3p         | 1 |
| <i>circSOBP</i> | miR-6853-3p         | 1 |
| <i>circSOBP</i> | miR-6867-3p         | 1 |
| <i>circSOBP</i> | miR-6880-5p         | 1 |
| <i>circSOBP</i> | miR-6882-3p         | 2 |
| <i>circSOBP</i> | miR-6889-3p         | 1 |
| <i>circSOBP</i> | miR-6890-3p         | 1 |
| <i>circSOBP</i> | miR-760             | 1 |
| <i>circSOBP</i> | miR-7855-5p         | 2 |
| <i>circSOBP</i> | miR-7976            | 2 |

|                 |                                       |   |
|-----------------|---------------------------------------|---|
| <i>circSOBP</i> | miR-7978                              | 2 |
| <i>circSOBP</i> | miR-8055                              | 2 |
| <i>circSOBP</i> | miR-8064                              | 2 |
| <i>circSOBP</i> | miR-8066                              | 2 |
| <i>circSOBP</i> | miR-8071                              | 1 |
| <i>circSOBP</i> | miR-876-3p                            | 1 |
| <i>circSOBP</i> | miR-877-3p                            | 1 |
| <i>circSOBP</i> | miR-891a-3p                           | 1 |
| <i>circSOBP</i> | miR-93-3p                             | 1 |
| <i>circSOBP</i> | miR-937-5p                            | 2 |
| <i>circSOBP</i> | miR-95-5p                             | 4 |
| <i>circSOBP</i> | miR-96-5p/1271-5p                     | 1 |
| <i>circSOBP</i> | let-7a-2-3p/let-7g-3p                 | 1 |
| <i>circSOBP</i> | let-7a-3p/let-7b-3p/let-7f-1-3p/98-3p | 2 |
| <i>circSOBP</i> | let-7c-3p                             | 1 |
| <i>circSOBP</i> | let-7f-2-3p/1185-3p                   | 2 |
| <i>circSOBP</i> | miR-1-5p                              | 1 |
| <i>circSOBP</i> | miR-101-3p.1                          | 2 |
| <i>circSOBP</i> | miR-103-3p/107                        | 1 |
| <i>circSOBP</i> | miR-1178-3p                           | 1 |
| <i>circSOBP</i> | miR-1179                              | 1 |
| <i>circSOBP</i> | miR-1180-5p                           | 1 |
| <i>circSOBP</i> | miR-1183                              | 1 |
| <i>circSOBP</i> | miR-1193                              | 1 |
| <i>circSOBP</i> | miR-1207-3p                           | 1 |
| <i>circSOBP</i> | miR-1207-5p/4763-3p                   | 1 |
| <i>circSOBP</i> | miR-1225-3p                           | 1 |
| <i>circSOBP</i> | miR-1226-3p                           | 1 |
| <i>circSOBP</i> | miR-1227-3p                           | 1 |
| <i>circSOBP</i> | miR-1233-3p                           | 1 |
| <i>circSOBP</i> | miR-1236-5p                           | 1 |
| <i>circSOBP</i> | miR-124-3p.2/506-3p                   | 1 |
| <i>circSOBP</i> | miR-1243                              | 1 |
| <i>circSOBP</i> | miR-1245a/8079                        | 1 |
| <i>circSOBP</i> | miR-1246                              | 2 |
| <i>circSOBP</i> | miR-1249-3p                           | 1 |
| <i>circSOBP</i> | miR-1250-3p                           | 4 |
| <i>circSOBP</i> | miR-1252-3p                           | 2 |

|                 |                    |   |
|-----------------|--------------------|---|
| <i>circSOBP</i> | miR-1253           | 1 |
| <i>circSOBP</i> | miR-1255a/1255b-5p | 1 |
| <i>circSOBP</i> | miR-1255b-2-3p     | 1 |
| <i>circSOBP</i> | miR-1256           | 2 |
| <i>circSOBP</i> | miR-126-5p         | 2 |
| <i>circSOBP</i> | miR-1260a/1260b    | 1 |
| <i>circSOBP</i> | miR-1261           | 2 |
| <i>circSOBP</i> | miR-1263           | 1 |
| <i>circSOBP</i> | miR-1265           | 1 |
| <i>circSOBP</i> | miR-1266-3p        | 1 |
| <i>circSOBP</i> | miR-1266-5p/4518   | 3 |
| <i>circSOBP</i> | miR-1272           | 2 |
| <i>circSOBP</i> | miR-1273d          | 2 |
| <i>circSOBP</i> | miR-1273e          | 1 |
| <i>circSOBP</i> | miR-1273g-3p       | 3 |
| <i>circSOBP</i> | miR-1273g-5p       | 1 |
| <i>circSOBP</i> | miR-1273h-3p       | 2 |
| <i>circSOBP</i> | miR-1276           | 2 |
| <i>circSOBP</i> | miR-1277-5p        | 2 |
| <i>circSOBP</i> | miR-1278           | 1 |
| <i>circSOBP</i> | miR-1279           | 1 |
| <i>circSOBP</i> | miR-1281           | 1 |
| <i>circSOBP</i> | miR-1285-5p        | 1 |
| <i>circSOBP</i> | miR-1286           | 1 |
| <i>circSOBP</i> | miR-1287-3p        | 2 |
| <i>circSOBP</i> | miR-1288-5p        | 1 |
| <i>circSOBP</i> | miR-129-5p         | 2 |
| <i>circSOBP</i> | miR-1290           | 2 |
| <i>circSOBP</i> | miR-1295b-3p       | 1 |
| <i>circSOBP</i> | miR-1295b-5p/1912  | 1 |
| <i>circSOBP</i> | miR-1298-3p        | 1 |
| <i>circSOBP</i> | miR-1301-3p        | 2 |
| <i>circSOBP</i> | miR-1303           | 1 |
| <i>circSOBP</i> | miR-1304-3p        | 1 |
| <i>circSOBP</i> | miR-1305           | 1 |
| <i>circSOBP</i> | miR-1306-5p        | 1 |
| <i>circSOBP</i> | miR-132-3p/212-3p  | 3 |
| <i>circSOBP</i> | miR-1322           | 2 |

|                 |                     |   |
|-----------------|---------------------|---|
| <i>circSOBP</i> | miR-1323            | 1 |
| <i>circSOBP</i> | miR-1324            | 1 |
| <i>circSOBP</i> | miR-1343-3p         | 1 |
| <i>circSOBP</i> | miR-135a-3p         | 1 |
| <i>circSOBP</i> | miR-138-2-3p        | 1 |
| <i>circSOBP</i> | miR-140-3p.1        | 1 |
| <i>circSOBP</i> | miR-140-3p.2        | 2 |
| <i>circSOBP</i> | miR-140-5p          | 1 |
| <i>circSOBP</i> | miR-142-3p.2        | 1 |
| <i>circSOBP</i> | miR-143-5p          | 3 |
| <i>circSOBP</i> | miR-144-3p          | 2 |
| <i>circSOBP</i> | miR-146a-3p         | 1 |
| <i>circSOBP</i> | miR-148-3p/152-3p   | 1 |
| <i>circSOBP</i> | miR-148a-5p         | 1 |
| <i>circSOBP</i> | miR-148b-5p/6874-3p | 4 |
| <i>circSOBP</i> | miR-149-5p          | 2 |
| <i>circSOBP</i> | miR-150-3p          | 1 |
| <i>circSOBP</i> | miR-151-3p          | 1 |
| <i>circSOBP</i> | miR-152-5p          | 1 |
| <i>circSOBP</i> | miR-153-5p          | 2 |
| <i>circSOBP</i> | miR-155-3p          | 1 |
| <i>circSOBP</i> | miR-15a-3p          | 1 |
| <i>circSOBP</i> | miR-15b-3p          | 1 |
| <i>circSOBP</i> | miR-16-1-3p         | 3 |
| <i>circSOBP</i> | miR-181-5p          | 2 |
| <i>circSOBP</i> | miR-182-3p          | 1 |
| <i>circSOBP</i> | miR-183-5p.1        | 1 |
| <i>circSOBP</i> | miR-183-5p.2        | 1 |
| <i>circSOBP</i> | miR-185-5p          | 2 |
| <i>circSOBP</i> | miR-188-3p          | 1 |
| <i>circSOBP</i> | miR-18a-3p          | 1 |
| <i>circSOBP</i> | miR-1911-3p         | 2 |
| <i>circSOBP</i> | miR-1915-3p/6764-5p | 1 |
| <i>circSOBP</i> | miR-192-3p          | 2 |
| <i>circSOBP</i> | miR-193-3p          | 1 |
| <i>circSOBP</i> | miR-196b-3p         | 1 |
| <i>circSOBP</i> | miR-1972            | 2 |
| <i>circSOBP</i> | miR-199-3p          | 1 |



|                 |                     |   |
|-----------------|---------------------|---|
| <i>circSOBP</i> | miR-200-3p/429      | 2 |
| <i>circSOBP</i> | miR-200ab-5p        | 2 |
| <i>circSOBP</i> | miR-202-5p          | 1 |
| <i>circSOBP</i> | miR-203a-5p         | 1 |
| <i>circSOBP</i> | miR-203b-5p/6718-5p | 2 |
| <i>circSOBP</i> | miR-205-3p          | 3 |
| <i>circSOBP</i> | miR-2053            | 1 |
| <i>circSOBP</i> | miR-208-5p          | 1 |
| <i>circSOBP</i> | miR-2114-3p         | 1 |
| <i>circSOBP</i> | miR-2115-3p         | 1 |
| <i>circSOBP</i> | miR-2116-5p         | 3 |
| <i>circSOBP</i> | miR-2117            | 1 |
| <i>circSOBP</i> | miR-218-1-3p        | 1 |
| <i>circSOBP</i> | miR-218-2-3p        | 1 |
| <i>circSOBP</i> | miR-22-3p           | 1 |
| <i>circSOBP</i> | miR-22-5p           | 3 |
| <i>circSOBP</i> | miR-221-3p/222-3p   | 1 |
| <i>circSOBP</i> | miR-222-5p          | 2 |
| <i>circSOBP</i> | miR-223-5p          | 1 |
| <i>circSOBP</i> | miR-224-5p          | 2 |
| <i>circSOBP</i> | miR-2276-5p         | 2 |
| <i>circSOBP</i> | miR-2277-3p         | 1 |
| <i>circSOBP</i> | miR-2278            | 2 |
| <i>circSOBP</i> | miR-23-3p           | 1 |
| <i>circSOBP</i> | miR-2355-3p         | 1 |
| <i>circSOBP</i> | miR-2392            | 2 |
| <i>circSOBP</i> | miR-24-5p           | 1 |
| <i>circSOBP</i> | miR-2467-3p         | 1 |
| <i>circSOBP</i> | miR-2681-3p         | 1 |
| <i>circSOBP</i> | miR-2681-5p         | 1 |
| <i>circSOBP</i> | miR-26b-3p          | 1 |
| <i>circSOBP</i> | miR-28-3p           | 2 |
| <i>circSOBP</i> | miR-2861            | 1 |
| <i>circSOBP</i> | miR-296-5p          | 1 |
| <i>circSOBP</i> | miR-298             | 1 |
| <i>circSOBP</i> | miR-29b-1-5p        | 1 |
| <i>circSOBP</i> | miR-30-3p           | 2 |
| <i>circSOBP</i> | miR-302a-5p         | 1 |

|                 |                           |   |
|-----------------|---------------------------|---|
| <i>circSOBP</i> | miR-302b-5p/302d-5p       | 1 |
| <i>circSOBP</i> | miR-302c-5p               | 2 |
| <i>circSOBP</i> | miR-302f                  | 2 |
| <i>circSOBP</i> | miR-3064-5p               | 1 |
| <i>circSOBP</i> | miR-3065-3p               | 2 |
| <i>circSOBP</i> | miR-3074-3p               | 3 |
| <i>circSOBP</i> | miR-3120-3p               | 1 |
| <i>circSOBP</i> | miR-3122/3913-5p          | 1 |
| <i>circSOBP</i> | miR-3123                  | 3 |
| <i>circSOBP</i> | miR-3126-3p               | 1 |
| <i>circSOBP</i> | miR-3127-5p               | 1 |
| <i>circSOBP</i> | miR-3128                  | 4 |
| <i>circSOBP</i> | miR-3129-3p/5583-5p       | 3 |
| <i>circSOBP</i> | miR-3130-5p/4482-5p       | 1 |
| <i>circSOBP</i> | miR-3134                  | 3 |
| <i>circSOBP</i> | miR-3136-3p/7155-3p       | 2 |
| <i>circSOBP</i> | miR-3136-5p/4439          | 2 |
| <i>circSOBP</i> | miR-3140-3p               | 2 |
| <i>circSOBP</i> | miR-3143                  | 2 |
| <i>circSOBP</i> | miR-3145-5p               | 1 |
| <i>circSOBP</i> | miR-3146                  | 1 |
| <i>circSOBP</i> | miR-3150a-5p/3150b-5p     | 1 |
| <i>circSOBP</i> | miR-3153/6733-5p/6739-5p  | 2 |
| <i>circSOBP</i> | miR-3156-3p               | 1 |
| <i>circSOBP</i> | miR-3157-3p               | 1 |
| <i>circSOBP</i> | miR-3159                  | 2 |
| <i>circSOBP</i> | miR-3160-3p               | 1 |
| <i>circSOBP</i> | miR-3161                  | 1 |
| <i>circSOBP</i> | miR-3162-3p               | 1 |
| <i>circSOBP</i> | miR-3162-5p               | 1 |
| <i>circSOBP</i> | miR-3163                  | 2 |
| <i>circSOBP</i> | miR-3166                  | 1 |
| <i>circSOBP</i> | miR-3168                  | 4 |
| <i>circSOBP</i> | miR-3182                  | 2 |
| <i>circSOBP</i> | miR-3183/4723-3p/6769b-3p | 1 |
| <i>circSOBP</i> | miR-3187-3p               | 1 |
| <i>circSOBP</i> | miR-3189-5p               | 1 |
| <i>circSOBP</i> | miR-3194-3p               | 2 |

|                 |                           |   |
|-----------------|---------------------------|---|
| <i>circSOBP</i> | miR-3200-3p               | 1 |
| <i>circSOBP</i> | miR-3201/4791             | 1 |
| <i>circSOBP</i> | miR-320e                  | 1 |
| <i>circSOBP</i> | miR-323-3p                | 2 |
| <i>circSOBP</i> | miR-323b-3p               | 2 |
| <i>circSOBP</i> | miR-324-3p/1913           | 1 |
| <i>circSOBP</i> | miR-326                   | 3 |
| <i>circSOBP</i> | miR-329-3p/362-3p         | 1 |
| <i>circSOBP</i> | miR-330-3p                | 1 |
| <i>circSOBP</i> | miR-330-3p.2              | 3 |
| <i>circSOBP</i> | miR-335-3p                | 3 |
| <i>circSOBP</i> | miR-338-3p                | 1 |
| <i>circSOBP</i> | miR-339-3p                | 1 |
| <i>circSOBP</i> | miR-33b-3p/515-3p/519e-3p | 1 |
| <i>circSOBP</i> | miR-34-5p/449-5p          | 1 |
| <i>circSOBP</i> | miR-340-5p                | 3 |
| <i>circSOBP</i> | miR-342-3p                | 1 |
| <i>circSOBP</i> | miR-34a-3p                | 1 |
| <i>circSOBP</i> | miR-34b-3p                | 1 |
| <i>circSOBP</i> | miR-34c-3p                | 1 |
| <i>circSOBP</i> | miR-3607-3p               | 1 |
| <i>circSOBP</i> | miR-361-5p                | 1 |
| <i>circSOBP</i> | miR-3614-5p               | 1 |
| <i>circSOBP</i> | miR-3617-3p               | 1 |
| <i>circSOBP</i> | miR-3620-3p               | 1 |
| <i>circSOBP</i> | miR-3622a-5p              | 1 |
| <i>circSOBP</i> | miR-3646                  | 2 |
| <i>circSOBP</i> | miR-3653-3p               | 1 |
| <i>circSOBP</i> | miR-3654                  | 1 |
| <i>circSOBP</i> | miR-3655                  | 1 |
| <i>circSOBP</i> | miR-3658                  | 2 |
| <i>circSOBP</i> | miR-3662                  | 4 |
| <i>circSOBP</i> | miR-3664-3p               | 3 |
| <i>circSOBP</i> | miR-3664-5p               | 1 |
| <i>circSOBP</i> | miR-3667-3p               | 1 |
| <i>circSOBP</i> | miR-3671                  | 4 |
| <i>circSOBP</i> | miR-3674                  | 1 |
| <i>circSOBP</i> | miR-3678-3p               | 2 |

|                 |                           |   |
|-----------------|---------------------------|---|
| <i>circSOBP</i> | miR-3679-3p               | 1 |
| <i>circSOBP</i> | miR-3680-3p               | 1 |
| <i>circSOBP</i> | miR-3680-5p               | 1 |
| <i>circSOBP</i> | miR-3681-5p               | 1 |
| <i>circSOBP</i> | miR-3682-3p               | 1 |
| <i>circSOBP</i> | miR-3685                  | 1 |
| <i>circSOBP</i> | miR-3688-3p               | 4 |
| <i>circSOBP</i> | miR-3690                  | 1 |
| <i>circSOBP</i> | miR-3691-3p               | 1 |
| <i>circSOBP</i> | miR-3692-3p               | 1 |
| <i>circSOBP</i> | miR-371-5p                | 2 |
| <i>circSOBP</i> | miR-371a-3p               | 1 |
| <i>circSOBP</i> | miR-371b-3p               | 1 |
| <i>circSOBP</i> | miR-371b-5p/373-5p/616-5p | 2 |
| <i>circSOBP</i> | miR-372-5p                | 2 |
| <i>circSOBP</i> | miR-374b-3p               | 2 |
| <i>circSOBP</i> | miR-375                   | 2 |
| <i>circSOBP</i> | miR-376b-5p/376c-5p       | 2 |
| <i>circSOBP</i> | miR-378g                  | 3 |
| <i>circSOBP</i> | miR-378j/6839-5p          | 1 |
| <i>circSOBP</i> | miR-381-3p                | 1 |
| <i>circSOBP</i> | miR-382-3p                | 2 |
| <i>circSOBP</i> | miR-382-5p                | 1 |
| <i>circSOBP</i> | miR-383-3p                | 2 |
| <i>circSOBP</i> | miR-383-5p.2              | 1 |
| <i>circSOBP</i> | miR-384                   | 1 |
| <i>circSOBP</i> | miR-3908                  | 1 |
| <i>circSOBP</i> | miR-3914                  | 1 |
| <i>circSOBP</i> | miR-3925-3p               | 1 |
| <i>circSOBP</i> | miR-3925-5p               | 3 |
| <i>circSOBP</i> | miR-3926                  | 1 |
| <i>circSOBP</i> | miR-3928-5p/6806-3p       | 2 |
| <i>circSOBP</i> | miR-3938                  | 1 |
| <i>circSOBP</i> | miR-3941                  | 1 |
| <i>circSOBP</i> | miR-3942-5p               | 1 |
| <i>circSOBP</i> | miR-3973                  | 1 |
| <i>circSOBP</i> | miR-3974                  | 1 |
| <i>circSOBP</i> | miR-3978                  | 1 |

|                 |                       |   |
|-----------------|-----------------------|---|
| <i>circSOBP</i> | miR-410-3p            | 1 |
| <i>circSOBP</i> | miR-412-3p/6754-3p    | 1 |
| <i>circSOBP</i> | miR-425-5p            | 1 |
| <i>circSOBP</i> | miR-4252              | 1 |
| <i>circSOBP</i> | miR-4254              | 1 |
| <i>circSOBP</i> | miR-4255              | 1 |
| <i>circSOBP</i> | miR-4261              | 2 |
| <i>circSOBP</i> | miR-4263              | 1 |
| <i>circSOBP</i> | miR-4264              | 2 |
| <i>circSOBP</i> | miR-4269/6715b-5p     | 2 |
| <i>circSOBP</i> | miR-4270/4441/6754-5p | 1 |
| <i>circSOBP</i> | miR-4274              | 2 |
| <i>circSOBP</i> | miR-4275              | 2 |
| <i>circSOBP</i> | miR-4277              | 2 |
| <i>circSOBP</i> | miR-4279              | 1 |
| <i>circSOBP</i> | miR-4282              | 3 |
| <i>circSOBP</i> | miR-4290              | 1 |
| <i>circSOBP</i> | miR-4292/6791-5p      | 1 |
| <i>circSOBP</i> | miR-4301              | 2 |
| <i>circSOBP</i> | miR-4307              | 1 |
| <i>circSOBP</i> | miR-4308              | 1 |
| <i>circSOBP</i> | miR-4310/7157-5p      | 1 |
| <i>circSOBP</i> | miR-4311              | 2 |
| <i>circSOBP</i> | miR-4314              | 1 |
| <i>circSOBP</i> | miR-4315              | 1 |
| <i>circSOBP</i> | miR-432-3p            | 2 |
| <i>circSOBP</i> | miR-4328              | 2 |
| <i>circSOBP</i> | miR-433-3p            | 1 |
| <i>circSOBP</i> | miR-4422              | 3 |
| <i>circSOBP</i> | miR-4424              | 1 |
| <i>circSOBP</i> | miR-4433a-3p          | 2 |
| <i>circSOBP</i> | miR-4433a-5p          | 1 |
| <i>circSOBP</i> | miR-4433b-5p          | 1 |
| <i>circSOBP</i> | miR-4435              | 1 |
| <i>circSOBP</i> | miR-4436b-5p          | 2 |
| <i>circSOBP</i> | miR-4438              | 1 |
| <i>circSOBP</i> | miR-4446-5p           | 1 |
| <i>circSOBP</i> | miR-4459              | 2 |

|                 |                    |   |
|-----------------|--------------------|---|
| <i>circSOBP</i> | miR-4464/4748      | 1 |
| <i>circSOBP</i> | miR-4468           | 1 |
| <i>circSOBP</i> | miR-4476/6876-5p   | 1 |
| <i>circSOBP</i> | miR-4477a          | 2 |
| <i>circSOBP</i> | miR-4477b          | 1 |
| <i>circSOBP</i> | miR-4481/4745-5p   | 1 |
| <i>circSOBP</i> | miR-4486           | 3 |
| <i>circSOBP</i> | miR-4487           | 1 |
| <i>circSOBP</i> | miR-4490           | 2 |
| <i>circSOBP</i> | miR-4494           | 1 |
| <i>circSOBP</i> | miR-4495           | 2 |
| <i>circSOBP</i> | miR-4496           | 1 |
| <i>circSOBP</i> | miR-450a-1-3p      | 1 |
| <i>circSOBP</i> | miR-450b-3p/769-3p | 1 |
| <i>circSOBP</i> | miR-450b-5p        | 1 |
| <i>circSOBP</i> | miR-4511           | 1 |
| <i>circSOBP</i> | miR-4513/6855-3p   | 1 |
| <i>circSOBP</i> | miR-4514/4692      | 2 |
| <i>circSOBP</i> | miR-4519           | 2 |
| <i>circSOBP</i> | miR-452-3p         | 3 |
| <i>circSOBP</i> | miR-4521           | 2 |
| <i>circSOBP</i> | miR-4524a-3p       | 1 |
| <i>circSOBP</i> | miR-4524b-3p       | 1 |
| <i>circSOBP</i> | miR-4528           | 1 |
| <i>circSOBP</i> | miR-4529-5p        | 1 |
| <i>circSOBP</i> | miR-4530           | 1 |
| <i>circSOBP</i> | miR-4534/8082      | 3 |
| <i>circSOBP</i> | miR-4540           | 1 |
| <i>circSOBP</i> | miR-455-3p.2       | 3 |
| <i>circSOBP</i> | miR-4633-5p        | 1 |
| <i>circSOBP</i> | miR-4635           | 2 |
| <i>circSOBP</i> | miR-4637           | 1 |
| <i>circSOBP</i> | miR-4640-5p        | 1 |
| <i>circSOBP</i> | miR-4642           | 2 |
| <i>circSOBP</i> | miR-4643           | 4 |
| <i>circSOBP</i> | miR-4645-3p        | 1 |
| <i>circSOBP</i> | miR-4645-5p/4673   | 2 |
| <i>circSOBP</i> | miR-4646-3p        | 1 |

|                 |                             |   |
|-----------------|-----------------------------|---|
| <i>circSOBP</i> | miR-4650-5p                 | 2 |
| <i>circSOBP</i> | miR-4652-3p                 | 1 |
| <i>circSOBP</i> | miR-4660                    | 1 |
| <i>circSOBP</i> | miR-4666a-3p                | 1 |
| <i>circSOBP</i> | miR-4666a-5p                | 1 |
| <i>circSOBP</i> | miR-4668-3p                 | 1 |
| <i>circSOBP</i> | miR-4668-5p                 | 2 |
| <i>circSOBP</i> | miR-4670-3p                 | 1 |
| <i>circSOBP</i> | miR-4672                    | 1 |
| <i>circSOBP</i> | miR-4677-3p                 | 1 |
| <i>circSOBP</i> | miR-4679                    | 1 |
| <i>circSOBP</i> | miR-4686                    | 1 |
| <i>circSOBP</i> | miR-4687-3p                 | 1 |
| <i>circSOBP</i> | miR-4690-5p                 | 1 |
| <i>circSOBP</i> | miR-4693-3p                 | 1 |
| <i>circSOBP</i> | miR-4694-3p                 | 1 |
| <i>circSOBP</i> | miR-4694-5p                 | 1 |
| <i>circSOBP</i> | miR-4698                    | 1 |
| <i>circSOBP</i> | miR-4699-3p                 | 1 |
| <i>circSOBP</i> | miR-4704-3p                 | 1 |
| <i>circSOBP</i> | miR-4704-5p                 | 1 |
| <i>circSOBP</i> | miR-4705                    | 2 |
| <i>circSOBP</i> | miR-4709-5p                 | 1 |
| <i>circSOBP</i> | miR-4713-3p                 | 1 |
| <i>circSOBP</i> | miR-4714-5p                 | 1 |
| <i>circSOBP</i> | miR-4715-3p                 | 1 |
| <i>circSOBP</i> | miR-4717-3p                 | 2 |
| <i>circSOBP</i> | miR-4719                    | 2 |
| <i>circSOBP</i> | miR-4720-5p/4799-3p/5588-5p | 4 |
| <i>circSOBP</i> | miR-4722-3p/6727-3p         | 1 |
| <i>circSOBP</i> | miR-4722-5p                 | 1 |
| <i>circSOBP</i> | miR-4724-3p                 | 2 |
| <i>circSOBP</i> | miR-4724-5p                 | 1 |
| <i>circSOBP</i> | miR-4726-3p                 | 1 |
| <i>circSOBP</i> | miR-4727-5p                 | 2 |
| <i>circSOBP</i> | miR-4733-3p                 | 1 |
| <i>circSOBP</i> | miR-4736                    | 1 |
| <i>circSOBP</i> | miR-4738-3p                 | 2 |

|                 |                     |   |
|-----------------|---------------------|---|
| <i>circSOBP</i> | miR-4742-3p         | 3 |
| <i>circSOBP</i> | miR-4742-5p         | 2 |
| <i>circSOBP</i> | miR-4743-3p         | 1 |
| <i>circSOBP</i> | miR-4747-3p         | 1 |
| <i>circSOBP</i> | miR-4753-3p         | 1 |
| <i>circSOBP</i> | miR-4757-3p         | 1 |
| <i>circSOBP</i> | miR-4757-5p/6744-3p | 1 |
| <i>circSOBP</i> | miR-4758-3p         | 1 |
| <i>circSOBP</i> | miR-4761-5p         | 2 |
| <i>circSOBP</i> | miR-4762-5p         | 2 |
| <i>circSOBP</i> | miR-4763-5p         | 1 |
| <i>circSOBP</i> | miR-4765            | 1 |
| <i>circSOBP</i> | miR-4766-3p         | 2 |
| <i>circSOBP</i> | miR-4766-5p         | 1 |
| <i>circSOBP</i> | miR-4768-3p         | 2 |
| <i>circSOBP</i> | miR-4768-5p/6833-3p | 1 |
| <i>circSOBP</i> | miR-4771            | 1 |
| <i>circSOBP</i> | miR-4774-5p         | 2 |
| <i>circSOBP</i> | miR-4778-5p         | 1 |
| <i>circSOBP</i> | miR-4780            | 1 |
| <i>circSOBP</i> | miR-4789-3p         | 4 |
| <i>circSOBP</i> | miR-4789-5p         | 2 |
| <i>circSOBP</i> | miR-4795-3p         | 1 |
| <i>circSOBP</i> | miR-4797-3p         | 2 |
| <i>circSOBP</i> | miR-4798-3p         | 1 |
| <i>circSOBP</i> | miR-4802-3p         | 2 |
| <i>circSOBP</i> | miR-4802-5p         | 1 |
| <i>circSOBP</i> | miR-4803            | 2 |
| <i>circSOBP</i> | miR-484/3155        | 1 |
| <i>circSOBP</i> | miR-487a-5p/487b-5p | 1 |
| <i>circSOBP</i> | miR-489-3p          | 1 |
| <i>circSOBP</i> | miR-490-5p          | 3 |
| <i>circSOBP</i> | miR-493-5p          | 1 |
| <i>circSOBP</i> | miR-494-3p          | 2 |
| <i>circSOBP</i> | miR-495-5p          | 1 |
| <i>circSOBP</i> | miR-496.1           | 1 |
| <i>circSOBP</i> | miR-498             | 1 |
| <i>circSOBP</i> | miR-499a-3p/499b-3p | 2 |



|                 |                     |   |
|-----------------|---------------------|---|
| <i>circSOBP</i> | miR-499b-5p         | 1 |
| <i>circSOBP</i> | miR-5000-3p         | 1 |
| <i>circSOBP</i> | miR-5001-3p         | 2 |
| <i>circSOBP</i> | miR-5003-3p         | 2 |
| <i>circSOBP</i> | miR-5003-5p         | 1 |
| <i>circSOBP</i> | miR-5004-3p         | 2 |
| <i>circSOBP</i> | miR-5007-3p         | 2 |
| <i>circSOBP</i> | miR-500a-3p         | 1 |
| <i>circSOBP</i> | miR-500a-5p         | 1 |
| <i>circSOBP</i> | miR-500b-3p         | 1 |
| <i>circSOBP</i> | miR-501-3p/502-3p   | 1 |
| <i>circSOBP</i> | miR-5011-5p         | 1 |
| <i>circSOBP</i> | miR-506-5p          | 1 |
| <i>circSOBP</i> | miR-507/557         | 1 |
| <i>circSOBP</i> | miR-508-5p          | 1 |
| <i>circSOBP</i> | miR-5089-3p         | 2 |
| <i>circSOBP</i> | miR-5089-5p         | 1 |
| <i>circSOBP</i> | miR-5092            | 1 |
| <i>circSOBP</i> | miR-5093            | 2 |
| <i>circSOBP</i> | miR-5096            | 2 |
| <i>circSOBP</i> | miR-512-5p          | 2 |
| <i>circSOBP</i> | miR-513b-3p         | 1 |
| <i>circSOBP</i> | miR-513b-5p         | 2 |
| <i>circSOBP</i> | miR-513c-5p/514b-5p | 2 |
| <i>circSOBP</i> | miR-514a-3p         | 2 |
| <i>circSOBP</i> | miR-514a-5p         | 1 |
| <i>circSOBP</i> | miR-515-5p/519e-5p  | 1 |
| <i>circSOBP</i> | miR-5189-3p         | 1 |
| <i>circSOBP</i> | miR-518c-5p         | 3 |
| <i>circSOBP</i> | miR-5192            | 2 |
| <i>circSOBP</i> | miR-5195-5p         | 1 |
| <i>circSOBP</i> | miR-5197-3p         | 1 |
| <i>circSOBP</i> | miR-5197-5p         | 1 |
| <i>circSOBP</i> | miR-520g-3p         | 1 |
| <i>circSOBP</i> | miR-522-3p          | 1 |
| <i>circSOBP</i> | miR-526b-5p         | 2 |
| <i>circSOBP</i> | miR-539-3p          | 1 |
| <i>circSOBP</i> | miR-539-5p          | 2 |

|                 |                                                                    |   |
|-----------------|--------------------------------------------------------------------|---|
| <i>circSOBP</i> | miR-543                                                            | 2 |
| <i>circSOBP</i> | miR-544a                                                           | 1 |
| <i>circSOBP</i> | miR-545-5p                                                         | 1 |
| <i>circSOBP</i> | miR-548ao-5p/548ax                                                 | 2 |
| <i>circSOBP</i> | miR-548ap-3p/548aa/548t-3p                                         | 2 |
| <i>circSOBP</i> | miR-548as-3p                                                       | 2 |
| <i>circSOBP</i> | miR-548at-5p                                                       | 1 |
| <i>circSOBP</i> | miR-548au-3p                                                       | 1 |
| <i>circSOBP</i> | miR-548av-5p/548k/8054                                             | 1 |
| <i>circSOBP</i> | miR-548ay-3p/548at-3p                                              | 2 |
| <i>circSOBP</i> | miR-548ay-5p/548au-5p/548as-5p/548ar-5p/548aq-5p/548ap-5p/548am-5p | 2 |
| <i>circSOBP</i> | miR-548az-3p/548ar-3p/548a-3p/548e-3p/548f-3p                      | 2 |
| <i>circSOBP</i> | miR-548az-5p/548t-5p                                               | 1 |
| <i>circSOBP</i> | miR-548b-3p                                                        | 1 |
| <i>circSOBP</i> | miR-548c-3p                                                        | 3 |
| <i>circSOBP</i> | miR-548l                                                           | 1 |
| <i>circSOBP</i> | miR-548n                                                           | 1 |
| <i>circSOBP</i> | miR-548s                                                           | 1 |
| <i>circSOBP</i> | miR-548v                                                           | 1 |
| <i>circSOBP</i> | miR-550a-3-5p/550a-5p/1271-3p                                      | 2 |
| <i>circSOBP</i> | miR-550b-2-5p                                                      | 1 |
| <i>circSOBP</i> | miR-551b-5p                                                        | 2 |
| <i>circSOBP</i> | miR-556-5p                                                         | 1 |
| <i>circSOBP</i> | miR-5571-3p                                                        | 1 |
| <i>circSOBP</i> | miR-5571-5p                                                        | 1 |
| <i>circSOBP</i> | miR-558                                                            | 1 |
| <i>circSOBP</i> | miR-5580-3p                                                        | 2 |
| <i>circSOBP</i> | miR-5580-5p                                                        | 1 |
| <i>circSOBP</i> | miR-5581-3p                                                        | 1 |
| <i>circSOBP</i> | miR-5582-3p                                                        | 2 |
| <i>circSOBP</i> | miR-5582-5p                                                        | 1 |
| <i>circSOBP</i> | miR-5584-3p                                                        | 4 |
| <i>circSOBP</i> | miR-5584-5p                                                        | 2 |
| <i>circSOBP</i> | miR-5585-5p                                                        | 2 |
| <i>circSOBP</i> | miR-5586-3p                                                        | 2 |
| <i>circSOBP</i> | miR-5586-5p                                                        | 2 |
| <i>circSOBP</i> | miR-5589-3p                                                        | 2 |
| <i>circSOBP</i> | miR-561-3p                                                         | 1 |

|                 |                                       |   |
|-----------------|---------------------------------------|---|
| <i>circSOBP</i> | miR-561-5p                            | 3 |
| <i>circSOBP</i> | miR-562                               | 1 |
| <i>circSOBP</i> | miR-568                               | 2 |
| <i>circSOBP</i> | miR-5682                              | 2 |
| <i>circSOBP</i> | miR-5683                              | 2 |
| <i>circSOBP</i> | miR-5687                              | 2 |
| <i>circSOBP</i> | miR-5690                              | 1 |
| <i>circSOBP</i> | miR-5691                              | 1 |
| <i>circSOBP</i> | miR-5694                              | 1 |
| <i>circSOBP</i> | miR-5696                              | 2 |
| <i>circSOBP</i> | miR-5697                              | 1 |
| <i>circSOBP</i> | miR-5699-5p                           | 1 |
| <i>circSOBP</i> | miR-5700                              | 2 |
| <i>circSOBP</i> | miR-5708                              | 1 |
| <i>circSOBP</i> | miR-573/3616-5p                       | 1 |
| <i>circSOBP</i> | miR-576-5p                            | 1 |
| <i>circSOBP</i> | miR-578                               | 3 |
| <i>circSOBP</i> | miR-579-3p                            | 2 |
| <i>circSOBP</i> | miR-580-5p                            | 3 |
| <i>circSOBP</i> | miR-582-3p                            | 1 |
| <i>circSOBP</i> | miR-583                               | 2 |
| <i>circSOBP</i> | miR-585-5p                            | 2 |
| <i>circSOBP</i> | miR-587                               | 2 |
| <i>circSOBP</i> | miR-588                               | 1 |
| <i>circSOBP</i> | miR-593-5p                            | 1 |
| <i>circSOBP</i> | miR-597-3p                            | 1 |
| <i>circSOBP</i> | miR-603                               | 1 |
| <i>circSOBP</i> | miR-604                               | 1 |
| <i>circSOBP</i> | miR-605-5p                            | 1 |
| <i>circSOBP</i> | miR-606                               | 1 |
| <i>circSOBP</i> | miR-6069                              | 1 |
| <i>circSOBP</i> | miR-607                               | 3 |
| <i>circSOBP</i> | miR-6071                              | 1 |
| <i>circSOBP</i> | miR-6072/6891-3p                      | 2 |
| <i>circSOBP</i> | miR-6077                              | 2 |
| <i>circSOBP</i> | miR-6079                              | 3 |
| <i>circSOBP</i> | miR-612/1285-3p/3187-5p/5189-5p/68603 | 3 |
| <i>circSOBP</i> | miR-6128                              | 1 |

|                 |                  |   |
|-----------------|------------------|---|
| <i>circSOBP</i> | miR-6165         | 1 |
| <i>circSOBP</i> | miR-617          | 1 |
| <i>circSOBP</i> | miR-618          | 1 |
| <i>circSOBP</i> | miR-622          | 1 |
| <i>circSOBP</i> | miR-624-3p       | 1 |
| <i>circSOBP</i> | miR-624-5p       | 1 |
| <i>circSOBP</i> | miR-625-3p       | 1 |
| <i>circSOBP</i> | miR-627-3p       | 2 |
| <i>circSOBP</i> | miR-629-3p       | 1 |
| <i>circSOBP</i> | miR-630          | 1 |
| <i>circSOBP</i> | miR-635/6774-5p  | 1 |
| <i>circSOBP</i> | miR-638          | 1 |
| <i>circSOBP</i> | miR-639          | 1 |
| <i>circSOBP</i> | miR-641/3617-5p  | 2 |
| <i>circSOBP</i> | miR-642-3p       | 1 |
| <i>circSOBP</i> | miR-642b-5p      | 1 |
| <i>circSOBP</i> | miR-643          | 1 |
| <i>circSOBP</i> | miR-647          | 2 |
| <i>circSOBP</i> | miR-6500-3p      | 1 |
| <i>circSOBP</i> | miR-6501-3p      | 1 |
| <i>circSOBP</i> | miR-6504-3p      | 1 |
| <i>circSOBP</i> | miR-6505-3p      | 1 |
| <i>circSOBP</i> | miR-6508-3p      | 1 |
| <i>circSOBP</i> | miR-6508-5p/8067 | 2 |
| <i>circSOBP</i> | miR-6509-3p      | 2 |
| <i>circSOBP</i> | miR-651-3p       | 3 |
| <i>circSOBP</i> | miR-6510-5p      | 1 |
| <i>circSOBP</i> | miR-6512-5p      | 1 |
| <i>circSOBP</i> | miR-6513-5p      | 1 |
| <i>circSOBP</i> | miR-6514-3p      | 1 |
| <i>circSOBP</i> | miR-6514-5p      | 1 |
| <i>circSOBP</i> | miR-6516-3p      | 1 |
| <i>circSOBP</i> | miR-6516-5p      | 1 |
| <i>circSOBP</i> | miR-652-5p       | 2 |
| <i>circSOBP</i> | miR-653-5p       | 1 |
| <i>circSOBP</i> | miR-656-3p       | 1 |
| <i>circSOBP</i> | miR-660-5p       | 1 |
| <i>circSOBP</i> | miR-664a-5p/4794 | 2 |

|                 |                     |   |
|-----------------|---------------------|---|
| <i>circSOBP</i> | miR-671-5p          | 1 |
| <i>circSOBP</i> | miR-6715b-3p        | 1 |
| <i>circSOBP</i> | miR-6716-5p         | 1 |
| <i>circSOBP</i> | miR-6723-5p         | 1 |
| <i>circSOBP</i> | miR-6724-5p/6773-5p | 3 |
| <i>circSOBP</i> | miR-6728-3p         | 1 |
| <i>circSOBP</i> | miR-6728-5p         | 1 |
| <i>circSOBP</i> | miR-6732-3p         | 1 |
| <i>circSOBP</i> | miR-6734-3p         | 1 |
| <i>circSOBP</i> | miR-6736-3p         | 1 |
| <i>circSOBP</i> | miR-6738-3p         | 1 |
| <i>circSOBP</i> | miR-6739-3p         | 1 |
| <i>circSOBP</i> | miR-6740-3p         | 1 |
| <i>circSOBP</i> | miR-6744-5p         | 1 |
| <i>circSOBP</i> | miR-6747-3p         | 1 |
| <i>circSOBP</i> | miR-6750-5p/6822-5p | 2 |
| <i>circSOBP</i> | miR-6753-5p         | 1 |
| <i>circSOBP</i> | miR-676-5p          | 1 |
| <i>circSOBP</i> | miR-6762-3p         | 1 |
| <i>circSOBP</i> | miR-6764-3p/6824-3p | 3 |
| <i>circSOBP</i> | miR-6770-5p         | 1 |
| <i>circSOBP</i> | miR-6776-3p         | 3 |
| <i>circSOBP</i> | miR-6777-3p         | 1 |
| <i>circSOBP</i> | miR-6780b-3p        | 1 |
| <i>circSOBP</i> | miR-6782-3p         | 1 |
| <i>circSOBP</i> | miR-6795-3p         | 1 |
| <i>circSOBP</i> | miR-6798-3p         | 1 |
| <i>circSOBP</i> | miR-6804-3p         | 1 |
| <i>circSOBP</i> | miR-6806-5p         | 1 |
| <i>circSOBP</i> | miR-6807-5p         | 1 |
| <i>circSOBP</i> | miR-6809-3p         | 1 |
| <i>circSOBP</i> | miR-6813-3p         | 1 |
| <i>circSOBP</i> | miR-6814-5p         | 1 |
| <i>circSOBP</i> | miR-6826-3p         | 1 |
| <i>circSOBP</i> | miR-6827-5p         | 1 |
| <i>circSOBP</i> | miR-6828-3p         | 1 |
| <i>circSOBP</i> | miR-6828-5p         | 1 |
| <i>circSOBP</i> | miR-6837-3p         | 1 |

|                 |             |   |
|-----------------|-------------|---|
| <i>circSOBP</i> | miR-6838-3p | 1 |
| <i>circSOBP</i> | miR-6840-3p | 1 |
| <i>circSOBP</i> | miR-6842-3p | 2 |
| <i>circSOBP</i> | miR-6857-3p | 1 |
| <i>circSOBP</i> | miR-6868-5p | 4 |
| <i>circSOBP</i> | miR-6870-3p | 1 |
| <i>circSOBP</i> | miR-6871-5p | 1 |
| <i>circSOBP</i> | miR-6872-3p | 1 |
| <i>circSOBP</i> | miR-6874-5p | 1 |
| <i>circSOBP</i> | miR-6882-5p | 2 |
| <i>circSOBP</i> | miR-6885-3p | 2 |
| <i>circSOBP</i> | miR-6886-3p | 1 |
| <i>circSOBP</i> | miR-6887-3p | 1 |
| <i>circSOBP</i> | miR-6888-5p | 3 |
| <i>circSOBP</i> | miR-6892-3p | 2 |
| <i>circSOBP</i> | miR-6894-3p | 1 |
| <i>circSOBP</i> | miR-7-3p    | 1 |
| <i>circSOBP</i> | miR-7-5p    | 2 |
| <i>circSOBP</i> | miR-708-3p  | 1 |
| <i>circSOBP</i> | miR-711     | 1 |
| <i>circSOBP</i> | miR-7150    | 2 |
| <i>circSOBP</i> | miR-7153-3p | 1 |
| <i>circSOBP</i> | miR-7154-5p | 1 |
| <i>circSOBP</i> | miR-7156-3p | 2 |
| <i>circSOBP</i> | miR-7158-5p | 1 |
| <i>circSOBP</i> | miR-766-3p  | 1 |
| <i>circSOBP</i> | miR-767-5p  | 1 |
| <i>circSOBP</i> | miR-770-5p  | 1 |
| <i>circSOBP</i> | miR-7844-5p | 3 |
| <i>circSOBP</i> | miR-7848-3p | 2 |
| <i>circSOBP</i> | miR-7849-3p | 1 |
| <i>circSOBP</i> | miR-7850-5p | 2 |
| <i>circSOBP</i> | miR-7856-5p | 1 |
| <i>circSOBP</i> | miR-7974    | 1 |
| <i>circSOBP</i> | miR-7975    | 1 |
| <i>circSOBP</i> | miR-802     | 1 |
| <i>circSOBP</i> | miR-8060    | 1 |
| <i>circSOBP</i> | miR-8062    | 1 |

|                   |                     |   |
|-------------------|---------------------|---|
| <i>circSOBP</i>   | miR-8063            | 1 |
| <i>circSOBP</i>   | miR-8078            | 1 |
| <i>circSOBP</i>   | miR-8081            | 1 |
| <i>circSOBP</i>   | miR-8084            | 2 |
| <i>circSOBP</i>   | miR-8485            | 1 |
| <i>circSOBP</i>   | miR-873-5p.2        | 1 |
| <i>circSOBP</i>   | miR-874-3p          | 1 |
| <i>circSOBP</i>   | miR-875-3p          | 2 |
| <i>circSOBP</i>   | miR-876-5p          | 2 |
| <i>circSOBP</i>   | miR-887-5p          | 1 |
| <i>circSOBP</i>   | miR-888-3p          | 1 |
| <i>circSOBP</i>   | miR-891b            | 3 |
| <i>circSOBP</i>   | miR-892-5p          | 1 |
| <i>circSOBP</i>   | miR-892b            | 1 |
| <i>circSOBP</i>   | miR-9-3p            | 2 |
| <i>circSOBP</i>   | miR-936             | 1 |
| <i>circSOBP</i>   | miR-938             | 1 |
| <i>circSOBP</i>   | miR-942-5p          | 1 |
| <i>circSOBP</i>   | miR-943             | 2 |
| <i>circSOBP</i>   | miR-944             | 2 |
| <i>circSOBP</i>   | miR-9500            | 2 |
| <i>circSOBP</i>   | miR-96-3p           | 1 |
| <i>circSORBS1</i> | let-7-5p/98-5p      | 2 |
| <i>circSORBS1</i> | miR-10-5p           | 1 |
| <i>circSORBS1</i> | miR-100-3p          | 2 |
| <i>circSORBS1</i> | miR-101-3p.1        | 1 |
| <i>circSORBS1</i> | miR-101-5p          | 2 |
| <i>circSORBS1</i> | miR-1180-3p         | 1 |
| <i>circSORBS1</i> | miR-1184            | 1 |
| <i>circSORBS1</i> | miR-1185-5p         | 1 |
| <i>circSORBS1</i> | miR-1193            | 1 |
| <i>circSORBS1</i> | miR-1197            | 1 |
| <i>circSORBS1</i> | miR-1199-5p/6751-3p | 1 |
| <i>circSORBS1</i> | miR-1200            | 4 |
| <i>circSORBS1</i> | miR-1202/3972       | 2 |
| <i>circSORBS1</i> | miR-1203            | 4 |
| <i>circSORBS1</i> | miR-1204            | 2 |
| <i>circSORBS1</i> | miR-1205            | 1 |

|                   |                     |   |
|-------------------|---------------------|---|
| <i>circSORBS1</i> | miR-1207-3p         | 1 |
| <i>circSORBS1</i> | miR-1224-3p         | 4 |
| <i>circSORBS1</i> | miR-1226-3p         | 1 |
| <i>circSORBS1</i> | miR-1227-5p         | 2 |
| <i>circSORBS1</i> | miR-1229-3p         | 2 |
| <i>circSORBS1</i> | miR-1233-3p         | 2 |
| <i>circSORBS1</i> | miR-1233-5p/6778-5p | 1 |
| <i>circSORBS1</i> | miR-1234-3p/7107-5p | 1 |
| <i>circSORBS1</i> | miR-1236-3p         | 1 |
| <i>circSORBS1</i> | miR-1237-3p         | 4 |
| <i>circSORBS1</i> | miR-1238-3p         | 2 |
| <i>circSORBS1</i> | miR-1238-5p/4758-5p | 1 |
| <i>circSORBS1</i> | miR-124-3p.1        | 3 |
| <i>circSORBS1</i> | miR-1245b-3p        | 2 |
| <i>circSORBS1</i> | miR-1246            | 2 |
| <i>circSORBS1</i> | miR-1248            | 4 |
| <i>circSORBS1</i> | miR-1249-3p         | 1 |
| <i>circSORBS1</i> | miR-125-5p          | 1 |
| <i>circSORBS1</i> | miR-1251-3p         | 1 |
| <i>circSORBS1</i> | miR-1251-5p         | 1 |
| <i>circSORBS1</i> | miR-1252-3p         | 1 |
| <i>circSORBS1</i> | miR-1253            | 1 |
| <i>circSORBS1</i> | miR-1254/3116       | 1 |
| <i>circSORBS1</i> | miR-1255a/1255b-5p  | 2 |
| <i>circSORBS1</i> | miR-1257            | 1 |
| <i>circSORBS1</i> | miR-125b-1-3p       | 3 |
| <i>circSORBS1</i> | miR-125b-2-3p       | 3 |
| <i>circSORBS1</i> | miR-1260a/1260b     | 2 |
| <i>circSORBS1</i> | miR-1263            | 1 |
| <i>circSORBS1</i> | miR-1265            | 2 |
| <i>circSORBS1</i> | miR-1266-3p         | 1 |
| <i>circSORBS1</i> | miR-1266-5p/4518    | 4 |
| <i>circSORBS1</i> | miR-1273d           | 3 |
| <i>circSORBS1</i> | miR-1273e           | 1 |
| <i>circSORBS1</i> | miR-1273h-3p        | 1 |
| <i>circSORBS1</i> | miR-1276            | 1 |
| <i>circSORBS1</i> | miR-128-1-5p        | 2 |
| <i>circSORBS1</i> | miR-1281            | 3 |



|                   |                          |   |
|-------------------|--------------------------|---|
| <i>circSORBS1</i> | miR-1286                 | 1 |
| <i>circSORBS1</i> | miR-1287-5p              | 1 |
| <i>circSORBS1</i> | miR-1288-5p              | 1 |
| <i>circSORBS1</i> | miR-129-3p               | 4 |
| <i>circSORBS1</i> | miR-1292-3p              | 2 |
| <i>circSORBS1</i> | miR-1293/4483            | 1 |
| <i>circSORBS1</i> | miR-1295a                | 2 |
| <i>circSORBS1</i> | miR-1295b-5p/1912        | 1 |
| <i>circSORBS1</i> | miR-1296-3p              | 2 |
| <i>circSORBS1</i> | miR-1298-5p              | 1 |
| <i>circSORBS1</i> | miR-1299                 | 1 |
| <i>circSORBS1</i> | miR-130-3p/301-3p/454-3p | 2 |
| <i>circSORBS1</i> | miR-1301-3p              | 5 |
| <i>circSORBS1</i> | miR-1301-5p/6502-5p      | 1 |
| <i>circSORBS1</i> | miR-1303                 | 1 |
| <i>circSORBS1</i> | miR-1306-5p              | 5 |
| <i>circSORBS1</i> | miR-1307-3p              | 1 |
| <i>circSORBS1</i> | miR-132-5p               | 2 |
| <i>circSORBS1</i> | miR-1324                 | 2 |
| <i>circSORBS1</i> | miR-133a-3p.1            | 2 |
| <i>circSORBS1</i> | miR-133a-5p              | 2 |
| <i>circSORBS1</i> | miR-134-5p               | 1 |
| <i>circSORBS1</i> | miR-1343-3p              | 1 |
| <i>circSORBS1</i> | miR-138-1-3p             | 1 |
| <i>circSORBS1</i> | miR-138-5p               | 2 |
| <i>circSORBS1</i> | miR-139-5p               | 2 |
| <i>circSORBS1</i> | miR-140-3p.1             | 2 |
| <i>circSORBS1</i> | miR-140-3p.2             | 3 |
| <i>circSORBS1</i> | miR-141-3p/200-3p        | 1 |
| <i>circSORBS1</i> | miR-141-5p               | 3 |
| <i>circSORBS1</i> | miR-144-3p               | 1 |
| <i>circSORBS1</i> | miR-145-3p               | 2 |
| <i>circSORBS1</i> | miR-145-5p               | 4 |
| <i>circSORBS1</i> | miR-1468-3p              | 1 |
| <i>circSORBS1</i> | miR-146b-3p              | 3 |
| <i>circSORBS1</i> | miR-1470                 | 6 |
| <i>circSORBS1</i> | miR-1471                 | 2 |
| <i>circSORBS1</i> | miR-148-3p/152-3p        | 4 |

|                   |                                      |   |
|-------------------|--------------------------------------|---|
| <i>circSORBS1</i> | miR-148a-5p                          | 2 |
| <i>circSORBS1</i> | miR-149-5p                           | 2 |
| <i>circSORBS1</i> | miR-15-5p/16-5p/195-5p/424-5p/497-5p | 2 |
| <i>circSORBS1</i> | miR-150-3p                           | 1 |
| <i>circSORBS1</i> | miR-150-5p                           | 3 |
| <i>circSORBS1</i> | miR-151-5p                           | 1 |
| <i>circSORBS1</i> | miR-152-5p                           | 1 |
| <i>circSORBS1</i> | miR-1537-3p                          | 2 |
| <i>circSORBS1</i> | miR-1539                             | 1 |
| <i>circSORBS1</i> | miR-154-3p/487-3p                    | 1 |
| <i>circSORBS1</i> | miR-155-3p                           | 2 |
| <i>circSORBS1</i> | miR-17-3p                            | 1 |
| <i>circSORBS1</i> | miR-17-5p/20-5p/93-5p/106-5p/519-3p  | 1 |
| <i>circSORBS1</i> | miR-18-5p                            | 1 |
| <i>circSORBS1</i> | miR-182-3p                           | 1 |
| <i>circSORBS1</i> | miR-1825                             | 4 |
| <i>circSORBS1</i> | miR-1827                             | 1 |
| <i>circSORBS1</i> | miR-183-5p.1                         | 1 |
| <i>circSORBS1</i> | miR-185-3p                           | 2 |
| <i>circSORBS1</i> | miR-185-5p                           | 1 |
| <i>circSORBS1</i> | miR-186-5p                           | 3 |
| <i>circSORBS1</i> | miR-187-5p                           | 1 |
| <i>circSORBS1</i> | miR-188-3p                           | 2 |
| <i>circSORBS1</i> | miR-188-5p                           | 1 |
| <i>circSORBS1</i> | miR-18a-3p                           | 2 |
| <i>circSORBS1</i> | miR-1908-5p                          | 1 |
| <i>circSORBS1</i> | miR-1910-3p/6511a-5p                 | 1 |
| <i>circSORBS1</i> | miR-1910-5p                          | 2 |
| <i>circSORBS1</i> | miR-1911-5p                          | 2 |
| <i>circSORBS1</i> | miR-1914-5p                          | 2 |
| <i>circSORBS1</i> | miR-1915-3p/6764-5p                  | 2 |
| <i>circSORBS1</i> | miR-1915-5p                          | 1 |
| <i>circSORBS1</i> | miR-192-3p                           | 2 |
| <i>circSORBS1</i> | miR-192-5p/215-5p                    | 3 |
| <i>circSORBS1</i> | miR-193a-5p                          | 1 |
| <i>circSORBS1</i> | miR-196a-3p                          | 1 |
| <i>circSORBS1</i> | miR-196b-3p                          | 1 |
| <i>circSORBS1</i> | miR-197-3p                           | 3 |

|                   |                    |   |
|-------------------|--------------------|---|
| <i>circSORBS1</i> | miR-1976           | 6 |
| <i>circSORBS1</i> | miR-199-3p         | 4 |
| <i>circSORBS1</i> | miR-199-5p         | 4 |
| <i>circSORBS1</i> | miR-200-3p/429     | 2 |
| <i>circSORBS1</i> | miR-200ab-5p       | 3 |
| <i>circSORBS1</i> | miR-202-5p         | 1 |
| <i>circSORBS1</i> | miR-203a-3p.1      | 1 |
| <i>circSORBS1</i> | miR-203b-3p        | 1 |
| <i>circSORBS1</i> | miR-204-3p/4646-5p | 2 |
| <i>circSORBS1</i> | miR-204-5p/211-5p  | 2 |
| <i>circSORBS1</i> | miR-205-3p         | 1 |
| <i>circSORBS1</i> | miR-205-5p         | 1 |
| <i>circSORBS1</i> | miR-2054           | 1 |
| <i>circSORBS1</i> | miR-21-3p/3591-3p  | 2 |
| <i>circSORBS1</i> | miR-21-5p/590-5p   | 1 |
| <i>circSORBS1</i> | miR-211-3p         | 1 |
| <i>circSORBS1</i> | miR-2110           | 2 |
| <i>circSORBS1</i> | miR-2114-3p        | 3 |
| <i>circSORBS1</i> | miR-2114-5p        | 2 |
| <i>circSORBS1</i> | miR-2115-5p        | 1 |
| <i>circSORBS1</i> | miR-2116-3p        | 3 |
| <i>circSORBS1</i> | miR-2117           | 1 |
| <i>circSORBS1</i> | miR-212-5p         | 1 |
| <i>circSORBS1</i> | miR-214-3p/3619-5p | 4 |
| <i>circSORBS1</i> | miR-218-1-3p       | 1 |
| <i>circSORBS1</i> | miR-218-2-3p       | 1 |
| <i>circSORBS1</i> | miR-218-5p         | 3 |
| <i>circSORBS1</i> | miR-219-5p         | 1 |
| <i>circSORBS1</i> | miR-219a-1-3p      | 1 |
| <i>circSORBS1</i> | miR-219a-2-3p      | 1 |
| <i>circSORBS1</i> | miR-219b-3p        | 1 |
| <i>circSORBS1</i> | miR-221-3p/222-3p  | 1 |
| <i>circSORBS1</i> | miR-221-5p/8073    | 3 |
| <i>circSORBS1</i> | miR-222-5p         | 2 |
| <i>circSORBS1</i> | miR-2276-5p        | 4 |
| <i>circSORBS1</i> | miR-2277-3p        | 1 |
| <i>circSORBS1</i> | miR-2278           | 5 |
| <i>circSORBS1</i> | miR-23-5p          | 1 |

|                   |                                              |   |
|-------------------|----------------------------------------------|---|
| <i>circSORBS1</i> | miR-2355-3p                                  | 2 |
| <i>circSORBS1</i> | miR-2355-5p                                  | 2 |
| <i>circSORBS1</i> | miR-2392                                     | 1 |
| <i>circSORBS1</i> | miR-2467-3p                                  | 3 |
| <i>circSORBS1</i> | miR-2467-5p                                  | 2 |
| <i>circSORBS1</i> | miR-26-3p                                    | 2 |
| <i>circSORBS1</i> | miR-2682-3p/6781-3p                          | 5 |
| <i>circSORBS1</i> | miR-27-3p                                    | 2 |
| <i>circSORBS1</i> | miR-27a-5p                                   | 1 |
| <i>circSORBS1</i> | miR-27b-5p                                   | 1 |
| <i>circSORBS1</i> | miR-28-5p/708-5p                             | 1 |
| <i>circSORBS1</i> | miR-2861                                     | 3 |
| <i>circSORBS1</i> | miR-29-3p                                    | 2 |
| <i>circSORBS1</i> | miR-298                                      | 1 |
| <i>circSORBS1</i> | miR-29a-5p                                   | 1 |
| <i>circSORBS1</i> | miR-30-3p                                    | 1 |
| <i>circSORBS1</i> | miR-301a-5p/301b-5p                          | 3 |
| <i>circSORBS1</i> | miR-302-3p/372-3p/373-3p/520-3p              | 1 |
| <i>circSORBS1</i> | miR-302c-3p.2/520-3p                         | 3 |
| <i>circSORBS1</i> | miR-3065-3p                                  | 1 |
| <i>circSORBS1</i> | miR-3074-5p                                  | 2 |
| <i>circSORBS1</i> | miR-30b-3p/1273h-5p/3689-3p/6779-5p/6780a-5p |   |
| <i>circSORBS1</i> | miR-30c-3p/6788-5p                           | 1 |
| <i>circSORBS1</i> | miR-31-3p                                    | 1 |
| <i>circSORBS1</i> | miR-31-5p                                    | 3 |
| <i>circSORBS1</i> | miR-3115                                     | 1 |
| <i>circSORBS1</i> | miR-3119                                     | 1 |
| <i>circSORBS1</i> | miR-3120-3p                                  | 2 |
| <i>circSORBS1</i> | miR-3120-5p                                  | 1 |
| <i>circSORBS1</i> | miR-3121-5p                                  | 2 |
| <i>circSORBS1</i> | miR-3122/3913-5p                             | 1 |
| <i>circSORBS1</i> | miR-3123                                     | 3 |
| <i>circSORBS1</i> | miR-3124-3p                                  | 1 |
| <i>circSORBS1</i> | miR-3128                                     | 2 |
| <i>circSORBS1</i> | miR-3130-3p                                  | 1 |
| <i>circSORBS1</i> | miR-3130-5p/4482-5p                          | 1 |
| <i>circSORBS1</i> | miR-3133                                     | 3 |
| <i>circSORBS1</i> | miR-3135b                                    | 1 |

|                   |                           |   |
|-------------------|---------------------------|---|
| <i>circSORBS1</i> | miR-3140-5p               | 3 |
| <i>circSORBS1</i> | miR-3143                  | 1 |
| <i>circSORBS1</i> | miR-3144-5p               | 2 |
| <i>circSORBS1</i> | miR-3145-5p               | 1 |
| <i>circSORBS1</i> | miR-3147                  | 1 |
| <i>circSORBS1</i> | miR-3148                  | 3 |
| <i>circSORBS1</i> | miR-3150a-3p              | 2 |
| <i>circSORBS1</i> | miR-3151-3p               | 2 |
| <i>circSORBS1</i> | miR-3152-5p               | 1 |
| <i>circSORBS1</i> | miR-3153/6733-5p/6739-5p  | 2 |
| <i>circSORBS1</i> | miR-3154                  | 3 |
| <i>circSORBS1</i> | miR-3156-3p               | 2 |
| <i>circSORBS1</i> | miR-3157-3p               | 1 |
| <i>circSORBS1</i> | miR-3158-3p               | 2 |
| <i>circSORBS1</i> | miR-3158-5p               | 1 |
| <i>circSORBS1</i> | miR-3159                  | 2 |
| <i>circSORBS1</i> | miR-3160-3p               | 2 |
| <i>circSORBS1</i> | miR-3160-5p               | 1 |
| <i>circSORBS1</i> | miR-3161                  | 1 |
| <i>circSORBS1</i> | miR-3162-3p               | 1 |
| <i>circSORBS1</i> | miR-3164                  | 1 |
| <i>circSORBS1</i> | miR-3166                  | 1 |
| <i>circSORBS1</i> | miR-3169                  | 2 |
| <i>circSORBS1</i> | miR-3173-5p               | 3 |
| <i>circSORBS1</i> | miR-3179                  | 1 |
| <i>circSORBS1</i> | miR-3180-5p               | 2 |
| <i>circSORBS1</i> | miR-3182                  | 1 |
| <i>circSORBS1</i> | miR-3183/4723-3p/6769b-3p | 4 |
| <i>circSORBS1</i> | miR-3185                  | 1 |
| <i>circSORBS1</i> | miR-3188                  | 2 |
| <i>circSORBS1</i> | miR-3189-3p               | 1 |
| <i>circSORBS1</i> | miR-3189-5p               | 2 |
| <i>circSORBS1</i> | miR-3191-3p               | 2 |
| <i>circSORBS1</i> | miR-3191-5p               | 1 |
| <i>circSORBS1</i> | miR-3192-3p               | 3 |
| <i>circSORBS1</i> | miR-3192-5p               | 2 |
| <i>circSORBS1</i> | miR-3193                  | 2 |
| <i>circSORBS1</i> | miR-3194-5p               | 4 |

|                   |                       |   |
|-------------------|-----------------------|---|
| <i>circSORBS1</i> | miR-3199/8052         | 2 |
| <i>circSORBS1</i> | miR-320               | 1 |
| <i>circSORBS1</i> | miR-3200-3p           | 1 |
| <i>circSORBS1</i> | miR-3200-5p           | 1 |
| <i>circSORBS1</i> | miR-3202              | 1 |
| <i>circSORBS1</i> | miR-320e              | 1 |
| <i>circSORBS1</i> | miR-323a-5p           | 1 |
| <i>circSORBS1</i> | miR-323b-3p           | 1 |
| <i>circSORBS1</i> | miR-324-3p/1913       | 2 |
| <i>circSORBS1</i> | miR-324-5p            | 2 |
| <i>circSORBS1</i> | miR-326               | 4 |
| <i>circSORBS1</i> | miR-328-3p            | 2 |
| <i>circSORBS1</i> | miR-330-3p            | 1 |
| <i>circSORBS1</i> | miR-331-3p            | 2 |
| <i>circSORBS1</i> | miR-335-5p            | 1 |
| <i>circSORBS1</i> | miR-337-5p            | 1 |
| <i>circSORBS1</i> | miR-338-3p            | 2 |
| <i>circSORBS1</i> | miR-338-5p            | 1 |
| <i>circSORBS1</i> | miR-34-5p/449-5p      | 2 |
| <i>circSORBS1</i> | miR-342-3p            | 2 |
| <i>circSORBS1</i> | miR-345-3p            | 3 |
| <i>circSORBS1</i> | miR-34b-5p/449c-5p    | 1 |
| <i>circSORBS1</i> | miR-3605-5p           | 1 |
| <i>circSORBS1</i> | miR-3607-3p           | 1 |
| <i>circSORBS1</i> | miR-361-3p            | 5 |
| <i>circSORBS1</i> | miR-3612              | 2 |
| <i>circSORBS1</i> | miR-3613-3p           | 2 |
| <i>circSORBS1</i> | miR-3613-5p           | 1 |
| <i>circSORBS1</i> | miR-3614-3p           | 5 |
| <i>circSORBS1</i> | miR-3615              | 1 |
| <i>circSORBS1</i> | miR-3616-3p           | 2 |
| <i>circSORBS1</i> | miR-362-5p/500b-5p    | 2 |
| <i>circSORBS1</i> | miR-3621              | 1 |
| <i>circSORBS1</i> | miR-3622a-3p/3622b-3p | 3 |
| <i>circSORBS1</i> | miR-3622a-5p          | 3 |
| <i>circSORBS1</i> | miR-363-5p/6745       | 1 |
| <i>circSORBS1</i> | miR-3646              | 1 |
| <i>circSORBS1</i> | miR-365-3p            | 1 |

|                   |                           |   |
|-------------------|---------------------------|---|
| <i>circSORBS1</i> | miR-3650                  | 2 |
| <i>circSORBS1</i> | miR-3653-3p               | 1 |
| <i>circSORBS1</i> | miR-3653-5p               | 6 |
| <i>circSORBS1</i> | miR-3655                  | 1 |
| <i>circSORBS1</i> | miR-3656                  | 1 |
| <i>circSORBS1</i> | miR-3659                  | 1 |
| <i>circSORBS1</i> | miR-365a-5p/365b-5p       | 2 |
| <i>circSORBS1</i> | miR-3660/4526             | 3 |
| <i>circSORBS1</i> | miR-3663-3p               | 2 |
| <i>circSORBS1</i> | miR-3663-5p               | 2 |
| <i>circSORBS1</i> | miR-3664-3p               | 4 |
| <i>circSORBS1</i> | miR-3667-3p               | 4 |
| <i>circSORBS1</i> | miR-3670                  | 2 |
| <i>circSORBS1</i> | miR-3672/6864-3p          | 2 |
| <i>circSORBS1</i> | miR-3675-3p               | 1 |
| <i>circSORBS1</i> | miR-3678-3p               | 1 |
| <i>circSORBS1</i> | miR-3679-3p               | 2 |
| <i>circSORBS1</i> | miR-3680-3p               | 3 |
| <i>circSORBS1</i> | miR-3680-5p               | 1 |
| <i>circSORBS1</i> | miR-3681-5p               | 1 |
| <i>circSORBS1</i> | miR-3682-3p               | 1 |
| <i>circSORBS1</i> | miR-3685                  | 1 |
| <i>circSORBS1</i> | miR-3687/4442             | 1 |
| <i>circSORBS1</i> | miR-3688-3p               | 1 |
| <i>circSORBS1</i> | miR-3689d/6851-5p         | 2 |
| <i>circSORBS1</i> | miR-3691-3p               | 1 |
| <i>circSORBS1</i> | miR-370-3p                | 2 |
| <i>circSORBS1</i> | miR-371-5p                | 1 |
| <i>circSORBS1</i> | miR-3714                  | 3 |
| <i>circSORBS1</i> | miR-371b-5p/373-5p/616-5p | 1 |
| <i>circSORBS1</i> | miR-372-5p                | 1 |
| <i>circSORBS1</i> | miR-374-5p/655-3p         | 2 |
| <i>circSORBS1</i> | miR-374a-3p               | 1 |
| <i>circSORBS1</i> | miR-374b-3p               | 1 |
| <i>circSORBS1</i> | miR-376c-3p               | 1 |
| <i>circSORBS1</i> | miR-378a-5p               | 4 |
| <i>circSORBS1</i> | miR-378j/6839-5p          | 1 |
| <i>circSORBS1</i> | miR-383-3p                | 1 |

|                   |                     |   |
|-------------------|---------------------|---|
| <i>circSORBS1</i> | miR-383-5p.2        | 1 |
| <i>circSORBS1</i> | miR-384             | 1 |
| <i>circSORBS1</i> | miR-3909            | 2 |
| <i>circSORBS1</i> | miR-3910            | 3 |
| <i>circSORBS1</i> | miR-3911            | 1 |
| <i>circSORBS1</i> | miR-3913-3p         | 2 |
| <i>circSORBS1</i> | miR-3917            | 2 |
| <i>circSORBS1</i> | miR-3918            | 1 |
| <i>circSORBS1</i> | miR-3919            | 1 |
| <i>circSORBS1</i> | miR-3920            | 1 |
| <i>circSORBS1</i> | miR-3921/4653-5p    | 3 |
| <i>circSORBS1</i> | miR-3922-5p         | 1 |
| <i>circSORBS1</i> | miR-3924            | 1 |
| <i>circSORBS1</i> | miR-3925-3p         | 2 |
| <i>circSORBS1</i> | miR-3925-5p         | 3 |
| <i>circSORBS1</i> | miR-3927-5p         | 2 |
| <i>circSORBS1</i> | miR-3929/4419b/4478 | 1 |
| <i>circSORBS1</i> | miR-3938            | 4 |
| <i>circSORBS1</i> | miR-3940-3p         | 2 |
| <i>circSORBS1</i> | miR-3944-5p         | 2 |
| <i>circSORBS1</i> | miR-3945            | 1 |
| <i>circSORBS1</i> | miR-3960/8072       | 1 |
| <i>circSORBS1</i> | miR-3973            | 1 |
| <i>circSORBS1</i> | miR-3974            | 1 |
| <i>circSORBS1</i> | miR-3975            | 2 |
| <i>circSORBS1</i> | miR-3976            | 1 |
| <i>circSORBS1</i> | miR-3977            | 2 |
| <i>circSORBS1</i> | miR-3978            | 1 |
| <i>circSORBS1</i> | miR-409-5p          | 2 |
| <i>circSORBS1</i> | miR-412-3p/6754-3p  | 1 |
| <i>circSORBS1</i> | miR-424-3p          | 1 |
| <i>circSORBS1</i> | miR-4251            | 1 |
| <i>circSORBS1</i> | miR-4252            | 2 |
| <i>circSORBS1</i> | miR-4253/6862-5p    | 1 |
| <i>circSORBS1</i> | miR-4256            | 2 |
| <i>circSORBS1</i> | miR-4257            | 3 |
| <i>circSORBS1</i> | miR-4259            | 1 |
| <i>circSORBS1</i> | miR-4261            | 2 |



|                   |                       |   |
|-------------------|-----------------------|---|
| <i>circSORBS1</i> | miR-4264              | 1 |
| <i>circSORBS1</i> | miR-4266              | 1 |
| <i>circSORBS1</i> | miR-4268              | 4 |
| <i>circSORBS1</i> | miR-4270/4441/6754-5p | 1 |
| <i>circSORBS1</i> | miR-4274              | 1 |
| <i>circSORBS1</i> | miR-4279              | 1 |
| <i>circSORBS1</i> | miR-4280              | 1 |
| <i>circSORBS1</i> | miR-4281              | 2 |
| <i>circSORBS1</i> | miR-4286              | 5 |
| <i>circSORBS1</i> | miR-4287/4685-3p      | 2 |
| <i>circSORBS1</i> | miR-4290              | 3 |
| <i>circSORBS1</i> | miR-4291              | 3 |
| <i>circSORBS1</i> | miR-4292/6791-5p      | 4 |
| <i>circSORBS1</i> | miR-4293              | 2 |
| <i>circSORBS1</i> | miR-4297/5581-5p      | 2 |
| <i>circSORBS1</i> | miR-4301              | 2 |
| <i>circSORBS1</i> | miR-4307              | 2 |
| <i>circSORBS1</i> | miR-4308              | 4 |
| <i>circSORBS1</i> | miR-4311              | 1 |
| <i>circSORBS1</i> | miR-4312              | 1 |
| <i>circSORBS1</i> | miR-4313              | 4 |
| <i>circSORBS1</i> | miR-4314              | 2 |
| <i>circSORBS1</i> | miR-4315              | 1 |
| <i>circSORBS1</i> | miR-4317              | 1 |
| <i>circSORBS1</i> | miR-432-3p            | 1 |
| <i>circSORBS1</i> | miR-432-5p            | 1 |
| <i>circSORBS1</i> | miR-4320              | 2 |
| <i>circSORBS1</i> | miR-4324              | 1 |
| <i>circSORBS1</i> | miR-4325              | 1 |
| <i>circSORBS1</i> | miR-4326              | 2 |
| <i>circSORBS1</i> | miR-4328              | 1 |
| <i>circSORBS1</i> | miR-4329              | 1 |
| <i>circSORBS1</i> | miR-433-3p            | 1 |
| <i>circSORBS1</i> | miR-4330              | 1 |
| <i>circSORBS1</i> | miR-4417              | 1 |
| <i>circSORBS1</i> | miR-4421/5699-3p      | 1 |
| <i>circSORBS1</i> | miR-4424              | 2 |
| <i>circSORBS1</i> | miR-4425              | 1 |

|                   |                                              |   |
|-------------------|----------------------------------------------|---|
| <i>circSORBS1</i> | miR-4426/4647/4662b                          | 2 |
| <i>circSORBS1</i> | miR-4431                                     | 2 |
| <i>circSORBS1</i> | miR-4432                                     | 2 |
| <i>circSORBS1</i> | miR-4433a-5p                                 | 2 |
| <i>circSORBS1</i> | miR-4433b-5p                                 | 3 |
| <i>circSORBS1</i> | miR-4436b-3p/4632-5p/6735-5p/6879-5p/7843-5p | 2 |
| <i>circSORBS1</i> | miR-4443                                     | 2 |
| <i>circSORBS1</i> | miR-4444                                     | 3 |
| <i>circSORBS1</i> | miR-4445-5p                                  | 1 |
| <i>circSORBS1</i> | miR-4446-3p                                  | 2 |
| <i>circSORBS1</i> | miR-4446-5p                                  | 1 |
| <i>circSORBS1</i> | miR-4448                                     | 4 |
| <i>circSORBS1</i> | miR-4453/4538                                | 1 |
| <i>circSORBS1</i> | miR-4461                                     | 1 |
| <i>circSORBS1</i> | miR-4463                                     | 1 |
| <i>circSORBS1</i> | miR-4467                                     | 1 |
| <i>circSORBS1</i> | miR-4468                                     | 1 |
| <i>circSORBS1</i> | miR-4469                                     | 2 |
| <i>circSORBS1</i> | miR-4475                                     | 1 |
| <i>circSORBS1</i> | miR-4480                                     | 3 |
| <i>circSORBS1</i> | miR-4481/4745-5p                             | 2 |
| <i>circSORBS1</i> | miR-4485-5p                                  | 2 |
| <i>circSORBS1</i> | miR-4487                                     | 2 |
| <i>circSORBS1</i> | miR-4490                                     | 1 |
| <i>circSORBS1</i> | miR-4493                                     | 3 |
| <i>circSORBS1</i> | miR-4496                                     | 4 |
| <i>circSORBS1</i> | miR-4497                                     | 1 |
| <i>circSORBS1</i> | miR-4499                                     | 1 |
| <i>circSORBS1</i> | miR-449c-3p                                  | 2 |
| <i>circSORBS1</i> | miR-4501                                     | 3 |
| <i>circSORBS1</i> | miR-4502                                     | 1 |
| <i>circSORBS1</i> | miR-4503                                     | 1 |
| <i>circSORBS1</i> | miR-450a-1-3p                                | 1 |
| <i>circSORBS1</i> | miR-450b-3p/769-3p                           | 1 |
| <i>circSORBS1</i> | miR-450b-5p                                  | 3 |
| <i>circSORBS1</i> | miR-451                                      | 2 |
| <i>circSORBS1</i> | miR-4517                                     | 1 |
| <i>circSORBS1</i> | miR-4519                                     | 1 |

|                   |                          |   |
|-------------------|--------------------------|---|
| <i>circSORBS1</i> | miR-451b                 | 3 |
| <i>circSORBS1</i> | miR-452-3p               | 1 |
| <i>circSORBS1</i> | miR-4520-5p              | 1 |
| <i>circSORBS1</i> | miR-4522                 | 2 |
| <i>circSORBS1</i> | miR-4524b-3p             | 1 |
| <i>circSORBS1</i> | miR-4527/6503-5p         | 1 |
| <i>circSORBS1</i> | miR-4530                 | 2 |
| <i>circSORBS1</i> | miR-4532                 | 2 |
| <i>circSORBS1</i> | miR-4533                 | 1 |
| <i>circSORBS1</i> | miR-4539                 | 2 |
| <i>circSORBS1</i> | miR-455-3p.1             | 2 |
| <i>circSORBS1</i> | miR-4632-3p              | 1 |
| <i>circSORBS1</i> | miR-4633-3p/6500-5p      | 3 |
| <i>circSORBS1</i> | miR-4638-5p              | 1 |
| <i>circSORBS1</i> | miR-4640-3p              | 3 |
| <i>circSORBS1</i> | miR-4645-3p              | 2 |
| <i>circSORBS1</i> | miR-4646-3p              | 2 |
| <i>circSORBS1</i> | miR-4648                 | 1 |
| <i>circSORBS1</i> | miR-4652-5p              | 2 |
| <i>circSORBS1</i> | miR-4654/4769-5p         | 1 |
| <i>circSORBS1</i> | miR-4658/6790-5p         | 1 |
| <i>circSORBS1</i> | miR-4659a-3p/4659b-3p    | 4 |
| <i>circSORBS1</i> | miR-4660                 | 2 |
| <i>circSORBS1</i> | miR-4661-3p              | 1 |
| <i>circSORBS1</i> | miR-4662-5p              | 2 |
| <i>circSORBS1</i> | miR-4663                 | 1 |
| <i>circSORBS1</i> | miR-4664-3p              | 1 |
| <i>circSORBS1</i> | miR-4666b                | 1 |
| <i>circSORBS1</i> | miR-4667-3p              | 6 |
| <i>circSORBS1</i> | miR-4667-5p/4700-5p/8089 | 4 |
| <i>circSORBS1</i> | miR-4668-3p              | 1 |
| <i>circSORBS1</i> | miR-4668-5p              | 2 |
| <i>circSORBS1</i> | miR-4670-3p              | 1 |
| <i>circSORBS1</i> | miR-4670-5p              | 1 |
| <i>circSORBS1</i> | miR-4671-5p              | 1 |
| <i>circSORBS1</i> | miR-4681                 | 2 |
| <i>circSORBS1</i> | miR-4682                 | 1 |
| <i>circSORBS1</i> | miR-4684-3p              | 1 |

|                   |                             |   |
|-------------------|-----------------------------|---|
| <i>circSORBS1</i> | miR-4684-5p                 | 2 |
| <i>circSORBS1</i> | miR-4686                    | 2 |
| <i>circSORBS1</i> | miR-4687-5p                 | 4 |
| <i>circSORBS1</i> | miR-4690-3p/5685            | 5 |
| <i>circSORBS1</i> | miR-4690-5p                 | 1 |
| <i>circSORBS1</i> | miR-4691-3p                 | 7 |
| <i>circSORBS1</i> | miR-4691-5p/6792-3p         | 7 |
| <i>circSORBS1</i> | miR-4693-3p                 | 2 |
| <i>circSORBS1</i> | miR-4696                    | 2 |
| <i>circSORBS1</i> | miR-4700-3p                 | 2 |
| <i>circSORBS1</i> | miR-4703-3p                 | 2 |
| <i>circSORBS1</i> | miR-4707-3p                 | 2 |
| <i>circSORBS1</i> | miR-4707-5p                 | 4 |
| <i>circSORBS1</i> | miR-4708-3p                 | 1 |
| <i>circSORBS1</i> | miR-4709-3p                 | 2 |
| <i>circSORBS1</i> | miR-4713-5p                 | 3 |
| <i>circSORBS1</i> | miR-4714-3p                 | 1 |
| <i>circSORBS1</i> | miR-4715-3p                 | 2 |
| <i>circSORBS1</i> | miR-4715-5p                 | 1 |
| <i>circSORBS1</i> | miR-4716-5p                 | 1 |
| <i>circSORBS1</i> | miR-4719                    | 1 |
| <i>circSORBS1</i> | miR-4720-5p/4799-3p/5588-5p | 2 |
| <i>circSORBS1</i> | miR-4721                    | 2 |
| <i>circSORBS1</i> | miR-4722-3p/6727-3p         | 3 |
| <i>circSORBS1</i> | miR-4722-5p                 | 1 |
| <i>circSORBS1</i> | miR-4724-3p                 | 3 |
| <i>circSORBS1</i> | miR-4724-5p                 | 1 |
| <i>circSORBS1</i> | miR-4725-5p                 | 3 |
| <i>circSORBS1</i> | miR-4726-3p                 | 2 |
| <i>circSORBS1</i> | miR-4727-5p                 | 1 |
| <i>circSORBS1</i> | miR-4730                    | 1 |
| <i>circSORBS1</i> | miR-4731-3p/4801            | 1 |
| <i>circSORBS1</i> | miR-4732-3p                 | 1 |
| <i>circSORBS1</i> | miR-4733-3p                 | 1 |
| <i>circSORBS1</i> | miR-4733-5p                 | 4 |
| <i>circSORBS1</i> | miR-4734                    | 1 |
| <i>circSORBS1</i> | miR-4737                    | 2 |
| <i>circSORBS1</i> | miR-4738-5p                 | 1 |

|                   |                     |   |
|-------------------|---------------------|---|
| <i>circSORBS1</i> | miR-4739            | 1 |
| <i>circSORBS1</i> | miR-4740-3p         | 1 |
| <i>circSORBS1</i> | miR-4746-3p         | 1 |
| <i>circSORBS1</i> | miR-4747-3p         | 2 |
| <i>circSORBS1</i> | miR-4747-5p/5196-5p | 1 |
| <i>circSORBS1</i> | miR-4750-3p         | 5 |
| <i>circSORBS1</i> | miR-4751            | 2 |
| <i>circSORBS1</i> | miR-4755-5p/5006-3p | 6 |
| <i>circSORBS1</i> | miR-4756-3p         | 1 |
| <i>circSORBS1</i> | miR-4757-5p/6744-3p | 3 |
| <i>circSORBS1</i> | miR-4758-3p         | 2 |
| <i>circSORBS1</i> | miR-4759            | 2 |
| <i>circSORBS1</i> | miR-4761-3p         | 2 |
| <i>circSORBS1</i> | miR-4762-3p         | 1 |
| <i>circSORBS1</i> | miR-4766-3p         | 1 |
| <i>circSORBS1</i> | miR-4766-5p         | 1 |
| <i>circSORBS1</i> | miR-4767            | 1 |
| <i>circSORBS1</i> | miR-4768-5p/6833-3p | 1 |
| <i>circSORBS1</i> | miR-4769-3p/6817-5p | 3 |
| <i>circSORBS1</i> | miR-4771            | 1 |
| <i>circSORBS1</i> | miR-4774-3p         | 1 |
| <i>circSORBS1</i> | miR-4774-5p         | 1 |
| <i>circSORBS1</i> | miR-4777-3p         | 2 |
| <i>circSORBS1</i> | miR-4777-5p         | 1 |
| <i>circSORBS1</i> | miR-4778-3p         | 2 |
| <i>circSORBS1</i> | miR-4780            | 1 |
| <i>circSORBS1</i> | miR-4782-5p/5706    | 1 |
| <i>circSORBS1</i> | miR-4786-5p         | 2 |
| <i>circSORBS1</i> | miR-4793-3p         | 1 |
| <i>circSORBS1</i> | miR-4793-5p         | 2 |
| <i>circSORBS1</i> | miR-4795-5p         | 2 |
| <i>circSORBS1</i> | miR-4797-3p         | 1 |
| <i>circSORBS1</i> | miR-4797-5p         | 3 |
| <i>circSORBS1</i> | miR-4798-3p         | 1 |
| <i>circSORBS1</i> | miR-4800-3p         | 2 |
| <i>circSORBS1</i> | miR-4802-3p         | 1 |
| <i>circSORBS1</i> | miR-4802-5p         | 1 |
| <i>circSORBS1</i> | miR-483-3p.1        | 2 |

|                   |                             |   |
|-------------------|-----------------------------|---|
| <i>circSORBS1</i> | miR-483-3p.2                | 3 |
| <i>circSORBS1</i> | miR-484/3155                | 2 |
| <i>circSORBS1</i> | miR-485-5p                  | 2 |
| <i>circSORBS1</i> | miR-487a-5p/487b-5p         | 2 |
| <i>circSORBS1</i> | miR-488-5p                  | 2 |
| <i>circSORBS1</i> | miR-489-3p                  | 3 |
| <i>circSORBS1</i> | miR-490-5p                  | 2 |
| <i>circSORBS1</i> | miR-492                     | 2 |
| <i>circSORBS1</i> | miR-493-3p                  | 1 |
| <i>circSORBS1</i> | miR-5000-3p                 | 3 |
| <i>circSORBS1</i> | miR-5001-3p                 | 1 |
| <i>circSORBS1</i> | miR-5002-3p                 | 1 |
| <i>circSORBS1</i> | miR-5003-5p                 | 2 |
| <i>circSORBS1</i> | miR-5004-5p                 | 2 |
| <i>circSORBS1</i> | miR-5006-5p                 | 2 |
| <i>circSORBS1</i> | miR-5007-5p                 | 4 |
| <i>circSORBS1</i> | miR-5008-3p/6737-3p/7157-3p | 2 |
| <i>circSORBS1</i> | miR-500a-5p                 | 1 |
| <i>circSORBS1</i> | miR-501-5p                  | 2 |
| <i>circSORBS1</i> | miR-5011-3p                 | 1 |
| <i>circSORBS1</i> | miR-502-5p                  | 1 |
| <i>circSORBS1</i> | miR-503-5p                  | 2 |
| <i>circSORBS1</i> | miR-504-3p                  | 1 |
| <i>circSORBS1</i> | miR-504-5p.1                | 1 |
| <i>circSORBS1</i> | miR-507/557                 | 3 |
| <i>circSORBS1</i> | miR-508-3p                  | 1 |
| <i>circSORBS1</i> | miR-508-5p                  | 1 |
| <i>circSORBS1</i> | miR-5088-5p                 | 2 |
| <i>circSORBS1</i> | miR-5089-5p                 | 1 |
| <i>circSORBS1</i> | miR-5092                    | 2 |
| <i>circSORBS1</i> | miR-5093                    | 1 |
| <i>circSORBS1</i> | miR-5094                    | 1 |
| <i>circSORBS1</i> | miR-5095/7151-3p            | 1 |
| <i>circSORBS1</i> | miR-510-3p                  | 1 |
| <i>circSORBS1</i> | miR-510-5p                  | 1 |
| <i>circSORBS1</i> | miR-512-3p                  | 3 |
| <i>circSORBS1</i> | miR-512-5p                  | 5 |
| <i>circSORBS1</i> | miR-513a-5p                 | 2 |

|                   |                                                                  |   |
|-------------------|------------------------------------------------------------------|---|
| <i>circSORBS1</i> | miR-513b-5p                                                      | 1 |
| <i>circSORBS1</i> | miR-514a-3p                                                      | 3 |
| <i>circSORBS1</i> | miR-516a-3p/516b-3p/7162-5p                                      | 1 |
| <i>circSORBS1</i> | miR-516b-5p                                                      | 1 |
| <i>circSORBS1</i> | miR-517-5p                                                       | 1 |
| <i>circSORBS1</i> | miR-518c-5p                                                      | 4 |
| <i>circSORBS1</i> | miR-518d-5p/519-5p                                               | 1 |
| <i>circSORBS1</i> | miR-519-3p                                                       | 1 |
| <i>circSORBS1</i> | miR-5192                                                         | 1 |
| <i>circSORBS1</i> | miR-5193                                                         | 8 |
| <i>circSORBS1</i> | miR-5195-5p                                                      | 1 |
| <i>circSORBS1</i> | miR-5196-3p                                                      | 2 |
| <i>circSORBS1</i> | miR-5197-3p                                                      | 1 |
| <i>circSORBS1</i> | miR-519d-5p                                                      | 2 |
| <i>circSORBS1</i> | miR-520f-5p                                                      | 1 |
| <i>circSORBS1</i> | miR-520g-3p                                                      | 1 |
| <i>circSORBS1</i> | miR-524-5p                                                       | 2 |
| <i>circSORBS1</i> | miR-532-3p                                                       | 3 |
| <i>circSORBS1</i> | miR-539-5p                                                       | 1 |
| <i>circSORBS1</i> | miR-543                                                          | 1 |
| <i>circSORBS1</i> | miR-544b                                                         | 1 |
| <i>circSORBS1</i> | miR-548ac/548bb-3p/548d-3p/548h-3p/548z                          | 2 |
| <i>circSORBS1</i> | miR-548ad-3p                                                     | 1 |
| <i>circSORBS1</i> | miR-548ah-5p/3609                                                | 1 |
| <i>circSORBS1</i> | miR-548aj-5p/548f-5p/548g-5p/548x-5p                             | 1 |
| <i>circSORBS1</i> | miR-548ap-3p/548aa/548t-3p                                       | 6 |
| <i>circSORBS1</i> | miR-548aq-3p/548am-3p/548aj-3p/548ah-3p/548ae-3p/548j-3p/548x-3p | 2 |
| <i>circSORBS1</i> | miR-548as-3p                                                     | 6 |
| <i>circSORBS1</i> | miR-548at-5p                                                     | 1 |
| <i>circSORBS1</i> | miR-548au-3p                                                     | 2 |
| <i>circSORBS1</i> | miR-548av-3p                                                     | 1 |
| <i>circSORBS1</i> | miR-548ay-3p/548at-3p                                            | 6 |
| <i>circSORBS1</i> | miR-548az-3p/548ar-3p/548a-3p/548e-3p/548f-3p                    | 1 |
| <i>circSORBS1</i> | miR-548az-5p/548t-5p                                             | 1 |
| <i>circSORBS1</i> | miR-548c-3p                                                      | 1 |
| <i>circSORBS1</i> | miR-548e-5p                                                      | 1 |
| <i>circSORBS1</i> | miR-548g-3p                                                      | 2 |
| <i>circSORBS1</i> | miR-548m                                                         | 2 |

|                   |                  |   |
|-------------------|------------------|---|
| <i>circSORBS1</i> | miR-548n         | 1 |
| <i>circSORBS1</i> | miR-548p         | 5 |
| <i>circSORBS1</i> | miR-548u/7161-5p | 1 |
| <i>circSORBS1</i> | miR-548v         | 1 |
| <i>circSORBS1</i> | miR-550b-2-5p    | 1 |
| <i>circSORBS1</i> | miR-558          | 2 |
| <i>circSORBS1</i> | miR-5581-3p      | 1 |
| <i>circSORBS1</i> | miR-5582-3p      | 1 |
| <i>circSORBS1</i> | miR-5582-5p      | 3 |
| <i>circSORBS1</i> | miR-5583-3p      | 1 |
| <i>circSORBS1</i> | miR-5584-5p      | 1 |
| <i>circSORBS1</i> | miR-5586-3p      | 1 |
| <i>circSORBS1</i> | miR-5586-5p      | 3 |
| <i>circSORBS1</i> | miR-5587-3p      | 4 |
| <i>circSORBS1</i> | miR-5588-3p      | 2 |
| <i>circSORBS1</i> | miR-561-3p       | 1 |
| <i>circSORBS1</i> | miR-5683         | 1 |
| <i>circSORBS1</i> | miR-5684         | 1 |
| <i>circSORBS1</i> | miR-569          | 2 |
| <i>circSORBS1</i> | miR-5691         | 1 |
| <i>circSORBS1</i> | miR-5694         | 1 |
| <i>circSORBS1</i> | miR-5695         | 2 |
| <i>circSORBS1</i> | miR-5699-5p      | 2 |
| <i>circSORBS1</i> | miR-570-3p       | 7 |
| <i>circSORBS1</i> | miR-5701         | 1 |
| <i>circSORBS1</i> | miR-5702         | 1 |
| <i>circSORBS1</i> | miR-5704         | 2 |
| <i>circSORBS1</i> | miR-5705         | 2 |
| <i>circSORBS1</i> | miR-571          | 1 |
| <i>circSORBS1</i> | miR-572          | 2 |
| <i>circSORBS1</i> | miR-573/3616-5p  | 2 |
| <i>circSORBS1</i> | miR-574-5p       | 1 |
| <i>circSORBS1</i> | miR-575/4676-5p  | 7 |
| <i>circSORBS1</i> | miR-576-3p       | 2 |
| <i>circSORBS1</i> | miR-582-3p       | 2 |
| <i>circSORBS1</i> | miR-583          | 1 |
| <i>circSORBS1</i> | miR-587          | 2 |
| <i>circSORBS1</i> | miR-589-3p       | 1 |



|                   |                    |   |
|-------------------|--------------------|---|
| <i>circSORBS1</i> | miR-593-5p         | 2 |
| <i>circSORBS1</i> | miR-595            | 1 |
| <i>circSORBS1</i> | miR-596            | 2 |
| <i>circSORBS1</i> | miR-597-3p         | 1 |
| <i>circSORBS1</i> | miR-598-5p         | 1 |
| <i>circSORBS1</i> | miR-604            | 2 |
| <i>circSORBS1</i> | miR-605-3p         | 3 |
| <i>circSORBS1</i> | miR-605-5p         | 1 |
| <i>circSORBS1</i> | miR-6068           | 1 |
| <i>circSORBS1</i> | miR-6072/6891-3p   | 1 |
| <i>circSORBS1</i> | miR-6077           | 2 |
| <i>circSORBS1</i> | miR-6082           | 1 |
| <i>circSORBS1</i> | miR-6083           | 1 |
| <i>circSORBS1</i> | miR-6084           | 1 |
| <i>circSORBS1</i> | miR-6090           | 3 |
| <i>circSORBS1</i> | miR-611/3131       | 1 |
| <i>circSORBS1</i> | miR-6124           | 3 |
| <i>circSORBS1</i> | miR-6125           | 2 |
| <i>circSORBS1</i> | miR-6131           | 2 |
| <i>circSORBS1</i> | miR-6134           | 2 |
| <i>circSORBS1</i> | miR-615-3p         | 1 |
| <i>circSORBS1</i> | miR-6165           | 1 |
| <i>circSORBS1</i> | miR-619-3p         | 3 |
| <i>circSORBS1</i> | miR-619-5p/6506-5p | 2 |
| <i>circSORBS1</i> | miR-623            | 2 |
| <i>circSORBS1</i> | miR-624-5p         | 2 |
| <i>circSORBS1</i> | miR-627-5p         | 1 |
| <i>circSORBS1</i> | miR-628-5p         | 1 |
| <i>circSORBS1</i> | miR-633            | 2 |
| <i>circSORBS1</i> | miR-635/6774-5p    | 2 |
| <i>circSORBS1</i> | miR-636            | 2 |
| <i>circSORBS1</i> | miR-637            | 4 |
| <i>circSORBS1</i> | miR-639            | 1 |
| <i>circSORBS1</i> | miR-640            | 2 |
| <i>circSORBS1</i> | miR-642a-5p        | 7 |
| <i>circSORBS1</i> | miR-642b-5p        | 4 |
| <i>circSORBS1</i> | miR-644a           | 1 |
| <i>circSORBS1</i> | miR-645            | 2 |

|                   |                  |   |
|-------------------|------------------|---|
| <i>circSORBS1</i> | miR-646          | 2 |
| <i>circSORBS1</i> | miR-647          | 1 |
| <i>circSORBS1</i> | miR-648          | 1 |
| <i>circSORBS1</i> | miR-6501-3p      | 1 |
| <i>circSORBS1</i> | miR-6502-3p      | 2 |
| <i>circSORBS1</i> | miR-6507-5p      | 3 |
| <i>circSORBS1</i> | miR-651-5p       | 1 |
| <i>circSORBS1</i> | miR-6510-5p      | 1 |
| <i>circSORBS1</i> | miR-6511-3p      | 5 |
| <i>circSORBS1</i> | miR-6513-5p      | 1 |
| <i>circSORBS1</i> | miR-6514-3p      | 1 |
| <i>circSORBS1</i> | miR-6514-5p      | 1 |
| <i>circSORBS1</i> | miR-6515-3p      | 1 |
| <i>circSORBS1</i> | miR-6515-5p      | 2 |
| <i>circSORBS1</i> | miR-6516-5p      | 2 |
| <i>circSORBS1</i> | miR-652-5p       | 3 |
| <i>circSORBS1</i> | miR-659-5p       | 2 |
| <i>circSORBS1</i> | miR-660-3p       | 8 |
| <i>circSORBS1</i> | miR-660-5p       | 1 |
| <i>circSORBS1</i> | miR-661          | 1 |
| <i>circSORBS1</i> | miR-662          | 1 |
| <i>circSORBS1</i> | miR-663b         | 2 |
| <i>circSORBS1</i> | miR-664a-5p/4794 | 2 |
| <i>circSORBS1</i> | miR-664b-5p      | 1 |
| <i>circSORBS1</i> | miR-668-5p       | 2 |
| <i>circSORBS1</i> | miR-670-3p       | 2 |
| <i>circSORBS1</i> | miR-670-5p       | 3 |
| <i>circSORBS1</i> | miR-6716-5p      | 2 |
| <i>circSORBS1</i> | miR-6719-3p      | 3 |
| <i>circSORBS1</i> | miR-6720-3p      | 2 |
| <i>circSORBS1</i> | miR-6720-5p      | 3 |
| <i>circSORBS1</i> | miR-6728-3p      | 1 |
| <i>circSORBS1</i> | miR-6728-5p      | 1 |
| <i>circSORBS1</i> | miR-6729-3p      | 3 |
| <i>circSORBS1</i> | miR-6730-3p      | 3 |
| <i>circSORBS1</i> | miR-6731-3p      | 2 |
| <i>circSORBS1</i> | miR-6731-5p/8085 | 1 |
| <i>circSORBS1</i> | miR-6732-3p      | 1 |

|                   |                     |   |
|-------------------|---------------------|---|
| <i>circSORBS1</i> | miR-6734-3p         | 4 |
| <i>circSORBS1</i> | miR-6740-3p         | 1 |
| <i>circSORBS1</i> | miR-6741-3p         | 2 |
| <i>circSORBS1</i> | miR-6742-3p         | 3 |
| <i>circSORBS1</i> | miR-6744-5p         | 2 |
| <i>circSORBS1</i> | miR-6746-5p         | 2 |
| <i>circSORBS1</i> | miR-6747-3p         | 3 |
| <i>circSORBS1</i> | miR-6748-3p         | 1 |
| <i>circSORBS1</i> | miR-6749-3p         | 7 |
| <i>circSORBS1</i> | miR-6749-5p         | 1 |
| <i>circSORBS1</i> | miR-6750-5p/6822-5p | 1 |
| <i>circSORBS1</i> | miR-6752-3p         | 4 |
| <i>circSORBS1</i> | miR-6753-3p/7107-3p | 1 |
| <i>circSORBS1</i> | miR-6753-5p         | 1 |
| <i>circSORBS1</i> | miR-6755-3p         | 2 |
| <i>circSORBS1</i> | miR-6756-5p/6766-5p | 1 |
| <i>circSORBS1</i> | miR-6757-3p         | 1 |
| <i>circSORBS1</i> | miR-6759-3p         | 1 |
| <i>circSORBS1</i> | miR-676-3p          | 1 |
| <i>circSORBS1</i> | miR-676-5p          | 2 |
| <i>circSORBS1</i> | miR-6760-5p         | 1 |
| <i>circSORBS1</i> | miR-6761-3p         | 1 |
| <i>circSORBS1</i> | miR-6761-5p         | 1 |
| <i>circSORBS1</i> | miR-6762-3p         | 2 |
| <i>circSORBS1</i> | miR-6762-5p/6845-5p | 2 |
| <i>circSORBS1</i> | miR-6764-3p/6824-3p | 4 |
| <i>circSORBS1</i> | miR-6765-3p         | 3 |
| <i>circSORBS1</i> | miR-6765-5p         | 1 |
| <i>circSORBS1</i> | miR-6767-3p         | 1 |
| <i>circSORBS1</i> | miR-6767-5p         | 2 |
| <i>circSORBS1</i> | miR-6770-3p         | 1 |
| <i>circSORBS1</i> | miR-6770-5p         | 1 |
| <i>circSORBS1</i> | miR-6771-3p         | 4 |
| <i>circSORBS1</i> | miR-6772-3p         | 2 |
| <i>circSORBS1</i> | miR-6776-3p         | 2 |
| <i>circSORBS1</i> | miR-6777-3p         | 2 |
| <i>circSORBS1</i> | miR-6779-3p         | 4 |
| <i>circSORBS1</i> | miR-6780a-3p        | 3 |

|                   |                     |    |
|-------------------|---------------------|----|
| <i>circSORBS1</i> | miR-6780b-3p        | 1  |
| <i>circSORBS1</i> | miR-6782-3p         | 2  |
| <i>circSORBS1</i> | miR-6784-3p/6862-3p | 5  |
| <i>circSORBS1</i> | miR-6786-3p         | 2  |
| <i>circSORBS1</i> | miR-6787-3p         | 1  |
| <i>circSORBS1</i> | miR-6790-3p         | 6  |
| <i>circSORBS1</i> | miR-6793-3p         | 1  |
| <i>circSORBS1</i> | miR-6794-3p         | 1  |
| <i>circSORBS1</i> | miR-6795-3p         | 2  |
| <i>circSORBS1</i> | miR-6800-3p         | 5  |
| <i>circSORBS1</i> | miR-6801-3p/6810-3p | 2  |
| <i>circSORBS1</i> | miR-6801-5p         | 1  |
| <i>circSORBS1</i> | miR-6806-5p         | 1  |
| <i>circSORBS1</i> | miR-6809-3p         | 1  |
| <i>circSORBS1</i> | miR-6809-5p         | 3  |
| <i>circSORBS1</i> | miR-6810-5p         | 2  |
| <i>circSORBS1</i> | miR-6813-3p         | 1  |
| <i>circSORBS1</i> | miR-6814-5p         | 4  |
| <i>circSORBS1</i> | miR-6815-3p         | 3  |
| <i>circSORBS1</i> | miR-6815-5p/6865-5p | 2  |
| <i>circSORBS1</i> | miR-6816-3p         | 1  |
| <i>circSORBS1</i> | miR-6817-3p         | 3  |
| <i>circSORBS1</i> | miR-6818-3p         | 2  |
| <i>circSORBS1</i> | miR-6821-3p         | 6  |
| <i>circSORBS1</i> | miR-6827-5p         | 3  |
| <i>circSORBS1</i> | miR-6834-3p         | 1  |
| <i>circSORBS1</i> | miR-6836-3p         | 1  |
| <i>circSORBS1</i> | miR-6837-3p         | 1  |
| <i>circSORBS1</i> | miR-6838-3p         | 3  |
| <i>circSORBS1</i> | miR-6840-3p         | 2  |
| <i>circSORBS1</i> | miR-6840-5p         | 2  |
| <i>circSORBS1</i> | miR-6841-3p         | 1  |
| <i>circSORBS1</i> | miR-6842-3p         | 1  |
| <i>circSORBS1</i> | miR-6844            | 2  |
| <i>circSORBS1</i> | miR-6845-3p         | 3  |
| <i>circSORBS1</i> | miR-6847-5p         | 3  |
| <i>circSORBS1</i> | miR-6849-3p         | 10 |
| <i>circSORBS1</i> | miR-6850-3p         | 1  |

|                   |             |   |
|-------------------|-------------|---|
| <i>circSORBS1</i> | miR-6852-5p | 3 |
| <i>circSORBS1</i> | miR-6854-5p | 1 |
| <i>circSORBS1</i> | miR-6856-3p | 5 |
| <i>circSORBS1</i> | miR-6857-5p | 2 |
| <i>circSORBS1</i> | miR-6858-3p | 7 |
| <i>circSORBS1</i> | miR-6861-3p | 2 |
| <i>circSORBS1</i> | miR-6867-3p | 3 |
| <i>circSORBS1</i> | miR-6868-3p | 5 |
| <i>circSORBS1</i> | miR-6868-5p | 2 |
| <i>circSORBS1</i> | miR-6870-3p | 1 |
| <i>circSORBS1</i> | miR-6871-3p | 2 |
| <i>circSORBS1</i> | miR-6871-5p | 1 |
| <i>circSORBS1</i> | miR-6873-3p | 2 |
| <i>circSORBS1</i> | miR-6873-5p | 2 |
| <i>circSORBS1</i> | miR-6874-5p | 2 |
| <i>circSORBS1</i> | miR-6875-3p | 4 |
| <i>circSORBS1</i> | miR-6878-5p | 1 |
| <i>circSORBS1</i> | miR-6881-3p | 3 |
| <i>circSORBS1</i> | miR-6882-3p | 1 |
| <i>circSORBS1</i> | miR-6882-5p | 1 |
| <i>circSORBS1</i> | miR-6883-3p | 1 |
| <i>circSORBS1</i> | miR-6884-3p | 2 |
| <i>circSORBS1</i> | miR-6886-5p | 2 |
| <i>circSORBS1</i> | miR-6887-3p | 2 |
| <i>circSORBS1</i> | miR-6888-3p | 1 |
| <i>circSORBS1</i> | miR-6889-3p | 2 |
| <i>circSORBS1</i> | miR-6890-3p | 2 |
| <i>circSORBS1</i> | miR-6892-3p | 4 |
| <i>circSORBS1</i> | miR-6894-3p | 1 |
| <i>circSORBS1</i> | miR-6894-5p | 2 |
| <i>circSORBS1</i> | miR-7-5p    | 2 |
| <i>circSORBS1</i> | miR-7106-3p | 2 |
| <i>circSORBS1</i> | miR-7109-3p | 3 |
| <i>circSORBS1</i> | miR-7110-3p | 3 |
| <i>circSORBS1</i> | miR-7111-3p | 3 |
| <i>circSORBS1</i> | miR-7112-5p | 1 |
| <i>circSORBS1</i> | miR-7113-3p | 2 |
| <i>circSORBS1</i> | miR-7150    | 2 |

|                   |             |   |
|-------------------|-------------|---|
| <i>circSORBS1</i> | miR-7152-3p | 2 |
| <i>circSORBS1</i> | miR-7152-5p | 2 |
| <i>circSORBS1</i> | miR-7153-3p | 1 |
| <i>circSORBS1</i> | miR-7154-3p | 2 |
| <i>circSORBS1</i> | miR-7154-5p | 1 |
| <i>circSORBS1</i> | miR-7155-5p | 4 |
| <i>circSORBS1</i> | miR-7156-3p | 5 |
| <i>circSORBS1</i> | miR-7158-3p | 1 |
| <i>circSORBS1</i> | miR-7160-5p | 1 |
| <i>circSORBS1</i> | miR-744-3p  | 1 |
| <i>circSORBS1</i> | miR-7515    | 1 |
| <i>circSORBS1</i> | miR-759     | 2 |
| <i>circSORBS1</i> | miR-764     | 1 |
| <i>circSORBS1</i> | miR-765     | 2 |
| <i>circSORBS1</i> | miR-766-3p  | 2 |
| <i>circSORBS1</i> | miR-766-5p  | 2 |
| <i>circSORBS1</i> | miR-767-3p  | 2 |
| <i>circSORBS1</i> | miR-767-5p  | 1 |
| <i>circSORBS1</i> | miR-769-5p  | 2 |
| <i>circSORBS1</i> | miR-770-5p  | 1 |
| <i>circSORBS1</i> | miR-7703    | 1 |
| <i>circSORBS1</i> | miR-7847-3p | 1 |
| <i>circSORBS1</i> | miR-7851-3p | 3 |
| <i>circSORBS1</i> | miR-7854-3p | 2 |
| <i>circSORBS1</i> | miR-7855-5p | 1 |
| <i>circSORBS1</i> | miR-7973    | 1 |
| <i>circSORBS1</i> | miR-7976    | 3 |
| <i>circSORBS1</i> | miR-7977    | 4 |
| <i>circSORBS1</i> | miR-8057    | 2 |
| <i>circSORBS1</i> | miR-8065    | 1 |
| <i>circSORBS1</i> | miR-8066    | 1 |
| <i>circSORBS1</i> | miR-8075    | 1 |
| <i>circSORBS1</i> | miR-8076    | 1 |
| <i>circSORBS1</i> | miR-8077    | 1 |
| <i>circSORBS1</i> | miR-8080    | 1 |
| <i>circSORBS1</i> | miR-8083    | 2 |
| <i>circSORBS1</i> | miR-8084    | 2 |
| <i>circSORBS1</i> | miR-8087    | 2 |

|                   |                              |   |
|-------------------|------------------------------|---|
| <i>circSORBS1</i> | miR-873-5p.1                 | 4 |
| <i>circSORBS1</i> | miR-873-5p.2                 | 1 |
| <i>circSORBS1</i> | miR-874-3p                   | 1 |
| <i>circSORBS1</i> | miR-874-5p                   | 4 |
| <i>circSORBS1</i> | miR-875-3p                   | 1 |
| <i>circSORBS1</i> | miR-875-5p                   | 2 |
| <i>circSORBS1</i> | miR-876-3p                   | 1 |
| <i>circSORBS1</i> | miR-877-3p                   | 2 |
| <i>circSORBS1</i> | miR-885-3p                   | 1 |
| <i>circSORBS1</i> | miR-885-5p                   | 2 |
| <i>circSORBS1</i> | miR-887-5p                   | 1 |
| <i>circSORBS1</i> | miR-888-3p                   | 2 |
| <i>circSORBS1</i> | miR-889-3p                   | 1 |
| <i>circSORBS1</i> | miR-920/4300/5591-5p/6726-5p | 3 |
| <i>circSORBS1</i> | miR-922                      | 4 |
| <i>circSORBS1</i> | miR-924                      | 2 |
| <i>circSORBS1</i> | miR-936                      | 4 |
| <i>circSORBS1</i> | miR-937-5p                   | 1 |
| <i>circSORBS1</i> | miR-939-3p                   | 3 |
| <i>circSORBS1</i> | miR-940/6808-5p/6893-5p      | 1 |
| <i>circSORBS1</i> | miR-941                      | 1 |
| <i>circSORBS1</i> | miR-942-5p                   | 1 |
| <i>circSORBS1</i> | miR-95-5p                    | 1 |
| <i>circSORBS1</i> | miR-9500                     | 1 |
| <i>circSPHKAP</i> | let-7i-3p                    | 1 |
| <i>circSPHKAP</i> | miR-1-3p/206                 | 4 |
| <i>circSPHKAP</i> | miR-10-5p                    | 6 |
| <i>circSPHKAP</i> | miR-100-3p                   | 2 |
| <i>circSPHKAP</i> | miR-101-3p.2                 | 1 |
| <i>circSPHKAP</i> | miR-103-3p/107               | 2 |
| <i>circSPHKAP</i> | miR-103a-2-5p                | 2 |
| <i>circSPHKAP</i> | miR-105-5p                   | 1 |
| <i>circSPHKAP</i> | miR-1178-3p                  | 5 |
| <i>circSPHKAP</i> | miR-1179                     | 3 |
| <i>circSPHKAP</i> | miR-1183                     | 1 |
| <i>circSPHKAP</i> | miR-1184                     | 4 |
| <i>circSPHKAP</i> | miR-1185-5p                  | 2 |
| <i>circSPHKAP</i> | miR-1193                     | 1 |

|                   |                     |   |
|-------------------|---------------------|---|
| <i>circSPHKAP</i> | miR-1197            | 1 |
| <i>circSPHKAP</i> | miR-1199-5p/6751-3p | 3 |
| <i>circSPHKAP</i> | miR-1200            | 2 |
| <i>circSPHKAP</i> | miR-1202/3972       | 3 |
| <i>circSPHKAP</i> | miR-1204            | 1 |
| <i>circSPHKAP</i> | miR-1205            | 4 |
| <i>circSPHKAP</i> | miR-1206            | 1 |
| <i>circSPHKAP</i> | miR-1207-3p         | 2 |
| <i>circSPHKAP</i> | miR-1207-5p/4763-3p | 1 |
| <i>circSPHKAP</i> | miR-1208            | 2 |
| <i>circSPHKAP</i> | miR-122-5p          | 2 |
| <i>circSPHKAP</i> | miR-1224-5p         | 4 |
| <i>circSPHKAP</i> | miR-1225-3p         | 2 |
| <i>circSPHKAP</i> | miR-1226-5p         | 1 |
| <i>circSPHKAP</i> | miR-1227-3p         | 3 |
| <i>circSPHKAP</i> | miR-1228-3p         | 1 |
| <i>circSPHKAP</i> | miR-1231            | 1 |
| <i>circSPHKAP</i> | miR-1233-5p/6778-5p | 1 |
| <i>circSPHKAP</i> | miR-1234-3p/7107-5p | 1 |
| <i>circSPHKAP</i> | miR-1236-3p         | 2 |
| <i>circSPHKAP</i> | miR-1236-5p         | 2 |
| <i>circSPHKAP</i> | miR-1237-3p         | 2 |
| <i>circSPHKAP</i> | miR-1238-3p         | 1 |
| <i>circSPHKAP</i> | miR-1238-5p/4758-5p | 1 |
| <i>circSPHKAP</i> | miR-124-5p          | 1 |
| <i>circSPHKAP</i> | miR-1245a/8079      | 1 |
| <i>circSPHKAP</i> | miR-1245b-3p        | 3 |
| <i>circSPHKAP</i> | miR-1245b-5p        | 4 |
| <i>circSPHKAP</i> | miR-1246            | 1 |
| <i>circSPHKAP</i> | miR-1247-3p         | 1 |
| <i>circSPHKAP</i> | miR-1248            | 2 |
| <i>circSPHKAP</i> | miR-1249-5p/6797-5p | 1 |
| <i>circSPHKAP</i> | miR-125-5p          | 1 |
| <i>circSPHKAP</i> | miR-1251-3p         | 3 |
| <i>circSPHKAP</i> | miR-1251-5p         | 1 |
| <i>circSPHKAP</i> | miR-1252-3p         | 1 |
| <i>circSPHKAP</i> | miR-1252-5p         | 2 |
| <i>circSPHKAP</i> | miR-1253            | 6 |



|                   |                          |   |
|-------------------|--------------------------|---|
| <i>circSPHKAP</i> | miR-1254/3116            | 1 |
| <i>circSPHKAP</i> | miR-1255a/1255b-5p       | 3 |
| <i>circSPHKAP</i> | miR-1255b-2-3p           | 1 |
| <i>circSPHKAP</i> | miR-1256                 | 3 |
| <i>circSPHKAP</i> | miR-1257                 | 2 |
| <i>circSPHKAP</i> | miR-1258                 | 1 |
| <i>circSPHKAP</i> | miR-125a-3p              | 3 |
| <i>circSPHKAP</i> | miR-126-3p.1             | 1 |
| <i>circSPHKAP</i> | miR-126-5p               | 1 |
| <i>circSPHKAP</i> | miR-1260a/1260b          | 1 |
| <i>circSPHKAP</i> | miR-1261                 | 1 |
| <i>circSPHKAP</i> | miR-1262/4701-3p/6736-5p | 1 |
| <i>circSPHKAP</i> | miR-1264                 | 2 |
| <i>circSPHKAP</i> | miR-1265                 | 2 |
| <i>circSPHKAP</i> | miR-1266-3p              | 1 |
| <i>circSPHKAP</i> | miR-1266-5p/4518         | 1 |
| <i>circSPHKAP</i> | miR-1267                 | 1 |
| <i>circSPHKAP</i> | miR-1269                 | 1 |
| <i>circSPHKAP</i> | miR-127-5p               | 1 |
| <i>circSPHKAP</i> | miR-1270                 | 4 |
| <i>circSPHKAP</i> | miR-1272                 | 2 |
| <i>circSPHKAP</i> | miR-1273a                | 1 |
| <i>circSPHKAP</i> | miR-1273c                | 1 |
| <i>circSPHKAP</i> | miR-1273d                | 1 |
| <i>circSPHKAP</i> | miR-1273e                | 2 |
| <i>circSPHKAP</i> | miR-1273f                | 1 |
| <i>circSPHKAP</i> | miR-1273g-3p             | 3 |
| <i>circSPHKAP</i> | miR-1273g-5p             | 3 |
| <i>circSPHKAP</i> | miR-1273h-3p             | 3 |
| <i>circSPHKAP</i> | miR-1276                 | 5 |
| <i>circSPHKAP</i> | miR-1277-3p              | 1 |
| <i>circSPHKAP</i> | miR-1277-5p              | 2 |
| <i>circSPHKAP</i> | miR-1278                 | 1 |
| <i>circSPHKAP</i> | miR-1279                 | 1 |
| <i>circSPHKAP</i> | miR-128-3p               | 2 |
| <i>circSPHKAP</i> | miR-1283                 | 2 |
| <i>circSPHKAP</i> | miR-1284                 | 1 |
| <i>circSPHKAP</i> | miR-1285-5p              | 2 |

|                   |                     |   |
|-------------------|---------------------|---|
| <i>circSPHKAP</i> | miR-1286            | 3 |
| <i>circSPHKAP</i> | miR-1287-5p         | 1 |
| <i>circSPHKAP</i> | miR-1288-3p         | 1 |
| <i>circSPHKAP</i> | miR-1288-5p         | 2 |
| <i>circSPHKAP</i> | miR-1289            | 1 |
| <i>circSPHKAP</i> | miR-129-3p          | 2 |
| <i>circSPHKAP</i> | miR-129-5p          | 1 |
| <i>circSPHKAP</i> | miR-1290            | 1 |
| <i>circSPHKAP</i> | miR-1292-5p         | 1 |
| <i>circSPHKAP</i> | miR-1293/4483       | 1 |
| <i>circSPHKAP</i> | miR-1294            | 3 |
| <i>circSPHKAP</i> | miR-1295b-5p/1912   | 2 |
| <i>circSPHKAP</i> | miR-1296-3p         | 1 |
| <i>circSPHKAP</i> | miR-1298-5p         | 1 |
| <i>circSPHKAP</i> | miR-1299            | 3 |
| <i>circSPHKAP</i> | miR-1301-3p         | 4 |
| <i>circSPHKAP</i> | miR-1301-5p/6502-5p | 1 |
| <i>circSPHKAP</i> | miR-1302/4298       | 1 |
| <i>circSPHKAP</i> | miR-1304-5p         | 1 |
| <i>circSPHKAP</i> | miR-1306-5p         | 1 |
| <i>circSPHKAP</i> | miR-130b-5p         | 1 |
| <i>circSPHKAP</i> | miR-132-5p          | 1 |
| <i>circSPHKAP</i> | miR-1322            | 2 |
| <i>circSPHKAP</i> | miR-1323            | 2 |
| <i>circSPHKAP</i> | miR-1324            | 5 |
| <i>circSPHKAP</i> | miR-134-3p          | 1 |
| <i>circSPHKAP</i> | miR-1343-3p         | 1 |
| <i>circSPHKAP</i> | miR-135-5p          | 1 |
| <i>circSPHKAP</i> | miR-135b-3p         | 1 |
| <i>circSPHKAP</i> | miR-136-5p          | 4 |
| <i>circSPHKAP</i> | miR-138-2-3p        | 1 |
| <i>circSPHKAP</i> | miR-139-5p          | 2 |
| <i>circSPHKAP</i> | miR-140-3p.1        | 5 |
| <i>circSPHKAP</i> | miR-140-3p.2        | 4 |
| <i>circSPHKAP</i> | miR-140-5p          | 3 |
| <i>circSPHKAP</i> | miR-141-5p          | 1 |
| <i>circSPHKAP</i> | miR-143-3p          | 1 |
| <i>circSPHKAP</i> | miR-143-5p          | 3 |

|                   |                                      |   |
|-------------------|--------------------------------------|---|
| <i>circSPHKAP</i> | miR-145-3p                           | 2 |
| <i>circSPHKAP</i> | miR-145-5p                           | 2 |
| <i>circSPHKAP</i> | miR-146-5p                           | 1 |
| <i>circSPHKAP</i> | miR-1468-3p                          | 1 |
| <i>circSPHKAP</i> | miR-146a-3p                          | 3 |
| <i>circSPHKAP</i> | miR-1470                             | 1 |
| <i>circSPHKAP</i> | miR-147a                             | 1 |
| <i>circSPHKAP</i> | miR-148-3p/152-3p                    | 1 |
| <i>circSPHKAP</i> | miR-148a-5p                          | 3 |
| <i>circSPHKAP</i> | miR-148b-5p/6874-3p                  | 3 |
| <i>circSPHKAP</i> | miR-15-5p/16-5p/195-5p/424-5p/497-5p | 5 |
| <i>circSPHKAP</i> | miR-151-5p                           | 1 |
| <i>circSPHKAP</i> | miR-1587/3620-5p                     | 2 |
| <i>circSPHKAP</i> | miR-15b-3p                           | 1 |
| <i>circSPHKAP</i> | miR-17-3p                            | 4 |
| <i>circSPHKAP</i> | miR-17-5p/20-5p/93-5p/106-5p/519-3p  | 3 |
| <i>circSPHKAP</i> | miR-181-3p/4420                      | 1 |
| <i>circSPHKAP</i> | miR-181c-3p                          | 1 |
| <i>circSPHKAP</i> | miR-182-3p                           | 1 |
| <i>circSPHKAP</i> | miR-182-5p                           | 1 |
| <i>circSPHKAP</i> | miR-1825                             | 4 |
| <i>circSPHKAP</i> | miR-1827                             | 1 |
| <i>circSPHKAP</i> | miR-183-5p.1                         | 3 |
| <i>circSPHKAP</i> | miR-183-5p.2                         | 1 |
| <i>circSPHKAP</i> | miR-184                              | 1 |
| <i>circSPHKAP</i> | miR-185-3p                           | 1 |
| <i>circSPHKAP</i> | miR-185-5p                           | 5 |
| <i>circSPHKAP</i> | miR-186-5p                           | 3 |
| <i>circSPHKAP</i> | miR-188-3p                           | 1 |
| <i>circSPHKAP</i> | miR-188-5p                           | 1 |
| <i>circSPHKAP</i> | miR-18a-3p                           | 2 |
| <i>circSPHKAP</i> | miR-19-3p                            | 1 |
| <i>circSPHKAP</i> | miR-19-5p                            | 2 |
| <i>circSPHKAP</i> | miR-190-5p                           | 1 |
| <i>circSPHKAP</i> | miR-1909-3p/6722-3p                  | 2 |
| <i>circSPHKAP</i> | miR-1909-5p                          | 2 |
| <i>circSPHKAP</i> | miR-191-5p                           | 1 |
| <i>circSPHKAP</i> | miR-1910-5p                          | 4 |

|                   |                     |   |
|-------------------|---------------------|---|
| <i>circSPHKAP</i> | miR-1911-3p         | 3 |
| <i>circSPHKAP</i> | miR-1911-5p         | 1 |
| <i>circSPHKAP</i> | miR-1914-5p         | 2 |
| <i>circSPHKAP</i> | miR-1915-3p/6764-5p | 5 |
| <i>circSPHKAP</i> | miR-1915-5p         | 1 |
| <i>circSPHKAP</i> | miR-192-3p          | 2 |
| <i>circSPHKAP</i> | miR-192-5p/215-5p   | 1 |
| <i>circSPHKAP</i> | miR-193-3p          | 2 |
| <i>circSPHKAP</i> | miR-194-3p          | 6 |
| <i>circSPHKAP</i> | miR-196a-3p         | 1 |
| <i>circSPHKAP</i> | miR-196b-3p         | 3 |
| <i>circSPHKAP</i> | miR-197-3p          | 3 |
| <i>circSPHKAP</i> | miR-1972            | 2 |
| <i>circSPHKAP</i> | miR-1973            | 1 |
| <i>circSPHKAP</i> | miR-1976            | 1 |
| <i>circSPHKAP</i> | miR-198             | 3 |
| <i>circSPHKAP</i> | miR-199-3p          | 1 |
| <i>circSPHKAP</i> | miR-199-5p          | 4 |
| <i>circSPHKAP</i> | miR-202-5p          | 1 |
| <i>circSPHKAP</i> | miR-203a-5p         | 3 |
| <i>circSPHKAP</i> | miR-203b-3p         | 2 |
| <i>circSPHKAP</i> | miR-203b-5p/6718-5p | 5 |
| <i>circSPHKAP</i> | miR-2052            | 2 |
| <i>circSPHKAP</i> | miR-2053            | 1 |
| <i>circSPHKAP</i> | miR-208-5p          | 1 |
| <i>circSPHKAP</i> | miR-20a-3p          | 2 |
| <i>circSPHKAP</i> | miR-20b-3p          | 1 |
| <i>circSPHKAP</i> | miR-21-3p/3591-3p   | 1 |
| <i>circSPHKAP</i> | miR-21-5p/590-5p    | 1 |
| <i>circSPHKAP</i> | miR-211-3p          | 1 |
| <i>circSPHKAP</i> | miR-2110            | 2 |
| <i>circSPHKAP</i> | miR-2113            | 3 |
| <i>circSPHKAP</i> | miR-2114-3p         | 2 |
| <i>circSPHKAP</i> | miR-2115-3p         | 2 |
| <i>circSPHKAP</i> | miR-2115-5p         | 2 |
| <i>circSPHKAP</i> | miR-2117            | 2 |
| <i>circSPHKAP</i> | miR-214-3p/3619-5p  | 7 |
| <i>circSPHKAP</i> | miR-214-5p          | 2 |

|                   |                                     |   |
|-------------------|-------------------------------------|---|
| <i>circSPHKAP</i> | miR-215-3p                          | 1 |
| <i>circSPHKAP</i> | miR-216a-5p                         | 1 |
| <i>circSPHKAP</i> | miR-216b-3p                         | 1 |
| <i>circSPHKAP</i> | miR-216b-5p                         | 1 |
| <i>circSPHKAP</i> | miR-217                             | 2 |
| <i>circSPHKAP</i> | miR-218-1-3p                        | 1 |
| <i>circSPHKAP</i> | miR-218-2-3p                        | 1 |
| <i>circSPHKAP</i> | miR-218-5p                          | 3 |
| <i>circSPHKAP</i> | miR-219a-2-3p                       | 1 |
| <i>circSPHKAP</i> | miR-219b-3p                         | 1 |
| <i>circSPHKAP</i> | miR-219b-5p                         | 1 |
| <i>circSPHKAP</i> | miR-22-3p                           | 3 |
| <i>circSPHKAP</i> | miR-221-3p/222-3p                   | 2 |
| <i>circSPHKAP</i> | miR-221-5p/8073                     | 1 |
| <i>circSPHKAP</i> | miR-222-5p                          | 1 |
| <i>circSPHKAP</i> | miR-223-3p                          | 2 |
| <i>circSPHKAP</i> | miR-223-5p                          | 1 |
| <i>circSPHKAP</i> | miR-224-5p                          | 2 |
| <i>circSPHKAP</i> | miR-2276-3p                         | 2 |
| <i>circSPHKAP</i> | miR-2276-5p                         | 1 |
| <i>circSPHKAP</i> | miR-2277-3p                         | 3 |
| <i>circSPHKAP</i> | miR-2278                            | 3 |
| <i>circSPHKAP</i> | miR-23-5p                           | 1 |
| <i>circSPHKAP</i> | miR-2355-5p                         | 4 |
| <i>circSPHKAP</i> | miR-2392                            | 3 |
| <i>circSPHKAP</i> | miR-24-3p                           | 1 |
| <i>circSPHKAP</i> | miR-2467-3p                         | 7 |
| <i>circSPHKAP</i> | miR-2467-5p                         | 4 |
| <i>circSPHKAP</i> | miR-25-3p/32-5p/92-3p/363-3p/367-3p | 2 |
| <i>circSPHKAP</i> | miR-26-3p                           | 1 |
| <i>circSPHKAP</i> | miR-26-5p                           | 1 |
| <i>circSPHKAP</i> | miR-2681-3p                         | 2 |
| <i>circSPHKAP</i> | miR-2682-3p/6781-3p                 | 2 |
| <i>circSPHKAP</i> | miR-27-3p                           | 4 |
| <i>circSPHKAP</i> | miR-27a-5p                          | 1 |
| <i>circSPHKAP</i> | miR-27b-5p                          | 2 |
| <i>circSPHKAP</i> | miR-2861                            | 1 |
| <i>circSPHKAP</i> | miR-29-3p                           | 2 |

|                   |                                              |   |
|-------------------|----------------------------------------------|---|
| <i>circSPHKAP</i> | miR-2909                                     | 1 |
| <i>circSPHKAP</i> | miR-296-3p                                   | 1 |
| <i>circSPHKAP</i> | miR-298                                      | 2 |
| <i>circSPHKAP</i> | miR-299-3p                                   | 2 |
| <i>circSPHKAP</i> | miR-299-5p                                   | 1 |
| <i>circSPHKAP</i> | miR-29b-2-5p                                 | 4 |
| <i>circSPHKAP</i> | miR-30-5p                                    | 2 |
| <i>circSPHKAP</i> | miR-302-3p/372-3p/373-3p/520-3p              | 2 |
| <i>circSPHKAP</i> | miR-302a-5p                                  | 1 |
| <i>circSPHKAP</i> | miR-302c-3p.2/520-3p                         | 1 |
| <i>circSPHKAP</i> | miR-302c-5p                                  | 1 |
| <i>circSPHKAP</i> | miR-302f                                     | 2 |
| <i>circSPHKAP</i> | miR-3064-3p                                  | 2 |
| <i>circSPHKAP</i> | miR-3064-5p                                  | 1 |
| <i>circSPHKAP</i> | miR-3065-3p                                  | 1 |
| <i>circSPHKAP</i> | miR-3065-5p                                  | 3 |
| <i>circSPHKAP</i> | miR-3074-5p                                  | 2 |
| <i>circSPHKAP</i> | miR-30b-3p/1273h-5p/3689-3p/6779-5p/6780a-5p |   |
| <i>circSPHKAP</i> | miR-30c-3p/6788-5p                           | 1 |
| <i>circSPHKAP</i> | miR-31-5p                                    | 3 |
| <i>circSPHKAP</i> | miR-3117-5p                                  | 1 |
| <i>circSPHKAP</i> | miR-3119                                     | 2 |
| <i>circSPHKAP</i> | miR-3120-3p                                  | 3 |
| <i>circSPHKAP</i> | miR-3120-5p                                  | 3 |
| <i>circSPHKAP</i> | miR-3121-3p                                  | 1 |
| <i>circSPHKAP</i> | miR-3121-5p                                  | 1 |
| <i>circSPHKAP</i> | miR-3123                                     | 7 |
| <i>circSPHKAP</i> | miR-3124-3p                                  | 3 |
| <i>circSPHKAP</i> | miR-3125/3916/6859-5p                        | 6 |
| <i>circSPHKAP</i> | miR-3126-5p                                  | 4 |
| <i>circSPHKAP</i> | miR-3128                                     | 3 |
| <i>circSPHKAP</i> | miR-3130-5p/4482-5p                          | 2 |
| <i>circSPHKAP</i> | miR-3133                                     | 3 |
| <i>circSPHKAP</i> | miR-3134                                     | 4 |
| <i>circSPHKAP</i> | miR-3135a                                    | 1 |
| <i>circSPHKAP</i> | miR-3135b                                    | 1 |
| <i>circSPHKAP</i> | miR-3137                                     | 1 |
| <i>circSPHKAP</i> | miR-3138                                     | 1 |

|                   |                           |   |
|-------------------|---------------------------|---|
| <i>circSPHKAP</i> | miR-3140-3p               | 2 |
| <i>circSPHKAP</i> | miR-3140-5p               | 1 |
| <i>circSPHKAP</i> | miR-3145-5p               | 3 |
| <i>circSPHKAP</i> | miR-3146                  | 1 |
| <i>circSPHKAP</i> | miR-3148                  | 7 |
| <i>circSPHKAP</i> | miR-3149                  | 1 |
| <i>circSPHKAP</i> | miR-3150a-3p              | 2 |
| <i>circSPHKAP</i> | miR-3150a-5p/3150b-5p     | 1 |
| <i>circSPHKAP</i> | miR-3150b-3p              | 2 |
| <i>circSPHKAP</i> | miR-3151-3p               | 1 |
| <i>circSPHKAP</i> | miR-3151-5p               | 1 |
| <i>circSPHKAP</i> | miR-3152-5p               | 1 |
| <i>circSPHKAP</i> | miR-3154                  | 2 |
| <i>circSPHKAP</i> | miR-3156-3p               | 1 |
| <i>circSPHKAP</i> | miR-3156-5p               | 1 |
| <i>circSPHKAP</i> | miR-3157-5p               | 4 |
| <i>circSPHKAP</i> | miR-3158-3p               | 1 |
| <i>circSPHKAP</i> | miR-3158-5p               | 4 |
| <i>circSPHKAP</i> | miR-3159                  | 2 |
| <i>circSPHKAP</i> | miR-3160-3p               | 1 |
| <i>circSPHKAP</i> | miR-3161                  | 1 |
| <i>circSPHKAP</i> | miR-3165                  | 5 |
| <i>circSPHKAP</i> | miR-3166                  | 2 |
| <i>circSPHKAP</i> | miR-3168                  | 3 |
| <i>circSPHKAP</i> | miR-3169                  | 1 |
| <i>circSPHKAP</i> | miR-3171                  | 1 |
| <i>circSPHKAP</i> | miR-3173-3p/6891-5p       | 3 |
| <i>circSPHKAP</i> | miR-3174                  | 4 |
| <i>circSPHKAP</i> | miR-3175                  | 1 |
| <i>circSPHKAP</i> | miR-3176/3922-3p          | 1 |
| <i>circSPHKAP</i> | miR-3179                  | 2 |
| <i>circSPHKAP</i> | miR-3180-5p               | 2 |
| <i>circSPHKAP</i> | miR-3182                  | 2 |
| <i>circSPHKAP</i> | miR-3183/4723-3p/6769b-3p | 1 |
| <i>circSPHKAP</i> | miR-3184-3p               | 2 |
| <i>circSPHKAP</i> | miR-3185                  | 2 |
| <i>circSPHKAP</i> | miR-3186-5p               | 1 |
| <i>circSPHKAP</i> | miR-3187-3p               | 1 |

|                   |                           |   |
|-------------------|---------------------------|---|
| <i>circSPHKAP</i> | miR-3188                  | 4 |
| <i>circSPHKAP</i> | miR-3189-5p               | 1 |
| <i>circSPHKAP</i> | miR-3190-3p               | 3 |
| <i>circSPHKAP</i> | miR-3190-5p               | 1 |
| <i>circSPHKAP</i> | miR-3191-5p               | 5 |
| <i>circSPHKAP</i> | miR-3192-3p               | 2 |
| <i>circSPHKAP</i> | miR-3193                  | 2 |
| <i>circSPHKAP</i> | miR-3194-3p               | 2 |
| <i>circSPHKAP</i> | miR-3194-5p               | 4 |
| <i>circSPHKAP</i> | miR-3198/4309             | 1 |
| <i>circSPHKAP</i> | miR-3199/8052             | 1 |
| <i>circSPHKAP</i> | miR-320                   | 1 |
| <i>circSPHKAP</i> | miR-3200-3p               | 1 |
| <i>circSPHKAP</i> | miR-3200-5p               | 4 |
| <i>circSPHKAP</i> | miR-320e                  | 4 |
| <i>circSPHKAP</i> | miR-323-3p                | 2 |
| <i>circSPHKAP</i> | miR-323b-3p               | 1 |
| <i>circSPHKAP</i> | miR-323b-5p/410-5p/494-5p | 1 |
| <i>circSPHKAP</i> | miR-324-3p/1913           | 2 |
| <i>circSPHKAP</i> | miR-324-5p                | 2 |
| <i>circSPHKAP</i> | miR-326                   | 2 |
| <i>circSPHKAP</i> | miR-33-5p                 | 2 |
| <i>circSPHKAP</i> | miR-330-3p                | 2 |
| <i>circSPHKAP</i> | miR-330-3p.2              | 3 |
| <i>circSPHKAP</i> | miR-335-5p                | 1 |
| <i>circSPHKAP</i> | miR-338-3p                | 4 |
| <i>circSPHKAP</i> | miR-339-3p                | 1 |
| <i>circSPHKAP</i> | miR-339-5p                | 3 |
| <i>circSPHKAP</i> | miR-33a-3p                | 2 |
| <i>circSPHKAP</i> | miR-33b-3p/515-3p/519e-3p | 4 |
| <i>circSPHKAP</i> | miR-34-5p/449-5p          | 1 |
| <i>circSPHKAP</i> | miR-340-5p                | 1 |
| <i>circSPHKAP</i> | miR-345-3p                | 1 |
| <i>circSPHKAP</i> | miR-345-5p                | 2 |
| <i>circSPHKAP</i> | miR-34b-3p                | 2 |
| <i>circSPHKAP</i> | miR-34c-3p                | 2 |
| <i>circSPHKAP</i> | miR-3529-3p               | 3 |
| <i>circSPHKAP</i> | miR-3605-5p               | 2 |



|                   |                                   |   |
|-------------------|-----------------------------------|---|
| <i>circSPHKAP</i> | miR-3607-3p                       | 1 |
| <i>circSPHKAP</i> | miR-3607-5p                       | 2 |
| <i>circSPHKAP</i> | miR-361-3p                        | 3 |
| <i>circSPHKAP</i> | miR-3610                          | 1 |
| <i>circSPHKAP</i> | miR-3612                          | 2 |
| <i>circSPHKAP</i> | miR-3613-3p                       | 3 |
| <i>circSPHKAP</i> | miR-3614-3p                       | 1 |
| <i>circSPHKAP</i> | miR-3615                          | 1 |
| <i>circSPHKAP</i> | miR-362-5p/500b-5p                | 1 |
| <i>circSPHKAP</i> | miR-3620-3p                       | 5 |
| <i>circSPHKAP</i> | miR-3622a-5p                      | 1 |
| <i>circSPHKAP</i> | miR-3622b-5p                      | 3 |
| <i>circSPHKAP</i> | miR-363-5p/6745                   | 1 |
| <i>circSPHKAP</i> | miR-3646                          | 1 |
| <i>circSPHKAP</i> | miR-3649                          | 1 |
| <i>circSPHKAP</i> | miR-3653-5p                       | 1 |
| <i>circSPHKAP</i> | miR-3655                          | 1 |
| <i>circSPHKAP</i> | miR-365a-5p/365b-5p               | 1 |
| <i>circSPHKAP</i> | miR-3660/4526                     | 2 |
| <i>circSPHKAP</i> | miR-3662                          | 3 |
| <i>circSPHKAP</i> | miR-3663-3p                       | 2 |
| <i>circSPHKAP</i> | miR-3664-3p                       | 1 |
| <i>circSPHKAP</i> | miR-3664-5p                       | 2 |
| <i>circSPHKAP</i> | miR-3667-3p                       | 2 |
| <i>circSPHKAP</i> | miR-367-5p                        | 1 |
| <i>circSPHKAP</i> | miR-3670                          | 1 |
| <i>circSPHKAP</i> | miR-3671                          | 1 |
| <i>circSPHKAP</i> | miR-3677-5p                       | 5 |
| <i>circSPHKAP</i> | miR-3678-3p                       | 3 |
| <i>circSPHKAP</i> | miR-3679-3p                       | 1 |
| <i>circSPHKAP</i> | miR-3681-5p                       | 2 |
| <i>circSPHKAP</i> | miR-3682-3p                       | 1 |
| <i>circSPHKAP</i> | miR-3683                          | 1 |
| <i>circSPHKAP</i> | miR-3685                          | 1 |
| <i>circSPHKAP</i> | miR-3686                          | 1 |
| <i>circSPHKAP</i> | miR-3688-3p                       | 8 |
| <i>circSPHKAP</i> | miR-3688-5p                       | 4 |
| <i>circSPHKAP</i> | miR-3689a-5p/3689b-5p/3689e/3689f | 1 |

|                   |                           |   |
|-------------------|---------------------------|---|
| <i>circSPHKAP</i> | miR-369-5p                | 1 |
| <i>circSPHKAP</i> | miR-3691-3p               | 1 |
| <i>circSPHKAP</i> | miR-3691-5p               | 3 |
| <i>circSPHKAP</i> | miR-3692-3p               | 1 |
| <i>circSPHKAP</i> | miR-3692-5p               | 4 |
| <i>circSPHKAP</i> | miR-370-3p                | 4 |
| <i>circSPHKAP</i> | miR-371-5p                | 1 |
| <i>circSPHKAP</i> | miR-3713                  | 1 |
| <i>circSPHKAP</i> | miR-371a-3p               | 4 |
| <i>circSPHKAP</i> | miR-371b-3p               | 4 |
| <i>circSPHKAP</i> | miR-371b-5p/373-5p/616-5p | 1 |
| <i>circSPHKAP</i> | miR-372-5p                | 1 |
| <i>circSPHKAP</i> | miR-374-5p/655-3p         | 1 |
| <i>circSPHKAP</i> | miR-374a-3p               | 2 |
| <i>circSPHKAP</i> | miR-374b-3p               | 4 |
| <i>circSPHKAP</i> | miR-374c-3p               | 1 |
| <i>circSPHKAP</i> | miR-376a-2-5p             | 3 |
| <i>circSPHKAP</i> | miR-376a-5p               | 3 |
| <i>circSPHKAP</i> | miR-376b-5p/376c-5p       | 1 |
| <i>circSPHKAP</i> | miR-377-3p                | 1 |
| <i>circSPHKAP</i> | miR-378-3p                | 2 |
| <i>circSPHKAP</i> | miR-378a-5p               | 2 |
| <i>circSPHKAP</i> | miR-378g                  | 1 |
| <i>circSPHKAP</i> | miR-378j/6839-5p          | 1 |
| <i>circSPHKAP</i> | miR-381-3p                | 1 |
| <i>circSPHKAP</i> | miR-382-3p                | 2 |
| <i>circSPHKAP</i> | miR-383-3p                | 1 |
| <i>circSPHKAP</i> | miR-383-5p.1              | 1 |
| <i>circSPHKAP</i> | miR-383-5p.2              | 3 |
| <i>circSPHKAP</i> | miR-384                   | 1 |
| <i>circSPHKAP</i> | miR-3907                  | 1 |
| <i>circSPHKAP</i> | miR-3908                  | 1 |
| <i>circSPHKAP</i> | miR-3909                  | 1 |
| <i>circSPHKAP</i> | miR-3911                  | 1 |
| <i>circSPHKAP</i> | miR-3912-5p               | 1 |
| <i>circSPHKAP</i> | miR-3913-3p               | 2 |
| <i>circSPHKAP</i> | miR-3914                  | 1 |
| <i>circSPHKAP</i> | miR-3915                  | 4 |

|                   |                     |   |
|-------------------|---------------------|---|
| <i>circSPHKAP</i> | miR-3918            | 3 |
| <i>circSPHKAP</i> | miR-3919            | 5 |
| <i>circSPHKAP</i> | miR-3922-5p         | 1 |
| <i>circSPHKAP</i> | miR-3925-3p         | 7 |
| <i>circSPHKAP</i> | miR-3925-5p         | 7 |
| <i>circSPHKAP</i> | miR-3926            | 1 |
| <i>circSPHKAP</i> | miR-3928-3p         | 7 |
| <i>circSPHKAP</i> | miR-3928-5p/6806-3p | 3 |
| <i>circSPHKAP</i> | miR-3929/4419b/4478 | 3 |
| <i>circSPHKAP</i> | miR-3934-3p         | 4 |
| <i>circSPHKAP</i> | miR-3934-5p         | 3 |
| <i>circSPHKAP</i> | miR-3937            | 2 |
| <i>circSPHKAP</i> | miR-3942-3p         | 3 |
| <i>circSPHKAP</i> | miR-3942-5p         | 1 |
| <i>circSPHKAP</i> | miR-3943            | 1 |
| <i>circSPHKAP</i> | miR-3944-5p         | 3 |
| <i>circSPHKAP</i> | miR-3945            | 1 |
| <i>circSPHKAP</i> | miR-3973            | 1 |
| <i>circSPHKAP</i> | miR-3974            | 2 |
| <i>circSPHKAP</i> | miR-3975            | 4 |
| <i>circSPHKAP</i> | miR-3977            | 5 |
| <i>circSPHKAP</i> | miR-3978            | 8 |
| <i>circSPHKAP</i> | miR-409-5p          | 1 |
| <i>circSPHKAP</i> | miR-410-3p          | 1 |
| <i>circSPHKAP</i> | miR-412-3p/6754-3p  | 1 |
| <i>circSPHKAP</i> | miR-421             | 3 |
| <i>circSPHKAP</i> | miR-425-5p          | 2 |
| <i>circSPHKAP</i> | miR-4251            | 1 |
| <i>circSPHKAP</i> | miR-4252            | 2 |
| <i>circSPHKAP</i> | miR-4253/6862-5p    | 1 |
| <i>circSPHKAP</i> | miR-4255            | 1 |
| <i>circSPHKAP</i> | miR-4256            | 1 |
| <i>circSPHKAP</i> | miR-4257            | 1 |
| <i>circSPHKAP</i> | miR-4258            | 1 |
| <i>circSPHKAP</i> | miR-4261            | 2 |
| <i>circSPHKAP</i> | miR-4263            | 2 |
| <i>circSPHKAP</i> | miR-4264            | 4 |
| <i>circSPHKAP</i> | miR-4265/4296/4322  | 1 |

|                   |                           |   |
|-------------------|---------------------------|---|
| <i>circSPHKAP</i> | miR-4267                  | 2 |
| <i>circSPHKAP</i> | miR-4269/6715b-5p         | 3 |
| <i>circSPHKAP</i> | miR-4270/4441/6754-5p     | 1 |
| <i>circSPHKAP</i> | miR-4271/4725-3p/6780b-5p | 2 |
| <i>circSPHKAP</i> | miR-4272                  | 1 |
| <i>circSPHKAP</i> | miR-4274                  | 3 |
| <i>circSPHKAP</i> | miR-4275                  | 1 |
| <i>circSPHKAP</i> | miR-4276                  | 4 |
| <i>circSPHKAP</i> | miR-4278                  | 1 |
| <i>circSPHKAP</i> | miR-4279                  | 2 |
| <i>circSPHKAP</i> | miR-4281                  | 1 |
| <i>circSPHKAP</i> | miR-4284                  | 1 |
| <i>circSPHKAP</i> | miR-4286                  | 3 |
| <i>circSPHKAP</i> | miR-4287/4685-3p          | 2 |
| <i>circSPHKAP</i> | miR-4289                  | 1 |
| <i>circSPHKAP</i> | miR-4290                  | 1 |
| <i>circSPHKAP</i> | miR-4291                  | 1 |
| <i>circSPHKAP</i> | miR-4292/6791-5p          | 1 |
| <i>circSPHKAP</i> | miR-4293                  | 3 |
| <i>circSPHKAP</i> | miR-4294                  | 1 |
| <i>circSPHKAP</i> | miR-4299                  | 1 |
| <i>circSPHKAP</i> | miR-4301                  | 1 |
| <i>circSPHKAP</i> | miR-4302                  | 4 |
| <i>circSPHKAP</i> | miR-4304                  | 1 |
| <i>circSPHKAP</i> | miR-4305                  | 1 |
| <i>circSPHKAP</i> | miR-4307                  | 1 |
| <i>circSPHKAP</i> | miR-4308                  | 1 |
| <i>circSPHKAP</i> | miR-431-5p                | 1 |
| <i>circSPHKAP</i> | miR-4310/7157-5p          | 2 |
| <i>circSPHKAP</i> | miR-4311                  | 5 |
| <i>circSPHKAP</i> | miR-4312                  | 2 |
| <i>circSPHKAP</i> | miR-4313                  | 2 |
| <i>circSPHKAP</i> | miR-4314                  | 1 |
| <i>circSPHKAP</i> | miR-4316                  | 3 |
| <i>circSPHKAP</i> | miR-4317                  | 1 |
| <i>circSPHKAP</i> | miR-4318                  | 2 |
| <i>circSPHKAP</i> | miR-432-3p                | 3 |
| <i>circSPHKAP</i> | miR-432-5p                | 1 |

|                   |                                              |   |
|-------------------|----------------------------------------------|---|
| <i>circSPHKAP</i> | miR-4323                                     | 1 |
| <i>circSPHKAP</i> | miR-4324                                     | 4 |
| <i>circSPHKAP</i> | miR-4325                                     | 1 |
| <i>circSPHKAP</i> | miR-4329                                     | 1 |
| <i>circSPHKAP</i> | miR-433-3p                                   | 2 |
| <i>circSPHKAP</i> | miR-4330                                     | 3 |
| <i>circSPHKAP</i> | miR-4417                                     | 2 |
| <i>circSPHKAP</i> | miR-4419a/4510/6127/6129/6130/6133           | 4 |
| <i>circSPHKAP</i> | miR-4421/5699-3p                             | 2 |
| <i>circSPHKAP</i> | miR-4422                                     | 3 |
| <i>circSPHKAP</i> | miR-4424                                     | 1 |
| <i>circSPHKAP</i> | miR-4426/4647/4662b                          | 5 |
| <i>circSPHKAP</i> | miR-4427                                     | 1 |
| <i>circSPHKAP</i> | miR-4428                                     | 3 |
| <i>circSPHKAP</i> | miR-4432                                     | 3 |
| <i>circSPHKAP</i> | miR-4433a-3p                                 | 5 |
| <i>circSPHKAP</i> | miR-4433a-5p                                 | 1 |
| <i>circSPHKAP</i> | miR-4433b-3p                                 | 2 |
| <i>circSPHKAP</i> | miR-4433b-5p                                 | 2 |
| <i>circSPHKAP</i> | miR-4434/4516/5703                           | 2 |
| <i>circSPHKAP</i> | miR-4435                                     | 1 |
| <i>circSPHKAP</i> | miR-4436b-3p/4632-5p/6735-5p/6879-5p/7843-5p |   |
| <i>circSPHKAP</i> | miR-4436b-5p                                 | 1 |
| <i>circSPHKAP</i> | miR-4438                                     | 4 |
| <i>circSPHKAP</i> | miR-4446-3p                                  | 1 |
| <i>circSPHKAP</i> | miR-4446-5p                                  | 1 |
| <i>circSPHKAP</i> | miR-4447/4472                                | 1 |
| <i>circSPHKAP</i> | miR-4450                                     | 1 |
| <i>circSPHKAP</i> | miR-4453/4538                                | 3 |
| <i>circSPHKAP</i> | miR-4454                                     | 1 |
| <i>circSPHKAP</i> | miR-4456                                     | 1 |
| <i>circSPHKAP</i> | miR-4457                                     | 3 |
| <i>circSPHKAP</i> | miR-4459                                     | 5 |
| <i>circSPHKAP</i> | miR-4461                                     | 1 |
| <i>circSPHKAP</i> | miR-4462                                     | 1 |
| <i>circSPHKAP</i> | miR-4468                                     | 4 |
| <i>circSPHKAP</i> | miR-4469                                     | 2 |
| <i>circSPHKAP</i> | miR-4471/8059                                | 1 |

|                   |                  |   |
|-------------------|------------------|---|
| <i>circSPHKAP</i> | miR-4474-3p      | 3 |
| <i>circSPHKAP</i> | miR-4475         | 3 |
| <i>circSPHKAP</i> | miR-4476/6876-5p | 7 |
| <i>circSPHKAP</i> | miR-4480         | 3 |
| <i>circSPHKAP</i> | miR-4481/4745-5p | 1 |
| <i>circSPHKAP</i> | miR-4484         | 1 |
| <i>circSPHKAP</i> | miR-4485-5p      | 1 |
| <i>circSPHKAP</i> | miR-4486         | 1 |
| <i>circSPHKAP</i> | miR-4487         | 1 |
| <i>circSPHKAP</i> | miR-4491/4657    | 2 |
| <i>circSPHKAP</i> | miR-4493         | 1 |
| <i>circSPHKAP</i> | miR-4494         | 1 |
| <i>circSPHKAP</i> | miR-4495         | 1 |
| <i>circSPHKAP</i> | miR-4496         | 4 |
| <i>circSPHKAP</i> | miR-4497         | 1 |
| <i>circSPHKAP</i> | miR-449c-3p      | 1 |
| <i>circSPHKAP</i> | miR-450-5p       | 1 |
| <i>circSPHKAP</i> | miR-4501         | 1 |
| <i>circSPHKAP</i> | miR-4502         | 2 |
| <i>circSPHKAP</i> | miR-4504         | 1 |
| <i>circSPHKAP</i> | miR-4506         | 1 |
| <i>circSPHKAP</i> | miR-4509         | 1 |
| <i>circSPHKAP</i> | miR-4511         | 4 |
| <i>circSPHKAP</i> | miR-4512         | 2 |
| <i>circSPHKAP</i> | miR-4513/6855-3p | 1 |
| <i>circSPHKAP</i> | miR-4514/4692    | 3 |
| <i>circSPHKAP</i> | miR-4515         | 1 |
| <i>circSPHKAP</i> | miR-4517         | 1 |
| <i>circSPHKAP</i> | miR-4519         | 3 |
| <i>circSPHKAP</i> | miR-451b         | 3 |
| <i>circSPHKAP</i> | miR-452-3p       | 2 |
| <i>circSPHKAP</i> | miR-4520-2-3p    | 2 |
| <i>circSPHKAP</i> | miR-4520-3p      | 3 |
| <i>circSPHKAP</i> | miR-4521         | 1 |
| <i>circSPHKAP</i> | miR-4522         | 2 |
| <i>circSPHKAP</i> | miR-4524-5p      | 3 |
| <i>circSPHKAP</i> | miR-4524a-3p     | 4 |
| <i>circSPHKAP</i> | miR-4524b-3p     | 4 |

|                   |                       |   |
|-------------------|-----------------------|---|
| <i>circSPHKAP</i> | miR-4527/6503-5p      | 1 |
| <i>circSPHKAP</i> | miR-4528              | 1 |
| <i>circSPHKAP</i> | miR-4529-3p           | 2 |
| <i>circSPHKAP</i> | miR-4530              | 4 |
| <i>circSPHKAP</i> | miR-4531              | 4 |
| <i>circSPHKAP</i> | miR-4534/8082         | 4 |
| <i>circSPHKAP</i> | miR-4536-3p           | 1 |
| <i>circSPHKAP</i> | miR-4536-5p           | 1 |
| <i>circSPHKAP</i> | miR-4537              | 1 |
| <i>circSPHKAP</i> | miR-4539              | 2 |
| <i>circSPHKAP</i> | miR-454-5p            | 2 |
| <i>circSPHKAP</i> | miR-455-3p.1          | 4 |
| <i>circSPHKAP</i> | miR-455-3p.2          | 3 |
| <i>circSPHKAP</i> | miR-455-5p            | 3 |
| <i>circSPHKAP</i> | miR-4633-3p/6500-5p   | 1 |
| <i>circSPHKAP</i> | miR-4635              | 2 |
| <i>circSPHKAP</i> | miR-4638-3p           | 2 |
| <i>circSPHKAP</i> | miR-4640-5p           | 2 |
| <i>circSPHKAP</i> | miR-4641              | 1 |
| <i>circSPHKAP</i> | miR-4642              | 2 |
| <i>circSPHKAP</i> | miR-4643              | 1 |
| <i>circSPHKAP</i> | miR-4645-3p           | 2 |
| <i>circSPHKAP</i> | miR-4645-5p/4673      | 3 |
| <i>circSPHKAP</i> | miR-4648              | 1 |
| <i>circSPHKAP</i> | miR-4649-3p           | 6 |
| <i>circSPHKAP</i> | miR-4650-5p           | 2 |
| <i>circSPHKAP</i> | miR-4652-3p           | 2 |
| <i>circSPHKAP</i> | miR-4653-3p           | 2 |
| <i>circSPHKAP</i> | miR-4654/4769-5p      | 1 |
| <i>circSPHKAP</i> | miR-4655-3p           | 1 |
| <i>circSPHKAP</i> | miR-4658/6790-5p      | 1 |
| <i>circSPHKAP</i> | miR-4659a-3p/4659b-3p | 1 |
| <i>circSPHKAP</i> | miR-466               | 1 |
| <i>circSPHKAP</i> | miR-4660              | 2 |
| <i>circSPHKAP</i> | miR-4662a-3p          | 1 |
| <i>circSPHKAP</i> | miR-4663              | 4 |
| <i>circSPHKAP</i> | miR-4666a-3p          | 1 |
| <i>circSPHKAP</i> | miR-4666a-5p          | 1 |

|                   |                          |   |
|-------------------|--------------------------|---|
| <i>circSPHKAP</i> | miR-4666b                | 2 |
| <i>circSPHKAP</i> | miR-4667-3p              | 1 |
| <i>circSPHKAP</i> | miR-4667-5p/4700-5p/8089 | 1 |
| <i>circSPHKAP</i> | miR-4668-3p              | 3 |
| <i>circSPHKAP</i> | miR-4670-3p              | 3 |
| <i>circSPHKAP</i> | miR-4671-5p              | 1 |
| <i>circSPHKAP</i> | miR-4674                 | 2 |
| <i>circSPHKAP</i> | miR-4677-3p              | 3 |
| <i>circSPHKAP</i> | miR-4679                 | 3 |
| <i>circSPHKAP</i> | miR-4680-3p              | 1 |
| <i>circSPHKAP</i> | miR-4680-5p              | 2 |
| <i>circSPHKAP</i> | miR-4682                 | 1 |
| <i>circSPHKAP</i> | miR-4684-5p              | 1 |
| <i>circSPHKAP</i> | miR-4685-5p/6837-5p      | 3 |
| <i>circSPHKAP</i> | miR-4686                 | 2 |
| <i>circSPHKAP</i> | miR-4687-3p              | 1 |
| <i>circSPHKAP</i> | miR-4687-5p              | 2 |
| <i>circSPHKAP</i> | miR-4689/6858-5p         | 4 |
| <i>circSPHKAP</i> | miR-4690-3p/5685         | 2 |
| <i>circSPHKAP</i> | miR-4690-5p              | 3 |
| <i>circSPHKAP</i> | miR-4691-3p              | 9 |
| <i>circSPHKAP</i> | miR-4691-5p/6792-3p      | 4 |
| <i>circSPHKAP</i> | miR-4693-3p              | 1 |
| <i>circSPHKAP</i> | miR-4694-3p              | 2 |
| <i>circSPHKAP</i> | miR-4695-3p              | 1 |
| <i>circSPHKAP</i> | miR-4695-5p              | 3 |
| <i>circSPHKAP</i> | miR-4696                 | 2 |
| <i>circSPHKAP</i> | miR-4697-3p              | 2 |
| <i>circSPHKAP</i> | miR-4698                 | 3 |
| <i>circSPHKAP</i> | miR-4699-5p              | 2 |
| <i>circSPHKAP</i> | miR-4700-3p              | 1 |
| <i>circSPHKAP</i> | miR-4704-3p              | 2 |
| <i>circSPHKAP</i> | miR-4707-5p              | 2 |
| <i>circSPHKAP</i> | miR-4708-3p              | 1 |
| <i>circSPHKAP</i> | miR-4708-5p              | 1 |
| <i>circSPHKAP</i> | miR-4709-3p              | 3 |
| <i>circSPHKAP</i> | miR-4709-5p              | 3 |
| <i>circSPHKAP</i> | miR-4710                 | 1 |



|                   |                             |   |
|-------------------|-----------------------------|---|
| <i>circSPHKAP</i> | miR-4711-5p                 | 3 |
| <i>circSPHKAP</i> | miR-4713-5p                 | 2 |
| <i>circSPHKAP</i> | miR-4714-3p                 | 2 |
| <i>circSPHKAP</i> | miR-4714-5p                 | 2 |
| <i>circSPHKAP</i> | miR-4715-3p                 | 2 |
| <i>circSPHKAP</i> | miR-4717-5p                 | 3 |
| <i>circSPHKAP</i> | miR-4719                    | 3 |
| <i>circSPHKAP</i> | miR-4720-3p                 | 2 |
| <i>circSPHKAP</i> | miR-4720-5p/4799-3p/5588-5p | 3 |
| <i>circSPHKAP</i> | miR-4722-3p/6727-3p         | 1 |
| <i>circSPHKAP</i> | miR-4722-5p                 | 3 |
| <i>circSPHKAP</i> | miR-4724-3p                 | 1 |
| <i>circSPHKAP</i> | miR-4724-5p                 | 2 |
| <i>circSPHKAP</i> | miR-4725-5p                 | 2 |
| <i>circSPHKAP</i> | miR-4726-3p                 | 5 |
| <i>circSPHKAP</i> | miR-4728-3p                 | 3 |
| <i>circSPHKAP</i> | miR-4729                    | 1 |
| <i>circSPHKAP</i> | miR-4731-3p/4801            | 3 |
| <i>circSPHKAP</i> | miR-4731-5p                 | 1 |
| <i>circSPHKAP</i> | miR-4732-3p                 | 1 |
| <i>circSPHKAP</i> | miR-4733-5p                 | 2 |
| <i>circSPHKAP</i> | miR-4736                    | 1 |
| <i>circSPHKAP</i> | miR-4737                    | 1 |
| <i>circSPHKAP</i> | miR-4738-3p                 | 2 |
| <i>circSPHKAP</i> | miR-4739                    | 5 |
| <i>circSPHKAP</i> | miR-4740-3p                 | 1 |
| <i>circSPHKAP</i> | miR-4740-5p                 | 1 |
| <i>circSPHKAP</i> | miR-4742-3p                 | 1 |
| <i>circSPHKAP</i> | miR-4742-5p                 | 3 |
| <i>circSPHKAP</i> | miR-4743-3p                 | 2 |
| <i>circSPHKAP</i> | miR-4744                    | 1 |
| <i>circSPHKAP</i> | miR-4747-5p/5196-5p         | 1 |
| <i>circSPHKAP</i> | miR-4750-3p                 | 1 |
| <i>circSPHKAP</i> | miR-4752                    | 3 |
| <i>circSPHKAP</i> | miR-4753-3p                 | 1 |
| <i>circSPHKAP</i> | miR-4753-5p                 | 2 |
| <i>circSPHKAP</i> | miR-4754                    | 1 |
| <i>circSPHKAP</i> | miR-4755-3p                 | 6 |

|                   |                     |   |
|-------------------|---------------------|---|
| <i>circSPHKAP</i> | miR-4756-3p         | 5 |
| <i>circSPHKAP</i> | miR-4757-5p/6744-3p | 2 |
| <i>circSPHKAP</i> | miR-4758-3p         | 1 |
| <i>circSPHKAP</i> | miR-4759            | 1 |
| <i>circSPHKAP</i> | miR-4760-3p         | 2 |
| <i>circSPHKAP</i> | miR-4760-5p/8061    | 4 |
| <i>circSPHKAP</i> | miR-4761-3p         | 1 |
| <i>circSPHKAP</i> | miR-4762-3p         | 3 |
| <i>circSPHKAP</i> | miR-4762-5p         | 2 |
| <i>circSPHKAP</i> | miR-4763-5p         | 2 |
| <i>circSPHKAP</i> | miR-4764-5p         | 1 |
| <i>circSPHKAP</i> | miR-4765            | 2 |
| <i>circSPHKAP</i> | miR-4766-3p         | 2 |
| <i>circSPHKAP</i> | miR-4766-5p         | 3 |
| <i>circSPHKAP</i> | miR-4768-3p         | 5 |
| <i>circSPHKAP</i> | miR-4768-5p/6833-3p | 4 |
| <i>circSPHKAP</i> | miR-4769-3p/6817-5p | 1 |
| <i>circSPHKAP</i> | miR-4771            | 2 |
| <i>circSPHKAP</i> | miR-4772-3p         | 2 |
| <i>circSPHKAP</i> | miR-4772-5p         | 1 |
| <i>circSPHKAP</i> | miR-4773            | 2 |
| <i>circSPHKAP</i> | miR-4774-3p         | 1 |
| <i>circSPHKAP</i> | miR-4776-3p         | 2 |
| <i>circSPHKAP</i> | miR-4777-5p         | 2 |
| <i>circSPHKAP</i> | miR-4778-5p         | 3 |
| <i>circSPHKAP</i> | miR-4779            | 3 |
| <i>circSPHKAP</i> | miR-4781-5p         | 1 |
| <i>circSPHKAP</i> | miR-4782-5p/5706    | 3 |
| <i>circSPHKAP</i> | miR-4786-3p         | 3 |
| <i>circSPHKAP</i> | miR-4786-5p         | 2 |
| <i>circSPHKAP</i> | miR-4787-3p         | 1 |
| <i>circSPHKAP</i> | miR-4789-3p         | 1 |
| <i>circSPHKAP</i> | miR-4790-3p         | 2 |
| <i>circSPHKAP</i> | miR-4792            | 1 |
| <i>circSPHKAP</i> | miR-4793-5p         | 2 |
| <i>circSPHKAP</i> | miR-4795-3p         | 1 |
| <i>circSPHKAP</i> | miR-4795-5p         | 5 |
| <i>circSPHKAP</i> | miR-4796-3p         | 5 |

|                   |                             |   |
|-------------------|-----------------------------|---|
| <i>circSPHKAP</i> | miR-4797-3p                 | 4 |
| <i>circSPHKAP</i> | miR-4797-5p                 | 2 |
| <i>circSPHKAP</i> | miR-4799-5p                 | 1 |
| <i>circSPHKAP</i> | miR-4800-3p                 | 1 |
| <i>circSPHKAP</i> | miR-4800-5p                 | 1 |
| <i>circSPHKAP</i> | miR-4802-5p                 | 3 |
| <i>circSPHKAP</i> | miR-4804-3p                 | 2 |
| <i>circSPHKAP</i> | miR-4804-5p                 | 1 |
| <i>circSPHKAP</i> | miR-483-3p.1                | 1 |
| <i>circSPHKAP</i> | miR-483-5p                  | 2 |
| <i>circSPHKAP</i> | miR-484/3155                | 1 |
| <i>circSPHKAP</i> | miR-485-5p                  | 4 |
| <i>circSPHKAP</i> | miR-486-5p                  | 1 |
| <i>circSPHKAP</i> | miR-488-3p                  | 2 |
| <i>circSPHKAP</i> | miR-488-5p                  | 4 |
| <i>circSPHKAP</i> | miR-489-3p                  | 1 |
| <i>circSPHKAP</i> | miR-490-3p                  | 2 |
| <i>circSPHKAP</i> | miR-490-5p                  | 4 |
| <i>circSPHKAP</i> | miR-491-3p                  | 1 |
| <i>circSPHKAP</i> | miR-491-5p                  | 1 |
| <i>circSPHKAP</i> | miR-494-3p                  | 2 |
| <i>circSPHKAP</i> | miR-495-3p                  | 4 |
| <i>circSPHKAP</i> | miR-496.1                   | 1 |
| <i>circSPHKAP</i> | miR-497-3p                  | 1 |
| <i>circSPHKAP</i> | miR-498                     | 3 |
| <i>circSPHKAP</i> | miR-499a-3p/499b-3p         | 2 |
| <i>circSPHKAP</i> | miR-499b-5p                 | 1 |
| <i>circSPHKAP</i> | miR-5000-3p                 | 1 |
| <i>circSPHKAP</i> | miR-5000-5p                 | 2 |
| <i>circSPHKAP</i> | miR-5003-5p                 | 1 |
| <i>circSPHKAP</i> | miR-5006-5p                 | 3 |
| <i>circSPHKAP</i> | miR-5007-3p                 | 1 |
| <i>circSPHKAP</i> | miR-5007-5p                 | 2 |
| <i>circSPHKAP</i> | miR-5008-3p/6737-3p/7157-3p | 3 |
| <i>circSPHKAP</i> | miR-5008-5p                 | 3 |
| <i>circSPHKAP</i> | miR-5009-3p                 | 1 |
| <i>circSPHKAP</i> | miR-5009-5p/8058            | 1 |
| <i>circSPHKAP</i> | miR-500a-5p                 | 1 |

|                   |                             |   |
|-------------------|-----------------------------|---|
| <i>circSPHKAP</i> | miR-500b-3p                 | 4 |
| <i>circSPHKAP</i> | miR-501-5p                  | 1 |
| <i>circSPHKAP</i> | miR-5010-3p                 | 3 |
| <i>circSPHKAP</i> | miR-5011-3p                 | 2 |
| <i>circSPHKAP</i> | miR-5011-5p                 | 1 |
| <i>circSPHKAP</i> | miR-502-5p                  | 2 |
| <i>circSPHKAP</i> | miR-503-5p                  | 5 |
| <i>circSPHKAP</i> | miR-504-3p                  | 3 |
| <i>circSPHKAP</i> | miR-504-5p.1                | 6 |
| <i>circSPHKAP</i> | miR-505-3p.1                | 2 |
| <i>circSPHKAP</i> | miR-505-3p.2                | 3 |
| <i>circSPHKAP</i> | miR-505-5p                  | 2 |
| <i>circSPHKAP</i> | miR-506-5p                  | 2 |
| <i>circSPHKAP</i> | miR-508-5p                  | 3 |
| <i>circSPHKAP</i> | miR-5088-3p                 | 1 |
| <i>circSPHKAP</i> | miR-5088-5p                 | 1 |
| <i>circSPHKAP</i> | miR-5089-3p                 | 2 |
| <i>circSPHKAP</i> | miR-509-3-5p/509-5p/4418    | 2 |
| <i>circSPHKAP</i> | miR-509-3p                  | 2 |
| <i>circSPHKAP</i> | miR-5091                    | 1 |
| <i>circSPHKAP</i> | miR-5092                    | 2 |
| <i>circSPHKAP</i> | miR-5093                    | 1 |
| <i>circSPHKAP</i> | miR-5095/7151-3p            | 1 |
| <i>circSPHKAP</i> | miR-510-3p                  | 2 |
| <i>circSPHKAP</i> | miR-510-5p                  | 1 |
| <i>circSPHKAP</i> | miR-5100                    | 1 |
| <i>circSPHKAP</i> | miR-512-3p                  | 1 |
| <i>circSPHKAP</i> | miR-512-5p                  | 2 |
| <i>circSPHKAP</i> | miR-513a-3p/513c-3p/3606-3p | 1 |
| <i>circSPHKAP</i> | miR-513a-5p                 | 4 |
| <i>circSPHKAP</i> | miR-513b-3p                 | 3 |
| <i>circSPHKAP</i> | miR-513b-5p                 | 1 |
| <i>circSPHKAP</i> | miR-513c-5p/514b-5p         | 1 |
| <i>circSPHKAP</i> | miR-514a-3p                 | 1 |
| <i>circSPHKAP</i> | miR-514a-5p                 | 2 |
| <i>circSPHKAP</i> | miR-515-5p/519e-5p          | 5 |
| <i>circSPHKAP</i> | miR-516a-3p/516b-3p/7162-5p | 2 |
| <i>circSPHKAP</i> | miR-516a-5p                 | 2 |

|                   |                                                                  |   |
|-------------------|------------------------------------------------------------------|---|
| <i>circSPHKAP</i> | miR-516b-5p                                                      | 3 |
| <i>circSPHKAP</i> | miR-517-3p                                                       | 1 |
| <i>circSPHKAP</i> | miR-517-5p                                                       | 1 |
| <i>circSPHKAP</i> | miR-5187-3p                                                      | 1 |
| <i>circSPHKAP</i> | miR-5187-5p                                                      | 1 |
| <i>circSPHKAP</i> | miR-5188                                                         | 1 |
| <i>circSPHKAP</i> | miR-5189-3p                                                      | 2 |
| <i>circSPHKAP</i> | miR-518a-5p/527                                                  | 3 |
| <i>circSPHKAP</i> | miR-518c-5p                                                      | 2 |
| <i>circSPHKAP</i> | miR-518d-5p/519-5p                                               | 2 |
| <i>circSPHKAP</i> | miR-519-3p                                                       | 2 |
| <i>circSPHKAP</i> | miR-5190                                                         | 4 |
| <i>circSPHKAP</i> | miR-5192                                                         | 5 |
| <i>circSPHKAP</i> | miR-5193                                                         | 4 |
| <i>circSPHKAP</i> | miR-5196-3p                                                      | 2 |
| <i>circSPHKAP</i> | miR-5197-3p                                                      | 2 |
| <i>circSPHKAP</i> | miR-519d-5p                                                      | 3 |
| <i>circSPHKAP</i> | miR-520f-5p                                                      | 1 |
| <i>circSPHKAP</i> | miR-520g-3p                                                      | 1 |
| <i>circSPHKAP</i> | miR-520g-5p                                                      | 1 |
| <i>circSPHKAP</i> | miR-522-3p                                                       | 2 |
| <i>circSPHKAP</i> | miR-524-3p/525-3p                                                | 1 |
| <i>circSPHKAP</i> | miR-524-5p                                                       | 4 |
| <i>circSPHKAP</i> | miR-525-5p                                                       | 5 |
| <i>circSPHKAP</i> | miR-539-5p                                                       | 1 |
| <i>circSPHKAP</i> | miR-541-5p                                                       | 1 |
| <i>circSPHKAP</i> | miR-542-3p                                                       | 1 |
| <i>circSPHKAP</i> | miR-544a                                                         | 1 |
| <i>circSPHKAP</i> | miR-544b                                                         | 4 |
| <i>circSPHKAP</i> | miR-545-3p                                                       | 3 |
| <i>circSPHKAP</i> | miR-548ac/548bb-3p/548d-3p/548h-3p/548z                          |   |
| <i>circSPHKAP</i> | miR-548ah-5p/3609                                                | 3 |
| <i>circSPHKAP</i> | miR-548aj-5p/548f-5p/548g-5p/548x-5p                             | 1 |
| <i>circSPHKAP</i> | miR-548al/4445-3p                                                | 1 |
| <i>circSPHKAP</i> | miR-548an                                                        | 1 |
| <i>circSPHKAP</i> | miR-548ap-3p/548aa/548t-3p                                       | 1 |
| <i>circSPHKAP</i> | miR-548aq-3p/548am-3p/548aj-3p/548ah-3p/548ae-3p/548j-3p/548x-3p |   |
| <i>circSPHKAP</i> | miR-548as-3p                                                     | 1 |

|                   |                                                                  |   |
|-------------------|------------------------------------------------------------------|---|
| <i>circSPHKAP</i> | miR-548au-3p                                                     | 1 |
| <i>circSPHKAP</i> | miR-548av-3p                                                     | 2 |
| <i>circSPHKAP</i> | miR-548av-5p/548k/8054                                           | 3 |
| <i>circSPHKAP</i> | miR-548aw                                                        | 3 |
| <i>circSPHKAP</i> | miR-548ay-3p/548at-3p                                            | 1 |
| <i>circSPHKAP</i> | miR-548ay-5p/548au-5p/548as-5p/548ar-3p/548aq-5p/548ap-5p/548am- |   |
| <i>circSPHKAP</i> | miR-548az-3p/548ar-3p/548a-3p/548e-3p/548f-3p                    |   |
| <i>circSPHKAP</i> | miR-548az-5p/548t-5p                                             | 3 |
| <i>circSPHKAP</i> | miR-548b-3p                                                      | 4 |
| <i>circSPHKAP</i> | miR-548c-3p                                                      | 2 |
| <i>circSPHKAP</i> | miR-548e-5p                                                      | 4 |
| <i>circSPHKAP</i> | miR-548g-3p                                                      | 3 |
| <i>circSPHKAP</i> | miR-548l                                                         | 3 |
| <i>circSPHKAP</i> | miR-548m                                                         | 2 |
| <i>circSPHKAP</i> | miR-548n                                                         | 3 |
| <i>circSPHKAP</i> | miR-548p                                                         | 1 |
| <i>circSPHKAP</i> | miR-548q                                                         | 1 |
| <i>circSPHKAP</i> | miR-548s                                                         | 1 |
| <i>circSPHKAP</i> | miR-548u/7161-5p                                                 | 2 |
| <i>circSPHKAP</i> | miR-548v                                                         | 2 |
| <i>circSPHKAP</i> | miR-549a                                                         | 3 |
| <i>circSPHKAP</i> | miR-550a-3-5p/550a-5p/1271-3p                                    | 2 |
| <i>circSPHKAP</i> | miR-550b-2-5p                                                    | 3 |
| <i>circSPHKAP</i> | miR-551b-5p                                                      | 3 |
| <i>circSPHKAP</i> | miR-552-3p                                                       | 2 |
| <i>circSPHKAP</i> | miR-552-5p                                                       | 1 |
| <i>circSPHKAP</i> | miR-554                                                          | 1 |
| <i>circSPHKAP</i> | miR-556-5p                                                       | 2 |
| <i>circSPHKAP</i> | miR-5571-3p                                                      | 2 |
| <i>circSPHKAP</i> | miR-5571-5p                                                      | 1 |
| <i>circSPHKAP</i> | miR-5579-3p                                                      | 1 |
| <i>circSPHKAP</i> | miR-558                                                          | 1 |
| <i>circSPHKAP</i> | miR-5580-5p                                                      | 1 |
| <i>circSPHKAP</i> | miR-5581-3p                                                      | 5 |
| <i>circSPHKAP</i> | miR-5582-3p                                                      | 1 |
| <i>circSPHKAP</i> | miR-5582-5p                                                      | 1 |
| <i>circSPHKAP</i> | miR-5583-3p                                                      | 1 |
| <i>circSPHKAP</i> | miR-5584-3p                                                      | 3 |

|                   |                 |   |
|-------------------|-----------------|---|
| <i>circSPHKAP</i> | miR-5584-5p     | 1 |
| <i>circSPHKAP</i> | miR-5586-3p     | 2 |
| <i>circSPHKAP</i> | miR-5586-5p     | 1 |
| <i>circSPHKAP</i> | miR-5587-3p     | 2 |
| <i>circSPHKAP</i> | miR-5589-3p     | 1 |
| <i>circSPHKAP</i> | miR-5589-5p     | 1 |
| <i>circSPHKAP</i> | miR-561-5p      | 2 |
| <i>circSPHKAP</i> | miR-568         | 1 |
| <i>circSPHKAP</i> | miR-5681a       | 1 |
| <i>circSPHKAP</i> | miR-5683        | 1 |
| <i>circSPHKAP</i> | miR-569         | 1 |
| <i>circSPHKAP</i> | miR-5690        | 1 |
| <i>circSPHKAP</i> | miR-5691        | 2 |
| <i>circSPHKAP</i> | miR-5693        | 6 |
| <i>circSPHKAP</i> | miR-5694        | 3 |
| <i>circSPHKAP</i> | miR-5695        | 3 |
| <i>circSPHKAP</i> | miR-5697        | 1 |
| <i>circSPHKAP</i> | miR-5699-5p     | 1 |
| <i>circSPHKAP</i> | miR-570-3p      | 2 |
| <i>circSPHKAP</i> | miR-5700        | 1 |
| <i>circSPHKAP</i> | miR-5701        | 1 |
| <i>circSPHKAP</i> | miR-5702        | 1 |
| <i>circSPHKAP</i> | miR-5708        | 1 |
| <i>circSPHKAP</i> | miR-573/3616-5p | 2 |
| <i>circSPHKAP</i> | miR-5739        | 1 |
| <i>circSPHKAP</i> | miR-574-3p      | 1 |
| <i>circSPHKAP</i> | miR-575/4676-5p | 5 |
| <i>circSPHKAP</i> | miR-576-3p      | 4 |
| <i>circSPHKAP</i> | miR-576-5p      | 2 |
| <i>circSPHKAP</i> | miR-580-3p      | 1 |
| <i>circSPHKAP</i> | miR-581         | 2 |
| <i>circSPHKAP</i> | miR-582-3p      | 1 |
| <i>circSPHKAP</i> | miR-582-5p      | 1 |
| <i>circSPHKAP</i> | miR-583         | 5 |
| <i>circSPHKAP</i> | miR-584-5p      | 1 |
| <i>circSPHKAP</i> | miR-586         | 1 |
| <i>circSPHKAP</i> | miR-587         | 3 |
| <i>circSPHKAP</i> | miR-588         | 1 |

|                   |                                      |   |
|-------------------|--------------------------------------|---|
| <i>circSPHKAP</i> | miR-589-3p                           | 3 |
| <i>circSPHKAP</i> | miR-589-5p                           | 1 |
| <i>circSPHKAP</i> | miR-591                              | 2 |
| <i>circSPHKAP</i> | miR-592                              | 1 |
| <i>circSPHKAP</i> | miR-593-3p                           | 3 |
| <i>circSPHKAP</i> | miR-595                              | 1 |
| <i>circSPHKAP</i> | miR-596                              | 3 |
| <i>circSPHKAP</i> | miR-597-5p                           | 1 |
| <i>circSPHKAP</i> | miR-599                              | 1 |
| <i>circSPHKAP</i> | miR-602                              | 1 |
| <i>circSPHKAP</i> | miR-604                              | 1 |
| <i>circSPHKAP</i> | miR-605-3p                           | 1 |
| <i>circSPHKAP</i> | miR-6068                             | 3 |
| <i>circSPHKAP</i> | miR-6069                             | 1 |
| <i>circSPHKAP</i> | miR-607                              | 3 |
| <i>circSPHKAP</i> | miR-6071                             | 3 |
| <i>circSPHKAP</i> | miR-6072/6891-3p                     | 2 |
| <i>circSPHKAP</i> | miR-6074                             | 1 |
| <i>circSPHKAP</i> | miR-6076/6797-3p                     | 1 |
| <i>circSPHKAP</i> | miR-6077                             | 5 |
| <i>circSPHKAP</i> | miR-6078                             | 1 |
| <i>circSPHKAP</i> | miR-6079                             | 2 |
| <i>circSPHKAP</i> | miR-6081                             | 3 |
| <i>circSPHKAP</i> | miR-6089                             | 3 |
| <i>circSPHKAP</i> | miR-6090                             | 3 |
| <i>circSPHKAP</i> | miR-611/3131                         | 1 |
| <i>circSPHKAP</i> | miR-612/1285-3p/3187-5p/5189-5p/6860 | 1 |
| <i>circSPHKAP</i> | miR-6124                             | 7 |
| <i>circSPHKAP</i> | miR-6125                             | 1 |
| <i>circSPHKAP</i> | miR-6126                             | 2 |
| <i>circSPHKAP</i> | miR-6132/6836-5p                     | 2 |
| <i>circSPHKAP</i> | miR-6134                             | 3 |
| <i>circSPHKAP</i> | miR-614                              | 1 |
| <i>circSPHKAP</i> | miR-6165                             | 3 |
| <i>circSPHKAP</i> | miR-618                              | 2 |
| <i>circSPHKAP</i> | miR-621                              | 1 |
| <i>circSPHKAP</i> | miR-624-3p                           | 3 |
| <i>circSPHKAP</i> | miR-626/6876-3p                      | 4 |



|                   |                  |   |
|-------------------|------------------|---|
| <i>circSPHKAP</i> | miR-627-5p       | 2 |
| <i>circSPHKAP</i> | miR-628-5p       | 1 |
| <i>circSPHKAP</i> | miR-629-3p       | 1 |
| <i>circSPHKAP</i> | miR-630          | 1 |
| <i>circSPHKAP</i> | miR-631/3661     | 1 |
| <i>circSPHKAP</i> | miR-632/4288     | 1 |
| <i>circSPHKAP</i> | miR-637          | 1 |
| <i>circSPHKAP</i> | miR-640          | 1 |
| <i>circSPHKAP</i> | miR-641/3617-5p  | 3 |
| <i>circSPHKAP</i> | miR-642-3p       | 2 |
| <i>circSPHKAP</i> | miR-642a-5p      | 4 |
| <i>circSPHKAP</i> | miR-642b-5p      | 1 |
| <i>circSPHKAP</i> | miR-643          | 1 |
| <i>circSPHKAP</i> | miR-644a         | 1 |
| <i>circSPHKAP</i> | miR-646          | 5 |
| <i>circSPHKAP</i> | miR-647          | 1 |
| <i>circSPHKAP</i> | miR-648          | 3 |
| <i>circSPHKAP</i> | miR-649          | 2 |
| <i>circSPHKAP</i> | miR-6499-3p      | 3 |
| <i>circSPHKAP</i> | miR-6501-3p      | 2 |
| <i>circSPHKAP</i> | miR-6502-3p      | 2 |
| <i>circSPHKAP</i> | miR-6504-3p      | 1 |
| <i>circSPHKAP</i> | miR-6505-5p      | 3 |
| <i>circSPHKAP</i> | miR-6507-3p      | 1 |
| <i>circSPHKAP</i> | miR-6507-5p      | 1 |
| <i>circSPHKAP</i> | miR-6508-3p      | 2 |
| <i>circSPHKAP</i> | miR-6508-5p/8067 | 1 |
| <i>circSPHKAP</i> | miR-6509-3p      | 1 |
| <i>circSPHKAP</i> | miR-651-3p       | 5 |
| <i>circSPHKAP</i> | miR-6510-5p      | 3 |
| <i>circSPHKAP</i> | miR-6511-5p      | 1 |
| <i>circSPHKAP</i> | miR-6512-5p      | 1 |
| <i>circSPHKAP</i> | miR-6513-3p      | 2 |
| <i>circSPHKAP</i> | miR-6514-5p      | 3 |
| <i>circSPHKAP</i> | miR-6515-3p      | 2 |
| <i>circSPHKAP</i> | miR-6516-5p      | 2 |
| <i>circSPHKAP</i> | miR-652-5p       | 2 |
| <i>circSPHKAP</i> | miR-653-3p       | 1 |

|                   |                     |   |
|-------------------|---------------------|---|
| <i>circSPHKAP</i> | miR-653-5p          | 3 |
| <i>circSPHKAP</i> | miR-654-3p          | 1 |
| <i>circSPHKAP</i> | miR-654-5p          | 1 |
| <i>circSPHKAP</i> | miR-660-3p          | 4 |
| <i>circSPHKAP</i> | miR-661             | 1 |
| <i>circSPHKAP</i> | miR-662             | 1 |
| <i>circSPHKAP</i> | miR-663b            | 1 |
| <i>circSPHKAP</i> | miR-664a-3p         | 2 |
| <i>circSPHKAP</i> | miR-664b-5p         | 2 |
| <i>circSPHKAP</i> | miR-670-3p          | 1 |
| <i>circSPHKAP</i> | miR-671-5p          | 3 |
| <i>circSPHKAP</i> | miR-6715a-3p        | 1 |
| <i>circSPHKAP</i> | miR-6715b-3p        | 1 |
| <i>circSPHKAP</i> | miR-6716-5p         | 1 |
| <i>circSPHKAP</i> | miR-6717-5p         | 1 |
| <i>circSPHKAP</i> | miR-6719-3p         | 2 |
| <i>circSPHKAP</i> | miR-6720-5p         | 4 |
| <i>circSPHKAP</i> | miR-6722-5p         | 1 |
| <i>circSPHKAP</i> | miR-6724-5p/6773-5p | 1 |
| <i>circSPHKAP</i> | miR-6728-3p         | 4 |
| <i>circSPHKAP</i> | miR-6729-3p         | 1 |
| <i>circSPHKAP</i> | miR-6730-3p         | 2 |
| <i>circSPHKAP</i> | miR-6730-5p         | 1 |
| <i>circSPHKAP</i> | miR-6731-3p         | 1 |
| <i>circSPHKAP</i> | miR-6731-5p/8085    | 3 |
| <i>circSPHKAP</i> | miR-6732-3p         | 2 |
| <i>circSPHKAP</i> | miR-6733-3p         | 4 |
| <i>circSPHKAP</i> | miR-6734-3p         | 2 |
| <i>circSPHKAP</i> | miR-6734-5p         | 1 |
| <i>circSPHKAP</i> | miR-6735-3p         | 2 |
| <i>circSPHKAP</i> | miR-6736-3p         | 2 |
| <i>circSPHKAP</i> | miR-6738-3p         | 1 |
| <i>circSPHKAP</i> | miR-6739-3p         | 2 |
| <i>circSPHKAP</i> | miR-6741-3p         | 1 |
| <i>circSPHKAP</i> | miR-6741-5p         | 1 |
| <i>circSPHKAP</i> | miR-6742-3p         | 1 |
| <i>circSPHKAP</i> | miR-6742-5p         | 1 |
| <i>circSPHKAP</i> | miR-6744-5p         | 3 |

|                   |                       |   |
|-------------------|-----------------------|---|
| <i>circSPHKAP</i> | miR-6747-3p           | 1 |
| <i>circSPHKAP</i> | miR-6748-3p           | 2 |
| <i>circSPHKAP</i> | miR-6749-3p           | 4 |
| <i>circSPHKAP</i> | miR-6750-3p           | 2 |
| <i>circSPHKAP</i> | miR-6750-5p/6822-5p   | 1 |
| <i>circSPHKAP</i> | miR-6752-3p           | 1 |
| <i>circSPHKAP</i> | miR-6753-3p/7107-3p   | 1 |
| <i>circSPHKAP</i> | miR-6756-5p/6766-5p   | 1 |
| <i>circSPHKAP</i> | miR-6757-3p           | 1 |
| <i>circSPHKAP</i> | miR-6757-5p           | 1 |
| <i>circSPHKAP</i> | miR-6758-5p/6856-5p   | 3 |
| <i>circSPHKAP</i> | miR-6759-5p           | 1 |
| <i>circSPHKAP</i> | miR-676-3p            | 3 |
| <i>circSPHKAP</i> | miR-676-5p            | 2 |
| <i>circSPHKAP</i> | miR-6760-3p           | 2 |
| <i>circSPHKAP</i> | miR-6760-5p           | 5 |
| <i>circSPHKAP</i> | miR-6761-5p           | 1 |
| <i>circSPHKAP</i> | miR-6762-3p           | 1 |
| <i>circSPHKAP</i> | miR-6763-3p           | 2 |
| <i>circSPHKAP</i> | miR-6764-3p/6824-3p   | 2 |
| <i>circSPHKAP</i> | miR-6765-5p           | 5 |
| <i>circSPHKAP</i> | miR-6768-3p           | 1 |
| <i>circSPHKAP</i> | miR-6768-5p           | 2 |
| <i>circSPHKAP</i> | miR-6769a-3p          | 1 |
| <i>circSPHKAP</i> | miR-6769a-5p/6769b-5p | 1 |
| <i>circSPHKAP</i> | miR-6770-5p           | 6 |
| <i>circSPHKAP</i> | miR-6771-3p           | 1 |
| <i>circSPHKAP</i> | miR-6772-3p           | 1 |
| <i>circSPHKAP</i> | miR-6773-3p           | 1 |
| <i>circSPHKAP</i> | miR-6776-3p           | 2 |
| <i>circSPHKAP</i> | miR-6776-5p           | 1 |
| <i>circSPHKAP</i> | miR-6778-3p           | 5 |
| <i>circSPHKAP</i> | miR-6779-3p           | 2 |
| <i>circSPHKAP</i> | miR-6780a-3p          | 1 |
| <i>circSPHKAP</i> | miR-6783-5p           | 2 |
| <i>circSPHKAP</i> | miR-6787-3p           | 3 |
| <i>circSPHKAP</i> | miR-6789-5p           | 1 |
| <i>circSPHKAP</i> | miR-6791-3p/6829-3p   | 5 |

|                   |                     |   |
|-------------------|---------------------|---|
| <i>circSPHKAP</i> | miR-6792-5p         | 1 |
| <i>circSPHKAP</i> | miR-6793-3p         | 4 |
| <i>circSPHKAP</i> | miR-6796-5p         | 1 |
| <i>circSPHKAP</i> | miR-6798-3p         | 1 |
| <i>circSPHKAP</i> | miR-6798-5p         | 1 |
| <i>circSPHKAP</i> | miR-6801-5p         | 3 |
| <i>circSPHKAP</i> | miR-6803-3p         | 1 |
| <i>circSPHKAP</i> | miR-6807-5p         | 2 |
| <i>circSPHKAP</i> | miR-6809-3p         | 4 |
| <i>circSPHKAP</i> | miR-6809-5p         | 3 |
| <i>circSPHKAP</i> | miR-6810-5p         | 2 |
| <i>circSPHKAP</i> | miR-6811-3p         | 2 |
| <i>circSPHKAP</i> | miR-6812-3p         | 1 |
| <i>circSPHKAP</i> | miR-6813-3p         | 1 |
| <i>circSPHKAP</i> | miR-6814-3p/6872-5p | 2 |
| <i>circSPHKAP</i> | miR-6814-5p         | 2 |
| <i>circSPHKAP</i> | miR-6815-3p         | 1 |
| <i>circSPHKAP</i> | miR-6815-5p/6865-5p | 5 |
| <i>circSPHKAP</i> | miR-6816-3p         | 2 |
| <i>circSPHKAP</i> | miR-6817-3p         | 1 |
| <i>circSPHKAP</i> | miR-6818-3p         | 3 |
| <i>circSPHKAP</i> | miR-6818-5p         | 1 |
| <i>circSPHKAP</i> | miR-6819-3p/6877-3p | 4 |
| <i>circSPHKAP</i> | miR-6822-3p         | 2 |
| <i>circSPHKAP</i> | miR-6823-5p         | 1 |
| <i>circSPHKAP</i> | miR-6824-5p         | 1 |
| <i>circSPHKAP</i> | miR-6825-3p         | 1 |
| <i>circSPHKAP</i> | miR-6825-5p         | 1 |
| <i>circSPHKAP</i> | miR-6828-3p         | 3 |
| <i>circSPHKAP</i> | miR-6828-5p         | 3 |
| <i>circSPHKAP</i> | miR-6830-5p         | 6 |
| <i>circSPHKAP</i> | miR-6832-3p         | 1 |
| <i>circSPHKAP</i> | miR-6833-5p         | 3 |
| <i>circSPHKAP</i> | miR-6834-3p         | 2 |
| <i>circSPHKAP</i> | miR-6834-5p         | 1 |
| <i>circSPHKAP</i> | miR-6836-3p         | 1 |
| <i>circSPHKAP</i> | miR-6837-3p         | 1 |
| <i>circSPHKAP</i> | miR-6840-3p         | 5 |

|                   |                     |   |
|-------------------|---------------------|---|
| <i>circSPHKAP</i> | miR-6841-3p         | 1 |
| <i>circSPHKAP</i> | miR-6842-3p         | 1 |
| <i>circSPHKAP</i> | miR-6843-3p/6848-3p | 2 |
| <i>circSPHKAP</i> | miR-6844            | 1 |
| <i>circSPHKAP</i> | miR-6845-3p         | 3 |
| <i>circSPHKAP</i> | miR-6846-3p         | 1 |
| <i>circSPHKAP</i> | miR-6847-5p         | 1 |
| <i>circSPHKAP</i> | miR-6849-3p         | 2 |
| <i>circSPHKAP</i> | miR-6850-3p         | 1 |
| <i>circSPHKAP</i> | miR-6850-5p         | 1 |
| <i>circSPHKAP</i> | miR-6852-5p         | 1 |
| <i>circSPHKAP</i> | miR-6853-3p         | 1 |
| <i>circSPHKAP</i> | miR-6856-3p         | 7 |
| <i>circSPHKAP</i> | miR-6857-3p         | 1 |
| <i>circSPHKAP</i> | miR-6857-5p         | 2 |
| <i>circSPHKAP</i> | miR-6858-3p         | 5 |
| <i>circSPHKAP</i> | miR-6859-3p         | 1 |
| <i>circSPHKAP</i> | miR-6861-5p         | 1 |
| <i>circSPHKAP</i> | miR-6864-5p         | 2 |
| <i>circSPHKAP</i> | miR-6865-3p         | 1 |
| <i>circSPHKAP</i> | miR-6866-5p         | 1 |
| <i>circSPHKAP</i> | miR-6867-3p         | 2 |
| <i>circSPHKAP</i> | miR-6868-3p         | 1 |
| <i>circSPHKAP</i> | miR-6868-5p         | 3 |
| <i>circSPHKAP</i> | miR-6869-5p         | 1 |
| <i>circSPHKAP</i> | miR-6870-3p         | 2 |
| <i>circSPHKAP</i> | miR-6871-3p         | 2 |
| <i>circSPHKAP</i> | miR-6871-5p         | 1 |
| <i>circSPHKAP</i> | miR-6872-3p         | 4 |
| <i>circSPHKAP</i> | miR-6873-3p         | 1 |
| <i>circSPHKAP</i> | miR-6873-5p         | 1 |
| <i>circSPHKAP</i> | miR-6874-5p         | 3 |
| <i>circSPHKAP</i> | miR-6875-3p         | 1 |
| <i>circSPHKAP</i> | miR-6878-3p         | 1 |
| <i>circSPHKAP</i> | miR-6878-5p         | 3 |
| <i>circSPHKAP</i> | miR-6879-3p         | 1 |
| <i>circSPHKAP</i> | miR-6880-5p         | 5 |
| <i>circSPHKAP</i> | miR-6881-3p         | 1 |

|                   |             |   |
|-------------------|-------------|---|
| <i>circSPHKAP</i> | miR-6882-3p | 2 |
| <i>circSPHKAP</i> | miR-6884-3p | 4 |
| <i>circSPHKAP</i> | miR-6885-3p | 2 |
| <i>circSPHKAP</i> | miR-6886-3p | 1 |
| <i>circSPHKAP</i> | miR-6888-3p | 2 |
| <i>circSPHKAP</i> | miR-6888-5p | 5 |
| <i>circSPHKAP</i> | miR-6889-3p | 3 |
| <i>circSPHKAP</i> | miR-6890-3p | 1 |
| <i>circSPHKAP</i> | miR-6892-3p | 1 |
| <i>circSPHKAP</i> | miR-6895-3p | 3 |
| <i>circSPHKAP</i> | miR-6895-5p | 2 |
| <i>circSPHKAP</i> | miR-7-3p    | 3 |
| <i>circSPHKAP</i> | miR-7-5p    | 5 |
| <i>circSPHKAP</i> | miR-7106-3p | 1 |
| <i>circSPHKAP</i> | miR-7108-3p | 1 |
| <i>circSPHKAP</i> | miR-7108-5p | 3 |
| <i>circSPHKAP</i> | miR-7109-3p | 2 |
| <i>circSPHKAP</i> | miR-711     | 1 |
| <i>circSPHKAP</i> | miR-7110-3p | 1 |
| <i>circSPHKAP</i> | miR-7111-3p | 1 |
| <i>circSPHKAP</i> | miR-7112-3p | 3 |
| <i>circSPHKAP</i> | miR-7113-3p | 2 |
| <i>circSPHKAP</i> | miR-7113-5p | 3 |
| <i>circSPHKAP</i> | miR-7114-5p | 3 |
| <i>circSPHKAP</i> | miR-7150    | 4 |
| <i>circSPHKAP</i> | miR-7152-5p | 2 |
| <i>circSPHKAP</i> | miR-7153-3p | 1 |
| <i>circSPHKAP</i> | miR-7154-5p | 2 |
| <i>circSPHKAP</i> | miR-7155-5p | 1 |
| <i>circSPHKAP</i> | miR-7156-3p | 4 |
| <i>circSPHKAP</i> | miR-7158-3p | 2 |
| <i>circSPHKAP</i> | miR-7158-5p | 2 |
| <i>circSPHKAP</i> | miR-7159-5p | 3 |
| <i>circSPHKAP</i> | miR-7160-3p | 2 |
| <i>circSPHKAP</i> | miR-7160-5p | 4 |
| <i>circSPHKAP</i> | miR-7162-3p | 6 |
| <i>circSPHKAP</i> | miR-7515    | 2 |
| <i>circSPHKAP</i> | miR-759     | 4 |

|                   |             |   |
|-------------------|-------------|---|
| <i>circSPHKAP</i> | miR-760     | 2 |
| <i>circSPHKAP</i> | miR-764     | 2 |
| <i>circSPHKAP</i> | miR-766-3p  | 7 |
| <i>circSPHKAP</i> | miR-767-3p  | 2 |
| <i>circSPHKAP</i> | miR-769-5p  | 2 |
| <i>circSPHKAP</i> | miR-7703    | 1 |
| <i>circSPHKAP</i> | miR-7843-3p | 1 |
| <i>circSPHKAP</i> | miR-7845-5p | 1 |
| <i>circSPHKAP</i> | miR-7847-3p | 3 |
| <i>circSPHKAP</i> | miR-7848-3p | 2 |
| <i>circSPHKAP</i> | miR-7849-3p | 1 |
| <i>circSPHKAP</i> | miR-7850-5p | 2 |
| <i>circSPHKAP</i> | miR-7854-3p | 3 |
| <i>circSPHKAP</i> | miR-7855-5p | 3 |
| <i>circSPHKAP</i> | miR-7973    | 1 |
| <i>circSPHKAP</i> | miR-7974    | 1 |
| <i>circSPHKAP</i> | miR-7975    | 2 |
| <i>circSPHKAP</i> | miR-7977    | 4 |
| <i>circSPHKAP</i> | miR-7978    | 1 |
| <i>circSPHKAP</i> | miR-8053    | 1 |
| <i>circSPHKAP</i> | miR-8055    | 2 |
| <i>circSPHKAP</i> | miR-8056    | 3 |
| <i>circSPHKAP</i> | miR-8057    | 2 |
| <i>circSPHKAP</i> | miR-8060    | 5 |
| <i>circSPHKAP</i> | miR-8062    | 1 |
| <i>circSPHKAP</i> | miR-8063    | 3 |
| <i>circSPHKAP</i> | miR-8065    | 1 |
| <i>circSPHKAP</i> | miR-8066    | 1 |
| <i>circSPHKAP</i> | miR-8070    | 2 |
| <i>circSPHKAP</i> | miR-8071    | 5 |
| <i>circSPHKAP</i> | miR-8075    | 1 |
| <i>circSPHKAP</i> | miR-8077    | 4 |
| <i>circSPHKAP</i> | miR-8078    | 1 |
| <i>circSPHKAP</i> | miR-8080    | 2 |
| <i>circSPHKAP</i> | miR-8081    | 1 |
| <i>circSPHKAP</i> | miR-8083    | 1 |
| <i>circSPHKAP</i> | miR-8086    | 1 |
| <i>circSPHKAP</i> | miR-8087    | 3 |

|                   |                              |   |
|-------------------|------------------------------|---|
| <i>circSPHKAP</i> | miR-8088                     | 1 |
| <i>circSPHKAP</i> | miR-873-3p                   | 1 |
| <i>circSPHKAP</i> | miR-873-5p.1                 | 2 |
| <i>circSPHKAP</i> | miR-873-5p.2                 | 3 |
| <i>circSPHKAP</i> | miR-875-3p                   | 1 |
| <i>circSPHKAP</i> | miR-876-5p                   | 1 |
| <i>circSPHKAP</i> | miR-877-3p                   | 1 |
| <i>circSPHKAP</i> | miR-877-5p                   | 1 |
| <i>circSPHKAP</i> | miR-885-3p                   | 1 |
| <i>circSPHKAP</i> | miR-888-3p                   | 1 |
| <i>circSPHKAP</i> | miR-888-5p                   | 3 |
| <i>circSPHKAP</i> | miR-889-5p                   | 1 |
| <i>circSPHKAP</i> | miR-891a-3p                  | 4 |
| <i>circSPHKAP</i> | miR-891b                     | 1 |
| <i>circSPHKAP</i> | miR-892-5p                   | 2 |
| <i>circSPHKAP</i> | miR-892a                     | 2 |
| <i>circSPHKAP</i> | miR-892b                     | 2 |
| <i>circSPHKAP</i> | miR-9-5p                     | 1 |
| <i>circSPHKAP</i> | miR-920/4300/5591-5p/6726-5p | 3 |
| <i>circSPHKAP</i> | miR-922                      | 7 |
| <i>circSPHKAP</i> | miR-924                      | 3 |
| <i>circSPHKAP</i> | miR-92a-2-5p                 | 1 |
| <i>circSPHKAP</i> | miR-93-3p                    | 4 |
| <i>circSPHKAP</i> | miR-935                      | 1 |
| <i>circSPHKAP</i> | miR-936                      | 1 |
| <i>circSPHKAP</i> | miR-937-5p                   | 2 |
| <i>circSPHKAP</i> | miR-938                      | 1 |
| <i>circSPHKAP</i> | miR-939-3p                   | 1 |
| <i>circSPHKAP</i> | miR-939-5p/1343-5p           | 1 |
| <i>circSPHKAP</i> | miR-942-3p                   | 1 |
| <i>circSPHKAP</i> | miR-942-5p                   | 4 |
| <i>circSPHKAP</i> | miR-944                      | 1 |
| <i>circSPHKAP</i> | miR-95-3p                    | 1 |
| <i>circSPHKAP</i> | miR-95-5p                    | 1 |
| <i>circSPHKAP</i> | miR-9500                     | 1 |
| <i>circSPHKAP</i> | miR-96-3p                    | 2 |
| <i>circSPHKAP</i> | miR-96-5p/1271-5p            | 1 |
| <i>circSPPL3</i>  | let-7a-2-3p/let-7g-3p        | 2 |



|                  |                                     |   |
|------------------|-------------------------------------|---|
| <i>circSPPL3</i> | let-7c-3p                           | 2 |
| <i>circSPPL3</i> | miR-1-5p                            | 1 |
| <i>circSPPL3</i> | miR-10-5p                           | 1 |
| <i>circSPPL3</i> | miR-103a-2-5p                       | 1 |
| <i>circSPPL3</i> | miR-1178-3p                         | 1 |
| <i>circSPPL3</i> | miR-1202/3972                       | 1 |
| <i>circSPPL3</i> | miR-1226-3p                         | 1 |
| <i>circSPPL3</i> | miR-1227-3p                         | 1 |
| <i>circSPPL3</i> | miR-1229-3p                         | 1 |
| <i>circSPPL3</i> | miR-1231                            | 2 |
| <i>circSPPL3</i> | miR-1237-3p                         | 1 |
| <i>circSPPL3</i> | miR-1244                            | 2 |
| <i>circSPPL3</i> | miR-1246                            | 1 |
| <i>circSPPL3</i> | miR-1248                            | 1 |
| <i>circSPPL3</i> | miR-1267                            | 1 |
| <i>circSPPL3</i> | miR-1270                            | 1 |
| <i>circSPPL3</i> | miR-1286                            | 1 |
| <i>circSPPL3</i> | miR-1287-5p                         | 1 |
| <i>circSPPL3</i> | miR-1290                            | 1 |
| <i>circSPPL3</i> | miR-1295b-5p/1912                   | 2 |
| <i>circSPPL3</i> | miR-1298-3p                         | 1 |
| <i>circSPPL3</i> | miR-1298-5p                         | 2 |
| <i>circSPPL3</i> | miR-130-3p/301-3p/454-3p            | 1 |
| <i>circSPPL3</i> | miR-1304-3p                         | 1 |
| <i>circSPPL3</i> | miR-1306-3p                         | 2 |
| <i>circSPPL3</i> | miR-130b-5p                         | 2 |
| <i>circSPPL3</i> | miR-152-5p                          | 1 |
| <i>circSPPL3</i> | miR-15a-3p                          | 1 |
| <i>circSPPL3</i> | miR-16-1-3p                         | 2 |
| <i>circSPPL3</i> | miR-16-2-3p/195-3p                  | 2 |
| <i>circSPPL3</i> | miR-17-5p/20-5p/93-5p/106-5p/519-3p | 1 |
| <i>circSPPL3</i> | miR-181-3p/4420                     | 3 |
| <i>circSPPL3</i> | miR-186-5p                          | 1 |
| <i>circSPPL3</i> | miR-18a-3p                          | 1 |
| <i>circSPPL3</i> | miR-190a-3p                         | 1 |
| <i>circSPPL3</i> | miR-1911-3p                         | 2 |
| <i>circSPPL3</i> | miR-1915-3p/6764-5p                 | 2 |
| <i>circSPPL3</i> | miR-193-3p                          | 1 |

|                  |                                 |   |
|------------------|---------------------------------|---|
| <i>circSPPL3</i> | miR-200c-5p/550a-3p             | 1 |
| <i>circSPPL3</i> | miR-208-5p                      | 1 |
| <i>circSPPL3</i> | miR-2116-5p                     | 3 |
| <i>circSPPL3</i> | miR-2117                        | 1 |
| <i>circSPPL3</i> | miR-214-3p/3619-5p              | 2 |
| <i>circSPPL3</i> | miR-215-3p                      | 4 |
| <i>circSPPL3</i> | miR-219a-1-3p                   | 2 |
| <i>circSPPL3</i> | miR-22-5p                       | 3 |
| <i>circSPPL3</i> | miR-2278                        | 1 |
| <i>circSPPL3</i> | miR-2355-5p                     | 1 |
| <i>circSPPL3</i> | miR-26-5p                       | 2 |
| <i>circSPPL3</i> | miR-2681-5p                     | 2 |
| <i>circSPPL3</i> | miR-26b-3p                      | 2 |
| <i>circSPPL3</i> | miR-29a-5p                      | 2 |
| <i>circSPPL3</i> | miR-302-3p/372-3p/373-3p/520-3p | 1 |
| <i>circSPPL3</i> | miR-302c-5p                     | 2 |
| <i>circSPPL3</i> | miR-3120-3p                     | 2 |
| <i>circSPPL3</i> | miR-3120-5p                     | 5 |
| <i>circSPPL3</i> | miR-3121-5p                     | 2 |
| <i>circSPPL3</i> | miR-3126-3p                     | 1 |
| <i>circSPPL3</i> | miR-3130-5p/4482-5p             | 2 |
| <i>circSPPL3</i> | miR-3133                        | 1 |
| <i>circSPPL3</i> | miR-3135b                       | 1 |
| <i>circSPPL3</i> | miR-3138                        | 2 |
| <i>circSPPL3</i> | miR-3140-3p                     | 2 |
| <i>circSPPL3</i> | miR-3143                        | 1 |
| <i>circSPPL3</i> | miR-3144-3p                     | 1 |
| <i>circSPPL3</i> | miR-3148                        | 1 |
| <i>circSPPL3</i> | miR-3150a-5p/3150b-5p           | 1 |
| <i>circSPPL3</i> | miR-3176/3922-3p                | 1 |
| <i>circSPPL3</i> | miR-3187-3p                     | 1 |
| <i>circSPPL3</i> | miR-3190-5p                     | 1 |
| <i>circSPPL3</i> | miR-3191-5p                     | 3 |
| <i>circSPPL3</i> | miR-3194-3p                     | 2 |
| <i>circSPPL3</i> | miR-3200-5p                     | 1 |
| <i>circSPPL3</i> | miR-324-3p/1913                 | 1 |
| <i>circSPPL3</i> | miR-324-5p                      | 2 |
| <i>circSPPL3</i> | miR-335-3p                      | 1 |

|                  |                     |   |
|------------------|---------------------|---|
| <i>circSPPL3</i> | miR-338-5p          | 2 |
| <i>circSPPL3</i> | miR-33a-3p          | 2 |
| <i>circSPPL3</i> | miR-340-3p/6827-3p  | 1 |
| <i>circSPPL3</i> | miR-340-5p          | 1 |
| <i>circSPPL3</i> | miR-3605-3p         | 1 |
| <i>circSPPL3</i> | miR-3613-3p         | 1 |
| <i>circSPPL3</i> | miR-3620-3p         | 1 |
| <i>circSPPL3</i> | miR-3652/4430       | 1 |
| <i>circSPPL3</i> | miR-3658            | 1 |
| <i>circSPPL3</i> | miR-3665            | 2 |
| <i>circSPPL3</i> | miR-3667-3p         | 3 |
| <i>circSPPL3</i> | miR-3667-5p         | 1 |
| <i>circSPPL3</i> | miR-367-5p          | 1 |
| <i>circSPPL3</i> | miR-3672/6864-3p    | 1 |
| <i>circSPPL3</i> | miR-3679-3p         | 1 |
| <i>circSPPL3</i> | miR-3692-5p         | 4 |
| <i>circSPPL3</i> | miR-370-3p          | 1 |
| <i>circSPPL3</i> | miR-374a-3p         | 1 |
| <i>circSPPL3</i> | miR-382-3p          | 1 |
| <i>circSPPL3</i> | miR-3909            | 2 |
| <i>circSPPL3</i> | miR-3924            | 2 |
| <i>circSPPL3</i> | miR-3929/4419b/4478 | 1 |
| <i>circSPPL3</i> | miR-3940-5p/4507    | 1 |
| <i>circSPPL3</i> | miR-3944-5p         | 1 |
| <i>circSPPL3</i> | miR-3973            | 1 |
| <i>circSPPL3</i> | miR-425-5p          | 1 |
| <i>circSPPL3</i> | miR-4264            | 2 |
| <i>circSPPL3</i> | miR-4273/7156-5p    | 2 |
| <i>circSPPL3</i> | miR-4274            | 1 |
| <i>circSPPL3</i> | miR-4277            | 2 |
| <i>circSPPL3</i> | miR-4279            | 1 |
| <i>circSPPL3</i> | miR-4282            | 2 |
| <i>circSPPL3</i> | miR-4289            | 1 |
| <i>circSPPL3</i> | miR-4297/5581-5p    | 1 |
| <i>circSPPL3</i> | miR-4314            | 2 |
| <i>circSPPL3</i> | miR-4326            | 2 |
| <i>circSPPL3</i> | miR-433-3p          | 1 |
| <i>circSPPL3</i> | miR-4330            | 1 |

|                  |                       |   |
|------------------|-----------------------|---|
| <i>circSPPL3</i> | miR-4435              | 1 |
| <i>circSPPL3</i> | miR-4468              | 1 |
| <i>circSPPL3</i> | miR-4474-5p           | 1 |
| <i>circSPPL3</i> | miR-4482-3p           | 1 |
| <i>circSPPL3</i> | miR-4484              | 1 |
| <i>circSPPL3</i> | miR-4495              | 1 |
| <i>circSPPL3</i> | miR-4496              | 1 |
| <i>circSPPL3</i> | miR-4505/5787         | 1 |
| <i>circSPPL3</i> | miR-4517              | 4 |
| <i>circSPPL3</i> | miR-4519              | 1 |
| <i>circSPPL3</i> | miR-452-3p            | 2 |
| <i>circSPPL3</i> | miR-4522              | 2 |
| <i>circSPPL3</i> | miR-4529-5p           | 1 |
| <i>circSPPL3</i> | miR-4531              | 1 |
| <i>circSPPL3</i> | miR-455-5p            | 1 |
| <i>circSPPL3</i> | miR-4635              | 1 |
| <i>circSPPL3</i> | miR-4645-5p/4673      | 2 |
| <i>circSPPL3</i> | miR-4659a-3p/4659b-3p | 6 |
| <i>circSPPL3</i> | miR-4663              | 2 |
| <i>circSPPL3</i> | miR-4677-5p           | 2 |
| <i>circSPPL3</i> | miR-4682              | 2 |
| <i>circSPPL3</i> | miR-4690-5p           | 2 |
| <i>circSPPL3</i> | miR-4691-5p/6792-3p   | 2 |
| <i>circSPPL3</i> | miR-4716-5p           | 1 |
| <i>circSPPL3</i> | miR-4722-3p/6727-3p   | 1 |
| <i>circSPPL3</i> | miR-4722-5p           | 1 |
| <i>circSPPL3</i> | miR-4725-5p           | 1 |
| <i>circSPPL3</i> | miR-4726-3p           | 2 |
| <i>circSPPL3</i> | miR-4731-3p/4801      | 1 |
| <i>circSPPL3</i> | miR-4733-3p           | 1 |
| <i>circSPPL3</i> | miR-4752              | 2 |
| <i>circSPPL3</i> | miR-4753-3p           | 2 |
| <i>circSPPL3</i> | miR-4766-5p           | 1 |
| <i>circSPPL3</i> | miR-4768-5p/6833-3p   | 3 |
| <i>circSPPL3</i> | miR-4773              | 1 |
| <i>circSPPL3</i> | miR-4778-3p           | 4 |
| <i>circSPPL3</i> | miR-4786-5p           | 1 |
| <i>circSPPL3</i> | miR-4797-3p           | 2 |

|                  |                             |   |
|------------------|-----------------------------|---|
| <i>circSPPL3</i> | miR-4800-5p                 | 2 |
| <i>circSPPL3</i> | miR-4803                    | 1 |
| <i>circSPPL3</i> | miR-4804-5p                 | 2 |
| <i>circSPPL3</i> | miR-483-3p.1                | 1 |
| <i>circSPPL3</i> | miR-484/3155                | 2 |
| <i>circSPPL3</i> | miR-488-3p                  | 1 |
| <i>circSPPL3</i> | miR-490-5p                  | 1 |
| <i>circSPPL3</i> | miR-493-5p                  | 2 |
| <i>circSPPL3</i> | miR-498                     | 2 |
| <i>circSPPL3</i> | miR-5000-5p                 | 2 |
| <i>circSPPL3</i> | miR-5006-5p                 | 1 |
| <i>circSPPL3</i> | miR-502-5p                  | 1 |
| <i>circSPPL3</i> | miR-504-5p.1                | 1 |
| <i>circSPPL3</i> | miR-5088-3p                 | 1 |
| <i>circSPPL3</i> | miR-5092                    | 1 |
| <i>circSPPL3</i> | miR-5096                    | 3 |
| <i>circSPPL3</i> | miR-512-5p                  | 2 |
| <i>circSPPL3</i> | miR-513a-3p/513c-3p/3606-3p | 1 |
| <i>circSPPL3</i> | miR-513c-5p/514b-5p         | 1 |
| <i>circSPPL3</i> | miR-519-3p                  | 1 |
| <i>circSPPL3</i> | miR-5193                    | 1 |
| <i>circSPPL3</i> | miR-520g-3p                 | 1 |
| <i>circSPPL3</i> | miR-526b-5p                 | 1 |
| <i>circSPPL3</i> | miR-548ah-5p/3609           | 1 |
| <i>circSPPL3</i> | miR-548an                   | 1 |
| <i>circSPPL3</i> | miR-548ao-3p                | 1 |
| <i>circSPPL3</i> | miR-548c-3p                 | 1 |
| <i>circSPPL3</i> | miR-548g-3p                 | 1 |
| <i>circSPPL3</i> | miR-548s                    | 1 |
| <i>circSPPL3</i> | miR-550b-2-5p               | 1 |
| <i>circSPPL3</i> | miR-552-5p                  | 1 |
| <i>circSPPL3</i> | miR-554                     | 1 |
| <i>circSPPL3</i> | miR-5571-5p                 | 1 |
| <i>circSPPL3</i> | miR-5579-3p                 | 1 |
| <i>circSPPL3</i> | miR-5583-3p                 | 4 |
| <i>circSPPL3</i> | miR-5591-3p                 | 2 |
| <i>circSPPL3</i> | miR-562                     | 2 |
| <i>circSPPL3</i> | miR-5681a                   | 1 |

|                  |                  |   |
|------------------|------------------|---|
| <i>circSPPL3</i> | miR-5684         | 2 |
| <i>circSPPL3</i> | miR-5697         | 2 |
| <i>circSPPL3</i> | miR-571          | 2 |
| <i>circSPPL3</i> | miR-578          | 1 |
| <i>circSPPL3</i> | miR-588          | 1 |
| <i>circSPPL3</i> | miR-589-3p       | 1 |
| <i>circSPPL3</i> | miR-590-3p       | 1 |
| <i>circSPPL3</i> | miR-593-3p       | 2 |
| <i>circSPPL3</i> | miR-597-3p       | 1 |
| <i>circSPPL3</i> | miR-598-3p       | 2 |
| <i>circSPPL3</i> | miR-607          | 1 |
| <i>circSPPL3</i> | miR-6072/6891-3p | 2 |
| <i>circSPPL3</i> | miR-6081         | 2 |
| <i>circSPPL3</i> | miR-6083         | 1 |
| <i>circSPPL3</i> | miR-6124         | 1 |
| <i>circSPPL3</i> | miR-616-3p       | 2 |
| <i>circSPPL3</i> | miR-6165         | 2 |
| <i>circSPPL3</i> | miR-626/6876-3p  | 2 |
| <i>circSPPL3</i> | miR-627-3p       | 1 |
| <i>circSPPL3</i> | miR-628-5p       | 2 |
| <i>circSPPL3</i> | miR-629-3p       | 2 |
| <i>circSPPL3</i> | miR-631/3661     | 1 |
| <i>circSPPL3</i> | miR-632/4288     | 2 |
| <i>circSPPL3</i> | miR-640          | 1 |
| <i>circSPPL3</i> | miR-6501-3p      | 1 |
| <i>circSPPL3</i> | miR-651-3p       | 1 |
| <i>circSPPL3</i> | miR-6510-5p      | 2 |
| <i>circSPPL3</i> | miR-6511-3p      | 1 |
| <i>circSPPL3</i> | miR-6511-5p      | 1 |
| <i>circSPPL3</i> | miR-6516-3p      | 1 |
| <i>circSPPL3</i> | miR-653-3p       | 3 |
| <i>circSPPL3</i> | miR-656-5p       | 2 |
| <i>circSPPL3</i> | miR-657          | 2 |
| <i>circSPPL3</i> | miR-659-3p       | 2 |
| <i>circSPPL3</i> | miR-660-3p       | 1 |
| <i>circSPPL3</i> | miR-665          | 1 |
| <i>circSPPL3</i> | miR-6730-5p      | 1 |
| <i>circSPPL3</i> | miR-6734-3p      | 3 |

|                  |                     |   |
|------------------|---------------------|---|
| <i>circSPPL3</i> | miR-6739-3p         | 1 |
| <i>circSPPL3</i> | miR-6747-3p         | 1 |
| <i>circSPPL3</i> | miR-6749-3p         | 2 |
| <i>circSPPL3</i> | miR-6752-3p         | 1 |
| <i>circSPPL3</i> | miR-6768-3p         | 1 |
| <i>circSPPL3</i> | miR-6773-3p         | 4 |
| <i>circSPPL3</i> | miR-6776-3p         | 1 |
| <i>circSPPL3</i> | miR-6776-5p         | 2 |
| <i>circSPPL3</i> | miR-6782-3p         | 1 |
| <i>circSPPL3</i> | miR-6784-3p/6862-3p | 1 |
| <i>circSPPL3</i> | miR-6793-3p         | 1 |
| <i>circSPPL3</i> | miR-6800-3p         | 1 |
| <i>circSPPL3</i> | miR-6809-3p         | 3 |
| <i>circSPPL3</i> | miR-6815-3p         | 2 |
| <i>circSPPL3</i> | miR-6817-3p         | 4 |
| <i>circSPPL3</i> | miR-6818-3p         | 2 |
| <i>circSPPL3</i> | miR-6822-3p         | 2 |
| <i>circSPPL3</i> | miR-6833-5p         | 2 |
| <i>circSPPL3</i> | miR-6839-3p         | 1 |
| <i>circSPPL3</i> | miR-6840-3p         | 2 |
| <i>circSPPL3</i> | miR-6844            | 2 |
| <i>circSPPL3</i> | miR-6861-5p         | 2 |
| <i>circSPPL3</i> | miR-6863            | 1 |
| <i>circSPPL3</i> | miR-6865-3p         | 1 |
| <i>circSPPL3</i> | miR-6868-3p         | 2 |
| <i>circSPPL3</i> | miR-6870-3p         | 1 |
| <i>circSPPL3</i> | miR-6873-3p         | 4 |
| <i>circSPPL3</i> | miR-6874-5p         | 2 |
| <i>circSPPL3</i> | miR-6875-3p         | 6 |
| <i>circSPPL3</i> | miR-6880-3p         | 1 |
| <i>circSPPL3</i> | miR-6885-3p         | 1 |
| <i>circSPPL3</i> | miR-6888-3p         | 7 |
| <i>circSPPL3</i> | miR-6890-3p         | 2 |
| <i>circSPPL3</i> | miR-6895-3p         | 2 |
| <i>circSPPL3</i> | miR-7-3p            | 2 |
| <i>circSPPL3</i> | miR-7110-3p         | 4 |
| <i>circSPPL3</i> | miR-7114-5p         | 2 |
| <i>circSPPL3</i> | miR-7153-3p         | 1 |

|                  |                     |   |
|------------------|---------------------|---|
| <i>circSPPL3</i> | miR-7154-5p         | 1 |
| <i>circSPPL3</i> | miR-7159-3p         | 1 |
| <i>circSPPL3</i> | miR-7160-5p         | 2 |
| <i>circSPPL3</i> | miR-760             | 2 |
| <i>circSPPL3</i> | miR-767-3p          | 1 |
| <i>circSPPL3</i> | miR-769-5p          | 1 |
| <i>circSPPL3</i> | miR-7705            | 1 |
| <i>circSPPL3</i> | miR-7849-3p         | 2 |
| <i>circSPPL3</i> | miR-8077            | 2 |
| <i>circSPPL3</i> | miR-8078            | 1 |
| <i>circSPPL3</i> | miR-873-5p.1        | 1 |
| <i>circSPPL3</i> | miR-873-5p.2        | 1 |
| <i>circSPPL3</i> | miR-876-5p          | 1 |
| <i>circSPPL3</i> | miR-877-3p          | 2 |
| <i>circSPPL3</i> | miR-891a-5p         | 1 |
| <i>circSPPL3</i> | miR-9-5p            | 2 |
| <i>circSPPL3</i> | miR-922             | 2 |
| <i>circSPPL3</i> | miR-93-3p           | 4 |
| <i>circSPPL3</i> | miR-942-5p          | 3 |
| <i>circSPPL3</i> | miR-101-3p.1        | 1 |
| <i>circSPPL3</i> | miR-1269            | 1 |
| <i>circSPPL3</i> | miR-1305            | 1 |
| <i>circSPPL3</i> | miR-144-3p          | 1 |
| <i>circSPPL3</i> | miR-148b-5p/6874-3p | 1 |
| <i>circSPPL3</i> | miR-183-5p.1        | 1 |
| <i>circSPPL3</i> | miR-193a-5p         | 1 |
| <i>circSPPL3</i> | miR-204-5p/211-5p   | 1 |
| <i>circSPPL3</i> | miR-3168            | 1 |
| <i>circSPPL3</i> | miR-3173-3p/6891-5p | 1 |
| <i>circSPPL3</i> | miR-3182            | 1 |
| <i>circSPPL3</i> | miR-4281            | 1 |
| <i>circSPPL3</i> | miR-4428            | 1 |
| <i>circSPPL3</i> | miR-4434/4516/5703  | 1 |
| <i>circSPPL3</i> | miR-4524b-3p        | 1 |
| <i>circSPPL3</i> | miR-4645-3p         | 1 |
| <i>circSPPL3</i> | miR-4662a-3p        | 1 |
| <i>circSPPL3</i> | miR-4668-3p         | 1 |
| <i>circSPPL3</i> | miR-5009-5p/8058    | 1 |



|                   |                       |   |
|-------------------|-----------------------|---|
| <i>circSPPL3</i>  | miR-510-3p            | 1 |
| <i>circSPPL3</i>  | miR-5197-5p           | 1 |
| <i>circSPPL3</i>  | miR-539-5p            | 1 |
| <i>circSPPL3</i>  | miR-545-5p            | 1 |
| <i>circSPPL3</i>  | miR-548u/7161-5p      | 1 |
| <i>circSPPL3</i>  | miR-551b-5p           | 1 |
| <i>circSPPL3</i>  | miR-5584-3p           | 1 |
| <i>circSPPL3</i>  | miR-577               | 1 |
| <i>circSPPL3</i>  | miR-623               | 1 |
| <i>circSPPL3</i>  | miR-633               | 1 |
| <i>circSPPL3</i>  | miR-641/3617-5p       | 1 |
| <i>circSPPL3</i>  | miR-6830-3p           | 1 |
| <i>circSPPL3</i>  | miR-6888-5p           | 1 |
| <i>circSPPL3</i>  | miR-802               | 1 |
| <i>circSPPL3</i>  | miR-8076              | 1 |
| <i>circSPPL3</i>  | miR-889-3p            | 1 |
| <i>circSSX2IP</i> | let-7a-2-3p/let-7g-3p | 1 |
| <i>circSSX2IP</i> | let-7c-3p             | 1 |
| <i>circSSX2IP</i> | miR-1-3p/206          | 2 |
| <i>circSSX2IP</i> | miR-1-5p              | 2 |
| <i>circSSX2IP</i> | miR-101-3p.1          | 1 |
| <i>circSSX2IP</i> | miR-101-5p            | 1 |
| <i>circSSX2IP</i> | miR-103-3p/107        | 2 |
| <i>circSSX2IP</i> | miR-103a-2-5p         | 1 |
| <i>circSSX2IP</i> | miR-105-5p            | 2 |
| <i>circSSX2IP</i> | miR-1178-3p           | 1 |
| <i>circSSX2IP</i> | miR-1183              | 1 |
| <i>circSSX2IP</i> | miR-1193              | 1 |
| <i>circSSX2IP</i> | miR-1224-5p           | 1 |
| <i>circSSX2IP</i> | miR-1229-3p           | 1 |
| <i>circSSX2IP</i> | miR-1233-3p           | 1 |
| <i>circSSX2IP</i> | miR-1233-5p/6778-5p   | 2 |
| <i>circSSX2IP</i> | miR-1236-3p           | 2 |
| <i>circSSX2IP</i> | miR-1236-5p           | 2 |
| <i>circSSX2IP</i> | miR-1237-3p           | 5 |
| <i>circSSX2IP</i> | miR-1238-3p           | 2 |
| <i>circSSX2IP</i> | miR-124-5p            | 1 |
| <i>circSSX2IP</i> | miR-1243              | 2 |

|                   |                     |    |
|-------------------|---------------------|----|
| <i>circSSX2IP</i> | miR-1245a/8079      | 2  |
| <i>circSSX2IP</i> | miR-1246            | 1  |
| <i>circSSX2IP</i> | miR-1247-3p         | 2  |
| <i>circSSX2IP</i> | miR-1247-5p         | 1  |
| <i>circSSX2IP</i> | miR-1248            | 5  |
| <i>circSSX2IP</i> | miR-1249-5p/6797-5p | 2  |
| <i>circSSX2IP</i> | miR-125-5p          | 1  |
| <i>circSSX2IP</i> | miR-1250-3p         | 6  |
| <i>circSSX2IP</i> | miR-1251-5p         | 2  |
| <i>circSSX2IP</i> | miR-1252-3p         | 7  |
| <i>circSSX2IP</i> | miR-1252-5p         | 1  |
| <i>circSSX2IP</i> | miR-1254/3116       | 2  |
| <i>circSSX2IP</i> | miR-1255a/1255b-5p  | 2  |
| <i>circSSX2IP</i> | miR-1255b-2-3p      | 3  |
| <i>circSSX2IP</i> | miR-1257            | 1  |
| <i>circSSX2IP</i> | miR-125a-3p         | 1  |
| <i>circSSX2IP</i> | miR-1264            | 1  |
| <i>circSSX2IP</i> | miR-1266-5p/4518    | 5  |
| <i>circSSX2IP</i> | miR-127-5p          | 4  |
| <i>circSSX2IP</i> | miR-1270            | 5  |
| <i>circSSX2IP</i> | miR-1272            | 6  |
| <i>circSSX2IP</i> | miR-1273d           | 1  |
| <i>circSSX2IP</i> | miR-1273e           | 2  |
| <i>circSSX2IP</i> | miR-1273f           | 2  |
| <i>circSSX2IP</i> | miR-1273g-3p        | 2  |
| <i>circSSX2IP</i> | miR-1273g-5p        | 1  |
| <i>circSSX2IP</i> | miR-1273h-3p        | 3  |
| <i>circSSX2IP</i> | miR-1276            | 14 |
| <i>circSSX2IP</i> | miR-1277-3p         | 1  |
| <i>circSSX2IP</i> | miR-1277-5p         | 6  |
| <i>circSSX2IP</i> | miR-1278            | 1  |
| <i>circSSX2IP</i> | miR-128-3p          | 2  |
| <i>circSSX2IP</i> | miR-1284            | 2  |
| <i>circSSX2IP</i> | miR-1285-5p         | 3  |
| <i>circSSX2IP</i> | miR-1287-3p         | 2  |
| <i>circSSX2IP</i> | miR-1288-3p         | 2  |
| <i>circSSX2IP</i> | miR-1288-5p         | 2  |
| <i>circSSX2IP</i> | miR-129-5p          | 4  |

|                   |                                      |   |
|-------------------|--------------------------------------|---|
| <i>circSSX2IP</i> | miR-1290                             | 1 |
| <i>circSSX2IP</i> | miR-1292-5p                          | 2 |
| <i>circSSX2IP</i> | miR-1295b-3p                         | 1 |
| <i>circSSX2IP</i> | miR-1301-5p/6502-5p                  | 2 |
| <i>circSSX2IP</i> | miR-1302/4298                        | 2 |
| <i>circSSX2IP</i> | miR-1305                             | 2 |
| <i>circSSX2IP</i> | miR-130b-5p                          | 1 |
| <i>circSSX2IP</i> | miR-132-3p/212-3p                    | 3 |
| <i>circSSX2IP</i> | miR-1322                             | 6 |
| <i>circSSX2IP</i> | miR-1323                             | 4 |
| <i>circSSX2IP</i> | miR-1324                             | 2 |
| <i>circSSX2IP</i> | miR-133a-3p.1                        | 2 |
| <i>circSSX2IP</i> | miR-134-3p                           | 2 |
| <i>circSSX2IP</i> | miR-1343-3p                          | 4 |
| <i>circSSX2IP</i> | miR-135-5p                           | 1 |
| <i>circSSX2IP</i> | miR-136-5p                           | 3 |
| <i>circSSX2IP</i> | miR-138-2-3p                         | 2 |
| <i>circSSX2IP</i> | miR-139-3p                           | 3 |
| <i>circSSX2IP</i> | miR-139-5p                           | 2 |
| <i>circSSX2IP</i> | miR-140-5p                           | 1 |
| <i>circSSX2IP</i> | miR-141-5p                           | 1 |
| <i>circSSX2IP</i> | miR-142-3p.1                         | 1 |
| <i>circSSX2IP</i> | miR-143-3p                           | 2 |
| <i>circSSX2IP</i> | miR-144-3p                           | 1 |
| <i>circSSX2IP</i> | miR-145-3p                           | 2 |
| <i>circSSX2IP</i> | miR-145-5p                           | 1 |
| <i>circSSX2IP</i> | miR-146-5p                           | 1 |
| <i>circSSX2IP</i> | miR-1468-3p                          | 3 |
| <i>circSSX2IP</i> | miR-146a-3p                          | 4 |
| <i>circSSX2IP</i> | miR-147a                             | 1 |
| <i>circSSX2IP</i> | miR-148-3p/152-3p                    | 2 |
| <i>circSSX2IP</i> | miR-149-5p                           | 2 |
| <i>circSSX2IP</i> | miR-15-5p/16-5p/195-5p/424-5p/497-5p | 8 |
| <i>circSSX2IP</i> | miR-150-5p                           | 1 |
| <i>circSSX2IP</i> | miR-151-3p                           | 2 |
| <i>circSSX2IP</i> | miR-152-5p                           | 2 |
| <i>circSSX2IP</i> | miR-153-3p                           | 3 |
| <i>circSSX2IP</i> | miR-153-5p                           | 1 |

|                   |                                     |   |
|-------------------|-------------------------------------|---|
| <i>circSSX2IP</i> | miR-1537-5p                         | 2 |
| <i>circSSX2IP</i> | miR-154-5p                          | 1 |
| <i>circSSX2IP</i> | miR-155-3p                          | 1 |
| <i>circSSX2IP</i> | miR-1587/3620-5p                    | 2 |
| <i>circSSX2IP</i> | miR-16-1-3p                         | 2 |
| <i>circSSX2IP</i> | miR-16-2-3p/195-3p                  | 2 |
| <i>circSSX2IP</i> | miR-17-5p/20-5p/93-5p/106-5p/519-3p | 1 |
| <i>circSSX2IP</i> | miR-18-5p                           | 1 |
| <i>circSSX2IP</i> | miR-183-3p                          | 2 |
| <i>circSSX2IP</i> | miR-185-3p                          | 2 |
| <i>circSSX2IP</i> | miR-185-5p                          | 5 |
| <i>circSSX2IP</i> | miR-186-5p                          | 9 |
| <i>circSSX2IP</i> | miR-19-3p                           | 1 |
| <i>circSSX2IP</i> | miR-190-5p                          | 3 |
| <i>circSSX2IP</i> | miR-190a-3p                         | 3 |
| <i>circSSX2IP</i> | miR-1914-5p                         | 2 |
| <i>circSSX2IP</i> | miR-1915-3p/6764-5p                 | 1 |
| <i>circSSX2IP</i> | miR-1915-5p                         | 1 |
| <i>circSSX2IP</i> | miR-194-3p                          | 2 |
| <i>circSSX2IP</i> | miR-194-5p                          | 1 |
| <i>circSSX2IP</i> | miR-196b-3p                         | 2 |
| <i>circSSX2IP</i> | miR-1976                            | 2 |
| <i>circSSX2IP</i> | miR-198                             | 2 |
| <i>circSSX2IP</i> | miR-199-3p                          | 1 |
| <i>circSSX2IP</i> | miR-202-5p                          | 1 |
| <i>circSSX2IP</i> | miR-203a-3p.1                       | 8 |
| <i>circSSX2IP</i> | miR-203a-5p                         | 1 |
| <i>circSSX2IP</i> | miR-203b-3p                         | 2 |
| <i>circSSX2IP</i> | miR-204-3p/4646-5p                  | 4 |
| <i>circSSX2IP</i> | miR-204-5p/211-5p                   | 2 |
| <i>circSSX2IP</i> | miR-205-3p                          | 3 |
| <i>circSSX2IP</i> | miR-205-5p                          | 2 |
| <i>circSSX2IP</i> | miR-2054                            | 2 |
| <i>circSSX2IP</i> | miR-208-5p                          | 3 |
| <i>circSSX2IP</i> | miR-20a-3p                          | 3 |
| <i>circSSX2IP</i> | miR-21-5p/590-5p                    | 2 |
| <i>circSSX2IP</i> | miR-210-5p                          | 1 |
| <i>circSSX2IP</i> | miR-2113                            | 2 |

|                   |                                     |   |
|-------------------|-------------------------------------|---|
| <i>circSSX2IP</i> | miR-2115-3p                         | 3 |
| <i>circSSX2IP</i> | miR-2116-3p                         | 1 |
| <i>circSSX2IP</i> | miR-2116-5p                         | 4 |
| <i>circSSX2IP</i> | miR-212-5p                          | 2 |
| <i>circSSX2IP</i> | miR-214-3p/3619-5p                  | 6 |
| <i>circSSX2IP</i> | miR-216a-5p                         | 1 |
| <i>circSSX2IP</i> | miR-216b-3p                         | 1 |
| <i>circSSX2IP</i> | miR-216b-5p                         | 1 |
| <i>circSSX2IP</i> | miR-217                             | 2 |
| <i>circSSX2IP</i> | miR-218-5p                          | 2 |
| <i>circSSX2IP</i> | miR-219a-1-3p                       | 1 |
| <i>circSSX2IP</i> | miR-219a-2-3p                       | 2 |
| <i>circSSX2IP</i> | miR-219b-3p                         | 2 |
| <i>circSSX2IP</i> | miR-219b-5p                         | 2 |
| <i>circSSX2IP</i> | miR-22-3p                           | 4 |
| <i>circSSX2IP</i> | miR-22-5p                           | 4 |
| <i>circSSX2IP</i> | miR-221-5p/8073                     | 2 |
| <i>circSSX2IP</i> | miR-222-5p                          | 1 |
| <i>circSSX2IP</i> | miR-224-5p                          | 2 |
| <i>circSSX2IP</i> | miR-2277-3p                         | 2 |
| <i>circSSX2IP</i> | miR-2278                            | 4 |
| <i>circSSX2IP</i> | miR-23-3p                           | 1 |
| <i>circSSX2IP</i> | miR-2355-3p                         | 2 |
| <i>circSSX2IP</i> | miR-2355-5p                         | 2 |
| <i>circSSX2IP</i> | miR-2392                            | 3 |
| <i>circSSX2IP</i> | miR-24-3p                           | 2 |
| <i>circSSX2IP</i> | miR-24-5p                           | 2 |
| <i>circSSX2IP</i> | miR-2467-3p                         | 3 |
| <i>circSSX2IP</i> | miR-2467-5p                         | 2 |
| <i>circSSX2IP</i> | miR-25-3p/32-5p/92-3p/363-3p/367-3p | 1 |
| <i>circSSX2IP</i> | miR-26-3p                           | 2 |
| <i>circSSX2IP</i> | miR-26-5p                           | 2 |
| <i>circSSX2IP</i> | miR-2681-3p                         | 2 |
| <i>circSSX2IP</i> | miR-2681-5p                         | 2 |
| <i>circSSX2IP</i> | miR-27-3p                           | 3 |
| <i>circSSX2IP</i> | miR-27a-5p                          | 2 |
| <i>circSSX2IP</i> | miR-29-3p                           | 1 |
| <i>circSSX2IP</i> | miR-297                             | 2 |

|                   |                                              |   |
|-------------------|----------------------------------------------|---|
| <i>circSSX2IP</i> | miR-298                                      | 5 |
| <i>circSSX2IP</i> | miR-299-3p                                   | 4 |
| <i>circSSX2IP</i> | miR-29a-5p                                   | 4 |
| <i>circSSX2IP</i> | miR-29b-1-5p                                 | 2 |
| <i>circSSX2IP</i> | miR-29b-2-5p                                 | 2 |
| <i>circSSX2IP</i> | miR-30-3p                                    | 4 |
| <i>circSSX2IP</i> | miR-301a-5p/301b-5p                          | 1 |
| <i>circSSX2IP</i> | miR-302-3p/372-3p/373-3p/520-3p              | 3 |
| <i>circSSX2IP</i> | miR-302b-5p/302d-5p                          | 1 |
| <i>circSSX2IP</i> | miR-302c-3p.2/520-3p                         | 2 |
| <i>circSSX2IP</i> | miR-3065-5p                                  | 2 |
| <i>circSSX2IP</i> | miR-3074-3p                                  | 2 |
| <i>circSSX2IP</i> | miR-3074-5p                                  | 2 |
| <i>circSSX2IP</i> | miR-30b-3p/1273h-5p/3689-3p/6779-5p/6780a-5p | 2 |
| <i>circSSX2IP</i> | miR-30c-3p/6788-5p                           | 2 |
| <i>circSSX2IP</i> | miR-31-3p                                    | 4 |
| <i>circSSX2IP</i> | miR-3115                                     | 2 |
| <i>circSSX2IP</i> | miR-3120-3p                                  | 6 |
| <i>circSSX2IP</i> | miR-3120-5p                                  | 1 |
| <i>circSSX2IP</i> | miR-3121-3p                                  | 1 |
| <i>circSSX2IP</i> | miR-3121-5p                                  | 1 |
| <i>circSSX2IP</i> | miR-3122/3913-5p                             | 1 |
| <i>circSSX2IP</i> | miR-3123                                     | 4 |
| <i>circSSX2IP</i> | miR-3124-3p                                  | 2 |
| <i>circSSX2IP</i> | miR-3126-5p                                  | 4 |
| <i>circSSX2IP</i> | miR-3129-3p/5583-5p                          | 3 |
| <i>circSSX2IP</i> | miR-3130-3p                                  | 2 |
| <i>circSSX2IP</i> | miR-3133                                     | 9 |
| <i>circSSX2IP</i> | miR-3134                                     | 2 |
| <i>circSSX2IP</i> | miR-3136-5p/4439                             | 2 |
| <i>circSSX2IP</i> | miR-3140-3p                                  | 1 |
| <i>circSSX2IP</i> | miR-3143                                     | 1 |
| <i>circSSX2IP</i> | miR-3144-3p                                  | 2 |
| <i>circSSX2IP</i> | miR-3145-3p                                  | 1 |
| <i>circSSX2IP</i> | miR-3148                                     | 6 |
| <i>circSSX2IP</i> | miR-3149                                     | 3 |
| <i>circSSX2IP</i> | miR-3150a-5p/3150b-5p                        | 2 |
| <i>circSSX2IP</i> | miR-3153/6733-5p/6739-5p                     | 2 |

|                   |                           |    |
|-------------------|---------------------------|----|
| <i>circSSX2IP</i> | miR-3154                  | 2  |
| <i>circSSX2IP</i> | miR-3160-3p               | 6  |
| <i>circSSX2IP</i> | miR-3161                  | 3  |
| <i>circSSX2IP</i> | miR-3163                  | 2  |
| <i>circSSX2IP</i> | miR-3169                  | 2  |
| <i>circSSX2IP</i> | miR-3171                  | 1  |
| <i>circSSX2IP</i> | miR-3174                  | 1  |
| <i>circSSX2IP</i> | miR-3182                  | 2  |
| <i>circSSX2IP</i> | miR-3184-3p               | 1  |
| <i>circSSX2IP</i> | miR-3185                  | 12 |
| <i>circSSX2IP</i> | miR-3188                  | 2  |
| <i>circSSX2IP</i> | miR-3189-3p               | 2  |
| <i>circSSX2IP</i> | miR-3192-5p               | 4  |
| <i>circSSX2IP</i> | miR-3193                  | 1  |
| <i>circSSX2IP</i> | miR-32-3p                 | 1  |
| <i>circSSX2IP</i> | miR-320                   | 2  |
| <i>circSSX2IP</i> | miR-3200-3p               | 2  |
| <i>circSSX2IP</i> | miR-3201/4791             | 1  |
| <i>circSSX2IP</i> | miR-3202                  | 1  |
| <i>circSSX2IP</i> | miR-320e                  | 2  |
| <i>circSSX2IP</i> | miR-323a-5p               | 1  |
| <i>circSSX2IP</i> | miR-33-5p                 | 1  |
| <i>circSSX2IP</i> | miR-330-3p.2              | 2  |
| <i>circSSX2IP</i> | miR-331-3p                | 1  |
| <i>circSSX2IP</i> | miR-335-3p                | 4  |
| <i>circSSX2IP</i> | miR-337-3p                | 1  |
| <i>circSSX2IP</i> | miR-338-5p                | 1  |
| <i>circSSX2IP</i> | miR-33a-3p                | 2  |
| <i>circSSX2IP</i> | miR-33b-3p/515-3p/519e-3p | 4  |
| <i>circSSX2IP</i> | miR-340-5p                | 2  |
| <i>circSSX2IP</i> | miR-342-3p                | 2  |
| <i>circSSX2IP</i> | miR-34a-3p                | 2  |
| <i>circSSX2IP</i> | miR-34b-3p                | 1  |
| <i>circSSX2IP</i> | miR-34c-3p                | 1  |
| <i>circSSX2IP</i> | miR-3607-3p               | 3  |
| <i>circSSX2IP</i> | miR-3611                  | 3  |
| <i>circSSX2IP</i> | miR-3613-3p               | 2  |
| <i>circSSX2IP</i> | miR-3613-5p               | 1  |

|                   |                                   |   |
|-------------------|-----------------------------------|---|
| <i>circSSX2IP</i> | miR-3617-3p                       | 2 |
| <i>circSSX2IP</i> | miR-3618                          | 1 |
| <i>circSSX2IP</i> | miR-3619-3p                       | 2 |
| <i>circSSX2IP</i> | miR-3620-3p                       | 1 |
| <i>circSSX2IP</i> | miR-3622a-3p/3622b-3p             | 1 |
| <i>circSSX2IP</i> | miR-3646                          | 7 |
| <i>circSSX2IP</i> | miR-3649                          | 2 |
| <i>circSSX2IP</i> | miR-3653-3p                       | 8 |
| <i>circSSX2IP</i> | miR-3653-5p                       | 2 |
| <i>circSSX2IP</i> | miR-3654                          | 2 |
| <i>circSSX2IP</i> | miR-3658                          | 4 |
| <i>circSSX2IP</i> | miR-3660/4526                     | 1 |
| <i>circSSX2IP</i> | miR-3662                          | 6 |
| <i>circSSX2IP</i> | miR-3663-3p                       | 1 |
| <i>circSSX2IP</i> | miR-3664-3p                       | 5 |
| <i>circSSX2IP</i> | miR-3667-5p                       | 1 |
| <i>circSSX2IP</i> | miR-3668                          | 3 |
| <i>circSSX2IP</i> | miR-3672/6864-3p                  | 1 |
| <i>circSSX2IP</i> | miR-3675-3p                       | 2 |
| <i>circSSX2IP</i> | miR-3678-3p                       | 3 |
| <i>circSSX2IP</i> | miR-3680-3p                       | 2 |
| <i>circSSX2IP</i> | miR-3680-5p                       | 2 |
| <i>circSSX2IP</i> | miR-3681-5p                       | 2 |
| <i>circSSX2IP</i> | miR-3682-3p                       | 6 |
| <i>circSSX2IP</i> | miR-3682-5p                       | 1 |
| <i>circSSX2IP</i> | miR-3685                          | 1 |
| <i>circSSX2IP</i> | miR-3688-3p                       | 4 |
| <i>circSSX2IP</i> | miR-3689a-5p/3689b-5p/3689e/3689f | 2 |
| <i>circSSX2IP</i> | miR-369-3p                        | 5 |
| <i>circSSX2IP</i> | miR-3690                          | 3 |
| <i>circSSX2IP</i> | miR-3691-3p                       | 1 |
| <i>circSSX2IP</i> | miR-3692-5p                       | 2 |
| <i>circSSX2IP</i> | miR-371-5p                        | 4 |
| <i>circSSX2IP</i> | miR-3713                          | 3 |
| <i>circSSX2IP</i> | miR-371a-3p                       | 4 |
| <i>circSSX2IP</i> | miR-371b-3p                       | 4 |
| <i>circSSX2IP</i> | miR-371b-5p/373-5p/616-5p         | 4 |
| <i>circSSX2IP</i> | miR-372-5p                        | 4 |



|                   |                     |   |
|-------------------|---------------------|---|
| <i>circSSX2IP</i> | miR-374-5p          | 3 |
| <i>circSSX2IP</i> | miR-374-5p/655-3p   | 1 |
| <i>circSSX2IP</i> | miR-375             | 3 |
| <i>circSSX2IP</i> | miR-376a-2-5p       | 1 |
| <i>circSSX2IP</i> | miR-376a-5p         | 1 |
| <i>circSSX2IP</i> | miR-376c-3p         | 2 |
| <i>circSSX2IP</i> | miR-380-3p          | 3 |
| <i>circSSX2IP</i> | miR-382-3p          | 2 |
| <i>circSSX2IP</i> | miR-382-5p          | 1 |
| <i>circSSX2IP</i> | miR-383-5p.1        | 1 |
| <i>circSSX2IP</i> | miR-384             | 1 |
| <i>circSSX2IP</i> | miR-3908            | 1 |
| <i>circSSX2IP</i> | miR-3909            | 1 |
| <i>circSSX2IP</i> | miR-3911            | 1 |
| <i>circSSX2IP</i> | miR-3914            | 6 |
| <i>circSSX2IP</i> | miR-3915            | 1 |
| <i>circSSX2IP</i> | miR-3919            | 4 |
| <i>circSSX2IP</i> | miR-3921/4653-5p    | 1 |
| <i>circSSX2IP</i> | miR-3923            | 2 |
| <i>circSSX2IP</i> | miR-3924            | 1 |
| <i>circSSX2IP</i> | miR-3925-3p         | 2 |
| <i>circSSX2IP</i> | miR-3925-5p         | 4 |
| <i>circSSX2IP</i> | miR-3927-5p         | 1 |
| <i>circSSX2IP</i> | miR-3928-3p         | 1 |
| <i>circSSX2IP</i> | miR-3928-5p/6806-3p | 4 |
| <i>circSSX2IP</i> | miR-3934-3p         | 5 |
| <i>circSSX2IP</i> | miR-3934-5p         | 1 |
| <i>circSSX2IP</i> | miR-3935            | 2 |
| <i>circSSX2IP</i> | miR-3941            | 1 |
| <i>circSSX2IP</i> | miR-3942-3p         | 1 |
| <i>circSSX2IP</i> | miR-3942-5p         | 1 |
| <i>circSSX2IP</i> | miR-3943            | 1 |
| <i>circSSX2IP</i> | miR-3975            | 2 |
| <i>circSSX2IP</i> | miR-3977            | 3 |
| <i>circSSX2IP</i> | miR-3978            | 6 |
| <i>circSSX2IP</i> | miR-409-3p          | 2 |
| <i>circSSX2IP</i> | miR-410-3p          | 2 |
| <i>circSSX2IP</i> | miR-411-3p          | 2 |

|                   |                           |    |
|-------------------|---------------------------|----|
| <i>circSSX2IP</i> | miR-411-5p.1              | 2  |
| <i>circSSX2IP</i> | miR-411-5p.2              | 2  |
| <i>circSSX2IP</i> | miR-412-3p/6754-3p        | 3  |
| <i>circSSX2IP</i> | miR-421                   | 3  |
| <i>circSSX2IP</i> | miR-425-3p                | 2  |
| <i>circSSX2IP</i> | miR-4251                  | 2  |
| <i>circSSX2IP</i> | miR-4254                  | 3  |
| <i>circSSX2IP</i> | miR-4256                  | 1  |
| <i>circSSX2IP</i> | miR-4261                  | 2  |
| <i>circSSX2IP</i> | miR-4263                  | 1  |
| <i>circSSX2IP</i> | miR-4264                  | 2  |
| <i>circSSX2IP</i> | miR-4265/4296/4322        | 2  |
| <i>circSSX2IP</i> | miR-4268                  | 3  |
| <i>circSSX2IP</i> | miR-4271/4725-3p/6780b-5p | 2  |
| <i>circSSX2IP</i> | miR-4273/7156-5p          | 2  |
| <i>circSSX2IP</i> | miR-4274                  | 1  |
| <i>circSSX2IP</i> | miR-4276                  | 3  |
| <i>circSSX2IP</i> | miR-4279                  | 2  |
| <i>circSSX2IP</i> | miR-4280                  | 1  |
| <i>circSSX2IP</i> | miR-4281                  | 2  |
| <i>circSSX2IP</i> | miR-4282                  | 5  |
| <i>circSSX2IP</i> | miR-4283                  | 1  |
| <i>circSSX2IP</i> | miR-4284                  | 2  |
| <i>circSSX2IP</i> | miR-4289                  | 2  |
| <i>circSSX2IP</i> | miR-4291                  | 4  |
| <i>circSSX2IP</i> | miR-4297/5581-5p          | 2  |
| <i>circSSX2IP</i> | miR-4302                  | 2  |
| <i>circSSX2IP</i> | miR-4305                  | 2  |
| <i>circSSX2IP</i> | miR-4307                  | 4  |
| <i>circSSX2IP</i> | miR-4310/7157-5p          | 2  |
| <i>circSSX2IP</i> | miR-4311                  | 14 |
| <i>circSSX2IP</i> | miR-4312                  | 1  |
| <i>circSSX2IP</i> | miR-4317                  | 1  |
| <i>circSSX2IP</i> | miR-4318                  | 2  |
| <i>circSSX2IP</i> | miR-432-3p                | 3  |
| <i>circSSX2IP</i> | miR-4323                  | 1  |
| <i>circSSX2IP</i> | miR-4324                  | 1  |
| <i>circSSX2IP</i> | miR-4326                  | 2  |

|                   |                                    |   |
|-------------------|------------------------------------|---|
| <i>circSSX2IP</i> | miR-4328                           | 4 |
| <i>circSSX2IP</i> | miR-4329                           | 2 |
| <i>circSSX2IP</i> | miR-433-3p                         | 1 |
| <i>circSSX2IP</i> | miR-4330                           | 3 |
| <i>circSSX2IP</i> | miR-4419a/4510/6127/6129/6130/6133 | 4 |
| <i>circSSX2IP</i> | miR-4422                           | 2 |
| <i>circSSX2IP</i> | miR-4423-5p                        | 1 |
| <i>circSSX2IP</i> | miR-4424                           | 3 |
| <i>circSSX2IP</i> | miR-4426/4647/4662b                | 9 |
| <i>circSSX2IP</i> | miR-4433a-3p                       | 3 |
| <i>circSSX2IP</i> | miR-4433a-5p                       | 1 |
| <i>circSSX2IP</i> | miR-4433b-5p                       | 1 |
| <i>circSSX2IP</i> | miR-4434/4516/5703                 | 2 |
| <i>circSSX2IP</i> | miR-4436b-5p                       | 1 |
| <i>circSSX2IP</i> | miR-4437                           | 1 |
| <i>circSSX2IP</i> | miR-4443                           | 2 |
| <i>circSSX2IP</i> | miR-4444                           | 1 |
| <i>circSSX2IP</i> | miR-4448                           | 3 |
| <i>circSSX2IP</i> | miR-4452                           | 2 |
| <i>circSSX2IP</i> | miR-4453/4538                      | 2 |
| <i>circSSX2IP</i> | miR-4457                           | 1 |
| <i>circSSX2IP</i> | miR-4459                           | 3 |
| <i>circSSX2IP</i> | miR-4463                           | 2 |
| <i>circSSX2IP</i> | miR-4464/4748                      | 1 |
| <i>circSSX2IP</i> | miR-4468                           | 4 |
| <i>circSSX2IP</i> | miR-4471/8059                      | 2 |
| <i>circSSX2IP</i> | miR-4473                           | 1 |
| <i>circSSX2IP</i> | miR-4477a                          | 1 |
| <i>circSSX2IP</i> | miR-448                            | 3 |
| <i>circSSX2IP</i> | miR-4482-3p                        | 4 |
| <i>circSSX2IP</i> | miR-4487                           | 6 |
| <i>circSSX2IP</i> | miR-4489                           | 1 |
| <i>circSSX2IP</i> | miR-4490                           | 2 |
| <i>circSSX2IP</i> | miR-4491/4657                      | 4 |
| <i>circSSX2IP</i> | miR-4494                           | 1 |
| <i>circSSX2IP</i> | miR-4495                           | 5 |
| <i>circSSX2IP</i> | miR-4496                           | 6 |
| <i>circSSX2IP</i> | miR-4499                           | 2 |

|                   |                       |   |
|-------------------|-----------------------|---|
| <i>circSSX2IP</i> | miR-4502              | 2 |
| <i>circSSX2IP</i> | miR-4504              | 3 |
| <i>circSSX2IP</i> | miR-4509              | 4 |
| <i>circSSX2IP</i> | miR-450a-1-3p         | 1 |
| <i>circSSX2IP</i> | miR-450b-3p/769-3p    | 3 |
| <i>circSSX2IP</i> | miR-450b-5p           | 2 |
| <i>circSSX2IP</i> | miR-4511              | 4 |
| <i>circSSX2IP</i> | miR-4515              | 2 |
| <i>circSSX2IP</i> | miR-4519              | 1 |
| <i>circSSX2IP</i> | miR-452-3p            | 1 |
| <i>circSSX2IP</i> | miR-452-5p/892-3p     | 4 |
| <i>circSSX2IP</i> | miR-4520-3p           | 2 |
| <i>circSSX2IP</i> | miR-4524-5p           | 2 |
| <i>circSSX2IP</i> | miR-4524a-3p          | 6 |
| <i>circSSX2IP</i> | miR-4524b-3p          | 4 |
| <i>circSSX2IP</i> | miR-4527/6503-5p      | 1 |
| <i>circSSX2IP</i> | miR-4528              | 3 |
| <i>circSSX2IP</i> | miR-4531              | 5 |
| <i>circSSX2IP</i> | miR-4533              | 1 |
| <i>circSSX2IP</i> | miR-4534/8082         | 2 |
| <i>circSSX2IP</i> | miR-4535              | 2 |
| <i>circSSX2IP</i> | miR-4539              | 2 |
| <i>circSSX2IP</i> | miR-455-5p            | 2 |
| <i>circSSX2IP</i> | miR-4635              | 2 |
| <i>circSSX2IP</i> | miR-4643              | 1 |
| <i>circSSX2IP</i> | miR-4645-3p           | 3 |
| <i>circSSX2IP</i> | miR-4646-3p           | 2 |
| <i>circSSX2IP</i> | miR-4648              | 2 |
| <i>circSSX2IP</i> | miR-4649-3p           | 1 |
| <i>circSSX2IP</i> | miR-4654/4769-5p      | 2 |
| <i>circSSX2IP</i> | miR-4659a-3p/4659b-3p | 5 |
| <i>circSSX2IP</i> | miR-466               | 1 |
| <i>circSSX2IP</i> | miR-4660              | 6 |
| <i>circSSX2IP</i> | miR-4662a-3p          | 4 |
| <i>circSSX2IP</i> | miR-4663              | 1 |
| <i>circSSX2IP</i> | miR-4666b             | 1 |
| <i>circSSX2IP</i> | miR-4668-5p           | 2 |
| <i>circSSX2IP</i> | miR-4671-3p           | 1 |

|                   |                     |   |
|-------------------|---------------------|---|
| <i>circSSX2IP</i> | miR-4672            | 1 |
| <i>circSSX2IP</i> | miR-4674            | 2 |
| <i>circSSX2IP</i> | miR-4677-3p         | 4 |
| <i>circSSX2IP</i> | miR-4677-5p         | 2 |
| <i>circSSX2IP</i> | miR-4678            | 2 |
| <i>circSSX2IP</i> | miR-4679            | 4 |
| <i>circSSX2IP</i> | miR-4680-5p         | 1 |
| <i>circSSX2IP</i> | miR-4683            | 3 |
| <i>circSSX2IP</i> | miR-4685-5p/6837-5p | 1 |
| <i>circSSX2IP</i> | miR-4688/6743-5p    | 1 |
| <i>circSSX2IP</i> | miR-4689/6858-5p    | 1 |
| <i>circSSX2IP</i> | miR-4691-3p         | 1 |
| <i>circSSX2IP</i> | miR-4691-5p/6792-3p | 1 |
| <i>circSSX2IP</i> | miR-4693-3p         | 5 |
| <i>circSSX2IP</i> | miR-4694-3p         | 1 |
| <i>circSSX2IP</i> | miR-4694-5p         | 1 |
| <i>circSSX2IP</i> | miR-4695-5p         | 2 |
| <i>circSSX2IP</i> | miR-4698            | 2 |
| <i>circSSX2IP</i> | miR-4699-3p         | 1 |
| <i>circSSX2IP</i> | miR-4699-5p         | 7 |
| <i>circSSX2IP</i> | miR-4700-3p         | 4 |
| <i>circSSX2IP</i> | miR-4708-5p         | 2 |
| <i>circSSX2IP</i> | miR-4709-3p         | 8 |
| <i>circSSX2IP</i> | miR-4709-5p         | 1 |
| <i>circSSX2IP</i> | miR-4710            | 1 |
| <i>circSSX2IP</i> | miR-4711-5p         | 4 |
| <i>circSSX2IP</i> | miR-4712-3p         | 3 |
| <i>circSSX2IP</i> | miR-4713-5p         | 2 |
| <i>circSSX2IP</i> | miR-4714-3p         | 1 |
| <i>circSSX2IP</i> | miR-4716-5p         | 1 |
| <i>circSSX2IP</i> | miR-4718            | 2 |
| <i>circSSX2IP</i> | miR-4724-3p         | 2 |
| <i>circSSX2IP</i> | miR-4724-5p         | 5 |
| <i>circSSX2IP</i> | miR-4726-3p         | 1 |
| <i>circSSX2IP</i> | miR-4729            | 1 |
| <i>circSSX2IP</i> | miR-4731-3p/4801    | 1 |
| <i>circSSX2IP</i> | miR-4731-5p         | 2 |
| <i>circSSX2IP</i> | miR-4732-3p         | 1 |

|                   |                     |   |
|-------------------|---------------------|---|
| <i>circSSX2IP</i> | miR-4738-3p         | 3 |
| <i>circSSX2IP</i> | miR-4739            | 2 |
| <i>circSSX2IP</i> | miR-4740-5p         | 2 |
| <i>circSSX2IP</i> | miR-4744            | 4 |
| <i>circSSX2IP</i> | miR-4747-5p/5196-5p | 2 |
| <i>circSSX2IP</i> | miR-4749-3p         | 1 |
| <i>circSSX2IP</i> | miR-4750-3p         | 1 |
| <i>circSSX2IP</i> | miR-4751            | 2 |
| <i>circSSX2IP</i> | miR-4752            | 3 |
| <i>circSSX2IP</i> | miR-4753-3p         | 4 |
| <i>circSSX2IP</i> | miR-4755-3p         | 2 |
| <i>circSSX2IP</i> | miR-4756-3p         | 4 |
| <i>circSSX2IP</i> | miR-4757-5p/6744-3p | 1 |
| <i>circSSX2IP</i> | miR-4759            | 2 |
| <i>circSSX2IP</i> | miR-4760-3p         | 2 |
| <i>circSSX2IP</i> | miR-4760-5p/8061    | 1 |
| <i>circSSX2IP</i> | miR-4761-5p         | 1 |
| <i>circSSX2IP</i> | miR-4762-5p         | 2 |
| <i>circSSX2IP</i> | miR-4764-3p         | 1 |
| <i>circSSX2IP</i> | miR-4765            | 2 |
| <i>circSSX2IP</i> | miR-4766-3p         | 1 |
| <i>circSSX2IP</i> | miR-4766-5p         | 2 |
| <i>circSSX2IP</i> | miR-4768-3p         | 3 |
| <i>circSSX2IP</i> | miR-4768-5p/6833-3p | 4 |
| <i>circSSX2IP</i> | miR-4772-5p         | 1 |
| <i>circSSX2IP</i> | miR-4773            | 2 |
| <i>circSSX2IP</i> | miR-4774-5p         | 2 |
| <i>circSSX2IP</i> | miR-4775            | 1 |
| <i>circSSX2IP</i> | miR-4776-5p         | 2 |
| <i>circSSX2IP</i> | miR-4777-3p         | 3 |
| <i>circSSX2IP</i> | miR-4777-5p         | 3 |
| <i>circSSX2IP</i> | miR-4778-3p         | 2 |
| <i>circSSX2IP</i> | miR-4779            | 2 |
| <i>circSSX2IP</i> | miR-4781-3p         | 2 |
| <i>circSSX2IP</i> | miR-4786-3p         | 4 |
| <i>circSSX2IP</i> | miR-4789-3p         | 1 |
| <i>circSSX2IP</i> | miR-4790-3p         | 2 |
| <i>circSSX2IP</i> | miR-4792            | 1 |

|                   |                     |   |
|-------------------|---------------------|---|
| <i>circSSX2IP</i> | miR-4793-3p         | 2 |
| <i>circSSX2IP</i> | miR-4795-5p         | 2 |
| <i>circSSX2IP</i> | miR-4797-3p         | 2 |
| <i>circSSX2IP</i> | miR-4797-5p         | 4 |
| <i>circSSX2IP</i> | miR-4798-3p         | 2 |
| <i>circSSX2IP</i> | miR-485-5p          | 2 |
| <i>circSSX2IP</i> | miR-487a-5p/487b-5p | 1 |
| <i>circSSX2IP</i> | miR-488-3p          | 1 |
| <i>circSSX2IP</i> | miR-489-3p          | 1 |
| <i>circSSX2IP</i> | miR-492             | 2 |
| <i>circSSX2IP</i> | miR-493-3p          | 3 |
| <i>circSSX2IP</i> | miR-493-5p          | 1 |
| <i>circSSX2IP</i> | miR-494-3p          | 4 |
| <i>circSSX2IP</i> | miR-495-3p          | 6 |
| <i>circSSX2IP</i> | miR-495-5p          | 1 |
| <i>circSSX2IP</i> | miR-496.1           | 4 |
| <i>circSSX2IP</i> | miR-498             | 1 |
| <i>circSSX2IP</i> | miR-4999-5p         | 2 |
| <i>circSSX2IP</i> | miR-499a-3p/499b-3p | 1 |
| <i>circSSX2IP</i> | miR-499b-5p         | 1 |
| <i>circSSX2IP</i> | miR-5002-5p         | 1 |
| <i>circSSX2IP</i> | miR-5003-3p         | 3 |
| <i>circSSX2IP</i> | miR-5004-3p         | 3 |
| <i>circSSX2IP</i> | miR-5004-5p         | 2 |
| <i>circSSX2IP</i> | miR-5007-3p         | 1 |
| <i>circSSX2IP</i> | miR-5007-5p         | 1 |
| <i>circSSX2IP</i> | miR-500a-5p         | 2 |
| <i>circSSX2IP</i> | miR-5010-3p         | 2 |
| <i>circSSX2IP</i> | miR-5011-3p         | 1 |
| <i>circSSX2IP</i> | miR-5011-5p         | 2 |
| <i>circSSX2IP</i> | miR-503-5p          | 8 |
| <i>circSSX2IP</i> | miR-504-3p          | 6 |
| <i>circSSX2IP</i> | miR-505-3p.2        | 3 |
| <i>circSSX2IP</i> | miR-505-5p          | 2 |
| <i>circSSX2IP</i> | miR-506-5p          | 1 |
| <i>circSSX2IP</i> | miR-507/557         | 2 |
| <i>circSSX2IP</i> | miR-5089-3p         | 2 |
| <i>circSSX2IP</i> | miR-5089-5p         | 3 |

|                   |                                         |    |
|-------------------|-----------------------------------------|----|
| <i>circSSX2IP</i> | miR-509-3-5p/509-5p/4418                | 2  |
| <i>circSSX2IP</i> | miR-509-3p                              | 6  |
| <i>circSSX2IP</i> | miR-5093                                | 4  |
| <i>circSSX2IP</i> | miR-5095/7151-3p                        | 3  |
| <i>circSSX2IP</i> | miR-510-3p                              | 2  |
| <i>circSSX2IP</i> | miR-511-5p                              | 1  |
| <i>circSSX2IP</i> | miR-512-3p                              | 2  |
| <i>circSSX2IP</i> | miR-512-5p                              | 2  |
| <i>circSSX2IP</i> | miR-513a-5p                             | 3  |
| <i>circSSX2IP</i> | miR-513c-5p/514b-5p                     | 4  |
| <i>circSSX2IP</i> | miR-514a-3p                             | 1  |
| <i>circSSX2IP</i> | miR-515-5p/519e-5p                      | 2  |
| <i>circSSX2IP</i> | miR-517-5p                              | 2  |
| <i>circSSX2IP</i> | miR-5186                                | 4  |
| <i>circSSX2IP</i> | miR-518a-5p/527                         | 1  |
| <i>circSSX2IP</i> | miR-518d-5p/519-5p                      | 3  |
| <i>circSSX2IP</i> | miR-519-3p                              | 3  |
| <i>circSSX2IP</i> | miR-5192                                | 5  |
| <i>circSSX2IP</i> | miR-5193                                | 1  |
| <i>circSSX2IP</i> | miR-5197-3p                             | 10 |
| <i>circSSX2IP</i> | miR-5197-5p                             | 1  |
| <i>circSSX2IP</i> | miR-520g-5p                             | 5  |
| <i>circSSX2IP</i> | miR-522-3p                              | 1  |
| <i>circSSX2IP</i> | miR-524-5p                              | 3  |
| <i>circSSX2IP</i> | miR-526b-5p                             | 3  |
| <i>circSSX2IP</i> | miR-532-3p                              | 1  |
| <i>circSSX2IP</i> | miR-532-5p                              | 2  |
| <i>circSSX2IP</i> | miR-539-3p                              | 1  |
| <i>circSSX2IP</i> | miR-539-5p                              | 6  |
| <i>circSSX2IP</i> | miR-542-3p                              | 3  |
| <i>circSSX2IP</i> | miR-543                                 | 2  |
| <i>circSSX2IP</i> | miR-544a                                | 2  |
| <i>circSSX2IP</i> | miR-544b                                | 1  |
| <i>circSSX2IP</i> | miR-545-3p                              | 3  |
| <i>circSSX2IP</i> | miR-545-5p                              | 1  |
| <i>circSSX2IP</i> | miR-548ac/548bb-3p/548d-3p/548h-3p/548z | 1  |
| <i>circSSX2IP</i> | miR-548ah-5p/3609                       | 1  |
| <i>circSSX2IP</i> | miR-548ai/548ag/548ba/570-5p            | 4  |



|                   |                                                                  |   |
|-------------------|------------------------------------------------------------------|---|
| <i>circSSX2IP</i> | miR-548aj-5p/548f-5p/548g-5p/548x-5p                             | 3 |
| <i>circSSX2IP</i> | miR-548ao-3p                                                     | 1 |
| <i>circSSX2IP</i> | miR-548aq-3p/548am-3p/548aj-3p/548ah-3p/548ae-3p/548j-3p/548x-3p | 1 |
| <i>circSSX2IP</i> | miR-548at-5p                                                     | 1 |
| <i>circSSX2IP</i> | miR-548av-3p                                                     | 6 |
| <i>circSSX2IP</i> | miR-548av-5p/548k/8054                                           | 1 |
| <i>circSSX2IP</i> | miR-548aw                                                        | 1 |
| <i>circSSX2IP</i> | miR-548ay-5p/548au-5p/548as-5p/548ar-5p/548aq-5p/548ap-5p/548am- | 1 |
| <i>circSSX2IP</i> | miR-548az-3p/548ar-3p/548a-3p/548e-3p/548f-3p                    | 1 |
| <i>circSSX2IP</i> | miR-548az-5p/548t-5p                                             | 2 |
| <i>circSSX2IP</i> | miR-548b-3p                                                      | 4 |
| <i>circSSX2IP</i> | miR-548c-3p                                                      | 4 |
| <i>circSSX2IP</i> | miR-548e-5p                                                      | 2 |
| <i>circSSX2IP</i> | miR-548g-3p                                                      | 2 |
| <i>circSSX2IP</i> | miR-548l                                                         | 1 |
| <i>circSSX2IP</i> | miR-548m                                                         | 3 |
| <i>circSSX2IP</i> | miR-548n                                                         | 2 |
| <i>circSSX2IP</i> | miR-548p                                                         | 2 |
| <i>circSSX2IP</i> | miR-550a-3-5p/550a-5p/1271-3p                                    | 3 |
| <i>circSSX2IP</i> | miR-551b-5p                                                      | 1 |
| <i>circSSX2IP</i> | miR-552-3p                                                       | 1 |
| <i>circSSX2IP</i> | miR-552-5p                                                       | 2 |
| <i>circSSX2IP</i> | miR-556-3p                                                       | 2 |
| <i>circSSX2IP</i> | miR-556-5p                                                       | 2 |
| <i>circSSX2IP</i> | miR-5571-5p                                                      | 2 |
| <i>circSSX2IP</i> | miR-558                                                          | 6 |
| <i>circSSX2IP</i> | miR-5581-3p                                                      | 1 |
| <i>circSSX2IP</i> | miR-5582-3p                                                      | 8 |
| <i>circSSX2IP</i> | miR-5584-5p                                                      | 2 |
| <i>circSSX2IP</i> | miR-5585-3p                                                      | 3 |
| <i>circSSX2IP</i> | miR-5586-3p                                                      | 2 |
| <i>circSSX2IP</i> | miR-5586-5p                                                      | 2 |
| <i>circSSX2IP</i> | miR-5589-5p                                                      | 2 |
| <i>circSSX2IP</i> | miR-561-3p                                                       | 1 |
| <i>circSSX2IP</i> | miR-567                                                          | 2 |
| <i>circSSX2IP</i> | miR-568                                                          | 2 |
| <i>circSSX2IP</i> | miR-5680                                                         | 2 |
| <i>circSSX2IP</i> | miR-5683                                                         | 3 |

|                   |                  |    |
|-------------------|------------------|----|
| <i>circSSX2IP</i> | miR-5684         | 1  |
| <i>circSSX2IP</i> | miR-5689         | 1  |
| <i>circSSX2IP</i> | miR-5690         | 4  |
| <i>circSSX2IP</i> | miR-5692a        | 1  |
| <i>circSSX2IP</i> | miR-5692bc       | 5  |
| <i>circSSX2IP</i> | miR-5693         | 2  |
| <i>circSSX2IP</i> | miR-5696         | 1  |
| <i>circSSX2IP</i> | miR-570-3p       | 3  |
| <i>circSSX2IP</i> | miR-5700         | 2  |
| <i>circSSX2IP</i> | miR-571          | 1  |
| <i>circSSX2IP</i> | miR-575/4676-5p  | 2  |
| <i>circSSX2IP</i> | miR-576-3p       | 3  |
| <i>circSSX2IP</i> | miR-576-5p       | 1  |
| <i>circSSX2IP</i> | miR-577          | 3  |
| <i>circSSX2IP</i> | miR-579-3p       | 1  |
| <i>circSSX2IP</i> | miR-580-3p       | 4  |
| <i>circSSX2IP</i> | miR-580-5p       | 8  |
| <i>circSSX2IP</i> | miR-581          | 2  |
| <i>circSSX2IP</i> | miR-583          | 14 |
| <i>circSSX2IP</i> | miR-586          | 1  |
| <i>circSSX2IP</i> | miR-589-3p       | 2  |
| <i>circSSX2IP</i> | miR-589-5p       | 1  |
| <i>circSSX2IP</i> | miR-590-3p       | 5  |
| <i>circSSX2IP</i> | miR-591          | 4  |
| <i>circSSX2IP</i> | miR-592          | 1  |
| <i>circSSX2IP</i> | miR-597-3p       | 2  |
| <i>circSSX2IP</i> | miR-599          | 1  |
| <i>circSSX2IP</i> | miR-600          | 4  |
| <i>circSSX2IP</i> | miR-605-5p       | 2  |
| <i>circSSX2IP</i> | miR-607          | 1  |
| <i>circSSX2IP</i> | miR-6072/6891-3p | 1  |
| <i>circSSX2IP</i> | miR-6073         | 1  |
| <i>circSSX2IP</i> | miR-6077         | 4  |
| <i>circSSX2IP</i> | miR-6078         | 2  |
| <i>circSSX2IP</i> | miR-6079         | 3  |
| <i>circSSX2IP</i> | miR-6081         | 1  |
| <i>circSSX2IP</i> | miR-6083         | 5  |
| <i>circSSX2IP</i> | miR-6085/6813-5p | 1  |

|                   |                    |   |
|-------------------|--------------------|---|
| <i>circSSX2IP</i> | miR-610            | 2 |
| <i>circSSX2IP</i> | miR-6124           | 6 |
| <i>circSSX2IP</i> | miR-6125           | 2 |
| <i>circSSX2IP</i> | miR-6126           | 1 |
| <i>circSSX2IP</i> | miR-6128           | 3 |
| <i>circSSX2IP</i> | miR-6134           | 1 |
| <i>circSSX2IP</i> | miR-617            | 1 |
| <i>circSSX2IP</i> | miR-618            | 2 |
| <i>circSSX2IP</i> | miR-619-3p         | 1 |
| <i>circSSX2IP</i> | miR-619-5p/6506-5p | 4 |
| <i>circSSX2IP</i> | miR-623            | 2 |
| <i>circSSX2IP</i> | miR-625-3p         | 1 |
| <i>circSSX2IP</i> | miR-628-5p         | 2 |
| <i>circSSX2IP</i> | miR-629-3p         | 3 |
| <i>circSSX2IP</i> | miR-633            | 2 |
| <i>circSSX2IP</i> | miR-636            | 2 |
| <i>circSSX2IP</i> | miR-642-3p         | 2 |
| <i>circSSX2IP</i> | miR-644a           | 1 |
| <i>circSSX2IP</i> | miR-646            | 8 |
| <i>circSSX2IP</i> | miR-648            | 1 |
| <i>circSSX2IP</i> | miR-6499-3p        | 1 |
| <i>circSSX2IP</i> | miR-6501-3p        | 3 |
| <i>circSSX2IP</i> | miR-6501-5p        | 1 |
| <i>circSSX2IP</i> | miR-6502-3p        | 1 |
| <i>circSSX2IP</i> | miR-6504-3p        | 1 |
| <i>circSSX2IP</i> | miR-6505-3p        | 1 |
| <i>circSSX2IP</i> | miR-6507-3p        | 3 |
| <i>circSSX2IP</i> | miR-6507-5p        | 8 |
| <i>circSSX2IP</i> | miR-6509-3p        | 1 |
| <i>circSSX2IP</i> | miR-651-3p         | 6 |
| <i>circSSX2IP</i> | miR-6512-5p        | 1 |
| <i>circSSX2IP</i> | miR-6513-3p        | 3 |
| <i>circSSX2IP</i> | miR-6513-5p        | 1 |
| <i>circSSX2IP</i> | miR-6515-3p        | 2 |
| <i>circSSX2IP</i> | miR-6515-5p        | 2 |
| <i>circSSX2IP</i> | miR-6516-3p        | 4 |
| <i>circSSX2IP</i> | miR-653-5p         | 2 |
| <i>circSSX2IP</i> | miR-654-3p         | 2 |

|                   |                     |    |
|-------------------|---------------------|----|
| <i>circSSX2IP</i> | miR-659-3p          | 2  |
| <i>circSSX2IP</i> | miR-659-5p          | 2  |
| <i>circSSX2IP</i> | miR-660-3p          | 1  |
| <i>circSSX2IP</i> | miR-661             | 2  |
| <i>circSSX2IP</i> | miR-664a-5p/4794    | 2  |
| <i>circSSX2IP</i> | miR-665             | 2  |
| <i>circSSX2IP</i> | miR-668-3p          | 1  |
| <i>circSSX2IP</i> | miR-670-3p          | 2  |
| <i>circSSX2IP</i> | miR-6715b-3p        | 1  |
| <i>circSSX2IP</i> | miR-6719-3p         | 1  |
| <i>circSSX2IP</i> | miR-6720-5p         | 1  |
| <i>circSSX2IP</i> | miR-6728-5p         | 3  |
| <i>circSSX2IP</i> | miR-6730-3p         | 1  |
| <i>circSSX2IP</i> | miR-6731-3p         | 2  |
| <i>circSSX2IP</i> | miR-6731-5p/8085    | 6  |
| <i>circSSX2IP</i> | miR-6733-3p         | 2  |
| <i>circSSX2IP</i> | miR-6736-3p         | 2  |
| <i>circSSX2IP</i> | miR-6738-3p         | 2  |
| <i>circSSX2IP</i> | miR-6740-3p         | 1  |
| <i>circSSX2IP</i> | miR-6742-3p         | 2  |
| <i>circSSX2IP</i> | miR-6743-3p         | 2  |
| <i>circSSX2IP</i> | miR-6744-5p         | 2  |
| <i>circSSX2IP</i> | miR-6746-3p         | 3  |
| <i>circSSX2IP</i> | miR-6746-5p         | 2  |
| <i>circSSX2IP</i> | miR-6749-3p         | 1  |
| <i>circSSX2IP</i> | miR-675-3p          | 2  |
| <i>circSSX2IP</i> | miR-6750-3p         | 1  |
| <i>circSSX2IP</i> | miR-6750-5p/6822-5p | 2  |
| <i>circSSX2IP</i> | miR-6753-3p/7107-3p | 1  |
| <i>circSSX2IP</i> | miR-6753-5p         | 1  |
| <i>circSSX2IP</i> | miR-6758-3p         | 1  |
| <i>circSSX2IP</i> | miR-6758-5p/6856-5p | 10 |
| <i>circSSX2IP</i> | miR-6759-3p         | 2  |
| <i>circSSX2IP</i> | miR-6759-5p         | 2  |
| <i>circSSX2IP</i> | miR-676-3p          | 1  |
| <i>circSSX2IP</i> | miR-676-5p          | 5  |
| <i>circSSX2IP</i> | miR-6760-5p         | 2  |
| <i>circSSX2IP</i> | miR-6761-5p         | 2  |

|                   |                     |   |
|-------------------|---------------------|---|
| <i>circSSX2IP</i> | miR-6765-3p         | 1 |
| <i>circSSX2IP</i> | miR-6768-5p         | 2 |
| <i>circSSX2IP</i> | miR-6769a-3p        | 1 |
| <i>circSSX2IP</i> | miR-6771-3p         | 1 |
| <i>circSSX2IP</i> | miR-6771-5p         | 2 |
| <i>circSSX2IP</i> | miR-6772-3p         | 1 |
| <i>circSSX2IP</i> | miR-6776-3p         | 1 |
| <i>circSSX2IP</i> | miR-6777-5p/6889-5p | 2 |
| <i>circSSX2IP</i> | miR-6778-3p         | 1 |
| <i>circSSX2IP</i> | miR-6780a-3p        | 2 |
| <i>circSSX2IP</i> | miR-6782-3p         | 5 |
| <i>circSSX2IP</i> | miR-6784-5p         | 2 |
| <i>circSSX2IP</i> | miR-6787-3p         | 2 |
| <i>circSSX2IP</i> | miR-6791-3p/6829-3p | 1 |
| <i>circSSX2IP</i> | miR-6792-5p         | 2 |
| <i>circSSX2IP</i> | miR-6793-3p         | 2 |
| <i>circSSX2IP</i> | miR-6796-5p         | 2 |
| <i>circSSX2IP</i> | miR-6798-5p         | 1 |
| <i>circSSX2IP</i> | miR-6801-3p/6810-3p | 1 |
| <i>circSSX2IP</i> | miR-6804-3p         | 1 |
| <i>circSSX2IP</i> | miR-6808-3p         | 1 |
| <i>circSSX2IP</i> | miR-6809-3p         | 4 |
| <i>circSSX2IP</i> | miR-6813-3p         | 2 |
| <i>circSSX2IP</i> | miR-6814-5p         | 1 |
| <i>circSSX2IP</i> | miR-6815-3p         | 2 |
| <i>circSSX2IP</i> | miR-6815-5p/6865-5p | 1 |
| <i>circSSX2IP</i> | miR-6818-3p         | 2 |
| <i>circSSX2IP</i> | miR-6818-5p         | 1 |
| <i>circSSX2IP</i> | miR-6822-3p         | 2 |
| <i>circSSX2IP</i> | miR-6826-5p         | 1 |
| <i>circSSX2IP</i> | miR-6827-5p         | 2 |
| <i>circSSX2IP</i> | miR-6830-5p         | 1 |
| <i>circSSX2IP</i> | miR-6831-3p         | 3 |
| <i>circSSX2IP</i> | miR-6832-3p         | 2 |
| <i>circSSX2IP</i> | miR-6833-5p         | 3 |
| <i>circSSX2IP</i> | miR-6837-3p         | 3 |
| <i>circSSX2IP</i> | miR-6840-3p         | 1 |
| <i>circSSX2IP</i> | miR-6841-3p         | 1 |

|                   |             |   |
|-------------------|-------------|---|
| <i>circSSX2IP</i> | miR-6844    | 1 |
| <i>circSSX2IP</i> | miR-6849-3p | 1 |
| <i>circSSX2IP</i> | miR-6852-5p | 2 |
| <i>circSSX2IP</i> | miR-6854-5p | 2 |
| <i>circSSX2IP</i> | miR-6858-3p | 2 |
| <i>circSSX2IP</i> | miR-6861-3p | 2 |
| <i>circSSX2IP</i> | miR-6864-5p | 1 |
| <i>circSSX2IP</i> | miR-6867-3p | 2 |
| <i>circSSX2IP</i> | miR-6868-3p | 3 |
| <i>circSSX2IP</i> | miR-6870-3p | 1 |
| <i>circSSX2IP</i> | miR-6871-3p | 1 |
| <i>circSSX2IP</i> | miR-6871-5p | 2 |
| <i>circSSX2IP</i> | miR-6873-3p | 2 |
| <i>circSSX2IP</i> | miR-6873-5p | 2 |
| <i>circSSX2IP</i> | miR-6874-5p | 1 |
| <i>circSSX2IP</i> | miR-6875-3p | 5 |
| <i>circSSX2IP</i> | miR-6878-3p | 1 |
| <i>circSSX2IP</i> | miR-6878-5p | 6 |
| <i>circSSX2IP</i> | miR-6879-3p | 1 |
| <i>circSSX2IP</i> | miR-6881-3p | 2 |
| <i>circSSX2IP</i> | miR-6882-5p | 1 |
| <i>circSSX2IP</i> | miR-6884-3p | 3 |
| <i>circSSX2IP</i> | miR-6888-3p | 1 |
| <i>circSSX2IP</i> | miR-6888-5p | 1 |
| <i>circSSX2IP</i> | miR-6890-3p | 1 |
| <i>circSSX2IP</i> | miR-6894-5p | 2 |
| <i>circSSX2IP</i> | miR-7-3p    | 2 |
| <i>circSSX2IP</i> | miR-7-5p    | 4 |
| <i>circSSX2IP</i> | miR-708-3p  | 2 |
| <i>circSSX2IP</i> | miR-7111-3p | 2 |
| <i>circSSX2IP</i> | miR-7112-3p | 4 |
| <i>circSSX2IP</i> | miR-7113-5p | 1 |
| <i>circSSX2IP</i> | miR-7152-5p | 2 |
| <i>circSSX2IP</i> | miR-7153-3p | 1 |
| <i>circSSX2IP</i> | miR-7154-3p | 2 |
| <i>circSSX2IP</i> | miR-7154-5p | 1 |
| <i>circSSX2IP</i> | miR-7158-3p | 2 |
| <i>circSSX2IP</i> | miR-7159-3p | 4 |

|                   |              |    |
|-------------------|--------------|----|
| <i>circSSX2IP</i> | miR-7159-5p  | 3  |
| <i>circSSX2IP</i> | miR-7160-5p  | 1  |
| <i>circSSX2IP</i> | miR-7161-3p  | 1  |
| <i>circSSX2IP</i> | miR-7162-3p  | 1  |
| <i>circSSX2IP</i> | miR-758-3p   | 2  |
| <i>circSSX2IP</i> | miR-759      | 2  |
| <i>circSSX2IP</i> | miR-760      | 2  |
| <i>circSSX2IP</i> | miR-765      | 2  |
| <i>circSSX2IP</i> | miR-766-3p   | 2  |
| <i>circSSX2IP</i> | miR-766-5p   | 2  |
| <i>circSSX2IP</i> | miR-7843-3p  | 4  |
| <i>circSSX2IP</i> | miR-7844-5p  | 2  |
| <i>circSSX2IP</i> | miR-7846-3p  | 2  |
| <i>circSSX2IP</i> | miR-7847-3p  | 5  |
| <i>circSSX2IP</i> | miR-7851-3p  | 1  |
| <i>circSSX2IP</i> | miR-7852-3p  | 3  |
| <i>circSSX2IP</i> | miR-7854-3p  | 1  |
| <i>circSSX2IP</i> | miR-7855-5p  | 2  |
| <i>circSSX2IP</i> | miR-7856-5p  | 1  |
| <i>circSSX2IP</i> | miR-7977     | 1  |
| <i>circSSX2IP</i> | miR-802      | 1  |
| <i>circSSX2IP</i> | miR-8055     | 2  |
| <i>circSSX2IP</i> | miR-8057     | 3  |
| <i>circSSX2IP</i> | miR-8060     | 1  |
| <i>circSSX2IP</i> | miR-8062     | 2  |
| <i>circSSX2IP</i> | miR-8063     | 2  |
| <i>circSSX2IP</i> | miR-8066     | 4  |
| <i>circSSX2IP</i> | miR-8068     | 2  |
| <i>circSSX2IP</i> | miR-8075     | 2  |
| <i>circSSX2IP</i> | miR-8076     | 2  |
| <i>circSSX2IP</i> | miR-8077     | 1  |
| <i>circSSX2IP</i> | miR-8083     | 2  |
| <i>circSSX2IP</i> | miR-873-3p   | 4  |
| <i>circSSX2IP</i> | miR-873-5p.1 | 11 |
| <i>circSSX2IP</i> | miR-875-3p   | 4  |
| <i>circSSX2IP</i> | miR-875-5p   | 3  |
| <i>circSSX2IP</i> | miR-876-3p   | 1  |
| <i>circSSX2IP</i> | miR-876-5p   | 1  |

|                   |                       |   |
|-------------------|-----------------------|---|
| <i>circSSX2IP</i> | miR-877-3p            | 1 |
| <i>circSSX2IP</i> | miR-887-5p            | 1 |
| <i>circSSX2IP</i> | miR-888-3p            | 1 |
| <i>circSSX2IP</i> | miR-888-5p            | 2 |
| <i>circSSX2IP</i> | miR-889-3p            | 2 |
| <i>circSSX2IP</i> | miR-889-5p            | 1 |
| <i>circSSX2IP</i> | miR-892-5p            | 1 |
| <i>circSSX2IP</i> | miR-892a              | 2 |
| <i>circSSX2IP</i> | miR-892b              | 1 |
| <i>circSSX2IP</i> | miR-9-3p              | 1 |
| <i>circSSX2IP</i> | miR-9-5p              | 1 |
| <i>circSSX2IP</i> | miR-922               | 6 |
| <i>circSSX2IP</i> | miR-93-3p             | 2 |
| <i>circSSX2IP</i> | miR-934               | 1 |
| <i>circSSX2IP</i> | miR-935               | 1 |
| <i>circSSX2IP</i> | miR-936               | 1 |
| <i>circSSX2IP</i> | miR-939-3p            | 2 |
| <i>circSSX2IP</i> | miR-942-5p            | 4 |
| <i>circSSX2IP</i> | miR-943               | 2 |
| <i>circSSX2IP</i> | miR-944               | 4 |
| <i>circSSX2IP</i> | miR-9500              | 2 |
| <i>circSSX2IP</i> | miR-96-3p             | 2 |
| <i>circST18</i>   | let-7a-2-3p/let-7g-3p | 1 |
| <i>circST18</i>   | let-7c-3p             | 1 |
| <i>circST18</i>   | miR-10-5p             | 5 |
| <i>circST18</i>   | miR-100-3p            | 5 |
| <i>circST18</i>   | miR-101-5p            | 3 |
| <i>circST18</i>   | miR-1180-5p           | 2 |
| <i>circST18</i>   | miR-1184              | 4 |
| <i>circST18</i>   | miR-1205              | 4 |
| <i>circST18</i>   | miR-1207-5p/4763-3p   | 3 |
| <i>circST18</i>   | miR-1233-5p/6778-5p   | 2 |
| <i>circST18</i>   | miR-1236-5p           | 2 |
| <i>circST18</i>   | miR-1238-3p           | 5 |
| <i>circST18</i>   | miR-1245a/8079        | 2 |
| <i>circST18</i>   | miR-1245b-3p          | 2 |
| <i>circST18</i>   | miR-1251-5p           | 2 |
| <i>circST18</i>   | miR-1255a/1255b-5p    | 5 |



|                 |                     |    |
|-----------------|---------------------|----|
| <i>circST18</i> | miR-1256            | 2  |
| <i>circST18</i> | miR-1264            | 5  |
| <i>circST18</i> | miR-127-5p          | 3  |
| <i>circST18</i> | miR-1270            | 4  |
| <i>circST18</i> | miR-1272            | 3  |
| <i>circST18</i> | miR-1275/4665-5p    | 1  |
| <i>circST18</i> | miR-1276            | 5  |
| <i>circST18</i> | miR-1295b-5p/1912   | 3  |
| <i>circST18</i> | miR-1298-3p         | 2  |
| <i>circST18</i> | miR-1299            | 3  |
| <i>circST18</i> | miR-1305            | 4  |
| <i>circST18</i> | miR-1306-5p         | 3  |
| <i>circST18</i> | miR-1322            | 3  |
| <i>circST18</i> | miR-140-3p.1        | 9  |
| <i>circST18</i> | miR-146-5p          | 2  |
| <i>circST18</i> | miR-149-5p          | 4  |
| <i>circST18</i> | miR-153-5p          | 4  |
| <i>circST18</i> | miR-17-3p           | 4  |
| <i>circST18</i> | miR-185-3p          | 5  |
| <i>circST18</i> | miR-185-5p          | 3  |
| <i>circST18</i> | miR-190-5p          | 1  |
| <i>circST18</i> | miR-1909-3p/6722-3p | 3  |
| <i>circST18</i> | miR-1915-5p         | 3  |
| <i>circST18</i> | miR-197-3p          | 3  |
| <i>circST18</i> | miR-1976            | 5  |
| <i>circST18</i> | miR-203b-3p         | 4  |
| <i>circST18</i> | miR-205-3p          | 3  |
| <i>circST18</i> | miR-21-5p/590-5p    | 3  |
| <i>circST18</i> | miR-211-3p          | 7  |
| <i>circST18</i> | miR-2115-5p         | 2  |
| <i>circST18</i> | miR-215-3p          | 2  |
| <i>circST18</i> | miR-219b-5p         | 4  |
| <i>circST18</i> | miR-221-5p/8073     | 3  |
| <i>circST18</i> | miR-2278            | 3  |
| <i>circST18</i> | miR-23-3p           | 3  |
| <i>circST18</i> | miR-2355-5p         | 4  |
| <i>circST18</i> | miR-2392            | 10 |
| <i>circST18</i> | miR-302a-5p         | 2  |

|                 |                           |   |
|-----------------|---------------------------|---|
| <i>circST18</i> | miR-3064-5p               | 2 |
| <i>circST18</i> | miR-31-5p                 | 2 |
| <i>circST18</i> | miR-3125/3916/6859-5p     | 6 |
| <i>circST18</i> | miR-3126-3p               | 2 |
| <i>circST18</i> | miR-3128                  | 2 |
| <i>circST18</i> | miR-3129-3p/5583-5p       | 2 |
| <i>circST18</i> | miR-3130-5p/4482-5p       | 3 |
| <i>circST18</i> | miR-3150b-3p              | 5 |
| <i>circST18</i> | miR-3158-3p               | 3 |
| <i>circST18</i> | miR-3158-5p               | 4 |
| <i>circST18</i> | miR-3160-3p               | 2 |
| <i>circST18</i> | miR-3183/4723-3p/6769b-3p | 7 |
| <i>circST18</i> | miR-3184-3p               | 5 |
| <i>circST18</i> | miR-3185                  | 9 |
| <i>circST18</i> | miR-3193                  | 3 |
| <i>circST18</i> | miR-330-3p                | 4 |
| <i>circST18</i> | miR-330-3p.2              | 4 |
| <i>circST18</i> | miR-345-5p                | 2 |
| <i>circST18</i> | miR-346                   | 4 |
| <i>circST18</i> | miR-3613-3p               | 3 |
| <i>circST18</i> | miR-3614-3p               | 3 |
| <i>circST18</i> | miR-3652/4430             | 5 |
| <i>circST18</i> | miR-3653-5p               | 5 |
| <i>circST18</i> | miR-3660/4526             | 3 |
| <i>circST18</i> | miR-3663-3p               | 2 |
| <i>circST18</i> | miR-3665                  | 1 |
| <i>circST18</i> | miR-3684                  | 1 |
| <i>circST18</i> | miR-3692-3p               | 2 |
| <i>circST18</i> | miR-3692-5p               | 5 |
| <i>circST18</i> | miR-371-5p                | 3 |
| <i>circST18</i> | miR-371b-5p/373-5p/616-5p | 3 |
| <i>circST18</i> | miR-372-5p                | 3 |
| <i>circST18</i> | miR-374a-3p               | 3 |
| <i>circST18</i> | miR-375                   | 3 |
| <i>circST18</i> | miR-376-3p                | 2 |
| <i>circST18</i> | miR-378j/6839-5p          | 6 |
| <i>circST18</i> | miR-3909                  | 3 |
| <i>circST18</i> | miR-3913-3p               | 3 |

|                 |                                              |    |
|-----------------|----------------------------------------------|----|
| <i>circST18</i> | miR-3914                                     | 5  |
| <i>circST18</i> | miR-3918                                     | 3  |
| <i>circST18</i> | miR-3942-3p                                  | 4  |
| <i>circST18</i> | miR-3973                                     | 4  |
| <i>circST18</i> | miR-3976                                     | 2  |
| <i>circST18</i> | miR-4267                                     | 3  |
| <i>circST18</i> | miR-4282                                     | 6  |
| <i>circST18</i> | miR-4292/6791-5p                             | 5  |
| <i>circST18</i> | miR-4308                                     | 5  |
| <i>circST18</i> | miR-4311                                     | 5  |
| <i>circST18</i> | miR-4312                                     | 2  |
| <i>circST18</i> | miR-432-3p                                   | 10 |
| <i>circST18</i> | miR-433-3p                                   | 5  |
| <i>circST18</i> | miR-4330                                     | 2  |
| <i>circST18</i> | miR-4422                                     | 4  |
| <i>circST18</i> | miR-4423-3p                                  | 1  |
| <i>circST18</i> | miR-4427                                     | 2  |
| <i>circST18</i> | miR-4434/4516/5703                           | 3  |
| <i>circST18</i> | miR-4436b-3p/4632-5p/6735-5p/6879-5p/7843-5p | 3  |
| <i>circST18</i> | miR-4446-3p                                  | 3  |
| <i>circST18</i> | miR-4455                                     | 2  |
| <i>circST18</i> | miR-4457                                     | 6  |
| <i>circST18</i> | miR-4464/4748                                | 3  |
| <i>circST18</i> | miR-4480                                     | 5  |
| <i>circST18</i> | miR-4487                                     | 2  |
| <i>circST18</i> | miR-4505/5787                                | 5  |
| <i>circST18</i> | miR-4511                                     | 3  |
| <i>circST18</i> | miR-4531                                     | 4  |
| <i>circST18</i> | miR-4648                                     | 2  |
| <i>circST18</i> | miR-4654/4769-5p                             | 2  |
| <i>circST18</i> | miR-4656                                     | 3  |
| <i>circST18</i> | miR-4667-5p/4700-5p/8089                     | 4  |
| <i>circST18</i> | miR-4675/4741                                | 3  |
| <i>circST18</i> | miR-4680-3p                                  | 2  |
| <i>circST18</i> | miR-4680-5p                                  | 2  |
| <i>circST18</i> | miR-4684-5p                                  | 2  |
| <i>circST18</i> | miR-4687-3p                                  | 2  |
| <i>circST18</i> | miR-4693-3p                                  | 2  |

|                 |                             |   |
|-----------------|-----------------------------|---|
| <i>circST18</i> | miR-4695-5p                 | 4 |
| <i>circST18</i> | miR-4708-3p                 | 7 |
| <i>circST18</i> | miR-4709-3p                 | 6 |
| <i>circST18</i> | miR-4714-3p                 | 1 |
| <i>circST18</i> | miR-4720-5p/4799-3p/5588-5p | 2 |
| <i>circST18</i> | miR-4724-5p                 | 6 |
| <i>circST18</i> | miR-4725-5p                 | 4 |
| <i>circST18</i> | miR-4736                    | 3 |
| <i>circST18</i> | miR-4738-3p                 | 5 |
| <i>circST18</i> | miR-4747-5p/5196-5p         | 3 |
| <i>circST18</i> | miR-4761-3p                 | 3 |
| <i>circST18</i> | miR-4761-5p                 | 3 |
| <i>circST18</i> | miR-4762-3p                 | 7 |
| <i>circST18</i> | miR-4762-5p                 | 2 |
| <i>circST18</i> | miR-4764-5p                 | 7 |
| <i>circST18</i> | miR-4765                    | 2 |
| <i>circST18</i> | miR-4766-5p                 | 7 |
| <i>circST18</i> | miR-4768-5p/6833-3p         | 1 |
| <i>circST18</i> | miR-4773                    | 6 |
| <i>circST18</i> | miR-4775                    | 4 |
| <i>circST18</i> | miR-4779                    | 4 |
| <i>circST18</i> | miR-4782-5p/5706            | 3 |
| <i>circST18</i> | miR-4802-5p                 | 2 |
| <i>circST18</i> | miR-488-3p                  | 6 |
| <i>circST18</i> | miR-489-3p                  | 3 |
| <i>circST18</i> | miR-493-5p                  | 1 |
| <i>circST18</i> | miR-495-3p                  | 2 |
| <i>circST18</i> | miR-498                     | 1 |
| <i>circST18</i> | miR-5002-5p                 | 3 |
| <i>circST18</i> | miR-5004-3p                 | 1 |
| <i>circST18</i> | miR-501-3p/502-3p           | 5 |
| <i>circST18</i> | miR-504-5p.1                | 5 |
| <i>circST18</i> | miR-5088-5p                 | 3 |
| <i>circST18</i> | miR-5100                    | 2 |
| <i>circST18</i> | miR-513c-5p/514b-5p         | 4 |
| <i>circST18</i> | miR-516a-3p/516b-3p/7162-5p | 2 |
| <i>circST18</i> | miR-516b-5p                 | 3 |
| <i>circST18</i> | miR-517-5p                  | 2 |

|                 |                                                                  |   |
|-----------------|------------------------------------------------------------------|---|
| <i>circST18</i> | miR-518-3p                                                       | 1 |
| <i>circST18</i> | miR-5187-3p                                                      | 2 |
| <i>circST18</i> | miR-5192                                                         | 3 |
| <i>circST18</i> | miR-5193                                                         | 4 |
| <i>circST18</i> | miR-5197-3p                                                      | 5 |
| <i>circST18</i> | miR-520g-3p                                                      | 4 |
| <i>circST18</i> | miR-548ac/548bb-3p/548d-3p/548h-3p/548z                          |   |
| <i>circST18</i> | miR-548ap-3p/548aa/548t-3p                                       | 3 |
| <i>circST18</i> | miR-548aq-3p/548am-3p/548aj-3p/548ah-3p/548ae-3p/548j-3p/548x-3p |   |
| <i>circST18</i> | miR-548as-3p                                                     | 3 |
| <i>circST18</i> | miR-548av-5p/548k/8054                                           | 4 |
| <i>circST18</i> | miR-548ay-3p/548at-3p                                            | 3 |
| <i>circST18</i> | miR-548ay-5p/548au-5p/548as-5p/548ar-5p/548aq-5p/548ap-5p/548am- |   |
| <i>circST18</i> | miR-548b-3p                                                      | 3 |
| <i>circST18</i> | miR-548g-3p                                                      | 3 |
| <i>circST18</i> | miR-548l                                                         | 4 |
| <i>circST18</i> | miR-548m                                                         | 5 |
| <i>circST18</i> | miR-548u/7161-5p                                                 | 5 |
| <i>circST18</i> | miR-551b-5p                                                      | 6 |
| <i>circST18</i> | miR-555                                                          | 1 |
| <i>circST18</i> | miR-558                                                          | 2 |
| <i>circST18</i> | miR-5580-5p                                                      | 2 |
| <i>circST18</i> | miR-5585-3p                                                      | 1 |
| <i>circST18</i> | miR-5586-3p                                                      | 1 |
| <i>circST18</i> | miR-5586-5p                                                      | 3 |
| <i>circST18</i> | miR-5680                                                         | 5 |
| <i>circST18</i> | miR-5681a                                                        | 7 |
| <i>circST18</i> | miR-5683                                                         | 3 |
| <i>circST18</i> | miR-5687                                                         | 3 |
| <i>circST18</i> | miR-5692a                                                        | 4 |
| <i>circST18</i> | miR-5696                                                         | 4 |
| <i>circST18</i> | miR-5700                                                         | 4 |
| <i>circST18</i> | miR-579-3p                                                       | 4 |
| <i>circST18</i> | miR-583                                                          | 5 |
| <i>circST18</i> | miR-589-3p                                                       | 2 |
| <i>circST18</i> | miR-589-5p                                                       | 2 |
| <i>circST18</i> | miR-590-3p                                                       | 4 |
| <i>circST18</i> | miR-591                                                          | 2 |

|                 |                             |    |
|-----------------|-----------------------------|----|
| <i>circST18</i> | miR-597-5p                  | 5  |
| <i>circST18</i> | miR-601                     | 1  |
| <i>circST18</i> | miR-6071                    | 4  |
| <i>circST18</i> | miR-609                     | 2  |
| <i>circST18</i> | miR-6132/6836-5p            | 3  |
| <i>circST18</i> | miR-626/6876-3p             | 3  |
| <i>circST18</i> | miR-628-5p                  | 2  |
| <i>circST18</i> | miR-630                     | 1  |
| <i>circST18</i> | miR-637                     | 4  |
| <i>circST18</i> | miR-647                     | 5  |
| <i>circST18</i> | miR-6507-3p                 | 3  |
| <i>circST18</i> | miR-651-3p                  | 14 |
| <i>circST18</i> | miR-6511-5p                 | 4  |
| <i>circST18</i> | miR-6514-5p                 | 2  |
| <i>circST18</i> | miR-653-5p                  | 3  |
| <i>circST18</i> | miR-654-5p                  | 2  |
| <i>circST18</i> | miR-657                     | 1  |
| <i>circST18</i> | miR-660-3p                  | 4  |
| <i>circST18</i> | miR-664a-5p/4794            | 4  |
| <i>circST18</i> | miR-670-3p                  | 5  |
| <i>circST18</i> | miR-671-5p                  | 2  |
| <i>circST18</i> | miR-6719-3p                 | 3  |
| <i>circST18</i> | miR-6720-5p                 | 1  |
| <i>circST18</i> | miR-6730-3p                 | 3  |
| <i>circST18</i> | miR-6730-5p                 | 7  |
| <i>circST18</i> | miR-6744-5p                 | 5  |
| <i>circST18</i> | miR-6750-3p                 | 5  |
| <i>circST18</i> | miR-6751-5p/6803-5p         | 1  |
| <i>circST18</i> | miR-6752-5p/6842-5p/7110-5p | 1  |
| <i>circST18</i> | miR-6758-3p                 | 3  |
| <i>circST18</i> | miR-6758-5p/6856-5p         | 4  |
| <i>circST18</i> | miR-676-3p                  | 8  |
| <i>circST18</i> | miR-6769a-5p/6769b-5p       | 2  |
| <i>circST18</i> | miR-6772-5p                 | 2  |
| <i>circST18</i> | miR-6773-3p                 | 2  |
| <i>circST18</i> | miR-6780a-3p                | 8  |
| <i>circST18</i> | miR-6793-3p                 | 3  |
| <i>circST18</i> | miR-6796-3p                 | 7  |

|                 |                           |   |
|-----------------|---------------------------|---|
| <i>circST18</i> | miR-6800-5p               | 1 |
| <i>circST18</i> | miR-6802-5p               | 1 |
| <i>circST18</i> | miR-6809-3p               | 1 |
| <i>circST18</i> | miR-6809-5p               | 2 |
| <i>circST18</i> | miR-6815-5p/6865-5p       | 6 |
| <i>circST18</i> | miR-6823-5p               | 1 |
| <i>circST18</i> | miR-6827-5p               | 2 |
| <i>circST18</i> | miR-6828-3p               | 4 |
| <i>circST18</i> | miR-6828-5p               | 2 |
| <i>circST18</i> | miR-6829-5p               | 3 |
| <i>circST18</i> | miR-6834-3p               | 7 |
| <i>circST18</i> | miR-6835-5p               | 1 |
| <i>circST18</i> | miR-6841-3p               | 3 |
| <i>circST18</i> | miR-6842-3p               | 5 |
| <i>circST18</i> | miR-6854-5p               | 4 |
| <i>circST18</i> | miR-6866-5p               | 2 |
| <i>circST18</i> | miR-6867-5p               | 1 |
| <i>circST18</i> | miR-6868-5p               | 2 |
| <i>circST18</i> | miR-6879-3p               | 3 |
| <i>circST18</i> | miR-6881-3p               | 8 |
| <i>circST18</i> | miR-6881-5p               | 2 |
| <i>circST18</i> | miR-6882-5p               | 8 |
| <i>circST18</i> | miR-6884-3p               | 3 |
| <i>circST18</i> | miR-6888-5p               | 4 |
| <i>circST18</i> | miR-6894-5p               | 3 |
| <i>circST18</i> | miR-7106-3p               | 2 |
| <i>circST18</i> | miR-7109-3p               | 1 |
| <i>circST18</i> | miR-7109-5p               | 1 |
| <i>circST18</i> | miR-7111-3p               | 8 |
| <i>circST18</i> | miR-7150                  | 2 |
| <i>circST18</i> | miR-7154-3p               | 3 |
| <i>circST18</i> | miR-7154-5p               | 5 |
| <i>circST18</i> | miR-7155-5p               | 4 |
| <i>circST18</i> | miR-7158-3p               | 4 |
| <i>circST18</i> | miR-7158-5p               | 3 |
| <i>circST18</i> | miR-762/4492/4498/5001-5p | 3 |
| <i>circST18</i> | miR-765                   | 3 |
| <i>circST18</i> | miR-766-5p                | 3 |

|                 |                     |   |
|-----------------|---------------------|---|
| <i>circST18</i> | miR-7843-3p         | 3 |
| <i>circST18</i> | miR-7850-5p         | 5 |
| <i>circST18</i> | miR-7974            | 2 |
| <i>circST18</i> | miR-8057            | 3 |
| <i>circST18</i> | miR-8062            | 2 |
| <i>circST18</i> | miR-877-3p          | 3 |
| <i>circST18</i> | miR-877-5p          | 2 |
| <i>circST18</i> | miR-891b            | 3 |
| <i>circST18</i> | miR-92a-2-5p        | 2 |
| <i>circST18</i> | miR-93-3p           | 5 |
| <i>circST18</i> | miR-942-5p          | 1 |
| <i>circST18</i> | miR-944             | 2 |
| <i>circST18</i> | miR-99-3p           | 7 |
| <i>circST18</i> | let-7-5p/98-5p      | 2 |
| <i>circST18</i> | miR-101-3p.1        | 1 |
| <i>circST18</i> | miR-103-3p/107      | 4 |
| <i>circST18</i> | miR-103a-2-5p       | 2 |
| <i>circST18</i> | miR-103b            | 2 |
| <i>circST18</i> | miR-105-3p          | 4 |
| <i>circST18</i> | miR-105-5p          | 1 |
| <i>circST18</i> | miR-106a-3p         | 2 |
| <i>circST18</i> | miR-1178-3p         | 1 |
| <i>circST18</i> | miR-1179            | 3 |
| <i>circST18</i> | miR-1183            | 2 |
| <i>circST18</i> | miR-1185-5p         | 1 |
| <i>circST18</i> | miR-1193            | 1 |
| <i>circST18</i> | miR-1197            | 2 |
| <i>circST18</i> | miR-1199-5p/6751-3p | 2 |
| <i>circST18</i> | miR-1200            | 5 |
| <i>circST18</i> | miR-1202/3972       | 4 |
| <i>circST18</i> | miR-1207-3p         | 3 |
| <i>circST18</i> | miR-1208            | 1 |
| <i>circST18</i> | miR-122-5p          | 2 |
| <i>circST18</i> | miR-1224-3p         | 3 |
| <i>circST18</i> | miR-1224-5p         | 1 |
| <i>circST18</i> | miR-1225-3p         | 1 |
| <i>circST18</i> | miR-1226-3p         | 3 |
| <i>circST18</i> | miR-1227-3p         | 1 |



|                 |                          |    |
|-----------------|--------------------------|----|
| <i>circST18</i> | miR-1228-3p              | 2  |
| <i>circST18</i> | miR-1233-3p              | 1  |
| <i>circST18</i> | miR-1234-3p/7107-5p      | 1  |
| <i>circST18</i> | miR-1236-3p              | 4  |
| <i>circST18</i> | miR-1237-3p              | 2  |
| <i>circST18</i> | miR-124-5p               | 2  |
| <i>circST18</i> | miR-1243                 | 1  |
| <i>circST18</i> | miR-1245b-5p             | 3  |
| <i>circST18</i> | miR-1246                 | 4  |
| <i>circST18</i> | miR-1247-5p              | 1  |
| <i>circST18</i> | miR-1248                 | 2  |
| <i>circST18</i> | miR-1249-3p              | 1  |
| <i>circST18</i> | miR-125-5p               | 10 |
| <i>circST18</i> | miR-1250-3p              | 4  |
| <i>circST18</i> | miR-1251-3p              | 2  |
| <i>circST18</i> | miR-1252-3p              | 7  |
| <i>circST18</i> | miR-1252-5p              | 4  |
| <i>circST18</i> | miR-1253                 | 3  |
| <i>circST18</i> | miR-1254/3116            | 1  |
| <i>circST18</i> | miR-1255b-2-3p           | 1  |
| <i>circST18</i> | miR-125a-3p              | 2  |
| <i>circST18</i> | miR-125b-1-3p            | 1  |
| <i>circST18</i> | miR-125b-2-3p            | 1  |
| <i>circST18</i> | miR-1260a/1260b          | 4  |
| <i>circST18</i> | miR-1261                 | 1  |
| <i>circST18</i> | miR-1262/4701-3p/6736-5p | 1  |
| <i>circST18</i> | miR-1263                 | 1  |
| <i>circST18</i> | miR-1265                 | 2  |
| <i>circST18</i> | miR-1266-5p/4518         | 1  |
| <i>circST18</i> | miR-1267                 | 1  |
| <i>circST18</i> | miR-1269                 | 3  |
| <i>circST18</i> | miR-1273d                | 1  |
| <i>circST18</i> | miR-1273e                | 1  |
| <i>circST18</i> | miR-1273f                | 1  |
| <i>circST18</i> | miR-1273g-3p             | 2  |
| <i>circST18</i> | miR-1273h-3p             | 3  |
| <i>circST18</i> | miR-1277-5p              | 1  |
| <i>circST18</i> | miR-128-1-5p             | 2  |

|                 |                          |   |
|-----------------|--------------------------|---|
| <i>circST18</i> | miR-128-3p               | 3 |
| <i>circST18</i> | miR-1283                 | 3 |
| <i>circST18</i> | miR-1284                 | 1 |
| <i>circST18</i> | miR-1285-5p              | 3 |
| <i>circST18</i> | miR-1287-5p              | 5 |
| <i>circST18</i> | miR-1288-5p              | 6 |
| <i>circST18</i> | miR-129-3p               | 3 |
| <i>circST18</i> | miR-129-5p               | 2 |
| <i>circST18</i> | miR-1293/4483            | 1 |
| <i>circST18</i> | miR-1298-5p              | 2 |
| <i>circST18</i> | miR-130-3p/301-3p/454-3p | 4 |
| <i>circST18</i> | miR-1301-3p              | 3 |
| <i>circST18</i> | miR-1301-5p/6502-5p      | 3 |
| <i>circST18</i> | miR-1302/4298            | 2 |
| <i>circST18</i> | miR-1303                 | 1 |
| <i>circST18</i> | miR-1304-5p              | 1 |
| <i>circST18</i> | miR-1307-3p              | 1 |
| <i>circST18</i> | miR-130b-5p              | 2 |
| <i>circST18</i> | miR-132-3p/212-3p        | 1 |
| <i>circST18</i> | miR-1323                 | 2 |
| <i>circST18</i> | miR-1324                 | 1 |
| <i>circST18</i> | miR-133a-3p.2/133b       | 1 |
| <i>circST18</i> | miR-134-5p               | 1 |
| <i>circST18</i> | miR-1343-3p              | 5 |
| <i>circST18</i> | miR-135-5p               | 3 |
| <i>circST18</i> | miR-135a-3p              | 1 |
| <i>circST18</i> | miR-136-3p               | 3 |
| <i>circST18</i> | miR-138-2-3p             | 3 |
| <i>circST18</i> | miR-139-3p               | 1 |
| <i>circST18</i> | miR-140-3p.2             | 2 |
| <i>circST18</i> | miR-141-3p/200-3p        | 1 |
| <i>circST18</i> | miR-141-5p               | 3 |
| <i>circST18</i> | miR-142-3p.1             | 2 |
| <i>circST18</i> | miR-142-5p               | 1 |
| <i>circST18</i> | miR-143-3p               | 1 |
| <i>circST18</i> | miR-143-5p               | 2 |
| <i>circST18</i> | miR-144-3p               | 1 |
| <i>circST18</i> | miR-145-3p               | 4 |

|                 |                                      |   |
|-----------------|--------------------------------------|---|
| <i>circST18</i> | miR-145-5p                           | 9 |
| <i>circST18</i> | miR-1468-3p                          | 1 |
| <i>circST18</i> | miR-146a-3p                          | 1 |
| <i>circST18</i> | miR-146b-3p                          | 1 |
| <i>circST18</i> | miR-1470                             | 1 |
| <i>circST18</i> | miR-147b                             | 1 |
| <i>circST18</i> | miR-148-3p/152-3p                    | 1 |
| <i>circST18</i> | miR-148a-5p                          | 1 |
| <i>circST18</i> | miR-148b-5p/6874-3p                  | 1 |
| <i>circST18</i> | miR-15-5p/16-5p/195-5p/424-5p/497-5p | 3 |
| <i>circST18</i> | miR-150-3p                           | 1 |
| <i>circST18</i> | miR-150-5p                           | 3 |
| <i>circST18</i> | miR-152-5p                           | 1 |
| <i>circST18</i> | miR-153-3p                           | 1 |
| <i>circST18</i> | miR-154-3p/487-3p                    | 2 |
| <i>circST18</i> | miR-155-5p                           | 1 |
| <i>circST18</i> | miR-1587/3620-5p                     | 2 |
| <i>circST18</i> | miR-15a-3p                           | 1 |
| <i>circST18</i> | miR-15b-3p                           | 1 |
| <i>circST18</i> | miR-17-5p/20-5p/93-5p/106-5p/519-3p  | 2 |
| <i>circST18</i> | miR-18-5p                            | 5 |
| <i>circST18</i> | miR-181d-3p                          | 2 |
| <i>circST18</i> | miR-182-3p                           | 1 |
| <i>circST18</i> | miR-182-5p                           | 1 |
| <i>circST18</i> | miR-1825                             | 3 |
| <i>circST18</i> | miR-1827                             | 2 |
| <i>circST18</i> | miR-183-3p                           | 5 |
| <i>circST18</i> | miR-183-5p.1                         | 4 |
| <i>circST18</i> | miR-183-5p.2                         | 3 |
| <i>circST18</i> | miR-186-3p                           | 2 |
| <i>circST18</i> | miR-186-5p                           | 9 |
| <i>circST18</i> | miR-188-3p                           | 4 |
| <i>circST18</i> | miR-188-5p                           | 3 |
| <i>circST18</i> | miR-18b-3p                           | 1 |
| <i>circST18</i> | miR-19-3p                            | 5 |
| <i>circST18</i> | miR-19-5p                            | 2 |
| <i>circST18</i> | miR-1909-5p                          | 2 |
| <i>circST18</i> | miR-190a-3p                          | 1 |

|                 |                      |   |
|-----------------|----------------------|---|
| <i>circST18</i> | miR-1910-3p/6511a-5p | 3 |
| <i>circST18</i> | miR-1911-3p          | 5 |
| <i>circST18</i> | miR-1914-5p          | 1 |
| <i>circST18</i> | miR-1915-3p/6764-5p  | 3 |
| <i>circST18</i> | miR-192-3p           | 3 |
| <i>circST18</i> | miR-192-5p/215-5p    | 1 |
| <i>circST18</i> | miR-193a-5p          | 1 |
| <i>circST18</i> | miR-194-3p           | 2 |
| <i>circST18</i> | miR-196-5p           | 2 |
| <i>circST18</i> | miR-197-5p/3132      | 2 |
| <i>circST18</i> | miR-1972             | 3 |
| <i>circST18</i> | miR-1973             | 1 |
| <i>circST18</i> | miR-199-3p           | 2 |
| <i>circST18</i> | miR-199-5p           | 3 |
| <i>circST18</i> | miR-202-3p           | 1 |
| <i>circST18</i> | miR-202-5p           | 1 |
| <i>circST18</i> | miR-203a-3p.1        | 3 |
| <i>circST18</i> | miR-204-3p/4646-5p   | 3 |
| <i>circST18</i> | miR-204-5p/211-5p    | 2 |
| <i>circST18</i> | miR-205-5p           | 2 |
| <i>circST18</i> | miR-2052             | 2 |
| <i>circST18</i> | miR-2053             | 2 |
| <i>circST18</i> | miR-208-3p           | 4 |
| <i>circST18</i> | miR-20a-3p           | 2 |
| <i>circST18</i> | miR-21-3p/3591-3p    | 5 |
| <i>circST18</i> | miR-210-3p           | 1 |
| <i>circST18</i> | miR-2110             | 2 |
| <i>circST18</i> | miR-2113             | 2 |
| <i>circST18</i> | miR-2114-3p          | 2 |
| <i>circST18</i> | miR-2114-5p          | 3 |
| <i>circST18</i> | miR-2116-3p          | 3 |
| <i>circST18</i> | miR-2116-5p          | 3 |
| <i>circST18</i> | miR-212-5p           | 1 |
| <i>circST18</i> | miR-214-3p/3619-5p   | 3 |
| <i>circST18</i> | miR-217              | 3 |
| <i>circST18</i> | miR-218-1-3p         | 1 |
| <i>circST18</i> | miR-218-2-3p         | 1 |
| <i>circST18</i> | miR-218-5p           | 1 |

|                 |                                              |   |
|-----------------|----------------------------------------------|---|
| <i>circST18</i> | miR-22-3p                                    | 1 |
| <i>circST18</i> | miR-22-5p                                    | 3 |
| <i>circST18</i> | miR-223-5p                                   | 1 |
| <i>circST18</i> | miR-2276-3p                                  | 4 |
| <i>circST18</i> | miR-2276-5p                                  | 2 |
| <i>circST18</i> | miR-23-5p                                    | 2 |
| <i>circST18</i> | miR-2355-3p                                  | 6 |
| <i>circST18</i> | miR-24-3p                                    | 1 |
| <i>circST18</i> | miR-24-5p                                    | 1 |
| <i>circST18</i> | miR-2467-3p                                  | 3 |
| <i>circST18</i> | miR-25-3p/32-5p/92-3p/363-3p/367-3p          | 1 |
| <i>circST18</i> | miR-26-3p                                    | 1 |
| <i>circST18</i> | miR-26-5p                                    | 5 |
| <i>circST18</i> | miR-2681-3p                                  | 3 |
| <i>circST18</i> | miR-2682-3p/6781-3p                          | 1 |
| <i>circST18</i> | miR-26b-3p                                   | 2 |
| <i>circST18</i> | miR-27b-5p                                   | 3 |
| <i>circST18</i> | miR-28-5p/708-5p                             | 2 |
| <i>circST18</i> | miR-2861                                     | 1 |
| <i>circST18</i> | miR-29-3p                                    | 1 |
| <i>circST18</i> | miR-298                                      | 4 |
| <i>circST18</i> | miR-299-3p                                   | 5 |
| <i>circST18</i> | miR-29a-5p                                   | 2 |
| <i>circST18</i> | miR-30-3p                                    | 4 |
| <i>circST18</i> | miR-30-5p                                    | 1 |
| <i>circST18</i> | miR-301a-5p/301b-5p                          | 2 |
| <i>circST18</i> | miR-302-3p/372-3p/373-3p/520-3p              | 3 |
| <i>circST18</i> | miR-302b-5p/302d-5p                          | 2 |
| <i>circST18</i> | miR-302c-3p.2/520-3p                         | 1 |
| <i>circST18</i> | miR-302c-5p                                  | 1 |
| <i>circST18</i> | miR-302f                                     | 2 |
| <i>circST18</i> | miR-3064-3p                                  | 4 |
| <i>circST18</i> | miR-3065-5p                                  | 1 |
| <i>circST18</i> | miR-3074-3p                                  | 1 |
| <i>circST18</i> | miR-3074-5p                                  | 4 |
| <i>circST18</i> | miR-30b-3p/1273h-5p/3689-3p/6779-5p/6780a-5p |   |
| <i>circST18</i> | miR-30c-3p/6788-5p                           | 1 |
| <i>circST18</i> | miR-31-3p                                    | 1 |

|                 |                          |   |
|-----------------|--------------------------|---|
| <i>circST18</i> | miR-3117-5p              | 1 |
| <i>circST18</i> | miR-3120-3p              | 3 |
| <i>circST18</i> | miR-3121-3p              | 2 |
| <i>circST18</i> | miR-3121-5p              | 1 |
| <i>circST18</i> | miR-3123                 | 3 |
| <i>circST18</i> | miR-3124-3p              | 2 |
| <i>circST18</i> | miR-3126-5p              | 1 |
| <i>circST18</i> | miR-3127-3p/6756-3p      | 1 |
| <i>circST18</i> | miR-3130-3p              | 4 |
| <i>circST18</i> | miR-3133                 | 9 |
| <i>circST18</i> | miR-3134                 | 5 |
| <i>circST18</i> | miR-3135a                | 1 |
| <i>circST18</i> | miR-3135b                | 5 |
| <i>circST18</i> | miR-3136-3p/7155-3p      | 1 |
| <i>circST18</i> | miR-3136-5p/4439         | 2 |
| <i>circST18</i> | miR-3140-5p              | 7 |
| <i>circST18</i> | miR-3144-3p              | 1 |
| <i>circST18</i> | miR-3145-5p              | 2 |
| <i>circST18</i> | miR-3146                 | 1 |
| <i>circST18</i> | miR-3148                 | 4 |
| <i>circST18</i> | miR-3150a-3p             | 2 |
| <i>circST18</i> | miR-3151-3p              | 1 |
| <i>circST18</i> | miR-3152-3p              | 2 |
| <i>circST18</i> | miR-3153/6733-5p/6739-5p | 3 |
| <i>circST18</i> | miR-3154                 | 6 |
| <i>circST18</i> | miR-3156-3p              | 4 |
| <i>circST18</i> | miR-3156-5p              | 1 |
| <i>circST18</i> | miR-3157-3p              | 4 |
| <i>circST18</i> | miR-3157-5p              | 4 |
| <i>circST18</i> | miR-3159                 | 4 |
| <i>circST18</i> | miR-3160-5p              | 1 |
| <i>circST18</i> | miR-3161                 | 2 |
| <i>circST18</i> | miR-3162-3p              | 3 |
| <i>circST18</i> | miR-3163                 | 5 |
| <i>circST18</i> | miR-3164                 | 1 |
| <i>circST18</i> | miR-3165                 | 1 |
| <i>circST18</i> | miR-3166                 | 1 |
| <i>circST18</i> | miR-3168                 | 1 |

|                 |                           |   |
|-----------------|---------------------------|---|
| <i>circST18</i> | miR-3170/6855-5p          | 1 |
| <i>circST18</i> | miR-3171                  | 6 |
| <i>circST18</i> | miR-3173-3p/6891-5p       | 3 |
| <i>circST18</i> | miR-3173-5p               | 1 |
| <i>circST18</i> | miR-3174                  | 1 |
| <i>circST18</i> | miR-3176/3922-3p          | 1 |
| <i>circST18</i> | miR-3177-3p               | 1 |
| <i>circST18</i> | miR-3179                  | 1 |
| <i>circST18</i> | miR-3182                  | 4 |
| <i>circST18</i> | miR-3187-3p               | 3 |
| <i>circST18</i> | miR-3189-3p               | 1 |
| <i>circST18</i> | miR-3189-5p               | 1 |
| <i>circST18</i> | miR-3190-3p               | 5 |
| <i>circST18</i> | miR-3190-5p               | 1 |
| <i>circST18</i> | miR-3192-3p               | 3 |
| <i>circST18</i> | miR-3192-5p               | 3 |
| <i>circST18</i> | miR-3194-3p               | 2 |
| <i>circST18</i> | miR-3194-5p               | 1 |
| <i>circST18</i> | miR-3198/4309             | 1 |
| <i>circST18</i> | miR-32-3p                 | 2 |
| <i>circST18</i> | miR-3202                  | 4 |
| <i>circST18</i> | miR-320e                  | 2 |
| <i>circST18</i> | miR-323a-5p               | 4 |
| <i>circST18</i> | miR-323b-5p/410-5p/494-5p | 3 |
| <i>circST18</i> | miR-324-5p                | 1 |
| <i>circST18</i> | miR-326                   | 1 |
| <i>circST18</i> | miR-329-5p                | 1 |
| <i>circST18</i> | miR-331-3p                | 9 |
| <i>circST18</i> | miR-335-3p                | 2 |
| <i>circST18</i> | miR-335-5p                | 6 |
| <i>circST18</i> | miR-337-3p                | 2 |
| <i>circST18</i> | miR-33a-3p                | 2 |
| <i>circST18</i> | miR-33b-3p/515-3p/519e-3p | 1 |
| <i>circST18</i> | miR-34-5p/449-5p          | 2 |
| <i>circST18</i> | miR-340-5p                | 1 |
| <i>circST18</i> | miR-342-5p/4664-5p        | 1 |
| <i>circST18</i> | miR-345-3p                | 7 |
| <i>circST18</i> | miR-34a-3p                | 1 |

|                 |                    |   |
|-----------------|--------------------|---|
| <i>circST18</i> | miR-34b-3p         | 9 |
| <i>circST18</i> | miR-34b-5p/449c-5p | 3 |
| <i>circST18</i> | miR-34c-3p         | 9 |
| <i>circST18</i> | miR-3529-3p        | 1 |
| <i>circST18</i> | miR-3605-3p        | 1 |
| <i>circST18</i> | miR-3605-5p        | 1 |
| <i>circST18</i> | miR-3606-5p        | 2 |
| <i>circST18</i> | miR-3607-3p        | 1 |
| <i>circST18</i> | miR-3607-5p        | 2 |
| <i>circST18</i> | miR-361-3p         | 2 |
| <i>circST18</i> | miR-361-5p         | 2 |
| <i>circST18</i> | miR-3611           | 1 |
| <i>circST18</i> | miR-3612           | 1 |
| <i>circST18</i> | miR-3613-5p        | 1 |
| <i>circST18</i> | miR-3614-5p        | 1 |
| <i>circST18</i> | miR-3615           | 1 |
| <i>circST18</i> | miR-3616-3p        | 2 |
| <i>circST18</i> | miR-3617-3p        | 1 |
| <i>circST18</i> | miR-362-5p/500b-5p | 1 |
| <i>circST18</i> | miR-3620-3p        | 1 |
| <i>circST18</i> | miR-3621           | 1 |
| <i>circST18</i> | miR-3622a-5p       | 1 |
| <i>circST18</i> | miR-3622b-5p       | 1 |
| <i>circST18</i> | miR-363-5p/6745    | 1 |
| <i>circST18</i> | miR-3646           | 7 |
| <i>circST18</i> | miR-365-3p         | 1 |
| <i>circST18</i> | miR-3650           | 2 |
| <i>circST18</i> | miR-3654           | 1 |
| <i>circST18</i> | miR-3655           | 5 |
| <i>circST18</i> | miR-3656           | 1 |
| <i>circST18</i> | miR-3657           | 3 |
| <i>circST18</i> | miR-3662           | 8 |
| <i>circST18</i> | miR-3663-5p        | 2 |
| <i>circST18</i> | miR-3664-3p        | 1 |
| <i>circST18</i> | miR-3664-5p        | 1 |
| <i>circST18</i> | miR-3667-3p        | 1 |
| <i>circST18</i> | miR-3667-5p        | 6 |
| <i>circST18</i> | miR-3668           | 1 |



|                 |                                   |   |
|-----------------|-----------------------------------|---|
| <i>circST18</i> | miR-367-5p                        | 1 |
| <i>circST18</i> | miR-3670                          | 3 |
| <i>circST18</i> | miR-3671                          | 2 |
| <i>circST18</i> | miR-3674                          | 1 |
| <i>circST18</i> | miR-3675-5p                       | 1 |
| <i>circST18</i> | miR-3677-5p                       | 4 |
| <i>circST18</i> | miR-3678-3p                       | 3 |
| <i>circST18</i> | miR-3679-3p                       | 3 |
| <i>circST18</i> | miR-3680-5p                       | 1 |
| <i>circST18</i> | miR-3681-5p                       | 2 |
| <i>circST18</i> | miR-3682-3p                       | 2 |
| <i>circST18</i> | miR-3685                          | 1 |
| <i>circST18</i> | miR-3688-3p                       | 4 |
| <i>circST18</i> | miR-3688-5p                       | 1 |
| <i>circST18</i> | miR-3689a-5p/3689b-5p/3689e/3689f | 1 |
| <i>circST18</i> | miR-369-3p                        | 1 |
| <i>circST18</i> | miR-3690                          | 7 |
| <i>circST18</i> | miR-3691-3p                       | 2 |
| <i>circST18</i> | miR-3691-5p                       | 2 |
| <i>circST18</i> | miR-370-3p                        | 4 |
| <i>circST18</i> | miR-371a-3p                       | 1 |
| <i>circST18</i> | miR-371b-3p                       | 1 |
| <i>circST18</i> | miR-374-5p                        | 2 |
| <i>circST18</i> | miR-374b-3p                       | 1 |
| <i>circST18</i> | miR-376b-5p/376c-5p               | 1 |
| <i>circST18</i> | miR-376c-3p                       | 1 |
| <i>circST18</i> | miR-377-3p                        | 2 |
| <i>circST18</i> | miR-377-5p/6086                   | 1 |
| <i>circST18</i> | miR-378-3p                        | 1 |
| <i>circST18</i> | miR-378a-5p                       | 5 |
| <i>circST18</i> | miR-378g                          | 5 |
| <i>circST18</i> | miR-380-3p                        | 1 |
| <i>circST18</i> | miR-381-3p                        | 3 |
| <i>circST18</i> | miR-381-5p                        | 1 |
| <i>circST18</i> | miR-383-5p.2                      | 3 |
| <i>circST18</i> | miR-384                           | 1 |
| <i>circST18</i> | miR-3912-5p                       | 4 |
| <i>circST18</i> | miR-3915                          | 1 |

|                 |                           |   |
|-----------------|---------------------------|---|
| <i>circST18</i> | miR-3919                  | 3 |
| <i>circST18</i> | miR-3920                  | 2 |
| <i>circST18</i> | miR-3921/4653-5p          | 2 |
| <i>circST18</i> | miR-3922-5p               | 1 |
| <i>circST18</i> | miR-3925-3p               | 7 |
| <i>circST18</i> | miR-3925-5p               | 3 |
| <i>circST18</i> | miR-3926                  | 2 |
| <i>circST18</i> | miR-3927-3p/6831-5p       | 2 |
| <i>circST18</i> | miR-3927-5p               | 1 |
| <i>circST18</i> | miR-3928-3p               | 4 |
| <i>circST18</i> | miR-3928-5p/6806-3p       | 2 |
| <i>circST18</i> | miR-3929/4419b/4478       | 4 |
| <i>circST18</i> | miR-3934-5p               | 2 |
| <i>circST18</i> | miR-3936                  | 3 |
| <i>circST18</i> | miR-3937                  | 1 |
| <i>circST18</i> | miR-3938                  | 1 |
| <i>circST18</i> | miR-3941                  | 1 |
| <i>circST18</i> | miR-3944-5p               | 3 |
| <i>circST18</i> | miR-3974                  | 1 |
| <i>circST18</i> | miR-3977                  | 1 |
| <i>circST18</i> | miR-3978                  | 6 |
| <i>circST18</i> | miR-409-3p                | 1 |
| <i>circST18</i> | miR-410-3p                | 3 |
| <i>circST18</i> | miR-411-3p                | 1 |
| <i>circST18</i> | miR-423-3p                | 1 |
| <i>circST18</i> | miR-425-5p                | 3 |
| <i>circST18</i> | miR-4251                  | 2 |
| <i>circST18</i> | miR-4254                  | 7 |
| <i>circST18</i> | miR-4255                  | 2 |
| <i>circST18</i> | miR-4257                  | 4 |
| <i>circST18</i> | miR-4260                  | 1 |
| <i>circST18</i> | miR-4261                  | 4 |
| <i>circST18</i> | miR-4268                  | 1 |
| <i>circST18</i> | miR-4269/6715b-5p         | 4 |
| <i>circST18</i> | miR-4270/4441/6754-5p     | 2 |
| <i>circST18</i> | miR-4271/4725-3p/6780b-5p | 3 |
| <i>circST18</i> | miR-4272                  | 2 |
| <i>circST18</i> | miR-4273/7156-5p          | 1 |

|                 |                                    |   |
|-----------------|------------------------------------|---|
| <i>circST18</i> | miR-4274                           | 2 |
| <i>circST18</i> | miR-4277                           | 2 |
| <i>circST18</i> | miR-4279                           | 2 |
| <i>circST18</i> | miR-4281                           | 1 |
| <i>circST18</i> | miR-4284                           | 1 |
| <i>circST18</i> | miR-4286                           | 2 |
| <i>circST18</i> | miR-4287/4685-3p                   | 1 |
| <i>circST18</i> | miR-4289                           | 1 |
| <i>circST18</i> | miR-4290                           | 6 |
| <i>circST18</i> | miR-4293                           | 1 |
| <i>circST18</i> | miR-4297/5581-5p                   | 1 |
| <i>circST18</i> | miR-4302                           | 3 |
| <i>circST18</i> | miR-4303                           | 2 |
| <i>circST18</i> | miR-4307                           | 2 |
| <i>circST18</i> | miR-431-5p                         | 1 |
| <i>circST18</i> | miR-4310/7157-5p                   | 2 |
| <i>circST18</i> | miR-4313                           | 1 |
| <i>circST18</i> | miR-4317                           | 1 |
| <i>circST18</i> | miR-4318                           | 1 |
| <i>circST18</i> | miR-4324                           | 1 |
| <i>circST18</i> | miR-4325                           | 4 |
| <i>circST18</i> | miR-4326                           | 3 |
| <i>circST18</i> | miR-4327                           | 1 |
| <i>circST18</i> | miR-4328                           | 2 |
| <i>circST18</i> | miR-4329                           | 2 |
| <i>circST18</i> | miR-4419a/4510/6127/6129/6130/6133 | 1 |
| <i>circST18</i> | miR-4426/4647/4662b                | 1 |
| <i>circST18</i> | miR-4428                           | 3 |
| <i>circST18</i> | miR-4432                           | 1 |
| <i>circST18</i> | miR-4433a-3p                       | 2 |
| <i>circST18</i> | miR-4433a-5p                       | 3 |
| <i>circST18</i> | miR-4433b-5p                       | 3 |
| <i>circST18</i> | miR-4435                           | 3 |
| <i>circST18</i> | miR-4436b-5p                       | 1 |
| <i>circST18</i> | miR-4437                           | 2 |
| <i>circST18</i> | miR-4438                           | 3 |
| <i>circST18</i> | miR-4446-5p                        | 3 |
| <i>circST18</i> | miR-4448                           | 1 |

|                 |                   |    |
|-----------------|-------------------|----|
| <i>circST18</i> | miR-4450          | 1  |
| <i>circST18</i> | miR-4452          | 5  |
| <i>circST18</i> | miR-4453/4538     | 6  |
| <i>circST18</i> | miR-4459          | 2  |
| <i>circST18</i> | miR-4462          | 1  |
| <i>circST18</i> | miR-4463          | 1  |
| <i>circST18</i> | miR-4468          | 2  |
| <i>circST18</i> | miR-4469          | 1  |
| <i>circST18</i> | miR-4470          | 4  |
| <i>circST18</i> | miR-4473          | 1  |
| <i>circST18</i> | miR-4476/6876-5p  | 10 |
| <i>circST18</i> | miR-448           | 1  |
| <i>circST18</i> | miR-4482-3p       | 3  |
| <i>circST18</i> | miR-4484          | 1  |
| <i>circST18</i> | miR-4486          | 5  |
| <i>circST18</i> | miR-4491/4657     | 5  |
| <i>circST18</i> | miR-4494          | 1  |
| <i>circST18</i> | miR-4495          | 6  |
| <i>circST18</i> | miR-4496          | 11 |
| <i>circST18</i> | miR-4499          | 1  |
| <i>circST18</i> | miR-4501          | 7  |
| <i>circST18</i> | miR-4502          | 6  |
| <i>circST18</i> | miR-4503          | 2  |
| <i>circST18</i> | miR-4504          | 4  |
| <i>circST18</i> | miR-4506          | 2  |
| <i>circST18</i> | miR-4508          | 2  |
| <i>circST18</i> | miR-450a-2-3p     | 1  |
| <i>circST18</i> | miR-4514/4692     | 4  |
| <i>circST18</i> | miR-4517          | 1  |
| <i>circST18</i> | miR-4519          | 2  |
| <i>circST18</i> | miR-452-5p/892-3p | 1  |
| <i>circST18</i> | miR-4520-2-3p     | 3  |
| <i>circST18</i> | miR-4520-3p       | 1  |
| <i>circST18</i> | miR-4521          | 1  |
| <i>circST18</i> | miR-4522          | 2  |
| <i>circST18</i> | miR-4524-5p       | 3  |
| <i>circST18</i> | miR-4524a-3p      | 2  |
| <i>circST18</i> | miR-4524b-3p      | 3  |

|                 |                       |   |
|-----------------|-----------------------|---|
| <i>circST18</i> | miR-4527/6503-5p      | 1 |
| <i>circST18</i> | miR-4529-3p           | 3 |
| <i>circST18</i> | miR-4529-5p           | 1 |
| <i>circST18</i> | miR-4533              | 4 |
| <i>circST18</i> | miR-4534/8082         | 5 |
| <i>circST18</i> | miR-4536-3p           | 4 |
| <i>circST18</i> | miR-4536-5p           | 1 |
| <i>circST18</i> | miR-4537              | 2 |
| <i>circST18</i> | miR-4539              | 5 |
| <i>circST18</i> | miR-454-5p            | 1 |
| <i>circST18</i> | miR-4540              | 3 |
| <i>circST18</i> | miR-455-3p.2          | 2 |
| <i>circST18</i> | miR-455-5p            | 1 |
| <i>circST18</i> | miR-4633-3p/6500-5p   | 2 |
| <i>circST18</i> | miR-4633-5p           | 1 |
| <i>circST18</i> | miR-4635              | 1 |
| <i>circST18</i> | miR-4638-3p           | 1 |
| <i>circST18</i> | miR-4638-5p           | 1 |
| <i>circST18</i> | miR-4639-5p           | 1 |
| <i>circST18</i> | miR-4640-5p           | 3 |
| <i>circST18</i> | miR-4642              | 1 |
| <i>circST18</i> | miR-4643              | 2 |
| <i>circST18</i> | miR-4645-3p           | 2 |
| <i>circST18</i> | miR-4645-5p/4673      | 5 |
| <i>circST18</i> | miR-4646-3p           | 6 |
| <i>circST18</i> | miR-4650-5p           | 3 |
| <i>circST18</i> | miR-4652-3p           | 1 |
| <i>circST18</i> | miR-4655-3p           | 4 |
| <i>circST18</i> | miR-4659a-3p/4659b-3p | 1 |
| <i>circST18</i> | miR-4659a-5p/4659b-5p | 2 |
| <i>circST18</i> | miR-4660              | 3 |
| <i>circST18</i> | miR-4661-3p           | 1 |
| <i>circST18</i> | miR-4661-5p           | 1 |
| <i>circST18</i> | miR-4662a-3p          | 3 |
| <i>circST18</i> | miR-4663              | 2 |
| <i>circST18</i> | miR-4665-3p           | 1 |
| <i>circST18</i> | miR-4666a-3p          | 3 |
| <i>circST18</i> | miR-4666b             | 3 |

|                 |                     |   |
|-----------------|---------------------|---|
| <i>circST18</i> | miR-4667-3p         | 1 |
| <i>circST18</i> | miR-4668-3p         | 3 |
| <i>circST18</i> | miR-4668-5p         | 3 |
| <i>circST18</i> | miR-4669            | 3 |
| <i>circST18</i> | miR-4670-3p         | 2 |
| <i>circST18</i> | miR-4671-3p         | 1 |
| <i>circST18</i> | miR-4671-5p         | 1 |
| <i>circST18</i> | miR-4672            | 1 |
| <i>circST18</i> | miR-4674            | 2 |
| <i>circST18</i> | miR-4677-3p         | 1 |
| <i>circST18</i> | miR-4677-5p         | 1 |
| <i>circST18</i> | miR-4679            | 1 |
| <i>circST18</i> | miR-4681            | 2 |
| <i>circST18</i> | miR-4683            | 1 |
| <i>circST18</i> | miR-4686            | 1 |
| <i>circST18</i> | miR-4687-5p         | 3 |
| <i>circST18</i> | miR-4688/6743-5p    | 1 |
| <i>circST18</i> | miR-4689/6858-5p    | 1 |
| <i>circST18</i> | miR-4690-3p/5685    | 1 |
| <i>circST18</i> | miR-4690-5p         | 3 |
| <i>circST18</i> | miR-4691-3p         | 1 |
| <i>circST18</i> | miR-4691-5p/6792-3p | 5 |
| <i>circST18</i> | miR-4693-5p         | 2 |
| <i>circST18</i> | miR-4694-3p         | 3 |
| <i>circST18</i> | miR-4694-5p         | 1 |
| <i>circST18</i> | miR-4695-3p         | 1 |
| <i>circST18</i> | miR-4696            | 2 |
| <i>circST18</i> | miR-4698            | 4 |
| <i>circST18</i> | miR-4699-5p         | 3 |
| <i>circST18</i> | miR-4700-3p         | 4 |
| <i>circST18</i> | miR-4704-3p         | 1 |
| <i>circST18</i> | miR-4704-5p         | 1 |
| <i>circST18</i> | miR-4705            | 2 |
| <i>circST18</i> | miR-4708-5p         | 1 |
| <i>circST18</i> | miR-4713-5p         | 2 |
| <i>circST18</i> | miR-4714-5p         | 1 |
| <i>circST18</i> | miR-4715-3p         | 1 |
| <i>circST18</i> | miR-4716-5p         | 1 |

|                 |                     |    |
|-----------------|---------------------|----|
| <i>circST18</i> | miR-4717-3p         | 2  |
| <i>circST18</i> | miR-4717-5p         | 1  |
| <i>circST18</i> | miR-4719            | 2  |
| <i>circST18</i> | miR-4720-3p         | 1  |
| <i>circST18</i> | miR-4721            | 2  |
| <i>circST18</i> | miR-4722-3p/6727-3p | 1  |
| <i>circST18</i> | miR-4726-3p         | 3  |
| <i>circST18</i> | miR-4731-3p/4801    | 1  |
| <i>circST18</i> | miR-4731-5p         | 4  |
| <i>circST18</i> | miR-4732-3p         | 10 |
| <i>circST18</i> | miR-4733-3p         | 3  |
| <i>circST18</i> | miR-4733-5p         | 1  |
| <i>circST18</i> | miR-4739            | 2  |
| <i>circST18</i> | miR-4742-5p         | 4  |
| <i>circST18</i> | miR-4743-3p         | 1  |
| <i>circST18</i> | miR-4747-3p         | 2  |
| <i>circST18</i> | miR-4750-3p         | 1  |
| <i>circST18</i> | miR-4752            | 5  |
| <i>circST18</i> | miR-4753-5p         | 2  |
| <i>circST18</i> | miR-4755-3p         | 2  |
| <i>circST18</i> | miR-4755-5p/5006-3p | 2  |
| <i>circST18</i> | miR-4756-3p         | 3  |
| <i>circST18</i> | miR-4757-3p         | 1  |
| <i>circST18</i> | miR-4757-5p/6744-3p | 2  |
| <i>circST18</i> | miR-4758-3p         | 1  |
| <i>circST18</i> | miR-4760-3p         | 2  |
| <i>circST18</i> | miR-4764-3p         | 2  |
| <i>circST18</i> | miR-4766-3p         | 1  |
| <i>circST18</i> | miR-4768-3p         | 2  |
| <i>circST18</i> | miR-4769-3p/6817-5p | 3  |
| <i>circST18</i> | miR-4771            | 1  |
| <i>circST18</i> | miR-4772-3p         | 4  |
| <i>circST18</i> | miR-4776-3p         | 4  |
| <i>circST18</i> | miR-4777-3p         | 1  |
| <i>circST18</i> | miR-4777-5p         | 2  |
| <i>circST18</i> | miR-4778-3p         | 2  |
| <i>circST18</i> | miR-4778-5p         | 4  |
| <i>circST18</i> | miR-4780            | 2  |

|                 |                     |   |
|-----------------|---------------------|---|
| <i>circST18</i> | miR-4781-3p         | 1 |
| <i>circST18</i> | miR-4786-3p         | 1 |
| <i>circST18</i> | miR-4786-5p         | 4 |
| <i>circST18</i> | miR-4787-3p         | 1 |
| <i>circST18</i> | miR-4789-3p         | 2 |
| <i>circST18</i> | miR-4790-3p         | 1 |
| <i>circST18</i> | miR-4793-3p         | 4 |
| <i>circST18</i> | miR-4793-5p         | 2 |
| <i>circST18</i> | miR-4795-5p         | 6 |
| <i>circST18</i> | miR-4796-3p         | 4 |
| <i>circST18</i> | miR-4796-5p         | 1 |
| <i>circST18</i> | miR-4797-5p         | 4 |
| <i>circST18</i> | miR-4798-3p         | 1 |
| <i>circST18</i> | miR-4798-5p         | 1 |
| <i>circST18</i> | miR-4799-5p         | 2 |
| <i>circST18</i> | miR-4802-3p         | 1 |
| <i>circST18</i> | miR-4803            | 1 |
| <i>circST18</i> | miR-4804-3p         | 1 |
| <i>circST18</i> | miR-483-3p.1        | 3 |
| <i>circST18</i> | miR-483-3p.2        | 2 |
| <i>circST18</i> | miR-484/3155        | 4 |
| <i>circST18</i> | miR-486-3p          | 1 |
| <i>circST18</i> | miR-490-3p          | 1 |
| <i>circST18</i> | miR-491-3p          | 1 |
| <i>circST18</i> | miR-493-3p          | 5 |
| <i>circST18</i> | miR-494-3p          | 2 |
| <i>circST18</i> | miR-497-3p          | 2 |
| <i>circST18</i> | miR-499a-3p/499b-3p | 4 |
| <i>circST18</i> | miR-499a-5p         | 4 |
| <i>circST18</i> | miR-499b-5p         | 1 |
| <i>circST18</i> | miR-5002-3p         | 2 |
| <i>circST18</i> | miR-5006-5p         | 4 |
| <i>circST18</i> | miR-5007-5p         | 3 |
| <i>circST18</i> | miR-5008-5p         | 1 |
| <i>circST18</i> | miR-5009-3p         | 4 |
| <i>circST18</i> | miR-5009-5p/8058    | 3 |
| <i>circST18</i> | miR-500a-3p         | 1 |
| <i>circST18</i> | miR-500a-5p         | 3 |



|                 |                             |   |
|-----------------|-----------------------------|---|
| <i>circST18</i> | miR-500b-3p                 | 4 |
| <i>circST18</i> | miR-501-5p                  | 1 |
| <i>circST18</i> | miR-5010-3p                 | 2 |
| <i>circST18</i> | miR-5011-3p                 | 3 |
| <i>circST18</i> | miR-502-5p                  | 1 |
| <i>circST18</i> | miR-503-5p                  | 3 |
| <i>circST18</i> | miR-504-3p                  | 2 |
| <i>circST18</i> | miR-505-5p                  | 3 |
| <i>circST18</i> | miR-508-5p                  | 2 |
| <i>circST18</i> | miR-5088-3p                 | 1 |
| <i>circST18</i> | miR-509-3-5p/509-5p/4418    | 3 |
| <i>circST18</i> | miR-5090/6775-5p            | 2 |
| <i>circST18</i> | miR-5093                    | 6 |
| <i>circST18</i> | miR-5095/7151-3p            | 2 |
| <i>circST18</i> | miR-5096                    | 1 |
| <i>circST18</i> | miR-510-3p                  | 2 |
| <i>circST18</i> | miR-512-3p                  | 1 |
| <i>circST18</i> | miR-512-5p                  | 1 |
| <i>circST18</i> | miR-513a-3p/513c-3p/3606-3p | 6 |
| <i>circST18</i> | miR-513b-3p                 | 2 |
| <i>circST18</i> | miR-513b-5p                 | 3 |
| <i>circST18</i> | miR-514a-5p                 | 1 |
| <i>circST18</i> | miR-515-5p/519e-5p          | 4 |
| <i>circST18</i> | miR-517-3p                  | 4 |
| <i>circST18</i> | miR-5186                    | 2 |
| <i>circST18</i> | miR-5187-5p                 | 2 |
| <i>circST18</i> | miR-5189-3p                 | 1 |
| <i>circST18</i> | miR-518c-5p                 | 1 |
| <i>circST18</i> | miR-518d-5p/519-5p          | 2 |
| <i>circST18</i> | miR-519-3p                  | 3 |
| <i>circST18</i> | miR-5190                    | 3 |
| <i>circST18</i> | miR-5191                    | 1 |
| <i>circST18</i> | miR-5195-5p                 | 5 |
| <i>circST18</i> | miR-5196-3p                 | 2 |
| <i>circST18</i> | miR-5197-5p                 | 3 |
| <i>circST18</i> | miR-519d-5p                 | 4 |
| <i>circST18</i> | miR-520f-5p                 | 3 |
| <i>circST18</i> | miR-520g-5p                 | 1 |

|                 |                                               |   |
|-----------------|-----------------------------------------------|---|
| <i>circST18</i> | miR-522-3p                                    | 3 |
| <i>circST18</i> | miR-524-5p                                    | 2 |
| <i>circST18</i> | miR-532-3p                                    | 3 |
| <i>circST18</i> | miR-539-3p                                    | 1 |
| <i>circST18</i> | miR-539-5p                                    | 4 |
| <i>circST18</i> | miR-542-3p                                    | 4 |
| <i>circST18</i> | miR-542-5p                                    | 2 |
| <i>circST18</i> | miR-544a                                      | 2 |
| <i>circST18</i> | miR-544b                                      | 1 |
| <i>circST18</i> | miR-545-5p                                    | 6 |
| <i>circST18</i> | miR-548ah-5p/3609                             | 2 |
| <i>circST18</i> | miR-548aj-5p/548f-5p/548g-5p/548x-5p          | 1 |
| <i>circST18</i> | miR-548an                                     | 1 |
| <i>circST18</i> | miR-548ao-3p                                  | 6 |
| <i>circST18</i> | miR-548ao-5p/548ax                            | 1 |
| <i>circST18</i> | miR-548at-5p                                  | 2 |
| <i>circST18</i> | miR-548au-3p                                  | 2 |
| <i>circST18</i> | miR-548av-3p                                  | 3 |
| <i>circST18</i> | miR-548az-3p/548ar-3p/548a-3p/548e-3p/548f-3p | 7 |
| <i>circST18</i> | miR-548az-5p/548t-5p                          | 2 |
| <i>circST18</i> | miR-548c-3p                                   | 5 |
| <i>circST18</i> | miR-548e-5p                                   | 3 |
| <i>circST18</i> | miR-548n                                      | 2 |
| <i>circST18</i> | miR-548p                                      | 3 |
| <i>circST18</i> | miR-548s                                      | 3 |
| <i>circST18</i> | miR-549a                                      | 1 |
| <i>circST18</i> | miR-552-3p                                    | 3 |
| <i>circST18</i> | miR-552-5p                                    | 1 |
| <i>circST18</i> | miR-556-5p                                    | 2 |
| <i>circST18</i> | miR-5571-5p                                   | 2 |
| <i>circST18</i> | miR-5572                                      | 1 |
| <i>circST18</i> | miR-5579-3p                                   | 1 |
| <i>circST18</i> | miR-5580-3p                                   | 1 |
| <i>circST18</i> | miR-5582-3p                                   | 5 |
| <i>circST18</i> | miR-5582-5p                                   | 1 |
| <i>circST18</i> | miR-5583-3p                                   | 1 |
| <i>circST18</i> | miR-5584-3p                                   | 1 |
| <i>circST18</i> | miR-5584-5p                                   | 1 |

|                 |                 |   |
|-----------------|-----------------|---|
| <i>circST18</i> | miR-5585-5p     | 1 |
| <i>circST18</i> | miR-5587-5p     | 2 |
| <i>circST18</i> | miR-5588-3p     | 3 |
| <i>circST18</i> | miR-5589-3p     | 2 |
| <i>circST18</i> | miR-5589-5p     | 4 |
| <i>circST18</i> | miR-5590-5p     | 2 |
| <i>circST18</i> | miR-561-3p      | 2 |
| <i>circST18</i> | miR-564         | 3 |
| <i>circST18</i> | miR-566         | 1 |
| <i>circST18</i> | miR-567         | 1 |
| <i>circST18</i> | miR-5681b       | 1 |
| <i>circST18</i> | miR-5684        | 2 |
| <i>circST18</i> | miR-569         | 1 |
| <i>circST18</i> | miR-5691        | 3 |
| <i>circST18</i> | miR-5692bc      | 1 |
| <i>circST18</i> | miR-5693        | 2 |
| <i>circST18</i> | miR-5694        | 3 |
| <i>circST18</i> | miR-5695        | 4 |
| <i>circST18</i> | miR-5699-5p     | 1 |
| <i>circST18</i> | miR-570-3p      | 2 |
| <i>circST18</i> | miR-5708        | 1 |
| <i>circST18</i> | miR-573/3616-5p | 1 |
| <i>circST18</i> | miR-576-3p      | 1 |
| <i>circST18</i> | miR-577         | 3 |
| <i>circST18</i> | miR-578         | 1 |
| <i>circST18</i> | miR-580-3p      | 2 |
| <i>circST18</i> | miR-580-5p      | 1 |
| <i>circST18</i> | miR-581         | 1 |
| <i>circST18</i> | miR-586         | 4 |
| <i>circST18</i> | miR-587         | 1 |
| <i>circST18</i> | miR-588         | 3 |
| <i>circST18</i> | miR-592         | 1 |
| <i>circST18</i> | miR-595         | 3 |
| <i>circST18</i> | miR-596         | 1 |
| <i>circST18</i> | miR-597-3p      | 1 |
| <i>circST18</i> | miR-599         | 1 |
| <i>circST18</i> | miR-604         | 4 |
| <i>circST18</i> | miR-605-5p      | 3 |

|                 |                                      |    |
|-----------------|--------------------------------------|----|
| <i>circST18</i> | miR-6068                             | 1  |
| <i>circST18</i> | miR-607                              | 2  |
| <i>circST18</i> | miR-6072/6891-3p                     | 3  |
| <i>circST18</i> | miR-6073                             | 2  |
| <i>circST18</i> | miR-6076/6797-3p                     | 4  |
| <i>circST18</i> | miR-6077                             | 10 |
| <i>circST18</i> | miR-6079                             | 6  |
| <i>circST18</i> | miR-608/4651                         | 1  |
| <i>circST18</i> | miR-6080                             | 1  |
| <i>circST18</i> | miR-6081                             | 2  |
| <i>circST18</i> | miR-6083                             | 1  |
| <i>circST18</i> | miR-6085/6813-5p                     | 1  |
| <i>circST18</i> | miR-6089                             | 1  |
| <i>circST18</i> | miR-610                              | 1  |
| <i>circST18</i> | miR-612/1285-3p/3187-5p/5189-5p/6860 | 5  |
| <i>circST18</i> | miR-6124                             | 4  |
| <i>circST18</i> | miR-6125                             | 1  |
| <i>circST18</i> | miR-6126                             | 1  |
| <i>circST18</i> | miR-6128                             | 4  |
| <i>circST18</i> | miR-614                              | 1  |
| <i>circST18</i> | miR-615-5p                           | 1  |
| <i>circST18</i> | miR-6165                             | 3  |
| <i>circST18</i> | miR-618                              | 3  |
| <i>circST18</i> | miR-619-3p                           | 3  |
| <i>circST18</i> | miR-619-5p/6506-5p                   | 3  |
| <i>circST18</i> | miR-622                              | 2  |
| <i>circST18</i> | miR-623                              | 2  |
| <i>circST18</i> | miR-624-3p                           | 1  |
| <i>circST18</i> | miR-624-5p                           | 1  |
| <i>circST18</i> | miR-625-3p                           | 1  |
| <i>circST18</i> | miR-629-3p                           | 2  |
| <i>circST18</i> | miR-631/3661                         | 4  |
| <i>circST18</i> | miR-635/6774-5p                      | 1  |
| <i>circST18</i> | miR-636                              | 1  |
| <i>circST18</i> | miR-639                              | 1  |
| <i>circST18</i> | miR-641/3617-5p                      | 5  |
| <i>circST18</i> | miR-642-3p                           | 3  |
| <i>circST18</i> | miR-642a-5p                          | 3  |

|                 |                     |   |
|-----------------|---------------------|---|
| <i>circST18</i> | miR-642b-5p         | 1 |
| <i>circST18</i> | miR-643             | 1 |
| <i>circST18</i> | miR-645             | 1 |
| <i>circST18</i> | miR-646             | 3 |
| <i>circST18</i> | miR-648             | 1 |
| <i>circST18</i> | miR-649             | 1 |
| <i>circST18</i> | miR-6499-3p         | 2 |
| <i>circST18</i> | miR-6500-3p         | 1 |
| <i>circST18</i> | miR-6501-3p         | 2 |
| <i>circST18</i> | miR-6502-3p         | 1 |
| <i>circST18</i> | miR-6503-3p         | 1 |
| <i>circST18</i> | miR-6504-3p         | 1 |
| <i>circST18</i> | miR-6505-5p         | 2 |
| <i>circST18</i> | miR-6508-3p         | 3 |
| <i>circST18</i> | miR-6508-5p/8067    | 2 |
| <i>circST18</i> | miR-6509-3p         | 1 |
| <i>circST18</i> | miR-6510-5p         | 3 |
| <i>circST18</i> | miR-6512-5p         | 2 |
| <i>circST18</i> | miR-6513-3p         | 2 |
| <i>circST18</i> | miR-6515-3p         | 4 |
| <i>circST18</i> | miR-6516-3p         | 2 |
| <i>circST18</i> | miR-6516-5p         | 2 |
| <i>circST18</i> | miR-652-5p          | 1 |
| <i>circST18</i> | miR-655-5p          | 1 |
| <i>circST18</i> | miR-659-3p          | 1 |
| <i>circST18</i> | miR-661             | 1 |
| <i>circST18</i> | miR-662             | 1 |
| <i>circST18</i> | miR-663b            | 2 |
| <i>circST18</i> | miR-664a-3p         | 2 |
| <i>circST18</i> | miR-665             | 6 |
| <i>circST18</i> | miR-670-5p          | 2 |
| <i>circST18</i> | miR-6715a-3p        | 2 |
| <i>circST18</i> | miR-6716-5p         | 1 |
| <i>circST18</i> | miR-6721-5p         | 2 |
| <i>circST18</i> | miR-6723-5p         | 3 |
| <i>circST18</i> | miR-6724-5p/6773-5p | 2 |
| <i>circST18</i> | miR-6727-5p         | 2 |
| <i>circST18</i> | miR-6728-3p         | 1 |

|                 |                             |   |
|-----------------|-----------------------------|---|
| <i>circST18</i> | miR-6729-3p                 | 1 |
| <i>circST18</i> | miR-6731-3p                 | 1 |
| <i>circST18</i> | miR-6731-5p/8085            | 2 |
| <i>circST18</i> | miR-6733-3p                 | 3 |
| <i>circST18</i> | miR-6734-3p                 | 1 |
| <i>circST18</i> | miR-6735-3p                 | 2 |
| <i>circST18</i> | miR-6736-3p                 | 2 |
| <i>circST18</i> | miR-6737-5p/6812-5p/6819-5p | 1 |
| <i>circST18</i> | miR-6738-3p                 | 2 |
| <i>circST18</i> | miR-6739-3p                 | 1 |
| <i>circST18</i> | miR-6740-3p                 | 2 |
| <i>circST18</i> | miR-6740-5p                 | 2 |
| <i>circST18</i> | miR-6741-5p                 | 1 |
| <i>circST18</i> | miR-6742-3p                 | 3 |
| <i>circST18</i> | miR-6747-3p                 | 1 |
| <i>circST18</i> | miR-6747-5p                 | 1 |
| <i>circST18</i> | miR-6749-3p                 | 5 |
| <i>circST18</i> | miR-6750-5p/6822-5p         | 1 |
| <i>circST18</i> | miR-6753-3p/7107-3p         | 1 |
| <i>circST18</i> | miR-6753-5p                 | 3 |
| <i>circST18</i> | miR-6755-3p                 | 1 |
| <i>circST18</i> | miR-6755-5p                 | 2 |
| <i>circST18</i> | miR-6756-5p/6766-5p         | 1 |
| <i>circST18</i> | miR-6760-3p                 | 1 |
| <i>circST18</i> | miR-6760-5p                 | 2 |
| <i>circST18</i> | miR-6761-5p                 | 2 |
| <i>circST18</i> | miR-6762-3p                 | 4 |
| <i>circST18</i> | miR-6762-5p/6845-5p         | 2 |
| <i>circST18</i> | miR-6764-3p/6824-3p         | 1 |
| <i>circST18</i> | miR-6767-3p                 | 5 |
| <i>circST18</i> | miR-6767-5p                 | 3 |
| <i>circST18</i> | miR-6768-3p                 | 1 |
| <i>circST18</i> | miR-6768-5p                 | 5 |
| <i>circST18</i> | miR-6770-5p                 | 3 |
| <i>circST18</i> | miR-6771-3p                 | 1 |
| <i>circST18</i> | miR-6772-3p                 | 1 |
| <i>circST18</i> | miR-6776-3p                 | 2 |
| <i>circST18</i> | miR-6776-5p                 | 1 |

|                 |                     |    |
|-----------------|---------------------|----|
| <i>circST18</i> | miR-6778-3p         | 3  |
| <i>circST18</i> | miR-6779-3p         | 3  |
| <i>circST18</i> | miR-6780b-3p        | 2  |
| <i>circST18</i> | miR-6782-3p         | 1  |
| <i>circST18</i> | miR-6782-5p         | 1  |
| <i>circST18</i> | miR-6783-5p         | 2  |
| <i>circST18</i> | miR-6785-3p         | 3  |
| <i>circST18</i> | miR-6787-3p         | 3  |
| <i>circST18</i> | miR-6789-3p         | 1  |
| <i>circST18</i> | miR-6791-3p/6829-3p | 3  |
| <i>circST18</i> | miR-6792-5p         | 2  |
| <i>circST18</i> | miR-6798-5p         | 1  |
| <i>circST18</i> | miR-6800-3p         | 1  |
| <i>circST18</i> | miR-6801-3p/6810-3p | 9  |
| <i>circST18</i> | miR-6802-3p         | 1  |
| <i>circST18</i> | miR-6803-3p         | 4  |
| <i>circST18</i> | miR-6804-3p         | 1  |
| <i>circST18</i> | miR-6804-5p         | 1  |
| <i>circST18</i> | miR-6807-5p         | 1  |
| <i>circST18</i> | miR-6808-3p         | 2  |
| <i>circST18</i> | miR-6810-5p         | 2  |
| <i>circST18</i> | miR-6814-3p/6872-5p | 2  |
| <i>circST18</i> | miR-6814-5p         | 2  |
| <i>circST18</i> | miR-6816-3p         | 3  |
| <i>circST18</i> | miR-6817-3p         | 1  |
| <i>circST18</i> | miR-6819-3p/6877-3p | 2  |
| <i>circST18</i> | miR-6822-3p         | 2  |
| <i>circST18</i> | miR-6826-3p         | 2  |
| <i>circST18</i> | miR-6830-3p         | 2  |
| <i>circST18</i> | miR-6830-5p         | 10 |
| <i>circST18</i> | miR-6832-3p         | 1  |
| <i>circST18</i> | miR-6833-5p         | 5  |
| <i>circST18</i> | miR-6836-3p         | 1  |
| <i>circST18</i> | miR-6838-3p         | 1  |
| <i>circST18</i> | miR-6840-3p         | 3  |
| <i>circST18</i> | miR-6841-5p         | 2  |
| <i>circST18</i> | miR-6843-3p/6848-3p | 1  |
| <i>circST18</i> | miR-6844            | 3  |

|                 |             |    |
|-----------------|-------------|----|
| <i>circST18</i> | miR-6845-3p | 3  |
| <i>circST18</i> | miR-6846-3p | 3  |
| <i>circST18</i> | miR-6847-3p | 3  |
| <i>circST18</i> | miR-6847-5p | 4  |
| <i>circST18</i> | miR-6849-3p | 1  |
| <i>circST18</i> | miR-6852-5p | 3  |
| <i>circST18</i> | miR-6857-5p | 2  |
| <i>circST18</i> | miR-6859-3p | 3  |
| <i>circST18</i> | miR-6861-5p | 1  |
| <i>circST18</i> | miR-6864-5p | 1  |
| <i>circST18</i> | miR-6865-3p | 2  |
| <i>circST18</i> | miR-6867-3p | 2  |
| <i>circST18</i> | miR-6868-3p | 2  |
| <i>circST18</i> | miR-6870-3p | 4  |
| <i>circST18</i> | miR-6871-3p | 1  |
| <i>circST18</i> | miR-6872-3p | 1  |
| <i>circST18</i> | miR-6873-5p | 3  |
| <i>circST18</i> | miR-6874-5p | 4  |
| <i>circST18</i> | miR-6875-3p | 1  |
| <i>circST18</i> | miR-6878-5p | 2  |
| <i>circST18</i> | miR-6880-5p | 1  |
| <i>circST18</i> | miR-6882-3p | 3  |
| <i>circST18</i> | miR-6883-3p | 1  |
| <i>circST18</i> | miR-6885-3p | 3  |
| <i>circST18</i> | miR-6886-5p | 2  |
| <i>circST18</i> | miR-6888-3p | 1  |
| <i>circST18</i> | miR-6890-5p | 1  |
| <i>circST18</i> | miR-6892-3p | 2  |
| <i>circST18</i> | miR-7-3p    | 4  |
| <i>circST18</i> | miR-7-5p    | 10 |
| <i>circST18</i> | miR-7110-3p | 1  |
| <i>circST18</i> | miR-7113-3p | 1  |
| <i>circST18</i> | miR-7152-3p | 2  |
| <i>circST18</i> | miR-7152-5p | 4  |
| <i>circST18</i> | miR-7156-3p | 3  |
| <i>circST18</i> | miR-7159-3p | 3  |
| <i>circST18</i> | miR-7160-5p | 2  |
| <i>circST18</i> | miR-7161-3p | 4  |



|                 |              |   |
|-----------------|--------------|---|
| <i>circST18</i> | miR-7515     | 1 |
| <i>circST18</i> | miR-758-3p   | 2 |
| <i>circST18</i> | miR-759      | 1 |
| <i>circST18</i> | miR-760      | 2 |
| <i>circST18</i> | miR-764      | 1 |
| <i>circST18</i> | miR-766-3p   | 7 |
| <i>circST18</i> | miR-767-3p   | 2 |
| <i>circST18</i> | miR-767-5p   | 1 |
| <i>circST18</i> | miR-769-5p   | 4 |
| <i>circST18</i> | miR-770-5p   | 1 |
| <i>circST18</i> | miR-7703     | 4 |
| <i>circST18</i> | miR-7704     | 1 |
| <i>circST18</i> | miR-7705     | 2 |
| <i>circST18</i> | miR-7844-5p  | 3 |
| <i>circST18</i> | miR-7849-3p  | 2 |
| <i>circST18</i> | miR-7851-3p  | 3 |
| <i>circST18</i> | miR-7852-3p  | 1 |
| <i>circST18</i> | miR-7855-5p  | 1 |
| <i>circST18</i> | miR-7856-5p  | 1 |
| <i>circST18</i> | miR-7973     | 2 |
| <i>circST18</i> | miR-7976     | 1 |
| <i>circST18</i> | miR-7977     | 3 |
| <i>circST18</i> | miR-802      | 6 |
| <i>circST18</i> | miR-8056     | 2 |
| <i>circST18</i> | miR-8060     | 5 |
| <i>circST18</i> | miR-8063     | 4 |
| <i>circST18</i> | miR-8065     | 3 |
| <i>circST18</i> | miR-8066     | 2 |
| <i>circST18</i> | miR-8068     | 1 |
| <i>circST18</i> | miR-8070     | 8 |
| <i>circST18</i> | miR-8071     | 1 |
| <i>circST18</i> | miR-8077     | 2 |
| <i>circST18</i> | miR-8080     | 3 |
| <i>circST18</i> | miR-8087     | 1 |
| <i>circST18</i> | miR-873-5p.1 | 3 |
| <i>circST18</i> | miR-874-3p   | 4 |
| <i>circST18</i> | miR-874-5p   | 1 |
| <i>circST18</i> | miR-875-3p   | 6 |

|                 |                                       |   |
|-----------------|---------------------------------------|---|
| <i>circST18</i> | miR-875-5p                            | 1 |
| <i>circST18</i> | miR-876-3p                            | 4 |
| <i>circST18</i> | miR-885-3p                            | 1 |
| <i>circST18</i> | miR-888-3p                            | 1 |
| <i>circST18</i> | miR-889-3p                            | 2 |
| <i>circST18</i> | miR-889-5p                            | 3 |
| <i>circST18</i> | miR-890                               | 2 |
| <i>circST18</i> | miR-891a-3p                           | 1 |
| <i>circST18</i> | miR-892a                              | 1 |
| <i>circST18</i> | miR-9-5p                              | 1 |
| <i>circST18</i> | miR-921                               | 2 |
| <i>circST18</i> | miR-922                               | 3 |
| <i>circST18</i> | miR-924                               | 1 |
| <i>circST18</i> | miR-935                               | 2 |
| <i>circST18</i> | miR-936                               | 2 |
| <i>circST18</i> | miR-939-3p                            | 3 |
| <i>circST18</i> | miR-940/6808-5p/6893-5p               | 3 |
| <i>circST18</i> | miR-943                               | 2 |
| <i>circST18</i> | miR-9500                              | 1 |
| <i>circST18</i> | miR-96-3p                             | 3 |
| <i>circST18</i> | miR-96-5p/1271-5p                     | 1 |
| <i>circST18</i> | miR-451b                              | 1 |
| <i>circST18</i> | miR-6090                              | 1 |
| <i>circST18</i> | miR-920/4300/5591-5p/6726-5p          | 1 |
| <i>circST18</i> | let-7a-3p/let-7b-3p/let-7f-1-3p/98-3p | 5 |
| <i>circST18</i> | let-7d-3p                             | 1 |
| <i>circST18</i> | let-7e-3p                             | 1 |
| <i>circST18</i> | let-7f-2-3p/1185-3p                   | 5 |
| <i>circST18</i> | miR-101-3p.2                          | 2 |
| <i>circST18</i> | miR-10b-3p                            | 1 |
| <i>circST18</i> | miR-1206                              | 3 |
| <i>circST18</i> | miR-1226-5p                           | 1 |
| <i>circST18</i> | miR-1227-5p                           | 4 |
| <i>circST18</i> | miR-1231                              | 3 |
| <i>circST18</i> | miR-124-3p.1                          | 2 |
| <i>circST18</i> | miR-124-3p.2/506-3p                   | 2 |
| <i>circST18</i> | miR-1266-3p                           | 1 |
| <i>circST18</i> | miR-1273a                             | 1 |

|                 |               |   |
|-----------------|---------------|---|
| <i>circST18</i> | miR-1273c     | 1 |
| <i>circST18</i> | miR-1278      | 5 |
| <i>circST18</i> | miR-1286      | 2 |
| <i>circST18</i> | miR-1290      | 4 |
| <i>circST18</i> | miR-1295a     | 1 |
| <i>circST18</i> | miR-1295b-3p  | 2 |
| <i>circST18</i> | miR-136-5p    | 1 |
| <i>circST18</i> | miR-137       | 4 |
| <i>circST18</i> | miR-139-5p    | 2 |
| <i>circST18</i> | miR-142-3p.2  | 2 |
| <i>circST18</i> | miR-154-5p    | 1 |
| <i>circST18</i> | miR-155-3p    | 2 |
| <i>circST18</i> | miR-181-5p    | 1 |
| <i>circST18</i> | miR-184       | 2 |
| <i>circST18</i> | miR-208-5p    | 2 |
| <i>circST18</i> | miR-210-5p    | 6 |
| <i>circST18</i> | miR-216a-5p   | 2 |
| <i>circST18</i> | miR-216b-5p   | 2 |
| <i>circST18</i> | miR-219a-1-3p | 3 |
| <i>circST18</i> | miR-219a-2-3p | 1 |
| <i>circST18</i> | miR-219b-3p   | 1 |
| <i>circST18</i> | miR-224-5p    | 3 |
| <i>circST18</i> | miR-2467-5p   | 3 |
| <i>circST18</i> | miR-2909      | 2 |
| <i>circST18</i> | miR-296-5p    | 1 |
| <i>circST18</i> | miR-297       | 2 |
| <i>circST18</i> | miR-29b-1-5p  | 2 |
| <i>circST18</i> | miR-3140-3p   | 1 |
| <i>circST18</i> | miR-3141      | 1 |
| <i>circST18</i> | miR-3143      | 1 |
| <i>circST18</i> | miR-3145-3p   | 1 |
| <i>circST18</i> | miR-3162-5p   | 1 |
| <i>circST18</i> | miR-3169      | 5 |
| <i>circST18</i> | miR-3178      | 1 |
| <i>circST18</i> | miR-3180-3p   | 4 |
| <i>circST18</i> | miR-3180-5p   | 5 |
| <i>circST18</i> | miR-3188      | 3 |
| <i>circST18</i> | miR-3191-5p   | 2 |

|                 |                       |   |
|-----------------|-----------------------|---|
| <i>circST18</i> | miR-320               | 5 |
| <i>circST18</i> | miR-3591-5p           | 2 |
| <i>circST18</i> | miR-3619-3p           | 1 |
| <i>circST18</i> | miR-3622a-3p/3622b-3p | 1 |
| <i>circST18</i> | miR-3653-3p           | 6 |
| <i>circST18</i> | miR-3659              | 2 |
| <i>circST18</i> | miR-3675-3p           | 1 |
| <i>circST18</i> | miR-3683              | 1 |
| <i>circST18</i> | miR-3714              | 2 |
| <i>circST18</i> | miR-376a-2-5p         | 1 |
| <i>circST18</i> | miR-376a-5p           | 1 |
| <i>circST18</i> | miR-379-5p            | 5 |
| <i>circST18</i> | miR-382-5p            | 2 |
| <i>circST18</i> | miR-3908              | 1 |
| <i>circST18</i> | miR-3910              | 2 |
| <i>circST18</i> | miR-3912-3p           | 1 |
| <i>circST18</i> | miR-3924              | 1 |
| <i>circST18</i> | miR-3934-3p           | 1 |
| <i>circST18</i> | miR-3940-5p/4507      | 1 |
| <i>circST18</i> | miR-3942-5p           | 1 |
| <i>circST18</i> | miR-3945              | 1 |
| <i>circST18</i> | miR-3975              | 3 |
| <i>circST18</i> | miR-411-5p.1          | 1 |
| <i>circST18</i> | miR-421               | 1 |
| <i>circST18</i> | miR-424-3p            | 3 |
| <i>circST18</i> | miR-4253/6862-5p      | 1 |
| <i>circST18</i> | miR-4278              | 1 |
| <i>circST18</i> | miR-4280              | 1 |
| <i>circST18</i> | miR-4320              | 2 |
| <i>circST18</i> | miR-4433b-3p          | 2 |
| <i>circST18</i> | miR-4451              | 5 |
| <i>circST18</i> | miR-4477a             | 1 |
| <i>circST18</i> | miR-4477b             | 1 |
| <i>circST18</i> | miR-4493              | 2 |
| <i>circST18</i> | miR-4509              | 2 |
| <i>circST18</i> | miR-4512              | 1 |
| <i>circST18</i> | miR-4520-5p           | 4 |
| <i>circST18</i> | miR-4523              | 2 |

|                 |                              |   |
|-----------------|------------------------------|---|
| <i>circST18</i> | miR-4649-3p                  | 1 |
| <i>circST18</i> | miR-4649-5p/6729-5p          | 4 |
| <i>circST18</i> | miR-4650-3p                  | 5 |
| <i>circST18</i> | miR-4682                     | 3 |
| <i>circST18</i> | miR-4684-3p                  | 1 |
| <i>circST18</i> | miR-4699-3p                  | 1 |
| <i>circST18</i> | miR-4703-3p                  | 1 |
| <i>circST18</i> | miR-4709-5p                  | 1 |
| <i>circST18</i> | miR-4722-5p                  | 2 |
| <i>circST18</i> | miR-4729                     | 4 |
| <i>circST18</i> | miR-4732-5p                  | 2 |
| <i>circST18</i> | miR-4744                     | 2 |
| <i>circST18</i> | miR-4749-3p                  | 6 |
| <i>circST18</i> | miR-4751                     | 1 |
| <i>circST18</i> | miR-4759                     | 5 |
| <i>circST18</i> | miR-4789-5p                  | 5 |
| <i>circST18</i> | miR-4790-5p                  | 1 |
| <i>circST18</i> | miR-485-5p                   | 3 |
| <i>circST18</i> | miR-487a-5p/487b-5p          | 1 |
| <i>circST18</i> | miR-488-5p                   | 4 |
| <i>circST18</i> | miR-495-5p                   | 2 |
| <i>circST18</i> | miR-5000-3p                  | 7 |
| <i>circST18</i> | miR-5000-5p                  | 2 |
| <i>circST18</i> | miR-5003-3p                  | 3 |
| <i>circST18</i> | miR-5004-5p                  | 1 |
| <i>circST18</i> | miR-5007-3p                  | 3 |
| <i>circST18</i> | miR-5008-3p/6737-3p/7157-3p  | 5 |
| <i>circST18</i> | miR-505-3p.2                 | 1 |
| <i>circST18</i> | miR-506-5p                   | 1 |
| <i>circST18</i> | miR-5089-3p                  | 1 |
| <i>circST18</i> | miR-514a-3p                  | 3 |
| <i>circST18</i> | miR-518a-5p/527              | 2 |
| <i>circST18</i> | miR-524-3p/525-3p            | 2 |
| <i>circST18</i> | miR-543                      | 1 |
| <i>circST18</i> | miR-545-3p                   | 1 |
| <i>circST18</i> | miR-548ad-3p                 | 3 |
| <i>circST18</i> | miR-548ai/548ag/548ba/570-5p | 6 |
| <i>circST18</i> | miR-548aw                    | 2 |

|                 |              |    |
|-----------------|--------------|----|
| <i>circST18</i> | miR-5579-5p  | 1  |
| <i>circST18</i> | miR-5581-3p  | 1  |
| <i>circST18</i> | miR-562      | 1  |
| <i>circST18</i> | miR-5697     | 10 |
| <i>circST18</i> | miR-5701     | 2  |
| <i>circST18</i> | miR-5704     | 1  |
| <i>circST18</i> | miR-571      | 3  |
| <i>circST18</i> | miR-574-5p   | 2  |
| <i>circST18</i> | miR-582-3p   | 1  |
| <i>circST18</i> | miR-582-5p   | 2  |
| <i>circST18</i> | miR-598-3p   | 5  |
| <i>circST18</i> | miR-605-3p   | 2  |
| <i>circST18</i> | miR-606      | 2  |
| <i>circST18</i> | miR-616-3p   | 3  |
| <i>circST18</i> | miR-617      | 5  |
| <i>circST18</i> | miR-627-3p   | 3  |
| <i>circST18</i> | miR-632/4288 | 3  |
| <i>circST18</i> | miR-6505-3p  | 5  |
| <i>circST18</i> | miR-6507-5p  | 4  |
| <i>circST18</i> | miR-6509-5p  | 1  |
| <i>circST18</i> | miR-654-3p   | 2  |
| <i>circST18</i> | miR-656-3p   | 1  |
| <i>circST18</i> | miR-6715b-3p | 1  |
| <i>circST18</i> | miR-6717-5p  | 5  |
| <i>circST18</i> | miR-6722-5p  | 1  |
| <i>circST18</i> | miR-6734-5p  | 1  |
| <i>circST18</i> | miR-675-3p   | 2  |
| <i>circST18</i> | miR-676-5p   | 4  |
| <i>circST18</i> | miR-6765-3p  | 1  |
| <i>circST18</i> | miR-6789-5p  | 1  |
| <i>circST18</i> | miR-6790-3p  | 1  |
| <i>circST18</i> | miR-6795-3p  | 1  |
| <i>circST18</i> | miR-6798-3p  | 1  |
| <i>circST18</i> | miR-6812-3p  | 2  |
| <i>circST18</i> | miR-6821-3p  | 1  |
| <i>circST18</i> | miR-6824-5p  | 1  |
| <i>circST18</i> | miR-6826-5p  | 1  |
| <i>circST18</i> | miR-6832-5p  | 2  |

|                    |                     |   |
|--------------------|---------------------|---|
| <i>circST18</i>    | miR-6834-5p         | 1 |
| <i>circST18</i>    | miR-6839-3p         | 1 |
| <i>circST18</i>    | miR-6853-3p         | 3 |
| <i>circST18</i>    | miR-6856-3p         | 1 |
| <i>circST18</i>    | miR-6863            | 5 |
| <i>circST18</i>    | miR-6887-3p         | 1 |
| <i>circST18</i>    | miR-6889-3p         | 5 |
| <i>circST18</i>    | miR-6895-5p         | 1 |
| <i>circST18</i>    | miR-7114-5p         | 1 |
| <i>circST18</i>    | miR-7151-5p         | 2 |
| <i>circST18</i>    | miR-7159-5p         | 1 |
| <i>circST18</i>    | miR-7160-3p         | 1 |
| <i>circST18</i>    | miR-7162-3p         | 1 |
| <i>circST18</i>    | miR-8053            | 5 |
| <i>circST18</i>    | miR-8055            | 1 |
| <i>circST18</i>    | miR-8074            | 1 |
| <i>circST18</i>    | miR-8083            | 5 |
| <i>circST18</i>    | miR-873-5p.2        | 2 |
| <i>circST18</i>    | miR-876-5p          | 4 |
| <i>circST18</i>    | miR-892-5p          | 1 |
| <i>circST18</i>    | miR-892b            | 1 |
| <i>circST18</i>    | miR-1238-5p/4758-5p | 1 |
| <i>circST18</i>    | miR-3651            | 1 |
| <i>circST18</i>    | miR-3943            | 1 |
| <i>circST18</i>    | miR-4323            | 1 |
| <i>circST18</i>    | miR-4658/6790-5p    | 1 |
| <i>circST18</i>    | miR-4711-3p         | 1 |
| <i>circST18</i>    | miR-511-3p          | 1 |
| <i>circST18</i>    | miR-6769a-3p        | 1 |
| <i>circST18</i>    | miR-6821-5p         | 1 |
| <i>circST18</i>    | miR-6831-3p         | 1 |
| <i>circST6GAL2</i> | miR-10-5p           | 1 |
| <i>circST6GAL2</i> | miR-1183            | 1 |
| <i>circST6GAL2</i> | miR-1208            | 1 |
| <i>circST6GAL2</i> | miR-1224-3p         | 2 |
| <i>circST6GAL2</i> | miR-1250-3p         | 2 |
| <i>circST6GAL2</i> | miR-1253            | 2 |
| <i>circST6GAL2</i> | miR-1254/3116       | 5 |

|                    |                    |   |
|--------------------|--------------------|---|
| <i>circST6GAL2</i> | miR-126-5p         | 1 |
| <i>circST6GAL2</i> | miR-1263           | 1 |
| <i>circST6GAL2</i> | miR-1266-3p        | 1 |
| <i>circST6GAL2</i> | miR-1272           | 1 |
| <i>circST6GAL2</i> | miR-1273d          | 2 |
| <i>circST6GAL2</i> | miR-1273g-5p       | 2 |
| <i>circST6GAL2</i> | miR-1276           | 2 |
| <i>circST6GAL2</i> | miR-1279           | 1 |
| <i>circST6GAL2</i> | miR-1302/4298      | 1 |
| <i>circST6GAL2</i> | miR-1322           | 1 |
| <i>circST6GAL2</i> | miR-136-5p         | 3 |
| <i>circST6GAL2</i> | miR-140-5p         | 2 |
| <i>circST6GAL2</i> | miR-141-3p/200-3p  | 1 |
| <i>circST6GAL2</i> | miR-146-5p         | 2 |
| <i>circST6GAL2</i> | miR-150-3p         | 1 |
| <i>circST6GAL2</i> | miR-153-5p         | 2 |
| <i>circST6GAL2</i> | miR-1537-3p        | 1 |
| <i>circST6GAL2</i> | miR-155-3p         | 1 |
| <i>circST6GAL2</i> | miR-181-3p/4420    | 1 |
| <i>circST6GAL2</i> | miR-181-5p         | 1 |
| <i>circST6GAL2</i> | miR-183-5p.1       | 1 |
| <i>circST6GAL2</i> | miR-18a-3p         | 2 |
| <i>circST6GAL2</i> | miR-19-5p          | 1 |
| <i>circST6GAL2</i> | miR-200ab-5p       | 1 |
| <i>circST6GAL2</i> | miR-203a-5p        | 2 |
| <i>circST6GAL2</i> | miR-204-3p/4646-5p | 2 |
| <i>circST6GAL2</i> | miR-2052           | 1 |
| <i>circST6GAL2</i> | miR-2681-5p        | 1 |
| <i>circST6GAL2</i> | miR-26b-3p         | 1 |
| <i>circST6GAL2</i> | miR-29b-2-5p       | 2 |
| <i>circST6GAL2</i> | miR-3122/3913-5p   | 2 |
| <i>circST6GAL2</i> | miR-3123           | 4 |
| <i>circST6GAL2</i> | miR-3145-3p        | 1 |
| <i>circST6GAL2</i> | miR-3145-5p        | 1 |
| <i>circST6GAL2</i> | miR-3147           | 1 |
| <i>circST6GAL2</i> | miR-3157-5p        | 2 |
| <i>circST6GAL2</i> | miR-3163           | 1 |
| <i>circST6GAL2</i> | miR-3182           | 2 |



|                    |                     |   |
|--------------------|---------------------|---|
| <i>circST6GAL2</i> | miR-3189-5p         | 1 |
| <i>circST6GAL2</i> | miR-3192-5p         | 2 |
| <i>circST6GAL2</i> | miR-3194-3p         | 2 |
| <i>circST6GAL2</i> | miR-3201/4791       | 1 |
| <i>circST6GAL2</i> | miR-324-3p/1913     | 2 |
| <i>circST6GAL2</i> | miR-326             | 2 |
| <i>circST6GAL2</i> | miR-340-5p          | 1 |
| <i>circST6GAL2</i> | miR-34a-3p          | 1 |
| <i>circST6GAL2</i> | miR-34b-3p          | 1 |
| <i>circST6GAL2</i> | miR-34c-3p          | 1 |
| <i>circST6GAL2</i> | miR-3613-3p         | 3 |
| <i>circST6GAL2</i> | miR-3617-3p         | 1 |
| <i>circST6GAL2</i> | miR-3649            | 1 |
| <i>circST6GAL2</i> | miR-3664-5p         | 1 |
| <i>circST6GAL2</i> | miR-3919            | 5 |
| <i>circST6GAL2</i> | miR-3920            | 3 |
| <i>circST6GAL2</i> | miR-3925-5p         | 4 |
| <i>circST6GAL2</i> | miR-409-3p          | 1 |
| <i>circST6GAL2</i> | miR-4256            | 1 |
| <i>circST6GAL2</i> | miR-4268            | 4 |
| <i>circST6GAL2</i> | miR-4272            | 1 |
| <i>circST6GAL2</i> | miR-4277            | 1 |
| <i>circST6GAL2</i> | miR-4291            | 2 |
| <i>circST6GAL2</i> | miR-4310/7157-5p    | 2 |
| <i>circST6GAL2</i> | miR-4311            | 2 |
| <i>circST6GAL2</i> | miR-4314            | 1 |
| <i>circST6GAL2</i> | miR-433-3p          | 1 |
| <i>circST6GAL2</i> | miR-4425            | 1 |
| <i>circST6GAL2</i> | miR-4426/4647/4662b | 3 |
| <i>circST6GAL2</i> | miR-4433a-3p        | 2 |
| <i>circST6GAL2</i> | miR-4434/4516/5703  | 2 |
| <i>circST6GAL2</i> | miR-4448            | 4 |
| <i>circST6GAL2</i> | miR-4459            | 2 |
| <i>circST6GAL2</i> | miR-4509            | 1 |
| <i>circST6GAL2</i> | miR-450a-1-3p       | 2 |
| <i>circST6GAL2</i> | miR-450b-3p/769-3p  | 2 |
| <i>circST6GAL2</i> | miR-4528            | 1 |
| <i>circST6GAL2</i> | miR-4645-3p         | 1 |

|                    |                             |   |
|--------------------|-----------------------------|---|
| <i>circST6GAL2</i> | miR-4659a-3p/4659b-3p       | 2 |
| <i>circST6GAL2</i> | miR-4660                    | 3 |
| <i>circST6GAL2</i> | miR-4691-3p                 | 4 |
| <i>circST6GAL2</i> | miR-4699-5p                 | 1 |
| <i>circST6GAL2</i> | miR-4704-5p                 | 1 |
| <i>circST6GAL2</i> | miR-4712-3p                 | 1 |
| <i>circST6GAL2</i> | miR-4714-3p                 | 1 |
| <i>circST6GAL2</i> | miR-4714-5p                 | 1 |
| <i>circST6GAL2</i> | miR-4722-3p/6727-3p         | 4 |
| <i>circST6GAL2</i> | miR-4725-5p                 | 1 |
| <i>circST6GAL2</i> | miR-4742-3p                 | 1 |
| <i>circST6GAL2</i> | miR-4744                    | 1 |
| <i>circST6GAL2</i> | miR-4750-3p                 | 4 |
| <i>circST6GAL2</i> | miR-4756-3p                 | 5 |
| <i>circST6GAL2</i> | miR-4758-3p                 | 1 |
| <i>circST6GAL2</i> | miR-4762-3p                 | 1 |
| <i>circST6GAL2</i> | miR-4762-5p                 | 2 |
| <i>circST6GAL2</i> | miR-4764-3p                 | 1 |
| <i>circST6GAL2</i> | miR-4768-3p                 | 2 |
| <i>circST6GAL2</i> | miR-4773                    | 2 |
| <i>circST6GAL2</i> | miR-4778-5p                 | 3 |
| <i>circST6GAL2</i> | miR-4781-3p                 | 1 |
| <i>circST6GAL2</i> | miR-4793-5p                 | 2 |
| <i>circST6GAL2</i> | miR-4795-3p                 | 1 |
| <i>circST6GAL2</i> | miR-483-3p.2                | 1 |
| <i>circST6GAL2</i> | miR-487a-5p/487b-5p         | 2 |
| <i>circST6GAL2</i> | miR-490-3p                  | 2 |
| <i>circST6GAL2</i> | miR-497-3p                  | 1 |
| <i>circST6GAL2</i> | miR-5000-5p                 | 2 |
| <i>circST6GAL2</i> | miR-5002-5p                 | 1 |
| <i>circST6GAL2</i> | miR-5009-3p                 | 1 |
| <i>circST6GAL2</i> | miR-5011-5p                 | 1 |
| <i>circST6GAL2</i> | miR-504-5p.1                | 1 |
| <i>circST6GAL2</i> | miR-506-5p                  | 2 |
| <i>circST6GAL2</i> | miR-508-5p                  | 1 |
| <i>circST6GAL2</i> | miR-5089-5p                 | 2 |
| <i>circST6GAL2</i> | miR-513a-3p/513c-3p/3606-3p | 1 |
| <i>circST6GAL2</i> | miR-514a-3p                 | 1 |

|                    |                                                                  |   |
|--------------------|------------------------------------------------------------------|---|
| <i>circST6GAL2</i> | miR-514a-5p                                                      | 1 |
| <i>circST6GAL2</i> | miR-5186                                                         | 1 |
| <i>circST6GAL2</i> | miR-518c-5p                                                      | 2 |
| <i>circST6GAL2</i> | miR-5196-3p                                                      | 2 |
| <i>circST6GAL2</i> | miR-5197-3p                                                      | 2 |
| <i>circST6GAL2</i> | miR-524-5p                                                       | 1 |
| <i>circST6GAL2</i> | miR-539-5p                                                       | 3 |
| <i>circST6GAL2</i> | miR-548ac/548bb-3p/548d-3p/548h-3p/548z                          |   |
| <i>circST6GAL2</i> | miR-548ap-3p/548aa/548t-3p                                       | 2 |
| <i>circST6GAL2</i> | miR-548aq-3p/548am-3p/548aj-3p/548ah-3p/548ae-3p/548j-3p/548x-3p |   |
| <i>circST6GAL2</i> | miR-548as-3p                                                     | 2 |
| <i>circST6GAL2</i> | miR-548ay-3p/548at-3p                                            | 2 |
| <i>circST6GAL2</i> | miR-548g-3p                                                      | 3 |
| <i>circST6GAL2</i> | miR-548u/7161-5p                                                 | 1 |
| <i>circST6GAL2</i> | miR-551b-5p                                                      | 1 |
| <i>circST6GAL2</i> | miR-552-5p                                                       | 1 |
| <i>circST6GAL2</i> | miR-5586-5p                                                      | 2 |
| <i>circST6GAL2</i> | miR-568                                                          | 1 |
| <i>circST6GAL2</i> | miR-5696                                                         | 2 |
| <i>circST6GAL2</i> | miR-5699-5p                                                      | 1 |
| <i>circST6GAL2</i> | miR-576-3p                                                       | 3 |
| <i>circST6GAL2</i> | miR-579-3p                                                       | 2 |
| <i>circST6GAL2</i> | miR-580-3p                                                       | 1 |
| <i>circST6GAL2</i> | miR-582-3p                                                       | 1 |
| <i>circST6GAL2</i> | miR-583                                                          | 2 |
| <i>circST6GAL2</i> | miR-589-5p                                                       | 2 |
| <i>circST6GAL2</i> | miR-598-3p                                                       | 1 |
| <i>circST6GAL2</i> | miR-6071                                                         | 3 |
| <i>circST6GAL2</i> | miR-6074                                                         | 4 |
| <i>circST6GAL2</i> | miR-6083                                                         | 1 |
| <i>circST6GAL2</i> | miR-616-3p                                                       | 1 |
| <i>circST6GAL2</i> | miR-618                                                          | 2 |
| <i>circST6GAL2</i> | miR-619-5p/6506-5p                                               | 2 |
| <i>circST6GAL2</i> | miR-649                                                          | 2 |
| <i>circST6GAL2</i> | miR-6504-3p                                                      | 2 |
| <i>circST6GAL2</i> | miR-6513-5p                                                      | 2 |
| <i>circST6GAL2</i> | miR-652-5p                                                       | 3 |
| <i>circST6GAL2</i> | miR-653-3p                                                       | 1 |

|                    |                     |   |
|--------------------|---------------------|---|
| <i>circST6GAL2</i> | miR-656-3p          | 1 |
| <i>circST6GAL2</i> | miR-661             | 5 |
| <i>circST6GAL2</i> | miR-663b            | 1 |
| <i>circST6GAL2</i> | miR-6715a-3p        | 1 |
| <i>circST6GAL2</i> | miR-6716-5p         | 1 |
| <i>circST6GAL2</i> | miR-6728-3p         | 2 |
| <i>circST6GAL2</i> | miR-6728-5p         | 2 |
| <i>circST6GAL2</i> | miR-6735-3p         | 4 |
| <i>circST6GAL2</i> | miR-6736-3p         | 3 |
| <i>circST6GAL2</i> | miR-6742-3p         | 2 |
| <i>circST6GAL2</i> | miR-6747-3p         | 4 |
| <i>circST6GAL2</i> | miR-6752-3p         | 1 |
| <i>circST6GAL2</i> | miR-676-5p          | 2 |
| <i>circST6GAL2</i> | miR-6760-3p         | 1 |
| <i>circST6GAL2</i> | miR-6764-3p/6824-3p | 2 |
| <i>circST6GAL2</i> | miR-6767-3p         | 2 |
| <i>circST6GAL2</i> | miR-6770-5p         | 2 |
| <i>circST6GAL2</i> | miR-6771-3p         | 2 |
| <i>circST6GAL2</i> | miR-6772-3p         | 2 |
| <i>circST6GAL2</i> | miR-6776-3p         | 3 |
| <i>circST6GAL2</i> | miR-6794-3p         | 1 |
| <i>circST6GAL2</i> | miR-6827-5p         | 1 |
| <i>circST6GAL2</i> | miR-6828-3p         | 3 |
| <i>circST6GAL2</i> | miR-6849-3p         | 3 |
| <i>circST6GAL2</i> | miR-6852-5p         | 2 |
| <i>circST6GAL2</i> | miR-6863            | 1 |
| <i>circST6GAL2</i> | miR-6875-3p         | 2 |
| <i>circST6GAL2</i> | miR-6878-3p         | 1 |
| <i>circST6GAL2</i> | miR-6884-3p         | 2 |
| <i>circST6GAL2</i> | miR-6888-5p         | 1 |
| <i>circST6GAL2</i> | miR-711             | 1 |
| <i>circST6GAL2</i> | miR-7150            | 3 |
| <i>circST6GAL2</i> | miR-7154-5p         | 1 |
| <i>circST6GAL2</i> | miR-718             | 2 |
| <i>circST6GAL2</i> | miR-767-3p          | 2 |
| <i>circST6GAL2</i> | miR-8055            | 1 |
| <i>circST6GAL2</i> | miR-8074            | 1 |
| <i>circST6GAL2</i> | miR-8076            | 1 |

|                    |                          |   |
|--------------------|--------------------------|---|
| <i>circST6GAL2</i> | miR-885-3p               | 3 |
| <i>circST6GAL2</i> | miR-887-5p               | 2 |
| <i>circST6GAL2</i> | miR-892-5p               | 2 |
| <i>circST6GAL2</i> | miR-892b                 | 2 |
| <i>circST6GAL2</i> | miR-939-3p               | 2 |
| <i>circST6GAL2</i> | miR-942-3p               | 1 |
| <i>circST6GAL2</i> | let-7i-3p                | 1 |
| <i>circST6GAL2</i> | miR-101-3p.2             | 1 |
| <i>circST6GAL2</i> | miR-103-3p/107           | 1 |
| <i>circST6GAL2</i> | miR-10a-3p               | 1 |
| <i>circST6GAL2</i> | miR-1179                 | 1 |
| <i>circST6GAL2</i> | miR-1180-3p              | 1 |
| <i>circST6GAL2</i> | miR-1184                 | 3 |
| <i>circST6GAL2</i> | miR-1185-5p              | 1 |
| <i>circST6GAL2</i> | miR-1199-3p              | 1 |
| <i>circST6GAL2</i> | miR-1199-5p/6751-3p      | 3 |
| <i>circST6GAL2</i> | miR-1202/3972            | 1 |
| <i>circST6GAL2</i> | miR-1203                 | 2 |
| <i>circST6GAL2</i> | miR-1205                 | 3 |
| <i>circST6GAL2</i> | miR-1206                 | 2 |
| <i>circST6GAL2</i> | miR-1207-3p              | 5 |
| <i>circST6GAL2</i> | miR-1207-5p/4763-3p      | 1 |
| <i>circST6GAL2</i> | miR-1225-3p              | 3 |
| <i>circST6GAL2</i> | miR-1226-3p              | 2 |
| <i>circST6GAL2</i> | miR-1227-3p              | 1 |
| <i>circST6GAL2</i> | miR-1228-5p              | 1 |
| <i>circST6GAL2</i> | miR-1229-3p              | 2 |
| <i>circST6GAL2</i> | miR-1231                 | 1 |
| <i>circST6GAL2</i> | miR-1233-3p              | 2 |
| <i>circST6GAL2</i> | miR-1234-3p/7107-5p      | 1 |
| <i>circST6GAL2</i> | miR-1236-3p              | 2 |
| <i>circST6GAL2</i> | miR-1237-3p              | 1 |
| <i>circST6GAL2</i> | miR-1237-5p/4488/4697-5p | 4 |
| <i>circST6GAL2</i> | miR-124-3p.2/506-3p      | 1 |
| <i>circST6GAL2</i> | miR-1247-3p              | 1 |
| <i>circST6GAL2</i> | miR-1248                 | 1 |
| <i>circST6GAL2</i> | miR-1249-3p              | 1 |
| <i>circST6GAL2</i> | miR-1249-5p/6797-5p      | 2 |

|                    |                    |   |
|--------------------|--------------------|---|
| <i>circST6GAL2</i> | miR-125-5p         | 1 |
| <i>circST6GAL2</i> | miR-1250-5p        | 1 |
| <i>circST6GAL2</i> | miR-1251-3p        | 1 |
| <i>circST6GAL2</i> | miR-1252-5p        | 2 |
| <i>circST6GAL2</i> | miR-1255a/1255b-5p | 1 |
| <i>circST6GAL2</i> | miR-1256           | 1 |
| <i>circST6GAL2</i> | miR-125a-3p        | 1 |
| <i>circST6GAL2</i> | miR-126-3p.2       | 1 |
| <i>circST6GAL2</i> | miR-1265           | 1 |
| <i>circST6GAL2</i> | miR-1266-5p/4518   | 2 |
| <i>circST6GAL2</i> | miR-127-5p         | 3 |
| <i>circST6GAL2</i> | miR-1270           | 4 |
| <i>circST6GAL2</i> | miR-1273a          | 2 |
| <i>circST6GAL2</i> | miR-1273c          | 1 |
| <i>circST6GAL2</i> | miR-1273f          | 1 |
| <i>circST6GAL2</i> | miR-1273h-3p       | 4 |
| <i>circST6GAL2</i> | miR-1275/4665-5p   | 3 |
| <i>circST6GAL2</i> | miR-128-1-5p       | 2 |
| <i>circST6GAL2</i> | miR-1284           | 3 |
| <i>circST6GAL2</i> | miR-1285-5p        | 3 |
| <i>circST6GAL2</i> | miR-1287-5p        | 1 |
| <i>circST6GAL2</i> | miR-1288-3p        | 1 |
| <i>circST6GAL2</i> | miR-1288-5p        | 1 |
| <i>circST6GAL2</i> | miR-129-3p         | 4 |
| <i>circST6GAL2</i> | miR-129-5p         | 3 |
| <i>circST6GAL2</i> | miR-1292-3p        | 2 |
| <i>circST6GAL2</i> | miR-1292-5p        | 1 |
| <i>circST6GAL2</i> | miR-1293/4483      | 1 |
| <i>circST6GAL2</i> | miR-1295b-5p/1912  | 2 |
| <i>circST6GAL2</i> | miR-1298-5p        | 2 |
| <i>circST6GAL2</i> | miR-1299           | 1 |
| <i>circST6GAL2</i> | miR-130b-5p        | 2 |
| <i>circST6GAL2</i> | miR-133a-5p        | 2 |
| <i>circST6GAL2</i> | miR-1343-3p        | 1 |
| <i>circST6GAL2</i> | miR-137            | 1 |
| <i>circST6GAL2</i> | miR-138-5p         | 2 |
| <i>circST6GAL2</i> | miR-140-3p.2       | 2 |
| <i>circST6GAL2</i> | miR-141-5p         | 2 |

|                    |                                      |   |
|--------------------|--------------------------------------|---|
| <i>circST6GAL2</i> | miR-142-3p.2                         | 1 |
| <i>circST6GAL2</i> | miR-143-3p                           | 1 |
| <i>circST6GAL2</i> | miR-145-3p                           | 2 |
| <i>circST6GAL2</i> | miR-145-5p                           | 1 |
| <i>circST6GAL2</i> | miR-146b-3p                          | 1 |
| <i>circST6GAL2</i> | miR-1470                             | 1 |
| <i>circST6GAL2</i> | miR-1471                             | 3 |
| <i>circST6GAL2</i> | miR-147a                             | 1 |
| <i>circST6GAL2</i> | miR-149-3p/4728-5p/6785-5p/6883-5p   | 2 |
| <i>circST6GAL2</i> | miR-149-5p                           | 2 |
| <i>circST6GAL2</i> | miR-15-5p/16-5p/195-5p/424-5p/497-5p | 3 |
| <i>circST6GAL2</i> | miR-1537-5p                          | 1 |
| <i>circST6GAL2</i> | miR-1539                             | 1 |
| <i>circST6GAL2</i> | miR-155-5p                           | 1 |
| <i>circST6GAL2</i> | miR-1587/3620-5p                     | 1 |
| <i>circST6GAL2</i> | miR-15a-3p                           | 1 |
| <i>circST6GAL2</i> | miR-16-1-3p                          | 1 |
| <i>circST6GAL2</i> | miR-17-3p                            | 3 |
| <i>circST6GAL2</i> | miR-17-5p/20-5p/93-5p/106-5p/519-3p  | 1 |
| <i>circST6GAL2</i> | miR-18-5p                            | 2 |
| <i>circST6GAL2</i> | miR-181a-3p                          | 1 |
| <i>circST6GAL2</i> | miR-1827                             | 2 |
| <i>circST6GAL2</i> | miR-183-5p.2                         | 1 |
| <i>circST6GAL2</i> | miR-184                              | 1 |
| <i>circST6GAL2</i> | miR-1908-5p                          | 1 |
| <i>circST6GAL2</i> | miR-1909-3p/6722-3p                  | 3 |
| <i>circST6GAL2</i> | miR-191-3p                           | 3 |
| <i>circST6GAL2</i> | miR-1910-3p/6511a-5p                 | 1 |
| <i>circST6GAL2</i> | miR-1910-5p                          | 1 |
| <i>circST6GAL2</i> | miR-1911-3p                          | 2 |
| <i>circST6GAL2</i> | miR-1915-3p/6764-5p                  | 1 |
| <i>circST6GAL2</i> | miR-1915-5p                          | 2 |
| <i>circST6GAL2</i> | miR-193-3p                           | 1 |
| <i>circST6GAL2</i> | miR-193b-5p                          | 1 |
| <i>circST6GAL2</i> | miR-196b-3p                          | 2 |
| <i>circST6GAL2</i> | miR-1972                             | 1 |
| <i>circST6GAL2</i> | miR-1973                             | 1 |
| <i>circST6GAL2</i> | miR-1976                             | 1 |

|                    |                                 |   |
|--------------------|---------------------------------|---|
| <i>circST6GAL2</i> | miR-198                         | 2 |
| <i>circST6GAL2</i> | miR-203a-3p.1                   | 1 |
| <i>circST6GAL2</i> | miR-204-5p/211-5p               | 1 |
| <i>circST6GAL2</i> | miR-208-3p                      | 2 |
| <i>circST6GAL2</i> | miR-208-5p                      | 1 |
| <i>circST6GAL2</i> | miR-20a-3p                      | 2 |
| <i>circST6GAL2</i> | miR-210-5p                      | 1 |
| <i>circST6GAL2</i> | miR-2110                        | 1 |
| <i>circST6GAL2</i> | miR-2114-3p                     | 1 |
| <i>circST6GAL2</i> | miR-2114-5p                     | 1 |
| <i>circST6GAL2</i> | miR-2115-5p                     | 1 |
| <i>circST6GAL2</i> | miR-212-5p                      | 1 |
| <i>circST6GAL2</i> | miR-214-3p/3619-5p              | 2 |
| <i>circST6GAL2</i> | miR-214-5p                      | 1 |
| <i>circST6GAL2</i> | miR-215-3p                      | 1 |
| <i>circST6GAL2</i> | miR-216a-5p                     | 2 |
| <i>circST6GAL2</i> | miR-216b-5p                     | 2 |
| <i>circST6GAL2</i> | miR-22-3p                       | 4 |
| <i>circST6GAL2</i> | miR-221-5p/8073                 | 1 |
| <i>circST6GAL2</i> | miR-223-5p                      | 1 |
| <i>circST6GAL2</i> | miR-224-5p                      | 1 |
| <i>circST6GAL2</i> | miR-2276-5p                     | 1 |
| <i>circST6GAL2</i> | miR-2277-3p                     | 2 |
| <i>circST6GAL2</i> | miR-23-5p                       | 1 |
| <i>circST6GAL2</i> | miR-2467-3p                     | 3 |
| <i>circST6GAL2</i> | miR-2467-5p                     | 2 |
| <i>circST6GAL2</i> | miR-26-5p                       | 2 |
| <i>circST6GAL2</i> | miR-2681-3p                     | 1 |
| <i>circST6GAL2</i> | miR-27a-5p                      | 1 |
| <i>circST6GAL2</i> | miR-28-5p/708-5p                | 1 |
| <i>circST6GAL2</i> | miR-2861                        | 3 |
| <i>circST6GAL2</i> | miR-29-3p                       | 2 |
| <i>circST6GAL2</i> | miR-296-5p                      | 1 |
| <i>circST6GAL2</i> | miR-298                         | 5 |
| <i>circST6GAL2</i> | miR-29a-5p                      | 2 |
| <i>circST6GAL2</i> | miR-29b-1-5p                    | 1 |
| <i>circST6GAL2</i> | miR-302-3p/372-3p/373-3p/520-3p | 1 |
| <i>circST6GAL2</i> | miR-302c-3p.2/520-3p            | 1 |



|                    |                       |   |
|--------------------|-----------------------|---|
| <i>circST6GAL2</i> | miR-3064-3p           | 1 |
| <i>circST6GAL2</i> | miR-3064-5p           | 2 |
| <i>circST6GAL2</i> | miR-3065-3p           | 2 |
| <i>circST6GAL2</i> | miR-3065-5p           | 1 |
| <i>circST6GAL2</i> | miR-3074-5p           | 2 |
| <i>circST6GAL2</i> | miR-31-3p             | 1 |
| <i>circST6GAL2</i> | miR-31-5p             | 1 |
| <i>circST6GAL2</i> | miR-3119              | 3 |
| <i>circST6GAL2</i> | miR-3120-3p           | 2 |
| <i>circST6GAL2</i> | miR-3125/3916/6859-5p | 1 |
| <i>circST6GAL2</i> | miR-3127-5p           | 3 |
| <i>circST6GAL2</i> | miR-3128              | 2 |
| <i>circST6GAL2</i> | miR-3130-3p           | 2 |
| <i>circST6GAL2</i> | miR-3130-5p/4482-5p   | 2 |
| <i>circST6GAL2</i> | miR-3135b             | 1 |
| <i>circST6GAL2</i> | miR-3136-3p/7155-3p   | 2 |
| <i>circST6GAL2</i> | miR-3140-3p           | 3 |
| <i>circST6GAL2</i> | miR-3141              | 1 |
| <i>circST6GAL2</i> | miR-3144-5p           | 1 |
| <i>circST6GAL2</i> | miR-3150a-3p          | 1 |
| <i>circST6GAL2</i> | miR-3150b-3p          | 2 |
| <i>circST6GAL2</i> | miR-3151-5p           | 1 |
| <i>circST6GAL2</i> | miR-3154              | 2 |
| <i>circST6GAL2</i> | miR-3158-3p           | 2 |
| <i>circST6GAL2</i> | miR-3158-5p           | 3 |
| <i>circST6GAL2</i> | miR-3159              | 1 |
| <i>circST6GAL2</i> | miR-3160-5p           | 4 |
| <i>circST6GAL2</i> | miR-3169              | 1 |
| <i>circST6GAL2</i> | miR-3171              | 2 |
| <i>circST6GAL2</i> | miR-3173-3p/6891-5p   | 1 |
| <i>circST6GAL2</i> | miR-3173-5p           | 1 |
| <i>circST6GAL2</i> | miR-3174              | 1 |
| <i>circST6GAL2</i> | miR-3175              | 2 |
| <i>circST6GAL2</i> | miR-3177-3p           | 2 |
| <i>circST6GAL2</i> | miR-3178              | 1 |
| <i>circST6GAL2</i> | miR-3179              | 1 |
| <i>circST6GAL2</i> | miR-3180-5p           | 1 |
| <i>circST6GAL2</i> | miR-3181              | 1 |

|                    |                           |   |
|--------------------|---------------------------|---|
| <i>circST6GAL2</i> | miR-3183/4723-3p/6769b-3p | 1 |
| <i>circST6GAL2</i> | miR-3185                  | 1 |
| <i>circST6GAL2</i> | miR-3188                  | 2 |
| <i>circST6GAL2</i> | miR-3189-3p               | 1 |
| <i>circST6GAL2</i> | miR-3191-3p               | 1 |
| <i>circST6GAL2</i> | miR-3191-5p               | 1 |
| <i>circST6GAL2</i> | miR-3193                  | 1 |
| <i>circST6GAL2</i> | miR-3194-5p               | 2 |
| <i>circST6GAL2</i> | miR-3195                  | 1 |
| <i>circST6GAL2</i> | miR-3197                  | 2 |
| <i>circST6GAL2</i> | miR-3202                  | 1 |
| <i>circST6GAL2</i> | miR-323-3p                | 1 |
| <i>circST6GAL2</i> | miR-323a-5p               | 2 |
| <i>circST6GAL2</i> | miR-33-5p                 | 3 |
| <i>circST6GAL2</i> | miR-330-3p.2              | 2 |
| <i>circST6GAL2</i> | miR-331-3p                | 1 |
| <i>circST6GAL2</i> | miR-335-3p                | 4 |
| <i>circST6GAL2</i> | miR-338-3p                | 3 |
| <i>circST6GAL2</i> | miR-342-3p                | 1 |
| <i>circST6GAL2</i> | miR-342-5p/4664-5p        | 1 |
| <i>circST6GAL2</i> | miR-345-5p                | 3 |
| <i>circST6GAL2</i> | miR-346                   | 1 |
| <i>circST6GAL2</i> | miR-34b-5p/449c-5p        | 1 |
| <i>circST6GAL2</i> | miR-3605-5p               | 1 |
| <i>circST6GAL2</i> | miR-3612                  | 4 |
| <i>circST6GAL2</i> | miR-3614-5p               | 2 |
| <i>circST6GAL2</i> | miR-3616-3p               | 1 |
| <i>circST6GAL2</i> | miR-3621                  | 1 |
| <i>circST6GAL2</i> | miR-3622a-5p              | 1 |
| <i>circST6GAL2</i> | miR-3622b-5p              | 1 |
| <i>circST6GAL2</i> | miR-363-5p/6745           | 1 |
| <i>circST6GAL2</i> | miR-3648                  | 1 |
| <i>circST6GAL2</i> | miR-3650                  | 1 |
| <i>circST6GAL2</i> | miR-3652/4430             | 2 |
| <i>circST6GAL2</i> | miR-3653-5p               | 1 |
| <i>circST6GAL2</i> | miR-3656                  | 1 |
| <i>circST6GAL2</i> | miR-3658                  | 2 |
| <i>circST6GAL2</i> | miR-3662                  | 1 |

|                    |                           |   |
|--------------------|---------------------------|---|
| <i>circST6GAL2</i> | miR-3663-5p               | 1 |
| <i>circST6GAL2</i> | miR-3664-3p               | 2 |
| <i>circST6GAL2</i> | miR-3665                  | 1 |
| <i>circST6GAL2</i> | miR-3667-3p               | 4 |
| <i>circST6GAL2</i> | miR-3668                  | 1 |
| <i>circST6GAL2</i> | miR-3675-3p               | 1 |
| <i>circST6GAL2</i> | miR-3678-3p               | 4 |
| <i>circST6GAL2</i> | miR-3679-3p               | 1 |
| <i>circST6GAL2</i> | miR-3682-5p               | 2 |
| <i>circST6GAL2</i> | miR-3683                  | 1 |
| <i>circST6GAL2</i> | miR-3688-5p               | 2 |
| <i>circST6GAL2</i> | miR-3690                  | 3 |
| <i>circST6GAL2</i> | miR-3692-5p               | 2 |
| <i>circST6GAL2</i> | miR-371-5p                | 1 |
| <i>circST6GAL2</i> | miR-371b-5p/373-5p/616-5p | 1 |
| <i>circST6GAL2</i> | miR-372-5p                | 1 |
| <i>circST6GAL2</i> | miR-375                   | 1 |
| <i>circST6GAL2</i> | miR-376-3p                | 1 |
| <i>circST6GAL2</i> | miR-376a-2-5p             | 1 |
| <i>circST6GAL2</i> | miR-376a-5p               | 1 |
| <i>circST6GAL2</i> | miR-377-3p                | 1 |
| <i>circST6GAL2</i> | miR-378-3p                | 2 |
| <i>circST6GAL2</i> | miR-378g                  | 1 |
| <i>circST6GAL2</i> | miR-380-3p                | 1 |
| <i>circST6GAL2</i> | miR-382-3p                | 1 |
| <i>circST6GAL2</i> | miR-382-5p                | 1 |
| <i>circST6GAL2</i> | miR-383-3p                | 2 |
| <i>circST6GAL2</i> | miR-3907                  | 2 |
| <i>circST6GAL2</i> | miR-3908                  | 2 |
| <i>circST6GAL2</i> | miR-3911                  | 1 |
| <i>circST6GAL2</i> | miR-3912-5p               | 1 |
| <i>circST6GAL2</i> | miR-3918                  | 4 |
| <i>circST6GAL2</i> | miR-3924                  | 1 |
| <i>circST6GAL2</i> | miR-3925-3p               | 1 |
| <i>circST6GAL2</i> | miR-3928-5p/6806-3p       | 1 |
| <i>circST6GAL2</i> | miR-3929/4419b/4478       | 2 |
| <i>circST6GAL2</i> | miR-3934-3p               | 1 |
| <i>circST6GAL2</i> | miR-3934-5p               | 1 |

|                    |                           |   |
|--------------------|---------------------------|---|
| <i>circST6GAL2</i> | miR-3935                  | 1 |
| <i>circST6GAL2</i> | miR-3936                  | 1 |
| <i>circST6GAL2</i> | miR-3937                  | 2 |
| <i>circST6GAL2</i> | miR-3938                  | 1 |
| <i>circST6GAL2</i> | miR-3940-5p/4507          | 1 |
| <i>circST6GAL2</i> | miR-3942-3p               | 1 |
| <i>circST6GAL2</i> | miR-3942-5p               | 2 |
| <i>circST6GAL2</i> | miR-3944-3p               | 1 |
| <i>circST6GAL2</i> | miR-3944-5p               | 1 |
| <i>circST6GAL2</i> | miR-3945                  | 1 |
| <i>circST6GAL2</i> | miR-3960/8072             | 1 |
| <i>circST6GAL2</i> | miR-3973                  | 1 |
| <i>circST6GAL2</i> | miR-3975                  | 2 |
| <i>circST6GAL2</i> | miR-411-3p                | 1 |
| <i>circST6GAL2</i> | miR-412-3p/6754-3p        | 2 |
| <i>circST6GAL2</i> | miR-421                   | 1 |
| <i>circST6GAL2</i> | miR-423-5p                | 1 |
| <i>circST6GAL2</i> | miR-4253/6862-5p          | 1 |
| <i>circST6GAL2</i> | miR-4254                  | 3 |
| <i>circST6GAL2</i> | miR-4257                  | 1 |
| <i>circST6GAL2</i> | miR-4258                  | 2 |
| <i>circST6GAL2</i> | miR-4260                  | 2 |
| <i>circST6GAL2</i> | miR-4267                  | 3 |
| <i>circST6GAL2</i> | miR-4271/4725-3p/6780b-5p | 2 |
| <i>circST6GAL2</i> | miR-4274                  | 1 |
| <i>circST6GAL2</i> | miR-4279                  | 1 |
| <i>circST6GAL2</i> | miR-4283                  | 4 |
| <i>circST6GAL2</i> | miR-4285                  | 1 |
| <i>circST6GAL2</i> | miR-4287/4685-3p          | 2 |
| <i>circST6GAL2</i> | miR-4290                  | 1 |
| <i>circST6GAL2</i> | miR-4292/6791-5p          | 1 |
| <i>circST6GAL2</i> | miR-4293                  | 1 |
| <i>circST6GAL2</i> | miR-4297/5581-5p          | 1 |
| <i>circST6GAL2</i> | miR-4299                  | 2 |
| <i>circST6GAL2</i> | miR-4308                  | 1 |
| <i>circST6GAL2</i> | miR-4320                  | 1 |
| <i>circST6GAL2</i> | miR-4324                  | 1 |
| <i>circST6GAL2</i> | miR-4326                  | 1 |

|                    |                                              |   |
|--------------------|----------------------------------------------|---|
| <i>circST6GAL2</i> | miR-433-5p                                   | 1 |
| <i>circST6GAL2</i> | miR-4422                                     | 2 |
| <i>circST6GAL2</i> | miR-4428                                     | 1 |
| <i>circST6GAL2</i> | miR-4433a-5p                                 | 1 |
| <i>circST6GAL2</i> | miR-4436b-3p/4632-5p/6735-5p/6879-5p/7843-5p |   |
| <i>circST6GAL2</i> | miR-4437                                     | 2 |
| <i>circST6GAL2</i> | miR-4438                                     | 1 |
| <i>circST6GAL2</i> | miR-4443                                     | 1 |
| <i>circST6GAL2</i> | miR-4446-3p                                  | 2 |
| <i>circST6GAL2</i> | miR-4447/4472                                | 1 |
| <i>circST6GAL2</i> | miR-4456                                     | 2 |
| <i>circST6GAL2</i> | miR-4457                                     | 2 |
| <i>circST6GAL2</i> | miR-4467                                     | 1 |
| <i>circST6GAL2</i> | miR-4468                                     | 1 |
| <i>circST6GAL2</i> | miR-4469                                     | 2 |
| <i>circST6GAL2</i> | miR-4471/8059                                | 1 |
| <i>circST6GAL2</i> | miR-4477b                                    | 2 |
| <i>circST6GAL2</i> | miR-4485-5p                                  | 1 |
| <i>circST6GAL2</i> | miR-4486                                     | 1 |
| <i>circST6GAL2</i> | miR-4489                                     | 4 |
| <i>circST6GAL2</i> | miR-4493                                     | 1 |
| <i>circST6GAL2</i> | miR-4495                                     | 1 |
| <i>circST6GAL2</i> | miR-4503                                     | 2 |
| <i>circST6GAL2</i> | miR-4505/5787                                | 2 |
| <i>circST6GAL2</i> | miR-4506                                     | 1 |
| <i>circST6GAL2</i> | miR-4508                                     | 1 |
| <i>circST6GAL2</i> | miR-450a-2-3p                                | 2 |
| <i>circST6GAL2</i> | miR-4512                                     | 1 |
| <i>circST6GAL2</i> | miR-4515                                     | 1 |
| <i>circST6GAL2</i> | miR-4519                                     | 1 |
| <i>circST6GAL2</i> | miR-451b                                     | 1 |
| <i>circST6GAL2</i> | miR-452-3p                                   | 2 |
| <i>circST6GAL2</i> | miR-4520-5p                                  | 1 |
| <i>circST6GAL2</i> | miR-4523                                     | 1 |
| <i>circST6GAL2</i> | miR-4524a-3p                                 | 2 |
| <i>circST6GAL2</i> | miR-4527/6503-5p                             | 1 |
| <i>circST6GAL2</i> | miR-4529-5p                                  | 1 |
| <i>circST6GAL2</i> | miR-4530                                     | 3 |

|                    |                          |   |
|--------------------|--------------------------|---|
| <i>circST6GAL2</i> | miR-4531                 | 4 |
| <i>circST6GAL2</i> | miR-4532                 | 1 |
| <i>circST6GAL2</i> | miR-4533                 | 1 |
| <i>circST6GAL2</i> | miR-4537                 | 1 |
| <i>circST6GAL2</i> | miR-4539                 | 1 |
| <i>circST6GAL2</i> | miR-455-3p.1             | 1 |
| <i>circST6GAL2</i> | miR-4635                 | 2 |
| <i>circST6GAL2</i> | miR-4638-3p              | 2 |
| <i>circST6GAL2</i> | miR-4639-5p              | 1 |
| <i>circST6GAL2</i> | miR-4640-3p              | 1 |
| <i>circST6GAL2</i> | miR-4640-5p              | 1 |
| <i>circST6GAL2</i> | miR-4642                 | 1 |
| <i>circST6GAL2</i> | miR-4645-5p/4673         | 2 |
| <i>circST6GAL2</i> | miR-4649-5p/6729-5p      | 1 |
| <i>circST6GAL2</i> | miR-4650-5p              | 1 |
| <i>circST6GAL2</i> | miR-4652-5p              | 1 |
| <i>circST6GAL2</i> | miR-4656                 | 5 |
| <i>circST6GAL2</i> | miR-4659a-5p/4659b-5p    | 3 |
| <i>circST6GAL2</i> | miR-466                  | 1 |
| <i>circST6GAL2</i> | miR-4663                 | 2 |
| <i>circST6GAL2</i> | miR-4664-3p              | 1 |
| <i>circST6GAL2</i> | miR-4666a-5p             | 1 |
| <i>circST6GAL2</i> | miR-4667-3p              | 1 |
| <i>circST6GAL2</i> | miR-4667-5p/4700-5p/8089 | 1 |
| <i>circST6GAL2</i> | miR-4668-3p              | 1 |
| <i>circST6GAL2</i> | miR-4674                 | 1 |
| <i>circST6GAL2</i> | miR-4675/4741            | 5 |
| <i>circST6GAL2</i> | miR-4681                 | 1 |
| <i>circST6GAL2</i> | miR-4684-3p              | 1 |
| <i>circST6GAL2</i> | miR-4685-5p/6837-5p      | 2 |
| <i>circST6GAL2</i> | miR-4686                 | 3 |
| <i>circST6GAL2</i> | miR-4687-3p              | 2 |
| <i>circST6GAL2</i> | miR-4687-5p              | 4 |
| <i>circST6GAL2</i> | miR-4688/6743-5p         | 1 |
| <i>circST6GAL2</i> | miR-4690-3p/5685         | 3 |
| <i>circST6GAL2</i> | miR-4690-5p              | 1 |
| <i>circST6GAL2</i> | miR-4691-5p/6792-3p      | 1 |
| <i>circST6GAL2</i> | miR-4694-3p              | 1 |

|                    |                             |   |
|--------------------|-----------------------------|---|
| <i>circST6GAL2</i> | miR-4695-3p                 | 1 |
| <i>circST6GAL2</i> | miR-4695-5p                 | 3 |
| <i>circST6GAL2</i> | miR-4698                    | 1 |
| <i>circST6GAL2</i> | miR-4699-3p                 | 1 |
| <i>circST6GAL2</i> | miR-4706/4749-5p            | 1 |
| <i>circST6GAL2</i> | miR-4707-3p                 | 1 |
| <i>circST6GAL2</i> | miR-4707-5p                 | 1 |
| <i>circST6GAL2</i> | miR-4708-5p                 | 1 |
| <i>circST6GAL2</i> | miR-4709-3p                 | 1 |
| <i>circST6GAL2</i> | miR-4711-3p                 | 1 |
| <i>circST6GAL2</i> | miR-4711-5p                 | 1 |
| <i>circST6GAL2</i> | miR-4713-5p                 | 1 |
| <i>circST6GAL2</i> | miR-4715-3p                 | 2 |
| <i>circST6GAL2</i> | miR-4716-3p/6794-5p         | 1 |
| <i>circST6GAL2</i> | miR-4716-5p                 | 1 |
| <i>circST6GAL2</i> | miR-4717-3p                 | 1 |
| <i>circST6GAL2</i> | miR-4718                    | 1 |
| <i>circST6GAL2</i> | miR-4720-3p                 | 1 |
| <i>circST6GAL2</i> | miR-4720-5p/4799-3p/5588-5p | 2 |
| <i>circST6GAL2</i> | miR-4721                    | 1 |
| <i>circST6GAL2</i> | miR-4726-3p                 | 1 |
| <i>circST6GAL2</i> | miR-4727-5p                 | 2 |
| <i>circST6GAL2</i> | miR-4728-3p                 | 1 |
| <i>circST6GAL2</i> | miR-4730                    | 1 |
| <i>circST6GAL2</i> | miR-4731-3p/4801            | 2 |
| <i>circST6GAL2</i> | miR-4731-5p                 | 1 |
| <i>circST6GAL2</i> | miR-4732-3p                 | 1 |
| <i>circST6GAL2</i> | miR-4733-3p                 | 2 |
| <i>circST6GAL2</i> | miR-4733-5p                 | 1 |
| <i>circST6GAL2</i> | miR-4734                    | 1 |
| <i>circST6GAL2</i> | miR-4736                    | 1 |
| <i>circST6GAL2</i> | miR-4740-5p                 | 1 |
| <i>circST6GAL2</i> | miR-4743-5p                 | 1 |
| <i>circST6GAL2</i> | miR-4747-3p                 | 1 |
| <i>circST6GAL2</i> | miR-4747-5p/5196-5p         | 2 |
| <i>circST6GAL2</i> | miR-4749-3p                 | 1 |
| <i>circST6GAL2</i> | miR-4750-5p                 | 1 |
| <i>circST6GAL2</i> | miR-4753-3p                 | 1 |

|                    |                     |   |
|--------------------|---------------------|---|
| <i>circST6GAL2</i> | miR-4754            | 2 |
| <i>circST6GAL2</i> | miR-4755-3p         | 3 |
| <i>circST6GAL2</i> | miR-4755-5p/5006-3p | 1 |
| <i>circST6GAL2</i> | miR-4757-3p         | 1 |
| <i>circST6GAL2</i> | miR-4759            | 1 |
| <i>circST6GAL2</i> | miR-4761-3p         | 1 |
| <i>circST6GAL2</i> | miR-4761-5p         | 2 |
| <i>circST6GAL2</i> | miR-4763-5p         | 2 |
| <i>circST6GAL2</i> | miR-4767            | 1 |
| <i>circST6GAL2</i> | miR-4769-3p/6817-5p | 4 |
| <i>circST6GAL2</i> | miR-4776-3p         | 1 |
| <i>circST6GAL2</i> | miR-4778-3p         | 1 |
| <i>circST6GAL2</i> | miR-4779            | 3 |
| <i>circST6GAL2</i> | miR-4780            | 2 |
| <i>circST6GAL2</i> | miR-4781-5p         | 2 |
| <i>circST6GAL2</i> | miR-4782-5p/5706    | 1 |
| <i>circST6GAL2</i> | miR-4783-5p         | 2 |
| <i>circST6GAL2</i> | miR-4786-5p         | 4 |
| <i>circST6GAL2</i> | miR-4790-5p         | 2 |
| <i>circST6GAL2</i> | miR-4793-3p         | 2 |
| <i>circST6GAL2</i> | miR-4795-5p         | 1 |
| <i>circST6GAL2</i> | miR-4802-5p         | 2 |
| <i>circST6GAL2</i> | miR-4803            | 2 |
| <i>circST6GAL2</i> | miR-4804-3p         | 1 |
| <i>circST6GAL2</i> | miR-4804-5p         | 2 |
| <i>circST6GAL2</i> | miR-483-3p.1        | 1 |
| <i>circST6GAL2</i> | miR-484/3155        | 2 |
| <i>circST6GAL2</i> | miR-485-5p          | 2 |
| <i>circST6GAL2</i> | miR-486-5p          | 2 |
| <i>circST6GAL2</i> | miR-488-5p          | 1 |
| <i>circST6GAL2</i> | miR-491-5p          | 1 |
| <i>circST6GAL2</i> | miR-492             | 1 |
| <i>circST6GAL2</i> | miR-495-5p          | 1 |
| <i>circST6GAL2</i> | miR-498             | 1 |
| <i>circST6GAL2</i> | miR-4999-5p         | 1 |
| <i>circST6GAL2</i> | miR-499a-5p         | 2 |
| <i>circST6GAL2</i> | miR-5000-3p         | 1 |
| <i>circST6GAL2</i> | miR-5001-3p         | 2 |



|                    |                             |   |
|--------------------|-----------------------------|---|
| <i>circST6GAL2</i> | miR-5003-3p                 | 1 |
| <i>circST6GAL2</i> | miR-5006-5p                 | 1 |
| <i>circST6GAL2</i> | miR-5008-3p/6737-3p/7157-3p | 1 |
| <i>circST6GAL2</i> | miR-5008-5p                 | 1 |
| <i>circST6GAL2</i> | miR-500a-3p                 | 1 |
| <i>circST6GAL2</i> | miR-500a-5p                 | 1 |
| <i>circST6GAL2</i> | miR-500b-3p                 | 4 |
| <i>circST6GAL2</i> | miR-502-5p                  | 1 |
| <i>circST6GAL2</i> | miR-503-5p                  | 3 |
| <i>circST6GAL2</i> | miR-504-3p                  | 1 |
| <i>circST6GAL2</i> | miR-505-3p.2                | 1 |
| <i>circST6GAL2</i> | miR-505-5p                  | 2 |
| <i>circST6GAL2</i> | miR-5087                    | 1 |
| <i>circST6GAL2</i> | miR-5088-3p                 | 2 |
| <i>circST6GAL2</i> | miR-5088-5p                 | 2 |
| <i>circST6GAL2</i> | miR-5090/6775-5p            | 1 |
| <i>circST6GAL2</i> | miR-511-5p                  | 1 |
| <i>circST6GAL2</i> | miR-512-3p                  | 1 |
| <i>circST6GAL2</i> | miR-512-5p                  | 1 |
| <i>circST6GAL2</i> | miR-513c-5p/514b-5p         | 1 |
| <i>circST6GAL2</i> | miR-515-5p/519e-5p          | 1 |
| <i>circST6GAL2</i> | miR-516a-3p/516b-3p/7162-5p | 1 |
| <i>circST6GAL2</i> | miR-516b-5p                 | 1 |
| <i>circST6GAL2</i> | miR-5189-3p                 | 1 |
| <i>circST6GAL2</i> | miR-519-3p                  | 1 |
| <i>circST6GAL2</i> | miR-5194                    | 1 |
| <i>circST6GAL2</i> | miR-520g-3p                 | 1 |
| <i>circST6GAL2</i> | miR-521                     | 1 |
| <i>circST6GAL2</i> | miR-522-3p                  | 1 |
| <i>circST6GAL2</i> | miR-524-3p/525-3p           | 1 |
| <i>circST6GAL2</i> | miR-525-5p                  | 1 |
| <i>circST6GAL2</i> | miR-543                     | 1 |
| <i>circST6GAL2</i> | miR-544a                    | 3 |
| <i>circST6GAL2</i> | miR-544b                    | 1 |
| <i>circST6GAL2</i> | miR-545-3p                  | 1 |
| <i>circST6GAL2</i> | miR-548ah-5p/3609           | 1 |
| <i>circST6GAL2</i> | miR-548al/4445-3p           | 1 |
| <i>circST6GAL2</i> | miR-548e-5p                 | 2 |

|                    |                  |   |
|--------------------|------------------|---|
| <i>circST6GAL2</i> | miR-548q         | 2 |
| <i>circST6GAL2</i> | miR-549a         | 2 |
| <i>circST6GAL2</i> | miR-550b-2-5p    | 1 |
| <i>circST6GAL2</i> | miR-552-3p       | 2 |
| <i>circST6GAL2</i> | miR-556-5p       | 1 |
| <i>circST6GAL2</i> | miR-5572         | 2 |
| <i>circST6GAL2</i> | miR-5580-5p      | 2 |
| <i>circST6GAL2</i> | miR-5581-3p      | 1 |
| <i>circST6GAL2</i> | miR-5582-5p      | 1 |
| <i>circST6GAL2</i> | miR-5587-3p      | 1 |
| <i>circST6GAL2</i> | miR-5587-5p      | 1 |
| <i>circST6GAL2</i> | miR-5588-3p      | 1 |
| <i>circST6GAL2</i> | miR-5589-3p      | 1 |
| <i>circST6GAL2</i> | miR-5589-5p      | 1 |
| <i>circST6GAL2</i> | miR-5590-5p      | 3 |
| <i>circST6GAL2</i> | miR-5591-3p      | 1 |
| <i>circST6GAL2</i> | miR-566          | 3 |
| <i>circST6GAL2</i> | miR-567          | 1 |
| <i>circST6GAL2</i> | miR-5680         | 1 |
| <i>circST6GAL2</i> | miR-5687         | 1 |
| <i>circST6GAL2</i> | miR-5689         | 2 |
| <i>circST6GAL2</i> | miR-5691         | 2 |
| <i>circST6GAL2</i> | miR-5700         | 1 |
| <i>circST6GAL2</i> | miR-575/4676-5p  | 3 |
| <i>circST6GAL2</i> | miR-578          | 1 |
| <i>circST6GAL2</i> | miR-582-5p       | 1 |
| <i>circST6GAL2</i> | miR-584-5p       | 1 |
| <i>circST6GAL2</i> | miR-593-3p       | 2 |
| <i>circST6GAL2</i> | miR-593-5p       | 2 |
| <i>circST6GAL2</i> | miR-596          | 1 |
| <i>circST6GAL2</i> | miR-604          | 2 |
| <i>circST6GAL2</i> | miR-605-3p       | 1 |
| <i>circST6GAL2</i> | miR-6070         | 1 |
| <i>circST6GAL2</i> | miR-6076/6797-3p | 1 |
| <i>circST6GAL2</i> | miR-6078         | 3 |
| <i>circST6GAL2</i> | miR-6079         | 2 |
| <i>circST6GAL2</i> | miR-608/4651     | 1 |
| <i>circST6GAL2</i> | miR-6080         | 1 |

|                    |                                      |   |
|--------------------|--------------------------------------|---|
| <i>circST6GAL2</i> | miR-6085/6813-5p                     | 1 |
| <i>circST6GAL2</i> | miR-6087                             | 2 |
| <i>circST6GAL2</i> | miR-6089                             | 1 |
| <i>circST6GAL2</i> | miR-6090                             | 1 |
| <i>circST6GAL2</i> | miR-612/1285-3p/3187-5p/5189-5p/6860 | 1 |
| <i>circST6GAL2</i> | miR-6126                             | 1 |
| <i>circST6GAL2</i> | miR-6128                             | 1 |
| <i>circST6GAL2</i> | miR-6131                             | 2 |
| <i>circST6GAL2</i> | miR-6132/6836-5p                     | 3 |
| <i>circST6GAL2</i> | miR-6165                             | 1 |
| <i>circST6GAL2</i> | miR-622                              | 1 |
| <i>circST6GAL2</i> | miR-623                              | 1 |
| <i>circST6GAL2</i> | miR-624-3p                           | 2 |
| <i>circST6GAL2</i> | miR-626/6876-3p                      | 2 |
| <i>circST6GAL2</i> | miR-627-3p                           | 4 |
| <i>circST6GAL2</i> | miR-628-5p                           | 5 |
| <i>circST6GAL2</i> | miR-629-5p                           | 1 |
| <i>circST6GAL2</i> | miR-631/3661                         | 3 |
| <i>circST6GAL2</i> | miR-632/4288                         | 1 |
| <i>circST6GAL2</i> | miR-634                              | 2 |
| <i>circST6GAL2</i> | miR-635/6774-5p                      | 4 |
| <i>circST6GAL2</i> | miR-636                              | 1 |
| <i>circST6GAL2</i> | miR-637                              | 1 |
| <i>circST6GAL2</i> | miR-641/3617-5p                      | 2 |
| <i>circST6GAL2</i> | miR-642-3p                           | 2 |
| <i>circST6GAL2</i> | miR-642a-5p                          | 2 |
| <i>circST6GAL2</i> | miR-644a                             | 1 |
| <i>circST6GAL2</i> | miR-646                              | 3 |
| <i>circST6GAL2</i> | miR-6500-3p                          | 2 |
| <i>circST6GAL2</i> | miR-6502-3p                          | 1 |
| <i>circST6GAL2</i> | miR-6508-3p                          | 1 |
| <i>circST6GAL2</i> | miR-6510-3p                          | 2 |
| <i>circST6GAL2</i> | miR-6510-5p                          | 1 |
| <i>circST6GAL2</i> | miR-6511-3p                          | 1 |
| <i>circST6GAL2</i> | miR-6511-5p                          | 3 |
| <i>circST6GAL2</i> | miR-6514-5p                          | 2 |
| <i>circST6GAL2</i> | miR-6515-3p                          | 2 |
| <i>circST6GAL2</i> | miR-6515-5p                          | 1 |

|                    |                     |   |
|--------------------|---------------------|---|
| <i>circST6GAL2</i> | miR-6516-3p         | 1 |
| <i>circST6GAL2</i> | miR-6516-5p         | 1 |
| <i>circST6GAL2</i> | miR-653-5p          | 2 |
| <i>circST6GAL2</i> | miR-654-3p          | 1 |
| <i>circST6GAL2</i> | miR-654-5p          | 1 |
| <i>circST6GAL2</i> | miR-656-5p          | 1 |
| <i>circST6GAL2</i> | miR-657             | 1 |
| <i>circST6GAL2</i> | miR-658             | 1 |
| <i>circST6GAL2</i> | miR-659-5p          | 1 |
| <i>circST6GAL2</i> | miR-660-5p          | 3 |
| <i>circST6GAL2</i> | miR-662             | 1 |
| <i>circST6GAL2</i> | miR-664a-3p         | 1 |
| <i>circST6GAL2</i> | miR-664a-5p/4794    | 2 |
| <i>circST6GAL2</i> | miR-664b-5p         | 1 |
| <i>circST6GAL2</i> | miR-665             | 1 |
| <i>circST6GAL2</i> | miR-668-5p          | 2 |
| <i>circST6GAL2</i> | miR-671-3p          | 1 |
| <i>circST6GAL2</i> | miR-671-5p          | 3 |
| <i>circST6GAL2</i> | miR-6717-5p         | 1 |
| <i>circST6GAL2</i> | miR-6720-3p         | 2 |
| <i>circST6GAL2</i> | miR-6720-5p         | 1 |
| <i>circST6GAL2</i> | miR-6722-5p         | 1 |
| <i>circST6GAL2</i> | miR-6724-5p/6773-5p | 1 |
| <i>circST6GAL2</i> | miR-6729-3p         | 1 |
| <i>circST6GAL2</i> | miR-6731-5p/8085    | 1 |
| <i>circST6GAL2</i> | miR-6732-3p         | 1 |
| <i>circST6GAL2</i> | miR-6732-5p         | 1 |
| <i>circST6GAL2</i> | miR-6734-3p         | 4 |
| <i>circST6GAL2</i> | miR-6738-3p         | 3 |
| <i>circST6GAL2</i> | miR-6739-3p         | 1 |
| <i>circST6GAL2</i> | miR-6740-3p         | 1 |
| <i>circST6GAL2</i> | miR-6740-5p         | 1 |
| <i>circST6GAL2</i> | miR-6741-3p         | 1 |
| <i>circST6GAL2</i> | miR-6742-5p         | 1 |
| <i>circST6GAL2</i> | miR-6744-5p         | 1 |
| <i>circST6GAL2</i> | miR-6746-3p         | 1 |
| <i>circST6GAL2</i> | miR-6746-5p         | 2 |
| <i>circST6GAL2</i> | miR-6747-5p         | 1 |

|                    |                       |   |
|--------------------|-----------------------|---|
| <i>circST6GAL2</i> | miR-6749-3p           | 1 |
| <i>circST6GAL2</i> | miR-6749-5p           | 1 |
| <i>circST6GAL2</i> | miR-675-5p/4466       | 1 |
| <i>circST6GAL2</i> | miR-6751-5p/6803-5p   | 3 |
| <i>circST6GAL2</i> | miR-6753-3p/7107-3p   | 1 |
| <i>circST6GAL2</i> | miR-6753-5p           | 1 |
| <i>circST6GAL2</i> | miR-6756-5p/6766-5p   | 1 |
| <i>circST6GAL2</i> | miR-6759-3p           | 1 |
| <i>circST6GAL2</i> | miR-6762-3p           | 2 |
| <i>circST6GAL2</i> | miR-6762-5p/6845-5p   | 2 |
| <i>circST6GAL2</i> | miR-6763-3p           | 1 |
| <i>circST6GAL2</i> | miR-6765-5p           | 1 |
| <i>circST6GAL2</i> | miR-6767-5p           | 2 |
| <i>circST6GAL2</i> | miR-6768-5p           | 1 |
| <i>circST6GAL2</i> | miR-6769a-5p/6769b-5p | 1 |
| <i>circST6GAL2</i> | miR-6770-3p           | 1 |
| <i>circST6GAL2</i> | miR-6773-3p           | 1 |
| <i>circST6GAL2</i> | miR-6777-5p/6889-5p   | 1 |
| <i>circST6GAL2</i> | miR-6779-3p           | 4 |
| <i>circST6GAL2</i> | miR-6780a-3p          | 2 |
| <i>circST6GAL2</i> | miR-6780b-3p          | 2 |
| <i>circST6GAL2</i> | miR-6783-5p           | 3 |
| <i>circST6GAL2</i> | miR-6784-3p/6862-3p   | 1 |
| <i>circST6GAL2</i> | miR-6784-5p           | 1 |
| <i>circST6GAL2</i> | miR-6787-3p           | 2 |
| <i>circST6GAL2</i> | miR-6789-3p           | 3 |
| <i>circST6GAL2</i> | miR-6792-5p           | 2 |
| <i>circST6GAL2</i> | miR-6798-5p           | 3 |
| <i>circST6GAL2</i> | miR-6799-5p           | 2 |
| <i>circST6GAL2</i> | miR-6801-3p/6810-3p   | 1 |
| <i>circST6GAL2</i> | miR-6801-5p           | 1 |
| <i>circST6GAL2</i> | miR-6802-3p           | 1 |
| <i>circST6GAL2</i> | miR-6805-5p           | 1 |
| <i>circST6GAL2</i> | miR-6807-5p           | 3 |
| <i>circST6GAL2</i> | miR-6809-5p           | 1 |
| <i>circST6GAL2</i> | miR-6810-5p           | 1 |
| <i>circST6GAL2</i> | miR-6811-3p           | 1 |
| <i>circST6GAL2</i> | miR-6814-5p           | 1 |

|                    |                     |   |
|--------------------|---------------------|---|
| <i>circST6GAL2</i> | miR-6815-5p/6865-5p | 1 |
| <i>circST6GAL2</i> | miR-6816-3p         | 1 |
| <i>circST6GAL2</i> | miR-6818-5p         | 1 |
| <i>circST6GAL2</i> | miR-6822-3p         | 1 |
| <i>circST6GAL2</i> | miR-6823-5p         | 1 |
| <i>circST6GAL2</i> | miR-6825-3p         | 1 |
| <i>circST6GAL2</i> | miR-6825-5p         | 2 |
| <i>circST6GAL2</i> | miR-6828-5p         | 3 |
| <i>circST6GAL2</i> | miR-6829-5p         | 5 |
| <i>circST6GAL2</i> | miR-6830-3p         | 1 |
| <i>circST6GAL2</i> | miR-6832-3p         | 1 |
| <i>circST6GAL2</i> | miR-6834-3p         | 1 |
| <i>circST6GAL2</i> | miR-6837-3p         | 2 |
| <i>circST6GAL2</i> | miR-6838-3p         | 1 |
| <i>circST6GAL2</i> | miR-6839-3p         | 1 |
| <i>circST6GAL2</i> | miR-6840-3p         | 1 |
| <i>circST6GAL2</i> | miR-6840-5p         | 2 |
| <i>circST6GAL2</i> | miR-6841-3p         | 2 |
| <i>circST6GAL2</i> | miR-6843-3p/6848-3p | 2 |
| <i>circST6GAL2</i> | miR-6845-3p         | 2 |
| <i>circST6GAL2</i> | miR-6846-5p/6848-5p | 4 |
| <i>circST6GAL2</i> | miR-6847-5p         | 1 |
| <i>circST6GAL2</i> | miR-6850-5p         | 2 |
| <i>circST6GAL2</i> | miR-6853-3p         | 2 |
| <i>circST6GAL2</i> | miR-6854-5p         | 1 |
| <i>circST6GAL2</i> | miR-6856-3p         | 1 |
| <i>circST6GAL2</i> | miR-6857-5p         | 1 |
| <i>circST6GAL2</i> | miR-6858-3p         | 3 |
| <i>circST6GAL2</i> | miR-6861-3p         | 1 |
| <i>circST6GAL2</i> | miR-6864-5p         | 1 |
| <i>circST6GAL2</i> | miR-6867-3p         | 1 |
| <i>circST6GAL2</i> | miR-6867-5p         | 1 |
| <i>circST6GAL2</i> | miR-6868-3p         | 1 |
| <i>circST6GAL2</i> | miR-6868-5p         | 2 |
| <i>circST6GAL2</i> | miR-6869-3p         | 1 |
| <i>circST6GAL2</i> | miR-6871-3p         | 2 |
| <i>circST6GAL2</i> | miR-6873-3p         | 1 |
| <i>circST6GAL2</i> | miR-6878-5p         | 1 |

|                    |                           |   |
|--------------------|---------------------------|---|
| <i>circST6GAL2</i> | miR-6881-3p               | 2 |
| <i>circST6GAL2</i> | miR-6882-3p               | 1 |
| <i>circST6GAL2</i> | miR-6885-3p               | 3 |
| <i>circST6GAL2</i> | miR-6886-3p               | 3 |
| <i>circST6GAL2</i> | miR-6886-5p               | 2 |
| <i>circST6GAL2</i> | miR-6889-3p               | 1 |
| <i>circST6GAL2</i> | miR-6892-3p               | 1 |
| <i>circST6GAL2</i> | miR-6894-5p               | 2 |
| <i>circST6GAL2</i> | miR-6895-3p               | 2 |
| <i>circST6GAL2</i> | miR-6895-5p               | 1 |
| <i>circST6GAL2</i> | miR-7-3p                  | 1 |
| <i>circST6GAL2</i> | miR-7106-3p               | 1 |
| <i>circST6GAL2</i> | miR-7106-5p               | 2 |
| <i>circST6GAL2</i> | miR-7108-3p               | 2 |
| <i>circST6GAL2</i> | miR-7109-5p               | 3 |
| <i>circST6GAL2</i> | miR-7111-3p               | 2 |
| <i>circST6GAL2</i> | miR-7112-3p               | 1 |
| <i>circST6GAL2</i> | miR-7113-3p               | 2 |
| <i>circST6GAL2</i> | miR-7113-5p               | 2 |
| <i>circST6GAL2</i> | miR-7152-3p               | 1 |
| <i>circST6GAL2</i> | miR-7152-5p               | 2 |
| <i>circST6GAL2</i> | miR-7154-3p               | 2 |
| <i>circST6GAL2</i> | miR-7155-5p               | 1 |
| <i>circST6GAL2</i> | miR-7159-5p               | 1 |
| <i>circST6GAL2</i> | miR-7160-3p               | 1 |
| <i>circST6GAL2</i> | miR-7160-5p               | 2 |
| <i>circST6GAL2</i> | miR-7161-3p               | 1 |
| <i>circST6GAL2</i> | miR-744-5p                | 1 |
| <i>circST6GAL2</i> | miR-7515                  | 1 |
| <i>circST6GAL2</i> | miR-760                   | 1 |
| <i>circST6GAL2</i> | miR-762/4492/4498/5001-5p | 5 |
| <i>circST6GAL2</i> | miR-765                   | 2 |
| <i>circST6GAL2</i> | miR-766-3p                | 1 |
| <i>circST6GAL2</i> | miR-766-5p                | 2 |
| <i>circST6GAL2</i> | miR-767-5p                | 2 |
| <i>circST6GAL2</i> | miR-769-5p                | 4 |
| <i>circST6GAL2</i> | miR-770-5p                | 2 |
| <i>circST6GAL2</i> | miR-7706                  | 1 |

|                    |                              |   |
|--------------------|------------------------------|---|
| <i>circST6GAL2</i> | miR-7843-3p                  | 3 |
| <i>circST6GAL2</i> | miR-7852-3p                  | 1 |
| <i>circST6GAL2</i> | miR-7855-5p                  | 1 |
| <i>circST6GAL2</i> | miR-7856-5p                  | 2 |
| <i>circST6GAL2</i> | miR-7974                     | 2 |
| <i>circST6GAL2</i> | miR-7976                     | 1 |
| <i>circST6GAL2</i> | miR-7977                     | 1 |
| <i>circST6GAL2</i> | miR-7978                     | 2 |
| <i>circST6GAL2</i> | miR-8053                     | 1 |
| <i>circST6GAL2</i> | miR-8060                     | 2 |
| <i>circST6GAL2</i> | miR-8063                     | 1 |
| <i>circST6GAL2</i> | miR-8075                     | 2 |
| <i>circST6GAL2</i> | miR-8077                     | 2 |
| <i>circST6GAL2</i> | miR-8080                     | 1 |
| <i>circST6GAL2</i> | miR-8083                     | 1 |
| <i>circST6GAL2</i> | miR-876-3p                   | 2 |
| <i>circST6GAL2</i> | miR-887-3p                   | 1 |
| <i>circST6GAL2</i> | miR-890                      | 1 |
| <i>circST6GAL2</i> | miR-891a-3p                  | 2 |
| <i>circST6GAL2</i> | miR-920/4300/5591-5p/6726-5p | 1 |
| <i>circST6GAL2</i> | miR-922                      | 2 |
| <i>circST6GAL2</i> | miR-92a-2-5p                 | 1 |
| <i>circST6GAL2</i> | miR-93-3p                    | 2 |
| <i>circST6GAL2</i> | miR-933                      | 1 |
| <i>circST6GAL2</i> | miR-937-3p                   | 1 |
| <i>circST6GAL2</i> | miR-938                      | 3 |
| <i>circST6GAL2</i> | miR-939-5p/1343-5p           | 2 |
| <i>circST6GAL2</i> | miR-940/6808-5p/6893-5p      | 1 |
| <i>circST6GAL2</i> | miR-941                      | 1 |
| <i>circST6GAL2</i> | miR-96-3p                    | 1 |
| <i>circSTXBP5L</i> | let-7a-2-3p/let-7g-3p        | 1 |
| <i>circSTXBP5L</i> | let-7c-3p                    | 1 |
| <i>circSTXBP5L</i> | miR-101-3p.1                 | 3 |
| <i>circSTXBP5L</i> | miR-101-3p.2                 | 2 |
| <i>circSTXBP5L</i> | miR-1238-3p                  | 1 |
| <i>circSTXBP5L</i> | miR-1243                     | 1 |
| <i>circSTXBP5L</i> | miR-1250-3p                  | 1 |
| <i>circSTXBP5L</i> | miR-1255a/1255b-5p           | 1 |



|                    |                     |   |
|--------------------|---------------------|---|
| <i>circSTXBP5L</i> | miR-1261            | 3 |
| <i>circSTXBP5L</i> | miR-1272            | 3 |
| <i>circSTXBP5L</i> | miR-1273a           | 2 |
| <i>circSTXBP5L</i> | miR-1299            | 3 |
| <i>circSTXBP5L</i> | miR-1305            | 4 |
| <i>circSTXBP5L</i> | miR-130b-5p         | 2 |
| <i>circSTXBP5L</i> | miR-1322            | 3 |
| <i>circSTXBP5L</i> | miR-135-5p          | 2 |
| <i>circSTXBP5L</i> | miR-139-5p          | 2 |
| <i>circSTXBP5L</i> | miR-142-5p          | 2 |
| <i>circSTXBP5L</i> | miR-144-3p          | 3 |
| <i>circSTXBP5L</i> | miR-148b-5p/6874-3p | 1 |
| <i>circSTXBP5L</i> | miR-154-3p/487-3p   | 1 |
| <i>circSTXBP5L</i> | miR-1587/3620-5p    | 2 |
| <i>circSTXBP5L</i> | miR-16-2-3p/195-3p  | 2 |
| <i>circSTXBP5L</i> | miR-185-3p          | 1 |
| <i>circSTXBP5L</i> | miR-186-5p          | 1 |
| <i>circSTXBP5L</i> | miR-192-3p          | 2 |
| <i>circSTXBP5L</i> | miR-196-5p          | 1 |
| <i>circSTXBP5L</i> | miR-200-3p/429      | 1 |
| <i>circSTXBP5L</i> | miR-200c-5p/550a-3p | 1 |
| <i>circSTXBP5L</i> | miR-203b-3p         | 2 |
| <i>circSTXBP5L</i> | miR-205-3p          | 3 |
| <i>circSTXBP5L</i> | miR-205-5p          | 1 |
| <i>circSTXBP5L</i> | miR-2114-5p         | 1 |
| <i>circSTXBP5L</i> | miR-219a-2-3p       | 5 |
| <i>circSTXBP5L</i> | miR-219b-3p         | 5 |
| <i>circSTXBP5L</i> | miR-223-5p          | 1 |
| <i>circSTXBP5L</i> | miR-224-5p          | 4 |
| <i>circSTXBP5L</i> | miR-23-5p           | 3 |
| <i>circSTXBP5L</i> | miR-2392            | 1 |
| <i>circSTXBP5L</i> | miR-26-5p           | 3 |
| <i>circSTXBP5L</i> | miR-26b-3p          | 1 |
| <i>circSTXBP5L</i> | miR-27a-5p          | 2 |
| <i>circSTXBP5L</i> | miR-299-3p          | 4 |
| <i>circSTXBP5L</i> | miR-29b-1-5p        | 1 |
| <i>circSTXBP5L</i> | miR-30-3p           | 2 |
| <i>circSTXBP5L</i> | miR-302a-5p         | 1 |

|                    |                     |   |
|--------------------|---------------------|---|
| <i>circSTXBP5L</i> | miR-302f            | 4 |
| <i>circSTXBP5L</i> | miR-3119            | 2 |
| <i>circSTXBP5L</i> | miR-3130-3p         | 2 |
| <i>circSTXBP5L</i> | miR-3133            | 1 |
| <i>circSTXBP5L</i> | miR-3140-3p         | 3 |
| <i>circSTXBP5L</i> | miR-3141            | 3 |
| <i>circSTXBP5L</i> | miR-3143            | 1 |
| <i>circSTXBP5L</i> | miR-3152-5p         | 2 |
| <i>circSTXBP5L</i> | miR-3157-3p         | 2 |
| <i>circSTXBP5L</i> | miR-3161            | 1 |
| <i>circSTXBP5L</i> | miR-3168            | 1 |
| <i>circSTXBP5L</i> | miR-3190-3p         | 3 |
| <i>circSTXBP5L</i> | miR-3200-5p         | 3 |
| <i>circSTXBP5L</i> | miR-326             | 1 |
| <i>circSTXBP5L</i> | miR-335-3p          | 3 |
| <i>circSTXBP5L</i> | miR-338-5p          | 1 |
| <i>circSTXBP5L</i> | miR-3591-5p         | 1 |
| <i>circSTXBP5L</i> | miR-3607-5p         | 2 |
| <i>circSTXBP5L</i> | miR-3651            | 2 |
| <i>circSTXBP5L</i> | miR-3654            | 1 |
| <i>circSTXBP5L</i> | miR-3664-5p         | 1 |
| <i>circSTXBP5L</i> | miR-3675-3p         | 4 |
| <i>circSTXBP5L</i> | miR-3681-5p         | 1 |
| <i>circSTXBP5L</i> | miR-369-3p          | 3 |
| <i>circSTXBP5L</i> | miR-3690            | 1 |
| <i>circSTXBP5L</i> | miR-3691-5p         | 1 |
| <i>circSTXBP5L</i> | miR-3692-3p         | 1 |
| <i>circSTXBP5L</i> | miR-374b-3p         | 1 |
| <i>circSTXBP5L</i> | miR-376a-2-5p       | 1 |
| <i>circSTXBP5L</i> | miR-376a-5p         | 1 |
| <i>circSTXBP5L</i> | miR-376b-5p/376c-5p | 3 |
| <i>circSTXBP5L</i> | miR-378-3p          | 1 |
| <i>circSTXBP5L</i> | miR-378j/6839-5p    | 1 |
| <i>circSTXBP5L</i> | miR-379-5p          | 1 |
| <i>circSTXBP5L</i> | miR-3927-3p/6831-5p | 1 |
| <i>circSTXBP5L</i> | miR-3978            | 5 |
| <i>circSTXBP5L</i> | miR-4254            | 1 |
| <i>circSTXBP5L</i> | miR-4264            | 1 |

|                    |                     |   |
|--------------------|---------------------|---|
| <i>circSTXBP5L</i> | miR-4272            | 1 |
| <i>circSTXBP5L</i> | miR-4274            | 1 |
| <i>circSTXBP5L</i> | miR-4277            | 1 |
| <i>circSTXBP5L</i> | miR-4290            | 2 |
| <i>circSTXBP5L</i> | miR-4297/5581-5p    | 1 |
| <i>circSTXBP5L</i> | miR-4312            | 1 |
| <i>circSTXBP5L</i> | miR-432-3p          | 1 |
| <i>circSTXBP5L</i> | miR-4328            | 1 |
| <i>circSTXBP5L</i> | miR-433-3p          | 3 |
| <i>circSTXBP5L</i> | miR-4427            | 4 |
| <i>circSTXBP5L</i> | miR-4433a-5p        | 1 |
| <i>circSTXBP5L</i> | miR-4451            | 1 |
| <i>circSTXBP5L</i> | miR-4460            | 1 |
| <i>circSTXBP5L</i> | miR-4491/4657       | 4 |
| <i>circSTXBP5L</i> | miR-4517            | 2 |
| <i>circSTXBP5L</i> | miR-4519            | 1 |
| <i>circSTXBP5L</i> | miR-452-3p          | 1 |
| <i>circSTXBP5L</i> | miR-452-5p/892-3p   | 3 |
| <i>circSTXBP5L</i> | miR-4524-5p         | 1 |
| <i>circSTXBP5L</i> | miR-4527/6503-5p    | 2 |
| <i>circSTXBP5L</i> | miR-4535            | 1 |
| <i>circSTXBP5L</i> | miR-4638-3p         | 1 |
| <i>circSTXBP5L</i> | miR-4649-5p/6729-5p | 2 |
| <i>circSTXBP5L</i> | miR-4650-3p         | 1 |
| <i>circSTXBP5L</i> | miR-4652-3p         | 1 |
| <i>circSTXBP5L</i> | miR-4674            | 2 |
| <i>circSTXBP5L</i> | miR-4680-3p         | 4 |
| <i>circSTXBP5L</i> | miR-4699-3p         | 2 |
| <i>circSTXBP5L</i> | miR-4705            | 2 |
| <i>circSTXBP5L</i> | miR-4714-5p         | 1 |
| <i>circSTXBP5L</i> | miR-4717-3p         | 2 |
| <i>circSTXBP5L</i> | miR-4720-3p         | 1 |
| <i>circSTXBP5L</i> | miR-4727-3p         | 1 |
| <i>circSTXBP5L</i> | miR-4729            | 3 |
| <i>circSTXBP5L</i> | miR-4743-3p         | 1 |
| <i>circSTXBP5L</i> | miR-4752            | 4 |
| <i>circSTXBP5L</i> | miR-4753-3p         | 2 |
| <i>circSTXBP5L</i> | miR-4760-5p/8061    | 1 |

|                    |                              |   |
|--------------------|------------------------------|---|
| <i>circSTXBP5L</i> | miR-4774-3p                  | 2 |
| <i>circSTXBP5L</i> | miR-4776-5p                  | 1 |
| <i>circSTXBP5L</i> | miR-4782-5p/5706             | 3 |
| <i>circSTXBP5L</i> | miR-4790-3p                  | 3 |
| <i>circSTXBP5L</i> | miR-4790-5p                  | 1 |
| <i>circSTXBP5L</i> | miR-4793-3p                  | 2 |
| <i>circSTXBP5L</i> | miR-4797-3p                  | 1 |
| <i>circSTXBP5L</i> | miR-4803                     | 4 |
| <i>circSTXBP5L</i> | miR-4804-3p                  | 1 |
| <i>circSTXBP5L</i> | miR-488-3p                   | 2 |
| <i>circSTXBP5L</i> | miR-492                      | 1 |
| <i>circSTXBP5L</i> | miR-493-5p                   | 1 |
| <i>circSTXBP5L</i> | miR-498                      | 3 |
| <i>circSTXBP5L</i> | miR-5000-5p                  | 1 |
| <i>circSTXBP5L</i> | miR-511-3p                   | 1 |
| <i>circSTXBP5L</i> | miR-514a-5p                  | 1 |
| <i>circSTXBP5L</i> | miR-516b-5p                  | 3 |
| <i>circSTXBP5L</i> | miR-5187-3p                  | 4 |
| <i>circSTXBP5L</i> | miR-518c-5p                  | 1 |
| <i>circSTXBP5L</i> | miR-5191                     | 1 |
| <i>circSTXBP5L</i> | miR-5197-5p                  | 5 |
| <i>circSTXBP5L</i> | miR-525-5p                   | 1 |
| <i>circSTXBP5L</i> | miR-544a                     | 1 |
| <i>circSTXBP5L</i> | miR-548ai/548ag/548ba/570-5p | 1 |
| <i>circSTXBP5L</i> | miR-548m                     | 1 |
| <i>circSTXBP5L</i> | miR-5580-3p                  | 2 |
| <i>circSTXBP5L</i> | miR-5583-3p                  | 2 |
| <i>circSTXBP5L</i> | miR-5584-3p                  | 1 |
| <i>circSTXBP5L</i> | miR-5585-3p                  | 2 |
| <i>circSTXBP5L</i> | miR-5586-5p                  | 1 |
| <i>circSTXBP5L</i> | miR-5588-3p                  | 1 |
| <i>circSTXBP5L</i> | miR-5589-3p                  | 2 |
| <i>circSTXBP5L</i> | miR-5681a                    | 2 |
| <i>circSTXBP5L</i> | miR-5691                     | 2 |
| <i>circSTXBP5L</i> | miR-5692bc                   | 3 |
| <i>circSTXBP5L</i> | miR-582-5p                   | 2 |
| <i>circSTXBP5L</i> | miR-584-3p                   | 3 |
| <i>circSTXBP5L</i> | miR-587                      | 4 |

|                    |                     |   |
|--------------------|---------------------|---|
| <i>circSTXBP5L</i> | miR-604             | 2 |
| <i>circSTXBP5L</i> | miR-606             | 4 |
| <i>circSTXBP5L</i> | miR-6071            | 1 |
| <i>circSTXBP5L</i> | miR-6072/6891-3p    | 4 |
| <i>circSTXBP5L</i> | miR-6128            | 4 |
| <i>circSTXBP5L</i> | miR-618             | 2 |
| <i>circSTXBP5L</i> | miR-619-3p          | 1 |
| <i>circSTXBP5L</i> | miR-624-5p          | 2 |
| <i>circSTXBP5L</i> | miR-627-3p          | 3 |
| <i>circSTXBP5L</i> | miR-627-5p          | 1 |
| <i>circSTXBP5L</i> | miR-631/3661        | 1 |
| <i>circSTXBP5L</i> | miR-635/6774-5p     | 2 |
| <i>circSTXBP5L</i> | miR-647             | 2 |
| <i>circSTXBP5L</i> | miR-6505-5p         | 3 |
| <i>circSTXBP5L</i> | miR-6507-3p         | 3 |
| <i>circSTXBP5L</i> | miR-6507-5p         | 3 |
| <i>circSTXBP5L</i> | miR-6512-5p         | 1 |
| <i>circSTXBP5L</i> | miR-659-5p          | 1 |
| <i>circSTXBP5L</i> | miR-664b-5p         | 1 |
| <i>circSTXBP5L</i> | miR-670-3p          | 1 |
| <i>circSTXBP5L</i> | miR-6715b-3p        | 2 |
| <i>circSTXBP5L</i> | miR-6730-5p         | 2 |
| <i>circSTXBP5L</i> | miR-6738-3p         | 1 |
| <i>circSTXBP5L</i> | miR-6739-3p         | 1 |
| <i>circSTXBP5L</i> | miR-6744-5p         | 1 |
| <i>circSTXBP5L</i> | miR-6753-3p/7107-3p | 2 |
| <i>circSTXBP5L</i> | miR-6762-3p         | 2 |
| <i>circSTXBP5L</i> | miR-6764-3p/6824-3p | 1 |
| <i>circSTXBP5L</i> | miR-6780a-3p        | 1 |
| <i>circSTXBP5L</i> | miR-6819-3p/6877-3p | 1 |
| <i>circSTXBP5L</i> | miR-6828-3p         | 1 |
| <i>circSTXBP5L</i> | miR-6833-5p         | 4 |
| <i>circSTXBP5L</i> | miR-6842-3p         | 2 |
| <i>circSTXBP5L</i> | miR-6843-3p/6848-3p | 3 |
| <i>circSTXBP5L</i> | miR-6861-3p         | 1 |
| <i>circSTXBP5L</i> | miR-6870-3p         | 1 |
| <i>circSTXBP5L</i> | miR-6881-3p         | 1 |
| <i>circSTXBP5L</i> | miR-7111-3p         | 1 |

|                    |                                       |   |
|--------------------|---------------------------------------|---|
| <i>circSTXBP5L</i> | miR-7154-5p                           | 3 |
| <i>circSTXBP5L</i> | miR-7158-3p                           | 2 |
| <i>circSTXBP5L</i> | miR-767-3p                            | 1 |
| <i>circSTXBP5L</i> | miR-7844-5p                           | 2 |
| <i>circSTXBP5L</i> | miR-7851-3p                           | 1 |
| <i>circSTXBP5L</i> | miR-7977                              | 1 |
| <i>circSTXBP5L</i> | miR-8056                              | 1 |
| <i>circSTXBP5L</i> | miR-8060                              | 4 |
| <i>circSTXBP5L</i> | miR-8084                              | 1 |
| <i>circSTXBP5L</i> | miR-874-3p                            | 2 |
| <i>circSTXBP5L</i> | miR-889-5p                            | 2 |
| <i>circSTXBP5L</i> | miR-890                               | 3 |
| <i>circSTXBP5L</i> | miR-9-3p                              | 1 |
| <i>circSTXBP5L</i> | miR-924                               | 1 |
| <i>circSTXBP5L</i> | miR-937-5p                            | 1 |
| <i>circSTXBP5L</i> | let-7-5p/98-5p                        | 1 |
| <i>circSTXBP5L</i> | let-7a-3p/let-7b-3p/let-7f-1-3p/98-3p | 2 |
| <i>circSTXBP5L</i> | let-7f-2-3p/1185-3p                   | 2 |
| <i>circSTXBP5L</i> | miR-100-3p                            | 2 |
| <i>circSTXBP5L</i> | miR-105-5p                            | 3 |
| <i>circSTXBP5L</i> | miR-106a-3p                           | 1 |
| <i>circSTXBP5L</i> | miR-1183                              | 3 |
| <i>circSTXBP5L</i> | miR-1197                              | 2 |
| <i>circSTXBP5L</i> | miR-1200                              | 1 |
| <i>circSTXBP5L</i> | miR-1202/3972                         | 1 |
| <i>circSTXBP5L</i> | miR-1203                              | 1 |
| <i>circSTXBP5L</i> | miR-1224-3p                           | 1 |
| <i>circSTXBP5L</i> | miR-1226-3p                           | 1 |
| <i>circSTXBP5L</i> | miR-1227-3p                           | 1 |
| <i>circSTXBP5L</i> | miR-1229-3p                           | 1 |
| <i>circSTXBP5L</i> | miR-1233-5p/6778-5p                   | 1 |
| <i>circSTXBP5L</i> | miR-1236-3p                           | 1 |
| <i>circSTXBP5L</i> | miR-1237-3p                           | 1 |
| <i>circSTXBP5L</i> | miR-1238-5p/4758-5p                   | 1 |
| <i>circSTXBP5L</i> | miR-124-3p.1                          | 3 |
| <i>circSTXBP5L</i> | miR-124-5p                            | 1 |
| <i>circSTXBP5L</i> | miR-1244                              | 1 |
| <i>circSTXBP5L</i> | miR-1246                              | 2 |

|                    |                    |   |
|--------------------|--------------------|---|
| <i>circSTXBP5L</i> | miR-1248           | 1 |
| <i>circSTXBP5L</i> | miR-1251-3p        | 2 |
| <i>circSTXBP5L</i> | miR-1253           | 1 |
| <i>circSTXBP5L</i> | miR-1255b-2-3p     | 1 |
| <i>circSTXBP5L</i> | miR-126-5p         | 1 |
| <i>circSTXBP5L</i> | miR-1263           | 1 |
| <i>circSTXBP5L</i> | miR-1265           | 1 |
| <i>circSTXBP5L</i> | miR-1268a/1268b    | 1 |
| <i>circSTXBP5L</i> | miR-1273e          | 2 |
| <i>circSTXBP5L</i> | miR-1273g-3p       | 1 |
| <i>circSTXBP5L</i> | miR-1275/4665-5p   | 2 |
| <i>circSTXBP5L</i> | miR-1277-5p        | 1 |
| <i>circSTXBP5L</i> | miR-1278           | 2 |
| <i>circSTXBP5L</i> | miR-1279           | 1 |
| <i>circSTXBP5L</i> | miR-128-3p         | 1 |
| <i>circSTXBP5L</i> | miR-1283           | 2 |
| <i>circSTXBP5L</i> | miR-1287-3p        | 1 |
| <i>circSTXBP5L</i> | miR-1288-5p        | 3 |
| <i>circSTXBP5L</i> | miR-129-3p         | 1 |
| <i>circSTXBP5L</i> | miR-129-5p         | 2 |
| <i>circSTXBP5L</i> | miR-1290           | 1 |
| <i>circSTXBP5L</i> | miR-1296-3p        | 1 |
| <i>circSTXBP5L</i> | miR-1296-5p        | 1 |
| <i>circSTXBP5L</i> | miR-1302/4298      | 1 |
| <i>circSTXBP5L</i> | miR-1304-3p        | 1 |
| <i>circSTXBP5L</i> | miR-1323           | 1 |
| <i>circSTXBP5L</i> | miR-1324           | 1 |
| <i>circSTXBP5L</i> | miR-133a-3p.2/133b | 1 |
| <i>circSTXBP5L</i> | miR-134-3p         | 1 |
| <i>circSTXBP5L</i> | miR-1343-3p        | 1 |
| <i>circSTXBP5L</i> | miR-135a-3p        | 2 |
| <i>circSTXBP5L</i> | miR-135b-3p        | 1 |
| <i>circSTXBP5L</i> | miR-140-3p.1       | 1 |
| <i>circSTXBP5L</i> | miR-140-3p.2       | 1 |
| <i>circSTXBP5L</i> | miR-141-5p         | 2 |
| <i>circSTXBP5L</i> | miR-145-5p         | 1 |
| <i>circSTXBP5L</i> | miR-147a           | 1 |
| <i>circSTXBP5L</i> | miR-149-5p         | 1 |

|                    |                                     |   |
|--------------------|-------------------------------------|---|
| <i>circSTXBP5L</i> | miR-150-3p                          | 1 |
| <i>circSTXBP5L</i> | miR-152-5p                          | 1 |
| <i>circSTXBP5L</i> | miR-153-5p                          | 3 |
| <i>circSTXBP5L</i> | miR-15b-3p                          | 2 |
| <i>circSTXBP5L</i> | miR-17-5p/20-5p/93-5p/106-5p/519-3p | 1 |
| <i>circSTXBP5L</i> | miR-181-3p/4420                     | 1 |
| <i>circSTXBP5L</i> | miR-182-3p                          | 1 |
| <i>circSTXBP5L</i> | miR-1825                            | 1 |
| <i>circSTXBP5L</i> | miR-183-3p                          | 3 |
| <i>circSTXBP5L</i> | miR-183-5p.1                        | 3 |
| <i>circSTXBP5L</i> | miR-18a-3p                          | 1 |
| <i>circSTXBP5L</i> | miR-190-5p                          | 4 |
| <i>circSTXBP5L</i> | miR-190a-3p                         | 2 |
| <i>circSTXBP5L</i> | miR-193-3p                          | 1 |
| <i>circSTXBP5L</i> | miR-194-5p                          | 1 |
| <i>circSTXBP5L</i> | miR-196b-3p                         | 2 |
| <i>circSTXBP5L</i> | miR-197-3p                          | 1 |
| <i>circSTXBP5L</i> | miR-198                             | 1 |
| <i>circSTXBP5L</i> | miR-199-5p                          | 1 |
| <i>circSTXBP5L</i> | miR-200ab-5p                        | 1 |
| <i>circSTXBP5L</i> | miR-202-5p                          | 1 |
| <i>circSTXBP5L</i> | miR-203a-3p.1                       | 1 |
| <i>circSTXBP5L</i> | miR-203b-5p/6718-5p                 | 1 |
| <i>circSTXBP5L</i> | miR-2054                            | 2 |
| <i>circSTXBP5L</i> | miR-208-5p                          | 1 |
| <i>circSTXBP5L</i> | miR-20b-3p                          | 1 |
| <i>circSTXBP5L</i> | miR-21-5p/590-5p                    | 1 |
| <i>circSTXBP5L</i> | miR-2113                            | 2 |
| <i>circSTXBP5L</i> | miR-2116-5p                         | 1 |
| <i>circSTXBP5L</i> | miR-216a-5p                         | 2 |
| <i>circSTXBP5L</i> | miR-216b-5p                         | 2 |
| <i>circSTXBP5L</i> | miR-218-1-3p                        | 1 |
| <i>circSTXBP5L</i> | miR-218-2-3p                        | 1 |
| <i>circSTXBP5L</i> | miR-218-5p                          | 1 |
| <i>circSTXBP5L</i> | miR-22-5p                           | 1 |
| <i>circSTXBP5L</i> | miR-2276-3p                         | 1 |
| <i>circSTXBP5L</i> | miR-2277-3p                         | 2 |
| <i>circSTXBP5L</i> | miR-23-3p                           | 2 |



|                    |                                              |   |
|--------------------|----------------------------------------------|---|
| <i>circSTXBP5L</i> | miR-2355-5p                                  | 1 |
| <i>circSTXBP5L</i> | miR-2681-5p                                  | 1 |
| <i>circSTXBP5L</i> | miR-28-3p                                    | 2 |
| <i>circSTXBP5L</i> | miR-296-3p                                   | 1 |
| <i>circSTXBP5L</i> | miR-298                                      | 2 |
| <i>circSTXBP5L</i> | miR-299-5p                                   | 1 |
| <i>circSTXBP5L</i> | miR-29b-2-5p                                 | 1 |
| <i>circSTXBP5L</i> | miR-30-5p                                    | 3 |
| <i>circSTXBP5L</i> | miR-301a-5p/301b-5p                          | 1 |
| <i>circSTXBP5L</i> | miR-302b-5p/302d-5p                          | 1 |
| <i>circSTXBP5L</i> | miR-3064-3p                                  | 1 |
| <i>circSTXBP5L</i> | miR-3065-5p                                  | 1 |
| <i>circSTXBP5L</i> | miR-3074-3p                                  | 1 |
| <i>circSTXBP5L</i> | miR-30b-3p/1273h-5p/3689-3p/6779-5p/6780a-5p | 1 |
| <i>circSTXBP5L</i> | miR-30c-3p/6788-5p                           | 1 |
| <i>circSTXBP5L</i> | miR-31-3p                                    | 1 |
| <i>circSTXBP5L</i> | miR-3115                                     | 1 |
| <i>circSTXBP5L</i> | miR-3117-3p                                  | 1 |
| <i>circSTXBP5L</i> | miR-3120-3p                                  | 2 |
| <i>circSTXBP5L</i> | miR-3121-3p                                  | 2 |
| <i>circSTXBP5L</i> | miR-3122/3913-5p                             | 2 |
| <i>circSTXBP5L</i> | miR-3123                                     | 1 |
| <i>circSTXBP5L</i> | miR-3124-3p                                  | 1 |
| <i>circSTXBP5L</i> | miR-3129-3p/5583-5p                          | 1 |
| <i>circSTXBP5L</i> | miR-3134                                     | 1 |
| <i>circSTXBP5L</i> | miR-3137                                     | 1 |
| <i>circSTXBP5L</i> | miR-3138                                     | 1 |
| <i>circSTXBP5L</i> | miR-3145-3p                                  | 1 |
| <i>circSTXBP5L</i> | miR-3147                                     | 2 |
| <i>circSTXBP5L</i> | miR-3148                                     | 1 |
| <i>circSTXBP5L</i> | miR-3149                                     | 1 |
| <i>circSTXBP5L</i> | miR-3154                                     | 1 |
| <i>circSTXBP5L</i> | miR-3157-5p                                  | 1 |
| <i>circSTXBP5L</i> | miR-3159                                     | 1 |
| <i>circSTXBP5L</i> | miR-3163                                     | 3 |
| <i>circSTXBP5L</i> | miR-3166                                     | 1 |
| <i>circSTXBP5L</i> | miR-3170/6855-5p                             | 1 |
| <i>circSTXBP5L</i> | miR-3179                                     | 1 |

|                    |                           |   |
|--------------------|---------------------------|---|
| <i>circSTXBP5L</i> | miR-3185                  | 3 |
| <i>circSTXBP5L</i> | miR-3187-3p               | 1 |
| <i>circSTXBP5L</i> | miR-3189-5p               | 1 |
| <i>circSTXBP5L</i> | miR-32-3p                 | 1 |
| <i>circSTXBP5L</i> | miR-3201/4791             | 3 |
| <i>circSTXBP5L</i> | miR-3202                  | 1 |
| <i>circSTXBP5L</i> | miR-323a-5p               | 1 |
| <i>circSTXBP5L</i> | miR-323b-3p               | 2 |
| <i>circSTXBP5L</i> | miR-324-3p/1913           | 1 |
| <i>circSTXBP5L</i> | miR-330-3p.2              | 3 |
| <i>circSTXBP5L</i> | miR-331-5p                | 1 |
| <i>circSTXBP5L</i> | miR-337-3p                | 3 |
| <i>circSTXBP5L</i> | miR-33a-3p                | 2 |
| <i>circSTXBP5L</i> | miR-33b-3p/515-3p/519e-3p | 1 |
| <i>circSTXBP5L</i> | miR-340-5p                | 4 |
| <i>circSTXBP5L</i> | miR-342-5p/4664-5p        | 1 |
| <i>circSTXBP5L</i> | miR-3529-3p               | 1 |
| <i>circSTXBP5L</i> | miR-3607-3p               | 2 |
| <i>circSTXBP5L</i> | miR-3613-3p               | 1 |
| <i>circSTXBP5L</i> | miR-362-5p/500b-5p        | 1 |
| <i>circSTXBP5L</i> | miR-3622a-5p              | 1 |
| <i>circSTXBP5L</i> | miR-3622b-5p              | 1 |
| <i>circSTXBP5L</i> | miR-3650                  | 1 |
| <i>circSTXBP5L</i> | miR-3653-3p               | 3 |
| <i>circSTXBP5L</i> | miR-3658                  | 2 |
| <i>circSTXBP5L</i> | miR-3660/4526             | 1 |
| <i>circSTXBP5L</i> | miR-3662                  | 2 |
| <i>circSTXBP5L</i> | miR-3665                  | 1 |
| <i>circSTXBP5L</i> | miR-3671                  | 4 |
| <i>circSTXBP5L</i> | miR-3679-3p               | 1 |
| <i>circSTXBP5L</i> | miR-3680-3p               | 1 |
| <i>circSTXBP5L</i> | miR-3682-3p               | 1 |
| <i>circSTXBP5L</i> | miR-3682-5p               | 1 |
| <i>circSTXBP5L</i> | miR-3685                  | 1 |
| <i>circSTXBP5L</i> | miR-3686                  | 2 |
| <i>circSTXBP5L</i> | miR-3688-3p               | 2 |
| <i>circSTXBP5L</i> | miR-3713                  | 1 |
| <i>circSTXBP5L</i> | miR-3714                  | 3 |

|                    |                     |   |
|--------------------|---------------------|---|
| <i>circSTXBP5L</i> | miR-371a-3p         | 1 |
| <i>circSTXBP5L</i> | miR-371b-3p         | 1 |
| <i>circSTXBP5L</i> | miR-374-5p/655-3p   | 1 |
| <i>circSTXBP5L</i> | miR-374a-3p         | 1 |
| <i>circSTXBP5L</i> | miR-376-3p          | 1 |
| <i>circSTXBP5L</i> | miR-376c-3p         | 2 |
| <i>circSTXBP5L</i> | miR-378a-5p         | 1 |
| <i>circSTXBP5L</i> | miR-382-3p          | 1 |
| <i>circSTXBP5L</i> | miR-383-5p.2        | 2 |
| <i>circSTXBP5L</i> | miR-384             | 1 |
| <i>circSTXBP5L</i> | miR-3910            | 3 |
| <i>circSTXBP5L</i> | miR-3911            | 1 |
| <i>circSTXBP5L</i> | miR-3912-3p         | 1 |
| <i>circSTXBP5L</i> | miR-3912-5p         | 2 |
| <i>circSTXBP5L</i> | miR-3919            | 1 |
| <i>circSTXBP5L</i> | miR-3920            | 1 |
| <i>circSTXBP5L</i> | miR-3921/4653-5p    | 1 |
| <i>circSTXBP5L</i> | miR-3922-5p         | 1 |
| <i>circSTXBP5L</i> | miR-3924            | 1 |
| <i>circSTXBP5L</i> | miR-3925-3p         | 1 |
| <i>circSTXBP5L</i> | miR-3925-5p         | 1 |
| <i>circSTXBP5L</i> | miR-3927-5p         | 1 |
| <i>circSTXBP5L</i> | miR-3928-5p/6806-3p | 1 |
| <i>circSTXBP5L</i> | miR-3934-3p         | 1 |
| <i>circSTXBP5L</i> | miR-3940-5p/4507    | 1 |
| <i>circSTXBP5L</i> | miR-3942-3p         | 1 |
| <i>circSTXBP5L</i> | miR-3973            | 1 |
| <i>circSTXBP5L</i> | miR-409-3p          | 2 |
| <i>circSTXBP5L</i> | miR-410-3p          | 2 |
| <i>circSTXBP5L</i> | miR-411-3p          | 1 |
| <i>circSTXBP5L</i> | miR-411-5p.1        | 1 |
| <i>circSTXBP5L</i> | miR-421             | 2 |
| <i>circSTXBP5L</i> | miR-4252            | 1 |
| <i>circSTXBP5L</i> | miR-4255            | 1 |
| <i>circSTXBP5L</i> | miR-4256            | 1 |
| <i>circSTXBP5L</i> | miR-4260            | 2 |
| <i>circSTXBP5L</i> | miR-4261            | 1 |
| <i>circSTXBP5L</i> | miR-4263            | 1 |

|                    |                       |   |
|--------------------|-----------------------|---|
| <i>circSTXBP5L</i> | miR-4265/4296/4322    | 1 |
| <i>circSTXBP5L</i> | miR-4267              | 1 |
| <i>circSTXBP5L</i> | miR-4268              | 2 |
| <i>circSTXBP5L</i> | miR-4270/4441/6754-5p | 1 |
| <i>circSTXBP5L</i> | miR-4275              | 1 |
| <i>circSTXBP5L</i> | miR-4279              | 1 |
| <i>circSTXBP5L</i> | miR-4282              | 4 |
| <i>circSTXBP5L</i> | miR-4299              | 1 |
| <i>circSTXBP5L</i> | miR-4302              | 1 |
| <i>circSTXBP5L</i> | miR-4307              | 3 |
| <i>circSTXBP5L</i> | miR-431-5p            | 1 |
| <i>circSTXBP5L</i> | miR-4310/7157-5p      | 2 |
| <i>circSTXBP5L</i> | miR-4324              | 1 |
| <i>circSTXBP5L</i> | miR-4330              | 2 |
| <i>circSTXBP5L</i> | miR-4422              | 3 |
| <i>circSTXBP5L</i> | miR-4425              | 2 |
| <i>circSTXBP5L</i> | miR-4432              | 1 |
| <i>circSTXBP5L</i> | miR-4434/4516/5703    | 1 |
| <i>circSTXBP5L</i> | miR-4435              | 1 |
| <i>circSTXBP5L</i> | miR-4436b-5p          | 1 |
| <i>circSTXBP5L</i> | miR-4448              | 2 |
| <i>circSTXBP5L</i> | miR-4452              | 3 |
| <i>circSTXBP5L</i> | miR-4455              | 1 |
| <i>circSTXBP5L</i> | miR-4456              | 1 |
| <i>circSTXBP5L</i> | miR-4464/4748         | 1 |
| <i>circSTXBP5L</i> | miR-4473              | 1 |
| <i>circSTXBP5L</i> | miR-4475              | 2 |
| <i>circSTXBP5L</i> | miR-4476/6876-5p      | 2 |
| <i>circSTXBP5L</i> | miR-4481/4745-5p      | 1 |
| <i>circSTXBP5L</i> | miR-4484              | 1 |
| <i>circSTXBP5L</i> | miR-4493              | 1 |
| <i>circSTXBP5L</i> | miR-4494              | 1 |
| <i>circSTXBP5L</i> | miR-4495              | 3 |
| <i>circSTXBP5L</i> | miR-4501              | 1 |
| <i>circSTXBP5L</i> | miR-4502              | 2 |
| <i>circSTXBP5L</i> | miR-4504              | 2 |
| <i>circSTXBP5L</i> | miR-4509              | 1 |
| <i>circSTXBP5L</i> | miR-450a-1-3p         | 2 |

|                    |                          |   |
|--------------------|--------------------------|---|
| <i>circSTXBP5L</i> | miR-450a-2-3p            | 2 |
| <i>circSTXBP5L</i> | miR-450b-3p/769-3p       | 2 |
| <i>circSTXBP5L</i> | miR-450b-5p              | 1 |
| <i>circSTXBP5L</i> | miR-4511                 | 2 |
| <i>circSTXBP5L</i> | miR-4520-3p              | 1 |
| <i>circSTXBP5L</i> | miR-4528                 | 1 |
| <i>circSTXBP5L</i> | miR-4533                 | 1 |
| <i>circSTXBP5L</i> | miR-4534/8082            | 1 |
| <i>circSTXBP5L</i> | miR-4536-5p              | 2 |
| <i>circSTXBP5L</i> | miR-4635                 | 1 |
| <i>circSTXBP5L</i> | miR-4645-3p              | 1 |
| <i>circSTXBP5L</i> | miR-4648                 | 1 |
| <i>circSTXBP5L</i> | miR-4654/4769-5p         | 1 |
| <i>circSTXBP5L</i> | miR-4658/6790-5p         | 1 |
| <i>circSTXBP5L</i> | miR-4659a-3p/4659b-3p    | 2 |
| <i>circSTXBP5L</i> | miR-4659a-5p/4659b-5p    | 1 |
| <i>circSTXBP5L</i> | miR-466                  | 1 |
| <i>circSTXBP5L</i> | miR-4661-5p              | 1 |
| <i>circSTXBP5L</i> | miR-4662-5p              | 1 |
| <i>circSTXBP5L</i> | miR-4666b                | 2 |
| <i>circSTXBP5L</i> | miR-4667-5p/4700-5p/8089 | 1 |
| <i>circSTXBP5L</i> | miR-4668-3p              | 1 |
| <i>circSTXBP5L</i> | miR-4671-3p              | 1 |
| <i>circSTXBP5L</i> | miR-4678                 | 1 |
| <i>circSTXBP5L</i> | miR-4680-5p              | 1 |
| <i>circSTXBP5L</i> | miR-4682                 | 1 |
| <i>circSTXBP5L</i> | miR-4684-3p              | 1 |
| <i>circSTXBP5L</i> | miR-4684-5p              | 3 |
| <i>circSTXBP5L</i> | miR-4686                 | 1 |
| <i>circSTXBP5L</i> | miR-4687-5p              | 1 |
| <i>circSTXBP5L</i> | miR-4690-3p/5685         | 2 |
| <i>circSTXBP5L</i> | miR-4691-5p/6792-3p      | 1 |
| <i>circSTXBP5L</i> | miR-4693-5p              | 2 |
| <i>circSTXBP5L</i> | miR-4694-3p              | 3 |
| <i>circSTXBP5L</i> | miR-4698                 | 1 |
| <i>circSTXBP5L</i> | miR-4709-5p              | 2 |
| <i>circSTXBP5L</i> | miR-4712-3p              | 1 |
| <i>circSTXBP5L</i> | miR-4713-3p              | 1 |

|                    |                     |   |
|--------------------|---------------------|---|
| <i>circSTXBP5L</i> | miR-4714-3p         | 1 |
| <i>circSTXBP5L</i> | miR-4716-5p         | 2 |
| <i>circSTXBP5L</i> | miR-4724-5p         | 1 |
| <i>circSTXBP5L</i> | miR-4727-5p         | 1 |
| <i>circSTXBP5L</i> | miR-4728-3p         | 1 |
| <i>circSTXBP5L</i> | miR-4731-5p         | 1 |
| <i>circSTXBP5L</i> | miR-4733-3p         | 1 |
| <i>circSTXBP5L</i> | miR-4738-3p         | 2 |
| <i>circSTXBP5L</i> | miR-4742-3p         | 1 |
| <i>circSTXBP5L</i> | miR-4744            | 1 |
| <i>circSTXBP5L</i> | miR-4747-5p/5196-5p | 1 |
| <i>circSTXBP5L</i> | miR-4751            | 1 |
| <i>circSTXBP5L</i> | miR-4756-3p         | 1 |
| <i>circSTXBP5L</i> | miR-4758-3p         | 1 |
| <i>circSTXBP5L</i> | miR-4760-3p         | 2 |
| <i>circSTXBP5L</i> | miR-4761-5p         | 2 |
| <i>circSTXBP5L</i> | miR-4762-3p         | 1 |
| <i>circSTXBP5L</i> | miR-4762-5p         | 1 |
| <i>circSTXBP5L</i> | miR-4764-3p         | 1 |
| <i>circSTXBP5L</i> | miR-4764-5p         | 2 |
| <i>circSTXBP5L</i> | miR-4766-5p         | 1 |
| <i>circSTXBP5L</i> | miR-4768-5p/6833-3p | 2 |
| <i>circSTXBP5L</i> | miR-4771            | 1 |
| <i>circSTXBP5L</i> | miR-4772-3p         | 1 |
| <i>circSTXBP5L</i> | miR-4773            | 1 |
| <i>circSTXBP5L</i> | miR-4775            | 3 |
| <i>circSTXBP5L</i> | miR-4776-3p         | 1 |
| <i>circSTXBP5L</i> | miR-4777-5p         | 1 |
| <i>circSTXBP5L</i> | miR-4781-3p         | 2 |
| <i>circSTXBP5L</i> | miR-4789-5p         | 2 |
| <i>circSTXBP5L</i> | miR-4793-5p         | 1 |
| <i>circSTXBP5L</i> | miR-4795-3p         | 5 |
| <i>circSTXBP5L</i> | miR-4799-5p         | 3 |
| <i>circSTXBP5L</i> | miR-4800-5p         | 1 |
| <i>circSTXBP5L</i> | miR-4802-5p         | 1 |
| <i>circSTXBP5L</i> | miR-483-3p.1        | 2 |
| <i>circSTXBP5L</i> | miR-483-3p.2        | 1 |
| <i>circSTXBP5L</i> | miR-486-5p          | 1 |

|                    |                             |   |
|--------------------|-----------------------------|---|
| <i>circSTXBP5L</i> | miR-487-3p                  | 1 |
| <i>circSTXBP5L</i> | miR-487a-5p/487b-5p         | 1 |
| <i>circSTXBP5L</i> | miR-488-5p                  | 1 |
| <i>circSTXBP5L</i> | miR-489-3p                  | 2 |
| <i>circSTXBP5L</i> | miR-490-3p                  | 1 |
| <i>circSTXBP5L</i> | miR-491-3p                  | 1 |
| <i>circSTXBP5L</i> | miR-494-3p                  | 1 |
| <i>circSTXBP5L</i> | miR-496.1                   | 1 |
| <i>circSTXBP5L</i> | miR-4999-3p                 | 1 |
| <i>circSTXBP5L</i> | miR-499b-5p                 | 1 |
| <i>circSTXBP5L</i> | miR-5001-3p                 | 1 |
| <i>circSTXBP5L</i> | miR-5002-5p                 | 1 |
| <i>circSTXBP5L</i> | miR-5003-3p                 | 3 |
| <i>circSTXBP5L</i> | miR-5004-3p                 | 1 |
| <i>circSTXBP5L</i> | miR-5004-5p                 | 1 |
| <i>circSTXBP5L</i> | miR-5006-5p                 | 1 |
| <i>circSTXBP5L</i> | miR-5007-3p                 | 1 |
| <i>circSTXBP5L</i> | miR-5008-3p/6737-3p/7157-3p | 1 |
| <i>circSTXBP5L</i> | miR-5009-3p                 | 1 |
| <i>circSTXBP5L</i> | miR-500a-5p                 | 3 |
| <i>circSTXBP5L</i> | miR-500b-3p                 | 1 |
| <i>circSTXBP5L</i> | miR-501-5p                  | 1 |
| <i>circSTXBP5L</i> | miR-5010-3p                 | 2 |
| <i>circSTXBP5L</i> | miR-5011-3p                 | 2 |
| <i>circSTXBP5L</i> | miR-5011-5p                 | 3 |
| <i>circSTXBP5L</i> | miR-502-5p                  | 1 |
| <i>circSTXBP5L</i> | miR-504-3p                  | 1 |
| <i>circSTXBP5L</i> | miR-505-3p.2                | 2 |
| <i>circSTXBP5L</i> | miR-506-5p                  | 1 |
| <i>circSTXBP5L</i> | miR-507/557                 | 1 |
| <i>circSTXBP5L</i> | miR-5089-5p                 | 2 |
| <i>circSTXBP5L</i> | miR-509-3p                  | 2 |
| <i>circSTXBP5L</i> | miR-5096                    | 1 |
| <i>circSTXBP5L</i> | miR-510-3p                  | 2 |
| <i>circSTXBP5L</i> | miR-5100                    | 3 |
| <i>circSTXBP5L</i> | miR-512-5p                  | 1 |
| <i>circSTXBP5L</i> | miR-513a-3p/513c-3p/3606-3p | 2 |
| <i>circSTXBP5L</i> | miR-513b-3p                 | 2 |

|                    |                                                                  |   |
|--------------------|------------------------------------------------------------------|---|
| <i>circSTXBP5L</i> | miR-513c-5p/514b-5p                                              | 1 |
| <i>circSTXBP5L</i> | miR-515-5p/519e-5p                                               | 1 |
| <i>circSTXBP5L</i> | miR-5187-5p                                                      | 2 |
| <i>circSTXBP5L</i> | miR-518a-5p/527                                                  | 1 |
| <i>circSTXBP5L</i> | miR-518d-5p/519-5p                                               | 1 |
| <i>circSTXBP5L</i> | miR-5196-3p                                                      | 1 |
| <i>circSTXBP5L</i> | miR-5197-3p                                                      | 1 |
| <i>circSTXBP5L</i> | miR-519d-5p                                                      | 1 |
| <i>circSTXBP5L</i> | miR-520f-5p                                                      | 3 |
| <i>circSTXBP5L</i> | miR-520g-3p                                                      | 1 |
| <i>circSTXBP5L</i> | miR-522-3p                                                       | 3 |
| <i>circSTXBP5L</i> | miR-524-5p                                                       | 3 |
| <i>circSTXBP5L</i> | miR-526b-5p                                                      | 1 |
| <i>circSTXBP5L</i> | miR-541-5p                                                       | 2 |
| <i>circSTXBP5L</i> | miR-542-3p                                                       | 2 |
| <i>circSTXBP5L</i> | miR-543                                                          | 1 |
| <i>circSTXBP5L</i> | miR-544b                                                         | 1 |
| <i>circSTXBP5L</i> | miR-545-3p                                                       | 2 |
| <i>circSTXBP5L</i> | miR-545-5p                                                       | 1 |
| <i>circSTXBP5L</i> | miR-548ah-5p/3609                                                | 1 |
| <i>circSTXBP5L</i> | miR-548an                                                        | 1 |
| <i>circSTXBP5L</i> | miR-548ao-5p/548ax                                               | 3 |
| <i>circSTXBP5L</i> | miR-548ap-3p/548aa/548t-3p                                       | 2 |
| <i>circSTXBP5L</i> | miR-548as-3p                                                     | 2 |
| <i>circSTXBP5L</i> | miR-548at-5p                                                     | 2 |
| <i>circSTXBP5L</i> | miR-548av-3p                                                     | 3 |
| <i>circSTXBP5L</i> | miR-548av-5p/548k/8054                                           | 5 |
| <i>circSTXBP5L</i> | miR-548aw                                                        | 1 |
| <i>circSTXBP5L</i> | miR-548ay-3p/548at-3p                                            | 2 |
| <i>circSTXBP5L</i> | miR-548ay-5p/548au-5p/548as-5p/548ar-5p/548aq-5p/548ap-5p/548am- | 5 |
| <i>circSTXBP5L</i> | miR-548az-5p/548t-5p                                             | 3 |
| <i>circSTXBP5L</i> | miR-548b-3p                                                      | 2 |
| <i>circSTXBP5L</i> | miR-548c-3p                                                      | 2 |
| <i>circSTXBP5L</i> | miR-548e-5p                                                      | 1 |
| <i>circSTXBP5L</i> | miR-548g-3p                                                      | 1 |
| <i>circSTXBP5L</i> | miR-548l                                                         | 5 |
| <i>circSTXBP5L</i> | miR-548n                                                         | 3 |
| <i>circSTXBP5L</i> | miR-548q                                                         | 1 |



|                    |                  |   |
|--------------------|------------------|---|
| <i>circSTXBP5L</i> | miR-548s         | 1 |
| <i>circSTXBP5L</i> | miR-548u/7161-5p | 1 |
| <i>circSTXBP5L</i> | miR-550b-3p      | 2 |
| <i>circSTXBP5L</i> | miR-556-3p       | 3 |
| <i>circSTXBP5L</i> | miR-5571-5p      | 1 |
| <i>circSTXBP5L</i> | miR-5572         | 2 |
| <i>circSTXBP5L</i> | miR-5579-5p      | 2 |
| <i>circSTXBP5L</i> | miR-5581-3p      | 3 |
| <i>circSTXBP5L</i> | miR-5582-5p      | 1 |
| <i>circSTXBP5L</i> | miR-5584-5p      | 1 |
| <i>circSTXBP5L</i> | miR-5585-5p      | 3 |
| <i>circSTXBP5L</i> | miR-5589-5p      | 1 |
| <i>circSTXBP5L</i> | miR-5590-5p      | 1 |
| <i>circSTXBP5L</i> | miR-5591-3p      | 1 |
| <i>circSTXBP5L</i> | miR-561-3p       | 2 |
| <i>circSTXBP5L</i> | miR-561-5p       | 1 |
| <i>circSTXBP5L</i> | miR-562          | 2 |
| <i>circSTXBP5L</i> | miR-567          | 1 |
| <i>circSTXBP5L</i> | miR-568          | 1 |
| <i>circSTXBP5L</i> | miR-5680         | 3 |
| <i>circSTXBP5L</i> | miR-5683         | 1 |
| <i>circSTXBP5L</i> | miR-5687         | 2 |
| <i>circSTXBP5L</i> | miR-5689         | 1 |
| <i>circSTXBP5L</i> | miR-569          | 1 |
| <i>circSTXBP5L</i> | miR-5690         | 1 |
| <i>circSTXBP5L</i> | miR-5692a        | 7 |
| <i>circSTXBP5L</i> | miR-5694         | 2 |
| <i>circSTXBP5L</i> | miR-5695         | 1 |
| <i>circSTXBP5L</i> | miR-5696         | 3 |
| <i>circSTXBP5L</i> | miR-5697         | 1 |
| <i>circSTXBP5L</i> | miR-5699-5p      | 1 |
| <i>circSTXBP5L</i> | miR-570-3p       | 3 |
| <i>circSTXBP5L</i> | miR-574-3p       | 1 |
| <i>circSTXBP5L</i> | miR-576-5p       | 1 |
| <i>circSTXBP5L</i> | miR-578          | 1 |
| <i>circSTXBP5L</i> | miR-579-3p       | 3 |
| <i>circSTXBP5L</i> | miR-580-3p       | 1 |
| <i>circSTXBP5L</i> | miR-580-5p       | 1 |

|                    |                  |   |
|--------------------|------------------|---|
| <i>circSTXBP5L</i> | miR-581          | 1 |
| <i>circSTXBP5L</i> | miR-582-3p       | 1 |
| <i>circSTXBP5L</i> | miR-584-5p       | 2 |
| <i>circSTXBP5L</i> | miR-585-3p       | 1 |
| <i>circSTXBP5L</i> | miR-586          | 1 |
| <i>circSTXBP5L</i> | miR-588          | 1 |
| <i>circSTXBP5L</i> | miR-589-3p       | 2 |
| <i>circSTXBP5L</i> | miR-590-3p       | 1 |
| <i>circSTXBP5L</i> | miR-592          | 1 |
| <i>circSTXBP5L</i> | miR-597-3p       | 1 |
| <i>circSTXBP5L</i> | miR-597-5p       | 1 |
| <i>circSTXBP5L</i> | miR-599          | 1 |
| <i>circSTXBP5L</i> | miR-605-3p       | 1 |
| <i>circSTXBP5L</i> | miR-605-5p       | 3 |
| <i>circSTXBP5L</i> | miR-607          | 1 |
| <i>circSTXBP5L</i> | miR-6076/6797-3p | 3 |
| <i>circSTXBP5L</i> | miR-6077         | 2 |
| <i>circSTXBP5L</i> | miR-6079         | 2 |
| <i>circSTXBP5L</i> | miR-608/4651     | 1 |
| <i>circSTXBP5L</i> | miR-6081         | 1 |
| <i>circSTXBP5L</i> | miR-6083         | 1 |
| <i>circSTXBP5L</i> | miR-609          | 1 |
| <i>circSTXBP5L</i> | miR-6124         | 1 |
| <i>circSTXBP5L</i> | miR-622          | 2 |
| <i>circSTXBP5L</i> | miR-625-3p       | 1 |
| <i>circSTXBP5L</i> | miR-629-3p       | 1 |
| <i>circSTXBP5L</i> | miR-630          | 1 |
| <i>circSTXBP5L</i> | miR-633          | 2 |
| <i>circSTXBP5L</i> | miR-634          | 1 |
| <i>circSTXBP5L</i> | miR-637          | 1 |
| <i>circSTXBP5L</i> | miR-638          | 1 |
| <i>circSTXBP5L</i> | miR-639          | 1 |
| <i>circSTXBP5L</i> | miR-640          | 1 |
| <i>circSTXBP5L</i> | miR-643          | 1 |
| <i>circSTXBP5L</i> | miR-644a         | 1 |
| <i>circSTXBP5L</i> | miR-649          | 1 |
| <i>circSTXBP5L</i> | miR-6504-3p      | 2 |
| <i>circSTXBP5L</i> | miR-6508-5p/8067 | 2 |

|                    |                             |   |
|--------------------|-----------------------------|---|
| <i>circSTXBP5L</i> | miR-6509-3p                 | 1 |
| <i>circSTXBP5L</i> | miR-6509-5p                 | 1 |
| <i>circSTXBP5L</i> | miR-651-3p                  | 1 |
| <i>circSTXBP5L</i> | miR-651-5p                  | 1 |
| <i>circSTXBP5L</i> | miR-6511-5p                 | 1 |
| <i>circSTXBP5L</i> | miR-6513-3p                 | 1 |
| <i>circSTXBP5L</i> | miR-6513-5p                 | 2 |
| <i>circSTXBP5L</i> | miR-6514-5p                 | 1 |
| <i>circSTXBP5L</i> | miR-6515-3p                 | 1 |
| <i>circSTXBP5L</i> | miR-6516-5p                 | 2 |
| <i>circSTXBP5L</i> | miR-653-3p                  | 1 |
| <i>circSTXBP5L</i> | miR-656-3p                  | 4 |
| <i>circSTXBP5L</i> | miR-657                     | 1 |
| <i>circSTXBP5L</i> | miR-659-3p                  | 2 |
| <i>circSTXBP5L</i> | miR-660-5p                  | 1 |
| <i>circSTXBP5L</i> | miR-664a-3p                 | 2 |
| <i>circSTXBP5L</i> | miR-664a-5p/4794            | 1 |
| <i>circSTXBP5L</i> | miR-665                     | 1 |
| <i>circSTXBP5L</i> | miR-6719-3p                 | 1 |
| <i>circSTXBP5L</i> | miR-6728-3p                 | 1 |
| <i>circSTXBP5L</i> | miR-6728-5p                 | 2 |
| <i>circSTXBP5L</i> | miR-6730-3p                 | 1 |
| <i>circSTXBP5L</i> | miR-6731-5p/8085            | 1 |
| <i>circSTXBP5L</i> | miR-6733-3p                 | 1 |
| <i>circSTXBP5L</i> | miR-6737-5p/6812-5p/6819-5p | 1 |
| <i>circSTXBP5L</i> | miR-6740-3p                 | 2 |
| <i>circSTXBP5L</i> | miR-6740-5p                 | 1 |
| <i>circSTXBP5L</i> | miR-6747-5p                 | 1 |
| <i>circSTXBP5L</i> | miR-6748-5p                 | 1 |
| <i>circSTXBP5L</i> | miR-6749-3p                 | 1 |
| <i>circSTXBP5L</i> | miR-6750-3p                 | 1 |
| <i>circSTXBP5L</i> | miR-6750-5p/6822-5p         | 1 |
| <i>circSTXBP5L</i> | miR-6751-5p/6803-5p         | 2 |
| <i>circSTXBP5L</i> | miR-6752-5p/6842-5p/7110-5p | 2 |
| <i>circSTXBP5L</i> | miR-6757-5p                 | 2 |
| <i>circSTXBP5L</i> | miR-6758-3p                 | 1 |
| <i>circSTXBP5L</i> | miR-6759-5p                 | 1 |
| <i>circSTXBP5L</i> | miR-676-3p                  | 2 |

|                    |                     |   |
|--------------------|---------------------|---|
| <i>circSTXBP5L</i> | miR-676-5p          | 1 |
| <i>circSTXBP5L</i> | miR-6768-3p         | 1 |
| <i>circSTXBP5L</i> | miR-6770-5p         | 1 |
| <i>circSTXBP5L</i> | miR-6772-3p         | 1 |
| <i>circSTXBP5L</i> | miR-6772-5p         | 1 |
| <i>circSTXBP5L</i> | miR-6776-3p         | 1 |
| <i>circSTXBP5L</i> | miR-6777-3p         | 1 |
| <i>circSTXBP5L</i> | miR-6779-3p         | 1 |
| <i>circSTXBP5L</i> | miR-6787-3p         | 1 |
| <i>circSTXBP5L</i> | miR-6792-5p         | 1 |
| <i>circSTXBP5L</i> | miR-6793-5p         | 1 |
| <i>circSTXBP5L</i> | miR-6796-3p         | 1 |
| <i>circSTXBP5L</i> | miR-6796-5p         | 1 |
| <i>circSTXBP5L</i> | miR-6800-5p         | 1 |
| <i>circSTXBP5L</i> | miR-6802-3p         | 1 |
| <i>circSTXBP5L</i> | miR-6802-5p         | 1 |
| <i>circSTXBP5L</i> | miR-6808-3p         | 1 |
| <i>circSTXBP5L</i> | miR-6809-3p         | 2 |
| <i>circSTXBP5L</i> | miR-6814-5p         | 1 |
| <i>circSTXBP5L</i> | miR-6815-5p/6865-5p | 1 |
| <i>circSTXBP5L</i> | miR-6817-3p         | 1 |
| <i>circSTXBP5L</i> | miR-6818-5p         | 1 |
| <i>circSTXBP5L</i> | miR-6826-3p         | 1 |
| <i>circSTXBP5L</i> | miR-6826-5p         | 1 |
| <i>circSTXBP5L</i> | miR-6831-3p         | 1 |
| <i>circSTXBP5L</i> | miR-6834-3p         | 3 |
| <i>circSTXBP5L</i> | miR-6835-5p         | 2 |
| <i>circSTXBP5L</i> | miR-6839-3p         | 1 |
| <i>circSTXBP5L</i> | miR-6844            | 1 |
| <i>circSTXBP5L</i> | miR-6847-3p         | 1 |
| <i>circSTXBP5L</i> | miR-6854-3p         | 1 |
| <i>circSTXBP5L</i> | miR-6854-5p         | 1 |
| <i>circSTXBP5L</i> | miR-6856-3p         | 1 |
| <i>circSTXBP5L</i> | miR-6867-5p         | 1 |
| <i>circSTXBP5L</i> | miR-6868-3p         | 1 |
| <i>circSTXBP5L</i> | miR-6869-5p         | 1 |
| <i>circSTXBP5L</i> | miR-6871-5p         | 1 |
| <i>circSTXBP5L</i> | miR-6872-3p         | 1 |

|                    |             |   |
|--------------------|-------------|---|
| <i>circSTXBP5L</i> | miR-6873-3p | 2 |
| <i>circSTXBP5L</i> | miR-6874-5p | 1 |
| <i>circSTXBP5L</i> | miR-6875-3p | 2 |
| <i>circSTXBP5L</i> | miR-6878-5p | 1 |
| <i>circSTXBP5L</i> | miR-6879-3p | 1 |
| <i>circSTXBP5L</i> | miR-6881-5p | 1 |
| <i>circSTXBP5L</i> | miR-6882-5p | 1 |
| <i>circSTXBP5L</i> | miR-6886-3p | 1 |
| <i>circSTXBP5L</i> | miR-6889-3p | 1 |
| <i>circSTXBP5L</i> | miR-6894-5p | 1 |
| <i>circSTXBP5L</i> | miR-7-3p    | 1 |
| <i>circSTXBP5L</i> | miR-7-5p    | 2 |
| <i>circSTXBP5L</i> | miR-7109-5p | 2 |
| <i>circSTXBP5L</i> | miR-7110-3p | 1 |
| <i>circSTXBP5L</i> | miR-7150    | 2 |
| <i>circSTXBP5L</i> | miR-7151-5p | 2 |
| <i>circSTXBP5L</i> | miR-7153-3p | 1 |
| <i>circSTXBP5L</i> | miR-7154-3p | 1 |
| <i>circSTXBP5L</i> | miR-7155-5p | 1 |
| <i>circSTXBP5L</i> | miR-7159-5p | 2 |
| <i>circSTXBP5L</i> | miR-7161-3p | 1 |
| <i>circSTXBP5L</i> | miR-744-3p  | 1 |
| <i>circSTXBP5L</i> | miR-7515    | 1 |
| <i>circSTXBP5L</i> | miR-758-3p  | 1 |
| <i>circSTXBP5L</i> | miR-764     | 1 |
| <i>circSTXBP5L</i> | miR-7641    | 1 |
| <i>circSTXBP5L</i> | miR-765     | 1 |
| <i>circSTXBP5L</i> | miR-766-3p  | 1 |
| <i>circSTXBP5L</i> | miR-766-5p  | 1 |
| <i>circSTXBP5L</i> | miR-7705    | 1 |
| <i>circSTXBP5L</i> | miR-7850-5p | 1 |
| <i>circSTXBP5L</i> | miR-7855-5p | 1 |
| <i>circSTXBP5L</i> | miR-7856-5p | 1 |
| <i>circSTXBP5L</i> | miR-7978    | 1 |
| <i>circSTXBP5L</i> | miR-802     | 1 |
| <i>circSTXBP5L</i> | miR-8055    | 1 |
| <i>circSTXBP5L</i> | miR-8057    | 1 |
| <i>circSTXBP5L</i> | miR-8063    | 1 |

|                    |                   |   |
|--------------------|-------------------|---|
| <i>circSTXBP5L</i> | miR-8065          | 1 |
| <i>circSTXBP5L</i> | miR-8066          | 2 |
| <i>circSTXBP5L</i> | miR-8068          | 1 |
| <i>circSTXBP5L</i> | miR-8069          | 1 |
| <i>circSTXBP5L</i> | miR-8070          | 1 |
| <i>circSTXBP5L</i> | miR-8076          | 3 |
| <i>circSTXBP5L</i> | miR-8078          | 1 |
| <i>circSTXBP5L</i> | miR-8087          | 1 |
| <i>circSTXBP5L</i> | miR-876-3p        | 1 |
| <i>circSTXBP5L</i> | miR-876-5p        | 1 |
| <i>circSTXBP5L</i> | miR-885-5p        | 3 |
| <i>circSTXBP5L</i> | miR-887-5p        | 2 |
| <i>circSTXBP5L</i> | miR-889-3p        | 1 |
| <i>circSTXBP5L</i> | miR-892-5p        | 1 |
| <i>circSTXBP5L</i> | miR-892b          | 1 |
| <i>circSTXBP5L</i> | miR-92a-1-5p      | 2 |
| <i>circSTXBP5L</i> | miR-938           | 1 |
| <i>circSTXBP5L</i> | miR-942-5p        | 2 |
| <i>circSTXBP5L</i> | miR-944           | 1 |
| <i>circSTXBP5L</i> | miR-95-5p         | 2 |
| <i>circSTXBP5L</i> | miR-9500          | 1 |
| <i>circSTXBP5L</i> | miR-99-3p         | 1 |
| <i>circSTXBP5L</i> | miR-4703-3p       | 1 |
| <i>circSTXBP5L</i> | miR-1193          | 1 |
| <i>circSTXBP5L</i> | miR-1231          | 1 |
| <i>circSTXBP5L</i> | miR-1247-3p       | 1 |
| <i>circSTXBP5L</i> | miR-1269          | 1 |
| <i>circSTXBP5L</i> | miR-127-3p        | 1 |
| <i>circSTXBP5L</i> | miR-1273d         | 1 |
| <i>circSTXBP5L</i> | miR-1273g-5p      | 1 |
| <i>circSTXBP5L</i> | miR-1288-3p       | 1 |
| <i>circSTXBP5L</i> | miR-1292-5p       | 1 |
| <i>circSTXBP5L</i> | miR-1298-5p       | 1 |
| <i>circSTXBP5L</i> | miR-1301-3p       | 1 |
| <i>circSTXBP5L</i> | miR-132-3p/212-3p | 1 |
| <i>circSTXBP5L</i> | miR-132-5p        | 1 |
| <i>circSTXBP5L</i> | miR-133a-3p.1     | 1 |
| <i>circSTXBP5L</i> | miR-133a-5p       | 1 |

|                    |                                     |   |
|--------------------|-------------------------------------|---|
| <i>circSTXBP5L</i> | miR-138-5p                          | 1 |
| <i>circSTXBP5L</i> | miR-140-5p                          | 1 |
| <i>circSTXBP5L</i> | miR-1468-3p                         | 1 |
| <i>circSTXBP5L</i> | miR-1468-5p                         | 1 |
| <i>circSTXBP5L</i> | miR-148a-5p                         | 1 |
| <i>circSTXBP5L</i> | miR-151-5p                          | 1 |
| <i>circSTXBP5L</i> | miR-1972                            | 1 |
| <i>circSTXBP5L</i> | miR-203a-5p                         | 1 |
| <i>circSTXBP5L</i> | miR-215-3p                          | 2 |
| <i>circSTXBP5L</i> | miR-25-3p/32-5p/92-3p/363-3p/367-3p | 1 |
| <i>circSTXBP5L</i> | miR-302c-5p                         | 1 |
| <i>circSTXBP5L</i> | miR-3120-5p                         | 1 |
| <i>circSTXBP5L</i> | miR-3150b-3p                        | 1 |
| <i>circSTXBP5L</i> | miR-3182                            | 1 |
| <i>circSTXBP5L</i> | miR-3192-3p                         | 1 |
| <i>circSTXBP5L</i> | miR-323b-5p/410-5p/494-5p           | 1 |
| <i>circSTXBP5L</i> | miR-346                             | 1 |
| <i>circSTXBP5L</i> | miR-3614-5p                         | 1 |
| <i>circSTXBP5L</i> | miR-375                             | 1 |
| <i>circSTXBP5L</i> | miR-382-5p                          | 1 |
| <i>circSTXBP5L</i> | miR-4266                            | 1 |
| <i>circSTXBP5L</i> | miR-4271/4725-3p/6780b-5p           | 1 |
| <i>circSTXBP5L</i> | miR-4278                            | 1 |
| <i>circSTXBP5L</i> | miR-4281                            | 1 |
| <i>circSTXBP5L</i> | miR-4317                            | 1 |
| <i>circSTXBP5L</i> | miR-4438                            | 1 |
| <i>circSTXBP5L</i> | miR-4454                            | 1 |
| <i>circSTXBP5L</i> | miR-4471/8059                       | 1 |
| <i>circSTXBP5L</i> | miR-4490                            | 1 |
| <i>circSTXBP5L</i> | miR-4515                            | 1 |
| <i>circSTXBP5L</i> | miR-4524b-3p                        | 1 |
| <i>circSTXBP5L</i> | miR-4649-3p                         | 1 |
| <i>circSTXBP5L</i> | miR-4650-5p                         | 1 |
| <i>circSTXBP5L</i> | miR-4691-3p                         | 1 |
| <i>circSTXBP5L</i> | miR-4717-5p                         | 1 |
| <i>circSTXBP5L</i> | miR-4740-5p                         | 1 |
| <i>circSTXBP5L</i> | miR-4774-5p                         | 1 |
| <i>circSTXBP5L</i> | miR-4786-5p                         | 1 |

|                    |                                      |   |
|--------------------|--------------------------------------|---|
| <i>circSTXBP5L</i> | miR-4788                             | 1 |
| <i>circSTXBP5L</i> | miR-4800-3p                          | 1 |
| <i>circSTXBP5L</i> | miR-495-5p                           | 1 |
| <i>circSTXBP5L</i> | miR-5009-5p/8058                     | 1 |
| <i>circSTXBP5L</i> | miR-505-5p                           | 1 |
| <i>circSTXBP5L</i> | miR-5092                             | 1 |
| <i>circSTXBP5L</i> | miR-511-5p                           | 1 |
| <i>circSTXBP5L</i> | miR-5189-3p                          | 1 |
| <i>circSTXBP5L</i> | miR-548aj-5p/548f-5p/548g-5p/548x-5p | 1 |
| <i>circSTXBP5L</i> | miR-551b-5p                          | 1 |
| <i>circSTXBP5L</i> | miR-5705                             | 1 |
| <i>circSTXBP5L</i> | miR-611/3131                         | 1 |
| <i>circSTXBP5L</i> | miR-6131                             | 1 |
| <i>circSTXBP5L</i> | miR-616-3p                           | 1 |
| <i>circSTXBP5L</i> | miR-632/4288                         | 1 |
| <i>circSTXBP5L</i> | miR-6500-3p                          | 1 |
| <i>circSTXBP5L</i> | miR-652-5p                           | 1 |
| <i>circSTXBP5L</i> | miR-668-3p                           | 1 |
| <i>circSTXBP5L</i> | miR-6755-3p                          | 2 |
| <i>circSTXBP5L</i> | miR-6773-3p                          | 2 |
| <i>circSTXBP5L</i> | miR-6783-5p                          | 1 |
| <i>circSTXBP5L</i> | miR-6789-5p                          | 1 |
| <i>circSTXBP5L</i> | miR-6824-5p                          | 1 |
| <i>circSTXBP5L</i> | miR-6888-5p                          | 2 |
| <i>circSTXBP5L</i> | miR-7156-3p                          | 1 |
| <i>circSTXBP5L</i> | miR-7158-5p                          | 1 |
| <i>circSTXBP5L</i> | miR-7162-3p                          | 1 |
| <i>circSTXBP5L</i> | miR-769-5p                           | 1 |
| <i>circSTXBP5L</i> | miR-7702                             | 1 |
| <i>circSTXBP5L</i> | miR-873-3p                           | 1 |
| <i>circSTXBP5L</i> | miR-103a-2-5p                        | 2 |
| <i>circSTXBP5L</i> | miR-1206                             | 1 |
| <i>circSTXBP5L</i> | miR-1267                             | 1 |
| <i>circSTXBP5L</i> | miR-1270                             | 1 |
| <i>circSTXBP5L</i> | miR-1273f                            | 2 |
| <i>circSTXBP5L</i> | miR-1289                             | 1 |
| <i>circSTXBP5L</i> | miR-136-5p                           | 1 |
| <i>circSTXBP5L</i> | miR-139-3p                           | 2 |



|                    |                      |   |
|--------------------|----------------------|---|
| <i>circSTXBP5L</i> | miR-143-3p           | 2 |
| <i>circSTXBP5L</i> | miR-143-5p           | 1 |
| <i>circSTXBP5L</i> | miR-1537-5p          | 1 |
| <i>circSTXBP5L</i> | miR-182-5p           | 1 |
| <i>circSTXBP5L</i> | miR-185-5p           | 1 |
| <i>circSTXBP5L</i> | miR-19-3p            | 1 |
| <i>circSTXBP5L</i> | miR-1973             | 1 |
| <i>circSTXBP5L</i> | miR-21-3p/3591-3p    | 1 |
| <i>circSTXBP5L</i> | miR-217              | 1 |
| <i>circSTXBP5L</i> | miR-27b-5p           | 1 |
| <i>circSTXBP5L</i> | miR-2861             | 1 |
| <i>circSTXBP5L</i> | miR-302c-3p.2/520-3p | 1 |
| <i>circSTXBP5L</i> | miR-3121-5p          | 1 |
| <i>circSTXBP5L</i> | miR-3136-5p/4439     | 2 |
| <i>circSTXBP5L</i> | miR-3173-3p/6891-5p  | 3 |
| <i>circSTXBP5L</i> | miR-3180-5p          | 2 |
| <i>circSTXBP5L</i> | miR-3194-3p          | 1 |
| <i>circSTXBP5L</i> | miR-345-5p           | 1 |
| <i>circSTXBP5L</i> | miR-3613-5p          | 1 |
| <i>circSTXBP5L</i> | miR-367-5p           | 1 |
| <i>circSTXBP5L</i> | miR-3692-5p          | 1 |
| <i>circSTXBP5L</i> | miR-378g             | 1 |
| <i>circSTXBP5L</i> | miR-3929/4419b/4478  | 1 |
| <i>circSTXBP5L</i> | miR-3938             | 1 |
| <i>circSTXBP5L</i> | miR-3944-5p          | 1 |
| <i>circSTXBP5L</i> | miR-3977             | 1 |
| <i>circSTXBP5L</i> | miR-4251             | 1 |
| <i>circSTXBP5L</i> | miR-4259             | 1 |
| <i>circSTXBP5L</i> | miR-4294             | 1 |
| <i>circSTXBP5L</i> | miR-4303             | 1 |
| <i>circSTXBP5L</i> | miR-4329             | 1 |
| <i>circSTXBP5L</i> | miR-4428             | 3 |
| <i>circSTXBP5L</i> | miR-4433b-3p         | 1 |
| <i>circSTXBP5L</i> | miR-4463             | 1 |
| <i>circSTXBP5L</i> | miR-4477b            | 1 |
| <i>circSTXBP5L</i> | miR-4486             | 1 |
| <i>circSTXBP5L</i> | miR-4499             | 1 |
| <i>circSTXBP5L</i> | miR-4520-2-3p        | 1 |

|                    |                                      |   |
|--------------------|--------------------------------------|---|
| <i>circSTXBP5L</i> | miR-4529-3p                          | 1 |
| <i>circSTXBP5L</i> | miR-4531                             | 1 |
| <i>circSTXBP5L</i> | miR-4536-3p                          | 1 |
| <i>circSTXBP5L</i> | miR-455-3p.2                         | 1 |
| <i>circSTXBP5L</i> | miR-4639-5p                          | 1 |
| <i>circSTXBP5L</i> | miR-4670-3p                          | 1 |
| <i>circSTXBP5L</i> | miR-4683                             | 2 |
| <i>circSTXBP5L</i> | miR-4708-5p                          | 2 |
| <i>circSTXBP5L</i> | miR-4715-5p                          | 1 |
| <i>circSTXBP5L</i> | miR-4718                             | 1 |
| <i>circSTXBP5L</i> | miR-4732-5p                          | 1 |
| <i>circSTXBP5L</i> | miR-4738-5p                          | 1 |
| <i>circSTXBP5L</i> | miR-4778-3p                          | 1 |
| <i>circSTXBP5L</i> | miR-484/3155                         | 1 |
| <i>circSTXBP5L</i> | miR-4999-5p                          | 1 |
| <i>circSTXBP5L</i> | miR-5000-3p                          | 1 |
| <i>circSTXBP5L</i> | miR-5007-5p                          | 1 |
| <i>circSTXBP5L</i> | miR-509-3-5p/509-5p/4418             | 1 |
| <i>circSTXBP5L</i> | miR-512-3p                           | 1 |
| <i>circSTXBP5L</i> | miR-5192                             | 1 |
| <i>circSTXBP5L</i> | miR-520g-5p                          | 1 |
| <i>circSTXBP5L</i> | miR-5702                             | 1 |
| <i>circSTXBP5L</i> | miR-573/3616-5p                      | 1 |
| <i>circSTXBP5L</i> | miR-612/1285-3p/3187-5p/5189-5p/6860 | 1 |
| <i>circSTXBP5L</i> | miR-624-3p                           | 1 |
| <i>circSTXBP5L</i> | miR-628-5p                           | 1 |
| <i>circSTXBP5L</i> | miR-653-5p                           | 1 |
| <i>circSTXBP5L</i> | miR-6724-5p/6773-5p                  | 1 |
| <i>circSTXBP5L</i> | miR-6761-5p                          | 1 |
| <i>circSTXBP5L</i> | miR-6782-3p                          | 1 |
| <i>circSTXBP5L</i> | miR-6822-3p                          | 1 |
| <i>circSTXBP5L</i> | miR-6830-5p                          | 1 |
| <i>circSTXBP5L</i> | miR-6832-5p                          | 1 |
| <i>circSTXBP5L</i> | miR-6846-3p                          | 1 |
| <i>circSTXBP5L</i> | miR-6853-3p                          | 1 |
| <i>circSTXBP5L</i> | miR-6859-3p                          | 1 |
| <i>circSTXBP5L</i> | miR-6863                             | 1 |
| <i>circSTXBP5L</i> | miR-711                              | 1 |

|                    |                     |   |
|--------------------|---------------------|---|
| <i>circSTXBP5L</i> | miR-760             | 1 |
| <i>circSTXBP5L</i> | miR-8088            | 1 |
| <i>circSTXBP5L</i> | miR-891b            | 1 |
| <i>circSTXBP5L</i> | miR-93-3p           | 1 |
| <i>circSTXBP5L</i> | miR-943             | 2 |
| <i>circSTXBP5L</i> | miR-96-5p/1271-5p   | 1 |
| <i>circSTXBP5L</i> | miR-155-5p          | 1 |
| <i>circSTXBP5L</i> | miR-19-5p           | 1 |
| <i>circSTXBP5L</i> | miR-1910-5p         | 1 |
| <i>circSTXBP5L</i> | miR-194-3p          | 1 |
| <i>circSTXBP5L</i> | miR-199-3p          | 1 |
| <i>circSTXBP5L</i> | miR-204-5p/211-5p   | 1 |
| <i>circSTXBP5L</i> | miR-2052            | 1 |
| <i>circSTXBP5L</i> | miR-2053            | 1 |
| <i>circSTXBP5L</i> | miR-2115-5p         | 1 |
| <i>circSTXBP5L</i> | miR-214-5p          | 1 |
| <i>circSTXBP5L</i> | miR-222-5p          | 1 |
| <i>circSTXBP5L</i> | miR-223-3p          | 1 |
| <i>circSTXBP5L</i> | miR-2355-3p         | 1 |
| <i>circSTXBP5L</i> | miR-2682-3p/6781-3p | 1 |
| <i>circSTXBP5L</i> | miR-297             | 1 |
| <i>circSTXBP5L</i> | miR-3064-5p         | 1 |
| <i>circSTXBP5L</i> | miR-3191-5p         | 1 |
| <i>circSTXBP5L</i> | miR-365-3p          | 1 |
| <i>circSTXBP5L</i> | miR-3670            | 1 |
| <i>circSTXBP5L</i> | miR-3677-5p         | 1 |
| <i>circSTXBP5L</i> | miR-3688-5p         | 1 |
| <i>circSTXBP5L</i> | miR-374-5p          | 1 |
| <i>circSTXBP5L</i> | miR-377-3p          | 1 |
| <i>circSTXBP5L</i> | miR-3935            | 1 |
| <i>circSTXBP5L</i> | miR-4276            | 1 |
| <i>circSTXBP5L</i> | miR-4421/5699-3p    | 1 |
| <i>circSTXBP5L</i> | miR-4470            | 1 |
| <i>circSTXBP5L</i> | miR-455-3p.1        | 1 |
| <i>circSTXBP5L</i> | miR-4643            | 1 |
| <i>circSTXBP5L</i> | miR-4646-3p         | 1 |
| <i>circSTXBP5L</i> | miR-4687-3p         | 1 |
| <i>circSTXBP5L</i> | miR-4697-3p         | 1 |

|                    |                             |   |
|--------------------|-----------------------------|---|
| <i>circSTXBP5L</i> | miR-4711-3p                 | 1 |
| <i>circSTXBP5L</i> | miR-4780                    | 1 |
| <i>circSTXBP5L</i> | miR-4789-3p                 | 1 |
| <i>circSTXBP5L</i> | miR-4796-3p                 | 1 |
| <i>circSTXBP5L</i> | miR-495-3p                  | 2 |
| <i>circSTXBP5L</i> | miR-516a-3p/516b-3p/7162-5p | 1 |
| <i>circSTXBP5L</i> | miR-517-3p                  | 1 |
| <i>circSTXBP5L</i> | miR-532-5p                  | 1 |
| <i>circSTXBP5L</i> | miR-539-5p                  | 1 |
| <i>circSTXBP5L</i> | miR-5571-3p                 | 1 |
| <i>circSTXBP5L</i> | miR-5693                    | 1 |
| <i>circSTXBP5L</i> | miR-572                     | 1 |
| <i>circSTXBP5L</i> | miR-593-3p                  | 1 |
| <i>circSTXBP5L</i> | miR-623                     | 1 |
| <i>circSTXBP5L</i> | miR-6514-3p                 | 1 |
| <i>circSTXBP5L</i> | miR-6516-3p                 | 1 |
| <i>circSTXBP5L</i> | miR-654-3p                  | 1 |
| <i>circSTXBP5L</i> | miR-6748-3p                 | 1 |
| <i>circSTXBP5L</i> | miR-675-3p                  | 1 |
| <i>circSTXBP5L</i> | miR-6780b-3p                | 1 |
| <i>circSTXBP5L</i> | miR-6811-3p                 | 1 |
| <i>circSTXBP5L</i> | miR-6818-3p                 | 1 |
| <i>circSTXBP5L</i> | miR-6825-3p                 | 1 |
| <i>circSTXBP5L</i> | miR-6888-3p                 | 2 |
| <i>circSTXBP5L</i> | miR-6894-3p                 | 1 |
| <i>circSTXBP5L</i> | miR-6895-3p                 | 1 |
| <i>circSTXBP5L</i> | miR-7109-3p                 | 1 |
| <i>circSTXBP5L</i> | miR-7974                    | 1 |
| <i>circSTXBP5L</i> | miR-7975                    | 1 |
| <i>circSTXBP5L</i> | miR-891a-3p                 | 1 |
| <i>circSTXBP5L</i> | miR-936                     | 1 |
| <i>circSV2B</i>    | miR-100-3p                  | 1 |
| <i>circSV2B</i>    | miR-101-3p.1                | 1 |
| <i>circSV2B</i>    | miR-103a-2-5p               | 1 |
| <i>circSV2B</i>    | miR-1178-3p                 | 1 |
| <i>circSV2B</i>    | miR-122-3p                  | 2 |
| <i>circSV2B</i>    | miR-1224-5p                 | 2 |
| <i>circSV2B</i>    | miR-1233-3p                 | 1 |

|                 |                     |   |
|-----------------|---------------------|---|
| <i>circSV2B</i> | miR-1233-5p/6778-5p | 1 |
| <i>circSV2B</i> | miR-1238-3p         | 1 |
| <i>circSV2B</i> | miR-124-5p          | 2 |
| <i>circSV2B</i> | miR-1245b-3p        | 1 |
| <i>circSV2B</i> | miR-1245b-5p        | 2 |
| <i>circSV2B</i> | miR-1250-3p         | 2 |
| <i>circSV2B</i> | miR-1250-5p         | 2 |
| <i>circSV2B</i> | miR-1251-5p         | 2 |
| <i>circSV2B</i> | miR-1252-5p         | 3 |
| <i>circSV2B</i> | miR-1255a/1255b-5p  | 3 |
| <i>circSV2B</i> | miR-1256            | 3 |
| <i>circSV2B</i> | miR-1263            | 3 |
| <i>circSV2B</i> | miR-1265            | 4 |
| <i>circSV2B</i> | miR-1266-3p         | 2 |
| <i>circSV2B</i> | miR-1267            | 4 |
| <i>circSV2B</i> | miR-1269            | 1 |
| <i>circSV2B</i> | miR-127-3p          | 1 |
| <i>circSV2B</i> | miR-127-5p          | 1 |
| <i>circSV2B</i> | miR-1272            | 2 |
| <i>circSV2B</i> | miR-1273e           | 5 |
| <i>circSV2B</i> | miR-1273f           | 1 |
| <i>circSV2B</i> | miR-128-3p          | 1 |
| <i>circSV2B</i> | miR-1285-5p         | 2 |
| <i>circSV2B</i> | miR-1287-3p         | 2 |
| <i>circSV2B</i> | miR-1287-5p         | 1 |
| <i>circSV2B</i> | miR-1295b-3p        | 2 |
| <i>circSV2B</i> | miR-1296-5p         | 1 |
| <i>circSV2B</i> | miR-1298-5p         | 4 |
| <i>circSV2B</i> | miR-1303            | 1 |
| <i>circSV2B</i> | miR-1322            | 2 |
| <i>circSV2B</i> | miR-133a-3p.1       | 1 |
| <i>circSV2B</i> | miR-133a-3p.2/133b  | 1 |
| <i>circSV2B</i> | miR-133a-5p         | 2 |
| <i>circSV2B</i> | miR-134-3p          | 1 |
| <i>circSV2B</i> | miR-135b-3p         | 1 |
| <i>circSV2B</i> | miR-136-5p          | 2 |
| <i>circSV2B</i> | miR-138-5p          | 2 |
| <i>circSV2B</i> | miR-141-3p/200-3p   | 2 |

|                 |                                    |   |
|-----------------|------------------------------------|---|
| <i>circSV2B</i> | miR-142-3p.2                       | 1 |
| <i>circSV2B</i> | miR-143-3p                         | 1 |
| <i>circSV2B</i> | miR-144-3p                         | 1 |
| <i>circSV2B</i> | miR-145-3p                         | 2 |
| <i>circSV2B</i> | miR-1468-3p                        | 1 |
| <i>circSV2B</i> | miR-1470                           | 2 |
| <i>circSV2B</i> | miR-148a-5p                        | 1 |
| <i>circSV2B</i> | miR-149-3p/4728-5p/6785-5p/6883-5p | 1 |
| <i>circSV2B</i> | miR-150-3p                         | 3 |
| <i>circSV2B</i> | miR-150-5p                         | 3 |
| <i>circSV2B</i> | miR-151-3p                         | 2 |
| <i>circSV2B</i> | miR-153-5p                         | 1 |
| <i>circSV2B</i> | miR-1537-3p                        | 2 |
| <i>circSV2B</i> | miR-154-3p/487-3p                  | 2 |
| <i>circSV2B</i> | miR-1587/3620-5p                   | 3 |
| <i>circSV2B</i> | miR-15a-3p                         | 1 |
| <i>circSV2B</i> | miR-15b-3p                         | 2 |
| <i>circSV2B</i> | miR-181-5p                         | 2 |
| <i>circSV2B</i> | miR-181a-3p                        | 1 |
| <i>circSV2B</i> | miR-1827                           | 2 |
| <i>circSV2B</i> | miR-183-3p                         | 2 |
| <i>circSV2B</i> | miR-183-5p.1                       | 2 |
| <i>circSV2B</i> | miR-185-3p                         | 1 |
| <i>circSV2B</i> | miR-186-5p                         | 3 |
| <i>circSV2B</i> | miR-188-5p                         | 2 |
| <i>circSV2B</i> | miR-19-5p                          | 2 |
| <i>circSV2B</i> | miR-1909-3p/6722-3p                | 3 |
| <i>circSV2B</i> | miR-1910-3p/6511a-5p               | 2 |
| <i>circSV2B</i> | miR-1910-5p                        | 1 |
| <i>circSV2B</i> | miR-1911-3p                        | 4 |
| <i>circSV2B</i> | miR-1915-3p/6764-5p                | 4 |
| <i>circSV2B</i> | miR-197-3p                         | 1 |
| <i>circSV2B</i> | miR-1972                           | 4 |
| <i>circSV2B</i> | miR-200ab-5p                       | 1 |
| <i>circSV2B</i> | miR-203b-3p                        | 6 |
| <i>circSV2B</i> | miR-203b-5p/6718-5p                | 1 |
| <i>circSV2B</i> | miR-205-5p                         | 1 |
| <i>circSV2B</i> | miR-2052                           | 2 |

|                 |                                              |   |
|-----------------|----------------------------------------------|---|
| <i>circSV2B</i> | miR-20a-3p                                   | 1 |
| <i>circSV2B</i> | miR-20b-3p                                   | 1 |
| <i>circSV2B</i> | miR-21-3p/3591-3p                            | 1 |
| <i>circSV2B</i> | miR-21-5p/590-5p                             | 2 |
| <i>circSV2B</i> | miR-2110                                     | 2 |
| <i>circSV2B</i> | miR-2115-5p                                  | 3 |
| <i>circSV2B</i> | miR-2116-3p                                  | 3 |
| <i>circSV2B</i> | miR-2117                                     | 2 |
| <i>circSV2B</i> | miR-212-5p                                   | 3 |
| <i>circSV2B</i> | miR-215-3p                                   | 1 |
| <i>circSV2B</i> | miR-219-5p                                   | 1 |
| <i>circSV2B</i> | miR-22-3p                                    | 1 |
| <i>circSV2B</i> | miR-223-3p                                   | 1 |
| <i>circSV2B</i> | miR-223-5p                                   | 2 |
| <i>circSV2B</i> | miR-2278                                     | 3 |
| <i>circSV2B</i> | miR-23-5p                                    | 2 |
| <i>circSV2B</i> | miR-2355-5p                                  | 1 |
| <i>circSV2B</i> | miR-2467-3p                                  | 2 |
| <i>circSV2B</i> | miR-2681-3p                                  | 1 |
| <i>circSV2B</i> | miR-28-5p/708-5p                             | 1 |
| <i>circSV2B</i> | miR-29-3p                                    | 1 |
| <i>circSV2B</i> | miR-296-3p                                   | 1 |
| <i>circSV2B</i> | miR-296-5p                                   | 1 |
| <i>circSV2B</i> | miR-298                                      | 4 |
| <i>circSV2B</i> | miR-29a-5p                                   | 1 |
| <i>circSV2B</i> | miR-30-3p                                    | 2 |
| <i>circSV2B</i> | miR-3074-3p                                  | 1 |
| <i>circSV2B</i> | miR-3074-5p                                  | 2 |
| <i>circSV2B</i> | miR-30b-3p/1273h-5p/3689-3p/6779-5p/6780a-5p | 2 |
| <i>circSV2B</i> | miR-30c-3p/6788-5p                           | 2 |
| <i>circSV2B</i> | miR-31-3p                                    | 1 |
| <i>circSV2B</i> | miR-3120-3p                                  | 1 |
| <i>circSV2B</i> | miR-3121-3p                                  | 3 |
| <i>circSV2B</i> | miR-3122/3913-5p                             | 3 |
| <i>circSV2B</i> | miR-3125/3916/6859-5p                        | 1 |
| <i>circSV2B</i> | miR-3126-5p                                  | 1 |
| <i>circSV2B</i> | miR-3127-3p/6756-3p                          | 1 |
| <i>circSV2B</i> | miR-3127-5p                                  | 2 |

|                 |                           |   |
|-----------------|---------------------------|---|
| <i>circSV2B</i> | miR-3128                  | 2 |
| <i>circSV2B</i> | miR-3129-3p/5583-5p       | 1 |
| <i>circSV2B</i> | miR-3130-3p               | 1 |
| <i>circSV2B</i> | miR-3133                  | 3 |
| <i>circSV2B</i> | miR-3135b                 | 1 |
| <i>circSV2B</i> | miR-3136-3p/7155-3p       | 1 |
| <i>circSV2B</i> | miR-3137                  | 1 |
| <i>circSV2B</i> | miR-3149                  | 1 |
| <i>circSV2B</i> | miR-3150a-3p              | 2 |
| <i>circSV2B</i> | miR-3150a-5p/3150b-5p     | 1 |
| <i>circSV2B</i> | miR-3151-5p               | 1 |
| <i>circSV2B</i> | miR-3157-5p               | 2 |
| <i>circSV2B</i> | miR-3160-3p               | 1 |
| <i>circSV2B</i> | miR-3165                  | 2 |
| <i>circSV2B</i> | miR-3166                  | 2 |
| <i>circSV2B</i> | miR-3169                  | 2 |
| <i>circSV2B</i> | miR-3170/6855-5p          | 1 |
| <i>circSV2B</i> | miR-3173-3p/6891-5p       | 1 |
| <i>circSV2B</i> | miR-3176/3922-3p          | 1 |
| <i>circSV2B</i> | miR-3183/4723-3p/6769b-3p | 1 |
| <i>circSV2B</i> | miR-3185                  | 1 |
| <i>circSV2B</i> | miR-3189-3p               | 3 |
| <i>circSV2B</i> | miR-3189-5p               | 2 |
| <i>circSV2B</i> | miR-3190-5p               | 1 |
| <i>circSV2B</i> | miR-3191-5p               | 3 |
| <i>circSV2B</i> | miR-3192-3p               | 1 |
| <i>circSV2B</i> | miR-3194-5p               | 2 |
| <i>circSV2B</i> | miR-3195                  | 1 |
| <i>circSV2B</i> | miR-3197                  | 1 |
| <i>circSV2B</i> | miR-3200-3p               | 2 |
| <i>circSV2B</i> | miR-3200-5p               | 3 |
| <i>circSV2B</i> | miR-3202                  | 3 |
| <i>circSV2B</i> | miR-323b-3p               | 1 |
| <i>circSV2B</i> | miR-324-5p                | 1 |
| <i>circSV2B</i> | miR-326                   | 3 |
| <i>circSV2B</i> | miR-328-3p                | 1 |
| <i>circSV2B</i> | miR-33-5p                 | 2 |
| <i>circSV2B</i> | miR-335-3p                | 2 |



|                 |                    |   |
|-----------------|--------------------|---|
| <i>circSV2B</i> | miR-34a-3p         | 2 |
| <i>circSV2B</i> | miR-34b-5p/449c-5p | 2 |
| <i>circSV2B</i> | miR-361-3p         | 3 |
| <i>circSV2B</i> | miR-361-5p         | 3 |
| <i>circSV2B</i> | miR-3610           | 1 |
| <i>circSV2B</i> | miR-3612           | 2 |
| <i>circSV2B</i> | miR-3613-3p        | 2 |
| <i>circSV2B</i> | miR-3617-3p        | 2 |
| <i>circSV2B</i> | miR-3620-3p        | 1 |
| <i>circSV2B</i> | miR-3622b-5p       | 2 |
| <i>circSV2B</i> | miR-365-3p         | 2 |
| <i>circSV2B</i> | miR-3652/4430      | 1 |
| <i>circSV2B</i> | miR-3662           | 2 |
| <i>circSV2B</i> | miR-3663-3p        | 3 |
| <i>circSV2B</i> | miR-3667-3p        | 3 |
| <i>circSV2B</i> | miR-367-5p         | 4 |
| <i>circSV2B</i> | miR-3675-3p        | 1 |
| <i>circSV2B</i> | miR-3678-5p        | 1 |
| <i>circSV2B</i> | miR-3682-3p        | 1 |
| <i>circSV2B</i> | miR-3686           | 1 |
| <i>circSV2B</i> | miR-3688-3p        | 1 |
| <i>circSV2B</i> | miR-3691-3p        | 2 |
| <i>circSV2B</i> | miR-3691-5p        | 2 |
| <i>circSV2B</i> | miR-370-3p         | 2 |
| <i>circSV2B</i> | miR-374a-3p        | 3 |
| <i>circSV2B</i> | miR-374c-3p        | 1 |
| <i>circSV2B</i> | miR-377-3p         | 1 |
| <i>circSV2B</i> | miR-379-5p         | 1 |
| <i>circSV2B</i> | miR-382-3p         | 3 |
| <i>circSV2B</i> | miR-382-5p         | 2 |
| <i>circSV2B</i> | miR-3911           | 2 |
| <i>circSV2B</i> | miR-3915           | 2 |
| <i>circSV2B</i> | miR-3918           | 7 |
| <i>circSV2B</i> | miR-3919           | 3 |
| <i>circSV2B</i> | miR-3920           | 1 |
| <i>circSV2B</i> | miR-3925-3p        | 5 |
| <i>circSV2B</i> | miR-3928-3p        | 1 |
| <i>circSV2B</i> | miR-3938           | 2 |

|                 |                                    |   |
|-----------------|------------------------------------|---|
| <i>circSV2B</i> | miR-3941                           | 1 |
| <i>circSV2B</i> | miR-3942-3p                        | 1 |
| <i>circSV2B</i> | miR-3943                           | 1 |
| <i>circSV2B</i> | miR-3944-5p                        | 2 |
| <i>circSV2B</i> | miR-3945                           | 1 |
| <i>circSV2B</i> | miR-3973                           | 1 |
| <i>circSV2B</i> | miR-3976                           | 1 |
| <i>circSV2B</i> | miR-3977                           | 1 |
| <i>circSV2B</i> | miR-3978                           | 2 |
| <i>circSV2B</i> | miR-409-3p                         | 4 |
| <i>circSV2B</i> | miR-411-5p.1                       | 1 |
| <i>circSV2B</i> | miR-4251                           | 1 |
| <i>circSV2B</i> | miR-4253/6862-5p                   | 1 |
| <i>circSV2B</i> | miR-4256                           | 2 |
| <i>circSV2B</i> | miR-4258                           | 2 |
| <i>circSV2B</i> | miR-4261                           | 3 |
| <i>circSV2B</i> | miR-4265/4296/4322                 | 1 |
| <i>circSV2B</i> | miR-4267                           | 3 |
| <i>circSV2B</i> | miR-4272                           | 2 |
| <i>circSV2B</i> | miR-4273/7156-5p                   | 2 |
| <i>circSV2B</i> | miR-4276                           | 2 |
| <i>circSV2B</i> | miR-4279                           | 1 |
| <i>circSV2B</i> | miR-4280                           | 1 |
| <i>circSV2B</i> | miR-4281                           | 2 |
| <i>circSV2B</i> | miR-4302                           | 2 |
| <i>circSV2B</i> | miR-4307                           | 2 |
| <i>circSV2B</i> | miR-431-5p                         | 2 |
| <i>circSV2B</i> | miR-4312                           | 1 |
| <i>circSV2B</i> | miR-4313                           | 2 |
| <i>circSV2B</i> | miR-4314                           | 1 |
| <i>circSV2B</i> | miR-4321                           | 1 |
| <i>circSV2B</i> | miR-4323                           | 1 |
| <i>circSV2B</i> | miR-4324                           | 1 |
| <i>circSV2B</i> | miR-4326                           | 2 |
| <i>circSV2B</i> | miR-4329                           | 1 |
| <i>circSV2B</i> | miR-433-5p                         | 2 |
| <i>circSV2B</i> | miR-4417                           | 1 |
| <i>circSV2B</i> | miR-4419a/4510/6127/6129/6130/6133 | 1 |

|                 |                                              |   |
|-----------------|----------------------------------------------|---|
| <i>circSV2B</i> | miR-4423-3p                                  | 2 |
| <i>circSV2B</i> | miR-4426/4647/4662b                          | 3 |
| <i>circSV2B</i> | miR-4427                                     | 1 |
| <i>circSV2B</i> | miR-4428                                     | 1 |
| <i>circSV2B</i> | miR-4433a-3p                                 | 1 |
| <i>circSV2B</i> | miR-4436b-3p/4632-5p/6735-5p/6879-5p/7843-5p | 1 |
| <i>circSV2B</i> | miR-4436b-5p                                 | 1 |
| <i>circSV2B</i> | miR-4437                                     | 2 |
| <i>circSV2B</i> | miR-4438                                     | 2 |
| <i>circSV2B</i> | miR-4445-5p                                  | 1 |
| <i>circSV2B</i> | miR-4446-5p                                  | 4 |
| <i>circSV2B</i> | miR-4447/4472                                | 1 |
| <i>circSV2B</i> | miR-4450                                     | 1 |
| <i>circSV2B</i> | miR-4451                                     | 1 |
| <i>circSV2B</i> | miR-4452                                     | 2 |
| <i>circSV2B</i> | miR-4457                                     | 1 |
| <i>circSV2B</i> | miR-4459                                     | 1 |
| <i>circSV2B</i> | miR-4462                                     | 2 |
| <i>circSV2B</i> | miR-4470                                     | 2 |
| <i>circSV2B</i> | miR-4474-3p                                  | 2 |
| <i>circSV2B</i> | miR-4476/6876-5p                             | 6 |
| <i>circSV2B</i> | miR-4487                                     | 1 |
| <i>circSV2B</i> | miR-4490                                     | 2 |
| <i>circSV2B</i> | miR-4493                                     | 3 |
| <i>circSV2B</i> | miR-4496                                     | 1 |
| <i>circSV2B</i> | miR-4505/5787                                | 1 |
| <i>circSV2B</i> | miR-450a-1-3p                                | 3 |
| <i>circSV2B</i> | miR-450b-3p/769-3p                           | 1 |
| <i>circSV2B</i> | miR-451                                      | 1 |
| <i>circSV2B</i> | miR-4511                                     | 1 |
| <i>circSV2B</i> | miR-4512                                     | 3 |
| <i>circSV2B</i> | miR-452-3p                                   | 2 |
| <i>circSV2B</i> | miR-4520-3p                                  | 2 |
| <i>circSV2B</i> | miR-4521                                     | 1 |
| <i>circSV2B</i> | miR-4524-5p                                  | 2 |
| <i>circSV2B</i> | miR-4524a-3p                                 | 3 |
| <i>circSV2B</i> | miR-4528                                     | 2 |
| <i>circSV2B</i> | miR-4529-5p                                  | 1 |

|                 |                          |   |
|-----------------|--------------------------|---|
| <i>circSV2B</i> | miR-4533                 | 3 |
| <i>circSV2B</i> | miR-4536-5p              | 1 |
| <i>circSV2B</i> | miR-455-3p.1             | 1 |
| <i>circSV2B</i> | miR-4633-3p/6500-5p      | 1 |
| <i>circSV2B</i> | miR-4635                 | 5 |
| <i>circSV2B</i> | miR-4639-3p              | 1 |
| <i>circSV2B</i> | miR-4640-3p              | 3 |
| <i>circSV2B</i> | miR-4640-5p              | 2 |
| <i>circSV2B</i> | miR-4641                 | 1 |
| <i>circSV2B</i> | miR-4642                 | 2 |
| <i>circSV2B</i> | miR-4643                 | 1 |
| <i>circSV2B</i> | miR-4645-5p/4673         | 4 |
| <i>circSV2B</i> | miR-4648                 | 1 |
| <i>circSV2B</i> | miR-4649-3p              | 3 |
| <i>circSV2B</i> | miR-4650-3p              | 1 |
| <i>circSV2B</i> | miR-4650-5p              | 4 |
| <i>circSV2B</i> | miR-4652-3p              | 1 |
| <i>circSV2B</i> | miR-4653-3p              | 3 |
| <i>circSV2B</i> | miR-4654/4769-5p         | 1 |
| <i>circSV2B</i> | miR-4656                 | 1 |
| <i>circSV2B</i> | miR-4659a-3p/4659b-3p    | 1 |
| <i>circSV2B</i> | miR-4659a-5p/4659b-5p    | 1 |
| <i>circSV2B</i> | miR-4663                 | 2 |
| <i>circSV2B</i> | miR-4667-3p              | 2 |
| <i>circSV2B</i> | miR-4667-5p/4700-5p/8089 | 1 |
| <i>circSV2B</i> | miR-4668-3p              | 1 |
| <i>circSV2B</i> | miR-4670-3p              | 1 |
| <i>circSV2B</i> | miR-4672                 | 1 |
| <i>circSV2B</i> | miR-4674                 | 3 |
| <i>circSV2B</i> | miR-4675/4741            | 1 |
| <i>circSV2B</i> | miR-4677-5p              | 2 |
| <i>circSV2B</i> | miR-4680-3p              | 1 |
| <i>circSV2B</i> | miR-4684-5p              | 1 |
| <i>circSV2B</i> | miR-4685-5p/6837-5p      | 2 |
| <i>circSV2B</i> | miR-4689/6858-5p         | 2 |
| <i>circSV2B</i> | miR-4691-3p              | 6 |
| <i>circSV2B</i> | miR-4693-3p              | 1 |
| <i>circSV2B</i> | miR-4694-3p              | 2 |

|                 |                             |   |
|-----------------|-----------------------------|---|
| <i>circSV2B</i> | miR-4694-5p                 | 3 |
| <i>circSV2B</i> | miR-4695-3p                 | 2 |
| <i>circSV2B</i> | miR-4695-5p                 | 1 |
| <i>circSV2B</i> | miR-4697-3p                 | 1 |
| <i>circSV2B</i> | miR-4698                    | 2 |
| <i>circSV2B</i> | miR-4699-5p                 | 1 |
| <i>circSV2B</i> | miR-4704-3p                 | 1 |
| <i>circSV2B</i> | miR-4705                    | 3 |
| <i>circSV2B</i> | miR-4707-3p                 | 2 |
| <i>circSV2B</i> | miR-4708-5p                 | 1 |
| <i>circSV2B</i> | miR-4713-5p                 | 1 |
| <i>circSV2B</i> | miR-4716-5p                 | 2 |
| <i>circSV2B</i> | miR-4717-3p                 | 1 |
| <i>circSV2B</i> | miR-4717-5p                 | 2 |
| <i>circSV2B</i> | miR-4720-5p/4799-3p/5588-5p | 2 |
| <i>circSV2B</i> | miR-4722-3p/6727-3p         | 1 |
| <i>circSV2B</i> | miR-4724-5p                 | 1 |
| <i>circSV2B</i> | miR-4726-3p                 | 4 |
| <i>circSV2B</i> | miR-4728-3p                 | 3 |
| <i>circSV2B</i> | miR-4732-5p                 | 2 |
| <i>circSV2B</i> | miR-4733-5p                 | 2 |
| <i>circSV2B</i> | miR-4738-3p                 | 1 |
| <i>circSV2B</i> | miR-4738-5p                 | 2 |
| <i>circSV2B</i> | miR-4739                    | 1 |
| <i>circSV2B</i> | miR-4740-3p                 | 1 |
| <i>circSV2B</i> | miR-4743-3p                 | 1 |
| <i>circSV2B</i> | miR-4747-3p                 | 1 |
| <i>circSV2B</i> | miR-4747-5p/5196-5p         | 1 |
| <i>circSV2B</i> | miR-4750-3p                 | 2 |
| <i>circSV2B</i> | miR-4751                    | 2 |
| <i>circSV2B</i> | miR-4755-3p                 | 2 |
| <i>circSV2B</i> | miR-4756-3p                 | 3 |
| <i>circSV2B</i> | miR-4757-5p/6744-3p         | 2 |
| <i>circSV2B</i> | miR-4758-3p                 | 2 |
| <i>circSV2B</i> | miR-4759                    | 2 |
| <i>circSV2B</i> | miR-4760-3p                 | 3 |
| <i>circSV2B</i> | miR-4761-3p                 | 5 |
| <i>circSV2B</i> | miR-4764-5p                 | 1 |

|                 |                             |   |
|-----------------|-----------------------------|---|
| <i>circSV2B</i> | miR-4768-3p                 | 1 |
| <i>circSV2B</i> | miR-4768-5p/6833-3p         | 2 |
| <i>circSV2B</i> | miR-4771                    | 2 |
| <i>circSV2B</i> | miR-4773                    | 1 |
| <i>circSV2B</i> | miR-4774-5p                 | 2 |
| <i>circSV2B</i> | miR-4778-5p                 | 1 |
| <i>circSV2B</i> | miR-4779                    | 1 |
| <i>circSV2B</i> | miR-4781-3p                 | 4 |
| <i>circSV2B</i> | miR-4785                    | 1 |
| <i>circSV2B</i> | miR-4786-3p                 | 1 |
| <i>circSV2B</i> | miR-4789-3p                 | 1 |
| <i>circSV2B</i> | miR-4790-5p                 | 3 |
| <i>circSV2B</i> | miR-4793-3p                 | 1 |
| <i>circSV2B</i> | miR-4793-5p                 | 1 |
| <i>circSV2B</i> | miR-4795-5p                 | 3 |
| <i>circSV2B</i> | miR-4798-5p                 | 1 |
| <i>circSV2B</i> | miR-484/3155                | 2 |
| <i>circSV2B</i> | miR-490-5p                  | 3 |
| <i>circSV2B</i> | miR-491-5p                  | 1 |
| <i>circSV2B</i> | miR-495-3p                  | 2 |
| <i>circSV2B</i> | miR-495-5p                  | 2 |
| <i>circSV2B</i> | miR-497-3p                  | 2 |
| <i>circSV2B</i> | miR-5004-3p                 | 2 |
| <i>circSV2B</i> | miR-5004-5p                 | 2 |
| <i>circSV2B</i> | miR-5007-3p                 | 1 |
| <i>circSV2B</i> | miR-5009-5p/8058            | 1 |
| <i>circSV2B</i> | miR-506-5p                  | 1 |
| <i>circSV2B</i> | miR-508-3p                  | 1 |
| <i>circSV2B</i> | miR-5089-5p                 | 1 |
| <i>circSV2B</i> | miR-5092                    | 1 |
| <i>circSV2B</i> | miR-5094                    | 1 |
| <i>circSV2B</i> | miR-5095/7151-3p            | 2 |
| <i>circSV2B</i> | miR-510-3p                  | 3 |
| <i>circSV2B</i> | miR-513b-5p                 | 1 |
| <i>circSV2B</i> | miR-513c-5p/514b-5p         | 2 |
| <i>circSV2B</i> | miR-515-5p/519e-5p          | 2 |
| <i>circSV2B</i> | miR-516a-3p/516b-3p/7162-5p | 3 |
| <i>circSV2B</i> | miR-517-5p                  | 2 |

|                 |                                                                  |   |
|-----------------|------------------------------------------------------------------|---|
| <i>circSV2B</i> | miR-5187-3p                                                      | 1 |
| <i>circSV2B</i> | miR-5187-5p                                                      | 2 |
| <i>circSV2B</i> | miR-5189-3p                                                      | 1 |
| <i>circSV2B</i> | miR-518c-5p                                                      | 3 |
| <i>circSV2B</i> | miR-5196-3p                                                      | 1 |
| <i>circSV2B</i> | miR-5197-3p                                                      | 2 |
| <i>circSV2B</i> | miR-520g-3p                                                      | 1 |
| <i>circSV2B</i> | miR-520g-5p                                                      | 1 |
| <i>circSV2B</i> | miR-522-3p                                                       | 2 |
| <i>circSV2B</i> | miR-524-3p/525-3p                                                | 2 |
| <i>circSV2B</i> | miR-525-5p                                                       | 1 |
| <i>circSV2B</i> | miR-526b-5p                                                      | 4 |
| <i>circSV2B</i> | miR-532-3p                                                       | 3 |
| <i>circSV2B</i> | miR-532-5p                                                       | 1 |
| <i>circSV2B</i> | miR-539-3p                                                       | 1 |
| <i>circSV2B</i> | miR-544b                                                         | 1 |
| <i>circSV2B</i> | miR-548ac/548bb-3p/548d-3p/548h-3p/548z                          | 2 |
| <i>circSV2B</i> | miR-548ai/548ag/548ba/570-5p                                     | 1 |
| <i>circSV2B</i> | miR-548aj-5p/548f-5p/548g-5p/548x-5p                             | 1 |
| <i>circSV2B</i> | miR-548aq-3p/548am-3p/548aj-3p/548al-3p/548ae-3p/548j-3p/548x-3p | 1 |
| <i>circSV2B</i> | miR-548av-3p                                                     | 1 |
| <i>circSV2B</i> | miR-548av-5p/548k/8054                                           | 2 |
| <i>circSV2B</i> | miR-548ay-5p/548au-5p/548as-5p/548ar-3p/548aq-5p/548ap-5p/548am- | 2 |
| <i>circSV2B</i> | miR-548b-3p                                                      | 1 |
| <i>circSV2B</i> | miR-548c-3p                                                      | 1 |
| <i>circSV2B</i> | miR-548g-3p                                                      | 2 |
| <i>circSV2B</i> | miR-548l                                                         | 2 |
| <i>circSV2B</i> | miR-558                                                          | 1 |
| <i>circSV2B</i> | miR-5580-5p                                                      | 1 |
| <i>circSV2B</i> | miR-5586-5p                                                      | 2 |
| <i>circSV2B</i> | miR-5590-5p                                                      | 1 |
| <i>circSV2B</i> | miR-562                                                          | 2 |
| <i>circSV2B</i> | miR-566                                                          | 3 |
| <i>circSV2B</i> | miR-5690                                                         | 1 |
| <i>circSV2B</i> | miR-5696                                                         | 1 |
| <i>circSV2B</i> | miR-5697                                                         | 1 |
| <i>circSV2B</i> | miR-5699-5p                                                      | 2 |
| <i>circSV2B</i> | miR-573/3616-5p                                                  | 3 |

|                 |                  |   |
|-----------------|------------------|---|
| <i>circSV2B</i> | miR-575/4676-5p  | 4 |
| <i>circSV2B</i> | miR-579-3p       | 1 |
| <i>circSV2B</i> | miR-580-3p       | 2 |
| <i>circSV2B</i> | miR-587          | 1 |
| <i>circSV2B</i> | miR-597-5p       | 1 |
| <i>circSV2B</i> | miR-602          | 2 |
| <i>circSV2B</i> | miR-605-3p       | 3 |
| <i>circSV2B</i> | miR-605-5p       | 1 |
| <i>circSV2B</i> | miR-607          | 2 |
| <i>circSV2B</i> | miR-6072/6891-3p | 1 |
| <i>circSV2B</i> | miR-6076/6797-3p | 2 |
| <i>circSV2B</i> | miR-6077         | 2 |
| <i>circSV2B</i> | miR-6079         | 1 |
| <i>circSV2B</i> | miR-6087         | 1 |
| <i>circSV2B</i> | miR-6126         | 2 |
| <i>circSV2B</i> | miR-6131         | 2 |
| <i>circSV2B</i> | miR-6132/6836-5p | 3 |
| <i>circSV2B</i> | miR-6134         | 1 |
| <i>circSV2B</i> | miR-614          | 1 |
| <i>circSV2B</i> | miR-615-5p       | 1 |
| <i>circSV2B</i> | miR-627-5p       | 1 |
| <i>circSV2B</i> | miR-628-5p       | 3 |
| <i>circSV2B</i> | miR-629-3p       | 2 |
| <i>circSV2B</i> | miR-630          | 2 |
| <i>circSV2B</i> | miR-631/3661     | 2 |
| <i>circSV2B</i> | miR-634          | 2 |
| <i>circSV2B</i> | miR-635/6774-5p  | 5 |
| <i>circSV2B</i> | miR-637          | 1 |
| <i>circSV2B</i> | miR-642b-5p      | 2 |
| <i>circSV2B</i> | miR-643          | 1 |
| <i>circSV2B</i> | miR-644a         | 2 |
| <i>circSV2B</i> | miR-648          | 3 |
| <i>circSV2B</i> | miR-6501-3p      | 2 |
| <i>circSV2B</i> | miR-6507-5p      | 2 |
| <i>circSV2B</i> | miR-6508-3p      | 2 |
| <i>circSV2B</i> | miR-6509-3p      | 1 |
| <i>circSV2B</i> | miR-651-3p       | 2 |
| <i>circSV2B</i> | miR-6511-3p      | 1 |



|                 |                             |   |
|-----------------|-----------------------------|---|
| <i>circSV2B</i> | miR-6511-5p                 | 2 |
| <i>circSV2B</i> | miR-6513-5p                 | 3 |
| <i>circSV2B</i> | miR-6514-3p                 | 1 |
| <i>circSV2B</i> | miR-6516-3p                 | 2 |
| <i>circSV2B</i> | miR-654-5p                  | 1 |
| <i>circSV2B</i> | miR-656-5p                  | 1 |
| <i>circSV2B</i> | miR-664a-3p                 | 3 |
| <i>circSV2B</i> | miR-670-3p                  | 1 |
| <i>circSV2B</i> | miR-670-5p                  | 2 |
| <i>circSV2B</i> | miR-6715a-3p                | 2 |
| <i>circSV2B</i> | miR-6720-5p                 | 1 |
| <i>circSV2B</i> | miR-6721-5p                 | 3 |
| <i>circSV2B</i> | miR-6728-5p                 | 1 |
| <i>circSV2B</i> | miR-6733-3p                 | 2 |
| <i>circSV2B</i> | miR-6734-3p                 | 3 |
| <i>circSV2B</i> | miR-6736-3p                 | 2 |
| <i>circSV2B</i> | miR-6737-5p/6812-5p/6819-5p | 1 |
| <i>circSV2B</i> | miR-6742-5p                 | 1 |
| <i>circSV2B</i> | miR-6744-5p                 | 3 |
| <i>circSV2B</i> | miR-6747-3p                 | 1 |
| <i>circSV2B</i> | miR-6752-3p                 | 2 |
| <i>circSV2B</i> | miR-6753-5p                 | 2 |
| <i>circSV2B</i> | miR-6758-5p/6856-5p         | 2 |
| <i>circSV2B</i> | miR-6759-5p                 | 1 |
| <i>circSV2B</i> | miR-676-5p                  | 2 |
| <i>circSV2B</i> | miR-6760-5p                 | 1 |
| <i>circSV2B</i> | miR-6761-5p                 | 1 |
| <i>circSV2B</i> | miR-6764-3p/6824-3p         | 3 |
| <i>circSV2B</i> | miR-6768-5p                 | 2 |
| <i>circSV2B</i> | miR-6769a-3p                | 1 |
| <i>circSV2B</i> | miR-6769a-5p/6769b-5p       | 1 |
| <i>circSV2B</i> | miR-6772-3p                 | 4 |
| <i>circSV2B</i> | miR-6773-3p                 | 1 |
| <i>circSV2B</i> | miR-6776-3p                 | 1 |
| <i>circSV2B</i> | miR-6778-3p                 | 2 |
| <i>circSV2B</i> | miR-6780a-3p                | 1 |
| <i>circSV2B</i> | miR-6784-3p/6862-3p         | 1 |
| <i>circSV2B</i> | miR-6789-3p                 | 3 |

|                 |                     |   |
|-----------------|---------------------|---|
| <i>circSV2B</i> | miR-6791-3p/6829-3p | 2 |
| <i>circSV2B</i> | miR-6793-3p         | 3 |
| <i>circSV2B</i> | miR-6795-3p         | 1 |
| <i>circSV2B</i> | miR-6796-5p         | 1 |
| <i>circSV2B</i> | miR-6799-5p         | 1 |
| <i>circSV2B</i> | miR-6800-3p         | 1 |
| <i>circSV2B</i> | miR-6809-3p         | 2 |
| <i>circSV2B</i> | miR-6810-5p         | 2 |
| <i>circSV2B</i> | miR-6813-3p         | 2 |
| <i>circSV2B</i> | miR-6814-5p         | 1 |
| <i>circSV2B</i> | miR-6815-3p         | 1 |
| <i>circSV2B</i> | miR-6817-3p         | 2 |
| <i>circSV2B</i> | miR-6822-3p         | 2 |
| <i>circSV2B</i> | miR-6823-5p         | 1 |
| <i>circSV2B</i> | miR-6826-3p         | 1 |
| <i>circSV2B</i> | miR-6827-5p         | 1 |
| <i>circSV2B</i> | miR-6829-5p         | 1 |
| <i>circSV2B</i> | miR-6832-5p         | 2 |
| <i>circSV2B</i> | miR-6840-3p         | 4 |
| <i>circSV2B</i> | miR-6843-3p/6848-3p | 2 |
| <i>circSV2B</i> | miR-6845-3p         | 2 |
| <i>circSV2B</i> | miR-6849-3p         | 4 |
| <i>circSV2B</i> | miR-6857-5p         | 2 |
| <i>circSV2B</i> | miR-6858-3p         | 4 |
| <i>circSV2B</i> | miR-6863            | 1 |
| <i>circSV2B</i> | miR-6864-5p         | 2 |
| <i>circSV2B</i> | miR-6866-5p         | 2 |
| <i>circSV2B</i> | miR-6867-3p         | 1 |
| <i>circSV2B</i> | miR-6868-3p         | 3 |
| <i>circSV2B</i> | miR-6868-5p         | 2 |
| <i>circSV2B</i> | miR-6870-3p         | 1 |
| <i>circSV2B</i> | miR-6871-3p         | 1 |
| <i>circSV2B</i> | miR-6872-3p         | 1 |
| <i>circSV2B</i> | miR-6873-5p         | 1 |
| <i>circSV2B</i> | miR-6874-5p         | 1 |
| <i>circSV2B</i> | miR-6875-3p         | 1 |
| <i>circSV2B</i> | miR-6880-5p         | 2 |
| <i>circSV2B</i> | miR-6881-3p         | 1 |

|                 |                           |   |
|-----------------|---------------------------|---|
| <i>circSV2B</i> | miR-6882-5p               | 1 |
| <i>circSV2B</i> | miR-6884-3p               | 4 |
| <i>circSV2B</i> | miR-6885-3p               | 2 |
| <i>circSV2B</i> | miR-6887-3p               | 1 |
| <i>circSV2B</i> | miR-6894-3p               | 1 |
| <i>circSV2B</i> | miR-6895-5p               | 3 |
| <i>circSV2B</i> | miR-7-5p                  | 2 |
| <i>circSV2B</i> | miR-7106-5p               | 1 |
| <i>circSV2B</i> | miR-7108-3p               | 2 |
| <i>circSV2B</i> | miR-7108-5p               | 2 |
| <i>circSV2B</i> | miR-7110-3p               | 2 |
| <i>circSV2B</i> | miR-7111-3p               | 1 |
| <i>circSV2B</i> | miR-7113-5p               | 2 |
| <i>circSV2B</i> | miR-7150                  | 3 |
| <i>circSV2B</i> | miR-7151-5p               | 3 |
| <i>circSV2B</i> | miR-7152-5p               | 2 |
| <i>circSV2B</i> | miR-7153-3p               | 2 |
| <i>circSV2B</i> | miR-7155-5p               | 1 |
| <i>circSV2B</i> | miR-7158-3p               | 6 |
| <i>circSV2B</i> | miR-7160-3p               | 3 |
| <i>circSV2B</i> | miR-7160-5p               | 2 |
| <i>circSV2B</i> | miR-7162-3p               | 3 |
| <i>circSV2B</i> | miR-760                   | 2 |
| <i>circSV2B</i> | miR-762/4492/4498/5001-5p | 1 |
| <i>circSV2B</i> | miR-766-3p                | 5 |
| <i>circSV2B</i> | miR-7702                  | 1 |
| <i>circSV2B</i> | miR-7704                  | 1 |
| <i>circSV2B</i> | miR-7843-3p               | 1 |
| <i>circSV2B</i> | miR-7844-5p               | 1 |
| <i>circSV2B</i> | miR-7846-3p               | 1 |
| <i>circSV2B</i> | miR-7850-5p               | 2 |
| <i>circSV2B</i> | miR-7854-3p               | 1 |
| <i>circSV2B</i> | miR-7977                  | 5 |
| <i>circSV2B</i> | miR-8056                  | 2 |
| <i>circSV2B</i> | miR-8060                  | 2 |
| <i>circSV2B</i> | miR-8063                  | 2 |
| <i>circSV2B</i> | miR-8064                  | 1 |
| <i>circSV2B</i> | miR-8071                  | 2 |

|                 |                         |   |
|-----------------|-------------------------|---|
| <i>circSV2B</i> | miR-8077                | 2 |
| <i>circSV2B</i> | miR-8083                | 2 |
| <i>circSV2B</i> | miR-873-3p              | 1 |
| <i>circSV2B</i> | miR-873-5p.1            | 6 |
| <i>circSV2B</i> | miR-874-5p              | 2 |
| <i>circSV2B</i> | miR-877-5p              | 2 |
| <i>circSV2B</i> | miR-887-5p              | 3 |
| <i>circSV2B</i> | miR-892-5p              | 1 |
| <i>circSV2B</i> | miR-892b                | 1 |
| <i>circSV2B</i> | miR-9-5p                | 2 |
| <i>circSV2B</i> | miR-92a-1-5p            | 1 |
| <i>circSV2B</i> | miR-92a-2-5p            | 1 |
| <i>circSV2B</i> | miR-937-5p              | 1 |
| <i>circSV2B</i> | miR-940/6808-5p/6893-5p | 2 |
| <i>circSV2B</i> | miR-942-3p              | 1 |
| <i>circSV2B</i> | miR-942-5p              | 2 |
| <i>circSV2B</i> | miR-96-3p               | 1 |
| <i>circSV2B</i> | let-7-5p/98-5p          | 1 |
| <i>circSV2B</i> | miR-1225-3p             | 1 |
| <i>circSV2B</i> | miR-1237-3p             | 1 |
| <i>circSV2B</i> | miR-1248                | 1 |
| <i>circSV2B</i> | miR-1252-3p             | 1 |
| <i>circSV2B</i> | miR-1276                | 1 |
| <i>circSV2B</i> | miR-129-3p              | 1 |
| <i>circSV2B</i> | miR-129-5p              | 1 |
| <i>circSV2B</i> | miR-1324                | 1 |
| <i>circSV2B</i> | miR-18-5p               | 2 |
| <i>circSV2B</i> | miR-18a-3p              | 1 |
| <i>circSV2B</i> | miR-1911-5p             | 1 |
| <i>circSV2B</i> | miR-203a-3p.1           | 2 |
| <i>circSV2B</i> | miR-208-3p              | 1 |
| <i>circSV2B</i> | miR-2114-3p             | 1 |
| <i>circSV2B</i> | miR-218-5p              | 1 |
| <i>circSV2B</i> | miR-219a-1-3p           | 1 |
| <i>circSV2B</i> | miR-224-5p              | 2 |
| <i>circSV2B</i> | miR-299-3p              | 1 |
| <i>circSV2B</i> | miR-3161                | 1 |
| <i>circSV2B</i> | miR-3182                | 1 |

|                 |                           |   |
|-----------------|---------------------------|---|
| <i>circSV2B</i> | miR-3198/4309             | 1 |
| <i>circSV2B</i> | miR-32-3p                 | 2 |
| <i>circSV2B</i> | miR-320e                  | 1 |
| <i>circSV2B</i> | miR-324-3p/1913           | 1 |
| <i>circSV2B</i> | miR-331-5p                | 1 |
| <i>circSV2B</i> | miR-345-5p                | 1 |
| <i>circSV2B</i> | miR-3607-3p               | 1 |
| <i>circSV2B</i> | miR-3607-5p               | 1 |
| <i>circSV2B</i> | miR-3611                  | 1 |
| <i>circSV2B</i> | miR-3613-5p               | 1 |
| <i>circSV2B</i> | miR-3614-3p               | 1 |
| <i>circSV2B</i> | miR-3646                  | 1 |
| <i>circSV2B</i> | miR-3657                  | 4 |
| <i>circSV2B</i> | miR-3688-5p               | 1 |
| <i>circSV2B</i> | miR-371-5p                | 2 |
| <i>circSV2B</i> | miR-371b-5p/373-5p/616-5p | 2 |
| <i>circSV2B</i> | miR-372-5p                | 2 |
| <i>circSV2B</i> | miR-380-5p/563            | 1 |
| <i>circSV2B</i> | miR-3909                  | 2 |
| <i>circSV2B</i> | miR-3928-5p/6806-3p       | 1 |
| <i>circSV2B</i> | miR-3929/4419b/4478       | 4 |
| <i>circSV2B</i> | miR-4290                  | 1 |
| <i>circSV2B</i> | miR-4297/5581-5p          | 1 |
| <i>circSV2B</i> | miR-4311                  | 1 |
| <i>circSV2B</i> | miR-4468                  | 1 |
| <i>circSV2B</i> | miR-4482-3p               | 1 |
| <i>circSV2B</i> | miR-4491/4657             | 1 |
| <i>circSV2B</i> | miR-4524b-3p              | 2 |
| <i>circSV2B</i> | miR-4527/6503-5p          | 1 |
| <i>circSV2B</i> | miR-4532                  | 1 |
| <i>circSV2B</i> | miR-4636                  | 1 |
| <i>circSV2B</i> | miR-4645-3p               | 1 |
| <i>circSV2B</i> | miR-4666a-5p              | 1 |
| <i>circSV2B</i> | miR-4669                  | 4 |
| <i>circSV2B</i> | miR-4678                  | 1 |
| <i>circSV2B</i> | miR-4687-5p               | 1 |
| <i>circSV2B</i> | miR-4690-3p/5685          | 1 |
| <i>circSV2B</i> | miR-4690-5p               | 1 |

|                 |                     |   |
|-----------------|---------------------|---|
| <i>circSV2B</i> | miR-493-3p          | 1 |
| <i>circSV2B</i> | miR-499a-5p         | 1 |
| <i>circSV2B</i> | miR-511-3p          | 1 |
| <i>circSV2B</i> | miR-5193            | 1 |
| <i>circSV2B</i> | miR-519d-5p         | 2 |
| <i>circSV2B</i> | miR-544a            | 1 |
| <i>circSV2B</i> | miR-548ao-5p/548ax  | 1 |
| <i>circSV2B</i> | miR-551b-5p         | 2 |
| <i>circSV2B</i> | miR-555             | 1 |
| <i>circSV2B</i> | miR-556-5p          | 1 |
| <i>circSV2B</i> | miR-5571-5p         | 1 |
| <i>circSV2B</i> | miR-5579-5p         | 1 |
| <i>circSV2B</i> | miR-5581-3p         | 2 |
| <i>circSV2B</i> | miR-5585-5p         | 1 |
| <i>circSV2B</i> | miR-5680            | 2 |
| <i>circSV2B</i> | miR-5682            | 1 |
| <i>circSV2B</i> | miR-5695            | 2 |
| <i>circSV2B</i> | miR-571             | 1 |
| <i>circSV2B</i> | miR-578             | 1 |
| <i>circSV2B</i> | miR-580-5p          | 1 |
| <i>circSV2B</i> | miR-581             | 2 |
| <i>circSV2B</i> | miR-583             | 1 |
| <i>circSV2B</i> | miR-585-5p          | 1 |
| <i>circSV2B</i> | miR-590-3p          | 2 |
| <i>circSV2B</i> | miR-604             | 2 |
| <i>circSV2B</i> | miR-6071            | 1 |
| <i>circSV2B</i> | miR-616-3p          | 1 |
| <i>circSV2B</i> | miR-6165            | 1 |
| <i>circSV2B</i> | miR-641/3617-5p     | 1 |
| <i>circSV2B</i> | miR-6510-3p         | 1 |
| <i>circSV2B</i> | miR-6510-5p         | 1 |
| <i>circSV2B</i> | miR-660-3p          | 1 |
| <i>circSV2B</i> | miR-671-5p          | 1 |
| <i>circSV2B</i> | miR-6738-3p         | 1 |
| <i>circSV2B</i> | miR-6740-3p         | 1 |
| <i>circSV2B</i> | miR-6753-3p/7107-3p | 1 |
| <i>circSV2B</i> | miR-676-3p          | 4 |
| <i>circSV2B</i> | miR-6762-3p         | 2 |

|                 |                                      |   |
|-----------------|--------------------------------------|---|
| <i>circSV2B</i> | miR-6779-3p                          | 1 |
| <i>circSV2B</i> | miR-6807-5p                          | 1 |
| <i>circSV2B</i> | miR-6815-5p/6865-5p                  | 1 |
| <i>circSV2B</i> | miR-6828-3p                          | 1 |
| <i>circSV2B</i> | miR-6828-5p                          | 1 |
| <i>circSV2B</i> | miR-6882-3p                          | 1 |
| <i>circSV2B</i> | miR-7159-3p                          | 1 |
| <i>circSV2B</i> | miR-758-3p                           | 1 |
| <i>circSV2B</i> | miR-758-5p                           | 1 |
| <i>circSV2B</i> | miR-764                              | 1 |
| <i>circSV2B</i> | miR-767-3p                           | 1 |
| <i>circSV2B</i> | miR-7847-3p                          | 1 |
| <i>circSV2B</i> | miR-7849-3p                          | 1 |
| <i>circSV2B</i> | miR-8066                             | 1 |
| <i>circSV2B</i> | miR-8069                             | 3 |
| <i>circSV2B</i> | miR-877-3p                           | 2 |
| <i>circSV2B</i> | miR-885-3p                           | 1 |
| <i>circSV2B</i> | miR-891a-3p                          | 1 |
| <i>circSV2B</i> | miR-103-3p/107                       | 3 |
| <i>circSV2B</i> | miR-106a-3p                          | 1 |
| <i>circSV2B</i> | miR-1179                             | 1 |
| <i>circSV2B</i> | miR-1184                             | 1 |
| <i>circSV2B</i> | miR-1202/3972                        | 1 |
| <i>circSV2B</i> | miR-1205                             | 1 |
| <i>circSV2B</i> | miR-1208                             | 2 |
| <i>circSV2B</i> | miR-1260a/1260b                      | 1 |
| <i>circSV2B</i> | miR-1273g-3p                         | 1 |
| <i>circSV2B</i> | miR-1273h-3p                         | 2 |
| <i>circSV2B</i> | miR-1304-3p                          | 2 |
| <i>circSV2B</i> | miR-140-3p.1                         | 1 |
| <i>circSV2B</i> | miR-146a-3p                          | 2 |
| <i>circSV2B</i> | miR-15-5p/16-5p/195-5p/424-5p/497-5p | 5 |
| <i>circSV2B</i> | miR-17-3p                            | 1 |
| <i>circSV2B</i> | miR-181-3p/4420                      | 2 |
| <i>circSV2B</i> | miR-188-3p                           | 1 |
| <i>circSV2B</i> | miR-192-3p                           | 1 |
| <i>circSV2B</i> | miR-214-3p/3619-5p                   | 3 |
| <i>circSV2B</i> | miR-217                              | 1 |

|                 |                                     |   |
|-----------------|-------------------------------------|---|
| <i>circSV2B</i> | miR-2276-3p                         | 1 |
| <i>circSV2B</i> | miR-23-3p                           | 3 |
| <i>circSV2B</i> | miR-2355-3p                         | 1 |
| <i>circSV2B</i> | miR-25-3p/32-5p/92-3p/363-3p/367-3p | 1 |
| <i>circSV2B</i> | miR-3064-3p                         | 1 |
| <i>circSV2B</i> | miR-3156-3p                         | 1 |
| <i>circSV2B</i> | miR-3158-5p                         | 1 |
| <i>circSV2B</i> | miR-3180-5p                         | 2 |
| <i>circSV2B</i> | miR-3622a-5p                        | 1 |
| <i>circSV2B</i> | miR-3655                            | 1 |
| <i>circSV2B</i> | miR-3678-3p                         | 2 |
| <i>circSV2B</i> | miR-3680-5p                         | 2 |
| <i>circSV2B</i> | miR-374b-3p                         | 1 |
| <i>circSV2B</i> | miR-4269/6715b-5p                   | 1 |
| <i>circSV2B</i> | miR-4317                            | 1 |
| <i>circSV2B</i> | miR-4318                            | 1 |
| <i>circSV2B</i> | miR-4423-5p                         | 1 |
| <i>circSV2B</i> | miR-4433a-5p                        | 1 |
| <i>circSV2B</i> | miR-4433b-5p                        | 1 |
| <i>circSV2B</i> | miR-4463                            | 1 |
| <i>circSV2B</i> | miR-4494                            | 2 |
| <i>circSV2B</i> | miR-4499                            | 1 |
| <i>circSV2B</i> | miR-4514/4692                       | 1 |
| <i>circSV2B</i> | miR-452-5p/892-3p                   | 1 |
| <i>circSV2B</i> | miR-4646-3p                         | 1 |
| <i>circSV2B</i> | miR-4677-3p                         | 2 |
| <i>circSV2B</i> | miR-4679                            | 2 |
| <i>circSV2B</i> | miR-4700-3p                         | 1 |
| <i>circSV2B</i> | miR-4742-5p                         | 1 |
| <i>circSV2B</i> | miR-4769-3p/6817-5p                 | 1 |
| <i>circSV2B</i> | miR-4772-3p                         | 1 |
| <i>circSV2B</i> | miR-4776-3p                         | 1 |
| <i>circSV2B</i> | miR-4798-3p                         | 2 |
| <i>circSV2B</i> | miR-4802-5p                         | 1 |
| <i>circSV2B</i> | miR-499b-5p                         | 2 |
| <i>circSV2B</i> | miR-5002-3p                         | 1 |
| <i>circSV2B</i> | miR-5006-5p                         | 1 |
| <i>circSV2B</i> | miR-503-5p                          | 5 |



|                 |                          |   |
|-----------------|--------------------------|---|
| <i>circSV2B</i> | miR-509-3-5p/509-5p/4418 | 1 |
| <i>circSV2B</i> | miR-5186                 | 1 |
| <i>circSV2B</i> | miR-5582-5p              | 1 |
| <i>circSV2B</i> | miR-589-3p               | 1 |
| <i>circSV2B</i> | miR-646                  | 5 |
| <i>circSV2B</i> | miR-6501-5p              | 1 |
| <i>circSV2B</i> | miR-6514-5p              | 1 |
| <i>circSV2B</i> | miR-6516-5p              | 1 |
| <i>circSV2B</i> | miR-653-3p               | 2 |
| <i>circSV2B</i> | miR-6760-3p              | 2 |
| <i>circSV2B</i> | miR-6890-3p              | 1 |
| <i>circSV2B</i> | miR-744-3p               | 4 |
| <i>circSV2B</i> | miR-8070                 | 2 |
| <i>circSV2B</i> | miR-892a                 | 1 |
| <i>circSV2B</i> | miR-922                  | 3 |
| <i>circSV2B</i> | miR-1207-3p              | 1 |
| <i>circSV2B</i> | miR-1207-5p/4763-3p      | 2 |
| <i>circSV2B</i> | miR-1243                 | 1 |
| <i>circSV2B</i> | miR-1253                 | 2 |
| <i>circSV2B</i> | miR-1255b-2-3p           | 2 |
| <i>circSV2B</i> | miR-1262/4701-3p/6736-5p | 1 |
| <i>circSV2B</i> | miR-1266-5p/4518         | 1 |
| <i>circSV2B</i> | miR-1270                 | 1 |
| <i>circSV2B</i> | miR-1277-5p              | 1 |
| <i>circSV2B</i> | miR-1279                 | 1 |
| <i>circSV2B</i> | miR-1286                 | 2 |
| <i>circSV2B</i> | miR-1288-3p              | 1 |
| <i>circSV2B</i> | miR-1293/4483            | 1 |
| <i>circSV2B</i> | miR-1296-3p              | 1 |
| <i>circSV2B</i> | miR-1299                 | 1 |
| <i>circSV2B</i> | miR-1305                 | 1 |
| <i>circSV2B</i> | miR-1343-3p              | 2 |
| <i>circSV2B</i> | miR-147a                 | 1 |
| <i>circSV2B</i> | miR-153-3p               | 2 |
| <i>circSV2B</i> | miR-190a-3p              | 1 |
| <i>circSV2B</i> | miR-1915-5p              | 1 |
| <i>circSV2B</i> | miR-196b-3p              | 1 |
| <i>circSV2B</i> | miR-1973                 | 1 |

|                 |                           |   |
|-----------------|---------------------------|---|
| <i>circSV2B</i> | miR-200-3p/429            | 1 |
| <i>circSV2B</i> | miR-204-3p/4646-5p        | 1 |
| <i>circSV2B</i> | miR-205-3p                | 2 |
| <i>circSV2B</i> | miR-2053                  | 1 |
| <i>circSV2B</i> | miR-208-5p                | 1 |
| <i>circSV2B</i> | miR-2115-3p               | 1 |
| <i>circSV2B</i> | miR-2276-5p               | 1 |
| <i>circSV2B</i> | miR-2277-3p               | 1 |
| <i>circSV2B</i> | miR-2392                  | 2 |
| <i>circSV2B</i> | miR-24-3p                 | 1 |
| <i>circSV2B</i> | miR-26b-3p                | 2 |
| <i>circSV2B</i> | miR-27b-5p                | 1 |
| <i>circSV2B</i> | miR-29b-1-5p              | 1 |
| <i>circSV2B</i> | miR-3064-5p               | 2 |
| <i>circSV2B</i> | miR-3065-5p               | 2 |
| <i>circSV2B</i> | miR-3119                  | 1 |
| <i>circSV2B</i> | miR-3123                  | 3 |
| <i>circSV2B</i> | miR-3124-3p               | 2 |
| <i>circSV2B</i> | miR-3135a                 | 1 |
| <i>circSV2B</i> | miR-3144-5p               | 2 |
| <i>circSV2B</i> | miR-3146                  | 1 |
| <i>circSV2B</i> | miR-3147                  | 1 |
| <i>circSV2B</i> | miR-3148                  | 1 |
| <i>circSV2B</i> | miR-3154                  | 2 |
| <i>circSV2B</i> | miR-3160-5p               | 2 |
| <i>circSV2B</i> | miR-3179                  | 2 |
| <i>circSV2B</i> | miR-3190-3p               | 1 |
| <i>circSV2B</i> | miR-3191-3p               | 2 |
| <i>circSV2B</i> | miR-3192-5p               | 1 |
| <i>circSV2B</i> | miR-3194-3p               | 1 |
| <i>circSV2B</i> | miR-323b-5p/410-5p/494-5p | 2 |
| <i>circSV2B</i> | miR-34-5p/449-5p          | 2 |
| <i>circSV2B</i> | miR-3614-5p               | 1 |
| <i>circSV2B</i> | miR-3615                  | 2 |
| <i>circSV2B</i> | miR-3619-3p               | 2 |
| <i>circSV2B</i> | miR-3622a-3p/3622b-3p     | 1 |
| <i>circSV2B</i> | miR-363-5p/6745           | 1 |
| <i>circSV2B</i> | miR-3649                  | 2 |

|                 |                                   |   |
|-----------------|-----------------------------------|---|
| <i>circSV2B</i> | miR-3654                          | 1 |
| <i>circSV2B</i> | miR-3664-3p                       | 1 |
| <i>circSV2B</i> | miR-3671                          | 1 |
| <i>circSV2B</i> | miR-3675-5p                       | 2 |
| <i>circSV2B</i> | miR-3680-3p                       | 2 |
| <i>circSV2B</i> | miR-3681-5p                       | 1 |
| <i>circSV2B</i> | miR-3682-5p                       | 1 |
| <i>circSV2B</i> | miR-3687/4442                     | 2 |
| <i>circSV2B</i> | miR-3689a-5p/3689b-5p/3689e/3689f | 3 |
| <i>circSV2B</i> | miR-369-5p                        | 2 |
| <i>circSV2B</i> | miR-3690                          | 2 |
| <i>circSV2B</i> | miR-3713                          | 1 |
| <i>circSV2B</i> | miR-374-5p                        | 1 |
| <i>circSV2B</i> | miR-375                           | 1 |
| <i>circSV2B</i> | miR-376c-3p                       | 1 |
| <i>circSV2B</i> | miR-378-3p                        | 2 |
| <i>circSV2B</i> | miR-383-5p.1                      | 1 |
| <i>circSV2B</i> | miR-383-5p.2                      | 1 |
| <i>circSV2B</i> | miR-3912-3p                       | 1 |
| <i>circSV2B</i> | miR-3914                          | 1 |
| <i>circSV2B</i> | miR-3925-5p                       | 3 |
| <i>circSV2B</i> | miR-3934-3p                       | 1 |
| <i>circSV2B</i> | miR-3935                          | 1 |
| <i>circSV2B</i> | miR-410-3p                        | 1 |
| <i>circSV2B</i> | miR-4254                          | 2 |
| <i>circSV2B</i> | miR-4263                          | 1 |
| <i>circSV2B</i> | miR-4266                          | 2 |
| <i>circSV2B</i> | miR-4268                          | 1 |
| <i>circSV2B</i> | miR-4278                          | 1 |
| <i>circSV2B</i> | miR-4284                          | 1 |
| <i>circSV2B</i> | miR-4287/4685-3p                  | 1 |
| <i>circSV2B</i> | miR-432-3p                        | 2 |
| <i>circSV2B</i> | miR-432-5p                        | 1 |
| <i>circSV2B</i> | miR-4325                          | 2 |
| <i>circSV2B</i> | miR-4327                          | 1 |
| <i>circSV2B</i> | miR-4424                          | 1 |
| <i>circSV2B</i> | miR-4425                          | 1 |
| <i>circSV2B</i> | miR-4432                          | 1 |

|                 |                     |   |
|-----------------|---------------------|---|
| <i>circSV2B</i> | miR-4434/4516/5703  | 2 |
| <i>circSV2B</i> | miR-4443            | 1 |
| <i>circSV2B</i> | miR-4444            | 3 |
| <i>circSV2B</i> | miR-4448            | 1 |
| <i>circSV2B</i> | miR-4455            | 1 |
| <i>circSV2B</i> | miR-4461            | 2 |
| <i>circSV2B</i> | miR-4469            | 1 |
| <i>circSV2B</i> | miR-448             | 2 |
| <i>circSV2B</i> | miR-4480            | 1 |
| <i>circSV2B</i> | miR-4481/4745-5p    | 1 |
| <i>circSV2B</i> | miR-450b-5p         | 2 |
| <i>circSV2B</i> | miR-4515            | 1 |
| <i>circSV2B</i> | miR-4517            | 1 |
| <i>circSV2B</i> | miR-4520-2-3p       | 1 |
| <i>circSV2B</i> | miR-4522            | 1 |
| <i>circSV2B</i> | miR-4529-3p         | 1 |
| <i>circSV2B</i> | miR-4531            | 1 |
| <i>circSV2B</i> | miR-4638-3p         | 2 |
| <i>circSV2B</i> | miR-4652-5p         | 2 |
| <i>circSV2B</i> | miR-466             | 1 |
| <i>circSV2B</i> | miR-4660            | 1 |
| <i>circSV2B</i> | miR-4671-5p         | 2 |
| <i>circSV2B</i> | miR-4682            | 1 |
| <i>circSV2B</i> | miR-4687-3p         | 2 |
| <i>circSV2B</i> | miR-4691-5p/6792-3p | 2 |
| <i>circSV2B</i> | miR-4719            | 1 |
| <i>circSV2B</i> | miR-4722-5p         | 2 |
| <i>circSV2B</i> | miR-4725-5p         | 1 |
| <i>circSV2B</i> | miR-4735-5p         | 2 |
| <i>circSV2B</i> | miR-4736            | 2 |
| <i>circSV2B</i> | miR-4740-5p         | 1 |
| <i>circSV2B</i> | miR-4752            | 2 |
| <i>circSV2B</i> | miR-4761-5p         | 1 |
| <i>circSV2B</i> | miR-4762-3p         | 1 |
| <i>circSV2B</i> | miR-4762-5p         | 1 |
| <i>circSV2B</i> | miR-4772-5p         | 1 |
| <i>circSV2B</i> | miR-4777-5p         | 1 |
| <i>circSV2B</i> | miR-4782-5p/5706    | 1 |

|                 |                             |   |
|-----------------|-----------------------------|---|
| <i>circSV2B</i> | miR-4803                    | 1 |
| <i>circSV2B</i> | miR-487a-5p/487b-5p         | 2 |
| <i>circSV2B</i> | miR-490-3p                  | 1 |
| <i>circSV2B</i> | miR-492                     | 2 |
| <i>circSV2B</i> | miR-496.1                   | 1 |
| <i>circSV2B</i> | miR-498                     | 1 |
| <i>circSV2B</i> | miR-499a-3p/499b-3p         | 2 |
| <i>circSV2B</i> | miR-5000-3p                 | 2 |
| <i>circSV2B</i> | miR-5003-3p                 | 1 |
| <i>circSV2B</i> | miR-5009-3p                 | 1 |
| <i>circSV2B</i> | miR-500a-5p                 | 1 |
| <i>circSV2B</i> | miR-5011-5p                 | 1 |
| <i>circSV2B</i> | miR-502-5p                  | 1 |
| <i>circSV2B</i> | miR-505-3p.1                | 1 |
| <i>circSV2B</i> | miR-507/557                 | 2 |
| <i>circSV2B</i> | miR-5089-3p                 | 1 |
| <i>circSV2B</i> | miR-513a-3p/513c-3p/3606-3p | 2 |
| <i>circSV2B</i> | miR-514a-3p                 | 1 |
| <i>circSV2B</i> | miR-516a-5p                 | 4 |
| <i>circSV2B</i> | miR-516b-5p                 | 1 |
| <i>circSV2B</i> | miR-518a-5p/527             | 1 |
| <i>circSV2B</i> | miR-518d-5p/519-5p          | 1 |
| <i>circSV2B</i> | miR-520f-5p                 | 2 |
| <i>circSV2B</i> | miR-524-5p                  | 1 |
| <i>circSV2B</i> | miR-539-5p                  | 2 |
| <i>circSV2B</i> | miR-548au-3p                | 2 |
| <i>circSV2B</i> | miR-548aw                   | 1 |
| <i>circSV2B</i> | miR-548az-5p/548t-5p        | 1 |
| <i>circSV2B</i> | miR-548n                    | 1 |
| <i>circSV2B</i> | miR-548p                    | 2 |
| <i>circSV2B</i> | miR-5580-3p                 | 1 |
| <i>circSV2B</i> | miR-5583-3p                 | 1 |
| <i>circSV2B</i> | miR-5684                    | 1 |
| <i>circSV2B</i> | miR-5691                    | 1 |
| <i>circSV2B</i> | miR-5694                    | 1 |
| <i>circSV2B</i> | miR-5700                    | 1 |
| <i>circSV2B</i> | miR-576-3p                  | 1 |
| <i>circSV2B</i> | miR-576-5p                  | 1 |

|                 |                     |   |
|-----------------|---------------------|---|
| <i>circSV2B</i> | miR-582-3p          | 2 |
| <i>circSV2B</i> | miR-586             | 2 |
| <i>circSV2B</i> | miR-593-3p          | 2 |
| <i>circSV2B</i> | miR-593-5p          | 1 |
| <i>circSV2B</i> | miR-595             | 2 |
| <i>circSV2B</i> | miR-600             | 1 |
| <i>circSV2B</i> | miR-609             | 1 |
| <i>circSV2B</i> | miR-6124            | 1 |
| <i>circSV2B</i> | miR-619-3p          | 1 |
| <i>circSV2B</i> | miR-619-5p/6506-5p  | 1 |
| <i>circSV2B</i> | miR-627-3p          | 3 |
| <i>circSV2B</i> | miR-649             | 1 |
| <i>circSV2B</i> | miR-6500-3p         | 1 |
| <i>circSV2B</i> | miR-6507-3p         | 1 |
| <i>circSV2B</i> | miR-6515-5p         | 1 |
| <i>circSV2B</i> | miR-652-3p          | 2 |
| <i>circSV2B</i> | miR-659-3p          | 2 |
| <i>circSV2B</i> | miR-659-5p          | 2 |
| <i>circSV2B</i> | miR-6715b-3p        | 1 |
| <i>circSV2B</i> | miR-6739-3p         | 2 |
| <i>circSV2B</i> | miR-6741-5p         | 1 |
| <i>circSV2B</i> | miR-6742-3p         | 1 |
| <i>circSV2B</i> | miR-6748-5p         | 1 |
| <i>circSV2B</i> | miR-6749-3p         | 2 |
| <i>circSV2B</i> | miR-6756-5p/6766-5p | 1 |
| <i>circSV2B</i> | miR-6759-3p         | 2 |
| <i>circSV2B</i> | miR-6765-3p         | 1 |
| <i>circSV2B</i> | miR-6770-5p         | 2 |
| <i>circSV2B</i> | miR-6772-5p         | 1 |
| <i>circSV2B</i> | miR-6776-5p         | 1 |
| <i>circSV2B</i> | miR-6782-3p         | 2 |
| <i>circSV2B</i> | miR-6782-5p         | 1 |
| <i>circSV2B</i> | miR-6789-5p         | 1 |
| <i>circSV2B</i> | miR-6793-5p         | 1 |
| <i>circSV2B</i> | miR-6800-5p         | 1 |
| <i>circSV2B</i> | miR-6802-5p         | 1 |
| <i>circSV2B</i> | miR-6814-3p/6872-5p | 1 |
| <i>circSV2B</i> | miR-6818-5p         | 1 |

|                 |              |   |
|-----------------|--------------|---|
| <i>circSV2B</i> | miR-6824-5p  | 1 |
| <i>circSV2B</i> | miR-6830-5p  | 1 |
| <i>circSV2B</i> | miR-6833-5p  | 2 |
| <i>circSV2B</i> | miR-6838-3p  | 1 |
| <i>circSV2B</i> | miR-6841-3p  | 1 |
| <i>circSV2B</i> | miR-6852-5p  | 1 |
| <i>circSV2B</i> | miR-6861-3p  | 2 |
| <i>circSV2B</i> | miR-6861-5p  | 1 |
| <i>circSV2B</i> | miR-6867-5p  | 1 |
| <i>circSV2B</i> | miR-6873-3p  | 2 |
| <i>circSV2B</i> | miR-6879-3p  | 1 |
| <i>circSV2B</i> | miR-6888-5p  | 2 |
| <i>circSV2B</i> | miR-6890-5p  | 2 |
| <i>circSV2B</i> | miR-6892-3p  | 1 |
| <i>circSV2B</i> | miR-6892-5p  | 1 |
| <i>circSV2B</i> | miR-6894-5p  | 1 |
| <i>circSV2B</i> | miR-6895-3p  | 2 |
| <i>circSV2B</i> | miR-708-3p   | 1 |
| <i>circSV2B</i> | miR-7109-3p  | 1 |
| <i>circSV2B</i> | miR-7113-3p  | 1 |
| <i>circSV2B</i> | miR-7154-3p  | 1 |
| <i>circSV2B</i> | miR-7158-5p  | 1 |
| <i>circSV2B</i> | miR-7161-3p  | 1 |
| <i>circSV2B</i> | miR-7515     | 2 |
| <i>circSV2B</i> | miR-759      | 1 |
| <i>circSV2B</i> | miR-765      | 1 |
| <i>circSV2B</i> | miR-766-5p   | 1 |
| <i>circSV2B</i> | miR-7703     | 2 |
| <i>circSV2B</i> | miR-7851-3p  | 1 |
| <i>circSV2B</i> | miR-7974     | 2 |
| <i>circSV2B</i> | miR-8057     | 1 |
| <i>circSV2B</i> | miR-8084     | 1 |
| <i>circSV2B</i> | miR-8087     | 1 |
| <i>circSV2B</i> | miR-873-5p.2 | 2 |
| <i>circSV2B</i> | miR-890      | 1 |
| <i>circSV2B</i> | miR-924      | 2 |
| <i>circSV2B</i> | miR-939-3p   | 1 |
| <i>circSV2B</i> | miR-944      | 1 |

|                  |                       |   |
|------------------|-----------------------|---|
| <i>circTASP1</i> | miR-1-3p/206          | 2 |
| <i>circTASP1</i> | miR-1207-3p           | 3 |
| <i>circTASP1</i> | miR-1207-5p/4763-3p   | 1 |
| <i>circTASP1</i> | miR-1243              | 2 |
| <i>circTASP1</i> | miR-1246              | 3 |
| <i>circTASP1</i> | miR-1252-3p           | 1 |
| <i>circTASP1</i> | miR-1266-5p/4518      | 1 |
| <i>circTASP1</i> | miR-1273g-5p          | 1 |
| <i>circTASP1</i> | miR-1286              | 2 |
| <i>circTASP1</i> | miR-1293/4483         | 1 |
| <i>circTASP1</i> | miR-130b-5p           | 2 |
| <i>circTASP1</i> | miR-140-3p.1          | 2 |
| <i>circTASP1</i> | miR-140-5p            | 1 |
| <i>circTASP1</i> | miR-145-5p            | 1 |
| <i>circTASP1</i> | miR-146a-3p           | 1 |
| <i>circTASP1</i> | miR-1587/3620-5p      | 2 |
| <i>circTASP1</i> | miR-1825              | 1 |
| <i>circTASP1</i> | miR-185-5p            | 1 |
| <i>circTASP1</i> | miR-186-5p            | 3 |
| <i>circTASP1</i> | miR-1911-5p           | 1 |
| <i>circTASP1</i> | miR-194-3p            | 1 |
| <i>circTASP1</i> | miR-199-5p            | 1 |
| <i>circTASP1</i> | miR-200-3p/429        | 2 |
| <i>circTASP1</i> | miR-203a-5p           | 1 |
| <i>circTASP1</i> | miR-20a-3p            | 1 |
| <i>circTASP1</i> | miR-219a-1-3p         | 1 |
| <i>circTASP1</i> | miR-22-3p             | 2 |
| <i>circTASP1</i> | miR-2392              | 3 |
| <i>circTASP1</i> | miR-2467-5p           | 1 |
| <i>circTASP1</i> | miR-28-3p             | 1 |
| <i>circTASP1</i> | miR-298               | 3 |
| <i>circTASP1</i> | miR-299-3p            | 2 |
| <i>circTASP1</i> | miR-3120-5p           | 1 |
| <i>circTASP1</i> | miR-3125/3916/6859-5p | 1 |
| <i>circTASP1</i> | miR-3128              | 2 |
| <i>circTASP1</i> | miR-3129-3p/5583-5p   | 1 |
| <i>circTASP1</i> | miR-3133              | 3 |
| <i>circTASP1</i> | miR-3138              | 2 |



|                  |                           |   |
|------------------|---------------------------|---|
| <i>circTASP1</i> | miR-3145-5p               | 2 |
| <i>circTASP1</i> | miR-3147                  | 1 |
| <i>circTASP1</i> | miR-3159                  | 1 |
| <i>circTASP1</i> | miR-3160-3p               | 1 |
| <i>circTASP1</i> | miR-3162-3p               | 2 |
| <i>circTASP1</i> | miR-3165                  | 1 |
| <i>circTASP1</i> | miR-3175                  | 1 |
| <i>circTASP1</i> | miR-3179                  | 3 |
| <i>circTASP1</i> | miR-3188                  | 1 |
| <i>circTASP1</i> | miR-323b-5p/410-5p/494-5p | 1 |
| <i>circTASP1</i> | miR-33-5p                 | 1 |
| <i>circTASP1</i> | miR-335-5p                | 1 |
| <i>circTASP1</i> | miR-33a-3p                | 1 |
| <i>circTASP1</i> | miR-3612                  | 1 |
| <i>circTASP1</i> | miR-3619-3p               | 1 |
| <i>circTASP1</i> | miR-3622a-5p              | 1 |
| <i>circTASP1</i> | miR-363-5p/6745           | 1 |
| <i>circTASP1</i> | miR-3646                  | 1 |
| <i>circTASP1</i> | miR-3654                  | 2 |
| <i>circTASP1</i> | miR-3662                  | 1 |
| <i>circTASP1</i> | miR-3664-3p               | 1 |
| <i>circTASP1</i> | miR-3670                  | 2 |
| <i>circTASP1</i> | miR-3681-5p               | 1 |
| <i>circTASP1</i> | miR-3692-5p               | 4 |
| <i>circTASP1</i> | miR-378g                  | 2 |
| <i>circTASP1</i> | miR-3925-3p               | 1 |
| <i>circTASP1</i> | miR-3928-3p               | 1 |
| <i>circTASP1</i> | miR-3975                  | 1 |
| <i>circTASP1</i> | miR-409-3p                | 1 |
| <i>circTASP1</i> | miR-4259                  | 2 |
| <i>circTASP1</i> | miR-4261                  | 1 |
| <i>circTASP1</i> | miR-4269/6715b-5p         | 1 |
| <i>circTASP1</i> | miR-4312                  | 1 |
| <i>circTASP1</i> | miR-432-3p                | 3 |
| <i>circTASP1</i> | miR-4320                  | 2 |
| <i>circTASP1</i> | miR-4328                  | 1 |
| <i>circTASP1</i> | miR-4425                  | 1 |
| <i>circTASP1</i> | miR-4443                  | 1 |

|                  |                             |   |
|------------------|-----------------------------|---|
| <i>circTASP1</i> | miR-4462                    | 1 |
| <i>circTASP1</i> | miR-4474-3p                 | 2 |
| <i>circTASP1</i> | miR-4475                    | 1 |
| <i>circTASP1</i> | miR-4486                    | 2 |
| <i>circTASP1</i> | miR-4487                    | 1 |
| <i>circTASP1</i> | miR-4491/4657               | 2 |
| <i>circTASP1</i> | miR-4496                    | 1 |
| <i>circTASP1</i> | miR-4497                    | 1 |
| <i>circTASP1</i> | miR-4509                    | 1 |
| <i>circTASP1</i> | miR-4514/4692               | 1 |
| <i>circTASP1</i> | miR-4520-2-3p               | 1 |
| <i>circTASP1</i> | miR-4520-3p                 | 2 |
| <i>circTASP1</i> | miR-4529-3p                 | 1 |
| <i>circTASP1</i> | miR-4535                    | 1 |
| <i>circTASP1</i> | miR-4633-3p/6500-5p         | 2 |
| <i>circTASP1</i> | miR-4635                    | 1 |
| <i>circTASP1</i> | miR-4656                    | 2 |
| <i>circTASP1</i> | miR-4674                    | 2 |
| <i>circTASP1</i> | miR-4675/4741               | 2 |
| <i>circTASP1</i> | miR-4677-3p                 | 1 |
| <i>circTASP1</i> | miR-4679                    | 1 |
| <i>circTASP1</i> | miR-4693-3p                 | 1 |
| <i>circTASP1</i> | miR-4715-5p                 | 2 |
| <i>circTASP1</i> | miR-4720-5p/4799-3p/5588-5p | 2 |
| <i>circTASP1</i> | miR-4722-5p                 | 2 |
| <i>circTASP1</i> | miR-4729                    | 1 |
| <i>circTASP1</i> | miR-4731-5p                 | 2 |
| <i>circTASP1</i> | miR-4736                    | 1 |
| <i>circTASP1</i> | miR-4738-3p                 | 1 |
| <i>circTASP1</i> | miR-4742-5p                 | 1 |
| <i>circTASP1</i> | miR-4744                    | 1 |
| <i>circTASP1</i> | miR-4752                    | 1 |
| <i>circTASP1</i> | miR-4764-5p                 | 2 |
| <i>circTASP1</i> | miR-4766-5p                 | 3 |
| <i>circTASP1</i> | miR-4776-5p                 | 1 |
| <i>circTASP1</i> | miR-4777-3p                 | 1 |
| <i>circTASP1</i> | miR-4781-3p                 | 1 |
| <i>circTASP1</i> | miR-4800-5p                 | 2 |

|                  |                                      |   |
|------------------|--------------------------------------|---|
| <i>circTASP1</i> | miR-485-5p                           | 1 |
| <i>circTASP1</i> | miR-491-3p                           | 1 |
| <i>circTASP1</i> | miR-494-3p                           | 2 |
| <i>circTASP1</i> | miR-504-3p                           | 1 |
| <i>circTASP1</i> | miR-506-5p                           | 1 |
| <i>circTASP1</i> | miR-508-5p                           | 2 |
| <i>circTASP1</i> | miR-510-3p                           | 1 |
| <i>circTASP1</i> | miR-512-5p                           | 1 |
| <i>circTASP1</i> | miR-515-5p/519e-5p                   | 1 |
| <i>circTASP1</i> | miR-5192                             | 1 |
| <i>circTASP1</i> | miR-5195-5p                          | 2 |
| <i>circTASP1</i> | miR-5197-3p                          | 1 |
| <i>circTASP1</i> | miR-520g-5p                          | 1 |
| <i>circTASP1</i> | miR-558                              | 1 |
| <i>circTASP1</i> | miR-5580-5p                          | 2 |
| <i>circTASP1</i> | miR-5582-5p                          | 1 |
| <i>circTASP1</i> | miR-5584-5p                          | 1 |
| <i>circTASP1</i> | miR-5589-5p                          | 2 |
| <i>circTASP1</i> | miR-5681a                            | 1 |
| <i>circTASP1</i> | miR-5683                             | 2 |
| <i>circTASP1</i> | miR-5691                             | 2 |
| <i>circTASP1</i> | miR-5693                             | 1 |
| <i>circTASP1</i> | miR-571                              | 1 |
| <i>circTASP1</i> | miR-602                              | 1 |
| <i>circTASP1</i> | miR-604                              | 2 |
| <i>circTASP1</i> | miR-612/1285-3p/3187-5p/5189-5p/6860 | 2 |
| <i>circTASP1</i> | miR-624-5p                           | 1 |
| <i>circTASP1</i> | miR-626/6876-3p                      | 1 |
| <i>circTASP1</i> | miR-642-3p                           | 1 |
| <i>circTASP1</i> | miR-647                              | 2 |
| <i>circTASP1</i> | miR-6515-5p                          | 1 |
| <i>circTASP1</i> | miR-653-5p                           | 1 |
| <i>circTASP1</i> | miR-6716-5p                          | 1 |
| <i>circTASP1</i> | miR-6721-5p                          | 3 |
| <i>circTASP1</i> | miR-6730-5p                          | 1 |
| <i>circTASP1</i> | miR-6731-5p/8085                     | 1 |
| <i>circTASP1</i> | miR-6750-5p/6822-5p                  | 1 |
| <i>circTASP1</i> | miR-6756-5p/6766-5p                  | 1 |

|                  |                           |   |
|------------------|---------------------------|---|
| <i>circTASP1</i> | miR-6762-3p               | 2 |
| <i>circTASP1</i> | miR-6768-5p               | 1 |
| <i>circTASP1</i> | miR-6777-5p/6889-5p       | 1 |
| <i>circTASP1</i> | miR-6784-5p               | 1 |
| <i>circTASP1</i> | miR-6787-3p               | 1 |
| <i>circTASP1</i> | miR-6806-5p               | 1 |
| <i>circTASP1</i> | miR-6818-3p               | 1 |
| <i>circTASP1</i> | miR-6825-5p               | 1 |
| <i>circTASP1</i> | miR-6829-5p               | 2 |
| <i>circTASP1</i> | miR-6833-5p               | 1 |
| <i>circTASP1</i> | miR-6842-3p               | 2 |
| <i>circTASP1</i> | miR-6847-3p               | 2 |
| <i>circTASP1</i> | miR-6854-5p               | 2 |
| <i>circTASP1</i> | miR-6868-5p               | 2 |
| <i>circTASP1</i> | miR-6869-5p               | 1 |
| <i>circTASP1</i> | miR-6874-5p               | 3 |
| <i>circTASP1</i> | miR-6878-3p               | 1 |
| <i>circTASP1</i> | miR-6878-5p               | 1 |
| <i>circTASP1</i> | miR-6880-5p               | 1 |
| <i>circTASP1</i> | miR-7-3p                  | 1 |
| <i>circTASP1</i> | miR-708-3p                | 1 |
| <i>circTASP1</i> | miR-7108-5p               | 2 |
| <i>circTASP1</i> | miR-7114-5p               | 1 |
| <i>circTASP1</i> | miR-7150                  | 2 |
| <i>circTASP1</i> | miR-744-3p                | 1 |
| <i>circTASP1</i> | miR-7515                  | 3 |
| <i>circTASP1</i> | miR-762/4492/4498/5001-5p | 2 |
| <i>circTASP1</i> | miR-766-3p                | 1 |
| <i>circTASP1</i> | miR-767-3p                | 2 |
| <i>circTASP1</i> | miR-7844-5p               | 1 |
| <i>circTASP1</i> | miR-7847-3p               | 1 |
| <i>circTASP1</i> | miR-7850-5p               | 2 |
| <i>circTASP1</i> | miR-8071                  | 1 |
| <i>circTASP1</i> | miR-8084                  | 2 |
| <i>circTASP1</i> | miR-873-5p.2              | 2 |
| <i>circTASP1</i> | miR-875-5p                | 1 |
| <i>circTASP1</i> | miR-891b                  | 1 |
| <i>circTASP1</i> | miR-892-5p                | 1 |

|                  |                     |   |
|------------------|---------------------|---|
| <i>circTASP1</i> | miR-892b            | 1 |
| <i>circTASP1</i> | miR-9-5p            | 1 |
| <i>circTASP1</i> | miR-93-3p           | 4 |
| <i>circTASP1</i> | miR-939-5p/1343-5p  | 1 |
| <i>circTASP1</i> | miR-9500            | 1 |
| <i>circTASP1</i> | miR-1245b-3p        | 1 |
| <i>circTASP1</i> | miR-1252-5p         | 1 |
| <i>circTASP1</i> | miR-1253            | 2 |
| <i>circTASP1</i> | miR-1270            | 1 |
| <i>circTASP1</i> | miR-139-5p          | 1 |
| <i>circTASP1</i> | miR-1470            | 1 |
| <i>circTASP1</i> | miR-199-3p          | 1 |
| <i>circTASP1</i> | miR-208-5p          | 1 |
| <i>circTASP1</i> | miR-2114-3p         | 1 |
| <i>circTASP1</i> | miR-2276-5p         | 1 |
| <i>circTASP1</i> | miR-26-5p           | 1 |
| <i>circTASP1</i> | miR-2681-3p         | 2 |
| <i>circTASP1</i> | miR-28-5p/708-5p    | 1 |
| <i>circTASP1</i> | miR-3140-3p         | 1 |
| <i>circTASP1</i> | miR-3154            | 2 |
| <i>circTASP1</i> | miR-3157-3p         | 1 |
| <i>circTASP1</i> | miR-3173-3p/6891-5p | 1 |
| <i>circTASP1</i> | miR-3174            | 1 |
| <i>circTASP1</i> | miR-34-5p/449-5p    | 1 |
| <i>circTASP1</i> | miR-3688-3p         | 2 |
| <i>circTASP1</i> | miR-383-5p.2        | 1 |
| <i>circTASP1</i> | miR-3928-5p/6806-3p | 1 |
| <i>circTASP1</i> | miR-3935            | 1 |
| <i>circTASP1</i> | miR-411-5p.1        | 1 |
| <i>circTASP1</i> | miR-4290            | 1 |
| <i>circTASP1</i> | miR-4428            | 1 |
| <i>circTASP1</i> | miR-4434/4516/5703  | 1 |
| <i>circTASP1</i> | miR-4531            | 1 |
| <i>circTASP1</i> | miR-4667-3p         | 1 |
| <i>circTASP1</i> | miR-4703-3p         | 1 |
| <i>circTASP1</i> | miR-4705            | 1 |
| <i>circTASP1</i> | miR-490-5p          | 1 |
| <i>circTASP1</i> | miR-5193            | 1 |

|                  |                     |   |
|------------------|---------------------|---|
| <i>circTASP1</i> | miR-548au-3p        | 1 |
| <i>circTASP1</i> | miR-5694            | 1 |
| <i>circTASP1</i> | miR-580-3p          | 1 |
| <i>circTASP1</i> | miR-641/3617-5p     | 1 |
| <i>circTASP1</i> | miR-6505-5p         | 1 |
| <i>circTASP1</i> | miR-6513-3p         | 1 |
| <i>circTASP1</i> | miR-660-3p          | 1 |
| <i>circTASP1</i> | miR-6770-5p         | 2 |
| <i>circTASP1</i> | miR-6892-3p         | 1 |
| <i>circTASP1</i> | miR-7848-3p         | 1 |
| <i>circTASP1</i> | miR-874-3p          | 1 |
| <i>circTASP1</i> | miR-936             | 1 |
| <i>circTASP1</i> | miR-96-3p           | 2 |
| <i>circTASP1</i> | miR-100-3p          | 1 |
| <i>circTASP1</i> | miR-105-5p          | 1 |
| <i>circTASP1</i> | miR-1202/3972       | 1 |
| <i>circTASP1</i> | miR-1238-3p         | 1 |
| <i>circTASP1</i> | miR-1238-5p/4758-5p | 1 |
| <i>circTASP1</i> | miR-1258            | 1 |
| <i>circTASP1</i> | miR-1273d           | 1 |
| <i>circTASP1</i> | miR-1295b-5p/1912   | 1 |
| <i>circTASP1</i> | miR-1307-3p         | 1 |
| <i>circTASP1</i> | miR-140-3p.2        | 1 |
| <i>circTASP1</i> | miR-15b-3p          | 1 |
| <i>circTASP1</i> | miR-185-3p          | 1 |
| <i>circTASP1</i> | miR-192-3p          | 1 |
| <i>circTASP1</i> | miR-2681-5p         | 1 |
| <i>circTASP1</i> | miR-302a-5p         | 1 |
| <i>circTASP1</i> | miR-3064-3p         | 1 |
| <i>circTASP1</i> | miR-31-5p           | 1 |
| <i>circTASP1</i> | miR-3130-5p/4482-5p | 1 |
| <i>circTASP1</i> | miR-3134            | 1 |
| <i>circTASP1</i> | miR-3143            | 1 |
| <i>circTASP1</i> | miR-3148            | 1 |
| <i>circTASP1</i> | miR-3194-5p         | 1 |
| <i>circTASP1</i> | miR-338-3p          | 1 |
| <i>circTASP1</i> | miR-3611            | 1 |
| <i>circTASP1</i> | miR-3615            | 1 |

|                  |                                              |   |
|------------------|----------------------------------------------|---|
| <i>circTASP1</i> | miR-362-5p/500b-5p                           | 1 |
| <i>circTASP1</i> | miR-3652/4430                                | 1 |
| <i>circTASP1</i> | miR-3659                                     | 1 |
| <i>circTASP1</i> | miR-3690                                     | 1 |
| <i>circTASP1</i> | miR-378j/6839-5p                             | 1 |
| <i>circTASP1</i> | miR-3978                                     | 1 |
| <i>circTASP1</i> | miR-4254                                     | 1 |
| <i>circTASP1</i> | miR-4274                                     | 1 |
| <i>circTASP1</i> | miR-4279                                     | 1 |
| <i>circTASP1</i> | miR-4287/4685-3p                             | 1 |
| <i>circTASP1</i> | miR-4292/6791-5p                             | 1 |
| <i>circTASP1</i> | miR-4308                                     | 1 |
| <i>circTASP1</i> | miR-4310/7157-5p                             | 1 |
| <i>circTASP1</i> | miR-433-3p                                   | 1 |
| <i>circTASP1</i> | miR-4423-5p                                  | 1 |
| <i>circTASP1</i> | miR-4436b-3p/4632-5p/6735-5p/6879-5p/7843-5p | 1 |
| <i>circTASP1</i> | miR-4457                                     | 1 |
| <i>circTASP1</i> | miR-4461                                     | 1 |
| <i>circTASP1</i> | miR-4468                                     | 1 |
| <i>circTASP1</i> | miR-4469                                     | 1 |
| <i>circTASP1</i> | miR-4494                                     | 1 |
| <i>circTASP1</i> | miR-4501                                     | 1 |
| <i>circTASP1</i> | miR-4505/5787                                | 1 |
| <i>circTASP1</i> | miR-4506                                     | 1 |
| <i>circTASP1</i> | miR-450b-3p/769-3p                           | 1 |
| <i>circTASP1</i> | miR-4511                                     | 1 |
| <i>circTASP1</i> | miR-4519                                     | 1 |
| <i>circTASP1</i> | miR-4522                                     | 1 |
| <i>circTASP1</i> | miR-4530                                     | 1 |
| <i>circTASP1</i> | miR-4534/8082                                | 1 |
| <i>circTASP1</i> | miR-454-5p                                   | 1 |
| <i>circTASP1</i> | miR-4638-5p                                  | 1 |
| <i>circTASP1</i> | miR-4658/6790-5p                             | 1 |
| <i>circTASP1</i> | miR-4668-3p                                  | 1 |
| <i>circTASP1</i> | miR-4691-5p/6792-3p                          | 1 |
| <i>circTASP1</i> | miR-4709-5p                                  | 1 |
| <i>circTASP1</i> | miR-4713-3p                                  | 1 |
| <i>circTASP1</i> | miR-4761-3p                                  | 2 |

|                  |                             |   |
|------------------|-----------------------------|---|
| <i>circTASP1</i> | miR-4776-3p                 | 1 |
| <i>circTASP1</i> | miR-4790-3p                 | 1 |
| <i>circTASP1</i> | miR-4799-5p                 | 1 |
| <i>circTASP1</i> | miR-499a-3p/499b-3p         | 1 |
| <i>circTASP1</i> | miR-499b-5p                 | 1 |
| <i>circTASP1</i> | miR-5006-5p                 | 1 |
| <i>circTASP1</i> | miR-500a-5p                 | 1 |
| <i>circTASP1</i> | miR-501-5p                  | 1 |
| <i>circTASP1</i> | miR-5089-5p                 | 1 |
| <i>circTASP1</i> | miR-513a-3p/513c-3p/3606-3p | 1 |
| <i>circTASP1</i> | miR-5189-3p                 | 1 |
| <i>circTASP1</i> | miR-524-5p                  | 1 |
| <i>circTASP1</i> | miR-548b-3p                 | 1 |
| <i>circTASP1</i> | miR-5700                    | 1 |
| <i>circTASP1</i> | miR-574-5p                  | 1 |
| <i>circTASP1</i> | miR-590-3p                  | 2 |
| <i>circTASP1</i> | miR-605-5p                  | 1 |
| <i>circTASP1</i> | miR-6081                    | 1 |
| <i>circTASP1</i> | miR-6124                    | 1 |
| <i>circTASP1</i> | miR-6126                    | 1 |
| <i>circTASP1</i> | miR-622                     | 1 |
| <i>circTASP1</i> | miR-629-3p                  | 1 |
| <i>circTASP1</i> | miR-638                     | 1 |
| <i>circTASP1</i> | miR-648                     | 2 |
| <i>circTASP1</i> | miR-6501-5p                 | 1 |
| <i>circTASP1</i> | miR-6507-5p                 | 1 |
| <i>circTASP1</i> | miR-6509-5p                 | 1 |
| <i>circTASP1</i> | miR-6511-5p                 | 1 |
| <i>circTASP1</i> | miR-656-5p                  | 1 |
| <i>circTASP1</i> | miR-670-3p                  | 1 |
| <i>circTASP1</i> | miR-670-5p                  | 1 |
| <i>circTASP1</i> | miR-6728-5p                 | 1 |
| <i>circTASP1</i> | miR-6749-3p                 | 1 |
| <i>circTASP1</i> | miR-6796-3p                 | 1 |
| <i>circTASP1</i> | miR-6800-5p                 | 2 |
| <i>circTASP1</i> | miR-6802-5p                 | 2 |
| <i>circTASP1</i> | miR-6809-5p                 | 1 |
| <i>circTASP1</i> | miR-6864-5p                 | 1 |



|                  |               |   |
|------------------|---------------|---|
| <i>circTASP1</i> | miR-6871-5p   | 1 |
| <i>circTASP1</i> | miR-7113-3p   | 1 |
| <i>circTASP1</i> | miR-7154-5p   | 1 |
| <i>circTASP1</i> | miR-8070      | 1 |
| <i>circTASP1</i> | miR-8081      | 1 |
| <i>circTASP1</i> | miR-8088      | 1 |
| <i>circTASP1</i> | miR-873-5p.1  | 1 |
| <i>circTASP1</i> | miR-99-3p     | 1 |
| <i>circTASP1</i> | miR-146-5p    | 1 |
| <i>circTASP1</i> | miR-5003-3p   | 1 |
| <i>circTASP1</i> | miR-589-5p    | 1 |
| <i>circTASP1</i> | miR-1185-5p   | 1 |
| <i>circTASP1</i> | miR-1200      | 1 |
| <i>circTASP1</i> | miR-1224-5p   | 1 |
| <i>circTASP1</i> | miR-1294      | 1 |
| <i>circTASP1</i> | miR-1305      | 1 |
| <i>circTASP1</i> | miR-133a-3p.1 | 1 |
| <i>circTASP1</i> | miR-135b-3p   | 1 |
| <i>circTASP1</i> | miR-142-3p.2  | 1 |
| <i>circTASP1</i> | miR-145-3p    | 1 |
| <i>circTASP1</i> | miR-183-3p    | 1 |
| <i>circTASP1</i> | miR-297       | 1 |
| <i>circTASP1</i> | miR-3074-5p   | 1 |
| <i>circTASP1</i> | miR-3140-5p   | 1 |
| <i>circTASP1</i> | miR-32-3p     | 1 |
| <i>circTASP1</i> | miR-335-3p    | 1 |
| <i>circTASP1</i> | miR-345-3p    | 1 |
| <i>circTASP1</i> | miR-3605-5p   | 1 |
| <i>circTASP1</i> | miR-3613-3p   | 1 |
| <i>circTASP1</i> | miR-3668      | 1 |
| <i>circTASP1</i> | miR-378a-5p   | 1 |
| <i>circTASP1</i> | miR-380-3p    | 1 |
| <i>circTASP1</i> | miR-3915      | 1 |
| <i>circTASP1</i> | miR-4316      | 1 |
| <i>circTASP1</i> | miR-4427      | 1 |
| <i>circTASP1</i> | miR-4452      | 1 |
| <i>circTASP1</i> | miR-4666a-5p  | 1 |
| <i>circTASP1</i> | miR-4680-3p   | 1 |

|                    |                                                                  |   |
|--------------------|------------------------------------------------------------------|---|
| <i>circTASP1</i>   | miR-4689/6858-5p                                                 | 1 |
| <i>circTASP1</i>   | miR-5187-3p                                                      | 1 |
| <i>circTASP1</i>   | miR-548ac/548bb-3p/548d-3p/548h-3p/548z                          |   |
| <i>circTASP1</i>   | miR-548aq-3p/548am-3p/548aj-3p/548ah-3p/548ae-3p/548j-3p/548x-3p |   |
| <i>circTASP1</i>   | miR-548g-3p                                                      | 1 |
| <i>circTASP1</i>   | miR-552-5p                                                       | 1 |
| <i>circTASP1</i>   | miR-5571-5p                                                      | 1 |
| <i>circTASP1</i>   | miR-584-5p                                                       | 1 |
| <i>circTASP1</i>   | miR-607                                                          | 1 |
| <i>circTASP1</i>   | miR-6080                                                         | 1 |
| <i>circTASP1</i>   | miR-627-3p                                                       | 1 |
| <i>circTASP1</i>   | miR-675-3p                                                       | 1 |
| <i>circTASP1</i>   | miR-7152-5p                                                      | 1 |
| <i>circTASP1</i>   | miR-7849-3p                                                      | 1 |
| <i>circTASP1</i>   | miR-7852-3p                                                      | 1 |
| <i>circTASP1</i>   | miR-125-5p                                                       | 1 |
| <i>circTASP1</i>   | miR-3920                                                         | 1 |
| <i>circTASP1</i>   | miR-4732-3p                                                      | 1 |
| <i>circTBC1D12</i> | miR-1249-5p/6797-5p                                              | 1 |
| <i>circTBC1D12</i> | miR-1251-5p                                                      | 1 |
| <i>circTBC1D12</i> | miR-2355-3p                                                      | 1 |
| <i>circTBC1D12</i> | miR-2392                                                         | 1 |
| <i>circTBC1D12</i> | miR-28-5p/708-5p                                                 | 1 |
| <i>circTBC1D12</i> | miR-29a-5p                                                       | 2 |
| <i>circTBC1D12</i> | miR-3121-5p                                                      | 1 |
| <i>circTBC1D12</i> | miR-3126-5p                                                      | 1 |
| <i>circTBC1D12</i> | miR-3199/8052                                                    | 1 |
| <i>circTBC1D12</i> | miR-365a-5p/365b-5p                                              | 1 |
| <i>circTBC1D12</i> | miR-3663-3p                                                      | 1 |
| <i>circTBC1D12</i> | miR-3692-5p                                                      | 1 |
| <i>circTBC1D12</i> | miR-3920                                                         | 1 |
| <i>circTBC1D12</i> | miR-4266                                                         | 1 |
| <i>circTBC1D12</i> | miR-4307                                                         | 1 |
| <i>circTBC1D12</i> | miR-432-3p                                                       | 1 |
| <i>circTBC1D12</i> | miR-4326                                                         | 1 |
| <i>circTBC1D12</i> | miR-4419a/4510/6127/6129/6130/6133                               | 1 |
| <i>circTBC1D12</i> | miR-4427                                                         | 1 |
| <i>circTBC1D12</i> | miR-4433a-3p                                                     | 1 |

|                    |                     |   |
|--------------------|---------------------|---|
| <i>circTBC1D12</i> | miR-4459            | 1 |
| <i>circTBC1D12</i> | miR-4520-3p         | 1 |
| <i>circTBC1D12</i> | miR-4646-3p         | 1 |
| <i>circTBC1D12</i> | miR-4680-3p         | 1 |
| <i>circTBC1D12</i> | miR-4684-5p         | 1 |
| <i>circTBC1D12</i> | miR-4695-5p         | 1 |
| <i>circTBC1D12</i> | miR-4699-5p         | 1 |
| <i>circTBC1D12</i> | miR-4709-3p         | 2 |
| <i>circTBC1D12</i> | miR-4762-3p         | 1 |
| <i>circTBC1D12</i> | miR-4764-5p         | 1 |
| <i>circTBC1D12</i> | miR-4768-3p         | 1 |
| <i>circTBC1D12</i> | miR-4768-5p/6833-3p | 1 |
| <i>circTBC1D12</i> | miR-4775            | 1 |
| <i>circTBC1D12</i> | miR-4779            | 1 |
| <i>circTBC1D12</i> | miR-5004-3p         | 1 |
| <i>circTBC1D12</i> | miR-517-5p          | 1 |
| <i>circTBC1D12</i> | miR-5187-3p         | 1 |
| <i>circTBC1D12</i> | miR-549a            | 1 |
| <i>circTBC1D12</i> | miR-5692a           | 1 |
| <i>circTBC1D12</i> | miR-580-5p          | 1 |
| <i>circTBC1D12</i> | miR-6081            | 1 |
| <i>circTBC1D12</i> | miR-628-5p          | 1 |
| <i>circTBC1D12</i> | miR-6753-5p         | 1 |
| <i>circTBC1D12</i> | miR-676-3p          | 1 |
| <i>circTBC1D12</i> | miR-6809-3p         | 1 |
| <i>circTBC1D12</i> | miR-6817-3p         | 1 |
| <i>circTBC1D12</i> | miR-6873-3p         | 1 |
| <i>circTBC1D12</i> | miR-7110-3p         | 1 |
| <i>circTBC1D12</i> | miR-7845-5p         | 1 |
| <i>circTBC1D12</i> | miR-7850-5p         | 1 |
| <i>circTBC1D12</i> | miR-8055            | 1 |
| <i>circTBC1D12</i> | miR-8081            | 1 |
| <i>circTBC1D12</i> | miR-93-3p           | 1 |
| <i>circTBC1D12</i> | miR-942-5p          | 1 |
| <i>circTBC1D12</i> | miR-124-3p.1        | 1 |
| <i>circTBC1D12</i> | miR-1273g-5p        | 1 |
| <i>circTBC1D12</i> | miR-1279            | 1 |
| <i>circTBC1D12</i> | miR-140-5p          | 1 |

|                    |                           |   |
|--------------------|---------------------------|---|
| <i>circTBC1D12</i> | miR-145-3p                | 1 |
| <i>circTBC1D12</i> | miR-15b-3p                | 1 |
| <i>circTBC1D12</i> | miR-1910-3p/6511a-5p      | 1 |
| <i>circTBC1D12</i> | miR-194-3p                | 1 |
| <i>circTBC1D12</i> | miR-203a-5p               | 1 |
| <i>circTBC1D12</i> | miR-203b-5p/6718-5p       | 1 |
| <i>circTBC1D12</i> | miR-24-3p                 | 1 |
| <i>circTBC1D12</i> | miR-299-5p                | 1 |
| <i>circTBC1D12</i> | miR-29b-1-5p              | 1 |
| <i>circTBC1D12</i> | miR-29b-2-5p              | 1 |
| <i>circTBC1D12</i> | miR-3074-5p               | 1 |
| <i>circTBC1D12</i> | miR-3193                  | 1 |
| <i>circTBC1D12</i> | miR-323a-5p               | 2 |
| <i>circTBC1D12</i> | miR-34-5p/449-5p          | 1 |
| <i>circTBC1D12</i> | miR-34b-5p/449c-5p        | 1 |
| <i>circTBC1D12</i> | miR-3671                  | 1 |
| <i>circTBC1D12</i> | miR-370-3p                | 1 |
| <i>circTBC1D12</i> | miR-371-5p                | 1 |
| <i>circTBC1D12</i> | miR-3714                  | 1 |
| <i>circTBC1D12</i> | miR-371b-5p/373-5p/616-5p | 1 |
| <i>circTBC1D12</i> | miR-372-5p                | 1 |
| <i>circTBC1D12</i> | miR-379-5p                | 1 |
| <i>circTBC1D12</i> | miR-3909                  | 1 |
| <i>circTBC1D12</i> | miR-3910                  | 1 |
| <i>circTBC1D12</i> | miR-3922-5p               | 1 |
| <i>circTBC1D12</i> | miR-3977                  | 1 |
| <i>circTBC1D12</i> | miR-412-5p                | 1 |
| <i>circTBC1D12</i> | miR-4272                  | 1 |
| <i>circTBC1D12</i> | miR-4282                  | 1 |
| <i>circTBC1D12</i> | miR-4284                  | 1 |
| <i>circTBC1D12</i> | miR-431-5p                | 1 |
| <i>circTBC1D12</i> | miR-4432                  | 1 |
| <i>circTBC1D12</i> | miR-4451                  | 1 |
| <i>circTBC1D12</i> | miR-4463                  | 1 |
| <i>circTBC1D12</i> | miR-4499                  | 1 |
| <i>circTBC1D12</i> | miR-4513/6855-3p          | 1 |
| <i>circTBC1D12</i> | miR-4536-5p               | 1 |
| <i>circTBC1D12</i> | miR-4635                  | 1 |

|                    |                         |   |
|--------------------|-------------------------|---|
| <i>circTBC1D12</i> | miR-4649-3p             | 1 |
| <i>circTBC1D12</i> | miR-4650-3p             | 1 |
| <i>circTBC1D12</i> | miR-4691-5p/6792-3p     | 1 |
| <i>circTBC1D12</i> | miR-4698                | 1 |
| <i>circTBC1D12</i> | miR-4760-3p             | 1 |
| <i>circTBC1D12</i> | miR-5007-3p             | 1 |
| <i>circTBC1D12</i> | miR-5095/7151-3p        | 1 |
| <i>circTBC1D12</i> | miR-517-3p              | 1 |
| <i>circTBC1D12</i> | miR-518-3p              | 1 |
| <i>circTBC1D12</i> | miR-526b-5p             | 1 |
| <i>circTBC1D12</i> | miR-548au-3p            | 1 |
| <i>circTBC1D12</i> | miR-552-3p              | 1 |
| <i>circTBC1D12</i> | miR-5571-5p             | 1 |
| <i>circTBC1D12</i> | miR-561-5p              | 1 |
| <i>circTBC1D12</i> | miR-5693                | 1 |
| <i>circTBC1D12</i> | miR-578                 | 1 |
| <i>circTBC1D12</i> | miR-607                 | 1 |
| <i>circTBC1D12</i> | miR-6074                | 1 |
| <i>circTBC1D12</i> | miR-6134                | 1 |
| <i>circTBC1D12</i> | miR-636                 | 1 |
| <i>circTBC1D12</i> | miR-6499-3p             | 1 |
| <i>circTBC1D12</i> | miR-6507-5p             | 1 |
| <i>circTBC1D12</i> | miR-6741-3p             | 1 |
| <i>circTBC1D12</i> | miR-6749-3p             | 1 |
| <i>circTBC1D12</i> | miR-6763-3p             | 1 |
| <i>circTBC1D12</i> | miR-6815-5p/6865-5p     | 1 |
| <i>circTBC1D12</i> | miR-6857-3p             | 1 |
| <i>circTBC1D12</i> | miR-7152-5p             | 1 |
| <i>circTBC1D12</i> | miR-7158-5p             | 1 |
| <i>circTBC1D12</i> | miR-7162-3p             | 1 |
| <i>circTBC1D12</i> | miR-7854-3p             | 1 |
| <i>circTBC1D12</i> | miR-8063                | 1 |
| <i>circTBC1D12</i> | miR-8069                | 1 |
| <i>circTBC1D12</i> | miR-8087                | 1 |
| <i>circTBC1D12</i> | miR-876-3p              | 2 |
| <i>circTBC1D12</i> | miR-877-3p              | 1 |
| <i>circTBC1D12</i> | miR-940/6808-5p/6893-5p | 1 |
| <i>circTERF2</i>   | miR-1200                | 2 |

|                  |                       |   |
|------------------|-----------------------|---|
| <i>circTERF2</i> | miR-1233-3p           | 1 |
| <i>circTERF2</i> | miR-1252-3p           | 2 |
| <i>circTERF2</i> | miR-1255a/1255b-5p    | 1 |
| <i>circTERF2</i> | miR-126-5p            | 3 |
| <i>circTERF2</i> | miR-1266-3p           | 2 |
| <i>circTERF2</i> | miR-1270              | 1 |
| <i>circTERF2</i> | miR-129-3p            | 1 |
| <i>circTERF2</i> | miR-1306-5p           | 1 |
| <i>circTERF2</i> | miR-1343-3p           | 1 |
| <i>circTERF2</i> | miR-145-3p            | 1 |
| <i>circTERF2</i> | miR-185-5p            | 1 |
| <i>circTERF2</i> | miR-186-5p            | 3 |
| <i>circTERF2</i> | miR-18b-3p            | 1 |
| <i>circTERF2</i> | miR-191-3p            | 1 |
| <i>circTERF2</i> | miR-1976              | 2 |
| <i>circTERF2</i> | miR-203a-3p.1         | 2 |
| <i>circTERF2</i> | miR-2115-5p           | 1 |
| <i>circTERF2</i> | miR-214-3p/3619-5p    | 2 |
| <i>circTERF2</i> | miR-215-3p            | 1 |
| <i>circTERF2</i> | miR-2392              | 1 |
| <i>circTERF2</i> | miR-298               | 2 |
| <i>circTERF2</i> | miR-29b-1-5p          | 2 |
| <i>circTERF2</i> | miR-3074-5p           | 1 |
| <i>circTERF2</i> | miR-3133              | 3 |
| <i>circTERF2</i> | miR-3136-3p/7155-3p   | 2 |
| <i>circTERF2</i> | miR-3140-5p           | 2 |
| <i>circTERF2</i> | miR-3149              | 1 |
| <i>circTERF2</i> | miR-3162-3p           | 1 |
| <i>circTERF2</i> | miR-3180-5p           | 2 |
| <i>circTERF2</i> | miR-320e              | 2 |
| <i>circTERF2</i> | miR-328-3p            | 2 |
| <i>circTERF2</i> | miR-335-3p            | 2 |
| <i>circTERF2</i> | miR-338-3p            | 2 |
| <i>circTERF2</i> | miR-345-3p            | 2 |
| <i>circTERF2</i> | miR-3613-3p           | 2 |
| <i>circTERF2</i> | miR-3622a-3p/3622b-3p | 1 |
| <i>circTERF2</i> | miR-3646              | 2 |
| <i>circTERF2</i> | miR-3653-5p           | 2 |

|                  |                     |   |
|------------------|---------------------|---|
| <i>circTERF2</i> | miR-3667-3p         | 2 |
| <i>circTERF2</i> | miR-3672/6864-3p    | 2 |
| <i>circTERF2</i> | miR-3690            | 2 |
| <i>circTERF2</i> | miR-378a-5p         | 2 |
| <i>circTERF2</i> | miR-378j/6839-5p    | 1 |
| <i>circTERF2</i> | miR-3912-5p         | 1 |
| <i>circTERF2</i> | miR-3928-5p/6806-3p | 1 |
| <i>circTERF2</i> | miR-4251            | 2 |
| <i>circTERF2</i> | miR-4254            | 2 |
| <i>circTERF2</i> | miR-4279            | 2 |
| <i>circTERF2</i> | miR-4282            | 1 |
| <i>circTERF2</i> | miR-4286            | 1 |
| <i>circTERF2</i> | miR-432-3p          | 1 |
| <i>circTERF2</i> | miR-4329            | 2 |
| <i>circTERF2</i> | miR-4330            | 1 |
| <i>circTERF2</i> | miR-4426/4647/4662b | 2 |
| <i>circTERF2</i> | miR-4427            | 2 |
| <i>circTERF2</i> | miR-4484            | 1 |
| <i>circTERF2</i> | miR-4511            | 2 |
| <i>circTERF2</i> | miR-4528            | 1 |
| <i>circTERF2</i> | miR-4530            | 2 |
| <i>circTERF2</i> | miR-4531            | 1 |
| <i>circTERF2</i> | miR-4641            | 2 |
| <i>circTERF2</i> | miR-4663            | 2 |
| <i>circTERF2</i> | miR-4680-3p         | 2 |
| <i>circTERF2</i> | miR-4687-5p         | 1 |
| <i>circTERF2</i> | miR-4695-3p         | 2 |
| <i>circTERF2</i> | miR-4699-5p         | 2 |
| <i>circTERF2</i> | miR-4712-3p         | 2 |
| <i>circTERF2</i> | miR-4728-3p         | 1 |
| <i>circTERF2</i> | miR-4757-3p         | 1 |
| <i>circTERF2</i> | miR-4777-3p         | 1 |
| <i>circTERF2</i> | miR-4786-5p         | 2 |
| <i>circTERF2</i> | miR-4793-5p         | 2 |
| <i>circTERF2</i> | miR-4795-3p         | 2 |
| <i>circTERF2</i> | miR-4803            | 1 |
| <i>circTERF2</i> | miR-495-3p          | 1 |
| <i>circTERF2</i> | miR-5003-3p         | 2 |

|                  |                                                                  |   |
|------------------|------------------------------------------------------------------|---|
| <i>circTERF2</i> | miR-5003-5p                                                      | 1 |
| <i>circTERF2</i> | miR-5007-3p                                                      | 2 |
| <i>circTERF2</i> | miR-510-3p                                                       | 2 |
| <i>circTERF2</i> | miR-512-5p                                                       | 1 |
| <i>circTERF2</i> | miR-513a-3p/513c-3p/3606-3p                                      | 1 |
| <i>circTERF2</i> | miR-516a-3p/516b-3p/7162-5p                                      | 1 |
| <i>circTERF2</i> | miR-5187-3p                                                      | 2 |
| <i>circTERF2</i> | miR-5192                                                         | 1 |
| <i>circTERF2</i> | miR-5193                                                         | 1 |
| <i>circTERF2</i> | miR-5196-3p                                                      | 2 |
| <i>circTERF2</i> | miR-5197-3p                                                      | 2 |
| <i>circTERF2</i> | miR-525-5p                                                       | 2 |
| <i>circTERF2</i> | miR-539-5p                                                       | 4 |
| <i>circTERF2</i> | miR-548ac/548bb-3p/548d-3p/548h-3p/548z                          | 2 |
| <i>circTERF2</i> | miR-548an                                                        | 1 |
| <i>circTERF2</i> | miR-548aq-3p/548am-3p/548aj-3p/548ak-3p/548ae-3p/548j-3p/548x-3p | 2 |
| <i>circTERF2</i> | miR-548b-3p                                                      | 2 |
| <i>circTERF2</i> | miR-548c-3p                                                      | 1 |
| <i>circTERF2</i> | miR-548g-3p                                                      | 2 |
| <i>circTERF2</i> | miR-5580-3p                                                      | 1 |
| <i>circTERF2</i> | miR-5585-3p                                                      | 2 |
| <i>circTERF2</i> | miR-5586-5p                                                      | 2 |
| <i>circTERF2</i> | miR-5680                                                         | 2 |
| <i>circTERF2</i> | miR-580-3p                                                       | 2 |
| <i>circTERF2</i> | miR-580-5p                                                       | 2 |
| <i>circTERF2</i> | miR-589-3p                                                       | 2 |
| <i>circTERF2</i> | miR-590-3p                                                       | 1 |
| <i>circTERF2</i> | miR-607                                                          | 1 |
| <i>circTERF2</i> | miR-615-3p                                                       | 1 |
| <i>circTERF2</i> | miR-616-3p                                                       | 1 |
| <i>circTERF2</i> | miR-619-3p                                                       | 1 |
| <i>circTERF2</i> | miR-626/6876-3p                                                  | 1 |
| <i>circTERF2</i> | miR-627-3p                                                       | 2 |
| <i>circTERF2</i> | miR-6507-5p                                                      | 1 |
| <i>circTERF2</i> | miR-656-3p                                                       | 2 |
| <i>circTERF2</i> | miR-660-3p                                                       | 1 |
| <i>circTERF2</i> | miR-6720-5p                                                      | 2 |
| <i>circTERF2</i> | miR-6734-3p                                                      | 2 |



|                     |                                      |   |
|---------------------|--------------------------------------|---|
| <i>circTERF2</i>    | miR-6744-5p                          | 1 |
| <i>circTERF2</i>    | miR-6750-3p                          | 1 |
| <i>circTERF2</i>    | miR-6759-3p                          | 2 |
| <i>circTERF2</i>    | miR-6761-5p                          | 2 |
| <i>circTERF2</i>    | miR-6765-3p                          | 1 |
| <i>circTERF2</i>    | miR-6768-3p                          | 1 |
| <i>circTERF2</i>    | miR-6773-3p                          | 1 |
| <i>circTERF2</i>    | miR-6779-3p                          | 1 |
| <i>circTERF2</i>    | miR-6786-3p                          | 1 |
| <i>circTERF2</i>    | miR-6815-3p                          | 1 |
| <i>circTERF2</i>    | miR-6834-3p                          | 1 |
| <i>circTERF2</i>    | miR-6846-3p                          | 1 |
| <i>circTERF2</i>    | miR-6859-3p                          | 1 |
| <i>circTERF2</i>    | miR-7152-5p                          | 1 |
| <i>circTERF2</i>    | miR-7160-5p                          | 2 |
| <i>circTERF2</i>    | miR-7641                             | 2 |
| <i>circTERF2</i>    | miR-769-5p                           | 2 |
| <i>circTERF2</i>    | miR-7851-3p                          | 1 |
| <i>circTERF2</i>    | miR-8077                             | 2 |
| <i>circTERF2</i>    | miR-875-5p                           | 1 |
| <i>circTERF2</i>    | miR-890                              | 2 |
| <i>circTERF2</i>    | miR-922                              | 2 |
| <i>circTMEM132D</i> | miR-1207-3p                          | 2 |
| <i>circTMEM132D</i> | miR-1226-3p                          | 1 |
| <i>circTMEM132D</i> | miR-1243                             | 1 |
| <i>circTMEM132D</i> | miR-1282                             | 1 |
| <i>circTMEM132D</i> | miR-129-3p                           | 1 |
| <i>circTMEM132D</i> | miR-136-3p                           | 2 |
| <i>circTMEM132D</i> | miR-1469                             | 1 |
| <i>circTMEM132D</i> | miR-15-5p/16-5p/195-5p/424-5p/497-5p | 2 |
| <i>circTMEM132D</i> | miR-18-5p                            | 1 |
| <i>circTMEM132D</i> | miR-214-3p/3619-5p                   | 1 |
| <i>circTMEM132D</i> | miR-215-3p                           | 1 |
| <i>circTMEM132D</i> | miR-219b-5p                          | 1 |
| <i>circTMEM132D</i> | miR-28-5p/708-5p                     | 1 |
| <i>circTMEM132D</i> | miR-3122/3913-5p                     | 1 |
| <i>circTMEM132D</i> | miR-3173-3p/6891-5p                  | 2 |
| <i>circTMEM132D</i> | miR-3177-3p                          | 1 |

|                     |                                                                  |   |
|---------------------|------------------------------------------------------------------|---|
| <i>circTMEM132D</i> | miR-3185                                                         | 2 |
| <i>circTMEM132D</i> | miR-3186-5p                                                      | 1 |
| <i>circTMEM132D</i> | miR-3194-5p                                                      | 1 |
| <i>circTMEM132D</i> | miR-330-3p.2                                                     | 1 |
| <i>circTMEM132D</i> | miR-338-3p                                                       | 1 |
| <i>circTMEM132D</i> | miR-339-3p                                                       | 1 |
| <i>circTMEM132D</i> | miR-3654                                                         | 1 |
| <i>circTMEM132D</i> | miR-3667-3p                                                      | 1 |
| <i>circTMEM132D</i> | miR-3978                                                         | 1 |
| <i>circTMEM132D</i> | miR-4267                                                         | 2 |
| <i>circTMEM132D</i> | miR-4422                                                         | 1 |
| <i>circTMEM132D</i> | miR-4428                                                         | 2 |
| <i>circTMEM132D</i> | miR-4470                                                         | 1 |
| <i>circTMEM132D</i> | miR-4484                                                         | 1 |
| <i>circTMEM132D</i> | miR-450a-1-3p                                                    | 1 |
| <i>circTMEM132D</i> | miR-450b-3p/769-3p                                               | 1 |
| <i>circTMEM132D</i> | miR-4530                                                         | 1 |
| <i>circTMEM132D</i> | miR-4660                                                         | 1 |
| <i>circTMEM132D</i> | miR-4687-5p                                                      | 1 |
| <i>circTMEM132D</i> | miR-4690-3p/5685                                                 | 1 |
| <i>circTMEM132D</i> | miR-4709-3p                                                      | 1 |
| <i>circTMEM132D</i> | miR-4733-3p                                                      | 1 |
| <i>circTMEM132D</i> | miR-4737                                                         | 1 |
| <i>circTMEM132D</i> | miR-4764-5p                                                      | 1 |
| <i>circTMEM132D</i> | miR-499a-3p/499b-3p                                              | 2 |
| <i>circTMEM132D</i> | miR-5002-5p                                                      | 1 |
| <i>circTMEM132D</i> | miR-500a-3p                                                      | 1 |
| <i>circTMEM132D</i> | miR-501-3p/502-3p                                                | 1 |
| <i>circTMEM132D</i> | miR-503-5p                                                       | 2 |
| <i>circTMEM132D</i> | miR-5088-3p                                                      | 1 |
| <i>circTMEM132D</i> | miR-5089-5p                                                      | 1 |
| <i>circTMEM132D</i> | miR-5187-5p                                                      | 1 |
| <i>circTMEM132D</i> | miR-5197-3p                                                      | 1 |
| <i>circTMEM132D</i> | miR-524-3p/525-3p                                                | 1 |
| <i>circTMEM132D</i> | miR-548an                                                        | 1 |
| <i>circTMEM132D</i> | miR-548av-5p/548k/8054                                           | 1 |
| <i>circTMEM132D</i> | miR-548ay-5p/548au-5p/548as-5p/548ar-5p/548aq-5p/548ap-5p/548am- |   |
| <i>circTMEM132D</i> | miR-548l                                                         | 1 |

|                     |                     |   |
|---------------------|---------------------|---|
| <i>circTMEM132D</i> | miR-548m            | 1 |
| <i>circTMEM132D</i> | miR-561-5p          | 1 |
| <i>circTMEM132D</i> | miR-5681a           | 1 |
| <i>circTMEM132D</i> | miR-5707            | 1 |
| <i>circTMEM132D</i> | miR-575/4676-5p     | 1 |
| <i>circTMEM132D</i> | miR-587             | 1 |
| <i>circTMEM132D</i> | miR-6128            | 1 |
| <i>circTMEM132D</i> | miR-626/6876-3p     | 1 |
| <i>circTMEM132D</i> | miR-634             | 1 |
| <i>circTMEM132D</i> | miR-646             | 2 |
| <i>circTMEM132D</i> | miR-6513-5p         | 1 |
| <i>circTMEM132D</i> | miR-6728-5p         | 1 |
| <i>circTMEM132D</i> | miR-6730-5p         | 1 |
| <i>circTMEM132D</i> | miR-6734-3p         | 1 |
| <i>circTMEM132D</i> | miR-6768-3p         | 1 |
| <i>circTMEM132D</i> | miR-6773-3p         | 1 |
| <i>circTMEM132D</i> | miR-6779-3p         | 1 |
| <i>circTMEM132D</i> | miR-6830-5p         | 1 |
| <i>circTMEM132D</i> | miR-6858-3p         | 1 |
| <i>circTMEM132D</i> | miR-6886-3p         | 1 |
| <i>circTMEM132D</i> | miR-767-5p          | 1 |
| <i>circTMEM132D</i> | miR-770-5p          | 1 |
| <i>circTMEM132D</i> | miR-8068            | 1 |
| <i>circTMEM132D</i> | miR-887-5p          | 1 |
| <i>circTMEM132D</i> | miR-922             | 1 |
| <i>circTMEM132D</i> | miR-938             | 1 |
| <i>circTMEM132D</i> | miR-1178-5p         | 1 |
| <i>circTMEM132D</i> | miR-1182            | 1 |
| <i>circTMEM132D</i> | miR-1184            | 2 |
| <i>circTMEM132D</i> | miR-1185-5p         | 1 |
| <i>circTMEM132D</i> | miR-1199-5p/6751-3p | 1 |
| <i>circTMEM132D</i> | miR-1200            | 1 |
| <i>circTMEM132D</i> | miR-1202/3972       | 1 |
| <i>circTMEM132D</i> | miR-1203            | 1 |
| <i>circTMEM132D</i> | miR-1204            | 2 |
| <i>circTMEM132D</i> | miR-1205            | 2 |
| <i>circTMEM132D</i> | miR-1224-3p         | 1 |
| <i>circTMEM132D</i> | miR-1224-5p         | 2 |

|                     |                          |   |
|---------------------|--------------------------|---|
| <i>circTMEM132D</i> | miR-1225-3p              | 1 |
| <i>circTMEM132D</i> | miR-1226-5p              | 1 |
| <i>circTMEM132D</i> | miR-1227-5p              | 1 |
| <i>circTMEM132D</i> | miR-1237-3p              | 1 |
| <i>circTMEM132D</i> | miR-1248                 | 1 |
| <i>circTMEM132D</i> | miR-1249-5p/6797-5p      | 1 |
| <i>circTMEM132D</i> | miR-125-5p               | 1 |
| <i>circTMEM132D</i> | miR-1252-5p              | 1 |
| <i>circTMEM132D</i> | miR-1253                 | 2 |
| <i>circTMEM132D</i> | miR-1264                 | 1 |
| <i>circTMEM132D</i> | miR-1266-3p              | 1 |
| <i>circTMEM132D</i> | miR-1273d                | 1 |
| <i>circTMEM132D</i> | miR-1273g-3p             | 1 |
| <i>circTMEM132D</i> | miR-1273g-5p             | 1 |
| <i>circTMEM132D</i> | miR-1273h-3p             | 1 |
| <i>circTMEM132D</i> | miR-128-3p               | 1 |
| <i>circTMEM132D</i> | miR-1287-5p              | 1 |
| <i>circTMEM132D</i> | miR-1288-3p              | 1 |
| <i>circTMEM132D</i> | miR-1289                 | 1 |
| <i>circTMEM132D</i> | miR-1290                 | 1 |
| <i>circTMEM132D</i> | miR-1293/4483            | 1 |
| <i>circTMEM132D</i> | miR-1294                 | 1 |
| <i>circTMEM132D</i> | miR-1295b-5p/1912        | 1 |
| <i>circTMEM132D</i> | miR-1299                 | 1 |
| <i>circTMEM132D</i> | miR-130-3p/301-3p/454-3p | 1 |
| <i>circTMEM132D</i> | miR-1301-5p/6502-5p      | 1 |
| <i>circTMEM132D</i> | miR-1302/4298            | 1 |
| <i>circTMEM132D</i> | miR-1306-3p              | 1 |
| <i>circTMEM132D</i> | miR-1306-5p              | 1 |
| <i>circTMEM132D</i> | miR-1307-5p              | 1 |
| <i>circTMEM132D</i> | miR-132-5p               | 2 |
| <i>circTMEM132D</i> | miR-1324                 | 1 |
| <i>circTMEM132D</i> | miR-133a-5p              | 1 |
| <i>circTMEM132D</i> | miR-136-5p               | 1 |
| <i>circTMEM132D</i> | miR-138-5p               | 1 |
| <i>circTMEM132D</i> | miR-140-3p.1             | 1 |
| <i>circTMEM132D</i> | miR-140-3p.2             | 1 |
| <i>circTMEM132D</i> | miR-140-5p               | 1 |

|                     |                                     |   |
|---------------------|-------------------------------------|---|
| <i>circTMEM132D</i> | miR-141-5p                          | 2 |
| <i>circTMEM132D</i> | miR-143-5p                          | 1 |
| <i>circTMEM132D</i> | miR-144-5p                          | 1 |
| <i>circTMEM132D</i> | miR-145-3p                          | 2 |
| <i>circTMEM132D</i> | miR-146-5p                          | 1 |
| <i>circTMEM132D</i> | miR-1470                            | 1 |
| <i>circTMEM132D</i> | miR-147b                            | 1 |
| <i>circTMEM132D</i> | miR-149-3p/4728-5p/6785-5p/6883-5p  | 1 |
| <i>circTMEM132D</i> | miR-151-5p                          | 1 |
| <i>circTMEM132D</i> | miR-152-5p                          | 1 |
| <i>circTMEM132D</i> | miR-153-5p                          | 1 |
| <i>circTMEM132D</i> | miR-1539                            | 1 |
| <i>circTMEM132D</i> | miR-155-5p                          | 1 |
| <i>circTMEM132D</i> | miR-15a-3p                          | 1 |
| <i>circTMEM132D</i> | miR-17-3p                           | 2 |
| <i>circTMEM132D</i> | miR-17-5p/20-5p/93-5p/106-5p/519-3p | 1 |
| <i>circTMEM132D</i> | miR-181a-3p                         | 1 |
| <i>circTMEM132D</i> | miR-181c-3p                         | 2 |
| <i>circTMEM132D</i> | miR-182-3p                          | 1 |
| <i>circTMEM132D</i> | miR-18a-3p                          | 1 |
| <i>circTMEM132D</i> | miR-1909-3p/6722-3p                 | 1 |
| <i>circTMEM132D</i> | miR-190a-3p                         | 1 |
| <i>circTMEM132D</i> | miR-1910-5p                         | 1 |
| <i>circTMEM132D</i> | miR-1915-3p/6764-5p                 | 2 |
| <i>circTMEM132D</i> | miR-1915-5p                         | 2 |
| <i>circTMEM132D</i> | miR-192-5p/215-5p                   | 1 |
| <i>circTMEM132D</i> | miR-193a-5p                         | 1 |
| <i>circTMEM132D</i> | miR-197-3p                          | 1 |
| <i>circTMEM132D</i> | miR-1972                            | 1 |
| <i>circTMEM132D</i> | miR-1973                            | 2 |
| <i>circTMEM132D</i> | miR-1976                            | 1 |
| <i>circTMEM132D</i> | miR-198                             | 1 |
| <i>circTMEM132D</i> | miR-202-3p                          | 1 |
| <i>circTMEM132D</i> | miR-203a-5p                         | 1 |
| <i>circTMEM132D</i> | miR-203b-5p/6718-5p                 | 1 |
| <i>circTMEM132D</i> | miR-204-3p/4646-5p                  | 1 |
| <i>circTMEM132D</i> | miR-210-3p                          | 1 |
| <i>circTMEM132D</i> | miR-2114-5p                         | 1 |

|                     |                                 |   |
|---------------------|---------------------------------|---|
| <i>circTMEM132D</i> | miR-2115-3p                     | 1 |
| <i>circTMEM132D</i> | miR-214-5p                      | 1 |
| <i>circTMEM132D</i> | miR-218-1-3p                    | 1 |
| <i>circTMEM132D</i> | miR-218-2-3p                    | 1 |
| <i>circTMEM132D</i> | miR-22-3p                       | 2 |
| <i>circTMEM132D</i> | miR-2278                        | 1 |
| <i>circTMEM132D</i> | miR-2467-3p                     | 2 |
| <i>circTMEM132D</i> | miR-2467-5p                     | 1 |
| <i>circTMEM132D</i> | miR-2681-3p                     | 2 |
| <i>circTMEM132D</i> | miR-26b-3p                      | 1 |
| <i>circTMEM132D</i> | miR-2861                        | 1 |
| <i>circTMEM132D</i> | miR-296-5p                      | 1 |
| <i>circTMEM132D</i> | miR-29a-5p                      | 1 |
| <i>circTMEM132D</i> | miR-302-3p/372-3p/373-3p/520-3p | 1 |
| <i>circTMEM132D</i> | miR-3064-5p                     | 1 |
| <i>circTMEM132D</i> | miR-3065-5p                     | 2 |
| <i>circTMEM132D</i> | miR-3074-3p                     | 1 |
| <i>circTMEM132D</i> | miR-3074-5p                     | 2 |
| <i>circTMEM132D</i> | miR-3123                        | 1 |
| <i>circTMEM132D</i> | miR-3124-3p                     | 1 |
| <i>circTMEM132D</i> | miR-3125/3916/6859-5p           | 1 |
| <i>circTMEM132D</i> | miR-3126-5p                     | 1 |
| <i>circTMEM132D</i> | miR-3127-3p/6756-3p             | 1 |
| <i>circTMEM132D</i> | miR-3127-5p                     | 1 |
| <i>circTMEM132D</i> | miR-3129-3p/5583-5p             | 1 |
| <i>circTMEM132D</i> | miR-3130-5p/4482-5p             | 1 |
| <i>circTMEM132D</i> | miR-3135b                       | 1 |
| <i>circTMEM132D</i> | miR-3136-3p/7155-3p             | 1 |
| <i>circTMEM132D</i> | miR-3138                        | 1 |
| <i>circTMEM132D</i> | miR-3140-5p                     | 1 |
| <i>circTMEM132D</i> | miR-3144-3p                     | 1 |
| <i>circTMEM132D</i> | miR-3144-5p                     | 3 |
| <i>circTMEM132D</i> | miR-3145-5p                     | 1 |
| <i>circTMEM132D</i> | miR-3146                        | 1 |
| <i>circTMEM132D</i> | miR-3150b-3p                    | 2 |
| <i>circTMEM132D</i> | miR-3157-5p                     | 1 |
| <i>circTMEM132D</i> | miR-3158-5p                     | 2 |
| <i>circTMEM132D</i> | miR-3159                        | 1 |

|                     |                    |   |
|---------------------|--------------------|---|
| <i>circTMEM132D</i> | miR-3160-3p        | 1 |
| <i>circTMEM132D</i> | miR-3160-5p        | 1 |
| <i>circTMEM132D</i> | miR-3165           | 1 |
| <i>circTMEM132D</i> | miR-3175           | 1 |
| <i>circTMEM132D</i> | miR-3184-3p        | 1 |
| <i>circTMEM132D</i> | miR-3187-3p        | 1 |
| <i>circTMEM132D</i> | miR-3188           | 1 |
| <i>circTMEM132D</i> | miR-3189-5p        | 1 |
| <i>circTMEM132D</i> | miR-3191-3p        | 3 |
| <i>circTMEM132D</i> | miR-3192-3p        | 1 |
| <i>circTMEM132D</i> | miR-3192-5p        | 1 |
| <i>circTMEM132D</i> | miR-3193           | 1 |
| <i>circTMEM132D</i> | miR-3195           | 1 |
| <i>circTMEM132D</i> | miR-3198/4309      | 1 |
| <i>circTMEM132D</i> | miR-3199/8052      | 1 |
| <i>circTMEM132D</i> | miR-3201/4791      | 1 |
| <i>circTMEM132D</i> | miR-3202           | 1 |
| <i>circTMEM132D</i> | miR-320e           | 1 |
| <i>circTMEM132D</i> | miR-323a-5p        | 1 |
| <i>circTMEM132D</i> | miR-324-3p/1913    | 1 |
| <i>circTMEM132D</i> | miR-324-5p         | 1 |
| <i>circTMEM132D</i> | miR-329-3p/362-3p  | 1 |
| <i>circTMEM132D</i> | miR-329-5p         | 1 |
| <i>circTMEM132D</i> | miR-342-5p/4664-5p | 1 |
| <i>circTMEM132D</i> | miR-345-3p         | 1 |
| <i>circTMEM132D</i> | miR-345-5p         | 1 |
| <i>circTMEM132D</i> | miR-3529-3p        | 1 |
| <i>circTMEM132D</i> | miR-3605-5p        | 1 |
| <i>circTMEM132D</i> | miR-361-3p         | 1 |
| <i>circTMEM132D</i> | miR-361-5p         | 1 |
| <i>circTMEM132D</i> | miR-3612           | 2 |
| <i>circTMEM132D</i> | miR-3618           | 1 |
| <i>circTMEM132D</i> | miR-3619-3p        | 1 |
| <i>circTMEM132D</i> | miR-362-5p/500b-5p | 1 |
| <i>circTMEM132D</i> | miR-363-5p/6745    | 1 |
| <i>circTMEM132D</i> | miR-3649           | 2 |
| <i>circTMEM132D</i> | miR-365-3p         | 1 |
| <i>circTMEM132D</i> | miR-3653-5p        | 1 |

|                     |                     |   |
|---------------------|---------------------|---|
| <i>circTMEM132D</i> | miR-365a-5p/365b-5p | 1 |
| <i>circTMEM132D</i> | miR-3665            | 1 |
| <i>circTMEM132D</i> | miR-3667-5p         | 1 |
| <i>circTMEM132D</i> | miR-3670            | 2 |
| <i>circTMEM132D</i> | miR-3678-3p         | 1 |
| <i>circTMEM132D</i> | miR-3687/4442       | 1 |
| <i>circTMEM132D</i> | miR-3692-3p         | 2 |
| <i>circTMEM132D</i> | miR-374a-3p         | 1 |
| <i>circTMEM132D</i> | miR-377-5p/6086     | 1 |
| <i>circTMEM132D</i> | miR-378-3p          | 1 |
| <i>circTMEM132D</i> | miR-378a-5p         | 1 |
| <i>circTMEM132D</i> | miR-381-5p          | 1 |
| <i>circTMEM132D</i> | miR-3908            | 1 |
| <i>circTMEM132D</i> | miR-3909            | 1 |
| <i>circTMEM132D</i> | miR-3912-5p         | 1 |
| <i>circTMEM132D</i> | miR-3913-3p         | 1 |
| <i>circTMEM132D</i> | miR-3914            | 1 |
| <i>circTMEM132D</i> | miR-3915            | 2 |
| <i>circTMEM132D</i> | miR-3919            | 1 |
| <i>circTMEM132D</i> | miR-3920            | 1 |
| <i>circTMEM132D</i> | miR-3925-3p         | 2 |
| <i>circTMEM132D</i> | miR-3925-5p         | 1 |
| <i>circTMEM132D</i> | miR-3926            | 1 |
| <i>circTMEM132D</i> | miR-3928-3p         | 3 |
| <i>circTMEM132D</i> | miR-3928-5p/6806-3p | 1 |
| <i>circTMEM132D</i> | miR-3929/4419b/4478 | 1 |
| <i>circTMEM132D</i> | miR-3942-5p         | 1 |
| <i>circTMEM132D</i> | miR-3943            | 1 |
| <i>circTMEM132D</i> | miR-3944-5p         | 1 |
| <i>circTMEM132D</i> | miR-3973            | 2 |
| <i>circTMEM132D</i> | miR-3974            | 1 |
| <i>circTMEM132D</i> | miR-3975            | 1 |
| <i>circTMEM132D</i> | miR-412-5p          | 1 |
| <i>circTMEM132D</i> | miR-421             | 1 |
| <i>circTMEM132D</i> | miR-423-5p          | 2 |
| <i>circTMEM132D</i> | miR-425-3p          | 1 |
| <i>circTMEM132D</i> | miR-4251            | 1 |
| <i>circTMEM132D</i> | miR-4257            | 2 |



|                     |                                    |   |
|---------------------|------------------------------------|---|
| <i>circTMEM132D</i> | miR-4261                           | 2 |
| <i>circTMEM132D</i> | miR-4268                           | 1 |
| <i>circTMEM132D</i> | miR-4270/4441/6754-5p              | 1 |
| <i>circTMEM132D</i> | miR-4279                           | 1 |
| <i>circTMEM132D</i> | miR-4283                           | 1 |
| <i>circTMEM132D</i> | miR-4286                           | 1 |
| <i>circTMEM132D</i> | miR-4287/4685-3p                   | 1 |
| <i>circTMEM132D</i> | miR-4293                           | 1 |
| <i>circTMEM132D</i> | miR-4294                           | 1 |
| <i>circTMEM132D</i> | miR-431-3p                         | 1 |
| <i>circTMEM132D</i> | miR-4313                           | 2 |
| <i>circTMEM132D</i> | miR-4316                           | 1 |
| <i>circTMEM132D</i> | miR-4320                           | 1 |
| <i>circTMEM132D</i> | miR-4323                           | 1 |
| <i>circTMEM132D</i> | miR-4324                           | 3 |
| <i>circTMEM132D</i> | miR-4329                           | 1 |
| <i>circTMEM132D</i> | miR-433-3p                         | 1 |
| <i>circTMEM132D</i> | miR-433-5p                         | 1 |
| <i>circTMEM132D</i> | miR-4419a/4510/6127/6129/6130/6133 | 1 |
| <i>circTMEM132D</i> | miR-4421/5699-3p                   | 2 |
| <i>circTMEM132D</i> | miR-4423-5p                        | 1 |
| <i>circTMEM132D</i> | miR-4433a-3p                       | 1 |
| <i>circTMEM132D</i> | miR-4434/4516/5703                 | 2 |
| <i>circTMEM132D</i> | miR-4435                           | 1 |
| <i>circTMEM132D</i> | miR-4436b-5p                       | 2 |
| <i>circTMEM132D</i> | miR-4438                           | 1 |
| <i>circTMEM132D</i> | miR-4448                           | 1 |
| <i>circTMEM132D</i> | miR-4449                           | 1 |
| <i>circTMEM132D</i> | miR-4454                           | 1 |
| <i>circTMEM132D</i> | miR-4459                           | 1 |
| <i>circTMEM132D</i> | miR-4463                           | 1 |
| <i>circTMEM132D</i> | miR-4464/4748                      | 1 |
| <i>circTMEM132D</i> | miR-4469                           | 1 |
| <i>circTMEM132D</i> | miR-4476/6876-5p                   | 1 |
| <i>circTMEM132D</i> | miR-4487                           | 1 |
| <i>circTMEM132D</i> | miR-4489                           | 1 |
| <i>circTMEM132D</i> | miR-4496                           | 2 |
| <i>circTMEM132D</i> | miR-4497                           | 1 |

|                     |                          |   |
|---------------------|--------------------------|---|
| <i>circTMEM132D</i> | miR-4499                 | 1 |
| <i>circTMEM132D</i> | miR-4504                 | 1 |
| <i>circTMEM132D</i> | miR-4506                 | 1 |
| <i>circTMEM132D</i> | miR-4508                 | 1 |
| <i>circTMEM132D</i> | miR-4515                 | 1 |
| <i>circTMEM132D</i> | miR-451b                 | 1 |
| <i>circTMEM132D</i> | miR-4520-3p              | 1 |
| <i>circTMEM132D</i> | miR-4520-5p              | 2 |
| <i>circTMEM132D</i> | miR-4529-5p              | 1 |
| <i>circTMEM132D</i> | miR-4532                 | 1 |
| <i>circTMEM132D</i> | miR-4533                 | 1 |
| <i>circTMEM132D</i> | miR-4535                 | 1 |
| <i>circTMEM132D</i> | miR-4536-3p              | 1 |
| <i>circTMEM132D</i> | miR-4537                 | 1 |
| <i>circTMEM132D</i> | miR-455-3p.1             | 1 |
| <i>circTMEM132D</i> | miR-455-3p.2             | 1 |
| <i>circTMEM132D</i> | miR-4633-3p/6500-5p      | 2 |
| <i>circTMEM132D</i> | miR-4638-3p              | 1 |
| <i>circTMEM132D</i> | miR-4640-3p              | 1 |
| <i>circTMEM132D</i> | miR-4649-3p              | 1 |
| <i>circTMEM132D</i> | miR-4650-5p              | 1 |
| <i>circTMEM132D</i> | miR-4652-3p              | 1 |
| <i>circTMEM132D</i> | miR-4652-5p              | 3 |
| <i>circTMEM132D</i> | miR-4656                 | 1 |
| <i>circTMEM132D</i> | miR-4659a-3p/4659b-3p    | 1 |
| <i>circTMEM132D</i> | miR-4661-3p              | 1 |
| <i>circTMEM132D</i> | miR-4667-3p              | 1 |
| <i>circTMEM132D</i> | miR-4667-5p/4700-5p/8089 | 1 |
| <i>circTMEM132D</i> | miR-4675/4741            | 1 |
| <i>circTMEM132D</i> | miR-4680-5p              | 1 |
| <i>circTMEM132D</i> | miR-4685-5p/6837-5p      | 1 |
| <i>circTMEM132D</i> | miR-4687-3p              | 1 |
| <i>circTMEM132D</i> | miR-4689/6858-5p         | 2 |
| <i>circTMEM132D</i> | miR-4695-5p              | 3 |
| <i>circTMEM132D</i> | miR-4699-3p              | 1 |
| <i>circTMEM132D</i> | miR-4700-3p              | 1 |
| <i>circTMEM132D</i> | miR-4706/4749-5p         | 1 |
| <i>circTMEM132D</i> | miR-4709-5p              | 1 |

|                     |                                  |   |
|---------------------|----------------------------------|---|
| <i>circTMEM132D</i> | miR-4710                         | 1 |
| <i>circTMEM132D</i> | miR-4713-3p                      | 2 |
| <i>circTMEM132D</i> | miR-4716-3p/6794-5p              | 2 |
| <i>circTMEM132D</i> | miR-4717-5p                      | 2 |
| <i>circTMEM132D</i> | miR-4723-5p/5698/6870-5p/7111-5p | 1 |
| <i>circTMEM132D</i> | miR-4724-3p                      | 1 |
| <i>circTMEM132D</i> | miR-4724-5p                      | 1 |
| <i>circTMEM132D</i> | miR-4726-3p                      | 2 |
| <i>circTMEM132D</i> | miR-4732-3p                      | 1 |
| <i>circTMEM132D</i> | miR-4734                         | 1 |
| <i>circTMEM132D</i> | miR-4738-3p                      | 1 |
| <i>circTMEM132D</i> | miR-4740-3p                      | 1 |
| <i>circTMEM132D</i> | miR-4740-5p                      | 1 |
| <i>circTMEM132D</i> | miR-4743-3p                      | 1 |
| <i>circTMEM132D</i> | miR-4747-5p/5196-5p              | 1 |
| <i>circTMEM132D</i> | miR-4753-3p                      | 1 |
| <i>circTMEM132D</i> | miR-4756-3p                      | 1 |
| <i>circTMEM132D</i> | miR-4758-3p                      | 1 |
| <i>circTMEM132D</i> | miR-4762-3p                      | 1 |
| <i>circTMEM132D</i> | miR-4762-5p                      | 1 |
| <i>circTMEM132D</i> | miR-4763-5p                      | 1 |
| <i>circTMEM132D</i> | miR-4768-3p                      | 1 |
| <i>circTMEM132D</i> | miR-4768-5p/6833-3p              | 1 |
| <i>circTMEM132D</i> | miR-4776-5p                      | 1 |
| <i>circTMEM132D</i> | miR-4777-3p                      | 1 |
| <i>circTMEM132D</i> | miR-4778-3p                      | 1 |
| <i>circTMEM132D</i> | miR-4779                         | 3 |
| <i>circTMEM132D</i> | miR-4780                         | 1 |
| <i>circTMEM132D</i> | miR-4782-5p/5706                 | 1 |
| <i>circTMEM132D</i> | miR-4786-5p                      | 1 |
| <i>circTMEM132D</i> | miR-4792                         | 1 |
| <i>circTMEM132D</i> | miR-4793-5p                      | 1 |
| <i>circTMEM132D</i> | miR-4800-5p                      | 1 |
| <i>circTMEM132D</i> | miR-485-5p                       | 1 |
| <i>circTMEM132D</i> | miR-486-3p                       | 1 |
| <i>circTMEM132D</i> | miR-489-3p                       | 1 |
| <i>circTMEM132D</i> | miR-492                          | 1 |
| <i>circTMEM132D</i> | miR-493-3p                       | 1 |

|                     |                             |   |
|---------------------|-----------------------------|---|
| <i>circTMEM132D</i> | miR-495-3p                  | 1 |
| <i>circTMEM132D</i> | miR-5002-3p                 | 1 |
| <i>circTMEM132D</i> | miR-5003-3p                 | 1 |
| <i>circTMEM132D</i> | miR-5004-3p                 | 1 |
| <i>circTMEM132D</i> | miR-5006-5p                 | 1 |
| <i>circTMEM132D</i> | miR-5008-3p/6737-3p/7157-3p | 1 |
| <i>circTMEM132D</i> | miR-5008-5p                 | 1 |
| <i>circTMEM132D</i> | miR-500b-3p                 | 1 |
| <i>circTMEM132D</i> | miR-501-5p                  | 1 |
| <i>circTMEM132D</i> | miR-5010-5p                 | 1 |
| <i>circTMEM132D</i> | miR-502-5p                  | 2 |
| <i>circTMEM132D</i> | miR-504-3p                  | 1 |
| <i>circTMEM132D</i> | miR-505-3p.2                | 1 |
| <i>circTMEM132D</i> | miR-508-5p                  | 1 |
| <i>circTMEM132D</i> | miR-5089-3p                 | 1 |
| <i>circTMEM132D</i> | miR-5090/6775-5p            | 1 |
| <i>circTMEM132D</i> | miR-5092                    | 1 |
| <i>circTMEM132D</i> | miR-513a-3p/513c-3p/3606-3p | 1 |
| <i>circTMEM132D</i> | miR-515-5p/519e-5p          | 2 |
| <i>circTMEM132D</i> | miR-516b-5p                 | 1 |
| <i>circTMEM132D</i> | miR-5189-3p                 | 1 |
| <i>circTMEM132D</i> | miR-519-3p                  | 1 |
| <i>circTMEM132D</i> | miR-5190                    | 1 |
| <i>circTMEM132D</i> | miR-5194                    | 2 |
| <i>circTMEM132D</i> | miR-5196-3p                 | 1 |
| <i>circTMEM132D</i> | miR-520g-3p                 | 2 |
| <i>circTMEM132D</i> | miR-523-3p                  | 1 |
| <i>circTMEM132D</i> | miR-524-5p                  | 1 |
| <i>circTMEM132D</i> | miR-525-5p                  | 2 |
| <i>circTMEM132D</i> | miR-541-5p                  | 1 |
| <i>circTMEM132D</i> | miR-542-3p                  | 1 |
| <i>circTMEM132D</i> | miR-544b                    | 3 |
| <i>circTMEM132D</i> | miR-545-3p                  | 1 |
| <i>circTMEM132D</i> | miR-548ah-5p/3609           | 1 |
| <i>circTMEM132D</i> | miR-548ao-3p                | 1 |
| <i>circTMEM132D</i> | miR-548e-5p                 | 1 |
| <i>circTMEM132D</i> | miR-548s                    | 1 |
| <i>circTMEM132D</i> | miR-548u/7161-5p            | 1 |

|                     |                               |   |
|---------------------|-------------------------------|---|
| <i>circTMEM132D</i> | miR-549a                      | 1 |
| <i>circTMEM132D</i> | miR-550a-3-5p/550a-5p/1271-3p | 1 |
| <i>circTMEM132D</i> | miR-558                       | 1 |
| <i>circTMEM132D</i> | miR-5584-5p                   | 1 |
| <i>circTMEM132D</i> | miR-5586-5p                   | 2 |
| <i>circTMEM132D</i> | miR-5588-3p                   | 1 |
| <i>circTMEM132D</i> | miR-5680                      | 1 |
| <i>circTMEM132D</i> | miR-5690                      | 1 |
| <i>circTMEM132D</i> | miR-5696                      | 1 |
| <i>circTMEM132D</i> | miR-5699-5p                   | 1 |
| <i>circTMEM132D</i> | miR-5702                      | 1 |
| <i>circTMEM132D</i> | miR-579-3p                    | 1 |
| <i>circTMEM132D</i> | miR-584-3p                    | 1 |
| <i>circTMEM132D</i> | miR-588                       | 1 |
| <i>circTMEM132D</i> | miR-589-5p                    | 1 |
| <i>circTMEM132D</i> | miR-590-3p                    | 1 |
| <i>circTMEM132D</i> | miR-596                       | 1 |
| <i>circTMEM132D</i> | miR-597-3p                    | 1 |
| <i>circTMEM132D</i> | miR-603                       | 1 |
| <i>circTMEM132D</i> | miR-604                       | 2 |
| <i>circTMEM132D</i> | miR-605-5p                    | 1 |
| <i>circTMEM132D</i> | miR-6075                      | 1 |
| <i>circTMEM132D</i> | miR-6077                      | 1 |
| <i>circTMEM132D</i> | miR-608/4651                  | 1 |
| <i>circTMEM132D</i> | miR-6081                      | 1 |
| <i>circTMEM132D</i> | miR-6089                      | 1 |
| <i>circTMEM132D</i> | miR-6090                      | 1 |
| <i>circTMEM132D</i> | miR-611/3131                  | 1 |
| <i>circTMEM132D</i> | miR-6125                      | 1 |
| <i>circTMEM132D</i> | miR-6126                      | 1 |
| <i>circTMEM132D</i> | miR-6131                      | 1 |
| <i>circTMEM132D</i> | miR-6132/6836-5p              | 1 |
| <i>circTMEM132D</i> | miR-6134                      | 1 |
| <i>circTMEM132D</i> | miR-615-3p                    | 1 |
| <i>circTMEM132D</i> | miR-616-3p                    | 1 |
| <i>circTMEM132D</i> | miR-619-3p                    | 1 |
| <i>circTMEM132D</i> | miR-619-5p/6506-5p            | 1 |
| <i>circTMEM132D</i> | miR-625-3p                    | 1 |

|                     |                     |   |
|---------------------|---------------------|---|
| <i>circTMEM132D</i> | miR-625-5p          | 1 |
| <i>circTMEM132D</i> | miR-627-3p          | 1 |
| <i>circTMEM132D</i> | miR-627-5p          | 1 |
| <i>circTMEM132D</i> | miR-628-5p          | 1 |
| <i>circTMEM132D</i> | miR-629-3p          | 1 |
| <i>circTMEM132D</i> | miR-631/3661        | 1 |
| <i>circTMEM132D</i> | miR-637             | 1 |
| <i>circTMEM132D</i> | miR-638             | 2 |
| <i>circTMEM132D</i> | miR-642-3p          | 1 |
| <i>circTMEM132D</i> | miR-6501-5p         | 1 |
| <i>circTMEM132D</i> | miR-6507-3p         | 1 |
| <i>circTMEM132D</i> | miR-6509-3p         | 2 |
| <i>circTMEM132D</i> | miR-6511-5p         | 2 |
| <i>circTMEM132D</i> | miR-6513-3p         | 1 |
| <i>circTMEM132D</i> | miR-6514-3p         | 2 |
| <i>circTMEM132D</i> | miR-6516-5p         | 1 |
| <i>circTMEM132D</i> | miR-652-5p          | 1 |
| <i>circTMEM132D</i> | miR-655-5p          | 1 |
| <i>circTMEM132D</i> | miR-656-5p          | 1 |
| <i>circTMEM132D</i> | miR-657             | 1 |
| <i>circTMEM132D</i> | miR-659-5p          | 1 |
| <i>circTMEM132D</i> | miR-660-5p          | 1 |
| <i>circTMEM132D</i> | miR-662             | 1 |
| <i>circTMEM132D</i> | miR-663b            | 2 |
| <i>circTMEM132D</i> | miR-670-5p          | 1 |
| <i>circTMEM132D</i> | miR-6720-5p         | 2 |
| <i>circTMEM132D</i> | miR-6721-5p         | 2 |
| <i>circTMEM132D</i> | miR-6731-5p/8085    | 1 |
| <i>circTMEM132D</i> | miR-6732-3p         | 1 |
| <i>circTMEM132D</i> | miR-6732-5p         | 2 |
| <i>circTMEM132D</i> | miR-6734-5p         | 1 |
| <i>circTMEM132D</i> | miR-6742-3p         | 1 |
| <i>circTMEM132D</i> | miR-6746-5p         | 2 |
| <i>circTMEM132D</i> | miR-6747-5p         | 1 |
| <i>circTMEM132D</i> | miR-6748-3p         | 2 |
| <i>circTMEM132D</i> | miR-6749-5p         | 2 |
| <i>circTMEM132D</i> | miR-675-5p/4466     | 1 |
| <i>circTMEM132D</i> | miR-6750-5p/6822-5p | 1 |

|                     |                             |   |
|---------------------|-----------------------------|---|
| <i>circTMEM132D</i> | miR-6752-5p/6842-5p/7110-5p | 1 |
| <i>circTMEM132D</i> | miR-6753-5p                 | 1 |
| <i>circTMEM132D</i> | miR-6756-5p/6766-5p         | 1 |
| <i>circTMEM132D</i> | miR-6757-5p                 | 1 |
| <i>circTMEM132D</i> | miR-6758-5p/6856-5p         | 1 |
| <i>circTMEM132D</i> | miR-676-3p                  | 1 |
| <i>circTMEM132D</i> | miR-6761-5p                 | 1 |
| <i>circTMEM132D</i> | miR-6762-3p                 | 2 |
| <i>circTMEM132D</i> | miR-6763-3p                 | 1 |
| <i>circTMEM132D</i> | miR-6768-5p                 | 1 |
| <i>circTMEM132D</i> | miR-6769a-3p                | 1 |
| <i>circTMEM132D</i> | miR-6770-5p                 | 2 |
| <i>circTMEM132D</i> | miR-6771-3p                 | 1 |
| <i>circTMEM132D</i> | miR-6771-5p                 | 1 |
| <i>circTMEM132D</i> | miR-6777-5p/6889-5p         | 1 |
| <i>circTMEM132D</i> | miR-6780b-3p                | 1 |
| <i>circTMEM132D</i> | miR-6783-5p                 | 2 |
| <i>circTMEM132D</i> | miR-6784-5p                 | 1 |
| <i>circTMEM132D</i> | miR-6786-5p                 | 1 |
| <i>circTMEM132D</i> | miR-6798-5p                 | 2 |
| <i>circTMEM132D</i> | miR-6799-5p                 | 1 |
| <i>circTMEM132D</i> | miR-6804-5p                 | 1 |
| <i>circTMEM132D</i> | miR-6805-5p                 | 2 |
| <i>circTMEM132D</i> | miR-6807-5p                 | 1 |
| <i>circTMEM132D</i> | miR-6809-3p                 | 1 |
| <i>circTMEM132D</i> | miR-6811-3p                 | 1 |
| <i>circTMEM132D</i> | miR-6821-5p                 | 1 |
| <i>circTMEM132D</i> | miR-6825-5p                 | 1 |
| <i>circTMEM132D</i> | miR-6829-5p                 | 1 |
| <i>circTMEM132D</i> | miR-6830-3p                 | 1 |
| <i>circTMEM132D</i> | miR-6834-5p                 | 1 |
| <i>circTMEM132D</i> | miR-6835-5p                 | 1 |
| <i>circTMEM132D</i> | miR-6840-3p                 | 2 |
| <i>circTMEM132D</i> | miR-6840-5p                 | 1 |
| <i>circTMEM132D</i> | miR-6841-3p                 | 2 |
| <i>circTMEM132D</i> | miR-6844                    | 1 |
| <i>circTMEM132D</i> | miR-6846-3p                 | 1 |
| <i>circTMEM132D</i> | miR-6847-5p                 | 2 |

|                     |                           |   |
|---------------------|---------------------------|---|
| <i>circTMEM132D</i> | miR-6849-3p               | 2 |
| <i>circTMEM132D</i> | miR-6850-3p               | 1 |
| <i>circTMEM132D</i> | miR-6852-5p               | 1 |
| <i>circTMEM132D</i> | miR-6853-5p               | 2 |
| <i>circTMEM132D</i> | miR-6859-3p               | 1 |
| <i>circTMEM132D</i> | miR-6861-3p               | 1 |
| <i>circTMEM132D</i> | miR-6863                  | 1 |
| <i>circTMEM132D</i> | miR-6864-5p               | 1 |
| <i>circTMEM132D</i> | miR-6868-3p               | 1 |
| <i>circTMEM132D</i> | miR-6871-5p               | 1 |
| <i>circTMEM132D</i> | miR-6873-5p               | 1 |
| <i>circTMEM132D</i> | miR-6874-5p               | 2 |
| <i>circTMEM132D</i> | miR-6875-3p               | 1 |
| <i>circTMEM132D</i> | miR-6878-5p               | 1 |
| <i>circTMEM132D</i> | miR-6880-5p               | 1 |
| <i>circTMEM132D</i> | miR-6882-3p               | 4 |
| <i>circTMEM132D</i> | miR-6885-3p               | 1 |
| <i>circTMEM132D</i> | miR-6886-5p               | 1 |
| <i>circTMEM132D</i> | miR-6888-5p               | 2 |
| <i>circTMEM132D</i> | miR-6889-3p               | 1 |
| <i>circTMEM132D</i> | miR-6894-3p               | 2 |
| <i>circTMEM132D</i> | miR-6894-5p               | 2 |
| <i>circTMEM132D</i> | miR-7-5p                  | 1 |
| <i>circTMEM132D</i> | miR-7106-5p               | 1 |
| <i>circTMEM132D</i> | miR-711                   | 1 |
| <i>circTMEM132D</i> | miR-7113-3p               | 1 |
| <i>circTMEM132D</i> | miR-7113-5p               | 1 |
| <i>circTMEM132D</i> | miR-7152-5p               | 2 |
| <i>circTMEM132D</i> | miR-7154-3p               | 2 |
| <i>circTMEM132D</i> | miR-7154-5p               | 1 |
| <i>circTMEM132D</i> | miR-7155-5p               | 1 |
| <i>circTMEM132D</i> | miR-7159-5p               | 1 |
| <i>circTMEM132D</i> | miR-7162-3p               | 1 |
| <i>circTMEM132D</i> | miR-744-5p                | 1 |
| <i>circTMEM132D</i> | miR-762/4492/4498/5001-5p | 1 |
| <i>circTMEM132D</i> | miR-765                   | 2 |
| <i>circTMEM132D</i> | miR-766-3p                | 2 |
| <i>circTMEM132D</i> | miR-766-5p                | 2 |



|                     |                              |   |
|---------------------|------------------------------|---|
| <i>circTMEM132D</i> | miR-769-5p                   | 1 |
| <i>circTMEM132D</i> | miR-7844-5p                  | 1 |
| <i>circTMEM132D</i> | miR-7847-3p                  | 2 |
| <i>circTMEM132D</i> | miR-7850-5p                  | 1 |
| <i>circTMEM132D</i> | miR-7851-3p                  | 1 |
| <i>circTMEM132D</i> | miR-7854-3p                  | 1 |
| <i>circTMEM132D</i> | miR-7973                     | 1 |
| <i>circTMEM132D</i> | miR-7974                     | 1 |
| <i>circTMEM132D</i> | miR-8071                     | 1 |
| <i>circTMEM132D</i> | miR-8485                     | 1 |
| <i>circTMEM132D</i> | miR-873-3p                   | 1 |
| <i>circTMEM132D</i> | miR-873-5p.1                 | 1 |
| <i>circTMEM132D</i> | miR-874-5p                   | 1 |
| <i>circTMEM132D</i> | miR-875-5p                   | 1 |
| <i>circTMEM132D</i> | miR-876-3p                   | 1 |
| <i>circTMEM132D</i> | miR-876-5p                   | 1 |
| <i>circTMEM132D</i> | miR-877-3p                   | 1 |
| <i>circTMEM132D</i> | miR-885-3p                   | 1 |
| <i>circTMEM132D</i> | miR-920/4300/5591-5p/6726-5p | 1 |
| <i>circTMEM132D</i> | miR-92b-5p                   | 1 |
| <i>circTMEM132D</i> | miR-934                      | 1 |
| <i>circTMEM132D</i> | miR-937-5p                   | 1 |
| <i>circTMEM132D</i> | miR-939-3p                   | 1 |
| <i>circTMEM132D</i> | miR-939-5p/1343-5p           | 1 |
| <i>circTMEM132D</i> | miR-942-5p                   | 1 |
| <i>circTMEM132D</i> | miR-9500                     | 1 |
| <i>circTMEM132D</i> | miR-96-3p                    | 2 |
| <i>circTOP1</i>     | let-7-5p/98-5p               | 1 |
| <i>circTOP1</i>     | let-7a-2-3p/let-7g-3p        | 1 |
| <i>circTOP1</i>     | let-7c-3p                    | 1 |
| <i>circTOP1</i>     | miR-101-3p.2                 | 1 |
| <i>circTOP1</i>     | miR-10b-3p                   | 2 |
| <i>circTOP1</i>     | miR-1178-3p                  | 1 |
| <i>circTOP1</i>     | miR-1179                     | 1 |
| <i>circTOP1</i>     | miR-1183                     | 1 |
| <i>circTOP1</i>     | miR-1185-5p                  | 2 |
| <i>circTOP1</i>     | miR-1193                     | 1 |
| <i>circTOP1</i>     | miR-1199-3p                  | 1 |

|                 |                     |   |
|-----------------|---------------------|---|
| <i>circTOP1</i> | miR-1199-5p/6751-3p | 1 |
| <i>circTOP1</i> | miR-1207-3p         | 1 |
| <i>circTOP1</i> | miR-1208            | 1 |
| <i>circTOP1</i> | miR-1224-5p         | 1 |
| <i>circTOP1</i> | miR-1225-5p         | 1 |
| <i>circTOP1</i> | miR-1227-5p         | 2 |
| <i>circTOP1</i> | miR-1229-5p         | 1 |
| <i>circTOP1</i> | miR-1233-5p/6778-5p | 1 |
| <i>circTOP1</i> | miR-1236-3p         | 3 |
| <i>circTOP1</i> | miR-1238-3p         | 1 |
| <i>circTOP1</i> | miR-124-5p          | 1 |
| <i>circTOP1</i> | miR-1243            | 1 |
| <i>circTOP1</i> | miR-1246            | 1 |
| <i>circTOP1</i> | miR-1250-3p         | 1 |
| <i>circTOP1</i> | miR-1251-3p         | 2 |
| <i>circTOP1</i> | miR-1252-3p         | 3 |
| <i>circTOP1</i> | miR-1252-5p         | 2 |
| <i>circTOP1</i> | miR-1253            | 2 |
| <i>circTOP1</i> | miR-1255a/1255b-5p  | 1 |
| <i>circTOP1</i> | miR-126-5p          | 1 |
| <i>circTOP1</i> | miR-1261            | 2 |
| <i>circTOP1</i> | miR-1264            | 1 |
| <i>circTOP1</i> | miR-1265            | 1 |
| <i>circTOP1</i> | miR-127-5p          | 1 |
| <i>circTOP1</i> | miR-1270            | 1 |
| <i>circTOP1</i> | miR-1272            | 2 |
| <i>circTOP1</i> | miR-1273f           | 1 |
| <i>circTOP1</i> | miR-1273g-3p        | 1 |
| <i>circTOP1</i> | miR-1273g-5p        | 2 |
| <i>circTOP1</i> | miR-1276            | 1 |
| <i>circTOP1</i> | miR-1277-3p         | 1 |
| <i>circTOP1</i> | miR-1278            | 1 |
| <i>circTOP1</i> | miR-1279            | 1 |
| <i>circTOP1</i> | miR-1284            | 1 |
| <i>circTOP1</i> | miR-1287-5p         | 3 |
| <i>circTOP1</i> | miR-129-5p          | 1 |
| <i>circTOP1</i> | miR-1293/4483       | 1 |
| <i>circTOP1</i> | miR-1298-3p         | 1 |

|                 |                                     |   |
|-----------------|-------------------------------------|---|
| <i>circTOP1</i> | miR-1298-5p                         | 1 |
| <i>circTOP1</i> | miR-1299                            | 2 |
| <i>circTOP1</i> | miR-1301-5p/6502-5p                 | 1 |
| <i>circTOP1</i> | miR-1302/4298                       | 1 |
| <i>circTOP1</i> | miR-130b-5p                         | 2 |
| <i>circTOP1</i> | miR-1322                            | 2 |
| <i>circTOP1</i> | miR-134-3p                          | 1 |
| <i>circTOP1</i> | miR-1343-3p                         | 2 |
| <i>circTOP1</i> | miR-139-3p                          | 1 |
| <i>circTOP1</i> | miR-139-5p                          | 1 |
| <i>circTOP1</i> | miR-140-5p                          | 2 |
| <i>circTOP1</i> | miR-141-5p                          | 1 |
| <i>circTOP1</i> | miR-142-5p                          | 1 |
| <i>circTOP1</i> | miR-143-3p                          | 1 |
| <i>circTOP1</i> | miR-145-3p                          | 1 |
| <i>circTOP1</i> | miR-145-5p                          | 2 |
| <i>circTOP1</i> | miR-146-5p                          | 1 |
| <i>circTOP1</i> | miR-149-3p/4728-5p/6785-5p/6883-5p  | 1 |
| <i>circTOP1</i> | miR-149-5p                          | 1 |
| <i>circTOP1</i> | miR-151-3p                          | 1 |
| <i>circTOP1</i> | miR-151-5p                          | 1 |
| <i>circTOP1</i> | miR-153-5p                          | 1 |
| <i>circTOP1</i> | miR-154-3p/487-3p                   | 1 |
| <i>circTOP1</i> | miR-1587/3620-5p                    | 1 |
| <i>circTOP1</i> | miR-16-2-3p/195-3p                  | 1 |
| <i>circTOP1</i> | miR-17-5p/20-5p/93-5p/106-5p/519-3p | 2 |
| <i>circTOP1</i> | miR-18-5p                           | 1 |
| <i>circTOP1</i> | miR-181-3p/4420                     | 1 |
| <i>circTOP1</i> | miR-181-5p                          | 1 |
| <i>circTOP1</i> | miR-182-5p                          | 3 |
| <i>circTOP1</i> | miR-185-3p                          | 1 |
| <i>circTOP1</i> | miR-186-5p                          | 2 |
| <i>circTOP1</i> | miR-18a-3p                          | 1 |
| <i>circTOP1</i> | miR-190-5p                          | 1 |
| <i>circTOP1</i> | miR-1909-3p/6722-3p                 | 1 |
| <i>circTOP1</i> | miR-1909-5p                         | 1 |
| <i>circTOP1</i> | miR-1915-5p                         | 1 |
| <i>circTOP1</i> | miR-193-3p                          | 1 |

|                 |                     |   |
|-----------------|---------------------|---|
| <i>circTOP1</i> | miR-198             | 2 |
| <i>circTOP1</i> | miR-199-3p          | 1 |
| <i>circTOP1</i> | miR-200-3p/429      | 2 |
| <i>circTOP1</i> | miR-200c-5p/550a-3p | 1 |
| <i>circTOP1</i> | miR-202-3p          | 1 |
| <i>circTOP1</i> | miR-202-5p          | 1 |
| <i>circTOP1</i> | miR-203a-5p         | 2 |
| <i>circTOP1</i> | miR-203b-3p         | 1 |
| <i>circTOP1</i> | miR-203b-5p/6718-5p | 1 |
| <i>circTOP1</i> | miR-205-3p          | 1 |
| <i>circTOP1</i> | miR-205-5p          | 2 |
| <i>circTOP1</i> | miR-2053            | 1 |
| <i>circTOP1</i> | miR-20b-3p          | 2 |
| <i>circTOP1</i> | miR-2113            | 1 |
| <i>circTOP1</i> | miR-2115-5p         | 1 |
| <i>circTOP1</i> | miR-2117            | 1 |
| <i>circTOP1</i> | miR-212-5p          | 4 |
| <i>circTOP1</i> | miR-214-5p          | 1 |
| <i>circTOP1</i> | miR-216b-3p         | 2 |
| <i>circTOP1</i> | miR-22-3p           | 1 |
| <i>circTOP1</i> | miR-221-3p/222-3p   | 1 |
| <i>circTOP1</i> | miR-222-5p          | 2 |
| <i>circTOP1</i> | miR-223-5p          | 1 |
| <i>circTOP1</i> | miR-2278            | 2 |
| <i>circTOP1</i> | miR-23-3p           | 1 |
| <i>circTOP1</i> | miR-2392            | 2 |
| <i>circTOP1</i> | miR-24-3p           | 3 |
| <i>circTOP1</i> | miR-2467-5p         | 2 |
| <i>circTOP1</i> | miR-2681-3p         | 2 |
| <i>circTOP1</i> | miR-27a-5p          | 1 |
| <i>circTOP1</i> | miR-27b-5p          | 1 |
| <i>circTOP1</i> | miR-29-3p           | 1 |
| <i>circTOP1</i> | miR-296-3p          | 1 |
| <i>circTOP1</i> | miR-297             | 1 |
| <i>circTOP1</i> | miR-299-5p          | 1 |
| <i>circTOP1</i> | miR-29a-5p          | 2 |
| <i>circTOP1</i> | miR-29b-2-5p        | 1 |
| <i>circTOP1</i> | miR-30-3p           | 3 |

|                 |                           |   |
|-----------------|---------------------------|---|
| <i>circTOP1</i> | miR-302a-5p               | 1 |
| <i>circTOP1</i> | miR-302b-5p/302d-5p       | 3 |
| <i>circTOP1</i> | miR-302c-3p.2/520-3p      | 1 |
| <i>circTOP1</i> | miR-3074-5p               | 1 |
| <i>circTOP1</i> | miR-3119                  | 1 |
| <i>circTOP1</i> | miR-3120-5p               | 1 |
| <i>circTOP1</i> | miR-3121-3p               | 1 |
| <i>circTOP1</i> | miR-3124-3p               | 2 |
| <i>circTOP1</i> | miR-3126-3p               | 1 |
| <i>circTOP1</i> | miR-3129-3p/5583-5p       | 1 |
| <i>circTOP1</i> | miR-3130-3p               | 1 |
| <i>circTOP1</i> | miR-3133                  | 2 |
| <i>circTOP1</i> | miR-3134                  | 2 |
| <i>circTOP1</i> | miR-3135b                 | 3 |
| <i>circTOP1</i> | miR-3136-5p/4439          | 1 |
| <i>circTOP1</i> | miR-3137                  | 2 |
| <i>circTOP1</i> | miR-3148                  | 1 |
| <i>circTOP1</i> | miR-3150b-3p              | 4 |
| <i>circTOP1</i> | miR-3151-5p               | 1 |
| <i>circTOP1</i> | miR-3154                  | 2 |
| <i>circTOP1</i> | miR-3156-5p               | 3 |
| <i>circTOP1</i> | miR-3161                  | 1 |
| <i>circTOP1</i> | miR-3163                  | 2 |
| <i>circTOP1</i> | miR-3165                  | 1 |
| <i>circTOP1</i> | miR-3170/6855-5p          | 1 |
| <i>circTOP1</i> | miR-3171                  | 1 |
| <i>circTOP1</i> | miR-3180-5p               | 2 |
| <i>circTOP1</i> | miR-3181                  | 1 |
| <i>circTOP1</i> | miR-3183/4723-3p/6769b-3p | 1 |
| <i>circTOP1</i> | miR-3184-3p               | 1 |
| <i>circTOP1</i> | miR-3185                  | 2 |
| <i>circTOP1</i> | miR-3187-3p               | 2 |
| <i>circTOP1</i> | miR-3188                  | 2 |
| <i>circTOP1</i> | miR-3189-3p               | 4 |
| <i>circTOP1</i> | miR-3189-5p               | 1 |
| <i>circTOP1</i> | miR-3190-3p               | 1 |
| <i>circTOP1</i> | miR-3191-5p               | 3 |
| <i>circTOP1</i> | miR-3198/4309             | 1 |

|                 |                    |   |
|-----------------|--------------------|---|
| <i>circTOP1</i> | miR-32-3p          | 2 |
| <i>circTOP1</i> | miR-3200-3p        | 5 |
| <i>circTOP1</i> | miR-3201/4791      | 1 |
| <i>circTOP1</i> | miR-320e           | 1 |
| <i>circTOP1</i> | miR-323a-5p        | 1 |
| <i>circTOP1</i> | miR-323b-3p        | 1 |
| <i>circTOP1</i> | miR-324-3p/1913    | 1 |
| <i>circTOP1</i> | miR-326            | 2 |
| <i>circTOP1</i> | miR-329-5p         | 1 |
| <i>circTOP1</i> | miR-335-3p         | 3 |
| <i>circTOP1</i> | miR-33a-3p         | 1 |
| <i>circTOP1</i> | miR-340-3p/6827-3p | 1 |
| <i>circTOP1</i> | miR-342-5p/4664-5p | 1 |
| <i>circTOP1</i> | miR-346            | 1 |
| <i>circTOP1</i> | miR-3605-5p        | 2 |
| <i>circTOP1</i> | miR-3606-5p        | 1 |
| <i>circTOP1</i> | miR-3611           | 2 |
| <i>circTOP1</i> | miR-3612           | 1 |
| <i>circTOP1</i> | miR-3614-5p        | 1 |
| <i>circTOP1</i> | miR-362-5p/500b-5p | 3 |
| <i>circTOP1</i> | miR-3620-3p        | 1 |
| <i>circTOP1</i> | miR-3622b-5p       | 1 |
| <i>circTOP1</i> | miR-363-5p/6745    | 1 |
| <i>circTOP1</i> | miR-3646           | 3 |
| <i>circTOP1</i> | miR-3648           | 1 |
| <i>circTOP1</i> | miR-3652/4430      | 2 |
| <i>circTOP1</i> | miR-3653-3p        | 2 |
| <i>circTOP1</i> | miR-3654           | 1 |
| <i>circTOP1</i> | miR-3658           | 1 |
| <i>circTOP1</i> | miR-3662           | 1 |
| <i>circTOP1</i> | miR-3663-3p        | 1 |
| <i>circTOP1</i> | miR-3675-3p        | 1 |
| <i>circTOP1</i> | miR-3680-3p        | 1 |
| <i>circTOP1</i> | miR-3682-3p        | 1 |
| <i>circTOP1</i> | miR-3682-5p        | 1 |
| <i>circTOP1</i> | miR-3685           | 1 |
| <i>circTOP1</i> | miR-3686           | 1 |
| <i>circTOP1</i> | miR-3687/4442      | 2 |

|                 |                                   |   |
|-----------------|-----------------------------------|---|
| <i>circTOP1</i> | miR-3688-3p                       | 1 |
| <i>circTOP1</i> | miR-3689a-5p/3689b-5p/3689e/3689f | 1 |
| <i>circTOP1</i> | miR-3689d/6851-5p                 | 1 |
| <i>circTOP1</i> | miR-369-3p                        | 3 |
| <i>circTOP1</i> | miR-3690                          | 2 |
| <i>circTOP1</i> | miR-3691-3p                       | 2 |
| <i>circTOP1</i> | miR-3692-3p                       | 3 |
| <i>circTOP1</i> | miR-374-5p/655-3p                 | 1 |
| <i>circTOP1</i> | miR-374a-3p                       | 2 |
| <i>circTOP1</i> | miR-374b-3p                       | 2 |
| <i>circTOP1</i> | miR-376b-5p/376c-5p               | 2 |
| <i>circTOP1</i> | miR-377-5p/6086                   | 1 |
| <i>circTOP1</i> | miR-378-3p                        | 1 |
| <i>circTOP1</i> | miR-378g                          | 1 |
| <i>circTOP1</i> | miR-378j/6839-5p                  | 1 |
| <i>circTOP1</i> | miR-382-5p                        | 1 |
| <i>circTOP1</i> | miR-383-5p.2                      | 1 |
| <i>circTOP1</i> | miR-384                           | 1 |
| <i>circTOP1</i> | miR-3908                          | 1 |
| <i>circTOP1</i> | miR-3912-5p                       | 1 |
| <i>circTOP1</i> | miR-3913-3p                       | 1 |
| <i>circTOP1</i> | miR-3914                          | 2 |
| <i>circTOP1</i> | miR-3915                          | 1 |
| <i>circTOP1</i> | miR-3922-5p                       | 1 |
| <i>circTOP1</i> | miR-3925-3p                       | 2 |
| <i>circTOP1</i> | miR-3926                          | 2 |
| <i>circTOP1</i> | miR-3928-5p/6806-3p               | 1 |
| <i>circTOP1</i> | miR-3929/4419b/4478               | 1 |
| <i>circTOP1</i> | miR-3934-3p                       | 1 |
| <i>circTOP1</i> | miR-3942-5p                       | 1 |
| <i>circTOP1</i> | miR-3944-3p                       | 1 |
| <i>circTOP1</i> | miR-3945                          | 1 |
| <i>circTOP1</i> | miR-3973                          | 2 |
| <i>circTOP1</i> | miR-3975                          | 2 |
| <i>circTOP1</i> | miR-3978                          | 2 |
| <i>circTOP1</i> | miR-409-3p                        | 2 |
| <i>circTOP1</i> | miR-412-5p                        | 1 |
| <i>circTOP1</i> | miR-4252                          | 1 |

|                 |                       |   |
|-----------------|-----------------------|---|
| <i>circTOP1</i> | miR-4253/6862-5p      | 1 |
| <i>circTOP1</i> | miR-4254              | 2 |
| <i>circTOP1</i> | miR-4257              | 1 |
| <i>circTOP1</i> | miR-4260              | 2 |
| <i>circTOP1</i> | miR-4261              | 2 |
| <i>circTOP1</i> | miR-4265/4296/4322    | 1 |
| <i>circTOP1</i> | miR-4267              | 1 |
| <i>circTOP1</i> | miR-4270/4441/6754-5p | 1 |
| <i>circTOP1</i> | miR-4273/7156-5p      | 2 |
| <i>circTOP1</i> | miR-4279              | 1 |
| <i>circTOP1</i> | miR-4282              | 1 |
| <i>circTOP1</i> | miR-4283              | 1 |
| <i>circTOP1</i> | miR-4284              | 3 |
| <i>circTOP1</i> | miR-4291              | 1 |
| <i>circTOP1</i> | miR-4293              | 1 |
| <i>circTOP1</i> | miR-4297/5581-5p      | 1 |
| <i>circTOP1</i> | miR-4310/7157-5p      | 1 |
| <i>circTOP1</i> | miR-4311              | 1 |
| <i>circTOP1</i> | miR-4314              | 2 |
| <i>circTOP1</i> | miR-4318              | 1 |
| <i>circTOP1</i> | miR-432-3p            | 2 |
| <i>circTOP1</i> | miR-432-5p            | 1 |
| <i>circTOP1</i> | miR-4328              | 2 |
| <i>circTOP1</i> | miR-433-3p            | 1 |
| <i>circTOP1</i> | miR-4423-5p           | 1 |
| <i>circTOP1</i> | miR-4424              | 1 |
| <i>circTOP1</i> | miR-4426/4647/4662b   | 1 |
| <i>circTOP1</i> | miR-4433a-3p          | 1 |
| <i>circTOP1</i> | miR-4434/4516/5703    | 2 |
| <i>circTOP1</i> | miR-4435              | 2 |
| <i>circTOP1</i> | miR-4436b-5p          | 3 |
| <i>circTOP1</i> | miR-4437              | 1 |
| <i>circTOP1</i> | miR-4443              | 2 |
| <i>circTOP1</i> | miR-4447/4472         | 1 |
| <i>circTOP1</i> | miR-4457              | 1 |
| <i>circTOP1</i> | miR-4459              | 1 |
| <i>circTOP1</i> | miR-4464/4748         | 1 |
| <i>circTOP1</i> | miR-4468              | 2 |



|                 |                       |   |
|-----------------|-----------------------|---|
| <i>circTOP1</i> | miR-4470              | 1 |
| <i>circTOP1</i> | miR-4480              | 3 |
| <i>circTOP1</i> | miR-4486              | 1 |
| <i>circTOP1</i> | miR-4489              | 1 |
| <i>circTOP1</i> | miR-4496              | 2 |
| <i>circTOP1</i> | miR-4501              | 1 |
| <i>circTOP1</i> | miR-4502              | 1 |
| <i>circTOP1</i> | miR-4503              | 1 |
| <i>circTOP1</i> | miR-4505/5787         | 2 |
| <i>circTOP1</i> | miR-450a-2-3p         | 2 |
| <i>circTOP1</i> | miR-450b-5p           | 1 |
| <i>circTOP1</i> | miR-4511              | 2 |
| <i>circTOP1</i> | miR-4517              | 1 |
| <i>circTOP1</i> | miR-452-3p            | 3 |
| <i>circTOP1</i> | miR-4521              | 1 |
| <i>circTOP1</i> | miR-4527/6503-5p      | 1 |
| <i>circTOP1</i> | miR-4531              | 1 |
| <i>circTOP1</i> | miR-4534/8082         | 2 |
| <i>circTOP1</i> | miR-4535              | 1 |
| <i>circTOP1</i> | miR-4633-5p           | 1 |
| <i>circTOP1</i> | miR-4635              | 1 |
| <i>circTOP1</i> | miR-4638-3p           | 1 |
| <i>circTOP1</i> | miR-4639-5p           | 1 |
| <i>circTOP1</i> | miR-4641              | 2 |
| <i>circTOP1</i> | miR-4642              | 2 |
| <i>circTOP1</i> | miR-4648              | 1 |
| <i>circTOP1</i> | miR-4652-3p           | 1 |
| <i>circTOP1</i> | miR-4653-3p           | 1 |
| <i>circTOP1</i> | miR-4654/4769-5p      | 1 |
| <i>circTOP1</i> | miR-4659a-3p/4659b-3p | 1 |
| <i>circTOP1</i> | miR-4659a-5p/4659b-5p | 1 |
| <i>circTOP1</i> | miR-4662-5p           | 1 |
| <i>circTOP1</i> | miR-4666a-5p          | 1 |
| <i>circTOP1</i> | miR-4668-3p           | 1 |
| <i>circTOP1</i> | miR-4670-3p           | 2 |
| <i>circTOP1</i> | miR-4674              | 1 |
| <i>circTOP1</i> | miR-4677-5p           | 2 |
| <i>circTOP1</i> | miR-4680-5p           | 1 |

|                 |                     |   |
|-----------------|---------------------|---|
| <i>circTOP1</i> | miR-4683            | 1 |
| <i>circTOP1</i> | miR-4689/6858-5p    | 1 |
| <i>circTOP1</i> | miR-4690-5p         | 1 |
| <i>circTOP1</i> | miR-4691-3p         | 2 |
| <i>circTOP1</i> | miR-4695-5p         | 3 |
| <i>circTOP1</i> | miR-4699-5p         | 1 |
| <i>circTOP1</i> | miR-4705            | 1 |
| <i>circTOP1</i> | miR-4708-5p         | 1 |
| <i>circTOP1</i> | miR-4711-5p         | 1 |
| <i>circTOP1</i> | miR-4724-5p         | 1 |
| <i>circTOP1</i> | miR-4727-5p         | 1 |
| <i>circTOP1</i> | miR-4733-5p         | 1 |
| <i>circTOP1</i> | miR-4739            | 1 |
| <i>circTOP1</i> | miR-4742-3p         | 1 |
| <i>circTOP1</i> | miR-4743-3p         | 1 |
| <i>circTOP1</i> | miR-4750-5p         | 1 |
| <i>circTOP1</i> | miR-4753-3p         | 4 |
| <i>circTOP1</i> | miR-4758-3p         | 1 |
| <i>circTOP1</i> | miR-4764-5p         | 1 |
| <i>circTOP1</i> | miR-4766-3p         | 1 |
| <i>circTOP1</i> | miR-4768-3p         | 1 |
| <i>circTOP1</i> | miR-4768-5p/6833-3p | 4 |
| <i>circTOP1</i> | miR-4775            | 1 |
| <i>circTOP1</i> | miR-4776-5p         | 1 |
| <i>circTOP1</i> | miR-4778-3p         | 2 |
| <i>circTOP1</i> | miR-4778-5p         | 1 |
| <i>circTOP1</i> | miR-4779            | 3 |
| <i>circTOP1</i> | miR-4781-3p         | 2 |
| <i>circTOP1</i> | miR-4782-5p/5706    | 2 |
| <i>circTOP1</i> | miR-4793-3p         | 1 |
| <i>circTOP1</i> | miR-4793-5p         | 1 |
| <i>circTOP1</i> | miR-4795-3p         | 1 |
| <i>circTOP1</i> | miR-4797-5p         | 3 |
| <i>circTOP1</i> | miR-4802-3p         | 1 |
| <i>circTOP1</i> | miR-4802-5p         | 1 |
| <i>circTOP1</i> | miR-485-5p          | 2 |
| <i>circTOP1</i> | miR-486-3p          | 1 |
| <i>circTOP1</i> | miR-486-5p          | 2 |

|                 |                             |   |
|-----------------|-----------------------------|---|
| <i>circTOP1</i> | miR-487a-5p/487b-5p         | 1 |
| <i>circTOP1</i> | miR-488-3p                  | 1 |
| <i>circTOP1</i> | miR-489-3p                  | 2 |
| <i>circTOP1</i> | miR-491-5p                  | 1 |
| <i>circTOP1</i> | miR-492                     | 1 |
| <i>circTOP1</i> | miR-493-5p                  | 1 |
| <i>circTOP1</i> | miR-495-5p                  | 1 |
| <i>circTOP1</i> | miR-5001-3p                 | 1 |
| <i>circTOP1</i> | miR-5002-5p                 | 1 |
| <i>circTOP1</i> | miR-5004-3p                 | 2 |
| <i>circTOP1</i> | miR-5007-3p                 | 1 |
| <i>circTOP1</i> | miR-5009-3p                 | 1 |
| <i>circTOP1</i> | miR-500a-5p                 | 2 |
| <i>circTOP1</i> | miR-501-5p                  | 3 |
| <i>circTOP1</i> | miR-5010-3p                 | 1 |
| <i>circTOP1</i> | miR-502-5p                  | 2 |
| <i>circTOP1</i> | miR-507/557                 | 1 |
| <i>circTOP1</i> | miR-5089-3p                 | 1 |
| <i>circTOP1</i> | miR-5093                    | 2 |
| <i>circTOP1</i> | miR-510-3p                  | 1 |
| <i>circTOP1</i> | miR-511-5p                  | 1 |
| <i>circTOP1</i> | miR-512-3p                  | 1 |
| <i>circTOP1</i> | miR-513a-3p/513c-3p/3606-3p | 2 |
| <i>circTOP1</i> | miR-513b-5p                 | 3 |
| <i>circTOP1</i> | miR-514a-3p                 | 1 |
| <i>circTOP1</i> | miR-515-5p/519e-5p          | 2 |
| <i>circTOP1</i> | miR-516a-3p/516b-3p/7162-5p | 1 |
| <i>circTOP1</i> | miR-516b-5p                 | 2 |
| <i>circTOP1</i> | miR-518a-5p/527             | 1 |
| <i>circTOP1</i> | miR-518c-5p                 | 2 |
| <i>circTOP1</i> | miR-5191                    | 2 |
| <i>circTOP1</i> | miR-5196-3p                 | 1 |
| <i>circTOP1</i> | miR-5197-3p                 | 2 |
| <i>circTOP1</i> | miR-520f-5p                 | 1 |
| <i>circTOP1</i> | miR-520g-3p                 | 2 |
| <i>circTOP1</i> | miR-525-5p                  | 3 |
| <i>circTOP1</i> | miR-526b-5p                 | 2 |
| <i>circTOP1</i> | miR-532-5p                  | 1 |

|                 |                                                                  |   |
|-----------------|------------------------------------------------------------------|---|
| <i>circTOP1</i> | miR-545-5p                                                       | 2 |
| <i>circTOP1</i> | miR-548ac/548bb-3p/548d-3p/548h-3p/548z                          |   |
| <i>circTOP1</i> | miR-548ah-5p/3609                                                | 2 |
| <i>circTOP1</i> | miR-548ap-3p/548aa/548t-3p                                       | 1 |
| <i>circTOP1</i> | miR-548aq-3p/548am-3p/548aj-3p/548ah-3p/548ae-3p/548j-3p/548x-3p |   |
| <i>circTOP1</i> | miR-548as-3p                                                     | 1 |
| <i>circTOP1</i> | miR-548at-5p                                                     | 1 |
| <i>circTOP1</i> | miR-548av-3p                                                     | 1 |
| <i>circTOP1</i> | miR-548av-5p/548k/8054                                           | 1 |
| <i>circTOP1</i> | miR-548aw                                                        | 1 |
| <i>circTOP1</i> | miR-548ay-3p/548at-3p                                            | 1 |
| <i>circTOP1</i> | miR-548ay-5p/548au-5p/548as-5p/548ar-5p/548aq-5p/548ap-5p/548am- |   |
| <i>circTOP1</i> | miR-548az-3p/548ar-3p/548a-3p/548e-3p/548f-3p                    |   |
| <i>circTOP1</i> | miR-548az-5p/548t-5p                                             | 1 |
| <i>circTOP1</i> | miR-548b-3p                                                      | 2 |
| <i>circTOP1</i> | miR-548c-3p                                                      | 1 |
| <i>circTOP1</i> | miR-548l                                                         | 1 |
| <i>circTOP1</i> | miR-548m                                                         | 1 |
| <i>circTOP1</i> | miR-548n                                                         | 1 |
| <i>circTOP1</i> | miR-548p                                                         | 1 |
| <i>circTOP1</i> | miR-548s                                                         | 2 |
| <i>circTOP1</i> | miR-548v                                                         | 1 |
| <i>circTOP1</i> | miR-551b-5p                                                      | 1 |
| <i>circTOP1</i> | miR-552-3p                                                       | 1 |
| <i>circTOP1</i> | miR-555                                                          | 1 |
| <i>circTOP1</i> | miR-556-5p                                                       | 1 |
| <i>circTOP1</i> | miR-5571-5p                                                      | 2 |
| <i>circTOP1</i> | miR-5572                                                         | 2 |
| <i>circTOP1</i> | miR-5582-3p                                                      | 2 |
| <i>circTOP1</i> | miR-5583-3p                                                      | 1 |
| <i>circTOP1</i> | miR-5586-3p                                                      | 1 |
| <i>circTOP1</i> | miR-5586-5p                                                      | 1 |
| <i>circTOP1</i> | miR-5590-5p                                                      | 1 |
| <i>circTOP1</i> | miR-561-3p                                                       | 1 |
| <i>circTOP1</i> | miR-5680                                                         | 1 |
| <i>circTOP1</i> | miR-5684                                                         | 1 |
| <i>circTOP1</i> | miR-569                                                          | 1 |
| <i>circTOP1</i> | miR-5692a                                                        | 2 |

|                 |                                      |   |
|-----------------|--------------------------------------|---|
| <i>circTOP1</i> | miR-5692bc                           | 3 |
| <i>circTOP1</i> | miR-5694                             | 1 |
| <i>circTOP1</i> | miR-5696                             | 1 |
| <i>circTOP1</i> | miR-5697                             | 2 |
| <i>circTOP1</i> | miR-5699-5p                          | 1 |
| <i>circTOP1</i> | miR-573/3616-5p                      | 2 |
| <i>circTOP1</i> | miR-579-3p                           | 1 |
| <i>circTOP1</i> | miR-580-3p                           | 1 |
| <i>circTOP1</i> | miR-580-5p                           | 1 |
| <i>circTOP1</i> | miR-582-5p                           | 1 |
| <i>circTOP1</i> | miR-583                              | 1 |
| <i>circTOP1</i> | miR-584-5p                           | 2 |
| <i>circTOP1</i> | miR-588                              | 2 |
| <i>circTOP1</i> | miR-589-5p                           | 1 |
| <i>circTOP1</i> | miR-590-3p                           | 3 |
| <i>circTOP1</i> | miR-592                              | 1 |
| <i>circTOP1</i> | miR-593-3p                           | 1 |
| <i>circTOP1</i> | miR-595                              | 1 |
| <i>circTOP1</i> | miR-596                              | 1 |
| <i>circTOP1</i> | miR-597-5p                           | 1 |
| <i>circTOP1</i> | miR-599                              | 1 |
| <i>circTOP1</i> | miR-605-5p                           | 1 |
| <i>circTOP1</i> | miR-6071                             | 1 |
| <i>circTOP1</i> | miR-6074                             | 3 |
| <i>circTOP1</i> | miR-6076/6797-3p                     | 2 |
| <i>circTOP1</i> | miR-6077                             | 2 |
| <i>circTOP1</i> | miR-6079                             | 2 |
| <i>circTOP1</i> | miR-608/4651                         | 1 |
| <i>circTOP1</i> | miR-6083                             | 1 |
| <i>circTOP1</i> | miR-610                              | 1 |
| <i>circTOP1</i> | miR-611/3131                         | 1 |
| <i>circTOP1</i> | miR-612/1285-3p/3187-5p/5189-5p/6860 | 1 |
| <i>circTOP1</i> | miR-6124                             | 1 |
| <i>circTOP1</i> | miR-6128                             | 3 |
| <i>circTOP1</i> | miR-6132/6836-5p                     | 1 |
| <i>circTOP1</i> | miR-615-3p                           | 1 |
| <i>circTOP1</i> | miR-616-3p                           | 1 |
| <i>circTOP1</i> | miR-6165                             | 1 |

|                 |                             |   |
|-----------------|-----------------------------|---|
| <i>circTOP1</i> | miR-617                     | 2 |
| <i>circTOP1</i> | miR-618                     | 2 |
| <i>circTOP1</i> | miR-622                     | 2 |
| <i>circTOP1</i> | miR-624-5p                  | 1 |
| <i>circTOP1</i> | miR-625-3p                  | 1 |
| <i>circTOP1</i> | miR-629-3p                  | 3 |
| <i>circTOP1</i> | miR-634                     | 2 |
| <i>circTOP1</i> | miR-635/6774-5p             | 1 |
| <i>circTOP1</i> | miR-636                     | 1 |
| <i>circTOP1</i> | miR-647                     | 1 |
| <i>circTOP1</i> | miR-648                     | 1 |
| <i>circTOP1</i> | miR-6500-3p                 | 1 |
| <i>circTOP1</i> | miR-6501-3p                 | 2 |
| <i>circTOP1</i> | miR-6501-5p                 | 1 |
| <i>circTOP1</i> | miR-6505-3p                 | 2 |
| <i>circTOP1</i> | miR-6507-3p                 | 1 |
| <i>circTOP1</i> | miR-6509-3p                 | 3 |
| <i>circTOP1</i> | miR-6509-5p                 | 2 |
| <i>circTOP1</i> | miR-651-3p                  | 3 |
| <i>circTOP1</i> | miR-6510-5p                 | 1 |
| <i>circTOP1</i> | miR-6514-5p                 | 1 |
| <i>circTOP1</i> | miR-6515-3p                 | 3 |
| <i>circTOP1</i> | miR-6515-5p                 | 2 |
| <i>circTOP1</i> | miR-653-3p                  | 1 |
| <i>circTOP1</i> | miR-654-5p                  | 1 |
| <i>circTOP1</i> | miR-655-5p                  | 1 |
| <i>circTOP1</i> | miR-656-3p                  | 1 |
| <i>circTOP1</i> | miR-656-5p                  | 1 |
| <i>circTOP1</i> | miR-659-5p                  | 1 |
| <i>circTOP1</i> | miR-664a-3p                 | 1 |
| <i>circTOP1</i> | miR-664a-5p/4794            | 1 |
| <i>circTOP1</i> | miR-665                     | 1 |
| <i>circTOP1</i> | miR-668-3p                  | 1 |
| <i>circTOP1</i> | miR-670-3p                  | 1 |
| <i>circTOP1</i> | miR-6726-3p                 | 1 |
| <i>circTOP1</i> | miR-6728-3p                 | 1 |
| <i>circTOP1</i> | miR-6729-3p                 | 1 |
| <i>circTOP1</i> | miR-6737-5p/6812-5p/6819-5p | 1 |

|                 |                       |   |
|-----------------|-----------------------|---|
| <i>circTOP1</i> | miR-6739-3p           | 1 |
| <i>circTOP1</i> | miR-6742-5p           | 1 |
| <i>circTOP1</i> | miR-6744-5p           | 1 |
| <i>circTOP1</i> | miR-6747-5p           | 1 |
| <i>circTOP1</i> | miR-675-3p            | 1 |
| <i>circTOP1</i> | miR-6753-3p/7107-3p   | 1 |
| <i>circTOP1</i> | miR-6756-5p/6766-5p   | 1 |
| <i>circTOP1</i> | miR-6759-3p           | 1 |
| <i>circTOP1</i> | miR-6759-5p           | 1 |
| <i>circTOP1</i> | miR-676-3p            | 2 |
| <i>circTOP1</i> | miR-676-5p            | 2 |
| <i>circTOP1</i> | miR-6760-3p           | 1 |
| <i>circTOP1</i> | miR-6760-5p           | 1 |
| <i>circTOP1</i> | miR-6764-3p/6824-3p   | 2 |
| <i>circTOP1</i> | miR-6769a-5p/6769b-5p | 1 |
| <i>circTOP1</i> | miR-6770-5p           | 2 |
| <i>circTOP1</i> | miR-6776-5p           | 1 |
| <i>circTOP1</i> | miR-6780a-3p          | 3 |
| <i>circTOP1</i> | miR-6782-3p           | 2 |
| <i>circTOP1</i> | miR-6787-3p           | 1 |
| <i>circTOP1</i> | miR-6792-5p           | 1 |
| <i>circTOP1</i> | miR-6793-3p           | 1 |
| <i>circTOP1</i> | miR-6796-5p           | 1 |
| <i>circTOP1</i> | miR-6799-5p           | 1 |
| <i>circTOP1</i> | miR-6809-3p           | 4 |
| <i>circTOP1</i> | miR-6811-3p           | 1 |
| <i>circTOP1</i> | miR-6813-3p           | 5 |
| <i>circTOP1</i> | miR-6815-5p/6865-5p   | 1 |
| <i>circTOP1</i> | miR-6817-3p           | 1 |
| <i>circTOP1</i> | miR-6822-3p           | 1 |
| <i>circTOP1</i> | miR-6828-3p           | 1 |
| <i>circTOP1</i> | miR-6830-3p           | 2 |
| <i>circTOP1</i> | miR-6834-3p           | 2 |
| <i>circTOP1</i> | miR-6841-3p           | 1 |
| <i>circTOP1</i> | miR-6842-3p           | 1 |
| <i>circTOP1</i> | miR-6844              | 3 |
| <i>circTOP1</i> | miR-6847-3p           | 3 |
| <i>circTOP1</i> | miR-6847-5p           | 1 |

|                 |             |   |
|-----------------|-------------|---|
| <i>circTOP1</i> | miR-6849-3p | 2 |
| <i>circTOP1</i> | miR-6861-3p | 1 |
| <i>circTOP1</i> | miR-6861-5p | 1 |
| <i>circTOP1</i> | miR-6868-3p | 2 |
| <i>circTOP1</i> | miR-6869-3p | 1 |
| <i>circTOP1</i> | miR-6870-3p | 2 |
| <i>circTOP1</i> | miR-6871-3p | 1 |
| <i>circTOP1</i> | miR-6875-3p | 1 |
| <i>circTOP1</i> | miR-6880-5p | 1 |
| <i>circTOP1</i> | miR-6881-3p | 3 |
| <i>circTOP1</i> | miR-6884-3p | 1 |
| <i>circTOP1</i> | miR-6885-3p | 2 |
| <i>circTOP1</i> | miR-6888-3p | 2 |
| <i>circTOP1</i> | miR-6888-5p | 2 |
| <i>circTOP1</i> | miR-6894-5p | 4 |
| <i>circTOP1</i> | miR-6895-3p | 1 |
| <i>circTOP1</i> | miR-7-5p    | 2 |
| <i>circTOP1</i> | miR-708-3p  | 1 |
| <i>circTOP1</i> | miR-7106-5p | 1 |
| <i>circTOP1</i> | miR-7110-3p | 1 |
| <i>circTOP1</i> | miR-7111-3p | 3 |
| <i>circTOP1</i> | miR-7112-3p | 1 |
| <i>circTOP1</i> | miR-7112-5p | 1 |
| <i>circTOP1</i> | miR-7114-5p | 1 |
| <i>circTOP1</i> | miR-7151-5p | 2 |
| <i>circTOP1</i> | miR-7152-5p | 1 |
| <i>circTOP1</i> | miR-7154-3p | 4 |
| <i>circTOP1</i> | miR-7154-5p | 1 |
| <i>circTOP1</i> | miR-7158-3p | 1 |
| <i>circTOP1</i> | miR-7161-3p | 2 |
| <i>circTOP1</i> | miR-759     | 2 |
| <i>circTOP1</i> | miR-760     | 1 |
| <i>circTOP1</i> | miR-765     | 4 |
| <i>circTOP1</i> | miR-766-3p  | 2 |
| <i>circTOP1</i> | miR-766-5p  | 4 |
| <i>circTOP1</i> | miR-767-5p  | 1 |
| <i>circTOP1</i> | miR-770-5p  | 1 |
| <i>circTOP1</i> | miR-7702    | 1 |



|                 |                          |   |
|-----------------|--------------------------|---|
| <i>circTOP1</i> | miR-7843-3p              | 1 |
| <i>circTOP1</i> | miR-7849-3p              | 2 |
| <i>circTOP1</i> | miR-7850-5p              | 1 |
| <i>circTOP1</i> | miR-7855-5p              | 3 |
| <i>circTOP1</i> | miR-7856-5p              | 1 |
| <i>circTOP1</i> | miR-7977                 | 1 |
| <i>circTOP1</i> | miR-802                  | 2 |
| <i>circTOP1</i> | miR-8055                 | 1 |
| <i>circTOP1</i> | miR-8057                 | 1 |
| <i>circTOP1</i> | miR-8071                 | 1 |
| <i>circTOP1</i> | miR-8076                 | 1 |
| <i>circTOP1</i> | miR-8084                 | 2 |
| <i>circTOP1</i> | miR-873-5p.1             | 1 |
| <i>circTOP1</i> | miR-875-3p               | 2 |
| <i>circTOP1</i> | miR-876-3p               | 1 |
| <i>circTOP1</i> | miR-888-3p               | 1 |
| <i>circTOP1</i> | miR-889-3p               | 2 |
| <i>circTOP1</i> | miR-892a                 | 1 |
| <i>circTOP1</i> | miR-9-5p                 | 1 |
| <i>circTOP1</i> | miR-921                  | 1 |
| <i>circTOP1</i> | miR-92a-1-5p             | 1 |
| <i>circTOP1</i> | miR-92a-2-5p             | 1 |
| <i>circTOP1</i> | miR-935                  | 1 |
| <i>circTOP1</i> | miR-936                  | 1 |
| <i>circTOP1</i> | miR-942-5p               | 4 |
| <i>circTOP1</i> | miR-943                  | 1 |
| <i>circTOP1</i> | miR-944                  | 1 |
| <i>circTOP1</i> | miR-96-3p                | 2 |
| <i>circTOP1</i> | miR-96-5p/1271-5p        | 3 |
| <i>circTOP1</i> | miR-100-3p               | 1 |
| <i>circTOP1</i> | miR-103-3p/107           | 1 |
| <i>circTOP1</i> | miR-1180-3p              | 1 |
| <i>circTOP1</i> | miR-1200                 | 1 |
| <i>circTOP1</i> | miR-1262/4701-3p/6736-5p | 1 |
| <i>circTOP1</i> | miR-1269                 | 1 |
| <i>circTOP1</i> | miR-127-3p               | 1 |
| <i>circTOP1</i> | miR-128-3p               | 1 |
| <i>circTOP1</i> | miR-1289                 | 1 |

|                 |                                      |   |
|-----------------|--------------------------------------|---|
| <i>circTOP1</i> | miR-138-1-3p                         | 1 |
| <i>circTOP1</i> | miR-140-3p.1                         | 1 |
| <i>circTOP1</i> | miR-140-3p.2                         | 1 |
| <i>circTOP1</i> | miR-15-5p/16-5p/195-5p/424-5p/497-5p | 2 |
| <i>circTOP1</i> | miR-182-3p                           | 1 |
| <i>circTOP1</i> | miR-187-5p                           | 1 |
| <i>circTOP1</i> | miR-214-3p/3619-5p                   | 1 |
| <i>circTOP1</i> | miR-218-1-3p                         | 1 |
| <i>circTOP1</i> | miR-218-2-3p                         | 1 |
| <i>circTOP1</i> | miR-218-5p                           | 1 |
| <i>circTOP1</i> | miR-224-5p                           | 1 |
| <i>circTOP1</i> | miR-23-5p                            | 1 |
| <i>circTOP1</i> | miR-2355-3p                          | 1 |
| <i>circTOP1</i> | miR-3152-5p                          | 1 |
| <i>circTOP1</i> | miR-3157-5p                          | 1 |
| <i>circTOP1</i> | miR-3158-3p                          | 1 |
| <i>circTOP1</i> | miR-3174                             | 1 |
| <i>circTOP1</i> | miR-3192-3p                          | 1 |
| <i>circTOP1</i> | miR-3200-5p                          | 1 |
| <i>circTOP1</i> | miR-3649                             | 1 |
| <i>circTOP1</i> | miR-3655                             | 2 |
| <i>circTOP1</i> | miR-3657                             | 1 |
| <i>circTOP1</i> | miR-3664-5p                          | 1 |
| <i>circTOP1</i> | miR-3667-3p                          | 2 |
| <i>circTOP1</i> | miR-370-3p                           | 1 |
| <i>circTOP1</i> | miR-376a-2-5p                        | 1 |
| <i>circTOP1</i> | miR-376a-5p                          | 1 |
| <i>circTOP1</i> | miR-378a-5p                          | 1 |
| <i>circTOP1</i> | miR-3918                             | 1 |
| <i>circTOP1</i> | miR-3928-3p                          | 1 |
| <i>circTOP1</i> | miR-3935                             | 1 |
| <i>circTOP1</i> | miR-421                              | 1 |
| <i>circTOP1</i> | miR-4274                             | 1 |
| <i>circTOP1</i> | miR-4294                             | 1 |
| <i>circTOP1</i> | miR-4302                             | 1 |
| <i>circTOP1</i> | miR-4317                             | 1 |
| <i>circTOP1</i> | miR-4330                             | 1 |
| <i>circTOP1</i> | miR-4446-3p                          | 1 |

|                 |                     |   |
|-----------------|---------------------|---|
| <i>circTOP1</i> | miR-4453/4538       | 1 |
| <i>circTOP1</i> | miR-4455            | 1 |
| <i>circTOP1</i> | miR-4476/6876-5p    | 1 |
| <i>circTOP1</i> | miR-4519            | 1 |
| <i>circTOP1</i> | miR-4520-2-3p       | 1 |
| <i>circTOP1</i> | miR-4529-3p         | 1 |
| <i>circTOP1</i> | miR-455-5p          | 1 |
| <i>circTOP1</i> | miR-4632-3p         | 1 |
| <i>circTOP1</i> | miR-4643            | 1 |
| <i>circTOP1</i> | miR-4646-3p         | 1 |
| <i>circTOP1</i> | miR-4664-3p         | 1 |
| <i>circTOP1</i> | miR-4669            | 1 |
| <i>circTOP1</i> | miR-4690-3p/5685    | 1 |
| <i>circTOP1</i> | miR-4691-5p/6792-3p | 1 |
| <i>circTOP1</i> | miR-4709-5p         | 1 |
| <i>circTOP1</i> | miR-4714-5p         | 1 |
| <i>circTOP1</i> | miR-4740-3p         | 1 |
| <i>circTOP1</i> | miR-4750-3p         | 1 |
| <i>circTOP1</i> | miR-4763-5p         | 1 |
| <i>circTOP1</i> | miR-4774-3p         | 1 |
| <i>circTOP1</i> | miR-4789-3p         | 1 |
| <i>circTOP1</i> | miR-4795-5p         | 1 |
| <i>circTOP1</i> | miR-5009-5p/8058    | 1 |
| <i>circTOP1</i> | miR-503-5p          | 2 |
| <i>circTOP1</i> | miR-505-3p.2        | 1 |
| <i>circTOP1</i> | miR-5088-5p         | 1 |
| <i>circTOP1</i> | miR-5095/7151-3p    | 1 |
| <i>circTOP1</i> | miR-513c-5p/514b-5p | 1 |
| <i>circTOP1</i> | miR-514a-5p         | 1 |
| <i>circTOP1</i> | miR-516a-5p         | 1 |
| <i>circTOP1</i> | miR-5193            | 1 |
| <i>circTOP1</i> | miR-545-3p          | 1 |
| <i>circTOP1</i> | miR-548ao-5p/548ax  | 1 |
| <i>circTOP1</i> | miR-5580-3p         | 1 |
| <i>circTOP1</i> | miR-5585-5p         | 1 |
| <i>circTOP1</i> | miR-5691            | 1 |
| <i>circTOP1</i> | miR-572             | 1 |
| <i>circTOP1</i> | miR-591             | 1 |

|                  |                     |   |
|------------------|---------------------|---|
| <i>circTOP1</i>  | miR-609             | 1 |
| <i>circTOP1</i>  | miR-627-3p          | 1 |
| <i>circTOP1</i>  | miR-646             | 2 |
| <i>circTOP1</i>  | miR-6514-3p         | 1 |
| <i>circTOP1</i>  | miR-660-3p          | 1 |
| <i>circTOP1</i>  | miR-664b-5p         | 1 |
| <i>circTOP1</i>  | miR-6715b-3p        | 1 |
| <i>circTOP1</i>  | miR-6733-3p         | 1 |
| <i>circTOP1</i>  | miR-6734-3p         | 2 |
| <i>circTOP1</i>  | miR-6736-3p         | 1 |
| <i>circTOP1</i>  | miR-6740-3p         | 1 |
| <i>circTOP1</i>  | miR-6741-5p         | 1 |
| <i>circTOP1</i>  | miR-6746-3p         | 1 |
| <i>circTOP1</i>  | miR-6749-3p         | 1 |
| <i>circTOP1</i>  | miR-6772-3p         | 1 |
| <i>circTOP1</i>  | miR-6772-5p         | 1 |
| <i>circTOP1</i>  | miR-6838-3p         | 1 |
| <i>circTOP1</i>  | miR-6894-3p         | 1 |
| <i>circTOP1</i>  | miR-7159-5p         | 1 |
| <i>circTOP1</i>  | miR-764             | 1 |
| <i>circTOP1</i>  | miR-767-3p          | 1 |
| <i>circTOP1</i>  | miR-7845-5p         | 1 |
| <i>circTOP1</i>  | miR-922             | 1 |
| <i>circTTLL7</i> | miR-1-3p/206        | 3 |
| <i>circTTLL7</i> | miR-101-3p.1        | 2 |
| <i>circTTLL7</i> | miR-101-3p.2        | 1 |
| <i>circTTLL7</i> | miR-101-5p          | 3 |
| <i>circTTLL7</i> | miR-103-3p/107      | 5 |
| <i>circTTLL7</i> | miR-103a-2-5p       | 1 |
| <i>circTTLL7</i> | miR-105-5p          | 1 |
| <i>circTTLL7</i> | miR-1178-3p         | 2 |
| <i>circTTLL7</i> | miR-1179            | 2 |
| <i>circTTLL7</i> | miR-1184            | 3 |
| <i>circTTLL7</i> | miR-1204            | 1 |
| <i>circTTLL7</i> | miR-1205            | 3 |
| <i>circTTLL7</i> | miR-1207-3p         | 1 |
| <i>circTTLL7</i> | miR-1207-5p/4763-3p | 1 |
| <i>circTTLL7</i> | miR-1233-5p/6778-5p | 2 |

|                  |                     |   |
|------------------|---------------------|---|
| <i>circTTLL7</i> | miR-1236-3p         | 2 |
| <i>circTTLL7</i> | miR-1236-5p         | 1 |
| <i>circTTLL7</i> | miR-1238-3p         | 2 |
| <i>circTTLL7</i> | miR-124-3p.1        | 3 |
| <i>circTTLL7</i> | miR-1243            | 1 |
| <i>circTTLL7</i> | miR-1245b-3p        | 3 |
| <i>circTTLL7</i> | miR-1247-3p         | 1 |
| <i>circTTLL7</i> | miR-1249-5p/6797-5p | 2 |
| <i>circTTLL7</i> | miR-1250-3p         | 2 |
| <i>circTTLL7</i> | miR-1252-3p         | 4 |
| <i>circTTLL7</i> | miR-1255b-2-3p      | 1 |
| <i>circTTLL7</i> | miR-125a-3p         | 1 |
| <i>circTTLL7</i> | miR-125b-1-3p       | 1 |
| <i>circTTLL7</i> | miR-125b-2-3p       | 1 |
| <i>circTTLL7</i> | miR-1269            | 1 |
| <i>circTTLL7</i> | miR-1270            | 2 |
| <i>circTTLL7</i> | miR-1272            | 6 |
| <i>circTTLL7</i> | miR-1273h-3p        | 2 |
| <i>circTTLL7</i> | miR-1276            | 3 |
| <i>circTTLL7</i> | miR-1278            | 4 |
| <i>circTTLL7</i> | miR-1279            | 1 |
| <i>circTTLL7</i> | miR-128-3p          | 2 |
| <i>circTTLL7</i> | miR-1283            | 1 |
| <i>circTTLL7</i> | miR-1288-5p         | 1 |
| <i>circTTLL7</i> | miR-1289            | 1 |
| <i>circTTLL7</i> | miR-1290            | 1 |
| <i>circTTLL7</i> | miR-1292-5p         | 1 |
| <i>circTTLL7</i> | miR-1296-3p         | 2 |
| <i>circTTLL7</i> | miR-1298-3p         | 1 |
| <i>circTTLL7</i> | miR-1299            | 6 |
| <i>circTTLL7</i> | miR-1301-3p         | 2 |
| <i>circTTLL7</i> | miR-1301-5p/6502-5p | 2 |
| <i>circTTLL7</i> | miR-1305            | 2 |
| <i>circTTLL7</i> | miR-1322            | 6 |
| <i>circTTLL7</i> | miR-136-5p          | 1 |
| <i>circTTLL7</i> | miR-139-3p          | 1 |
| <i>circTTLL7</i> | miR-141-5p          | 1 |
| <i>circTTLL7</i> | miR-142-5p          | 1 |

|                  |                                      |   |
|------------------|--------------------------------------|---|
| <i>circTTLL7</i> | miR-144-3p                           | 2 |
| <i>circTTLL7</i> | miR-144-5p                           | 1 |
| <i>circTTLL7</i> | miR-145-5p                           | 1 |
| <i>circTTLL7</i> | miR-146a-3p                          | 3 |
| <i>circTTLL7</i> | miR-1470                             | 2 |
| <i>circTTLL7</i> | miR-148a-5p                          | 2 |
| <i>circTTLL7</i> | miR-148b-5p/6874-3p                  | 3 |
| <i>circTTLL7</i> | miR-149-3p/4728-5p/6785-5p/6883-5p   | 2 |
| <i>circTTLL7</i> | miR-15-5p/16-5p/195-5p/424-5p/497-5p | 5 |
| <i>circTTLL7</i> | miR-1537-3p                          | 2 |
| <i>circTTLL7</i> | miR-154-3p/487-3p                    | 1 |
| <i>circTTLL7</i> | miR-155-3p                           | 2 |
| <i>circTTLL7</i> | miR-15b-3p                           | 2 |
| <i>circTTLL7</i> | miR-17-3p                            | 3 |
| <i>circTTLL7</i> | miR-17-5p/20-5p/93-5p/106-5p/519-3p  | 2 |
| <i>circTTLL7</i> | miR-18-5p                            | 1 |
| <i>circTTLL7</i> | miR-181-5p                           | 2 |
| <i>circTTLL7</i> | miR-1825                             | 1 |
| <i>circTTLL7</i> | miR-1827                             | 3 |
| <i>circTTLL7</i> | miR-183-3p                           | 1 |
| <i>circTTLL7</i> | miR-183-5p.2                         | 1 |
| <i>circTTLL7</i> | miR-185-3p                           | 2 |
| <i>circTTLL7</i> | miR-185-5p                           | 1 |
| <i>circTTLL7</i> | miR-186-5p                           | 7 |
| <i>circTTLL7</i> | miR-18a-3p                           | 1 |
| <i>circTTLL7</i> | miR-19-5p                            | 1 |
| <i>circTTLL7</i> | miR-1910-3p/6511a-5p                 | 3 |
| <i>circTTLL7</i> | miR-1911-5p                          | 4 |
| <i>circTTLL7</i> | miR-1915-3p/6764-5p                  | 2 |
| <i>circTTLL7</i> | miR-193-3p                           | 1 |
| <i>circTTLL7</i> | miR-193b-5p                          | 2 |
| <i>circTTLL7</i> | miR-194-3p                           | 1 |
| <i>circTTLL7</i> | miR-196a-3p                          | 2 |
| <i>circTTLL7</i> | miR-196b-3p                          | 2 |
| <i>circTTLL7</i> | miR-1973                             | 2 |
| <i>circTTLL7</i> | miR-199-5p                           | 1 |
| <i>circTTLL7</i> | miR-200ab-5p                         | 1 |
| <i>circTTLL7</i> | miR-202-5p                           | 1 |

|                  |                                 |   |
|------------------|---------------------------------|---|
| <i>circTTLL7</i> | miR-2052                        | 1 |
| <i>circTTLL7</i> | miR-2053                        | 2 |
| <i>circTTLL7</i> | miR-208-3p                      | 2 |
| <i>circTTLL7</i> | miR-20a-3p                      | 1 |
| <i>circTTLL7</i> | miR-2110                        | 3 |
| <i>circTTLL7</i> | miR-2115-3p                     | 2 |
| <i>circTTLL7</i> | miR-2115-5p                     | 2 |
| <i>circTTLL7</i> | miR-2116-5p                     | 3 |
| <i>circTTLL7</i> | miR-2117                        | 2 |
| <i>circTTLL7</i> | miR-214-3p/3619-5p              | 7 |
| <i>circTTLL7</i> | miR-217                         | 3 |
| <i>circTTLL7</i> | miR-22-3p                       | 1 |
| <i>circTTLL7</i> | miR-22-5p                       | 3 |
| <i>circTTLL7</i> | miR-223-5p                      | 1 |
| <i>circTTLL7</i> | miR-224-5p                      | 4 |
| <i>circTTLL7</i> | miR-2277-3p                     | 2 |
| <i>circTTLL7</i> | miR-2278                        | 1 |
| <i>circTTLL7</i> | miR-23-3p                       | 2 |
| <i>circTTLL7</i> | miR-24-3p                       | 2 |
| <i>circTTLL7</i> | miR-26-5p                       | 2 |
| <i>circTTLL7</i> | miR-2682-3p/6781-3p             | 2 |
| <i>circTTLL7</i> | miR-27-3p                       | 2 |
| <i>circTTLL7</i> | miR-27a-5p                      | 1 |
| <i>circTTLL7</i> | miR-296-3p                      | 1 |
| <i>circTTLL7</i> | miR-297                         | 2 |
| <i>circTTLL7</i> | miR-298                         | 2 |
| <i>circTTLL7</i> | miR-299-3p                      | 1 |
| <i>circTTLL7</i> | miR-29a-5p                      | 2 |
| <i>circTTLL7</i> | miR-29b-1-5p                    | 1 |
| <i>circTTLL7</i> | miR-30-3p                       | 3 |
| <i>circTTLL7</i> | miR-302-3p/372-3p/373-3p/520-3p | 1 |
| <i>circTTLL7</i> | miR-302a-5p                     | 3 |
| <i>circTTLL7</i> | miR-3064-5p                     | 1 |
| <i>circTTLL7</i> | miR-3065-5p                     | 1 |
| <i>circTTLL7</i> | miR-3120-3p                     | 3 |
| <i>circTTLL7</i> | miR-3123                        | 2 |
| <i>circTTLL7</i> | miR-3125/3916/6859-5p           | 2 |
| <i>circTTLL7</i> | miR-3126-3p                     | 1 |

|                  |                           |   |
|------------------|---------------------------|---|
| <i>circTTLL7</i> | miR-3128                  | 1 |
| <i>circTTLL7</i> | miR-3133                  | 7 |
| <i>circTTLL7</i> | miR-3136-3p/7155-3p       | 2 |
| <i>circTTLL7</i> | miR-3144-5p               | 1 |
| <i>circTTLL7</i> | miR-3149                  | 2 |
| <i>circTTLL7</i> | miR-3150a-3p              | 3 |
| <i>circTTLL7</i> | miR-3151-5p               | 2 |
| <i>circTTLL7</i> | miR-3152-3p               | 2 |
| <i>circTTLL7</i> | miR-3153/6733-5p/6739-5p  | 3 |
| <i>circTTLL7</i> | miR-3156-5p               | 2 |
| <i>circTTLL7</i> | miR-3157-3p               | 1 |
| <i>circTTLL7</i> | miR-3158-3p               | 2 |
| <i>circTTLL7</i> | miR-3158-5p               | 3 |
| <i>circTTLL7</i> | miR-3161                  | 1 |
| <i>circTTLL7</i> | miR-3163                  | 2 |
| <i>circTTLL7</i> | miR-3168                  | 3 |
| <i>circTTLL7</i> | miR-3174                  | 2 |
| <i>circTTLL7</i> | miR-3175                  | 3 |
| <i>circTTLL7</i> | miR-3180-5p               | 3 |
| <i>circTTLL7</i> | miR-3182                  | 6 |
| <i>circTTLL7</i> | miR-3185                  | 6 |
| <i>circTTLL7</i> | miR-3187-3p               | 1 |
| <i>circTTLL7</i> | miR-3190-3p               | 1 |
| <i>circTTLL7</i> | miR-3191-3p               | 1 |
| <i>circTTLL7</i> | miR-3191-5p               | 1 |
| <i>circTTLL7</i> | miR-3192-3p               | 2 |
| <i>circTTLL7</i> | miR-3198/4309             | 1 |
| <i>circTTLL7</i> | miR-3200-5p               | 3 |
| <i>circTTLL7</i> | miR-3202                  | 3 |
| <i>circTTLL7</i> | miR-320e                  | 2 |
| <i>circTTLL7</i> | miR-324-3p/1913           | 1 |
| <i>circTTLL7</i> | miR-326                   | 1 |
| <i>circTTLL7</i> | miR-328-3p                | 2 |
| <i>circTTLL7</i> | miR-328-5p/6885-5p        | 1 |
| <i>circTTLL7</i> | miR-330-3p.2              | 3 |
| <i>circTTLL7</i> | miR-335-3p                | 3 |
| <i>circTTLL7</i> | miR-335-5p                | 1 |
| <i>circTTLL7</i> | miR-33b-3p/515-3p/519e-3p | 1 |



|                  |                           |   |
|------------------|---------------------------|---|
| <i>circTTLL7</i> | miR-342-3p                | 2 |
| <i>circTTLL7</i> | miR-34b-5p/449c-5p        | 3 |
| <i>circTTLL7</i> | miR-3606-5p               | 1 |
| <i>circTTLL7</i> | miR-3607-3p               | 1 |
| <i>circTTLL7</i> | miR-3613-3p               | 3 |
| <i>circTTLL7</i> | miR-3616-3p               | 1 |
| <i>circTTLL7</i> | miR-3620-3p               | 2 |
| <i>circTTLL7</i> | miR-3646                  | 4 |
| <i>circTTLL7</i> | miR-3653-3p               | 4 |
| <i>circTTLL7</i> | miR-3654                  | 1 |
| <i>circTTLL7</i> | miR-3658                  | 2 |
| <i>circTTLL7</i> | miR-3662                  | 4 |
| <i>circTTLL7</i> | miR-3664-5p               | 2 |
| <i>circTTLL7</i> | miR-3665                  | 1 |
| <i>circTTLL7</i> | miR-3667-3p               | 1 |
| <i>circTTLL7</i> | miR-3667-5p               | 3 |
| <i>circTTLL7</i> | miR-3671                  | 1 |
| <i>circTTLL7</i> | miR-3675-3p               | 1 |
| <i>circTTLL7</i> | miR-3677-3p               | 1 |
| <i>circTTLL7</i> | miR-3677-5p               | 1 |
| <i>circTTLL7</i> | miR-3678-3p               | 2 |
| <i>circTTLL7</i> | miR-3682-3p               | 4 |
| <i>circTTLL7</i> | miR-3685                  | 1 |
| <i>circTTLL7</i> | miR-3686                  | 2 |
| <i>circTTLL7</i> | miR-3692-3p               | 1 |
| <i>circTTLL7</i> | miR-370-3p                | 2 |
| <i>circTTLL7</i> | miR-371-5p                | 2 |
| <i>circTTLL7</i> | miR-3714                  | 3 |
| <i>circTTLL7</i> | miR-371a-3p               | 1 |
| <i>circTTLL7</i> | miR-371b-3p               | 1 |
| <i>circTTLL7</i> | miR-371b-5p/373-5p/616-5p | 2 |
| <i>circTTLL7</i> | miR-372-5p                | 2 |
| <i>circTTLL7</i> | miR-374-5p                | 2 |
| <i>circTTLL7</i> | miR-375                   | 4 |
| <i>circTTLL7</i> | miR-376c-3p               | 1 |
| <i>circTTLL7</i> | miR-382-3p                | 1 |
| <i>circTTLL7</i> | miR-383-5p.2              | 1 |
| <i>circTTLL7</i> | miR-384                   | 1 |

|                  |                           |   |
|------------------|---------------------------|---|
| <i>circTTLL7</i> | miR-3910                  | 3 |
| <i>circTTLL7</i> | miR-3925-5p               | 2 |
| <i>circTTLL7</i> | miR-3926                  | 2 |
| <i>circTTLL7</i> | miR-3928-3p               | 2 |
| <i>circTTLL7</i> | miR-3934-5p               | 1 |
| <i>circTTLL7</i> | miR-3942-3p               | 4 |
| <i>circTTLL7</i> | miR-3973                  | 3 |
| <i>circTTLL7</i> | miR-3977                  | 2 |
| <i>circTTLL7</i> | miR-409-3p                | 1 |
| <i>circTTLL7</i> | miR-410-3p                | 1 |
| <i>circTTLL7</i> | miR-411-5p.2              | 2 |
| <i>circTTLL7</i> | miR-421                   | 2 |
| <i>circTTLL7</i> | miR-423-5p                | 1 |
| <i>circTTLL7</i> | miR-4251                  | 5 |
| <i>circTTLL7</i> | miR-4256                  | 3 |
| <i>circTTLL7</i> | miR-4258                  | 1 |
| <i>circTTLL7</i> | miR-4260                  | 1 |
| <i>circTTLL7</i> | miR-4263                  | 1 |
| <i>circTTLL7</i> | miR-4271/4725-3p/6780b-5p | 1 |
| <i>circTTLL7</i> | miR-4273/7156-5p          | 4 |
| <i>circTTLL7</i> | miR-4274                  | 4 |
| <i>circTTLL7</i> | miR-4277                  | 1 |
| <i>circTTLL7</i> | miR-4282                  | 4 |
| <i>circTTLL7</i> | miR-4284                  | 2 |
| <i>circTTLL7</i> | miR-4290                  | 1 |
| <i>circTTLL7</i> | miR-4294                  | 1 |
| <i>circTTLL7</i> | miR-4299                  | 1 |
| <i>circTTLL7</i> | miR-4307                  | 3 |
| <i>circTTLL7</i> | miR-4311                  | 3 |
| <i>circTTLL7</i> | miR-4324                  | 3 |
| <i>circTTLL7</i> | miR-4328                  | 2 |
| <i>circTTLL7</i> | miR-4329                  | 5 |
| <i>circTTLL7</i> | miR-4422                  | 3 |
| <i>circTTLL7</i> | miR-4426/4647/4662b       | 7 |
| <i>circTTLL7</i> | miR-4435                  | 1 |
| <i>circTTLL7</i> | miR-4440                  | 1 |
| <i>circTTLL7</i> | miR-4446-3p               | 2 |
| <i>circTTLL7</i> | miR-4447/4472             | 2 |

|                  |                       |   |
|------------------|-----------------------|---|
| <i>circTTLL7</i> | miR-4452              | 1 |
| <i>circTTLL7</i> | miR-4454              | 2 |
| <i>circTTLL7</i> | miR-4456              | 1 |
| <i>circTTLL7</i> | miR-4471/8059         | 1 |
| <i>circTTLL7</i> | miR-4480              | 1 |
| <i>circTTLL7</i> | miR-4482-3p           | 2 |
| <i>circTTLL7</i> | miR-4491/4657         | 1 |
| <i>circTTLL7</i> | miR-4493              | 2 |
| <i>circTTLL7</i> | miR-4496              | 4 |
| <i>circTTLL7</i> | miR-450-5p            | 2 |
| <i>circTTLL7</i> | miR-4502              | 1 |
| <i>circTTLL7</i> | miR-4504              | 4 |
| <i>circTTLL7</i> | miR-450a-2-3p         | 1 |
| <i>circTTLL7</i> | miR-451               | 2 |
| <i>circTTLL7</i> | miR-4511              | 3 |
| <i>circTTLL7</i> | miR-4519              | 4 |
| <i>circTTLL7</i> | miR-452-5p/892-3p     | 2 |
| <i>circTTLL7</i> | miR-4520-2-3p         | 2 |
| <i>circTTLL7</i> | miR-4520-3p           | 1 |
| <i>circTTLL7</i> | miR-4522              | 1 |
| <i>circTTLL7</i> | miR-4524-5p           | 3 |
| <i>circTTLL7</i> | miR-4529-3p           | 2 |
| <i>circTTLL7</i> | miR-4531              | 2 |
| <i>circTTLL7</i> | miR-4533              | 3 |
| <i>circTTLL7</i> | miR-4633-5p           | 2 |
| <i>circTTLL7</i> | miR-4635              | 1 |
| <i>circTTLL7</i> | miR-4640-3p           | 1 |
| <i>circTTLL7</i> | miR-4641              | 1 |
| <i>circTTLL7</i> | miR-4648              | 2 |
| <i>circTTLL7</i> | miR-4652-3p           | 2 |
| <i>circTTLL7</i> | miR-4652-5p           | 1 |
| <i>circTTLL7</i> | miR-4654/4769-5p      | 2 |
| <i>circTTLL7</i> | miR-4655-3p           | 1 |
| <i>circTTLL7</i> | miR-4655-5p           | 1 |
| <i>circTTLL7</i> | miR-4656              | 1 |
| <i>circTTLL7</i> | miR-4659a-3p/4659b-3p | 2 |
| <i>circTTLL7</i> | miR-4660              | 3 |
| <i>circTTLL7</i> | miR-4666a-5p          | 3 |

|                  |                                  |   |
|------------------|----------------------------------|---|
| <i>circTTLL7</i> | miR-4666b                        | 1 |
| <i>circTTLL7</i> | miR-4667-3p                      | 2 |
| <i>circTTLL7</i> | miR-4668-5p                      | 3 |
| <i>circTTLL7</i> | miR-4675/4741                    | 1 |
| <i>circTTLL7</i> | miR-4677-3p                      | 3 |
| <i>circTTLL7</i> | miR-4677-5p                      | 4 |
| <i>circTTLL7</i> | miR-4679                         | 3 |
| <i>circTTLL7</i> | miR-4683                         | 1 |
| <i>circTTLL7</i> | miR-4686                         | 2 |
| <i>circTTLL7</i> | miR-4687-3p                      | 1 |
| <i>circTTLL7</i> | miR-4691-5p/6792-3p              | 2 |
| <i>circTTLL7</i> | miR-4693-3p                      | 3 |
| <i>circTTLL7</i> | miR-4694-5p                      | 2 |
| <i>circTTLL7</i> | miR-4698                         | 3 |
| <i>circTTLL7</i> | miR-4699-5p                      | 9 |
| <i>circTTLL7</i> | miR-4704-3p                      | 1 |
| <i>circTTLL7</i> | miR-4705                         | 1 |
| <i>circTTLL7</i> | miR-4709-3p                      | 5 |
| <i>circTTLL7</i> | miR-4712-3p                      | 2 |
| <i>circTTLL7</i> | miR-4714-5p                      | 2 |
| <i>circTTLL7</i> | miR-4716-3p/6794-5p              | 2 |
| <i>circTTLL7</i> | miR-4720-5p/4799-3p/5588-5p      | 1 |
| <i>circTTLL7</i> | miR-4721                         | 1 |
| <i>circTTLL7</i> | miR-4723-5p/5698/6870-5p/7111-5p | 2 |
| <i>circTTLL7</i> | miR-4724-5p                      | 2 |
| <i>circTTLL7</i> | miR-4726-3p                      | 2 |
| <i>circTTLL7</i> | miR-4727-5p                      | 2 |
| <i>circTTLL7</i> | miR-4729                         | 1 |
| <i>circTTLL7</i> | miR-4736                         | 1 |
| <i>circTTLL7</i> | miR-4742-3p                      | 1 |
| <i>circTTLL7</i> | miR-4743-3p                      | 2 |
| <i>circTTLL7</i> | miR-4746-5p                      | 1 |
| <i>circTTLL7</i> | miR-4747-5p/5196-5p              | 2 |
| <i>circTTLL7</i> | miR-4752                         | 1 |
| <i>circTTLL7</i> | miR-4762-3p                      | 2 |
| <i>circTTLL7</i> | miR-4763-5p                      | 2 |
| <i>circTTLL7</i> | miR-4765                         | 1 |
| <i>circTTLL7</i> | miR-4766-5p                      | 2 |

|                  |                             |   |
|------------------|-----------------------------|---|
| <i>circTTLL7</i> | miR-4773                    | 4 |
| <i>circTTLL7</i> | miR-4781-3p                 | 1 |
| <i>circTTLL7</i> | miR-4782-5p/5706            | 6 |
| <i>circTTLL7</i> | miR-4785                    | 1 |
| <i>circTTLL7</i> | miR-4790-3p                 | 2 |
| <i>circTTLL7</i> | miR-4790-5p                 | 1 |
| <i>circTTLL7</i> | miR-4796-3p                 | 1 |
| <i>circTTLL7</i> | miR-491-5p                  | 2 |
| <i>circTTLL7</i> | miR-493-3p                  | 1 |
| <i>circTTLL7</i> | miR-495-3p                  | 3 |
| <i>circTTLL7</i> | miR-4999-3p                 | 3 |
| <i>circTTLL7</i> | miR-499a-5p                 | 2 |
| <i>circTTLL7</i> | miR-5001-3p                 | 2 |
| <i>circTTLL7</i> | miR-5002-5p                 | 1 |
| <i>circTTLL7</i> | miR-5007-3p                 | 1 |
| <i>circTTLL7</i> | miR-5007-5p                 | 1 |
| <i>circTTLL7</i> | miR-5009-5p/8058            | 1 |
| <i>circTTLL7</i> | miR-5010-5p                 | 2 |
| <i>circTTLL7</i> | miR-5011-3p                 | 1 |
| <i>circTTLL7</i> | miR-503-5p                  | 5 |
| <i>circTTLL7</i> | miR-504-3p                  | 1 |
| <i>circTTLL7</i> | miR-505-3p.2                | 2 |
| <i>circTTLL7</i> | miR-505-5p                  | 1 |
| <i>circTTLL7</i> | miR-506-5p                  | 2 |
| <i>circTTLL7</i> | miR-5088-5p                 | 2 |
| <i>circTTLL7</i> | miR-509-3-5p/509-5p/4418    | 3 |
| <i>circTTLL7</i> | miR-5100                    | 4 |
| <i>circTTLL7</i> | miR-513a-3p/513c-3p/3606-3p | 2 |
| <i>circTTLL7</i> | miR-513a-5p                 | 2 |
| <i>circTTLL7</i> | miR-513c-5p/514b-5p         | 4 |
| <i>circTTLL7</i> | miR-514a-5p                 | 2 |
| <i>circTTLL7</i> | miR-516a-3p/516b-3p/7162-5p | 2 |
| <i>circTTLL7</i> | miR-516b-5p                 | 6 |
| <i>circTTLL7</i> | miR-5186                    | 1 |
| <i>circTTLL7</i> | miR-5188                    | 1 |
| <i>circTTLL7</i> | miR-5189-3p                 | 1 |
| <i>circTTLL7</i> | miR-518c-5p                 | 1 |
| <i>circTTLL7</i> | miR-519-3p                  | 1 |

|                  |                                                                    |   |
|------------------|--------------------------------------------------------------------|---|
| <i>circTTLL7</i> | miR-5190                                                           | 5 |
| <i>circTTLL7</i> | miR-5192                                                           | 1 |
| <i>circTTLL7</i> | miR-5193                                                           | 2 |
| <i>circTTLL7</i> | miR-5194                                                           | 1 |
| <i>circTTLL7</i> | miR-5197-3p                                                        | 8 |
| <i>circTTLL7</i> | miR-5197-5p                                                        | 2 |
| <i>circTTLL7</i> | miR-519d-5p                                                        | 2 |
| <i>circTTLL7</i> | miR-520g-3p                                                        | 3 |
| <i>circTTLL7</i> | miR-524-5p                                                         | 2 |
| <i>circTTLL7</i> | miR-526b-5p                                                        | 2 |
| <i>circTTLL7</i> | miR-532-5p                                                         | 4 |
| <i>circTTLL7</i> | miR-539-5p                                                         | 1 |
| <i>circTTLL7</i> | miR-542-3p                                                         | 4 |
| <i>circTTLL7</i> | miR-544a                                                           | 2 |
| <i>circTTLL7</i> | miR-544b                                                           | 3 |
| <i>circTTLL7</i> | miR-545-3p                                                         | 2 |
| <i>circTTLL7</i> | miR-545-5p                                                         | 2 |
| <i>circTTLL7</i> | miR-548ah-5p/3609                                                  | 2 |
| <i>circTTLL7</i> | miR-548ao-3p                                                       | 3 |
| <i>circTTLL7</i> | miR-548ao-5p/548ax                                                 | 2 |
| <i>circTTLL7</i> | miR-548ap-3p/548aa/548t-3p                                         | 1 |
| <i>circTTLL7</i> | miR-548as-3p                                                       | 1 |
| <i>circTTLL7</i> | miR-548at-5p                                                       | 3 |
| <i>circTTLL7</i> | miR-548av-5p/548k/8054                                             | 3 |
| <i>circTTLL7</i> | miR-548ay-3p/548at-3p                                              | 1 |
| <i>circTTLL7</i> | miR-548ay-5p/548au-5p/548as-5p/548ar-3p/548aq-5p/548ap-5p/548am-3p | 3 |
| <i>circTTLL7</i> | miR-548az-5p/548t-5p                                               | 4 |
| <i>circTTLL7</i> | miR-548b-3p                                                        | 3 |
| <i>circTTLL7</i> | miR-548c-3p                                                        | 4 |
| <i>circTTLL7</i> | miR-548e-5p                                                        | 3 |
| <i>circTTLL7</i> | miR-548g-3p                                                        | 3 |
| <i>circTTLL7</i> | miR-548l                                                           | 3 |
| <i>circTTLL7</i> | miR-548n                                                           | 4 |
| <i>circTTLL7</i> | miR-548q                                                           | 1 |
| <i>circTTLL7</i> | miR-548s                                                           | 1 |
| <i>circTTLL7</i> | miR-548u/7161-5p                                                   | 4 |
| <i>circTTLL7</i> | miR-550a-3-5p/550a-5p/1271-3p                                      | 2 |
| <i>circTTLL7</i> | miR-550b-3p                                                        | 1 |

|                  |             |   |
|------------------|-------------|---|
| <i>circTTLL7</i> | miR-5572    | 1 |
| <i>circTTLL7</i> | miR-5580-3p | 2 |
| <i>circTTLL7</i> | miR-5584-3p | 3 |
| <i>circTTLL7</i> | miR-5585-5p | 2 |
| <i>circTTLL7</i> | miR-5586-3p | 1 |
| <i>circTTLL7</i> | miR-561-3p  | 3 |
| <i>circTTLL7</i> | miR-5691    | 2 |
| <i>circTTLL7</i> | miR-5692a   | 2 |
| <i>circTTLL7</i> | miR-5693    | 1 |
| <i>circTTLL7</i> | miR-5694    | 1 |
| <i>circTTLL7</i> | miR-5695    | 2 |
| <i>circTTLL7</i> | miR-5697    | 1 |
| <i>circTTLL7</i> | miR-570-3p  | 3 |
| <i>circTTLL7</i> | miR-5702    | 1 |
| <i>circTTLL7</i> | miR-576-3p  | 3 |
| <i>circTTLL7</i> | miR-576-5p  | 1 |
| <i>circTTLL7</i> | miR-577     | 3 |
| <i>circTTLL7</i> | miR-578     | 2 |
| <i>circTTLL7</i> | miR-580-3p  | 2 |
| <i>circTTLL7</i> | miR-580-5p  | 5 |
| <i>circTTLL7</i> | miR-582-5p  | 1 |
| <i>circTTLL7</i> | miR-583     | 3 |
| <i>circTTLL7</i> | miR-588     | 1 |
| <i>circTTLL7</i> | miR-589-3p  | 2 |
| <i>circTTLL7</i> | miR-597-5p  | 1 |
| <i>circTTLL7</i> | miR-600     | 3 |
| <i>circTTLL7</i> | miR-605-3p  | 2 |
| <i>circTTLL7</i> | miR-607     | 1 |
| <i>circTTLL7</i> | miR-6071    | 2 |
| <i>circTTLL7</i> | miR-6077    | 3 |
| <i>circTTLL7</i> | miR-6079    | 2 |
| <i>circTTLL7</i> | miR-6083    | 1 |
| <i>circTTLL7</i> | miR-6128    | 2 |
| <i>circTTLL7</i> | miR-6134    | 2 |
| <i>circTTLL7</i> | miR-618     | 2 |
| <i>circTTLL7</i> | miR-624-5p  | 2 |
| <i>circTTLL7</i> | miR-625-5p  | 2 |
| <i>circTTLL7</i> | miR-627-5p  | 2 |

|                  |                       |   |
|------------------|-----------------------|---|
| <i>circTTLL7</i> | miR-629-5p            | 2 |
| <i>circTTLL7</i> | miR-630               | 2 |
| <i>circTTLL7</i> | miR-636               | 2 |
| <i>circTTLL7</i> | miR-641/3617-5p       | 2 |
| <i>circTTLL7</i> | miR-646               | 5 |
| <i>circTTLL7</i> | miR-6499-3p           | 3 |
| <i>circTTLL7</i> | miR-6502-3p           | 3 |
| <i>circTTLL7</i> | miR-6507-3p           | 2 |
| <i>circTTLL7</i> | miR-6513-3p           | 2 |
| <i>circTTLL7</i> | miR-6514-3p           | 5 |
| <i>circTTLL7</i> | miR-6515-3p           | 2 |
| <i>circTTLL7</i> | miR-654-5p            | 2 |
| <i>circTTLL7</i> | miR-657               | 1 |
| <i>circTTLL7</i> | miR-660-3p            | 2 |
| <i>circTTLL7</i> | miR-663b              | 1 |
| <i>circTTLL7</i> | miR-670-3p            | 2 |
| <i>circTTLL7</i> | miR-671-3p            | 2 |
| <i>circTTLL7</i> | miR-6716-5p           | 1 |
| <i>circTTLL7</i> | miR-6728-3p           | 1 |
| <i>circTTLL7</i> | miR-6731-5p/8085      | 1 |
| <i>circTTLL7</i> | miR-6732-3p           | 1 |
| <i>circTTLL7</i> | miR-6732-5p           | 2 |
| <i>circTTLL7</i> | miR-6734-3p           | 1 |
| <i>circTTLL7</i> | miR-6736-3p           | 2 |
| <i>circTTLL7</i> | miR-6738-3p           | 2 |
| <i>circTTLL7</i> | miR-6739-3p           | 2 |
| <i>circTTLL7</i> | miR-6742-5p           | 2 |
| <i>circTTLL7</i> | miR-6749-3p           | 2 |
| <i>circTTLL7</i> | miR-675-3p            | 2 |
| <i>circTTLL7</i> | miR-6758-5p/6856-5p   | 5 |
| <i>circTTLL7</i> | miR-6759-3p           | 2 |
| <i>circTTLL7</i> | miR-676-5p            | 2 |
| <i>circTTLL7</i> | miR-6761-5p           | 5 |
| <i>circTTLL7</i> | miR-6764-3p/6824-3p   | 1 |
| <i>circTTLL7</i> | miR-6765-5p           | 3 |
| <i>circTTLL7</i> | miR-6769a-5p/6769b-5p | 2 |
| <i>circTTLL7</i> | miR-6771-3p           | 1 |
| <i>circTTLL7</i> | miR-6772-3p           | 1 |



|                  |                     |   |
|------------------|---------------------|---|
| <i>circTTLL7</i> | miR-6776-3p         | 1 |
| <i>circTTLL7</i> | miR-6795-3p         | 1 |
| <i>circTTLL7</i> | miR-6795-5p/6887-5p | 1 |
| <i>circTTLL7</i> | miR-6798-5p         | 1 |
| <i>circTTLL7</i> | miR-6799-5p         | 2 |
| <i>circTTLL7</i> | miR-6803-3p         | 1 |
| <i>circTTLL7</i> | miR-6804-5p         | 1 |
| <i>circTTLL7</i> | miR-6805-5p         | 2 |
| <i>circTTLL7</i> | miR-6810-5p         | 3 |
| <i>circTTLL7</i> | miR-6815-3p         | 2 |
| <i>circTTLL7</i> | miR-6820-5p         | 2 |
| <i>circTTLL7</i> | miR-6825-5p         | 3 |
| <i>circTTLL7</i> | miR-6827-5p         | 5 |
| <i>circTTLL7</i> | miR-6828-3p         | 2 |
| <i>circTTLL7</i> | miR-6829-5p         | 1 |
| <i>circTTLL7</i> | miR-6830-3p         | 2 |
| <i>circTTLL7</i> | miR-6833-5p         | 1 |
| <i>circTTLL7</i> | miR-6836-3p         | 3 |
| <i>circTTLL7</i> | miR-6840-3p         | 2 |
| <i>circTTLL7</i> | miR-6844            | 2 |
| <i>circTTLL7</i> | miR-6846-3p         | 1 |
| <i>circTTLL7</i> | miR-6847-3p         | 1 |
| <i>circTTLL7</i> | miR-6857-5p         | 3 |
| <i>circTTLL7</i> | miR-6859-3p         | 1 |
| <i>circTTLL7</i> | miR-6863            | 1 |
| <i>circTTLL7</i> | miR-6868-5p         | 1 |
| <i>circTTLL7</i> | miR-6869-5p         | 1 |
| <i>circTTLL7</i> | miR-6871-5p         | 3 |
| <i>circTTLL7</i> | miR-6873-5p         | 1 |
| <i>circTTLL7</i> | miR-6875-3p         | 2 |
| <i>circTTLL7</i> | miR-6878-5p         | 1 |
| <i>circTTLL7</i> | miR-6882-3p         | 1 |
| <i>circTTLL7</i> | miR-6882-5p         | 3 |
| <i>circTTLL7</i> | miR-6887-3p         | 1 |
| <i>circTTLL7</i> | miR-6894-3p         | 5 |
| <i>circTTLL7</i> | miR-7-3p            | 5 |
| <i>circTTLL7</i> | miR-7-5p            | 3 |
| <i>circTTLL7</i> | miR-7106-5p         | 2 |

|                  |                                       |   |
|------------------|---------------------------------------|---|
| <i>circTTLL7</i> | miR-7108-3p                           | 1 |
| <i>circTTLL7</i> | miR-7114-5p                           | 1 |
| <i>circTTLL7</i> | miR-7156-3p                           | 2 |
| <i>circTTLL7</i> | miR-7158-5p                           | 2 |
| <i>circTTLL7</i> | miR-7159-3p                           | 2 |
| <i>circTTLL7</i> | miR-7159-5p                           | 2 |
| <i>circTTLL7</i> | miR-762/4492/4498/5001-5p             | 1 |
| <i>circTTLL7</i> | miR-7641                              | 2 |
| <i>circTTLL7</i> | miR-767-3p                            | 4 |
| <i>circTTLL7</i> | miR-7850-5p                           | 6 |
| <i>circTTLL7</i> | miR-7854-3p                           | 2 |
| <i>circTTLL7</i> | miR-7856-5p                           | 2 |
| <i>circTTLL7</i> | miR-7974                              | 1 |
| <i>circTTLL7</i> | miR-7978                              | 1 |
| <i>circTTLL7</i> | miR-802                               | 2 |
| <i>circTTLL7</i> | miR-8057                              | 1 |
| <i>circTTLL7</i> | miR-8060                              | 3 |
| <i>circTTLL7</i> | miR-8063                              | 3 |
| <i>circTTLL7</i> | miR-8066                              | 6 |
| <i>circTTLL7</i> | miR-8068                              | 2 |
| <i>circTTLL7</i> | miR-8070                              | 2 |
| <i>circTTLL7</i> | miR-8081                              | 1 |
| <i>circTTLL7</i> | miR-8088                              | 2 |
| <i>circTTLL7</i> | miR-873-5p.1                          | 4 |
| <i>circTTLL7</i> | miR-874-3p                            | 1 |
| <i>circTTLL7</i> | miR-876-5p                            | 1 |
| <i>circTTLL7</i> | miR-891b                              | 2 |
| <i>circTTLL7</i> | miR-892-5p                            | 2 |
| <i>circTTLL7</i> | miR-892b                              | 2 |
| <i>circTTLL7</i> | miR-921                               | 1 |
| <i>circTTLL7</i> | miR-922                               | 7 |
| <i>circTTLL7</i> | miR-924                               | 2 |
| <i>circTTLL7</i> | miR-92a-2-5p                          | 2 |
| <i>circTTLL7</i> | miR-937-5p                            | 2 |
| <i>circTTLL7</i> | miR-939-5p/1343-5p                    | 3 |
| <i>circTTLL7</i> | miR-940/6808-5p/6893-5p               | 3 |
| <i>circTTLL7</i> | miR-944                               | 2 |
| <i>circTTLL7</i> | let-7a-3p/let-7b-3p/let-7f-1-3p/98-3p | 2 |

|                  |                     |   |
|------------------|---------------------|---|
| <i>circTTLL7</i> | let-7f-2-3p/1185-3p | 2 |
| <i>circTTLL7</i> | miR-10-5p           | 1 |
| <i>circTTLL7</i> | miR-100-3p          | 3 |
| <i>circTTLL7</i> | miR-106a-3p         | 1 |
| <i>circTTLL7</i> | miR-1180-5p         | 1 |
| <i>circTTLL7</i> | miR-1197            | 1 |
| <i>circTTLL7</i> | miR-1199-5p/6751-3p | 1 |
| <i>circTTLL7</i> | miR-1200            | 1 |
| <i>circTTLL7</i> | miR-122-5p          | 2 |
| <i>circTTLL7</i> | miR-1225-3p         | 1 |
| <i>circTTLL7</i> | miR-1225-5p         | 1 |
| <i>circTTLL7</i> | miR-1226-3p         | 1 |
| <i>circTTLL7</i> | miR-1226-5p         | 1 |
| <i>circTTLL7</i> | miR-1227-3p         | 2 |
| <i>circTTLL7</i> | miR-1228-3p         | 1 |
| <i>circTTLL7</i> | miR-1228-5p         | 1 |
| <i>circTTLL7</i> | miR-1229-3p         | 1 |
| <i>circTTLL7</i> | miR-1229-5p         | 1 |
| <i>circTTLL7</i> | miR-1231            | 1 |
| <i>circTTLL7</i> | miR-1233-3p         | 1 |
| <i>circTTLL7</i> | miR-1234-3p/7107-5p | 1 |
| <i>circTTLL7</i> | miR-1245a/8079      | 1 |
| <i>circTTLL7</i> | miR-1247-5p         | 1 |
| <i>circTTLL7</i> | miR-125-5p          | 1 |
| <i>circTTLL7</i> | miR-1251-3p         | 2 |
| <i>circTTLL7</i> | miR-1252-5p         | 4 |
| <i>circTTLL7</i> | miR-1253            | 2 |
| <i>circTTLL7</i> | miR-1254/3116       | 1 |
| <i>circTTLL7</i> | miR-1255a/1255b-5p  | 2 |
| <i>circTTLL7</i> | miR-1261            | 1 |
| <i>circTTLL7</i> | miR-1264            | 1 |
| <i>circTTLL7</i> | miR-1265            | 1 |
| <i>circTTLL7</i> | miR-1266-5p/4518    | 2 |
| <i>circTTLL7</i> | miR-1267            | 1 |
| <i>circTTLL7</i> | miR-1268a/1268b     | 2 |
| <i>circTTLL7</i> | miR-127-3p          | 1 |
| <i>circTTLL7</i> | miR-127-5p          | 2 |
| <i>circTTLL7</i> | miR-1273a           | 1 |

|                  |                          |   |
|------------------|--------------------------|---|
| <i>circTTLL7</i> | miR-1273c                | 1 |
| <i>circTTLL7</i> | miR-1273d                | 1 |
| <i>circTTLL7</i> | miR-1273g-3p             | 1 |
| <i>circTTLL7</i> | miR-1277-5p              | 2 |
| <i>circTTLL7</i> | miR-1285-5p              | 2 |
| <i>circTTLL7</i> | miR-1286                 | 2 |
| <i>circTTLL7</i> | miR-129-5p               | 1 |
| <i>circTTLL7</i> | miR-1294                 | 1 |
| <i>circTTLL7</i> | miR-1295b-5p/1912        | 1 |
| <i>circTTLL7</i> | miR-1298-5p              | 1 |
| <i>circTTLL7</i> | miR-130-3p/301-3p/454-3p | 1 |
| <i>circTTLL7</i> | miR-1306-5p              | 1 |
| <i>circTTLL7</i> | miR-1307-3p              | 1 |
| <i>circTTLL7</i> | miR-130b-5p              | 4 |
| <i>circTTLL7</i> | miR-1343-3p              | 2 |
| <i>circTTLL7</i> | miR-135-5p               | 1 |
| <i>circTTLL7</i> | miR-141-3p/200-3p        | 2 |
| <i>circTTLL7</i> | miR-143-5p               | 2 |
| <i>circTTLL7</i> | miR-145-3p               | 1 |
| <i>circTTLL7</i> | miR-146-5p               | 1 |
| <i>circTTLL7</i> | miR-147a                 | 1 |
| <i>circTTLL7</i> | miR-147b                 | 1 |
| <i>circTTLL7</i> | miR-148-3p/152-3p        | 1 |
| <i>circTTLL7</i> | miR-149-5p               | 1 |
| <i>circTTLL7</i> | miR-150-5p               | 1 |
| <i>circTTLL7</i> | miR-151-3p               | 1 |
| <i>circTTLL7</i> | miR-151-5p               | 4 |
| <i>circTTLL7</i> | miR-153-5p               | 2 |
| <i>circTTLL7</i> | miR-154-5p               | 1 |
| <i>circTTLL7</i> | miR-1587/3620-5p         | 1 |
| <i>circTTLL7</i> | miR-19-3p                | 1 |
| <i>circTTLL7</i> | miR-1908-5p              | 2 |
| <i>circTTLL7</i> | miR-1909-5p              | 1 |
| <i>circTTLL7</i> | miR-191-5p               | 1 |
| <i>circTTLL7</i> | miR-1910-5p              | 1 |
| <i>circTTLL7</i> | miR-1911-3p              | 1 |
| <i>circTTLL7</i> | miR-1976                 | 1 |
| <i>circTTLL7</i> | miR-203a-3p.1            | 1 |

|                  |                                              |   |
|------------------|----------------------------------------------|---|
| <i>circTTLL7</i> | miR-204-3p/4646-5p                           | 4 |
| <i>circTTLL7</i> | miR-205-3p                                   | 1 |
| <i>circTTLL7</i> | miR-205-5p                                   | 1 |
| <i>circTTLL7</i> | miR-208-5p                                   | 1 |
| <i>circTTLL7</i> | miR-210-3p                                   | 1 |
| <i>circTTLL7</i> | miR-2114-5p                                  | 1 |
| <i>circTTLL7</i> | miR-2116-3p                                  | 1 |
| <i>circTTLL7</i> | miR-215-3p                                   | 1 |
| <i>circTTLL7</i> | miR-216b-3p                                  | 2 |
| <i>circTTLL7</i> | miR-219-5p                                   | 4 |
| <i>circTTLL7</i> | miR-219a-1-3p                                | 2 |
| <i>circTTLL7</i> | miR-219a-2-3p                                | 2 |
| <i>circTTLL7</i> | miR-219b-3p                                  | 2 |
| <i>circTTLL7</i> | miR-221-3p/222-3p                            | 1 |
| <i>circTTLL7</i> | miR-221-5p/8073                              | 1 |
| <i>circTTLL7</i> | miR-2276-3p                                  | 1 |
| <i>circTTLL7</i> | miR-24-5p                                    | 1 |
| <i>circTTLL7</i> | miR-2467-3p                                  | 2 |
| <i>circTTLL7</i> | miR-2467-5p                                  | 4 |
| <i>circTTLL7</i> | miR-25-5p                                    | 2 |
| <i>circTTLL7</i> | miR-27b-5p                                   | 1 |
| <i>circTTLL7</i> | miR-299-5p                                   | 1 |
| <i>circTTLL7</i> | miR-29b-2-5p                                 | 1 |
| <i>circTTLL7</i> | miR-302b-5p/302d-5p                          | 2 |
| <i>circTTLL7</i> | miR-302c-3p.2/520-3p                         | 1 |
| <i>circTTLL7</i> | miR-3065-3p                                  | 1 |
| <i>circTTLL7</i> | miR-3074-5p                                  | 1 |
| <i>circTTLL7</i> | miR-30b-3p/1273h-5p/3689-3p/6779-5p/6780a-5p | 2 |
| <i>circTTLL7</i> | miR-30c-3p/6788-5p                           | 2 |
| <i>circTTLL7</i> | miR-3115                                     | 2 |
| <i>circTTLL7</i> | miR-3117-3p                                  | 1 |
| <i>circTTLL7</i> | miR-3121-3p                                  | 1 |
| <i>circTTLL7</i> | miR-3121-5p                                  | 2 |
| <i>circTTLL7</i> | miR-3122/3913-5p                             | 1 |
| <i>circTTLL7</i> | miR-3124-3p                                  | 3 |
| <i>circTTLL7</i> | miR-3129-3p/5583-5p                          | 1 |
| <i>circTTLL7</i> | miR-3130-3p                                  | 1 |
| <i>circTTLL7</i> | miR-3130-5p/4482-5p                          | 1 |

|                  |                           |   |
|------------------|---------------------------|---|
| <i>circTTLL7</i> | miR-3140-3p               | 1 |
| <i>circTTLL7</i> | miR-3140-5p               | 1 |
| <i>circTTLL7</i> | miR-3141                  | 1 |
| <i>circTTLL7</i> | miR-3144-3p               | 1 |
| <i>circTTLL7</i> | miR-3145-3p               | 6 |
| <i>circTTLL7</i> | miR-3145-5p               | 1 |
| <i>circTTLL7</i> | miR-3146                  | 1 |
| <i>circTTLL7</i> | miR-3148                  | 4 |
| <i>circTTLL7</i> | miR-3150a-5p/3150b-5p     | 4 |
| <i>circTTLL7</i> | miR-3151-3p               | 1 |
| <i>circTTLL7</i> | miR-3152-5p               | 2 |
| <i>circTTLL7</i> | miR-3154                  | 1 |
| <i>circTTLL7</i> | miR-3171                  | 1 |
| <i>circTTLL7</i> | miR-3173-3p/6891-5p       | 1 |
| <i>circTTLL7</i> | miR-3178                  | 1 |
| <i>circTTLL7</i> | miR-3183/4723-3p/6769b-3p | 1 |
| <i>circTTLL7</i> | miR-3184-3p               | 1 |
| <i>circTTLL7</i> | miR-3188                  | 4 |
| <i>circTTLL7</i> | miR-3189-5p               | 1 |
| <i>circTTLL7</i> | miR-3192-5p               | 4 |
| <i>circTTLL7</i> | miR-3193                  | 2 |
| <i>circTTLL7</i> | miR-3197                  | 2 |
| <i>circTTLL7</i> | miR-32-3p                 | 1 |
| <i>circTTLL7</i> | miR-320                   | 3 |
| <i>circTTLL7</i> | miR-323a-5p               | 1 |
| <i>circTTLL7</i> | miR-325                   | 1 |
| <i>circTTLL7</i> | miR-330-3p                | 2 |
| <i>circTTLL7</i> | miR-338-3p                | 1 |
| <i>circTTLL7</i> | miR-340-3p/6827-3p        | 1 |
| <i>circTTLL7</i> | miR-345-3p                | 1 |
| <i>circTTLL7</i> | miR-346                   | 1 |
| <i>circTTLL7</i> | miR-3605-3p               | 1 |
| <i>circTTLL7</i> | miR-3611                  | 5 |
| <i>circTTLL7</i> | miR-3612                  | 5 |
| <i>circTTLL7</i> | miR-3614-3p               | 1 |
| <i>circTTLL7</i> | miR-3614-5p               | 1 |
| <i>circTTLL7</i> | miR-3619-3p               | 4 |
| <i>circTTLL7</i> | miR-362-5p/500b-5p        | 1 |

|                  |                                   |   |
|------------------|-----------------------------------|---|
| <i>circTTLL7</i> | miR-3622a-5p                      | 2 |
| <i>circTTLL7</i> | miR-3622b-5p                      | 1 |
| <i>circTTLL7</i> | miR-3650                          | 1 |
| <i>circTTLL7</i> | miR-3653-5p                       | 1 |
| <i>circTTLL7</i> | miR-3660/4526                     | 1 |
| <i>circTTLL7</i> | miR-3663-5p                       | 1 |
| <i>circTTLL7</i> | miR-3664-3p                       | 2 |
| <i>circTTLL7</i> | miR-3668                          | 2 |
| <i>circTTLL7</i> | miR-367-5p                        | 1 |
| <i>circTTLL7</i> | miR-3674                          | 1 |
| <i>circTTLL7</i> | miR-3675-5p                       | 1 |
| <i>circTTLL7</i> | miR-3683                          | 1 |
| <i>circTTLL7</i> | miR-3684                          | 1 |
| <i>circTTLL7</i> | miR-3688-3p                       | 1 |
| <i>circTTLL7</i> | miR-3689a-5p/3689b-5p/3689e/3689f | 1 |
| <i>circTTLL7</i> | miR-3692-5p                       | 1 |
| <i>circTTLL7</i> | miR-376b-5p/376c-5p               | 1 |
| <i>circTTLL7</i> | miR-377-3p                        | 1 |
| <i>circTTLL7</i> | miR-378a-5p                       | 1 |
| <i>circTTLL7</i> | miR-378g                          | 1 |
| <i>circTTLL7</i> | miR-378j/6839-5p                  | 1 |
| <i>circTTLL7</i> | miR-380-3p                        | 2 |
| <i>circTTLL7</i> | miR-381-3p                        | 2 |
| <i>circTTLL7</i> | miR-382-5p                        | 3 |
| <i>circTTLL7</i> | miR-383-3p                        | 1 |
| <i>circTTLL7</i> | miR-383-5p.1                      | 1 |
| <i>circTTLL7</i> | miR-3908                          | 3 |
| <i>circTTLL7</i> | miR-3914                          | 1 |
| <i>circTTLL7</i> | miR-3919                          | 2 |
| <i>circTTLL7</i> | miR-3920                          | 3 |
| <i>circTTLL7</i> | miR-3923                          | 1 |
| <i>circTTLL7</i> | miR-3924                          | 2 |
| <i>circTTLL7</i> | miR-3925-3p                       | 2 |
| <i>circTTLL7</i> | miR-3927-5p                       | 1 |
| <i>circTTLL7</i> | miR-3928-5p/6806-3p               | 1 |
| <i>circTTLL7</i> | miR-3929/4419b/4478               | 2 |
| <i>circTTLL7</i> | miR-3936                          | 1 |
| <i>circTTLL7</i> | miR-3942-5p                       | 3 |

|                  |                    |   |
|------------------|--------------------|---|
| <i>circTTLL7</i> | miR-3943           | 2 |
| <i>circTTLL7</i> | miR-3945           | 1 |
| <i>circTTLL7</i> | miR-3975           | 4 |
| <i>circTTLL7</i> | miR-3978           | 1 |
| <i>circTTLL7</i> | miR-409-5p         | 2 |
| <i>circTTLL7</i> | miR-412-5p         | 2 |
| <i>circTTLL7</i> | miR-424-3p         | 1 |
| <i>circTTLL7</i> | miR-4252           | 3 |
| <i>circTTLL7</i> | miR-4253/6862-5p   | 1 |
| <i>circTTLL7</i> | miR-4259           | 1 |
| <i>circTTLL7</i> | miR-4266           | 1 |
| <i>circTTLL7</i> | miR-4267           | 2 |
| <i>circTTLL7</i> | miR-4268           | 1 |
| <i>circTTLL7</i> | miR-4272           | 2 |
| <i>circTTLL7</i> | miR-4275           | 1 |
| <i>circTTLL7</i> | miR-4289           | 1 |
| <i>circTTLL7</i> | miR-4293           | 3 |
| <i>circTTLL7</i> | miR-4301           | 1 |
| <i>circTTLL7</i> | miR-431-3p         | 1 |
| <i>circTTLL7</i> | miR-4314           | 1 |
| <i>circTTLL7</i> | miR-4316           | 1 |
| <i>circTTLL7</i> | miR-4317           | 1 |
| <i>circTTLL7</i> | miR-432-5p         | 2 |
| <i>circTTLL7</i> | miR-4323           | 2 |
| <i>circTTLL7</i> | miR-4325           | 2 |
| <i>circTTLL7</i> | miR-4326           | 1 |
| <i>circTTLL7</i> | miR-4327           | 1 |
| <i>circTTLL7</i> | miR-433-3p         | 1 |
| <i>circTTLL7</i> | miR-4330           | 1 |
| <i>circTTLL7</i> | miR-4423-5p        | 1 |
| <i>circTTLL7</i> | miR-4427           | 1 |
| <i>circTTLL7</i> | miR-4428           | 1 |
| <i>circTTLL7</i> | miR-4432           | 4 |
| <i>circTTLL7</i> | miR-4433a-3p       | 3 |
| <i>circTTLL7</i> | miR-4433a-5p       | 1 |
| <i>circTTLL7</i> | miR-4434/4516/5703 | 1 |
| <i>circTTLL7</i> | miR-4436b-5p       | 1 |
| <i>circTTLL7</i> | miR-4445-5p        | 4 |



|                  |                     |   |
|------------------|---------------------|---|
| <i>circTTLL7</i> | miR-4448            | 1 |
| <i>circTTLL7</i> | miR-4453/4538       | 1 |
| <i>circTTLL7</i> | miR-4459            | 3 |
| <i>circTTLL7</i> | miR-4463            | 1 |
| <i>circTTLL7</i> | miR-4468            | 2 |
| <i>circTTLL7</i> | miR-4474-3p         | 1 |
| <i>circTTLL7</i> | miR-4476/6876-5p    | 5 |
| <i>circTTLL7</i> | miR-4484            | 2 |
| <i>circTTLL7</i> | miR-4486            | 1 |
| <i>circTTLL7</i> | miR-4494            | 1 |
| <i>circTTLL7</i> | miR-4495            | 1 |
| <i>circTTLL7</i> | miR-4499            | 1 |
| <i>circTTLL7</i> | miR-4501            | 4 |
| <i>circTTLL7</i> | miR-4506            | 1 |
| <i>circTTLL7</i> | miR-4509            | 1 |
| <i>circTTLL7</i> | miR-450a-1-3p       | 1 |
| <i>circTTLL7</i> | miR-450b-3p/769-3p  | 1 |
| <i>circTTLL7</i> | miR-4523            | 1 |
| <i>circTTLL7</i> | miR-4524a-3p        | 1 |
| <i>circTTLL7</i> | miR-4528            | 2 |
| <i>circTTLL7</i> | miR-4530            | 1 |
| <i>circTTLL7</i> | miR-4536-5p         | 1 |
| <i>circTTLL7</i> | miR-455-3p.1        | 1 |
| <i>circTTLL7</i> | miR-455-3p.2        | 2 |
| <i>circTTLL7</i> | miR-4638-5p         | 1 |
| <i>circTTLL7</i> | miR-4639-3p         | 2 |
| <i>circTTLL7</i> | miR-4639-5p         | 2 |
| <i>circTTLL7</i> | miR-4645-3p         | 1 |
| <i>circTTLL7</i> | miR-4645-5p/4673    | 1 |
| <i>circTTLL7</i> | miR-4649-3p         | 3 |
| <i>circTTLL7</i> | miR-4649-5p/6729-5p | 1 |
| <i>circTTLL7</i> | miR-466             | 1 |
| <i>circTTLL7</i> | miR-4661-3p         | 1 |
| <i>circTTLL7</i> | miR-4661-5p         | 2 |
| <i>circTTLL7</i> | miR-4662a-3p        | 5 |
| <i>circTTLL7</i> | miR-4663            | 3 |
| <i>circTTLL7</i> | miR-4665-3p         | 1 |
| <i>circTTLL7</i> | miR-4666a-3p        | 2 |

|                  |                     |   |
|------------------|---------------------|---|
| <i>circTTLL7</i> | miR-4668-3p         | 1 |
| <i>circTTLL7</i> | miR-4674            | 1 |
| <i>circTTLL7</i> | miR-4680-3p         | 1 |
| <i>circTTLL7</i> | miR-4681            | 1 |
| <i>circTTLL7</i> | miR-4684-5p         | 2 |
| <i>circTTLL7</i> | miR-4690-5p         | 1 |
| <i>circTTLL7</i> | miR-4694-3p         | 2 |
| <i>circTTLL7</i> | miR-4695-3p         | 1 |
| <i>circTTLL7</i> | miR-4695-5p         | 3 |
| <i>circTTLL7</i> | miR-4696            | 1 |
| <i>circTTLL7</i> | miR-4700-3p         | 1 |
| <i>circTTLL7</i> | miR-4711-3p         | 1 |
| <i>circTTLL7</i> | miR-4713-5p         | 1 |
| <i>circTTLL7</i> | miR-4714-3p         | 1 |
| <i>circTTLL7</i> | miR-4715-3p         | 2 |
| <i>circTTLL7</i> | miR-4715-5p         | 1 |
| <i>circTTLL7</i> | miR-4722-5p         | 2 |
| <i>circTTLL7</i> | miR-4724-3p         | 1 |
| <i>circTTLL7</i> | miR-4725-5p         | 1 |
| <i>circTTLL7</i> | miR-4730            | 1 |
| <i>circTTLL7</i> | miR-4732-3p         | 1 |
| <i>circTTLL7</i> | miR-4733-3p         | 1 |
| <i>circTTLL7</i> | miR-4733-5p         | 1 |
| <i>circTTLL7</i> | miR-4738-3p         | 2 |
| <i>circTTLL7</i> | miR-4738-5p         | 1 |
| <i>circTTLL7</i> | miR-4743-5p         | 1 |
| <i>circTTLL7</i> | miR-4744            | 1 |
| <i>circTTLL7</i> | miR-4751            | 4 |
| <i>circTTLL7</i> | miR-4756-3p         | 2 |
| <i>circTTLL7</i> | miR-4757-5p/6744-3p | 1 |
| <i>circTTLL7</i> | miR-4758-3p         | 1 |
| <i>circTTLL7</i> | miR-4760-3p         | 2 |
| <i>circTTLL7</i> | miR-4762-5p         | 1 |
| <i>circTTLL7</i> | miR-4764-3p         | 2 |
| <i>circTTLL7</i> | miR-4766-3p         | 2 |
| <i>circTTLL7</i> | miR-4767            | 2 |
| <i>circTTLL7</i> | miR-4768-3p         | 3 |
| <i>circTTLL7</i> | miR-4768-5p/6833-3p | 1 |

|                  |                     |   |
|------------------|---------------------|---|
| <i>circTTLL7</i> | miR-4772-3p         | 1 |
| <i>circTTLL7</i> | miR-4772-5p         | 1 |
| <i>circTTLL7</i> | miR-4774-3p         | 2 |
| <i>circTTLL7</i> | miR-4775            | 1 |
| <i>circTTLL7</i> | miR-4778-5p         | 1 |
| <i>circTTLL7</i> | miR-4779            | 3 |
| <i>circTTLL7</i> | miR-4786-3p         | 1 |
| <i>circTTLL7</i> | miR-4786-5p         | 2 |
| <i>circTTLL7</i> | miR-4789-5p         | 2 |
| <i>circTTLL7</i> | miR-4793-3p         | 1 |
| <i>circTTLL7</i> | miR-4793-5p         | 1 |
| <i>circTTLL7</i> | miR-4797-5p         | 1 |
| <i>circTTLL7</i> | miR-4803            | 1 |
| <i>circTTLL7</i> | miR-483-3p.2        | 1 |
| <i>circTTLL7</i> | miR-484/3155        | 1 |
| <i>circTTLL7</i> | miR-485-5p          | 4 |
| <i>circTTLL7</i> | miR-487a-5p/487b-5p | 1 |
| <i>circTTLL7</i> | miR-488-3p          | 1 |
| <i>circTTLL7</i> | miR-489-3p          | 1 |
| <i>circTTLL7</i> | miR-490-3p          | 1 |
| <i>circTTLL7</i> | miR-495-5p          | 3 |
| <i>circTTLL7</i> | miR-498             | 2 |
| <i>circTTLL7</i> | miR-499b-5p         | 1 |
| <i>circTTLL7</i> | miR-5003-3p         | 3 |
| <i>circTTLL7</i> | miR-5004-3p         | 5 |
| <i>circTTLL7</i> | miR-5004-5p         | 4 |
| <i>circTTLL7</i> | miR-5008-5p         | 1 |
| <i>circTTLL7</i> | miR-500a-5p         | 1 |
| <i>circTTLL7</i> | miR-501-5p          | 1 |
| <i>circTTLL7</i> | miR-504-5p.1        | 1 |
| <i>circTTLL7</i> | miR-505-3p.1        | 1 |
| <i>circTTLL7</i> | miR-508-3p          | 4 |
| <i>circTTLL7</i> | miR-508-5p          | 1 |
| <i>circTTLL7</i> | miR-5089-3p         | 1 |
| <i>circTTLL7</i> | miR-5089-5p         | 1 |
| <i>circTTLL7</i> | miR-5092            | 1 |
| <i>circTTLL7</i> | miR-5093            | 1 |
| <i>circTTLL7</i> | miR-510-3p          | 3 |

|                  |                                                                  |   |
|------------------|------------------------------------------------------------------|---|
| <i>circTTLL7</i> | miR-510-5p                                                       | 1 |
| <i>circTTLL7</i> | miR-511-3p                                                       | 2 |
| <i>circTTLL7</i> | miR-512-3p                                                       | 1 |
| <i>circTTLL7</i> | miR-512-5p                                                       | 1 |
| <i>circTTLL7</i> | miR-514a-3p                                                      | 1 |
| <i>circTTLL7</i> | miR-5187-3p                                                      | 1 |
| <i>circTTLL7</i> | miR-5187-5p                                                      | 1 |
| <i>circTTLL7</i> | miR-5191                                                         | 1 |
| <i>circTTLL7</i> | miR-5196-3p                                                      | 1 |
| <i>circTTLL7</i> | miR-522-3p                                                       | 2 |
| <i>circTTLL7</i> | miR-532-3p                                                       | 1 |
| <i>circTTLL7</i> | miR-548ac/548bb-3p/548d-3p/548h-3p/548z                          |   |
| <i>circTTLL7</i> | miR-548ad-3p                                                     | 1 |
| <i>circTTLL7</i> | miR-548an                                                        | 2 |
| <i>circTTLL7</i> | miR-548aq-3p/548am-3p/548aj-3p/548ah-3p/548ae-3p/548j-3p/548x-3p |   |
| <i>circTTLL7</i> | miR-548av-3p                                                     | 1 |
| <i>circTTLL7</i> | miR-548az-3p/548ar-3p/548a-3p/548e-3p/548f-3p                    |   |
| <i>circTTLL7</i> | miR-548p                                                         | 2 |
| <i>circTTLL7</i> | miR-548v                                                         | 1 |
| <i>circTTLL7</i> | miR-550b-2-5p                                                    | 2 |
| <i>circTTLL7</i> | miR-551b-5p                                                      | 1 |
| <i>circTTLL7</i> | miR-553                                                          | 1 |
| <i>circTTLL7</i> | miR-556-5p                                                       | 1 |
| <i>circTTLL7</i> | miR-5582-3p                                                      | 5 |
| <i>circTTLL7</i> | miR-5582-5p                                                      | 2 |
| <i>circTTLL7</i> | miR-5585-3p                                                      | 2 |
| <i>circTTLL7</i> | miR-5587-5p                                                      | 2 |
| <i>circTTLL7</i> | miR-5588-3p                                                      | 1 |
| <i>circTTLL7</i> | miR-566                                                          | 1 |
| <i>circTTLL7</i> | miR-5680                                                         | 1 |
| <i>circTTLL7</i> | miR-5683                                                         | 1 |
| <i>circTTLL7</i> | miR-5690                                                         | 2 |
| <i>circTTLL7</i> | miR-5696                                                         | 2 |
| <i>circTTLL7</i> | miR-5699-5p                                                      | 1 |
| <i>circTTLL7</i> | miR-571                                                          | 2 |
| <i>circTTLL7</i> | miR-573/3616-5p                                                  | 1 |
| <i>circTTLL7</i> | miR-579-3p                                                       | 2 |
| <i>circTTLL7</i> | miR-581                                                          | 1 |

|                  |                                      |   |
|------------------|--------------------------------------|---|
| <i>circTTLL7</i> | miR-584-3p                           | 1 |
| <i>circTTLL7</i> | miR-584-5p                           | 1 |
| <i>circTTLL7</i> | miR-585-3p                           | 2 |
| <i>circTTLL7</i> | miR-586                              | 1 |
| <i>circTTLL7</i> | miR-587                              | 2 |
| <i>circTTLL7</i> | miR-589-5p                           | 1 |
| <i>circTTLL7</i> | miR-591                              | 1 |
| <i>circTTLL7</i> | miR-592                              | 1 |
| <i>circTTLL7</i> | miR-593-3p                           | 1 |
| <i>circTTLL7</i> | miR-595                              | 1 |
| <i>circTTLL7</i> | miR-596                              | 3 |
| <i>circTTLL7</i> | miR-599                              | 1 |
| <i>circTTLL7</i> | miR-604                              | 1 |
| <i>circTTLL7</i> | miR-606                              | 4 |
| <i>circTTLL7</i> | miR-6072/6891-3p                     | 1 |
| <i>circTTLL7</i> | miR-6074                             | 1 |
| <i>circTTLL7</i> | miR-6078                             | 1 |
| <i>circTTLL7</i> | miR-6081                             | 3 |
| <i>circTTLL7</i> | miR-6087                             | 2 |
| <i>circTTLL7</i> | miR-6089                             | 1 |
| <i>circTTLL7</i> | miR-611/3131                         | 4 |
| <i>circTTLL7</i> | miR-612/1285-3p/3187-5p/5189-5p/6860 | 1 |
| <i>circTTLL7</i> | miR-6124                             | 4 |
| <i>circTTLL7</i> | miR-6125                             | 1 |
| <i>circTTLL7</i> | miR-6126                             | 3 |
| <i>circTTLL7</i> | miR-615-3p                           | 1 |
| <i>circTTLL7</i> | miR-616-3p                           | 1 |
| <i>circTTLL7</i> | miR-6165                             | 1 |
| <i>circTTLL7</i> | miR-619-3p                           | 2 |
| <i>circTTLL7</i> | miR-619-5p/6506-5p                   | 4 |
| <i>circTTLL7</i> | miR-628-3p                           | 1 |
| <i>circTTLL7</i> | miR-628-5p                           | 1 |
| <i>circTTLL7</i> | miR-631/3661                         | 1 |
| <i>circTTLL7</i> | miR-632/4288                         | 1 |
| <i>circTTLL7</i> | miR-634                              | 1 |
| <i>circTTLL7</i> | miR-640                              | 1 |
| <i>circTTLL7</i> | miR-647                              | 1 |
| <i>circTTLL7</i> | miR-649                              | 1 |

|                  |                  |   |
|------------------|------------------|---|
| <i>circTTLL7</i> | miR-6499-5p      | 3 |
| <i>circTTLL7</i> | miR-6500-3p      | 1 |
| <i>circTTLL7</i> | miR-6501-3p      | 1 |
| <i>circTTLL7</i> | miR-6501-5p      | 1 |
| <i>circTTLL7</i> | miR-6505-5p      | 1 |
| <i>circTTLL7</i> | miR-6507-5p      | 2 |
| <i>circTTLL7</i> | miR-6509-3p      | 1 |
| <i>circTTLL7</i> | miR-651-3p       | 6 |
| <i>circTTLL7</i> | miR-6510-5p      | 1 |
| <i>circTTLL7</i> | miR-6513-5p      | 1 |
| <i>circTTLL7</i> | miR-6516-3p      | 1 |
| <i>circTTLL7</i> | miR-6516-5p      | 1 |
| <i>circTTLL7</i> | miR-652-5p       | 1 |
| <i>circTTLL7</i> | miR-653-5p       | 2 |
| <i>circTTLL7</i> | miR-661          | 1 |
| <i>circTTLL7</i> | miR-664a-5p/4794 | 1 |
| <i>circTTLL7</i> | miR-668-5p       | 1 |
| <i>circTTLL7</i> | miR-671-5p       | 2 |
| <i>circTTLL7</i> | miR-6719-3p      | 1 |
| <i>circTTLL7</i> | miR-6720-3p      | 1 |
| <i>circTTLL7</i> | miR-6720-5p      | 2 |
| <i>circTTLL7</i> | miR-6728-5p      | 1 |
| <i>circTTLL7</i> | miR-6730-3p      | 1 |
| <i>circTTLL7</i> | miR-6734-5p      | 1 |
| <i>circTTLL7</i> | miR-6742-3p      | 3 |
| <i>circTTLL7</i> | miR-6744-5p      | 2 |
| <i>circTTLL7</i> | miR-6750-3p      | 2 |
| <i>circTTLL7</i> | miR-6753-5p      | 1 |
| <i>circTTLL7</i> | miR-6758-3p      | 3 |
| <i>circTTLL7</i> | miR-676-3p       | 1 |
| <i>circTTLL7</i> | miR-6762-3p      | 1 |
| <i>circTTLL7</i> | miR-6768-3p      | 2 |
| <i>circTTLL7</i> | miR-6768-5p      | 1 |
| <i>circTTLL7</i> | miR-6769a-3p     | 2 |
| <i>circTTLL7</i> | miR-6770-3p      | 1 |
| <i>circTTLL7</i> | miR-6770-5p      | 2 |
| <i>circTTLL7</i> | miR-6773-3p      | 1 |
| <i>circTTLL7</i> | miR-6777-3p      | 2 |

|                  |                     |   |
|------------------|---------------------|---|
| <i>circTTLL7</i> | miR-6782-3p         | 1 |
| <i>circTTLL7</i> | miR-6783-5p         | 1 |
| <i>circTTLL7</i> | miR-6789-3p         | 1 |
| <i>circTTLL7</i> | miR-6793-3p         | 1 |
| <i>circTTLL7</i> | miR-6796-3p         | 3 |
| <i>circTTLL7</i> | miR-6800-3p         | 2 |
| <i>circTTLL7</i> | miR-6807-5p         | 1 |
| <i>circTTLL7</i> | miR-6809-3p         | 1 |
| <i>circTTLL7</i> | miR-6814-5p         | 2 |
| <i>circTTLL7</i> | miR-6818-5p         | 1 |
| <i>circTTLL7</i> | miR-6819-3p/6877-3p | 1 |
| <i>circTTLL7</i> | miR-6822-3p         | 2 |
| <i>circTTLL7</i> | miR-6828-5p         | 2 |
| <i>circTTLL7</i> | miR-6834-3p         | 1 |
| <i>circTTLL7</i> | miR-6834-5p         | 1 |
| <i>circTTLL7</i> | miR-6838-3p         | 1 |
| <i>circTTLL7</i> | miR-6842-3p         | 1 |
| <i>circTTLL7</i> | miR-6845-3p         | 1 |
| <i>circTTLL7</i> | miR-6849-3p         | 1 |
| <i>circTTLL7</i> | miR-6852-5p         | 3 |
| <i>circTTLL7</i> | miR-6853-5p         | 1 |
| <i>circTTLL7</i> | miR-6854-5p         | 1 |
| <i>circTTLL7</i> | miR-6864-5p         | 3 |
| <i>circTTLL7</i> | miR-6867-3p         | 1 |
| <i>circTTLL7</i> | miR-6868-3p         | 1 |
| <i>circTTLL7</i> | miR-6874-5p         | 3 |
| <i>circTTLL7</i> | miR-6884-3p         | 2 |
| <i>circTTLL7</i> | miR-6885-3p         | 1 |
| <i>circTTLL7</i> | miR-6888-3p         | 1 |
| <i>circTTLL7</i> | miR-6888-5p         | 2 |
| <i>circTTLL7</i> | miR-6890-3p         | 1 |
| <i>circTTLL7</i> | miR-6890-5p         | 1 |
| <i>circTTLL7</i> | miR-6895-3p         | 1 |
| <i>circTTLL7</i> | miR-708-3p          | 1 |
| <i>circTTLL7</i> | miR-7108-5p         | 1 |
| <i>circTTLL7</i> | miR-7109-3p         | 4 |
| <i>circTTLL7</i> | miR-7112-5p         | 1 |
| <i>circTTLL7</i> | miR-7152-3p         | 1 |

|                  |              |   |
|------------------|--------------|---|
| <i>circTTLL7</i> | miR-7152-5p  | 1 |
| <i>circTTLL7</i> | miR-7153-3p  | 1 |
| <i>circTTLL7</i> | miR-7154-5p  | 1 |
| <i>circTTLL7</i> | miR-7160-5p  | 3 |
| <i>circTTLL7</i> | miR-7161-3p  | 1 |
| <i>circTTLL7</i> | miR-7162-3p  | 3 |
| <i>circTTLL7</i> | miR-744-3p   | 2 |
| <i>circTTLL7</i> | miR-760      | 2 |
| <i>circTTLL7</i> | miR-766-3p   | 2 |
| <i>circTTLL7</i> | miR-769-5p   | 2 |
| <i>circTTLL7</i> | miR-7703     | 2 |
| <i>circTTLL7</i> | miR-7705     | 1 |
| <i>circTTLL7</i> | miR-7706     | 1 |
| <i>circTTLL7</i> | miR-7843-3p  | 2 |
| <i>circTTLL7</i> | miR-7844-5p  | 5 |
| <i>circTTLL7</i> | miR-7851-3p  | 2 |
| <i>circTTLL7</i> | miR-7852-3p  | 2 |
| <i>circTTLL7</i> | miR-7855-5p  | 1 |
| <i>circTTLL7</i> | miR-7977     | 2 |
| <i>circTTLL7</i> | miR-8062     | 1 |
| <i>circTTLL7</i> | miR-8076     | 2 |
| <i>circTTLL7</i> | miR-8077     | 3 |
| <i>circTTLL7</i> | miR-8087     | 4 |
| <i>circTTLL7</i> | miR-873-3p   | 1 |
| <i>circTTLL7</i> | miR-873-5p.2 | 2 |
| <i>circTTLL7</i> | miR-875-3p   | 1 |
| <i>circTTLL7</i> | miR-876-3p   | 1 |
| <i>circTTLL7</i> | miR-885-3p   | 1 |
| <i>circTTLL7</i> | miR-887-3p   | 1 |
| <i>circTTLL7</i> | miR-887-5p   | 1 |
| <i>circTTLL7</i> | miR-888-5p   | 1 |
| <i>circTTLL7</i> | miR-889-5p   | 1 |
| <i>circTTLL7</i> | miR-890      | 3 |
| <i>circTTLL7</i> | miR-9-3p     | 3 |
| <i>circTTLL7</i> | miR-9-5p     | 2 |
| <i>circTTLL7</i> | miR-93-3p    | 1 |
| <i>circTTLL7</i> | miR-935      | 2 |
| <i>circTTLL7</i> | miR-939-3p   | 3 |



|                  |                                       |   |
|------------------|---------------------------------------|---|
| <i>circTTLL7</i> | miR-942-5p                            | 1 |
| <i>circTTLL7</i> | miR-99-3p                             | 3 |
| <i>circUBAP2</i> | let-7a-3p/let-7b-3p/let-7f-1-3p/98-3p | 1 |
| <i>circUBAP2</i> | let-7f-2-3p/1185-3p                   | 1 |
| <i>circUBAP2</i> | miR-100-3p                            | 2 |
| <i>circUBAP2</i> | miR-1184                              | 2 |
| <i>circUBAP2</i> | miR-1199-5p/6751-3p                   | 2 |
| <i>circUBAP2</i> | miR-1205                              | 2 |
| <i>circUBAP2</i> | miR-1206                              | 2 |
| <i>circUBAP2</i> | miR-1225-3p                           | 5 |
| <i>circUBAP2</i> | miR-1238-3p                           | 3 |
| <i>circUBAP2</i> | miR-129-3p                            | 2 |
| <i>circUBAP2</i> | miR-130-3p/301-3p/454-3p              | 1 |
| <i>circUBAP2</i> | miR-1324                              | 1 |
| <i>circUBAP2</i> | miR-141-5p                            | 1 |
| <i>circUBAP2</i> | miR-143-5p                            | 4 |
| <i>circUBAP2</i> | miR-145-5p                            | 1 |
| <i>circUBAP2</i> | miR-146a-3p                           | 3 |
| <i>circUBAP2</i> | miR-146b-3p                           | 2 |
| <i>circUBAP2</i> | miR-148-3p/152-3p                     | 1 |
| <i>circUBAP2</i> | miR-148b-5p/6874-3p                   | 3 |
| <i>circUBAP2</i> | miR-151-3p                            | 1 |
| <i>circUBAP2</i> | miR-153-3p                            | 1 |
| <i>circUBAP2</i> | miR-17-3p                             | 2 |
| <i>circUBAP2</i> | miR-181-3p/4420                       | 3 |
| <i>circUBAP2</i> | miR-1825                              | 1 |
| <i>circUBAP2</i> | miR-183-3p                            | 2 |
| <i>circUBAP2</i> | miR-185-3p                            | 3 |
| <i>circUBAP2</i> | miR-1914-5p                           | 2 |
| <i>circUBAP2</i> | miR-1976                              | 3 |
| <i>circUBAP2</i> | miR-198                               | 1 |
| <i>circUBAP2</i> | miR-199-3p                            | 1 |
| <i>circUBAP2</i> | miR-199-5p                            | 1 |
| <i>circUBAP2</i> | miR-2114-3p                           | 1 |
| <i>circUBAP2</i> | miR-2115-3p                           | 3 |
| <i>circUBAP2</i> | miR-214-3p/3619-5p                    | 2 |
| <i>circUBAP2</i> | miR-224-5p                            | 2 |
| <i>circUBAP2</i> | miR-2681-3p                           | 1 |

|                  |                  |   |
|------------------|------------------|---|
| <i>circUBAP2</i> | miR-28-3p        | 1 |
| <i>circUBAP2</i> | miR-3117-5p      | 1 |
| <i>circUBAP2</i> | miR-3121-5p      | 1 |
| <i>circUBAP2</i> | miR-3145-5p      | 1 |
| <i>circUBAP2</i> | miR-3158-5p      | 2 |
| <i>circUBAP2</i> | miR-3166         | 1 |
| <i>circUBAP2</i> | miR-3168         | 3 |
| <i>circUBAP2</i> | miR-3173-5p      | 2 |
| <i>circUBAP2</i> | miR-3193         | 1 |
| <i>circUBAP2</i> | miR-323a-5p      | 2 |
| <i>circUBAP2</i> | miR-330-3p       | 2 |
| <i>circUBAP2</i> | miR-339-5p       | 2 |
| <i>circUBAP2</i> | miR-34b-3p       | 1 |
| <i>circUBAP2</i> | miR-34c-3p       | 1 |
| <i>circUBAP2</i> | miR-3614-3p      | 1 |
| <i>circUBAP2</i> | miR-3653-5p      | 3 |
| <i>circUBAP2</i> | miR-3660/4526    | 1 |
| <i>circUBAP2</i> | miR-374a-3p      | 1 |
| <i>circUBAP2</i> | miR-381-3p       | 1 |
| <i>circUBAP2</i> | miR-3908         | 1 |
| <i>circUBAP2</i> | miR-3914         | 2 |
| <i>circUBAP2</i> | miR-3925-3p      | 2 |
| <i>circUBAP2</i> | miR-3942-5p      | 1 |
| <i>circUBAP2</i> | miR-3944-5p      | 2 |
| <i>circUBAP2</i> | miR-412-5p       | 1 |
| <i>circUBAP2</i> | miR-4256         | 1 |
| <i>circUBAP2</i> | miR-4291         | 1 |
| <i>circUBAP2</i> | miR-4305         | 1 |
| <i>circUBAP2</i> | miR-433-3p       | 1 |
| <i>circUBAP2</i> | miR-4427         | 2 |
| <i>circUBAP2</i> | miR-4452         | 2 |
| <i>circUBAP2</i> | miR-4463         | 1 |
| <i>circUBAP2</i> | miR-448          | 1 |
| <i>circUBAP2</i> | miR-4499         | 1 |
| <i>circUBAP2</i> | miR-449c-3p      | 1 |
| <i>circUBAP2</i> | miR-4513/6855-3p | 1 |
| <i>circUBAP2</i> | miR-4520-3p      | 1 |
| <i>circUBAP2</i> | miR-4540         | 1 |

|                  |                             |   |
|------------------|-----------------------------|---|
| <i>circUBAP2</i> | miR-455-3p.2                | 4 |
| <i>circUBAP2</i> | miR-4652-3p                 | 1 |
| <i>circUBAP2</i> | miR-4661-3p                 | 2 |
| <i>circUBAP2</i> | miR-4666a-3p                | 1 |
| <i>circUBAP2</i> | miR-4677-3p                 | 3 |
| <i>circUBAP2</i> | miR-4679                    | 3 |
| <i>circUBAP2</i> | miR-4680-3p                 | 2 |
| <i>circUBAP2</i> | miR-4680-5p                 | 1 |
| <i>circUBAP2</i> | miR-4687-5p                 | 2 |
| <i>circUBAP2</i> | miR-4700-3p                 | 3 |
| <i>circUBAP2</i> | miR-4704-5p                 | 1 |
| <i>circUBAP2</i> | miR-4724-5p                 | 1 |
| <i>circUBAP2</i> | miR-4733-5p                 | 4 |
| <i>circUBAP2</i> | miR-4743-3p                 | 1 |
| <i>circUBAP2</i> | miR-4766-3p                 | 1 |
| <i>circUBAP2</i> | miR-4771                    | 1 |
| <i>circUBAP2</i> | miR-4777-3p                 | 1 |
| <i>circUBAP2</i> | miR-4778-5p                 | 1 |
| <i>circUBAP2</i> | miR-4789-5p                 | 1 |
| <i>circUBAP2</i> | miR-4790-3p                 | 1 |
| <i>circUBAP2</i> | miR-4802-3p                 | 1 |
| <i>circUBAP2</i> | miR-5000-5p                 | 2 |
| <i>circUBAP2</i> | miR-5007-5p                 | 2 |
| <i>circUBAP2</i> | miR-5008-3p/6737-3p/7157-3p | 1 |
| <i>circUBAP2</i> | miR-508-5p                  | 1 |
| <i>circUBAP2</i> | miR-511-5p                  | 1 |
| <i>circUBAP2</i> | miR-513b-3p                 | 1 |
| <i>circUBAP2</i> | miR-5187-3p                 | 2 |
| <i>circUBAP2</i> | miR-5193                    | 5 |
| <i>circUBAP2</i> | miR-544a                    | 2 |
| <i>circUBAP2</i> | miR-554                     | 1 |
| <i>circUBAP2</i> | miR-5571-5p                 | 1 |
| <i>circUBAP2</i> | miR-5580-3p                 | 1 |
| <i>circUBAP2</i> | miR-5584-3p                 | 3 |
| <i>circUBAP2</i> | miR-5585-3p                 | 1 |
| <i>circUBAP2</i> | miR-5702                    | 2 |
| <i>circUBAP2</i> | miR-589-3p                  | 2 |
| <i>circUBAP2</i> | miR-6071                    | 1 |

|                  |              |   |
|------------------|--------------|---|
| <i>circUBAP2</i> | miR-616-3p   | 1 |
| <i>circUBAP2</i> | miR-622      | 1 |
| <i>circUBAP2</i> | miR-653-3p   | 3 |
| <i>circUBAP2</i> | miR-654-3p   | 1 |
| <i>circUBAP2</i> | miR-660-3p   | 5 |
| <i>circUBAP2</i> | miR-665      | 1 |
| <i>circUBAP2</i> | miR-670-3p   | 3 |
| <i>circUBAP2</i> | miR-6719-3p  | 1 |
| <i>circUBAP2</i> | miR-6723-5p  | 1 |
| <i>circUBAP2</i> | miR-6730-3p  | 1 |
| <i>circUBAP2</i> | miR-6736-3p  | 4 |
| <i>circUBAP2</i> | miR-6738-3p  | 2 |
| <i>circUBAP2</i> | miR-6740-3p  | 2 |
| <i>circUBAP2</i> | miR-6779-3p  | 2 |
| <i>circUBAP2</i> | miR-6780a-3p | 1 |
| <i>circUBAP2</i> | miR-6796-3p  | 2 |
| <i>circUBAP2</i> | miR-6807-5p  | 5 |
| <i>circUBAP2</i> | miR-6828-3p  | 1 |
| <i>circUBAP2</i> | miR-6847-3p  | 1 |
| <i>circUBAP2</i> | miR-6853-3p  | 2 |
| <i>circUBAP2</i> | miR-6854-5p  | 1 |
| <i>circUBAP2</i> | miR-6857-3p  | 1 |
| <i>circUBAP2</i> | miR-6870-3p  | 1 |
| <i>circUBAP2</i> | miR-6881-3p  | 1 |
| <i>circUBAP2</i> | miR-6884-3p  | 3 |
| <i>circUBAP2</i> | miR-6889-3p  | 1 |
| <i>circUBAP2</i> | miR-7111-3p  | 1 |
| <i>circUBAP2</i> | miR-7154-5p  | 1 |
| <i>circUBAP2</i> | miR-759      | 3 |
| <i>circUBAP2</i> | miR-766-3p   | 2 |
| <i>circUBAP2</i> | miR-7976     | 2 |
| <i>circUBAP2</i> | miR-8060     | 1 |
| <i>circUBAP2</i> | miR-8086     | 1 |
| <i>circUBAP2</i> | miR-873-5p.1 | 2 |
| <i>circUBAP2</i> | miR-875-5p   | 1 |
| <i>circUBAP2</i> | miR-876-3p   | 2 |
| <i>circUBAP2</i> | miR-922      | 2 |
| <i>circUBAP2</i> | miR-936      | 1 |

|                  |                      |   |
|------------------|----------------------|---|
| <i>circUBAP2</i> | miR-96-3p            | 1 |
| <i>circUBAP2</i> | miR-99-3p            | 2 |
| <i>circUBAP2</i> | miR-103a-2-5p        | 2 |
| <i>circUBAP2</i> | miR-1208             | 3 |
| <i>circUBAP2</i> | miR-1226-3p          | 4 |
| <i>circUBAP2</i> | miR-1227-5p          | 1 |
| <i>circUBAP2</i> | miR-1231             | 1 |
| <i>circUBAP2</i> | miR-1237-3p          | 1 |
| <i>circUBAP2</i> | miR-1245b-3p         | 2 |
| <i>circUBAP2</i> | miR-1248             | 1 |
| <i>circUBAP2</i> | miR-1254/3116        | 1 |
| <i>circUBAP2</i> | miR-1264             | 1 |
| <i>circUBAP2</i> | miR-1266-5p/4518     | 1 |
| <i>circUBAP2</i> | miR-1270             | 2 |
| <i>circUBAP2</i> | miR-1273c            | 2 |
| <i>circUBAP2</i> | miR-1273g-3p         | 1 |
| <i>circUBAP2</i> | miR-1283             | 1 |
| <i>circUBAP2</i> | miR-1285-5p          | 2 |
| <i>circUBAP2</i> | miR-1289             | 2 |
| <i>circUBAP2</i> | miR-1290             | 1 |
| <i>circUBAP2</i> | miR-1299             | 1 |
| <i>circUBAP2</i> | miR-1301-3p          | 1 |
| <i>circUBAP2</i> | miR-1302/4298        | 1 |
| <i>circUBAP2</i> | miR-1323             | 2 |
| <i>circUBAP2</i> | miR-1343-3p          | 2 |
| <i>circUBAP2</i> | miR-140-3p.1         | 1 |
| <i>circUBAP2</i> | miR-1468-3p          | 2 |
| <i>circUBAP2</i> | miR-1470             | 1 |
| <i>circUBAP2</i> | miR-150-5p           | 1 |
| <i>circUBAP2</i> | miR-154-3p/487-3p    | 1 |
| <i>circUBAP2</i> | miR-15b-3p           | 1 |
| <i>circUBAP2</i> | miR-182-3p           | 1 |
| <i>circUBAP2</i> | miR-183-5p.1         | 1 |
| <i>circUBAP2</i> | miR-185-5p           | 1 |
| <i>circUBAP2</i> | miR-1910-3p/6511a-5p | 2 |
| <i>circUBAP2</i> | miR-1910-5p          | 2 |
| <i>circUBAP2</i> | miR-1911-3p          | 4 |
| <i>circUBAP2</i> | miR-1915-3p/6764-5p  | 2 |

|                  |                     |   |
|------------------|---------------------|---|
| <i>circUBAP2</i> | miR-194-3p          | 1 |
| <i>circUBAP2</i> | miR-197-3p          | 1 |
| <i>circUBAP2</i> | miR-203a-3p.1       | 1 |
| <i>circUBAP2</i> | miR-208-3p          | 1 |
| <i>circUBAP2</i> | miR-208-5p          | 1 |
| <i>circUBAP2</i> | miR-21-3p/3591-3p   | 1 |
| <i>circUBAP2</i> | miR-2114-5p         | 1 |
| <i>circUBAP2</i> | miR-2115-5p         | 1 |
| <i>circUBAP2</i> | miR-2116-3p         | 1 |
| <i>circUBAP2</i> | miR-2116-5p         | 2 |
| <i>circUBAP2</i> | miR-212-5p          | 1 |
| <i>circUBAP2</i> | miR-216a-5p         | 2 |
| <i>circUBAP2</i> | miR-216b-5p         | 2 |
| <i>circUBAP2</i> | miR-218-1-3p        | 1 |
| <i>circUBAP2</i> | miR-218-2-3p        | 1 |
| <i>circUBAP2</i> | miR-219b-5p         | 1 |
| <i>circUBAP2</i> | miR-22-5p           | 2 |
| <i>circUBAP2</i> | miR-223-5p          | 1 |
| <i>circUBAP2</i> | miR-2355-5p         | 2 |
| <i>circUBAP2</i> | miR-24-3p           | 1 |
| <i>circUBAP2</i> | miR-25-5p           | 1 |
| <i>circUBAP2</i> | miR-26b-3p          | 2 |
| <i>circUBAP2</i> | miR-27-3p           | 1 |
| <i>circUBAP2</i> | miR-27b-5p          | 1 |
| <i>circUBAP2</i> | miR-29-3p           | 2 |
| <i>circUBAP2</i> | miR-298             | 1 |
| <i>circUBAP2</i> | miR-29b-1-5p        | 1 |
| <i>circUBAP2</i> | miR-29b-2-5p        | 2 |
| <i>circUBAP2</i> | miR-301a-5p/301b-5p | 1 |
| <i>circUBAP2</i> | miR-302b-5p/302d-5p | 1 |
| <i>circUBAP2</i> | miR-3065-3p         | 3 |
| <i>circUBAP2</i> | miR-3120-3p         | 3 |
| <i>circUBAP2</i> | miR-3121-3p         | 1 |
| <i>circUBAP2</i> | miR-3122/3913-5p    | 1 |
| <i>circUBAP2</i> | miR-3124-3p         | 2 |
| <i>circUBAP2</i> | miR-3140-3p         | 1 |
| <i>circUBAP2</i> | miR-3149            | 1 |
| <i>circUBAP2</i> | miR-3159            | 2 |

|                  |                       |   |
|------------------|-----------------------|---|
| <i>circUBAP2</i> | miR-3162-3p           | 1 |
| <i>circUBAP2</i> | miR-3182              | 1 |
| <i>circUBAP2</i> | miR-3184-3p           | 1 |
| <i>circUBAP2</i> | miR-3189-3p           | 1 |
| <i>circUBAP2</i> | miR-3190-3p           | 1 |
| <i>circUBAP2</i> | miR-3191-5p           | 2 |
| <i>circUBAP2</i> | miR-3194-3p           | 1 |
| <i>circUBAP2</i> | miR-3194-5p           | 2 |
| <i>circUBAP2</i> | miR-3198/4309         | 2 |
| <i>circUBAP2</i> | miR-320               | 1 |
| <i>circUBAP2</i> | miR-326               | 1 |
| <i>circUBAP2</i> | miR-338-3p            | 1 |
| <i>circUBAP2</i> | miR-34-5p/449-5p      | 2 |
| <i>circUBAP2</i> | miR-34a-3p            | 2 |
| <i>circUBAP2</i> | miR-34b-5p/449c-5p    | 2 |
| <i>circUBAP2</i> | miR-3529-3p           | 3 |
| <i>circUBAP2</i> | miR-361-3p            | 2 |
| <i>circUBAP2</i> | miR-3611              | 1 |
| <i>circUBAP2</i> | miR-3613-3p           | 1 |
| <i>circUBAP2</i> | miR-3617-3p           | 2 |
| <i>circUBAP2</i> | miR-3619-3p           | 1 |
| <i>circUBAP2</i> | miR-3622a-3p/3622b-3p | 1 |
| <i>circUBAP2</i> | miR-3649              | 1 |
| <i>circUBAP2</i> | miR-365-3p            | 1 |
| <i>circUBAP2</i> | miR-3658              | 1 |
| <i>circUBAP2</i> | miR-3662              | 1 |
| <i>circUBAP2</i> | miR-3664-3p           | 1 |
| <i>circUBAP2</i> | miR-3667-3p           | 2 |
| <i>circUBAP2</i> | miR-3671              | 2 |
| <i>circUBAP2</i> | miR-3675-3p           | 1 |
| <i>circUBAP2</i> | miR-3680-3p           | 1 |
| <i>circUBAP2</i> | miR-3681-5p           | 1 |
| <i>circUBAP2</i> | miR-3682-5p           | 1 |
| <i>circUBAP2</i> | miR-3683              | 2 |
| <i>circUBAP2</i> | miR-3690              | 1 |
| <i>circUBAP2</i> | miR-3691-3p           | 1 |
| <i>circUBAP2</i> | miR-374c-3p           | 2 |
| <i>circUBAP2</i> | miR-382-3p            | 1 |

|                  |                   |   |
|------------------|-------------------|---|
| <i>circUBAP2</i> | miR-383-3p        | 3 |
| <i>circUBAP2</i> | miR-383-5p.1      | 1 |
| <i>circUBAP2</i> | miR-3909          | 1 |
| <i>circUBAP2</i> | miR-3912-5p       | 1 |
| <i>circUBAP2</i> | miR-3921/4653-5p  | 1 |
| <i>circUBAP2</i> | miR-3934-3p       | 1 |
| <i>circUBAP2</i> | miR-3938          | 1 |
| <i>circUBAP2</i> | miR-3941          | 1 |
| <i>circUBAP2</i> | miR-3943          | 1 |
| <i>circUBAP2</i> | miR-3960/8072     | 1 |
| <i>circUBAP2</i> | miR-3978          | 1 |
| <i>circUBAP2</i> | miR-421           | 1 |
| <i>circUBAP2</i> | miR-4254          | 1 |
| <i>circUBAP2</i> | miR-4260          | 1 |
| <i>circUBAP2</i> | miR-4263          | 1 |
| <i>circUBAP2</i> | miR-4264          | 1 |
| <i>circUBAP2</i> | miR-4267          | 3 |
| <i>circUBAP2</i> | miR-4269/6715b-5p | 4 |
| <i>circUBAP2</i> | miR-4274          | 1 |
| <i>circUBAP2</i> | miR-4277          | 2 |
| <i>circUBAP2</i> | miR-4283          | 1 |
| <i>circUBAP2</i> | miR-4284          | 1 |
| <i>circUBAP2</i> | miR-4294          | 2 |
| <i>circUBAP2</i> | miR-4313          | 1 |
| <i>circUBAP2</i> | miR-4318          | 1 |
| <i>circUBAP2</i> | miR-4323          | 1 |
| <i>circUBAP2</i> | miR-4324          | 2 |
| <i>circUBAP2</i> | miR-4326          | 2 |
| <i>circUBAP2</i> | miR-4327          | 1 |
| <i>circUBAP2</i> | miR-4328          | 2 |
| <i>circUBAP2</i> | miR-4432          | 1 |
| <i>circUBAP2</i> | miR-4436b-5p      | 1 |
| <i>circUBAP2</i> | miR-4437          | 1 |
| <i>circUBAP2</i> | miR-4453/4538     | 2 |
| <i>circUBAP2</i> | miR-4461          | 1 |
| <i>circUBAP2</i> | miR-4470          | 3 |
| <i>circUBAP2</i> | miR-4489          | 1 |
| <i>circUBAP2</i> | miR-450a-1-3p     | 1 |



|                  |                     |   |
|------------------|---------------------|---|
| <i>circUBAP2</i> | miR-450a-2-3p       | 1 |
| <i>circUBAP2</i> | miR-450b-5p         | 1 |
| <i>circUBAP2</i> | miR-4514/4692       | 4 |
| <i>circUBAP2</i> | miR-4519            | 1 |
| <i>circUBAP2</i> | miR-452-5p/892-3p   | 2 |
| <i>circUBAP2</i> | miR-4520-2-3p       | 1 |
| <i>circUBAP2</i> | miR-4524a-3p        | 1 |
| <i>circUBAP2</i> | miR-4524b-3p        | 1 |
| <i>circUBAP2</i> | miR-4529-3p         | 1 |
| <i>circUBAP2</i> | miR-4530            | 1 |
| <i>circUBAP2</i> | miR-4531            | 2 |
| <i>circUBAP2</i> | miR-4535            | 1 |
| <i>circUBAP2</i> | miR-455-3p.1        | 2 |
| <i>circUBAP2</i> | miR-455-5p          | 1 |
| <i>circUBAP2</i> | miR-4639-5p         | 1 |
| <i>circUBAP2</i> | miR-4640-3p         | 1 |
| <i>circUBAP2</i> | miR-4640-5p         | 1 |
| <i>circUBAP2</i> | miR-4643            | 1 |
| <i>circUBAP2</i> | miR-4645-3p         | 1 |
| <i>circUBAP2</i> | miR-4645-5p/4673    | 4 |
| <i>circUBAP2</i> | miR-4660            | 1 |
| <i>circUBAP2</i> | miR-4662-5p         | 2 |
| <i>circUBAP2</i> | miR-4667-3p         | 1 |
| <i>circUBAP2</i> | miR-4670-5p         | 2 |
| <i>circUBAP2</i> | miR-4672            | 1 |
| <i>circUBAP2</i> | miR-4690-3p/5685    | 1 |
| <i>circUBAP2</i> | miR-4691-3p         | 1 |
| <i>circUBAP2</i> | miR-4691-5p/6792-3p | 4 |
| <i>circUBAP2</i> | miR-4694-3p         | 1 |
| <i>circUBAP2</i> | miR-4704-3p         | 2 |
| <i>circUBAP2</i> | miR-4709-5p         | 2 |
| <i>circUBAP2</i> | miR-4711-3p         | 1 |
| <i>circUBAP2</i> | miR-4714-3p         | 2 |
| <i>circUBAP2</i> | miR-4726-3p         | 2 |
| <i>circUBAP2</i> | miR-4733-3p         | 4 |
| <i>circUBAP2</i> | miR-4738-5p         | 2 |
| <i>circUBAP2</i> | miR-4742-5p         | 4 |
| <i>circUBAP2</i> | miR-4755-3p         | 2 |

|                  |                             |   |
|------------------|-----------------------------|---|
| <i>circUBAP2</i> | miR-4762-5p                 | 2 |
| <i>circUBAP2</i> | miR-4768-5p/6833-3p         | 1 |
| <i>circUBAP2</i> | miR-4772-5p                 | 1 |
| <i>circUBAP2</i> | miR-4776-5p                 | 1 |
| <i>circUBAP2</i> | miR-4778-3p                 | 1 |
| <i>circUBAP2</i> | miR-4782-5p/5706            | 1 |
| <i>circUBAP2</i> | miR-4789-3p                 | 1 |
| <i>circUBAP2</i> | miR-4797-3p                 | 1 |
| <i>circUBAP2</i> | miR-4800-3p                 | 1 |
| <i>circUBAP2</i> | miR-488-3p                  | 1 |
| <i>circUBAP2</i> | miR-488-5p                  | 1 |
| <i>circUBAP2</i> | miR-490-3p                  | 2 |
| <i>circUBAP2</i> | miR-492                     | 1 |
| <i>circUBAP2</i> | miR-499a-3p/499b-3p         | 2 |
| <i>circUBAP2</i> | miR-499a-5p                 | 1 |
| <i>circUBAP2</i> | miR-5002-5p                 | 3 |
| <i>circUBAP2</i> | miR-5004-3p                 | 1 |
| <i>circUBAP2</i> | miR-5007-3p                 | 1 |
| <i>circUBAP2</i> | miR-500a-3p                 | 1 |
| <i>circUBAP2</i> | miR-502-5p                  | 1 |
| <i>circUBAP2</i> | miR-505-3p.2                | 1 |
| <i>circUBAP2</i> | miR-507/557                 | 1 |
| <i>circUBAP2</i> | miR-5087                    | 2 |
| <i>circUBAP2</i> | miR-5093                    | 1 |
| <i>circUBAP2</i> | miR-510-3p                  | 2 |
| <i>circUBAP2</i> | miR-5100                    | 1 |
| <i>circUBAP2</i> | miR-513a-5p                 | 1 |
| <i>circUBAP2</i> | miR-513c-5p/514b-5p         | 2 |
| <i>circUBAP2</i> | miR-516a-3p/516b-3p/7162-5p | 1 |
| <i>circUBAP2</i> | miR-516b-5p                 | 1 |
| <i>circUBAP2</i> | miR-518c-5p                 | 1 |
| <i>circUBAP2</i> | miR-5190                    | 1 |
| <i>circUBAP2</i> | miR-5192                    | 1 |
| <i>circUBAP2</i> | miR-5197-5p                 | 1 |
| <i>circUBAP2</i> | miR-519d-5p                 | 1 |
| <i>circUBAP2</i> | miR-522-3p                  | 1 |
| <i>circUBAP2</i> | miR-532-3p                  | 1 |
| <i>circUBAP2</i> | miR-532-5p                  | 1 |

|                  |                                               |   |
|------------------|-----------------------------------------------|---|
| <i>circUBAP2</i> | miR-544b                                      | 2 |
| <i>circUBAP2</i> | miR-545-3p                                    | 1 |
| <i>circUBAP2</i> | miR-548aj-5p/548f-5p/548g-5p/548x-5p          | 2 |
| <i>circUBAP2</i> | miR-548au-3p                                  | 2 |
| <i>circUBAP2</i> | miR-548az-3p/548ar-3p/548a-3p/548e-3p/548f-3p | 2 |
| <i>circUBAP2</i> | miR-548c-3p                                   | 1 |
| <i>circUBAP2</i> | miR-548g-3p                                   | 1 |
| <i>circUBAP2</i> | miR-549a                                      | 2 |
| <i>circUBAP2</i> | miR-5572                                      | 1 |
| <i>circUBAP2</i> | miR-5582-3p                                   | 2 |
| <i>circUBAP2</i> | miR-5588-3p                                   | 1 |
| <i>circUBAP2</i> | miR-5693                                      | 1 |
| <i>circUBAP2</i> | miR-5695                                      | 1 |
| <i>circUBAP2</i> | miR-5697                                      | 1 |
| <i>circUBAP2</i> | miR-575/4676-5p                               | 6 |
| <i>circUBAP2</i> | miR-576-3p                                    | 1 |
| <i>circUBAP2</i> | miR-576-5p                                    | 1 |
| <i>circUBAP2</i> | miR-578                                       | 1 |
| <i>circUBAP2</i> | miR-591                                       | 1 |
| <i>circUBAP2</i> | miR-606                                       | 1 |
| <i>circUBAP2</i> | miR-607                                       | 2 |
| <i>circUBAP2</i> | miR-6128                                      | 1 |
| <i>circUBAP2</i> | miR-617                                       | 1 |
| <i>circUBAP2</i> | miR-619-3p                                    | 1 |
| <i>circUBAP2</i> | miR-630                                       | 1 |
| <i>circUBAP2</i> | miR-632/4288                                  | 1 |
| <i>circUBAP2</i> | miR-634                                       | 2 |
| <i>circUBAP2</i> | miR-635/6774-5p                               | 1 |
| <i>circUBAP2</i> | miR-642a-5p                                   | 1 |
| <i>circUBAP2</i> | miR-643                                       | 1 |
| <i>circUBAP2</i> | miR-649                                       | 2 |
| <i>circUBAP2</i> | miR-6499-3p                                   | 2 |
| <i>circUBAP2</i> | miR-6501-3p                                   | 2 |
| <i>circUBAP2</i> | miR-6505-3p                                   | 1 |
| <i>circUBAP2</i> | miR-6505-5p                                   | 1 |
| <i>circUBAP2</i> | miR-6508-3p                                   | 1 |
| <i>circUBAP2</i> | miR-6509-3p                                   | 1 |
| <i>circUBAP2</i> | miR-6512-5p                                   | 1 |

|                  |                     |   |
|------------------|---------------------|---|
| <i>circUBAP2</i> | miR-6513-5p         | 1 |
| <i>circUBAP2</i> | miR-6514-3p         | 1 |
| <i>circUBAP2</i> | miR-6516-5p         | 1 |
| <i>circUBAP2</i> | miR-659-5p          | 1 |
| <i>circUBAP2</i> | miR-661             | 1 |
| <i>circUBAP2</i> | miR-668-3p          | 2 |
| <i>circUBAP2</i> | miR-6715b-3p        | 1 |
| <i>circUBAP2</i> | miR-6724-5p/6773-5p | 1 |
| <i>circUBAP2</i> | miR-6729-3p         | 3 |
| <i>circUBAP2</i> | miR-6734-3p         | 2 |
| <i>circUBAP2</i> | miR-6740-5p         | 4 |
| <i>circUBAP2</i> | miR-6749-3p         | 4 |
| <i>circUBAP2</i> | miR-6760-3p         | 3 |
| <i>circUBAP2</i> | miR-6764-3p/6824-3p | 1 |
| <i>circUBAP2</i> | miR-6765-3p         | 1 |
| <i>circUBAP2</i> | miR-6768-5p         | 1 |
| <i>circUBAP2</i> | miR-6769a-3p        | 1 |
| <i>circUBAP2</i> | miR-6790-3p         | 1 |
| <i>circUBAP2</i> | miR-6793-3p         | 2 |
| <i>circUBAP2</i> | miR-6798-3p         | 1 |
| <i>circUBAP2</i> | miR-6801-5p         | 1 |
| <i>circUBAP2</i> | miR-6802-3p         | 1 |
| <i>circUBAP2</i> | miR-6809-3p         | 1 |
| <i>circUBAP2</i> | miR-6814-5p         | 1 |
| <i>circUBAP2</i> | miR-6817-3p         | 2 |
| <i>circUBAP2</i> | miR-6821-3p         | 1 |
| <i>circUBAP2</i> | miR-6822-3p         | 1 |
| <i>circUBAP2</i> | miR-6830-3p         | 1 |
| <i>circUBAP2</i> | miR-6838-3p         | 3 |
| <i>circUBAP2</i> | miR-6840-3p         | 2 |
| <i>circUBAP2</i> | miR-6849-3p         | 1 |
| <i>circUBAP2</i> | miR-6856-3p         | 1 |
| <i>circUBAP2</i> | miR-6858-3p         | 6 |
| <i>circUBAP2</i> | miR-6861-3p         | 1 |
| <i>circUBAP2</i> | miR-6865-3p         | 1 |
| <i>circUBAP2</i> | miR-6868-3p         | 2 |
| <i>circUBAP2</i> | miR-6871-3p         | 2 |
| <i>circUBAP2</i> | miR-6873-3p         | 2 |

|                  |                         |   |
|------------------|-------------------------|---|
| <i>circUBAP2</i> | miR-6879-3p             | 1 |
| <i>circUBAP2</i> | miR-6882-5p             | 1 |
| <i>circUBAP2</i> | miR-6888-3p             | 1 |
| <i>circUBAP2</i> | miR-6894-3p             | 1 |
| <i>circUBAP2</i> | miR-7-3p                | 1 |
| <i>circUBAP2</i> | miR-7106-3p             | 1 |
| <i>circUBAP2</i> | miR-7110-3p             | 2 |
| <i>circUBAP2</i> | miR-7156-3p             | 1 |
| <i>circUBAP2</i> | miR-7159-5p             | 1 |
| <i>circUBAP2</i> | miR-760                 | 1 |
| <i>circUBAP2</i> | miR-767-5p              | 3 |
| <i>circUBAP2</i> | miR-770-5p              | 3 |
| <i>circUBAP2</i> | miR-7850-5p             | 5 |
| <i>circUBAP2</i> | miR-7851-3p             | 1 |
| <i>circUBAP2</i> | miR-7856-5p             | 1 |
| <i>circUBAP2</i> | miR-7977                | 6 |
| <i>circUBAP2</i> | miR-8057                | 1 |
| <i>circUBAP2</i> | miR-8066                | 1 |
| <i>circUBAP2</i> | miR-8087                | 1 |
| <i>circUBAP2</i> | miR-875-3p              | 1 |
| <i>circUBAP2</i> | miR-876-5p              | 1 |
| <i>circUBAP2</i> | miR-877-3p              | 1 |
| <i>circUBAP2</i> | miR-887-5p              | 1 |
| <i>circUBAP2</i> | miR-892a                | 1 |
| <i>circUBAP2</i> | miR-935                 | 6 |
| <i>circUBAP2</i> | miR-940/6808-5p/6893-5p | 2 |
| <i>circUBAP2</i> | miR-942-5p              | 1 |
| <i>circUBAP2</i> | miR-103b                | 1 |
| <i>circUBAP2</i> | miR-10a-3p              | 1 |
| <i>circUBAP2</i> | miR-124-5p              | 1 |
| <i>circUBAP2</i> | miR-1243                | 1 |
| <i>circUBAP2</i> | miR-1251-3p             | 1 |
| <i>circUBAP2</i> | miR-1266-3p             | 2 |
| <i>circUBAP2</i> | miR-1269                | 1 |
| <i>circUBAP2</i> | miR-128-3p              | 1 |
| <i>circUBAP2</i> | miR-1288-3p             | 2 |
| <i>circUBAP2</i> | miR-1298-3p             | 1 |
| <i>circUBAP2</i> | miR-130b-5p             | 1 |

|                  |                     |   |
|------------------|---------------------|---|
| <i>circUBAP2</i> | miR-148a-5p         | 1 |
| <i>circUBAP2</i> | miR-183-5p.2        | 1 |
| <i>circUBAP2</i> | miR-1909-3p/6722-3p | 1 |
| <i>circUBAP2</i> | miR-1915-5p         | 1 |
| <i>circUBAP2</i> | miR-193-3p          | 2 |
| <i>circUBAP2</i> | miR-200-3p/429      | 1 |
| <i>circUBAP2</i> | miR-200ab-5p        | 1 |
| <i>circUBAP2</i> | miR-2117            | 1 |
| <i>circUBAP2</i> | miR-214-5p          | 1 |
| <i>circUBAP2</i> | miR-215-3p          | 1 |
| <i>circUBAP2</i> | miR-23-3p           | 1 |
| <i>circUBAP2</i> | miR-2467-3p         | 1 |
| <i>circUBAP2</i> | miR-2682-3p/6781-3p | 1 |
| <i>circUBAP2</i> | miR-27a-5p          | 2 |
| <i>circUBAP2</i> | miR-3065-5p         | 1 |
| <i>circUBAP2</i> | miR-3119            | 1 |
| <i>circUBAP2</i> | miR-3123            | 1 |
| <i>circUBAP2</i> | miR-3126-3p         | 1 |
| <i>circUBAP2</i> | miR-3128            | 2 |
| <i>circUBAP2</i> | miR-3138            | 1 |
| <i>circUBAP2</i> | miR-3158-3p         | 1 |
| <i>circUBAP2</i> | miR-3185            | 1 |
| <i>circUBAP2</i> | miR-3187-3p         | 1 |
| <i>circUBAP2</i> | miR-3199/8052       | 1 |
| <i>circUBAP2</i> | miR-342-3p          | 2 |
| <i>circUBAP2</i> | miR-3654            | 1 |
| <i>circUBAP2</i> | miR-3655            | 1 |
| <i>circUBAP2</i> | miR-365a-5p/365b-5p | 1 |
| <i>circUBAP2</i> | miR-3680-5p         | 1 |
| <i>circUBAP2</i> | miR-376c-3p         | 1 |
| <i>circUBAP2</i> | miR-378-3p          | 1 |
| <i>circUBAP2</i> | miR-378g            | 1 |
| <i>circUBAP2</i> | miR-3918            | 1 |
| <i>circUBAP2</i> | miR-3919            | 1 |
| <i>circUBAP2</i> | miR-3925-5p         | 1 |
| <i>circUBAP2</i> | miR-3926            | 1 |
| <i>circUBAP2</i> | miR-3936            | 1 |
| <i>circUBAP2</i> | miR-3974            | 1 |

|                  |                             |   |
|------------------|-----------------------------|---|
| <i>circUBAP2</i> | miR-412-3p/6754-3p          | 2 |
| <i>circUBAP2</i> | miR-4270/4441/6754-5p       | 1 |
| <i>circUBAP2</i> | miR-4273/7156-5p            | 1 |
| <i>circUBAP2</i> | miR-4279                    | 1 |
| <i>circUBAP2</i> | miR-4293                    | 1 |
| <i>circUBAP2</i> | miR-4312                    | 1 |
| <i>circUBAP2</i> | miR-432-5p                  | 1 |
| <i>circUBAP2</i> | miR-4330                    | 2 |
| <i>circUBAP2</i> | miR-4435                    | 1 |
| <i>circUBAP2</i> | miR-4446-3p                 | 1 |
| <i>circUBAP2</i> | miR-4480                    | 1 |
| <i>circUBAP2</i> | miR-4481/4745-5p            | 1 |
| <i>circUBAP2</i> | miR-4486                    | 1 |
| <i>circUBAP2</i> | miR-4490                    | 1 |
| <i>circUBAP2</i> | miR-4515                    | 2 |
| <i>circUBAP2</i> | miR-452-3p                  | 1 |
| <i>circUBAP2</i> | miR-4638-3p                 | 1 |
| <i>circUBAP2</i> | miR-4642                    | 1 |
| <i>circUBAP2</i> | miR-4662a-3p                | 1 |
| <i>circUBAP2</i> | miR-4677-5p                 | 1 |
| <i>circUBAP2</i> | miR-4685-5p/6837-5p         | 1 |
| <i>circUBAP2</i> | miR-4686                    | 1 |
| <i>circUBAP2</i> | miR-4688/6743-5p            | 1 |
| <i>circUBAP2</i> | miR-4690-5p                 | 1 |
| <i>circUBAP2</i> | miR-4699-5p                 | 1 |
| <i>circUBAP2</i> | miR-4705                    | 1 |
| <i>circUBAP2</i> | miR-4709-3p                 | 1 |
| <i>circUBAP2</i> | miR-4711-5p                 | 1 |
| <i>circUBAP2</i> | miR-4719                    | 1 |
| <i>circUBAP2</i> | miR-4720-5p/4799-3p/5588-5p | 2 |
| <i>circUBAP2</i> | miR-4731-3p/4801            | 1 |
| <i>circUBAP2</i> | miR-4738-3p                 | 1 |
| <i>circUBAP2</i> | miR-4740-5p                 | 2 |
| <i>circUBAP2</i> | miR-4752                    | 1 |
| <i>circUBAP2</i> | miR-4756-3p                 | 1 |
| <i>circUBAP2</i> | miR-4762-3p                 | 1 |
| <i>circUBAP2</i> | miR-4766-5p                 | 1 |
| <i>circUBAP2</i> | miR-4774-5p                 | 1 |

|                  |                                      |   |
|------------------|--------------------------------------|---|
| <i>circUBAP2</i> | miR-4780                             | 1 |
| <i>circUBAP2</i> | miR-4786-3p                          | 2 |
| <i>circUBAP2</i> | miR-4798-3p                          | 1 |
| <i>circUBAP2</i> | miR-4800-5p                          | 1 |
| <i>circUBAP2</i> | miR-4803                             | 1 |
| <i>circUBAP2</i> | miR-483-3p.1                         | 2 |
| <i>circUBAP2</i> | miR-494-3p                           | 1 |
| <i>circUBAP2</i> | miR-495-3p                           | 2 |
| <i>circUBAP2</i> | miR-5003-5p                          | 2 |
| <i>circUBAP2</i> | miR-5009-5p/8058                     | 1 |
| <i>circUBAP2</i> | miR-505-3p.1                         | 1 |
| <i>circUBAP2</i> | miR-5088-5p                          | 1 |
| <i>circUBAP2</i> | miR-513b-5p                          | 2 |
| <i>circUBAP2</i> | miR-5189-3p                          | 1 |
| <i>circUBAP2</i> | miR-5197-3p                          | 1 |
| <i>circUBAP2</i> | miR-525-5p                           | 1 |
| <i>circUBAP2</i> | miR-548at-5p                         | 1 |
| <i>circUBAP2</i> | miR-548az-5p/548t-5p                 | 1 |
| <i>circUBAP2</i> | miR-548m                             | 1 |
| <i>circUBAP2</i> | miR-548n                             | 1 |
| <i>circUBAP2</i> | miR-548s                             | 1 |
| <i>circUBAP2</i> | miR-5586-3p                          | 1 |
| <i>circUBAP2</i> | miR-561-3p                           | 1 |
| <i>circUBAP2</i> | miR-577                              | 1 |
| <i>circUBAP2</i> | miR-588                              | 1 |
| <i>circUBAP2</i> | miR-593-5p                           | 1 |
| <i>circUBAP2</i> | miR-596                              | 1 |
| <i>circUBAP2</i> | miR-6072/6891-3p                     | 1 |
| <i>circUBAP2</i> | miR-6077                             | 2 |
| <i>circUBAP2</i> | miR-6079                             | 2 |
| <i>circUBAP2</i> | miR-6085/6813-5p                     | 1 |
| <i>circUBAP2</i> | miR-612/1285-3p/3187-5p/5189-5p/6860 | 1 |
| <i>circUBAP2</i> | miR-6132/6836-5p                     | 1 |
| <i>circUBAP2</i> | miR-6165                             | 1 |
| <i>circUBAP2</i> | miR-629-3p                           | 1 |
| <i>circUBAP2</i> | miR-6507-5p                          | 1 |
| <i>circUBAP2</i> | miR-6510-5p                          | 1 |
| <i>circUBAP2</i> | miR-653-5p                           | 2 |



|                  |                     |   |
|------------------|---------------------|---|
| <i>circUBAP2</i> | miR-6720-5p         | 1 |
| <i>circUBAP2</i> | miR-6742-3p         | 1 |
| <i>circUBAP2</i> | miR-6753-5p         | 1 |
| <i>circUBAP2</i> | miR-676-5p          | 2 |
| <i>circUBAP2</i> | miR-6772-3p         | 2 |
| <i>circUBAP2</i> | miR-6773-3p         | 1 |
| <i>circUBAP2</i> | miR-6780b-3p        | 1 |
| <i>circUBAP2</i> | miR-6811-3p         | 1 |
| <i>circUBAP2</i> | miR-6819-3p/6877-3p | 2 |
| <i>circUBAP2</i> | miR-6833-5p         | 1 |
| <i>circUBAP2</i> | miR-6836-3p         | 1 |
| <i>circUBAP2</i> | miR-6837-3p         | 2 |
| <i>circUBAP2</i> | miR-6841-3p         | 1 |
| <i>circUBAP2</i> | miR-6852-5p         | 1 |
| <i>circUBAP2</i> | miR-6868-5p         | 2 |
| <i>circUBAP2</i> | miR-6886-3p         | 1 |
| <i>circUBAP2</i> | miR-6890-3p         | 2 |
| <i>circUBAP2</i> | miR-7-5p            | 2 |
| <i>circUBAP2</i> | miR-7109-3p         | 2 |
| <i>circUBAP2</i> | miR-7112-3p         | 1 |
| <i>circUBAP2</i> | miR-7113-5p         | 1 |
| <i>circUBAP2</i> | miR-7114-5p         | 1 |
| <i>circUBAP2</i> | miR-7150            | 1 |
| <i>circUBAP2</i> | miR-7641            | 1 |
| <i>circUBAP2</i> | miR-767-3p          | 1 |
| <i>circUBAP2</i> | miR-7705            | 1 |
| <i>circUBAP2</i> | miR-7845-5p         | 1 |
| <i>circUBAP2</i> | miR-8084            | 1 |
| <i>circUBAP2</i> | miR-885-3p          | 1 |
| <i>circUBAP2</i> | miR-9-5p            | 1 |
| <i>circUBAP2</i> | miR-938             | 1 |
| <i>circUBAP2</i> | miR-939-3p          | 1 |
| <i>circUBAP2</i> | miR-1178-3p         | 1 |
| <i>circUBAP2</i> | miR-1204            | 1 |
| <i>circUBAP2</i> | miR-1207-5p/4763-3p | 1 |
| <i>circUBAP2</i> | miR-1226-5p         | 1 |
| <i>circUBAP2</i> | miR-1233-5p/6778-5p | 1 |
| <i>circUBAP2</i> | miR-1244            | 1 |

|                  |                                    |   |
|------------------|------------------------------------|---|
| <i>circUBAP2</i> | miR-1247-3p                        | 1 |
| <i>circUBAP2</i> | miR-1273h-3p                       | 2 |
| <i>circUBAP2</i> | miR-1286                           | 1 |
| <i>circUBAP2</i> | miR-1292-5p                        | 1 |
| <i>circUBAP2</i> | miR-1306-3p                        | 1 |
| <i>circUBAP2</i> | miR-134-3p                         | 1 |
| <i>circUBAP2</i> | miR-139-5p                         | 1 |
| <i>circUBAP2</i> | miR-147a                           | 2 |
| <i>circUBAP2</i> | miR-152-5p                         | 1 |
| <i>circUBAP2</i> | miR-202-3p                         | 1 |
| <i>circUBAP2</i> | miR-22-3p                          | 1 |
| <i>circUBAP2</i> | miR-26-3p                          | 1 |
| <i>circUBAP2</i> | miR-29a-5p                         | 1 |
| <i>circUBAP2</i> | miR-3126-5p                        | 2 |
| <i>circUBAP2</i> | miR-3202                           | 1 |
| <i>circUBAP2</i> | miR-320e                           | 1 |
| <i>circUBAP2</i> | miR-325                            | 1 |
| <i>circUBAP2</i> | miR-3620-3p                        | 1 |
| <i>circUBAP2</i> | miR-3678-3p                        | 2 |
| <i>circUBAP2</i> | miR-3688-5p                        | 1 |
| <i>circUBAP2</i> | miR-3911                           | 1 |
| <i>circUBAP2</i> | miR-3920                           | 1 |
| <i>circUBAP2</i> | miR-3928-5p/6806-3p                | 1 |
| <i>circUBAP2</i> | miR-3942-3p                        | 1 |
| <i>circUBAP2</i> | miR-411-5p.2                       | 1 |
| <i>circUBAP2</i> | miR-423-5p                         | 1 |
| <i>circUBAP2</i> | miR-4257                           | 1 |
| <i>circUBAP2</i> | miR-4265/4296/4322                 | 1 |
| <i>circUBAP2</i> | miR-4419a/4510/6127/6129/6130/6133 | 2 |
| <i>circUBAP2</i> | miR-4471/8059                      | 1 |
| <i>circUBAP2</i> | miR-4476/6876-5p                   | 1 |
| <i>circUBAP2</i> | miR-4494                           | 1 |
| <i>circUBAP2</i> | miR-4533                           | 1 |
| <i>circUBAP2</i> | miR-4648                           | 1 |
| <i>circUBAP2</i> | miR-4654/4769-5p                   | 1 |
| <i>circUBAP2</i> | miR-466                            | 2 |
| <i>circUBAP2</i> | miR-4722-5p                        | 1 |
| <i>circUBAP2</i> | miR-4729                           | 1 |

|                  |                     |   |
|------------------|---------------------|---|
| <i>circUBAP2</i> | miR-4736            | 1 |
| <i>circUBAP2</i> | miR-4739            | 1 |
| <i>circUBAP2</i> | miR-4747-5p/5196-5p | 1 |
| <i>circUBAP2</i> | miR-4804-5p         | 1 |
| <i>circUBAP2</i> | miR-486-3p          | 1 |
| <i>circUBAP2</i> | miR-493-3p          | 1 |
| <i>circUBAP2</i> | miR-499b-5p         | 1 |
| <i>circUBAP2</i> | miR-500a-5p         | 1 |
| <i>circUBAP2</i> | miR-504-3p          | 1 |
| <i>circUBAP2</i> | miR-506-5p          | 1 |
| <i>circUBAP2</i> | miR-511-3p          | 1 |
| <i>circUBAP2</i> | miR-5194            | 1 |
| <i>circUBAP2</i> | miR-5584-5p         | 1 |
| <i>circUBAP2</i> | miR-5683            | 1 |
| <i>circUBAP2</i> | miR-597-3p          | 1 |
| <i>circUBAP2</i> | miR-628-3p          | 1 |
| <i>circUBAP2</i> | miR-644a            | 1 |
| <i>circUBAP2</i> | miR-671-5p          | 1 |
| <i>circUBAP2</i> | miR-6721-5p         | 1 |
| <i>circUBAP2</i> | miR-6731-3p         | 1 |
| <i>circUBAP2</i> | miR-6731-5p/8085    | 1 |
| <i>circUBAP2</i> | miR-6734-5p         | 1 |
| <i>circUBAP2</i> | miR-6750-5p/6822-5p | 1 |
| <i>circUBAP2</i> | miR-6759-5p         | 1 |
| <i>circUBAP2</i> | miR-6760-5p         | 1 |
| <i>circUBAP2</i> | miR-6796-5p         | 1 |
| <i>circUBAP2</i> | miR-6818-5p         | 2 |
| <i>circUBAP2</i> | miR-6827-5p         | 1 |
| <i>circUBAP2</i> | miR-6828-5p         | 1 |
| <i>circUBAP2</i> | miR-6834-5p         | 1 |
| <i>circUBAP2</i> | miR-6847-5p         | 1 |
| <i>circUBAP2</i> | miR-6867-5p         | 1 |
| <i>circUBAP2</i> | miR-6873-5p         | 2 |
| <i>circUBAP2</i> | miR-6878-5p         | 1 |
| <i>circUBAP2</i> | miR-873-5p.2        | 1 |
| <i>circUBAP2</i> | miR-891a-3p         | 1 |
| <i>circUBAP2</i> | miR-892-5p          | 1 |
| <i>circUBAP2</i> | miR-892b            | 1 |

|                  |                     |   |
|------------------|---------------------|---|
| <i>circUBAP2</i> | miR-942-3p          | 1 |
| <i>circUBAP2</i> | miR-9500            | 1 |
| <i>circUBE3A</i> | let-7-5p/98-5p      | 3 |
| <i>circUBE3A</i> | miR-10-5p           | 2 |
| <i>circUBE3A</i> | miR-100-3p          | 1 |
| <i>circUBE3A</i> | miR-101-3p.1        | 3 |
| <i>circUBE3A</i> | miR-101-3p.2        | 7 |
| <i>circUBE3A</i> | miR-101-5p          | 3 |
| <i>circUBE3A</i> | miR-105-5p          | 1 |
| <i>circUBE3A</i> | miR-106b-3p         | 4 |
| <i>circUBE3A</i> | miR-1178-5p         | 4 |
| <i>circUBE3A</i> | miR-1180-5p         | 1 |
| <i>circUBE3A</i> | miR-1182            | 4 |
| <i>circUBE3A</i> | miR-1184            | 2 |
| <i>circUBE3A</i> | miR-1197            | 1 |
| <i>circUBE3A</i> | miR-1199-5p/6751-3p | 1 |
| <i>circUBE3A</i> | miR-1200            | 1 |
| <i>circUBE3A</i> | miR-1202/3972       | 2 |
| <i>circUBE3A</i> | miR-1205            | 2 |
| <i>circUBE3A</i> | miR-1207-3p         | 4 |
| <i>circUBE3A</i> | miR-122-5p          | 4 |
| <i>circUBE3A</i> | miR-1224-3p         | 2 |
| <i>circUBE3A</i> | miR-1225-3p         | 2 |
| <i>circUBE3A</i> | miR-1226-3p         | 4 |
| <i>circUBE3A</i> | miR-1227-3p         | 2 |
| <i>circUBE3A</i> | miR-1228-3p         | 2 |
| <i>circUBE3A</i> | miR-1229-3p         | 1 |
| <i>circUBE3A</i> | miR-1231            | 6 |
| <i>circUBE3A</i> | miR-1236-3p         | 8 |
| <i>circUBE3A</i> | miR-1237-3p         | 2 |
| <i>circUBE3A</i> | miR-124-3p.1        | 1 |
| <i>circUBE3A</i> | miR-124-5p          | 1 |
| <i>circUBE3A</i> | miR-1243            | 1 |
| <i>circUBE3A</i> | miR-1244            | 1 |
| <i>circUBE3A</i> | miR-1247-3p         | 2 |
| <i>circUBE3A</i> | miR-1248            | 2 |
| <i>circUBE3A</i> | miR-1249-5p/6797-5p | 4 |
| <i>circUBE3A</i> | miR-125-5p          | 2 |

|                  |                          |   |
|------------------|--------------------------|---|
| <i>circUBE3A</i> | miR-1250-3p              | 6 |
| <i>circUBE3A</i> | miR-1251-3p              | 1 |
| <i>circUBE3A</i> | miR-1252-3p              | 5 |
| <i>circUBE3A</i> | miR-1253                 | 3 |
| <i>circUBE3A</i> | miR-1255a/1255b-5p       | 1 |
| <i>circUBE3A</i> | miR-126-5p               | 2 |
| <i>circUBE3A</i> | miR-1260a/1260b          | 1 |
| <i>circUBE3A</i> | miR-1262/4701-3p/6736-5p | 1 |
| <i>circUBE3A</i> | miR-1263                 | 4 |
| <i>circUBE3A</i> | miR-1265                 | 4 |
| <i>circUBE3A</i> | miR-1266-3p              | 3 |
| <i>circUBE3A</i> | miR-1267                 | 1 |
| <i>circUBE3A</i> | miR-127-5p               | 3 |
| <i>circUBE3A</i> | miR-1270                 | 8 |
| <i>circUBE3A</i> | miR-1276                 | 1 |
| <i>circUBE3A</i> | miR-1277-5p              | 2 |
| <i>circUBE3A</i> | miR-1279                 | 3 |
| <i>circUBE3A</i> | miR-128-3p               | 1 |
| <i>circUBE3A</i> | miR-1285-5p              | 1 |
| <i>circUBE3A</i> | miR-1286                 | 3 |
| <i>circUBE3A</i> | miR-1287-5p              | 6 |
| <i>circUBE3A</i> | miR-1288-5p              | 3 |
| <i>circUBE3A</i> | miR-129-5p               | 5 |
| <i>circUBE3A</i> | miR-1292-5p              | 2 |
| <i>circUBE3A</i> | miR-1295b-5p/1912        | 1 |
| <i>circUBE3A</i> | miR-1296-3p              | 1 |
| <i>circUBE3A</i> | miR-1298-5p              | 2 |
| <i>circUBE3A</i> | miR-130-3p/301-3p/454-3p | 1 |
| <i>circUBE3A</i> | miR-1302/4298            | 1 |
| <i>circUBE3A</i> | miR-1303                 | 1 |
| <i>circUBE3A</i> | miR-1304-3p              | 1 |
| <i>circUBE3A</i> | miR-1305                 | 5 |
| <i>circUBE3A</i> | miR-1306-5p              | 1 |
| <i>circUBE3A</i> | miR-130b-5p              | 2 |
| <i>circUBE3A</i> | miR-132-3p/212-3p        | 1 |
| <i>circUBE3A</i> | miR-1323                 | 1 |
| <i>circUBE3A</i> | miR-1324                 | 2 |
| <i>circUBE3A</i> | miR-133a-3p.1            | 1 |

|                  |                                      |   |
|------------------|--------------------------------------|---|
| <i>circUBE3A</i> | miR-133a-5p                          | 9 |
| <i>circUBE3A</i> | miR-134-5p                           | 2 |
| <i>circUBE3A</i> | miR-136-5p                           | 1 |
| <i>circUBE3A</i> | miR-138-5p                           | 9 |
| <i>circUBE3A</i> | miR-139-3p                           | 5 |
| <i>circUBE3A</i> | miR-140-3p.1                         | 2 |
| <i>circUBE3A</i> | miR-140-3p.2                         | 2 |
| <i>circUBE3A</i> | miR-141-5p                           | 2 |
| <i>circUBE3A</i> | miR-143-5p                           | 4 |
| <i>circUBE3A</i> | miR-144-3p                           | 3 |
| <i>circUBE3A</i> | miR-146-5p                           | 3 |
| <i>circUBE3A</i> | miR-146a-3p                          | 2 |
| <i>circUBE3A</i> | miR-1470                             | 1 |
| <i>circUBE3A</i> | miR-148-3p/152-3p                    | 2 |
| <i>circUBE3A</i> | miR-148a-5p                          | 1 |
| <i>circUBE3A</i> | miR-148b-5p/6874-3p                  | 1 |
| <i>circUBE3A</i> | miR-15-5p/16-5p/195-5p/424-5p/497-5p | 2 |
| <i>circUBE3A</i> | miR-150-3p                           | 4 |
| <i>circUBE3A</i> | miR-150-5p                           | 3 |
| <i>circUBE3A</i> | miR-151-3p                           | 3 |
| <i>circUBE3A</i> | miR-153-3p                           | 1 |
| <i>circUBE3A</i> | miR-153-5p                           | 4 |
| <i>circUBE3A</i> | miR-154-3p/487-3p                    | 1 |
| <i>circUBE3A</i> | miR-154-5p                           | 2 |
| <i>circUBE3A</i> | miR-1587/3620-5p                     | 1 |
| <i>circUBE3A</i> | miR-16-1-3p                          | 6 |
| <i>circUBE3A</i> | miR-17-3p                            | 2 |
| <i>circUBE3A</i> | miR-17-5p/20-5p/93-5p/106-5p/519-3p  | 2 |
| <i>circUBE3A</i> | miR-181-3p/4420                      | 1 |
| <i>circUBE3A</i> | miR-181a-3p                          | 1 |
| <i>circUBE3A</i> | miR-182-5p                           | 1 |
| <i>circUBE3A</i> | miR-1825                             | 4 |
| <i>circUBE3A</i> | miR-183-3p                           | 6 |
| <i>circUBE3A</i> | miR-183-5p.2                         | 1 |
| <i>circUBE3A</i> | miR-186-5p                           | 2 |
| <i>circUBE3A</i> | miR-188-3p                           | 1 |
| <i>circUBE3A</i> | miR-19-5p                            | 6 |
| <i>circUBE3A</i> | miR-1909-5p                          | 1 |

|                  |                     |   |
|------------------|---------------------|---|
| <i>circUBE3A</i> | miR-190a-3p         | 2 |
| <i>circUBE3A</i> | miR-1911-3p         | 1 |
| <i>circUBE3A</i> | miR-1915-3p/6764-5p | 3 |
| <i>circUBE3A</i> | miR-192-3p          | 1 |
| <i>circUBE3A</i> | miR-192-5p/215-5p   | 3 |
| <i>circUBE3A</i> | miR-193b-5p         | 1 |
| <i>circUBE3A</i> | miR-194-3p          | 4 |
| <i>circUBE3A</i> | miR-194-5p          | 1 |
| <i>circUBE3A</i> | miR-196-5p          | 2 |
| <i>circUBE3A</i> | miR-197-3p          | 1 |
| <i>circUBE3A</i> | miR-1976            | 1 |
| <i>circUBE3A</i> | miR-199-5p          | 4 |
| <i>circUBE3A</i> | miR-200c-5p/550a-3p | 2 |
| <i>circUBE3A</i> | miR-202-5p          | 2 |
| <i>circUBE3A</i> | miR-203b-3p         | 2 |
| <i>circUBE3A</i> | miR-203b-5p/6718-5p | 1 |
| <i>circUBE3A</i> | miR-204-3p/4646-5p  | 6 |
| <i>circUBE3A</i> | miR-204-5p/211-5p   | 1 |
| <i>circUBE3A</i> | miR-205-3p          | 2 |
| <i>circUBE3A</i> | miR-2052            | 6 |
| <i>circUBE3A</i> | miR-2053            | 1 |
| <i>circUBE3A</i> | miR-208-3p          | 1 |
| <i>circUBE3A</i> | miR-208-5p          | 1 |
| <i>circUBE3A</i> | miR-20a-3p          | 2 |
| <i>circUBE3A</i> | miR-2113            | 1 |
| <i>circUBE3A</i> | miR-2114-3p         | 1 |
| <i>circUBE3A</i> | miR-2116-3p         | 3 |
| <i>circUBE3A</i> | miR-214-3p/3619-5p  | 2 |
| <i>circUBE3A</i> | miR-217             | 2 |
| <i>circUBE3A</i> | miR-219a-2-3p       | 1 |
| <i>circUBE3A</i> | miR-219b-3p         | 1 |
| <i>circUBE3A</i> | miR-219b-5p         | 2 |
| <i>circUBE3A</i> | miR-22-3p           | 3 |
| <i>circUBE3A</i> | miR-221-5p/8073     | 1 |
| <i>circUBE3A</i> | miR-223-5p          | 1 |
| <i>circUBE3A</i> | miR-224-5p          | 2 |
| <i>circUBE3A</i> | miR-2276-3p         | 2 |
| <i>circUBE3A</i> | miR-2276-5p         | 1 |

|                  |                                              |   |
|------------------|----------------------------------------------|---|
| <i>circUBE3A</i> | miR-23-3p                                    | 1 |
| <i>circUBE3A</i> | miR-24-3p                                    | 1 |
| <i>circUBE3A</i> | miR-24-5p                                    | 1 |
| <i>circUBE3A</i> | miR-25-3p/32-5p/92-3p/363-3p/367-3p          | 1 |
| <i>circUBE3A</i> | miR-26-5p                                    | 2 |
| <i>circUBE3A</i> | miR-2681-3p                                  | 2 |
| <i>circUBE3A</i> | miR-2681-5p                                  | 2 |
| <i>circUBE3A</i> | miR-2682-3p/6781-3p                          | 1 |
| <i>circUBE3A</i> | miR-27-3p                                    | 1 |
| <i>circUBE3A</i> | miR-28-5p/708-5p                             | 1 |
| <i>circUBE3A</i> | miR-2909                                     | 1 |
| <i>circUBE3A</i> | miR-299-5p                                   | 4 |
| <i>circUBE3A</i> | miR-29a-5p                                   | 1 |
| <i>circUBE3A</i> | miR-29b-1-5p                                 | 1 |
| <i>circUBE3A</i> | miR-29b-2-5p                                 | 2 |
| <i>circUBE3A</i> | miR-30-3p                                    | 2 |
| <i>circUBE3A</i> | miR-302-3p/372-3p/373-3p/520-3p              | 1 |
| <i>circUBE3A</i> | miR-302a-5p                                  | 2 |
| <i>circUBE3A</i> | miR-302b-5p/302d-5p                          | 1 |
| <i>circUBE3A</i> | miR-302c-3p.2/520-3p                         | 1 |
| <i>circUBE3A</i> | miR-302f                                     | 1 |
| <i>circUBE3A</i> | miR-30b-3p/1273h-5p/3689-3p/6779-5p/6780a-5p | 5 |
| <i>circUBE3A</i> | miR-30c-3p/6788-5p                           | 5 |
| <i>circUBE3A</i> | miR-31-3p                                    | 1 |
| <i>circUBE3A</i> | miR-3120-5p                                  | 5 |
| <i>circUBE3A</i> | miR-3121-3p                                  | 1 |
| <i>circUBE3A</i> | miR-3121-5p                                  | 1 |
| <i>circUBE3A</i> | miR-3122/3913-5p                             | 2 |
| <i>circUBE3A</i> | miR-3124-3p                                  | 1 |
| <i>circUBE3A</i> | miR-3128                                     | 1 |
| <i>circUBE3A</i> | miR-3130-3p                                  | 3 |
| <i>circUBE3A</i> | miR-3130-5p/4482-5p                          | 1 |
| <i>circUBE3A</i> | miR-3133                                     | 2 |
| <i>circUBE3A</i> | miR-3134                                     | 3 |
| <i>circUBE3A</i> | miR-3135b                                    | 6 |
| <i>circUBE3A</i> | miR-3145-5p                                  | 1 |
| <i>circUBE3A</i> | miR-3148                                     | 1 |
| <i>circUBE3A</i> | miR-3150a-5p/3150b-5p                        | 4 |



|                  |                           |   |
|------------------|---------------------------|---|
| <i>circUBE3A</i> | miR-3152-3p               | 3 |
| <i>circUBE3A</i> | miR-3156-3p               | 1 |
| <i>circUBE3A</i> | miR-3157-5p               | 1 |
| <i>circUBE3A</i> | miR-3158-5p               | 2 |
| <i>circUBE3A</i> | miR-3159                  | 1 |
| <i>circUBE3A</i> | miR-3161                  | 1 |
| <i>circUBE3A</i> | miR-3162-5p               | 1 |
| <i>circUBE3A</i> | miR-3163                  | 1 |
| <i>circUBE3A</i> | miR-3164                  | 2 |
| <i>circUBE3A</i> | miR-3165                  | 5 |
| <i>circUBE3A</i> | miR-3168                  | 1 |
| <i>circUBE3A</i> | miR-3170/6855-5p          | 9 |
| <i>circUBE3A</i> | miR-3171                  | 1 |
| <i>circUBE3A</i> | miR-3173-3p/6891-5p       | 3 |
| <i>circUBE3A</i> | miR-3174                  | 2 |
| <i>circUBE3A</i> | miR-3180-5p               | 1 |
| <i>circUBE3A</i> | miR-3182                  | 7 |
| <i>circUBE3A</i> | miR-3183/4723-3p/6769b-3p | 2 |
| <i>circUBE3A</i> | miR-3187-3p               | 2 |
| <i>circUBE3A</i> | miR-3192-3p               | 5 |
| <i>circUBE3A</i> | miR-3192-5p               | 6 |
| <i>circUBE3A</i> | miR-3194-3p               | 3 |
| <i>circUBE3A</i> | miR-3194-5p               | 4 |
| <i>circUBE3A</i> | miR-3198/4309             | 1 |
| <i>circUBE3A</i> | miR-3199/8052             | 2 |
| <i>circUBE3A</i> | miR-32-3p                 | 6 |
| <i>circUBE3A</i> | miR-320                   | 2 |
| <i>circUBE3A</i> | miR-3200-3p               | 1 |
| <i>circUBE3A</i> | miR-3200-5p               | 4 |
| <i>circUBE3A</i> | miR-320e                  | 5 |
| <i>circUBE3A</i> | miR-323a-5p               | 1 |
| <i>circUBE3A</i> | miR-325                   | 1 |
| <i>circUBE3A</i> | miR-329-3p/362-3p         | 1 |
| <i>circUBE3A</i> | miR-329-5p                | 1 |
| <i>circUBE3A</i> | miR-33-5p                 | 2 |
| <i>circUBE3A</i> | miR-330-3p                | 2 |
| <i>circUBE3A</i> | miR-337-3p                | 1 |
| <i>circUBE3A</i> | miR-338-3p                | 3 |

|                  |                           |   |
|------------------|---------------------------|---|
| <i>circUBE3A</i> | miR-339-5p                | 1 |
| <i>circUBE3A</i> | miR-33a-3p                | 1 |
| <i>circUBE3A</i> | miR-33b-3p/515-3p/519e-3p | 2 |
| <i>circUBE3A</i> | miR-34-5p/449-5p          | 1 |
| <i>circUBE3A</i> | miR-340-5p                | 1 |
| <i>circUBE3A</i> | miR-346                   | 1 |
| <i>circUBE3A</i> | miR-3591-5p               | 1 |
| <i>circUBE3A</i> | miR-3607-3p               | 3 |
| <i>circUBE3A</i> | miR-3613-3p               | 5 |
| <i>circUBE3A</i> | miR-3618                  | 1 |
| <i>circUBE3A</i> | miR-362-5p/500b-5p        | 1 |
| <i>circUBE3A</i> | miR-3622a-3p/3622b-3p     | 1 |
| <i>circUBE3A</i> | miR-3622a-5p              | 1 |
| <i>circUBE3A</i> | miR-3646                  | 5 |
| <i>circUBE3A</i> | miR-3650                  | 2 |
| <i>circUBE3A</i> | miR-3651                  | 1 |
| <i>circUBE3A</i> | miR-3652/4430             | 6 |
| <i>circUBE3A</i> | miR-3653-3p               | 1 |
| <i>circUBE3A</i> | miR-3653-5p               | 1 |
| <i>circUBE3A</i> | miR-3654                  | 1 |
| <i>circUBE3A</i> | miR-3655                  | 1 |
| <i>circUBE3A</i> | miR-3658                  | 1 |
| <i>circUBE3A</i> | miR-365a-5p/365b-5p       | 2 |
| <i>circUBE3A</i> | miR-3660/4526             | 1 |
| <i>circUBE3A</i> | miR-3662                  | 6 |
| <i>circUBE3A</i> | miR-3665                  | 2 |
| <i>circUBE3A</i> | miR-3667-5p               | 1 |
| <i>circUBE3A</i> | miR-3668                  | 1 |
| <i>circUBE3A</i> | miR-367-5p                | 1 |
| <i>circUBE3A</i> | miR-3670                  | 1 |
| <i>circUBE3A</i> | miR-3671                  | 2 |
| <i>circUBE3A</i> | miR-3675-5p               | 4 |
| <i>circUBE3A</i> | miR-3677-5p               | 4 |
| <i>circUBE3A</i> | miR-3680-3p               | 3 |
| <i>circUBE3A</i> | miR-3681-5p               | 3 |
| <i>circUBE3A</i> | miR-3682-5p               | 2 |
| <i>circUBE3A</i> | miR-3684                  | 1 |
| <i>circUBE3A</i> | miR-3685                  | 2 |

|                  |                           |   |
|------------------|---------------------------|---|
| <i>circUBE3A</i> | miR-3686                  | 1 |
| <i>circUBE3A</i> | miR-3688-3p               | 1 |
| <i>circUBE3A</i> | miR-3688-5p               | 2 |
| <i>circUBE3A</i> | miR-3689d/6851-5p         | 3 |
| <i>circUBE3A</i> | miR-369-3p                | 2 |
| <i>circUBE3A</i> | miR-3691-3p               | 1 |
| <i>circUBE3A</i> | miR-371-5p                | 4 |
| <i>circUBE3A</i> | miR-3714                  | 1 |
| <i>circUBE3A</i> | miR-371a-3p               | 2 |
| <i>circUBE3A</i> | miR-371b-3p               | 2 |
| <i>circUBE3A</i> | miR-371b-5p/373-5p/616-5p | 4 |
| <i>circUBE3A</i> | miR-372-5p                | 4 |
| <i>circUBE3A</i> | miR-374-5p                | 2 |
| <i>circUBE3A</i> | miR-374-5p/655-3p         | 1 |
| <i>circUBE3A</i> | miR-374a-3p               | 6 |
| <i>circUBE3A</i> | miR-374c-3p               | 1 |
| <i>circUBE3A</i> | miR-375                   | 5 |
| <i>circUBE3A</i> | miR-376-3p                | 2 |
| <i>circUBE3A</i> | miR-376a-2-5p             | 1 |
| <i>circUBE3A</i> | miR-376a-5p               | 1 |
| <i>circUBE3A</i> | miR-377-5p/6086           | 1 |
| <i>circUBE3A</i> | miR-378a-5p               | 1 |
| <i>circUBE3A</i> | miR-378g                  | 1 |
| <i>circUBE3A</i> | miR-378j/6839-5p          | 1 |
| <i>circUBE3A</i> | miR-380-3p                | 1 |
| <i>circUBE3A</i> | miR-380-5p/563            | 1 |
| <i>circUBE3A</i> | miR-381-3p                | 6 |
| <i>circUBE3A</i> | miR-382-3p                | 2 |
| <i>circUBE3A</i> | miR-382-5p                | 1 |
| <i>circUBE3A</i> | miR-383-5p.1              | 1 |
| <i>circUBE3A</i> | miR-383-5p.2              | 4 |
| <i>circUBE3A</i> | miR-384                   | 2 |
| <i>circUBE3A</i> | miR-3908                  | 5 |
| <i>circUBE3A</i> | miR-3909                  | 1 |
| <i>circUBE3A</i> | miR-3910                  | 1 |
| <i>circUBE3A</i> | miR-3913-3p               | 4 |
| <i>circUBE3A</i> | miR-3919                  | 1 |
| <i>circUBE3A</i> | miR-3920                  | 1 |

|                  |                     |   |
|------------------|---------------------|---|
| <i>circUBE3A</i> | miR-3922-5p         | 5 |
| <i>circUBE3A</i> | miR-3923            | 1 |
| <i>circUBE3A</i> | miR-3924            | 1 |
| <i>circUBE3A</i> | miR-3927-3p/6831-5p | 2 |
| <i>circUBE3A</i> | miR-3927-5p         | 1 |
| <i>circUBE3A</i> | miR-3928-5p/6806-3p | 6 |
| <i>circUBE3A</i> | miR-3929/4419b/4478 | 6 |
| <i>circUBE3A</i> | miR-3934-3p         | 2 |
| <i>circUBE3A</i> | miR-3940-5p/4507    | 1 |
| <i>circUBE3A</i> | miR-3942-3p         | 3 |
| <i>circUBE3A</i> | miR-3942-5p         | 5 |
| <i>circUBE3A</i> | miR-3944-5p         | 1 |
| <i>circUBE3A</i> | miR-3973            | 3 |
| <i>circUBE3A</i> | miR-3974            | 1 |
| <i>circUBE3A</i> | miR-3978            | 2 |
| <i>circUBE3A</i> | miR-409-3p          | 1 |
| <i>circUBE3A</i> | miR-411-5p.1        | 3 |
| <i>circUBE3A</i> | miR-425-3p          | 1 |
| <i>circUBE3A</i> | miR-425-5p          | 2 |
| <i>circUBE3A</i> | miR-4251            | 2 |
| <i>circUBE3A</i> | miR-4255            | 4 |
| <i>circUBE3A</i> | miR-4256            | 5 |
| <i>circUBE3A</i> | miR-4260            | 5 |
| <i>circUBE3A</i> | miR-4263            | 4 |
| <i>circUBE3A</i> | miR-4264            | 4 |
| <i>circUBE3A</i> | miR-4266            | 1 |
| <i>circUBE3A</i> | miR-4267            | 5 |
| <i>circUBE3A</i> | miR-4268            | 2 |
| <i>circUBE3A</i> | miR-4272            | 1 |
| <i>circUBE3A</i> | miR-4273/7156-5p    | 2 |
| <i>circUBE3A</i> | miR-4276            | 3 |
| <i>circUBE3A</i> | miR-4277            | 1 |
| <i>circUBE3A</i> | miR-4279            | 1 |
| <i>circUBE3A</i> | miR-4282            | 4 |
| <i>circUBE3A</i> | miR-4284            | 1 |
| <i>circUBE3A</i> | miR-4293            | 1 |
| <i>circUBE3A</i> | miR-4299            | 7 |
| <i>circUBE3A</i> | miR-4302            | 3 |

|                  |                    |   |
|------------------|--------------------|---|
| <i>circUBE3A</i> | miR-4303           | 1 |
| <i>circUBE3A</i> | miR-4305           | 2 |
| <i>circUBE3A</i> | miR-4307           | 3 |
| <i>circUBE3A</i> | miR-431-5p         | 1 |
| <i>circUBE3A</i> | miR-4311           | 1 |
| <i>circUBE3A</i> | miR-4314           | 6 |
| <i>circUBE3A</i> | miR-4320           | 1 |
| <i>circUBE3A</i> | miR-4324           | 1 |
| <i>circUBE3A</i> | miR-4327           | 3 |
| <i>circUBE3A</i> | miR-4328           | 2 |
| <i>circUBE3A</i> | miR-4329           | 2 |
| <i>circUBE3A</i> | miR-4330           | 4 |
| <i>circUBE3A</i> | miR-4423-5p        | 1 |
| <i>circUBE3A</i> | miR-4424           | 4 |
| <i>circUBE3A</i> | miR-4428           | 3 |
| <i>circUBE3A</i> | miR-4432           | 1 |
| <i>circUBE3A</i> | miR-4433a-3p       | 3 |
| <i>circUBE3A</i> | miR-4433b-3p       | 3 |
| <i>circUBE3A</i> | miR-4434/4516/5703 | 6 |
| <i>circUBE3A</i> | miR-4435           | 2 |
| <i>circUBE3A</i> | miR-4437           | 1 |
| <i>circUBE3A</i> | miR-4443           | 7 |
| <i>circUBE3A</i> | miR-4446-5p        | 3 |
| <i>circUBE3A</i> | miR-4448           | 2 |
| <i>circUBE3A</i> | miR-4452           | 6 |
| <i>circUBE3A</i> | miR-4453/4538      | 4 |
| <i>circUBE3A</i> | miR-4455           | 1 |
| <i>circUBE3A</i> | miR-4456           | 7 |
| <i>circUBE3A</i> | miR-4457           | 5 |
| <i>circUBE3A</i> | miR-4459           | 3 |
| <i>circUBE3A</i> | miR-4460           | 1 |
| <i>circUBE3A</i> | miR-4463           | 2 |
| <i>circUBE3A</i> | miR-4464/4748      | 4 |
| <i>circUBE3A</i> | miR-4470           | 1 |
| <i>circUBE3A</i> | miR-4471/8059      | 2 |
| <i>circUBE3A</i> | miR-4477a          | 3 |
| <i>circUBE3A</i> | miR-4477b          | 1 |
| <i>circUBE3A</i> | miR-448            | 1 |

|                  |                       |   |
|------------------|-----------------------|---|
| <i>circUBE3A</i> | miR-4481/4745-5p      | 3 |
| <i>circUBE3A</i> | miR-4482-3p           | 2 |
| <i>circUBE3A</i> | miR-4484              | 1 |
| <i>circUBE3A</i> | miR-4486              | 1 |
| <i>circUBE3A</i> | miR-4490              | 4 |
| <i>circUBE3A</i> | miR-4495              | 1 |
| <i>circUBE3A</i> | miR-4499              | 2 |
| <i>circUBE3A</i> | miR-449c-3p           | 4 |
| <i>circUBE3A</i> | miR-4502              | 7 |
| <i>circUBE3A</i> | miR-4503              | 2 |
| <i>circUBE3A</i> | miR-4504              | 2 |
| <i>circUBE3A</i> | miR-4505/5787         | 6 |
| <i>circUBE3A</i> | miR-4509              | 1 |
| <i>circUBE3A</i> | miR-450a-1-3p         | 2 |
| <i>circUBE3A</i> | miR-450a-2-3p         | 5 |
| <i>circUBE3A</i> | miR-450b-5p           | 3 |
| <i>circUBE3A</i> | miR-4517              | 4 |
| <i>circUBE3A</i> | miR-452-5p/892-3p     | 3 |
| <i>circUBE3A</i> | miR-4522              | 1 |
| <i>circUBE3A</i> | miR-4524-5p           | 2 |
| <i>circUBE3A</i> | miR-4524b-3p          | 1 |
| <i>circUBE3A</i> | miR-4530              | 3 |
| <i>circUBE3A</i> | miR-4531              | 8 |
| <i>circUBE3A</i> | miR-4534/8082         | 3 |
| <i>circUBE3A</i> | miR-4536-5p           | 1 |
| <i>circUBE3A</i> | miR-4540              | 1 |
| <i>circUBE3A</i> | miR-455-3p.2          | 4 |
| <i>circUBE3A</i> | miR-4635              | 1 |
| <i>circUBE3A</i> | miR-4639-5p           | 1 |
| <i>circUBE3A</i> | miR-4642              | 1 |
| <i>circUBE3A</i> | miR-4645-5p/4673      | 1 |
| <i>circUBE3A</i> | miR-4652-3p           | 5 |
| <i>circUBE3A</i> | miR-4659a-3p/4659b-3p | 3 |
| <i>circUBE3A</i> | miR-4660              | 2 |
| <i>circUBE3A</i> | miR-4661-3p           | 1 |
| <i>circUBE3A</i> | miR-4662a-3p          | 1 |
| <i>circUBE3A</i> | miR-4663              | 1 |
| <i>circUBE3A</i> | miR-4666a-3p          | 6 |

|                  |                             |   |
|------------------|-----------------------------|---|
| <i>circUBE3A</i> | miR-4666a-5p                | 4 |
| <i>circUBE3A</i> | miR-4667-3p                 | 1 |
| <i>circUBE3A</i> | miR-4668-3p                 | 1 |
| <i>circUBE3A</i> | miR-4670-3p                 | 1 |
| <i>circUBE3A</i> | miR-4674                    | 1 |
| <i>circUBE3A</i> | miR-4677-3p                 | 2 |
| <i>circUBE3A</i> | miR-4677-5p                 | 2 |
| <i>circUBE3A</i> | miR-4679                    | 2 |
| <i>circUBE3A</i> | miR-4680-5p                 | 1 |
| <i>circUBE3A</i> | miR-4683                    | 5 |
| <i>circUBE3A</i> | miR-4686                    | 1 |
| <i>circUBE3A</i> | miR-4690-5p                 | 2 |
| <i>circUBE3A</i> | miR-4693-3p                 | 3 |
| <i>circUBE3A</i> | miR-4693-5p                 | 1 |
| <i>circUBE3A</i> | miR-4694-5p                 | 1 |
| <i>circUBE3A</i> | miR-4695-3p                 | 1 |
| <i>circUBE3A</i> | miR-4696                    | 1 |
| <i>circUBE3A</i> | miR-4698                    | 2 |
| <i>circUBE3A</i> | miR-4699-3p                 | 2 |
| <i>circUBE3A</i> | miR-4699-5p                 | 1 |
| <i>circUBE3A</i> | miR-4700-3p                 | 1 |
| <i>circUBE3A</i> | miR-4705                    | 1 |
| <i>circUBE3A</i> | miR-4709-3p                 | 1 |
| <i>circUBE3A</i> | miR-4711-3p                 | 1 |
| <i>circUBE3A</i> | miR-4714-3p                 | 2 |
| <i>circUBE3A</i> | miR-4720-3p                 | 1 |
| <i>circUBE3A</i> | miR-4720-5p/4799-3p/5588-5p | 1 |
| <i>circUBE3A</i> | miR-4722-5p                 | 3 |
| <i>circUBE3A</i> | miR-4724-3p                 | 2 |
| <i>circUBE3A</i> | miR-4725-5p                 | 1 |
| <i>circUBE3A</i> | miR-4726-3p                 | 3 |
| <i>circUBE3A</i> | miR-4727-3p                 | 1 |
| <i>circUBE3A</i> | miR-4727-5p                 | 4 |
| <i>circUBE3A</i> | miR-4728-3p                 | 7 |
| <i>circUBE3A</i> | miR-4729                    | 2 |
| <i>circUBE3A</i> | miR-4731-5p                 | 1 |
| <i>circUBE3A</i> | miR-4732-3p                 | 2 |
| <i>circUBE3A</i> | miR-4733-3p                 | 4 |

|                  |                     |   |
|------------------|---------------------|---|
| <i>circUBE3A</i> | miR-4733-5p         | 1 |
| <i>circUBE3A</i> | miR-4735-5p         | 1 |
| <i>circUBE3A</i> | miR-4738-3p         | 1 |
| <i>circUBE3A</i> | miR-4743-3p         | 5 |
| <i>circUBE3A</i> | miR-4744            | 1 |
| <i>circUBE3A</i> | miR-4747-5p/5196-5p | 1 |
| <i>circUBE3A</i> | miR-4753-3p         | 5 |
| <i>circUBE3A</i> | miR-4755-5p/5006-3p | 4 |
| <i>circUBE3A</i> | miR-4756-3p         | 1 |
| <i>circUBE3A</i> | miR-4760-3p         | 2 |
| <i>circUBE3A</i> | miR-4760-5p/8061    | 1 |
| <i>circUBE3A</i> | miR-4761-5p         | 3 |
| <i>circUBE3A</i> | miR-4762-3p         | 4 |
| <i>circUBE3A</i> | miR-4762-5p         | 1 |
| <i>circUBE3A</i> | miR-4768-3p         | 3 |
| <i>circUBE3A</i> | miR-4768-5p/6833-3p | 4 |
| <i>circUBE3A</i> | miR-4772-3p         | 2 |
| <i>circUBE3A</i> | miR-4772-5p         | 1 |
| <i>circUBE3A</i> | miR-4773            | 1 |
| <i>circUBE3A</i> | miR-4774-5p         | 4 |
| <i>circUBE3A</i> | miR-4775            | 3 |
| <i>circUBE3A</i> | miR-4777-5p         | 1 |
| <i>circUBE3A</i> | miR-4778-3p         | 3 |
| <i>circUBE3A</i> | miR-4778-5p         | 2 |
| <i>circUBE3A</i> | miR-4781-3p         | 1 |
| <i>circUBE3A</i> | miR-4786-5p         | 5 |
| <i>circUBE3A</i> | miR-4790-3p         | 2 |
| <i>circUBE3A</i> | miR-4793-3p         | 3 |
| <i>circUBE3A</i> | miR-4795-3p         | 3 |
| <i>circUBE3A</i> | miR-4795-5p         | 2 |
| <i>circUBE3A</i> | miR-4796-3p         | 4 |
| <i>circUBE3A</i> | miR-4797-3p         | 4 |
| <i>circUBE3A</i> | miR-4802-3p         | 4 |
| <i>circUBE3A</i> | miR-4802-5p         | 3 |
| <i>circUBE3A</i> | miR-4804-3p         | 1 |
| <i>circUBE3A</i> | miR-483-3p.1        | 1 |
| <i>circUBE3A</i> | miR-483-3p.2        | 1 |
| <i>circUBE3A</i> | miR-484/3155        | 1 |



|                  |                             |   |
|------------------|-----------------------------|---|
| <i>circUBE3A</i> | miR-487a-5p/487b-5p         | 2 |
| <i>circUBE3A</i> | miR-488-3p                  | 1 |
| <i>circUBE3A</i> | miR-489-3p                  | 4 |
| <i>circUBE3A</i> | miR-490-3p                  | 2 |
| <i>circUBE3A</i> | miR-495-3p                  | 1 |
| <i>circUBE3A</i> | miR-495-5p                  | 1 |
| <i>circUBE3A</i> | miR-499a-5p                 | 1 |
| <i>circUBE3A</i> | miR-5000-3p                 | 1 |
| <i>circUBE3A</i> | miR-5000-5p                 | 2 |
| <i>circUBE3A</i> | miR-5001-3p                 | 4 |
| <i>circUBE3A</i> | miR-5002-5p                 | 1 |
| <i>circUBE3A</i> | miR-5003-3p                 | 2 |
| <i>circUBE3A</i> | miR-5006-5p                 | 2 |
| <i>circUBE3A</i> | miR-5007-3p                 | 1 |
| <i>circUBE3A</i> | miR-5009-3p                 | 1 |
| <i>circUBE3A</i> | miR-500a-3p                 | 3 |
| <i>circUBE3A</i> | miR-500a-5p                 | 1 |
| <i>circUBE3A</i> | miR-500b-3p                 | 1 |
| <i>circUBE3A</i> | miR-501-5p                  | 1 |
| <i>circUBE3A</i> | miR-5010-3p                 | 1 |
| <i>circUBE3A</i> | miR-5011-5p                 | 4 |
| <i>circUBE3A</i> | miR-503-5p                  | 2 |
| <i>circUBE3A</i> | miR-504-3p                  | 5 |
| <i>circUBE3A</i> | miR-504-5p.1                | 2 |
| <i>circUBE3A</i> | miR-506-5p                  | 3 |
| <i>circUBE3A</i> | miR-507/557                 | 3 |
| <i>circUBE3A</i> | miR-508-5p                  | 1 |
| <i>circUBE3A</i> | miR-5087                    | 1 |
| <i>circUBE3A</i> | miR-509-3-5p/509-5p/4418    | 2 |
| <i>circUBE3A</i> | miR-509-3p                  | 1 |
| <i>circUBE3A</i> | miR-5093                    | 1 |
| <i>circUBE3A</i> | miR-5094                    | 2 |
| <i>circUBE3A</i> | miR-5095/7151-3p            | 1 |
| <i>circUBE3A</i> | miR-510-3p                  | 2 |
| <i>circUBE3A</i> | miR-5100                    | 4 |
| <i>circUBE3A</i> | miR-511-5p                  | 4 |
| <i>circUBE3A</i> | miR-512-3p                  | 1 |
| <i>circUBE3A</i> | miR-513a-3p/513c-3p/3606-3p | 2 |

|                  |                                                                  |   |
|------------------|------------------------------------------------------------------|---|
| <i>circUBE3A</i> | miR-513a-5p                                                      | 1 |
| <i>circUBE3A</i> | miR-513b-3p                                                      | 1 |
| <i>circUBE3A</i> | miR-513c-5p/514b-5p                                              | 3 |
| <i>circUBE3A</i> | miR-514a-3p                                                      | 1 |
| <i>circUBE3A</i> | miR-5186                                                         | 2 |
| <i>circUBE3A</i> | miR-518d-5p/519-5p                                               | 1 |
| <i>circUBE3A</i> | miR-519-3p                                                       | 1 |
| <i>circUBE3A</i> | miR-5190                                                         | 2 |
| <i>circUBE3A</i> | miR-5193                                                         | 3 |
| <i>circUBE3A</i> | miR-5197-5p                                                      | 2 |
| <i>circUBE3A</i> | miR-520g-3p                                                      | 3 |
| <i>circUBE3A</i> | miR-520g-5p                                                      | 1 |
| <i>circUBE3A</i> | miR-524-5p                                                       | 2 |
| <i>circUBE3A</i> | miR-526b-5p                                                      | 2 |
| <i>circUBE3A</i> | miR-532-3p                                                       | 3 |
| <i>circUBE3A</i> | miR-542-3p                                                       | 2 |
| <i>circUBE3A</i> | miR-543                                                          | 1 |
| <i>circUBE3A</i> | miR-544a                                                         | 3 |
| <i>circUBE3A</i> | miR-544b                                                         | 1 |
| <i>circUBE3A</i> | miR-545-5p                                                       | 2 |
| <i>circUBE3A</i> | miR-548ac/548bb-3p/548d-3p/548h-3p/548z                          | 3 |
| <i>circUBE3A</i> | miR-548ah-5p/3609                                                | 2 |
| <i>circUBE3A</i> | miR-548ai/548ag/548ba/570-5p                                     | 3 |
| <i>circUBE3A</i> | miR-548an                                                        | 1 |
| <i>circUBE3A</i> | miR-548ao-3p                                                     | 1 |
| <i>circUBE3A</i> | miR-548aq-3p/548am-3p/548aj-3p/548ah-3p/548ae-3p/548j-3p/548x-3p | 3 |
| <i>circUBE3A</i> | miR-548at-5p                                                     | 3 |
| <i>circUBE3A</i> | miR-548au-3p                                                     | 1 |
| <i>circUBE3A</i> | miR-548av-5p/548k/8054                                           | 1 |
| <i>circUBE3A</i> | miR-548ay-5p/548au-5p/548as-5p/548ar-5p/548aq-5p/548ap-5p/548am- | 3 |
| <i>circUBE3A</i> | miR-548az-3p/548ar-3p/548a-3p/548e-3p/548f-3p                    | 3 |
| <i>circUBE3A</i> | miR-548az-5p/548t-5p                                             | 1 |
| <i>circUBE3A</i> | miR-548c-3p                                                      | 7 |
| <i>circUBE3A</i> | miR-548g-3p                                                      | 5 |
| <i>circUBE3A</i> | miR-548l                                                         | 1 |
| <i>circUBE3A</i> | miR-548m                                                         | 2 |
| <i>circUBE3A</i> | miR-548n                                                         | 1 |
| <i>circUBE3A</i> | miR-548q                                                         | 7 |

|                  |                 |   |
|------------------|-----------------|---|
| <i>circUBE3A</i> | miR-548s        | 2 |
| <i>circUBE3A</i> | miR-549a        | 2 |
| <i>circUBE3A</i> | miR-550b-3p     | 1 |
| <i>circUBE3A</i> | miR-551b-5p     | 2 |
| <i>circUBE3A</i> | miR-556-3p      | 1 |
| <i>circUBE3A</i> | miR-5571-3p     | 1 |
| <i>circUBE3A</i> | miR-5571-5p     | 1 |
| <i>circUBE3A</i> | miR-5572        | 5 |
| <i>circUBE3A</i> | miR-5579-3p     | 1 |
| <i>circUBE3A</i> | miR-5580-3p     | 2 |
| <i>circUBE3A</i> | miR-5582-3p     | 4 |
| <i>circUBE3A</i> | miR-5582-5p     | 1 |
| <i>circUBE3A</i> | miR-5583-3p     | 4 |
| <i>circUBE3A</i> | miR-5584-3p     | 1 |
| <i>circUBE3A</i> | miR-5584-5p     | 1 |
| <i>circUBE3A</i> | miR-5585-3p     | 1 |
| <i>circUBE3A</i> | miR-5589-3p     | 1 |
| <i>circUBE3A</i> | miR-5589-5p     | 1 |
| <i>circUBE3A</i> | miR-5591-3p     | 5 |
| <i>circUBE3A</i> | miR-561-3p      | 3 |
| <i>circUBE3A</i> | miR-561-5p      | 2 |
| <i>circUBE3A</i> | miR-562         | 2 |
| <i>circUBE3A</i> | miR-564         | 1 |
| <i>circUBE3A</i> | miR-5680        | 3 |
| <i>circUBE3A</i> | miR-5683        | 2 |
| <i>circUBE3A</i> | miR-5684        | 1 |
| <i>circUBE3A</i> | miR-5687        | 1 |
| <i>circUBE3A</i> | miR-569         | 1 |
| <i>circUBE3A</i> | miR-5690        | 2 |
| <i>circUBE3A</i> | miR-5692bc      | 2 |
| <i>circUBE3A</i> | miR-5693        | 4 |
| <i>circUBE3A</i> | miR-5694        | 4 |
| <i>circUBE3A</i> | miR-5696        | 4 |
| <i>circUBE3A</i> | miR-570-3p      | 1 |
| <i>circUBE3A</i> | miR-5701        | 2 |
| <i>circUBE3A</i> | miR-5702        | 4 |
| <i>circUBE3A</i> | miR-574-3p      | 2 |
| <i>circUBE3A</i> | miR-575/4676-5p | 2 |

|                  |                                      |   |
|------------------|--------------------------------------|---|
| <i>circUBE3A</i> | miR-576-3p                           | 1 |
| <i>circUBE3A</i> | miR-576-5p                           | 4 |
| <i>circUBE3A</i> | miR-578                              | 1 |
| <i>circUBE3A</i> | miR-579-3p                           | 4 |
| <i>circUBE3A</i> | miR-581                              | 1 |
| <i>circUBE3A</i> | miR-582-3p                           | 2 |
| <i>circUBE3A</i> | miR-582-5p                           | 7 |
| <i>circUBE3A</i> | miR-583                              | 1 |
| <i>circUBE3A</i> | miR-588                              | 2 |
| <i>circUBE3A</i> | miR-589-5p                           | 3 |
| <i>circUBE3A</i> | miR-590-3p                           | 6 |
| <i>circUBE3A</i> | miR-592                              | 1 |
| <i>circUBE3A</i> | miR-593-5p                           | 1 |
| <i>circUBE3A</i> | miR-595                              | 1 |
| <i>circUBE3A</i> | miR-596                              | 1 |
| <i>circUBE3A</i> | miR-599                              | 1 |
| <i>circUBE3A</i> | miR-600                              | 5 |
| <i>circUBE3A</i> | miR-603                              | 1 |
| <i>circUBE3A</i> | miR-606                              | 1 |
| <i>circUBE3A</i> | miR-6068                             | 1 |
| <i>circUBE3A</i> | miR-607                              | 5 |
| <i>circUBE3A</i> | miR-6071                             | 1 |
| <i>circUBE3A</i> | miR-6072/6891-3p                     | 1 |
| <i>circUBE3A</i> | miR-6074                             | 3 |
| <i>circUBE3A</i> | miR-6077                             | 1 |
| <i>circUBE3A</i> | miR-6079                             | 7 |
| <i>circUBE3A</i> | miR-6083                             | 3 |
| <i>circUBE3A</i> | miR-609                              | 1 |
| <i>circUBE3A</i> | miR-612/1285-3p/3187-5p/5189-5p/6860 | 1 |
| <i>circUBE3A</i> | miR-6124                             | 1 |
| <i>circUBE3A</i> | miR-6128                             | 1 |
| <i>circUBE3A</i> | miR-6131                             | 9 |
| <i>circUBE3A</i> | miR-6165                             | 2 |
| <i>circUBE3A</i> | miR-618                              | 1 |
| <i>circUBE3A</i> | miR-619-3p                           | 1 |
| <i>circUBE3A</i> | miR-619-5p/6506-5p                   | 6 |
| <i>circUBE3A</i> | miR-621                              | 4 |
| <i>circUBE3A</i> | miR-622                              | 3 |

|                  |                  |   |
|------------------|------------------|---|
| <i>circUBE3A</i> | miR-623          | 1 |
| <i>circUBE3A</i> | miR-624-3p       | 6 |
| <i>circUBE3A</i> | miR-627-3p       | 2 |
| <i>circUBE3A</i> | miR-627-5p       | 4 |
| <i>circUBE3A</i> | miR-628-3p       | 1 |
| <i>circUBE3A</i> | miR-628-5p       | 1 |
| <i>circUBE3A</i> | miR-629-5p       | 1 |
| <i>circUBE3A</i> | miR-630          | 2 |
| <i>circUBE3A</i> | miR-632/4288     | 6 |
| <i>circUBE3A</i> | miR-633          | 2 |
| <i>circUBE3A</i> | miR-634          | 3 |
| <i>circUBE3A</i> | miR-635/6774-5p  | 6 |
| <i>circUBE3A</i> | miR-641/3617-5p  | 1 |
| <i>circUBE3A</i> | miR-642-3p       | 1 |
| <i>circUBE3A</i> | miR-642a-5p      | 2 |
| <i>circUBE3A</i> | miR-643          | 2 |
| <i>circUBE3A</i> | miR-646          | 2 |
| <i>circUBE3A</i> | miR-649          | 2 |
| <i>circUBE3A</i> | miR-6499-3p      | 1 |
| <i>circUBE3A</i> | miR-6501-5p      | 1 |
| <i>circUBE3A</i> | miR-6502-3p      | 5 |
| <i>circUBE3A</i> | miR-6503-3p      | 1 |
| <i>circUBE3A</i> | miR-6504-3p      | 2 |
| <i>circUBE3A</i> | miR-6505-5p      | 2 |
| <i>circUBE3A</i> | miR-6507-3p      | 1 |
| <i>circUBE3A</i> | miR-6507-5p      | 2 |
| <i>circUBE3A</i> | miR-6508-5p/8067 | 1 |
| <i>circUBE3A</i> | miR-6509-5p      | 1 |
| <i>circUBE3A</i> | miR-651-5p       | 3 |
| <i>circUBE3A</i> | miR-6510-5p      | 2 |
| <i>circUBE3A</i> | miR-6511-5p      | 3 |
| <i>circUBE3A</i> | miR-6512-5p      | 2 |
| <i>circUBE3A</i> | miR-6513-3p      | 2 |
| <i>circUBE3A</i> | miR-6513-5p      | 2 |
| <i>circUBE3A</i> | miR-6514-5p      | 3 |
| <i>circUBE3A</i> | miR-6515-3p      | 8 |
| <i>circUBE3A</i> | miR-6515-5p      | 7 |
| <i>circUBE3A</i> | miR-6516-3p      | 2 |

|                  |                             |   |
|------------------|-----------------------------|---|
| <i>circUBE3A</i> | miR-6516-5p                 | 4 |
| <i>circUBE3A</i> | miR-653-3p                  | 1 |
| <i>circUBE3A</i> | miR-654-3p                  | 3 |
| <i>circUBE3A</i> | miR-655-5p                  | 1 |
| <i>circUBE3A</i> | miR-656-3p                  | 2 |
| <i>circUBE3A</i> | miR-657                     | 2 |
| <i>circUBE3A</i> | miR-659-3p                  | 3 |
| <i>circUBE3A</i> | miR-660-3p                  | 3 |
| <i>circUBE3A</i> | miR-664a-3p                 | 2 |
| <i>circUBE3A</i> | miR-665                     | 1 |
| <i>circUBE3A</i> | miR-670-5p                  | 1 |
| <i>circUBE3A</i> | miR-671-5p                  | 5 |
| <i>circUBE3A</i> | miR-6719-3p                 | 1 |
| <i>circUBE3A</i> | miR-6720-5p                 | 1 |
| <i>circUBE3A</i> | miR-6723-5p                 | 1 |
| <i>circUBE3A</i> | miR-6726-3p                 | 1 |
| <i>circUBE3A</i> | miR-6728-3p                 | 3 |
| <i>circUBE3A</i> | miR-6730-3p                 | 1 |
| <i>circUBE3A</i> | miR-6731-5p/8085            | 5 |
| <i>circUBE3A</i> | miR-6733-3p                 | 3 |
| <i>circUBE3A</i> | miR-6736-3p                 | 5 |
| <i>circUBE3A</i> | miR-6737-5p/6812-5p/6819-5p | 9 |
| <i>circUBE3A</i> | miR-6738-3p                 | 3 |
| <i>circUBE3A</i> | miR-6740-3p                 | 1 |
| <i>circUBE3A</i> | miR-6740-5p                 | 7 |
| <i>circUBE3A</i> | miR-6741-5p                 | 1 |
| <i>circUBE3A</i> | miR-6744-5p                 | 1 |
| <i>circUBE3A</i> | miR-6748-5p                 | 1 |
| <i>circUBE3A</i> | miR-6750-5p/6822-5p         | 1 |
| <i>circUBE3A</i> | miR-6758-3p                 | 2 |
| <i>circUBE3A</i> | miR-6758-5p/6856-5p         | 2 |
| <i>circUBE3A</i> | miR-6759-3p                 | 2 |
| <i>circUBE3A</i> | miR-676-3p                  | 1 |
| <i>circUBE3A</i> | miR-6761-3p                 | 3 |
| <i>circUBE3A</i> | miR-6761-5p                 | 2 |
| <i>circUBE3A</i> | miR-6765-3p                 | 1 |
| <i>circUBE3A</i> | miR-6768-3p                 | 1 |
| <i>circUBE3A</i> | miR-6770-5p                 | 3 |

|                  |                     |   |
|------------------|---------------------|---|
| <i>circUBE3A</i> | miR-6771-5p         | 1 |
| <i>circUBE3A</i> | miR-6772-5p         | 1 |
| <i>circUBE3A</i> | miR-6778-3p         | 4 |
| <i>circUBE3A</i> | miR-6782-3p         | 2 |
| <i>circUBE3A</i> | miR-6785-3p         | 1 |
| <i>circUBE3A</i> | miR-6787-3p         | 1 |
| <i>circUBE3A</i> | miR-6790-3p         | 1 |
| <i>circUBE3A</i> | miR-6791-3p/6829-3p | 4 |
| <i>circUBE3A</i> | miR-6793-5p         | 1 |
| <i>circUBE3A</i> | miR-6794-3p         | 1 |
| <i>circUBE3A</i> | miR-6800-5p         | 1 |
| <i>circUBE3A</i> | miR-6802-3p         | 2 |
| <i>circUBE3A</i> | miR-6802-5p         | 1 |
| <i>circUBE3A</i> | miR-6804-5p         | 4 |
| <i>circUBE3A</i> | miR-6807-5p         | 2 |
| <i>circUBE3A</i> | miR-6808-3p         | 2 |
| <i>circUBE3A</i> | miR-6809-3p         | 4 |
| <i>circUBE3A</i> | miR-6813-3p         | 1 |
| <i>circUBE3A</i> | miR-6814-5p         | 1 |
| <i>circUBE3A</i> | miR-6815-5p/6865-5p | 1 |
| <i>circUBE3A</i> | miR-6817-3p         | 2 |
| <i>circUBE3A</i> | miR-6819-3p/6877-3p | 1 |
| <i>circUBE3A</i> | miR-6821-3p         | 1 |
| <i>circUBE3A</i> | miR-6826-5p         | 1 |
| <i>circUBE3A</i> | miR-6827-5p         | 2 |
| <i>circUBE3A</i> | miR-6828-3p         | 1 |
| <i>circUBE3A</i> | miR-6828-5p         | 5 |
| <i>circUBE3A</i> | miR-6831-3p         | 1 |
| <i>circUBE3A</i> | miR-6832-3p         | 1 |
| <i>circUBE3A</i> | miR-6834-3p         | 1 |
| <i>circUBE3A</i> | miR-6836-3p         | 4 |
| <i>circUBE3A</i> | miR-6838-3p         | 1 |
| <i>circUBE3A</i> | miR-6839-3p         | 1 |
| <i>circUBE3A</i> | miR-6840-3p         | 3 |
| <i>circUBE3A</i> | miR-6845-3p         | 1 |
| <i>circUBE3A</i> | miR-6847-3p         | 2 |
| <i>circUBE3A</i> | miR-6854-5p         | 3 |
| <i>circUBE3A</i> | miR-6858-3p         | 2 |

|                  |             |   |
|------------------|-------------|---|
| <i>circUBE3A</i> | miR-6865-3p | 2 |
| <i>circUBE3A</i> | miR-6868-3p | 1 |
| <i>circUBE3A</i> | miR-6868-5p | 1 |
| <i>circUBE3A</i> | miR-6869-5p | 2 |
| <i>circUBE3A</i> | miR-6873-3p | 1 |
| <i>circUBE3A</i> | miR-6875-3p | 3 |
| <i>circUBE3A</i> | miR-6878-5p | 5 |
| <i>circUBE3A</i> | miR-6879-3p | 2 |
| <i>circUBE3A</i> | miR-6880-5p | 5 |
| <i>circUBE3A</i> | miR-6881-5p | 5 |
| <i>circUBE3A</i> | miR-6882-3p | 1 |
| <i>circUBE3A</i> | miR-6882-5p | 5 |
| <i>circUBE3A</i> | miR-6885-3p | 5 |
| <i>circUBE3A</i> | miR-6888-3p | 5 |
| <i>circUBE3A</i> | miR-6888-5p | 3 |
| <i>circUBE3A</i> | miR-6890-3p | 1 |
| <i>circUBE3A</i> | miR-6890-5p | 4 |
| <i>circUBE3A</i> | miR-6892-3p | 1 |
| <i>circUBE3A</i> | miR-7-5p    | 1 |
| <i>circUBE3A</i> | miR-708-3p  | 1 |
| <i>circUBE3A</i> | miR-7109-3p | 2 |
| <i>circUBE3A</i> | miR-7110-3p | 2 |
| <i>circUBE3A</i> | miR-7150    | 1 |
| <i>circUBE3A</i> | miR-7158-3p | 2 |
| <i>circUBE3A</i> | miR-7158-5p | 2 |
| <i>circUBE3A</i> | miR-7159-3p | 2 |
| <i>circUBE3A</i> | miR-7160-5p | 1 |
| <i>circUBE3A</i> | miR-744-3p  | 2 |
| <i>circUBE3A</i> | miR-758-3p  | 1 |
| <i>circUBE3A</i> | miR-758-5p  | 1 |
| <i>circUBE3A</i> | miR-767-5p  | 3 |
| <i>circUBE3A</i> | miR-769-5p  | 5 |
| <i>circUBE3A</i> | miR-770-5p  | 3 |
| <i>circUBE3A</i> | miR-7843-3p | 3 |
| <i>circUBE3A</i> | miR-7844-5p | 2 |
| <i>circUBE3A</i> | miR-7847-3p | 8 |
| <i>circUBE3A</i> | miR-7849-3p | 1 |
| <i>circUBE3A</i> | miR-7850-5p | 6 |



|                  |              |   |
|------------------|--------------|---|
| <i>circUBE3A</i> | miR-7851-3p  | 1 |
| <i>circUBE3A</i> | miR-7852-3p  | 1 |
| <i>circUBE3A</i> | miR-7856-5p  | 2 |
| <i>circUBE3A</i> | miR-7973     | 1 |
| <i>circUBE3A</i> | miR-7975     | 1 |
| <i>circUBE3A</i> | miR-7978     | 7 |
| <i>circUBE3A</i> | miR-802      | 2 |
| <i>circUBE3A</i> | miR-8055     | 2 |
| <i>circUBE3A</i> | miR-8060     | 1 |
| <i>circUBE3A</i> | miR-8063     | 2 |
| <i>circUBE3A</i> | miR-8068     | 2 |
| <i>circUBE3A</i> | miR-8070     | 3 |
| <i>circUBE3A</i> | miR-8071     | 5 |
| <i>circUBE3A</i> | miR-8076     | 1 |
| <i>circUBE3A</i> | miR-8077     | 1 |
| <i>circUBE3A</i> | miR-8081     | 1 |
| <i>circUBE3A</i> | miR-8086     | 1 |
| <i>circUBE3A</i> | miR-8087     | 1 |
| <i>circUBE3A</i> | miR-8485     | 1 |
| <i>circUBE3A</i> | miR-873-5p.2 | 3 |
| <i>circUBE3A</i> | miR-875-3p   | 1 |
| <i>circUBE3A</i> | miR-876-3p   | 1 |
| <i>circUBE3A</i> | miR-877-3p   | 1 |
| <i>circUBE3A</i> | miR-887-5p   | 2 |
| <i>circUBE3A</i> | miR-888-5p   | 2 |
| <i>circUBE3A</i> | miR-889-3p   | 5 |
| <i>circUBE3A</i> | miR-890      | 1 |
| <i>circUBE3A</i> | miR-891a-3p  | 2 |
| <i>circUBE3A</i> | miR-891b     | 2 |
| <i>circUBE3A</i> | miR-892-5p   | 3 |
| <i>circUBE3A</i> | miR-892b     | 3 |
| <i>circUBE3A</i> | miR-9-5p     | 2 |
| <i>circUBE3A</i> | miR-922      | 2 |
| <i>circUBE3A</i> | miR-934      | 1 |
| <i>circUBE3A</i> | miR-937-5p   | 4 |
| <i>circUBE3A</i> | miR-941      | 1 |
| <i>circUBE3A</i> | miR-942-5p   | 4 |
| <i>circUBE3A</i> | miR-944      | 1 |

|                   |                                    |   |
|-------------------|------------------------------------|---|
| <i>circUBE3A</i>  | miR-9500                           | 1 |
| <i>circUBE3A</i>  | miR-96-3p                          | 2 |
| <i>circUBE3A</i>  | miR-96-5p/1271-5p                  | 1 |
| <i>circUBXN2A</i> | miR-10-5p                          | 2 |
| <i>circUBXN2A</i> | miR-1199-5p/6751-3p                | 4 |
| <i>circUBXN2A</i> | miR-1225-3p                        | 2 |
| <i>circUBXN2A</i> | miR-1233-3p                        | 1 |
| <i>circUBXN2A</i> | miR-1237-3p                        | 2 |
| <i>circUBXN2A</i> | miR-1238-3p                        | 1 |
| <i>circUBXN2A</i> | miR-124-5p                         | 2 |
| <i>circUBXN2A</i> | miR-1248                           | 2 |
| <i>circUBXN2A</i> | miR-1254/3116                      | 2 |
| <i>circUBXN2A</i> | miR-1257                           | 3 |
| <i>circUBXN2A</i> | miR-126-5p                         | 2 |
| <i>circUBXN2A</i> | miR-1266-3p                        | 3 |
| <i>circUBXN2A</i> | miR-1266-5p/4518                   | 2 |
| <i>circUBXN2A</i> | miR-1273a                          | 1 |
| <i>circUBXN2A</i> | miR-1273c                          | 1 |
| <i>circUBXN2A</i> | miR-1273g-3p                       | 1 |
| <i>circUBXN2A</i> | miR-1288-5p                        | 2 |
| <i>circUBXN2A</i> | miR-129-5p                         | 4 |
| <i>circUBXN2A</i> | miR-1298-5p                        | 1 |
| <i>circUBXN2A</i> | miR-1304-5p                        | 1 |
| <i>circUBXN2A</i> | miR-142-5p                         | 2 |
| <i>circUBXN2A</i> | miR-143-5p                         | 3 |
| <i>circUBXN2A</i> | miR-1468-5p                        | 2 |
| <i>circUBXN2A</i> | miR-149-3p/4728-5p/6785-5p/6883-5p | 2 |
| <i>circUBXN2A</i> | miR-154-5p                         | 1 |
| <i>circUBXN2A</i> | miR-181a-3p                        | 2 |
| <i>circUBXN2A</i> | miR-1827                           | 1 |
| <i>circUBXN2A</i> | miR-183-5p.2                       | 4 |
| <i>circUBXN2A</i> | miR-185-3p                         | 1 |
| <i>circUBXN2A</i> | miR-1910-3p/6511a-5p               | 1 |
| <i>circUBXN2A</i> | miR-193-3p                         | 2 |
| <i>circUBXN2A</i> | miR-204-3p/4646-5p                 | 1 |
| <i>circUBXN2A</i> | miR-20b-3p                         | 3 |
| <i>circUBXN2A</i> | miR-210-5p                         | 1 |
| <i>circUBXN2A</i> | miR-2114-5p                        | 2 |

|                   |                                              |   |
|-------------------|----------------------------------------------|---|
| <i>circUBXN2A</i> | miR-2115-3p                                  | 1 |
| <i>circUBXN2A</i> | miR-2115-5p                                  | 1 |
| <i>circUBXN2A</i> | miR-217                                      | 1 |
| <i>circUBXN2A</i> | miR-219-5p                                   | 1 |
| <i>circUBXN2A</i> | miR-221-5p/8073                              | 2 |
| <i>circUBXN2A</i> | miR-2467-5p                                  | 1 |
| <i>circUBXN2A</i> | miR-25-5p                                    | 1 |
| <i>circUBXN2A</i> | miR-2681-3p                                  | 1 |
| <i>circUBXN2A</i> | miR-26b-3p                                   | 2 |
| <i>circUBXN2A</i> | miR-27b-5p                                   | 1 |
| <i>circUBXN2A</i> | miR-298                                      | 1 |
| <i>circUBXN2A</i> | miR-3065-5p                                  | 1 |
| <i>circUBXN2A</i> | miR-30b-3p/1273h-5p/3689-3p/6779-5p/6780a-5p | 2 |
| <i>circUBXN2A</i> | miR-30c-3p/6788-5p                           | 2 |
| <i>circUBXN2A</i> | miR-3127-3p/6756-3p                          | 2 |
| <i>circUBXN2A</i> | miR-3128                                     | 2 |
| <i>circUBXN2A</i> | miR-3129-3p/5583-5p                          | 2 |
| <i>circUBXN2A</i> | miR-3130-3p                                  | 1 |
| <i>circUBXN2A</i> | miR-3134                                     | 2 |
| <i>circUBXN2A</i> | miR-3136-5p/4439                             | 2 |
| <i>circUBXN2A</i> | miR-3137                                     | 3 |
| <i>circUBXN2A</i> | miR-3145-5p                                  | 2 |
| <i>circUBXN2A</i> | miR-3174                                     | 1 |
| <i>circUBXN2A</i> | miR-3182                                     | 6 |
| <i>circUBXN2A</i> | miR-3185                                     | 1 |
| <i>circUBXN2A</i> | miR-3188                                     | 1 |
| <i>circUBXN2A</i> | miR-3192-5p                                  | 1 |
| <i>circUBXN2A</i> | miR-3197                                     | 1 |
| <i>circUBXN2A</i> | miR-3198/4309                                | 4 |
| <i>circUBXN2A</i> | miR-32-3p                                    | 2 |
| <i>circUBXN2A</i> | miR-329-3p/362-3p                            | 2 |
| <i>circUBXN2A</i> | miR-329-5p                                   | 4 |
| <i>circUBXN2A</i> | miR-335-5p                                   | 1 |
| <i>circUBXN2A</i> | miR-339-5p                                   | 3 |
| <i>circUBXN2A</i> | miR-345-5p                                   | 2 |
| <i>circUBXN2A</i> | miR-34b-5p/449c-5p                           | 1 |
| <i>circUBXN2A</i> | miR-361-5p                                   | 1 |
| <i>circUBXN2A</i> | miR-3612                                     | 2 |

|                   |                           |   |
|-------------------|---------------------------|---|
| <i>circUBXN2A</i> | miR-3613-3p               | 5 |
| <i>circUBXN2A</i> | miR-3664-3p               | 2 |
| <i>circUBXN2A</i> | miR-3683                  | 1 |
| <i>circUBXN2A</i> | miR-3689d/6851-5p         | 1 |
| <i>circUBXN2A</i> | miR-3692-5p               | 2 |
| <i>circUBXN2A</i> | miR-371-5p                | 1 |
| <i>circUBXN2A</i> | miR-371b-5p/373-5p/616-5p | 1 |
| <i>circUBXN2A</i> | miR-372-5p                | 1 |
| <i>circUBXN2A</i> | miR-374a-3p               | 2 |
| <i>circUBXN2A</i> | miR-377-5p/6086           | 4 |
| <i>circUBXN2A</i> | miR-380-5p/563            | 1 |
| <i>circUBXN2A</i> | miR-383-5p.2              | 1 |
| <i>circUBXN2A</i> | miR-3919                  | 1 |
| <i>circUBXN2A</i> | miR-3925-3p               | 2 |
| <i>circUBXN2A</i> | miR-3929/4419b/4478       | 2 |
| <i>circUBXN2A</i> | miR-3943                  | 1 |
| <i>circUBXN2A</i> | miR-3975                  | 1 |
| <i>circUBXN2A</i> | miR-421                   | 1 |
| <i>circUBXN2A</i> | miR-4252                  | 1 |
| <i>circUBXN2A</i> | miR-4267                  | 2 |
| <i>circUBXN2A</i> | miR-4293                  | 3 |
| <i>circUBXN2A</i> | miR-4303                  | 2 |
| <i>circUBXN2A</i> | miR-4323                  | 1 |
| <i>circUBXN2A</i> | miR-4325                  | 1 |
| <i>circUBXN2A</i> | miR-433-5p                | 2 |
| <i>circUBXN2A</i> | miR-4433a-3p              | 1 |
| <i>circUBXN2A</i> | miR-4433a-5p              | 2 |
| <i>circUBXN2A</i> | miR-4445-5p               | 1 |
| <i>circUBXN2A</i> | miR-4459                  | 1 |
| <i>circUBXN2A</i> | miR-4484                  | 1 |
| <i>circUBXN2A</i> | miR-4524a-3p              | 2 |
| <i>circUBXN2A</i> | miR-4534/8082             | 2 |
| <i>circUBXN2A</i> | miR-4537                  | 1 |
| <i>circUBXN2A</i> | miR-4540                  | 2 |
| <i>circUBXN2A</i> | miR-455-3p.2              | 3 |
| <i>circUBXN2A</i> | miR-4635                  | 2 |
| <i>circUBXN2A</i> | miR-4637                  | 2 |
| <i>circUBXN2A</i> | miR-4643                  | 2 |

|                   |                             |   |
|-------------------|-----------------------------|---|
| <i>circUBXN2A</i> | miR-4649-3p                 | 3 |
| <i>circUBXN2A</i> | miR-4652-3p                 | 3 |
| <i>circUBXN2A</i> | miR-4653-3p                 | 2 |
| <i>circUBXN2A</i> | miR-4659a-3p/4659b-3p       | 4 |
| <i>circUBXN2A</i> | miR-4663                    | 2 |
| <i>circUBXN2A</i> | miR-4684-3p                 | 1 |
| <i>circUBXN2A</i> | miR-4695-5p                 | 1 |
| <i>circUBXN2A</i> | miR-4698                    | 1 |
| <i>circUBXN2A</i> | miR-4699-3p                 | 2 |
| <i>circUBXN2A</i> | miR-4715-3p                 | 1 |
| <i>circUBXN2A</i> | miR-4719                    | 1 |
| <i>circUBXN2A</i> | miR-4720-5p/4799-3p/5588-5p | 2 |
| <i>circUBXN2A</i> | miR-4743-3p                 | 3 |
| <i>circUBXN2A</i> | miR-4749-3p                 | 1 |
| <i>circUBXN2A</i> | miR-4756-3p                 | 1 |
| <i>circUBXN2A</i> | miR-4762-3p                 | 5 |
| <i>circUBXN2A</i> | miR-4766-5p                 | 4 |
| <i>circUBXN2A</i> | miR-4768-3p                 | 1 |
| <i>circUBXN2A</i> | miR-4775                    | 3 |
| <i>circUBXN2A</i> | miR-4778-3p                 | 4 |
| <i>circUBXN2A</i> | miR-4779                    | 1 |
| <i>circUBXN2A</i> | miR-4781-5p                 | 2 |
| <i>circUBXN2A</i> | miR-4789-3p                 | 2 |
| <i>circUBXN2A</i> | miR-4790-5p                 | 1 |
| <i>circUBXN2A</i> | miR-4793-3p                 | 1 |
| <i>circUBXN2A</i> | miR-4797-5p                 | 1 |
| <i>circUBXN2A</i> | miR-4800-3p                 | 2 |
| <i>circUBXN2A</i> | miR-4802-5p                 | 2 |
| <i>circUBXN2A</i> | miR-483-3p.2                | 1 |
| <i>circUBXN2A</i> | miR-485-5p                  | 1 |
| <i>circUBXN2A</i> | miR-486-5p                  | 2 |
| <i>circUBXN2A</i> | miR-490-3p                  | 2 |
| <i>circUBXN2A</i> | miR-495-3p                  | 1 |
| <i>circUBXN2A</i> | miR-497-3p                  | 1 |
| <i>circUBXN2A</i> | miR-5000-5p                 | 2 |
| <i>circUBXN2A</i> | miR-5002-5p                 | 2 |
| <i>circUBXN2A</i> | miR-5003-3p                 | 1 |
| <i>circUBXN2A</i> | miR-504-3p                  | 2 |

|                   |                                                                 |   |
|-------------------|-----------------------------------------------------------------|---|
| <i>circUBXN2A</i> | miR-504-5p.1                                                    | 2 |
| <i>circUBXN2A</i> | miR-505-3p.2                                                    | 1 |
| <i>circUBXN2A</i> | miR-508-3p                                                      | 1 |
| <i>circUBXN2A</i> | miR-508-5p                                                      | 2 |
| <i>circUBXN2A</i> | miR-509-3-5p/509-5p/4418                                        | 1 |
| <i>circUBXN2A</i> | miR-5096                                                        | 1 |
| <i>circUBXN2A</i> | miR-5100                                                        | 1 |
| <i>circUBXN2A</i> | miR-512-5p                                                      | 1 |
| <i>circUBXN2A</i> | miR-513b-5p                                                     | 2 |
| <i>circUBXN2A</i> | miR-516a-3p/516b-3p/7162-5p                                     | 1 |
| <i>circUBXN2A</i> | miR-5188                                                        | 2 |
| <i>circUBXN2A</i> | miR-5190                                                        | 1 |
| <i>circUBXN2A</i> | miR-5197-3p                                                     | 1 |
| <i>circUBXN2A</i> | miR-545-3p                                                      | 1 |
| <i>circUBXN2A</i> | miR-548ac/548bb-3p/548d-3p/548h-3p/548z                         | 1 |
| <i>circUBXN2A</i> | miR-548an                                                       | 1 |
| <i>circUBXN2A</i> | miR-548aq-3p/548am-3p/548aj-3p/548ah3p/548ae-3p/548j-3p/548x-3p | 1 |
| <i>circUBXN2A</i> | miR-548av-3p                                                    | 2 |
| <i>circUBXN2A</i> | miR-548az-3p/548ar-3p/548a-3p/548e-3p/548f-3p                   | 1 |
| <i>circUBXN2A</i> | miR-548g-3p                                                     | 5 |
| <i>circUBXN2A</i> | miR-556-3p                                                      | 1 |
| <i>circUBXN2A</i> | miR-5582-3p                                                     | 3 |
| <i>circUBXN2A</i> | miR-5588-3p                                                     | 2 |
| <i>circUBXN2A</i> | miR-5690                                                        | 2 |
| <i>circUBXN2A</i> | miR-5694                                                        | 1 |
| <i>circUBXN2A</i> | miR-582-3p                                                      | 3 |
| <i>circUBXN2A</i> | miR-587                                                         | 3 |
| <i>circUBXN2A</i> | miR-590-3p                                                      | 5 |
| <i>circUBXN2A</i> | miR-593-5p                                                      | 2 |
| <i>circUBXN2A</i> | miR-596                                                         | 3 |
| <i>circUBXN2A</i> | miR-598-5p                                                      | 2 |
| <i>circUBXN2A</i> | miR-603                                                         | 2 |
| <i>circUBXN2A</i> | miR-607                                                         | 2 |
| <i>circUBXN2A</i> | miR-6074                                                        | 2 |
| <i>circUBXN2A</i> | miR-6083                                                        | 2 |
| <i>circUBXN2A</i> | miR-6087                                                        | 1 |
| <i>circUBXN2A</i> | miR-619-3p                                                      | 2 |
| <i>circUBXN2A</i> | miR-619-5p/6506-5p                                              | 1 |

|                   |                     |   |
|-------------------|---------------------|---|
| <i>circUBXN2A</i> | miR-628-5p          | 3 |
| <i>circUBXN2A</i> | miR-642-3p          | 2 |
| <i>circUBXN2A</i> | miR-649             | 2 |
| <i>circUBXN2A</i> | miR-6499-3p         | 2 |
| <i>circUBXN2A</i> | miR-6507-5p         | 1 |
| <i>circUBXN2A</i> | miR-6514-5p         | 2 |
| <i>circUBXN2A</i> | miR-6516-5p         | 1 |
| <i>circUBXN2A</i> | miR-655-5p          | 4 |
| <i>circUBXN2A</i> | miR-656-5p          | 1 |
| <i>circUBXN2A</i> | miR-658             | 1 |
| <i>circUBXN2A</i> | miR-661             | 2 |
| <i>circUBXN2A</i> | miR-670-3p          | 1 |
| <i>circUBXN2A</i> | miR-6715a-3p        | 1 |
| <i>circUBXN2A</i> | miR-6720-5p         | 2 |
| <i>circUBXN2A</i> | miR-6723-5p         | 2 |
| <i>circUBXN2A</i> | miR-6731-5p/8085    | 2 |
| <i>circUBXN2A</i> | miR-6732-3p         | 1 |
| <i>circUBXN2A</i> | miR-6742-3p         | 2 |
| <i>circUBXN2A</i> | miR-6746-5p         | 2 |
| <i>circUBXN2A</i> | miR-6758-3p         | 1 |
| <i>circUBXN2A</i> | miR-6758-5p/6856-5p | 2 |
| <i>circUBXN2A</i> | miR-6765-5p         | 1 |
| <i>circUBXN2A</i> | miR-6768-3p         | 1 |
| <i>circUBXN2A</i> | miR-6769a-3p        | 1 |
| <i>circUBXN2A</i> | miR-6771-3p         | 1 |
| <i>circUBXN2A</i> | miR-6799-5p         | 2 |
| <i>circUBXN2A</i> | miR-6807-5p         | 2 |
| <i>circUBXN2A</i> | miR-6830-3p         | 2 |
| <i>circUBXN2A</i> | miR-6832-3p         | 2 |
| <i>circUBXN2A</i> | miR-6849-3p         | 3 |
| <i>circUBXN2A</i> | miR-6852-5p         | 2 |
| <i>circUBXN2A</i> | miR-6868-5p         | 2 |
| <i>circUBXN2A</i> | miR-6875-3p         | 4 |
| <i>circUBXN2A</i> | miR-6878-5p         | 2 |
| <i>circUBXN2A</i> | miR-6890-3p         | 1 |
| <i>circUBXN2A</i> | miR-7106-5p         | 2 |
| <i>circUBXN2A</i> | miR-7159-5p         | 1 |
| <i>circUBXN2A</i> | miR-7160-5p         | 2 |

|                   |                          |   |
|-------------------|--------------------------|---|
| <i>circUBXN2A</i> | miR-7162-3p              | 3 |
| <i>circUBXN2A</i> | miR-758-5p               | 1 |
| <i>circUBXN2A</i> | miR-766-3p               | 2 |
| <i>circUBXN2A</i> | miR-767-5p               | 2 |
| <i>circUBXN2A</i> | miR-770-5p               | 2 |
| <i>circUBXN2A</i> | miR-7703                 | 1 |
| <i>circUBXN2A</i> | miR-7849-3p              | 2 |
| <i>circUBXN2A</i> | miR-7850-5p              | 4 |
| <i>circUBXN2A</i> | miR-7851-3p              | 2 |
| <i>circUBXN2A</i> | miR-7977                 | 2 |
| <i>circUBXN2A</i> | miR-8055                 | 2 |
| <i>circUBXN2A</i> | miR-8063                 | 1 |
| <i>circUBXN2A</i> | miR-8077                 | 2 |
| <i>circUBXN2A</i> | miR-8485                 | 2 |
| <i>circUBXN2A</i> | miR-873-3p               | 1 |
| <i>circUBXN2A</i> | miR-93-3p                | 2 |
| <i>circUBXN2A</i> | miR-939-3p               | 2 |
| <i>circUBXN2A</i> | miR-940/6808-5p/6893-5p  | 1 |
| <i>circUBXN2A</i> | miR-943                  | 2 |
| <i>circUBXN2A</i> | miR-96-3p                | 1 |
| <i>circUBXN2A</i> | miR-1183                 | 1 |
| <i>circUBXN2A</i> | miR-1200                 | 3 |
| <i>circUBXN2A</i> | miR-1208                 | 1 |
| <i>circUBXN2A</i> | miR-122-5p               | 1 |
| <i>circUBXN2A</i> | miR-1228-3p              | 1 |
| <i>circUBXN2A</i> | miR-1236-3p              | 1 |
| <i>circUBXN2A</i> | miR-1244                 | 2 |
| <i>circUBXN2A</i> | miR-1250-3p              | 1 |
| <i>circUBXN2A</i> | miR-1267                 | 2 |
| <i>circUBXN2A</i> | miR-1273f                | 1 |
| <i>circUBXN2A</i> | miR-1279                 | 1 |
| <i>circUBXN2A</i> | miR-1287-5p              | 2 |
| <i>circUBXN2A</i> | miR-1299                 | 1 |
| <i>circUBXN2A</i> | miR-130-3p/301-3p/454-3p | 3 |
| <i>circUBXN2A</i> | miR-1304-3p              | 1 |
| <i>circUBXN2A</i> | miR-1305                 | 2 |
| <i>circUBXN2A</i> | miR-1306-5p              | 1 |
| <i>circUBXN2A</i> | miR-1324                 | 1 |



|                   |                     |   |
|-------------------|---------------------|---|
| <i>circUBXN2A</i> | miR-133a-5p         | 1 |
| <i>circUBXN2A</i> | miR-135-5p          | 2 |
| <i>circUBXN2A</i> | miR-138-1-3p        | 1 |
| <i>circUBXN2A</i> | miR-138-5p          | 1 |
| <i>circUBXN2A</i> | miR-140-3p.1        | 1 |
| <i>circUBXN2A</i> | miR-140-3p.2        | 1 |
| <i>circUBXN2A</i> | miR-142-3p.1        | 3 |
| <i>circUBXN2A</i> | miR-143-3p          | 1 |
| <i>circUBXN2A</i> | miR-146a-3p         | 2 |
| <i>circUBXN2A</i> | miR-149-5p          | 3 |
| <i>circUBXN2A</i> | miR-150-5p          | 1 |
| <i>circUBXN2A</i> | miR-153-5p          | 2 |
| <i>circUBXN2A</i> | miR-1587/3620-5p    | 1 |
| <i>circUBXN2A</i> | miR-16-2-3p/195-3p  | 2 |
| <i>circUBXN2A</i> | miR-181-3p/4420     | 1 |
| <i>circUBXN2A</i> | miR-187-5p          | 1 |
| <i>circUBXN2A</i> | miR-19-3p           | 2 |
| <i>circUBXN2A</i> | miR-19-5p           | 1 |
| <i>circUBXN2A</i> | miR-1909-5p         | 1 |
| <i>circUBXN2A</i> | miR-1911-3p         | 1 |
| <i>circUBXN2A</i> | miR-1915-3p/6764-5p | 3 |
| <i>circUBXN2A</i> | miR-192-3p          | 2 |
| <i>circUBXN2A</i> | miR-192-5p/215-5p   | 1 |
| <i>circUBXN2A</i> | miR-193b-5p         | 1 |
| <i>circUBXN2A</i> | miR-194-3p          | 2 |
| <i>circUBXN2A</i> | miR-1976            | 2 |
| <i>circUBXN2A</i> | miR-199-3p          | 2 |
| <i>circUBXN2A</i> | miR-202-5p          | 1 |
| <i>circUBXN2A</i> | miR-203b-3p         | 2 |
| <i>circUBXN2A</i> | miR-205-3p          | 1 |
| <i>circUBXN2A</i> | miR-2052            | 1 |
| <i>circUBXN2A</i> | miR-2053            | 1 |
| <i>circUBXN2A</i> | miR-2054            | 1 |
| <i>circUBXN2A</i> | miR-2114-3p         | 1 |
| <i>circUBXN2A</i> | miR-2116-3p         | 1 |
| <i>circUBXN2A</i> | miR-214-3p/3619-5p  | 1 |
| <i>circUBXN2A</i> | miR-23-5p           | 2 |
| <i>circUBXN2A</i> | miR-24-3p           | 1 |

|                   |                                 |   |
|-------------------|---------------------------------|---|
| <i>circUBXN2A</i> | miR-299-5p                      | 1 |
| <i>circUBXN2A</i> | miR-302-3p/372-3p/373-3p/520-3p | 1 |
| <i>circUBXN2A</i> | miR-302b-5p/302d-5p             | 1 |
| <i>circUBXN2A</i> | miR-31-3p                       | 2 |
| <i>circUBXN2A</i> | miR-3120-3p                     | 2 |
| <i>circUBXN2A</i> | miR-3135b                       | 2 |
| <i>circUBXN2A</i> | miR-3140-5p                     | 1 |
| <i>circUBXN2A</i> | miR-3158-3p                     | 1 |
| <i>circUBXN2A</i> | miR-3166                        | 1 |
| <i>circUBXN2A</i> | miR-3176/3922-3p                | 1 |
| <i>circUBXN2A</i> | miR-3183/4723-3p/6769b-3p       | 1 |
| <i>circUBXN2A</i> | miR-3187-3p                     | 1 |
| <i>circUBXN2A</i> | miR-3190-3p                     | 1 |
| <i>circUBXN2A</i> | miR-3190-5p                     | 1 |
| <i>circUBXN2A</i> | miR-335-3p                      | 2 |
| <i>circUBXN2A</i> | miR-33a-3p                      | 1 |
| <i>circUBXN2A</i> | miR-345-3p                      | 1 |
| <i>circUBXN2A</i> | miR-3615                        | 1 |
| <i>circUBXN2A</i> | miR-362-5p/500b-5p              | 2 |
| <i>circUBXN2A</i> | miR-3622a-3p/3622b-3p           | 2 |
| <i>circUBXN2A</i> | miR-3650                        | 1 |
| <i>circUBXN2A</i> | miR-3652/4430                   | 5 |
| <i>circUBXN2A</i> | miR-3653-5p                     | 2 |
| <i>circUBXN2A</i> | miR-3655                        | 1 |
| <i>circUBXN2A</i> | miR-367-5p                      | 2 |
| <i>circUBXN2A</i> | miR-3670                        | 1 |
| <i>circUBXN2A</i> | miR-3679-3p                     | 2 |
| <i>circUBXN2A</i> | miR-3680-5p                     | 1 |
| <i>circUBXN2A</i> | miR-3681-5p                     | 1 |
| <i>circUBXN2A</i> | miR-3685                        | 1 |
| <i>circUBXN2A</i> | miR-3686                        | 2 |
| <i>circUBXN2A</i> | miR-3688-5p                     | 2 |
| <i>circUBXN2A</i> | miR-3691-3p                     | 2 |
| <i>circUBXN2A</i> | miR-378-3p                      | 1 |
| <i>circUBXN2A</i> | miR-378a-5p                     | 3 |
| <i>circUBXN2A</i> | miR-378g                        | 4 |
| <i>circUBXN2A</i> | miR-382-5p                      | 1 |
| <i>circUBXN2A</i> | miR-384                         | 1 |

|                   |                   |   |
|-------------------|-------------------|---|
| <i>circUBXN2A</i> | miR-3908          | 1 |
| <i>circUBXN2A</i> | miR-3911          | 1 |
| <i>circUBXN2A</i> | miR-3926          | 1 |
| <i>circUBXN2A</i> | miR-3934-3p       | 1 |
| <i>circUBXN2A</i> | miR-3938          | 3 |
| <i>circUBXN2A</i> | miR-3940-5p/4507  | 2 |
| <i>circUBXN2A</i> | miR-3942-5p       | 1 |
| <i>circUBXN2A</i> | miR-3944-5p       | 1 |
| <i>circUBXN2A</i> | miR-3945          | 1 |
| <i>circUBXN2A</i> | miR-3973          | 1 |
| <i>circUBXN2A</i> | miR-411-5p.1      | 1 |
| <i>circUBXN2A</i> | miR-4253/6862-5p  | 1 |
| <i>circUBXN2A</i> | miR-4264          | 1 |
| <i>circUBXN2A</i> | miR-4269/6715b-5p | 1 |
| <i>circUBXN2A</i> | miR-4276          | 2 |
| <i>circUBXN2A</i> | miR-4282          | 1 |
| <i>circUBXN2A</i> | miR-4284          | 1 |
| <i>circUBXN2A</i> | miR-4312          | 1 |
| <i>circUBXN2A</i> | miR-4324          | 4 |
| <i>circUBXN2A</i> | miR-4421/5699-3p  | 1 |
| <i>circUBXN2A</i> | miR-4423-5p       | 2 |
| <i>circUBXN2A</i> | miR-4435          | 1 |
| <i>circUBXN2A</i> | miR-4438          | 2 |
| <i>circUBXN2A</i> | miR-4446-3p       | 1 |
| <i>circUBXN2A</i> | miR-4473          | 1 |
| <i>circUBXN2A</i> | miR-4474-3p       | 1 |
| <i>circUBXN2A</i> | miR-4474-5p       | 2 |
| <i>circUBXN2A</i> | miR-4486          | 4 |
| <i>circUBXN2A</i> | miR-4490          | 1 |
| <i>circUBXN2A</i> | miR-4505/5787     | 5 |
| <i>circUBXN2A</i> | miR-4506          | 1 |
| <i>circUBXN2A</i> | miR-4514/4692     | 1 |
| <i>circUBXN2A</i> | miR-4520-3p       | 1 |
| <i>circUBXN2A</i> | miR-4527/6503-5p  | 1 |
| <i>circUBXN2A</i> | miR-4638-3p       | 1 |
| <i>circUBXN2A</i> | miR-4645-5p/4673  | 1 |
| <i>circUBXN2A</i> | miR-4656          | 3 |
| <i>circUBXN2A</i> | miR-4671-3p       | 1 |

|                   |                             |   |
|-------------------|-----------------------------|---|
| <i>circUBXN2A</i> | miR-4674                    | 1 |
| <i>circUBXN2A</i> | miR-4675/4741               | 3 |
| <i>circUBXN2A</i> | miR-4677-3p                 | 2 |
| <i>circUBXN2A</i> | miR-4679                    | 2 |
| <i>circUBXN2A</i> | miR-4680-5p                 | 2 |
| <i>circUBXN2A</i> | miR-4682                    | 1 |
| <i>circUBXN2A</i> | miR-4707-5p                 | 1 |
| <i>circUBXN2A</i> | miR-4708-5p                 | 1 |
| <i>circUBXN2A</i> | miR-4713-5p                 | 1 |
| <i>circUBXN2A</i> | miR-4722-3p/6727-3p         | 2 |
| <i>circUBXN2A</i> | miR-4725-5p                 | 1 |
| <i>circUBXN2A</i> | miR-4726-3p                 | 3 |
| <i>circUBXN2A</i> | miR-4731-5p                 | 1 |
| <i>circUBXN2A</i> | miR-4732-5p                 | 1 |
| <i>circUBXN2A</i> | miR-4742-3p                 | 1 |
| <i>circUBXN2A</i> | miR-4742-5p                 | 1 |
| <i>circUBXN2A</i> | miR-4755-5p/5006-3p         | 3 |
| <i>circUBXN2A</i> | miR-4763-5p                 | 1 |
| <i>circUBXN2A</i> | miR-4769-3p/6817-5p         | 2 |
| <i>circUBXN2A</i> | miR-4771                    | 1 |
| <i>circUBXN2A</i> | miR-4774-5p                 | 1 |
| <i>circUBXN2A</i> | miR-4778-5p                 | 2 |
| <i>circUBXN2A</i> | miR-4782-5p/5706            | 1 |
| <i>circUBXN2A</i> | miR-4797-3p                 | 1 |
| <i>circUBXN2A</i> | miR-4798-3p                 | 1 |
| <i>circUBXN2A</i> | miR-4803                    | 2 |
| <i>circUBXN2A</i> | miR-483-3p.1                | 2 |
| <i>circUBXN2A</i> | miR-484/3155                | 3 |
| <i>circUBXN2A</i> | miR-488-5p                  | 1 |
| <i>circUBXN2A</i> | miR-493-3p                  | 1 |
| <i>circUBXN2A</i> | miR-494-3p                  | 1 |
| <i>circUBXN2A</i> | miR-495-5p                  | 1 |
| <i>circUBXN2A</i> | miR-500a-5p                 | 3 |
| <i>circUBXN2A</i> | miR-501-5p                  | 2 |
| <i>circUBXN2A</i> | miR-5088-5p                 | 1 |
| <i>circUBXN2A</i> | miR-5095/7151-3p            | 1 |
| <i>circUBXN2A</i> | miR-511-5p                  | 1 |
| <i>circUBXN2A</i> | miR-513a-3p/513c-3p/3606-3p | 2 |

|                   |                                       |   |
|-------------------|---------------------------------------|---|
| <i>circUBXN2A</i> | miR-516b-5p                           | 1 |
| <i>circUBXN2A</i> | miR-517-3p                            | 1 |
| <i>circUBXN2A</i> | miR-5189-3p                           | 1 |
| <i>circUBXN2A</i> | miR-519-3p                            | 1 |
| <i>circUBXN2A</i> | miR-5195-5p                           | 1 |
| <i>circUBXN2A</i> | miR-520g-3p                           | 1 |
| <i>circUBXN2A</i> | miR-532-3p                            | 1 |
| <i>circUBXN2A</i> | miR-544b                              | 4 |
| <i>circUBXN2A</i> | miR-548ai/548ag/548ba/570-5p          | 1 |
| <i>circUBXN2A</i> | miR-548at-5p                          | 2 |
| <i>circUBXN2A</i> | miR-548c-3p                           | 2 |
| <i>circUBXN2A</i> | miR-548s                              | 1 |
| <i>circUBXN2A</i> | miR-552-5p                            | 1 |
| <i>circUBXN2A</i> | miR-554                               | 1 |
| <i>circUBXN2A</i> | miR-5571-3p                           | 1 |
| <i>circUBXN2A</i> | miR-5571-5p                           | 1 |
| <i>circUBXN2A</i> | miR-5580-3p                           | 1 |
| <i>circUBXN2A</i> | miR-5580-5p                           | 2 |
| <i>circUBXN2A</i> | miR-5587-3p                           | 1 |
| <i>circUBXN2A</i> | miR-5589-5p                           | 1 |
| <i>circUBXN2A</i> | miR-561-3p                            | 2 |
| <i>circUBXN2A</i> | miR-562                               | 1 |
| <i>circUBXN2A</i> | miR-568                               | 1 |
| <i>circUBXN2A</i> | miR-5693                              | 2 |
| <i>circUBXN2A</i> | miR-5696                              | 2 |
| <i>circUBXN2A</i> | miR-578                               | 1 |
| <i>circUBXN2A</i> | miR-579-3p                            | 2 |
| <i>circUBXN2A</i> | miR-584-3p                            | 1 |
| <i>circUBXN2A</i> | miR-588                               | 1 |
| <i>circUBXN2A</i> | miR-6073                              | 3 |
| <i>circUBXN2A</i> | miR-612/1285-3p/3187-5p/5189-5p/68604 | 4 |
| <i>circUBXN2A</i> | miR-6126                              | 1 |
| <i>circUBXN2A</i> | miR-6128                              | 1 |
| <i>circUBXN2A</i> | miR-6131                              | 1 |
| <i>circUBXN2A</i> | miR-622                               | 1 |
| <i>circUBXN2A</i> | miR-629-5p                            | 1 |
| <i>circUBXN2A</i> | miR-642b-5p                           | 2 |
| <i>circUBXN2A</i> | miR-644a                              | 1 |

|                   |                     |   |
|-------------------|---------------------|---|
| <i>circUBXN2A</i> | miR-647             | 1 |
| <i>circUBXN2A</i> | miR-6501-5p         | 2 |
| <i>circUBXN2A</i> | miR-6511-3p         | 1 |
| <i>circUBXN2A</i> | miR-6513-3p         | 1 |
| <i>circUBXN2A</i> | miR-6515-3p         | 1 |
| <i>circUBXN2A</i> | miR-653-3p          | 1 |
| <i>circUBXN2A</i> | miR-656-3p          | 1 |
| <i>circUBXN2A</i> | miR-664a-5p/4794    | 3 |
| <i>circUBXN2A</i> | miR-670-5p          | 2 |
| <i>circUBXN2A</i> | miR-6739-3p         | 1 |
| <i>circUBXN2A</i> | miR-6740-3p         | 1 |
| <i>circUBXN2A</i> | miR-6747-3p         | 2 |
| <i>circUBXN2A</i> | miR-6748-3p         | 1 |
| <i>circUBXN2A</i> | miR-6753-3p/7107-3p | 1 |
| <i>circUBXN2A</i> | miR-676-3p          | 1 |
| <i>circUBXN2A</i> | miR-676-5p          | 1 |
| <i>circUBXN2A</i> | miR-6760-3p         | 1 |
| <i>circUBXN2A</i> | miR-6763-3p         | 1 |
| <i>circUBXN2A</i> | miR-6765-3p         | 2 |
| <i>circUBXN2A</i> | miR-6768-5p         | 1 |
| <i>circUBXN2A</i> | miR-6780a-3p        | 1 |
| <i>circUBXN2A</i> | miR-6784-3p/6862-3p | 1 |
| <i>circUBXN2A</i> | miR-6788-3p         | 1 |
| <i>circUBXN2A</i> | miR-6800-3p         | 1 |
| <i>circUBXN2A</i> | miR-6802-3p         | 1 |
| <i>circUBXN2A</i> | miR-6808-3p         | 1 |
| <i>circUBXN2A</i> | miR-6814-5p         | 1 |
| <i>circUBXN2A</i> | miR-6815-3p         | 1 |
| <i>circUBXN2A</i> | miR-6819-3p/6877-3p | 1 |
| <i>circUBXN2A</i> | miR-6829-5p         | 3 |
| <i>circUBXN2A</i> | miR-6832-5p         | 1 |
| <i>circUBXN2A</i> | miR-6839-3p         | 2 |
| <i>circUBXN2A</i> | miR-6840-3p         | 3 |
| <i>circUBXN2A</i> | miR-6842-3p         | 1 |
| <i>circUBXN2A</i> | miR-6844            | 3 |
| <i>circUBXN2A</i> | miR-6854-5p         | 1 |
| <i>circUBXN2A</i> | miR-6856-3p         | 1 |
| <i>circUBXN2A</i> | miR-6864-5p         | 1 |

|                   |                           |   |
|-------------------|---------------------------|---|
| <i>circUBXN2A</i> | miR-6867-3p               | 1 |
| <i>circUBXN2A</i> | miR-6869-5p               | 2 |
| <i>circUBXN2A</i> | miR-6878-3p               | 1 |
| <i>circUBXN2A</i> | miR-6881-3p               | 1 |
| <i>circUBXN2A</i> | miR-6885-3p               | 1 |
| <i>circUBXN2A</i> | miR-7108-5p               | 1 |
| <i>circUBXN2A</i> | miR-7111-3p               | 1 |
| <i>circUBXN2A</i> | miR-7158-3p               | 2 |
| <i>circUBXN2A</i> | miR-7161-3p               | 1 |
| <i>circUBXN2A</i> | miR-744-3p                | 2 |
| <i>circUBXN2A</i> | miR-762/4492/4498/5001-5p | 3 |
| <i>circUBXN2A</i> | miR-7856-5p               | 1 |
| <i>circUBXN2A</i> | miR-7973                  | 1 |
| <i>circUBXN2A</i> | miR-7975                  | 1 |
| <i>circUBXN2A</i> | miR-8057                  | 1 |
| <i>circUBXN2A</i> | miR-889-5p                | 2 |
| <i>circUBXN2A</i> | miR-891a-3p               | 2 |
| <i>circUBXN2A</i> | miR-922                   | 1 |
| <i>circUBXN2A</i> | miR-936                   | 2 |
| <i>circUBXN2A</i> | miR-944                   | 1 |
| <i>circUBXN2A</i> | miR-103a-2-5p             | 1 |
| <i>circUBXN2A</i> | miR-103b                  | 1 |
| <i>circUBXN2A</i> | miR-1179                  | 1 |
| <i>circUBXN2A</i> | miR-1180-3p               | 1 |
| <i>circUBXN2A</i> | miR-1185-5p               | 1 |
| <i>circUBXN2A</i> | miR-1193                  | 1 |
| <i>circUBXN2A</i> | miR-1197                  | 1 |
| <i>circUBXN2A</i> | miR-1202/3972             | 1 |
| <i>circUBXN2A</i> | miR-1224-5p               | 1 |
| <i>circUBXN2A</i> | miR-1228-5p               | 1 |
| <i>circUBXN2A</i> | miR-1233-5p/6778-5p       | 2 |
| <i>circUBXN2A</i> | miR-1238-5p/4758-5p       | 1 |
| <i>circUBXN2A</i> | miR-1247-3p               | 1 |
| <i>circUBXN2A</i> | miR-125-5p                | 1 |
| <i>circUBXN2A</i> | miR-125a-3p               | 2 |
| <i>circUBXN2A</i> | miR-1264                  | 1 |
| <i>circUBXN2A</i> | miR-1272                  | 1 |
| <i>circUBXN2A</i> | miR-1275/4665-5p          | 1 |

|                   |                      |   |
|-------------------|----------------------|---|
| <i>circUBXN2A</i> | miR-1276             | 1 |
| <i>circUBXN2A</i> | miR-1287-3p          | 1 |
| <i>circUBXN2A</i> | miR-1289             | 1 |
| <i>circUBXN2A</i> | miR-129-3p           | 1 |
| <i>circUBXN2A</i> | miR-1290             | 1 |
| <i>circUBXN2A</i> | miR-1292-5p          | 1 |
| <i>circUBXN2A</i> | miR-1296-3p          | 1 |
| <i>circUBXN2A</i> | miR-1322             | 1 |
| <i>circUBXN2A</i> | miR-141-5p           | 1 |
| <i>circUBXN2A</i> | miR-142-3p.2         | 1 |
| <i>circUBXN2A</i> | miR-145-5p           | 1 |
| <i>circUBXN2A</i> | miR-146b-3p          | 1 |
| <i>circUBXN2A</i> | miR-148-3p/152-3p    | 1 |
| <i>circUBXN2A</i> | miR-148a-5p          | 1 |
| <i>circUBXN2A</i> | miR-148b-5p/6874-3p  | 1 |
| <i>circUBXN2A</i> | miR-1537-5p          | 1 |
| <i>circUBXN2A</i> | miR-15b-3p           | 1 |
| <i>circUBXN2A</i> | miR-18-5p            | 1 |
| <i>circUBXN2A</i> | miR-1825             | 1 |
| <i>circUBXN2A</i> | miR-183-5p.1         | 1 |
| <i>circUBXN2A</i> | miR-186-3p           | 1 |
| <i>circUBXN2A</i> | miR-190-5p           | 1 |
| <i>circUBXN2A</i> | miR-191-5p           | 1 |
| <i>circUBXN2A</i> | miR-1914-5p          | 2 |
| <i>circUBXN2A</i> | miR-196a-3p          | 1 |
| <i>circUBXN2A</i> | miR-196b-3p          | 1 |
| <i>circUBXN2A</i> | miR-199-5p           | 1 |
| <i>circUBXN2A</i> | miR-2117             | 1 |
| <i>circUBXN2A</i> | miR-212-5p           | 1 |
| <i>circUBXN2A</i> | miR-216b-3p          | 1 |
| <i>circUBXN2A</i> | miR-218-5p           | 2 |
| <i>circUBXN2A</i> | miR-222-5p           | 1 |
| <i>circUBXN2A</i> | miR-2276-3p          | 1 |
| <i>circUBXN2A</i> | miR-2277-3p          | 1 |
| <i>circUBXN2A</i> | miR-301a-5p/301b-5p  | 2 |
| <i>circUBXN2A</i> | miR-302c-3p.2/520-3p | 1 |
| <i>circUBXN2A</i> | miR-3064-3p          | 1 |
| <i>circUBXN2A</i> | miR-3064-5p          | 1 |



|                   |                          |   |
|-------------------|--------------------------|---|
| <i>circUBXN2A</i> | miR-3122/3913-5p         | 1 |
| <i>circUBXN2A</i> | miR-3148                 | 1 |
| <i>circUBXN2A</i> | miR-3151-3p              | 1 |
| <i>circUBXN2A</i> | miR-3151-5p              | 1 |
| <i>circUBXN2A</i> | miR-3153/6733-5p/6739-5p | 1 |
| <i>circUBXN2A</i> | miR-3159                 | 2 |
| <i>circUBXN2A</i> | miR-3160-3p              | 1 |
| <i>circUBXN2A</i> | miR-3168                 | 1 |
| <i>circUBXN2A</i> | miR-3169                 | 1 |
| <i>circUBXN2A</i> | miR-3173-5p              | 1 |
| <i>circUBXN2A</i> | miR-3178                 | 1 |
| <i>circUBXN2A</i> | miR-3180-5p              | 1 |
| <i>circUBXN2A</i> | miR-3184-3p              | 1 |
| <i>circUBXN2A</i> | miR-3189-3p              | 1 |
| <i>circUBXN2A</i> | miR-3191-5p              | 3 |
| <i>circUBXN2A</i> | miR-3194-3p              | 1 |
| <i>circUBXN2A</i> | miR-320e                 | 1 |
| <i>circUBXN2A</i> | miR-326                  | 1 |
| <i>circUBXN2A</i> | miR-328-5p/6885-5p       | 1 |
| <i>circUBXN2A</i> | miR-3605-5p              | 1 |
| <i>circUBXN2A</i> | miR-3607-3p              | 1 |
| <i>circUBXN2A</i> | miR-3611                 | 1 |
| <i>circUBXN2A</i> | miR-3651                 | 1 |
| <i>circUBXN2A</i> | miR-3659                 | 1 |
| <i>circUBXN2A</i> | miR-3675-3p              | 1 |
| <i>circUBXN2A</i> | miR-3677-5p              | 1 |
| <i>circUBXN2A</i> | miR-3692-3p              | 1 |
| <i>circUBXN2A</i> | miR-376c-3p              | 1 |
| <i>circUBXN2A</i> | miR-382-3p               | 1 |
| <i>circUBXN2A</i> | miR-383-5p.1             | 1 |
| <i>circUBXN2A</i> | miR-3907                 | 1 |
| <i>circUBXN2A</i> | miR-3915                 | 1 |
| <i>circUBXN2A</i> | miR-3921/4653-5p         | 2 |
| <i>circUBXN2A</i> | miR-3928-5p/6806-3p      | 1 |
| <i>circUBXN2A</i> | miR-3934-5p              | 2 |
| <i>circUBXN2A</i> | miR-3977                 | 1 |
| <i>circUBXN2A</i> | miR-424-3p               | 1 |
| <i>circUBXN2A</i> | miR-4270/4441/6754-5p    | 1 |

|                   |                           |   |
|-------------------|---------------------------|---|
| <i>circUBXN2A</i> | miR-4271/4725-3p/6780b-5p | 1 |
| <i>circUBXN2A</i> | miR-4283                  | 1 |
| <i>circUBXN2A</i> | miR-4294                  | 1 |
| <i>circUBXN2A</i> | miR-4302                  | 1 |
| <i>circUBXN2A</i> | miR-4310/7157-5p          | 1 |
| <i>circUBXN2A</i> | miR-4311                  | 1 |
| <i>circUBXN2A</i> | miR-4314                  | 1 |
| <i>circUBXN2A</i> | miR-4320                  | 1 |
| <i>circUBXN2A</i> | miR-4328                  | 1 |
| <i>circUBXN2A</i> | miR-4426/4647/4662b       | 1 |
| <i>circUBXN2A</i> | miR-4427                  | 1 |
| <i>circUBXN2A</i> | miR-4436b-5p              | 1 |
| <i>circUBXN2A</i> | miR-4447/4472             | 1 |
| <i>circUBXN2A</i> | miR-4460                  | 1 |
| <i>circUBXN2A</i> | miR-4461                  | 1 |
| <i>circUBXN2A</i> | miR-4471/8059             | 1 |
| <i>circUBXN2A</i> | miR-4476/6876-5p          | 1 |
| <i>circUBXN2A</i> | miR-4487                  | 1 |
| <i>circUBXN2A</i> | miR-4489                  | 1 |
| <i>circUBXN2A</i> | miR-4497                  | 1 |
| <i>circUBXN2A</i> | miR-4508                  | 1 |
| <i>circUBXN2A</i> | miR-450a-1-3p             | 1 |
| <i>circUBXN2A</i> | miR-450b-3p/769-3p        | 1 |
| <i>circUBXN2A</i> | miR-4517                  | 1 |
| <i>circUBXN2A</i> | miR-452-3p                | 1 |
| <i>circUBXN2A</i> | miR-4521                  | 1 |
| <i>circUBXN2A</i> | miR-4648                  | 2 |
| <i>circUBXN2A</i> | miR-4654/4769-5p          | 2 |
| <i>circUBXN2A</i> | miR-4658/6790-5p          | 1 |
| <i>circUBXN2A</i> | miR-4664-3p               | 1 |
| <i>circUBXN2A</i> | miR-4668-3p               | 1 |
| <i>circUBXN2A</i> | miR-4668-5p               | 1 |
| <i>circUBXN2A</i> | miR-4680-3p               | 1 |
| <i>circUBXN2A</i> | miR-4684-5p               | 1 |
| <i>circUBXN2A</i> | miR-4685-5p/6837-5p       | 1 |
| <i>circUBXN2A</i> | miR-4686                  | 1 |
| <i>circUBXN2A</i> | miR-4687-3p               | 1 |
| <i>circUBXN2A</i> | miR-4687-5p               | 1 |

|                   |                                  |   |
|-------------------|----------------------------------|---|
| <i>circUBXN2A</i> | miR-4689/6858-5p                 | 1 |
| <i>circUBXN2A</i> | miR-4690-3p/5685                 | 1 |
| <i>circUBXN2A</i> | miR-4700-3p                      | 1 |
| <i>circUBXN2A</i> | miR-4705                         | 1 |
| <i>circUBXN2A</i> | miR-4711-3p                      | 1 |
| <i>circUBXN2A</i> | miR-4713-3p                      | 1 |
| <i>circUBXN2A</i> | miR-4714-3p                      | 1 |
| <i>circUBXN2A</i> | miR-4717-3p                      | 1 |
| <i>circUBXN2A</i> | miR-4718                         | 1 |
| <i>circUBXN2A</i> | miR-4723-5p/5698/6870-5p/7111-5p | 1 |
| <i>circUBXN2A</i> | miR-4727-3p                      | 1 |
| <i>circUBXN2A</i> | miR-4732-3p                      | 1 |
| <i>circUBXN2A</i> | miR-4747-5p/5196-5p              | 1 |
| <i>circUBXN2A</i> | miR-4751                         | 2 |
| <i>circUBXN2A</i> | miR-4755-3p                      | 1 |
| <i>circUBXN2A</i> | miR-4759                         | 1 |
| <i>circUBXN2A</i> | miR-4766-3p                      | 1 |
| <i>circUBXN2A</i> | miR-4768-5p/6833-3p              | 2 |
| <i>circUBXN2A</i> | miR-4772-3p                      | 1 |
| <i>circUBXN2A</i> | miR-4772-5p                      | 1 |
| <i>circUBXN2A</i> | miR-4776-3p                      | 1 |
| <i>circUBXN2A</i> | miR-4786-5p                      | 1 |
| <i>circUBXN2A</i> | miR-4796-3p                      | 1 |
| <i>circUBXN2A</i> | miR-4796-5p                      | 1 |
| <i>circUBXN2A</i> | miR-4799-5p                      | 1 |
| <i>circUBXN2A</i> | miR-488-3p                       | 2 |
| <i>circUBXN2A</i> | miR-491-5p                       | 1 |
| <i>circUBXN2A</i> | miR-4999-5p                      | 1 |
| <i>circUBXN2A</i> | miR-5004-5p                      | 2 |
| <i>circUBXN2A</i> | miR-5006-5p                      | 1 |
| <i>circUBXN2A</i> | miR-5008-3p/6737-3p/7157-3p      | 1 |
| <i>circUBXN2A</i> | miR-5010-5p                      | 1 |
| <i>circUBXN2A</i> | miR-502-5p                       | 1 |
| <i>circUBXN2A</i> | miR-505-5p                       | 1 |
| <i>circUBXN2A</i> | miR-5089-5p                      | 1 |
| <i>circUBXN2A</i> | miR-5090/6775-5p                 | 1 |
| <i>circUBXN2A</i> | miR-5094                         | 2 |
| <i>circUBXN2A</i> | miR-512-3p                       | 1 |

|                   |                 |   |
|-------------------|-----------------|---|
| <i>circUBXN2A</i> | miR-5187-3p     | 1 |
| <i>circUBXN2A</i> | miR-518a-5p/527 | 1 |
| <i>circUBXN2A</i> | miR-518c-5p     | 1 |
| <i>circUBXN2A</i> | miR-520f-5p     | 1 |
| <i>circUBXN2A</i> | miR-545-5p      | 1 |
| <i>circUBXN2A</i> | miR-548ad-3p    | 1 |
| <i>circUBXN2A</i> | miR-548aw       | 1 |
| <i>circUBXN2A</i> | miR-550b-3p     | 1 |
| <i>circUBXN2A</i> | miR-551b-5p     | 1 |
| <i>circUBXN2A</i> | miR-553         | 1 |
| <i>circUBXN2A</i> | miR-558         | 1 |
| <i>circUBXN2A</i> | miR-5583-3p     | 1 |
| <i>circUBXN2A</i> | miR-5584-3p     | 1 |
| <i>circUBXN2A</i> | miR-5584-5p     | 1 |
| <i>circUBXN2A</i> | miR-5585-3p     | 1 |
| <i>circUBXN2A</i> | miR-5586-5p     | 1 |
| <i>circUBXN2A</i> | miR-5589-3p     | 1 |
| <i>circUBXN2A</i> | miR-5680        | 1 |
| <i>circUBXN2A</i> | miR-5681b       | 1 |
| <i>circUBXN2A</i> | miR-5684        | 1 |
| <i>circUBXN2A</i> | miR-5691        | 1 |
| <i>circUBXN2A</i> | miR-5697        | 1 |
| <i>circUBXN2A</i> | miR-570-3p      | 1 |
| <i>circUBXN2A</i> | miR-573/3616-5p | 1 |
| <i>circUBXN2A</i> | miR-574-5p      | 1 |
| <i>circUBXN2A</i> | miR-580-5p      | 1 |
| <i>circUBXN2A</i> | miR-583         | 1 |
| <i>circUBXN2A</i> | miR-584-5p      | 1 |
| <i>circUBXN2A</i> | miR-593-3p      | 1 |
| <i>circUBXN2A</i> | miR-6071        | 1 |
| <i>circUBXN2A</i> | miR-6077        | 1 |
| <i>circUBXN2A</i> | miR-6124        | 1 |
| <i>circUBXN2A</i> | miR-6134        | 1 |
| <i>circUBXN2A</i> | miR-617         | 1 |
| <i>circUBXN2A</i> | miR-625-5p      | 1 |
| <i>circUBXN2A</i> | miR-634         | 1 |
| <i>circUBXN2A</i> | miR-635/6774-5p | 1 |
| <i>circUBXN2A</i> | miR-638         | 1 |

|                   |                       |   |
|-------------------|-----------------------|---|
| <i>circUBXN2A</i> | miR-648               | 2 |
| <i>circUBXN2A</i> | miR-6505-3p           | 1 |
| <i>circUBXN2A</i> | miR-6505-5p           | 1 |
| <i>circUBXN2A</i> | miR-6509-3p           | 1 |
| <i>circUBXN2A</i> | miR-6513-5p           | 1 |
| <i>circUBXN2A</i> | miR-654-5p            | 2 |
| <i>circUBXN2A</i> | miR-671-5p            | 1 |
| <i>circUBXN2A</i> | miR-6722-5p           | 1 |
| <i>circUBXN2A</i> | miR-6728-3p           | 1 |
| <i>circUBXN2A</i> | miR-6728-5p           | 1 |
| <i>circUBXN2A</i> | miR-6733-3p           | 1 |
| <i>circUBXN2A</i> | miR-6742-5p           | 1 |
| <i>circUBXN2A</i> | miR-6750-5p/6822-5p   | 1 |
| <i>circUBXN2A</i> | miR-6751-5p/6803-5p   | 1 |
| <i>circUBXN2A</i> | miR-6752-3p           | 1 |
| <i>circUBXN2A</i> | miR-6764-3p/6824-3p   | 1 |
| <i>circUBXN2A</i> | miR-6769a-5p/6769b-5p | 2 |
| <i>circUBXN2A</i> | miR-6779-3p           | 1 |
| <i>circUBXN2A</i> | miR-6784-5p           | 1 |
| <i>circUBXN2A</i> | miR-6795-5p/6887-5p   | 1 |
| <i>circUBXN2A</i> | miR-6801-5p           | 1 |
| <i>circUBXN2A</i> | miR-6804-3p           | 1 |
| <i>circUBXN2A</i> | miR-6809-3p           | 2 |
| <i>circUBXN2A</i> | miR-6814-3p/6872-5p   | 1 |
| <i>circUBXN2A</i> | miR-6815-5p/6865-5p   | 2 |
| <i>circUBXN2A</i> | miR-6818-3p           | 1 |
| <i>circUBXN2A</i> | miR-6827-5p           | 1 |
| <i>circUBXN2A</i> | miR-6828-3p           | 1 |
| <i>circUBXN2A</i> | miR-6828-5p           | 1 |
| <i>circUBXN2A</i> | miR-6846-3p           | 1 |
| <i>circUBXN2A</i> | miR-6859-3p           | 1 |
| <i>circUBXN2A</i> | miR-6870-3p           | 1 |
| <i>circUBXN2A</i> | miR-6883-3p           | 1 |
| <i>circUBXN2A</i> | miR-6884-3p           | 1 |
| <i>circUBXN2A</i> | miR-6889-3p           | 1 |
| <i>circUBXN2A</i> | miR-6894-5p           | 2 |
| <i>circUBXN2A</i> | miR-6895-3p           | 1 |
| <i>circUBXN2A</i> | miR-7-5p              | 1 |

|                   |                       |   |
|-------------------|-----------------------|---|
| <i>circUBXN2A</i> | miR-7109-5p           | 1 |
| <i>circUBXN2A</i> | miR-7113-5p           | 1 |
| <i>circUBXN2A</i> | miR-7154-3p           | 2 |
| <i>circUBXN2A</i> | miR-764               | 2 |
| <i>circUBXN2A</i> | miR-765               | 2 |
| <i>circUBXN2A</i> | miR-766-5p            | 2 |
| <i>circUBXN2A</i> | miR-769-5p            | 1 |
| <i>circUBXN2A</i> | miR-7854-3p           | 1 |
| <i>circUBXN2A</i> | miR-7855-5p           | 1 |
| <i>circUBXN2A</i> | miR-7974              | 1 |
| <i>circUBXN2A</i> | miR-7976              | 1 |
| <i>circUBXN2A</i> | miR-802               | 1 |
| <i>circUBXN2A</i> | miR-8074              | 2 |
| <i>circUBXN2A</i> | miR-8075              | 1 |
| <i>circUBXN2A</i> | miR-8076              | 2 |
| <i>circUBXN2A</i> | miR-8083              | 1 |
| <i>circUBXN2A</i> | miR-873-5p.1          | 1 |
| <i>circUBXN2A</i> | miR-876-5p            | 1 |
| <i>circUBXN2A</i> | miR-887-5p            | 1 |
| <i>circUBXN2A</i> | miR-890               | 1 |
| <i>circUBXN2A</i> | miR-9-5p              | 1 |
| <i>circUBXN2A</i> | miR-924               | 1 |
| <i>circUBXN2A</i> | miR-92a-2-5p          | 2 |
| <i>circUBXN2A</i> | miR-942-5p            | 2 |
| <i>circUBXN2A</i> | miR-9500              | 1 |
| <i>circUNC13C</i> | let-7a-2-3p/let-7g-3p | 1 |
| <i>circUNC13C</i> | let-7c-3p             | 1 |
| <i>circUNC13C</i> | let-7i-3p             | 1 |
| <i>circUNC13C</i> | miR-1-3p/206          | 1 |
| <i>circUNC13C</i> | miR-1-5p              | 1 |
| <i>circUNC13C</i> | miR-10-5p             | 3 |
| <i>circUNC13C</i> | miR-100-3p            | 2 |
| <i>circUNC13C</i> | miR-101-3p.2          | 1 |
| <i>circUNC13C</i> | miR-103a-2-5p         | 1 |
| <i>circUNC13C</i> | miR-103b              | 3 |
| <i>circUNC13C</i> | miR-105-5p            | 1 |
| <i>circUNC13C</i> | miR-106a-3p           | 2 |
| <i>circUNC13C</i> | miR-1178-3p           | 1 |

|                   |                     |   |
|-------------------|---------------------|---|
| <i>circUNC13C</i> | miR-1178-5p         | 1 |
| <i>circUNC13C</i> | miR-1179            | 3 |
| <i>circUNC13C</i> | miR-1182            | 1 |
| <i>circUNC13C</i> | miR-1183            | 1 |
| <i>circUNC13C</i> | miR-1184            | 1 |
| <i>circUNC13C</i> | miR-1185-5p         | 1 |
| <i>circUNC13C</i> | miR-1193            | 2 |
| <i>circUNC13C</i> | miR-1199-5p/6751-3p | 1 |
| <i>circUNC13C</i> | miR-1202/3972       | 1 |
| <i>circUNC13C</i> | miR-1205            | 1 |
| <i>circUNC13C</i> | miR-1206            | 3 |
| <i>circUNC13C</i> | miR-1207-3p         | 2 |
| <i>circUNC13C</i> | miR-1208            | 6 |
| <i>circUNC13C</i> | miR-122-5p          | 1 |
| <i>circUNC13C</i> | miR-1224-5p         | 2 |
| <i>circUNC13C</i> | miR-1226-5p         | 1 |
| <i>circUNC13C</i> | miR-1227-3p         | 1 |
| <i>circUNC13C</i> | miR-1227-5p         | 1 |
| <i>circUNC13C</i> | miR-1228-3p         | 1 |
| <i>circUNC13C</i> | miR-1231            | 1 |
| <i>circUNC13C</i> | miR-1236-3p         | 2 |
| <i>circUNC13C</i> | miR-1238-3p         | 3 |
| <i>circUNC13C</i> | miR-1238-5p/4758-5p | 2 |
| <i>circUNC13C</i> | miR-1243            | 1 |
| <i>circUNC13C</i> | miR-1245b-3p        | 1 |
| <i>circUNC13C</i> | miR-1246            | 2 |
| <i>circUNC13C</i> | miR-1247-5p         | 1 |
| <i>circUNC13C</i> | miR-125-5p          | 3 |
| <i>circUNC13C</i> | miR-1250-3p         | 2 |
| <i>circUNC13C</i> | miR-1251-3p         | 4 |
| <i>circUNC13C</i> | miR-1251-5p         | 1 |
| <i>circUNC13C</i> | miR-1252-5p         | 1 |
| <i>circUNC13C</i> | miR-1253            | 1 |
| <i>circUNC13C</i> | miR-1254/3116       | 1 |
| <i>circUNC13C</i> | miR-1255a/1255b-5p  | 2 |
| <i>circUNC13C</i> | miR-1256            | 2 |
| <i>circUNC13C</i> | miR-125a-3p         | 1 |
| <i>circUNC13C</i> | miR-1261            | 2 |

|                   |                          |   |
|-------------------|--------------------------|---|
| <i>circUNC13C</i> | miR-1262/4701-3p/6736-5p | 2 |
| <i>circUNC13C</i> | miR-1263                 | 2 |
| <i>circUNC13C</i> | miR-1264                 | 2 |
| <i>circUNC13C</i> | miR-1265                 | 1 |
| <i>circUNC13C</i> | miR-1266-3p              | 3 |
| <i>circUNC13C</i> | miR-1266-5p/4518         | 1 |
| <i>circUNC13C</i> | miR-1267                 | 4 |
| <i>circUNC13C</i> | miR-127-5p               | 1 |
| <i>circUNC13C</i> | miR-1270                 | 3 |
| <i>circUNC13C</i> | miR-1273d                | 2 |
| <i>circUNC13C</i> | miR-1273e                | 3 |
| <i>circUNC13C</i> | miR-1273g-3p             | 4 |
| <i>circUNC13C</i> | miR-1273g-5p             | 2 |
| <i>circUNC13C</i> | miR-1275/4665-5p         | 1 |
| <i>circUNC13C</i> | miR-1276                 | 2 |
| <i>circUNC13C</i> | miR-1277-5p              | 2 |
| <i>circUNC13C</i> | miR-1278                 | 1 |
| <i>circUNC13C</i> | miR-1279                 | 2 |
| <i>circUNC13C</i> | miR-128-3p               | 1 |
| <i>circUNC13C</i> | miR-1285-5p              | 3 |
| <i>circUNC13C</i> | miR-1287-3p              | 1 |
| <i>circUNC13C</i> | miR-1287-5p              | 2 |
| <i>circUNC13C</i> | miR-1288-3p              | 1 |
| <i>circUNC13C</i> | miR-1288-5p              | 1 |
| <i>circUNC13C</i> | miR-129-3p               | 2 |
| <i>circUNC13C</i> | miR-129-5p               | 2 |
| <i>circUNC13C</i> | miR-1290                 | 3 |
| <i>circUNC13C</i> | miR-1291/6775-3p         | 1 |
| <i>circUNC13C</i> | miR-1293/4483            | 2 |
| <i>circUNC13C</i> | miR-1294                 | 1 |
| <i>circUNC13C</i> | miR-1295a                | 2 |
| <i>circUNC13C</i> | miR-1295b-3p             | 1 |
| <i>circUNC13C</i> | miR-1296-3p              | 1 |
| <i>circUNC13C</i> | miR-1296-5p              | 1 |
| <i>circUNC13C</i> | miR-1298-5p              | 1 |
| <i>circUNC13C</i> | miR-1299                 | 1 |
| <i>circUNC13C</i> | miR-1301-3p              | 1 |
| <i>circUNC13C</i> | miR-1302/4298            | 1 |



|                   |                                    |   |
|-------------------|------------------------------------|---|
| <i>circUNC13C</i> | miR-1304-5p                        | 2 |
| <i>circUNC13C</i> | miR-1305                           | 3 |
| <i>circUNC13C</i> | miR-130b-5p                        | 6 |
| <i>circUNC13C</i> | miR-1323                           | 1 |
| <i>circUNC13C</i> | miR-133a-3p.1                      | 2 |
| <i>circUNC13C</i> | miR-133a-3p.2/133b                 | 2 |
| <i>circUNC13C</i> | miR-133a-5p                        | 1 |
| <i>circUNC13C</i> | miR-134-3p                         | 1 |
| <i>circUNC13C</i> | miR-134-5p                         | 1 |
| <i>circUNC13C</i> | miR-1343-3p                        | 1 |
| <i>circUNC13C</i> | miR-135a-3p                        | 1 |
| <i>circUNC13C</i> | miR-135b-3p                        | 1 |
| <i>circUNC13C</i> | miR-136-3p                         | 1 |
| <i>circUNC13C</i> | miR-136-5p                         | 1 |
| <i>circUNC13C</i> | miR-138-5p                         | 1 |
| <i>circUNC13C</i> | miR-139-3p                         | 2 |
| <i>circUNC13C</i> | miR-140-3p.1                       | 1 |
| <i>circUNC13C</i> | miR-140-5p                         | 2 |
| <i>circUNC13C</i> | miR-141-3p/200-3p                  | 1 |
| <i>circUNC13C</i> | miR-141-5p                         | 3 |
| <i>circUNC13C</i> | miR-143-5p                         | 2 |
| <i>circUNC13C</i> | miR-144-5p                         | 1 |
| <i>circUNC13C</i> | miR-145-3p                         | 2 |
| <i>circUNC13C</i> | miR-146a-3p                        | 2 |
| <i>circUNC13C</i> | miR-1470                           | 1 |
| <i>circUNC13C</i> | miR-147a                           | 4 |
| <i>circUNC13C</i> | miR-147b                           | 1 |
| <i>circUNC13C</i> | miR-148-3p/152-3p                  | 1 |
| <i>circUNC13C</i> | miR-148a-5p                        | 2 |
| <i>circUNC13C</i> | miR-148b-5p/6874-3p                | 3 |
| <i>circUNC13C</i> | miR-149-3p/4728-5p/6785-5p/6883-5p | 1 |
| <i>circUNC13C</i> | miR-149-5p                         | 2 |
| <i>circUNC13C</i> | miR-150-3p                         | 2 |
| <i>circUNC13C</i> | miR-150-5p                         | 1 |
| <i>circUNC13C</i> | miR-152-5p                         | 1 |
| <i>circUNC13C</i> | miR-153-3p                         | 1 |
| <i>circUNC13C</i> | miR-153-5p                         | 4 |
| <i>circUNC13C</i> | miR-154-3p/487-3p                  | 4 |

|                   |                                     |   |
|-------------------|-------------------------------------|---|
| <i>circUNC13C</i> | miR-155-5p                          | 1 |
| <i>circUNC13C</i> | miR-15a-3p                          | 1 |
| <i>circUNC13C</i> | miR-15b-3p                          | 3 |
| <i>circUNC13C</i> | miR-16-1-3p                         | 1 |
| <i>circUNC13C</i> | miR-17-3p                           | 1 |
| <i>circUNC13C</i> | miR-17-5p/20-5p/93-5p/106-5p/519-3p | 2 |
| <i>circUNC13C</i> | miR-18-5p                           | 3 |
| <i>circUNC13C</i> | miR-181-3p/4420                     | 4 |
| <i>circUNC13C</i> | miR-181-5p                          | 2 |
| <i>circUNC13C</i> | miR-181c-3p                         | 1 |
| <i>circUNC13C</i> | miR-182-3p                          | 2 |
| <i>circUNC13C</i> | miR-182-5p                          | 1 |
| <i>circUNC13C</i> | miR-183-5p.2                        | 1 |
| <i>circUNC13C</i> | miR-185-3p                          | 3 |
| <i>circUNC13C</i> | miR-185-5p                          | 1 |
| <i>circUNC13C</i> | miR-186-5p                          | 2 |
| <i>circUNC13C</i> | miR-188-5p                          | 2 |
| <i>circUNC13C</i> | miR-18a-3p                          | 2 |
| <i>circUNC13C</i> | miR-19-3p                           | 1 |
| <i>circUNC13C</i> | miR-19-5p                           | 2 |
| <i>circUNC13C</i> | miR-1909-5p                         | 2 |
| <i>circUNC13C</i> | miR-1911-5p                         | 1 |
| <i>circUNC13C</i> | miR-1914-5p                         | 1 |
| <i>circUNC13C</i> | miR-1915-3p/6764-5p                 | 1 |
| <i>circUNC13C</i> | miR-1915-5p                         | 2 |
| <i>circUNC13C</i> | miR-192-3p                          | 1 |
| <i>circUNC13C</i> | miR-192-5p/215-5p                   | 1 |
| <i>circUNC13C</i> | miR-193-3p                          | 4 |
| <i>circUNC13C</i> | miR-193b-5p                         | 3 |
| <i>circUNC13C</i> | miR-194-3p                          | 3 |
| <i>circUNC13C</i> | miR-196a-3p                         | 1 |
| <i>circUNC13C</i> | miR-200-3p/429                      | 1 |
| <i>circUNC13C</i> | miR-200c-5p/550a-3p                 | 1 |
| <i>circUNC13C</i> | miR-202-3p                          | 1 |
| <i>circUNC13C</i> | miR-203a-5p                         | 2 |
| <i>circUNC13C</i> | miR-203b-3p                         | 1 |
| <i>circUNC13C</i> | miR-204-3p/4646-5p                  | 2 |
| <i>circUNC13C</i> | miR-204-5p/211-5p                   | 3 |

|                   |                    |   |
|-------------------|--------------------|---|
| <i>circUNC13C</i> | miR-205-3p         | 2 |
| <i>circUNC13C</i> | miR-2052           | 2 |
| <i>circUNC13C</i> | miR-2054           | 1 |
| <i>circUNC13C</i> | miR-208-3p         | 2 |
| <i>circUNC13C</i> | miR-20a-3p         | 1 |
| <i>circUNC13C</i> | miR-21-3p/3591-3p  | 1 |
| <i>circUNC13C</i> | miR-21-5p/590-5p   | 1 |
| <i>circUNC13C</i> | miR-210-3p         | 1 |
| <i>circUNC13C</i> | miR-211-3p         | 2 |
| <i>circUNC13C</i> | miR-2110           | 1 |
| <i>circUNC13C</i> | miR-2113           | 1 |
| <i>circUNC13C</i> | miR-2115-3p        | 2 |
| <i>circUNC13C</i> | miR-2115-5p        | 1 |
| <i>circUNC13C</i> | miR-2116-3p        | 1 |
| <i>circUNC13C</i> | miR-2116-5p        | 1 |
| <i>circUNC13C</i> | miR-212-5p         | 2 |
| <i>circUNC13C</i> | miR-214-3p/3619-5p | 1 |
| <i>circUNC13C</i> | miR-214-5p         | 1 |
| <i>circUNC13C</i> | miR-215-3p         | 2 |
| <i>circUNC13C</i> | miR-216a-5p        | 2 |
| <i>circUNC13C</i> | miR-216b-5p        | 2 |
| <i>circUNC13C</i> | miR-218-1-3p       | 2 |
| <i>circUNC13C</i> | miR-218-2-3p       | 2 |
| <i>circUNC13C</i> | miR-218-5p         | 2 |
| <i>circUNC13C</i> | miR-219-5p         | 1 |
| <i>circUNC13C</i> | miR-219a-2-3p      | 1 |
| <i>circUNC13C</i> | miR-219b-3p        | 1 |
| <i>circUNC13C</i> | miR-219b-5p        | 2 |
| <i>circUNC13C</i> | miR-22-3p          | 2 |
| <i>circUNC13C</i> | miR-22-5p          | 1 |
| <i>circUNC13C</i> | miR-221-5p/8073    | 1 |
| <i>circUNC13C</i> | miR-222-5p         | 2 |
| <i>circUNC13C</i> | miR-223-5p         | 1 |
| <i>circUNC13C</i> | miR-2276-5p        | 2 |
| <i>circUNC13C</i> | miR-2278           | 1 |
| <i>circUNC13C</i> | miR-23-3p          | 1 |
| <i>circUNC13C</i> | miR-2355-5p        | 2 |
| <i>circUNC13C</i> | miR-2392           | 3 |

|                   |                                              |   |
|-------------------|----------------------------------------------|---|
| <i>circUNC13C</i> | miR-2467-5p                                  | 1 |
| <i>circUNC13C</i> | miR-26-5p                                    | 1 |
| <i>circUNC13C</i> | miR-2681-3p                                  | 3 |
| <i>circUNC13C</i> | miR-26b-3p                                   | 3 |
| <i>circUNC13C</i> | miR-27b-5p                                   | 2 |
| <i>circUNC13C</i> | miR-296-3p                                   | 1 |
| <i>circUNC13C</i> | miR-29a-5p                                   | 7 |
| <i>circUNC13C</i> | miR-29b-1-5p                                 | 3 |
| <i>circUNC13C</i> | miR-29b-2-5p                                 | 4 |
| <i>circUNC13C</i> | miR-30-3p                                    | 3 |
| <i>circUNC13C</i> | miR-30-5p                                    | 2 |
| <i>circUNC13C</i> | miR-301a-5p/301b-5p                          | 6 |
| <i>circUNC13C</i> | miR-302-3p/372-3p/373-3p/520-3p              | 1 |
| <i>circUNC13C</i> | miR-302a-5p                                  | 2 |
| <i>circUNC13C</i> | miR-302c-3p.2/520-3p                         | 3 |
| <i>circUNC13C</i> | miR-3064-5p                                  | 1 |
| <i>circUNC13C</i> | miR-3074-3p                                  | 1 |
| <i>circUNC13C</i> | miR-3074-5p                                  | 2 |
| <i>circUNC13C</i> | miR-30b-3p/1273h-5p/3689-3p/6779-5p/6780a-5p | 1 |
| <i>circUNC13C</i> | miR-30c-3p/6788-5p                           | 1 |
| <i>circUNC13C</i> | miR-3115                                     | 1 |
| <i>circUNC13C</i> | miR-3119                                     | 3 |
| <i>circUNC13C</i> | miR-3121-5p                                  | 4 |
| <i>circUNC13C</i> | miR-3122/3913-5p                             | 2 |
| <i>circUNC13C</i> | miR-3124-3p                                  | 1 |
| <i>circUNC13C</i> | miR-3125/3916/6859-5p                        | 1 |
| <i>circUNC13C</i> | miR-3126-5p                                  | 1 |
| <i>circUNC13C</i> | miR-3128                                     | 2 |
| <i>circUNC13C</i> | miR-3133                                     | 2 |
| <i>circUNC13C</i> | miR-3134                                     | 1 |
| <i>circUNC13C</i> | miR-3135b                                    | 2 |
| <i>circUNC13C</i> | miR-3136-5p/4439                             | 1 |
| <i>circUNC13C</i> | miR-3140-3p                                  | 4 |
| <i>circUNC13C</i> | miR-3140-5p                                  | 2 |
| <i>circUNC13C</i> | miR-3148                                     | 2 |
| <i>circUNC13C</i> | miR-3149                                     | 1 |
| <i>circUNC13C</i> | miR-3150a-3p                                 | 1 |
| <i>circUNC13C</i> | miR-3150a-5p/3150b-5p                        | 1 |

|                   |                          |   |
|-------------------|--------------------------|---|
| <i>circUNC13C</i> | miR-3150b-3p             | 2 |
| <i>circUNC13C</i> | miR-3151-5p              | 3 |
| <i>circUNC13C</i> | miR-3152-5p              | 1 |
| <i>circUNC13C</i> | miR-3153/6733-5p/6739-5p | 1 |
| <i>circUNC13C</i> | miR-3154                 | 1 |
| <i>circUNC13C</i> | miR-3156-5p              | 5 |
| <i>circUNC13C</i> | miR-3157-3p              | 3 |
| <i>circUNC13C</i> | miR-3157-5p              | 1 |
| <i>circUNC13C</i> | miR-3158-3p              | 1 |
| <i>circUNC13C</i> | miR-3158-5p              | 1 |
| <i>circUNC13C</i> | miR-3159                 | 1 |
| <i>circUNC13C</i> | miR-3160-3p              | 2 |
| <i>circUNC13C</i> | miR-3160-5p              | 1 |
| <i>circUNC13C</i> | miR-3161                 | 1 |
| <i>circUNC13C</i> | miR-3164                 | 1 |
| <i>circUNC13C</i> | miR-3165                 | 1 |
| <i>circUNC13C</i> | miR-3168                 | 3 |
| <i>circUNC13C</i> | miR-3169                 | 1 |
| <i>circUNC13C</i> | miR-3170/6855-5p         | 1 |
| <i>circUNC13C</i> | miR-3176/3922-3p         | 3 |
| <i>circUNC13C</i> | miR-3182                 | 1 |
| <i>circUNC13C</i> | miR-3184-3p              | 2 |
| <i>circUNC13C</i> | miR-3185                 | 1 |
| <i>circUNC13C</i> | miR-3187-3p              | 2 |
| <i>circUNC13C</i> | miR-3188                 | 1 |
| <i>circUNC13C</i> | miR-3189-3p              | 2 |
| <i>circUNC13C</i> | miR-3190-5p              | 3 |
| <i>circUNC13C</i> | miR-3191-5p              | 3 |
| <i>circUNC13C</i> | miR-3192-3p              | 4 |
| <i>circUNC13C</i> | miR-3192-5p              | 2 |
| <i>circUNC13C</i> | miR-3194-3p              | 2 |
| <i>circUNC13C</i> | miR-3194-5p              | 1 |
| <i>circUNC13C</i> | miR-3198/4309            | 2 |
| <i>circUNC13C</i> | miR-3199/8052            | 1 |
| <i>circUNC13C</i> | miR-32-3p                | 4 |
| <i>circUNC13C</i> | miR-320                  | 3 |
| <i>circUNC13C</i> | miR-3200-5p              | 5 |
| <i>circUNC13C</i> | miR-320e                 | 3 |

|                   |                           |   |
|-------------------|---------------------------|---|
| <i>circUNC13C</i> | miR-323b-5p/410-5p/494-5p | 1 |
| <i>circUNC13C</i> | miR-324-3p/1913           | 2 |
| <i>circUNC13C</i> | miR-324-5p                | 1 |
| <i>circUNC13C</i> | miR-326                   | 2 |
| <i>circUNC13C</i> | miR-329-3p/362-3p         | 1 |
| <i>circUNC13C</i> | miR-33-5p                 | 2 |
| <i>circUNC13C</i> | miR-330-3p                | 1 |
| <i>circUNC13C</i> | miR-330-3p.2              | 1 |
| <i>circUNC13C</i> | miR-335-3p                | 3 |
| <i>circUNC13C</i> | miR-337-3p                | 1 |
| <i>circUNC13C</i> | miR-338-3p                | 2 |
| <i>circUNC13C</i> | miR-339-5p                | 1 |
| <i>circUNC13C</i> | miR-33a-3p                | 2 |
| <i>circUNC13C</i> | miR-33b-3p/515-3p/519e-3p | 1 |
| <i>circUNC13C</i> | miR-34-5p/449-5p          | 4 |
| <i>circUNC13C</i> | miR-345-3p                | 2 |
| <i>circUNC13C</i> | miR-345-5p                | 1 |
| <i>circUNC13C</i> | miR-346                   | 1 |
| <i>circUNC13C</i> | miR-34a-3p                | 1 |
| <i>circUNC13C</i> | miR-34b-3p                | 6 |
| <i>circUNC13C</i> | miR-34c-3p                | 6 |
| <i>circUNC13C</i> | miR-3605-3p               | 1 |
| <i>circUNC13C</i> | miR-3605-5p               | 1 |
| <i>circUNC13C</i> | miR-3606-5p               | 1 |
| <i>circUNC13C</i> | miR-3607-3p               | 3 |
| <i>circUNC13C</i> | miR-3607-5p               | 1 |
| <i>circUNC13C</i> | miR-361-5p                | 1 |
| <i>circUNC13C</i> | miR-3613-3p               | 1 |
| <i>circUNC13C</i> | miR-3615                  | 1 |
| <i>circUNC13C</i> | miR-3617-3p               | 1 |
| <i>circUNC13C</i> | miR-3619-3p               | 1 |
| <i>circUNC13C</i> | miR-362-5p/500b-5p        | 1 |
| <i>circUNC13C</i> | miR-3620-3p               | 1 |
| <i>circUNC13C</i> | miR-3622b-5p              | 1 |
| <i>circUNC13C</i> | miR-363-5p/6745           | 2 |
| <i>circUNC13C</i> | miR-365-3p                | 1 |
| <i>circUNC13C</i> | miR-3651                  | 1 |
| <i>circUNC13C</i> | miR-3653-3p               | 2 |

|                   |                     |   |
|-------------------|---------------------|---|
| <i>circUNC13C</i> | miR-3654            | 1 |
| <i>circUNC13C</i> | miR-3657            | 1 |
| <i>circUNC13C</i> | miR-3658            | 1 |
| <i>circUNC13C</i> | miR-365a-5p/365b-5p | 1 |
| <i>circUNC13C</i> | miR-3660/4526       | 1 |
| <i>circUNC13C</i> | miR-3663-5p         | 1 |
| <i>circUNC13C</i> | miR-3664-3p         | 1 |
| <i>circUNC13C</i> | miR-3664-5p         | 4 |
| <i>circUNC13C</i> | miR-3667-3p         | 3 |
| <i>circUNC13C</i> | miR-3668            | 2 |
| <i>circUNC13C</i> | miR-367-5p          | 4 |
| <i>circUNC13C</i> | miR-3670            | 1 |
| <i>circUNC13C</i> | miR-3671            | 2 |
| <i>circUNC13C</i> | miR-3674            | 1 |
| <i>circUNC13C</i> | miR-3679-3p         | 1 |
| <i>circUNC13C</i> | miR-3680-3p         | 5 |
| <i>circUNC13C</i> | miR-3681-5p         | 2 |
| <i>circUNC13C</i> | miR-3682-5p         | 3 |
| <i>circUNC13C</i> | miR-3688-5p         | 5 |
| <i>circUNC13C</i> | miR-3691-3p         | 1 |
| <i>circUNC13C</i> | miR-3691-5p         | 3 |
| <i>circUNC13C</i> | miR-3692-3p         | 1 |
| <i>circUNC13C</i> | miR-3692-5p         | 4 |
| <i>circUNC13C</i> | miR-3713            | 1 |
| <i>circUNC13C</i> | miR-371a-3p         | 1 |
| <i>circUNC13C</i> | miR-371b-3p         | 1 |
| <i>circUNC13C</i> | miR-374-5p          | 2 |
| <i>circUNC13C</i> | miR-374-5p/655-3p   | 1 |
| <i>circUNC13C</i> | miR-374a-3p         | 3 |
| <i>circUNC13C</i> | miR-374b-3p         | 4 |
| <i>circUNC13C</i> | miR-375             | 7 |
| <i>circUNC13C</i> | miR-376b-5p/376c-5p | 2 |
| <i>circUNC13C</i> | miR-378-3p          | 2 |
| <i>circUNC13C</i> | miR-380-3p          | 2 |
| <i>circUNC13C</i> | miR-382-3p          | 1 |
| <i>circUNC13C</i> | miR-382-5p          | 2 |
| <i>circUNC13C</i> | miR-383-5p.2        | 2 |
| <i>circUNC13C</i> | miR-3907            | 1 |

|                   |                     |   |
|-------------------|---------------------|---|
| <i>circUNC13C</i> | miR-3909            | 1 |
| <i>circUNC13C</i> | miR-3911            | 2 |
| <i>circUNC13C</i> | miR-3912-5p         | 1 |
| <i>circUNC13C</i> | miR-3913-3p         | 2 |
| <i>circUNC13C</i> | miR-3914            | 2 |
| <i>circUNC13C</i> | miR-3915            | 2 |
| <i>circUNC13C</i> | miR-3918            | 2 |
| <i>circUNC13C</i> | miR-3919            | 1 |
| <i>circUNC13C</i> | miR-3920            | 5 |
| <i>circUNC13C</i> | miR-3921/4653-5p    | 6 |
| <i>circUNC13C</i> | miR-3922-5p         | 2 |
| <i>circUNC13C</i> | miR-3923            | 1 |
| <i>circUNC13C</i> | miR-3925-3p         | 3 |
| <i>circUNC13C</i> | miR-3926            | 1 |
| <i>circUNC13C</i> | miR-3927-5p         | 1 |
| <i>circUNC13C</i> | miR-3928-3p         | 1 |
| <i>circUNC13C</i> | miR-3928-5p/6806-3p | 2 |
| <i>circUNC13C</i> | miR-3929/4419b/4478 | 2 |
| <i>circUNC13C</i> | miR-3934-5p         | 1 |
| <i>circUNC13C</i> | miR-3935            | 1 |
| <i>circUNC13C</i> | miR-3938            | 2 |
| <i>circUNC13C</i> | miR-3940-5p/4507    | 2 |
| <i>circUNC13C</i> | miR-3941            | 1 |
| <i>circUNC13C</i> | miR-3942-3p         | 2 |
| <i>circUNC13C</i> | miR-3945            | 3 |
| <i>circUNC13C</i> | miR-3973            | 2 |
| <i>circUNC13C</i> | miR-3974            | 1 |
| <i>circUNC13C</i> | miR-3975            | 1 |
| <i>circUNC13C</i> | miR-3977            | 1 |
| <i>circUNC13C</i> | miR-3978            | 2 |
| <i>circUNC13C</i> | miR-409-3p          | 1 |
| <i>circUNC13C</i> | miR-409-5p          | 1 |
| <i>circUNC13C</i> | miR-410-3p          | 1 |
| <i>circUNC13C</i> | miR-411-5p.1        | 1 |
| <i>circUNC13C</i> | miR-412-3p/6754-3p  | 1 |
| <i>circUNC13C</i> | miR-412-5p          | 1 |
| <i>circUNC13C</i> | miR-421             | 2 |
| <i>circUNC13C</i> | miR-423-5p          | 1 |



|                   |                           |   |
|-------------------|---------------------------|---|
| <i>circUNC13C</i> | miR-425-5p                | 1 |
| <i>circUNC13C</i> | miR-4251                  | 1 |
| <i>circUNC13C</i> | miR-4252                  | 2 |
| <i>circUNC13C</i> | miR-4253/6862-5p          | 3 |
| <i>circUNC13C</i> | miR-4256                  | 2 |
| <i>circUNC13C</i> | miR-4257                  | 2 |
| <i>circUNC13C</i> | miR-4260                  | 1 |
| <i>circUNC13C</i> | miR-4263                  | 1 |
| <i>circUNC13C</i> | miR-4264                  | 2 |
| <i>circUNC13C</i> | miR-4265/4296/4322        | 1 |
| <i>circUNC13C</i> | miR-4268                  | 1 |
| <i>circUNC13C</i> | miR-4271/4725-3p/6780b-5p | 1 |
| <i>circUNC13C</i> | miR-4272                  | 4 |
| <i>circUNC13C</i> | miR-4273/7156-5p          | 1 |
| <i>circUNC13C</i> | miR-4274                  | 3 |
| <i>circUNC13C</i> | miR-4276                  | 1 |
| <i>circUNC13C</i> | miR-4277                  | 1 |
| <i>circUNC13C</i> | miR-4280                  | 2 |
| <i>circUNC13C</i> | miR-4282                  | 1 |
| <i>circUNC13C</i> | miR-4287/4685-3p          | 1 |
| <i>circUNC13C</i> | miR-4289                  | 2 |
| <i>circUNC13C</i> | miR-4290                  | 3 |
| <i>circUNC13C</i> | miR-4292/6791-5p          | 1 |
| <i>circUNC13C</i> | miR-4299                  | 1 |
| <i>circUNC13C</i> | miR-4301                  | 2 |
| <i>circUNC13C</i> | miR-4302                  | 1 |
| <i>circUNC13C</i> | miR-4303                  | 6 |
| <i>circUNC13C</i> | miR-4307                  | 2 |
| <i>circUNC13C</i> | miR-4308                  | 1 |
| <i>circUNC13C</i> | miR-431-5p                | 2 |
| <i>circUNC13C</i> | miR-4311                  | 2 |
| <i>circUNC13C</i> | miR-4312                  | 2 |
| <i>circUNC13C</i> | miR-4314                  | 1 |
| <i>circUNC13C</i> | miR-4315                  | 1 |
| <i>circUNC13C</i> | miR-4316                  | 1 |
| <i>circUNC13C</i> | miR-4318                  | 4 |
| <i>circUNC13C</i> | miR-432-3p                | 3 |
| <i>circUNC13C</i> | miR-432-5p                | 4 |

|                   |                                              |   |
|-------------------|----------------------------------------------|---|
| <i>circUNC13C</i> | miR-4326                                     | 3 |
| <i>circUNC13C</i> | miR-4327                                     | 2 |
| <i>circUNC13C</i> | miR-4328                                     | 5 |
| <i>circUNC13C</i> | miR-4329                                     | 1 |
| <i>circUNC13C</i> | miR-433-3p                                   | 1 |
| <i>circUNC13C</i> | miR-4330                                     | 2 |
| <i>circUNC13C</i> | miR-4419a/4510/6127/6129/6130/6133           | 1 |
| <i>circUNC13C</i> | miR-4422                                     | 1 |
| <i>circUNC13C</i> | miR-4424                                     | 2 |
| <i>circUNC13C</i> | miR-4426/4647/4662b                          | 1 |
| <i>circUNC13C</i> | miR-4427                                     | 2 |
| <i>circUNC13C</i> | miR-4432                                     | 3 |
| <i>circUNC13C</i> | miR-4433a-3p                                 | 1 |
| <i>circUNC13C</i> | miR-4434/4516/5703                           | 2 |
| <i>circUNC13C</i> | miR-4435                                     | 2 |
| <i>circUNC13C</i> | miR-4436b-3p/4632-5p/6735-5p/6879-5p/7843-5p | 2 |
| <i>circUNC13C</i> | miR-4436b-5p                                 | 2 |
| <i>circUNC13C</i> | miR-4437                                     | 1 |
| <i>circUNC13C</i> | miR-4445-5p                                  | 1 |
| <i>circUNC13C</i> | miR-4446-3p                                  | 1 |
| <i>circUNC13C</i> | miR-4446-5p                                  | 3 |
| <i>circUNC13C</i> | miR-4447/4472                                | 3 |
| <i>circUNC13C</i> | miR-4448                                     | 1 |
| <i>circUNC13C</i> | miR-4450                                     | 1 |
| <i>circUNC13C</i> | miR-4453/4538                                | 1 |
| <i>circUNC13C</i> | miR-4456                                     | 1 |
| <i>circUNC13C</i> | miR-4457                                     | 1 |
| <i>circUNC13C</i> | miR-4459                                     | 1 |
| <i>circUNC13C</i> | miR-4461                                     | 2 |
| <i>circUNC13C</i> | miR-4463                                     | 3 |
| <i>circUNC13C</i> | miR-4469                                     | 1 |
| <i>circUNC13C</i> | miR-4474-3p                                  | 1 |
| <i>circUNC13C</i> | miR-4477b                                    | 1 |
| <i>circUNC13C</i> | miR-448                                      | 1 |
| <i>circUNC13C</i> | miR-4480                                     | 1 |
| <i>circUNC13C</i> | miR-4481/4745-5p                             | 1 |
| <i>circUNC13C</i> | miR-4482-3p                                  | 1 |
| <i>circUNC13C</i> | miR-4487                                     | 2 |

|                   |                   |   |
|-------------------|-------------------|---|
| <i>circUNC13C</i> | miR-4494          | 1 |
| <i>circUNC13C</i> | miR-4495          | 2 |
| <i>circUNC13C</i> | miR-4499          | 3 |
| <i>circUNC13C</i> | miR-4502          | 2 |
| <i>circUNC13C</i> | miR-4503          | 1 |
| <i>circUNC13C</i> | miR-4506          | 1 |
| <i>circUNC13C</i> | miR-450a-1-3p     | 2 |
| <i>circUNC13C</i> | miR-450a-2-3p     | 1 |
| <i>circUNC13C</i> | miR-450b-5p       | 5 |
| <i>circUNC13C</i> | miR-4513/6855-3p  | 1 |
| <i>circUNC13C</i> | miR-4515          | 1 |
| <i>circUNC13C</i> | miR-4519          | 3 |
| <i>circUNC13C</i> | miR-452-3p        | 6 |
| <i>circUNC13C</i> | miR-452-5p/892-3p | 3 |
| <i>circUNC13C</i> | miR-4520-3p       | 2 |
| <i>circUNC13C</i> | miR-4522          | 2 |
| <i>circUNC13C</i> | miR-4524-5p       | 2 |
| <i>circUNC13C</i> | miR-4524a-3p      | 1 |
| <i>circUNC13C</i> | miR-4524b-3p      | 1 |
| <i>circUNC13C</i> | miR-4527/6503-5p  | 1 |
| <i>circUNC13C</i> | miR-4528          | 2 |
| <i>circUNC13C</i> | miR-4529-5p       | 1 |
| <i>circUNC13C</i> | miR-4530          | 2 |
| <i>circUNC13C</i> | miR-4531          | 3 |
| <i>circUNC13C</i> | miR-4534/8082     | 1 |
| <i>circUNC13C</i> | miR-4535          | 1 |
| <i>circUNC13C</i> | miR-4536-5p       | 2 |
| <i>circUNC13C</i> | miR-4539          | 2 |
| <i>circUNC13C</i> | miR-4540          | 1 |
| <i>circUNC13C</i> | miR-455-3p.2      | 2 |
| <i>circUNC13C</i> | miR-4633-5p       | 1 |
| <i>circUNC13C</i> | miR-4635          | 4 |
| <i>circUNC13C</i> | miR-4637          | 1 |
| <i>circUNC13C</i> | miR-4638-3p       | 2 |
| <i>circUNC13C</i> | miR-4639-3p       | 1 |
| <i>circUNC13C</i> | miR-4642          | 1 |
| <i>circUNC13C</i> | miR-4643          | 1 |
| <i>circUNC13C</i> | miR-4645-3p       | 1 |

|                   |                       |   |
|-------------------|-----------------------|---|
| <i>circUNC13C</i> | miR-4649-3p           | 2 |
| <i>circUNC13C</i> | miR-4652-3p           | 5 |
| <i>circUNC13C</i> | miR-4655-3p           | 1 |
| <i>circUNC13C</i> | miR-4658/6790-5p      | 2 |
| <i>circUNC13C</i> | miR-4659a-3p/4659b-3p | 2 |
| <i>circUNC13C</i> | miR-4659a-5p/4659b-5p | 4 |
| <i>circUNC13C</i> | miR-466               | 4 |
| <i>circUNC13C</i> | miR-4662-5p           | 2 |
| <i>circUNC13C</i> | miR-4662a-3p          | 1 |
| <i>circUNC13C</i> | miR-4663              | 1 |
| <i>circUNC13C</i> | miR-4667-3p           | 1 |
| <i>circUNC13C</i> | miR-4668-3p           | 5 |
| <i>circUNC13C</i> | miR-4668-5p           | 1 |
| <i>circUNC13C</i> | miR-4669              | 1 |
| <i>circUNC13C</i> | miR-4670-3p           | 1 |
| <i>circUNC13C</i> | miR-4671-5p           | 1 |
| <i>circUNC13C</i> | miR-4672              | 1 |
| <i>circUNC13C</i> | miR-4677-3p           | 2 |
| <i>circUNC13C</i> | miR-4677-5p           | 1 |
| <i>circUNC13C</i> | miR-4679              | 2 |
| <i>circUNC13C</i> | miR-4680-3p           | 2 |
| <i>circUNC13C</i> | miR-4680-5p           | 2 |
| <i>circUNC13C</i> | miR-4682              | 4 |
| <i>circUNC13C</i> | miR-4683              | 2 |
| <i>circUNC13C</i> | miR-4684-3p           | 1 |
| <i>circUNC13C</i> | miR-4684-5p           | 1 |
| <i>circUNC13C</i> | miR-4685-5p/6837-5p   | 2 |
| <i>circUNC13C</i> | miR-4686              | 2 |
| <i>circUNC13C</i> | miR-4687-3p           | 1 |
| <i>circUNC13C</i> | miR-4687-5p           | 2 |
| <i>circUNC13C</i> | miR-4689/6858-5p      | 2 |
| <i>circUNC13C</i> | miR-4691-3p           | 3 |
| <i>circUNC13C</i> | miR-4694-5p           | 2 |
| <i>circUNC13C</i> | miR-4695-3p           | 2 |
| <i>circUNC13C</i> | miR-4699-5p           | 2 |
| <i>circUNC13C</i> | miR-4700-3p           | 1 |
| <i>circUNC13C</i> | miR-4704-3p           | 1 |
| <i>circUNC13C</i> | miR-4708-3p           | 2 |

|                   |                                  |   |
|-------------------|----------------------------------|---|
| <i>circUNC13C</i> | miR-4709-3p                      | 3 |
| <i>circUNC13C</i> | miR-4710                         | 1 |
| <i>circUNC13C</i> | miR-4713-5p                      | 1 |
| <i>circUNC13C</i> | miR-4714-3p                      | 1 |
| <i>circUNC13C</i> | miR-4714-5p                      | 4 |
| <i>circUNC13C</i> | miR-4716-5p                      | 1 |
| <i>circUNC13C</i> | miR-4717-5p                      | 1 |
| <i>circUNC13C</i> | miR-4720-3p                      | 3 |
| <i>circUNC13C</i> | miR-4720-5p/4799-3p/5588-5p      | 2 |
| <i>circUNC13C</i> | miR-4723-5p/5698/6870-5p/7111-5p | 1 |
| <i>circUNC13C</i> | miR-4724-5p                      | 2 |
| <i>circUNC13C</i> | miR-4726-3p                      | 1 |
| <i>circUNC13C</i> | miR-4727-5p                      | 3 |
| <i>circUNC13C</i> | miR-4728-3p                      | 1 |
| <i>circUNC13C</i> | miR-4729                         | 3 |
| <i>circUNC13C</i> | miR-4731-3p/4801                 | 2 |
| <i>circUNC13C</i> | miR-4732-3p                      | 3 |
| <i>circUNC13C</i> | miR-4732-5p                      | 1 |
| <i>circUNC13C</i> | miR-4740-5p                      | 1 |
| <i>circUNC13C</i> | miR-4743-3p                      | 5 |
| <i>circUNC13C</i> | miR-4746-5p                      | 1 |
| <i>circUNC13C</i> | miR-4747-3p                      | 1 |
| <i>circUNC13C</i> | miR-4747-5p/5196-5p              | 2 |
| <i>circUNC13C</i> | miR-4753-3p                      | 4 |
| <i>circUNC13C</i> | miR-4755-3p                      | 2 |
| <i>circUNC13C</i> | miR-4755-5p/5006-3p              | 3 |
| <i>circUNC13C</i> | miR-4756-3p                      | 1 |
| <i>circUNC13C</i> | miR-4757-5p/6744-3p              | 1 |
| <i>circUNC13C</i> | miR-4759                         | 1 |
| <i>circUNC13C</i> | miR-4760-3p                      | 2 |
| <i>circUNC13C</i> | miR-4761-3p                      | 2 |
| <i>circUNC13C</i> | miR-4762-3p                      | 3 |
| <i>circUNC13C</i> | miR-4762-5p                      | 1 |
| <i>circUNC13C</i> | miR-4764-3p                      | 1 |
| <i>circUNC13C</i> | miR-4764-5p                      | 1 |
| <i>circUNC13C</i> | miR-4766-3p                      | 1 |
| <i>circUNC13C</i> | miR-4766-5p                      | 3 |
| <i>circUNC13C</i> | miR-4768-3p                      | 1 |

|                   |                     |   |
|-------------------|---------------------|---|
| <i>circUNC13C</i> | miR-4768-5p/6833-3p | 5 |
| <i>circUNC13C</i> | miR-4769-3p/6817-5p | 3 |
| <i>circUNC13C</i> | miR-4774-3p         | 1 |
| <i>circUNC13C</i> | miR-4776-5p         | 1 |
| <i>circUNC13C</i> | miR-4778-3p         | 4 |
| <i>circUNC13C</i> | miR-4778-5p         | 3 |
| <i>circUNC13C</i> | miR-4780            | 1 |
| <i>circUNC13C</i> | miR-4781-3p         | 1 |
| <i>circUNC13C</i> | miR-4782-5p/5706    | 1 |
| <i>circUNC13C</i> | miR-4783-3p         | 1 |
| <i>circUNC13C</i> | miR-4789-3p         | 1 |
| <i>circUNC13C</i> | miR-4792            | 1 |
| <i>circUNC13C</i> | miR-4793-5p         | 2 |
| <i>circUNC13C</i> | miR-4797-3p         | 2 |
| <i>circUNC13C</i> | miR-4798-5p         | 1 |
| <i>circUNC13C</i> | miR-4802-5p         | 4 |
| <i>circUNC13C</i> | miR-4803            | 2 |
| <i>circUNC13C</i> | miR-4804-3p         | 3 |
| <i>circUNC13C</i> | miR-483-3p.1        | 1 |
| <i>circUNC13C</i> | miR-484/3155        | 2 |
| <i>circUNC13C</i> | miR-485-5p          | 1 |
| <i>circUNC13C</i> | miR-486-3p          | 1 |
| <i>circUNC13C</i> | miR-487a-5p/487b-5p | 1 |
| <i>circUNC13C</i> | miR-488-3p          | 3 |
| <i>circUNC13C</i> | miR-488-5p          | 1 |
| <i>circUNC13C</i> | miR-489-3p          | 1 |
| <i>circUNC13C</i> | miR-489-5p          | 1 |
| <i>circUNC13C</i> | miR-490-5p          | 4 |
| <i>circUNC13C</i> | miR-491-5p          | 3 |
| <i>circUNC13C</i> | miR-493-5p          | 1 |
| <i>circUNC13C</i> | miR-495-5p          | 2 |
| <i>circUNC13C</i> | miR-497-3p          | 1 |
| <i>circUNC13C</i> | miR-498             | 1 |
| <i>circUNC13C</i> | miR-499a-3p/499b-3p | 4 |
| <i>circUNC13C</i> | miR-499a-5p         | 2 |
| <i>circUNC13C</i> | miR-499b-5p         | 1 |
| <i>circUNC13C</i> | miR-5000-5p         | 2 |
| <i>circUNC13C</i> | miR-5001-3p         | 3 |

|                   |                             |   |
|-------------------|-----------------------------|---|
| <i>circUNC13C</i> | miR-5002-3p                 | 1 |
| <i>circUNC13C</i> | miR-5002-5p                 | 7 |
| <i>circUNC13C</i> | miR-5003-3p                 | 1 |
| <i>circUNC13C</i> | miR-5004-3p                 | 2 |
| <i>circUNC13C</i> | miR-5006-5p                 | 1 |
| <i>circUNC13C</i> | miR-5007-3p                 | 4 |
| <i>circUNC13C</i> | miR-5007-5p                 | 1 |
| <i>circUNC13C</i> | miR-5008-3p/6737-3p/7157-3p | 2 |
| <i>circUNC13C</i> | miR-5009-3p                 | 2 |
| <i>circUNC13C</i> | miR-501-3p/502-3p           | 1 |
| <i>circUNC13C</i> | miR-501-5p                  | 1 |
| <i>circUNC13C</i> | miR-5010-3p                 | 1 |
| <i>circUNC13C</i> | miR-5010-5p                 | 1 |
| <i>circUNC13C</i> | miR-502-5p                  | 2 |
| <i>circUNC13C</i> | miR-504-5p.1                | 3 |
| <i>circUNC13C</i> | miR-505-3p.2                | 2 |
| <i>circUNC13C</i> | miR-505-5p                  | 1 |
| <i>circUNC13C</i> | miR-506-5p                  | 1 |
| <i>circUNC13C</i> | miR-507/557                 | 5 |
| <i>circUNC13C</i> | miR-508-3p                  | 1 |
| <i>circUNC13C</i> | miR-5087                    | 1 |
| <i>circUNC13C</i> | miR-5088-5p                 | 1 |
| <i>circUNC13C</i> | miR-5089-3p                 | 2 |
| <i>circUNC13C</i> | miR-5092                    | 1 |
| <i>circUNC13C</i> | miR-5095/7151-3p            | 1 |
| <i>circUNC13C</i> | miR-5096                    | 2 |
| <i>circUNC13C</i> | miR-510-3p                  | 4 |
| <i>circUNC13C</i> | miR-510-5p                  | 1 |
| <i>circUNC13C</i> | miR-5100                    | 1 |
| <i>circUNC13C</i> | miR-511-3p                  | 1 |
| <i>circUNC13C</i> | miR-511-5p                  | 1 |
| <i>circUNC13C</i> | miR-512-3p                  | 3 |
| <i>circUNC13C</i> | miR-512-5p                  | 1 |
| <i>circUNC13C</i> | miR-513a-3p/513c-3p/3606-3p | 2 |
| <i>circUNC13C</i> | miR-513b-3p                 | 1 |
| <i>circUNC13C</i> | miR-514a-5p                 | 4 |
| <i>circUNC13C</i> | miR-515-5p/519e-5p          | 2 |
| <i>circUNC13C</i> | miR-516a-3p/516b-3p/7162-5p | 1 |

|                   |                                                                  |   |
|-------------------|------------------------------------------------------------------|---|
| <i>circUNC13C</i> | miR-516a-5p                                                      | 1 |
| <i>circUNC13C</i> | miR-516b-5p                                                      | 1 |
| <i>circUNC13C</i> | miR-517-5p                                                       | 1 |
| <i>circUNC13C</i> | miR-5186                                                         | 2 |
| <i>circUNC13C</i> | miR-5187-3p                                                      | 2 |
| <i>circUNC13C</i> | miR-5189-3p                                                      | 1 |
| <i>circUNC13C</i> | miR-518a-5p/527                                                  | 1 |
| <i>circUNC13C</i> | miR-518c-5p                                                      | 2 |
| <i>circUNC13C</i> | miR-519-3p                                                       | 1 |
| <i>circUNC13C</i> | miR-5190                                                         | 1 |
| <i>circUNC13C</i> | miR-5192                                                         | 1 |
| <i>circUNC13C</i> | miR-5194                                                         | 1 |
| <i>circUNC13C</i> | miR-5195-5p                                                      | 1 |
| <i>circUNC13C</i> | miR-5196-3p                                                      | 2 |
| <i>circUNC13C</i> | miR-5197-3p                                                      | 3 |
| <i>circUNC13C</i> | miR-520g-3p                                                      | 2 |
| <i>circUNC13C</i> | miR-525-5p                                                       | 3 |
| <i>circUNC13C</i> | miR-526b-5p                                                      | 7 |
| <i>circUNC13C</i> | miR-532-3p                                                       | 1 |
| <i>circUNC13C</i> | miR-532-5p                                                       | 1 |
| <i>circUNC13C</i> | miR-539-3p                                                       | 2 |
| <i>circUNC13C</i> | miR-539-5p                                                       | 1 |
| <i>circUNC13C</i> | miR-543                                                          | 1 |
| <i>circUNC13C</i> | miR-544a                                                         | 2 |
| <i>circUNC13C</i> | miR-545-3p                                                       | 2 |
| <i>circUNC13C</i> | miR-545-5p                                                       | 1 |
| <i>circUNC13C</i> | miR-548ac/548bb-3p/548d-3p/548h-3p/548z                          | 2 |
| <i>circUNC13C</i> | miR-548ah-5p/3609                                                | 2 |
| <i>circUNC13C</i> | miR-548ai/548ag/548ba/570-5p                                     | 1 |
| <i>circUNC13C</i> | miR-548ao-5p/548ax                                               | 2 |
| <i>circUNC13C</i> | miR-548ap-3p/548aa/548t-3p                                       | 2 |
| <i>circUNC13C</i> | miR-548aq-3p/548am-3p/548aj-3p/548ah23p/548ae-3p/548j-3p/548x-3p | 2 |
| <i>circUNC13C</i> | miR-548as-3p                                                     | 2 |
| <i>circUNC13C</i> | miR-548at-5p                                                     | 2 |
| <i>circUNC13C</i> | miR-548au-3p                                                     | 4 |
| <i>circUNC13C</i> | miR-548av-3p                                                     | 1 |
| <i>circUNC13C</i> | miR-548av-5p/548k/8054                                           | 1 |
| <i>circUNC13C</i> | miR-548aw                                                        | 1 |



|                   |                                                                  |   |
|-------------------|------------------------------------------------------------------|---|
| <i>circUNC13C</i> | miR-548ay-3p/548at-3p                                            | 2 |
| <i>circUNC13C</i> | miR-548ay-5p/548au-5p/548as-5p/548ar-5p/548aq-5p/548ap-5p/548am- |   |
| <i>circUNC13C</i> | miR-548az-3p/548ar-3p/548a-3p/548e-3p/548f-3p                    |   |
| <i>circUNC13C</i> | miR-548az-5p/548t-5p                                             | 1 |
| <i>circUNC13C</i> | miR-548c-3p                                                      | 4 |
| <i>circUNC13C</i> | miR-548g-3p                                                      | 1 |
| <i>circUNC13C</i> | miR-548l                                                         | 1 |
| <i>circUNC13C</i> | miR-548m                                                         | 2 |
| <i>circUNC13C</i> | miR-548n                                                         | 1 |
| <i>circUNC13C</i> | miR-548p                                                         | 2 |
| <i>circUNC13C</i> | miR-548q                                                         | 1 |
| <i>circUNC13C</i> | miR-548s                                                         | 2 |
| <i>circUNC13C</i> | miR-548u/7161-5p                                                 | 2 |
| <i>circUNC13C</i> | miR-549a                                                         | 2 |
| <i>circUNC13C</i> | miR-550a-3-5p/550a-5p/1271-3p                                    | 1 |
| <i>circUNC13C</i> | miR-550b-2-5p                                                    | 1 |
| <i>circUNC13C</i> | miR-550b-3p                                                      | 1 |
| <i>circUNC13C</i> | miR-551b-5p                                                      | 3 |
| <i>circUNC13C</i> | miR-554                                                          | 1 |
| <i>circUNC13C</i> | miR-5571-5p                                                      | 2 |
| <i>circUNC13C</i> | miR-5572                                                         | 1 |
| <i>circUNC13C</i> | miR-5579-5p                                                      | 1 |
| <i>circUNC13C</i> | miR-558                                                          | 2 |
| <i>circUNC13C</i> | miR-5580-3p                                                      | 1 |
| <i>circUNC13C</i> | miR-5581-3p                                                      | 3 |
| <i>circUNC13C</i> | miR-5582-3p                                                      | 2 |
| <i>circUNC13C</i> | miR-5584-3p                                                      | 3 |
| <i>circUNC13C</i> | miR-5584-5p                                                      | 1 |
| <i>circUNC13C</i> | miR-5585-5p                                                      | 2 |
| <i>circUNC13C</i> | miR-5587-5p                                                      | 3 |
| <i>circUNC13C</i> | miR-5590-5p                                                      | 4 |
| <i>circUNC13C</i> | miR-5591-3p                                                      | 2 |
| <i>circUNC13C</i> | miR-561-3p                                                       | 2 |
| <i>circUNC13C</i> | miR-5681a                                                        | 2 |
| <i>circUNC13C</i> | miR-5682                                                         | 1 |
| <i>circUNC13C</i> | miR-5691                                                         | 1 |
| <i>circUNC13C</i> | miR-5693                                                         | 3 |
| <i>circUNC13C</i> | miR-5694                                                         | 2 |

|                   |                  |   |
|-------------------|------------------|---|
| <i>circUNC13C</i> | miR-5696         | 4 |
| <i>circUNC13C</i> | miR-5697         | 2 |
| <i>circUNC13C</i> | miR-570-3p       | 1 |
| <i>circUNC13C</i> | miR-5700         | 1 |
| <i>circUNC13C</i> | miR-5701         | 1 |
| <i>circUNC13C</i> | miR-5702         | 2 |
| <i>circUNC13C</i> | miR-5704         | 2 |
| <i>circUNC13C</i> | miR-5705         | 2 |
| <i>circUNC13C</i> | miR-573/3616-5p  | 2 |
| <i>circUNC13C</i> | miR-574-3p       | 1 |
| <i>circUNC13C</i> | miR-575/4676-5p  | 2 |
| <i>circUNC13C</i> | miR-576-5p       | 1 |
| <i>circUNC13C</i> | miR-577          | 1 |
| <i>circUNC13C</i> | miR-578          | 3 |
| <i>circUNC13C</i> | miR-579-3p       | 4 |
| <i>circUNC13C</i> | miR-580-3p       | 1 |
| <i>circUNC13C</i> | miR-580-5p       | 1 |
| <i>circUNC13C</i> | miR-581          | 2 |
| <i>circUNC13C</i> | miR-582-5p       | 1 |
| <i>circUNC13C</i> | miR-583          | 2 |
| <i>circUNC13C</i> | miR-584-3p       | 2 |
| <i>circUNC13C</i> | miR-585-5p       | 1 |
| <i>circUNC13C</i> | miR-587          | 8 |
| <i>circUNC13C</i> | miR-588          | 2 |
| <i>circUNC13C</i> | miR-589-3p       | 1 |
| <i>circUNC13C</i> | miR-590-3p       | 3 |
| <i>circUNC13C</i> | miR-591          | 1 |
| <i>circUNC13C</i> | miR-592          | 2 |
| <i>circUNC13C</i> | miR-593-3p       | 2 |
| <i>circUNC13C</i> | miR-595          | 2 |
| <i>circUNC13C</i> | miR-597-3p       | 1 |
| <i>circUNC13C</i> | miR-599          | 2 |
| <i>circUNC13C</i> | miR-603          | 1 |
| <i>circUNC13C</i> | miR-604          | 1 |
| <i>circUNC13C</i> | miR-607          | 3 |
| <i>circUNC13C</i> | miR-6071         | 4 |
| <i>circUNC13C</i> | miR-6072/6891-3p | 5 |
| <i>circUNC13C</i> | miR-6074         | 1 |

|                   |                    |   |
|-------------------|--------------------|---|
| <i>circUNC13C</i> | miR-6079           | 2 |
| <i>circUNC13C</i> | miR-6080           | 1 |
| <i>circUNC13C</i> | miR-6083           | 1 |
| <i>circUNC13C</i> | miR-6124           | 2 |
| <i>circUNC13C</i> | miR-6131           | 1 |
| <i>circUNC13C</i> | miR-6134           | 1 |
| <i>circUNC13C</i> | miR-617            | 2 |
| <i>circUNC13C</i> | miR-618            | 5 |
| <i>circUNC13C</i> | miR-619-5p/6506-5p | 2 |
| <i>circUNC13C</i> | miR-622            | 2 |
| <i>circUNC13C</i> | miR-623            | 3 |
| <i>circUNC13C</i> | miR-625-5p         | 1 |
| <i>circUNC13C</i> | miR-627-3p         | 2 |
| <i>circUNC13C</i> | miR-627-5p         | 2 |
| <i>circUNC13C</i> | miR-628-5p         | 1 |
| <i>circUNC13C</i> | miR-629-5p         | 3 |
| <i>circUNC13C</i> | miR-630            | 1 |
| <i>circUNC13C</i> | miR-632/4288       | 1 |
| <i>circUNC13C</i> | miR-633            | 2 |
| <i>circUNC13C</i> | miR-635/6774-5p    | 1 |
| <i>circUNC13C</i> | miR-636            | 5 |
| <i>circUNC13C</i> | miR-639            | 1 |
| <i>circUNC13C</i> | miR-640            | 1 |
| <i>circUNC13C</i> | miR-641/3617-5p    | 2 |
| <i>circUNC13C</i> | miR-642-3p         | 2 |
| <i>circUNC13C</i> | miR-642a-5p        | 1 |
| <i>circUNC13C</i> | miR-644a           | 2 |
| <i>circUNC13C</i> | miR-647            | 1 |
| <i>circUNC13C</i> | miR-648            | 1 |
| <i>circUNC13C</i> | miR-6499-3p        | 3 |
| <i>circUNC13C</i> | miR-6501-3p        | 1 |
| <i>circUNC13C</i> | miR-6505-3p        | 2 |
| <i>circUNC13C</i> | miR-6507-3p        | 1 |
| <i>circUNC13C</i> | miR-6507-5p        | 2 |
| <i>circUNC13C</i> | miR-6509-3p        | 2 |
| <i>circUNC13C</i> | miR-6513-3p        | 1 |
| <i>circUNC13C</i> | miR-6513-5p        | 2 |
| <i>circUNC13C</i> | miR-6514-3p        | 2 |

|                   |                             |   |
|-------------------|-----------------------------|---|
| <i>circUNC13C</i> | miR-6514-5p                 | 4 |
| <i>circUNC13C</i> | miR-6515-3p                 | 2 |
| <i>circUNC13C</i> | miR-6516-3p                 | 2 |
| <i>circUNC13C</i> | miR-6516-5p                 | 3 |
| <i>circUNC13C</i> | miR-652-5p                  | 1 |
| <i>circUNC13C</i> | miR-653-3p                  | 4 |
| <i>circUNC13C</i> | miR-654-3p                  | 2 |
| <i>circUNC13C</i> | miR-654-5p                  | 1 |
| <i>circUNC13C</i> | miR-659-3p                  | 2 |
| <i>circUNC13C</i> | miR-660-5p                  | 2 |
| <i>circUNC13C</i> | miR-661                     | 1 |
| <i>circUNC13C</i> | miR-664a-5p/4794            | 2 |
| <i>circUNC13C</i> | miR-670-3p                  | 3 |
| <i>circUNC13C</i> | miR-670-5p                  | 2 |
| <i>circUNC13C</i> | miR-671-5p                  | 3 |
| <i>circUNC13C</i> | miR-6715a-3p                | 1 |
| <i>circUNC13C</i> | miR-6719-3p                 | 1 |
| <i>circUNC13C</i> | miR-6720-5p                 | 1 |
| <i>circUNC13C</i> | miR-6721-5p                 | 1 |
| <i>circUNC13C</i> | miR-6723-5p                 | 1 |
| <i>circUNC13C</i> | miR-6728-3p                 | 4 |
| <i>circUNC13C</i> | miR-6730-3p                 | 1 |
| <i>circUNC13C</i> | miR-6730-5p                 | 2 |
| <i>circUNC13C</i> | miR-6732-3p                 | 3 |
| <i>circUNC13C</i> | miR-6733-3p                 | 1 |
| <i>circUNC13C</i> | miR-6734-3p                 | 3 |
| <i>circUNC13C</i> | miR-6734-5p                 | 1 |
| <i>circUNC13C</i> | miR-6736-3p                 | 1 |
| <i>circUNC13C</i> | miR-6737-5p/6812-5p/6819-5p | 1 |
| <i>circUNC13C</i> | miR-6738-3p                 | 2 |
| <i>circUNC13C</i> | miR-6739-3p                 | 4 |
| <i>circUNC13C</i> | miR-6740-3p                 | 1 |
| <i>circUNC13C</i> | miR-6740-5p                 | 1 |
| <i>circUNC13C</i> | miR-6741-5p                 | 2 |
| <i>circUNC13C</i> | miR-6742-3p                 | 1 |
| <i>circUNC13C</i> | miR-6742-5p                 | 3 |
| <i>circUNC13C</i> | miR-6744-5p                 | 2 |
| <i>circUNC13C</i> | miR-6750-5p/6822-5p         | 1 |

|                   |                       |   |
|-------------------|-----------------------|---|
| <i>circUNC13C</i> | miR-6751-5p/6803-5p   | 1 |
| <i>circUNC13C</i> | miR-6753-3p/7107-3p   | 1 |
| <i>circUNC13C</i> | miR-6756-5p/6766-5p   | 2 |
| <i>circUNC13C</i> | miR-6757-3p           | 1 |
| <i>circUNC13C</i> | miR-6758-3p           | 4 |
| <i>circUNC13C</i> | miR-6758-5p/6856-5p   | 4 |
| <i>circUNC13C</i> | miR-6759-5p           | 1 |
| <i>circUNC13C</i> | miR-676-3p            | 2 |
| <i>circUNC13C</i> | miR-676-5p            | 3 |
| <i>circUNC13C</i> | miR-6760-3p           | 6 |
| <i>circUNC13C</i> | miR-6761-5p           | 1 |
| <i>circUNC13C</i> | miR-6762-3p           | 1 |
| <i>circUNC13C</i> | miR-6763-3p           | 1 |
| <i>circUNC13C</i> | miR-6764-3p/6824-3p   | 2 |
| <i>circUNC13C</i> | miR-6769a-5p/6769b-5p | 1 |
| <i>circUNC13C</i> | miR-6770-5p           | 1 |
| <i>circUNC13C</i> | miR-6771-3p           | 2 |
| <i>circUNC13C</i> | miR-6773-3p           | 2 |
| <i>circUNC13C</i> | miR-6776-5p           | 1 |
| <i>circUNC13C</i> | miR-6777-3p           | 1 |
| <i>circUNC13C</i> | miR-6779-3p           | 2 |
| <i>circUNC13C</i> | miR-6780a-3p          | 4 |
| <i>circUNC13C</i> | miR-6780b-3p          | 1 |
| <i>circUNC13C</i> | miR-6782-5p           | 1 |
| <i>circUNC13C</i> | miR-6787-3p           | 1 |
| <i>circUNC13C</i> | miR-6794-3p           | 1 |
| <i>circUNC13C</i> | miR-6795-3p           | 1 |
| <i>circUNC13C</i> | miR-6796-3p           | 3 |
| <i>circUNC13C</i> | miR-6796-5p           | 1 |
| <i>circUNC13C</i> | miR-6799-5p           | 1 |
| <i>circUNC13C</i> | miR-6801-5p           | 1 |
| <i>circUNC13C</i> | miR-6803-3p           | 1 |
| <i>circUNC13C</i> | miR-6804-5p           | 1 |
| <i>circUNC13C</i> | miR-6806-5p           | 1 |
| <i>circUNC13C</i> | miR-6809-3p           | 5 |
| <i>circUNC13C</i> | miR-6810-5p           | 1 |
| <i>circUNC13C</i> | miR-6811-3p           | 1 |
| <i>circUNC13C</i> | miR-6814-5p           | 1 |

|                   |                     |   |
|-------------------|---------------------|---|
| <i>circUNC13C</i> | miR-6816-3p         | 2 |
| <i>circUNC13C</i> | miR-6817-3p         | 2 |
| <i>circUNC13C</i> | miR-6818-3p         | 1 |
| <i>circUNC13C</i> | miR-6818-5p         | 4 |
| <i>circUNC13C</i> | miR-6822-3p         | 1 |
| <i>circUNC13C</i> | miR-6823-5p         | 1 |
| <i>circUNC13C</i> | miR-6826-5p         | 1 |
| <i>circUNC13C</i> | miR-6827-5p         | 1 |
| <i>circUNC13C</i> | miR-6828-3p         | 4 |
| <i>circUNC13C</i> | miR-6828-5p         | 3 |
| <i>circUNC13C</i> | miR-6830-3p         | 2 |
| <i>circUNC13C</i> | miR-6830-5p         | 1 |
| <i>circUNC13C</i> | miR-6831-3p         | 1 |
| <i>circUNC13C</i> | miR-6832-3p         | 3 |
| <i>circUNC13C</i> | miR-6832-5p         | 1 |
| <i>circUNC13C</i> | miR-6834-3p         | 1 |
| <i>circUNC13C</i> | miR-6834-5p         | 1 |
| <i>circUNC13C</i> | miR-6837-3p         | 1 |
| <i>circUNC13C</i> | miR-6838-3p         | 1 |
| <i>circUNC13C</i> | miR-6839-3p         | 2 |
| <i>circUNC13C</i> | miR-6840-3p         | 1 |
| <i>circUNC13C</i> | miR-6841-3p         | 2 |
| <i>circUNC13C</i> | miR-6842-3p         | 1 |
| <i>circUNC13C</i> | miR-6843-3p/6848-3p | 1 |
| <i>circUNC13C</i> | miR-6844            | 5 |
| <i>circUNC13C</i> | miR-6847-3p         | 1 |
| <i>circUNC13C</i> | miR-6847-5p         | 2 |
| <i>circUNC13C</i> | miR-6849-3p         | 1 |
| <i>circUNC13C</i> | miR-6851-3p         | 1 |
| <i>circUNC13C</i> | miR-6852-5p         | 1 |
| <i>circUNC13C</i> | miR-6853-3p         | 3 |
| <i>circUNC13C</i> | miR-6854-5p         | 1 |
| <i>circUNC13C</i> | miR-6857-3p         | 1 |
| <i>circUNC13C</i> | miR-6857-5p         | 1 |
| <i>circUNC13C</i> | miR-6858-3p         | 2 |
| <i>circUNC13C</i> | miR-6861-5p         | 1 |
| <i>circUNC13C</i> | miR-6867-3p         | 1 |
| <i>circUNC13C</i> | miR-6867-5p         | 2 |

|                   |             |   |
|-------------------|-------------|---|
| <i>circUNC13C</i> | miR-6868-3p | 2 |
| <i>circUNC13C</i> | miR-6868-5p | 2 |
| <i>circUNC13C</i> | miR-6869-5p | 2 |
| <i>circUNC13C</i> | miR-6870-3p | 3 |
| <i>circUNC13C</i> | miR-6872-3p | 2 |
| <i>circUNC13C</i> | miR-6873-3p | 1 |
| <i>circUNC13C</i> | miR-6873-5p | 2 |
| <i>circUNC13C</i> | miR-6875-3p | 2 |
| <i>circUNC13C</i> | miR-6878-3p | 2 |
| <i>circUNC13C</i> | miR-6880-5p | 1 |
| <i>circUNC13C</i> | miR-6881-3p | 4 |
| <i>circUNC13C</i> | miR-6882-3p | 1 |
| <i>circUNC13C</i> | miR-6882-5p | 1 |
| <i>circUNC13C</i> | miR-6884-3p | 1 |
| <i>circUNC13C</i> | miR-6885-3p | 2 |
| <i>circUNC13C</i> | miR-6886-3p | 2 |
| <i>circUNC13C</i> | miR-6887-3p | 1 |
| <i>circUNC13C</i> | miR-6888-3p | 1 |
| <i>circUNC13C</i> | miR-6888-5p | 3 |
| <i>circUNC13C</i> | miR-6889-3p | 2 |
| <i>circUNC13C</i> | miR-6890-3p | 1 |
| <i>circUNC13C</i> | miR-6892-3p | 2 |
| <i>circUNC13C</i> | miR-6892-5p | 1 |
| <i>circUNC13C</i> | miR-6894-3p | 2 |
| <i>circUNC13C</i> | miR-6894-5p | 2 |
| <i>circUNC13C</i> | miR-6895-3p | 2 |
| <i>circUNC13C</i> | miR-7106-3p | 4 |
| <i>circUNC13C</i> | miR-7106-5p | 1 |
| <i>circUNC13C</i> | miR-7108-5p | 1 |
| <i>circUNC13C</i> | miR-7109-3p | 1 |
| <i>circUNC13C</i> | miR-7109-5p | 1 |
| <i>circUNC13C</i> | miR-7110-3p | 2 |
| <i>circUNC13C</i> | miR-7111-3p | 4 |
| <i>circUNC13C</i> | miR-7113-3p | 1 |
| <i>circUNC13C</i> | miR-7113-5p | 2 |
| <i>circUNC13C</i> | miR-7114-5p | 3 |
| <i>circUNC13C</i> | miR-7152-3p | 1 |
| <i>circUNC13C</i> | miR-7152-5p | 2 |

|                   |             |   |
|-------------------|-------------|---|
| <i>circUNC13C</i> | miR-7153-3p | 2 |
| <i>circUNC13C</i> | miR-7154-3p | 2 |
| <i>circUNC13C</i> | miR-7154-5p | 1 |
| <i>circUNC13C</i> | miR-7156-3p | 1 |
| <i>circUNC13C</i> | miR-7158-3p | 1 |
| <i>circUNC13C</i> | miR-7158-5p | 1 |
| <i>circUNC13C</i> | miR-7159-3p | 1 |
| <i>circUNC13C</i> | miR-7159-5p | 2 |
| <i>circUNC13C</i> | miR-7160-5p | 1 |
| <i>circUNC13C</i> | miR-7161-3p | 3 |
| <i>circUNC13C</i> | miR-7162-3p | 2 |
| <i>circUNC13C</i> | miR-744-3p  | 2 |
| <i>circUNC13C</i> | miR-758-3p  | 2 |
| <i>circUNC13C</i> | miR-759     | 1 |
| <i>circUNC13C</i> | miR-760     | 1 |
| <i>circUNC13C</i> | miR-7641    | 1 |
| <i>circUNC13C</i> | miR-765     | 2 |
| <i>circUNC13C</i> | miR-766-3p  | 3 |
| <i>circUNC13C</i> | miR-766-5p  | 2 |
| <i>circUNC13C</i> | miR-767-3p  | 1 |
| <i>circUNC13C</i> | miR-7705    | 3 |
| <i>circUNC13C</i> | miR-7843-3p | 1 |
| <i>circUNC13C</i> | miR-7848-3p | 1 |
| <i>circUNC13C</i> | miR-7849-3p | 2 |
| <i>circUNC13C</i> | miR-7850-5p | 2 |
| <i>circUNC13C</i> | miR-7852-3p | 2 |
| <i>circUNC13C</i> | miR-7854-3p | 1 |
| <i>circUNC13C</i> | miR-7855-5p | 1 |
| <i>circUNC13C</i> | miR-7856-5p | 3 |
| <i>circUNC13C</i> | miR-7974    | 1 |
| <i>circUNC13C</i> | miR-7977    | 1 |
| <i>circUNC13C</i> | miR-7978    | 1 |
| <i>circUNC13C</i> | miR-802     | 1 |
| <i>circUNC13C</i> | miR-8055    | 2 |
| <i>circUNC13C</i> | miR-8056    | 3 |
| <i>circUNC13C</i> | miR-8057    | 2 |
| <i>circUNC13C</i> | miR-8064    | 1 |
| <i>circUNC13C</i> | miR-8065    | 1 |



|                   |              |   |
|-------------------|--------------|---|
| <i>circUNC13C</i> | miR-8068     | 3 |
| <i>circUNC13C</i> | miR-8069     | 1 |
| <i>circUNC13C</i> | miR-8070     | 2 |
| <i>circUNC13C</i> | miR-8071     | 1 |
| <i>circUNC13C</i> | miR-8075     | 2 |
| <i>circUNC13C</i> | miR-8077     | 1 |
| <i>circUNC13C</i> | miR-8080     | 2 |
| <i>circUNC13C</i> | miR-8081     | 2 |
| <i>circUNC13C</i> | miR-8083     | 1 |
| <i>circUNC13C</i> | miR-8084     | 1 |
| <i>circUNC13C</i> | miR-8087     | 3 |
| <i>circUNC13C</i> | miR-8088     | 1 |
| <i>circUNC13C</i> | miR-8485     | 1 |
| <i>circUNC13C</i> | miR-873-3p   | 1 |
| <i>circUNC13C</i> | miR-873-5p.1 | 2 |
| <i>circUNC13C</i> | miR-874-3p   | 3 |
| <i>circUNC13C</i> | miR-876-5p   | 3 |
| <i>circUNC13C</i> | miR-877-3p   | 1 |
| <i>circUNC13C</i> | miR-885-5p   | 3 |
| <i>circUNC13C</i> | miR-887-5p   | 2 |
| <i>circUNC13C</i> | miR-888-3p   | 1 |
| <i>circUNC13C</i> | miR-889-3p   | 1 |
| <i>circUNC13C</i> | miR-890      | 1 |
| <i>circUNC13C</i> | miR-891a-3p  | 5 |
| <i>circUNC13C</i> | miR-891b     | 2 |
| <i>circUNC13C</i> | miR-892-5p   | 1 |
| <i>circUNC13C</i> | miR-892a     | 4 |
| <i>circUNC13C</i> | miR-892b     | 1 |
| <i>circUNC13C</i> | miR-9-3p     | 2 |
| <i>circUNC13C</i> | miR-9-5p     | 5 |
| <i>circUNC13C</i> | miR-921      | 1 |
| <i>circUNC13C</i> | miR-922      | 1 |
| <i>circUNC13C</i> | miR-924      | 1 |
| <i>circUNC13C</i> | miR-92a-2-5p | 1 |
| <i>circUNC13C</i> | miR-93-3p    | 4 |
| <i>circUNC13C</i> | miR-933      | 1 |
| <i>circUNC13C</i> | miR-935      | 1 |
| <i>circUNC13C</i> | miR-937-5p   | 2 |

|                   |                           |   |
|-------------------|---------------------------|---|
| <i>circUNC13C</i> | miR-938                   | 2 |
| <i>circUNC13C</i> | miR-939-3p                | 1 |
| <i>circUNC13C</i> | miR-942-5p                | 5 |
| <i>circUNC13C</i> | miR-943                   | 1 |
| <i>circUNC13C</i> | miR-9500                  | 1 |
| <i>circUNC13C</i> | miR-96-3p                 | 3 |
| <i>circUNC13C</i> | miR-96-5p/1271-5p         | 1 |
| <i>circUNC13C</i> | miR-99-3p                 | 3 |
| <i>circUNC13C</i> | miR-101-3p.1              | 1 |
| <i>circUNC13C</i> | miR-1180-3p               | 1 |
| <i>circUNC13C</i> | miR-1200                  | 1 |
| <i>circUNC13C</i> | miR-1204                  | 1 |
| <i>circUNC13C</i> | miR-1233-3p               | 1 |
| <i>circUNC13C</i> | miR-1233-5p/6778-5p       | 1 |
| <i>circUNC13C</i> | miR-124-5p                | 1 |
| <i>circUNC13C</i> | miR-126-5p                | 1 |
| <i>circUNC13C</i> | miR-132-3p/212-3p         | 2 |
| <i>circUNC13C</i> | miR-1324                  | 2 |
| <i>circUNC13C</i> | miR-142-5p                | 2 |
| <i>circUNC13C</i> | miR-144-3p                | 1 |
| <i>circUNC13C</i> | miR-197-3p                | 1 |
| <i>circUNC13C</i> | miR-197-5p/3132           | 1 |
| <i>circUNC13C</i> | miR-198                   | 2 |
| <i>circUNC13C</i> | miR-199-3p                | 3 |
| <i>circUNC13C</i> | miR-205-5p                | 2 |
| <i>circUNC13C</i> | miR-2276-3p               | 2 |
| <i>circUNC13C</i> | miR-28-5p/708-5p          | 1 |
| <i>circUNC13C</i> | miR-2909                  | 1 |
| <i>circUNC13C</i> | miR-3117-5p               | 2 |
| <i>circUNC13C</i> | miR-3145-5p               | 2 |
| <i>circUNC13C</i> | miR-3162-5p               | 1 |
| <i>circUNC13C</i> | miR-3189-5p               | 1 |
| <i>circUNC13C</i> | miR-338-5p                | 1 |
| <i>circUNC13C</i> | miR-3650                  | 1 |
| <i>circUNC13C</i> | miR-3665                  | 1 |
| <i>circUNC13C</i> | miR-3677-3p               | 1 |
| <i>circUNC13C</i> | miR-371-5p                | 2 |
| <i>circUNC13C</i> | miR-371b-5p/373-5p/616-5p | 2 |

|                   |                       |   |
|-------------------|-----------------------|---|
| <i>circUNC13C</i> | miR-372-5p            | 2 |
| <i>circUNC13C</i> | miR-376c-3p           | 1 |
| <i>circUNC13C</i> | miR-377-3p            | 1 |
| <i>circUNC13C</i> | miR-378a-5p           | 1 |
| <i>circUNC13C</i> | miR-379-5p            | 2 |
| <i>circUNC13C</i> | miR-383-5p.1          | 1 |
| <i>circUNC13C</i> | miR-3917              | 1 |
| <i>circUNC13C</i> | miR-4270/4441/6754-5p | 2 |
| <i>circUNC13C</i> | miR-4286              | 1 |
| <i>circUNC13C</i> | miR-4304              | 1 |
| <i>circUNC13C</i> | miR-4423-3p           | 1 |
| <i>circUNC13C</i> | miR-4451              | 2 |
| <i>circUNC13C</i> | miR-4454              | 1 |
| <i>circUNC13C</i> | miR-4455              | 1 |
| <i>circUNC13C</i> | miR-4470              | 1 |
| <i>circUNC13C</i> | miR-4497              | 1 |
| <i>circUNC13C</i> | miR-450b-3p/769-3p    | 1 |
| <i>circUNC13C</i> | miR-4536-3p           | 1 |
| <i>circUNC13C</i> | miR-4648              | 1 |
| <i>circUNC13C</i> | miR-4650-3p           | 2 |
| <i>circUNC13C</i> | miR-4654/4769-5p      | 1 |
| <i>circUNC13C</i> | miR-4664-3p           | 1 |
| <i>circUNC13C</i> | miR-4690-5p           | 1 |
| <i>circUNC13C</i> | miR-4693-3p           | 1 |
| <i>circUNC13C</i> | miR-4698              | 1 |
| <i>circUNC13C</i> | miR-4739              | 1 |
| <i>circUNC13C</i> | miR-4758-3p           | 1 |
| <i>circUNC13C</i> | miR-4761-5p           | 3 |
| <i>circUNC13C</i> | miR-4763-5p           | 1 |
| <i>circUNC13C</i> | miR-4772-3p           | 2 |
| <i>circUNC13C</i> | miR-4772-5p           | 1 |
| <i>circUNC13C</i> | miR-483-3p.2          | 2 |
| <i>circUNC13C</i> | miR-504-3p            | 1 |
| <i>circUNC13C</i> | miR-508-5p            | 2 |
| <i>circUNC13C</i> | miR-5088-3p           | 1 |
| <i>circUNC13C</i> | miR-5089-5p           | 1 |
| <i>circUNC13C</i> | miR-5094              | 1 |
| <i>circUNC13C</i> | miR-5187-5p           | 2 |

|                   |                          |   |
|-------------------|--------------------------|---|
| <i>circUNC13C</i> | miR-541-5p               | 1 |
| <i>circUNC13C</i> | miR-5699-5p              | 1 |
| <i>circUNC13C</i> | miR-6068                 | 1 |
| <i>circUNC13C</i> | miR-609                  | 1 |
| <i>circUNC13C</i> | miR-6165                 | 1 |
| <i>circUNC13C</i> | miR-626/6876-3p          | 2 |
| <i>circUNC13C</i> | miR-6510-5p              | 1 |
| <i>circUNC13C</i> | miR-657                  | 1 |
| <i>circUNC13C</i> | miR-6728-5p              | 1 |
| <i>circUNC13C</i> | miR-6731-5p/8085         | 1 |
| <i>circUNC13C</i> | miR-6748-5p              | 1 |
| <i>circUNC13C</i> | miR-6755-5p              | 1 |
| <i>circUNC13C</i> | miR-6757-5p              | 1 |
| <i>circUNC13C</i> | miR-6760-5p              | 1 |
| <i>circUNC13C</i> | miR-6772-5p              | 1 |
| <i>circUNC13C</i> | miR-6790-3p              | 1 |
| <i>circUNC13C</i> | miR-6793-5p              | 1 |
| <i>circUNC13C</i> | miR-6800-5p              | 1 |
| <i>circUNC13C</i> | miR-6802-5p              | 1 |
| <i>circUNC13C</i> | miR-6815-5p/6865-5p      | 2 |
| <i>circUNC13C</i> | miR-6821-3p              | 1 |
| <i>circUNC13C</i> | miR-6841-5p              | 1 |
| <i>circUNC13C</i> | miR-6854-3p              | 1 |
| <i>circUNC13C</i> | miR-6863                 | 1 |
| <i>circUNC13C</i> | miR-6878-5p              | 1 |
| <i>circUNC13C</i> | miR-7112-5p              | 1 |
| <i>circUNC13C</i> | miR-8063                 | 1 |
| <i>circUNC13C</i> | miR-885-3p               | 1 |
| <i>circUNC13C</i> | miR-936                  | 3 |
| <i>circUNC13C</i> | miR-101-5p               | 1 |
| <i>circUNC13C</i> | miR-103-3p/107           | 2 |
| <i>circUNC13C</i> | miR-10b-3p               | 1 |
| <i>circUNC13C</i> | miR-1197                 | 1 |
| <i>circUNC13C</i> | miR-1207-5p/4763-3p      | 1 |
| <i>circUNC13C</i> | miR-1237-3p              | 1 |
| <i>circUNC13C</i> | miR-1237-5p/4488/4697-5p | 1 |
| <i>circUNC13C</i> | miR-124-3p.1             | 1 |
| <i>circUNC13C</i> | miR-124-3p.2/506-3p      | 1 |

|                   |                                      |   |
|-------------------|--------------------------------------|---|
| <i>circUNC13C</i> | miR-1244                             | 2 |
| <i>circUNC13C</i> | miR-1245a/8079                       | 1 |
| <i>circUNC13C</i> | miR-1248                             | 1 |
| <i>circUNC13C</i> | miR-1257                             | 1 |
| <i>circUNC13C</i> | miR-1273f                            | 1 |
| <i>circUNC13C</i> | miR-1283                             | 2 |
| <i>circUNC13C</i> | miR-1286                             | 1 |
| <i>circUNC13C</i> | miR-1295b-5p/1912                    | 2 |
| <i>circUNC13C</i> | miR-1301-5p/6502-5p                  | 1 |
| <i>circUNC13C</i> | miR-1304-3p                          | 1 |
| <i>circUNC13C</i> | miR-135-5p                           | 2 |
| <i>circUNC13C</i> | miR-137                              | 1 |
| <i>circUNC13C</i> | miR-138-2-3p                         | 1 |
| <i>circUNC13C</i> | miR-142-3p.1                         | 2 |
| <i>circUNC13C</i> | miR-143-3p                           | 1 |
| <i>circUNC13C</i> | miR-145-5p                           | 2 |
| <i>circUNC13C</i> | miR-146b-3p                          | 1 |
| <i>circUNC13C</i> | miR-15-5p/16-5p/195-5p/424-5p/497-5p | 2 |
| <i>circUNC13C</i> | miR-1827                             | 3 |
| <i>circUNC13C</i> | miR-183-3p                           | 1 |
| <i>circUNC13C</i> | miR-183-5p.1                         | 2 |
| <i>circUNC13C</i> | miR-190-5p                           | 2 |
| <i>circUNC13C</i> | miR-1909-3p/6722-3p                  | 1 |
| <i>circUNC13C</i> | miR-1910-3p/6511a-5p                 | 4 |
| <i>circUNC13C</i> | miR-1910-5p                          | 1 |
| <i>circUNC13C</i> | miR-1911-3p                          | 2 |
| <i>circUNC13C</i> | miR-193a-5p                          | 2 |
| <i>circUNC13C</i> | miR-203a-3p.1                        | 1 |
| <i>circUNC13C</i> | miR-203b-5p/6718-5p                  | 1 |
| <i>circUNC13C</i> | miR-2053                             | 1 |
| <i>circUNC13C</i> | miR-208-5p                           | 1 |
| <i>circUNC13C</i> | miR-216b-3p                          | 1 |
| <i>circUNC13C</i> | miR-219a-1-3p                        | 1 |
| <i>circUNC13C</i> | miR-221-3p/222-3p                    | 1 |
| <i>circUNC13C</i> | miR-23-5p                            | 1 |
| <i>circUNC13C</i> | miR-2355-3p                          | 1 |
| <i>circUNC13C</i> | miR-27-3p                            | 1 |
| <i>circUNC13C</i> | miR-27a-5p                           | 2 |

|                   |                     |   |
|-------------------|---------------------|---|
| <i>circUNC13C</i> | miR-297             | 2 |
| <i>circUNC13C</i> | miR-298             | 3 |
| <i>circUNC13C</i> | miR-299-3p          | 1 |
| <i>circUNC13C</i> | miR-302c-5p         | 1 |
| <i>circUNC13C</i> | miR-3064-3p         | 1 |
| <i>circUNC13C</i> | miR-3065-3p         | 1 |
| <i>circUNC13C</i> | miR-3065-5p         | 1 |
| <i>circUNC13C</i> | miR-31-3p           | 2 |
| <i>circUNC13C</i> | miR-31-5p           | 2 |
| <i>circUNC13C</i> | miR-3120-5p         | 1 |
| <i>circUNC13C</i> | miR-3123            | 1 |
| <i>circUNC13C</i> | miR-3127-3p/6756-3p | 1 |
| <i>circUNC13C</i> | miR-3130-5p/4482-5p | 2 |
| <i>circUNC13C</i> | miR-3162-3p         | 1 |
| <i>circUNC13C</i> | miR-3163            | 1 |
| <i>circUNC13C</i> | miR-3171            | 1 |
| <i>circUNC13C</i> | miR-3173-5p         | 1 |
| <i>circUNC13C</i> | miR-3179            | 1 |
| <i>circUNC13C</i> | miR-3180-5p         | 2 |
| <i>circUNC13C</i> | miR-3190-3p         | 2 |
| <i>circUNC13C</i> | miR-3197            | 1 |
| <i>circUNC13C</i> | miR-3201/4791       | 1 |
| <i>circUNC13C</i> | miR-323a-5p         | 4 |
| <i>circUNC13C</i> | miR-323b-3p         | 1 |
| <i>circUNC13C</i> | miR-328-3p          | 1 |
| <i>circUNC13C</i> | miR-328-5p/6885-5p  | 1 |
| <i>circUNC13C</i> | miR-335-5p          | 4 |
| <i>circUNC13C</i> | miR-342-3p          | 1 |
| <i>circUNC13C</i> | miR-34b-5p/449c-5p  | 4 |
| <i>circUNC13C</i> | miR-3529-3p         | 1 |
| <i>circUNC13C</i> | miR-3591-5p         | 1 |
| <i>circUNC13C</i> | miR-3611            | 2 |
| <i>circUNC13C</i> | miR-3612            | 3 |
| <i>circUNC13C</i> | miR-3613-5p         | 1 |
| <i>circUNC13C</i> | miR-3621            | 1 |
| <i>circUNC13C</i> | miR-3656            | 1 |
| <i>circUNC13C</i> | miR-3667-5p         | 1 |
| <i>circUNC13C</i> | miR-3677-5p         | 2 |

|                   |                                   |   |
|-------------------|-----------------------------------|---|
| <i>circUNC13C</i> | miR-3680-5p                       | 1 |
| <i>circUNC13C</i> | miR-3688-3p                       | 2 |
| <i>circUNC13C</i> | miR-3689a-5p/3689b-5p/3689e/3689f | 1 |
| <i>circUNC13C</i> | miR-3689d/6851-5p                 | 1 |
| <i>circUNC13C</i> | miR-3714                          | 1 |
| <i>circUNC13C</i> | miR-376-3p                        | 2 |
| <i>circUNC13C</i> | miR-376a-2-5p                     | 1 |
| <i>circUNC13C</i> | miR-376a-5p                       | 1 |
| <i>circUNC13C</i> | miR-378j/6839-5p                  | 1 |
| <i>circUNC13C</i> | miR-383-3p                        | 1 |
| <i>circUNC13C</i> | miR-3910                          | 1 |
| <i>circUNC13C</i> | miR-3912-3p                       | 2 |
| <i>circUNC13C</i> | miR-3924                          | 2 |
| <i>circUNC13C</i> | miR-3925-5p                       | 1 |
| <i>circUNC13C</i> | miR-3936                          | 1 |
| <i>circUNC13C</i> | miR-411-3p                        | 2 |
| <i>circUNC13C</i> | miR-4259                          | 1 |
| <i>circUNC13C</i> | miR-4261                          | 3 |
| <i>circUNC13C</i> | miR-4269/6715b-5p                 | 1 |
| <i>circUNC13C</i> | miR-4279                          | 1 |
| <i>circUNC13C</i> | miR-4283                          | 2 |
| <i>circUNC13C</i> | miR-4320                          | 2 |
| <i>circUNC13C</i> | miR-4421/5699-3p                  | 1 |
| <i>circUNC13C</i> | miR-4433a-5p                      | 1 |
| <i>circUNC13C</i> | miR-4433b-5p                      | 1 |
| <i>circUNC13C</i> | miR-4438                          | 1 |
| <i>circUNC13C</i> | miR-4443                          | 5 |
| <i>circUNC13C</i> | miR-4452                          | 1 |
| <i>circUNC13C</i> | miR-4460                          | 2 |
| <i>circUNC13C</i> | miR-4473                          | 1 |
| <i>circUNC13C</i> | miR-4484                          | 1 |
| <i>circUNC13C</i> | miR-4489                          | 2 |
| <i>circUNC13C</i> | miR-4491/4657                     | 1 |
| <i>circUNC13C</i> | miR-4496                          | 3 |
| <i>circUNC13C</i> | miR-4508                          | 1 |
| <i>circUNC13C</i> | miR-4514/4692                     | 1 |
| <i>circUNC13C</i> | miR-4517                          | 1 |
| <i>circUNC13C</i> | miR-455-3p.1                      | 1 |

|                   |                  |   |
|-------------------|------------------|---|
| <i>circUNC13C</i> | miR-4645-5p/4673 | 2 |
| <i>circUNC13C</i> | miR-4646-3p      | 1 |
| <i>circUNC13C</i> | miR-4655-5p      | 1 |
| <i>circUNC13C</i> | miR-4660         | 2 |
| <i>circUNC13C</i> | miR-4671-3p      | 1 |
| <i>circUNC13C</i> | miR-4688/6743-5p | 1 |
| <i>circUNC13C</i> | miR-4693-5p      | 1 |
| <i>circUNC13C</i> | miR-4694-3p      | 1 |
| <i>circUNC13C</i> | miR-4695-5p      | 1 |
| <i>circUNC13C</i> | miR-4696         | 3 |
| <i>circUNC13C</i> | miR-4708-5p      | 1 |
| <i>circUNC13C</i> | miR-4709-5p      | 1 |
| <i>circUNC13C</i> | miR-4711-5p      | 1 |
| <i>circUNC13C</i> | miR-4712-3p      | 1 |
| <i>circUNC13C</i> | miR-4715-3p      | 1 |
| <i>circUNC13C</i> | miR-4715-5p      | 1 |
| <i>circUNC13C</i> | miR-4717-3p      | 1 |
| <i>circUNC13C</i> | miR-4722-5p      | 1 |
| <i>circUNC13C</i> | miR-4727-3p      | 2 |
| <i>circUNC13C</i> | miR-4731-5p      | 1 |
| <i>circUNC13C</i> | miR-4733-5p      | 1 |
| <i>circUNC13C</i> | miR-4736         | 1 |
| <i>circUNC13C</i> | miR-4738-3p      | 2 |
| <i>circUNC13C</i> | miR-4742-3p      | 1 |
| <i>circUNC13C</i> | miR-4742-5p      | 1 |
| <i>circUNC13C</i> | miR-4752         | 2 |
| <i>circUNC13C</i> | miR-4753-5p      | 1 |
| <i>circUNC13C</i> | miR-4757-3p      | 1 |
| <i>circUNC13C</i> | miR-4760-5p/8061 | 1 |
| <i>circUNC13C</i> | miR-4776-3p      | 1 |
| <i>circUNC13C</i> | miR-4779         | 1 |
| <i>circUNC13C</i> | miR-4781-5p      | 1 |
| <i>circUNC13C</i> | miR-4787-5p      | 1 |
| <i>circUNC13C</i> | miR-4790-3p      | 1 |
| <i>circUNC13C</i> | miR-4790-5p      | 1 |
| <i>circUNC13C</i> | miR-4795-5p      | 1 |
| <i>circUNC13C</i> | miR-4796-3p      | 2 |
| <i>circUNC13C</i> | miR-4798-3p      | 1 |



|                   |                     |   |
|-------------------|---------------------|---|
| <i>circUNC13C</i> | miR-486-5p          | 1 |
| <i>circUNC13C</i> | miR-487-3p          | 1 |
| <i>circUNC13C</i> | miR-490-3p          | 1 |
| <i>circUNC13C</i> | miR-494-3p          | 2 |
| <i>circUNC13C</i> | miR-495-3p          | 1 |
| <i>circUNC13C</i> | miR-5003-5p         | 1 |
| <i>circUNC13C</i> | miR-5008-5p         | 1 |
| <i>circUNC13C</i> | miR-500a-5p         | 1 |
| <i>circUNC13C</i> | miR-500b-3p         | 2 |
| <i>circUNC13C</i> | miR-503-5p          | 2 |
| <i>circUNC13C</i> | miR-505-3p.1        | 1 |
| <i>circUNC13C</i> | miR-5090/6775-5p    | 1 |
| <i>circUNC13C</i> | miR-5093            | 1 |
| <i>circUNC13C</i> | miR-513a-5p         | 1 |
| <i>circUNC13C</i> | miR-513c-5p/514b-5p | 2 |
| <i>circUNC13C</i> | miR-514a-3p         | 1 |
| <i>circUNC13C</i> | miR-5197-5p         | 1 |
| <i>circUNC13C</i> | miR-520f-5p         | 1 |
| <i>circUNC13C</i> | miR-522-3p          | 1 |
| <i>circUNC13C</i> | miR-542-5p          | 1 |
| <i>circUNC13C</i> | miR-548a1/4445-3p   | 1 |
| <i>circUNC13C</i> | miR-548an           | 1 |
| <i>circUNC13C</i> | miR-548ao-3p        | 1 |
| <i>circUNC13C</i> | miR-548e-5p         | 3 |
| <i>circUNC13C</i> | miR-548v            | 1 |
| <i>circUNC13C</i> | miR-552-3p          | 1 |
| <i>circUNC13C</i> | miR-5579-3p         | 1 |
| <i>circUNC13C</i> | miR-5583-3p         | 1 |
| <i>circUNC13C</i> | miR-5585-3p         | 2 |
| <i>circUNC13C</i> | miR-5586-5p         | 1 |
| <i>circUNC13C</i> | miR-5589-3p         | 1 |
| <i>circUNC13C</i> | miR-5589-5p         | 1 |
| <i>circUNC13C</i> | miR-561-5p          | 1 |
| <i>circUNC13C</i> | miR-562             | 1 |
| <i>circUNC13C</i> | miR-567             | 2 |
| <i>circUNC13C</i> | miR-568             | 1 |
| <i>circUNC13C</i> | miR-5683            | 2 |
| <i>circUNC13C</i> | miR-5692a           | 1 |

|                   |                  |   |
|-------------------|------------------|---|
| <i>circUNC13C</i> | miR-571          | 1 |
| <i>circUNC13C</i> | miR-582-3p       | 1 |
| <i>circUNC13C</i> | miR-584-5p       | 1 |
| <i>circUNC13C</i> | miR-6069         | 1 |
| <i>circUNC13C</i> | miR-6073         | 2 |
| <i>circUNC13C</i> | miR-6081         | 1 |
| <i>circUNC13C</i> | miR-6085/6813-5p | 1 |
| <i>circUNC13C</i> | miR-6087         | 1 |
| <i>circUNC13C</i> | miR-6089         | 1 |
| <i>circUNC13C</i> | miR-6125         | 1 |
| <i>circUNC13C</i> | miR-6126         | 2 |
| <i>circUNC13C</i> | miR-6132/6836-5p | 1 |
| <i>circUNC13C</i> | miR-615-5p       | 1 |
| <i>circUNC13C</i> | miR-616-3p       | 1 |
| <i>circUNC13C</i> | miR-629-3p       | 2 |
| <i>circUNC13C</i> | miR-643          | 1 |
| <i>circUNC13C</i> | miR-646          | 2 |
| <i>circUNC13C</i> | miR-649          | 1 |
| <i>circUNC13C</i> | miR-6502-3p      | 1 |
| <i>circUNC13C</i> | miR-6511-3p      | 1 |
| <i>circUNC13C</i> | miR-6511-5p      | 1 |
| <i>circUNC13C</i> | miR-6512-5p      | 1 |
| <i>circUNC13C</i> | miR-6515-5p      | 5 |
| <i>circUNC13C</i> | miR-653-5p       | 1 |
| <i>circUNC13C</i> | miR-656-3p       | 1 |
| <i>circUNC13C</i> | miR-663b         | 1 |
| <i>circUNC13C</i> | miR-664a-3p      | 1 |
| <i>circUNC13C</i> | miR-665          | 2 |
| <i>circUNC13C</i> | miR-6716-5p      | 1 |
| <i>circUNC13C</i> | miR-6727-5p      | 1 |
| <i>circUNC13C</i> | miR-6729-3p      | 2 |
| <i>circUNC13C</i> | miR-6748-3p      | 1 |
| <i>circUNC13C</i> | miR-675-3p       | 2 |
| <i>circUNC13C</i> | miR-6753-5p      | 2 |
| <i>circUNC13C</i> | miR-6755-3p      | 1 |
| <i>circUNC13C</i> | miR-6765-5p      | 2 |
| <i>circUNC13C</i> | miR-6768-3p      | 1 |
| <i>circUNC13C</i> | miR-6768-5p      | 1 |

|                   |                         |   |
|-------------------|-------------------------|---|
| <i>circUNC13C</i> | miR-6782-3p             | 1 |
| <i>circUNC13C</i> | miR-6784-3p/6862-3p     | 1 |
| <i>circUNC13C</i> | miR-6784-5p             | 1 |
| <i>circUNC13C</i> | miR-6795-5p/6887-5p     | 1 |
| <i>circUNC13C</i> | miR-6798-5p             | 1 |
| <i>circUNC13C</i> | miR-6802-3p             | 2 |
| <i>circUNC13C</i> | miR-6809-5p             | 2 |
| <i>circUNC13C</i> | miR-6815-3p             | 1 |
| <i>circUNC13C</i> | miR-6826-3p             | 1 |
| <i>circUNC13C</i> | miR-6833-5p             | 2 |
| <i>circUNC13C</i> | miR-6836-3p             | 1 |
| <i>circUNC13C</i> | miR-6846-5p/6848-5p     | 1 |
| <i>circUNC13C</i> | miR-6864-5p             | 2 |
| <i>circUNC13C</i> | miR-6874-5p             | 1 |
| <i>circUNC13C</i> | miR-6883-3p             | 2 |
| <i>circUNC13C</i> | miR-7112-3p             | 1 |
| <i>circUNC13C</i> | miR-7150                | 5 |
| <i>circUNC13C</i> | miR-7151-5p             | 1 |
| <i>circUNC13C</i> | miR-7515                | 1 |
| <i>circUNC13C</i> | miR-764                 | 1 |
| <i>circUNC13C</i> | miR-7704                | 1 |
| <i>circUNC13C</i> | miR-7706                | 1 |
| <i>circUNC13C</i> | miR-7845-5p             | 1 |
| <i>circUNC13C</i> | miR-7847-3p             | 1 |
| <i>circUNC13C</i> | miR-7976                | 1 |
| <i>circUNC13C</i> | miR-8060                | 2 |
| <i>circUNC13C</i> | miR-8062                | 1 |
| <i>circUNC13C</i> | miR-8074                | 2 |
| <i>circUNC13C</i> | miR-8076                | 2 |
| <i>circUNC13C</i> | miR-8086                | 1 |
| <i>circUNC13C</i> | miR-873-5p.2            | 1 |
| <i>circUNC13C</i> | miR-874-5p              | 1 |
| <i>circUNC13C</i> | miR-875-3p              | 1 |
| <i>circUNC13C</i> | miR-876-3p              | 4 |
| <i>circUNC13C</i> | miR-887-3p              | 1 |
| <i>circUNC13C</i> | miR-888-5p              | 1 |
| <i>circUNC13C</i> | miR-889-5p              | 2 |
| <i>circUNC13C</i> | miR-940/6808-5p/6893-5p | 4 |

|                 |                     |   |
|-----------------|---------------------|---|
| <i>circURI1</i> | miR-1-3p/206        | 3 |
| <i>circURI1</i> | miR-101-3p.1        | 4 |
| <i>circURI1</i> | miR-103-3p/107      | 3 |
| <i>circURI1</i> | miR-103a-2-5p       | 4 |
| <i>circURI1</i> | miR-105-5p          | 2 |
| <i>circURI1</i> | miR-106a-3p         | 5 |
| <i>circURI1</i> | miR-10a-3p          | 5 |
| <i>circURI1</i> | miR-1178-3p         | 1 |
| <i>circURI1</i> | miR-1180-3p         | 1 |
| <i>circURI1</i> | miR-1184            | 3 |
| <i>circURI1</i> | miR-1185-5p         | 1 |
| <i>circURI1</i> | miR-1199-5p/6751-3p | 1 |
| <i>circURI1</i> | miR-1200            | 1 |
| <i>circURI1</i> | miR-1202/3972       | 1 |
| <i>circURI1</i> | miR-1205            | 3 |
| <i>circURI1</i> | miR-1207-3p         | 2 |
| <i>circURI1</i> | miR-1208            | 2 |
| <i>circURI1</i> | miR-1229-3p         | 2 |
| <i>circURI1</i> | miR-1231            | 1 |
| <i>circURI1</i> | miR-1233-3p         | 1 |
| <i>circURI1</i> | miR-1236-3p         | 3 |
| <i>circURI1</i> | miR-1238-3p         | 3 |
| <i>circURI1</i> | miR-124-3p.1        | 2 |
| <i>circURI1</i> | miR-124-5p          | 5 |
| <i>circURI1</i> | miR-1243            | 2 |
| <i>circURI1</i> | miR-1245b-3p        | 1 |
| <i>circURI1</i> | miR-1246            | 1 |
| <i>circURI1</i> | miR-1250-3p         | 1 |
| <i>circURI1</i> | miR-1250-5p         | 1 |
| <i>circURI1</i> | miR-1251-3p         | 1 |
| <i>circURI1</i> | miR-1251-5p         | 1 |
| <i>circURI1</i> | miR-1255b-2-3p      | 2 |
| <i>circURI1</i> | miR-1256            | 1 |
| <i>circURI1</i> | miR-1257            | 2 |
| <i>circURI1</i> | miR-125a-3p         | 2 |
| <i>circURI1</i> | miR-1263            | 2 |
| <i>circURI1</i> | miR-1265            | 2 |
| <i>circURI1</i> | miR-1266-5p/4518    | 2 |

|                 |                                      |   |
|-----------------|--------------------------------------|---|
| <i>circURI1</i> | miR-1272                             | 1 |
| <i>circURI1</i> | miR-1273g-3p                         | 3 |
| <i>circURI1</i> | miR-1273g-5p                         | 2 |
| <i>circURI1</i> | miR-1277-5p                          | 2 |
| <i>circURI1</i> | miR-1279                             | 1 |
| <i>circURI1</i> | miR-128-3p                           | 2 |
| <i>circURI1</i> | miR-1282                             | 1 |
| <i>circURI1</i> | miR-1288-5p                          | 1 |
| <i>circURI1</i> | miR-129-5p                           | 3 |
| <i>circURI1</i> | miR-1290                             | 3 |
| <i>circURI1</i> | miR-1295b-5p/1912                    | 1 |
| <i>circURI1</i> | miR-1299                             | 2 |
| <i>circURI1</i> | miR-1301-3p                          | 2 |
| <i>circURI1</i> | miR-1304-3p                          | 2 |
| <i>circURI1</i> | miR-132-3p/212-3p                    | 7 |
| <i>circURI1</i> | miR-1322                             | 1 |
| <i>circURI1</i> | miR-1323                             | 1 |
| <i>circURI1</i> | miR-134-5p                           | 2 |
| <i>circURI1</i> | miR-1343-3p                          | 3 |
| <i>circURI1</i> | miR-136-3p                           | 2 |
| <i>circURI1</i> | miR-136-5p                           | 2 |
| <i>circURI1</i> | miR-139-5p                           | 1 |
| <i>circURI1</i> | miR-140-3p.1                         | 1 |
| <i>circURI1</i> | miR-140-3p.2                         | 1 |
| <i>circURI1</i> | miR-140-5p                           | 2 |
| <i>circURI1</i> | miR-141-5p                           | 4 |
| <i>circURI1</i> | miR-142-3p.2                         | 1 |
| <i>circURI1</i> | miR-144-3p                           | 4 |
| <i>circURI1</i> | miR-145-3p                           | 3 |
| <i>circURI1</i> | miR-145-5p                           | 1 |
| <i>circURI1</i> | miR-1468-3p                          | 4 |
| <i>circURI1</i> | miR-146a-3p                          | 3 |
| <i>circURI1</i> | miR-148-3p/152-3p                    | 1 |
| <i>circURI1</i> | miR-148a-5p                          | 1 |
| <i>circURI1</i> | miR-148b-5p/6874-3p                  | 3 |
| <i>circURI1</i> | miR-15-5p/16-5p/195-5p/424-5p/497-5p | 1 |
| <i>circURI1</i> | miR-150-3p                           | 2 |
| <i>circURI1</i> | miR-152-5p                           | 2 |

|                 |                                     |   |
|-----------------|-------------------------------------|---|
| <i>circURI1</i> | miR-153-5p                          | 4 |
| <i>circURI1</i> | miR-155-3p                          | 1 |
| <i>circURI1</i> | miR-16-1-3p                         | 5 |
| <i>circURI1</i> | miR-16-2-3p/195-3p                  | 5 |
| <i>circURI1</i> | miR-17-3p                           | 3 |
| <i>circURI1</i> | miR-17-5p/20-5p/93-5p/106-5p/519-3p | 2 |
| <i>circURI1</i> | miR-18-5p                           | 1 |
| <i>circURI1</i> | miR-181-3p/4420                     | 9 |
| <i>circURI1</i> | miR-182-3p                          | 4 |
| <i>circURI1</i> | miR-1825                            | 1 |
| <i>circURI1</i> | miR-183-3p                          | 3 |
| <i>circURI1</i> | miR-183-5p.2                        | 1 |
| <i>circURI1</i> | miR-185-3p                          | 3 |
| <i>circURI1</i> | miR-186-3p                          | 2 |
| <i>circURI1</i> | miR-186-5p                          | 1 |
| <i>circURI1</i> | miR-19-5p                           | 3 |
| <i>circURI1</i> | miR-197-3p                          | 3 |
| <i>circURI1</i> | miR-1976                            | 1 |
| <i>circURI1</i> | miR-199-5p                          | 1 |
| <i>circURI1</i> | miR-202-5p                          | 1 |
| <i>circURI1</i> | miR-203a-5p                         | 2 |
| <i>circURI1</i> | miR-203b-3p                         | 2 |
| <i>circURI1</i> | miR-203b-5p/6718-5p                 | 1 |
| <i>circURI1</i> | miR-205-3p                          | 2 |
| <i>circURI1</i> | miR-2052                            | 3 |
| <i>circURI1</i> | miR-2053                            | 1 |
| <i>circURI1</i> | miR-208-3p                          | 1 |
| <i>circURI1</i> | miR-211-3p                          | 1 |
| <i>circURI1</i> | miR-2113                            | 1 |
| <i>circURI1</i> | miR-2115-3p                         | 1 |
| <i>circURI1</i> | miR-2116-5p                         | 5 |
| <i>circURI1</i> | miR-2117                            | 1 |
| <i>circURI1</i> | miR-212-5p                          | 2 |
| <i>circURI1</i> | miR-214-3p/3619-5p                  | 1 |
| <i>circURI1</i> | miR-217                             | 2 |
| <i>circURI1</i> | miR-218-1-3p                        | 4 |
| <i>circURI1</i> | miR-218-2-3p                        | 4 |
| <i>circURI1</i> | miR-219b-5p                         | 1 |

|                 |                       |   |
|-----------------|-----------------------|---|
| <i>circURI1</i> | miR-22-5p             | 5 |
| <i>circURI1</i> | miR-221-3p/222-3p     | 1 |
| <i>circURI1</i> | miR-221-5p/8073       | 2 |
| <i>circURI1</i> | miR-222-5p            | 1 |
| <i>circURI1</i> | miR-224-5p            | 4 |
| <i>circURI1</i> | miR-2276-3p           | 3 |
| <i>circURI1</i> | miR-2276-5p           | 2 |
| <i>circURI1</i> | miR-23-3p             | 5 |
| <i>circURI1</i> | miR-23-5p             | 2 |
| <i>circURI1</i> | miR-2355-3p           | 2 |
| <i>circURI1</i> | miR-24-3p             | 2 |
| <i>circURI1</i> | miR-2467-3p           | 1 |
| <i>circURI1</i> | miR-26-3p             | 3 |
| <i>circURI1</i> | miR-26-5p             | 2 |
| <i>circURI1</i> | miR-2681-5p           | 1 |
| <i>circURI1</i> | miR-26b-3p            | 1 |
| <i>circURI1</i> | miR-27-3p             | 1 |
| <i>circURI1</i> | miR-27a-5p            | 1 |
| <i>circURI1</i> | miR-299-5p            | 3 |
| <i>circURI1</i> | miR-29a-5p            | 3 |
| <i>circURI1</i> | miR-29b-2-5p          | 3 |
| <i>circURI1</i> | miR-302b-5p/302d-5p   | 1 |
| <i>circURI1</i> | miR-302c-3p.2/520-3p  | 1 |
| <i>circURI1</i> | miR-3065-3p           | 1 |
| <i>circURI1</i> | miR-3065-5p           | 3 |
| <i>circURI1</i> | miR-3074-3p           | 3 |
| <i>circURI1</i> | miR-3074-5p           | 3 |
| <i>circURI1</i> | miR-31-3p             | 1 |
| <i>circURI1</i> | miR-31-5p             | 1 |
| <i>circURI1</i> | miR-3120-5p           | 1 |
| <i>circURI1</i> | miR-3124-3p           | 2 |
| <i>circURI1</i> | miR-3125/3916/6859-5p | 1 |
| <i>circURI1</i> | miR-3126-5p           | 1 |
| <i>circURI1</i> | miR-3128              | 3 |
| <i>circURI1</i> | miR-3129-3p/5583-5p   | 1 |
| <i>circURI1</i> | miR-3130-5p/4482-5p   | 1 |
| <i>circURI1</i> | miR-3133              | 1 |
| <i>circURI1</i> | miR-3134              | 2 |

|                 |                     |   |
|-----------------|---------------------|---|
| <i>circURI1</i> | miR-3146            | 1 |
| <i>circURI1</i> | miR-3150b-3p        | 1 |
| <i>circURI1</i> | miR-3152-3p         | 3 |
| <i>circURI1</i> | miR-3158-3p         | 1 |
| <i>circURI1</i> | miR-3158-5p         | 3 |
| <i>circURI1</i> | miR-3160-5p         | 1 |
| <i>circURI1</i> | miR-3161            | 2 |
| <i>circURI1</i> | miR-3164            | 2 |
| <i>circURI1</i> | miR-3168            | 3 |
| <i>circURI1</i> | miR-3173-3p/6891-5p | 2 |
| <i>circURI1</i> | miR-3179            | 3 |
| <i>circURI1</i> | miR-3180-5p         | 1 |
| <i>circURI1</i> | miR-3182            | 2 |
| <i>circURI1</i> | miR-3186-5p         | 1 |
| <i>circURI1</i> | miR-3187-3p         | 1 |
| <i>circURI1</i> | miR-3189-3p         | 2 |
| <i>circURI1</i> | miR-3194-3p         | 2 |
| <i>circURI1</i> | miR-32-3p           | 1 |
| <i>circURI1</i> | miR-3200-5p         | 3 |
| <i>circURI1</i> | miR-3202            | 1 |
| <i>circURI1</i> | miR-326             | 2 |
| <i>circURI1</i> | miR-329-3p/362-3p   | 2 |
| <i>circURI1</i> | miR-335-3p          | 3 |
| <i>circURI1</i> | miR-337-5p          | 1 |
| <i>circURI1</i> | miR-338-3p          | 1 |
| <i>circURI1</i> | miR-338-5p          | 2 |
| <i>circURI1</i> | miR-33a-3p          | 2 |
| <i>circURI1</i> | miR-346             | 1 |
| <i>circURI1</i> | miR-34a-3p          | 2 |
| <i>circURI1</i> | miR-34b-3p          | 4 |
| <i>circURI1</i> | miR-34c-3p          | 4 |
| <i>circURI1</i> | miR-3529-3p         | 3 |
| <i>circURI1</i> | miR-3605-5p         | 1 |
| <i>circURI1</i> | miR-3607-3p         | 1 |
| <i>circURI1</i> | miR-361-3p          | 3 |
| <i>circURI1</i> | miR-361-5p          | 5 |
| <i>circURI1</i> | miR-3611            | 4 |
| <i>circURI1</i> | miR-3613-3p         | 3 |



|                 |                           |   |
|-----------------|---------------------------|---|
| <i>circURI1</i> | miR-3614-5p               | 2 |
| <i>circURI1</i> | miR-3617-3p               | 2 |
| <i>circURI1</i> | miR-362-5p/500b-5p        | 4 |
| <i>circURI1</i> | miR-3620-3p               | 1 |
| <i>circURI1</i> | miR-3622a-3p/3622b-3p     | 2 |
| <i>circURI1</i> | miR-3622a-5p              | 1 |
| <i>circURI1</i> | miR-3622b-5p              | 2 |
| <i>circURI1</i> | miR-3653-3p               | 2 |
| <i>circURI1</i> | miR-3653-5p               | 1 |
| <i>circURI1</i> | miR-3654                  | 2 |
| <i>circURI1</i> | miR-3662                  | 2 |
| <i>circURI1</i> | miR-3663-3p               | 2 |
| <i>circURI1</i> | miR-3664-3p               | 2 |
| <i>circURI1</i> | miR-3664-5p               | 2 |
| <i>circURI1</i> | miR-3665                  | 1 |
| <i>circURI1</i> | miR-3671                  | 1 |
| <i>circURI1</i> | miR-3677-5p               | 4 |
| <i>circURI1</i> | miR-3680-3p               | 7 |
| <i>circURI1</i> | miR-3682-5p               | 1 |
| <i>circURI1</i> | miR-3685                  | 1 |
| <i>circURI1</i> | miR-3686                  | 1 |
| <i>circURI1</i> | miR-3688-5p               | 1 |
| <i>circURI1</i> | miR-370-3p                | 1 |
| <i>circURI1</i> | miR-371-5p                | 1 |
| <i>circURI1</i> | miR-3714                  | 2 |
| <i>circURI1</i> | miR-371b-5p/373-5p/616-5p | 1 |
| <i>circURI1</i> | miR-372-5p                | 1 |
| <i>circURI1</i> | miR-374a-3p               | 5 |
| <i>circURI1</i> | miR-375                   | 1 |
| <i>circURI1</i> | miR-376c-3p               | 1 |
| <i>circURI1</i> | miR-378a-5p               | 1 |
| <i>circURI1</i> | miR-378g                  | 1 |
| <i>circURI1</i> | miR-378j/6839-5p          | 2 |
| <i>circURI1</i> | miR-381-5p                | 1 |
| <i>circURI1</i> | miR-382-3p                | 3 |
| <i>circURI1</i> | miR-383-3p                | 1 |
| <i>circURI1</i> | miR-383-5p.1              | 1 |
| <i>circURI1</i> | miR-383-5p.2              | 1 |

|                 |                   |   |
|-----------------|-------------------|---|
| <i>circURI1</i> | miR-384           | 1 |
| <i>circURI1</i> | miR-3907          | 2 |
| <i>circURI1</i> | miR-3908          | 4 |
| <i>circURI1</i> | miR-3910          | 2 |
| <i>circURI1</i> | miR-3923          | 1 |
| <i>circURI1</i> | miR-3926          | 2 |
| <i>circURI1</i> | miR-3927-5p       | 1 |
| <i>circURI1</i> | miR-3934-5p       | 2 |
| <i>circURI1</i> | miR-3937          | 1 |
| <i>circURI1</i> | miR-3941          | 1 |
| <i>circURI1</i> | miR-3942-3p       | 1 |
| <i>circURI1</i> | miR-3942-5p       | 4 |
| <i>circURI1</i> | miR-3945          | 1 |
| <i>circURI1</i> | miR-3974          | 1 |
| <i>circURI1</i> | miR-3977          | 3 |
| <i>circURI1</i> | miR-409-3p        | 2 |
| <i>circURI1</i> | miR-411-3p        | 4 |
| <i>circURI1</i> | miR-421           | 5 |
| <i>circURI1</i> | miR-4252          | 1 |
| <i>circURI1</i> | miR-4253/6862-5p  | 1 |
| <i>circURI1</i> | miR-4258          | 1 |
| <i>circURI1</i> | miR-4268          | 1 |
| <i>circURI1</i> | miR-4269/6715b-5p | 2 |
| <i>circURI1</i> | miR-4272          | 4 |
| <i>circURI1</i> | miR-4273/7156-5p  | 3 |
| <i>circURI1</i> | miR-4274          | 1 |
| <i>circURI1</i> | miR-4277          | 3 |
| <i>circURI1</i> | miR-4282          | 2 |
| <i>circURI1</i> | miR-4284          | 2 |
| <i>circURI1</i> | miR-4287/4685-3p  | 1 |
| <i>circURI1</i> | miR-4291          | 1 |
| <i>circURI1</i> | miR-4293          | 1 |
| <i>circURI1</i> | miR-4299          | 2 |
| <i>circURI1</i> | miR-4310/7157-5p  | 1 |
| <i>circURI1</i> | miR-4318          | 2 |
| <i>circURI1</i> | miR-432-5p        | 2 |
| <i>circURI1</i> | miR-4320          | 2 |
| <i>circURI1</i> | miR-4326          | 2 |

|                 |                                              |   |
|-----------------|----------------------------------------------|---|
| <i>circURI1</i> | miR-4419a/4510/6127/6129/6130/6133           | 1 |
| <i>circURI1</i> | miR-4421/5699-3p                             | 1 |
| <i>circURI1</i> | miR-4424                                     | 1 |
| <i>circURI1</i> | miR-4426/4647/4662b                          | 1 |
| <i>circURI1</i> | miR-4427                                     | 3 |
| <i>circURI1</i> | miR-4428                                     | 2 |
| <i>circURI1</i> | miR-4433b-3p                                 | 2 |
| <i>circURI1</i> | miR-4433b-5p                                 | 2 |
| <i>circURI1</i> | miR-4434/4516/5703                           | 1 |
| <i>circURI1</i> | miR-4435                                     | 1 |
| <i>circURI1</i> | miR-4436b-3p/4632-5p/6735-5p/6879-5p/7843-5p | 1 |
| <i>circURI1</i> | miR-4438                                     | 1 |
| <i>circURI1</i> | miR-4443                                     | 1 |
| <i>circURI1</i> | miR-4446-3p                                  | 1 |
| <i>circURI1</i> | miR-4448                                     | 1 |
| <i>circURI1</i> | miR-4452                                     | 3 |
| <i>circURI1</i> | miR-4456                                     | 2 |
| <i>circURI1</i> | miR-4461                                     | 1 |
| <i>circURI1</i> | miR-4469                                     | 1 |
| <i>circURI1</i> | miR-4470                                     | 5 |
| <i>circURI1</i> | miR-4475                                     | 1 |
| <i>circURI1</i> | miR-4476/6876-5p                             | 1 |
| <i>circURI1</i> | miR-4481/4745-5p                             | 2 |
| <i>circURI1</i> | miR-4484                                     | 1 |
| <i>circURI1</i> | miR-4485-5p                                  | 1 |
| <i>circURI1</i> | miR-4486                                     | 1 |
| <i>circURI1</i> | miR-4493                                     | 2 |
| <i>circURI1</i> | miR-450-5p                                   | 1 |
| <i>circURI1</i> | miR-4501                                     | 2 |
| <i>circURI1</i> | miR-4502                                     | 1 |
| <i>circURI1</i> | miR-4509                                     | 2 |
| <i>circURI1</i> | miR-450b-5p                                  | 7 |
| <i>circURI1</i> | miR-4511                                     | 2 |
| <i>circURI1</i> | miR-4512                                     | 2 |
| <i>circURI1</i> | miR-4514/4692                                | 2 |
| <i>circURI1</i> | miR-4519                                     | 1 |
| <i>circURI1</i> | miR-452-3p                                   | 2 |
| <i>circURI1</i> | miR-452-5p/892-3p                            | 1 |

|                 |                       |   |
|-----------------|-----------------------|---|
| <i>circURI1</i> | miR-4520-3p           | 2 |
| <i>circURI1</i> | miR-4527/6503-5p      | 1 |
| <i>circURI1</i> | miR-4528              | 2 |
| <i>circURI1</i> | miR-4530              | 1 |
| <i>circURI1</i> | miR-4533              | 1 |
| <i>circURI1</i> | miR-4534/8082         | 2 |
| <i>circURI1</i> | miR-4536-5p           | 3 |
| <i>circURI1</i> | miR-4539              | 4 |
| <i>circURI1</i> | miR-4640-5p           | 2 |
| <i>circURI1</i> | miR-4642              | 2 |
| <i>circURI1</i> | miR-4646-3p           | 2 |
| <i>circURI1</i> | miR-4652-3p           | 2 |
| <i>circURI1</i> | miR-4653-3p           | 1 |
| <i>circURI1</i> | miR-4659a-3p/4659b-3p | 7 |
| <i>circURI1</i> | miR-4660              | 3 |
| <i>circURI1</i> | miR-4663              | 2 |
| <i>circURI1</i> | miR-4664-3p           | 1 |
| <i>circURI1</i> | miR-4666a-5p          | 1 |
| <i>circURI1</i> | miR-4670-3p           | 3 |
| <i>circURI1</i> | miR-4672              | 1 |
| <i>circURI1</i> | miR-4677-3p           | 3 |
| <i>circURI1</i> | miR-4677-5p           | 3 |
| <i>circURI1</i> | miR-4679              | 3 |
| <i>circURI1</i> | miR-4680-3p           | 3 |
| <i>circURI1</i> | miR-4682              | 1 |
| <i>circURI1</i> | miR-4684-5p           | 3 |
| <i>circURI1</i> | miR-4686              | 3 |
| <i>circURI1</i> | miR-4691-5p/6792-3p   | 1 |
| <i>circURI1</i> | miR-4693-3p           | 3 |
| <i>circURI1</i> | miR-4693-5p           | 1 |
| <i>circURI1</i> | miR-4694-3p           | 2 |
| <i>circURI1</i> | miR-4694-5p           | 5 |
| <i>circURI1</i> | miR-4698              | 4 |
| <i>circURI1</i> | miR-4699-5p           | 1 |
| <i>circURI1</i> | miR-4704-5p           | 1 |
| <i>circURI1</i> | miR-4705              | 2 |
| <i>circURI1</i> | miR-4708-3p           | 1 |
| <i>circURI1</i> | miR-4709-5p           | 4 |

|                 |                             |   |
|-----------------|-----------------------------|---|
| <i>circURI1</i> | miR-4711-5p                 | 1 |
| <i>circURI1</i> | miR-4712-3p                 | 2 |
| <i>circURI1</i> | miR-4714-5p                 | 2 |
| <i>circURI1</i> | miR-4717-3p                 | 1 |
| <i>circURI1</i> | miR-4720-5p/4799-3p/5588-5p | 3 |
| <i>circURI1</i> | miR-4724-5p                 | 5 |
| <i>circURI1</i> | miR-4725-5p                 | 1 |
| <i>circURI1</i> | miR-4729                    | 2 |
| <i>circURI1</i> | miR-4737                    | 1 |
| <i>circURI1</i> | miR-4739                    | 1 |
| <i>circURI1</i> | miR-4742-5p                 | 2 |
| <i>circURI1</i> | miR-4743-3p                 | 2 |
| <i>circURI1</i> | miR-4744                    | 2 |
| <i>circURI1</i> | miR-4760-3p                 | 3 |
| <i>circURI1</i> | miR-4761-3p                 | 3 |
| <i>circURI1</i> | miR-4761-5p                 | 1 |
| <i>circURI1</i> | miR-4762-3p                 | 2 |
| <i>circURI1</i> | miR-4762-5p                 | 4 |
| <i>circURI1</i> | miR-4763-5p                 | 1 |
| <i>circURI1</i> | miR-4766-3p                 | 2 |
| <i>circURI1</i> | miR-4768-5p/6833-3p         | 2 |
| <i>circURI1</i> | miR-4769-3p/6817-5p         | 1 |
| <i>circURI1</i> | miR-4772-3p                 | 3 |
| <i>circURI1</i> | miR-4772-5p                 | 1 |
| <i>circURI1</i> | miR-4775                    | 2 |
| <i>circURI1</i> | miR-4777-3p                 | 1 |
| <i>circURI1</i> | miR-4778-3p                 | 4 |
| <i>circURI1</i> | miR-4781-3p                 | 2 |
| <i>circURI1</i> | miR-4782-5p/5706            | 2 |
| <i>circURI1</i> | miR-4790-3p                 | 2 |
| <i>circURI1</i> | miR-4793-5p                 | 2 |
| <i>circURI1</i> | miR-4795-3p                 | 1 |
| <i>circURI1</i> | miR-4796-3p                 | 4 |
| <i>circURI1</i> | miR-4802-5p                 | 1 |
| <i>circURI1</i> | miR-483-3p.1                | 2 |
| <i>circURI1</i> | miR-484/3155                | 2 |
| <i>circURI1</i> | miR-488-5p                  | 1 |
| <i>circURI1</i> | miR-489-5p                  | 1 |

|                 |                             |   |
|-----------------|-----------------------------|---|
| <i>circURI1</i> | miR-495-3p                  | 1 |
| <i>circURI1</i> | miR-496.1                   | 2 |
| <i>circURI1</i> | miR-497-3p                  | 2 |
| <i>circURI1</i> | miR-498                     | 1 |
| <i>circURI1</i> | miR-499a-3p/499b-3p         | 3 |
| <i>circURI1</i> | miR-499a-5p                 | 1 |
| <i>circURI1</i> | miR-5000-5p                 | 3 |
| <i>circURI1</i> | miR-5003-3p                 | 2 |
| <i>circURI1</i> | miR-5003-5p                 | 2 |
| <i>circURI1</i> | miR-5004-3p                 | 2 |
| <i>circURI1</i> | miR-5006-5p                 | 1 |
| <i>circURI1</i> | miR-5007-5p                 | 2 |
| <i>circURI1</i> | miR-5009-3p                 | 2 |
| <i>circURI1</i> | miR-500a-5p                 | 2 |
| <i>circURI1</i> | miR-500b-3p                 | 1 |
| <i>circURI1</i> | miR-501-5p                  | 4 |
| <i>circURI1</i> | miR-5010-3p                 | 1 |
| <i>circURI1</i> | miR-5011-5p                 | 2 |
| <i>circURI1</i> | miR-502-5p                  | 2 |
| <i>circURI1</i> | miR-503-5p                  | 1 |
| <i>circURI1</i> | miR-505-3p.1                | 2 |
| <i>circURI1</i> | miR-505-3p.2                | 5 |
| <i>circURI1</i> | miR-506-5p                  | 1 |
| <i>circURI1</i> | miR-507/557                 | 7 |
| <i>circURI1</i> | miR-5087                    | 3 |
| <i>circURI1</i> | miR-5088-5p                 | 1 |
| <i>circURI1</i> | miR-509-3-5p/509-5p/4418    | 2 |
| <i>circURI1</i> | miR-5094                    | 1 |
| <i>circURI1</i> | miR-5096                    | 4 |
| <i>circURI1</i> | miR-512-3p                  | 1 |
| <i>circURI1</i> | miR-513a-3p/513c-3p/3606-3p | 2 |
| <i>circURI1</i> | miR-513a-5p                 | 1 |
| <i>circURI1</i> | miR-513b-3p                 | 1 |
| <i>circURI1</i> | miR-513b-5p                 | 2 |
| <i>circURI1</i> | miR-514a-5p                 | 2 |
| <i>circURI1</i> | miR-515-5p/519e-5p          | 4 |
| <i>circURI1</i> | miR-516a-5p                 | 2 |
| <i>circURI1</i> | miR-516b-5p                 | 2 |

|                 |                                                                  |   |
|-----------------|------------------------------------------------------------------|---|
| <i>circURI1</i> | miR-517-5p                                                       | 1 |
| <i>circURI1</i> | miR-5187-3p                                                      | 3 |
| <i>circURI1</i> | miR-518a-5p/527                                                  | 3 |
| <i>circURI1</i> | miR-518c-5p                                                      | 2 |
| <i>circURI1</i> | miR-5190                                                         | 2 |
| <i>circURI1</i> | miR-5195-5p                                                      | 2 |
| <i>circURI1</i> | miR-5196-3p                                                      | 2 |
| <i>circURI1</i> | miR-5197-3p                                                      | 2 |
| <i>circURI1</i> | miR-519d-5p                                                      | 2 |
| <i>circURI1</i> | miR-522-3p                                                       | 2 |
| <i>circURI1</i> | miR-539-5p                                                       | 1 |
| <i>circURI1</i> | miR-544a                                                         | 1 |
| <i>circURI1</i> | miR-545-3p                                                       | 5 |
| <i>circURI1</i> | miR-545-5p                                                       | 3 |
| <i>circURI1</i> | miR-548ah-5p/3609                                                | 2 |
| <i>circURI1</i> | miR-548aj-5p/548f-5p/548g-5p/548x-5p                             | 4 |
| <i>circURI1</i> | miR-548an                                                        | 1 |
| <i>circURI1</i> | miR-548at-5p                                                     | 2 |
| <i>circURI1</i> | miR-548av-5p/548k/8054                                           | 1 |
| <i>circURI1</i> | miR-548aw                                                        | 3 |
| <i>circURI1</i> | miR-548ay-5p/548au-5p/548as-5p/548ar-5p/548aq-5p/548ap-5p/548am- |   |
| <i>circURI1</i> | miR-548az-3p/548ar-3p/548a-3p/548e-3p/548f-3p                    |   |
| <i>circURI1</i> | miR-548az-5p/548t-5p                                             | 4 |
| <i>circURI1</i> | miR-548b-3p                                                      | 2 |
| <i>circURI1</i> | miR-548c-3p                                                      | 5 |
| <i>circURI1</i> | miR-548g-3p                                                      | 3 |
| <i>circURI1</i> | miR-548l                                                         | 1 |
| <i>circURI1</i> | miR-548m                                                         | 1 |
| <i>circURI1</i> | miR-548n                                                         | 4 |
| <i>circURI1</i> | miR-548p                                                         | 3 |
| <i>circURI1</i> | miR-548q                                                         | 2 |
| <i>circURI1</i> | miR-548s                                                         | 1 |
| <i>circURI1</i> | miR-548v                                                         | 1 |
| <i>circURI1</i> | miR-550b-3p                                                      | 2 |
| <i>circURI1</i> | miR-556-5p                                                       | 3 |
| <i>circURI1</i> | miR-5571-5p                                                      | 2 |
| <i>circURI1</i> | miR-5579-5p                                                      | 2 |
| <i>circURI1</i> | miR-5580-3p                                                      | 2 |

|                 |                 |   |
|-----------------|-----------------|---|
| <i>circURI1</i> | miR-5582-3p     | 1 |
| <i>circURI1</i> | miR-5582-5p     | 1 |
| <i>circURI1</i> | miR-5584-3p     | 3 |
| <i>circURI1</i> | miR-5586-3p     | 2 |
| <i>circURI1</i> | miR-5589-3p     | 1 |
| <i>circURI1</i> | miR-561-3p      | 2 |
| <i>circURI1</i> | miR-567         | 4 |
| <i>circURI1</i> | miR-5681b       | 1 |
| <i>circURI1</i> | miR-5690        | 2 |
| <i>circURI1</i> | miR-5691        | 3 |
| <i>circURI1</i> | miR-5692a       | 1 |
| <i>circURI1</i> | miR-5694        | 1 |
| <i>circURI1</i> | miR-5695        | 2 |
| <i>circURI1</i> | miR-5696        | 4 |
| <i>circURI1</i> | miR-5700        | 1 |
| <i>circURI1</i> | miR-5701        | 4 |
| <i>circURI1</i> | miR-5707        | 1 |
| <i>circURI1</i> | miR-573/3616-5p | 3 |
| <i>circURI1</i> | miR-576-3p      | 1 |
| <i>circURI1</i> | miR-578         | 2 |
| <i>circURI1</i> | miR-579-3p      | 4 |
| <i>circURI1</i> | miR-580-5p      | 1 |
| <i>circURI1</i> | miR-581         | 2 |
| <i>circURI1</i> | miR-586         | 2 |
| <i>circURI1</i> | miR-588         | 1 |
| <i>circURI1</i> | miR-590-3p      | 3 |
| <i>circURI1</i> | miR-592         | 1 |
| <i>circURI1</i> | miR-593-3p      | 1 |
| <i>circURI1</i> | miR-596         | 1 |
| <i>circURI1</i> | miR-597-3p      | 2 |
| <i>circURI1</i> | miR-597-5p      | 2 |
| <i>circURI1</i> | miR-599         | 1 |
| <i>circURI1</i> | miR-601         | 1 |
| <i>circURI1</i> | miR-603         | 2 |
| <i>circURI1</i> | miR-605-3p      | 2 |
| <i>circURI1</i> | miR-605-5p      | 2 |
| <i>circURI1</i> | miR-607         | 5 |
| <i>circURI1</i> | miR-6071        | 3 |



|                 |                                      |   |
|-----------------|--------------------------------------|---|
| <i>circURI1</i> | miR-6072/6891-3p                     | 2 |
| <i>circURI1</i> | miR-6074                             | 1 |
| <i>circURI1</i> | miR-6076/6797-3p                     | 2 |
| <i>circURI1</i> | miR-6080                             | 1 |
| <i>circURI1</i> | miR-6083                             | 1 |
| <i>circURI1</i> | miR-612/1285-3p/3187-5p/5189-5p/6860 | 1 |
| <i>circURI1</i> | miR-6126                             | 3 |
| <i>circURI1</i> | miR-6128                             | 2 |
| <i>circURI1</i> | miR-617                              | 3 |
| <i>circURI1</i> | miR-618                              | 2 |
| <i>circURI1</i> | miR-621                              | 2 |
| <i>circURI1</i> | miR-624-3p                           | 2 |
| <i>circURI1</i> | miR-627-3p                           | 2 |
| <i>circURI1</i> | miR-627-5p                           | 1 |
| <i>circURI1</i> | miR-628-5p                           | 2 |
| <i>circURI1</i> | miR-629-3p                           | 3 |
| <i>circURI1</i> | miR-630                              | 1 |
| <i>circURI1</i> | miR-632/4288                         | 1 |
| <i>circURI1</i> | miR-641/3617-5p                      | 1 |
| <i>circURI1</i> | miR-642a-5p                          | 1 |
| <i>circURI1</i> | miR-646                              | 1 |
| <i>circURI1</i> | miR-6500-3p                          | 2 |
| <i>circURI1</i> | miR-6505-3p                          | 3 |
| <i>circURI1</i> | miR-6505-5p                          | 3 |
| <i>circURI1</i> | miR-6506-3p                          | 1 |
| <i>circURI1</i> | miR-6507-5p                          | 1 |
| <i>circURI1</i> | miR-6508-3p                          | 2 |
| <i>circURI1</i> | miR-651-3p                           | 1 |
| <i>circURI1</i> | miR-6511-5p                          | 2 |
| <i>circURI1</i> | miR-6512-5p                          | 3 |
| <i>circURI1</i> | miR-6513-3p                          | 2 |
| <i>circURI1</i> | miR-6514-5p                          | 1 |
| <i>circURI1</i> | miR-6515-3p                          | 3 |
| <i>circURI1</i> | miR-6515-5p                          | 1 |
| <i>circURI1</i> | miR-652-5p                           | 2 |
| <i>circURI1</i> | miR-653-3p                           | 9 |
| <i>circURI1</i> | miR-654-3p                           | 1 |
| <i>circURI1</i> | miR-656-3p                           | 1 |

|                 |                     |   |
|-----------------|---------------------|---|
| <i>circURI1</i> | miR-657             | 1 |
| <i>circURI1</i> | miR-659-3p          | 3 |
| <i>circURI1</i> | miR-663b            | 1 |
| <i>circURI1</i> | miR-665             | 3 |
| <i>circURI1</i> | miR-668-3p          | 2 |
| <i>circURI1</i> | miR-670-3p          | 3 |
| <i>circURI1</i> | miR-6715a-3p        | 2 |
| <i>circURI1</i> | miR-6721-5p         | 1 |
| <i>circURI1</i> | miR-6731-3p         | 3 |
| <i>circURI1</i> | miR-6736-3p         | 1 |
| <i>circURI1</i> | miR-6738-3p         | 1 |
| <i>circURI1</i> | miR-6740-5p         | 4 |
| <i>circURI1</i> | miR-6741-3p         | 1 |
| <i>circURI1</i> | miR-6742-3p         | 1 |
| <i>circURI1</i> | miR-6748-3p         | 1 |
| <i>circURI1</i> | miR-6749-3p         | 1 |
| <i>circURI1</i> | miR-6753-3p/7107-3p | 1 |
| <i>circURI1</i> | miR-6755-3p         | 4 |
| <i>circURI1</i> | miR-6758-3p         | 1 |
| <i>circURI1</i> | miR-676-5p          | 2 |
| <i>circURI1</i> | miR-6760-3p         | 2 |
| <i>circURI1</i> | miR-6760-5p         | 1 |
| <i>circURI1</i> | miR-6763-3p         | 1 |
| <i>circURI1</i> | miR-6764-3p/6824-3p | 2 |
| <i>circURI1</i> | miR-6765-3p         | 2 |
| <i>circURI1</i> | miR-6768-3p         | 1 |
| <i>circURI1</i> | miR-6780a-3p        | 3 |
| <i>circURI1</i> | miR-6785-3p         | 3 |
| <i>circURI1</i> | miR-6792-5p         | 2 |
| <i>circURI1</i> | miR-6802-3p         | 1 |
| <i>circURI1</i> | miR-6809-3p         | 2 |
| <i>circURI1</i> | miR-6809-5p         | 1 |
| <i>circURI1</i> | miR-6815-3p         | 4 |
| <i>circURI1</i> | miR-6817-3p         | 2 |
| <i>circURI1</i> | miR-6818-3p         | 1 |
| <i>circURI1</i> | miR-6819-3p/6877-3p | 2 |
| <i>circURI1</i> | miR-6822-3p         | 2 |
| <i>circURI1</i> | miR-6828-3p         | 3 |

|                 |             |   |
|-----------------|-------------|---|
| <i>circURI1</i> | miR-6830-3p | 1 |
| <i>circURI1</i> | miR-6830-5p | 2 |
| <i>circURI1</i> | miR-6847-3p | 1 |
| <i>circURI1</i> | miR-6852-5p | 1 |
| <i>circURI1</i> | miR-6856-3p | 1 |
| <i>circURI1</i> | miR-6864-5p | 3 |
| <i>circURI1</i> | miR-6868-5p | 3 |
| <i>circURI1</i> | miR-6873-3p | 2 |
| <i>circURI1</i> | miR-6875-3p | 7 |
| <i>circURI1</i> | miR-6881-3p | 3 |
| <i>circURI1</i> | miR-6882-5p | 2 |
| <i>circURI1</i> | miR-6884-3p | 2 |
| <i>circURI1</i> | miR-6885-3p | 2 |
| <i>circURI1</i> | miR-6888-5p | 1 |
| <i>circURI1</i> | miR-6890-3p | 4 |
| <i>circURI1</i> | miR-6892-3p | 2 |
| <i>circURI1</i> | miR-6892-5p | 2 |
| <i>circURI1</i> | miR-6894-5p | 1 |
| <i>circURI1</i> | miR-6895-3p | 1 |
| <i>circURI1</i> | miR-6895-5p | 2 |
| <i>circURI1</i> | miR-7108-3p | 1 |
| <i>circURI1</i> | miR-7109-3p | 2 |
| <i>circURI1</i> | miR-711     | 1 |
| <i>circURI1</i> | miR-7110-3p | 2 |
| <i>circURI1</i> | miR-7111-3p | 3 |
| <i>circURI1</i> | miR-7112-3p | 1 |
| <i>circURI1</i> | miR-7113-3p | 1 |
| <i>circURI1</i> | miR-7114-5p | 2 |
| <i>circURI1</i> | miR-7152-5p | 3 |
| <i>circURI1</i> | miR-7154-3p | 1 |
| <i>circURI1</i> | miR-7156-3p | 2 |
| <i>circURI1</i> | miR-7158-3p | 2 |
| <i>circURI1</i> | miR-7158-5p | 3 |
| <i>circURI1</i> | miR-7159-5p | 5 |
| <i>circURI1</i> | miR-7160-3p | 2 |
| <i>circURI1</i> | miR-7160-5p | 2 |
| <i>circURI1</i> | miR-7515    | 3 |
| <i>circURI1</i> | miR-759     | 1 |

|                  |              |   |
|------------------|--------------|---|
| <i>circURI1</i>  | miR-760      | 2 |
| <i>circURI1</i>  | miR-764      | 1 |
| <i>circURI1</i>  | miR-765      | 1 |
| <i>circURI1</i>  | miR-766-5p   | 1 |
| <i>circURI1</i>  | miR-7845-5p  | 1 |
| <i>circURI1</i>  | miR-7849-3p  | 1 |
| <i>circURI1</i>  | miR-7850-5p  | 3 |
| <i>circURI1</i>  | miR-7856-5p  | 2 |
| <i>circURI1</i>  | miR-7978     | 2 |
| <i>circURI1</i>  | miR-802      | 3 |
| <i>circURI1</i>  | miR-8060     | 2 |
| <i>circURI1</i>  | miR-8063     | 4 |
| <i>circURI1</i>  | miR-8069     | 1 |
| <i>circURI1</i>  | miR-8070     | 1 |
| <i>circURI1</i>  | miR-8075     | 2 |
| <i>circURI1</i>  | miR-8077     | 2 |
| <i>circURI1</i>  | miR-8485     | 2 |
| <i>circURI1</i>  | miR-873-3p   | 1 |
| <i>circURI1</i>  | miR-875-5p   | 1 |
| <i>circURI1</i>  | miR-876-5p   | 3 |
| <i>circURI1</i>  | miR-885-3p   | 1 |
| <i>circURI1</i>  | miR-885-5p   | 1 |
| <i>circURI1</i>  | miR-888-3p   | 2 |
| <i>circURI1</i>  | miR-888-5p   | 1 |
| <i>circURI1</i>  | miR-891a-3p  | 1 |
| <i>circURI1</i>  | miR-892-5p   | 1 |
| <i>circURI1</i>  | miR-892a     | 2 |
| <i>circURI1</i>  | miR-892b     | 1 |
| <i>circURI1</i>  | miR-9-3p     | 2 |
| <i>circURI1</i>  | miR-922      | 1 |
| <i>circURI1</i>  | miR-924      | 3 |
| <i>circURI1</i>  | miR-935      | 2 |
| <i>circURI1</i>  | miR-937-5p   | 1 |
| <i>circURI1</i>  | miR-939-3p   | 1 |
| <i>circURI1</i>  | miR-942-5p   | 2 |
| <i>circURI1</i>  | miR-944      | 2 |
| <i>circUSP54</i> | miR-1-3p/206 | 1 |
| <i>circUSP54</i> | miR-10-5p    | 2 |

|                  |                     |   |
|------------------|---------------------|---|
| <i>circUSP54</i> | miR-100-3p          | 2 |
| <i>circUSP54</i> | miR-101-3p.1        | 2 |
| <i>circUSP54</i> | miR-103-3p/107      | 4 |
| <i>circUSP54</i> | miR-103a-2-5p       | 6 |
| <i>circUSP54</i> | miR-103b            | 2 |
| <i>circUSP54</i> | miR-105-3p          | 2 |
| <i>circUSP54</i> | miR-105-5p          | 6 |
| <i>circUSP54</i> | miR-10b-3p          | 1 |
| <i>circUSP54</i> | miR-1178-3p         | 3 |
| <i>circUSP54</i> | miR-1178-5p         | 2 |
| <i>circUSP54</i> | miR-1180-5p         | 2 |
| <i>circUSP54</i> | miR-1182            | 2 |
| <i>circUSP54</i> | miR-1183            | 2 |
| <i>circUSP54</i> | miR-1184            | 3 |
| <i>circUSP54</i> | miR-1185-5p         | 8 |
| <i>circUSP54</i> | miR-1197            | 5 |
| <i>circUSP54</i> | miR-1205            | 3 |
| <i>circUSP54</i> | miR-1206            | 1 |
| <i>circUSP54</i> | miR-1207-3p         | 5 |
| <i>circUSP54</i> | miR-1208            | 2 |
| <i>circUSP54</i> | miR-1224-3p         | 1 |
| <i>circUSP54</i> | miR-1224-5p         | 2 |
| <i>circUSP54</i> | miR-1225-3p         | 2 |
| <i>circUSP54</i> | miR-1227-5p         | 4 |
| <i>circUSP54</i> | miR-1229-3p         | 3 |
| <i>circUSP54</i> | miR-1233-3p         | 3 |
| <i>circUSP54</i> | miR-1236-3p         | 1 |
| <i>circUSP54</i> | miR-1236-5p         | 4 |
| <i>circUSP54</i> | miR-1237-3p         | 1 |
| <i>circUSP54</i> | miR-1238-3p         | 2 |
| <i>circUSP54</i> | miR-1238-5p/4758-5p | 2 |
| <i>circUSP54</i> | miR-1245b-3p        | 5 |
| <i>circUSP54</i> | miR-1245b-5p        | 2 |
| <i>circUSP54</i> | miR-1246            | 1 |
| <i>circUSP54</i> | miR-1248            | 1 |
| <i>circUSP54</i> | miR-1249-5p/6797-5p | 2 |
| <i>circUSP54</i> | miR-1252-3p         | 1 |
| <i>circUSP54</i> | miR-1252-5p         | 2 |

|                  |                    |   |
|------------------|--------------------|---|
| <i>circUSP54</i> | miR-1253           | 1 |
| <i>circUSP54</i> | miR-1254/3116      | 1 |
| <i>circUSP54</i> | miR-1255a/1255b-5p | 3 |
| <i>circUSP54</i> | miR-1256           | 2 |
| <i>circUSP54</i> | miR-1257           | 2 |
| <i>circUSP54</i> | miR-1258           | 2 |
| <i>circUSP54</i> | miR-125a-3p        | 1 |
| <i>circUSP54</i> | miR-125b-1-3p      | 2 |
| <i>circUSP54</i> | miR-125b-2-3p      | 2 |
| <i>circUSP54</i> | miR-126-5p         | 2 |
| <i>circUSP54</i> | miR-1260a/1260b    | 3 |
| <i>circUSP54</i> | miR-1265           | 4 |
| <i>circUSP54</i> | miR-1266-5p/4518   | 2 |
| <i>circUSP54</i> | miR-1270           | 2 |
| <i>circUSP54</i> | miR-1272           | 3 |
| <i>circUSP54</i> | miR-1273h-3p       | 2 |
| <i>circUSP54</i> | miR-1276           | 4 |
| <i>circUSP54</i> | miR-1277-3p        | 1 |
| <i>circUSP54</i> | miR-128-1-5p       | 1 |
| <i>circUSP54</i> | miR-128-3p         | 2 |
| <i>circUSP54</i> | miR-1283           | 1 |
| <i>circUSP54</i> | miR-1284           | 2 |
| <i>circUSP54</i> | miR-1285-5p        | 1 |
| <i>circUSP54</i> | miR-1286           | 2 |
| <i>circUSP54</i> | miR-1288-5p        | 2 |
| <i>circUSP54</i> | miR-129-3p         | 4 |
| <i>circUSP54</i> | miR-129-5p         | 3 |
| <i>circUSP54</i> | miR-1295b-3p       | 1 |
| <i>circUSP54</i> | miR-1295b-5p/1912  | 4 |
| <i>circUSP54</i> | miR-1298-3p        | 4 |
| <i>circUSP54</i> | miR-1301-3p        | 2 |
| <i>circUSP54</i> | miR-1302/4298      | 4 |
| <i>circUSP54</i> | miR-1303           | 1 |
| <i>circUSP54</i> | miR-1304-3p        | 2 |
| <i>circUSP54</i> | miR-1305           | 1 |
| <i>circUSP54</i> | miR-1306-5p        | 1 |
| <i>circUSP54</i> | miR-130b-5p        | 1 |
| <i>circUSP54</i> | miR-132-3p/212-3p  | 1 |

|                  |                                      |   |
|------------------|--------------------------------------|---|
| <i>circUSP54</i> | miR-1322                             | 3 |
| <i>circUSP54</i> | miR-134-5p                           | 2 |
| <i>circUSP54</i> | miR-135b-3p                          | 2 |
| <i>circUSP54</i> | miR-136-5p                           | 2 |
| <i>circUSP54</i> | miR-139-3p                           | 3 |
| <i>circUSP54</i> | miR-139-5p                           | 2 |
| <i>circUSP54</i> | miR-140-3p.1                         | 2 |
| <i>circUSP54</i> | miR-140-3p.2                         | 1 |
| <i>circUSP54</i> | miR-141-3p/200-3p                    | 1 |
| <i>circUSP54</i> | miR-141-5p                           | 2 |
| <i>circUSP54</i> | miR-142-5p                           | 2 |
| <i>circUSP54</i> | miR-143-5p                           | 3 |
| <i>circUSP54</i> | miR-144-3p                           | 2 |
| <i>circUSP54</i> | miR-145-5p                           | 4 |
| <i>circUSP54</i> | miR-146b-3p                          | 2 |
| <i>circUSP54</i> | miR-1470                             | 1 |
| <i>circUSP54</i> | miR-148b-5p/6874-3p                  | 2 |
| <i>circUSP54</i> | miR-149-3p/4728-5p/6785-5p/6883-5p   | 2 |
| <i>circUSP54</i> | miR-149-5p                           | 3 |
| <i>circUSP54</i> | miR-15-5p/16-5p/195-5p/424-5p/497-5p | 5 |
| <i>circUSP54</i> | miR-1587/3620-5p                     | 1 |
| <i>circUSP54</i> | miR-16-1-3p                          | 2 |
| <i>circUSP54</i> | miR-16-2-3p/195-3p                   | 1 |
| <i>circUSP54</i> | miR-17-3p                            | 3 |
| <i>circUSP54</i> | miR-181-3p/4420                      | 4 |
| <i>circUSP54</i> | miR-181-5p                           | 2 |
| <i>circUSP54</i> | miR-182-5p                           | 1 |
| <i>circUSP54</i> | miR-183-5p.1                         | 2 |
| <i>circUSP54</i> | miR-183-5p.2                         | 1 |
| <i>circUSP54</i> | miR-185-3p                           | 2 |
| <i>circUSP54</i> | miR-185-5p                           | 4 |
| <i>circUSP54</i> | miR-186-5p                           | 4 |
| <i>circUSP54</i> | miR-188-3p                           | 3 |
| <i>circUSP54</i> | miR-188-5p                           | 3 |
| <i>circUSP54</i> | miR-19-5p                            | 1 |
| <i>circUSP54</i> | miR-1909-3p/6722-3p                  | 2 |
| <i>circUSP54</i> | miR-191-5p                           | 1 |
| <i>circUSP54</i> | miR-1911-3p                          | 4 |

|                  |                     |   |
|------------------|---------------------|---|
| <i>circUSP54</i> | miR-1911-5p         | 2 |
| <i>circUSP54</i> | miR-1915-3p/6764-5p | 6 |
| <i>circUSP54</i> | miR-1915-5p         | 1 |
| <i>circUSP54</i> | miR-196b-3p         | 1 |
| <i>circUSP54</i> | miR-1972            | 2 |
| <i>circUSP54</i> | miR-202-3p          | 4 |
| <i>circUSP54</i> | miR-203a-3p.1       | 2 |
| <i>circUSP54</i> | miR-203b-3p         | 2 |
| <i>circUSP54</i> | miR-204-3p/4646-5p  | 2 |
| <i>circUSP54</i> | miR-2052            | 1 |
| <i>circUSP54</i> | miR-2054            | 2 |
| <i>circUSP54</i> | miR-208-5p          | 1 |
| <i>circUSP54</i> | miR-21-5p/590-5p    | 3 |
| <i>circUSP54</i> | miR-210-5p          | 4 |
| <i>circUSP54</i> | miR-2115-3p         | 2 |
| <i>circUSP54</i> | miR-2116-5p         | 3 |
| <i>circUSP54</i> | miR-212-5p          | 1 |
| <i>circUSP54</i> | miR-214-3p/3619-5p  | 7 |
| <i>circUSP54</i> | miR-215-3p          | 2 |
| <i>circUSP54</i> | miR-216a-5p         | 2 |
| <i>circUSP54</i> | miR-216b-5p         | 2 |
| <i>circUSP54</i> | miR-217             | 2 |
| <i>circUSP54</i> | miR-22-3p           | 2 |
| <i>circUSP54</i> | miR-22-5p           | 3 |
| <i>circUSP54</i> | miR-221-5p/8073     | 2 |
| <i>circUSP54</i> | miR-223-3p          | 1 |
| <i>circUSP54</i> | miR-223-5p          | 1 |
| <i>circUSP54</i> | miR-2277-3p         | 1 |
| <i>circUSP54</i> | miR-2278            | 2 |
| <i>circUSP54</i> | miR-2355-3p         | 1 |
| <i>circUSP54</i> | miR-2355-5p         | 4 |
| <i>circUSP54</i> | miR-2392            | 6 |
| <i>circUSP54</i> | miR-2467-3p         | 2 |
| <i>circUSP54</i> | miR-26-5p           | 1 |
| <i>circUSP54</i> | miR-28-5p/708-5p    | 2 |
| <i>circUSP54</i> | miR-29-3p           | 2 |
| <i>circUSP54</i> | miR-296-5p          | 3 |
| <i>circUSP54</i> | miR-299-3p          | 3 |



|                  |                          |   |
|------------------|--------------------------|---|
| <i>circUSP54</i> | miR-30-3p                | 2 |
| <i>circUSP54</i> | miR-301a-5p/301b-5p      | 3 |
| <i>circUSP54</i> | miR-3065-3p              | 3 |
| <i>circUSP54</i> | miR-31-3p                | 2 |
| <i>circUSP54</i> | miR-3117-3p              | 2 |
| <i>circUSP54</i> | miR-3117-5p              | 1 |
| <i>circUSP54</i> | miR-3120-3p              | 3 |
| <i>circUSP54</i> | miR-3121-3p              | 2 |
| <i>circUSP54</i> | miR-3122/3913-5p         | 1 |
| <i>circUSP54</i> | miR-3123                 | 2 |
| <i>circUSP54</i> | miR-3124-3p              | 1 |
| <i>circUSP54</i> | miR-3125/3916/6859-5p    | 8 |
| <i>circUSP54</i> | miR-3126-3p              | 4 |
| <i>circUSP54</i> | miR-3126-5p              | 2 |
| <i>circUSP54</i> | miR-3127-3p/6756-3p      | 2 |
| <i>circUSP54</i> | miR-3127-5p              | 2 |
| <i>circUSP54</i> | miR-3130-3p              | 1 |
| <i>circUSP54</i> | miR-3130-5p/4482-5p      | 4 |
| <i>circUSP54</i> | miR-3133                 | 4 |
| <i>circUSP54</i> | miR-3136-3p/7155-3p      | 3 |
| <i>circUSP54</i> | miR-3136-5p/4439         | 4 |
| <i>circUSP54</i> | miR-3138                 | 1 |
| <i>circUSP54</i> | miR-3144-3p              | 3 |
| <i>circUSP54</i> | miR-3144-5p              | 1 |
| <i>circUSP54</i> | miR-3146                 | 2 |
| <i>circUSP54</i> | miR-3147                 | 1 |
| <i>circUSP54</i> | miR-3148                 | 2 |
| <i>circUSP54</i> | miR-3150a-5p/3150b-5p    | 6 |
| <i>circUSP54</i> | miR-3150b-3p             | 6 |
| <i>circUSP54</i> | miR-3153/6733-5p/6739-5p | 2 |
| <i>circUSP54</i> | miR-3156-3p              | 3 |
| <i>circUSP54</i> | miR-3157-5p              | 4 |
| <i>circUSP54</i> | miR-3158-5p              | 3 |
| <i>circUSP54</i> | miR-3159                 | 2 |
| <i>circUSP54</i> | miR-3160-3p              | 1 |
| <i>circUSP54</i> | miR-3162-3p              | 1 |
| <i>circUSP54</i> | miR-3164                 | 2 |
| <i>circUSP54</i> | miR-3165                 | 1 |

|                  |                           |   |
|------------------|---------------------------|---|
| <i>circUSP54</i> | miR-3168                  | 2 |
| <i>circUSP54</i> | miR-3171                  | 1 |
| <i>circUSP54</i> | miR-3173-3p/6891-5p       | 1 |
| <i>circUSP54</i> | miR-3173-5p               | 2 |
| <i>circUSP54</i> | miR-3174                  | 6 |
| <i>circUSP54</i> | miR-3175                  | 1 |
| <i>circUSP54</i> | miR-3177-3p               | 1 |
| <i>circUSP54</i> | miR-3180-5p               | 4 |
| <i>circUSP54</i> | miR-3182                  | 1 |
| <i>circUSP54</i> | miR-3183/4723-3p/6769b-3p | 2 |
| <i>circUSP54</i> | miR-3189-3p               | 1 |
| <i>circUSP54</i> | miR-3189-5p               | 2 |
| <i>circUSP54</i> | miR-3190-3p               | 3 |
| <i>circUSP54</i> | miR-3191-3p               | 1 |
| <i>circUSP54</i> | miR-3191-5p               | 7 |
| <i>circUSP54</i> | miR-3192-3p               | 1 |
| <i>circUSP54</i> | miR-3192-5p               | 2 |
| <i>circUSP54</i> | miR-3194-3p               | 2 |
| <i>circUSP54</i> | miR-3199/8052             | 1 |
| <i>circUSP54</i> | miR-3200-3p               | 1 |
| <i>circUSP54</i> | miR-3200-5p               | 2 |
| <i>circUSP54</i> | miR-3202                  | 2 |
| <i>circUSP54</i> | miR-320e                  | 2 |
| <i>circUSP54</i> | miR-323-3p                | 4 |
| <i>circUSP54</i> | miR-326                   | 2 |
| <i>circUSP54</i> | miR-329-3p/362-3p         | 2 |
| <i>circUSP54</i> | miR-330-3p.2              | 1 |
| <i>circUSP54</i> | miR-331-3p                | 2 |
| <i>circUSP54</i> | miR-335-3p                | 3 |
| <i>circUSP54</i> | miR-335-5p                | 2 |
| <i>circUSP54</i> | miR-338-3p                | 6 |
| <i>circUSP54</i> | miR-339-3p                | 2 |
| <i>circUSP54</i> | miR-339-5p                | 1 |
| <i>circUSP54</i> | miR-34a-3p                | 2 |
| <i>circUSP54</i> | miR-3605-5p               | 8 |
| <i>circUSP54</i> | miR-3606-5p               | 2 |
| <i>circUSP54</i> | miR-361-3p                | 2 |
| <i>circUSP54</i> | miR-361-5p                | 2 |

|                  |                           |   |
|------------------|---------------------------|---|
| <i>circUSP54</i> | miR-3613-3p               | 4 |
| <i>circUSP54</i> | miR-3614-3p               | 2 |
| <i>circUSP54</i> | miR-3615                  | 2 |
| <i>circUSP54</i> | miR-3617-3p               | 2 |
| <i>circUSP54</i> | miR-3618                  | 1 |
| <i>circUSP54</i> | miR-3619-3p               | 1 |
| <i>circUSP54</i> | miR-3620-3p               | 3 |
| <i>circUSP54</i> | miR-3622a-3p/3622b-3p     | 1 |
| <i>circUSP54</i> | miR-3622a-5p              | 1 |
| <i>circUSP54</i> | miR-3622b-5p              | 2 |
| <i>circUSP54</i> | miR-3646                  | 1 |
| <i>circUSP54</i> | miR-365-3p                | 1 |
| <i>circUSP54</i> | miR-3651                  | 2 |
| <i>circUSP54</i> | miR-3655                  | 1 |
| <i>circUSP54</i> | miR-365a-5p/365b-5p       | 1 |
| <i>circUSP54</i> | miR-3660/4526             | 3 |
| <i>circUSP54</i> | miR-3662                  | 1 |
| <i>circUSP54</i> | miR-3663-5p               | 2 |
| <i>circUSP54</i> | miR-3664-3p               | 2 |
| <i>circUSP54</i> | miR-3668                  | 3 |
| <i>circUSP54</i> | miR-3670                  | 3 |
| <i>circUSP54</i> | miR-3671                  | 1 |
| <i>circUSP54</i> | miR-3675-3p               | 2 |
| <i>circUSP54</i> | miR-3678-3p               | 2 |
| <i>circUSP54</i> | miR-3682-3p               | 8 |
| <i>circUSP54</i> | miR-3682-5p               | 1 |
| <i>circUSP54</i> | miR-3688-3p               | 3 |
| <i>circUSP54</i> | miR-3690                  | 2 |
| <i>circUSP54</i> | miR-3692-3p               | 2 |
| <i>circUSP54</i> | miR-3692-5p               | 4 |
| <i>circUSP54</i> | miR-370-3p                | 2 |
| <i>circUSP54</i> | miR-371-5p                | 1 |
| <i>circUSP54</i> | miR-371b-5p/373-5p/616-5p | 1 |
| <i>circUSP54</i> | miR-372-5p                | 1 |
| <i>circUSP54</i> | miR-374-5p                | 1 |
| <i>circUSP54</i> | miR-374a-3p               | 3 |
| <i>circUSP54</i> | miR-374c-3p               | 2 |
| <i>circUSP54</i> | miR-376-3p                | 1 |

|                  |                     |   |
|------------------|---------------------|---|
| <i>circUSP54</i> | miR-376c-3p         | 2 |
| <i>circUSP54</i> | miR-378j/6839-5p    | 6 |
| <i>circUSP54</i> | miR-380-3p          | 3 |
| <i>circUSP54</i> | miR-383-3p          | 3 |
| <i>circUSP54</i> | miR-3908            | 4 |
| <i>circUSP54</i> | miR-3914            | 1 |
| <i>circUSP54</i> | miR-3915            | 2 |
| <i>circUSP54</i> | miR-3919            | 1 |
| <i>circUSP54</i> | miR-3920            | 1 |
| <i>circUSP54</i> | miR-3921/4653-5p    | 3 |
| <i>circUSP54</i> | miR-3925-5p         | 2 |
| <i>circUSP54</i> | miR-3926            | 2 |
| <i>circUSP54</i> | miR-3928-3p         | 3 |
| <i>circUSP54</i> | miR-3929/4419b/4478 | 2 |
| <i>circUSP54</i> | miR-3934-5p         | 1 |
| <i>circUSP54</i> | miR-3936            | 2 |
| <i>circUSP54</i> | miR-3938            | 1 |
| <i>circUSP54</i> | miR-3942-3p         | 3 |
| <i>circUSP54</i> | miR-3942-5p         | 4 |
| <i>circUSP54</i> | miR-3943            | 7 |
| <i>circUSP54</i> | miR-3945            | 3 |
| <i>circUSP54</i> | miR-3976            | 4 |
| <i>circUSP54</i> | miR-3978            | 2 |
| <i>circUSP54</i> | miR-423-3p          | 1 |
| <i>circUSP54</i> | miR-425-3p          | 2 |
| <i>circUSP54</i> | miR-425-5p          | 3 |
| <i>circUSP54</i> | miR-4251            | 2 |
| <i>circUSP54</i> | miR-4253/6862-5p    | 3 |
| <i>circUSP54</i> | miR-4254            | 2 |
| <i>circUSP54</i> | miR-4257            | 3 |
| <i>circUSP54</i> | miR-4259            | 3 |
| <i>circUSP54</i> | miR-4266            | 2 |
| <i>circUSP54</i> | miR-4267            | 2 |
| <i>circUSP54</i> | miR-4268            | 1 |
| <i>circUSP54</i> | miR-4269/6715b-5p   | 1 |
| <i>circUSP54</i> | miR-4273/7156-5p    | 1 |
| <i>circUSP54</i> | miR-4274            | 4 |
| <i>circUSP54</i> | miR-4277            | 3 |

|                  |                                    |   |
|------------------|------------------------------------|---|
| <i>circUSP54</i> | miR-4279                           | 2 |
| <i>circUSP54</i> | miR-4290                           | 1 |
| <i>circUSP54</i> | miR-4291                           | 2 |
| <i>circUSP54</i> | miR-4292/6791-5p                   | 2 |
| <i>circUSP54</i> | miR-4293                           | 4 |
| <i>circUSP54</i> | miR-4303                           | 2 |
| <i>circUSP54</i> | miR-4307                           | 2 |
| <i>circUSP54</i> | miR-4308                           | 2 |
| <i>circUSP54</i> | miR-4311                           | 4 |
| <i>circUSP54</i> | miR-4312                           | 1 |
| <i>circUSP54</i> | miR-4313                           | 2 |
| <i>circUSP54</i> | miR-4318                           | 2 |
| <i>circUSP54</i> | miR-432-3p                         | 6 |
| <i>circUSP54</i> | miR-4320                           | 2 |
| <i>circUSP54</i> | miR-4323                           | 7 |
| <i>circUSP54</i> | miR-4324                           | 2 |
| <i>circUSP54</i> | miR-4328                           | 2 |
| <i>circUSP54</i> | miR-4329                           | 2 |
| <i>circUSP54</i> | miR-4330                           | 7 |
| <i>circUSP54</i> | miR-4419a/4510/6127/6129/6130/6133 | 2 |
| <i>circUSP54</i> | miR-4421/5699-3p                   | 1 |
| <i>circUSP54</i> | miR-4422                           | 1 |
| <i>circUSP54</i> | miR-4423-3p                        | 1 |
| <i>circUSP54</i> | miR-4425                           | 1 |
| <i>circUSP54</i> | miR-4427                           | 2 |
| <i>circUSP54</i> | miR-4428                           | 1 |
| <i>circUSP54</i> | miR-4433a-5p                       | 4 |
| <i>circUSP54</i> | miR-4437                           | 2 |
| <i>circUSP54</i> | miR-4438                           | 4 |
| <i>circUSP54</i> | miR-4448                           | 1 |
| <i>circUSP54</i> | miR-4468                           | 3 |
| <i>circUSP54</i> | miR-4470                           | 2 |
| <i>circUSP54</i> | miR-4474-3p                        | 2 |
| <i>circUSP54</i> | miR-4476/6876-5p                   | 3 |
| <i>circUSP54</i> | miR-4480                           | 2 |
| <i>circUSP54</i> | miR-4484                           | 2 |
| <i>circUSP54</i> | miR-4487                           | 1 |
| <i>circUSP54</i> | miR-4491/4657                      | 3 |

|                  |                       |   |
|------------------|-----------------------|---|
| <i>circUSP54</i> | miR-4495              | 2 |
| <i>circUSP54</i> | miR-4496              | 2 |
| <i>circUSP54</i> | miR-4504              | 1 |
| <i>circUSP54</i> | miR-4509              | 1 |
| <i>circUSP54</i> | miR-450a-1-3p         | 1 |
| <i>circUSP54</i> | miR-4513/6855-3p      | 2 |
| <i>circUSP54</i> | miR-4514/4692         | 1 |
| <i>circUSP54</i> | miR-4517              | 1 |
| <i>circUSP54</i> | miR-4519              | 4 |
| <i>circUSP54</i> | miR-451b              | 1 |
| <i>circUSP54</i> | miR-452-3p            | 2 |
| <i>circUSP54</i> | miR-4524a-3p          | 3 |
| <i>circUSP54</i> | miR-4524b-3p          | 1 |
| <i>circUSP54</i> | miR-4528              | 3 |
| <i>circUSP54</i> | miR-4530              | 6 |
| <i>circUSP54</i> | miR-4531              | 2 |
| <i>circUSP54</i> | miR-4533              | 2 |
| <i>circUSP54</i> | miR-4535              | 1 |
| <i>circUSP54</i> | miR-4539              | 2 |
| <i>circUSP54</i> | miR-455-3p.2          | 3 |
| <i>circUSP54</i> | miR-4633-3p/6500-5p   | 2 |
| <i>circUSP54</i> | miR-4639-3p           | 2 |
| <i>circUSP54</i> | miR-4640-3p           | 1 |
| <i>circUSP54</i> | miR-4640-5p           | 2 |
| <i>circUSP54</i> | miR-4642              | 1 |
| <i>circUSP54</i> | miR-4643              | 2 |
| <i>circUSP54</i> | miR-4645-3p           | 6 |
| <i>circUSP54</i> | miR-4645-5p/4673      | 4 |
| <i>circUSP54</i> | miR-4646-3p           | 1 |
| <i>circUSP54</i> | miR-4649-3p           | 2 |
| <i>circUSP54</i> | miR-4650-5p           | 2 |
| <i>circUSP54</i> | miR-4652-5p           | 1 |
| <i>circUSP54</i> | miR-4655-5p           | 2 |
| <i>circUSP54</i> | miR-4658/6790-5p      | 2 |
| <i>circUSP54</i> | miR-4659a-3p/4659b-3p | 4 |
| <i>circUSP54</i> | miR-4659a-5p/4659b-5p | 2 |
| <i>circUSP54</i> | miR-4662-5p           | 1 |
| <i>circUSP54</i> | miR-4663              | 3 |

|                  |                          |   |
|------------------|--------------------------|---|
| <i>circUSP54</i> | miR-4667-3p              | 1 |
| <i>circUSP54</i> | miR-4667-5p/4700-5p/8089 | 1 |
| <i>circUSP54</i> | miR-4668-3p              | 2 |
| <i>circUSP54</i> | miR-4668-5p              | 2 |
| <i>circUSP54</i> | miR-4674                 | 1 |
| <i>circUSP54</i> | miR-4677-5p              | 1 |
| <i>circUSP54</i> | miR-4680-3p              | 2 |
| <i>circUSP54</i> | miR-4682                 | 2 |
| <i>circUSP54</i> | miR-4683                 | 3 |
| <i>circUSP54</i> | miR-4685-5p/6837-5p      | 2 |
| <i>circUSP54</i> | miR-4687-5p              | 4 |
| <i>circUSP54</i> | miR-4688/6743-5p         | 4 |
| <i>circUSP54</i> | miR-4689/6858-5p         | 2 |
| <i>circUSP54</i> | miR-4690-3p/5685         | 5 |
| <i>circUSP54</i> | miR-4690-5p              | 3 |
| <i>circUSP54</i> | miR-4691-3p              | 1 |
| <i>circUSP54</i> | miR-4693-3p              | 2 |
| <i>circUSP54</i> | miR-4694-3p              | 3 |
| <i>circUSP54</i> | miR-4695-5p              | 5 |
| <i>circUSP54</i> | miR-4696                 | 4 |
| <i>circUSP54</i> | miR-4697-3p              | 1 |
| <i>circUSP54</i> | miR-4698                 | 2 |
| <i>circUSP54</i> | miR-4699-3p              | 1 |
| <i>circUSP54</i> | miR-4699-5p              | 4 |
| <i>circUSP54</i> | miR-4703-3p              | 2 |
| <i>circUSP54</i> | miR-4704-3p              | 5 |
| <i>circUSP54</i> | miR-4709-3p              | 6 |
| <i>circUSP54</i> | miR-4709-5p              | 1 |
| <i>circUSP54</i> | miR-4710                 | 2 |
| <i>circUSP54</i> | miR-4711-5p              | 3 |
| <i>circUSP54</i> | miR-4715-5p              | 3 |
| <i>circUSP54</i> | miR-4716-5p              | 2 |
| <i>circUSP54</i> | miR-4717-3p              | 2 |
| <i>circUSP54</i> | miR-4722-3p/6727-3p      | 5 |
| <i>circUSP54</i> | miR-4722-5p              | 2 |
| <i>circUSP54</i> | miR-4724-3p              | 1 |
| <i>circUSP54</i> | miR-4724-5p              | 1 |
| <i>circUSP54</i> | miR-4725-5p              | 2 |

|                  |                     |   |
|------------------|---------------------|---|
| <i>circUSP54</i> | miR-4726-3p         | 6 |
| <i>circUSP54</i> | miR-4731-5p         | 1 |
| <i>circUSP54</i> | miR-4738-3p         | 1 |
| <i>circUSP54</i> | miR-4738-5p         | 1 |
| <i>circUSP54</i> | miR-4739            | 2 |
| <i>circUSP54</i> | miR-4742-5p         | 1 |
| <i>circUSP54</i> | miR-4744            | 1 |
| <i>circUSP54</i> | miR-4749-3p         | 4 |
| <i>circUSP54</i> | miR-4752            | 3 |
| <i>circUSP54</i> | miR-4753-3p         | 1 |
| <i>circUSP54</i> | miR-4755-3p         | 2 |
| <i>circUSP54</i> | miR-4756-3p         | 1 |
| <i>circUSP54</i> | miR-4757-5p/6744-3p | 2 |
| <i>circUSP54</i> | miR-4758-3p         | 2 |
| <i>circUSP54</i> | miR-4760-3p         | 1 |
| <i>circUSP54</i> | miR-4762-3p         | 3 |
| <i>circUSP54</i> | miR-4764-5p         | 3 |
| <i>circUSP54</i> | miR-4765            | 4 |
| <i>circUSP54</i> | miR-4766-5p         | 1 |
| <i>circUSP54</i> | miR-4768-5p/6833-3p | 4 |
| <i>circUSP54</i> | miR-4776-5p         | 1 |
| <i>circUSP54</i> | miR-4777-3p         | 1 |
| <i>circUSP54</i> | miR-4778-3p         | 8 |
| <i>circUSP54</i> | miR-4779            | 5 |
| <i>circUSP54</i> | miR-4786-5p         | 4 |
| <i>circUSP54</i> | miR-4789-3p         | 2 |
| <i>circUSP54</i> | miR-4790-3p         | 2 |
| <i>circUSP54</i> | miR-4792            | 2 |
| <i>circUSP54</i> | miR-4793-3p         | 1 |
| <i>circUSP54</i> | miR-4797-5p         | 1 |
| <i>circUSP54</i> | miR-4800-5p         | 1 |
| <i>circUSP54</i> | miR-4802-3p         | 2 |
| <i>circUSP54</i> | miR-4802-5p         | 2 |
| <i>circUSP54</i> | miR-484/3155        | 4 |
| <i>circUSP54</i> | miR-486-3p          | 4 |
| <i>circUSP54</i> | miR-488-3p          | 2 |
| <i>circUSP54</i> | miR-488-5p          | 1 |
| <i>circUSP54</i> | miR-490-5p          | 2 |



|                  |                             |   |
|------------------|-----------------------------|---|
| <i>circUSP54</i> | miR-491-3p                  | 2 |
| <i>circUSP54</i> | miR-492                     | 2 |
| <i>circUSP54</i> | miR-494-3p                  | 3 |
| <i>circUSP54</i> | miR-495-3p                  | 4 |
| <i>circUSP54</i> | miR-497-3p                  | 1 |
| <i>circUSP54</i> | miR-5000-3p                 | 5 |
| <i>circUSP54</i> | miR-5000-5p                 | 1 |
| <i>circUSP54</i> | miR-5002-5p                 | 1 |
| <i>circUSP54</i> | miR-5004-3p                 | 3 |
| <i>circUSP54</i> | miR-500b-3p                 | 2 |
| <i>circUSP54</i> | miR-502-5p                  | 2 |
| <i>circUSP54</i> | miR-503-5p                  | 5 |
| <i>circUSP54</i> | miR-504-3p                  | 1 |
| <i>circUSP54</i> | miR-504-5p.1                | 2 |
| <i>circUSP54</i> | miR-506-5p                  | 4 |
| <i>circUSP54</i> | miR-5089-3p                 | 2 |
| <i>circUSP54</i> | miR-509-3-5p/509-5p/4418    | 2 |
| <i>circUSP54</i> | miR-509-3p                  | 2 |
| <i>circUSP54</i> | miR-5091                    | 1 |
| <i>circUSP54</i> | miR-5093                    | 2 |
| <i>circUSP54</i> | miR-513a-3p/513c-3p/3606-3p | 2 |
| <i>circUSP54</i> | miR-513b-3p                 | 2 |
| <i>circUSP54</i> | miR-513c-5p/514b-5p         | 1 |
| <i>circUSP54</i> | miR-514a-3p                 | 3 |
| <i>circUSP54</i> | miR-5186                    | 3 |
| <i>circUSP54</i> | miR-5187-3p                 | 2 |
| <i>circUSP54</i> | miR-518c-5p                 | 2 |
| <i>circUSP54</i> | miR-518e-3p                 | 1 |
| <i>circUSP54</i> | miR-5190                    | 7 |
| <i>circUSP54</i> | miR-5192                    | 4 |
| <i>circUSP54</i> | miR-5193                    | 2 |
| <i>circUSP54</i> | miR-5197-5p                 | 1 |
| <i>circUSP54</i> | miR-519d-5p                 | 1 |
| <i>circUSP54</i> | miR-522-3p                  | 3 |
| <i>circUSP54</i> | miR-524-3p/525-3p           | 2 |
| <i>circUSP54</i> | miR-524-5p                  | 1 |
| <i>circUSP54</i> | miR-532-5p                  | 2 |
| <i>circUSP54</i> | miR-539-3p                  | 2 |

|                  |                                                                  |   |
|------------------|------------------------------------------------------------------|---|
| <i>circUSP54</i> | miR-539-5p                                                       | 2 |
| <i>circUSP54</i> | miR-542-3p                                                       | 1 |
| <i>circUSP54</i> | miR-542-5p                                                       | 1 |
| <i>circUSP54</i> | miR-543                                                          | 2 |
| <i>circUSP54</i> | miR-544b                                                         | 2 |
| <i>circUSP54</i> | miR-548ac/548bb-3p/548d-3p/548h-3p/548z                          |   |
| <i>circUSP54</i> | miR-548an                                                        | 2 |
| <i>circUSP54</i> | miR-548ap-3p/548aa/548t-3p                                       | 4 |
| <i>circUSP54</i> | miR-548aq-3p/548am-3p/548aj-3p/548ah-3p/548ae-3p/548j-3p/548x-3p |   |
| <i>circUSP54</i> | miR-548as-3p                                                     | 4 |
| <i>circUSP54</i> | miR-548ay-3p/548at-3p                                            | 4 |
| <i>circUSP54</i> | miR-548g-3p                                                      | 4 |
| <i>circUSP54</i> | miR-556-5p                                                       | 2 |
| <i>circUSP54</i> | miR-5571-3p                                                      | 3 |
| <i>circUSP54</i> | miR-5579-3p                                                      | 1 |
| <i>circUSP54</i> | miR-558                                                          | 1 |
| <i>circUSP54</i> | miR-5581-3p                                                      | 1 |
| <i>circUSP54</i> | miR-5582-5p                                                      | 1 |
| <i>circUSP54</i> | miR-5583-3p                                                      | 1 |
| <i>circUSP54</i> | miR-5584-3p                                                      | 2 |
| <i>circUSP54</i> | miR-5585-3p                                                      | 2 |
| <i>circUSP54</i> | miR-5586-3p                                                      | 2 |
| <i>circUSP54</i> | miR-5586-5p                                                      | 4 |
| <i>circUSP54</i> | miR-5587-5p                                                      | 1 |
| <i>circUSP54</i> | miR-5589-3p                                                      | 4 |
| <i>circUSP54</i> | miR-5589-5p                                                      | 1 |
| <i>circUSP54</i> | miR-5590-5p                                                      | 2 |
| <i>circUSP54</i> | miR-5591-3p                                                      | 2 |
| <i>circUSP54</i> | miR-561-5p                                                       | 3 |
| <i>circUSP54</i> | miR-5680                                                         | 3 |
| <i>circUSP54</i> | miR-5681a                                                        | 4 |
| <i>circUSP54</i> | miR-5683                                                         | 2 |
| <i>circUSP54</i> | miR-5690                                                         | 1 |
| <i>circUSP54</i> | miR-5695                                                         | 1 |
| <i>circUSP54</i> | miR-5697                                                         | 2 |
| <i>circUSP54</i> | miR-5699-5p                                                      | 2 |
| <i>circUSP54</i> | miR-5700                                                         | 2 |
| <i>circUSP54</i> | miR-5702                                                         | 2 |

|                  |                    |   |
|------------------|--------------------|---|
| <i>circUSP54</i> | miR-5739           | 1 |
| <i>circUSP54</i> | miR-575/4676-5p    | 2 |
| <i>circUSP54</i> | miR-580-3p         | 2 |
| <i>circUSP54</i> | miR-580-5p         | 2 |
| <i>circUSP54</i> | miR-583            | 4 |
| <i>circUSP54</i> | miR-584-3p         | 2 |
| <i>circUSP54</i> | miR-586            | 2 |
| <i>circUSP54</i> | miR-587            | 1 |
| <i>circUSP54</i> | miR-591            | 1 |
| <i>circUSP54</i> | miR-596            | 4 |
| <i>circUSP54</i> | miR-603            | 2 |
| <i>circUSP54</i> | miR-605-5p         | 2 |
| <i>circUSP54</i> | miR-607            | 4 |
| <i>circUSP54</i> | miR-6079           | 3 |
| <i>circUSP54</i> | miR-6085/6813-5p   | 4 |
| <i>circUSP54</i> | miR-6090           | 1 |
| <i>circUSP54</i> | miR-610            | 1 |
| <i>circUSP54</i> | miR-6124           | 2 |
| <i>circUSP54</i> | miR-6132/6836-5p   | 2 |
| <i>circUSP54</i> | miR-6165           | 3 |
| <i>circUSP54</i> | miR-619-5p/6506-5p | 2 |
| <i>circUSP54</i> | miR-624-5p         | 2 |
| <i>circUSP54</i> | miR-627-3p         | 2 |
| <i>circUSP54</i> | miR-627-5p         | 3 |
| <i>circUSP54</i> | miR-631/3661       | 2 |
| <i>circUSP54</i> | miR-633            | 1 |
| <i>circUSP54</i> | miR-634            | 4 |
| <i>circUSP54</i> | miR-635/6774-5p    | 1 |
| <i>circUSP54</i> | miR-637            | 1 |
| <i>circUSP54</i> | miR-640            | 2 |
| <i>circUSP54</i> | miR-642-3p         | 3 |
| <i>circUSP54</i> | miR-646            | 5 |
| <i>circUSP54</i> | miR-6499-3p        | 4 |
| <i>circUSP54</i> | miR-6501-3p        | 1 |
| <i>circUSP54</i> | miR-6502-3p        | 5 |
| <i>circUSP54</i> | miR-6505-5p        | 2 |
| <i>circUSP54</i> | miR-6507-5p        | 1 |
| <i>circUSP54</i> | miR-6508-3p        | 2 |

|                  |                     |   |
|------------------|---------------------|---|
| <i>circUSP54</i> | miR-6508-5p/8067    | 1 |
| <i>circUSP54</i> | miR-651-3p          | 2 |
| <i>circUSP54</i> | miR-651-5p          | 3 |
| <i>circUSP54</i> | miR-6510-5p         | 3 |
| <i>circUSP54</i> | miR-6511-3p         | 2 |
| <i>circUSP54</i> | miR-6511-5p         | 2 |
| <i>circUSP54</i> | miR-6513-3p         | 3 |
| <i>circUSP54</i> | miR-6513-5p         | 1 |
| <i>circUSP54</i> | miR-6514-3p         | 1 |
| <i>circUSP54</i> | miR-6514-5p         | 2 |
| <i>circUSP54</i> | miR-6515-3p         | 1 |
| <i>circUSP54</i> | miR-6516-3p         | 2 |
| <i>circUSP54</i> | miR-653-3p          | 4 |
| <i>circUSP54</i> | miR-654-3p          | 2 |
| <i>circUSP54</i> | miR-659-5p          | 2 |
| <i>circUSP54</i> | miR-660-3p          | 2 |
| <i>circUSP54</i> | miR-661             | 1 |
| <i>circUSP54</i> | miR-664a-3p         | 1 |
| <i>circUSP54</i> | miR-664a-5p/4794    | 3 |
| <i>circUSP54</i> | miR-665             | 1 |
| <i>circUSP54</i> | miR-668-3p          | 3 |
| <i>circUSP54</i> | miR-670-3p          | 2 |
| <i>circUSP54</i> | miR-670-5p          | 2 |
| <i>circUSP54</i> | miR-671-5p          | 3 |
| <i>circUSP54</i> | miR-6715a-3p        | 1 |
| <i>circUSP54</i> | miR-6715b-3p        | 4 |
| <i>circUSP54</i> | miR-6717-5p         | 2 |
| <i>circUSP54</i> | miR-6719-3p         | 3 |
| <i>circUSP54</i> | miR-6720-5p         | 4 |
| <i>circUSP54</i> | miR-6721-5p         | 2 |
| <i>circUSP54</i> | miR-6724-5p/6773-5p | 2 |
| <i>circUSP54</i> | miR-6727-5p         | 1 |
| <i>circUSP54</i> | miR-6729-3p         | 1 |
| <i>circUSP54</i> | miR-6730-3p         | 3 |
| <i>circUSP54</i> | miR-6730-5p         | 4 |
| <i>circUSP54</i> | miR-6731-5p/8085    | 1 |
| <i>circUSP54</i> | miR-6744-5p         | 3 |
| <i>circUSP54</i> | miR-6747-3p         | 5 |

|                  |                     |   |
|------------------|---------------------|---|
| <i>circUSP54</i> | miR-6748-3p         | 1 |
| <i>circUSP54</i> | miR-6749-5p         | 2 |
| <i>circUSP54</i> | miR-6752-3p         | 5 |
| <i>circUSP54</i> | miR-6755-5p         | 2 |
| <i>circUSP54</i> | miR-6757-3p         | 1 |
| <i>circUSP54</i> | miR-6758-5p/6856-5p | 2 |
| <i>circUSP54</i> | miR-676-3p          | 2 |
| <i>circUSP54</i> | miR-6760-3p         | 2 |
| <i>circUSP54</i> | miR-6760-5p         | 2 |
| <i>circUSP54</i> | miR-6761-5p         | 2 |
| <i>circUSP54</i> | miR-6762-5p/6845-5p | 1 |
| <i>circUSP54</i> | miR-6764-3p/6824-3p | 2 |
| <i>circUSP54</i> | miR-6765-3p         | 1 |
| <i>circUSP54</i> | miR-6768-3p         | 2 |
| <i>circUSP54</i> | miR-6768-5p         | 5 |
| <i>circUSP54</i> | miR-6769a-3p        | 7 |
| <i>circUSP54</i> | miR-6770-5p         | 1 |
| <i>circUSP54</i> | miR-6771-5p         | 2 |
| <i>circUSP54</i> | miR-6773-3p         | 2 |
| <i>circUSP54</i> | miR-6777-5p/6889-5p | 1 |
| <i>circUSP54</i> | miR-6778-3p         | 3 |
| <i>circUSP54</i> | miR-6779-3p         | 4 |
| <i>circUSP54</i> | miR-6780a-3p        | 1 |
| <i>circUSP54</i> | miR-6782-3p         | 3 |
| <i>circUSP54</i> | miR-6783-5p         | 1 |
| <i>circUSP54</i> | miR-6784-3p/6862-3p | 2 |
| <i>circUSP54</i> | miR-6791-3p/6829-3p | 3 |
| <i>circUSP54</i> | miR-6793-3p         | 2 |
| <i>circUSP54</i> | miR-6798-3p         | 2 |
| <i>circUSP54</i> | miR-6798-5p         | 3 |
| <i>circUSP54</i> | miR-6799-5p         | 2 |
| <i>circUSP54</i> | miR-6800-3p         | 1 |
| <i>circUSP54</i> | miR-6801-3p/6810-3p | 2 |
| <i>circUSP54</i> | miR-6801-5p         | 1 |
| <i>circUSP54</i> | miR-6802-3p         | 1 |
| <i>circUSP54</i> | miR-6806-5p         | 2 |
| <i>circUSP54</i> | miR-6807-5p         | 2 |
| <i>circUSP54</i> | miR-6809-3p         | 4 |

|                  |             |   |
|------------------|-------------|---|
| <i>circUSP54</i> | miR-6813-3p | 1 |
| <i>circUSP54</i> | miR-6814-5p | 2 |
| <i>circUSP54</i> | miR-6815-3p | 4 |
| <i>circUSP54</i> | miR-6816-3p | 2 |
| <i>circUSP54</i> | miR-6817-3p | 3 |
| <i>circUSP54</i> | miR-6818-3p | 1 |
| <i>circUSP54</i> | miR-6822-3p | 4 |
| <i>circUSP54</i> | miR-6823-5p | 2 |
| <i>circUSP54</i> | miR-6825-5p | 1 |
| <i>circUSP54</i> | miR-6827-5p | 2 |
| <i>circUSP54</i> | miR-6828-5p | 3 |
| <i>circUSP54</i> | miR-6830-5p | 1 |
| <i>circUSP54</i> | miR-6831-3p | 1 |
| <i>circUSP54</i> | miR-6832-3p | 3 |
| <i>circUSP54</i> | miR-6833-5p | 3 |
| <i>circUSP54</i> | miR-6834-3p | 1 |
| <i>circUSP54</i> | miR-6836-3p | 4 |
| <i>circUSP54</i> | miR-6840-3p | 6 |
| <i>circUSP54</i> | miR-6840-5p | 1 |
| <i>circUSP54</i> | miR-6841-3p | 1 |
| <i>circUSP54</i> | miR-6841-5p | 2 |
| <i>circUSP54</i> | miR-6844    | 1 |
| <i>circUSP54</i> | miR-6845-3p | 2 |
| <i>circUSP54</i> | miR-6847-3p | 1 |
| <i>circUSP54</i> | miR-6847-5p | 3 |
| <i>circUSP54</i> | miR-6849-3p | 2 |
| <i>circUSP54</i> | miR-6853-3p | 1 |
| <i>circUSP54</i> | miR-6854-5p | 2 |
| <i>circUSP54</i> | miR-6856-3p | 1 |
| <i>circUSP54</i> | miR-6857-3p | 2 |
| <i>circUSP54</i> | miR-6858-3p | 2 |
| <i>circUSP54</i> | miR-6861-3p | 2 |
| <i>circUSP54</i> | miR-6871-3p | 2 |
| <i>circUSP54</i> | miR-6872-3p | 1 |
| <i>circUSP54</i> | miR-6873-3p | 1 |
| <i>circUSP54</i> | miR-6875-3p | 4 |
| <i>circUSP54</i> | miR-6878-5p | 1 |
| <i>circUSP54</i> | miR-6880-5p | 1 |

|                  |             |   |
|------------------|-------------|---|
| <i>circUSP54</i> | miR-6881-3p | 1 |
| <i>circUSP54</i> | miR-6883-3p | 1 |
| <i>circUSP54</i> | miR-6885-3p | 4 |
| <i>circUSP54</i> | miR-6886-3p | 1 |
| <i>circUSP54</i> | miR-6888-5p | 4 |
| <i>circUSP54</i> | miR-6890-3p | 2 |
| <i>circUSP54</i> | miR-6894-3p | 1 |
| <i>circUSP54</i> | miR-6894-5p | 4 |
| <i>circUSP54</i> | miR-7106-5p | 2 |
| <i>circUSP54</i> | miR-7108-5p | 2 |
| <i>circUSP54</i> | miR-711     | 2 |
| <i>circUSP54</i> | miR-7110-3p | 3 |
| <i>circUSP54</i> | miR-7111-3p | 1 |
| <i>circUSP54</i> | miR-7112-3p | 3 |
| <i>circUSP54</i> | miR-7113-5p | 2 |
| <i>circUSP54</i> | miR-7114-5p | 3 |
| <i>circUSP54</i> | miR-7151-5p | 1 |
| <i>circUSP54</i> | miR-7152-3p | 2 |
| <i>circUSP54</i> | miR-7153-3p | 1 |
| <i>circUSP54</i> | miR-7154-3p | 4 |
| <i>circUSP54</i> | miR-7155-5p | 1 |
| <i>circUSP54</i> | miR-7156-3p | 2 |
| <i>circUSP54</i> | miR-7158-3p | 2 |
| <i>circUSP54</i> | miR-7158-5p | 2 |
| <i>circUSP54</i> | miR-7160-5p | 3 |
| <i>circUSP54</i> | miR-7162-3p | 2 |
| <i>circUSP54</i> | miR-759     | 2 |
| <i>circUSP54</i> | miR-760     | 4 |
| <i>circUSP54</i> | miR-7641    | 2 |
| <i>circUSP54</i> | miR-765     | 4 |
| <i>circUSP54</i> | miR-766-5p  | 4 |
| <i>circUSP54</i> | miR-767-5p  | 1 |
| <i>circUSP54</i> | miR-769-5p  | 4 |
| <i>circUSP54</i> | miR-770-5p  | 1 |
| <i>circUSP54</i> | miR-7849-3p | 1 |
| <i>circUSP54</i> | miR-7852-3p | 3 |
| <i>circUSP54</i> | miR-7855-5p | 2 |
| <i>circUSP54</i> | miR-7973    | 2 |

|                  |                              |   |
|------------------|------------------------------|---|
| <i>circUSP54</i> | miR-7975                     | 3 |
| <i>circUSP54</i> | miR-7976                     | 2 |
| <i>circUSP54</i> | miR-8053                     | 2 |
| <i>circUSP54</i> | miR-8063                     | 2 |
| <i>circUSP54</i> | miR-8066                     | 1 |
| <i>circUSP54</i> | miR-8071                     | 1 |
| <i>circUSP54</i> | miR-8074                     | 1 |
| <i>circUSP54</i> | miR-8077                     | 3 |
| <i>circUSP54</i> | miR-8080                     | 2 |
| <i>circUSP54</i> | miR-8485                     | 2 |
| <i>circUSP54</i> | miR-873-5p.2                 | 2 |
| <i>circUSP54</i> | miR-875-3p                   | 2 |
| <i>circUSP54</i> | miR-875-5p                   | 1 |
| <i>circUSP54</i> | miR-887-5p                   | 1 |
| <i>circUSP54</i> | miR-888-3p                   | 1 |
| <i>circUSP54</i> | miR-892-5p                   | 4 |
| <i>circUSP54</i> | miR-892a                     | 2 |
| <i>circUSP54</i> | miR-892b                     | 4 |
| <i>circUSP54</i> | miR-920/4300/5591-5p/6726-5p | 1 |
| <i>circUSP54</i> | miR-921                      | 2 |
| <i>circUSP54</i> | miR-922                      | 7 |
| <i>circUSP54</i> | miR-924                      | 1 |
| <i>circUSP54</i> | miR-93-3p                    | 4 |
| <i>circUSP54</i> | miR-934                      | 1 |
| <i>circUSP54</i> | miR-935                      | 4 |
| <i>circUSP54</i> | miR-937-5p                   | 3 |
| <i>circUSP54</i> | miR-938                      | 1 |
| <i>circUSP54</i> | miR-939-5p/1343-5p           | 1 |
| <i>circUSP54</i> | miR-942-5p                   | 4 |
| <i>circUSP54</i> | miR-943                      | 4 |
| <i>circUSP54</i> | miR-95-3p                    | 1 |
| <i>circUSP54</i> | miR-96-5p/1271-5p            | 1 |
| <i>circUSP54</i> | let-7a-2-3p/let-7g-3p        | 2 |
| <i>circUSP54</i> | let-7c-3p                    | 2 |
| <i>circUSP54</i> | miR-1179                     | 2 |
| <i>circUSP54</i> | miR-1226-3p                  | 2 |
| <i>circUSP54</i> | miR-1226-5p                  | 2 |
| <i>circUSP54</i> | miR-1227-3p                  | 2 |



|                  |                          |   |
|------------------|--------------------------|---|
| <i>circUSP54</i> | miR-1231                 | 2 |
| <i>circUSP54</i> | miR-124-3p.1             | 3 |
| <i>circUSP54</i> | miR-125-5p               | 2 |
| <i>circUSP54</i> | miR-1250-3p              | 2 |
| <i>circUSP54</i> | miR-1251-3p              | 4 |
| <i>circUSP54</i> | miR-1261                 | 1 |
| <i>circUSP54</i> | miR-1267                 | 2 |
| <i>circUSP54</i> | miR-1273g-5p             | 1 |
| <i>circUSP54</i> | miR-1290                 | 2 |
| <i>circUSP54</i> | miR-1294                 | 4 |
| <i>circUSP54</i> | miR-1299                 | 4 |
| <i>circUSP54</i> | miR-130-3p/301-3p/454-3p | 1 |
| <i>circUSP54</i> | miR-1323                 | 2 |
| <i>circUSP54</i> | miR-1343-3p              | 2 |
| <i>circUSP54</i> | miR-140-5p               | 1 |
| <i>circUSP54</i> | miR-142-3p.1             | 2 |
| <i>circUSP54</i> | miR-142-3p.2             | 2 |
| <i>circUSP54</i> | miR-144-5p               | 1 |
| <i>circUSP54</i> | miR-145-3p               | 1 |
| <i>circUSP54</i> | miR-1468-3p              | 2 |
| <i>circUSP54</i> | miR-148-3p/152-3p        | 1 |
| <i>circUSP54</i> | miR-18-5p                | 1 |
| <i>circUSP54</i> | miR-1910-3p/6511a-5p     | 1 |
| <i>circUSP54</i> | miR-1910-5p              | 2 |
| <i>circUSP54</i> | miR-1914-5p              | 2 |
| <i>circUSP54</i> | miR-197-3p               | 2 |
| <i>circUSP54</i> | miR-200-3p/429           | 2 |
| <i>circUSP54</i> | miR-200ab-5p             | 2 |
| <i>circUSP54</i> | miR-203a-5p              | 1 |
| <i>circUSP54</i> | miR-204-5p/211-5p        | 2 |
| <i>circUSP54</i> | miR-20a-3p               | 1 |
| <i>circUSP54</i> | miR-2113                 | 4 |
| <i>circUSP54</i> | miR-2114-5p              | 6 |
| <i>circUSP54</i> | miR-2115-5p              | 2 |
| <i>circUSP54</i> | miR-219-5p               | 2 |
| <i>circUSP54</i> | miR-219a-1-3p            | 2 |
| <i>circUSP54</i> | miR-219b-5p              | 1 |
| <i>circUSP54</i> | miR-2467-5p              | 2 |

|                  |                                              |   |
|------------------|----------------------------------------------|---|
| <i>circUSP54</i> | miR-26-3p                                    | 3 |
| <i>circUSP54</i> | miR-2681-3p                                  | 2 |
| <i>circUSP54</i> | miR-2682-3p/6781-3p                          | 2 |
| <i>circUSP54</i> | miR-26b-3p                                   | 2 |
| <i>circUSP54</i> | miR-29b-2-5p                                 | 1 |
| <i>circUSP54</i> | miR-302-3p/372-3p/373-3p/520-3p              | 1 |
| <i>circUSP54</i> | miR-3064-5p                                  | 2 |
| <i>circUSP54</i> | miR-3065-5p                                  | 6 |
| <i>circUSP54</i> | miR-3074-5p                                  | 1 |
| <i>circUSP54</i> | miR-30b-3p/1273h-5p/3689-3p/6779-5p/6780a-5p | 1 |
| <i>circUSP54</i> | miR-30c-3p/6788-5p                           | 1 |
| <i>circUSP54</i> | miR-3119                                     | 4 |
| <i>circUSP54</i> | miR-3120-5p                                  | 2 |
| <i>circUSP54</i> | miR-3140-5p                                  | 2 |
| <i>circUSP54</i> | miR-3145-3p                                  | 1 |
| <i>circUSP54</i> | miR-3151-3p                                  | 2 |
| <i>circUSP54</i> | miR-3154                                     | 2 |
| <i>circUSP54</i> | miR-3156-5p                                  | 4 |
| <i>circUSP54</i> | miR-3157-3p                                  | 1 |
| <i>circUSP54</i> | miR-3158-3p                                  | 2 |
| <i>circUSP54</i> | miR-3169                                     | 2 |
| <i>circUSP54</i> | miR-3177-5p                                  | 2 |
| <i>circUSP54</i> | miR-3185                                     | 6 |
| <i>circUSP54</i> | miR-3188                                     | 2 |
| <i>circUSP54</i> | miR-3193                                     | 1 |
| <i>circUSP54</i> | miR-3198/4309                                | 2 |
| <i>circUSP54</i> | miR-3201/4791                                | 1 |
| <i>circUSP54</i> | miR-323a-5p                                  | 1 |
| <i>circUSP54</i> | miR-33-5p                                    | 2 |
| <i>circUSP54</i> | miR-338-5p                                   | 5 |
| <i>circUSP54</i> | miR-33b-3p/515-3p/519e-3p                    | 1 |
| <i>circUSP54</i> | miR-342-3p                                   | 1 |
| <i>circUSP54</i> | miR-345-3p                                   | 2 |
| <i>circUSP54</i> | miR-346                                      | 2 |
| <i>circUSP54</i> | miR-34b-5p/449c-5p                           | 1 |
| <i>circUSP54</i> | miR-3611                                     | 1 |
| <i>circUSP54</i> | miR-3612                                     | 2 |
| <i>circUSP54</i> | miR-3614-5p                                  | 1 |

|                  |                                              |   |
|------------------|----------------------------------------------|---|
| <i>circUSP54</i> | miR-3616-3p                                  | 2 |
| <i>circUSP54</i> | miR-3653-3p                                  | 2 |
| <i>circUSP54</i> | miR-3667-3p                                  | 2 |
| <i>circUSP54</i> | miR-367-5p                                   | 2 |
| <i>circUSP54</i> | miR-3672/6864-3p                             | 3 |
| <i>circUSP54</i> | miR-3677-3p                                  | 2 |
| <i>circUSP54</i> | miR-3680-3p                                  | 7 |
| <i>circUSP54</i> | miR-3680-5p                                  | 1 |
| <i>circUSP54</i> | miR-3688-5p                                  | 1 |
| <i>circUSP54</i> | miR-3714                                     | 3 |
| <i>circUSP54</i> | miR-371a-3p                                  | 1 |
| <i>circUSP54</i> | miR-371b-3p                                  | 1 |
| <i>circUSP54</i> | miR-376b-5p/376c-5p                          | 1 |
| <i>circUSP54</i> | miR-3910                                     | 3 |
| <i>circUSP54</i> | miR-3918                                     | 2 |
| <i>circUSP54</i> | miR-3922-5p                                  | 3 |
| <i>circUSP54</i> | miR-3928-5p/6806-3p                          | 2 |
| <i>circUSP54</i> | miR-3934-3p                                  | 3 |
| <i>circUSP54</i> | miR-3941                                     | 2 |
| <i>circUSP54</i> | miR-3975                                     | 2 |
| <i>circUSP54</i> | miR-3977                                     | 7 |
| <i>circUSP54</i> | miR-409-3p                                   | 2 |
| <i>circUSP54</i> | miR-412-3p/6754-3p                           | 2 |
| <i>circUSP54</i> | miR-421                                      | 7 |
| <i>circUSP54</i> | miR-4256                                     | 3 |
| <i>circUSP54</i> | miR-4260                                     | 4 |
| <i>circUSP54</i> | miR-4272                                     | 4 |
| <i>circUSP54</i> | miR-4280                                     | 2 |
| <i>circUSP54</i> | miR-431-5p                                   | 2 |
| <i>circUSP54</i> | miR-4316                                     | 4 |
| <i>circUSP54</i> | miR-432-5p                                   | 3 |
| <i>circUSP54</i> | miR-4436b-3p/4632-5p/6735-5p/6879-5p/7843-5p | 2 |
| <i>circUSP54</i> | miR-4436b-5p                                 | 2 |
| <i>circUSP54</i> | miR-4440                                     | 2 |
| <i>circUSP54</i> | miR-4443                                     | 2 |
| <i>circUSP54</i> | miR-4445-5p                                  | 2 |
| <i>circUSP54</i> | miR-4446-3p                                  | 2 |
| <i>circUSP54</i> | miR-4457                                     | 1 |

|                  |                     |   |
|------------------|---------------------|---|
| <i>circUSP54</i> | miR-4475            | 2 |
| <i>circUSP54</i> | miR-4477b           | 2 |
| <i>circUSP54</i> | miR-450-5p          | 1 |
| <i>circUSP54</i> | miR-4501            | 1 |
| <i>circUSP54</i> | miR-450a-2-3p       | 4 |
| <i>circUSP54</i> | miR-450b-5p         | 7 |
| <i>circUSP54</i> | miR-4511            | 6 |
| <i>circUSP54</i> | miR-4536-5p         | 2 |
| <i>circUSP54</i> | miR-4540            | 5 |
| <i>circUSP54</i> | miR-455-3p.1        | 2 |
| <i>circUSP54</i> | miR-4653-3p         | 2 |
| <i>circUSP54</i> | miR-4660            | 1 |
| <i>circUSP54</i> | miR-4661-3p         | 2 |
| <i>circUSP54</i> | miR-4666b           | 1 |
| <i>circUSP54</i> | miR-4670-3p         | 4 |
| <i>circUSP54</i> | miR-4672            | 2 |
| <i>circUSP54</i> | miR-4687-3p         | 2 |
| <i>circUSP54</i> | miR-4695-3p         | 1 |
| <i>circUSP54</i> | miR-4712-3p         | 3 |
| <i>circUSP54</i> | miR-4714-3p         | 2 |
| <i>circUSP54</i> | miR-4716-3p/6794-5p | 2 |
| <i>circUSP54</i> | miR-4721            | 2 |
| <i>circUSP54</i> | miR-4727-5p         | 2 |
| <i>circUSP54</i> | miR-4728-3p         | 2 |
| <i>circUSP54</i> | miR-4732-3p         | 2 |
| <i>circUSP54</i> | miR-4733-3p         | 2 |
| <i>circUSP54</i> | miR-4753-5p         | 2 |
| <i>circUSP54</i> | miR-4759            | 2 |
| <i>circUSP54</i> | miR-4761-3p         | 2 |
| <i>circUSP54</i> | miR-4773            | 6 |
| <i>circUSP54</i> | miR-4780            | 2 |
| <i>circUSP54</i> | miR-4781-3p         | 2 |
| <i>circUSP54</i> | miR-4782-5p/5706    | 4 |
| <i>circUSP54</i> | miR-4798-3p         | 1 |
| <i>circUSP54</i> | miR-485-5p          | 2 |
| <i>circUSP54</i> | miR-493-3p          | 1 |
| <i>circUSP54</i> | miR-493-5p          | 2 |
| <i>circUSP54</i> | miR-498             | 2 |

|                  |                                       |   |
|------------------|---------------------------------------|---|
| <i>circUSP54</i> | miR-499a-3p/499b-3p                   | 4 |
| <i>circUSP54</i> | miR-5001-3p                           | 2 |
| <i>circUSP54</i> | miR-5007-5p                           | 1 |
| <i>circUSP54</i> | miR-5008-3p/6737-3p/7157-3p           | 2 |
| <i>circUSP54</i> | miR-500a-3p                           | 2 |
| <i>circUSP54</i> | miR-5010-3p                           | 4 |
| <i>circUSP54</i> | miR-5011-3p                           | 1 |
| <i>circUSP54</i> | miR-505-3p.2                          | 7 |
| <i>circUSP54</i> | miR-507/557                           | 7 |
| <i>circUSP54</i> | miR-508-3p                            | 2 |
| <i>circUSP54</i> | miR-5088-5p                           | 2 |
| <i>circUSP54</i> | miR-5092                              | 2 |
| <i>circUSP54</i> | miR-5100                              | 4 |
| <i>circUSP54</i> | miR-511-5p                            | 2 |
| <i>circUSP54</i> | miR-513b-5p                           | 1 |
| <i>circUSP54</i> | miR-516a-3p/516b-3p/7162-5p           | 2 |
| <i>circUSP54</i> | miR-516b-5p                           | 4 |
| <i>circUSP54</i> | miR-5187-5p                           | 2 |
| <i>circUSP54</i> | miR-519-3p                            | 1 |
| <i>circUSP54</i> | miR-5197-3p                           | 4 |
| <i>circUSP54</i> | miR-526b-5p                           | 2 |
| <i>circUSP54</i> | miR-541-5p                            | 2 |
| <i>circUSP54</i> | miR-545-3p                            | 7 |
| <i>circUSP54</i> | miR-548a-j-5p/548f-5p/548g-5p/548x-5p | 2 |
| <i>circUSP54</i> | miR-548b-3p                           | 6 |
| <i>circUSP54</i> | miR-548c-3p                           | 4 |
| <i>circUSP54</i> | miR-548p                              | 2 |
| <i>circUSP54</i> | miR-550b-2-5p                         | 2 |
| <i>circUSP54</i> | miR-554                               | 3 |
| <i>circUSP54</i> | miR-5572                              | 4 |
| <i>circUSP54</i> | miR-5580-5p                           | 3 |
| <i>circUSP54</i> | miR-5588-3p                           | 6 |
| <i>circUSP54</i> | miR-5691                              | 1 |
| <i>circUSP54</i> | miR-571                               | 2 |
| <i>circUSP54</i> | miR-578                               | 6 |
| <i>circUSP54</i> | miR-600                               | 2 |
| <i>circUSP54</i> | miR-6073                              | 2 |
| <i>circUSP54</i> | miR-6077                              | 2 |

|                  |                             |   |
|------------------|-----------------------------|---|
| <i>circUSP54</i> | miR-615-5p                  | 2 |
| <i>circUSP54</i> | miR-623                     | 2 |
| <i>circUSP54</i> | miR-624-3p                  | 5 |
| <i>circUSP54</i> | miR-628-5p                  | 4 |
| <i>circUSP54</i> | miR-632/4288                | 2 |
| <i>circUSP54</i> | miR-6500-3p                 | 1 |
| <i>circUSP54</i> | miR-6504-3p                 | 2 |
| <i>circUSP54</i> | miR-6509-3p                 | 2 |
| <i>circUSP54</i> | miR-6515-5p                 | 2 |
| <i>circUSP54</i> | miR-6516-5p                 | 3 |
| <i>circUSP54</i> | miR-6723-5p                 | 5 |
| <i>circUSP54</i> | miR-6731-3p                 | 3 |
| <i>circUSP54</i> | miR-6732-5p                 | 2 |
| <i>circUSP54</i> | miR-6734-3p                 | 2 |
| <i>circUSP54</i> | miR-6734-5p                 | 2 |
| <i>circUSP54</i> | miR-6740-5p                 | 6 |
| <i>circUSP54</i> | miR-6750-3p                 | 1 |
| <i>circUSP54</i> | miR-6752-5p/6842-5p/7110-5p | 2 |
| <i>circUSP54</i> | miR-6753-5p                 | 2 |
| <i>circUSP54</i> | miR-6757-5p                 | 2 |
| <i>circUSP54</i> | miR-676-5p                  | 2 |
| <i>circUSP54</i> | miR-6780b-3p                | 2 |
| <i>circUSP54</i> | miR-6787-3p                 | 2 |
| <i>circUSP54</i> | miR-6796-3p                 | 2 |
| <i>circUSP54</i> | miR-6804-3p                 | 2 |
| <i>circUSP54</i> | miR-6804-5p                 | 2 |
| <i>circUSP54</i> | miR-6805-5p                 | 2 |
| <i>circUSP54</i> | miR-6812-3p                 | 1 |
| <i>circUSP54</i> | miR-6815-5p/6865-5p         | 1 |
| <i>circUSP54</i> | miR-6826-5p                 | 7 |
| <i>circUSP54</i> | miR-6834-5p                 | 2 |
| <i>circUSP54</i> | miR-6835-5p                 | 2 |
| <i>circUSP54</i> | miR-6837-3p                 | 2 |
| <i>circUSP54</i> | miR-6838-3p                 | 2 |
| <i>circUSP54</i> | miR-6866-5p                 | 3 |
| <i>circUSP54</i> | miR-6868-3p                 | 2 |
| <i>circUSP54</i> | miR-6871-5p                 | 5 |
| <i>circUSP54</i> | miR-6873-5p                 | 2 |

|                  |                         |   |
|------------------|-------------------------|---|
| <i>circUSP54</i> | miR-6882-5p             | 3 |
| <i>circUSP54</i> | miR-6888-3p             | 4 |
| <i>circUSP54</i> | miR-6889-3p             | 2 |
| <i>circUSP54</i> | miR-7-3p                | 4 |
| <i>circUSP54</i> | miR-7-5p                | 2 |
| <i>circUSP54</i> | miR-7109-3p             | 2 |
| <i>circUSP54</i> | miR-7152-5p             | 1 |
| <i>circUSP54</i> | miR-7159-5p             | 7 |
| <i>circUSP54</i> | miR-7161-3p             | 5 |
| <i>circUSP54</i> | miR-7704                | 2 |
| <i>circUSP54</i> | miR-7848-3p             | 2 |
| <i>circUSP54</i> | miR-7850-5p             | 5 |
| <i>circUSP54</i> | miR-7974                | 2 |
| <i>circUSP54</i> | miR-7977                | 4 |
| <i>circUSP54</i> | miR-8055                | 3 |
| <i>circUSP54</i> | miR-8081                | 3 |
| <i>circUSP54</i> | miR-8083                | 2 |
| <i>circUSP54</i> | miR-8084                | 2 |
| <i>circUSP54</i> | miR-873-3p              | 4 |
| <i>circUSP54</i> | miR-874-3p              | 1 |
| <i>circUSP54</i> | miR-876-3p              | 1 |
| <i>circUSP54</i> | miR-876-5p              | 2 |
| <i>circUSP54</i> | miR-877-5p              | 3 |
| <i>circUSP54</i> | miR-885-3p              | 1 |
| <i>circUSP54</i> | miR-890                 | 1 |
| <i>circUSP54</i> | miR-891a-3p             | 1 |
| <i>circUSP54</i> | miR-940/6808-5p/6893-5p | 1 |
| <i>circUSP54</i> | miR-944                 | 2 |
| <i>circUSP54</i> | miR-95-5p               | 1 |
| <i>circUSP54</i> | miR-96-3p               | 2 |
| <i>circUSP54</i> | miR-99-3p               | 2 |
| <i>circUSP54</i> | miR-2276-3p             | 1 |
| <i>circUSP54</i> | miR-4772-3p             | 1 |
| <i>circVAPB</i>  | let-7-5p/98-5p          | 1 |
| <i>circVAPB</i>  | let-7a-2-3p/let-7g-3p   | 1 |
| <i>circVAPB</i>  | let-7c-3p               | 1 |
| <i>circVAPB</i>  | miR-1-3p/206            | 1 |
| <i>circVAPB</i>  | miR-1-5p                | 2 |

|                  |                     |   |
|------------------|---------------------|---|
| <i>circ VAPB</i> | miR-100-3p          | 1 |
| <i>circ VAPB</i> | miR-101-3p.1        | 1 |
| <i>circ VAPB</i> | miR-101-3p.2        | 2 |
| <i>circ VAPB</i> | miR-105-5p          | 1 |
| <i>circ VAPB</i> | miR-106a-3p         | 1 |
| <i>circ VAPB</i> | miR-1179            | 4 |
| <i>circ VAPB</i> | miR-1180-3p         | 1 |
| <i>circ VAPB</i> | miR-1183            | 2 |
| <i>circ VAPB</i> | miR-1185-5p         | 2 |
| <i>circ VAPB</i> | miR-1197            | 1 |
| <i>circ VAPB</i> | miR-1202/3972       | 1 |
| <i>circ VAPB</i> | miR-1208            | 3 |
| <i>circ VAPB</i> | miR-1224-5p         | 1 |
| <i>circ VAPB</i> | miR-1227-5p         | 1 |
| <i>circ VAPB</i> | miR-1229-3p         | 1 |
| <i>circ VAPB</i> | miR-1231            | 1 |
| <i>circ VAPB</i> | miR-1236-3p         | 1 |
| <i>circ VAPB</i> | miR-1237-3p         | 3 |
| <i>circ VAPB</i> | miR-124-5p          | 3 |
| <i>circ VAPB</i> | miR-1244            | 1 |
| <i>circ VAPB</i> | miR-1245b-3p        | 1 |
| <i>circ VAPB</i> | miR-1246            | 2 |
| <i>circ VAPB</i> | miR-1248            | 3 |
| <i>circ VAPB</i> | miR-1249-5p/6797-5p | 2 |
| <i>circ VAPB</i> | miR-1250-3p         | 2 |
| <i>circ VAPB</i> | miR-1252-3p         | 3 |
| <i>circ VAPB</i> | miR-1253            | 1 |
| <i>circ VAPB</i> | miR-1254/3116       | 1 |
| <i>circ VAPB</i> | miR-1255a/1255b-5p  | 2 |
| <i>circ VAPB</i> | miR-1255b-2-3p      | 1 |
| <i>circ VAPB</i> | miR-1258            | 1 |
| <i>circ VAPB</i> | miR-126-5p          | 2 |
| <i>circ VAPB</i> | miR-1260a/1260b     | 1 |
| <i>circ VAPB</i> | miR-1261            | 3 |
| <i>circ VAPB</i> | miR-1265            | 2 |
| <i>circ VAPB</i> | miR-1266-5p/4518    | 2 |
| <i>circ VAPB</i> | miR-1269            | 1 |
| <i>circ VAPB</i> | miR-127-5p          | 1 |



|                  |                     |   |
|------------------|---------------------|---|
| <i>circ VAPB</i> | miR-1270            | 1 |
| <i>circ VAPB</i> | miR-1273e           | 2 |
| <i>circ VAPB</i> | miR-1273g-3p        | 1 |
| <i>circ VAPB</i> | miR-1273g-5p        | 1 |
| <i>circ VAPB</i> | miR-1275/4665-5p    | 1 |
| <i>circ VAPB</i> | miR-1276            | 2 |
| <i>circ VAPB</i> | miR-1277-5p         | 1 |
| <i>circ VAPB</i> | miR-1278            | 1 |
| <i>circ VAPB</i> | miR-128-3p          | 2 |
| <i>circ VAPB</i> | miR-1285-5p         | 2 |
| <i>circ VAPB</i> | miR-1286            | 1 |
| <i>circ VAPB</i> | miR-1287-3p         | 1 |
| <i>circ VAPB</i> | miR-1290            | 2 |
| <i>circ VAPB</i> | miR-1291/6775-3p    | 2 |
| <i>circ VAPB</i> | miR-1294            | 1 |
| <i>circ VAPB</i> | miR-1295a           | 1 |
| <i>circ VAPB</i> | miR-1296-3p         | 1 |
| <i>circ VAPB</i> | miR-1298-3p         | 1 |
| <i>circ VAPB</i> | miR-1298-5p         | 2 |
| <i>circ VAPB</i> | miR-1299            | 1 |
| <i>circ VAPB</i> | miR-1301-3p         | 2 |
| <i>circ VAPB</i> | miR-1301-5p/6502-5p | 1 |
| <i>circ VAPB</i> | miR-1304-5p         | 1 |
| <i>circ VAPB</i> | miR-1305            | 3 |
| <i>circ VAPB</i> | miR-130b-5p         | 1 |
| <i>circ VAPB</i> | miR-132-3p/212-3p   | 1 |
| <i>circ VAPB</i> | miR-1324            | 1 |
| <i>circ VAPB</i> | miR-135-5p          | 1 |
| <i>circ VAPB</i> | miR-135a-3p         | 1 |
| <i>circ VAPB</i> | miR-137             | 2 |
| <i>circ VAPB</i> | miR-138-1-3p        | 1 |
| <i>circ VAPB</i> | miR-139-5p          | 1 |
| <i>circ VAPB</i> | miR-140-3p.1        | 2 |
| <i>circ VAPB</i> | miR-140-3p.2        | 1 |
| <i>circ VAPB</i> | miR-140-5p          | 1 |
| <i>circ VAPB</i> | miR-141-3p/200-3p   | 1 |
| <i>circ VAPB</i> | miR-141-5p          | 3 |
| <i>circ VAPB</i> | miR-142-5p          | 3 |

|                  |                                      |   |
|------------------|--------------------------------------|---|
| <i>circ VAPB</i> | miR-143-5p                           | 2 |
| <i>circ VAPB</i> | miR-144-3p                           | 1 |
| <i>circ VAPB</i> | miR-144-5p                           | 1 |
| <i>circ VAPB</i> | miR-145-3p                           | 2 |
| <i>circ VAPB</i> | miR-146-5p                           | 1 |
| <i>circ VAPB</i> | miR-146a-3p                          | 2 |
| <i>circ VAPB</i> | miR-146b-3p                          | 1 |
| <i>circ VAPB</i> | miR-1470                             | 1 |
| <i>circ VAPB</i> | miR-148a-5p                          | 1 |
| <i>circ VAPB</i> | miR-148b-5p/6874-3p                  | 1 |
| <i>circ VAPB</i> | miR-149-3p/4728-5p/6785-5p/6883-5p   | 2 |
| <i>circ VAPB</i> | miR-15-5p/16-5p/195-5p/424-5p/497-5p | 1 |
| <i>circ VAPB</i> | miR-153-5p                           | 1 |
| <i>circ VAPB</i> | miR-15a-3p                           | 1 |
| <i>circ VAPB</i> | miR-16-1-3p                          | 1 |
| <i>circ VAPB</i> | miR-16-2-3p/195-3p                   | 1 |
| <i>circ VAPB</i> | miR-18-5p                            | 1 |
| <i>circ VAPB</i> | miR-181-5p                           | 3 |
| <i>circ VAPB</i> | miR-181a-2-3p                        | 1 |
| <i>circ VAPB</i> | miR-181a-3p                          | 1 |
| <i>circ VAPB</i> | miR-185-5p                           | 1 |
| <i>circ VAPB</i> | miR-186-5p                           | 4 |
| <i>circ VAPB</i> | miR-187-5p                           | 1 |
| <i>circ VAPB</i> | miR-188-3p                           | 1 |
| <i>circ VAPB</i> | miR-188-5p                           | 1 |
| <i>circ VAPB</i> | miR-18b-3p                           | 1 |
| <i>circ VAPB</i> | miR-19-3p                            | 1 |
| <i>circ VAPB</i> | miR-19-5p                            | 5 |
| <i>circ VAPB</i> | miR-1911-3p                          | 2 |
| <i>circ VAPB</i> | miR-1914-5p                          | 2 |
| <i>circ VAPB</i> | miR-1915-3p/6764-5p                  | 1 |
| <i>circ VAPB</i> | miR-1915-5p                          | 2 |
| <i>circ VAPB</i> | miR-192-3p                           | 2 |
| <i>circ VAPB</i> | miR-192-5p/215-5p                    | 1 |
| <i>circ VAPB</i> | miR-194-3p                           | 2 |
| <i>circ VAPB</i> | miR-196-5p                           | 2 |
| <i>circ VAPB</i> | miR-196a-3p                          | 2 |
| <i>circ VAPB</i> | miR-196b-3p                          | 1 |

|                  |                                     |   |
|------------------|-------------------------------------|---|
| <i>circ VAPB</i> | miR-197-3p                          | 1 |
| <i>circ VAPB</i> | miR-197-5p/3132                     | 1 |
| <i>circ VAPB</i> | miR-1972                            | 1 |
| <i>circ VAPB</i> | miR-200-3p/429                      | 2 |
| <i>circ VAPB</i> | miR-200ab-5p                        | 1 |
| <i>circ VAPB</i> | miR-203a-3p.1                       | 1 |
| <i>circ VAPB</i> | miR-203a-5p                         | 1 |
| <i>circ VAPB</i> | miR-203b-3p                         | 5 |
| <i>circ VAPB</i> | miR-203b-5p/6718-5p                 | 1 |
| <i>circ VAPB</i> | miR-204-3p/4646-5p                  | 3 |
| <i>circ VAPB</i> | miR-205-3p                          | 4 |
| <i>circ VAPB</i> | miR-2052                            | 5 |
| <i>circ VAPB</i> | miR-2053                            | 2 |
| <i>circ VAPB</i> | miR-2054                            | 2 |
| <i>circ VAPB</i> | miR-20a-3p                          | 1 |
| <i>circ VAPB</i> | miR-21-3p/3591-3p                   | 3 |
| <i>circ VAPB</i> | miR-21-5p/590-5p                    | 2 |
| <i>circ VAPB</i> | miR-211-3p                          | 1 |
| <i>circ VAPB</i> | miR-2115-3p                         | 1 |
| <i>circ VAPB</i> | miR-2115-5p                         | 2 |
| <i>circ VAPB</i> | miR-2117                            | 3 |
| <i>circ VAPB</i> | miR-214-3p/3619-5p                  | 1 |
| <i>circ VAPB</i> | miR-215-3p                          | 2 |
| <i>circ VAPB</i> | miR-216a-5p                         | 1 |
| <i>circ VAPB</i> | miR-216b-3p                         | 2 |
| <i>circ VAPB</i> | miR-216b-5p                         | 1 |
| <i>circ VAPB</i> | miR-223-3p                          | 1 |
| <i>circ VAPB</i> | miR-224-5p                          | 1 |
| <i>circ VAPB</i> | miR-2276-3p                         | 1 |
| <i>circ VAPB</i> | miR-2276-5p                         | 2 |
| <i>circ VAPB</i> | miR-2277-3p                         | 1 |
| <i>circ VAPB</i> | miR-2278                            | 1 |
| <i>circ VAPB</i> | miR-23-3p                           | 2 |
| <i>circ VAPB</i> | miR-2355-5p                         | 1 |
| <i>circ VAPB</i> | miR-2467-5p                         | 3 |
| <i>circ VAPB</i> | miR-25-3p/32-5p/92-3p/363-3p/367-3p | 1 |
| <i>circ VAPB</i> | miR-2681-3p                         | 3 |
| <i>circ VAPB</i> | miR-2682-3p/6781-3p                 | 4 |

|                  |                                              |   |
|------------------|----------------------------------------------|---|
| <i>circ VAPB</i> | miR-26b-3p                                   | 1 |
| <i>circ VAPB</i> | miR-27-3p                                    | 4 |
| <i>circ VAPB</i> | miR-296-5p                                   | 1 |
| <i>circ VAPB</i> | miR-298                                      | 2 |
| <i>circ VAPB</i> | miR-299-3p                                   | 2 |
| <i>circ VAPB</i> | miR-299-5p                                   | 2 |
| <i>circ VAPB</i> | miR-29a-5p                                   | 1 |
| <i>circ VAPB</i> | miR-29b-1-5p                                 | 1 |
| <i>circ VAPB</i> | miR-29b-2-5p                                 | 3 |
| <i>circ VAPB</i> | miR-30-3p                                    | 2 |
| <i>circ VAPB</i> | miR-301a-5p/301b-5p                          | 2 |
| <i>circ VAPB</i> | miR-302a-5p                                  | 2 |
| <i>circ VAPB</i> | miR-302c-5p                                  | 2 |
| <i>circ VAPB</i> | miR-3064-3p                                  | 2 |
| <i>circ VAPB</i> | miR-3064-5p                                  | 1 |
| <i>circ VAPB</i> | miR-3065-3p                                  | 1 |
| <i>circ VAPB</i> | miR-3074-3p                                  | 1 |
| <i>circ VAPB</i> | miR-3074-5p                                  | 2 |
| <i>circ VAPB</i> | miR-30b-3p/1273h-5p/3689-3p/6779-5p/6780a-5p | 1 |
| <i>circ VAPB</i> | miR-30c-3p/6788-5p                           | 1 |
| <i>circ VAPB</i> | miR-31-3p                                    | 1 |
| <i>circ VAPB</i> | miR-3117-5p                                  | 2 |
| <i>circ VAPB</i> | miR-3120-3p                                  | 2 |
| <i>circ VAPB</i> | miR-3120-5p                                  | 2 |
| <i>circ VAPB</i> | miR-3121-5p                                  | 2 |
| <i>circ VAPB</i> | miR-3122/3913-5p                             | 2 |
| <i>circ VAPB</i> | miR-3123                                     | 2 |
| <i>circ VAPB</i> | miR-3124-3p                                  | 1 |
| <i>circ VAPB</i> | miR-3125/3916/6859-5p                        | 1 |
| <i>circ VAPB</i> | miR-3126-3p                                  | 1 |
| <i>circ VAPB</i> | miR-3126-5p                                  | 2 |
| <i>circ VAPB</i> | miR-3127-3p/6756-3p                          | 1 |
| <i>circ VAPB</i> | miR-3127-5p                                  | 2 |
| <i>circ VAPB</i> | miR-3128                                     | 2 |
| <i>circ VAPB</i> | miR-3130-3p                                  | 1 |
| <i>circ VAPB</i> | miR-3133                                     | 4 |
| <i>circ VAPB</i> | miR-3135a                                    | 1 |
| <i>circ VAPB</i> | miR-3136-3p/7155-3p                          | 1 |

|                  |                          |   |
|------------------|--------------------------|---|
| <i>circ VAPB</i> | miR-3138                 | 1 |
| <i>circ VAPB</i> | miR-3141                 | 1 |
| <i>circ VAPB</i> | miR-3144-3p              | 1 |
| <i>circ VAPB</i> | miR-3145-3p              | 1 |
| <i>circ VAPB</i> | miR-3145-5p              | 1 |
| <i>circ VAPB</i> | miR-3148                 | 3 |
| <i>circ VAPB</i> | miR-3150a-5p/3150b-5p    | 1 |
| <i>circ VAPB</i> | miR-3151-5p              | 1 |
| <i>circ VAPB</i> | miR-3152-5p              | 1 |
| <i>circ VAPB</i> | miR-3153/6733-5p/6739-5p | 3 |
| <i>circ VAPB</i> | miR-3156-3p              | 1 |
| <i>circ VAPB</i> | miR-3157-3p              | 1 |
| <i>circ VAPB</i> | miR-3158-3p              | 1 |
| <i>circ VAPB</i> | miR-3159                 | 3 |
| <i>circ VAPB</i> | miR-3160-3p              | 1 |
| <i>circ VAPB</i> | miR-3160-5p              | 2 |
| <i>circ VAPB</i> | miR-3161                 | 1 |
| <i>circ VAPB</i> | miR-3162-3p              | 1 |
| <i>circ VAPB</i> | miR-3162-5p              | 1 |
| <i>circ VAPB</i> | miR-3163                 | 3 |
| <i>circ VAPB</i> | miR-3166                 | 1 |
| <i>circ VAPB</i> | miR-3168                 | 1 |
| <i>circ VAPB</i> | miR-3170/6855-5p         | 1 |
| <i>circ VAPB</i> | miR-3171                 | 1 |
| <i>circ VAPB</i> | miR-3173-5p              | 1 |
| <i>circ VAPB</i> | miR-3174                 | 1 |
| <i>circ VAPB</i> | miR-3179                 | 1 |
| <i>circ VAPB</i> | miR-3180-5p              | 1 |
| <i>circ VAPB</i> | miR-3181                 | 1 |
| <i>circ VAPB</i> | miR-3182                 | 1 |
| <i>circ VAPB</i> | miR-3185                 | 2 |
| <i>circ VAPB</i> | miR-3187-3p              | 1 |
| <i>circ VAPB</i> | miR-3188                 | 3 |
| <i>circ VAPB</i> | miR-3189-5p              | 2 |
| <i>circ VAPB</i> | miR-3191-5p              | 2 |
| <i>circ VAPB</i> | miR-3192-3p              | 1 |
| <i>circ VAPB</i> | miR-3192-5p              | 3 |
| <i>circ VAPB</i> | miR-3193                 | 1 |

|                  |                   |   |
|------------------|-------------------|---|
| <i>circ VAPB</i> | miR-320           | 1 |
| <i>circ VAPB</i> | miR-3200-3p       | 2 |
| <i>circ VAPB</i> | miR-3200-5p       | 1 |
| <i>circ VAPB</i> | miR-3201/4791     | 2 |
| <i>circ VAPB</i> | miR-320e          | 1 |
| <i>circ VAPB</i> | miR-329-3p/362-3p | 2 |
| <i>circ VAPB</i> | miR-330-3p.2      | 2 |
| <i>circ VAPB</i> | miR-331-3p        | 1 |
| <i>circ VAPB</i> | miR-335-3p        | 2 |
| <i>circ VAPB</i> | miR-335-5p        | 2 |
| <i>circ VAPB</i> | miR-339-5p        | 1 |
| <i>circ VAPB</i> | miR-33a-3p        | 2 |
| <i>circ VAPB</i> | miR-340-5p        | 2 |
| <i>circ VAPB</i> | miR-342-3p        | 1 |
| <i>circ VAPB</i> | miR-345-5p        | 2 |
| <i>circ VAPB</i> | miR-346           | 1 |
| <i>circ VAPB</i> | miR-34a-3p        | 2 |
| <i>circ VAPB</i> | miR-34b-3p        | 1 |
| <i>circ VAPB</i> | miR-34c-3p        | 1 |
| <i>circ VAPB</i> | miR-3529-3p       | 2 |
| <i>circ VAPB</i> | miR-3591-5p       | 1 |
| <i>circ VAPB</i> | miR-3605-5p       | 2 |
| <i>circ VAPB</i> | miR-3607-3p       | 2 |
| <i>circ VAPB</i> | miR-3607-5p       | 2 |
| <i>circ VAPB</i> | miR-361-5p        | 1 |
| <i>circ VAPB</i> | miR-3611          | 2 |
| <i>circ VAPB</i> | miR-3612          | 2 |
| <i>circ VAPB</i> | miR-3613-3p       | 1 |
| <i>circ VAPB</i> | miR-3614-3p       | 1 |
| <i>circ VAPB</i> | miR-3616-3p       | 3 |
| <i>circ VAPB</i> | miR-3617-3p       | 2 |
| <i>circ VAPB</i> | miR-3622b-5p      | 1 |
| <i>circ VAPB</i> | miR-3646          | 3 |
| <i>circ VAPB</i> | miR-3655          | 1 |
| <i>circ VAPB</i> | miR-3660/4526     | 1 |
| <i>circ VAPB</i> | miR-3662          | 4 |
| <i>circ VAPB</i> | miR-3663-5p       | 1 |
| <i>circ VAPB</i> | miR-3664-3p       | 2 |

|                  |                     |   |
|------------------|---------------------|---|
| <i>circ VAPB</i> | miR-3667-3p         | 2 |
| <i>circ VAPB</i> | miR-3671            | 1 |
| <i>circ VAPB</i> | miR-3672/6864-3p    | 1 |
| <i>circ VAPB</i> | miR-3675-5p         | 2 |
| <i>circ VAPB</i> | miR-3679-3p         | 1 |
| <i>circ VAPB</i> | miR-3680-3p         | 1 |
| <i>circ VAPB</i> | miR-3681-5p         | 2 |
| <i>circ VAPB</i> | miR-3682-5p         | 2 |
| <i>circ VAPB</i> | miR-3688-3p         | 1 |
| <i>circ VAPB</i> | miR-3688-5p         | 1 |
| <i>circ VAPB</i> | miR-3690            | 1 |
| <i>circ VAPB</i> | miR-3691-3p         | 1 |
| <i>circ VAPB</i> | miR-3691-5p         | 2 |
| <i>circ VAPB</i> | miR-3692-5p         | 2 |
| <i>circ VAPB</i> | miR-374-5p          | 2 |
| <i>circ VAPB</i> | miR-374-5p/655-3p   | 1 |
| <i>circ VAPB</i> | miR-374a-3p         | 2 |
| <i>circ VAPB</i> | miR-374b-3p         | 2 |
| <i>circ VAPB</i> | miR-374c-3p         | 1 |
| <i>circ VAPB</i> | miR-376b-5p/376c-5p | 3 |
| <i>circ VAPB</i> | miR-376c-3p         | 1 |
| <i>circ VAPB</i> | miR-379-5p          | 1 |
| <i>circ VAPB</i> | miR-380-5p/563      | 2 |
| <i>circ VAPB</i> | miR-382-3p          | 4 |
| <i>circ VAPB</i> | miR-383-3p          | 1 |
| <i>circ VAPB</i> | miR-3913-3p         | 2 |
| <i>circ VAPB</i> | miR-3915            | 1 |
| <i>circ VAPB</i> | miR-3918            | 3 |
| <i>circ VAPB</i> | miR-3919            | 2 |
| <i>circ VAPB</i> | miR-3920            | 1 |
| <i>circ VAPB</i> | miR-3921/4653-5p    | 2 |
| <i>circ VAPB</i> | miR-3922-5p         | 1 |
| <i>circ VAPB</i> | miR-3925-3p         | 2 |
| <i>circ VAPB</i> | miR-3925-5p         | 2 |
| <i>circ VAPB</i> | miR-3927-3p/6831-5p | 2 |
| <i>circ VAPB</i> | miR-3927-5p         | 1 |
| <i>circ VAPB</i> | miR-3928-5p/6806-3p | 2 |
| <i>circ VAPB</i> | miR-3929/4419b/4478 | 3 |

|                  |                           |   |
|------------------|---------------------------|---|
| <i>circ VAPB</i> | miR-3934-3p               | 1 |
| <i>circ VAPB</i> | miR-3935                  | 1 |
| <i>circ VAPB</i> | miR-3936                  | 2 |
| <i>circ VAPB</i> | miR-3941                  | 1 |
| <i>circ VAPB</i> | miR-3942-3p               | 2 |
| <i>circ VAPB</i> | miR-3944-3p               | 1 |
| <i>circ VAPB</i> | miR-3945                  | 1 |
| <i>circ VAPB</i> | miR-3973                  | 1 |
| <i>circ VAPB</i> | miR-3974                  | 1 |
| <i>circ VAPB</i> | miR-3975                  | 3 |
| <i>circ VAPB</i> | miR-410-3p                | 2 |
| <i>circ VAPB</i> | miR-412-3p/6754-3p        | 2 |
| <i>circ VAPB</i> | miR-421                   | 2 |
| <i>circ VAPB</i> | miR-425-5p                | 1 |
| <i>circ VAPB</i> | miR-4251                  | 2 |
| <i>circ VAPB</i> | miR-4253/6862-5p          | 1 |
| <i>circ VAPB</i> | miR-4254                  | 1 |
| <i>circ VAPB</i> | miR-4255                  | 1 |
| <i>circ VAPB</i> | miR-4257                  | 1 |
| <i>circ VAPB</i> | miR-4261                  | 1 |
| <i>circ VAPB</i> | miR-4264                  | 1 |
| <i>circ VAPB</i> | miR-4266                  | 1 |
| <i>circ VAPB</i> | miR-4267                  | 1 |
| <i>circ VAPB</i> | miR-4268                  | 1 |
| <i>circ VAPB</i> | miR-4269/6715b-5p         | 1 |
| <i>circ VAPB</i> | miR-4270/4441/6754-5p     | 2 |
| <i>circ VAPB</i> | miR-4271/4725-3p/6780b-5p | 1 |
| <i>circ VAPB</i> | miR-4272                  | 3 |
| <i>circ VAPB</i> | miR-4273/7156-5p          | 2 |
| <i>circ VAPB</i> | miR-4275                  | 1 |
| <i>circ VAPB</i> | miR-4276                  | 2 |
| <i>circ VAPB</i> | miR-4279                  | 3 |
| <i>circ VAPB</i> | miR-4282                  | 1 |
| <i>circ VAPB</i> | miR-4283                  | 1 |
| <i>circ VAPB</i> | miR-4286                  | 1 |
| <i>circ VAPB</i> | miR-4290                  | 1 |
| <i>circ VAPB</i> | miR-4291                  | 3 |
| <i>circ VAPB</i> | miR-4301                  | 2 |



|                  |                                               |   |
|------------------|-----------------------------------------------|---|
| <i>circ VAPB</i> | miR-4302                                      | 2 |
| <i>circ VAPB</i> | miR-4307                                      | 2 |
| <i>circ VAPB</i> | miR-4310/7157-5p                              | 1 |
| <i>circ VAPB</i> | miR-4311                                      | 2 |
| <i>circ VAPB</i> | miR-4316                                      | 1 |
| <i>circ VAPB</i> | miR-4325                                      | 2 |
| <i>circ VAPB</i> | miR-4328                                      | 1 |
| <i>circ VAPB</i> | miR-4329                                      | 2 |
| <i>circ VAPB</i> | miR-433-3p                                    | 1 |
| <i>circ VAPB</i> | miR-4330                                      | 2 |
| <i>circ VAPB</i> | miR-4419a/4510/6127/6129/6130/6133            | 2 |
| <i>circ VAPB</i> | miR-4422                                      | 2 |
| <i>circ VAPB</i> | miR-4426/4647/4662b                           | 1 |
| <i>circ VAPB</i> | miR-4435                                      | 1 |
| <i>circ VAPB</i> | miR-4436b-3p/4632-5p/6735-5p/6879-5p/67843-5p | 2 |
| <i>circ VAPB</i> | miR-4436b-5p                                  | 1 |
| <i>circ VAPB</i> | miR-4437                                      | 1 |
| <i>circ VAPB</i> | miR-4438                                      | 1 |
| <i>circ VAPB</i> | miR-4443                                      | 1 |
| <i>circ VAPB</i> | miR-4446-3p                                   | 1 |
| <i>circ VAPB</i> | miR-4446-5p                                   | 2 |
| <i>circ VAPB</i> | miR-4447/4472                                 | 1 |
| <i>circ VAPB</i> | miR-4448                                      | 1 |
| <i>circ VAPB</i> | miR-4450                                      | 1 |
| <i>circ VAPB</i> | miR-4451                                      | 1 |
| <i>circ VAPB</i> | miR-4453/4538                                 | 1 |
| <i>circ VAPB</i> | miR-4457                                      | 1 |
| <i>circ VAPB</i> | miR-4460                                      | 2 |
| <i>circ VAPB</i> | miR-4470                                      | 2 |
| <i>circ VAPB</i> | miR-4474-3p                                   | 1 |
| <i>circ VAPB</i> | miR-4475                                      | 1 |
| <i>circ VAPB</i> | miR-4477a                                     | 2 |
| <i>circ VAPB</i> | miR-4480                                      | 1 |
| <i>circ VAPB</i> | miR-4484                                      | 2 |
| <i>circ VAPB</i> | miR-4487                                      | 1 |
| <i>circ VAPB</i> | miR-4489                                      | 1 |
| <i>circ VAPB</i> | miR-4491/4657                                 | 2 |
| <i>circ VAPB</i> | miR-4495                                      | 1 |

|                  |                       |   |
|------------------|-----------------------|---|
| <i>circ VAPB</i> | miR-4496              | 2 |
| <i>circ VAPB</i> | miR-4501              | 1 |
| <i>circ VAPB</i> | miR-4504              | 1 |
| <i>circ VAPB</i> | miR-4506              | 2 |
| <i>circ VAPB</i> | miR-4509              | 1 |
| <i>circ VAPB</i> | miR-450a-1-3p         | 2 |
| <i>circ VAPB</i> | miR-450b-3p/769-3p    | 2 |
| <i>circ VAPB</i> | miR-450b-5p           | 1 |
| <i>circ VAPB</i> | miR-4511              | 2 |
| <i>circ VAPB</i> | miR-4512              | 1 |
| <i>circ VAPB</i> | miR-4514/4692         | 1 |
| <i>circ VAPB</i> | miR-452-3p            | 1 |
| <i>circ VAPB</i> | miR-452-5p/892-3p     | 2 |
| <i>circ VAPB</i> | miR-4520-3p           | 1 |
| <i>circ VAPB</i> | miR-4524a-3p          | 1 |
| <i>circ VAPB</i> | miR-4524b-3p          | 1 |
| <i>circ VAPB</i> | miR-4529-5p           | 1 |
| <i>circ VAPB</i> | miR-4531              | 1 |
| <i>circ VAPB</i> | miR-4536-5p           | 2 |
| <i>circ VAPB</i> | miR-4539              | 2 |
| <i>circ VAPB</i> | miR-455-3p.2          | 2 |
| <i>circ VAPB</i> | miR-4635              | 3 |
| <i>circ VAPB</i> | miR-4639-3p           | 2 |
| <i>circ VAPB</i> | miR-4643              | 3 |
| <i>circ VAPB</i> | miR-4645-5p/4673      | 2 |
| <i>circ VAPB</i> | miR-4649-3p           | 1 |
| <i>circ VAPB</i> | miR-4649-5p/6729-5p   | 1 |
| <i>circ VAPB</i> | miR-4650-3p           | 1 |
| <i>circ VAPB</i> | miR-4650-5p           | 1 |
| <i>circ VAPB</i> | miR-4652-3p           | 3 |
| <i>circ VAPB</i> | miR-4656              | 2 |
| <i>circ VAPB</i> | miR-4659a-3p/4659b-3p | 4 |
| <i>circ VAPB</i> | miR-4660              | 1 |
| <i>circ VAPB</i> | miR-4661-3p           | 1 |
| <i>circ VAPB</i> | miR-4662-5p           | 1 |
| <i>circ VAPB</i> | miR-4663              | 3 |
| <i>circ VAPB</i> | miR-4664-3p           | 1 |
| <i>circ VAPB</i> | miR-4666b             | 1 |

|                  |                     |   |
|------------------|---------------------|---|
| <i>circ VAPB</i> | miR-4667-3p         | 1 |
| <i>circ VAPB</i> | miR-4668-3p         | 2 |
| <i>circ VAPB</i> | miR-4668-5p         | 3 |
| <i>circ VAPB</i> | miR-4670-3p         | 2 |
| <i>circ VAPB</i> | miR-4672            | 1 |
| <i>circ VAPB</i> | miR-4675/4741       | 2 |
| <i>circ VAPB</i> | miR-4677-3p         | 2 |
| <i>circ VAPB</i> | miR-4677-5p         | 2 |
| <i>circ VAPB</i> | miR-4679            | 2 |
| <i>circ VAPB</i> | miR-4680-5p         | 2 |
| <i>circ VAPB</i> | miR-4685-5p/6837-5p | 1 |
| <i>circ VAPB</i> | miR-4687-3p         | 1 |
| <i>circ VAPB</i> | miR-4689/6858-5p    | 1 |
| <i>circ VAPB</i> | miR-4691-5p/6792-3p | 2 |
| <i>circ VAPB</i> | miR-4693-5p         | 3 |
| <i>circ VAPB</i> | miR-4694-3p         | 2 |
| <i>circ VAPB</i> | miR-4694-5p         | 3 |
| <i>circ VAPB</i> | miR-4695-5p         | 1 |
| <i>circ VAPB</i> | miR-4697-3p         | 1 |
| <i>circ VAPB</i> | miR-4699-3p         | 1 |
| <i>circ VAPB</i> | miR-4700-3p         | 1 |
| <i>circ VAPB</i> | miR-4703-3p         | 1 |
| <i>circ VAPB</i> | miR-4704-3p         | 1 |
| <i>circ VAPB</i> | miR-4704-5p         | 2 |
| <i>circ VAPB</i> | miR-4705            | 1 |
| <i>circ VAPB</i> | miR-4708-3p         | 1 |
| <i>circ VAPB</i> | miR-4709-3p         | 1 |
| <i>circ VAPB</i> | miR-4709-5p         | 3 |
| <i>circ VAPB</i> | miR-4711-3p         | 1 |
| <i>circ VAPB</i> | miR-4712-3p         | 2 |
| <i>circ VAPB</i> | miR-4713-3p         | 1 |
| <i>circ VAPB</i> | miR-4713-5p         | 1 |
| <i>circ VAPB</i> | miR-4714-3p         | 3 |
| <i>circ VAPB</i> | miR-4715-3p         | 1 |
| <i>circ VAPB</i> | miR-4716-5p         | 1 |
| <i>circ VAPB</i> | miR-4717-3p         | 2 |
| <i>circ VAPB</i> | miR-4717-5p         | 2 |
| <i>circ VAPB</i> | miR-4719            | 3 |

|                  |                             |   |
|------------------|-----------------------------|---|
| <i>circ VAPB</i> | miR-4720-5p/4799-3p/5588-5p | 2 |
| <i>circ VAPB</i> | miR-4721                    | 3 |
| <i>circ VAPB</i> | miR-4722-3p/6727-3p         | 2 |
| <i>circ VAPB</i> | miR-4722-5p                 | 1 |
| <i>circ VAPB</i> | miR-4724-3p                 | 1 |
| <i>circ VAPB</i> | miR-4726-3p                 | 1 |
| <i>circ VAPB</i> | miR-4727-3p                 | 2 |
| <i>circ VAPB</i> | miR-4728-3p                 | 3 |
| <i>circ VAPB</i> | miR-4729                    | 1 |
| <i>circ VAPB</i> | miR-4731-3p/4801            | 2 |
| <i>circ VAPB</i> | miR-4731-5p                 | 1 |
| <i>circ VAPB</i> | miR-4739                    | 2 |
| <i>circ VAPB</i> | miR-4742-5p                 | 1 |
| <i>circ VAPB</i> | miR-4743-3p                 | 3 |
| <i>circ VAPB</i> | miR-4744                    | 1 |
| <i>circ VAPB</i> | miR-4747-3p                 | 3 |
| <i>circ VAPB</i> | miR-4747-5p/5196-5p         | 4 |
| <i>circ VAPB</i> | miR-4750-3p                 | 1 |
| <i>circ VAPB</i> | miR-4750-5p                 | 1 |
| <i>circ VAPB</i> | miR-4752                    | 2 |
| <i>circ VAPB</i> | miR-4753-5p                 | 2 |
| <i>circ VAPB</i> | miR-4755-3p                 | 2 |
| <i>circ VAPB</i> | miR-4755-5p/5006-3p         | 1 |
| <i>circ VAPB</i> | miR-4756-3p                 | 2 |
| <i>circ VAPB</i> | miR-4758-3p                 | 2 |
| <i>circ VAPB</i> | miR-4760-3p                 | 2 |
| <i>circ VAPB</i> | miR-4761-3p                 | 6 |
| <i>circ VAPB</i> | miR-4762-5p                 | 1 |
| <i>circ VAPB</i> | miR-4764-5p                 | 1 |
| <i>circ VAPB</i> | miR-4768-5p/6833-3p         | 2 |
| <i>circ VAPB</i> | miR-4769-3p/6817-5p         | 2 |
| <i>circ VAPB</i> | miR-4771                    | 1 |
| <i>circ VAPB</i> | miR-4772-3p                 | 1 |
| <i>circ VAPB</i> | miR-4774-3p                 | 1 |
| <i>circ VAPB</i> | miR-4775                    | 3 |
| <i>circ VAPB</i> | miR-4776-3p                 | 2 |
| <i>circ VAPB</i> | miR-4778-3p                 | 2 |
| <i>circ VAPB</i> | miR-4779                    | 1 |

|                  |                     |   |
|------------------|---------------------|---|
| <i>circ VAPB</i> | miR-4782-5p/5706    | 1 |
| <i>circ VAPB</i> | miR-4786-3p         | 1 |
| <i>circ VAPB</i> | miR-4789-3p         | 3 |
| <i>circ VAPB</i> | miR-4790-3p         | 1 |
| <i>circ VAPB</i> | miR-4793-3p         | 1 |
| <i>circ VAPB</i> | miR-4797-3p         | 1 |
| <i>circ VAPB</i> | miR-4797-5p         | 2 |
| <i>circ VAPB</i> | miR-4799-5p         | 2 |
| <i>circ VAPB</i> | miR-4800-5p         | 1 |
| <i>circ VAPB</i> | miR-4803            | 1 |
| <i>circ VAPB</i> | miR-484/3155        | 1 |
| <i>circ VAPB</i> | miR-485-5p          | 3 |
| <i>circ VAPB</i> | miR-488-3p          | 3 |
| <i>circ VAPB</i> | miR-488-5p          | 1 |
| <i>circ VAPB</i> | miR-489-3p          | 1 |
| <i>circ VAPB</i> | miR-490-5p          | 1 |
| <i>circ VAPB</i> | miR-491-3p          | 1 |
| <i>circ VAPB</i> | miR-491-5p          | 1 |
| <i>circ VAPB</i> | miR-493-3p          | 1 |
| <i>circ VAPB</i> | miR-493-5p          | 1 |
| <i>circ VAPB</i> | miR-494-3p          | 3 |
| <i>circ VAPB</i> | miR-495-3p          | 2 |
| <i>circ VAPB</i> | miR-498             | 1 |
| <i>circ VAPB</i> | miR-499a-3p/499b-3p | 3 |
| <i>circ VAPB</i> | miR-5000-3p         | 1 |
| <i>circ VAPB</i> | miR-5002-5p         | 1 |
| <i>circ VAPB</i> | miR-5003-3p         | 2 |
| <i>circ VAPB</i> | miR-5003-5p         | 2 |
| <i>circ VAPB</i> | miR-5006-5p         | 1 |
| <i>circ VAPB</i> | miR-5008-5p         | 1 |
| <i>circ VAPB</i> | miR-5009-5p/8058    | 1 |
| <i>circ VAPB</i> | miR-500a-5p         | 1 |
| <i>circ VAPB</i> | miR-500b-3p         | 1 |
| <i>circ VAPB</i> | miR-5011-3p         | 1 |
| <i>circ VAPB</i> | miR-503-5p          | 1 |
| <i>circ VAPB</i> | miR-504-3p          | 1 |
| <i>circ VAPB</i> | miR-505-3p.1        | 1 |
| <i>circ VAPB</i> | miR-505-3p.2        | 2 |

|                  |                             |   |
|------------------|-----------------------------|---|
| <i>circ VAPB</i> | miR-505-5p                  | 1 |
| <i>circ VAPB</i> | miR-506-5p                  | 2 |
| <i>circ VAPB</i> | miR-507/557                 | 1 |
| <i>circ VAPB</i> | miR-508-5p                  | 1 |
| <i>circ VAPB</i> | miR-5088-5p                 | 1 |
| <i>circ VAPB</i> | miR-5089-5p                 | 2 |
| <i>circ VAPB</i> | miR-5092                    | 2 |
| <i>circ VAPB</i> | miR-5093                    | 1 |
| <i>circ VAPB</i> | miR-5094                    | 1 |
| <i>circ VAPB</i> | miR-5095/7151-3p            | 1 |
| <i>circ VAPB</i> | miR-5096                    | 4 |
| <i>circ VAPB</i> | miR-510-3p                  | 1 |
| <i>circ VAPB</i> | miR-5100                    | 2 |
| <i>circ VAPB</i> | miR-511-5p                  | 3 |
| <i>circ VAPB</i> | miR-512-5p                  | 3 |
| <i>circ VAPB</i> | miR-513a-5p                 | 4 |
| <i>circ VAPB</i> | miR-513b-3p                 | 1 |
| <i>circ VAPB</i> | miR-513b-5p                 | 2 |
| <i>circ VAPB</i> | miR-513c-5p/514b-5p         | 2 |
| <i>circ VAPB</i> | miR-514a-3p                 | 1 |
| <i>circ VAPB</i> | miR-516a-3p/516b-3p/7162-5p | 2 |
| <i>circ VAPB</i> | miR-516b-5p                 | 1 |
| <i>circ VAPB</i> | miR-518-3p                  | 1 |
| <i>circ VAPB</i> | miR-5186                    | 1 |
| <i>circ VAPB</i> | miR-5187-5p                 | 3 |
| <i>circ VAPB</i> | miR-5189-3p                 | 1 |
| <i>circ VAPB</i> | miR-518a-5p/527             | 2 |
| <i>circ VAPB</i> | miR-518e-3p                 | 1 |
| <i>circ VAPB</i> | miR-5191                    | 1 |
| <i>circ VAPB</i> | miR-5192                    | 1 |
| <i>circ VAPB</i> | miR-5197-3p                 | 3 |
| <i>circ VAPB</i> | miR-5197-5p                 | 2 |
| <i>circ VAPB</i> | miR-520g-3p                 | 1 |
| <i>circ VAPB</i> | miR-520g-5p                 | 1 |
| <i>circ VAPB</i> | miR-522-3p                  | 2 |
| <i>circ VAPB</i> | miR-525-5p                  | 1 |
| <i>circ VAPB</i> | miR-526b-5p                 | 1 |
| <i>circ VAPB</i> | miR-539-5p                  | 2 |

|                  |                                                                  |   |
|------------------|------------------------------------------------------------------|---|
| <i>circ VAPB</i> | miR-541-5p                                                       | 1 |
| <i>circ VAPB</i> | miR-542-3p                                                       | 1 |
| <i>circ VAPB</i> | miR-543                                                          | 2 |
| <i>circ VAPB</i> | miR-545-3p                                                       | 2 |
| <i>circ VAPB</i> | miR-548ac/548bb-3p/548d-3p/548h-3p/548z                          |   |
| <i>circ VAPB</i> | miR-548ai/548ag/548ba/570-5p                                     | 1 |
| <i>circ VAPB</i> | miR-548an                                                        | 2 |
| <i>circ VAPB</i> | miR-548ao-5p/548ax                                               | 1 |
| <i>circ VAPB</i> | miR-548aq-3p/548am-3p/548aj-3p/548ah-3p/548ae-3p/548j-3p/548x-3p |   |
| <i>circ VAPB</i> | miR-548av-3p                                                     | 1 |
| <i>circ VAPB</i> | miR-548av-5p/548k/8054                                           | 2 |
| <i>circ VAPB</i> | miR-548aw                                                        | 2 |
| <i>circ VAPB</i> | miR-548ay-5p/548au-5p/548as-5p/548ar-3p/548aq-5p/548ap-5p/548am- |   |
| <i>circ VAPB</i> | miR-548b-3p                                                      | 2 |
| <i>circ VAPB</i> | miR-548c-3p                                                      | 4 |
| <i>circ VAPB</i> | miR-548e-5p                                                      | 1 |
| <i>circ VAPB</i> | miR-548g-3p                                                      | 1 |
| <i>circ VAPB</i> | miR-548l                                                         | 2 |
| <i>circ VAPB</i> | miR-548m                                                         | 1 |
| <i>circ VAPB</i> | miR-548p                                                         | 1 |
| <i>circ VAPB</i> | miR-548s                                                         | 1 |
| <i>circ VAPB</i> | miR-550b-3p                                                      | 1 |
| <i>circ VAPB</i> | miR-551b-5p                                                      | 2 |
| <i>circ VAPB</i> | miR-552-5p                                                       | 1 |
| <i>circ VAPB</i> | miR-555                                                          | 2 |
| <i>circ VAPB</i> | miR-5579-5p                                                      | 1 |
| <i>circ VAPB</i> | miR-558                                                          | 1 |
| <i>circ VAPB</i> | miR-5580-5p                                                      | 2 |
| <i>circ VAPB</i> | miR-5584-3p                                                      | 1 |
| <i>circ VAPB</i> | miR-5584-5p                                                      | 3 |
| <i>circ VAPB</i> | miR-5585-5p                                                      | 1 |
| <i>circ VAPB</i> | miR-5587-5p                                                      | 1 |
| <i>circ VAPB</i> | miR-5589-5p                                                      | 1 |
| <i>circ VAPB</i> | miR-5591-3p                                                      | 1 |
| <i>circ VAPB</i> | miR-561-5p                                                       | 1 |
| <i>circ VAPB</i> | miR-562                                                          | 1 |
| <i>circ VAPB</i> | miR-568                                                          | 1 |
| <i>circ VAPB</i> | miR-5680                                                         | 3 |

|                  |                  |   |
|------------------|------------------|---|
| <i>circ VAPB</i> | miR-5681a        | 1 |
| <i>circ VAPB</i> | miR-5689         | 1 |
| <i>circ VAPB</i> | miR-5690         | 2 |
| <i>circ VAPB</i> | miR-5692a        | 4 |
| <i>circ VAPB</i> | miR-5693         | 2 |
| <i>circ VAPB</i> | miR-5696         | 1 |
| <i>circ VAPB</i> | miR-5699-5p      | 2 |
| <i>circ VAPB</i> | miR-5701         | 1 |
| <i>circ VAPB</i> | miR-5704         | 1 |
| <i>circ VAPB</i> | miR-573/3616-5p  | 1 |
| <i>circ VAPB</i> | miR-575/4676-5p  | 2 |
| <i>circ VAPB</i> | miR-576-3p       | 1 |
| <i>circ VAPB</i> | miR-577          | 1 |
| <i>circ VAPB</i> | miR-579-3p       | 1 |
| <i>circ VAPB</i> | miR-580-3p       | 2 |
| <i>circ VAPB</i> | miR-580-5p       | 2 |
| <i>circ VAPB</i> | miR-582-5p       | 2 |
| <i>circ VAPB</i> | miR-583          | 2 |
| <i>circ VAPB</i> | miR-587          | 2 |
| <i>circ VAPB</i> | miR-588          | 1 |
| <i>circ VAPB</i> | miR-589-5p       | 1 |
| <i>circ VAPB</i> | miR-590-3p       | 2 |
| <i>circ VAPB</i> | miR-591          | 1 |
| <i>circ VAPB</i> | miR-595          | 1 |
| <i>circ VAPB</i> | miR-597-5p       | 3 |
| <i>circ VAPB</i> | miR-600          | 1 |
| <i>circ VAPB</i> | miR-603          | 2 |
| <i>circ VAPB</i> | miR-604          | 1 |
| <i>circ VAPB</i> | miR-605-5p       | 1 |
| <i>circ VAPB</i> | miR-6069         | 1 |
| <i>circ VAPB</i> | miR-607          | 5 |
| <i>circ VAPB</i> | miR-6071         | 2 |
| <i>circ VAPB</i> | miR-6072/6891-3p | 1 |
| <i>circ VAPB</i> | miR-6077         | 1 |
| <i>circ VAPB</i> | miR-6079         | 2 |
| <i>circ VAPB</i> | miR-6089         | 1 |
| <i>circ VAPB</i> | miR-6124         | 3 |
| <i>circ VAPB</i> | miR-6126         | 2 |



|                  |                    |   |
|------------------|--------------------|---|
| <i>circ VAPB</i> | miR-6128           | 1 |
| <i>circ VAPB</i> | miR-617            | 1 |
| <i>circ VAPB</i> | miR-619-5p/6506-5p | 3 |
| <i>circ VAPB</i> | miR-622            | 1 |
| <i>circ VAPB</i> | miR-625-3p         | 1 |
| <i>circ VAPB</i> | miR-627-3p         | 1 |
| <i>circ VAPB</i> | miR-628-5p         | 1 |
| <i>circ VAPB</i> | miR-629-3p         | 3 |
| <i>circ VAPB</i> | miR-632/4288       | 1 |
| <i>circ VAPB</i> | miR-635/6774-5p    | 2 |
| <i>circ VAPB</i> | miR-638            | 1 |
| <i>circ VAPB</i> | miR-640            | 1 |
| <i>circ VAPB</i> | miR-642-3p         | 2 |
| <i>circ VAPB</i> | miR-642a-5p        | 1 |
| <i>circ VAPB</i> | miR-642b-5p        | 1 |
| <i>circ VAPB</i> | miR-646            | 1 |
| <i>circ VAPB</i> | miR-6501-3p        | 1 |
| <i>circ VAPB</i> | miR-6502-3p        | 1 |
| <i>circ VAPB</i> | miR-6505-3p        | 1 |
| <i>circ VAPB</i> | miR-6505-5p        | 1 |
| <i>circ VAPB</i> | miR-6508-5p/8067   | 1 |
| <i>circ VAPB</i> | miR-6509-3p        | 1 |
| <i>circ VAPB</i> | miR-651-3p         | 1 |
| <i>circ VAPB</i> | miR-651-5p         | 1 |
| <i>circ VAPB</i> | miR-6510-3p        | 1 |
| <i>circ VAPB</i> | miR-6511-3p        | 1 |
| <i>circ VAPB</i> | miR-6511-5p        | 1 |
| <i>circ VAPB</i> | miR-6513-3p        | 1 |
| <i>circ VAPB</i> | miR-6513-5p        | 2 |
| <i>circ VAPB</i> | miR-6515-3p        | 1 |
| <i>circ VAPB</i> | miR-6515-5p        | 1 |
| <i>circ VAPB</i> | miR-6516-3p        | 1 |
| <i>circ VAPB</i> | miR-6516-5p        | 3 |
| <i>circ VAPB</i> | miR-653-5p         | 1 |
| <i>circ VAPB</i> | miR-659-3p         | 1 |
| <i>circ VAPB</i> | miR-660-5p         | 1 |
| <i>circ VAPB</i> | miR-661            | 1 |
| <i>circ VAPB</i> | miR-665            | 1 |

|                  |                             |   |
|------------------|-----------------------------|---|
| <i>circ VAPB</i> | miR-671-5p                  | 2 |
| <i>circ VAPB</i> | miR-6715b-3p                | 2 |
| <i>circ VAPB</i> | miR-6719-3p                 | 1 |
| <i>circ VAPB</i> | miR-6720-5p                 | 1 |
| <i>circ VAPB</i> | miR-6721-5p                 | 1 |
| <i>circ VAPB</i> | miR-6728-3p                 | 2 |
| <i>circ VAPB</i> | miR-6728-5p                 | 2 |
| <i>circ VAPB</i> | miR-6729-3p                 | 1 |
| <i>circ VAPB</i> | miR-6730-3p                 | 1 |
| <i>circ VAPB</i> | miR-6730-5p                 | 1 |
| <i>circ VAPB</i> | miR-6731-5p/8085            | 1 |
| <i>circ VAPB</i> | miR-6733-3p                 | 2 |
| <i>circ VAPB</i> | miR-6734-3p                 | 2 |
| <i>circ VAPB</i> | miR-6735-3p                 | 1 |
| <i>circ VAPB</i> | miR-6737-5p/6812-5p/6819-5p | 1 |
| <i>circ VAPB</i> | miR-6739-3p                 | 3 |
| <i>circ VAPB</i> | miR-6740-3p                 | 1 |
| <i>circ VAPB</i> | miR-6742-5p                 | 1 |
| <i>circ VAPB</i> | miR-6744-5p                 | 2 |
| <i>circ VAPB</i> | miR-6747-3p                 | 2 |
| <i>circ VAPB</i> | miR-6749-3p                 | 2 |
| <i>circ VAPB</i> | miR-6750-3p                 | 3 |
| <i>circ VAPB</i> | miR-6750-5p/6822-5p         | 3 |
| <i>circ VAPB</i> | miR-6751-5p/6803-5p         | 1 |
| <i>circ VAPB</i> | miR-6752-3p                 | 1 |
| <i>circ VAPB</i> | miR-6752-5p/6842-5p/7110-5p | 1 |
| <i>circ VAPB</i> | miR-6755-3p                 | 2 |
| <i>circ VAPB</i> | miR-6755-5p                 | 3 |
| <i>circ VAPB</i> | miR-6757-3p                 | 3 |
| <i>circ VAPB</i> | miR-6757-5p                 | 1 |
| <i>circ VAPB</i> | miR-6759-3p                 | 1 |
| <i>circ VAPB</i> | miR-676-5p                  | 3 |
| <i>circ VAPB</i> | miR-6760-3p                 | 3 |
| <i>circ VAPB</i> | miR-6760-5p                 | 2 |
| <i>circ VAPB</i> | miR-6761-5p                 | 2 |
| <i>circ VAPB</i> | miR-6762-3p                 | 1 |
| <i>circ VAPB</i> | miR-6765-5p                 | 2 |
| <i>circ VAPB</i> | miR-6767-5p                 | 1 |

|                  |                     |   |
|------------------|---------------------|---|
| <i>circ VAPB</i> | miR-6768-3p         | 2 |
| <i>circ VAPB</i> | miR-6768-5p         | 1 |
| <i>circ VAPB</i> | miR-6770-5p         | 1 |
| <i>circ VAPB</i> | miR-6773-3p         | 2 |
| <i>circ VAPB</i> | miR-6776-3p         | 1 |
| <i>circ VAPB</i> | miR-6782-3p         | 1 |
| <i>circ VAPB</i> | miR-6782-5p         | 1 |
| <i>circ VAPB</i> | miR-6783-5p         | 2 |
| <i>circ VAPB</i> | miR-6784-3p/6862-3p | 1 |
| <i>circ VAPB</i> | miR-6787-3p         | 1 |
| <i>circ VAPB</i> | miR-6793-3p         | 1 |
| <i>circ VAPB</i> | miR-6794-3p         | 2 |
| <i>circ VAPB</i> | miR-6795-3p         | 1 |
| <i>circ VAPB</i> | miR-6796-3p         | 2 |
| <i>circ VAPB</i> | miR-6798-5p         | 1 |
| <i>circ VAPB</i> | miR-6799-5p         | 2 |
| <i>circ VAPB</i> | miR-6801-3p/6810-3p | 1 |
| <i>circ VAPB</i> | miR-6802-3p         | 1 |
| <i>circ VAPB</i> | miR-6806-5p         | 1 |
| <i>circ VAPB</i> | miR-6808-3p         | 1 |
| <i>circ VAPB</i> | miR-6809-3p         | 2 |
| <i>circ VAPB</i> | miR-6813-3p         | 2 |
| <i>circ VAPB</i> | miR-6819-3p/6877-3p | 4 |
| <i>circ VAPB</i> | miR-6823-5p         | 2 |
| <i>circ VAPB</i> | miR-6826-3p         | 3 |
| <i>circ VAPB</i> | miR-6827-5p         | 3 |
| <i>circ VAPB</i> | miR-6828-3p         | 2 |
| <i>circ VAPB</i> | miR-6828-5p         | 2 |
| <i>circ VAPB</i> | miR-6829-5p         | 2 |
| <i>circ VAPB</i> | miR-6830-3p         | 3 |
| <i>circ VAPB</i> | miR-6830-5p         | 1 |
| <i>circ VAPB</i> | miR-6831-3p         | 1 |
| <i>circ VAPB</i> | miR-6833-5p         | 2 |
| <i>circ VAPB</i> | miR-6835-5p         | 1 |
| <i>circ VAPB</i> | miR-6837-3p         | 2 |
| <i>circ VAPB</i> | miR-6840-3p         | 1 |
| <i>circ VAPB</i> | miR-6841-3p         | 2 |
| <i>circ VAPB</i> | miR-6841-5p         | 3 |

|                  |             |   |
|------------------|-------------|---|
| <i>circ VAPB</i> | miR-6844    | 2 |
| <i>circ VAPB</i> | miR-6847-5p | 1 |
| <i>circ VAPB</i> | miR-6851-3p | 2 |
| <i>circ VAPB</i> | miR-6854-5p | 1 |
| <i>circ VAPB</i> | miR-6856-3p | 1 |
| <i>circ VAPB</i> | miR-6858-3p | 2 |
| <i>circ VAPB</i> | miR-6864-5p | 2 |
| <i>circ VAPB</i> | miR-6865-3p | 1 |
| <i>circ VAPB</i> | miR-6866-5p | 1 |
| <i>circ VAPB</i> | miR-6867-3p | 1 |
| <i>circ VAPB</i> | miR-6868-3p | 2 |
| <i>circ VAPB</i> | miR-6868-5p | 2 |
| <i>circ VAPB</i> | miR-6870-3p | 1 |
| <i>circ VAPB</i> | miR-6871-5p | 1 |
| <i>circ VAPB</i> | miR-6873-5p | 3 |
| <i>circ VAPB</i> | miR-6875-3p | 4 |
| <i>circ VAPB</i> | miR-6878-3p | 1 |
| <i>circ VAPB</i> | miR-6878-5p | 1 |
| <i>circ VAPB</i> | miR-6879-3p | 2 |
| <i>circ VAPB</i> | miR-6881-5p | 1 |
| <i>circ VAPB</i> | miR-6882-5p | 1 |
| <i>circ VAPB</i> | miR-6883-3p | 1 |
| <i>circ VAPB</i> | miR-6884-3p | 2 |
| <i>circ VAPB</i> | miR-6885-3p | 1 |
| <i>circ VAPB</i> | miR-6887-3p | 1 |
| <i>circ VAPB</i> | miR-6888-3p | 2 |
| <i>circ VAPB</i> | miR-6890-5p | 2 |
| <i>circ VAPB</i> | miR-6892-3p | 2 |
| <i>circ VAPB</i> | miR-6892-5p | 1 |
| <i>circ VAPB</i> | miR-6895-5p | 1 |
| <i>circ VAPB</i> | miR-7-3p    | 1 |
| <i>circ VAPB</i> | miR-7-5p    | 1 |
| <i>circ VAPB</i> | miR-7106-5p | 2 |
| <i>circ VAPB</i> | miR-7108-5p | 1 |
| <i>circ VAPB</i> | miR-7109-3p | 1 |
| <i>circ VAPB</i> | miR-7109-5p | 1 |
| <i>circ VAPB</i> | miR-7113-5p | 1 |
| <i>circ VAPB</i> | miR-7151-5p | 1 |

|                  |                           |   |
|------------------|---------------------------|---|
| <i>circ VAPB</i> | miR-7152-3p               | 1 |
| <i>circ VAPB</i> | miR-7152-5p               | 2 |
| <i>circ VAPB</i> | miR-7153-3p               | 2 |
| <i>circ VAPB</i> | miR-7154-5p               | 1 |
| <i>circ VAPB</i> | miR-7156-3p               | 2 |
| <i>circ VAPB</i> | miR-7158-3p               | 5 |
| <i>circ VAPB</i> | miR-7159-5p               | 2 |
| <i>circ VAPB</i> | miR-7160-3p               | 1 |
| <i>circ VAPB</i> | miR-7160-5p               | 3 |
| <i>circ VAPB</i> | miR-7162-3p               | 1 |
| <i>circ VAPB</i> | miR-7515                  | 1 |
| <i>circ VAPB</i> | miR-758-5p                | 2 |
| <i>circ VAPB</i> | miR-762/4492/4498/5001-5p | 2 |
| <i>circ VAPB</i> | miR-766-3p                | 2 |
| <i>circ VAPB</i> | miR-7702                  | 3 |
| <i>circ VAPB</i> | miR-7703                  | 2 |
| <i>circ VAPB</i> | miR-7843-3p               | 1 |
| <i>circ VAPB</i> | miR-7847-3p               | 1 |
| <i>circ VAPB</i> | miR-7850-5p               | 1 |
| <i>circ VAPB</i> | miR-7974                  | 1 |
| <i>circ VAPB</i> | miR-7976                  | 1 |
| <i>circ VAPB</i> | miR-8056                  | 2 |
| <i>circ VAPB</i> | miR-8060                  | 1 |
| <i>circ VAPB</i> | miR-8075                  | 1 |
| <i>circ VAPB</i> | miR-8077                  | 3 |
| <i>circ VAPB</i> | miR-8084                  | 2 |
| <i>circ VAPB</i> | miR-8485                  | 2 |
| <i>circ VAPB</i> | miR-873-3p                | 3 |
| <i>circ VAPB</i> | miR-873-5p.1              | 2 |
| <i>circ VAPB</i> | miR-873-5p.2              | 1 |
| <i>circ VAPB</i> | miR-874-3p                | 1 |
| <i>circ VAPB</i> | miR-874-5p                | 1 |
| <i>circ VAPB</i> | miR-875-3p                | 1 |
| <i>circ VAPB</i> | miR-876-5p                | 2 |
| <i>circ VAPB</i> | miR-877-5p                | 1 |
| <i>circ VAPB</i> | miR-887-5p                | 2 |
| <i>circ VAPB</i> | miR-888-3p                | 2 |
| <i>circ VAPB</i> | miR-889-5p                | 1 |

|                   |                                       |   |
|-------------------|---------------------------------------|---|
| <i>circ VAPB</i>  | miR-891a-3p                           | 1 |
| <i>circ VAPB</i>  | miR-892-5p                            | 2 |
| <i>circ VAPB</i>  | miR-892b                              | 2 |
| <i>circ VAPB</i>  | miR-9-3p                              | 2 |
| <i>circ VAPB</i>  | miR-922                               | 1 |
| <i>circ VAPB</i>  | miR-93-3p                             | 2 |
| <i>circ VAPB</i>  | miR-942-3p                            | 1 |
| <i>circ VAPB</i>  | miR-942-5p                            | 2 |
| <i>circ VAPB</i>  | miR-944                               | 3 |
| <i>circ VAPB</i>  | miR-9500                              | 3 |
| <i>circ VAPB</i>  | miR-96-3p                             | 3 |
| <i>circ VAPB</i>  | miR-99-3p                             | 2 |
| <i>circ WDR49</i> | let-7-5p/98-5p                        | 3 |
| <i>circ WDR49</i> | let-7a-3p/let-7b-3p/let-7f-1-3p/98-3p | 1 |
| <i>circ WDR49</i> | let-7f-2-3p/1185-3p                   | 1 |
| <i>circ WDR49</i> | miR-10-5p                             | 2 |
| <i>circ WDR49</i> | miR-101-5p                            | 2 |
| <i>circ WDR49</i> | miR-106a-3p                           | 1 |
| <i>circ WDR49</i> | miR-1178-3p                           | 2 |
| <i>circ WDR49</i> | miR-1180-5p                           | 3 |
| <i>circ WDR49</i> | miR-1184                              | 5 |
| <i>circ WDR49</i> | miR-1185-5p                           | 2 |
| <i>circ WDR49</i> | miR-1205                              | 5 |
| <i>circ WDR49</i> | miR-1224-3p                           | 1 |
| <i>circ WDR49</i> | miR-1224-5p                           | 1 |
| <i>circ WDR49</i> | miR-1225-3p                           | 1 |
| <i>circ WDR49</i> | miR-1226-5p                           | 2 |
| <i>circ WDR49</i> | miR-1231                              | 1 |
| <i>circ WDR49</i> | miR-1246                              | 6 |
| <i>circ WDR49</i> | miR-125-5p                            | 2 |
| <i>circ WDR49</i> | miR-1253                              | 5 |
| <i>circ WDR49</i> | miR-125a-3p                           | 1 |
| <i>circ WDR49</i> | miR-126-5p                            | 3 |
| <i>circ WDR49</i> | miR-1260a/1260b                       | 1 |
| <i>circ WDR49</i> | miR-1266-3p                           | 3 |
| <i>circ WDR49</i> | miR-1270                              | 5 |
| <i>circ WDR49</i> | miR-1272                              | 3 |
| <i>circ WDR49</i> | miR-1273f                             | 1 |

|                  |                                     |   |
|------------------|-------------------------------------|---|
| <i>circWDR49</i> | miR-1273h-3p                        | 1 |
| <i>circWDR49</i> | miR-1276                            | 5 |
| <i>circWDR49</i> | miR-1277-5p                         | 1 |
| <i>circWDR49</i> | miR-1278                            | 3 |
| <i>circWDR49</i> | miR-1279                            | 2 |
| <i>circWDR49</i> | miR-1289                            | 1 |
| <i>circWDR49</i> | miR-129-5p                          | 1 |
| <i>circWDR49</i> | miR-1296-5p                         | 1 |
| <i>circWDR49</i> | miR-1298-3p                         | 3 |
| <i>circWDR49</i> | miR-1298-5p                         | 3 |
| <i>circWDR49</i> | miR-1299                            | 5 |
| <i>circWDR49</i> | miR-1303                            | 3 |
| <i>circWDR49</i> | miR-1322                            | 3 |
| <i>circWDR49</i> | miR-1323                            | 2 |
| <i>circWDR49</i> | miR-133a-3p.2/133b                  | 1 |
| <i>circWDR49</i> | miR-134-5p                          | 2 |
| <i>circWDR49</i> | miR-139-3p                          | 3 |
| <i>circWDR49</i> | miR-140-3p.1                        | 3 |
| <i>circWDR49</i> | miR-140-3p.2                        | 1 |
| <i>circWDR49</i> | miR-141-3p/200-3p                   | 2 |
| <i>circWDR49</i> | miR-143-3p                          | 1 |
| <i>circWDR49</i> | miR-143-5p                          | 4 |
| <i>circWDR49</i> | miR-145-5p                          | 2 |
| <i>circWDR49</i> | miR-1468-3p                         | 2 |
| <i>circWDR49</i> | miR-1470                            | 1 |
| <i>circWDR49</i> | miR-147a                            | 3 |
| <i>circWDR49</i> | miR-148-3p/152-3p                   | 1 |
| <i>circWDR49</i> | miR-148a-5p                         | 1 |
| <i>circWDR49</i> | miR-149-5p                          | 1 |
| <i>circWDR49</i> | miR-150-5p                          | 2 |
| <i>circWDR49</i> | miR-16-1-3p                         | 1 |
| <i>circWDR49</i> | miR-17-3p                           | 5 |
| <i>circWDR49</i> | miR-17-5p/20-5p/93-5p/106-5p/519-3p | 8 |
| <i>circWDR49</i> | miR-181-5p                          | 4 |
| <i>circWDR49</i> | miR-183-3p                          | 2 |
| <i>circWDR49</i> | miR-183-5p.1                        | 2 |
| <i>circWDR49</i> | miR-188-3p                          | 1 |
| <i>circWDR49</i> | miR-190a-3p                         | 2 |

|                  |                                              |   |
|------------------|----------------------------------------------|---|
| <i>circWDR49</i> | miR-1911-5p                                  | 1 |
| <i>circWDR49</i> | miR-193-3p                                   | 3 |
| <i>circWDR49</i> | miR-197-3p                                   | 5 |
| <i>circWDR49</i> | miR-1976                                     | 1 |
| <i>circWDR49</i> | miR-200c-5p/550a-3p                          | 2 |
| <i>circWDR49</i> | miR-202-5p                                   | 2 |
| <i>circWDR49</i> | miR-204-3p/4646-5p                           | 5 |
| <i>circWDR49</i> | miR-2113                                     | 2 |
| <i>circWDR49</i> | miR-2116-3p                                  | 2 |
| <i>circWDR49</i> | miR-2116-5p                                  | 4 |
| <i>circWDR49</i> | miR-217                                      | 3 |
| <i>circWDR49</i> | miR-218-5p                                   | 1 |
| <i>circWDR49</i> | miR-219a-1-3p                                | 2 |
| <i>circWDR49</i> | miR-22-5p                                    | 4 |
| <i>circWDR49</i> | miR-223-3p                                   | 1 |
| <i>circWDR49</i> | miR-224-5p                                   | 4 |
| <i>circWDR49</i> | miR-2276-3p                                  | 2 |
| <i>circWDR49</i> | miR-2392                                     | 6 |
| <i>circWDR49</i> | miR-24-3p                                    | 2 |
| <i>circWDR49</i> | miR-2681-3p                                  | 2 |
| <i>circWDR49</i> | miR-2681-5p                                  | 3 |
| <i>circWDR49</i> | miR-28-5p/708-5p                             | 2 |
| <i>circWDR49</i> | miR-29-3p                                    | 1 |
| <i>circWDR49</i> | miR-2909                                     | 1 |
| <i>circWDR49</i> | miR-299-3p                                   | 3 |
| <i>circWDR49</i> | miR-29c-5p                                   | 1 |
| <i>circWDR49</i> | miR-301a-5p/301b-5p                          | 2 |
| <i>circWDR49</i> | miR-302a-5p                                  | 3 |
| <i>circWDR49</i> | miR-302c-3p.2/520-3p                         | 1 |
| <i>circWDR49</i> | miR-3065-3p                                  | 4 |
| <i>circWDR49</i> | miR-30b-3p/1273h-5p/3689-3p/6779-5p/6780a-5p | 3 |
| <i>circWDR49</i> | miR-30c-3p/6788-5p                           | 3 |
| <i>circWDR49</i> | miR-3117-5p                                  | 3 |
| <i>circWDR49</i> | miR-3120-3p                                  | 4 |
| <i>circWDR49</i> | miR-3120-5p                                  | 1 |
| <i>circWDR49</i> | miR-3122/3913-5p                             | 3 |
| <i>circWDR49</i> | miR-3123                                     | 6 |
| <i>circWDR49</i> | miR-3126-3p                                  | 3 |



|                  |                       |    |
|------------------|-----------------------|----|
| <i>circWDR49</i> | miR-3128              | 4  |
| <i>circWDR49</i> | miR-3134              | 7  |
| <i>circWDR49</i> | miR-3136-5p/4439      | 2  |
| <i>circWDR49</i> | miR-3140-5p           | 3  |
| <i>circWDR49</i> | miR-3145-5p           | 4  |
| <i>circWDR49</i> | miR-3150a-5p/3150b-5p | 2  |
| <i>circWDR49</i> | miR-3150b-3p          | 1  |
| <i>circWDR49</i> | miR-3156-3p           | 1  |
| <i>circWDR49</i> | miR-3156-5p           | 2  |
| <i>circWDR49</i> | miR-3158-3p           | 1  |
| <i>circWDR49</i> | miR-3158-5p           | 5  |
| <i>circWDR49</i> | miR-3160-5p           | 3  |
| <i>circWDR49</i> | miR-3161              | 3  |
| <i>circWDR49</i> | miR-3164              | 2  |
| <i>circWDR49</i> | miR-3166              | 2  |
| <i>circWDR49</i> | miR-3173-3p/6891-5p   | 6  |
| <i>circWDR49</i> | miR-3174              | 2  |
| <i>circWDR49</i> | miR-3182              | 2  |
| <i>circWDR49</i> | miR-3185              | 7  |
| <i>circWDR49</i> | miR-3189-5p           | 2  |
| <i>circWDR49</i> | miR-3190-3p           | 7  |
| <i>circWDR49</i> | miR-3192-3p           | 2  |
| <i>circWDR49</i> | miR-3192-5p           | 5  |
| <i>circWDR49</i> | miR-3198/4309         | 1  |
| <i>circWDR49</i> | miR-32-3p             | 3  |
| <i>circWDR49</i> | miR-3201/4791         | 10 |
| <i>circWDR49</i> | miR-323a-5p           | 1  |
| <i>circWDR49</i> | miR-329-5p            | 5  |
| <i>circWDR49</i> | miR-330-3p            | 2  |
| <i>circWDR49</i> | miR-330-3p.2          | 6  |
| <i>circWDR49</i> | miR-335-3p            | 3  |
| <i>circWDR49</i> | miR-338-5p            | 4  |
| <i>circWDR49</i> | miR-345-3p            | 3  |
| <i>circWDR49</i> | miR-346               | 1  |
| <i>circWDR49</i> | miR-3591-5p           | 2  |
| <i>circWDR49</i> | miR-3605-5p           | 2  |
| <i>circWDR49</i> | miR-3607-5p           | 3  |
| <i>circWDR49</i> | miR-3613-3p           | 5  |

|                  |                           |   |
|------------------|---------------------------|---|
| <i>circWDR49</i> | miR-3616-3p               | 2 |
| <i>circWDR49</i> | miR-3618                  | 2 |
| <i>circWDR49</i> | miR-3620-3p               | 2 |
| <i>circWDR49</i> | miR-3653-3p               | 7 |
| <i>circWDR49</i> | miR-3653-5p               | 1 |
| <i>circWDR49</i> | miR-3662                  | 3 |
| <i>circWDR49</i> | miR-3664-5p               | 5 |
| <i>circWDR49</i> | miR-3667-3p               | 2 |
| <i>circWDR49</i> | miR-3672/6864-3p          | 4 |
| <i>circWDR49</i> | miR-3678-3p               | 1 |
| <i>circWDR49</i> | miR-3681-5p               | 8 |
| <i>circWDR49</i> | miR-3684                  | 3 |
| <i>circWDR49</i> | miR-3685                  | 2 |
| <i>circWDR49</i> | miR-3688-3p               | 5 |
| <i>circWDR49</i> | miR-3689d/6851-5p         | 1 |
| <i>circWDR49</i> | miR-369-5p                | 1 |
| <i>circWDR49</i> | miR-371-5p                | 2 |
| <i>circWDR49</i> | miR-371b-5p/373-5p/616-5p | 2 |
| <i>circWDR49</i> | miR-372-5p                | 2 |
| <i>circWDR49</i> | miR-376-3p                | 1 |
| <i>circWDR49</i> | miR-377-5p/6086           | 5 |
| <i>circWDR49</i> | miR-380-5p/563            | 1 |
| <i>circWDR49</i> | miR-381-3p                | 5 |
| <i>circWDR49</i> | miR-382-3p                | 4 |
| <i>circWDR49</i> | miR-383-3p                | 4 |
| <i>circWDR49</i> | miR-383-5p.2              | 1 |
| <i>circWDR49</i> | miR-384                   | 2 |
| <i>circWDR49</i> | miR-3913-3p               | 2 |
| <i>circWDR49</i> | miR-3915                  | 1 |
| <i>circWDR49</i> | miR-3919                  | 6 |
| <i>circWDR49</i> | miR-3920                  | 3 |
| <i>circWDR49</i> | miR-3921/4653-5p          | 2 |
| <i>circWDR49</i> | miR-3922-5p               | 3 |
| <i>circWDR49</i> | miR-3925-3p               | 2 |
| <i>circWDR49</i> | miR-3925-5p               | 6 |
| <i>circWDR49</i> | miR-3928-3p               | 3 |
| <i>circWDR49</i> | miR-3934-5p               | 1 |
| <i>circWDR49</i> | miR-3976                  | 1 |

|                  |                                              |    |
|------------------|----------------------------------------------|----|
| <i>circWDR49</i> | miR-3978                                     | 8  |
| <i>circWDR49</i> | miR-410-3p                                   | 3  |
| <i>circWDR49</i> | miR-412-3p/6754-3p                           | 4  |
| <i>circWDR49</i> | miR-421                                      | 4  |
| <i>circWDR49</i> | miR-425-5p                                   | 2  |
| <i>circWDR49</i> | miR-4257                                     | 4  |
| <i>circWDR49</i> | miR-4259                                     | 1  |
| <i>circWDR49</i> | miR-4263                                     | 2  |
| <i>circWDR49</i> | miR-4264                                     | 1  |
| <i>circWDR49</i> | miR-4268                                     | 1  |
| <i>circWDR49</i> | miR-4270/4441/6754-5p                        | 1  |
| <i>circWDR49</i> | miR-4272                                     | 5  |
| <i>circWDR49</i> | miR-4273/7156-5p                             | 6  |
| <i>circWDR49</i> | miR-4276                                     | 1  |
| <i>circWDR49</i> | miR-4279                                     | 1  |
| <i>circWDR49</i> | miR-4282                                     | 2  |
| <i>circWDR49</i> | miR-4284                                     | 2  |
| <i>circWDR49</i> | miR-4293                                     | 3  |
| <i>circWDR49</i> | miR-4294                                     | 1  |
| <i>circWDR49</i> | miR-4299                                     | 1  |
| <i>circWDR49</i> | miR-4311                                     | 5  |
| <i>circWDR49</i> | miR-4318                                     | 2  |
| <i>circWDR49</i> | miR-432-3p                                   | 6  |
| <i>circWDR49</i> | miR-4326                                     | 1  |
| <i>circWDR49</i> | miR-433-3p                                   | 2  |
| <i>circWDR49</i> | miR-4422                                     | 6  |
| <i>circWDR49</i> | miR-4424                                     | 2  |
| <i>circWDR49</i> | miR-4426/4647/4662b                          | 12 |
| <i>circWDR49</i> | miR-4427                                     | 1  |
| <i>circWDR49</i> | miR-4428                                     | 6  |
| <i>circWDR49</i> | miR-4433a-3p                                 | 4  |
| <i>circWDR49</i> | miR-4434/4516/5703                           | 5  |
| <i>circWDR49</i> | miR-4436b-3p/4632-5p/6735-5p/6879-5p/7843-5p | 7  |
| <i>circWDR49</i> | miR-4443                                     | 1  |
| <i>circWDR49</i> | miR-4446-3p                                  | 1  |
| <i>circWDR49</i> | miR-4448                                     | 1  |
| <i>circWDR49</i> | miR-4452                                     | 2  |
| <i>circWDR49</i> | miR-4456                                     | 1  |

|                  |                       |   |
|------------------|-----------------------|---|
| <i>circWDR49</i> | miR-4459              | 4 |
| <i>circWDR49</i> | miR-4460              | 3 |
| <i>circWDR49</i> | miR-4463              | 1 |
| <i>circWDR49</i> | miR-4470              | 2 |
| <i>circWDR49</i> | miR-4482-3p           | 5 |
| <i>circWDR49</i> | miR-4490              | 1 |
| <i>circWDR49</i> | miR-4491/4657         | 3 |
| <i>circWDR49</i> | miR-4494              | 1 |
| <i>circWDR49</i> | miR-4496              | 4 |
| <i>circWDR49</i> | miR-4499              | 1 |
| <i>circWDR49</i> | miR-4504              | 3 |
| <i>circWDR49</i> | miR-4509              | 2 |
| <i>circWDR49</i> | miR-450a-1-3p         | 3 |
| <i>circWDR49</i> | miR-450b-3p/769-3p    | 2 |
| <i>circWDR49</i> | miR-4511              | 1 |
| <i>circWDR49</i> | miR-4520-5p           | 1 |
| <i>circWDR49</i> | miR-4521              | 2 |
| <i>circWDR49</i> | miR-4531              | 5 |
| <i>circWDR49</i> | miR-4534/8082         | 7 |
| <i>circWDR49</i> | miR-455-3p.2          | 4 |
| <i>circWDR49</i> | miR-4633-3p/6500-5p   | 5 |
| <i>circWDR49</i> | miR-4639-5p           | 2 |
| <i>circWDR49</i> | miR-4642              | 3 |
| <i>circWDR49</i> | miR-4649-3p           | 2 |
| <i>circWDR49</i> | miR-4653-3p           | 3 |
| <i>circWDR49</i> | miR-4659a-3p/4659b-3p | 2 |
| <i>circWDR49</i> | miR-466               | 3 |
| <i>circWDR49</i> | miR-4661-3p           | 1 |
| <i>circWDR49</i> | miR-4666a-3p          | 5 |
| <i>circWDR49</i> | miR-4667-3p           | 1 |
| <i>circWDR49</i> | miR-4668-3p           | 5 |
| <i>circWDR49</i> | miR-4677-5p           | 6 |
| <i>circWDR49</i> | miR-4678              | 2 |
| <i>circWDR49</i> | miR-4680-3p           | 1 |
| <i>circWDR49</i> | miR-4681              | 1 |
| <i>circWDR49</i> | miR-4683              | 3 |
| <i>circWDR49</i> | miR-4684-5p           | 4 |
| <i>circWDR49</i> | miR-4689/6858-5p      | 1 |

|                  |                             |   |
|------------------|-----------------------------|---|
| <i>circWDR49</i> | miR-4691-5p/6792-3p         | 2 |
| <i>circWDR49</i> | miR-4693-5p                 | 3 |
| <i>circWDR49</i> | miR-4695-5p                 | 5 |
| <i>circWDR49</i> | miR-4696                    | 8 |
| <i>circWDR49</i> | miR-4697-3p                 | 1 |
| <i>circWDR49</i> | miR-4698                    | 2 |
| <i>circWDR49</i> | miR-4700-3p                 | 2 |
| <i>circWDR49</i> | miR-4705                    | 1 |
| <i>circWDR49</i> | miR-4708-5p                 | 1 |
| <i>circWDR49</i> | miR-4709-3p                 | 5 |
| <i>circWDR49</i> | miR-4709-5p                 | 3 |
| <i>circWDR49</i> | miR-4711-3p                 | 1 |
| <i>circWDR49</i> | miR-4712-3p                 | 4 |
| <i>circWDR49</i> | miR-4714-3p                 | 1 |
| <i>circWDR49</i> | miR-4714-5p                 | 5 |
| <i>circWDR49</i> | miR-4715-5p                 | 1 |
| <i>circWDR49</i> | miR-4716-5p                 | 2 |
| <i>circWDR49</i> | miR-4720-5p/4799-3p/5588-5p | 4 |
| <i>circWDR49</i> | miR-4721                    | 2 |
| <i>circWDR49</i> | miR-4724-3p                 | 1 |
| <i>circWDR49</i> | miR-4727-3p                 | 3 |
| <i>circWDR49</i> | miR-4728-3p                 | 2 |
| <i>circWDR49</i> | miR-4731-5p                 | 3 |
| <i>circWDR49</i> | miR-4732-3p                 | 2 |
| <i>circWDR49</i> | miR-4735-5p                 | 2 |
| <i>circWDR49</i> | miR-4739                    | 2 |
| <i>circWDR49</i> | miR-4744                    | 2 |
| <i>circWDR49</i> | miR-4747-3p                 | 1 |
| <i>circWDR49</i> | miR-4751                    | 1 |
| <i>circWDR49</i> | miR-4752                    | 4 |
| <i>circWDR49</i> | miR-4753-5p                 | 3 |
| <i>circWDR49</i> | miR-4755-3p                 | 1 |
| <i>circWDR49</i> | miR-4756-3p                 | 6 |
| <i>circWDR49</i> | miR-4758-3p                 | 2 |
| <i>circWDR49</i> | miR-4761-3p                 | 3 |
| <i>circWDR49</i> | miR-4764-3p                 | 4 |
| <i>circWDR49</i> | miR-4768-3p                 | 4 |
| <i>circWDR49</i> | miR-4768-5p/6833-3p         | 4 |

|                  |                          |   |
|------------------|--------------------------|---|
| <i>circWDR49</i> | miR-4771                 | 2 |
| <i>circWDR49</i> | miR-4772-3p              | 2 |
| <i>circWDR49</i> | miR-4773                 | 4 |
| <i>circWDR49</i> | miR-4774-5p              | 1 |
| <i>circWDR49</i> | miR-4775                 | 3 |
| <i>circWDR49</i> | miR-4777-3p              | 1 |
| <i>circWDR49</i> | miR-4779                 | 5 |
| <i>circWDR49</i> | miR-4782-5p/5706         | 5 |
| <i>circWDR49</i> | miR-4786-3p              | 6 |
| <i>circWDR49</i> | miR-4789-5p              | 1 |
| <i>circWDR49</i> | miR-4790-3p              | 1 |
| <i>circWDR49</i> | miR-4795-3p              | 1 |
| <i>circWDR49</i> | miR-4797-3p              | 1 |
| <i>circWDR49</i> | miR-4797-5p              | 5 |
| <i>circWDR49</i> | miR-4802-5p              | 6 |
| <i>circWDR49</i> | miR-4803                 | 2 |
| <i>circWDR49</i> | miR-487a-5p/487b-5p      | 3 |
| <i>circWDR49</i> | miR-489-3p               | 2 |
| <i>circWDR49</i> | miR-490-3p               | 1 |
| <i>circWDR49</i> | miR-495-3p               | 4 |
| <i>circWDR49</i> | miR-499b-5p              | 1 |
| <i>circWDR49</i> | miR-5002-3p              | 1 |
| <i>circWDR49</i> | miR-5004-3p              | 2 |
| <i>circWDR49</i> | miR-5004-5p              | 1 |
| <i>circWDR49</i> | miR-5009-3p              | 2 |
| <i>circWDR49</i> | miR-5010-3p              | 2 |
| <i>circWDR49</i> | miR-5011-5p              | 4 |
| <i>circWDR49</i> | miR-504-3p               | 4 |
| <i>circWDR49</i> | miR-504-5p.1             | 2 |
| <i>circWDR49</i> | miR-505-3p.2             | 4 |
| <i>circWDR49</i> | miR-508-5p               | 4 |
| <i>circWDR49</i> | miR-5088-5p              | 1 |
| <i>circWDR49</i> | miR-5089-5p              | 2 |
| <i>circWDR49</i> | miR-509-3-5p/509-5p/4418 | 3 |
| <i>circWDR49</i> | miR-5093                 | 3 |
| <i>circWDR49</i> | miR-510-3p               | 7 |
| <i>circWDR49</i> | miR-5100                 | 3 |
| <i>circWDR49</i> | miR-511-3p               | 1 |

|                  |                                                                  |   |
|------------------|------------------------------------------------------------------|---|
| <i>circWDR49</i> | miR-511-5p                                                       | 1 |
| <i>circWDR49</i> | miR-512-3p                                                       | 1 |
| <i>circWDR49</i> | miR-513a-3p/513c-3p/3606-3p                                      | 2 |
| <i>circWDR49</i> | miR-514a-3p                                                      | 4 |
| <i>circWDR49</i> | miR-514a-5p                                                      | 5 |
| <i>circWDR49</i> | miR-516b-5p                                                      | 5 |
| <i>circWDR49</i> | miR-5186                                                         | 7 |
| <i>circWDR49</i> | miR-5187-3p                                                      | 1 |
| <i>circWDR49</i> | miR-5189-3p                                                      | 1 |
| <i>circWDR49</i> | miR-5190                                                         | 3 |
| <i>circWDR49</i> | miR-5193                                                         | 1 |
| <i>circWDR49</i> | miR-524-5p                                                       | 4 |
| <i>circWDR49</i> | miR-526b-5p                                                      | 4 |
| <i>circWDR49</i> | miR-532-3p                                                       | 2 |
| <i>circWDR49</i> | miR-539-5p                                                       | 4 |
| <i>circWDR49</i> | miR-542-3p                                                       | 3 |
| <i>circWDR49</i> | miR-543                                                          | 5 |
| <i>circWDR49</i> | miR-545-3p                                                       | 4 |
| <i>circWDR49</i> | miR-545-5p                                                       | 2 |
| <i>circWDR49</i> | miR-548ac/548bb-3p/548d-3p/548h-3p/548z                          |   |
| <i>circWDR49</i> | miR-548ah-5p/3609                                                | 8 |
| <i>circWDR49</i> | miR-548aj-5p/548f-5p/548g-5p/548x-5p                             | 2 |
| <i>circWDR49</i> | miR-548ap-3p/548aa/548t-3p                                       | 2 |
| <i>circWDR49</i> | miR-548aq-3p/548am-3p/548aj-3p/548ah-3p/548ae-3p/548j-3p/548x-3p | 6 |
| <i>circWDR49</i> | miR-548as-3p                                                     | 2 |
| <i>circWDR49</i> | miR-548av-3p                                                     | 2 |
| <i>circWDR49</i> | miR-548ay-3p/548at-3p                                            | 2 |
| <i>circWDR49</i> | miR-548az-3p/548ar-3p/548a-3p/548e-3p/548f-3p                    | 7 |
| <i>circWDR49</i> | miR-548b-3p                                                      | 1 |
| <i>circWDR49</i> | miR-548c-3p                                                      | 3 |
| <i>circWDR49</i> | miR-548e-5p                                                      | 3 |
| <i>circWDR49</i> | miR-548g-3p                                                      | 5 |
| <i>circWDR49</i> | miR-548p                                                         | 3 |
| <i>circWDR49</i> | miR-548q                                                         | 1 |
| <i>circWDR49</i> | miR-551b-5p                                                      | 6 |
| <i>circWDR49</i> | miR-556-3p                                                       | 1 |
| <i>circWDR49</i> | miR-5582-3p                                                      | 5 |
| <i>circWDR49</i> | miR-5586-5p                                                      | 2 |

|                  |                    |   |
|------------------|--------------------|---|
| <i>circWDR49</i> | miR-5587-5p        | 2 |
| <i>circWDR49</i> | miR-5589-5p        | 3 |
| <i>circWDR49</i> | miR-5680           | 4 |
| <i>circWDR49</i> | miR-5681a          | 3 |
| <i>circWDR49</i> | miR-5682           | 2 |
| <i>circWDR49</i> | miR-5694           | 1 |
| <i>circWDR49</i> | miR-5699-5p        | 2 |
| <i>circWDR49</i> | miR-570-3p         | 8 |
| <i>circWDR49</i> | miR-5705           | 1 |
| <i>circWDR49</i> | miR-571            | 2 |
| <i>circWDR49</i> | miR-575/4676-5p    | 3 |
| <i>circWDR49</i> | miR-576-3p         | 2 |
| <i>circWDR49</i> | miR-576-5p         | 2 |
| <i>circWDR49</i> | miR-581            | 2 |
| <i>circWDR49</i> | miR-583            | 5 |
| <i>circWDR49</i> | miR-585-5p         | 2 |
| <i>circWDR49</i> | miR-589-3p         | 3 |
| <i>circWDR49</i> | miR-590-3p         | 3 |
| <i>circWDR49</i> | miR-591            | 3 |
| <i>circWDR49</i> | miR-592            | 3 |
| <i>circWDR49</i> | miR-596            | 3 |
| <i>circWDR49</i> | miR-599            | 3 |
| <i>circWDR49</i> | miR-607            | 3 |
| <i>circWDR49</i> | miR-6072/6891-3p   | 4 |
| <i>circWDR49</i> | miR-610            | 1 |
| <i>circWDR49</i> | miR-6128           | 4 |
| <i>circWDR49</i> | miR-618            | 8 |
| <i>circWDR49</i> | miR-619-3p         | 1 |
| <i>circWDR49</i> | miR-619-5p/6506-5p | 5 |
| <i>circWDR49</i> | miR-627-3p         | 4 |
| <i>circWDR49</i> | miR-632/4288       | 1 |
| <i>circWDR49</i> | miR-647            | 1 |
| <i>circWDR49</i> | miR-649            | 1 |
| <i>circWDR49</i> | miR-6499-3p        | 5 |
| <i>circWDR49</i> | miR-6502-3p        | 1 |
| <i>circWDR49</i> | miR-6505-5p        | 6 |
| <i>circWDR49</i> | miR-6507-3p        | 4 |
| <i>circWDR49</i> | miR-6507-5p        | 5 |



|                  |                     |   |
|------------------|---------------------|---|
| <i>circWDR49</i> | miR-651-3p          | 8 |
| <i>circWDR49</i> | miR-6511-3p         | 2 |
| <i>circWDR49</i> | miR-6512-5p         | 4 |
| <i>circWDR49</i> | miR-6513-5p         | 3 |
| <i>circWDR49</i> | miR-6514-5p         | 6 |
| <i>circWDR49</i> | miR-6515-5p         | 1 |
| <i>circWDR49</i> | miR-6516-3p         | 1 |
| <i>circWDR49</i> | miR-652-5p          | 1 |
| <i>circWDR49</i> | miR-654-3p          | 2 |
| <i>circWDR49</i> | miR-655-5p          | 5 |
| <i>circWDR49</i> | miR-656-5p          | 3 |
| <i>circWDR49</i> | miR-660-3p          | 1 |
| <i>circWDR49</i> | miR-664a-5p/4794    | 1 |
| <i>circWDR49</i> | miR-664b-5p         | 1 |
| <i>circWDR49</i> | miR-665             | 3 |
| <i>circWDR49</i> | miR-6720-5p         | 2 |
| <i>circWDR49</i> | miR-6728-3p         | 4 |
| <i>circWDR49</i> | miR-6728-5p         | 2 |
| <i>circWDR49</i> | miR-6730-5p         | 3 |
| <i>circWDR49</i> | miR-6731-5p/8085    | 4 |
| <i>circWDR49</i> | miR-6732-3p         | 1 |
| <i>circWDR49</i> | miR-6734-3p         | 2 |
| <i>circWDR49</i> | miR-6734-5p         | 2 |
| <i>circWDR49</i> | miR-6739-3p         | 3 |
| <i>circWDR49</i> | miR-6740-5p         | 1 |
| <i>circWDR49</i> | miR-6746-5p         | 1 |
| <i>circWDR49</i> | miR-6749-3p         | 2 |
| <i>circWDR49</i> | miR-6757-3p         | 5 |
| <i>circWDR49</i> | miR-676-5p          | 2 |
| <i>circWDR49</i> | miR-6760-5p         | 2 |
| <i>circWDR49</i> | miR-6770-5p         | 5 |
| <i>circWDR49</i> | miR-6772-3p         | 1 |
| <i>circWDR49</i> | miR-6780a-3p        | 3 |
| <i>circWDR49</i> | miR-6784-3p/6862-3p | 2 |
| <i>circWDR49</i> | miR-6793-3p         | 3 |
| <i>circWDR49</i> | miR-6801-5p         | 4 |
| <i>circWDR49</i> | miR-6802-3p         | 2 |
| <i>circWDR49</i> | miR-6807-5p         | 1 |

|                  |                     |   |
|------------------|---------------------|---|
| <i>circWDR49</i> | miR-6808-3p         | 1 |
| <i>circWDR49</i> | miR-6809-3p         | 4 |
| <i>circWDR49</i> | miR-6815-5p/6865-5p | 2 |
| <i>circWDR49</i> | miR-6818-5p         | 3 |
| <i>circWDR49</i> | miR-6826-5p         | 2 |
| <i>circWDR49</i> | miR-6833-5p         | 4 |
| <i>circWDR49</i> | miR-6834-5p         | 2 |
| <i>circWDR49</i> | miR-6837-3p         | 4 |
| <i>circWDR49</i> | miR-6842-3p         | 1 |
| <i>circWDR49</i> | miR-6844            | 4 |
| <i>circWDR49</i> | miR-6846-3p         | 1 |
| <i>circWDR49</i> | miR-6847-3p         | 1 |
| <i>circWDR49</i> | miR-6847-5p         | 4 |
| <i>circWDR49</i> | miR-6849-3p         | 1 |
| <i>circWDR49</i> | miR-6854-3p         | 1 |
| <i>circWDR49</i> | miR-6858-3p         | 3 |
| <i>circWDR49</i> | miR-6859-3p         | 1 |
| <i>circWDR49</i> | miR-6865-3p         | 2 |
| <i>circWDR49</i> | miR-6868-3p         | 4 |
| <i>circWDR49</i> | miR-6868-5p         | 4 |
| <i>circWDR49</i> | miR-6871-3p         | 1 |
| <i>circWDR49</i> | miR-6875-3p         | 2 |
| <i>circWDR49</i> | miR-6878-5p         | 4 |
| <i>circWDR49</i> | miR-6881-3p         | 3 |
| <i>circWDR49</i> | miR-6885-3p         | 4 |
| <i>circWDR49</i> | miR-6888-5p         | 3 |
| <i>circWDR49</i> | miR-6890-3p         | 2 |
| <i>circWDR49</i> | miR-6894-5p         | 5 |
| <i>circWDR49</i> | miR-7111-3p         | 3 |
| <i>circWDR49</i> | miR-7150            | 2 |
| <i>circWDR49</i> | miR-7153-3p         | 3 |
| <i>circWDR49</i> | miR-7154-3p         | 5 |
| <i>circWDR49</i> | miR-7154-5p         | 2 |
| <i>circWDR49</i> | miR-7159-3p         | 5 |
| <i>circWDR49</i> | miR-7159-5p         | 4 |
| <i>circWDR49</i> | miR-7161-3p         | 1 |
| <i>circWDR49</i> | miR-7162-3p         | 2 |
| <i>circWDR49</i> | miR-758-5p          | 1 |

|                  |                |   |
|------------------|----------------|---|
| <i>circWDR49</i> | miR-759        | 3 |
| <i>circWDR49</i> | miR-765        | 5 |
| <i>circWDR49</i> | miR-766-3p     | 2 |
| <i>circWDR49</i> | miR-766-5p     | 5 |
| <i>circWDR49</i> | miR-767-5p     | 1 |
| <i>circWDR49</i> | miR-770-5p     | 1 |
| <i>circWDR49</i> | miR-7702       | 4 |
| <i>circWDR49</i> | miR-7847-3p    | 2 |
| <i>circWDR49</i> | miR-7850-5p    | 2 |
| <i>circWDR49</i> | miR-7851-3p    | 1 |
| <i>circWDR49</i> | miR-7978       | 1 |
| <i>circWDR49</i> | miR-802        | 2 |
| <i>circWDR49</i> | miR-8055       | 2 |
| <i>circWDR49</i> | miR-8057       | 1 |
| <i>circWDR49</i> | miR-8063       | 2 |
| <i>circWDR49</i> | miR-8069       | 2 |
| <i>circWDR49</i> | miR-873-3p     | 4 |
| <i>circWDR49</i> | miR-874-5p     | 1 |
| <i>circWDR49</i> | miR-875-3p     | 3 |
| <i>circWDR49</i> | miR-875-5p     | 1 |
| <i>circWDR49</i> | miR-876-3p     | 1 |
| <i>circWDR49</i> | miR-887-5p     | 3 |
| <i>circWDR49</i> | miR-888-5p     | 3 |
| <i>circWDR49</i> | miR-891b       | 4 |
| <i>circWDR49</i> | miR-892a       | 2 |
| <i>circWDR49</i> | miR-9-3p       | 3 |
| <i>circWDR49</i> | miR-9-5p       | 3 |
| <i>circWDR49</i> | miR-934        | 2 |
| <i>circWDR49</i> | miR-942-5p     | 4 |
| <i>circWDR49</i> | miR-943        | 2 |
| <i>circWDR49</i> | miR-96-3p      | 2 |
| <i>circWDR49</i> | miR-100-3p     | 4 |
| <i>circWDR49</i> | miR-103-3p/107 | 3 |
| <i>circWDR49</i> | miR-103a-2-5p  | 1 |
| <i>circWDR49</i> | miR-105-5p     | 3 |
| <i>circWDR49</i> | miR-1178-5p    | 2 |
| <i>circWDR49</i> | miR-1179       | 2 |
| <i>circWDR49</i> | miR-1182       | 2 |

|                  |                          |   |
|------------------|--------------------------|---|
| <i>circWDR49</i> | miR-1183                 | 1 |
| <i>circWDR49</i> | miR-1197                 | 1 |
| <i>circWDR49</i> | miR-1207-3p              | 1 |
| <i>circWDR49</i> | miR-1225-5p              | 1 |
| <i>circWDR49</i> | miR-1226-3p              | 1 |
| <i>circWDR49</i> | miR-1227-5p              | 3 |
| <i>circWDR49</i> | miR-1229-5p              | 1 |
| <i>circWDR49</i> | miR-1234-3p/7107-5p      | 1 |
| <i>circWDR49</i> | miR-1236-3p              | 5 |
| <i>circWDR49</i> | miR-1237-3p              | 2 |
| <i>circWDR49</i> | miR-1238-3p              | 1 |
| <i>circWDR49</i> | miR-124-3p.1             | 4 |
| <i>circWDR49</i> | miR-124-5p               | 2 |
| <i>circWDR49</i> | miR-1243                 | 2 |
| <i>circWDR49</i> | miR-1245a/8079           | 1 |
| <i>circWDR49</i> | miR-1245b-3p             | 3 |
| <i>circWDR49</i> | miR-1245b-5p             | 5 |
| <i>circWDR49</i> | miR-1247-5p              | 1 |
| <i>circWDR49</i> | miR-1248                 | 2 |
| <i>circWDR49</i> | miR-1252-3p              | 1 |
| <i>circWDR49</i> | miR-1252-5p              | 5 |
| <i>circWDR49</i> | miR-1255a/1255b-5p       | 2 |
| <i>circWDR49</i> | miR-1256                 | 4 |
| <i>circWDR49</i> | miR-1261                 | 5 |
| <i>circWDR49</i> | miR-1262/4701-3p/6736-5p | 4 |
| <i>circWDR49</i> | miR-1264                 | 2 |
| <i>circWDR49</i> | miR-127-5p               | 5 |
| <i>circWDR49</i> | miR-1273e                | 4 |
| <i>circWDR49</i> | miR-128-1-5p             | 1 |
| <i>circWDR49</i> | miR-1286                 | 1 |
| <i>circWDR49</i> | miR-1288-3p              | 1 |
| <i>circWDR49</i> | miR-1291/6775-3p         | 1 |
| <i>circWDR49</i> | miR-1296-3p              | 1 |
| <i>circWDR49</i> | miR-130-3p/301-3p/454-3p | 2 |
| <i>circWDR49</i> | miR-1302/4298            | 6 |
| <i>circWDR49</i> | miR-1307-3p              | 1 |
| <i>circWDR49</i> | miR-130b-5p              | 2 |
| <i>circWDR49</i> | miR-132-3p/212-3p        | 1 |

|                  |                                      |   |
|------------------|--------------------------------------|---|
| <i>circWDR49</i> | miR-134-3p                           | 2 |
| <i>circWDR49</i> | miR-135-5p                           | 3 |
| <i>circWDR49</i> | miR-141-5p                           | 5 |
| <i>circWDR49</i> | miR-142-3p.2                         | 1 |
| <i>circWDR49</i> | miR-15-5p/16-5p/195-5p/424-5p/497-5p | 2 |
| <i>circWDR49</i> | miR-153-5p                           | 4 |
| <i>circWDR49</i> | miR-154-5p                           | 1 |
| <i>circWDR49</i> | miR-15b-3p                           | 2 |
| <i>circWDR49</i> | miR-16-2-3p/195-3p                   | 2 |
| <i>circWDR49</i> | miR-182-5p                           | 2 |
| <i>circWDR49</i> | miR-1825                             | 3 |
| <i>circWDR49</i> | miR-185-3p                           | 1 |
| <i>circWDR49</i> | miR-185-5p                           | 4 |
| <i>circWDR49</i> | miR-186-5p                           | 6 |
| <i>circWDR49</i> | miR-188-5p                           | 1 |
| <i>circWDR49</i> | miR-19-5p                            | 1 |
| <i>circWDR49</i> | miR-190-5p                           | 1 |
| <i>circWDR49</i> | miR-1914-5p                          | 2 |
| <i>circWDR49</i> | miR-1915-3p/6764-5p                  | 1 |
| <i>circWDR49</i> | miR-192-3p                           | 4 |
| <i>circWDR49</i> | miR-193a-5p                          | 1 |
| <i>circWDR49</i> | miR-194-3p                           | 4 |
| <i>circWDR49</i> | miR-194-5p                           | 1 |
| <i>circWDR49</i> | miR-196a-3p                          | 3 |
| <i>circWDR49</i> | miR-1972                             | 2 |
| <i>circWDR49</i> | miR-198                              | 2 |
| <i>circWDR49</i> | miR-199-5p                           | 3 |
| <i>circWDR49</i> | miR-200-3p/429                       | 2 |
| <i>circWDR49</i> | miR-202-3p                           | 2 |
| <i>circWDR49</i> | miR-205-3p                           | 2 |
| <i>circWDR49</i> | miR-205-5p                           | 1 |
| <i>circWDR49</i> | miR-2052                             | 1 |
| <i>circWDR49</i> | miR-2054                             | 1 |
| <i>circWDR49</i> | miR-208-5p                           | 5 |
| <i>circWDR49</i> | miR-21-3p/3591-3p                    | 4 |
| <i>circWDR49</i> | miR-21-5p/590-5p                     | 1 |
| <i>circWDR49</i> | miR-2110                             | 6 |
| <i>circWDR49</i> | miR-2114-5p                          | 1 |

|                  |                       |   |
|------------------|-----------------------|---|
| <i>circWDR49</i> | miR-2115-3p           | 1 |
| <i>circWDR49</i> | miR-214-3p/3619-5p    | 1 |
| <i>circWDR49</i> | miR-214-5p            | 1 |
| <i>circWDR49</i> | miR-219-5p            | 2 |
| <i>circWDR49</i> | miR-219b-5p           | 3 |
| <i>circWDR49</i> | miR-22-3p             | 3 |
| <i>circWDR49</i> | miR-2278              | 4 |
| <i>circWDR49</i> | miR-2355-5p           | 4 |
| <i>circWDR49</i> | miR-2467-3p           | 2 |
| <i>circWDR49</i> | miR-26-5p             | 4 |
| <i>circWDR49</i> | miR-27b-5p            | 1 |
| <i>circWDR49</i> | miR-2861              | 1 |
| <i>circWDR49</i> | miR-297               | 2 |
| <i>circWDR49</i> | miR-298               | 5 |
| <i>circWDR49</i> | miR-299-5p            | 1 |
| <i>circWDR49</i> | miR-29a-5p            | 1 |
| <i>circWDR49</i> | miR-29b-1-5p          | 1 |
| <i>circWDR49</i> | miR-29b-2-5p          | 1 |
| <i>circWDR49</i> | miR-30-3p             | 1 |
| <i>circWDR49</i> | miR-30-5p             | 1 |
| <i>circWDR49</i> | miR-302c-5p           | 1 |
| <i>circWDR49</i> | miR-302f              | 1 |
| <i>circWDR49</i> | miR-3064-3p           | 6 |
| <i>circWDR49</i> | miR-31-5p             | 4 |
| <i>circWDR49</i> | miR-3115              | 5 |
| <i>circWDR49</i> | miR-3119              | 3 |
| <i>circWDR49</i> | miR-3121-3p           | 3 |
| <i>circWDR49</i> | miR-3121-5p           | 3 |
| <i>circWDR49</i> | miR-3124-3p           | 1 |
| <i>circWDR49</i> | miR-3125/3916/6859-5p | 1 |
| <i>circWDR49</i> | miR-3133              | 6 |
| <i>circWDR49</i> | miR-3136-3p/7155-3p   | 2 |
| <i>circWDR49</i> | miR-3140-3p           | 4 |
| <i>circWDR49</i> | miR-3145-3p           | 7 |
| <i>circWDR49</i> | miR-3147              | 4 |
| <i>circWDR49</i> | miR-3148              | 5 |
| <i>circWDR49</i> | miR-3149              | 3 |
| <i>circWDR49</i> | miR-3150a-3p          | 6 |

|                  |                       |   |
|------------------|-----------------------|---|
| <i>circWDR49</i> | miR-3152-5p           | 1 |
| <i>circWDR49</i> | miR-3154              | 4 |
| <i>circWDR49</i> | miR-3157-5p           | 1 |
| <i>circWDR49</i> | miR-3160-3p           | 4 |
| <i>circWDR49</i> | miR-3169              | 1 |
| <i>circWDR49</i> | miR-3175              | 3 |
| <i>circWDR49</i> | miR-3179              | 2 |
| <i>circWDR49</i> | miR-3180-5p           | 5 |
| <i>circWDR49</i> | miR-3184-3p           | 2 |
| <i>circWDR49</i> | miR-3191-5p           | 3 |
| <i>circWDR49</i> | miR-3194-3p           | 1 |
| <i>circWDR49</i> | miR-3194-5p           | 1 |
| <i>circWDR49</i> | miR-3199/8052         | 4 |
| <i>circWDR49</i> | miR-320               | 3 |
| <i>circWDR49</i> | miR-3200-3p           | 1 |
| <i>circWDR49</i> | miR-3200-5p           | 1 |
| <i>circWDR49</i> | miR-3202              | 3 |
| <i>circWDR49</i> | miR-320e              | 6 |
| <i>circWDR49</i> | miR-323b-3p           | 2 |
| <i>circWDR49</i> | miR-326               | 4 |
| <i>circWDR49</i> | miR-328-3p            | 3 |
| <i>circWDR49</i> | miR-335-5p            | 2 |
| <i>circWDR49</i> | miR-338-3p            | 2 |
| <i>circWDR49</i> | miR-339-5p            | 1 |
| <i>circWDR49</i> | miR-33a-3p            | 4 |
| <i>circWDR49</i> | miR-345-5p            | 2 |
| <i>circWDR49</i> | miR-34a-3p            | 2 |
| <i>circWDR49</i> | miR-34b-3p            | 2 |
| <i>circWDR49</i> | miR-34c-3p            | 2 |
| <i>circWDR49</i> | miR-3607-3p           | 3 |
| <i>circWDR49</i> | miR-3611              | 4 |
| <i>circWDR49</i> | miR-3614-3p           | 2 |
| <i>circWDR49</i> | miR-3614-5p           | 1 |
| <i>circWDR49</i> | miR-3615              | 1 |
| <i>circWDR49</i> | miR-3617-3p           | 2 |
| <i>circWDR49</i> | miR-362-5p/500b-5p    | 3 |
| <i>circWDR49</i> | miR-3622a-3p/3622b-3p | 3 |
| <i>circWDR49</i> | miR-3646              | 1 |

|                  |                     |   |
|------------------|---------------------|---|
| <i>circWDR49</i> | miR-3651            | 1 |
| <i>circWDR49</i> | miR-3652/4430       | 2 |
| <i>circWDR49</i> | miR-3654            | 2 |
| <i>circWDR49</i> | miR-3657            | 1 |
| <i>circWDR49</i> | miR-3658            | 2 |
| <i>circWDR49</i> | miR-365a-5p/365b-5p | 4 |
| <i>circWDR49</i> | miR-3660/4526       | 1 |
| <i>circWDR49</i> | miR-3667-5p         | 1 |
| <i>circWDR49</i> | miR-3670            | 2 |
| <i>circWDR49</i> | miR-3675-5p         | 3 |
| <i>circWDR49</i> | miR-3677-5p         | 3 |
| <i>circWDR49</i> | miR-3679-3p         | 2 |
| <i>circWDR49</i> | miR-3680-3p         | 2 |
| <i>circWDR49</i> | miR-3682-3p         | 1 |
| <i>circWDR49</i> | miR-3691-5p         | 4 |
| <i>circWDR49</i> | miR-3692-3p         | 2 |
| <i>circWDR49</i> | miR-3692-5p         | 4 |
| <i>circWDR49</i> | miR-370-3p          | 4 |
| <i>circWDR49</i> | miR-3714            | 4 |
| <i>circWDR49</i> | miR-374a-3p         | 1 |
| <i>circWDR49</i> | miR-375             | 2 |
| <i>circWDR49</i> | miR-376b-5p/376c-5p | 5 |
| <i>circWDR49</i> | miR-378g            | 3 |
| <i>circWDR49</i> | miR-378j/6839-5p    | 3 |
| <i>circWDR49</i> | miR-3908            | 2 |
| <i>circWDR49</i> | miR-3910            | 4 |
| <i>circWDR49</i> | miR-3911            | 1 |
| <i>circWDR49</i> | miR-3912-3p         | 1 |
| <i>circWDR49</i> | miR-3912-5p         | 5 |
| <i>circWDR49</i> | miR-3914            | 2 |
| <i>circWDR49</i> | miR-3918            | 1 |
| <i>circWDR49</i> | miR-3929/4419b/4478 | 2 |
| <i>circWDR49</i> | miR-3938            | 1 |
| <i>circWDR49</i> | miR-3942-3p         | 5 |
| <i>circWDR49</i> | miR-3942-5p         | 2 |
| <i>circWDR49</i> | miR-3945            | 1 |
| <i>circWDR49</i> | miR-3973            | 2 |
| <i>circWDR49</i> | miR-409-3p          | 5 |



|                  |                    |   |
|------------------|--------------------|---|
| <i>circWDR49</i> | miR-409-5p         | 2 |
| <i>circWDR49</i> | miR-411-3p         | 2 |
| <i>circWDR49</i> | miR-4252           | 3 |
| <i>circWDR49</i> | miR-4253/6862-5p   | 1 |
| <i>circWDR49</i> | miR-4256           | 1 |
| <i>circWDR49</i> | miR-4260           | 5 |
| <i>circWDR49</i> | miR-4265/4296/4322 | 2 |
| <i>circWDR49</i> | miR-4267           | 3 |
| <i>circWDR49</i> | miR-4269/6715b-5p  | 2 |
| <i>circWDR49</i> | miR-4274           | 3 |
| <i>circWDR49</i> | miR-4275           | 2 |
| <i>circWDR49</i> | miR-4280           | 1 |
| <i>circWDR49</i> | miR-4286           | 2 |
| <i>circWDR49</i> | miR-4289           | 1 |
| <i>circWDR49</i> | miR-4291           | 1 |
| <i>circWDR49</i> | miR-4297/5581-5p   | 1 |
| <i>circWDR49</i> | miR-4302           | 1 |
| <i>circWDR49</i> | miR-4312           | 1 |
| <i>circWDR49</i> | miR-4314           | 3 |
| <i>circWDR49</i> | miR-4317           | 3 |
| <i>circWDR49</i> | miR-432-5p         | 1 |
| <i>circWDR49</i> | miR-4327           | 2 |
| <i>circWDR49</i> | miR-4328           | 1 |
| <i>circWDR49</i> | miR-4423-5p        | 4 |
| <i>circWDR49</i> | miR-4425           | 4 |
| <i>circWDR49</i> | miR-4432           | 4 |
| <i>circWDR49</i> | miR-4433b-3p       | 1 |
| <i>circWDR49</i> | miR-4436b-5p       | 2 |
| <i>circWDR49</i> | miR-4438           | 2 |
| <i>circWDR49</i> | miR-4445-5p        | 2 |
| <i>circWDR49</i> | miR-4446-5p        | 2 |
| <i>circWDR49</i> | miR-4450           | 3 |
| <i>circWDR49</i> | miR-4453/4538      | 3 |
| <i>circWDR49</i> | miR-4455           | 1 |
| <i>circWDR49</i> | miR-4457           | 1 |
| <i>circWDR49</i> | miR-4462           | 1 |
| <i>circWDR49</i> | miR-4464/4748      | 4 |
| <i>circWDR49</i> | miR-4473           | 2 |

|                  |                       |   |
|------------------|-----------------------|---|
| <i>circWDR49</i> | miR-4474-3p           | 2 |
| <i>circWDR49</i> | miR-4475              | 1 |
| <i>circWDR49</i> | miR-4476/6876-5p      | 3 |
| <i>circWDR49</i> | miR-4480              | 3 |
| <i>circWDR49</i> | miR-4484              | 1 |
| <i>circWDR49</i> | miR-4485-3p           | 1 |
| <i>circWDR49</i> | miR-4486              | 3 |
| <i>circWDR49</i> | miR-4487              | 4 |
| <i>circWDR49</i> | miR-4495              | 1 |
| <i>circWDR49</i> | miR-449c-3p           | 3 |
| <i>circWDR49</i> | miR-4501              | 4 |
| <i>circWDR49</i> | miR-4502              | 1 |
| <i>circWDR49</i> | miR-4505/5787         | 2 |
| <i>circWDR49</i> | miR-450a-2-3p         | 5 |
| <i>circWDR49</i> | miR-450b-5p           | 2 |
| <i>circWDR49</i> | miR-4512              | 1 |
| <i>circWDR49</i> | miR-4514/4692         | 2 |
| <i>circWDR49</i> | miR-4515              | 1 |
| <i>circWDR49</i> | miR-4517              | 5 |
| <i>circWDR49</i> | miR-4519              | 3 |
| <i>circWDR49</i> | miR-451b              | 3 |
| <i>circWDR49</i> | miR-452-3p            | 5 |
| <i>circWDR49</i> | miR-452-5p/892-3p     | 1 |
| <i>circWDR49</i> | miR-4522              | 1 |
| <i>circWDR49</i> | miR-4524-5p           | 2 |
| <i>circWDR49</i> | miR-4528              | 3 |
| <i>circWDR49</i> | miR-4530              | 2 |
| <i>circWDR49</i> | miR-4533              | 3 |
| <i>circWDR49</i> | miR-4633-5p           | 1 |
| <i>circWDR49</i> | miR-4635              | 4 |
| <i>circWDR49</i> | miR-4638-5p           | 1 |
| <i>circWDR49</i> | miR-4639-3p           | 1 |
| <i>circWDR49</i> | miR-4640-5p           | 3 |
| <i>circWDR49</i> | miR-4641              | 1 |
| <i>circWDR49</i> | miR-4650-5p           | 2 |
| <i>circWDR49</i> | miR-4659a-5p/4659b-5p | 2 |
| <i>circWDR49</i> | miR-4662a-3p          | 2 |
| <i>circWDR49</i> | miR-4666b             | 4 |

|                  |                          |   |
|------------------|--------------------------|---|
| <i>circWDR49</i> | miR-4667-5p/4700-5p/8089 | 1 |
| <i>circWDR49</i> | miR-4669                 | 1 |
| <i>circWDR49</i> | miR-4671-3p              | 2 |
| <i>circWDR49</i> | miR-4685-5p/6837-5p      | 1 |
| <i>circWDR49</i> | miR-4686                 | 2 |
| <i>circWDR49</i> | miR-4690-5p              | 1 |
| <i>circWDR49</i> | miR-4691-3p              | 4 |
| <i>circWDR49</i> | miR-4699-5p              | 6 |
| <i>circWDR49</i> | miR-4704-3p              | 1 |
| <i>circWDR49</i> | miR-4704-5p              | 2 |
| <i>circWDR49</i> | miR-4715-3p              | 2 |
| <i>circWDR49</i> | miR-4719                 | 5 |
| <i>circWDR49</i> | miR-4722-5p              | 1 |
| <i>circWDR49</i> | miR-4725-5p              | 1 |
| <i>circWDR49</i> | miR-4726-3p              | 1 |
| <i>circWDR49</i> | miR-4729                 | 2 |
| <i>circWDR49</i> | miR-4731-3p/4801         | 1 |
| <i>circWDR49</i> | miR-4733-3p              | 1 |
| <i>circWDR49</i> | miR-4740-5p              | 1 |
| <i>circWDR49</i> | miR-4742-5p              | 2 |
| <i>circWDR49</i> | miR-4753-3p              | 1 |
| <i>circWDR49</i> | miR-4755-5p/5006-3p      | 1 |
| <i>circWDR49</i> | miR-4759                 | 1 |
| <i>circWDR49</i> | miR-4760-3p              | 2 |
| <i>circWDR49</i> | miR-4762-5p              | 2 |
| <i>circWDR49</i> | miR-4763-5p              | 4 |
| <i>circWDR49</i> | miR-4764-5p              | 4 |
| <i>circWDR49</i> | miR-4766-5p              | 2 |
| <i>circWDR49</i> | miR-4774-3p              | 1 |
| <i>circWDR49</i> | miR-4776-3p              | 6 |
| <i>circWDR49</i> | miR-4780                 | 1 |
| <i>circWDR49</i> | miR-4781-3p              | 5 |
| <i>circWDR49</i> | miR-4788                 | 1 |
| <i>circWDR49</i> | miR-4793-5p              | 3 |
| <i>circWDR49</i> | miR-4796-3p              | 3 |
| <i>circWDR49</i> | miR-4799-5p              | 1 |
| <i>circWDR49</i> | miR-4804-5p              | 1 |
| <i>circWDR49</i> | miR-484/3155             | 2 |

|                  |                     |   |
|------------------|---------------------|---|
| <i>circWDR49</i> | miR-486-3p          | 2 |
| <i>circWDR49</i> | miR-488-3p          | 3 |
| <i>circWDR49</i> | miR-490-5p          | 5 |
| <i>circWDR49</i> | miR-491-3p          | 1 |
| <i>circWDR49</i> | miR-492             | 1 |
| <i>circWDR49</i> | miR-493-3p          | 5 |
| <i>circWDR49</i> | miR-494-3p          | 3 |
| <i>circWDR49</i> | miR-498             | 2 |
| <i>circWDR49</i> | miR-499a-3p/499b-3p | 1 |
| <i>circWDR49</i> | miR-5000-3p         | 1 |
| <i>circWDR49</i> | miR-5003-3p         | 2 |
| <i>circWDR49</i> | miR-5007-3p         | 1 |
| <i>circWDR49</i> | miR-500a-5p         | 2 |
| <i>circWDR49</i> | miR-501-5p          | 3 |
| <i>circWDR49</i> | miR-5011-3p         | 4 |
| <i>circWDR49</i> | miR-503-3p          | 1 |
| <i>circWDR49</i> | miR-503-5p          | 2 |
| <i>circWDR49</i> | miR-507/557         | 2 |
| <i>circWDR49</i> | miR-508-3p          | 2 |
| <i>circWDR49</i> | miR-5087            | 2 |
| <i>circWDR49</i> | miR-509-3p          | 2 |
| <i>circWDR49</i> | miR-5095/7151-3p    | 3 |
| <i>circWDR49</i> | miR-5096            | 3 |
| <i>circWDR49</i> | miR-512-5p          | 3 |
| <i>circWDR49</i> | miR-513b-5p         | 4 |
| <i>circWDR49</i> | miR-513c-5p/514b-5p | 1 |
| <i>circWDR49</i> | miR-515-5p/519e-5p  | 2 |
| <i>circWDR49</i> | miR-518-3p          | 1 |
| <i>circWDR49</i> | miR-518a-5p/527     | 1 |
| <i>circWDR49</i> | miR-518c-5p         | 4 |
| <i>circWDR49</i> | miR-5191            | 1 |
| <i>circWDR49</i> | miR-5192            | 4 |
| <i>circWDR49</i> | miR-5196-3p         | 3 |
| <i>circWDR49</i> | miR-5197-3p         | 8 |
| <i>circWDR49</i> | miR-519d-5p         | 3 |
| <i>circWDR49</i> | miR-520f-5p         | 1 |
| <i>circWDR49</i> | miR-520g-3p         | 2 |
| <i>circWDR49</i> | miR-520g-5p         | 1 |

|                  |                                                                  |   |
|------------------|------------------------------------------------------------------|---|
| <i>circWDR49</i> | miR-525-5p                                                       | 7 |
| <i>circWDR49</i> | miR-532-5p                                                       | 1 |
| <i>circWDR49</i> | miR-548al/4445-3p                                                | 1 |
| <i>circWDR49</i> | miR-548an                                                        | 1 |
| <i>circWDR49</i> | miR-548ao-3p                                                     | 1 |
| <i>circWDR49</i> | miR-548at-5p                                                     | 1 |
| <i>circWDR49</i> | miR-548av-5p/548k/8054                                           | 1 |
| <i>circWDR49</i> | miR-548aw                                                        | 1 |
| <i>circWDR49</i> | miR-548ay-5p/548au-5p/548as-5p/548ar-5p/548aq-5p/548ap-5p/548am- | 3 |
| <i>circWDR49</i> | miR-548az-5p/548t-5p                                             | 3 |
| <i>circWDR49</i> | miR-548l                                                         | 1 |
| <i>circWDR49</i> | miR-548m                                                         | 2 |
| <i>circWDR49</i> | miR-548n                                                         | 3 |
| <i>circWDR49</i> | miR-552-3p                                                       | 1 |
| <i>circWDR49</i> | miR-556-5p                                                       | 1 |
| <i>circWDR49</i> | miR-5571-5p                                                      | 4 |
| <i>circWDR49</i> | miR-5572                                                         | 5 |
| <i>circWDR49</i> | miR-5579-3p                                                      | 1 |
| <i>circWDR49</i> | miR-5579-5p                                                      | 1 |
| <i>circWDR49</i> | miR-558                                                          | 4 |
| <i>circWDR49</i> | miR-5580-5p                                                      | 1 |
| <i>circWDR49</i> | miR-5583-3p                                                      | 5 |
| <i>circWDR49</i> | miR-5588-3p                                                      | 1 |
| <i>circWDR49</i> | miR-5590-5p                                                      | 2 |
| <i>circWDR49</i> | miR-561-3p                                                       | 1 |
| <i>circWDR49</i> | miR-561-5p                                                       | 2 |
| <i>circWDR49</i> | miR-564                                                          | 2 |
| <i>circWDR49</i> | miR-567                                                          | 2 |
| <i>circWDR49</i> | miR-5683                                                         | 2 |
| <i>circWDR49</i> | miR-5690                                                         | 1 |
| <i>circWDR49</i> | miR-5691                                                         | 2 |
| <i>circWDR49</i> | miR-5692a                                                        | 1 |
| <i>circWDR49</i> | miR-5693                                                         | 4 |
| <i>circWDR49</i> | miR-5695                                                         | 3 |
| <i>circWDR49</i> | miR-5696                                                         | 4 |
| <i>circWDR49</i> | miR-5697                                                         | 5 |
| <i>circWDR49</i> | miR-5700                                                         | 1 |
| <i>circWDR49</i> | miR-5701                                                         | 3 |

|                  |                                      |   |
|------------------|--------------------------------------|---|
| <i>circWDR49</i> | miR-579-3p                           | 4 |
| <i>circWDR49</i> | miR-580-3p                           | 3 |
| <i>circWDR49</i> | miR-582-3p                           | 3 |
| <i>circWDR49</i> | miR-586                              | 1 |
| <i>circWDR49</i> | miR-593-3p                           | 2 |
| <i>circWDR49</i> | miR-600                              | 2 |
| <i>circWDR49</i> | miR-601                              | 1 |
| <i>circWDR49</i> | miR-605-5p                           | 2 |
| <i>circWDR49</i> | miR-6071                             | 2 |
| <i>circWDR49</i> | miR-6074                             | 1 |
| <i>circWDR49</i> | miR-6077                             | 2 |
| <i>circWDR49</i> | miR-6079                             | 6 |
| <i>circWDR49</i> | miR-6080                             | 2 |
| <i>circWDR49</i> | miR-6081                             | 1 |
| <i>circWDR49</i> | miR-609                              | 1 |
| <i>circWDR49</i> | miR-6090                             | 3 |
| <i>circWDR49</i> | miR-612/1285-3p/3187-5p/5189-5p/6860 | 3 |
| <i>circWDR49</i> | miR-6124                             | 5 |
| <i>circWDR49</i> | miR-6126                             | 4 |
| <i>circWDR49</i> | miR-616-3p                           | 1 |
| <i>circWDR49</i> | miR-6165                             | 1 |
| <i>circWDR49</i> | miR-617                              | 9 |
| <i>circWDR49</i> | miR-621                              | 1 |
| <i>circWDR49</i> | miR-624-3p                           | 2 |
| <i>circWDR49</i> | miR-625-3p                           | 1 |
| <i>circWDR49</i> | miR-626/6876-3p                      | 3 |
| <i>circWDR49</i> | miR-629-3p                           | 1 |
| <i>circWDR49</i> | miR-633                              | 1 |
| <i>circWDR49</i> | miR-634                              | 3 |
| <i>circWDR49</i> | miR-637                              | 1 |
| <i>circWDR49</i> | miR-640                              | 3 |
| <i>circWDR49</i> | miR-644a                             | 1 |
| <i>circWDR49</i> | miR-646                              | 2 |
| <i>circWDR49</i> | miR-648                              | 1 |
| <i>circWDR49</i> | miR-6500-3p                          | 1 |
| <i>circWDR49</i> | miR-6501-3p                          | 3 |
| <i>circWDR49</i> | miR-6501-5p                          | 4 |
| <i>circWDR49</i> | miR-6505-3p                          | 9 |

|                  |                     |   |
|------------------|---------------------|---|
| <i>circWDR49</i> | miR-6508-3p         | 3 |
| <i>circWDR49</i> | miR-6509-3p         | 2 |
| <i>circWDR49</i> | miR-6510-5p         | 1 |
| <i>circWDR49</i> | miR-6515-3p         | 5 |
| <i>circWDR49</i> | miR-656-3p          | 2 |
| <i>circWDR49</i> | miR-659-3p          | 2 |
| <i>circWDR49</i> | miR-659-5p          | 1 |
| <i>circWDR49</i> | miR-663b            | 2 |
| <i>circWDR49</i> | miR-664a-3p         | 1 |
| <i>circWDR49</i> | miR-668-3p          | 1 |
| <i>circWDR49</i> | miR-670-3p          | 1 |
| <i>circWDR49</i> | miR-670-5p          | 1 |
| <i>circWDR49</i> | miR-6715b-3p        | 2 |
| <i>circWDR49</i> | miR-6719-3p         | 1 |
| <i>circWDR49</i> | miR-6721-5p         | 3 |
| <i>circWDR49</i> | miR-6730-3p         | 1 |
| <i>circWDR49</i> | miR-6733-3p         | 1 |
| <i>circWDR49</i> | miR-6735-3p         | 6 |
| <i>circWDR49</i> | miR-6736-3p         | 1 |
| <i>circWDR49</i> | miR-6741-5p         | 4 |
| <i>circWDR49</i> | miR-6744-5p         | 2 |
| <i>circWDR49</i> | miR-6748-5p         | 4 |
| <i>circWDR49</i> | miR-675-3p          | 2 |
| <i>circWDR49</i> | miR-6755-3p         | 1 |
| <i>circWDR49</i> | miR-6758-3p         | 2 |
| <i>circWDR49</i> | miR-6758-5p/6856-5p | 1 |
| <i>circWDR49</i> | miR-6759-3p         | 1 |
| <i>circWDR49</i> | miR-6759-5p         | 2 |
| <i>circWDR49</i> | miR-676-3p          | 1 |
| <i>circWDR49</i> | miR-6762-5p/6845-5p | 1 |
| <i>circWDR49</i> | miR-6764-3p/6824-3p | 4 |
| <i>circWDR49</i> | miR-6765-3p         | 3 |
| <i>circWDR49</i> | miR-6767-5p         | 3 |
| <i>circWDR49</i> | miR-6768-3p         | 1 |
| <i>circWDR49</i> | miR-6772-5p         | 1 |
| <i>circWDR49</i> | miR-6777-3p         | 2 |
| <i>circWDR49</i> | miR-6780b-3p        | 1 |
| <i>circWDR49</i> | miR-6787-3p         | 3 |

|                  |             |   |
|------------------|-------------|---|
| <i>circWDR49</i> | miR-6793-5p | 4 |
| <i>circWDR49</i> | miR-6794-3p | 1 |
| <i>circWDR49</i> | miR-6796-3p | 1 |
| <i>circWDR49</i> | miR-6796-5p | 2 |
| <i>circWDR49</i> | miR-6804-5p | 1 |
| <i>circWDR49</i> | miR-6809-5p | 4 |
| <i>circWDR49</i> | miR-6810-5p | 6 |
| <i>circWDR49</i> | miR-6811-3p | 1 |
| <i>circWDR49</i> | miR-6813-3p | 1 |
| <i>circWDR49</i> | miR-6814-5p | 2 |
| <i>circWDR49</i> | miR-6815-3p | 2 |
| <i>circWDR49</i> | miR-6816-3p | 2 |
| <i>circWDR49</i> | miR-6817-3p | 2 |
| <i>circWDR49</i> | miR-6818-3p | 2 |
| <i>circWDR49</i> | miR-6823-5p | 1 |
| <i>circWDR49</i> | miR-6825-5p | 3 |
| <i>circWDR49</i> | miR-6828-3p | 2 |
| <i>circWDR49</i> | miR-6830-5p | 7 |
| <i>circWDR49</i> | miR-6834-3p | 2 |
| <i>circWDR49</i> | miR-6836-3p | 1 |
| <i>circWDR49</i> | miR-6840-3p | 1 |
| <i>circWDR49</i> | miR-6851-3p | 1 |
| <i>circWDR49</i> | miR-6854-5p | 1 |
| <i>circWDR49</i> | miR-6856-3p | 3 |
| <i>circWDR49</i> | miR-6857-5p | 6 |
| <i>circWDR49</i> | miR-6861-3p | 1 |
| <i>circWDR49</i> | miR-6864-5p | 4 |
| <i>circWDR49</i> | miR-6871-5p | 4 |
| <i>circWDR49</i> | miR-6873-5p | 1 |
| <i>circWDR49</i> | miR-6874-5p | 2 |
| <i>circWDR49</i> | miR-6879-3p | 2 |
| <i>circWDR49</i> | miR-6882-5p | 3 |
| <i>circWDR49</i> | miR-6883-3p | 1 |
| <i>circWDR49</i> | miR-6884-3p | 1 |
| <i>circWDR49</i> | miR-6886-3p | 1 |
| <i>circWDR49</i> | miR-6886-5p | 1 |
| <i>circWDR49</i> | miR-6890-5p | 3 |
| <i>circWDR49</i> | miR-6895-3p | 2 |



|                  |              |   |
|------------------|--------------|---|
| <i>circWDR49</i> | miR-6895-5p  | 1 |
| <i>circWDR49</i> | miR-7-3p     | 1 |
| <i>circWDR49</i> | miR-7-5p     | 2 |
| <i>circWDR49</i> | miR-7108-5p  | 2 |
| <i>circWDR49</i> | miR-7109-3p  | 2 |
| <i>circWDR49</i> | miR-7110-3p  | 2 |
| <i>circWDR49</i> | miR-7113-5p  | 1 |
| <i>circWDR49</i> | miR-7114-5p  | 5 |
| <i>circWDR49</i> | miR-7155-5p  | 1 |
| <i>circWDR49</i> | miR-7158-5p  | 2 |
| <i>circWDR49</i> | miR-7160-3p  | 1 |
| <i>circWDR49</i> | miR-744-3p   | 2 |
| <i>circWDR49</i> | miR-7515     | 2 |
| <i>circWDR49</i> | miR-7641     | 2 |
| <i>circWDR49</i> | miR-767-3p   | 2 |
| <i>circWDR49</i> | miR-7705     | 1 |
| <i>circWDR49</i> | miR-7843-3p  | 5 |
| <i>circWDR49</i> | miR-7844-5p  | 5 |
| <i>circWDR49</i> | miR-7849-3p  | 2 |
| <i>circWDR49</i> | miR-7855-5p  | 1 |
| <i>circWDR49</i> | miR-7977     | 1 |
| <i>circWDR49</i> | miR-8056     | 4 |
| <i>circWDR49</i> | miR-8060     | 1 |
| <i>circWDR49</i> | miR-8062     | 1 |
| <i>circWDR49</i> | miR-8066     | 1 |
| <i>circWDR49</i> | miR-8068     | 2 |
| <i>circWDR49</i> | miR-8074     | 2 |
| <i>circWDR49</i> | miR-8076     | 5 |
| <i>circWDR49</i> | miR-8080     | 2 |
| <i>circWDR49</i> | miR-8083     | 1 |
| <i>circWDR49</i> | miR-8084     | 2 |
| <i>circWDR49</i> | miR-8086     | 2 |
| <i>circWDR49</i> | miR-8087     | 4 |
| <i>circWDR49</i> | miR-873-5p.2 | 1 |
| <i>circWDR49</i> | miR-885-3p   | 1 |
| <i>circWDR49</i> | miR-885-5p   | 4 |
| <i>circWDR49</i> | miR-887-3p   | 2 |
| <i>circWDR49</i> | miR-889-3p   | 1 |

|                  |                              |   |
|------------------|------------------------------|---|
| <i>circWDR49</i> | miR-889-5p                   | 3 |
| <i>circWDR49</i> | miR-891a-5p                  | 1 |
| <i>circWDR49</i> | miR-920/4300/5591-5p/6726-5p | 3 |
| <i>circWDR49</i> | miR-922                      | 1 |
| <i>circWDR49</i> | miR-92a-1-5p                 | 2 |
| <i>circWDR49</i> | miR-93-3p                    | 4 |
| <i>circWDR49</i> | miR-938                      | 1 |
| <i>circWDR49</i> | miR-939-5p/1343-5p           | 3 |
| <i>circWDR49</i> | miR-95-5p                    | 2 |
| <i>circWDR49</i> | miR-96-5p/1271-5p            | 2 |
| <i>circWDR49</i> | miR-99-3p                    | 1 |
| <i>circWDR49</i> | miR-4277                     | 1 |
| <i>circWDR49</i> | miR-4493                     | 3 |
| <i>circWDR49</i> | miR-5000-5p                  | 1 |
| <i>circWDR49</i> | miR-605-3p                   | 3 |
| <i>circWDR49</i> | miR-1247-3p                  | 1 |
| <i>circWDR49</i> | miR-1292-5p                  | 1 |
| <i>circWDR49</i> | miR-152-5p                   | 1 |
| <i>circWDR49</i> | miR-182-3p                   | 1 |
| <i>circWDR49</i> | miR-203a-3p.1                | 1 |
| <i>circWDR49</i> | miR-218-1-3p                 | 1 |
| <i>circWDR49</i> | miR-218-2-3p                 | 1 |
| <i>circWDR49</i> | miR-23-3p                    | 1 |
| <i>circWDR49</i> | miR-27-3p                    | 3 |
| <i>circWDR49</i> | miR-342-3p                   | 2 |
| <i>circWDR49</i> | miR-3680-5p                  | 1 |
| <i>circWDR49</i> | miR-3928-5p/6806-3p          | 1 |
| <i>circWDR49</i> | miR-4468                     | 1 |
| <i>circWDR49</i> | miR-4471/8059                | 1 |
| <i>circWDR49</i> | miR-4481/4745-5p             | 1 |
| <i>circWDR49</i> | miR-4524b-3p                 | 1 |
| <i>circWDR49</i> | miR-4717-3p                  | 1 |
| <i>circWDR49</i> | miR-4798-3p                  | 1 |
| <i>circWDR49</i> | miR-4802-3p                  | 1 |
| <i>circWDR49</i> | miR-4999-3p                  | 1 |
| <i>circWDR49</i> | miR-5002-5p                  | 1 |
| <i>circWDR49</i> | miR-513a-5p                  | 3 |
| <i>circWDR49</i> | miR-513b-3p                  | 1 |

|                  |                          |   |
|------------------|--------------------------|---|
| <i>circWDR49</i> | miR-548u/7161-5p         | 1 |
| <i>circWDR49</i> | miR-568                  | 1 |
| <i>circWDR49</i> | miR-597-3p               | 1 |
| <i>circWDR49</i> | miR-641/3617-5p          | 2 |
| <i>circWDR49</i> | miR-643                  | 1 |
| <i>circWDR49</i> | miR-6812-3p              | 1 |
| <i>circWDR49</i> | miR-6827-5p              | 3 |
| <i>circWDR49</i> | miR-1200                 | 2 |
| <i>circWDR49</i> | miR-1202/3972            | 2 |
| <i>circWDR49</i> | miR-1251-3p              | 4 |
| <i>circWDR49</i> | miR-1267                 | 2 |
| <i>circWDR49</i> | miR-1283                 | 5 |
| <i>circWDR49</i> | miR-1284                 | 2 |
| <i>circWDR49</i> | miR-1301-3p              | 4 |
| <i>circWDR49</i> | miR-1304-5p              | 1 |
| <i>circWDR49</i> | miR-1324                 | 4 |
| <i>circWDR49</i> | miR-135a-3p              | 2 |
| <i>circWDR49</i> | miR-146-5p               | 3 |
| <i>circWDR49</i> | miR-1537-5p              | 2 |
| <i>circWDR49</i> | miR-18-5p                | 6 |
| <i>circWDR49</i> | miR-1827                 | 1 |
| <i>circWDR49</i> | miR-183-5p.2             | 2 |
| <i>circWDR49</i> | miR-2053                 | 5 |
| <i>circWDR49</i> | miR-20a-3p               | 2 |
| <i>circWDR49</i> | miR-211-3p               | 3 |
| <i>circWDR49</i> | miR-219a-2-3p            | 5 |
| <i>circWDR49</i> | miR-219b-3p              | 5 |
| <i>circWDR49</i> | miR-3153/6733-5p/6739-5p | 4 |
| <i>circWDR49</i> | miR-3162-5p              | 4 |
| <i>circWDR49</i> | miR-33-5p                | 2 |
| <i>circWDR49</i> | miR-3529-3p              | 5 |
| <i>circWDR49</i> | miR-3622a-5p             | 2 |
| <i>circWDR49</i> | miR-367-5p               | 2 |
| <i>circWDR49</i> | miR-3682-5p              | 3 |
| <i>circWDR49</i> | miR-3688-5p              | 2 |
| <i>circWDR49</i> | miR-376c-3p              | 2 |
| <i>circWDR49</i> | miR-378a-5p              | 2 |
| <i>circWDR49</i> | miR-3926                 | 2 |

|                  |                     |   |
|------------------|---------------------|---|
| <i>circWDR49</i> | miR-4251            | 4 |
| <i>circWDR49</i> | miR-4261            | 4 |
| <i>circWDR49</i> | miR-4324            | 2 |
| <i>circWDR49</i> | miR-4329            | 4 |
| <i>circWDR49</i> | miR-4461            | 1 |
| <i>circWDR49</i> | miR-4524a-3p        | 1 |
| <i>circWDR49</i> | miR-4660            | 4 |
| <i>circWDR49</i> | miR-4668-5p         | 4 |
| <i>circWDR49</i> | miR-4703-3p         | 2 |
| <i>circWDR49</i> | miR-4708-3p         | 3 |
| <i>circWDR49</i> | miR-4718            | 2 |
| <i>circWDR49</i> | miR-4738-3p         | 4 |
| <i>circWDR49</i> | miR-4747-5p/5196-5p | 2 |
| <i>circWDR49</i> | miR-4761-5p         | 2 |
| <i>circWDR49</i> | miR-4999-5p         | 2 |
| <i>circWDR49</i> | miR-5003-5p         | 1 |
| <i>circWDR49</i> | miR-5006-5p         | 2 |
| <i>circWDR49</i> | miR-5007-5p         | 5 |
| <i>circWDR49</i> | miR-506-5p          | 3 |
| <i>circWDR49</i> | miR-544b            | 2 |
| <i>circWDR49</i> | miR-5582-5p         | 2 |
| <i>circWDR49</i> | miR-5584-5p         | 4 |
| <i>circWDR49</i> | miR-569             | 5 |
| <i>circWDR49</i> | miR-5702            | 3 |
| <i>circWDR49</i> | miR-589-5p          | 3 |
| <i>circWDR49</i> | miR-593-5p          | 2 |
| <i>circWDR49</i> | miR-606             | 5 |
| <i>circWDR49</i> | miR-635/6774-5p     | 2 |
| <i>circWDR49</i> | miR-653-5p          | 2 |
| <i>circWDR49</i> | miR-671-5p          | 5 |
| <i>circWDR49</i> | miR-6724-5p/6773-5p | 2 |
| <i>circWDR49</i> | miR-6741-3p         | 1 |
| <i>circWDR49</i> | miR-6750-3p         | 2 |
| <i>circWDR49</i> | miR-6750-5p/6822-5p | 4 |
| <i>circWDR49</i> | miR-6761-5p         | 4 |
| <i>circWDR49</i> | miR-6765-5p         | 1 |
| <i>circWDR49</i> | miR-6804-3p         | 2 |
| <i>circWDR49</i> | miR-6828-5p         | 5 |

|                  |                                       |   |
|------------------|---------------------------------------|---|
| <i>circWDR49</i> | miR-6838-3p                           | 2 |
| <i>circWDR49</i> | miR-6853-5p                           | 2 |
| <i>circWDR49</i> | miR-7151-5p                           | 2 |
| <i>circWDR49</i> | miR-7156-3p                           | 4 |
| <i>circWDR49</i> | miR-8081                              | 2 |
| <i>circWDR49</i> | miR-891a-3p                           | 2 |
| <i>circWDR49</i> | miR-892-5p                            | 3 |
| <i>circWDR49</i> | miR-892b                              | 3 |
| <i>circWDR49</i> | miR-9500                              | 4 |
| <i>circWDR49</i> | miR-4670-3p                           | 1 |
| <i>circWDR78</i> | let-7-5p/98-5p                        | 2 |
| <i>circWDR78</i> | let-7a-2-3p/let-7g-3p                 | 1 |
| <i>circWDR78</i> | let-7a-3p/let-7b-3p/let-7f-1-3p/98-3p | 2 |
| <i>circWDR78</i> | let-7c-3p                             | 1 |
| <i>circWDR78</i> | let-7f-2-3p/1185-3p                   | 2 |
| <i>circWDR78</i> | miR-1-3p/206                          | 2 |
| <i>circWDR78</i> | miR-1-5p                              | 1 |
| <i>circWDR78</i> | miR-10-5p                             | 1 |
| <i>circWDR78</i> | miR-101-3p.1                          | 2 |
| <i>circWDR78</i> | miR-101-3p.2                          | 3 |
| <i>circWDR78</i> | miR-101-5p                            | 2 |
| <i>circWDR78</i> | miR-103-3p/107                        | 2 |
| <i>circWDR78</i> | miR-103a-2-5p                         | 3 |
| <i>circWDR78</i> | miR-103b                              | 1 |
| <i>circWDR78</i> | miR-105-5p                            | 5 |
| <i>circWDR78</i> | miR-106a-3p                           | 3 |
| <i>circWDR78</i> | miR-1178-3p                           | 1 |
| <i>circWDR78</i> | miR-1183                              | 4 |
| <i>circWDR78</i> | miR-1193                              | 1 |
| <i>circWDR78</i> | miR-1199-5p/6751-3p                   | 2 |
| <i>circWDR78</i> | miR-1202/3972                         | 3 |
| <i>circWDR78</i> | miR-1207-3p                           | 1 |
| <i>circWDR78</i> | miR-1208                              | 6 |
| <i>circWDR78</i> | miR-122-5p                            | 1 |
| <i>circWDR78</i> | miR-1224-3p                           | 1 |
| <i>circWDR78</i> | miR-1224-5p                           | 3 |
| <i>circWDR78</i> | miR-1225-3p                           | 1 |
| <i>circWDR78</i> | miR-1228-3p                           | 1 |

|                  |                          |    |
|------------------|--------------------------|----|
| <i>circWDR78</i> | miR-1229-3p              | 2  |
| <i>circWDR78</i> | miR-1236-3p              | 17 |
| <i>circWDR78</i> | miR-1237-3p              | 3  |
| <i>circWDR78</i> | miR-1238-3p              | 19 |
| <i>circWDR78</i> | miR-124-3p.1             | 2  |
| <i>circWDR78</i> | miR-124-3p.2/506-3p      | 1  |
| <i>circWDR78</i> | miR-124-5p               | 3  |
| <i>circWDR78</i> | miR-1243                 | 2  |
| <i>circWDR78</i> | miR-1244                 | 4  |
| <i>circWDR78</i> | miR-1245b-3p             | 1  |
| <i>circWDR78</i> | miR-1245b-5p             | 3  |
| <i>circWDR78</i> | miR-1248                 | 3  |
| <i>circWDR78</i> | miR-125-5p               | 1  |
| <i>circWDR78</i> | miR-1250-3p              | 3  |
| <i>circWDR78</i> | miR-1251-3p              | 1  |
| <i>circWDR78</i> | miR-1252-3p              | 1  |
| <i>circWDR78</i> | miR-1252-5p              | 5  |
| <i>circWDR78</i> | miR-1253                 | 2  |
| <i>circWDR78</i> | miR-1254/3116            | 7  |
| <i>circWDR78</i> | miR-1255a/1255b-5p       | 2  |
| <i>circWDR78</i> | miR-1255b-2-3p           | 1  |
| <i>circWDR78</i> | miR-1257                 | 3  |
| <i>circWDR78</i> | miR-1258                 | 3  |
| <i>circWDR78</i> | miR-125a-3p              | 1  |
| <i>circWDR78</i> | miR-125b-1-3p            | 1  |
| <i>circWDR78</i> | miR-125b-2-3p            | 1  |
| <i>circWDR78</i> | miR-126-5p               | 5  |
| <i>circWDR78</i> | miR-1260a/1260b          | 1  |
| <i>circWDR78</i> | miR-1261                 | 1  |
| <i>circWDR78</i> | miR-1262/4701-3p/6736-5p | 1  |
| <i>circWDR78</i> | miR-1263                 | 3  |
| <i>circWDR78</i> | miR-1264                 | 3  |
| <i>circWDR78</i> | miR-1265                 | 2  |
| <i>circWDR78</i> | miR-1266-3p              | 1  |
| <i>circWDR78</i> | miR-1266-5p/4518         | 1  |
| <i>circWDR78</i> | miR-1267                 | 2  |
| <i>circWDR78</i> | miR-1270                 | 1  |
| <i>circWDR78</i> | miR-1272                 | 2  |

|                  |                          |   |
|------------------|--------------------------|---|
| <i>circWDR78</i> | miR-1273e                | 2 |
| <i>circWDR78</i> | miR-1273g-3p             | 6 |
| <i>circWDR78</i> | miR-1273g-5p             | 3 |
| <i>circWDR78</i> | miR-1273h-3p             | 3 |
| <i>circWDR78</i> | miR-1276                 | 1 |
| <i>circWDR78</i> | miR-1277-5p              | 9 |
| <i>circWDR78</i> | miR-1278                 | 1 |
| <i>circWDR78</i> | miR-1279                 | 1 |
| <i>circWDR78</i> | miR-128-3p               | 3 |
| <i>circWDR78</i> | miR-1281                 | 1 |
| <i>circWDR78</i> | miR-1283                 | 3 |
| <i>circWDR78</i> | miR-1285-5p              | 2 |
| <i>circWDR78</i> | miR-1288-5p              | 2 |
| <i>circWDR78</i> | miR-129-3p               | 1 |
| <i>circWDR78</i> | miR-129-5p               | 6 |
| <i>circWDR78</i> | miR-1290                 | 4 |
| <i>circWDR78</i> | miR-1295a                | 1 |
| <i>circWDR78</i> | miR-1295b-5p/1912        | 1 |
| <i>circWDR78</i> | miR-1296-5p              | 2 |
| <i>circWDR78</i> | miR-1298-5p              | 1 |
| <i>circWDR78</i> | miR-130-3p/301-3p/454-3p | 2 |
| <i>circWDR78</i> | miR-1301-3p              | 1 |
| <i>circWDR78</i> | miR-1302/4298            | 1 |
| <i>circWDR78</i> | miR-1303                 | 2 |
| <i>circWDR78</i> | miR-1304-3p              | 5 |
| <i>circWDR78</i> | miR-1305                 | 4 |
| <i>circWDR78</i> | miR-1306-5p              | 5 |
| <i>circWDR78</i> | miR-130b-5p              | 5 |
| <i>circWDR78</i> | miR-132-3p/212-3p        | 2 |
| <i>circWDR78</i> | miR-1322                 | 2 |
| <i>circWDR78</i> | miR-1323                 | 7 |
| <i>circWDR78</i> | miR-1324                 | 1 |
| <i>circWDR78</i> | miR-133a-3p.2/133b       | 1 |
| <i>circWDR78</i> | miR-133a-5p              | 1 |
| <i>circWDR78</i> | miR-134-5p               | 2 |
| <i>circWDR78</i> | miR-1343-3p              | 2 |
| <i>circWDR78</i> | miR-135-5p               | 3 |
| <i>circWDR78</i> | miR-135b-3p              | 1 |

|                  |                                      |    |
|------------------|--------------------------------------|----|
| <i>circWDR78</i> | miR-138-2-3p                         | 2  |
| <i>circWDR78</i> | miR-138-5p                           | 1  |
| <i>circWDR78</i> | miR-139-5p                           | 3  |
| <i>circWDR78</i> | miR-140-3p.1                         | 2  |
| <i>circWDR78</i> | miR-140-3p.2                         | 2  |
| <i>circWDR78</i> | miR-140-5p                           | 3  |
| <i>circWDR78</i> | miR-141-3p/200-3p                    | 2  |
| <i>circWDR78</i> | miR-141-5p                           | 21 |
| <i>circWDR78</i> | miR-142-5p                           | 1  |
| <i>circWDR78</i> | miR-143-5p                           | 1  |
| <i>circWDR78</i> | miR-144-3p                           | 2  |
| <i>circWDR78</i> | miR-145-3p                           | 3  |
| <i>circWDR78</i> | miR-1468-3p                          | 6  |
| <i>circWDR78</i> | miR-1468-5p                          | 1  |
| <i>circWDR78</i> | miR-146a-3p                          | 3  |
| <i>circWDR78</i> | miR-1470                             | 2  |
| <i>circWDR78</i> | miR-147b                             | 1  |
| <i>circWDR78</i> | miR-148a-5p                          | 1  |
| <i>circWDR78</i> | miR-148b-5p/6874-3p                  | 1  |
| <i>circWDR78</i> | miR-149-5p                           | 2  |
| <i>circWDR78</i> | miR-15-5p/16-5p/195-5p/424-5p/497-5p | 2  |
| <i>circWDR78</i> | miR-150-3p                           | 3  |
| <i>circWDR78</i> | miR-150-5p                           | 3  |
| <i>circWDR78</i> | miR-151-3p                           | 1  |
| <i>circWDR78</i> | miR-152-5p                           | 2  |
| <i>circWDR78</i> | miR-153-3p                           | 2  |
| <i>circWDR78</i> | miR-1537-3p                          | 3  |
| <i>circWDR78</i> | miR-154-3p/487-3p                    | 3  |
| <i>circWDR78</i> | miR-1587/3620-5p                     | 1  |
| <i>circWDR78</i> | miR-15a-3p                           | 1  |
| <i>circWDR78</i> | miR-15b-3p                           | 4  |
| <i>circWDR78</i> | miR-16-1-3p                          | 2  |
| <i>circWDR78</i> | miR-16-2-3p/195-3p                   | 5  |
| <i>circWDR78</i> | miR-17-5p/20-5p/93-5p/106-5p/519-3p  | 2  |
| <i>circWDR78</i> | miR-181-3p/4420                      | 4  |
| <i>circWDR78</i> | miR-181a-2-3p                        | 2  |
| <i>circWDR78</i> | miR-182-3p                           | 1  |
| <i>circWDR78</i> | miR-1827                             | 1  |



|                  |                    |    |
|------------------|--------------------|----|
| <i>circWDR78</i> | miR-183-3p         | 1  |
| <i>circWDR78</i> | miR-183-5p.1       | 1  |
| <i>circWDR78</i> | miR-183-5p.2       | 2  |
| <i>circWDR78</i> | miR-185-3p         | 19 |
| <i>circWDR78</i> | miR-185-5p         | 1  |
| <i>circWDR78</i> | miR-186-5p         | 9  |
| <i>circWDR78</i> | miR-188-3p         | 1  |
| <i>circWDR78</i> | miR-18b-3p         | 1  |
| <i>circWDR78</i> | miR-19-3p          | 5  |
| <i>circWDR78</i> | miR-19-5p          | 1  |
| <i>circWDR78</i> | miR-1909-5p        | 1  |
| <i>circWDR78</i> | miR-190a-3p        | 3  |
| <i>circWDR78</i> | miR-1910-5p        | 1  |
| <i>circWDR78</i> | miR-1911-3p        | 1  |
| <i>circWDR78</i> | miR-1914-5p        | 1  |
| <i>circWDR78</i> | miR-1915-5p        | 1  |
| <i>circWDR78</i> | miR-192-5p/215-5p  | 5  |
| <i>circWDR78</i> | miR-193b-5p        | 1  |
| <i>circWDR78</i> | miR-194-3p         | 1  |
| <i>circWDR78</i> | miR-194-5p         | 2  |
| <i>circWDR78</i> | miR-196-5p         | 2  |
| <i>circWDR78</i> | miR-1972           | 1  |
| <i>circWDR78</i> | miR-1973           | 3  |
| <i>circWDR78</i> | miR-1976           | 1  |
| <i>circWDR78</i> | miR-199-3p         | 1  |
| <i>circWDR78</i> | miR-200-3p/429     | 3  |
| <i>circWDR78</i> | miR-200ab-5p       | 2  |
| <i>circWDR78</i> | miR-202-5p         | 6  |
| <i>circWDR78</i> | miR-203a-3p.1      | 2  |
| <i>circWDR78</i> | miR-203a-5p        | 3  |
| <i>circWDR78</i> | miR-203b-3p        | 4  |
| <i>circWDR78</i> | miR-204-3p/4646-5p | 9  |
| <i>circWDR78</i> | miR-205-3p         | 4  |
| <i>circWDR78</i> | miR-205-5p         | 2  |
| <i>circWDR78</i> | miR-2052           | 1  |
| <i>circWDR78</i> | miR-2053           | 3  |
| <i>circWDR78</i> | miR-2054           | 1  |
| <i>circWDR78</i> | miR-208-5p         | 3  |

|                  |                                     |   |
|------------------|-------------------------------------|---|
| <i>circWDR78</i> | miR-20b-3p                          | 6 |
| <i>circWDR78</i> | miR-21-5p/590-5p                    | 1 |
| <i>circWDR78</i> | miR-210-3p                          | 1 |
| <i>circWDR78</i> | miR-2113                            | 1 |
| <i>circWDR78</i> | miR-2114-3p                         | 1 |
| <i>circWDR78</i> | miR-2115-3p                         | 7 |
| <i>circWDR78</i> | miR-2115-5p                         | 4 |
| <i>circWDR78</i> | miR-2116-3p                         | 3 |
| <i>circWDR78</i> | miR-2117                            | 1 |
| <i>circWDR78</i> | miR-214-3p/3619-5p                  | 1 |
| <i>circWDR78</i> | miR-215-3p                          | 3 |
| <i>circWDR78</i> | miR-216a-5p                         | 1 |
| <i>circWDR78</i> | miR-216b-3p                         | 4 |
| <i>circWDR78</i> | miR-216b-5p                         | 1 |
| <i>circWDR78</i> | miR-217                             | 2 |
| <i>circWDR78</i> | miR-218-1-3p                        | 1 |
| <i>circWDR78</i> | miR-218-2-3p                        | 1 |
| <i>circWDR78</i> | miR-22-3p                           | 1 |
| <i>circWDR78</i> | miR-221-3p/222-3p                   | 2 |
| <i>circWDR78</i> | miR-221-5p/8073                     | 2 |
| <i>circWDR78</i> | miR-222-5p                          | 5 |
| <i>circWDR78</i> | miR-223-3p                          | 3 |
| <i>circWDR78</i> | miR-223-5p                          | 2 |
| <i>circWDR78</i> | miR-224-5p                          | 3 |
| <i>circWDR78</i> | miR-2276-3p                         | 2 |
| <i>circWDR78</i> | miR-2276-5p                         | 1 |
| <i>circWDR78</i> | miR-23-3p                           | 1 |
| <i>circWDR78</i> | miR-2355-5p                         | 1 |
| <i>circWDR78</i> | miR-24-3p                           | 1 |
| <i>circWDR78</i> | miR-25-3p/32-5p/92-3p/363-3p/367-3p | 2 |
| <i>circWDR78</i> | miR-26-3p                           | 1 |
| <i>circWDR78</i> | miR-26-5p                           | 5 |
| <i>circWDR78</i> | miR-2681-3p                         | 1 |
| <i>circWDR78</i> | miR-2681-5p                         | 2 |
| <i>circWDR78</i> | miR-2682-3p/6781-3p                 | 3 |
| <i>circWDR78</i> | miR-26b-3p                          | 1 |
| <i>circWDR78</i> | miR-27-3p                           | 4 |
| <i>circWDR78</i> | miR-27b-5p                          | 1 |

|                  |                                              |   |
|------------------|----------------------------------------------|---|
| <i>circWDR78</i> | miR-29-3p                                    | 3 |
| <i>circWDR78</i> | miR-2909                                     | 2 |
| <i>circWDR78</i> | miR-297                                      | 4 |
| <i>circWDR78</i> | miR-298                                      | 6 |
| <i>circWDR78</i> | miR-299-5p                                   | 1 |
| <i>circWDR78</i> | miR-29a-5p                                   | 4 |
| <i>circWDR78</i> | miR-29b-2-5p                                 | 4 |
| <i>circWDR78</i> | miR-30-3p                                    | 4 |
| <i>circWDR78</i> | miR-30-5p                                    | 3 |
| <i>circWDR78</i> | miR-301a-5p/301b-5p                          | 1 |
| <i>circWDR78</i> | miR-302-3p/372-3p/373-3p/520-3p              | 2 |
| <i>circWDR78</i> | miR-302b-5p/302d-5p                          | 2 |
| <i>circWDR78</i> | miR-302c-3p.2/520-3p                         | 1 |
| <i>circWDR78</i> | miR-302c-5p                                  | 2 |
| <i>circWDR78</i> | miR-3064-3p                                  | 3 |
| <i>circWDR78</i> | miR-3064-5p                                  | 3 |
| <i>circWDR78</i> | miR-3065-3p                                  | 1 |
| <i>circWDR78</i> | miR-3065-5p                                  | 1 |
| <i>circWDR78</i> | miR-3074-3p                                  | 2 |
| <i>circWDR78</i> | miR-3074-5p                                  | 3 |
| <i>circWDR78</i> | miR-30b-3p/1273h-5p/3689-3p/6779-5p/6780a-5p |   |
| <i>circWDR78</i> | miR-30c-3p/6788-5p                           | 1 |
| <i>circWDR78</i> | miR-31-3p                                    | 3 |
| <i>circWDR78</i> | miR-3117-5p                                  | 3 |
| <i>circWDR78</i> | miR-3120-3p                                  | 5 |
| <i>circWDR78</i> | miR-3120-5p                                  | 1 |
| <i>circWDR78</i> | miR-3121-5p                                  | 2 |
| <i>circWDR78</i> | miR-3123                                     | 5 |
| <i>circWDR78</i> | miR-3124-3p                                  | 1 |
| <i>circWDR78</i> | miR-3125/3916/6859-5p                        | 1 |
| <i>circWDR78</i> | miR-3128                                     | 1 |
| <i>circWDR78</i> | miR-3130-5p/4482-5p                          | 1 |
| <i>circWDR78</i> | miR-3133                                     | 9 |
| <i>circWDR78</i> | miR-3134                                     | 1 |
| <i>circWDR78</i> | miR-3136-5p/4439                             | 1 |
| <i>circWDR78</i> | miR-3137                                     | 6 |
| <i>circWDR78</i> | miR-3140-3p                                  | 2 |
| <i>circWDR78</i> | miR-3140-5p                                  | 7 |

|                  |                           |    |
|------------------|---------------------------|----|
| <i>circWDR78</i> | miR-3143                  | 2  |
| <i>circWDR78</i> | miR-3146                  | 3  |
| <i>circWDR78</i> | miR-3148                  | 1  |
| <i>circWDR78</i> | miR-3149                  | 8  |
| <i>circWDR78</i> | miR-3150a-5p/3150b-5p     | 2  |
| <i>circWDR78</i> | miR-3150b-3p              | 1  |
| <i>circWDR78</i> | miR-3151-3p               | 1  |
| <i>circWDR78</i> | miR-3152-3p               | 1  |
| <i>circWDR78</i> | miR-3152-5p               | 2  |
| <i>circWDR78</i> | miR-3153/6733-5p/6739-5p  | 2  |
| <i>circWDR78</i> | miR-3154                  | 6  |
| <i>circWDR78</i> | miR-3156-3p               | 1  |
| <i>circWDR78</i> | miR-3156-5p               | 3  |
| <i>circWDR78</i> | miR-3157-5p               | 6  |
| <i>circWDR78</i> | miR-3160-5p               | 2  |
| <i>circWDR78</i> | miR-3161                  | 4  |
| <i>circWDR78</i> | miR-3163                  | 6  |
| <i>circWDR78</i> | miR-3164                  | 2  |
| <i>circWDR78</i> | miR-3166                  | 2  |
| <i>circWDR78</i> | miR-3168                  | 1  |
| <i>circWDR78</i> | miR-3169                  | 1  |
| <i>circWDR78</i> | miR-3173-3p/6891-5p       | 1  |
| <i>circWDR78</i> | miR-3176/3922-3p          | 1  |
| <i>circWDR78</i> | miR-3177-5p               | 1  |
| <i>circWDR78</i> | miR-3182                  | 3  |
| <i>circWDR78</i> | miR-3183/4723-3p/6769b-3p | 4  |
| <i>circWDR78</i> | miR-3184-3p               | 3  |
| <i>circWDR78</i> | miR-3185                  | 11 |
| <i>circWDR78</i> | miR-3187-3p               | 2  |
| <i>circWDR78</i> | miR-3190-3p               | 1  |
| <i>circWDR78</i> | miR-3190-5p               | 1  |
| <i>circWDR78</i> | miR-3191-5p               | 2  |
| <i>circWDR78</i> | miR-3192-3p               | 1  |
| <i>circWDR78</i> | miR-3192-5p               | 9  |
| <i>circWDR78</i> | miR-3194-3p               | 1  |
| <i>circWDR78</i> | miR-3198/4309             | 1  |
| <i>circWDR78</i> | miR-3199/8052             | 1  |
| <i>circWDR78</i> | miR-3200-5p               | 3  |

|                  |                           |   |
|------------------|---------------------------|---|
| <i>circWDR78</i> | miR-3201/4791             | 2 |
| <i>circWDR78</i> | miR-320e                  | 2 |
| <i>circWDR78</i> | miR-323-3p                | 1 |
| <i>circWDR78</i> | miR-323b-3p               | 3 |
| <i>circWDR78</i> | miR-323b-5p/410-5p/494-5p | 1 |
| <i>circWDR78</i> | miR-325                   | 2 |
| <i>circWDR78</i> | miR-328-3p                | 1 |
| <i>circWDR78</i> | miR-33-5p                 | 1 |
| <i>circWDR78</i> | miR-330-3p                | 4 |
| <i>circWDR78</i> | miR-330-3p.2              | 9 |
| <i>circWDR78</i> | miR-335-5p                | 2 |
| <i>circWDR78</i> | miR-337-3p                | 6 |
| <i>circWDR78</i> | miR-338-5p                | 5 |
| <i>circWDR78</i> | miR-33a-3p                | 3 |
| <i>circWDR78</i> | miR-34-5p/449-5p          | 2 |
| <i>circWDR78</i> | miR-340-5p                | 6 |
| <i>circWDR78</i> | miR-342-3p                | 2 |
| <i>circWDR78</i> | miR-345-3p                | 7 |
| <i>circWDR78</i> | miR-34a-3p                | 4 |
| <i>circWDR78</i> | miR-34b-3p                | 4 |
| <i>circWDR78</i> | miR-34c-3p                | 4 |
| <i>circWDR78</i> | miR-3529-3p               | 4 |
| <i>circWDR78</i> | miR-3606-5p               | 1 |
| <i>circWDR78</i> | miR-361-3p                | 1 |
| <i>circWDR78</i> | miR-361-5p                | 8 |
| <i>circWDR78</i> | miR-3611                  | 2 |
| <i>circWDR78</i> | miR-3613-3p               | 5 |
| <i>circWDR78</i> | miR-3614-3p               | 3 |
| <i>circWDR78</i> | miR-3614-5p               | 4 |
| <i>circWDR78</i> | miR-3617-3p               | 4 |
| <i>circWDR78</i> | miR-3619-3p               | 3 |
| <i>circWDR78</i> | miR-3620-3p               | 1 |
| <i>circWDR78</i> | miR-3622a-3p/3622b-3p     | 4 |
| <i>circWDR78</i> | miR-3646                  | 1 |
| <i>circWDR78</i> | miR-365-3p                | 2 |
| <i>circWDR78</i> | miR-3651                  | 3 |
| <i>circWDR78</i> | miR-3652/4430             | 2 |
| <i>circWDR78</i> | miR-3653-3p               | 3 |

|                  |                                   |   |
|------------------|-----------------------------------|---|
| <i>circWDR78</i> | miR-3653-5p                       | 1 |
| <i>circWDR78</i> | miR-3654                          | 2 |
| <i>circWDR78</i> | miR-3657                          | 4 |
| <i>circWDR78</i> | miR-3658                          | 1 |
| <i>circWDR78</i> | miR-365a-5p/365b-5p               | 1 |
| <i>circWDR78</i> | miR-3660/4526                     | 1 |
| <i>circWDR78</i> | miR-3662                          | 3 |
| <i>circWDR78</i> | miR-3663-3p                       | 6 |
| <i>circWDR78</i> | miR-3664-3p                       | 1 |
| <i>circWDR78</i> | miR-3664-5p                       | 1 |
| <i>circWDR78</i> | miR-3665                          | 1 |
| <i>circWDR78</i> | miR-3667-5p                       | 4 |
| <i>circWDR78</i> | miR-367-5p                        | 2 |
| <i>circWDR78</i> | miR-3670                          | 1 |
| <i>circWDR78</i> | miR-3671                          | 2 |
| <i>circWDR78</i> | miR-3672/6864-3p                  | 1 |
| <i>circWDR78</i> | miR-3674                          | 3 |
| <i>circWDR78</i> | miR-3677-5p                       | 1 |
| <i>circWDR78</i> | miR-3678-3p                       | 3 |
| <i>circWDR78</i> | miR-3679-3p                       | 1 |
| <i>circWDR78</i> | miR-3680-3p                       | 2 |
| <i>circWDR78</i> | miR-3680-5p                       | 2 |
| <i>circWDR78</i> | miR-3681-5p                       | 1 |
| <i>circWDR78</i> | miR-3682-3p                       | 2 |
| <i>circWDR78</i> | miR-3682-5p                       | 3 |
| <i>circWDR78</i> | miR-3685                          | 6 |
| <i>circWDR78</i> | miR-3686                          | 4 |
| <i>circWDR78</i> | miR-3688-3p                       | 9 |
| <i>circWDR78</i> | miR-3688-5p                       | 1 |
| <i>circWDR78</i> | miR-3689a-5p/3689b-5p/3689e/3689f | 2 |
| <i>circWDR78</i> | miR-369-3p                        | 3 |
| <i>circWDR78</i> | miR-3690                          | 4 |
| <i>circWDR78</i> | miR-3691-3p                       | 4 |
| <i>circWDR78</i> | miR-3692-3p                       | 4 |
| <i>circWDR78</i> | miR-3692-5p                       | 6 |
| <i>circWDR78</i> | miR-371-5p                        | 1 |
| <i>circWDR78</i> | miR-3714                          | 2 |
| <i>circWDR78</i> | miR-371b-5p/373-5p/616-5p         | 1 |

|                  |                     |   |
|------------------|---------------------|---|
| <i>circWDR78</i> | miR-372-5p          | 1 |
| <i>circWDR78</i> | miR-374-5p          | 1 |
| <i>circWDR78</i> | miR-374-5p/655-3p   | 3 |
| <i>circWDR78</i> | miR-374a-3p         | 5 |
| <i>circWDR78</i> | miR-375             | 2 |
| <i>circWDR78</i> | miR-376-3p          | 1 |
| <i>circWDR78</i> | miR-376a-2-5p       | 1 |
| <i>circWDR78</i> | miR-376a-5p         | 1 |
| <i>circWDR78</i> | miR-376b-5p/376c-5p | 1 |
| <i>circWDR78</i> | miR-376c-3p         | 1 |
| <i>circWDR78</i> | miR-377-3p          | 1 |
| <i>circWDR78</i> | miR-378g            | 1 |
| <i>circWDR78</i> | miR-379-5p          | 2 |
| <i>circWDR78</i> | miR-380-5p/563      | 3 |
| <i>circWDR78</i> | miR-381-3p          | 5 |
| <i>circWDR78</i> | miR-381-5p          | 1 |
| <i>circWDR78</i> | miR-382-3p          | 1 |
| <i>circWDR78</i> | miR-383-3p          | 1 |
| <i>circWDR78</i> | miR-383-5p.1        | 6 |
| <i>circWDR78</i> | miR-383-5p.2        | 3 |
| <i>circWDR78</i> | miR-384             | 6 |
| <i>circWDR78</i> | miR-3908            | 3 |
| <i>circWDR78</i> | miR-3910            | 2 |
| <i>circWDR78</i> | miR-3912-5p         | 7 |
| <i>circWDR78</i> | miR-3913-3p         | 4 |
| <i>circWDR78</i> | miR-3914            | 3 |
| <i>circWDR78</i> | miR-3915            | 3 |
| <i>circWDR78</i> | miR-3919            | 4 |
| <i>circWDR78</i> | miR-3920            | 2 |
| <i>circWDR78</i> | miR-3921/4653-5p    | 1 |
| <i>circWDR78</i> | miR-3923            | 4 |
| <i>circWDR78</i> | miR-3925-3p         | 1 |
| <i>circWDR78</i> | miR-3925-5p         | 5 |
| <i>circWDR78</i> | miR-3926            | 1 |
| <i>circWDR78</i> | miR-3927-3p/6831-5p | 2 |
| <i>circWDR78</i> | miR-3927-5p         | 1 |
| <i>circWDR78</i> | miR-3928-3p         | 5 |
| <i>circWDR78</i> | miR-3928-5p/6806-3p | 3 |

|                  |                           |   |
|------------------|---------------------------|---|
| <i>circWDR78</i> | miR-3929/4419b/4478       | 3 |
| <i>circWDR78</i> | miR-3934-3p               | 3 |
| <i>circWDR78</i> | miR-3934-5p               | 1 |
| <i>circWDR78</i> | miR-3935                  | 1 |
| <i>circWDR78</i> | miR-3940-5p/4507          | 1 |
| <i>circWDR78</i> | miR-3942-3p               | 3 |
| <i>circWDR78</i> | miR-3942-5p               | 3 |
| <i>circWDR78</i> | miR-3944-5p               | 1 |
| <i>circWDR78</i> | miR-3973                  | 1 |
| <i>circWDR78</i> | miR-3974                  | 1 |
| <i>circWDR78</i> | miR-3976                  | 3 |
| <i>circWDR78</i> | miR-3977                  | 6 |
| <i>circWDR78</i> | miR-3978                  | 2 |
| <i>circWDR78</i> | miR-409-3p                | 4 |
| <i>circWDR78</i> | miR-410-3p                | 3 |
| <i>circWDR78</i> | miR-412-3p/6754-3p        | 1 |
| <i>circWDR78</i> | miR-421                   | 1 |
| <i>circWDR78</i> | miR-425-5p                | 1 |
| <i>circWDR78</i> | miR-4251                  | 4 |
| <i>circWDR78</i> | miR-4252                  | 2 |
| <i>circWDR78</i> | miR-4254                  | 4 |
| <i>circWDR78</i> | miR-4256                  | 2 |
| <i>circWDR78</i> | miR-4258                  | 1 |
| <i>circWDR78</i> | miR-4259                  | 1 |
| <i>circWDR78</i> | miR-4261                  | 2 |
| <i>circWDR78</i> | miR-4263                  | 3 |
| <i>circWDR78</i> | miR-4264                  | 1 |
| <i>circWDR78</i> | miR-4268                  | 1 |
| <i>circWDR78</i> | miR-4269/6715b-5p         | 2 |
| <i>circWDR78</i> | miR-4270/4441/6754-5p     | 3 |
| <i>circWDR78</i> | miR-4271/4725-3p/6780b-5p | 1 |
| <i>circWDR78</i> | miR-4273/7156-5p          | 3 |
| <i>circWDR78</i> | miR-4274                  | 2 |
| <i>circWDR78</i> | miR-4276                  | 3 |
| <i>circWDR78</i> | miR-4279                  | 4 |
| <i>circWDR78</i> | miR-4280                  | 2 |
| <i>circWDR78</i> | miR-4282                  | 3 |
| <i>circWDR78</i> | miR-4284                  | 1 |



|                  |                                              |   |
|------------------|----------------------------------------------|---|
| <i>circWDR78</i> | miR-4287/4685-3p                             | 1 |
| <i>circWDR78</i> | miR-4289                                     | 1 |
| <i>circWDR78</i> | miR-4291                                     | 3 |
| <i>circWDR78</i> | miR-4292/6791-5p                             | 1 |
| <i>circWDR78</i> | miR-4293                                     | 2 |
| <i>circWDR78</i> | miR-4299                                     | 3 |
| <i>circWDR78</i> | miR-4303                                     | 1 |
| <i>circWDR78</i> | miR-4304                                     | 1 |
| <i>circWDR78</i> | miR-4307                                     | 1 |
| <i>circWDR78</i> | miR-4308                                     | 1 |
| <i>circWDR78</i> | miR-431-5p                                   | 2 |
| <i>circWDR78</i> | miR-4311                                     | 1 |
| <i>circWDR78</i> | miR-4312                                     | 1 |
| <i>circWDR78</i> | miR-4313                                     | 1 |
| <i>circWDR78</i> | miR-4314                                     | 1 |
| <i>circWDR78</i> | miR-4315                                     | 1 |
| <i>circWDR78</i> | miR-4317                                     | 1 |
| <i>circWDR78</i> | miR-4318                                     | 6 |
| <i>circWDR78</i> | miR-432-5p                                   | 4 |
| <i>circWDR78</i> | miR-4324                                     | 3 |
| <i>circWDR78</i> | miR-4325                                     | 1 |
| <i>circWDR78</i> | miR-4328                                     | 6 |
| <i>circWDR78</i> | miR-4329                                     | 4 |
| <i>circWDR78</i> | miR-433-3p                                   | 1 |
| <i>circWDR78</i> | miR-4330                                     | 2 |
| <i>circWDR78</i> | miR-4422                                     | 9 |
| <i>circWDR78</i> | miR-4423-3p                                  | 2 |
| <i>circWDR78</i> | miR-4426/4647/4662b                          | 5 |
| <i>circWDR78</i> | miR-4428                                     | 1 |
| <i>circWDR78</i> | miR-4434/4516/5703                           | 1 |
| <i>circWDR78</i> | miR-4435                                     | 2 |
| <i>circWDR78</i> | miR-4436b-3p/4632-5p/6735-5p/6879-5p/7843-5p | 7 |
| <i>circWDR78</i> | miR-4436b-5p                                 | 7 |
| <i>circWDR78</i> | miR-4437                                     | 1 |
| <i>circWDR78</i> | miR-4438                                     | 4 |
| <i>circWDR78</i> | miR-4448                                     | 1 |
| <i>circWDR78</i> | miR-4451                                     | 2 |
| <i>circWDR78</i> | miR-4452                                     | 1 |

|                  |                    |   |
|------------------|--------------------|---|
| <i>circWDR78</i> | miR-4453/4538      | 1 |
| <i>circWDR78</i> | miR-4455           | 1 |
| <i>circWDR78</i> | miR-4456           | 3 |
| <i>circWDR78</i> | miR-4457           | 3 |
| <i>circWDR78</i> | miR-4463           | 2 |
| <i>circWDR78</i> | miR-4464/4748      | 1 |
| <i>circWDR78</i> | miR-4468           | 1 |
| <i>circWDR78</i> | miR-4469           | 1 |
| <i>circWDR78</i> | miR-4470           | 2 |
| <i>circWDR78</i> | miR-4474-5p        | 1 |
| <i>circWDR78</i> | miR-4476/6876-5p   | 5 |
| <i>circWDR78</i> | miR-4477a          | 4 |
| <i>circWDR78</i> | miR-4477b          | 1 |
| <i>circWDR78</i> | miR-448            | 2 |
| <i>circWDR78</i> | miR-4481/4745-5p   | 1 |
| <i>circWDR78</i> | miR-4482-3p        | 2 |
| <i>circWDR78</i> | miR-4484           | 2 |
| <i>circWDR78</i> | miR-4485-5p        | 1 |
| <i>circWDR78</i> | miR-4486           | 1 |
| <i>circWDR78</i> | miR-4490           | 3 |
| <i>circWDR78</i> | miR-4493           | 2 |
| <i>circWDR78</i> | miR-4494           | 3 |
| <i>circWDR78</i> | miR-4495           | 1 |
| <i>circWDR78</i> | miR-4496           | 3 |
| <i>circWDR78</i> | miR-4499           | 2 |
| <i>circWDR78</i> | miR-449b-3p        | 1 |
| <i>circWDR78</i> | miR-4501           | 3 |
| <i>circWDR78</i> | miR-4502           | 3 |
| <i>circWDR78</i> | miR-4503           | 1 |
| <i>circWDR78</i> | miR-4504           | 1 |
| <i>circWDR78</i> | miR-4505/5787      | 2 |
| <i>circWDR78</i> | miR-4509           | 3 |
| <i>circWDR78</i> | miR-450b-3p/769-3p | 6 |
| <i>circWDR78</i> | miR-450b-5p        | 2 |
| <i>circWDR78</i> | miR-451            | 3 |
| <i>circWDR78</i> | miR-4511           | 3 |
| <i>circWDR78</i> | miR-4514/4692      | 2 |
| <i>circWDR78</i> | miR-4517           | 3 |

|                  |                       |    |
|------------------|-----------------------|----|
| <i>circWDR78</i> | miR-4519              | 2  |
| <i>circWDR78</i> | miR-451b              | 3  |
| <i>circWDR78</i> | miR-452-3p            | 2  |
| <i>circWDR78</i> | miR-452-5p/892-3p     | 3  |
| <i>circWDR78</i> | miR-4520-2-3p         | 1  |
| <i>circWDR78</i> | miR-4520-3p           | 2  |
| <i>circWDR78</i> | miR-4524-5p           | 2  |
| <i>circWDR78</i> | miR-4524a-3p          | 3  |
| <i>circWDR78</i> | miR-4524b-3p          | 3  |
| <i>circWDR78</i> | miR-4527/6503-5p      | 1  |
| <i>circWDR78</i> | miR-4529-3p           | 1  |
| <i>circWDR78</i> | miR-4529-5p           | 1  |
| <i>circWDR78</i> | miR-4531              | 1  |
| <i>circWDR78</i> | miR-4534/8082         | 1  |
| <i>circWDR78</i> | miR-4536-3p           | 1  |
| <i>circWDR78</i> | miR-4539              | 5  |
| <i>circWDR78</i> | miR-455-3p.1          | 1  |
| <i>circWDR78</i> | miR-455-3p.2          | 1  |
| <i>circWDR78</i> | miR-455-5p            | 1  |
| <i>circWDR78</i> | miR-4635              | 2  |
| <i>circWDR78</i> | miR-4639-3p           | 1  |
| <i>circWDR78</i> | miR-4639-5p           | 1  |
| <i>circWDR78</i> | miR-4645-5p/4673      | 1  |
| <i>circWDR78</i> | miR-4649-3p           | 1  |
| <i>circWDR78</i> | miR-4650-3p           | 2  |
| <i>circWDR78</i> | miR-4650-5p           | 1  |
| <i>circWDR78</i> | miR-4652-3p           | 1  |
| <i>circWDR78</i> | miR-4659a-3p/4659b-3p | 23 |
| <i>circWDR78</i> | miR-4660              | 1  |
| <i>circWDR78</i> | miR-4661-3p           | 4  |
| <i>circWDR78</i> | miR-4662-5p           | 2  |
| <i>circWDR78</i> | miR-4662a-3p          | 4  |
| <i>circWDR78</i> | miR-4663              | 2  |
| <i>circWDR78</i> | miR-4666a-3p          | 5  |
| <i>circWDR78</i> | miR-4666a-5p          | 1  |
| <i>circWDR78</i> | miR-4667-3p           | 2  |
| <i>circWDR78</i> | miR-4668-3p           | 7  |
| <i>circWDR78</i> | miR-4668-5p           | 2  |

|                  |                     |    |
|------------------|---------------------|----|
| <i>circWDR78</i> | miR-4669            | 4  |
| <i>circWDR78</i> | miR-4670-3p         | 1  |
| <i>circWDR78</i> | miR-4674            | 1  |
| <i>circWDR78</i> | miR-4677-3p         | 3  |
| <i>circWDR78</i> | miR-4677-5p         | 3  |
| <i>circWDR78</i> | miR-4678            | 1  |
| <i>circWDR78</i> | miR-4679            | 3  |
| <i>circWDR78</i> | miR-4681            | 2  |
| <i>circWDR78</i> | miR-4682            | 1  |
| <i>circWDR78</i> | miR-4684-5p         | 1  |
| <i>circWDR78</i> | miR-4685-5p/6837-5p | 4  |
| <i>circWDR78</i> | miR-4687-3p         | 3  |
| <i>circWDR78</i> | miR-4687-5p         | 1  |
| <i>circWDR78</i> | miR-4689/6858-5p    | 3  |
| <i>circWDR78</i> | miR-4690-3p/5685    | 1  |
| <i>circWDR78</i> | miR-4691-3p         | 1  |
| <i>circWDR78</i> | miR-4691-5p/6792-3p | 10 |
| <i>circWDR78</i> | miR-4694-3p         | 3  |
| <i>circWDR78</i> | miR-4695-3p         | 1  |
| <i>circWDR78</i> | miR-4695-5p         | 2  |
| <i>circWDR78</i> | miR-4696            | 1  |
| <i>circWDR78</i> | miR-4697-3p         | 3  |
| <i>circWDR78</i> | miR-4698            | 1  |
| <i>circWDR78</i> | miR-4699-3p         | 1  |
| <i>circWDR78</i> | miR-4699-5p         | 5  |
| <i>circWDR78</i> | miR-4703-3p         | 1  |
| <i>circWDR78</i> | miR-4704-3p         | 3  |
| <i>circWDR78</i> | miR-4704-5p         | 1  |
| <i>circWDR78</i> | miR-4705            | 1  |
| <i>circWDR78</i> | miR-4709-3p         | 7  |
| <i>circWDR78</i> | miR-4709-5p         | 1  |
| <i>circWDR78</i> | miR-4712-3p         | 1  |
| <i>circWDR78</i> | miR-4713-5p         | 2  |
| <i>circWDR78</i> | miR-4714-3p         | 2  |
| <i>circWDR78</i> | miR-4714-5p         | 1  |
| <i>circWDR78</i> | miR-4715-3p         | 2  |
| <i>circWDR78</i> | miR-4715-5p         | 1  |
| <i>circWDR78</i> | miR-4717-3p         | 1  |

|                  |                             |   |
|------------------|-----------------------------|---|
| <i>circWDR78</i> | miR-4717-5p                 | 1 |
| <i>circWDR78</i> | miR-4719                    | 1 |
| <i>circWDR78</i> | miR-4720-5p/4799-3p/5588-5p | 1 |
| <i>circWDR78</i> | miR-4722-3p/6727-3p         | 1 |
| <i>circWDR78</i> | miR-4724-5p                 | 5 |
| <i>circWDR78</i> | miR-4728-3p                 | 2 |
| <i>circWDR78</i> | miR-4731-3p/4801            | 2 |
| <i>circWDR78</i> | miR-4731-5p                 | 2 |
| <i>circWDR78</i> | miR-4732-3p                 | 1 |
| <i>circWDR78</i> | miR-4732-5p                 | 1 |
| <i>circWDR78</i> | miR-4733-5p                 | 3 |
| <i>circWDR78</i> | miR-4735-5p                 | 1 |
| <i>circWDR78</i> | miR-4737                    | 1 |
| <i>circWDR78</i> | miR-4738-3p                 | 2 |
| <i>circWDR78</i> | miR-4738-5p                 | 1 |
| <i>circWDR78</i> | miR-4739                    | 3 |
| <i>circWDR78</i> | miR-4742-3p                 | 1 |
| <i>circWDR78</i> | miR-4742-5p                 | 2 |
| <i>circWDR78</i> | miR-4743-3p                 | 1 |
| <i>circWDR78</i> | miR-4744                    | 3 |
| <i>circWDR78</i> | miR-4750-3p                 | 1 |
| <i>circWDR78</i> | miR-4753-5p                 | 2 |
| <i>circWDR78</i> | miR-4755-3p                 | 4 |
| <i>circWDR78</i> | miR-4755-5p/5006-3p         | 1 |
| <i>circWDR78</i> | miR-4756-3p                 | 4 |
| <i>circWDR78</i> | miR-4757-5p/6744-3p         | 3 |
| <i>circWDR78</i> | miR-4759                    | 1 |
| <i>circWDR78</i> | miR-4760-5p/8061            | 1 |
| <i>circWDR78</i> | miR-4761-3p                 | 3 |
| <i>circWDR78</i> | miR-4761-5p                 | 1 |
| <i>circWDR78</i> | miR-4762-3p                 | 4 |
| <i>circWDR78</i> | miR-4762-5p                 | 8 |
| <i>circWDR78</i> | miR-4763-5p                 | 1 |
| <i>circWDR78</i> | miR-4766-3p                 | 1 |
| <i>circWDR78</i> | miR-4766-5p                 | 5 |
| <i>circWDR78</i> | miR-4768-5p/6833-3p         | 1 |
| <i>circWDR78</i> | miR-4771                    | 2 |
| <i>circWDR78</i> | miR-4772-3p                 | 2 |

|                  |              |    |
|------------------|--------------|----|
| <i>circWDR78</i> | miR-4772-5p  | 6  |
| <i>circWDR78</i> | miR-4773     | 1  |
| <i>circWDR78</i> | miR-4774-3p  | 2  |
| <i>circWDR78</i> | miR-4774-5p  | 3  |
| <i>circWDR78</i> | miR-4775     | 6  |
| <i>circWDR78</i> | miR-4776-3p  | 3  |
| <i>circWDR78</i> | miR-4777-5p  | 1  |
| <i>circWDR78</i> | miR-4778-3p  | 25 |
| <i>circWDR78</i> | miR-4778-5p  | 3  |
| <i>circWDR78</i> | miR-4779     | 2  |
| <i>circWDR78</i> | miR-4781-3p  | 4  |
| <i>circWDR78</i> | miR-4781-5p  | 1  |
| <i>circWDR78</i> | miR-4789-5p  | 2  |
| <i>circWDR78</i> | miR-4790-3p  | 3  |
| <i>circWDR78</i> | miR-4790-5p  | 1  |
| <i>circWDR78</i> | miR-4793-5p  | 2  |
| <i>circWDR78</i> | miR-4795-3p  | 3  |
| <i>circWDR78</i> | miR-4796-3p  | 1  |
| <i>circWDR78</i> | miR-4796-5p  | 3  |
| <i>circWDR78</i> | miR-4797-3p  | 1  |
| <i>circWDR78</i> | miR-4797-5p  | 3  |
| <i>circWDR78</i> | miR-4798-3p  | 2  |
| <i>circWDR78</i> | miR-4802-5p  | 2  |
| <i>circWDR78</i> | miR-4803     | 2  |
| <i>circWDR78</i> | miR-483-5p   | 1  |
| <i>circWDR78</i> | miR-484/3155 | 2  |
| <i>circWDR78</i> | miR-488-3p   | 6  |
| <i>circWDR78</i> | miR-488-5p   | 2  |
| <i>circWDR78</i> | miR-489-3p   | 7  |
| <i>circWDR78</i> | miR-490-3p   | 2  |
| <i>circWDR78</i> | miR-491-3p   | 2  |
| <i>circWDR78</i> | miR-493-3p   | 1  |
| <i>circWDR78</i> | miR-493-5p   | 1  |
| <i>circWDR78</i> | miR-494-3p   | 8  |
| <i>circWDR78</i> | miR-495-3p   | 4  |
| <i>circWDR78</i> | miR-496.2    | 2  |
| <i>circWDR78</i> | miR-497-3p   | 1  |
| <i>circWDR78</i> | miR-498      | 2  |

|                  |                             |   |
|------------------|-----------------------------|---|
| <i>circWDR78</i> | miR-4999-3p                 | 3 |
| <i>circWDR78</i> | miR-499a-3p/499b-3p         | 3 |
| <i>circWDR78</i> | miR-499b-5p                 | 3 |
| <i>circWDR78</i> | miR-5000-3p                 | 4 |
| <i>circWDR78</i> | miR-5002-5p                 | 1 |
| <i>circWDR78</i> | miR-5003-5p                 | 3 |
| <i>circWDR78</i> | miR-5004-3p                 | 4 |
| <i>circWDR78</i> | miR-5006-5p                 | 3 |
| <i>circWDR78</i> | miR-5007-5p                 | 1 |
| <i>circWDR78</i> | miR-5008-3p/6737-3p/7157-3p | 1 |
| <i>circWDR78</i> | miR-5009-3p                 | 3 |
| <i>circWDR78</i> | miR-500a-5p                 | 2 |
| <i>circWDR78</i> | miR-500b-3p                 | 1 |
| <i>circWDR78</i> | miR-5010-3p                 | 1 |
| <i>circWDR78</i> | miR-5011-5p                 | 2 |
| <i>circWDR78</i> | miR-503-5p                  | 2 |
| <i>circWDR78</i> | miR-504-3p                  | 1 |
| <i>circWDR78</i> | miR-504-5p.1                | 1 |
| <i>circWDR78</i> | miR-505-3p.2                | 1 |
| <i>circWDR78</i> | miR-505-5p                  | 1 |
| <i>circWDR78</i> | miR-507/557                 | 2 |
| <i>circWDR78</i> | miR-5087                    | 1 |
| <i>circWDR78</i> | miR-5089-3p                 | 2 |
| <i>circWDR78</i> | miR-5089-5p                 | 6 |
| <i>circWDR78</i> | miR-509-3-5p/509-5p/4418    | 2 |
| <i>circWDR78</i> | miR-5092                    | 3 |
| <i>circWDR78</i> | miR-5093                    | 1 |
| <i>circWDR78</i> | miR-5094                    | 3 |
| <i>circWDR78</i> | miR-5095/7151-3p            | 1 |
| <i>circWDR78</i> | miR-5096                    | 3 |
| <i>circWDR78</i> | miR-510-3p                  | 7 |
| <i>circWDR78</i> | miR-5100                    | 2 |
| <i>circWDR78</i> | miR-511-3p                  | 1 |
| <i>circWDR78</i> | miR-511-5p                  | 1 |
| <i>circWDR78</i> | miR-512-3p                  | 1 |
| <i>circWDR78</i> | miR-512-5p                  | 1 |
| <i>circWDR78</i> | miR-513a-3p/513c-3p/3606-3p | 2 |
| <i>circWDR78</i> | miR-513a-5p                 | 4 |

|                  |                                         |    |
|------------------|-----------------------------------------|----|
| <i>circWDR78</i> | miR-513b-3p                             | 4  |
| <i>circWDR78</i> | miR-513b-5p                             | 4  |
| <i>circWDR78</i> | miR-514a-3p                             | 7  |
| <i>circWDR78</i> | miR-514a-5p                             | 1  |
| <i>circWDR78</i> | miR-516a-3p/516b-3p/7162-5p             | 4  |
| <i>circWDR78</i> | miR-5186                                | 2  |
| <i>circWDR78</i> | miR-5189-3p                             | 1  |
| <i>circWDR78</i> | miR-518a-5p/527                         | 4  |
| <i>circWDR78</i> | miR-518d-5p/519-5p                      | 1  |
| <i>circWDR78</i> | miR-519-3p                              | 2  |
| <i>circWDR78</i> | miR-5190                                | 3  |
| <i>circWDR78</i> | miR-5192                                | 1  |
| <i>circWDR78</i> | miR-5193                                | 11 |
| <i>circWDR78</i> | miR-5196-3p                             | 2  |
| <i>circWDR78</i> | miR-5197-3p                             | 8  |
| <i>circWDR78</i> | miR-5197-5p                             | 5  |
| <i>circWDR78</i> | miR-520f-5p                             | 2  |
| <i>circWDR78</i> | miR-520g-3p                             | 1  |
| <i>circWDR78</i> | miR-520g-5p                             | 1  |
| <i>circWDR78</i> | miR-522-3p                              | 3  |
| <i>circWDR78</i> | miR-524-5p                              | 2  |
| <i>circWDR78</i> | miR-525-5p                              | 2  |
| <i>circWDR78</i> | miR-526b-5p                             | 4  |
| <i>circWDR78</i> | miR-532-3p                              | 3  |
| <i>circWDR78</i> | miR-532-5p                              | 1  |
| <i>circWDR78</i> | miR-539-5p                              | 6  |
| <i>circWDR78</i> | miR-542-3p                              | 1  |
| <i>circWDR78</i> | miR-543                                 | 1  |
| <i>circWDR78</i> | miR-544a                                | 3  |
| <i>circWDR78</i> | miR-544b                                | 3  |
| <i>circWDR78</i> | miR-545-3p                              | 1  |
| <i>circWDR78</i> | miR-545-5p                              | 4  |
| <i>circWDR78</i> | miR-548ac/548bb-3p/548d-3p/548h-3p/548z | 4  |
| <i>circWDR78</i> | miR-548ah-5p/3609                       | 2  |
| <i>circWDR78</i> | miR-548ai/548ag/548ba/570-5p            | 1  |
| <i>circWDR78</i> | miR-548aj-5p/548f-5p/548g-5p/548x-5p    | 6  |
| <i>circWDR78</i> | miR-548al/4445-3p                       | 1  |
| <i>circWDR78</i> | miR-548an                               | 2  |



|                  |                                                                    |    |
|------------------|--------------------------------------------------------------------|----|
| <i>circWDR78</i> | miR-548ao-3p                                                       | 4  |
| <i>circWDR78</i> | miR-548ao-5p/548ax                                                 | 1  |
| <i>circWDR78</i> | miR-548ap-3p/548aa/548t-3p                                         | 10 |
| <i>circWDR78</i> | miR-548aq-3p/548am-3p/548aj-3p/548ah-3p/548ae-3p/548j-3p/548x-3p   | 6  |
| <i>circWDR78</i> | miR-548as-3p                                                       | 10 |
| <i>circWDR78</i> | miR-548au-3p                                                       | 2  |
| <i>circWDR78</i> | miR-548av-3p                                                       | 7  |
| <i>circWDR78</i> | miR-548av-5p/548k/8054                                             | 2  |
| <i>circWDR78</i> | miR-548aw                                                          | 4  |
| <i>circWDR78</i> | miR-548ay-3p/548at-3p                                              | 10 |
| <i>circWDR78</i> | miR-548ay-5p/548au-5p/548as-5p/548ar-3p/548aq-5p/548ap-5p/548am-5p | 5  |
| <i>circWDR78</i> | miR-548az-3p/548ar-3p/548a-3p/548e-3p/548f-3p                      | 7  |
| <i>circWDR78</i> | miR-548az-5p/548t-5p                                               | 1  |
| <i>circWDR78</i> | miR-548b-3p                                                        | 3  |
| <i>circWDR78</i> | miR-548c-3p                                                        | 9  |
| <i>circWDR78</i> | miR-548g-3p                                                        | 5  |
| <i>circWDR78</i> | miR-548l                                                           | 2  |
| <i>circWDR78</i> | miR-548m                                                           | 2  |
| <i>circWDR78</i> | miR-548n                                                           | 1  |
| <i>circWDR78</i> | miR-548p                                                           | 7  |
| <i>circWDR78</i> | miR-548q                                                           | 3  |
| <i>circWDR78</i> | miR-548s                                                           | 2  |
| <i>circWDR78</i> | miR-548u/7161-5p                                                   | 3  |
| <i>circWDR78</i> | miR-548v                                                           | 2  |
| <i>circWDR78</i> | miR-549a                                                           | 2  |
| <i>circWDR78</i> | miR-550a-3-5p/550a-5p/1271-3p                                      | 1  |
| <i>circWDR78</i> | miR-550b-2-5p                                                      | 1  |
| <i>circWDR78</i> | miR-550b-3p                                                        | 3  |
| <i>circWDR78</i> | miR-551b-5p                                                        | 8  |
| <i>circWDR78</i> | miR-552-3p                                                         | 3  |
| <i>circWDR78</i> | miR-553                                                            | 2  |
| <i>circWDR78</i> | miR-5571-3p                                                        | 2  |
| <i>circWDR78</i> | miR-5571-5p                                                        | 4  |
| <i>circWDR78</i> | miR-5579-3p                                                        | 3  |
| <i>circWDR78</i> | miR-5579-5p                                                        | 2  |
| <i>circWDR78</i> | miR-5580-3p                                                        | 1  |
| <i>circWDR78</i> | miR-5580-5p                                                        | 2  |
| <i>circWDR78</i> | miR-5581-3p                                                        | 1  |

|                  |                 |   |
|------------------|-----------------|---|
| <i>circWDR78</i> | miR-5582-3p     | 7 |
| <i>circWDR78</i> | miR-5583-3p     | 3 |
| <i>circWDR78</i> | miR-5584-3p     | 1 |
| <i>circWDR78</i> | miR-5585-3p     | 2 |
| <i>circWDR78</i> | miR-5585-5p     | 1 |
| <i>circWDR78</i> | miR-5586-3p     | 1 |
| <i>circWDR78</i> | miR-5586-5p     | 2 |
| <i>circWDR78</i> | miR-5589-3p     | 1 |
| <i>circWDR78</i> | miR-5589-5p     | 2 |
| <i>circWDR78</i> | miR-561-5p      | 1 |
| <i>circWDR78</i> | miR-562         | 4 |
| <i>circWDR78</i> | miR-568         | 2 |
| <i>circWDR78</i> | miR-5680        | 2 |
| <i>circWDR78</i> | miR-5681a       | 6 |
| <i>circWDR78</i> | miR-5681b       | 2 |
| <i>circWDR78</i> | miR-5683        | 2 |
| <i>circWDR78</i> | miR-5687        | 1 |
| <i>circWDR78</i> | miR-5689        | 1 |
| <i>circWDR78</i> | miR-569         | 1 |
| <i>circWDR78</i> | miR-5691        | 1 |
| <i>circWDR78</i> | miR-5692a       | 2 |
| <i>circWDR78</i> | miR-5692bc      | 3 |
| <i>circWDR78</i> | miR-5693        | 1 |
| <i>circWDR78</i> | miR-5694        | 3 |
| <i>circWDR78</i> | miR-5697        | 7 |
| <i>circWDR78</i> | miR-570-3p      | 4 |
| <i>circWDR78</i> | miR-5700        | 1 |
| <i>circWDR78</i> | miR-5702        | 3 |
| <i>circWDR78</i> | miR-5704        | 1 |
| <i>circWDR78</i> | miR-573/3616-5p | 4 |
| <i>circWDR78</i> | miR-576-3p      | 3 |
| <i>circWDR78</i> | miR-576-5p      | 3 |
| <i>circWDR78</i> | miR-577         | 7 |
| <i>circWDR78</i> | miR-578         | 1 |
| <i>circWDR78</i> | miR-580-3p      | 3 |
| <i>circWDR78</i> | miR-580-5p      | 2 |
| <i>circWDR78</i> | miR-581         | 2 |
| <i>circWDR78</i> | miR-582-5p      | 3 |

|                  |                                      |   |
|------------------|--------------------------------------|---|
| <i>circWDR78</i> | miR-583                              | 1 |
| <i>circWDR78</i> | miR-584-5p                           | 2 |
| <i>circWDR78</i> | miR-586                              | 1 |
| <i>circWDR78</i> | miR-587                              | 1 |
| <i>circWDR78</i> | miR-588                              | 2 |
| <i>circWDR78</i> | miR-589-3p                           | 2 |
| <i>circWDR78</i> | miR-590-3p                           | 5 |
| <i>circWDR78</i> | miR-592                              | 1 |
| <i>circWDR78</i> | miR-593-3p                           | 2 |
| <i>circWDR78</i> | miR-595                              | 2 |
| <i>circWDR78</i> | miR-596                              | 2 |
| <i>circWDR78</i> | miR-597-3p                           | 2 |
| <i>circWDR78</i> | miR-597-5p                           | 1 |
| <i>circWDR78</i> | miR-598-3p                           | 2 |
| <i>circWDR78</i> | miR-599                              | 1 |
| <i>circWDR78</i> | miR-600                              | 1 |
| <i>circWDR78</i> | miR-605-3p                           | 2 |
| <i>circWDR78</i> | miR-605-5p                           | 7 |
| <i>circWDR78</i> | miR-606                              | 1 |
| <i>circWDR78</i> | miR-607                              | 1 |
| <i>circWDR78</i> | miR-6071                             | 5 |
| <i>circWDR78</i> | miR-6074                             | 1 |
| <i>circWDR78</i> | miR-6077                             | 7 |
| <i>circWDR78</i> | miR-6079                             | 4 |
| <i>circWDR78</i> | miR-6081                             | 5 |
| <i>circWDR78</i> | miR-6083                             | 6 |
| <i>circWDR78</i> | miR-6084                             | 2 |
| <i>circWDR78</i> | miR-609                              | 1 |
| <i>circWDR78</i> | miR-6090                             | 3 |
| <i>circWDR78</i> | miR-612/1285-3p/3187-5p/5189-5p/6860 | 1 |
| <i>circWDR78</i> | miR-6124                             | 1 |
| <i>circWDR78</i> | miR-6126                             | 2 |
| <i>circWDR78</i> | miR-6128                             | 4 |
| <i>circWDR78</i> | miR-6131                             | 1 |
| <i>circWDR78</i> | miR-618                              | 3 |
| <i>circWDR78</i> | miR-619-3p                           | 4 |
| <i>circWDR78</i> | miR-619-5p/6506-5p                   | 9 |
| <i>circWDR78</i> | miR-624-3p                           | 2 |

|                  |                 |    |
|------------------|-----------------|----|
| <i>circWDR78</i> | miR-624-5p      | 1  |
| <i>circWDR78</i> | miR-625-3p      | 3  |
| <i>circWDR78</i> | miR-626/6876-3p | 1  |
| <i>circWDR78</i> | miR-627-3p      | 4  |
| <i>circWDR78</i> | miR-627-5p      | 4  |
| <i>circWDR78</i> | miR-628-3p      | 2  |
| <i>circWDR78</i> | miR-629-3p      | 4  |
| <i>circWDR78</i> | miR-629-5p      | 1  |
| <i>circWDR78</i> | miR-631/3661    | 3  |
| <i>circWDR78</i> | miR-633         | 1  |
| <i>circWDR78</i> | miR-636         | 3  |
| <i>circWDR78</i> | miR-640         | 1  |
| <i>circWDR78</i> | miR-641/3617-5p | 3  |
| <i>circWDR78</i> | miR-642a-5p     | 1  |
| <i>circWDR78</i> | miR-642b-5p     | 1  |
| <i>circWDR78</i> | miR-643         | 4  |
| <i>circWDR78</i> | miR-646         | 2  |
| <i>circWDR78</i> | miR-647         | 3  |
| <i>circWDR78</i> | miR-649         | 2  |
| <i>circWDR78</i> | miR-6499-3p     | 1  |
| <i>circWDR78</i> | miR-6500-3p     | 4  |
| <i>circWDR78</i> | miR-6502-3p     | 1  |
| <i>circWDR78</i> | miR-6504-3p     | 3  |
| <i>circWDR78</i> | miR-6505-5p     | 2  |
| <i>circWDR78</i> | miR-6507-3p     | 2  |
| <i>circWDR78</i> | miR-6507-5p     | 10 |
| <i>circWDR78</i> | miR-6509-3p     | 7  |
| <i>circWDR78</i> | miR-651-3p      | 4  |
| <i>circWDR78</i> | miR-651-5p      | 2  |
| <i>circWDR78</i> | miR-6511-5p     | 1  |
| <i>circWDR78</i> | miR-6512-5p     | 1  |
| <i>circWDR78</i> | miR-6513-3p     | 5  |
| <i>circWDR78</i> | miR-6514-3p     | 8  |
| <i>circWDR78</i> | miR-6514-5p     | 2  |
| <i>circWDR78</i> | miR-6515-3p     | 17 |
| <i>circWDR78</i> | miR-6516-3p     | 1  |
| <i>circWDR78</i> | miR-6516-5p     | 2  |
| <i>circWDR78</i> | miR-652-3p      | 1  |

|                  |                     |    |
|------------------|---------------------|----|
| <i>circWDR78</i> | miR-652-5p          | 2  |
| <i>circWDR78</i> | miR-653-3p          | 4  |
| <i>circWDR78</i> | miR-653-5p          | 1  |
| <i>circWDR78</i> | miR-656-3p          | 4  |
| <i>circWDR78</i> | miR-657             | 1  |
| <i>circWDR78</i> | miR-659-3p          | 3  |
| <i>circWDR78</i> | miR-660-3p          | 11 |
| <i>circWDR78</i> | miR-661             | 7  |
| <i>circWDR78</i> | miR-663b            | 1  |
| <i>circWDR78</i> | miR-664a-3p         | 2  |
| <i>circWDR78</i> | miR-664a-5p/4794    | 2  |
| <i>circWDR78</i> | miR-670-3p          | 19 |
| <i>circWDR78</i> | miR-670-5p          | 1  |
| <i>circWDR78</i> | miR-671-5p          | 2  |
| <i>circWDR78</i> | miR-6715a-3p        | 1  |
| <i>circWDR78</i> | miR-6715b-3p        | 1  |
| <i>circWDR78</i> | miR-6716-5p         | 3  |
| <i>circWDR78</i> | miR-6719-3p         | 1  |
| <i>circWDR78</i> | miR-6720-5p         | 1  |
| <i>circWDR78</i> | miR-6721-5p         | 3  |
| <i>circWDR78</i> | miR-6728-3p         | 2  |
| <i>circWDR78</i> | miR-6728-5p         | 6  |
| <i>circWDR78</i> | miR-6730-3p         | 1  |
| <i>circWDR78</i> | miR-6730-5p         | 6  |
| <i>circWDR78</i> | miR-6731-3p         | 1  |
| <i>circWDR78</i> | miR-6731-5p/8085    | 1  |
| <i>circWDR78</i> | miR-6732-3p         | 2  |
| <i>circWDR78</i> | miR-6735-3p         | 1  |
| <i>circWDR78</i> | miR-6736-3p         | 1  |
| <i>circWDR78</i> | miR-6738-3p         | 3  |
| <i>circWDR78</i> | miR-6741-5p         | 1  |
| <i>circWDR78</i> | miR-6742-3p         | 8  |
| <i>circWDR78</i> | miR-6744-5p         | 2  |
| <i>circWDR78</i> | miR-6747-3p         | 1  |
| <i>circWDR78</i> | miR-6749-3p         | 10 |
| <i>circWDR78</i> | miR-675-3p          | 4  |
| <i>circWDR78</i> | miR-6750-3p         | 1  |
| <i>circWDR78</i> | miR-6753-3p/7107-3p | 1  |

|                  |                     |    |
|------------------|---------------------|----|
| <i>circWDR78</i> | miR-6753-5p         | 1  |
| <i>circWDR78</i> | miR-6755-3p         | 1  |
| <i>circWDR78</i> | miR-6757-3p         | 4  |
| <i>circWDR78</i> | miR-6758-5p/6856-5p | 1  |
| <i>circWDR78</i> | miR-6759-3p         | 2  |
| <i>circWDR78</i> | miR-676-3p          | 1  |
| <i>circWDR78</i> | miR-6760-3p         | 6  |
| <i>circWDR78</i> | miR-6760-5p         | 3  |
| <i>circWDR78</i> | miR-6761-5p         | 4  |
| <i>circWDR78</i> | miR-6763-3p         | 2  |
| <i>circWDR78</i> | miR-6765-3p         | 4  |
| <i>circWDR78</i> | miR-6768-3p         | 2  |
| <i>circWDR78</i> | miR-6768-5p         | 3  |
| <i>circWDR78</i> | miR-6770-5p         | 2  |
| <i>circWDR78</i> | miR-6772-5p         | 1  |
| <i>circWDR78</i> | miR-6773-3p         | 3  |
| <i>circWDR78</i> | miR-6776-3p         | 1  |
| <i>circWDR78</i> | miR-6776-5p         | 2  |
| <i>circWDR78</i> | miR-6777-3p         | 1  |
| <i>circWDR78</i> | miR-6778-3p         | 3  |
| <i>circWDR78</i> | miR-6779-3p         | 1  |
| <i>circWDR78</i> | miR-6780a-3p        | 21 |
| <i>circWDR78</i> | miR-6782-3p         | 1  |
| <i>circWDR78</i> | miR-6783-5p         | 1  |
| <i>circWDR78</i> | miR-6787-3p         | 5  |
| <i>circWDR78</i> | miR-6790-3p         | 3  |
| <i>circWDR78</i> | miR-6791-3p/6829-3p | 3  |
| <i>circWDR78</i> | miR-6794-3p         | 2  |
| <i>circWDR78</i> | miR-6795-3p         | 2  |
| <i>circWDR78</i> | miR-6798-5p         | 1  |
| <i>circWDR78</i> | miR-6800-3p         | 4  |
| <i>circWDR78</i> | miR-6801-5p         | 1  |
| <i>circWDR78</i> | miR-6802-3p         | 1  |
| <i>circWDR78</i> | miR-6804-3p         | 1  |
| <i>circWDR78</i> | miR-6807-5p         | 1  |
| <i>circWDR78</i> | miR-6808-3p         | 1  |
| <i>circWDR78</i> | miR-6809-3p         | 1  |
| <i>circWDR78</i> | miR-6814-5p         | 1  |

|                  |                     |    |
|------------------|---------------------|----|
| <i>circWDR78</i> | miR-6817-3p         | 1  |
| <i>circWDR78</i> | miR-6819-3p/6877-3p | 3  |
| <i>circWDR78</i> | miR-6821-3p         | 3  |
| <i>circWDR78</i> | miR-6826-5p         | 3  |
| <i>circWDR78</i> | miR-6827-5p         | 1  |
| <i>circWDR78</i> | miR-6828-3p         | 5  |
| <i>circWDR78</i> | miR-6828-5p         | 2  |
| <i>circWDR78</i> | miR-6830-3p         | 2  |
| <i>circWDR78</i> | miR-6830-5p         | 2  |
| <i>circWDR78</i> | miR-6832-5p         | 1  |
| <i>circWDR78</i> | miR-6834-3p         | 5  |
| <i>circWDR78</i> | miR-6836-3p         | 1  |
| <i>circWDR78</i> | miR-6837-3p         | 1  |
| <i>circWDR78</i> | miR-6838-3p         | 2  |
| <i>circWDR78</i> | miR-6839-3p         | 1  |
| <i>circWDR78</i> | miR-6841-3p         | 1  |
| <i>circWDR78</i> | miR-6842-3p         | 3  |
| <i>circWDR78</i> | miR-6843-3p/6848-3p | 4  |
| <i>circWDR78</i> | miR-6844            | 1  |
| <i>circWDR78</i> | miR-6845-3p         | 2  |
| <i>circWDR78</i> | miR-6852-5p         | 8  |
| <i>circWDR78</i> | miR-6854-5p         | 3  |
| <i>circWDR78</i> | miR-6861-5p         | 2  |
| <i>circWDR78</i> | miR-6863            | 1  |
| <i>circWDR78</i> | miR-6864-5p         | 2  |
| <i>circWDR78</i> | miR-6866-5p         | 1  |
| <i>circWDR78</i> | miR-6867-3p         | 2  |
| <i>circWDR78</i> | miR-6868-3p         | 4  |
| <i>circWDR78</i> | miR-6868-5p         | 1  |
| <i>circWDR78</i> | miR-6871-3p         | 3  |
| <i>circWDR78</i> | miR-6872-3p         | 1  |
| <i>circWDR78</i> | miR-6873-3p         | 1  |
| <i>circWDR78</i> | miR-6874-5p         | 2  |
| <i>circWDR78</i> | miR-6875-3p         | 23 |
| <i>circWDR78</i> | miR-6878-3p         | 1  |
| <i>circWDR78</i> | miR-6878-5p         | 1  |
| <i>circWDR78</i> | miR-6879-3p         | 1  |
| <i>circWDR78</i> | miR-6881-3p         | 21 |

|                  |             |    |
|------------------|-------------|----|
| <i>circWDR78</i> | miR-6882-5p | 1  |
| <i>circWDR78</i> | miR-6885-3p | 5  |
| <i>circWDR78</i> | miR-6887-3p | 2  |
| <i>circWDR78</i> | miR-6888-3p | 3  |
| <i>circWDR78</i> | miR-6889-3p | 1  |
| <i>circWDR78</i> | miR-6890-3p | 6  |
| <i>circWDR78</i> | miR-6892-3p | 1  |
| <i>circWDR78</i> | miR-6892-5p | 1  |
| <i>circWDR78</i> | miR-6894-3p | 8  |
| <i>circWDR78</i> | miR-6894-5p | 2  |
| <i>circWDR78</i> | miR-6895-3p | 2  |
| <i>circWDR78</i> | miR-7-3p    | 2  |
| <i>circWDR78</i> | miR-7-5p    | 7  |
| <i>circWDR78</i> | miR-708-3p  | 2  |
| <i>circWDR78</i> | miR-7108-3p | 1  |
| <i>circWDR78</i> | miR-7110-3p | 1  |
| <i>circWDR78</i> | miR-7111-3p | 21 |
| <i>circWDR78</i> | miR-7113-3p | 1  |
| <i>circWDR78</i> | miR-7113-5p | 4  |
| <i>circWDR78</i> | miR-7114-5p | 4  |
| <i>circWDR78</i> | miR-7151-5p | 2  |
| <i>circWDR78</i> | miR-7152-5p | 3  |
| <i>circWDR78</i> | miR-7153-3p | 1  |
| <i>circWDR78</i> | miR-7154-3p | 2  |
| <i>circWDR78</i> | miR-7154-5p | 1  |
| <i>circWDR78</i> | miR-7156-3p | 1  |
| <i>circWDR78</i> | miR-7158-3p | 4  |
| <i>circWDR78</i> | miR-7159-3p | 2  |
| <i>circWDR78</i> | miR-7159-5p | 1  |
| <i>circWDR78</i> | miR-7160-5p | 2  |
| <i>circWDR78</i> | miR-7162-3p | 1  |
| <i>circWDR78</i> | miR-744-3p  | 2  |
| <i>circWDR78</i> | miR-758-3p  | 1  |
| <i>circWDR78</i> | miR-758-5p  | 3  |
| <i>circWDR78</i> | miR-759     | 1  |
| <i>circWDR78</i> | miR-765     | 2  |
| <i>circWDR78</i> | miR-766-3p  | 1  |
| <i>circWDR78</i> | miR-766-5p  | 2  |



|                  |             |   |
|------------------|-------------|---|
| <i>circWDR78</i> | miR-767-3p  | 1 |
| <i>circWDR78</i> | miR-767-5p  | 2 |
| <i>circWDR78</i> | miR-770-5p  | 2 |
| <i>circWDR78</i> | miR-7702    | 1 |
| <i>circWDR78</i> | miR-7703    | 1 |
| <i>circWDR78</i> | miR-7705    | 1 |
| <i>circWDR78</i> | miR-7844-5p | 2 |
| <i>circWDR78</i> | miR-7851-3p | 4 |
| <i>circWDR78</i> | miR-7856-5p | 2 |
| <i>circWDR78</i> | miR-7974    | 3 |
| <i>circWDR78</i> | miR-7975    | 2 |
| <i>circWDR78</i> | miR-7978    | 3 |
| <i>circWDR78</i> | miR-802     | 4 |
| <i>circWDR78</i> | miR-8055    | 2 |
| <i>circWDR78</i> | miR-8057    | 2 |
| <i>circWDR78</i> | miR-8060    | 2 |
| <i>circWDR78</i> | miR-8063    | 1 |
| <i>circWDR78</i> | miR-8066    | 5 |
| <i>circWDR78</i> | miR-8070    | 3 |
| <i>circWDR78</i> | miR-8075    | 1 |
| <i>circWDR78</i> | miR-8076    | 1 |
| <i>circWDR78</i> | miR-8077    | 2 |
| <i>circWDR78</i> | miR-8081    | 4 |
| <i>circWDR78</i> | miR-8083    | 1 |
| <i>circWDR78</i> | miR-8084    | 3 |
| <i>circWDR78</i> | miR-874-5p  | 1 |
| <i>circWDR78</i> | miR-875-3p  | 1 |
| <i>circWDR78</i> | miR-876-5p  | 4 |
| <i>circWDR78</i> | miR-877-5p  | 1 |
| <i>circWDR78</i> | miR-885-3p  | 1 |
| <i>circWDR78</i> | miR-885-5p  | 1 |
| <i>circWDR78</i> | miR-888-5p  | 1 |
| <i>circWDR78</i> | miR-889-3p  | 3 |
| <i>circWDR78</i> | miR-889-5p  | 3 |
| <i>circWDR78</i> | miR-890     | 5 |
| <i>circWDR78</i> | miR-891a-3p | 1 |
| <i>circWDR78</i> | miR-891b    | 2 |
| <i>circWDR78</i> | miR-892a    | 6 |

|                   |                              |   |
|-------------------|------------------------------|---|
| <i>circWDR78</i>  | miR-9-3p                     | 4 |
| <i>circWDR78</i>  | miR-9-5p                     | 1 |
| <i>circWDR78</i>  | miR-920/4300/5591-5p/6726-5p | 3 |
| <i>circWDR78</i>  | miR-921                      | 1 |
| <i>circWDR78</i>  | miR-922                      | 1 |
| <i>circWDR78</i>  | miR-924                      | 2 |
| <i>circWDR78</i>  | miR-92a-1-5p                 | 1 |
| <i>circWDR78</i>  | miR-93-3p                    | 6 |
| <i>circWDR78</i>  | miR-936                      | 1 |
| <i>circWDR78</i>  | miR-937-5p                   | 4 |
| <i>circWDR78</i>  | miR-939-3p                   | 8 |
| <i>circWDR78</i>  | miR-942-5p                   | 1 |
| <i>circWDR78</i>  | miR-943                      | 1 |
| <i>circWDR78</i>  | miR-944                      | 5 |
| <i>circWDR78</i>  | miR-95-5p                    | 4 |
| <i>circWDR78</i>  | miR-96-3p                    | 1 |
| <i>circYY1AP1</i> | let-7-5p/98-5p               | 1 |
| <i>circYY1AP1</i> | miR-10-5p                    | 1 |
| <i>circYY1AP1</i> | miR-100-3p                   | 4 |
| <i>circYY1AP1</i> | miR-101-3p.1                 | 1 |
| <i>circYY1AP1</i> | miR-103-3p/107               | 2 |
| <i>circYY1AP1</i> | miR-103a-2-5p                | 1 |
| <i>circYY1AP1</i> | miR-1180-5p                  | 1 |
| <i>circYY1AP1</i> | miR-1199-5p/6751-3p          | 2 |
| <i>circYY1AP1</i> | miR-1203                     | 3 |
| <i>circYY1AP1</i> | miR-1206                     | 1 |
| <i>circYY1AP1</i> | miR-1207-3p                  | 2 |
| <i>circYY1AP1</i> | miR-1224-5p                  | 1 |
| <i>circYY1AP1</i> | miR-1225-3p                  | 2 |
| <i>circYY1AP1</i> | miR-1226-3p                  | 3 |
| <i>circYY1AP1</i> | miR-1227-5p                  | 1 |
| <i>circYY1AP1</i> | miR-1231                     | 1 |
| <i>circYY1AP1</i> | miR-1237-3p                  | 2 |
| <i>circYY1AP1</i> | miR-1245b-3p                 | 1 |
| <i>circYY1AP1</i> | miR-1248                     | 2 |
| <i>circYY1AP1</i> | miR-125-5p                   | 1 |
| <i>circYY1AP1</i> | miR-1252-3p                  | 1 |
| <i>circYY1AP1</i> | miR-1252-5p                  | 2 |

|                   |                                      |   |
|-------------------|--------------------------------------|---|
| <i>circYY1AP1</i> | miR-1253                             | 1 |
| <i>circYY1AP1</i> | miR-1258                             | 1 |
| <i>circYY1AP1</i> | miR-1264                             | 1 |
| <i>circYY1AP1</i> | miR-1265                             | 1 |
| <i>circYY1AP1</i> | miR-1272                             | 1 |
| <i>circYY1AP1</i> | miR-1273f                            | 1 |
| <i>circYY1AP1</i> | miR-1273h-3p                         | 1 |
| <i>circYY1AP1</i> | miR-1285-5p                          | 3 |
| <i>circYY1AP1</i> | miR-1295a                            | 1 |
| <i>circYY1AP1</i> | miR-1295b-5p/1912                    | 1 |
| <i>circYY1AP1</i> | miR-1299                             | 1 |
| <i>circYY1AP1</i> | miR-130-3p/301-3p/454-3p             | 1 |
| <i>circYY1AP1</i> | miR-1301-3p                          | 2 |
| <i>circYY1AP1</i> | miR-1301-5p/6502-5p                  | 1 |
| <i>circYY1AP1</i> | miR-1304-5p                          | 1 |
| <i>circYY1AP1</i> | miR-1306-5p                          | 4 |
| <i>circYY1AP1</i> | miR-132-3p/212-3p                    | 1 |
| <i>circYY1AP1</i> | miR-1322                             | 1 |
| <i>circYY1AP1</i> | miR-135b-3p                          | 1 |
| <i>circYY1AP1</i> | miR-138-2-3p                         | 1 |
| <i>circYY1AP1</i> | miR-141-5p                           | 1 |
| <i>circYY1AP1</i> | miR-143-3p                           | 1 |
| <i>circYY1AP1</i> | miR-144-3p                           | 1 |
| <i>circYY1AP1</i> | miR-148-3p/152-3p                    | 1 |
| <i>circYY1AP1</i> | miR-148a-5p                          | 1 |
| <i>circYY1AP1</i> | miR-15-5p/16-5p/195-5p/424-5p/497-5p | 1 |
| <i>circYY1AP1</i> | miR-1537-5p                          | 2 |
| <i>circYY1AP1</i> | miR-154-5p                           | 1 |
| <i>circYY1AP1</i> | miR-1825                             | 1 |
| <i>circYY1AP1</i> | miR-190-5p                           | 3 |
| <i>circYY1AP1</i> | miR-193-3p                           | 1 |
| <i>circYY1AP1</i> | miR-196-5p                           | 1 |
| <i>circYY1AP1</i> | miR-199-3p                           | 4 |
| <i>circYY1AP1</i> | miR-199-5p                           | 1 |
| <i>circYY1AP1</i> | miR-202-3p                           | 1 |
| <i>circYY1AP1</i> | miR-205-5p                           | 1 |
| <i>circYY1AP1</i> | miR-20b-3p                           | 1 |
| <i>circYY1AP1</i> | miR-21-3p/3591-3p                    | 2 |

|                   |                       |   |
|-------------------|-----------------------|---|
| <i>circYY1AP1</i> | miR-2114-3p           | 2 |
| <i>circYY1AP1</i> | miR-2115-3p           | 2 |
| <i>circYY1AP1</i> | miR-214-3p/3619-5p    | 4 |
| <i>circYY1AP1</i> | miR-215-3p            | 1 |
| <i>circYY1AP1</i> | miR-216a-5p           | 3 |
| <i>circYY1AP1</i> | miR-216b-5p           | 3 |
| <i>circYY1AP1</i> | miR-2276-3p           | 2 |
| <i>circYY1AP1</i> | miR-2467-3p           | 1 |
| <i>circYY1AP1</i> | miR-26-5p             | 1 |
| <i>circYY1AP1</i> | miR-28-5p/708-5p      | 2 |
| <i>circYY1AP1</i> | miR-29-3p             | 3 |
| <i>circYY1AP1</i> | miR-298               | 1 |
| <i>circYY1AP1</i> | miR-302b-5p/302d-5p   | 2 |
| <i>circYY1AP1</i> | miR-302c-5p           | 2 |
| <i>circYY1AP1</i> | miR-3064-3p           | 2 |
| <i>circYY1AP1</i> | miR-3065-3p           | 1 |
| <i>circYY1AP1</i> | miR-3115              | 1 |
| <i>circYY1AP1</i> | miR-3120-3p           | 1 |
| <i>circYY1AP1</i> | miR-3122/3913-5p      | 1 |
| <i>circYY1AP1</i> | miR-3123              | 1 |
| <i>circYY1AP1</i> | miR-3125/3916/6859-5p | 1 |
| <i>circYY1AP1</i> | miR-3128              | 1 |
| <i>circYY1AP1</i> | miR-3130-5p/4482-5p   | 1 |
| <i>circYY1AP1</i> | miR-3136-3p/7155-3p   | 1 |
| <i>circYY1AP1</i> | miR-3137              | 1 |
| <i>circYY1AP1</i> | miR-3145-5p           | 1 |
| <i>circYY1AP1</i> | miR-3150b-3p          | 4 |
| <i>circYY1AP1</i> | miR-3154              | 2 |
| <i>circYY1AP1</i> | miR-3157-5p           | 1 |
| <i>circYY1AP1</i> | miR-3171              | 1 |
| <i>circYY1AP1</i> | miR-3173-3p/6891-5p   | 1 |
| <i>circYY1AP1</i> | miR-3176/3922-3p      | 1 |
| <i>circYY1AP1</i> | miR-3179              | 1 |
| <i>circYY1AP1</i> | miR-3182              | 1 |
| <i>circYY1AP1</i> | miR-3184-3p           | 1 |
| <i>circYY1AP1</i> | miR-3185              | 1 |
| <i>circYY1AP1</i> | miR-3187-3p           | 1 |
| <i>circYY1AP1</i> | miR-3190-5p           | 1 |

|                   |                       |   |
|-------------------|-----------------------|---|
| <i>circYY1AP1</i> | miR-3201/4791         | 3 |
| <i>circYY1AP1</i> | miR-3202              | 1 |
| <i>circYY1AP1</i> | miR-320e              | 1 |
| <i>circYY1AP1</i> | miR-324-5p            | 1 |
| <i>circYY1AP1</i> | miR-328-3p            | 1 |
| <i>circYY1AP1</i> | miR-338-3p            | 2 |
| <i>circYY1AP1</i> | miR-34-5p/449-5p      | 1 |
| <i>circYY1AP1</i> | miR-3529-3p           | 1 |
| <i>circYY1AP1</i> | miR-3612              | 3 |
| <i>circYY1AP1</i> | miR-3622a-3p/3622b-3p | 2 |
| <i>circYY1AP1</i> | miR-3622b-5p          | 1 |
| <i>circYY1AP1</i> | miR-3646              | 1 |
| <i>circYY1AP1</i> | miR-3675-5p           | 1 |
| <i>circYY1AP1</i> | miR-3678-3p           | 1 |
| <i>circYY1AP1</i> | miR-3682-3p           | 1 |
| <i>circYY1AP1</i> | miR-3688-3p           | 1 |
| <i>circYY1AP1</i> | miR-3689d/6851-5p     | 1 |
| <i>circYY1AP1</i> | miR-3692-3p           | 1 |
| <i>circYY1AP1</i> | miR-378-3p            | 1 |
| <i>circYY1AP1</i> | miR-379-5p            | 1 |
| <i>circYY1AP1</i> | miR-383-3p            | 1 |
| <i>circYY1AP1</i> | miR-3911              | 2 |
| <i>circYY1AP1</i> | miR-3914              | 2 |
| <i>circYY1AP1</i> | miR-3915              | 1 |
| <i>circYY1AP1</i> | miR-3920              | 1 |
| <i>circYY1AP1</i> | miR-3925-3p           | 2 |
| <i>circYY1AP1</i> | miR-3925-5p           | 1 |
| <i>circYY1AP1</i> | miR-3926              | 2 |
| <i>circYY1AP1</i> | miR-3927-3p/6831-5p   | 1 |
| <i>circYY1AP1</i> | miR-3928-3p           | 1 |
| <i>circYY1AP1</i> | miR-3944-5p           | 1 |
| <i>circYY1AP1</i> | miR-425-5p            | 1 |
| <i>circYY1AP1</i> | miR-4267              | 1 |
| <i>circYY1AP1</i> | miR-4274              | 1 |
| <i>circYY1AP1</i> | miR-4277              | 1 |
| <i>circYY1AP1</i> | miR-4279              | 1 |
| <i>circYY1AP1</i> | miR-4280              | 1 |
| <i>circYY1AP1</i> | miR-4302              | 1 |

|                   |                     |   |
|-------------------|---------------------|---|
| <i>circYY1AP1</i> | miR-4304            | 1 |
| <i>circYY1AP1</i> | miR-4320            | 1 |
| <i>circYY1AP1</i> | miR-4421/5699-3p    | 1 |
| <i>circYY1AP1</i> | miR-4424            | 1 |
| <i>circYY1AP1</i> | miR-4426/4647/4662b | 3 |
| <i>circYY1AP1</i> | miR-4428            | 1 |
| <i>circYY1AP1</i> | miR-4433a-3p        | 1 |
| <i>circYY1AP1</i> | miR-4433b-3p        | 1 |
| <i>circYY1AP1</i> | miR-4434/4516/5703  | 1 |
| <i>circYY1AP1</i> | miR-4435            | 1 |
| <i>circYY1AP1</i> | miR-4436b-5p        | 1 |
| <i>circYY1AP1</i> | miR-4451            | 1 |
| <i>circYY1AP1</i> | miR-4459            | 1 |
| <i>circYY1AP1</i> | miR-4474-3p         | 2 |
| <i>circYY1AP1</i> | miR-4475            | 1 |
| <i>circYY1AP1</i> | miR-4476/6876-5p    | 2 |
| <i>circYY1AP1</i> | miR-4480            | 1 |
| <i>circYY1AP1</i> | miR-4495            | 1 |
| <i>circYY1AP1</i> | miR-4502            | 1 |
| <i>circYY1AP1</i> | miR-450a-1-3p       | 1 |
| <i>circYY1AP1</i> | miR-450b-3p/769-3p  | 1 |
| <i>circYY1AP1</i> | miR-4519            | 1 |
| <i>circYY1AP1</i> | miR-4530            | 2 |
| <i>circYY1AP1</i> | miR-4533            | 1 |
| <i>circYY1AP1</i> | miR-4535            | 1 |
| <i>circYY1AP1</i> | miR-4638-3p         | 1 |
| <i>circYY1AP1</i> | miR-4642            | 1 |
| <i>circYY1AP1</i> | miR-4650-3p         | 1 |
| <i>circYY1AP1</i> | miR-4652-3p         | 1 |
| <i>circYY1AP1</i> | miR-4653-3p         | 1 |
| <i>circYY1AP1</i> | miR-4660            | 1 |
| <i>circYY1AP1</i> | miR-4663            | 2 |
| <i>circYY1AP1</i> | miR-4670-3p         | 1 |
| <i>circYY1AP1</i> | miR-4689/6858-5p    | 1 |
| <i>circYY1AP1</i> | miR-4691-3p         | 1 |
| <i>circYY1AP1</i> | miR-4695-5p         | 3 |
| <i>circYY1AP1</i> | miR-4699-5p         | 2 |
| <i>circYY1AP1</i> | miR-4708-5p         | 1 |

|                   |                             |   |
|-------------------|-----------------------------|---|
| <i>circYY1AP1</i> | miR-4709-3p                 | 2 |
| <i>circYY1AP1</i> | miR-4712-3p                 | 1 |
| <i>circYY1AP1</i> | miR-4714-3p                 | 1 |
| <i>circYY1AP1</i> | miR-4715-3p                 | 2 |
| <i>circYY1AP1</i> | miR-4717-5p                 | 4 |
| <i>circYY1AP1</i> | miR-4718                    | 2 |
| <i>circYY1AP1</i> | miR-4719                    | 2 |
| <i>circYY1AP1</i> | miR-4720-5p/4799-3p/5588-5p | 1 |
| <i>circYY1AP1</i> | miR-4725-5p                 | 1 |
| <i>circYY1AP1</i> | miR-4731-3p/4801            | 1 |
| <i>circYY1AP1</i> | miR-4732-3p                 | 1 |
| <i>circYY1AP1</i> | miR-4732-5p                 | 1 |
| <i>circYY1AP1</i> | miR-4733-3p                 | 3 |
| <i>circYY1AP1</i> | miR-4739                    | 1 |
| <i>circYY1AP1</i> | miR-4742-3p                 | 1 |
| <i>circYY1AP1</i> | miR-4743-3p                 | 1 |
| <i>circYY1AP1</i> | miR-4747-5p/5196-5p         | 1 |
| <i>circYY1AP1</i> | miR-4762-5p                 | 1 |
| <i>circYY1AP1</i> | miR-4768-3p                 | 1 |
| <i>circYY1AP1</i> | miR-4772-3p                 | 2 |
| <i>circYY1AP1</i> | miR-4776-3p                 | 2 |
| <i>circYY1AP1</i> | miR-4776-5p                 | 1 |
| <i>circYY1AP1</i> | miR-4778-3p                 | 2 |
| <i>circYY1AP1</i> | miR-4778-5p                 | 1 |
| <i>circYY1AP1</i> | miR-4779                    | 3 |
| <i>circYY1AP1</i> | miR-4782-5p/5706            | 1 |
| <i>circYY1AP1</i> | miR-4802-3p                 | 1 |
| <i>circYY1AP1</i> | miR-486-3p                  | 1 |
| <i>circYY1AP1</i> | miR-490-5p                  | 1 |
| <i>circYY1AP1</i> | miR-493-3p                  | 1 |
| <i>circYY1AP1</i> | miR-4999-5p                 | 2 |
| <i>circYY1AP1</i> | miR-499a-3p/499b-3p         | 1 |
| <i>circYY1AP1</i> | miR-5000-5p                 | 1 |
| <i>circYY1AP1</i> | miR-5007-5p                 | 1 |
| <i>circYY1AP1</i> | miR-5008-5p                 | 3 |
| <i>circYY1AP1</i> | miR-502-5p                  | 1 |
| <i>circYY1AP1</i> | miR-503-5p                  | 1 |
| <i>circYY1AP1</i> | miR-504-3p                  | 1 |

|                   |                                                                   |   |
|-------------------|-------------------------------------------------------------------|---|
| <i>circYY1AP1</i> | miR-504-5p.1                                                      | 1 |
| <i>circYY1AP1</i> | miR-508-5p                                                        | 1 |
| <i>circYY1AP1</i> | miR-5089-5p                                                       | 1 |
| <i>circYY1AP1</i> | miR-5092                                                          | 2 |
| <i>circYY1AP1</i> | miR-5100                                                          | 1 |
| <i>circYY1AP1</i> | miR-511-5p                                                        | 1 |
| <i>circYY1AP1</i> | miR-513c-5p/514b-5p                                               | 3 |
| <i>circYY1AP1</i> | miR-514a-3p                                                       | 1 |
| <i>circYY1AP1</i> | miR-515-5p/519e-5p                                                | 2 |
| <i>circYY1AP1</i> | miR-516b-5p                                                       | 1 |
| <i>circYY1AP1</i> | miR-5189-3p                                                       | 1 |
| <i>circYY1AP1</i> | miR-5195-5p                                                       | 1 |
| <i>circYY1AP1</i> | miR-5197-3p                                                       | 1 |
| <i>circYY1AP1</i> | miR-519d-5p                                                       | 1 |
| <i>circYY1AP1</i> | miR-526b-5p                                                       | 1 |
| <i>circYY1AP1</i> | miR-539-5p                                                        | 1 |
| <i>circYY1AP1</i> | miR-548ac/548bb-3p/548d-3p/548h-3p/548z                           |   |
| <i>circYY1AP1</i> | miR-548aq-3p/548am-3p/548aj-3p/548ah1-3p/548ae-3p/548j-3p/548x-3p |   |
| <i>circYY1AP1</i> | miR-548au-3p                                                      | 1 |
| <i>circYY1AP1</i> | miR-548s                                                          | 1 |
| <i>circYY1AP1</i> | miR-552-5p                                                        | 2 |
| <i>circYY1AP1</i> | miR-5580-5p                                                       | 1 |
| <i>circYY1AP1</i> | miR-5682                                                          | 3 |
| <i>circYY1AP1</i> | miR-5695                                                          | 1 |
| <i>circYY1AP1</i> | miR-5704                                                          | 1 |
| <i>circYY1AP1</i> | miR-573/3616-5p                                                   | 1 |
| <i>circYY1AP1</i> | miR-578                                                           | 2 |
| <i>circYY1AP1</i> | miR-584-3p                                                        | 1 |
| <i>circYY1AP1</i> | miR-585-5p                                                        | 3 |
| <i>circYY1AP1</i> | miR-588                                                           | 1 |
| <i>circYY1AP1</i> | miR-597-5p                                                        | 1 |
| <i>circYY1AP1</i> | miR-605-5p                                                        | 1 |
| <i>circYY1AP1</i> | miR-606                                                           | 1 |
| <i>circYY1AP1</i> | miR-6077                                                          | 2 |
| <i>circYY1AP1</i> | miR-6079                                                          | 1 |
| <i>circYY1AP1</i> | miR-6089                                                          | 3 |
| <i>circYY1AP1</i> | miR-629-3p                                                        | 2 |
| <i>circYY1AP1</i> | miR-632/4288                                                      | 1 |



|                   |                     |   |
|-------------------|---------------------|---|
| <i>circYY1AP1</i> | miR-642-3p          | 1 |
| <i>circYY1AP1</i> | miR-644a            | 2 |
| <i>circYY1AP1</i> | miR-646             | 1 |
| <i>circYY1AP1</i> | miR-647             | 2 |
| <i>circYY1AP1</i> | miR-6499-3p         | 1 |
| <i>circYY1AP1</i> | miR-6509-3p         | 1 |
| <i>circYY1AP1</i> | miR-6509-5p         | 1 |
| <i>circYY1AP1</i> | miR-651-3p          | 3 |
| <i>circYY1AP1</i> | miR-6513-3p         | 1 |
| <i>circYY1AP1</i> | miR-6513-5p         | 1 |
| <i>circYY1AP1</i> | miR-652-5p          | 2 |
| <i>circYY1AP1</i> | miR-654-3p          | 3 |
| <i>circYY1AP1</i> | miR-665             | 3 |
| <i>circYY1AP1</i> | miR-6720-5p         | 2 |
| <i>circYY1AP1</i> | miR-6721-5p         | 1 |
| <i>circYY1AP1</i> | miR-6728-5p         | 1 |
| <i>circYY1AP1</i> | miR-6731-5p/8085    | 1 |
| <i>circYY1AP1</i> | miR-6733-3p         | 1 |
| <i>circYY1AP1</i> | miR-6736-3p         | 1 |
| <i>circYY1AP1</i> | miR-6740-3p         | 1 |
| <i>circYY1AP1</i> | miR-6740-5p         | 1 |
| <i>circYY1AP1</i> | miR-6748-3p         | 1 |
| <i>circYY1AP1</i> | miR-6753-5p         | 3 |
| <i>circYY1AP1</i> | miR-6760-5p         | 1 |
| <i>circYY1AP1</i> | miR-6765-3p         | 2 |
| <i>circYY1AP1</i> | miR-6770-5p         | 1 |
| <i>circYY1AP1</i> | miR-6771-3p         | 1 |
| <i>circYY1AP1</i> | miR-6773-3p         | 1 |
| <i>circYY1AP1</i> | miR-6793-3p         | 2 |
| <i>circYY1AP1</i> | miR-6795-3p         | 1 |
| <i>circYY1AP1</i> | miR-6796-3p         | 1 |
| <i>circYY1AP1</i> | miR-6800-5p         | 1 |
| <i>circYY1AP1</i> | miR-6802-5p         | 1 |
| <i>circYY1AP1</i> | miR-6806-5p         | 1 |
| <i>circYY1AP1</i> | miR-6807-5p         | 2 |
| <i>circYY1AP1</i> | miR-6818-3p         | 1 |
| <i>circYY1AP1</i> | miR-6819-3p/6877-3p | 2 |
| <i>circYY1AP1</i> | miR-6827-5p         | 1 |

|                      |              |   |
|----------------------|--------------|---|
| <i>circYY1AP1</i>    | miR-6832-5p  | 1 |
| <i>circYY1AP1</i>    | miR-6838-3p  | 1 |
| <i>circYY1AP1</i>    | miR-6842-3p  | 2 |
| <i>circYY1AP1</i>    | miR-6853-3p  | 1 |
| <i>circYY1AP1</i>    | miR-6868-5p  | 1 |
| <i>circYY1AP1</i>    | miR-6871-3p  | 3 |
| <i>circYY1AP1</i>    | miR-6871-5p  | 1 |
| <i>circYY1AP1</i>    | miR-6878-5p  | 1 |
| <i>circYY1AP1</i>    | miR-6887-3p  | 1 |
| <i>circYY1AP1</i>    | miR-6890-5p  | 1 |
| <i>circYY1AP1</i>    | miR-6894-5p  | 2 |
| <i>circYY1AP1</i>    | miR-7-5p     | 2 |
| <i>circYY1AP1</i>    | miR-7108-5p  | 2 |
| <i>circYY1AP1</i>    | miR-711      | 1 |
| <i>circYY1AP1</i>    | miR-7151-5p  | 1 |
| <i>circYY1AP1</i>    | miR-7154-3p  | 2 |
| <i>circYY1AP1</i>    | miR-7156-3p  | 2 |
| <i>circYY1AP1</i>    | miR-7160-5p  | 2 |
| <i>circYY1AP1</i>    | miR-7515     | 1 |
| <i>circYY1AP1</i>    | miR-759      | 1 |
| <i>circYY1AP1</i>    | miR-765      | 2 |
| <i>circYY1AP1</i>    | miR-766-3p   | 2 |
| <i>circYY1AP1</i>    | miR-766-5p   | 2 |
| <i>circYY1AP1</i>    | miR-767-5p   | 3 |
| <i>circYY1AP1</i>    | miR-770-5p   | 3 |
| <i>circYY1AP1</i>    | miR-8055     | 1 |
| <i>circYY1AP1</i>    | miR-8077     | 2 |
| <i>circYY1AP1</i>    | miR-873-3p   | 1 |
| <i>circYY1AP1</i>    | miR-887-5p   | 1 |
| <i>circYY1AP1</i>    | miR-922      | 4 |
| <i>circYY1AP1</i>    | miR-936      | 4 |
| <i>circYY1AP1</i>    | miR-99-3p    | 1 |
| <i>circZBED3-AS1</i> | miR-105-5p   | 3 |
| <i>circZBED3-AS1</i> | miR-1179     | 3 |
| <i>circZBED3-AS1</i> | miR-1183     | 2 |
| <i>circZBED3-AS1</i> | miR-1229-3p  | 3 |
| <i>circZBED3-AS1</i> | miR-1245b-3p | 1 |
| <i>circZBED3-AS1</i> | miR-1251-3p  | 1 |

|                      |                                     |   |
|----------------------|-------------------------------------|---|
| <i>circZBED3-AS1</i> | miR-1273d                           | 1 |
| <i>circZBED3-AS1</i> | miR-1288-5p                         | 1 |
| <i>circZBED3-AS1</i> | miR-1295a                           | 1 |
| <i>circZBED3-AS1</i> | miR-1295b-5p/1912                   | 3 |
| <i>circZBED3-AS1</i> | miR-1301-3p                         | 1 |
| <i>circZBED3-AS1</i> | miR-1343-3p                         | 2 |
| <i>circZBED3-AS1</i> | miR-135b-3p                         | 1 |
| <i>circZBED3-AS1</i> | miR-15a-3p                          | 1 |
| <i>circZBED3-AS1</i> | miR-1827                            | 1 |
| <i>circZBED3-AS1</i> | miR-2053                            | 2 |
| <i>circZBED3-AS1</i> | miR-208-5p                          | 1 |
| <i>circZBED3-AS1</i> | miR-20b-3p                          | 1 |
| <i>circZBED3-AS1</i> | miR-214-3p/3619-5p                  | 2 |
| <i>circZBED3-AS1</i> | miR-221-5p/8073                     | 1 |
| <i>circZBED3-AS1</i> | miR-25-3p/32-5p/92-3p/363-3p/367-3p | 2 |
| <i>circZBED3-AS1</i> | miR-27-3p                           | 3 |
| <i>circZBED3-AS1</i> | miR-2861                            | 1 |
| <i>circZBED3-AS1</i> | miR-297                             | 2 |
| <i>circZBED3-AS1</i> | miR-302c-5p                         | 2 |
| <i>circZBED3-AS1</i> | miR-302f                            | 2 |
| <i>circZBED3-AS1</i> | miR-3120-3p                         | 1 |
| <i>circZBED3-AS1</i> | miR-3130-5p/4482-5p                 | 3 |
| <i>circZBED3-AS1</i> | miR-3137                            | 1 |
| <i>circZBED3-AS1</i> | miR-3176/3922-3p                    | 3 |
| <i>circZBED3-AS1</i> | miR-3187-3p                         | 1 |
| <i>circZBED3-AS1</i> | miR-3190-5p                         | 3 |
| <i>circZBED3-AS1</i> | miR-32-3p                           | 1 |
| <i>circZBED3-AS1</i> | miR-324-5p                          | 4 |
| <i>circZBED3-AS1</i> | miR-330-3p.2                        | 3 |
| <i>circZBED3-AS1</i> | miR-342-3p                          | 4 |
| <i>circZBED3-AS1</i> | miR-383-5p.2                        | 2 |
| <i>circZBED3-AS1</i> | miR-3917                            | 1 |
| <i>circZBED3-AS1</i> | miR-3922-5p                         | 1 |
| <i>circZBED3-AS1</i> | miR-3925-3p                         | 5 |
| <i>circZBED3-AS1</i> | miR-3941                            | 1 |
| <i>circZBED3-AS1</i> | miR-411-5p.1                        | 1 |
| <i>circZBED3-AS1</i> | miR-4268                            | 1 |
| <i>circZBED3-AS1</i> | miR-4272                            | 1 |

|                      |                                                                  |   |
|----------------------|------------------------------------------------------------------|---|
| <i>circZBED3-AS1</i> | miR-4289                                                         | 1 |
| <i>circZBED3-AS1</i> | miR-4422                                                         | 3 |
| <i>circZBED3-AS1</i> | miR-4435                                                         | 1 |
| <i>circZBED3-AS1</i> | miR-4448                                                         | 1 |
| <i>circZBED3-AS1</i> | miR-4477a                                                        | 2 |
| <i>circZBED3-AS1</i> | miR-4524b-3p                                                     | 2 |
| <i>circZBED3-AS1</i> | miR-4529-5p                                                      | 1 |
| <i>circZBED3-AS1</i> | miR-4633-3p/6500-5p                                              | 1 |
| <i>circZBED3-AS1</i> | miR-4659a-3p/4659b-3p                                            | 1 |
| <i>circZBED3-AS1</i> | miR-4660                                                         | 1 |
| <i>circZBED3-AS1</i> | miR-4666b                                                        | 1 |
| <i>circZBED3-AS1</i> | miR-4672                                                         | 1 |
| <i>circZBED3-AS1</i> | miR-4695-3p                                                      | 1 |
| <i>circZBED3-AS1</i> | miR-4704-5p                                                      | 1 |
| <i>circZBED3-AS1</i> | miR-4711-3p                                                      | 3 |
| <i>circZBED3-AS1</i> | miR-4717-5p                                                      | 1 |
| <i>circZBED3-AS1</i> | miR-4719                                                         | 1 |
| <i>circZBED3-AS1</i> | miR-4731-3p/4801                                                 | 1 |
| <i>circZBED3-AS1</i> | miR-4742-3p                                                      | 1 |
| <i>circZBED3-AS1</i> | miR-4754                                                         | 1 |
| <i>circZBED3-AS1</i> | miR-4778-3p                                                      | 1 |
| <i>circZBED3-AS1</i> | miR-4793-5p                                                      | 2 |
| <i>circZBED3-AS1</i> | miR-488-5p                                                       | 2 |
| <i>circZBED3-AS1</i> | miR-4999-3p                                                      | 1 |
| <i>circZBED3-AS1</i> | miR-5011-3p                                                      | 1 |
| <i>circZBED3-AS1</i> | miR-502-5p                                                       | 1 |
| <i>circZBED3-AS1</i> | miR-513a-5p                                                      | 3 |
| <i>circZBED3-AS1</i> | miR-518a-5p/527                                                  | 3 |
| <i>circZBED3-AS1</i> | miR-5196-3p                                                      | 2 |
| <i>circZBED3-AS1</i> | miR-525-5p                                                       | 1 |
| <i>circZBED3-AS1</i> | miR-548ao-5p/548ax                                               | 2 |
| <i>circZBED3-AS1</i> | miR-548av-5p/548k/8054                                           | 1 |
| <i>circZBED3-AS1</i> | miR-548aw                                                        | 3 |
| <i>circZBED3-AS1</i> | miR-548ay-5p/548au-5p/548as-5p/548ar-5p/548aq-5p/548ap-5p/548am- | 1 |
| <i>circZBED3-AS1</i> | miR-548e-5p                                                      | 2 |
| <i>circZBED3-AS1</i> | miR-548l                                                         | 1 |
| <i>circZBED3-AS1</i> | miR-548s                                                         | 1 |
| <i>circZBED3-AS1</i> | miR-5571-3p                                                      | 1 |

|                      |                                       |   |
|----------------------|---------------------------------------|---|
| <i>circZBED3-AS1</i> | miR-5579-3p                           | 1 |
| <i>circZBED3-AS1</i> | miR-5585-5p                           | 2 |
| <i>circZBED3-AS1</i> | miR-562                               | 1 |
| <i>circZBED3-AS1</i> | miR-5680                              | 2 |
| <i>circZBED3-AS1</i> | miR-5687                              | 1 |
| <i>circZBED3-AS1</i> | miR-5694                              | 2 |
| <i>circZBED3-AS1</i> | miR-5704                              | 1 |
| <i>circZBED3-AS1</i> | miR-573/3616-5p                       | 2 |
| <i>circZBED3-AS1</i> | miR-586                               | 2 |
| <i>circZBED3-AS1</i> | miR-588                               | 1 |
| <i>circZBED3-AS1</i> | miR-589-3p                            | 1 |
| <i>circZBED3-AS1</i> | miR-592                               | 1 |
| <i>circZBED3-AS1</i> | miR-599                               | 1 |
| <i>circZBED3-AS1</i> | miR-610                               | 1 |
| <i>circZBED3-AS1</i> | miR-617                               | 1 |
| <i>circZBED3-AS1</i> | miR-640                               | 1 |
| <i>circZBED3-AS1</i> | miR-6505-3p                           | 1 |
| <i>circZBED3-AS1</i> | miR-6508-5p/8067                      | 3 |
| <i>circZBED3-AS1</i> | miR-658                               | 1 |
| <i>circZBED3-AS1</i> | miR-6736-3p                           | 1 |
| <i>circZBED3-AS1</i> | miR-6749-5p                           | 1 |
| <i>circZBED3-AS1</i> | miR-675-3p                            | 2 |
| <i>circZBED3-AS1</i> | miR-6758-3p                           | 2 |
| <i>circZBED3-AS1</i> | miR-6765-5p                           | 3 |
| <i>circZBED3-AS1</i> | miR-6806-5p                           | 1 |
| <i>circZBED3-AS1</i> | miR-6818-3p                           | 2 |
| <i>circZBED3-AS1</i> | miR-6850-5p                           | 1 |
| <i>circZBED3-AS1</i> | miR-6875-3p                           | 1 |
| <i>circZBED3-AS1</i> | miR-7151-5p                           | 1 |
| <i>circZBED3-AS1</i> | miR-7156-3p                           | 1 |
| <i>circZBED3-AS1</i> | miR-7641                              | 3 |
| <i>circZBED3-AS1</i> | miR-766-3p                            | 5 |
| <i>circZBED3-AS1</i> | miR-7705                              | 1 |
| <i>circZBED3-AS1</i> | miR-7975                              | 1 |
| <i>circZBED3-AS1</i> | miR-922                               | 2 |
| <i>circZBED3-AS1</i> | let-7a-2-3p/let-7g-3p                 | 1 |
| <i>circZBED3-AS1</i> | let-7a-3p/let-7b-3p/let-7f-1-3p/98-3p | 3 |
| <i>circZBED3-AS1</i> | let-7c-3p                             | 1 |

|                      |                          |   |
|----------------------|--------------------------|---|
| <i>circZBED3-AS1</i> | let-7f-2-3p/1185-3p      | 3 |
| <i>circZBED3-AS1</i> | miR-10-5p                | 1 |
| <i>circZBED3-AS1</i> | miR-122-5p               | 1 |
| <i>circZBED3-AS1</i> | miR-1225-5p              | 1 |
| <i>circZBED3-AS1</i> | miR-1226-3p              | 2 |
| <i>circZBED3-AS1</i> | miR-1226-5p              | 1 |
| <i>circZBED3-AS1</i> | miR-1229-5p              | 1 |
| <i>circZBED3-AS1</i> | miR-1234-3p/7107-5p      | 3 |
| <i>circZBED3-AS1</i> | miR-1243                 | 1 |
| <i>circZBED3-AS1</i> | miR-1247-3p              | 1 |
| <i>circZBED3-AS1</i> | miR-1250-3p              | 1 |
| <i>circZBED3-AS1</i> | miR-1252-5p              | 2 |
| <i>circZBED3-AS1</i> | miR-1253                 | 3 |
| <i>circZBED3-AS1</i> | miR-1255a/1255b-5p       | 2 |
| <i>circZBED3-AS1</i> | miR-1257                 | 1 |
| <i>circZBED3-AS1</i> | miR-1260a/1260b          | 2 |
| <i>circZBED3-AS1</i> | miR-1261                 | 1 |
| <i>circZBED3-AS1</i> | miR-1262/4701-3p/6736-5p | 1 |
| <i>circZBED3-AS1</i> | miR-1264                 | 1 |
| <i>circZBED3-AS1</i> | miR-1265                 | 3 |
| <i>circZBED3-AS1</i> | miR-127-5p               | 2 |
| <i>circZBED3-AS1</i> | miR-1273g-3p             | 1 |
| <i>circZBED3-AS1</i> | miR-1275/4665-5p         | 1 |
| <i>circZBED3-AS1</i> | miR-1278                 | 2 |
| <i>circZBED3-AS1</i> | miR-1279                 | 2 |
| <i>circZBED3-AS1</i> | miR-1285-5p              | 2 |
| <i>circZBED3-AS1</i> | miR-1287-3p              | 2 |
| <i>circZBED3-AS1</i> | miR-1289                 | 1 |
| <i>circZBED3-AS1</i> | miR-129-5p               | 1 |
| <i>circZBED3-AS1</i> | miR-1292-5p              | 1 |
| <i>circZBED3-AS1</i> | miR-1293/4483            | 1 |
| <i>circZBED3-AS1</i> | miR-1298-5p              | 1 |
| <i>circZBED3-AS1</i> | miR-1299                 | 2 |
| <i>circZBED3-AS1</i> | miR-1304-5p              | 1 |
| <i>circZBED3-AS1</i> | miR-1323                 | 2 |
| <i>circZBED3-AS1</i> | miR-1324                 | 1 |
| <i>circZBED3-AS1</i> | miR-133a-5p              | 1 |
| <i>circZBED3-AS1</i> | miR-136-5p               | 2 |

|                      |                                     |   |
|----------------------|-------------------------------------|---|
| <i>circZBED3-AS1</i> | miR-138-5p                          | 1 |
| <i>circZBED3-AS1</i> | miR-139-3p                          | 1 |
| <i>circZBED3-AS1</i> | miR-140-3p.1                        | 1 |
| <i>circZBED3-AS1</i> | miR-140-3p.2                        | 1 |
| <i>circZBED3-AS1</i> | miR-143-5p                          | 1 |
| <i>circZBED3-AS1</i> | miR-145-3p                          | 1 |
| <i>circZBED3-AS1</i> | miR-1468-3p                         | 1 |
| <i>circZBED3-AS1</i> | miR-146b-3p                         | 3 |
| <i>circZBED3-AS1</i> | miR-1470                            | 4 |
| <i>circZBED3-AS1</i> | miR-148b-5p/6874-3p                 | 1 |
| <i>circZBED3-AS1</i> | miR-153-3p                          | 1 |
| <i>circZBED3-AS1</i> | miR-154-3p/487-3p                   | 1 |
| <i>circZBED3-AS1</i> | miR-16-1-3p                         | 1 |
| <i>circZBED3-AS1</i> | miR-16-2-3p/195-3p                  | 1 |
| <i>circZBED3-AS1</i> | miR-17-5p/20-5p/93-5p/106-5p/519-3p | 2 |
| <i>circZBED3-AS1</i> | miR-18-5p                           | 1 |
| <i>circZBED3-AS1</i> | miR-181-5p                          | 1 |
| <i>circZBED3-AS1</i> | miR-182-5p                          | 1 |
| <i>circZBED3-AS1</i> | miR-183-3p                          | 1 |
| <i>circZBED3-AS1</i> | miR-183-5p.1                        | 1 |
| <i>circZBED3-AS1</i> | miR-183-5p.2                        | 1 |
| <i>circZBED3-AS1</i> | miR-187-3p                          | 1 |
| <i>circZBED3-AS1</i> | miR-188-3p                          | 2 |
| <i>circZBED3-AS1</i> | miR-18a-3p                          | 3 |
| <i>circZBED3-AS1</i> | miR-19-5p                           | 1 |
| <i>circZBED3-AS1</i> | miR-190a-3p                         | 1 |
| <i>circZBED3-AS1</i> | miR-1910-5p                         | 2 |
| <i>circZBED3-AS1</i> | miR-1911-3p                         | 2 |
| <i>circZBED3-AS1</i> | miR-1911-5p                         | 3 |
| <i>circZBED3-AS1</i> | miR-1972                            | 2 |
| <i>circZBED3-AS1</i> | miR-200-3p/429                      | 1 |
| <i>circZBED3-AS1</i> | miR-204-3p/4646-5p                  | 1 |
| <i>circZBED3-AS1</i> | miR-2052                            | 1 |
| <i>circZBED3-AS1</i> | miR-20a-3p                          | 1 |
| <i>circZBED3-AS1</i> | miR-21-3p/3591-3p                   | 1 |
| <i>circZBED3-AS1</i> | miR-211-3p                          | 1 |
| <i>circZBED3-AS1</i> | miR-2110                            | 1 |
| <i>circZBED3-AS1</i> | miR-2115-3p                         | 1 |

|                      |                     |   |
|----------------------|---------------------|---|
| <i>circZBED3-AS1</i> | miR-2115-5p         | 1 |
| <i>circZBED3-AS1</i> | miR-216a-5p         | 1 |
| <i>circZBED3-AS1</i> | miR-216b-5p         | 1 |
| <i>circZBED3-AS1</i> | miR-217             | 1 |
| <i>circZBED3-AS1</i> | miR-219a-2-3p       | 1 |
| <i>circZBED3-AS1</i> | miR-219b-3p         | 1 |
| <i>circZBED3-AS1</i> | miR-22-3p           | 1 |
| <i>circZBED3-AS1</i> | miR-222-5p          | 1 |
| <i>circZBED3-AS1</i> | miR-223-3p          | 1 |
| <i>circZBED3-AS1</i> | miR-223-5p          | 1 |
| <i>circZBED3-AS1</i> | miR-224-5p          | 1 |
| <i>circZBED3-AS1</i> | miR-2276-3p         | 1 |
| <i>circZBED3-AS1</i> | miR-2276-5p         | 1 |
| <i>circZBED3-AS1</i> | miR-23-3p           | 1 |
| <i>circZBED3-AS1</i> | miR-2467-5p         | 2 |
| <i>circZBED3-AS1</i> | miR-28-3p           | 1 |
| <i>circZBED3-AS1</i> | miR-29-3p           | 3 |
| <i>circZBED3-AS1</i> | miR-296-3p          | 1 |
| <i>circZBED3-AS1</i> | miR-299-3p          | 3 |
| <i>circZBED3-AS1</i> | miR-299-5p          | 1 |
| <i>circZBED3-AS1</i> | miR-29b-1-5p        | 2 |
| <i>circZBED3-AS1</i> | miR-301a-5p/301b-5p | 2 |
| <i>circZBED3-AS1</i> | miR-3065-5p         | 1 |
| <i>circZBED3-AS1</i> | miR-3074-5p         | 1 |
| <i>circZBED3-AS1</i> | miR-3115            | 2 |
| <i>circZBED3-AS1</i> | miR-3123            | 3 |
| <i>circZBED3-AS1</i> | miR-3124-3p         | 2 |
| <i>circZBED3-AS1</i> | miR-3127-5p         | 1 |
| <i>circZBED3-AS1</i> | miR-3136-3p/7155-3p | 2 |
| <i>circZBED3-AS1</i> | miR-3140-3p         | 1 |
| <i>circZBED3-AS1</i> | miR-3145-5p         | 2 |
| <i>circZBED3-AS1</i> | miR-3148            | 2 |
| <i>circZBED3-AS1</i> | miR-3149            | 2 |
| <i>circZBED3-AS1</i> | miR-3150a-3p        | 1 |
| <i>circZBED3-AS1</i> | miR-3151-5p         | 1 |
| <i>circZBED3-AS1</i> | miR-3154            | 3 |
| <i>circZBED3-AS1</i> | miR-3156-3p         | 2 |
| <i>circZBED3-AS1</i> | miR-3156-5p         | 1 |



|                      |                           |   |
|----------------------|---------------------------|---|
| <i>circZBED3-AS1</i> | miR-3157-3p               | 3 |
| <i>circZBED3-AS1</i> | miR-3160-3p               | 1 |
| <i>circZBED3-AS1</i> | miR-3163                  | 1 |
| <i>circZBED3-AS1</i> | miR-3168                  | 1 |
| <i>circZBED3-AS1</i> | miR-3173-5p               | 3 |
| <i>circZBED3-AS1</i> | miR-3175                  | 2 |
| <i>circZBED3-AS1</i> | miR-3179                  | 1 |
| <i>circZBED3-AS1</i> | miR-3184-3p               | 1 |
| <i>circZBED3-AS1</i> | miR-3185                  | 1 |
| <i>circZBED3-AS1</i> | miR-3188                  | 2 |
| <i>circZBED3-AS1</i> | miR-3191-5p               | 2 |
| <i>circZBED3-AS1</i> | miR-3192-5p               | 1 |
| <i>circZBED3-AS1</i> | miR-3193                  | 1 |
| <i>circZBED3-AS1</i> | miR-3194-5p               | 1 |
| <i>circZBED3-AS1</i> | miR-323-3p                | 1 |
| <i>circZBED3-AS1</i> | miR-323b-5p/410-5p/494-5p | 2 |
| <i>circZBED3-AS1</i> | miR-324-3p/1913           | 3 |
| <i>circZBED3-AS1</i> | miR-326                   | 2 |
| <i>circZBED3-AS1</i> | miR-338-3p                | 3 |
| <i>circZBED3-AS1</i> | miR-338-5p                | 2 |
| <i>circZBED3-AS1</i> | miR-339-5p                | 3 |
| <i>circZBED3-AS1</i> | miR-33a-3p                | 2 |
| <i>circZBED3-AS1</i> | miR-34-5p/449-5p          | 1 |
| <i>circZBED3-AS1</i> | miR-340-5p                | 1 |
| <i>circZBED3-AS1</i> | miR-342-5p/4664-5p        | 1 |
| <i>circZBED3-AS1</i> | miR-3607-3p               | 1 |
| <i>circZBED3-AS1</i> | miR-3607-5p               | 4 |
| <i>circZBED3-AS1</i> | miR-361-5p                | 1 |
| <i>circZBED3-AS1</i> | miR-3613-3p               | 3 |
| <i>circZBED3-AS1</i> | miR-3613-5p               | 2 |
| <i>circZBED3-AS1</i> | miR-3621                  | 1 |
| <i>circZBED3-AS1</i> | miR-3622a-3p/3622b-3p     | 2 |
| <i>circZBED3-AS1</i> | miR-363-5p/6745           | 1 |
| <i>circZBED3-AS1</i> | miR-3652/4430             | 2 |
| <i>circZBED3-AS1</i> | miR-3654                  | 1 |
| <i>circZBED3-AS1</i> | miR-3656                  | 1 |
| <i>circZBED3-AS1</i> | miR-3659                  | 1 |
| <i>circZBED3-AS1</i> | miR-3662                  | 5 |

|                      |                           |   |
|----------------------|---------------------------|---|
| <i>circZBED3-AS1</i> | miR-3663-3p               | 1 |
| <i>circZBED3-AS1</i> | miR-3663-5p               | 1 |
| <i>circZBED3-AS1</i> | miR-3664-5p               | 2 |
| <i>circZBED3-AS1</i> | miR-3667-3p               | 2 |
| <i>circZBED3-AS1</i> | miR-3667-5p               | 2 |
| <i>circZBED3-AS1</i> | miR-3671                  | 2 |
| <i>circZBED3-AS1</i> | miR-3680-3p               | 1 |
| <i>circZBED3-AS1</i> | miR-3688-3p               | 1 |
| <i>circZBED3-AS1</i> | miR-369-3p                | 1 |
| <i>circZBED3-AS1</i> | miR-3690                  | 1 |
| <i>circZBED3-AS1</i> | miR-3692-3p               | 2 |
| <i>circZBED3-AS1</i> | miR-3692-5p               | 1 |
| <i>circZBED3-AS1</i> | miR-370-3p                | 1 |
| <i>circZBED3-AS1</i> | miR-371-5p                | 4 |
| <i>circZBED3-AS1</i> | miR-371b-5p/373-5p/616-5p | 4 |
| <i>circZBED3-AS1</i> | miR-372-5p                | 4 |
| <i>circZBED3-AS1</i> | miR-374-5p                | 1 |
| <i>circZBED3-AS1</i> | miR-374a-3p               | 1 |
| <i>circZBED3-AS1</i> | miR-374b-3p               | 1 |
| <i>circZBED3-AS1</i> | miR-374c-3p               | 1 |
| <i>circZBED3-AS1</i> | miR-376b-5p/376c-5p       | 1 |
| <i>circZBED3-AS1</i> | miR-378-3p                | 1 |
| <i>circZBED3-AS1</i> | miR-378j/6839-5p          | 1 |
| <i>circZBED3-AS1</i> | miR-381-3p                | 5 |
| <i>circZBED3-AS1</i> | miR-382-3p                | 1 |
| <i>circZBED3-AS1</i> | miR-382-5p                | 1 |
| <i>circZBED3-AS1</i> | miR-383-5p.1              | 1 |
| <i>circZBED3-AS1</i> | miR-3908                  | 3 |
| <i>circZBED3-AS1</i> | miR-3909                  | 3 |
| <i>circZBED3-AS1</i> | miR-3912-5p               | 1 |
| <i>circZBED3-AS1</i> | miR-3914                  | 1 |
| <i>circZBED3-AS1</i> | miR-3919                  | 1 |
| <i>circZBED3-AS1</i> | miR-3921/4653-5p          | 2 |
| <i>circZBED3-AS1</i> | miR-3925-5p               | 3 |
| <i>circZBED3-AS1</i> | miR-3928-5p/6806-3p       | 2 |
| <i>circZBED3-AS1</i> | miR-3929/4419b/4478       | 4 |
| <i>circZBED3-AS1</i> | miR-3936                  | 1 |
| <i>circZBED3-AS1</i> | miR-3938                  | 1 |

|                      |                       |   |
|----------------------|-----------------------|---|
| <i>circZBED3-AS1</i> | miR-3942-5p           | 3 |
| <i>circZBED3-AS1</i> | miR-3975              | 2 |
| <i>circZBED3-AS1</i> | miR-3977              | 1 |
| <i>circZBED3-AS1</i> | miR-3978              | 1 |
| <i>circZBED3-AS1</i> | miR-410-3p            | 1 |
| <i>circZBED3-AS1</i> | miR-4251              | 2 |
| <i>circZBED3-AS1</i> | miR-4254              | 1 |
| <i>circZBED3-AS1</i> | miR-4255              | 1 |
| <i>circZBED3-AS1</i> | miR-4256              | 1 |
| <i>circZBED3-AS1</i> | miR-4263              | 2 |
| <i>circZBED3-AS1</i> | miR-4264              | 1 |
| <i>circZBED3-AS1</i> | miR-4266              | 2 |
| <i>circZBED3-AS1</i> | miR-4270/4441/6754-5p | 1 |
| <i>circZBED3-AS1</i> | miR-4279              | 3 |
| <i>circZBED3-AS1</i> | miR-4280              | 1 |
| <i>circZBED3-AS1</i> | miR-4282              | 1 |
| <i>circZBED3-AS1</i> | miR-4292/6791-5p      | 1 |
| <i>circZBED3-AS1</i> | miR-4294              | 1 |
| <i>circZBED3-AS1</i> | miR-4299              | 2 |
| <i>circZBED3-AS1</i> | miR-4301              | 2 |
| <i>circZBED3-AS1</i> | miR-4307              | 1 |
| <i>circZBED3-AS1</i> | miR-4308              | 1 |
| <i>circZBED3-AS1</i> | miR-431-5p            | 1 |
| <i>circZBED3-AS1</i> | miR-4310/7157-5p      | 2 |
| <i>circZBED3-AS1</i> | miR-4328              | 1 |
| <i>circZBED3-AS1</i> | miR-4329              | 2 |
| <i>circZBED3-AS1</i> | miR-433-3p            | 2 |
| <i>circZBED3-AS1</i> | miR-4330              | 2 |
| <i>circZBED3-AS1</i> | miR-4417              | 2 |
| <i>circZBED3-AS1</i> | miR-4421/5699-3p      | 3 |
| <i>circZBED3-AS1</i> | miR-4426/4647/4662b   | 1 |
| <i>circZBED3-AS1</i> | miR-4427              | 1 |
| <i>circZBED3-AS1</i> | miR-4433b-3p          | 2 |
| <i>circZBED3-AS1</i> | miR-4434/4516/5703    | 1 |
| <i>circZBED3-AS1</i> | miR-4436b-5p          | 3 |
| <i>circZBED3-AS1</i> | miR-4440              | 1 |
| <i>circZBED3-AS1</i> | miR-4446-5p           | 2 |
| <i>circZBED3-AS1</i> | miR-4447/4472         | 1 |

|                      |                  |   |
|----------------------|------------------|---|
| <i>circZBED3-AS1</i> | miR-4452         | 1 |
| <i>circZBED3-AS1</i> | miR-4456         | 2 |
| <i>circZBED3-AS1</i> | miR-4461         | 1 |
| <i>circZBED3-AS1</i> | miR-4463         | 1 |
| <i>circZBED3-AS1</i> | miR-4464/4748    | 2 |
| <i>circZBED3-AS1</i> | miR-4471/8059    | 1 |
| <i>circZBED3-AS1</i> | miR-4475         | 1 |
| <i>circZBED3-AS1</i> | miR-4476/6876-5p | 1 |
| <i>circZBED3-AS1</i> | miR-4477b        | 1 |
| <i>circZBED3-AS1</i> | miR-448          | 1 |
| <i>circZBED3-AS1</i> | miR-4487         | 1 |
| <i>circZBED3-AS1</i> | miR-4490         | 1 |
| <i>circZBED3-AS1</i> | miR-4491/4657    | 3 |
| <i>circZBED3-AS1</i> | miR-4494         | 1 |
| <i>circZBED3-AS1</i> | miR-4496         | 1 |
| <i>circZBED3-AS1</i> | miR-4499         | 1 |
| <i>circZBED3-AS1</i> | miR-4501         | 2 |
| <i>circZBED3-AS1</i> | miR-4503         | 1 |
| <i>circZBED3-AS1</i> | miR-4505/5787    | 2 |
| <i>circZBED3-AS1</i> | miR-4509         | 1 |
| <i>circZBED3-AS1</i> | miR-450b-5p      | 1 |
| <i>circZBED3-AS1</i> | miR-4513/6855-3p | 1 |
| <i>circZBED3-AS1</i> | miR-4517         | 1 |
| <i>circZBED3-AS1</i> | miR-451b         | 1 |
| <i>circZBED3-AS1</i> | miR-4522         | 2 |
| <i>circZBED3-AS1</i> | miR-4528         | 3 |
| <i>circZBED3-AS1</i> | miR-4530         | 3 |
| <i>circZBED3-AS1</i> | miR-4535         | 1 |
| <i>circZBED3-AS1</i> | miR-455-3p.1     | 2 |
| <i>circZBED3-AS1</i> | miR-455-3p.2     | 1 |
| <i>circZBED3-AS1</i> | miR-4635         | 1 |
| <i>circZBED3-AS1</i> | miR-4638-3p      | 1 |
| <i>circZBED3-AS1</i> | miR-4645-3p      | 1 |
| <i>circZBED3-AS1</i> | miR-4645-5p/4673 | 2 |
| <i>circZBED3-AS1</i> | miR-4650-5p      | 2 |
| <i>circZBED3-AS1</i> | miR-4652-3p      | 1 |
| <i>circZBED3-AS1</i> | miR-4661-3p      | 2 |
| <i>circZBED3-AS1</i> | miR-4661-5p      | 1 |

|                      |                          |   |
|----------------------|--------------------------|---|
| <i>circZBED3-AS1</i> | miR-4663                 | 2 |
| <i>circZBED3-AS1</i> | miR-4665-3p              | 3 |
| <i>circZBED3-AS1</i> | miR-4666a-3p             | 5 |
| <i>circZBED3-AS1</i> | miR-4666a-5p             | 3 |
| <i>circZBED3-AS1</i> | miR-4667-3p              | 4 |
| <i>circZBED3-AS1</i> | miR-4667-5p/4700-5p/8089 | 1 |
| <i>circZBED3-AS1</i> | miR-4678                 | 2 |
| <i>circZBED3-AS1</i> | miR-4680-3p              | 1 |
| <i>circZBED3-AS1</i> | miR-4680-5p              | 1 |
| <i>circZBED3-AS1</i> | miR-4682                 | 1 |
| <i>circZBED3-AS1</i> | miR-4683                 | 1 |
| <i>circZBED3-AS1</i> | miR-4694-3p              | 1 |
| <i>circZBED3-AS1</i> | miR-4694-5p              | 1 |
| <i>circZBED3-AS1</i> | miR-4697-3p              | 1 |
| <i>circZBED3-AS1</i> | miR-4698                 | 3 |
| <i>circZBED3-AS1</i> | miR-4699-3p              | 2 |
| <i>circZBED3-AS1</i> | miR-4708-3p              | 1 |
| <i>circZBED3-AS1</i> | miR-4710                 | 1 |
| <i>circZBED3-AS1</i> | miR-4714-5p              | 2 |
| <i>circZBED3-AS1</i> | miR-4716-5p              | 4 |
| <i>circZBED3-AS1</i> | miR-4722-3p/6727-3p      | 3 |
| <i>circZBED3-AS1</i> | miR-4724-5p              | 2 |
| <i>circZBED3-AS1</i> | miR-4725-5p              | 1 |
| <i>circZBED3-AS1</i> | miR-4733-3p              | 2 |
| <i>circZBED3-AS1</i> | miR-4733-5p              | 2 |
| <i>circZBED3-AS1</i> | miR-4738-3p              | 1 |
| <i>circZBED3-AS1</i> | miR-4739                 | 1 |
| <i>circZBED3-AS1</i> | miR-4743-3p              | 1 |
| <i>circZBED3-AS1</i> | miR-4744                 | 1 |
| <i>circZBED3-AS1</i> | miR-4747-3p              | 2 |
| <i>circZBED3-AS1</i> | miR-4747-5p/5196-5p      | 1 |
| <i>circZBED3-AS1</i> | miR-4752                 | 1 |
| <i>circZBED3-AS1</i> | miR-4755-5p/5006-3p      | 3 |
| <i>circZBED3-AS1</i> | miR-4756-3p              | 1 |
| <i>circZBED3-AS1</i> | miR-4757-5p/6744-3p      | 2 |
| <i>circZBED3-AS1</i> | miR-4762-5p              | 1 |
| <i>circZBED3-AS1</i> | miR-4763-5p              | 3 |
| <i>circZBED3-AS1</i> | miR-4764-5p              | 1 |

|                      |                     |   |
|----------------------|---------------------|---|
| <i>circZBED3-AS1</i> | miR-4766-3p         | 3 |
| <i>circZBED3-AS1</i> | miR-4766-5p         | 1 |
| <i>circZBED3-AS1</i> | miR-4768-5p/6833-3p | 1 |
| <i>circZBED3-AS1</i> | miR-4772-3p         | 1 |
| <i>circZBED3-AS1</i> | miR-4772-5p         | 1 |
| <i>circZBED3-AS1</i> | miR-4774-5p         | 1 |
| <i>circZBED3-AS1</i> | miR-4775            | 1 |
| <i>circZBED3-AS1</i> | miR-4776-5p         | 1 |
| <i>circZBED3-AS1</i> | miR-4777-5p         | 1 |
| <i>circZBED3-AS1</i> | miR-4778-5p         | 1 |
| <i>circZBED3-AS1</i> | miR-4781-5p         | 1 |
| <i>circZBED3-AS1</i> | miR-4782-5p/5706    | 2 |
| <i>circZBED3-AS1</i> | miR-4785            | 1 |
| <i>circZBED3-AS1</i> | miR-4789-5p         | 3 |
| <i>circZBED3-AS1</i> | miR-4790-3p         | 1 |
| <i>circZBED3-AS1</i> | miR-4792            | 1 |
| <i>circZBED3-AS1</i> | miR-4797-3p         | 1 |
| <i>circZBED3-AS1</i> | miR-4797-5p         | 1 |
| <i>circZBED3-AS1</i> | miR-4799-5p         | 3 |
| <i>circZBED3-AS1</i> | miR-4802-3p         | 1 |
| <i>circZBED3-AS1</i> | miR-483-3p.2        | 2 |
| <i>circZBED3-AS1</i> | miR-485-5p          | 2 |
| <i>circZBED3-AS1</i> | miR-488-3p          | 2 |
| <i>circZBED3-AS1</i> | miR-491-5p          | 1 |
| <i>circZBED3-AS1</i> | miR-493-5p          | 1 |
| <i>circZBED3-AS1</i> | miR-494-3p          | 1 |
| <i>circZBED3-AS1</i> | miR-495-3p          | 1 |
| <i>circZBED3-AS1</i> | miR-495-5p          | 1 |
| <i>circZBED3-AS1</i> | miR-497-3p          | 1 |
| <i>circZBED3-AS1</i> | miR-499b-5p         | 1 |
| <i>circZBED3-AS1</i> | miR-5003-3p         | 2 |
| <i>circZBED3-AS1</i> | miR-500a-5p         | 1 |
| <i>circZBED3-AS1</i> | miR-500b-3p         | 3 |
| <i>circZBED3-AS1</i> | miR-504-3p          | 2 |
| <i>circZBED3-AS1</i> | miR-504-5p.1        | 1 |
| <i>circZBED3-AS1</i> | miR-506-5p          | 1 |
| <i>circZBED3-AS1</i> | miR-507/557         | 1 |
| <i>circZBED3-AS1</i> | miR-508-5p          | 2 |

|                      |                                                                  |   |
|----------------------|------------------------------------------------------------------|---|
| <i>circZBED3-AS1</i> | miR-509-3-5p/509-5p/4418                                         | 1 |
| <i>circZBED3-AS1</i> | miR-5092                                                         | 1 |
| <i>circZBED3-AS1</i> | miR-5096                                                         | 1 |
| <i>circZBED3-AS1</i> | miR-5100                                                         | 1 |
| <i>circZBED3-AS1</i> | miR-511-3p                                                       | 1 |
| <i>circZBED3-AS1</i> | miR-511-5p                                                       | 1 |
| <i>circZBED3-AS1</i> | miR-513a-3p/513c-3p/3606-3p                                      | 2 |
| <i>circZBED3-AS1</i> | miR-513b-3p                                                      | 2 |
| <i>circZBED3-AS1</i> | miR-513c-5p/514b-5p                                              | 2 |
| <i>circZBED3-AS1</i> | miR-514a-5p                                                      | 2 |
| <i>circZBED3-AS1</i> | miR-515-5p/519e-5p                                               | 2 |
| <i>circZBED3-AS1</i> | miR-516a-3p/516b-3p/7162-5p                                      | 1 |
| <i>circZBED3-AS1</i> | miR-516b-5p                                                      | 2 |
| <i>circZBED3-AS1</i> | miR-5186                                                         | 1 |
| <i>circZBED3-AS1</i> | miR-5187-3p                                                      | 1 |
| <i>circZBED3-AS1</i> | miR-518c-5p                                                      | 2 |
| <i>circZBED3-AS1</i> | miR-518d-5p/519-5p                                               | 1 |
| <i>circZBED3-AS1</i> | miR-5193                                                         | 4 |
| <i>circZBED3-AS1</i> | miR-522-3p                                                       | 1 |
| <i>circZBED3-AS1</i> | miR-524-5p                                                       | 2 |
| <i>circZBED3-AS1</i> | miR-526b-5p                                                      | 1 |
| <i>circZBED3-AS1</i> | miR-539-3p                                                       | 2 |
| <i>circZBED3-AS1</i> | miR-543                                                          | 1 |
| <i>circZBED3-AS1</i> | miR-545-5p                                                       | 1 |
| <i>circZBED3-AS1</i> | miR-548ac/548bb-3p/548d-3p/548h-3p/548z                          | 1 |
| <i>circZBED3-AS1</i> | miR-548ah-5p/3609                                                | 2 |
| <i>circZBED3-AS1</i> | miR-548aj-5p/548f-5p/548g-5p/548x-5p                             | 1 |
| <i>circZBED3-AS1</i> | miR-548ao-3p                                                     | 2 |
| <i>circZBED3-AS1</i> | miR-548ap-3p/548aa/548t-3p                                       | 2 |
| <i>circZBED3-AS1</i> | miR-548aq-3p/548am-3p/548aj-3p/548al-3p/548ae-3p/548j-3p/548x-3p | 1 |
| <i>circZBED3-AS1</i> | miR-548as-3p                                                     | 2 |
| <i>circZBED3-AS1</i> | miR-548at-5p                                                     | 1 |
| <i>circZBED3-AS1</i> | miR-548au-3p                                                     | 1 |
| <i>circZBED3-AS1</i> | miR-548av-3p                                                     | 1 |
| <i>circZBED3-AS1</i> | miR-548ay-3p/548at-3p                                            | 2 |
| <i>circZBED3-AS1</i> | miR-548az-3p/548ar-3p/548a-3p/548e-3p/548f-3p                    | 1 |
| <i>circZBED3-AS1</i> | miR-548g-3p                                                      | 3 |
| <i>circZBED3-AS1</i> | miR-548q                                                         | 2 |

|                      |                  |   |
|----------------------|------------------|---|
| <i>circZBED3-AS1</i> | miR-552-3p       | 2 |
| <i>circZBED3-AS1</i> | miR-556-3p       | 1 |
| <i>circZBED3-AS1</i> | miR-5571-5p      | 3 |
| <i>circZBED3-AS1</i> | miR-558          | 1 |
| <i>circZBED3-AS1</i> | miR-5580-3p      | 1 |
| <i>circZBED3-AS1</i> | miR-5580-5p      | 2 |
| <i>circZBED3-AS1</i> | miR-5581-3p      | 2 |
| <i>circZBED3-AS1</i> | miR-5582-3p      | 1 |
| <i>circZBED3-AS1</i> | miR-5583-3p      | 1 |
| <i>circZBED3-AS1</i> | miR-5584-3p      | 1 |
| <i>circZBED3-AS1</i> | miR-5584-5p      | 1 |
| <i>circZBED3-AS1</i> | miR-5585-3p      | 1 |
| <i>circZBED3-AS1</i> | miR-5586-5p      | 2 |
| <i>circZBED3-AS1</i> | miR-5591-3p      | 1 |
| <i>circZBED3-AS1</i> | miR-561-3p       | 1 |
| <i>circZBED3-AS1</i> | miR-568          | 1 |
| <i>circZBED3-AS1</i> | miR-5681b        | 2 |
| <i>circZBED3-AS1</i> | miR-5692bc       | 1 |
| <i>circZBED3-AS1</i> | miR-570-3p       | 1 |
| <i>circZBED3-AS1</i> | miR-5700         | 2 |
| <i>circZBED3-AS1</i> | miR-5701         | 2 |
| <i>circZBED3-AS1</i> | miR-5702         | 1 |
| <i>circZBED3-AS1</i> | miR-574-5p       | 1 |
| <i>circZBED3-AS1</i> | miR-575/4676-5p  | 1 |
| <i>circZBED3-AS1</i> | miR-576-5p       | 2 |
| <i>circZBED3-AS1</i> | miR-593-3p       | 2 |
| <i>circZBED3-AS1</i> | miR-593-5p       | 6 |
| <i>circZBED3-AS1</i> | miR-595          | 1 |
| <i>circZBED3-AS1</i> | miR-597-5p       | 1 |
| <i>circZBED3-AS1</i> | miR-605-5p       | 1 |
| <i>circZBED3-AS1</i> | miR-6071         | 1 |
| <i>circZBED3-AS1</i> | miR-6072/6891-3p | 5 |
| <i>circZBED3-AS1</i> | miR-6077         | 1 |
| <i>circZBED3-AS1</i> | miR-6079         | 1 |
| <i>circZBED3-AS1</i> | miR-608/4651     | 1 |
| <i>circZBED3-AS1</i> | miR-6081         | 1 |
| <i>circZBED3-AS1</i> | miR-6090         | 1 |
| <i>circZBED3-AS1</i> | miR-6124         | 2 |



|                      |                    |   |
|----------------------|--------------------|---|
| <i>circZBED3-AS1</i> | miR-6128           | 1 |
| <i>circZBED3-AS1</i> | miR-6131           | 1 |
| <i>circZBED3-AS1</i> | miR-618            | 1 |
| <i>circZBED3-AS1</i> | miR-619-3p         | 2 |
| <i>circZBED3-AS1</i> | miR-619-5p/6506-5p | 1 |
| <i>circZBED3-AS1</i> | miR-622            | 1 |
| <i>circZBED3-AS1</i> | miR-624-3p         | 1 |
| <i>circZBED3-AS1</i> | miR-627-3p         | 2 |
| <i>circZBED3-AS1</i> | miR-627-5p         | 1 |
| <i>circZBED3-AS1</i> | miR-629-3p         | 3 |
| <i>circZBED3-AS1</i> | miR-637            | 1 |
| <i>circZBED3-AS1</i> | miR-642a-5p        | 3 |
| <i>circZBED3-AS1</i> | miR-645            | 2 |
| <i>circZBED3-AS1</i> | miR-6507-3p        | 1 |
| <i>circZBED3-AS1</i> | miR-6507-5p        | 1 |
| <i>circZBED3-AS1</i> | miR-6509-3p        | 3 |
| <i>circZBED3-AS1</i> | miR-651-3p         | 2 |
| <i>circZBED3-AS1</i> | miR-651-5p         | 1 |
| <i>circZBED3-AS1</i> | miR-6511-3p        | 2 |
| <i>circZBED3-AS1</i> | miR-6516-3p        | 3 |
| <i>circZBED3-AS1</i> | miR-6516-5p        | 1 |
| <i>circZBED3-AS1</i> | miR-653-5p         | 1 |
| <i>circZBED3-AS1</i> | miR-654-3p         | 1 |
| <i>circZBED3-AS1</i> | miR-654-5p         | 3 |
| <i>circZBED3-AS1</i> | miR-660-3p         | 4 |
| <i>circZBED3-AS1</i> | miR-660-5p         | 1 |
| <i>circZBED3-AS1</i> | miR-671-5p         | 1 |
| <i>circZBED3-AS1</i> | miR-6715a-3p       | 1 |
| <i>circZBED3-AS1</i> | miR-6715b-3p       | 1 |
| <i>circZBED3-AS1</i> | miR-6720-5p        | 2 |
| <i>circZBED3-AS1</i> | miR-6728-3p        | 1 |
| <i>circZBED3-AS1</i> | miR-6731-5p/8085   | 2 |
| <i>circZBED3-AS1</i> | miR-6734-3p        | 2 |
| <i>circZBED3-AS1</i> | miR-6734-5p        | 1 |
| <i>circZBED3-AS1</i> | miR-6735-3p        | 3 |
| <i>circZBED3-AS1</i> | miR-6741-5p        | 1 |
| <i>circZBED3-AS1</i> | miR-6742-3p        | 2 |
| <i>circZBED3-AS1</i> | miR-6742-5p        | 1 |

|                      |                             |   |
|----------------------|-----------------------------|---|
| <i>circZBED3-AS1</i> | miR-6744-5p                 | 2 |
| <i>circZBED3-AS1</i> | miR-6747-3p                 | 3 |
| <i>circZBED3-AS1</i> | miR-6747-5p                 | 1 |
| <i>circZBED3-AS1</i> | miR-6748-3p                 | 3 |
| <i>circZBED3-AS1</i> | miR-6750-5p/6822-5p         | 1 |
| <i>circZBED3-AS1</i> | miR-6751-5p/6803-5p         | 1 |
| <i>circZBED3-AS1</i> | miR-6752-5p/6842-5p/7110-5p | 1 |
| <i>circZBED3-AS1</i> | miR-6753-5p                 | 2 |
| <i>circZBED3-AS1</i> | miR-6756-5p/6766-5p         | 1 |
| <i>circZBED3-AS1</i> | miR-6758-5p/6856-5p         | 2 |
| <i>circZBED3-AS1</i> | miR-676-3p                  | 3 |
| <i>circZBED3-AS1</i> | miR-6760-5p                 | 1 |
| <i>circZBED3-AS1</i> | miR-6761-5p                 | 2 |
| <i>circZBED3-AS1</i> | miR-6764-3p/6824-3p         | 2 |
| <i>circZBED3-AS1</i> | miR-6765-3p                 | 2 |
| <i>circZBED3-AS1</i> | miR-6769a-5p/6769b-5p       | 3 |
| <i>circZBED3-AS1</i> | miR-6770-5p                 | 3 |
| <i>circZBED3-AS1</i> | miR-6774-3p                 | 1 |
| <i>circZBED3-AS1</i> | miR-6777-3p                 | 2 |
| <i>circZBED3-AS1</i> | miR-6778-3p                 | 2 |
| <i>circZBED3-AS1</i> | miR-6780a-3p                | 1 |
| <i>circZBED3-AS1</i> | miR-6782-3p                 | 1 |
| <i>circZBED3-AS1</i> | miR-6783-5p                 | 1 |
| <i>circZBED3-AS1</i> | miR-6784-3p/6862-3p         | 2 |
| <i>circZBED3-AS1</i> | miR-6791-3p/6829-3p         | 2 |
| <i>circZBED3-AS1</i> | miR-6792-5p                 | 1 |
| <i>circZBED3-AS1</i> | miR-6794-3p                 | 1 |
| <i>circZBED3-AS1</i> | miR-6795-3p                 | 2 |
| <i>circZBED3-AS1</i> | miR-6796-3p                 | 2 |
| <i>circZBED3-AS1</i> | miR-6802-3p                 | 2 |
| <i>circZBED3-AS1</i> | miR-6804-3p                 | 4 |
| <i>circZBED3-AS1</i> | miR-6804-5p                 | 1 |
| <i>circZBED3-AS1</i> | miR-6809-3p                 | 1 |
| <i>circZBED3-AS1</i> | miR-6810-5p                 | 1 |
| <i>circZBED3-AS1</i> | miR-6825-5p                 | 2 |
| <i>circZBED3-AS1</i> | miR-6826-3p                 | 2 |
| <i>circZBED3-AS1</i> | miR-6826-5p                 | 1 |
| <i>circZBED3-AS1</i> | miR-6827-5p                 | 1 |

|                      |                     |   |
|----------------------|---------------------|---|
| <i>circZBED3-AS1</i> | miR-6828-3p         | 1 |
| <i>circZBED3-AS1</i> | miR-6828-5p         | 1 |
| <i>circZBED3-AS1</i> | miR-6830-5p         | 1 |
| <i>circZBED3-AS1</i> | miR-6833-5p         | 1 |
| <i>circZBED3-AS1</i> | miR-6834-3p         | 1 |
| <i>circZBED3-AS1</i> | miR-6834-5p         | 1 |
| <i>circZBED3-AS1</i> | miR-6835-5p         | 1 |
| <i>circZBED3-AS1</i> | miR-6838-3p         | 1 |
| <i>circZBED3-AS1</i> | miR-6843-3p/6848-3p | 1 |
| <i>circZBED3-AS1</i> | miR-6845-3p         | 2 |
| <i>circZBED3-AS1</i> | miR-6852-5p         | 2 |
| <i>circZBED3-AS1</i> | miR-6857-3p         | 1 |
| <i>circZBED3-AS1</i> | miR-6857-5p         | 1 |
| <i>circZBED3-AS1</i> | miR-6858-3p         | 1 |
| <i>circZBED3-AS1</i> | miR-6868-3p         | 5 |
| <i>circZBED3-AS1</i> | miR-6869-5p         | 1 |
| <i>circZBED3-AS1</i> | miR-6871-3p         | 3 |
| <i>circZBED3-AS1</i> | miR-6873-3p         | 1 |
| <i>circZBED3-AS1</i> | miR-6874-5p         | 2 |
| <i>circZBED3-AS1</i> | miR-6878-3p         | 2 |
| <i>circZBED3-AS1</i> | miR-6878-5p         | 2 |
| <i>circZBED3-AS1</i> | miR-6879-3p         | 1 |
| <i>circZBED3-AS1</i> | miR-6881-3p         | 1 |
| <i>circZBED3-AS1</i> | miR-6884-3p         | 1 |
| <i>circZBED3-AS1</i> | miR-6885-3p         | 1 |
| <i>circZBED3-AS1</i> | miR-6887-3p         | 2 |
| <i>circZBED3-AS1</i> | miR-6892-3p         | 1 |
| <i>circZBED3-AS1</i> | miR-6895-3p         | 2 |
| <i>circZBED3-AS1</i> | miR-7-5p            | 1 |
| <i>circZBED3-AS1</i> | miR-708-3p          | 2 |
| <i>circZBED3-AS1</i> | miR-7106-3p         | 2 |
| <i>circZBED3-AS1</i> | miR-7109-3p         | 1 |
| <i>circZBED3-AS1</i> | miR-7109-5p         | 1 |
| <i>circZBED3-AS1</i> | miR-711             | 1 |
| <i>circZBED3-AS1</i> | miR-7111-3p         | 1 |
| <i>circZBED3-AS1</i> | miR-7150            | 1 |
| <i>circZBED3-AS1</i> | miR-7152-3p         | 1 |
| <i>circZBED3-AS1</i> | miR-7152-5p         | 1 |

|                      |                              |   |
|----------------------|------------------------------|---|
| <i>circZBED3-AS1</i> | miR-7153-3p                  | 1 |
| <i>circZBED3-AS1</i> | miR-7154-5p                  | 2 |
| <i>circZBED3-AS1</i> | miR-7155-5p                  | 1 |
| <i>circZBED3-AS1</i> | miR-7160-5p                  | 2 |
| <i>circZBED3-AS1</i> | miR-7515                     | 1 |
| <i>circZBED3-AS1</i> | miR-759                      | 3 |
| <i>circZBED3-AS1</i> | miR-767-5p                   | 5 |
| <i>circZBED3-AS1</i> | miR-770-5p                   | 5 |
| <i>circZBED3-AS1</i> | miR-7843-3p                  | 2 |
| <i>circZBED3-AS1</i> | miR-7844-5p                  | 1 |
| <i>circZBED3-AS1</i> | miR-7847-3p                  | 1 |
| <i>circZBED3-AS1</i> | miR-7850-5p                  | 1 |
| <i>circZBED3-AS1</i> | miR-7851-3p                  | 2 |
| <i>circZBED3-AS1</i> | miR-7855-5p                  | 1 |
| <i>circZBED3-AS1</i> | miR-7976                     | 3 |
| <i>circZBED3-AS1</i> | miR-7978                     | 2 |
| <i>circZBED3-AS1</i> | miR-802                      | 1 |
| <i>circZBED3-AS1</i> | miR-8055                     | 1 |
| <i>circZBED3-AS1</i> | miR-8060                     | 1 |
| <i>circZBED3-AS1</i> | miR-8063                     | 3 |
| <i>circZBED3-AS1</i> | miR-8065                     | 1 |
| <i>circZBED3-AS1</i> | miR-8066                     | 1 |
| <i>circZBED3-AS1</i> | miR-8070                     | 2 |
| <i>circZBED3-AS1</i> | miR-8076                     | 1 |
| <i>circZBED3-AS1</i> | miR-8077                     | 2 |
| <i>circZBED3-AS1</i> | miR-8081                     | 1 |
| <i>circZBED3-AS1</i> | miR-8084                     | 1 |
| <i>circZBED3-AS1</i> | miR-873-5p.1                 | 1 |
| <i>circZBED3-AS1</i> | miR-874-3p                   | 3 |
| <i>circZBED3-AS1</i> | miR-877-3p                   | 3 |
| <i>circZBED3-AS1</i> | miR-885-5p                   | 1 |
| <i>circZBED3-AS1</i> | miR-888-5p                   | 2 |
| <i>circZBED3-AS1</i> | miR-891b                     | 1 |
| <i>circZBED3-AS1</i> | miR-892-5p                   | 1 |
| <i>circZBED3-AS1</i> | miR-892b                     | 1 |
| <i>circZBED3-AS1</i> | miR-9-3p                     | 1 |
| <i>circZBED3-AS1</i> | miR-9-5p                     | 2 |
| <i>circZBED3-AS1</i> | miR-920/4300/5591-5p/6726-5p | 1 |

|                      |                    |    |
|----------------------|--------------------|----|
| <i>circZBED3-AS1</i> | miR-92a-2-5p       | 3  |
| <i>circZBED3-AS1</i> | miR-93-3p          | 1  |
| <i>circZBED3-AS1</i> | miR-937-5p         | 1  |
| <i>circZBED3-AS1</i> | miR-939-3p         | 2  |
| <i>circZBED3-AS1</i> | miR-939-5p/1343-5p | 2  |
| <i>circZBED3-AS1</i> | miR-942-5p         | 1  |
| <i>circZBED3-AS1</i> | miR-95-5p          | 1  |
| <i>circZBED3-AS1</i> | miR-9500           | 1  |
| <i>circZBED3-AS1</i> | miR-96-5p/1271-5p  | 1  |
| <i>circZBED3-AS1</i> | miR-99-3p          | 2  |
| <i>circZC3H6</i>     | miR-103a-2-5p      | 4  |
| <i>circZC3H6</i>     | miR-10a-3p         | 1  |
| <i>circZC3H6</i>     | miR-1229-3p        | 4  |
| <i>circZC3H6</i>     | miR-1249-3p        | 1  |
| <i>circZC3H6</i>     | miR-1290           | 2  |
| <i>circZC3H6</i>     | miR-1298-5p        | 3  |
| <i>circZC3H6</i>     | miR-1304-3p        | 2  |
| <i>circZC3H6</i>     | miR-130b-5p        | 11 |
| <i>circZC3H6</i>     | miR-135b-3p        | 3  |
| <i>circZC3H6</i>     | miR-138-2-3p       | 5  |
| <i>circZC3H6</i>     | miR-197-3p         | 5  |
| <i>circZC3H6</i>     | miR-205-3p         | 6  |
| <i>circZC3H6</i>     | miR-20a-3p         | 5  |
| <i>circZC3H6</i>     | miR-20b-3p         | 6  |
| <i>circZC3H6</i>     | miR-223-5p         | 6  |
| <i>circZC3H6</i>     | miR-29a-5p         | 6  |
| <i>circZC3H6</i>     | miR-3119           | 4  |
| <i>circZC3H6</i>     | miR-3137           | 6  |
| <i>circZC3H6</i>     | miR-3140-3p        | 4  |
| <i>circZC3H6</i>     | miR-3149           | 3  |
| <i>circZC3H6</i>     | miR-3160-5p        | 5  |
| <i>circZC3H6</i>     | miR-3193           | 4  |
| <i>circZC3H6</i>     | miR-335-3p         | 4  |
| <i>circZC3H6</i>     | miR-3671           | 5  |
| <i>circZC3H6</i>     | miR-3686           | 7  |
| <i>circZC3H6</i>     | miR-3977           | 4  |
| <i>circZC3H6</i>     | miR-4263           | 3  |
| <i>circZC3H6</i>     | miR-4279           | 6  |

|                  |                       |    |
|------------------|-----------------------|----|
| <i>circZC3H6</i> | miR-4307              | 5  |
| <i>circZC3H6</i> | miR-4652-3p           | 7  |
| <i>circZC3H6</i> | miR-4659a-3p/4659b-3p | 12 |
| <i>circZC3H6</i> | miR-4735-5p           | 5  |
| <i>circZC3H6</i> | miR-4743-3p           | 7  |
| <i>circZC3H6</i> | miR-4753-3p           | 9  |
| <i>circZC3H6</i> | miR-4762-5p           | 3  |
| <i>circZC3H6</i> | miR-4768-5p/6833-3p   | 13 |
| <i>circZC3H6</i> | miR-4778-3p           | 6  |
| <i>circZC3H6</i> | miR-4796-5p           | 2  |
| <i>circZC3H6</i> | miR-5003-3p           | 11 |
| <i>circZC3H6</i> | miR-5004-3p           | 5  |
| <i>circZC3H6</i> | miR-500a-5p           | 3  |
| <i>circZC3H6</i> | miR-5096              | 4  |
| <i>circZC3H6</i> | miR-526b-5p           | 5  |
| <i>circZC3H6</i> | miR-544a              | 2  |
| <i>circZC3H6</i> | miR-576-5p            | 3  |
| <i>circZC3H6</i> | miR-578               | 5  |
| <i>circZC3H6</i> | miR-605-5p            | 3  |
| <i>circZC3H6</i> | miR-607               | 5  |
| <i>circZC3H6</i> | miR-6071              | 2  |
| <i>circZC3H6</i> | miR-627-3p            | 11 |
| <i>circZC3H6</i> | miR-629-3p            | 7  |
| <i>circZC3H6</i> | miR-643               | 4  |
| <i>circZC3H6</i> | miR-6726-3p           | 1  |
| <i>circZC3H6</i> | miR-6738-3p           | 2  |
| <i>circZC3H6</i> | miR-676-5p            | 8  |
| <i>circZC3H6</i> | miR-6806-5p           | 2  |
| <i>circZC3H6</i> | miR-6809-3p           | 13 |
| <i>circZC3H6</i> | miR-6817-3p           | 9  |
| <i>circZC3H6</i> | miR-6828-3p           | 2  |
| <i>circZC3H6</i> | miR-6873-3p           | 10 |
| <i>circZC3H6</i> | miR-6875-3p           | 12 |
| <i>circZC3H6</i> | miR-6885-3p           | 7  |
| <i>circZC3H6</i> | miR-6886-3p           | 2  |
| <i>circZC3H6</i> | miR-7110-3p           | 9  |
| <i>circZC3H6</i> | miR-7850-5p           | 6  |
| <i>circZC3H6</i> | miR-876-5p            | 2  |

|                  |                     |    |
|------------------|---------------------|----|
| <i>circZC3H6</i> | miR-938             | 2  |
| <i>circZC3H6</i> | miR-942-5p          | 13 |
| <i>circZC3H6</i> | miR-1-3p/206        | 1  |
| <i>circZC3H6</i> | miR-1183            | 4  |
| <i>circZC3H6</i> | miR-1200            | 6  |
| <i>circZC3H6</i> | miR-1207-3p         | 5  |
| <i>circZC3H6</i> | miR-1208            | 4  |
| <i>circZC3H6</i> | miR-1237-3p         | 3  |
| <i>circZC3H6</i> | miR-1238-3p         | 4  |
| <i>circZC3H6</i> | miR-1247-3p         | 3  |
| <i>circZC3H6</i> | miR-1248            | 3  |
| <i>circZC3H6</i> | miR-1252-3p         | 1  |
| <i>circZC3H6</i> | miR-1272            | 4  |
| <i>circZC3H6</i> | miR-1279            | 1  |
| <i>circZC3H6</i> | miR-1282            | 4  |
| <i>circZC3H6</i> | miR-1284            | 1  |
| <i>circZC3H6</i> | miR-129-5p          | 7  |
| <i>circZC3H6</i> | miR-1291/6775-3p    | 2  |
| <i>circZC3H6</i> | miR-1292-5p         | 3  |
| <i>circZC3H6</i> | miR-1295a           | 2  |
| <i>circZC3H6</i> | miR-1304-5p         | 4  |
| <i>circZC3H6</i> | miR-1322            | 4  |
| <i>circZC3H6</i> | miR-141-5p          | 5  |
| <i>circZC3H6</i> | miR-145-3p          | 6  |
| <i>circZC3H6</i> | miR-1468-3p         | 2  |
| <i>circZC3H6</i> | miR-148b-5p/6874-3p | 6  |
| <i>circZC3H6</i> | miR-152-5p          | 4  |
| <i>circZC3H6</i> | miR-1537-5p         | 2  |
| <i>circZC3H6</i> | miR-154-3p/487-3p   | 1  |
| <i>circZC3H6</i> | miR-15b-3p          | 1  |
| <i>circZC3H6</i> | miR-16-2-3p/195-3p  | 3  |
| <i>circZC3H6</i> | miR-181-3p/4420     | 2  |
| <i>circZC3H6</i> | miR-182-3p          | 3  |
| <i>circZC3H6</i> | miR-182-5p          | 2  |
| <i>circZC3H6</i> | miR-185-3p          | 4  |
| <i>circZC3H6</i> | miR-186-3p          | 1  |
| <i>circZC3H6</i> | miR-188-5p          | 2  |
| <i>circZC3H6</i> | miR-1915-5p         | 2  |

|                  |              |   |
|------------------|--------------|---|
| <i>circZC3H6</i> | miR-203b-3p  | 2 |
| <i>circZC3H6</i> | miR-2110     | 2 |
| <i>circZC3H6</i> | miR-2115-5p  | 4 |
| <i>circZC3H6</i> | miR-2116-5p  | 9 |
| <i>circZC3H6</i> | miR-214-5p   | 4 |
| <i>circZC3H6</i> | miR-218-1-3p | 3 |
| <i>circZC3H6</i> | miR-218-2-3p | 3 |
| <i>circZC3H6</i> | miR-22-5p    | 9 |
| <i>circZC3H6</i> | miR-224-5p   | 3 |
| <i>circZC3H6</i> | miR-2276-5p  | 1 |
| <i>circZC3H6</i> | miR-26b-3p   | 2 |
| <i>circZC3H6</i> | miR-28-3p    | 2 |
| <i>circZC3H6</i> | miR-297      | 1 |
| <i>circZC3H6</i> | miR-30-3p    | 3 |
| <i>circZC3H6</i> | miR-3064-5p  | 2 |
| <i>circZC3H6</i> | miR-3074-5p  | 6 |
| <i>circZC3H6</i> | miR-31-5p    | 2 |
| <i>circZC3H6</i> | miR-3115     | 1 |
| <i>circZC3H6</i> | miR-3150a-3p | 2 |
| <i>circZC3H6</i> | miR-3152-5p  | 2 |
| <i>circZC3H6</i> | miR-3168     | 6 |
| <i>circZC3H6</i> | miR-3191-5p  | 6 |
| <i>circZC3H6</i> | miR-3200-3p  | 2 |
| <i>circZC3H6</i> | miR-3200-5p  | 2 |
| <i>circZC3H6</i> | miR-323-3p   | 5 |
| <i>circZC3H6</i> | miR-329-5p   | 4 |
| <i>circZC3H6</i> | miR-330-3p.2 | 1 |
| <i>circZC3H6</i> | miR-339-5p   | 1 |
| <i>circZC3H6</i> | miR-34b-3p   | 4 |
| <i>circZC3H6</i> | miR-34c-3p   | 4 |
| <i>circZC3H6</i> | miR-361-3p   | 2 |
| <i>circZC3H6</i> | miR-3646     | 1 |
| <i>circZC3H6</i> | miR-3662     | 3 |
| <i>circZC3H6</i> | miR-3668     | 1 |
| <i>circZC3H6</i> | miR-3675-5p  | 1 |
| <i>circZC3H6</i> | miR-3679-3p  | 2 |
| <i>circZC3H6</i> | miR-3688-3p  | 4 |
| <i>circZC3H6</i> | miR-375      | 7 |



|                  |                           |   |
|------------------|---------------------------|---|
| <i>circZC3H6</i> | miR-377-5p/6086           | 4 |
| <i>circZC3H6</i> | miR-378a-5p               | 6 |
| <i>circZC3H6</i> | miR-380-3p                | 1 |
| <i>circZC3H6</i> | miR-382-5p                | 3 |
| <i>circZC3H6</i> | miR-3907                  | 2 |
| <i>circZC3H6</i> | miR-3908                  | 2 |
| <i>circZC3H6</i> | miR-3912-5p               | 5 |
| <i>circZC3H6</i> | miR-3920                  | 4 |
| <i>circZC3H6</i> | miR-3922-5p               | 1 |
| <i>circZC3H6</i> | miR-3924                  | 2 |
| <i>circZC3H6</i> | miR-3929/4419b/4478       | 2 |
| <i>circZC3H6</i> | miR-3942-5p               | 2 |
| <i>circZC3H6</i> | miR-3973                  | 3 |
| <i>circZC3H6</i> | miR-409-3p                | 2 |
| <i>circZC3H6</i> | miR-411-3p                | 1 |
| <i>circZC3H6</i> | miR-421                   | 2 |
| <i>circZC3H6</i> | miR-4271/4725-3p/6780b-5p | 1 |
| <i>circZC3H6</i> | miR-4277                  | 4 |
| <i>circZC3H6</i> | miR-4286                  | 3 |
| <i>circZC3H6</i> | miR-4290                  | 1 |
| <i>circZC3H6</i> | miR-4327                  | 1 |
| <i>circZC3H6</i> | miR-4422                  | 1 |
| <i>circZC3H6</i> | miR-4427                  | 1 |
| <i>circZC3H6</i> | miR-4453/4538             | 2 |
| <i>circZC3H6</i> | miR-4464/4748             | 3 |
| <i>circZC3H6</i> | miR-4470                  | 2 |
| <i>circZC3H6</i> | miR-4471/8059             | 3 |
| <i>circZC3H6</i> | miR-4509                  | 1 |
| <i>circZC3H6</i> | miR-4539                  | 3 |
| <i>circZC3H6</i> | miR-4540                  | 2 |
| <i>circZC3H6</i> | miR-4635                  | 3 |
| <i>circZC3H6</i> | miR-4643                  | 2 |
| <i>circZC3H6</i> | miR-4663                  | 3 |
| <i>circZC3H6</i> | miR-4668-3p               | 5 |
| <i>circZC3H6</i> | miR-4670-3p               | 2 |
| <i>circZC3H6</i> | miR-4671-5p               | 1 |
| <i>circZC3H6</i> | miR-4680-3p               | 1 |
| <i>circZC3H6</i> | miR-4680-5p               | 3 |

|                  |                             |   |
|------------------|-----------------------------|---|
| <i>circZC3H6</i> | miR-4682                    | 4 |
| <i>circZC3H6</i> | miR-4687-3p                 | 2 |
| <i>circZC3H6</i> | miR-4694-3p                 | 1 |
| <i>circZC3H6</i> | miR-4698                    | 3 |
| <i>circZC3H6</i> | miR-4718                    | 2 |
| <i>circZC3H6</i> | miR-4724-3p                 | 2 |
| <i>circZC3H6</i> | miR-4724-5p                 | 4 |
| <i>circZC3H6</i> | miR-4725-5p                 | 2 |
| <i>circZC3H6</i> | miR-4742-3p                 | 6 |
| <i>circZC3H6</i> | miR-4744                    | 1 |
| <i>circZC3H6</i> | miR-4747-3p                 | 2 |
| <i>circZC3H6</i> | miR-4750-3p                 | 1 |
| <i>circZC3H6</i> | miR-4764-3p                 | 2 |
| <i>circZC3H6</i> | miR-4766-5p                 | 5 |
| <i>circZC3H6</i> | miR-4774-3p                 | 2 |
| <i>circZC3H6</i> | miR-4781-3p                 | 2 |
| <i>circZC3H6</i> | miR-4789-3p                 | 2 |
| <i>circZC3H6</i> | miR-483-3p.1                | 3 |
| <i>circZC3H6</i> | miR-486-5p                  | 2 |
| <i>circZC3H6</i> | miR-488-3p                  | 2 |
| <i>circZC3H6</i> | miR-491-3p                  | 6 |
| <i>circZC3H6</i> | miR-495-5p                  | 3 |
| <i>circZC3H6</i> | miR-4999-5p                 | 2 |
| <i>circZC3H6</i> | miR-5007-3p                 | 1 |
| <i>circZC3H6</i> | miR-5009-3p                 | 2 |
| <i>circZC3H6</i> | miR-5011-5p                 | 1 |
| <i>circZC3H6</i> | miR-505-3p.2                | 2 |
| <i>circZC3H6</i> | miR-505-5p                  | 1 |
| <i>circZC3H6</i> | miR-5088-3p                 | 3 |
| <i>circZC3H6</i> | miR-509-3p                  | 1 |
| <i>circZC3H6</i> | miR-510-3p                  | 2 |
| <i>circZC3H6</i> | miR-513a-3p/513c-3p/3606-3p | 8 |
| <i>circZC3H6</i> | miR-513b-3p                 | 3 |
| <i>circZC3H6</i> | miR-516a-3p/516b-3p/7162-5p | 4 |
| <i>circZC3H6</i> | miR-5187-3p                 | 1 |
| <i>circZC3H6</i> | miR-520g-3p                 | 3 |
| <i>circZC3H6</i> | miR-522-3p                  | 1 |
| <i>circZC3H6</i> | miR-543                     | 4 |

|                  |                                               |   |
|------------------|-----------------------------------------------|---|
| <i>circZC3H6</i> | miR-545-3p                                    | 2 |
| <i>circZC3H6</i> | miR-548aj-5p/548f-5p/548g-5p/548x-5p          | 2 |
| <i>circZC3H6</i> | miR-548at-5p                                  | 5 |
| <i>circZC3H6</i> | miR-548az-3p/548ar-3p/548a-3p/548e-3p/548f-3p | 3 |
| <i>circZC3H6</i> | miR-552-5p                                    | 2 |
| <i>circZC3H6</i> | miR-5579-3p                                   | 2 |
| <i>circZC3H6</i> | miR-5582-3p                                   | 3 |
| <i>circZC3H6</i> | miR-5584-3p                                   | 6 |
| <i>circZC3H6</i> | miR-561-3p                                    | 5 |
| <i>circZC3H6</i> | miR-561-5p                                    | 1 |
| <i>circZC3H6</i> | miR-567                                       | 1 |
| <i>circZC3H6</i> | miR-570-3p                                    | 2 |
| <i>circZC3H6</i> | miR-5701                                      | 1 |
| <i>circZC3H6</i> | miR-5704                                      | 2 |
| <i>circZC3H6</i> | miR-5707                                      | 4 |
| <i>circZC3H6</i> | miR-580-5p                                    | 1 |
| <i>circZC3H6</i> | miR-590-3p                                    | 9 |
| <i>circZC3H6</i> | miR-597-3p                                    | 4 |
| <i>circZC3H6</i> | miR-6074                                      | 1 |
| <i>circZC3H6</i> | miR-618                                       | 4 |
| <i>circZC3H6</i> | miR-628-5p                                    | 4 |
| <i>circZC3H6</i> | miR-6505-5p                                   | 3 |
| <i>circZC3H6</i> | miR-6507-3p                                   | 3 |
| <i>circZC3H6</i> | miR-6514-3p                                   | 1 |
| <i>circZC3H6</i> | miR-653-3p                                    | 2 |
| <i>circZC3H6</i> | miR-655-5p                                    | 4 |
| <i>circZC3H6</i> | miR-659-3p                                    | 4 |
| <i>circZC3H6</i> | miR-662                                       | 5 |
| <i>circZC3H6</i> | miR-670-3p                                    | 4 |
| <i>circZC3H6</i> | miR-670-5p                                    | 6 |
| <i>circZC3H6</i> | miR-6716-3p                                   | 1 |
| <i>circZC3H6</i> | miR-6716-5p                                   | 1 |
| <i>circZC3H6</i> | miR-6723-5p                                   | 2 |
| <i>circZC3H6</i> | miR-675-3p                                    | 1 |
| <i>circZC3H6</i> | miR-6755-3p                                   | 4 |
| <i>circZC3H6</i> | miR-6760-3p                                   | 4 |
| <i>circZC3H6</i> | miR-6780a-3p                                  | 3 |
| <i>circZC3H6</i> | miR-6800-5p                                   | 2 |

|                  |                                       |   |
|------------------|---------------------------------------|---|
| <i>circZC3H6</i> | miR-6802-5p                           | 2 |
| <i>circZC3H6</i> | miR-6809-5p                           | 2 |
| <i>circZC3H6</i> | miR-6810-5p                           | 2 |
| <i>circZC3H6</i> | miR-6811-3p                           | 4 |
| <i>circZC3H6</i> | miR-6813-3p                           | 2 |
| <i>circZC3H6</i> | miR-6825-3p                           | 1 |
| <i>circZC3H6</i> | miR-6827-5p                           | 6 |
| <i>circZC3H6</i> | miR-6832-3p                           | 3 |
| <i>circZC3H6</i> | miR-6834-3p                           | 4 |
| <i>circZC3H6</i> | miR-6841-3p                           | 2 |
| <i>circZC3H6</i> | miR-6844                              | 6 |
| <i>circZC3H6</i> | miR-6851-3p                           | 2 |
| <i>circZC3H6</i> | miR-6857-5p                           | 2 |
| <i>circZC3H6</i> | miR-6869-5p                           | 2 |
| <i>circZC3H6</i> | miR-6870-3p                           | 1 |
| <i>circZC3H6</i> | miR-6871-5p                           | 3 |
| <i>circZC3H6</i> | miR-6881-3p                           | 3 |
| <i>circZC3H6</i> | miR-6890-5p                           | 1 |
| <i>circZC3H6</i> | miR-6892-3p                           | 1 |
| <i>circZC3H6</i> | miR-6894-3p                           | 1 |
| <i>circZC3H6</i> | miR-7111-3p                           | 3 |
| <i>circZC3H6</i> | miR-7152-5p                           | 6 |
| <i>circZC3H6</i> | miR-7158-3p                           | 2 |
| <i>circZC3H6</i> | miR-7159-5p                           | 2 |
| <i>circZC3H6</i> | miR-7160-5p                           | 3 |
| <i>circZC3H6</i> | miR-7852-3p                           | 1 |
| <i>circZC3H6</i> | miR-7974                              | 2 |
| <i>circZC3H6</i> | miR-8055                              | 4 |
| <i>circZC3H6</i> | miR-8063                              | 3 |
| <i>circZC3H6</i> | miR-8075                              | 3 |
| <i>circZC3H6</i> | miR-8077                              | 3 |
| <i>circZC3H6</i> | miR-9-3p                              | 1 |
| <i>circZC3H6</i> | miR-935                               | 2 |
| <i>circZC3H6</i> | miR-944                               | 3 |
| <i>circZC3H6</i> | miR-96-5p/1271-5p                     | 2 |
| <i>circZC3H6</i> | let-7a-3p/let-7b-3p/let-7f-1-3p/98-3p | 1 |
| <i>circZC3H6</i> | let-7f-2-3p/1185-3p                   | 1 |
| <i>circZC3H6</i> | miR-1199-5p/6751-3p                   | 1 |

|                  |                     |   |
|------------------|---------------------|---|
| <i>circZC3H6</i> | miR-122-3p          | 1 |
| <i>circZC3H6</i> | miR-124-5p          | 1 |
| <i>circZC3H6</i> | miR-1250-3p         | 5 |
| <i>circZC3H6</i> | miR-1253            | 3 |
| <i>circZC3H6</i> | miR-1263            | 3 |
| <i>circZC3H6</i> | miR-1273g-3p        | 1 |
| <i>circZC3H6</i> | miR-1273h-3p        | 2 |
| <i>circZC3H6</i> | miR-1288-5p         | 2 |
| <i>circZC3H6</i> | miR-1305            | 3 |
| <i>circZC3H6</i> | miR-133a-5p         | 4 |
| <i>circZC3H6</i> | miR-138-5p          | 4 |
| <i>circZC3H6</i> | miR-143-5p          | 2 |
| <i>circZC3H6</i> | miR-1470            | 1 |
| <i>circZC3H6</i> | miR-147a            | 1 |
| <i>circZC3H6</i> | miR-150-3p          | 3 |
| <i>circZC3H6</i> | miR-153-3p          | 3 |
| <i>circZC3H6</i> | miR-153-5p          | 3 |
| <i>circZC3H6</i> | miR-154-5p          | 1 |
| <i>circZC3H6</i> | miR-204-5p/211-5p   | 3 |
| <i>circZC3H6</i> | miR-2113            | 4 |
| <i>circZC3H6</i> | miR-2117            | 3 |
| <i>circZC3H6</i> | miR-218-5p          | 1 |
| <i>circZC3H6</i> | miR-2681-3p         | 4 |
| <i>circZC3H6</i> | miR-299-5p          | 2 |
| <i>circZC3H6</i> | miR-29b-2-5p        | 4 |
| <i>circZC3H6</i> | miR-302c-5p         | 1 |
| <i>circZC3H6</i> | miR-3064-3p         | 1 |
| <i>circZC3H6</i> | miR-3121-5p         | 5 |
| <i>circZC3H6</i> | miR-3123            | 2 |
| <i>circZC3H6</i> | miR-3129-3p/5583-5p | 2 |
| <i>circZC3H6</i> | miR-3151-3p         | 2 |
| <i>circZC3H6</i> | miR-3160-3p         | 2 |
| <i>circZC3H6</i> | miR-3163            | 3 |
| <i>circZC3H6</i> | miR-3180-5p         | 1 |
| <i>circZC3H6</i> | miR-32-3p           | 5 |
| <i>circZC3H6</i> | miR-320             | 2 |
| <i>circZC3H6</i> | miR-337-3p          | 1 |
| <i>circZC3H6</i> | miR-338-5p          | 2 |

|                  |                     |   |
|------------------|---------------------|---|
| <i>circZC3H6</i> | miR-340-5p          | 3 |
| <i>circZC3H6</i> | miR-3607-3p         | 3 |
| <i>circZC3H6</i> | miR-362-5p/500b-5p  | 3 |
| <i>circZC3H6</i> | miR-3664-5p         | 3 |
| <i>circZC3H6</i> | miR-3667-3p         | 2 |
| <i>circZC3H6</i> | miR-3675-3p         | 3 |
| <i>circZC3H6</i> | miR-3678-3p         | 2 |
| <i>circZC3H6</i> | miR-3680-3p         | 6 |
| <i>circZC3H6</i> | miR-3689d/6851-5p   | 3 |
| <i>circZC3H6</i> | miR-3692-3p         | 1 |
| <i>circZC3H6</i> | miR-374-5p/655-3p   | 2 |
| <i>circZC3H6</i> | miR-374b-3p         | 2 |
| <i>circZC3H6</i> | miR-374c-3p         | 1 |
| <i>circZC3H6</i> | miR-382-3p          | 1 |
| <i>circZC3H6</i> | miR-3925-5p         | 2 |
| <i>circZC3H6</i> | miR-410-3p          | 2 |
| <i>circZC3H6</i> | miR-4268            | 2 |
| <i>circZC3H6</i> | miR-4282            | 6 |
| <i>circZC3H6</i> | miR-4287/4685-3p    | 5 |
| <i>circZC3H6</i> | miR-4291            | 1 |
| <i>circZC3H6</i> | miR-4292/6791-5p    | 4 |
| <i>circZC3H6</i> | miR-4303            | 2 |
| <i>circZC3H6</i> | miR-4308            | 4 |
| <i>circZC3H6</i> | miR-4318            | 2 |
| <i>circZC3H6</i> | miR-4324            | 3 |
| <i>circZC3H6</i> | miR-433-3p          | 2 |
| <i>circZC3H6</i> | miR-4426/4647/4662b | 2 |
| <i>circZC3H6</i> | miR-4436b-5p        | 3 |
| <i>circZC3H6</i> | miR-4443            | 4 |
| <i>circZC3H6</i> | miR-4446-5p         | 1 |
| <i>circZC3H6</i> | miR-4448            | 2 |
| <i>circZC3H6</i> | miR-4469            | 5 |
| <i>circZC3H6</i> | miR-4476/6876-5p    | 2 |
| <i>circZC3H6</i> | miR-448             | 3 |
| <i>circZC3H6</i> | miR-4487            | 2 |
| <i>circZC3H6</i> | miR-4490            | 7 |
| <i>circZC3H6</i> | miR-450b-5p         | 6 |
| <i>circZC3H6</i> | miR-4528            | 3 |

|                  |                       |   |
|------------------|-----------------------|---|
| <i>circZC3H6</i> | miR-455-3p.2          | 2 |
| <i>circZC3H6</i> | miR-4659a-5p/4659b-5p | 2 |
| <i>circZC3H6</i> | miR-466               | 1 |
| <i>circZC3H6</i> | miR-4667-3p           | 1 |
| <i>circZC3H6</i> | miR-4691-5p/6792-3p   | 2 |
| <i>circZC3H6</i> | miR-4695-3p           | 5 |
| <i>circZC3H6</i> | miR-4699-3p           | 6 |
| <i>circZC3H6</i> | miR-4711-5p           | 3 |
| <i>circZC3H6</i> | miR-4713-5p           | 4 |
| <i>circZC3H6</i> | miR-4714-5p           | 3 |
| <i>circZC3H6</i> | miR-4729              | 2 |
| <i>circZC3H6</i> | miR-4755-5p/5006-3p   | 3 |
| <i>circZC3H6</i> | miR-4766-3p           | 2 |
| <i>circZC3H6</i> | miR-4774-5p           | 7 |
| <i>circZC3H6</i> | miR-4775              | 4 |
| <i>circZC3H6</i> | miR-4776-3p           | 1 |
| <i>circZC3H6</i> | miR-4777-3p           | 1 |
| <i>circZC3H6</i> | miR-4789-5p           | 1 |
| <i>circZC3H6</i> | miR-4795-3p           | 1 |
| <i>circZC3H6</i> | miR-4803              | 1 |
| <i>circZC3H6</i> | miR-5003-5p           | 1 |
| <i>circZC3H6</i> | miR-501-5p            | 3 |
| <i>circZC3H6</i> | miR-5010-3p           | 4 |
| <i>circZC3H6</i> | miR-502-5p            | 3 |
| <i>circZC3H6</i> | miR-507/557           | 6 |
| <i>circZC3H6</i> | miR-513b-5p           | 2 |
| <i>circZC3H6</i> | miR-514a-5p           | 3 |
| <i>circZC3H6</i> | miR-515-5p/519e-5p    | 5 |
| <i>circZC3H6</i> | miR-5193              | 1 |
| <i>circZC3H6</i> | miR-519d-5p           | 3 |
| <i>circZC3H6</i> | miR-520g-5p           | 1 |
| <i>circZC3H6</i> | miR-544b              | 3 |
| <i>circZC3H6</i> | miR-548ao-5p/548ax    | 3 |
| <i>circZC3H6</i> | miR-548e-5p           | 1 |
| <i>circZC3H6</i> | miR-548p              | 1 |
| <i>circZC3H6</i> | miR-551b-5p           | 3 |
| <i>circZC3H6</i> | miR-5571-5p           | 2 |
| <i>circZC3H6</i> | miR-558               | 2 |

|                  |              |   |
|------------------|--------------|---|
| <i>circZC3H6</i> | miR-5585-5p  | 3 |
| <i>circZC3H6</i> | miR-5590-5p  | 2 |
| <i>circZC3H6</i> | miR-5683     | 1 |
| <i>circZC3H6</i> | miR-5692a    | 3 |
| <i>circZC3H6</i> | miR-5695     | 3 |
| <i>circZC3H6</i> | miR-5696     | 3 |
| <i>circZC3H6</i> | miR-5700     | 2 |
| <i>circZC3H6</i> | miR-5702     | 1 |
| <i>circZC3H6</i> | miR-579-3p   | 3 |
| <i>circZC3H6</i> | miR-584-3p   | 1 |
| <i>circZC3H6</i> | miR-586      | 3 |
| <i>circZC3H6</i> | miR-587      | 3 |
| <i>circZC3H6</i> | miR-592      | 3 |
| <i>circZC3H6</i> | miR-599      | 3 |
| <i>circZC3H6</i> | miR-6131     | 4 |
| <i>circZC3H6</i> | miR-623      | 3 |
| <i>circZC3H6</i> | miR-624-5p   | 1 |
| <i>circZC3H6</i> | miR-627-5p   | 3 |
| <i>circZC3H6</i> | miR-6509-3p  | 3 |
| <i>circZC3H6</i> | miR-6515-5p  | 4 |
| <i>circZC3H6</i> | miR-6516-5p  | 3 |
| <i>circZC3H6</i> | miR-660-3p   | 1 |
| <i>circZC3H6</i> | miR-6715b-3p | 2 |
| <i>circZC3H6</i> | miR-6728-3p  | 2 |
| <i>circZC3H6</i> | miR-6734-3p  | 2 |
| <i>circZC3H6</i> | miR-6749-3p  | 2 |
| <i>circZC3H6</i> | miR-6757-3p  | 5 |
| <i>circZC3H6</i> | miR-6758-3p  | 1 |
| <i>circZC3H6</i> | miR-6770-5p  | 3 |
| <i>circZC3H6</i> | miR-6788-3p  | 1 |
| <i>circZC3H6</i> | miR-6795-3p  | 3 |
| <i>circZC3H6</i> | miR-6796-3p  | 1 |
| <i>circZC3H6</i> | miR-6800-3p  | 1 |
| <i>circZC3H6</i> | miR-6818-5p  | 1 |
| <i>circZC3H6</i> | miR-6826-3p  | 1 |
| <i>circZC3H6</i> | miR-6845-3p  | 2 |
| <i>circZC3H6</i> | miR-6867-3p  | 4 |
| <i>circZC3H6</i> | miR-6884-3p  | 3 |



|                  |                          |   |
|------------------|--------------------------|---|
| <i>circZC3H6</i> | miR-6887-3p              | 3 |
| <i>circZC3H6</i> | miR-7112-3p              | 3 |
| <i>circZC3H6</i> | miR-7113-3p              | 5 |
| <i>circZC3H6</i> | miR-7154-5p              | 2 |
| <i>circZC3H6</i> | miR-7161-3p              | 2 |
| <i>circZC3H6</i> | miR-7641                 | 3 |
| <i>circZC3H6</i> | miR-7849-3p              | 2 |
| <i>circZC3H6</i> | miR-873-5p.1             | 1 |
| <i>circZC3H6</i> | miR-875-5p               | 1 |
| <i>circZC3H6</i> | miR-885-5p               | 1 |
| <i>circZC3H6</i> | miR-892a                 | 2 |
| <i>circZC3H6</i> | miR-9-5p                 | 3 |
| <i>circZC3H6</i> | miR-937-5p               | 3 |
| <i>circZC3H6</i> | miR-96-3p                | 4 |
| <i>circZC3H6</i> | miR-99-3p                | 1 |
| <i>circZC3H6</i> | miR-1-5p                 | 1 |
| <i>circZC3H6</i> | miR-101-3p.1             | 1 |
| <i>circZC3H6</i> | miR-101-3p.2             | 2 |
| <i>circZC3H6</i> | miR-101-5p               | 2 |
| <i>circZC3H6</i> | miR-1180-5p              | 2 |
| <i>circZC3H6</i> | miR-1184                 | 1 |
| <i>circZC3H6</i> | miR-1205                 | 1 |
| <i>circZC3H6</i> | miR-122-5p               | 2 |
| <i>circZC3H6</i> | miR-1224-3p              | 1 |
| <i>circZC3H6</i> | miR-1224-5p              | 2 |
| <i>circZC3H6</i> | miR-1225-5p              | 2 |
| <i>circZC3H6</i> | miR-1226-3p              | 2 |
| <i>circZC3H6</i> | miR-1226-5p              | 3 |
| <i>circZC3H6</i> | miR-1229-5p              | 2 |
| <i>circZC3H6</i> | miR-1231                 | 2 |
| <i>circZC3H6</i> | miR-1245a/8079           | 1 |
| <i>circZC3H6</i> | miR-1245b-5p             | 1 |
| <i>circZC3H6</i> | miR-1249-5p/6797-5p      | 1 |
| <i>circZC3H6</i> | miR-125-5p               | 3 |
| <i>circZC3H6</i> | miR-1254/3116            | 3 |
| <i>circZC3H6</i> | miR-1258                 | 2 |
| <i>circZC3H6</i> | miR-125a-3p              | 3 |
| <i>circZC3H6</i> | miR-1262/4701-3p/6736-5p | 4 |

|                  |                                    |   |
|------------------|------------------------------------|---|
| <i>circZC3H6</i> | miR-1264                           | 4 |
| <i>circZC3H6</i> | miR-1269                           | 4 |
| <i>circZC3H6</i> | miR-1270                           | 1 |
| <i>circZC3H6</i> | miR-1273e                          | 1 |
| <i>circZC3H6</i> | miR-1273f                          | 1 |
| <i>circZC3H6</i> | miR-1273g-5p                       | 1 |
| <i>circZC3H6</i> | miR-1276                           | 2 |
| <i>circZC3H6</i> | miR-128-3p                         | 1 |
| <i>circZC3H6</i> | miR-1283                           | 1 |
| <i>circZC3H6</i> | miR-1288-3p                        | 3 |
| <i>circZC3H6</i> | miR-1293/4483                      | 1 |
| <i>circZC3H6</i> | miR-1294                           | 3 |
| <i>circZC3H6</i> | miR-1295b-5p/1912                  | 1 |
| <i>circZC3H6</i> | miR-1299                           | 1 |
| <i>circZC3H6</i> | miR-132-3p/212-3p                  | 1 |
| <i>circZC3H6</i> | miR-133a-3p.1                      | 1 |
| <i>circZC3H6</i> | miR-1343-3p                        | 6 |
| <i>circZC3H6</i> | miR-140-3p.1                       | 1 |
| <i>circZC3H6</i> | miR-140-5p                         | 1 |
| <i>circZC3H6</i> | miR-141-3p/200-3p                  | 1 |
| <i>circZC3H6</i> | miR-143-3p                         | 1 |
| <i>circZC3H6</i> | miR-144-3p                         | 1 |
| <i>circZC3H6</i> | miR-146-5p                         | 1 |
| <i>circZC3H6</i> | miR-148a-5p                        | 2 |
| <i>circZC3H6</i> | miR-149-3p/4728-5p/6785-5p/6883-5p | 1 |
| <i>circZC3H6</i> | miR-150-5p                         | 5 |
| <i>circZC3H6</i> | miR-1587/3620-5p                   | 1 |
| <i>circZC3H6</i> | miR-15a-3p                         | 1 |
| <i>circZC3H6</i> | miR-16-1-3p                        | 2 |
| <i>circZC3H6</i> | miR-17-3p                          | 1 |
| <i>circZC3H6</i> | miR-18-5p                          | 1 |
| <i>circZC3H6</i> | miR-1827                           | 3 |
| <i>circZC3H6</i> | miR-183-5p.2                       | 1 |
| <i>circZC3H6</i> | miR-18b-3p                         | 1 |
| <i>circZC3H6</i> | miR-19-5p                          | 4 |
| <i>circZC3H6</i> | miR-190-5p                         | 1 |
| <i>circZC3H6</i> | miR-1909-3p/6722-3p                | 2 |
| <i>circZC3H6</i> | miR-1910-3p/6511a-5p               | 2 |

|                  |                       |   |
|------------------|-----------------------|---|
| <i>circZC3H6</i> | miR-193b-5p           | 5 |
| <i>circZC3H6</i> | miR-194-5p            | 2 |
| <i>circZC3H6</i> | miR-198               | 2 |
| <i>circZC3H6</i> | miR-199-3p            | 2 |
| <i>circZC3H6</i> | miR-200c-5p/550a-3p   | 1 |
| <i>circZC3H6</i> | miR-202-5p            | 1 |
| <i>circZC3H6</i> | miR-203a-5p           | 1 |
| <i>circZC3H6</i> | miR-203b-5p/6718-5p   | 1 |
| <i>circZC3H6</i> | miR-2052              | 4 |
| <i>circZC3H6</i> | miR-2114-3p           | 2 |
| <i>circZC3H6</i> | miR-2115-3p           | 3 |
| <i>circZC3H6</i> | miR-2116-3p           | 5 |
| <i>circZC3H6</i> | miR-217               | 1 |
| <i>circZC3H6</i> | miR-219b-5p           | 1 |
| <i>circZC3H6</i> | miR-22-3p             | 1 |
| <i>circZC3H6</i> | miR-222-5p            | 3 |
| <i>circZC3H6</i> | miR-23-3p             | 1 |
| <i>circZC3H6</i> | miR-2355-3p           | 2 |
| <i>circZC3H6</i> | miR-2467-3p           | 3 |
| <i>circZC3H6</i> | miR-2467-5p           | 1 |
| <i>circZC3H6</i> | miR-2681-5p           | 1 |
| <i>circZC3H6</i> | miR-27-3p             | 1 |
| <i>circZC3H6</i> | miR-298               | 1 |
| <i>circZC3H6</i> | miR-301a-5p/301b-5p   | 2 |
| <i>circZC3H6</i> | miR-302c-3p.2/520-3p  | 2 |
| <i>circZC3H6</i> | miR-3120-5p           | 2 |
| <i>circZC3H6</i> | miR-3122/3913-5p      | 2 |
| <i>circZC3H6</i> | miR-3125/3916/6859-5p | 1 |
| <i>circZC3H6</i> | miR-3130-3p           | 1 |
| <i>circZC3H6</i> | miR-3130-5p/4482-5p   | 1 |
| <i>circZC3H6</i> | miR-3134              | 1 |
| <i>circZC3H6</i> | miR-3138              | 2 |
| <i>circZC3H6</i> | miR-3140-5p           | 3 |
| <i>circZC3H6</i> | miR-3143              | 2 |
| <i>circZC3H6</i> | miR-3145-5p           | 1 |
| <i>circZC3H6</i> | miR-3147              | 2 |
| <i>circZC3H6</i> | miR-3148              | 3 |
| <i>circZC3H6</i> | miR-3150b-3p          | 2 |

|                  |                          |   |
|------------------|--------------------------|---|
| <i>circZC3H6</i> | miR-3153/6733-5p/6739-5p | 3 |
| <i>circZC3H6</i> | miR-3157-3p              | 1 |
| <i>circZC3H6</i> | miR-3158-5p              | 1 |
| <i>circZC3H6</i> | miR-3165                 | 1 |
| <i>circZC3H6</i> | miR-3169                 | 2 |
| <i>circZC3H6</i> | miR-3175                 | 2 |
| <i>circZC3H6</i> | miR-3184-3p              | 4 |
| <i>circZC3H6</i> | miR-3188                 | 1 |
| <i>circZC3H6</i> | miR-3189-5p              | 1 |
| <i>circZC3H6</i> | miR-3194-3p              | 3 |
| <i>circZC3H6</i> | miR-3199/8052            | 1 |
| <i>circZC3H6</i> | miR-323a-5p              | 4 |
| <i>circZC3H6</i> | miR-326                  | 3 |
| <i>circZC3H6</i> | miR-33-5p                | 1 |
| <i>circZC3H6</i> | miR-331-3p               | 2 |
| <i>circZC3H6</i> | miR-345-3p               | 3 |
| <i>circZC3H6</i> | miR-34b-5p/449c-5p       | 2 |
| <i>circZC3H6</i> | miR-3529-3p              | 1 |
| <i>circZC3H6</i> | miR-3612                 | 3 |
| <i>circZC3H6</i> | miR-3613-3p              | 2 |
| <i>circZC3H6</i> | miR-3616-3p              | 2 |
| <i>circZC3H6</i> | miR-3619-3p              | 1 |
| <i>circZC3H6</i> | miR-3622a-5p             | 1 |
| <i>circZC3H6</i> | miR-363-5p/6745          | 1 |
| <i>circZC3H6</i> | miR-3650                 | 1 |
| <i>circZC3H6</i> | miR-3657                 | 1 |
| <i>circZC3H6</i> | miR-365a-5p/365b-5p      | 1 |
| <i>circZC3H6</i> | miR-3670                 | 1 |
| <i>circZC3H6</i> | miR-3672/6864-3p         | 2 |
| <i>circZC3H6</i> | miR-3684                 | 1 |
| <i>circZC3H6</i> | miR-3685                 | 1 |
| <i>circZC3H6</i> | miR-3688-5p              | 1 |
| <i>circZC3H6</i> | miR-3690                 | 5 |
| <i>circZC3H6</i> | miR-3692-5p              | 3 |
| <i>circZC3H6</i> | miR-378-3p               | 1 |
| <i>circZC3H6</i> | miR-378g                 | 1 |
| <i>circZC3H6</i> | miR-379-5p               | 1 |
| <i>circZC3H6</i> | miR-380-5p/563           | 1 |

|                  |                       |   |
|------------------|-----------------------|---|
| <i>circZC3H6</i> | miR-383-5p.1          | 3 |
| <i>circZC3H6</i> | miR-383-5p.2          | 3 |
| <i>circZC3H6</i> | miR-384               | 1 |
| <i>circZC3H6</i> | miR-3911              | 1 |
| <i>circZC3H6</i> | miR-3915              | 2 |
| <i>circZC3H6</i> | miR-3919              | 1 |
| <i>circZC3H6</i> | miR-3921/4653-5p      | 2 |
| <i>circZC3H6</i> | miR-3925-3p           | 3 |
| <i>circZC3H6</i> | miR-3934-5p           | 3 |
| <i>circZC3H6</i> | miR-3940-5p/4507      | 4 |
| <i>circZC3H6</i> | miR-3943              | 2 |
| <i>circZC3H6</i> | miR-3975              | 1 |
| <i>circZC3H6</i> | miR-3978              | 3 |
| <i>circZC3H6</i> | miR-423-5p            | 2 |
| <i>circZC3H6</i> | miR-4251              | 1 |
| <i>circZC3H6</i> | miR-4254              | 5 |
| <i>circZC3H6</i> | miR-4257              | 2 |
| <i>circZC3H6</i> | miR-4267              | 2 |
| <i>circZC3H6</i> | miR-4269/6715b-5p     | 1 |
| <i>circZC3H6</i> | miR-4270/4441/6754-5p | 2 |
| <i>circZC3H6</i> | miR-4272              | 1 |
| <i>circZC3H6</i> | miR-4273/7156-5p      | 2 |
| <i>circZC3H6</i> | miR-4293              | 2 |
| <i>circZC3H6</i> | miR-4299              | 2 |
| <i>circZC3H6</i> | miR-4301              | 1 |
| <i>circZC3H6</i> | miR-431-5p            | 3 |
| <i>circZC3H6</i> | miR-4311              | 2 |
| <i>circZC3H6</i> | miR-4314              | 2 |
| <i>circZC3H6</i> | miR-4315              | 1 |
| <i>circZC3H6</i> | miR-4316              | 3 |
| <i>circZC3H6</i> | miR-4323              | 2 |
| <i>circZC3H6</i> | miR-4325              | 1 |
| <i>circZC3H6</i> | miR-4326              | 2 |
| <i>circZC3H6</i> | miR-4329              | 1 |
| <i>circZC3H6</i> | miR-4417              | 1 |
| <i>circZC3H6</i> | miR-4421/5699-3p      | 1 |
| <i>circZC3H6</i> | miR-4424              | 2 |
| <i>circZC3H6</i> | miR-4425              | 2 |

|                  |                          |   |
|------------------|--------------------------|---|
| <i>circZC3H6</i> | miR-4433a-3p             | 4 |
| <i>circZC3H6</i> | miR-4433b-3p             | 2 |
| <i>circZC3H6</i> | miR-4433b-5p             | 1 |
| <i>circZC3H6</i> | miR-4434/4516/5703       | 3 |
| <i>circZC3H6</i> | miR-4437                 | 1 |
| <i>circZC3H6</i> | miR-4438                 | 1 |
| <i>circZC3H6</i> | miR-4451                 | 1 |
| <i>circZC3H6</i> | miR-4455                 | 1 |
| <i>circZC3H6</i> | miR-4456                 | 2 |
| <i>circZC3H6</i> | miR-4459                 | 4 |
| <i>circZC3H6</i> | miR-4473                 | 2 |
| <i>circZC3H6</i> | miR-4474-3p              | 1 |
| <i>circZC3H6</i> | miR-4475                 | 1 |
| <i>circZC3H6</i> | miR-4481/4745-5p         | 1 |
| <i>circZC3H6</i> | miR-4486                 | 1 |
| <i>circZC3H6</i> | miR-450a-1-3p            | 2 |
| <i>circZC3H6</i> | miR-4512                 | 1 |
| <i>circZC3H6</i> | miR-4514/4692            | 1 |
| <i>circZC3H6</i> | miR-4515                 | 3 |
| <i>circZC3H6</i> | miR-451b                 | 2 |
| <i>circZC3H6</i> | miR-452-3p               | 3 |
| <i>circZC3H6</i> | miR-4524a-3p             | 1 |
| <i>circZC3H6</i> | miR-4529-5p              | 1 |
| <i>circZC3H6</i> | miR-4531                 | 1 |
| <i>circZC3H6</i> | miR-4534/8082            | 1 |
| <i>circZC3H6</i> | miR-4535                 | 1 |
| <i>circZC3H6</i> | miR-4536-5p              | 2 |
| <i>circZC3H6</i> | miR-4633-5p              | 2 |
| <i>circZC3H6</i> | miR-4638-3p              | 1 |
| <i>circZC3H6</i> | miR-4640-5p              | 1 |
| <i>circZC3H6</i> | miR-4646-3p              | 2 |
| <i>circZC3H6</i> | miR-4650-3p              | 1 |
| <i>circZC3H6</i> | miR-4653-3p              | 1 |
| <i>circZC3H6</i> | miR-4661-3p              | 3 |
| <i>circZC3H6</i> | miR-4666b                | 4 |
| <i>circZC3H6</i> | miR-4667-5p/4700-5p/8089 | 1 |
| <i>circZC3H6</i> | miR-4668-5p              | 3 |
| <i>circZC3H6</i> | miR-4669                 | 1 |

|                  |                     |   |
|------------------|---------------------|---|
| <i>circZC3H6</i> | miR-4671-3p         | 2 |
| <i>circZC3H6</i> | miR-4674            | 1 |
| <i>circZC3H6</i> | miR-4677-5p         | 2 |
| <i>circZC3H6</i> | miR-4685-5p/6837-5p | 2 |
| <i>circZC3H6</i> | miR-4689/6858-5p    | 2 |
| <i>circZC3H6</i> | miR-4693-5p         | 1 |
| <i>circZC3H6</i> | miR-4694-5p         | 1 |
| <i>circZC3H6</i> | miR-4695-5p         | 3 |
| <i>circZC3H6</i> | miR-4700-3p         | 2 |
| <i>circZC3H6</i> | miR-4708-5p         | 1 |
| <i>circZC3H6</i> | miR-4709-5p         | 2 |
| <i>circZC3H6</i> | miR-4710            | 3 |
| <i>circZC3H6</i> | miR-4711-3p         | 1 |
| <i>circZC3H6</i> | miR-4715-3p         | 2 |
| <i>circZC3H6</i> | miR-4717-3p         | 2 |
| <i>circZC3H6</i> | miR-4721            | 2 |
| <i>circZC3H6</i> | miR-4728-3p         | 2 |
| <i>circZC3H6</i> | miR-4731-5p         | 2 |
| <i>circZC3H6</i> | miR-4732-3p         | 3 |
| <i>circZC3H6</i> | miR-4733-3p         | 2 |
| <i>circZC3H6</i> | miR-4733-5p         | 2 |
| <i>circZC3H6</i> | miR-4739            | 1 |
| <i>circZC3H6</i> | miR-4740-5p         | 3 |
| <i>circZC3H6</i> | miR-4742-5p         | 1 |
| <i>circZC3H6</i> | miR-4747-5p/5196-5p | 1 |
| <i>circZC3H6</i> | miR-4751            | 1 |
| <i>circZC3H6</i> | miR-4752            | 5 |
| <i>circZC3H6</i> | miR-4756-3p         | 1 |
| <i>circZC3H6</i> | miR-4758-3p         | 1 |
| <i>circZC3H6</i> | miR-4759            | 2 |
| <i>circZC3H6</i> | miR-4760-3p         | 3 |
| <i>circZC3H6</i> | miR-4760-5p/8061    | 2 |
| <i>circZC3H6</i> | miR-4768-3p         | 4 |
| <i>circZC3H6</i> | miR-4769-3p/6817-5p | 1 |
| <i>circZC3H6</i> | miR-4772-5p         | 3 |
| <i>circZC3H6</i> | miR-4773            | 1 |
| <i>circZC3H6</i> | miR-4776-5p         | 1 |
| <i>circZC3H6</i> | miR-4779            | 3 |

|                  |                             |   |
|------------------|-----------------------------|---|
| <i>circZC3H6</i> | miR-4782-5p/5706            | 1 |
| <i>circZC3H6</i> | miR-4786-3p                 | 2 |
| <i>circZC3H6</i> | miR-4787-3p                 | 1 |
| <i>circZC3H6</i> | miR-4792                    | 3 |
| <i>circZC3H6</i> | miR-4793-3p                 | 1 |
| <i>circZC3H6</i> | miR-4800-5p                 | 2 |
| <i>circZC3H6</i> | miR-4802-3p                 | 1 |
| <i>circZC3H6</i> | miR-483-3p.2                | 2 |
| <i>circZC3H6</i> | miR-485-5p                  | 1 |
| <i>circZC3H6</i> | miR-487-3p                  | 1 |
| <i>circZC3H6</i> | miR-487a-5p/487b-5p         | 2 |
| <i>circZC3H6</i> | miR-490-3p                  | 1 |
| <i>circZC3H6</i> | miR-490-5p                  | 2 |
| <i>circZC3H6</i> | miR-492                     | 2 |
| <i>circZC3H6</i> | miR-5000-3p                 | 3 |
| <i>circZC3H6</i> | miR-5002-3p                 | 1 |
| <i>circZC3H6</i> | miR-5004-5p                 | 1 |
| <i>circZC3H6</i> | miR-5008-3p/6737-3p/7157-3p | 1 |
| <i>circZC3H6</i> | miR-5008-5p                 | 1 |
| <i>circZC3H6</i> | miR-5009-5p/8058            | 4 |
| <i>circZC3H6</i> | miR-500b-3p                 | 1 |
| <i>circZC3H6</i> | miR-5011-3p                 | 4 |
| <i>circZC3H6</i> | miR-508-5p                  | 1 |
| <i>circZC3H6</i> | miR-5087                    | 4 |
| <i>circZC3H6</i> | miR-509-3-5p/509-5p/4418    | 1 |
| <i>circZC3H6</i> | miR-5092                    | 1 |
| <i>circZC3H6</i> | miR-5093                    | 2 |
| <i>circZC3H6</i> | miR-5094                    | 2 |
| <i>circZC3H6</i> | miR-5095/7151-3p            | 1 |
| <i>circZC3H6</i> | miR-511-3p                  | 2 |
| <i>circZC3H6</i> | miR-512-3p                  | 2 |
| <i>circZC3H6</i> | miR-512-5p                  | 2 |
| <i>circZC3H6</i> | miR-513a-5p                 | 1 |
| <i>circZC3H6</i> | miR-516b-5p                 | 1 |
| <i>circZC3H6</i> | miR-518c-5p                 | 3 |
| <i>circZC3H6</i> | miR-5190                    | 1 |
| <i>circZC3H6</i> | miR-5194                    | 2 |
| <i>circZC3H6</i> | miR-5195-5p                 | 1 |



|                  |                                      |   |
|------------------|--------------------------------------|---|
| <i>circZC3H6</i> | miR-520f-5p                          | 1 |
| <i>circZC3H6</i> | miR-524-5p                           | 2 |
| <i>circZC3H6</i> | miR-532-3p                           | 5 |
| <i>circZC3H6</i> | miR-539-5p                           | 1 |
| <i>circZC3H6</i> | miR-548az-5p/548t-5p                 | 2 |
| <i>circZC3H6</i> | miR-548g-3p                          | 2 |
| <i>circZC3H6</i> | miR-548m                             | 3 |
| <i>circZC3H6</i> | miR-548n                             | 2 |
| <i>circZC3H6</i> | miR-548q                             | 2 |
| <i>circZC3H6</i> | miR-5571-3p                          | 1 |
| <i>circZC3H6</i> | miR-5582-5p                          | 1 |
| <i>circZC3H6</i> | miR-5584-5p                          | 1 |
| <i>circZC3H6</i> | miR-5589-3p                          | 1 |
| <i>circZC3H6</i> | miR-5589-5p                          | 2 |
| <i>circZC3H6</i> | miR-568                              | 1 |
| <i>circZC3H6</i> | miR-5680                             | 1 |
| <i>circZC3H6</i> | miR-5687                             | 2 |
| <i>circZC3H6</i> | miR-5691                             | 1 |
| <i>circZC3H6</i> | miR-5694                             | 3 |
| <i>circZC3H6</i> | miR-5699-5p                          | 1 |
| <i>circZC3H6</i> | miR-576-3p                           | 1 |
| <i>circZC3H6</i> | miR-582-5p                           | 2 |
| <i>circZC3H6</i> | miR-583                              | 2 |
| <i>circZC3H6</i> | miR-589-3p                           | 3 |
| <i>circZC3H6</i> | miR-589-5p                           | 1 |
| <i>circZC3H6</i> | miR-596                              | 2 |
| <i>circZC3H6</i> | miR-597-5p                           | 1 |
| <i>circZC3H6</i> | miR-604                              | 2 |
| <i>circZC3H6</i> | miR-6077                             | 2 |
| <i>circZC3H6</i> | miR-6080                             | 1 |
| <i>circZC3H6</i> | miR-6089                             | 1 |
| <i>circZC3H6</i> | miR-609                              | 1 |
| <i>circZC3H6</i> | miR-6090                             | 2 |
| <i>circZC3H6</i> | miR-612/1285-3p/3187-5p/5189-5p/6860 | 1 |
| <i>circZC3H6</i> | miR-6124                             | 3 |
| <i>circZC3H6</i> | miR-6128                             | 3 |
| <i>circZC3H6</i> | miR-6132/6836-5p                     | 2 |
| <i>circZC3H6</i> | miR-6134                             | 1 |

|                  |                     |   |
|------------------|---------------------|---|
| <i>circZC3H6</i> | miR-619-3p          | 2 |
| <i>circZC3H6</i> | miR-625-3p          | 1 |
| <i>circZC3H6</i> | miR-629-5p          | 5 |
| <i>circZC3H6</i> | miR-630             | 2 |
| <i>circZC3H6</i> | miR-631/3661        | 1 |
| <i>circZC3H6</i> | miR-632/4288        | 2 |
| <i>circZC3H6</i> | miR-637             | 1 |
| <i>circZC3H6</i> | miR-644a            | 1 |
| <i>circZC3H6</i> | miR-647             | 2 |
| <i>circZC3H6</i> | miR-649             | 1 |
| <i>circZC3H6</i> | miR-6502-3p         | 1 |
| <i>circZC3H6</i> | miR-6503-3p         | 1 |
| <i>circZC3H6</i> | miR-6508-3p         | 1 |
| <i>circZC3H6</i> | miR-6509-5p         | 3 |
| <i>circZC3H6</i> | miR-6511-5p         | 2 |
| <i>circZC3H6</i> | miR-6513-5p         | 2 |
| <i>circZC3H6</i> | miR-652-5p          | 1 |
| <i>circZC3H6</i> | miR-654-5p          | 1 |
| <i>circZC3H6</i> | miR-659-5p          | 2 |
| <i>circZC3H6</i> | miR-660-5p          | 1 |
| <i>circZC3H6</i> | miR-661             | 3 |
| <i>circZC3H6</i> | miR-664a-3p         | 2 |
| <i>circZC3H6</i> | miR-6720-5p         | 1 |
| <i>circZC3H6</i> | miR-6729-3p         | 1 |
| <i>circZC3H6</i> | miR-6734-5p         | 3 |
| <i>circZC3H6</i> | miR-6735-3p         | 2 |
| <i>circZC3H6</i> | miR-6739-3p         | 2 |
| <i>circZC3H6</i> | miR-6740-3p         | 2 |
| <i>circZC3H6</i> | miR-6740-5p         | 4 |
| <i>circZC3H6</i> | miR-6741-5p         | 4 |
| <i>circZC3H6</i> | miR-6742-3p         | 5 |
| <i>circZC3H6</i> | miR-6748-3p         | 1 |
| <i>circZC3H6</i> | miR-6750-3p         | 1 |
| <i>circZC3H6</i> | miR-6750-5p/6822-5p | 1 |
| <i>circZC3H6</i> | miR-6753-5p         | 4 |
| <i>circZC3H6</i> | miR-6756-5p/6766-5p | 1 |
| <i>circZC3H6</i> | miR-676-3p          | 2 |
| <i>circZC3H6</i> | miR-6760-5p         | 1 |

|                  |                       |   |
|------------------|-----------------------|---|
| <i>circZC3H6</i> | miR-6761-5p           | 1 |
| <i>circZC3H6</i> | miR-6762-3p           | 2 |
| <i>circZC3H6</i> | miR-6764-3p/6824-3p   | 3 |
| <i>circZC3H6</i> | miR-6765-5p           | 2 |
| <i>circZC3H6</i> | miR-6769a-3p          | 2 |
| <i>circZC3H6</i> | miR-6769a-5p/6769b-5p | 1 |
| <i>circZC3H6</i> | miR-6772-3p           | 3 |
| <i>circZC3H6</i> | miR-6772-5p           | 1 |
| <i>circZC3H6</i> | miR-6776-5p           | 6 |
| <i>circZC3H6</i> | miR-6777-3p           | 1 |
| <i>circZC3H6</i> | miR-6782-5p           | 1 |
| <i>circZC3H6</i> | miR-6783-5p           | 1 |
| <i>circZC3H6</i> | miR-6787-3p           | 1 |
| <i>circZC3H6</i> | miR-6798-5p           | 1 |
| <i>circZC3H6</i> | miR-6799-5p           | 1 |
| <i>circZC3H6</i> | miR-6801-3p/6810-3p   | 2 |
| <i>circZC3H6</i> | miR-6804-5p           | 1 |
| <i>circZC3H6</i> | miR-6815-3p           | 3 |
| <i>circZC3H6</i> | miR-6815-5p/6865-5p   | 4 |
| <i>circZC3H6</i> | miR-6818-3p           | 3 |
| <i>circZC3H6</i> | miR-6822-3p           | 1 |
| <i>circZC3H6</i> | miR-6825-5p           | 2 |
| <i>circZC3H6</i> | miR-6833-5p           | 5 |
| <i>circZC3H6</i> | miR-6834-5p           | 3 |
| <i>circZC3H6</i> | miR-6839-3p           | 4 |
| <i>circZC3H6</i> | miR-6842-3p           | 2 |
| <i>circZC3H6</i> | miR-6847-5p           | 2 |
| <i>circZC3H6</i> | miR-6852-5p           | 5 |
| <i>circZC3H6</i> | miR-6861-3p           | 2 |
| <i>circZC3H6</i> | miR-6861-5p           | 6 |
| <i>circZC3H6</i> | miR-6872-3p           | 1 |
| <i>circZC3H6</i> | miR-6873-5p           | 1 |
| <i>circZC3H6</i> | miR-6878-3p           | 1 |
| <i>circZC3H6</i> | miR-6880-3p           | 1 |
| <i>circZC3H6</i> | miR-6880-5p           | 1 |
| <i>circZC3H6</i> | miR-6882-3p           | 1 |
| <i>circZC3H6</i> | miR-6888-3p           | 1 |
| <i>circZC3H6</i> | miR-6889-3p           | 1 |

|                  |             |   |
|------------------|-------------|---|
| <i>circZC3H6</i> | miR-6890-3p | 2 |
| <i>circZC3H6</i> | miR-6894-5p | 1 |
| <i>circZC3H6</i> | miR-6895-5p | 1 |
| <i>circZC3H6</i> | miR-7-3p    | 1 |
| <i>circZC3H6</i> | miR-7-5p    | 2 |
| <i>circZC3H6</i> | miR-7106-5p | 1 |
| <i>circZC3H6</i> | miR-7108-5p | 1 |
| <i>circZC3H6</i> | miR-7109-3p | 3 |
| <i>circZC3H6</i> | miR-7113-5p | 2 |
| <i>circZC3H6</i> | miR-7114-5p | 4 |
| <i>circZC3H6</i> | miR-7150    | 1 |
| <i>circZC3H6</i> | miR-7153-3p | 1 |
| <i>circZC3H6</i> | miR-7154-3p | 1 |
| <i>circZC3H6</i> | miR-7155-5p | 1 |
| <i>circZC3H6</i> | miR-7160-3p | 1 |
| <i>circZC3H6</i> | miR-758-5p  | 1 |
| <i>circZC3H6</i> | miR-759     | 1 |
| <i>circZC3H6</i> | miR-760     | 1 |
| <i>circZC3H6</i> | miR-765     | 1 |
| <i>circZC3H6</i> | miR-766-3p  | 3 |
| <i>circZC3H6</i> | miR-766-5p  | 1 |
| <i>circZC3H6</i> | miR-7703    | 1 |
| <i>circZC3H6</i> | miR-7845-5p | 1 |
| <i>circZC3H6</i> | miR-7851-3p | 2 |
| <i>circZC3H6</i> | miR-7854-3p | 1 |
| <i>circZC3H6</i> | miR-7855-5p | 1 |
| <i>circZC3H6</i> | miR-7975    | 1 |
| <i>circZC3H6</i> | miR-7978    | 2 |
| <i>circZC3H6</i> | miR-8062    | 1 |
| <i>circZC3H6</i> | miR-8068    | 3 |
| <i>circZC3H6</i> | miR-8071    | 1 |
| <i>circZC3H6</i> | miR-8083    | 2 |
| <i>circZC3H6</i> | miR-874-3p  | 1 |
| <i>circZC3H6</i> | miR-875-3p  | 2 |
| <i>circZC3H6</i> | miR-876-3p  | 4 |
| <i>circZC3H6</i> | miR-887-5p  | 2 |
| <i>circZC3H6</i> | miR-890     | 2 |
| <i>circZC3H6</i> | miR-891a-3p | 1 |

|                  |                              |   |
|------------------|------------------------------|---|
| <i>circZC3H6</i> | miR-920/4300/5591-5p/6726-5p | 2 |
| <i>circZC3H6</i> | miR-924                      | 2 |
| <i>circZC3H6</i> | miR-92a-1-5p                 | 2 |
| <i>circZC3H6</i> | miR-92a-2-5p                 | 1 |
| <i>circZC3H6</i> | miR-93-3p                    | 3 |
| <i>circZC3H6</i> | miR-936                      | 2 |
| <i>circZC3H6</i> | miR-939-3p                   | 5 |
| <i>circZC3H6</i> | miR-939-5p/1343-5p           | 2 |
| <i>circZC3H6</i> | miR-940/6808-5p/6893-5p      | 2 |
| <i>circZC3H6</i> | miR-9500                     | 1 |
| <i>circZC3H6</i> | let-7-5p/98-5p               | 1 |
| <i>circZC3H6</i> | miR-1178-5p                  | 2 |
| <i>circZC3H6</i> | miR-1179                     | 2 |
| <i>circZC3H6</i> | miR-1182                     | 2 |
| <i>circZC3H6</i> | miR-1202/3972                | 2 |
| <i>circZC3H6</i> | miR-1227-3p                  | 1 |
| <i>circZC3H6</i> | miR-1227-5p                  | 1 |
| <i>circZC3H6</i> | miR-1233-3p                  | 2 |
| <i>circZC3H6</i> | miR-1236-3p                  | 1 |
| <i>circZC3H6</i> | miR-1236-5p                  | 2 |
| <i>circZC3H6</i> | miR-1237-5p/4488/4697-5p     | 1 |
| <i>circZC3H6</i> | miR-1243                     | 3 |
| <i>circZC3H6</i> | miR-1251-3p                  | 1 |
| <i>circZC3H6</i> | miR-1252-5p                  | 2 |
| <i>circZC3H6</i> | miR-1255a/1255b-5p           | 1 |
| <i>circZC3H6</i> | miR-1255b-2-3p               | 6 |
| <i>circZC3H6</i> | miR-1257                     | 1 |
| <i>circZC3H6</i> | miR-1260a/1260b              | 3 |
| <i>circZC3H6</i> | miR-1265                     | 2 |
| <i>circZC3H6</i> | miR-1267                     | 1 |
| <i>circZC3H6</i> | miR-127-5p                   | 1 |
| <i>circZC3H6</i> | miR-1275/4665-5p             | 1 |
| <i>circZC3H6</i> | miR-1281                     | 1 |
| <i>circZC3H6</i> | miR-1296-3p                  | 2 |
| <i>circZC3H6</i> | miR-1298-3p                  | 1 |
| <i>circZC3H6</i> | miR-1303                     | 1 |
| <i>circZC3H6</i> | miR-134-3p                   | 2 |
| <i>circZC3H6</i> | miR-134-5p                   | 3 |

|                  |                     |   |
|------------------|---------------------|---|
| <i>circZC3H6</i> | miR-135-5p          | 2 |
| <i>circZC3H6</i> | miR-136-3p          | 1 |
| <i>circZC3H6</i> | miR-142-5p          | 1 |
| <i>circZC3H6</i> | miR-145-5p          | 1 |
| <i>circZC3H6</i> | miR-146a-3p         | 2 |
| <i>circZC3H6</i> | miR-1825            | 2 |
| <i>circZC3H6</i> | miR-188-3p          | 3 |
| <i>circZC3H6</i> | miR-18a-3p          | 1 |
| <i>circZC3H6</i> | miR-1909-5p         | 1 |
| <i>circZC3H6</i> | miR-1914-5p         | 2 |
| <i>circZC3H6</i> | miR-192-5p/215-5p   | 1 |
| <i>circZC3H6</i> | miR-194-3p          | 2 |
| <i>circZC3H6</i> | miR-196-5p          | 1 |
| <i>circZC3H6</i> | miR-1976            | 4 |
| <i>circZC3H6</i> | miR-199-5p          | 2 |
| <i>circZC3H6</i> | miR-202-3p          | 4 |
| <i>circZC3H6</i> | miR-204-3p/4646-5p  | 3 |
| <i>circZC3H6</i> | miR-205-5p          | 1 |
| <i>circZC3H6</i> | miR-2053            | 1 |
| <i>circZC3H6</i> | miR-2054            | 1 |
| <i>circZC3H6</i> | miR-208-5p          | 1 |
| <i>circZC3H6</i> | miR-210-5p          | 3 |
| <i>circZC3H6</i> | miR-212-5p          | 2 |
| <i>circZC3H6</i> | miR-219a-2-3p       | 1 |
| <i>circZC3H6</i> | miR-219b-3p         | 1 |
| <i>circZC3H6</i> | miR-2392            | 1 |
| <i>circZC3H6</i> | miR-2682-3p/6781-3p | 2 |
| <i>circZC3H6</i> | miR-2909            | 1 |
| <i>circZC3H6</i> | miR-296-3p          | 1 |
| <i>circZC3H6</i> | miR-299-3p          | 1 |
| <i>circZC3H6</i> | miR-29b-1-5p        | 1 |
| <i>circZC3H6</i> | miR-302a-5p         | 1 |
| <i>circZC3H6</i> | miR-302f            | 1 |
| <i>circZC3H6</i> | miR-3117-5p         | 3 |
| <i>circZC3H6</i> | miR-3126-3p         | 1 |
| <i>circZC3H6</i> | miR-3135a           | 2 |
| <i>circZC3H6</i> | miR-3136-5p/4439    | 1 |
| <i>circZC3H6</i> | miR-3151-5p         | 2 |

|                  |                           |   |
|------------------|---------------------------|---|
| <i>circZC3H6</i> | miR-3152-3p               | 1 |
| <i>circZC3H6</i> | miR-3154                  | 3 |
| <i>circZC3H6</i> | miR-3156-3p               | 3 |
| <i>circZC3H6</i> | miR-3156-5p               | 2 |
| <i>circZC3H6</i> | miR-3158-3p               | 1 |
| <i>circZC3H6</i> | miR-3164                  | 3 |
| <i>circZC3H6</i> | miR-3166                  | 1 |
| <i>circZC3H6</i> | miR-3174                  | 1 |
| <i>circZC3H6</i> | miR-3176/3922-3p          | 2 |
| <i>circZC3H6</i> | miR-3183/4723-3p/6769b-3p | 1 |
| <i>circZC3H6</i> | miR-3185                  | 1 |
| <i>circZC3H6</i> | miR-3189-3p               | 2 |
| <i>circZC3H6</i> | miR-3190-3p               | 5 |
| <i>circZC3H6</i> | miR-3190-5p               | 2 |
| <i>circZC3H6</i> | miR-3192-3p               | 1 |
| <i>circZC3H6</i> | miR-3192-5p               | 3 |
| <i>circZC3H6</i> | miR-3194-5p               | 2 |
| <i>circZC3H6</i> | miR-3202                  | 4 |
| <i>circZC3H6</i> | miR-320e                  | 1 |
| <i>circZC3H6</i> | miR-323b-5p/410-5p/494-5p | 1 |
| <i>circZC3H6</i> | miR-324-3p/1913           | 1 |
| <i>circZC3H6</i> | miR-324-5p                | 1 |
| <i>circZC3H6</i> | miR-328-3p                | 2 |
| <i>circZC3H6</i> | miR-331-5p                | 2 |
| <i>circZC3H6</i> | miR-335-5p                | 2 |
| <i>circZC3H6</i> | miR-338-3p                | 1 |
| <i>circZC3H6</i> | miR-33a-3p                | 1 |
| <i>circZC3H6</i> | miR-33b-3p/515-3p/519e-3p | 1 |
| <i>circZC3H6</i> | miR-34-5p/449-5p          | 1 |
| <i>circZC3H6</i> | miR-3591-5p               | 1 |
| <i>circZC3H6</i> | miR-3607-5p               | 1 |
| <i>circZC3H6</i> | miR-3611                  | 2 |
| <i>circZC3H6</i> | miR-3614-3p               | 1 |
| <i>circZC3H6</i> | miR-3614-5p               | 2 |
| <i>circZC3H6</i> | miR-3653-3p               | 2 |
| <i>circZC3H6</i> | miR-3653-5p               | 4 |
| <i>circZC3H6</i> | miR-3654                  | 3 |
| <i>circZC3H6</i> | miR-3658                  | 1 |

|                  |                     |   |
|------------------|---------------------|---|
| <i>circZC3H6</i> | miR-3663-5p         | 1 |
| <i>circZC3H6</i> | miR-367-5p          | 1 |
| <i>circZC3H6</i> | miR-3674            | 1 |
| <i>circZC3H6</i> | miR-3681-5p         | 2 |
| <i>circZC3H6</i> | miR-3682-3p         | 1 |
| <i>circZC3H6</i> | miR-3691-5p         | 1 |
| <i>circZC3H6</i> | miR-371a-3p         | 1 |
| <i>circZC3H6</i> | miR-371b-3p         | 1 |
| <i>circZC3H6</i> | miR-378j/6839-5p    | 1 |
| <i>circZC3H6</i> | miR-381-3p          | 1 |
| <i>circZC3H6</i> | miR-3927-3p/6831-5p | 1 |
| <i>circZC3H6</i> | miR-3928-3p         | 1 |
| <i>circZC3H6</i> | miR-3928-5p/6806-3p | 1 |
| <i>circZC3H6</i> | miR-3938            | 1 |
| <i>circZC3H6</i> | miR-3945            | 1 |
| <i>circZC3H6</i> | miR-412-3p/6754-3p  | 1 |
| <i>circZC3H6</i> | miR-425-3p          | 1 |
| <i>circZC3H6</i> | miR-425-5p          | 1 |
| <i>circZC3H6</i> | miR-4253/6862-5p    | 1 |
| <i>circZC3H6</i> | miR-4259            | 1 |
| <i>circZC3H6</i> | miR-4264            | 1 |
| <i>circZC3H6</i> | miR-4265/4296/4322  | 2 |
| <i>circZC3H6</i> | miR-4266            | 1 |
| <i>circZC3H6</i> | miR-4278            | 1 |
| <i>circZC3H6</i> | miR-4297/5581-5p    | 1 |
| <i>circZC3H6</i> | miR-4310/7157-5p    | 1 |
| <i>circZC3H6</i> | miR-4312            | 1 |
| <i>circZC3H6</i> | miR-432-3p          | 1 |
| <i>circZC3H6</i> | miR-432-5p          | 2 |
| <i>circZC3H6</i> | miR-4328            | 2 |
| <i>circZC3H6</i> | miR-4330            | 1 |
| <i>circZC3H6</i> | miR-4446-3p         | 1 |
| <i>circZC3H6</i> | miR-4447/4472       | 2 |
| <i>circZC3H6</i> | miR-4474-5p         | 1 |
| <i>circZC3H6</i> | miR-4477a           | 1 |
| <i>circZC3H6</i> | miR-4485-5p         | 2 |
| <i>circZC3H6</i> | miR-4491/4657       | 1 |
| <i>circZC3H6</i> | miR-4493            | 2 |



|                  |                     |   |
|------------------|---------------------|---|
| <i>circZC3H6</i> | miR-4494            | 1 |
| <i>circZC3H6</i> | miR-449c-3p         | 2 |
| <i>circZC3H6</i> | miR-4501            | 3 |
| <i>circZC3H6</i> | miR-4502            | 1 |
| <i>circZC3H6</i> | miR-4503            | 2 |
| <i>circZC3H6</i> | miR-450b-3p/769-3p  | 2 |
| <i>circZC3H6</i> | miR-451             | 2 |
| <i>circZC3H6</i> | miR-4511            | 1 |
| <i>circZC3H6</i> | miR-4513/6855-3p    | 1 |
| <i>circZC3H6</i> | miR-4520-2-3p       | 2 |
| <i>circZC3H6</i> | miR-4520-3p         | 1 |
| <i>circZC3H6</i> | miR-4522            | 1 |
| <i>circZC3H6</i> | miR-4529-3p         | 2 |
| <i>circZC3H6</i> | miR-4530            | 1 |
| <i>circZC3H6</i> | miR-4533            | 4 |
| <i>circZC3H6</i> | miR-4639-5p         | 1 |
| <i>circZC3H6</i> | miR-4649-3p         | 2 |
| <i>circZC3H6</i> | miR-4656            | 1 |
| <i>circZC3H6</i> | miR-4666a-3p        | 1 |
| <i>circZC3H6</i> | miR-4675/4741       | 1 |
| <i>circZC3H6</i> | miR-4677-3p         | 2 |
| <i>circZC3H6</i> | miR-4678            | 1 |
| <i>circZC3H6</i> | miR-4679            | 2 |
| <i>circZC3H6</i> | miR-4688/6743-5p    | 2 |
| <i>circZC3H6</i> | miR-4693-3p         | 1 |
| <i>circZC3H6</i> | miR-4699-5p         | 1 |
| <i>circZC3H6</i> | miR-4707-5p         | 1 |
| <i>circZC3H6</i> | miR-4709-3p         | 3 |
| <i>circZC3H6</i> | miR-4712-3p         | 1 |
| <i>circZC3H6</i> | miR-4713-3p         | 1 |
| <i>circZC3H6</i> | miR-4715-5p         | 1 |
| <i>circZC3H6</i> | miR-4717-5p         | 1 |
| <i>circZC3H6</i> | miR-4722-3p/6727-3p | 1 |
| <i>circZC3H6</i> | miR-4749-3p         | 3 |
| <i>circZC3H6</i> | miR-4753-5p         | 1 |
| <i>circZC3H6</i> | miR-4755-3p         | 1 |
| <i>circZC3H6</i> | miR-4765            | 2 |
| <i>circZC3H6</i> | miR-4771            | 1 |

|                  |                              |   |
|------------------|------------------------------|---|
| <i>circZC3H6</i> | miR-4795-5p                  | 1 |
| <i>circZC3H6</i> | miR-4797-3p                  | 1 |
| <i>circZC3H6</i> | miR-4802-5p                  | 1 |
| <i>circZC3H6</i> | miR-486-3p                   | 4 |
| <i>circZC3H6</i> | miR-489-3p                   | 1 |
| <i>circZC3H6</i> | miR-491-5p                   | 2 |
| <i>circZC3H6</i> | miR-493-3p                   | 3 |
| <i>circZC3H6</i> | miR-496.2                    | 1 |
| <i>circZC3H6</i> | miR-4999-3p                  | 3 |
| <i>circZC3H6</i> | miR-499b-5p                  | 1 |
| <i>circZC3H6</i> | miR-5006-5p                  | 2 |
| <i>circZC3H6</i> | miR-505-3p.1                 | 1 |
| <i>circZC3H6</i> | miR-5088-5p                  | 1 |
| <i>circZC3H6</i> | miR-5089-5p                  | 2 |
| <i>circZC3H6</i> | miR-511-5p                   | 1 |
| <i>circZC3H6</i> | miR-513c-5p/514b-5p          | 2 |
| <i>circZC3H6</i> | miR-514a-3p                  | 2 |
| <i>circZC3H6</i> | miR-518a-5p/527              | 2 |
| <i>circZC3H6</i> | miR-5191                     | 1 |
| <i>circZC3H6</i> | miR-5197-3p                  | 1 |
| <i>circZC3H6</i> | miR-539-3p                   | 1 |
| <i>circZC3H6</i> | miR-548ai/548ag/548ba/570-5p | 2 |
| <i>circZC3H6</i> | miR-548au-3p                 | 1 |
| <i>circZC3H6</i> | miR-548aw                    | 2 |
| <i>circZC3H6</i> | miR-548b-3p                  | 1 |
| <i>circZC3H6</i> | miR-555                      | 1 |
| <i>circZC3H6</i> | miR-5580-5p                  | 2 |
| <i>circZC3H6</i> | miR-5586-3p                  | 2 |
| <i>circZC3H6</i> | miR-5586-5p                  | 1 |
| <i>circZC3H6</i> | miR-5587-3p                  | 1 |
| <i>circZC3H6</i> | miR-5587-5p                  | 1 |
| <i>circZC3H6</i> | miR-5681b                    | 1 |
| <i>circZC3H6</i> | miR-569                      | 1 |
| <i>circZC3H6</i> | miR-5690                     | 1 |
| <i>circZC3H6</i> | miR-5693                     | 2 |
| <i>circZC3H6</i> | miR-573/3616-5p              | 1 |
| <i>circZC3H6</i> | miR-593-5p                   | 1 |
| <i>circZC3H6</i> | miR-605-3p                   | 2 |

|                  |                     |   |
|------------------|---------------------|---|
| <i>circZC3H6</i> | miR-6076/6797-3p    | 1 |
| <i>circZC3H6</i> | miR-6078            | 2 |
| <i>circZC3H6</i> | miR-6079            | 6 |
| <i>circZC3H6</i> | miR-6081            | 1 |
| <i>circZC3H6</i> | miR-6084            | 2 |
| <i>circZC3H6</i> | miR-6085/6813-5p    | 2 |
| <i>circZC3H6</i> | miR-619-5p/6506-5p  | 3 |
| <i>circZC3H6</i> | miR-621             | 1 |
| <i>circZC3H6</i> | miR-622             | 1 |
| <i>circZC3H6</i> | miR-635/6774-5p     | 1 |
| <i>circZC3H6</i> | miR-638             | 1 |
| <i>circZC3H6</i> | miR-640             | 1 |
| <i>circZC3H6</i> | miR-641/3617-5p     | 1 |
| <i>circZC3H6</i> | miR-642a-5p         | 1 |
| <i>circZC3H6</i> | miR-642b-5p         | 1 |
| <i>circZC3H6</i> | miR-6500-3p         | 2 |
| <i>circZC3H6</i> | miR-6501-3p         | 1 |
| <i>circZC3H6</i> | miR-6514-5p         | 1 |
| <i>circZC3H6</i> | miR-6515-3p         | 1 |
| <i>circZC3H6</i> | miR-654-3p          | 1 |
| <i>circZC3H6</i> | miR-668-3p          | 2 |
| <i>circZC3H6</i> | miR-6721-5p         | 3 |
| <i>circZC3H6</i> | miR-6728-5p         | 2 |
| <i>circZC3H6</i> | miR-6742-5p         | 2 |
| <i>circZC3H6</i> | miR-6744-5p         | 1 |
| <i>circZC3H6</i> | miR-6746-5p         | 1 |
| <i>circZC3H6</i> | miR-6747-3p         | 1 |
| <i>circZC3H6</i> | miR-6748-5p         | 2 |
| <i>circZC3H6</i> | miR-6751-5p/6803-5p | 1 |
| <i>circZC3H6</i> | miR-6758-5p/6856-5p | 1 |
| <i>circZC3H6</i> | miR-6759-3p         | 1 |
| <i>circZC3H6</i> | miR-6759-5p         | 2 |
| <i>circZC3H6</i> | miR-6771-5p         | 1 |
| <i>circZC3H6</i> | miR-6776-3p         | 2 |
| <i>circZC3H6</i> | miR-6785-3p         | 1 |
| <i>circZC3H6</i> | miR-6789-5p         | 1 |
| <i>circZC3H6</i> | miR-6793-5p         | 2 |
| <i>circZC3H6</i> | miR-6796-5p         | 2 |

|                  |                           |   |
|------------------|---------------------------|---|
| <i>circZC3H6</i> | miR-6801-5p               | 3 |
| <i>circZC3H6</i> | miR-6808-3p               | 3 |
| <i>circZC3H6</i> | miR-6819-3p/6877-3p       | 1 |
| <i>circZC3H6</i> | miR-6823-5p               | 1 |
| <i>circZC3H6</i> | miR-6824-5p               | 1 |
| <i>circZC3H6</i> | miR-6829-5p               | 1 |
| <i>circZC3H6</i> | miR-6837-3p               | 1 |
| <i>circZC3H6</i> | miR-6838-3p               | 1 |
| <i>circZC3H6</i> | miR-6846-5p/6848-5p       | 1 |
| <i>circZC3H6</i> | miR-6857-3p               | 1 |
| <i>circZC3H6</i> | miR-6865-3p               | 1 |
| <i>circZC3H6</i> | miR-6868-3p               | 2 |
| <i>circZC3H6</i> | miR-6874-5p               | 1 |
| <i>circZC3H6</i> | miR-6883-3p               | 1 |
| <i>circZC3H6</i> | miR-6888-5p               | 2 |
| <i>circZC3H6</i> | miR-7109-5p               | 1 |
| <i>circZC3H6</i> | miR-7152-3p               | 1 |
| <i>circZC3H6</i> | miR-7162-3p               | 2 |
| <i>circZC3H6</i> | miR-744-3p                | 2 |
| <i>circZC3H6</i> | miR-758-3p                | 1 |
| <i>circZC3H6</i> | miR-762/4492/4498/5001-5p | 1 |
| <i>circZC3H6</i> | miR-7843-3p               | 1 |
| <i>circZC3H6</i> | miR-7844-5p               | 1 |
| <i>circZC3H6</i> | miR-7856-5p               | 2 |
| <i>circZC3H6</i> | miR-7973                  | 2 |
| <i>circZC3H6</i> | miR-7977                  | 2 |
| <i>circZC3H6</i> | miR-8056                  | 1 |
| <i>circZC3H6</i> | miR-8065                  | 1 |
| <i>circZC3H6</i> | miR-8066                  | 1 |
| <i>circZC3H6</i> | miR-8070                  | 1 |
| <i>circZC3H6</i> | miR-8076                  | 1 |
| <i>circZC3H6</i> | miR-8078                  | 1 |
| <i>circZC3H6</i> | miR-8081                  | 1 |
| <i>circZC3H6</i> | miR-8086                  | 1 |
| <i>circZC3H6</i> | miR-873-3p                | 1 |
| <i>circZC3H6</i> | miR-874-5p                | 2 |
| <i>circZC3H6</i> | miR-889-5p                | 2 |
| <i>circZC3H6</i> | miR-943                   | 1 |

|                   |                     |   |
|-------------------|---------------------|---|
| <i>circZNF148</i> | miR-1-5p            | 1 |
| <i>circZNF148</i> | miR-10-5p           | 1 |
| <i>circZNF148</i> | miR-101-3p.1        | 2 |
| <i>circZNF148</i> | miR-101-3p.2        | 2 |
| <i>circZNF148</i> | miR-101-5p          | 4 |
| <i>circZNF148</i> | miR-103b            | 1 |
| <i>circZNF148</i> | miR-105-3p          | 2 |
| <i>circZNF148</i> | miR-105-5p          | 1 |
| <i>circZNF148</i> | miR-106a-3p         | 2 |
| <i>circZNF148</i> | miR-1178-3p         | 1 |
| <i>circZNF148</i> | miR-1178-5p         | 1 |
| <i>circZNF148</i> | miR-1179            | 1 |
| <i>circZNF148</i> | miR-1182            | 1 |
| <i>circZNF148</i> | miR-1184            | 4 |
| <i>circZNF148</i> | miR-1185-5p         | 3 |
| <i>circZNF148</i> | miR-1193            | 1 |
| <i>circZNF148</i> | miR-1197            | 4 |
| <i>circZNF148</i> | miR-1199-5p/6751-3p | 1 |
| <i>circZNF148</i> | miR-1205            | 4 |
| <i>circZNF148</i> | miR-1208            | 1 |
| <i>circZNF148</i> | miR-122-5p          | 4 |
| <i>circZNF148</i> | miR-1224-5p         | 4 |
| <i>circZNF148</i> | miR-1226-3p         | 3 |
| <i>circZNF148</i> | miR-1227-5p         | 1 |
| <i>circZNF148</i> | miR-1228-5p         | 1 |
| <i>circZNF148</i> | miR-1229-3p         | 1 |
| <i>circZNF148</i> | miR-1231            | 6 |
| <i>circZNF148</i> | miR-1236-3p         | 3 |
| <i>circZNF148</i> | miR-1238-3p         | 3 |
| <i>circZNF148</i> | miR-124-5p          | 1 |
| <i>circZNF148</i> | miR-1243            | 5 |
| <i>circZNF148</i> | miR-1244            | 1 |
| <i>circZNF148</i> | miR-1245a/8079      | 2 |
| <i>circZNF148</i> | miR-1245b-3p        | 4 |
| <i>circZNF148</i> | miR-1246            | 2 |
| <i>circZNF148</i> | miR-125-5p          | 3 |
| <i>circZNF148</i> | miR-1250-3p         | 2 |
| <i>circZNF148</i> | miR-1252-3p         | 6 |

|                   |                          |   |
|-------------------|--------------------------|---|
| <i>circZNF148</i> | miR-1252-5p              | 6 |
| <i>circZNF148</i> | miR-1253                 | 1 |
| <i>circZNF148</i> | miR-1255b-2-3p           | 1 |
| <i>circZNF148</i> | miR-1257                 | 1 |
| <i>circZNF148</i> | miR-1262/4701-3p/6736-5p | 4 |
| <i>circZNF148</i> | miR-1264                 | 1 |
| <i>circZNF148</i> | miR-1265                 | 2 |
| <i>circZNF148</i> | miR-1266-3p              | 1 |
| <i>circZNF148</i> | miR-1268a/1268b          | 1 |
| <i>circZNF148</i> | miR-127-5p               | 2 |
| <i>circZNF148</i> | miR-1270                 | 3 |
| <i>circZNF148</i> | miR-1272                 | 3 |
| <i>circZNF148</i> | miR-1273g-3p             | 1 |
| <i>circZNF148</i> | miR-1273h-3p             | 3 |
| <i>circZNF148</i> | miR-1275/4665-5p         | 1 |
| <i>circZNF148</i> | miR-1276                 | 1 |
| <i>circZNF148</i> | miR-1278                 | 3 |
| <i>circZNF148</i> | miR-1279                 | 1 |
| <i>circZNF148</i> | miR-1282                 | 2 |
| <i>circZNF148</i> | miR-1285-5p              | 1 |
| <i>circZNF148</i> | miR-1286                 | 1 |
| <i>circZNF148</i> | miR-1289                 | 1 |
| <i>circZNF148</i> | miR-129-5p               | 1 |
| <i>circZNF148</i> | miR-1290                 | 2 |
| <i>circZNF148</i> | miR-1293/4483            | 3 |
| <i>circZNF148</i> | miR-1295b-3p             | 1 |
| <i>circZNF148</i> | miR-1298-3p              | 1 |
| <i>circZNF148</i> | miR-1298-5p              | 2 |
| <i>circZNF148</i> | miR-1299                 | 4 |
| <i>circZNF148</i> | miR-130-3p/301-3p/454-3p | 1 |
| <i>circZNF148</i> | miR-1301-3p              | 2 |
| <i>circZNF148</i> | miR-1302/4298            | 1 |
| <i>circZNF148</i> | miR-1304-3p              | 1 |
| <i>circZNF148</i> | miR-1304-5p              | 3 |
| <i>circZNF148</i> | miR-1305                 | 2 |
| <i>circZNF148</i> | miR-132-3p/212-3p        | 1 |
| <i>circZNF148</i> | miR-1322                 | 3 |
| <i>circZNF148</i> | miR-1323                 | 1 |

|                   |                                      |   |
|-------------------|--------------------------------------|---|
| <i>circZNF148</i> | miR-133a-3p.1                        | 2 |
| <i>circZNF148</i> | miR-1343-3p                          | 1 |
| <i>circZNF148</i> | miR-135a-3p                          | 1 |
| <i>circZNF148</i> | miR-136-5p                           | 1 |
| <i>circZNF148</i> | miR-138-2-3p                         | 1 |
| <i>circZNF148</i> | miR-139-3p                           | 3 |
| <i>circZNF148</i> | miR-139-5p                           | 5 |
| <i>circZNF148</i> | miR-140-3p.1                         | 1 |
| <i>circZNF148</i> | miR-140-3p.2                         | 1 |
| <i>circZNF148</i> | miR-141-5p                           | 4 |
| <i>circZNF148</i> | miR-143-5p                           | 7 |
| <i>circZNF148</i> | miR-144-3p                           | 2 |
| <i>circZNF148</i> | miR-144-5p                           | 2 |
| <i>circZNF148</i> | miR-146-5p                           | 1 |
| <i>circZNF148</i> | miR-1468-3p                          | 2 |
| <i>circZNF148</i> | miR-147a                             | 1 |
| <i>circZNF148</i> | miR-148a-5p                          | 1 |
| <i>circZNF148</i> | miR-148b-5p/6874-3p                  | 1 |
| <i>circZNF148</i> | miR-149-3p/4728-5p/6785-5p/6883-5p   | 1 |
| <i>circZNF148</i> | miR-149-5p                           | 1 |
| <i>circZNF148</i> | miR-15-5p/16-5p/195-5p/424-5p/497-5p | 1 |
| <i>circZNF148</i> | miR-150-5p                           | 1 |
| <i>circZNF148</i> | miR-151-3p                           | 1 |
| <i>circZNF148</i> | miR-153-5p                           | 1 |
| <i>circZNF148</i> | miR-154-3p/487-3p                    | 1 |
| <i>circZNF148</i> | miR-1587/3620-5p                     | 1 |
| <i>circZNF148</i> | miR-15b-3p                           | 1 |
| <i>circZNF148</i> | miR-16-1-3p                          | 1 |
| <i>circZNF148</i> | miR-17-3p                            | 4 |
| <i>circZNF148</i> | miR-17-5p/20-5p/93-5p/106-5p/519-3p  | 4 |
| <i>circZNF148</i> | miR-18-5p                            | 3 |
| <i>circZNF148</i> | miR-181-3p/4420                      | 1 |
| <i>circZNF148</i> | miR-183-5p.1                         | 2 |
| <i>circZNF148</i> | miR-185-3p                           | 3 |
| <i>circZNF148</i> | miR-185-5p                           | 4 |
| <i>circZNF148</i> | miR-186-3p                           | 1 |
| <i>circZNF148</i> | miR-186-5p                           | 1 |
| <i>circZNF148</i> | miR-188-5p                           | 1 |

|                   |                     |   |
|-------------------|---------------------|---|
| <i>circZNF148</i> | miR-19-3p           | 1 |
| <i>circZNF148</i> | miR-19-5p           | 1 |
| <i>circZNF148</i> | miR-190-5p          | 4 |
| <i>circZNF148</i> | miR-1908-5p         | 1 |
| <i>circZNF148</i> | miR-1909-3p/6722-3p | 1 |
| <i>circZNF148</i> | miR-1909-5p         | 1 |
| <i>circZNF148</i> | miR-191-5p          | 1 |
| <i>circZNF148</i> | miR-1914-5p         | 2 |
| <i>circZNF148</i> | miR-1915-5p         | 3 |
| <i>circZNF148</i> | miR-192-3p          | 1 |
| <i>circZNF148</i> | miR-192-5p/215-5p   | 2 |
| <i>circZNF148</i> | miR-193a-5p         | 1 |
| <i>circZNF148</i> | miR-194-5p          | 1 |
| <i>circZNF148</i> | miR-196-5p          | 1 |
| <i>circZNF148</i> | miR-197-3p          | 3 |
| <i>circZNF148</i> | miR-1976            | 1 |
| <i>circZNF148</i> | miR-199-3p          | 2 |
| <i>circZNF148</i> | miR-200c-5p/550a-3p | 1 |
| <i>circZNF148</i> | miR-202-3p          | 1 |
| <i>circZNF148</i> | miR-203a-3p.1       | 7 |
| <i>circZNF148</i> | miR-203b-3p         | 3 |
| <i>circZNF148</i> | miR-204-3p/4646-5p  | 1 |
| <i>circZNF148</i> | miR-205-3p          | 1 |
| <i>circZNF148</i> | miR-205-5p          | 1 |
| <i>circZNF148</i> | miR-2052            | 1 |
| <i>circZNF148</i> | miR-2054            | 3 |
| <i>circZNF148</i> | miR-208-5p          | 1 |
| <i>circZNF148</i> | miR-20a-3p          | 1 |
| <i>circZNF148</i> | miR-2113            | 1 |
| <i>circZNF148</i> | miR-2114-5p         | 1 |
| <i>circZNF148</i> | miR-2115-3p         | 1 |
| <i>circZNF148</i> | miR-2116-3p         | 1 |
| <i>circZNF148</i> | miR-2117            | 1 |
| <i>circZNF148</i> | miR-214-3p/3619-5p  | 1 |
| <i>circZNF148</i> | miR-214-5p          | 3 |
| <i>circZNF148</i> | miR-215-3p          | 1 |
| <i>circZNF148</i> | miR-216a-5p         | 1 |
| <i>circZNF148</i> | miR-216b-3p         | 2 |



|                   |                     |   |
|-------------------|---------------------|---|
| <i>circZNF148</i> | miR-216b-5p         | 1 |
| <i>circZNF148</i> | miR-217             | 2 |
| <i>circZNF148</i> | miR-219-5p          | 4 |
| <i>circZNF148</i> | miR-22-3p           | 1 |
| <i>circZNF148</i> | miR-221-3p/222-3p   | 3 |
| <i>circZNF148</i> | miR-222-5p          | 4 |
| <i>circZNF148</i> | miR-2276-3p         | 2 |
| <i>circZNF148</i> | miR-2278            | 2 |
| <i>circZNF148</i> | miR-23-3p           | 2 |
| <i>circZNF148</i> | miR-2355-5p         | 1 |
| <i>circZNF148</i> | miR-24-3p           | 1 |
| <i>circZNF148</i> | miR-24-5p           | 1 |
| <i>circZNF148</i> | miR-2681-5p         | 2 |
| <i>circZNF148</i> | miR-27-3p           | 1 |
| <i>circZNF148</i> | miR-27b-5p          | 1 |
| <i>circZNF148</i> | miR-28-3p           | 1 |
| <i>circZNF148</i> | miR-29-3p           | 1 |
| <i>circZNF148</i> | miR-296-3p          | 1 |
| <i>circZNF148</i> | miR-299-3p          | 4 |
| <i>circZNF148</i> | miR-29a-5p          | 2 |
| <i>circZNF148</i> | miR-29b-1-5p        | 3 |
| <i>circZNF148</i> | miR-29b-2-5p        | 1 |
| <i>circZNF148</i> | miR-30-3p           | 3 |
| <i>circZNF148</i> | miR-302a-5p         | 5 |
| <i>circZNF148</i> | miR-302b-5p/302d-5p | 2 |
| <i>circZNF148</i> | miR-3064-3p         | 1 |
| <i>circZNF148</i> | miR-3064-5p         | 1 |
| <i>circZNF148</i> | miR-3065-3p         | 2 |
| <i>circZNF148</i> | miR-3074-3p         | 2 |
| <i>circZNF148</i> | miR-31-3p           | 2 |
| <i>circZNF148</i> | miR-3120-3p         | 2 |
| <i>circZNF148</i> | miR-3123            | 2 |
| <i>circZNF148</i> | miR-3124-3p         | 2 |
| <i>circZNF148</i> | miR-3126-3p         | 1 |
| <i>circZNF148</i> | miR-3126-5p         | 1 |
| <i>circZNF148</i> | miR-3127-5p         | 2 |
| <i>circZNF148</i> | miR-3133            | 1 |
| <i>circZNF148</i> | miR-3134            | 3 |

|                   |                           |   |
|-------------------|---------------------------|---|
| <i>circZNF148</i> | miR-3140-5p               | 2 |
| <i>circZNF148</i> | miR-3143                  | 1 |
| <i>circZNF148</i> | miR-3146                  | 1 |
| <i>circZNF148</i> | miR-3149                  | 1 |
| <i>circZNF148</i> | miR-3150b-3p              | 1 |
| <i>circZNF148</i> | miR-3152-3p               | 3 |
| <i>circZNF148</i> | miR-3152-5p               | 1 |
| <i>circZNF148</i> | miR-3154                  | 1 |
| <i>circZNF148</i> | miR-3156-5p               | 3 |
| <i>circZNF148</i> | miR-3157-5p               | 1 |
| <i>circZNF148</i> | miR-3158-5p               | 4 |
| <i>circZNF148</i> | miR-3159                  | 9 |
| <i>circZNF148</i> | miR-3160-3p               | 2 |
| <i>circZNF148</i> | miR-3160-5p               | 1 |
| <i>circZNF148</i> | miR-3162-5p               | 1 |
| <i>circZNF148</i> | miR-3165                  | 4 |
| <i>circZNF148</i> | miR-3168                  | 1 |
| <i>circZNF148</i> | miR-3169                  | 1 |
| <i>circZNF148</i> | miR-3171                  | 2 |
| <i>circZNF148</i> | miR-3173-3p/6891-5p       | 1 |
| <i>circZNF148</i> | miR-3176/3922-3p          | 3 |
| <i>circZNF148</i> | miR-3180-5p               | 4 |
| <i>circZNF148</i> | miR-3182                  | 2 |
| <i>circZNF148</i> | miR-3184-3p               | 1 |
| <i>circZNF148</i> | miR-3185                  | 3 |
| <i>circZNF148</i> | miR-3187-3p               | 3 |
| <i>circZNF148</i> | miR-3189-5p               | 1 |
| <i>circZNF148</i> | miR-3190-5p               | 3 |
| <i>circZNF148</i> | miR-3192-5p               | 1 |
| <i>circZNF148</i> | miR-3193                  | 1 |
| <i>circZNF148</i> | miR-3198/4309             | 4 |
| <i>circZNF148</i> | miR-320                   | 1 |
| <i>circZNF148</i> | miR-3200-5p               | 2 |
| <i>circZNF148</i> | miR-3201/4791             | 3 |
| <i>circZNF148</i> | miR-3202                  | 5 |
| <i>circZNF148</i> | miR-323a-5p               | 3 |
| <i>circZNF148</i> | miR-323b-5p/410-5p/494-5p | 4 |
| <i>circZNF148</i> | miR-330-3p                | 1 |

|                   |                    |   |
|-------------------|--------------------|---|
| <i>circZNF148</i> | miR-330-3p.2       | 2 |
| <i>circZNF148</i> | miR-335-3p         | 2 |
| <i>circZNF148</i> | miR-338-5p         | 1 |
| <i>circZNF148</i> | miR-34-5p/449-5p   | 1 |
| <i>circZNF148</i> | miR-345-3p         | 2 |
| <i>circZNF148</i> | miR-34a-3p         | 1 |
| <i>circZNF148</i> | miR-34b-3p         | 3 |
| <i>circZNF148</i> | miR-34c-3p         | 3 |
| <i>circZNF148</i> | miR-3529-3p        | 3 |
| <i>circZNF148</i> | miR-3605-5p        | 3 |
| <i>circZNF148</i> | miR-3607-5p        | 1 |
| <i>circZNF148</i> | miR-3610           | 2 |
| <i>circZNF148</i> | miR-3611           | 1 |
| <i>circZNF148</i> | miR-3613-3p        | 1 |
| <i>circZNF148</i> | miR-3613-5p        | 3 |
| <i>circZNF148</i> | miR-3614-5p        | 1 |
| <i>circZNF148</i> | miR-3617-3p        | 1 |
| <i>circZNF148</i> | miR-3618           | 3 |
| <i>circZNF148</i> | miR-3619-3p        | 1 |
| <i>circZNF148</i> | miR-362-5p/500b-5p | 4 |
| <i>circZNF148</i> | miR-3620-3p        | 1 |
| <i>circZNF148</i> | miR-3622a-5p       | 2 |
| <i>circZNF148</i> | miR-3622b-5p       | 1 |
| <i>circZNF148</i> | miR-363-5p/6745    | 3 |
| <i>circZNF148</i> | miR-3646           | 6 |
| <i>circZNF148</i> | miR-3649           | 2 |
| <i>circZNF148</i> | miR-365-3p         | 1 |
| <i>circZNF148</i> | miR-3651           | 1 |
| <i>circZNF148</i> | miR-3653-3p        | 1 |
| <i>circZNF148</i> | miR-3653-5p        | 1 |
| <i>circZNF148</i> | miR-3654           | 5 |
| <i>circZNF148</i> | miR-3658           | 1 |
| <i>circZNF148</i> | miR-3659           | 3 |
| <i>circZNF148</i> | miR-3662           | 1 |
| <i>circZNF148</i> | miR-3663-3p        | 1 |
| <i>circZNF148</i> | miR-3667-3p        | 1 |
| <i>circZNF148</i> | miR-3668           | 2 |
| <i>circZNF148</i> | miR-3672/6864-3p   | 3 |

|                   |                     |   |
|-------------------|---------------------|---|
| <i>circZNF148</i> | miR-3675-3p         | 1 |
| <i>circZNF148</i> | miR-3675-5p         | 1 |
| <i>circZNF148</i> | miR-3678-3p         | 3 |
| <i>circZNF148</i> | miR-3680-3p         | 1 |
| <i>circZNF148</i> | miR-3682-5p         | 3 |
| <i>circZNF148</i> | miR-3686            | 1 |
| <i>circZNF148</i> | miR-3688-3p         | 2 |
| <i>circZNF148</i> | miR-3691-3p         | 2 |
| <i>circZNF148</i> | miR-3691-5p         | 1 |
| <i>circZNF148</i> | miR-370-3p          | 2 |
| <i>circZNF148</i> | miR-376-3p          | 2 |
| <i>circZNF148</i> | miR-376a-2-5p       | 1 |
| <i>circZNF148</i> | miR-376a-5p         | 1 |
| <i>circZNF148</i> | miR-378g            | 1 |
| <i>circZNF148</i> | miR-378j/6839-5p    | 1 |
| <i>circZNF148</i> | miR-379-5p          | 1 |
| <i>circZNF148</i> | miR-380-3p          | 2 |
| <i>circZNF148</i> | miR-383-3p          | 2 |
| <i>circZNF148</i> | miR-3911            | 1 |
| <i>circZNF148</i> | miR-3912-5p         | 1 |
| <i>circZNF148</i> | miR-3915            | 4 |
| <i>circZNF148</i> | miR-3918            | 1 |
| <i>circZNF148</i> | miR-3919            | 4 |
| <i>circZNF148</i> | miR-3925-5p         | 2 |
| <i>circZNF148</i> | miR-3927-3p/6831-5p | 1 |
| <i>circZNF148</i> | miR-3928-3p         | 1 |
| <i>circZNF148</i> | miR-3934-3p         | 1 |
| <i>circZNF148</i> | miR-3935            | 1 |
| <i>circZNF148</i> | miR-3942-3p         | 2 |
| <i>circZNF148</i> | miR-3943            | 1 |
| <i>circZNF148</i> | miR-3944-5p         | 1 |
| <i>circZNF148</i> | miR-3945            | 2 |
| <i>circZNF148</i> | miR-3976            | 1 |
| <i>circZNF148</i> | miR-3977            | 1 |
| <i>circZNF148</i> | miR-3978            | 2 |
| <i>circZNF148</i> | miR-411-5p.1        | 1 |
| <i>circZNF148</i> | miR-424-3p          | 1 |
| <i>circZNF148</i> | miR-425-3p          | 1 |

|                   |                                    |   |
|-------------------|------------------------------------|---|
| <i>circZNF148</i> | miR-4253/6862-5p                   | 2 |
| <i>circZNF148</i> | miR-4255                           | 4 |
| <i>circZNF148</i> | miR-4256                           | 1 |
| <i>circZNF148</i> | miR-4261                           | 2 |
| <i>circZNF148</i> | miR-4263                           | 2 |
| <i>circZNF148</i> | miR-4264                           | 1 |
| <i>circZNF148</i> | miR-4269/6715b-5p                  | 1 |
| <i>circZNF148</i> | miR-4272                           | 1 |
| <i>circZNF148</i> | miR-4274                           | 1 |
| <i>circZNF148</i> | miR-4282                           | 2 |
| <i>circZNF148</i> | miR-4284                           | 1 |
| <i>circZNF148</i> | miR-4291                           | 3 |
| <i>circZNF148</i> | miR-4293                           | 2 |
| <i>circZNF148</i> | miR-4294                           | 1 |
| <i>circZNF148</i> | miR-4297/5581-5p                   | 1 |
| <i>circZNF148</i> | miR-4303                           | 1 |
| <i>circZNF148</i> | miR-4304                           | 4 |
| <i>circZNF148</i> | miR-4310/7157-5p                   | 2 |
| <i>circZNF148</i> | miR-4311                           | 1 |
| <i>circZNF148</i> | miR-4318                           | 3 |
| <i>circZNF148</i> | miR-432-5p                         | 2 |
| <i>circZNF148</i> | miR-4320                           | 3 |
| <i>circZNF148</i> | miR-4323                           | 1 |
| <i>circZNF148</i> | miR-4324                           | 1 |
| <i>circZNF148</i> | miR-4325                           | 1 |
| <i>circZNF148</i> | miR-433-5p                         | 1 |
| <i>circZNF148</i> | miR-4330                           | 1 |
| <i>circZNF148</i> | miR-4419a/4510/6127/6129/6130/6133 | 1 |
| <i>circZNF148</i> | miR-4422                           | 2 |
| <i>circZNF148</i> | miR-4423-3p                        | 1 |
| <i>circZNF148</i> | miR-4424                           | 1 |
| <i>circZNF148</i> | miR-4427                           | 3 |
| <i>circZNF148</i> | miR-4428                           | 1 |
| <i>circZNF148</i> | miR-4432                           | 2 |
| <i>circZNF148</i> | miR-4433a-3p                       | 4 |
| <i>circZNF148</i> | miR-4433b-3p                       | 1 |
| <i>circZNF148</i> | miR-4433b-5p                       | 1 |
| <i>circZNF148</i> | miR-4435                           | 3 |

|                   |                                              |   |
|-------------------|----------------------------------------------|---|
| <i>circZNF148</i> | miR-4436b-3p/4632-5p/6735-5p/6879-5p/7843-5p |   |
| <i>circZNF148</i> | miR-4437                                     | 1 |
| <i>circZNF148</i> | miR-4438                                     | 1 |
| <i>circZNF148</i> | miR-4445-5p                                  | 4 |
| <i>circZNF148</i> | miR-4446-5p                                  | 1 |
| <i>circZNF148</i> | miR-4451                                     | 1 |
| <i>circZNF148</i> | miR-4453/4538                                | 2 |
| <i>circZNF148</i> | miR-4455                                     | 1 |
| <i>circZNF148</i> | miR-4459                                     | 4 |
| <i>circZNF148</i> | miR-4461                                     | 2 |
| <i>circZNF148</i> | miR-4467                                     | 4 |
| <i>circZNF148</i> | miR-4468                                     | 2 |
| <i>circZNF148</i> | miR-4470                                     | 1 |
| <i>circZNF148</i> | miR-4474-3p                                  | 6 |
| <i>circZNF148</i> | miR-4474-5p                                  | 1 |
| <i>circZNF148</i> | miR-4475                                     | 1 |
| <i>circZNF148</i> | miR-4476/6876-5p                             | 1 |
| <i>circZNF148</i> | miR-4477b                                    | 2 |
| <i>circZNF148</i> | miR-4482-3p                                  | 1 |
| <i>circZNF148</i> | miR-4486                                     | 1 |
| <i>circZNF148</i> | miR-4487                                     | 2 |
| <i>circZNF148</i> | miR-4491/4657                                | 4 |
| <i>circZNF148</i> | miR-4496                                     | 1 |
| <i>circZNF148</i> | miR-4501                                     | 2 |
| <i>circZNF148</i> | miR-4502                                     | 3 |
| <i>circZNF148</i> | miR-4503                                     | 4 |
| <i>circZNF148</i> | miR-4504                                     | 1 |
| <i>circZNF148</i> | miR-4506                                     | 4 |
| <i>circZNF148</i> | miR-450b-5p                                  | 1 |
| <i>circZNF148</i> | miR-4511                                     | 2 |
| <i>circZNF148</i> | miR-4514/4692                                | 1 |
| <i>circZNF148</i> | miR-4519                                     | 1 |
| <i>circZNF148</i> | miR-452-3p                                   | 1 |
| <i>circZNF148</i> | miR-452-5p/892-3p                            | 2 |
| <i>circZNF148</i> | miR-4524a-3p                                 | 7 |
| <i>circZNF148</i> | miR-4524b-3p                                 | 1 |
| <i>circZNF148</i> | miR-4531                                     | 3 |
| <i>circZNF148</i> | miR-4533                                     | 5 |

|                   |                          |   |
|-------------------|--------------------------|---|
| <i>circZNF148</i> | miR-4534/8082            | 3 |
| <i>circZNF148</i> | miR-4536-5p              | 3 |
| <i>circZNF148</i> | miR-454-5p               | 1 |
| <i>circZNF148</i> | miR-455-3p.2             | 7 |
| <i>circZNF148</i> | miR-4633-3p/6500-5p      | 2 |
| <i>circZNF148</i> | miR-4633-5p              | 3 |
| <i>circZNF148</i> | miR-4635                 | 2 |
| <i>circZNF148</i> | miR-4642                 | 2 |
| <i>circZNF148</i> | miR-4643                 | 1 |
| <i>circZNF148</i> | miR-4645-3p              | 1 |
| <i>circZNF148</i> | miR-4650-3p              | 1 |
| <i>circZNF148</i> | miR-4652-3p              | 2 |
| <i>circZNF148</i> | miR-466                  | 1 |
| <i>circZNF148</i> | miR-4660                 | 2 |
| <i>circZNF148</i> | miR-4666b                | 1 |
| <i>circZNF148</i> | miR-4667-5p/4700-5p/8089 | 1 |
| <i>circZNF148</i> | miR-4674                 | 1 |
| <i>circZNF148</i> | miR-4680-3p              | 3 |
| <i>circZNF148</i> | miR-4680-5p              | 2 |
| <i>circZNF148</i> | miR-4682                 | 1 |
| <i>circZNF148</i> | miR-4683                 | 3 |
| <i>circZNF148</i> | miR-4687-3p              | 1 |
| <i>circZNF148</i> | miR-4689/6858-5p         | 4 |
| <i>circZNF148</i> | miR-4690-3p/5685         | 1 |
| <i>circZNF148</i> | miR-4690-5p              | 2 |
| <i>circZNF148</i> | miR-4691-5p/6792-3p      | 1 |
| <i>circZNF148</i> | miR-4693-5p              | 3 |
| <i>circZNF148</i> | miR-4698                 | 2 |
| <i>circZNF148</i> | miR-4699-3p              | 1 |
| <i>circZNF148</i> | miR-4699-5p              | 1 |
| <i>circZNF148</i> | miR-4700-3p              | 7 |
| <i>circZNF148</i> | miR-4704-3p              | 1 |
| <i>circZNF148</i> | miR-4709-3p              | 2 |
| <i>circZNF148</i> | miR-4709-5p              | 3 |
| <i>circZNF148</i> | miR-4711-3p              | 7 |
| <i>circZNF148</i> | miR-4711-5p              | 1 |
| <i>circZNF148</i> | miR-4712-3p              | 5 |
| <i>circZNF148</i> | miR-4713-5p              | 2 |

|                   |                     |   |
|-------------------|---------------------|---|
| <i>circZNF148</i> | miR-4716-5p         | 1 |
| <i>circZNF148</i> | miR-4717-3p         | 3 |
| <i>circZNF148</i> | miR-4719            | 1 |
| <i>circZNF148</i> | miR-4722-3p/6727-3p | 1 |
| <i>circZNF148</i> | miR-4722-5p         | 1 |
| <i>circZNF148</i> | miR-4724-3p         | 1 |
| <i>circZNF148</i> | miR-4724-5p         | 1 |
| <i>circZNF148</i> | miR-4728-3p         | 3 |
| <i>circZNF148</i> | miR-4730            | 5 |
| <i>circZNF148</i> | miR-4731-5p         | 2 |
| <i>circZNF148</i> | miR-4732-3p         | 3 |
| <i>circZNF148</i> | miR-4733-3p         | 3 |
| <i>circZNF148</i> | miR-4738-3p         | 2 |
| <i>circZNF148</i> | miR-4739            | 1 |
| <i>circZNF148</i> | miR-4742-5p         | 1 |
| <i>circZNF148</i> | miR-4743-3p         | 2 |
| <i>circZNF148</i> | miR-4750-3p         | 1 |
| <i>circZNF148</i> | miR-4752            | 1 |
| <i>circZNF148</i> | miR-4753-3p         | 2 |
| <i>circZNF148</i> | miR-4755-5p/5006-3p | 1 |
| <i>circZNF148</i> | miR-4756-3p         | 4 |
| <i>circZNF148</i> | miR-4758-3p         | 1 |
| <i>circZNF148</i> | miR-4759            | 1 |
| <i>circZNF148</i> | miR-4760-3p         | 2 |
| <i>circZNF148</i> | miR-4761-3p         | 2 |
| <i>circZNF148</i> | miR-4762-3p         | 4 |
| <i>circZNF148</i> | miR-4762-5p         | 1 |
| <i>circZNF148</i> | miR-4763-5p         | 1 |
| <i>circZNF148</i> | miR-4764-3p         | 1 |
| <i>circZNF148</i> | miR-4766-5p         | 2 |
| <i>circZNF148</i> | miR-4768-3p         | 4 |
| <i>circZNF148</i> | miR-4772-3p         | 2 |
| <i>circZNF148</i> | miR-4774-3p         | 1 |
| <i>circZNF148</i> | miR-4776-3p         | 1 |
| <i>circZNF148</i> | miR-4778-5p         | 1 |
| <i>circZNF148</i> | miR-4782-5p/5706    | 4 |
| <i>circZNF148</i> | miR-4786-3p         | 2 |
| <i>circZNF148</i> | miR-4789-3p         | 1 |



|                   |                             |   |
|-------------------|-----------------------------|---|
| <i>circZNF148</i> | miR-4790-3p                 | 1 |
| <i>circZNF148</i> | miR-4793-5p                 | 2 |
| <i>circZNF148</i> | miR-4795-5p                 | 3 |
| <i>circZNF148</i> | miR-4797-3p                 | 1 |
| <i>circZNF148</i> | miR-4797-5p                 | 1 |
| <i>circZNF148</i> | miR-4799-5p                 | 1 |
| <i>circZNF148</i> | miR-4802-5p                 | 1 |
| <i>circZNF148</i> | miR-4803                    | 1 |
| <i>circZNF148</i> | miR-486-3p                  | 1 |
| <i>circZNF148</i> | miR-488-3p                  | 4 |
| <i>circZNF148</i> | miR-489-3p                  | 1 |
| <i>circZNF148</i> | miR-490-5p                  | 1 |
| <i>circZNF148</i> | miR-492                     | 1 |
| <i>circZNF148</i> | miR-494-3p                  | 2 |
| <i>circZNF148</i> | miR-495-3p                  | 1 |
| <i>circZNF148</i> | miR-497-3p                  | 2 |
| <i>circZNF148</i> | miR-498                     | 4 |
| <i>circZNF148</i> | miR-5000-3p                 | 4 |
| <i>circZNF148</i> | miR-5003-3p                 | 3 |
| <i>circZNF148</i> | miR-5008-3p/6737-3p/7157-3p | 1 |
| <i>circZNF148</i> | miR-5009-3p                 | 1 |
| <i>circZNF148</i> | miR-501-3p/502-3p           | 1 |
| <i>circZNF148</i> | miR-501-5p                  | 4 |
| <i>circZNF148</i> | miR-5010-3p                 | 1 |
| <i>circZNF148</i> | miR-5011-3p                 | 1 |
| <i>circZNF148</i> | miR-502-5p                  | 4 |
| <i>circZNF148</i> | miR-503-5p                  | 1 |
| <i>circZNF148</i> | miR-504-5p.1                | 1 |
| <i>circZNF148</i> | miR-506-5p                  | 3 |
| <i>circZNF148</i> | miR-507/557                 | 1 |
| <i>circZNF148</i> | miR-508-3p                  | 4 |
| <i>circZNF148</i> | miR-5087                    | 1 |
| <i>circZNF148</i> | miR-509-3-5p/509-5p/4418    | 2 |
| <i>circZNF148</i> | miR-5093                    | 2 |
| <i>circZNF148</i> | miR-5095/7151-3p            | 4 |
| <i>circZNF148</i> | miR-510-3p                  | 1 |
| <i>circZNF148</i> | miR-511-5p                  | 1 |
| <i>circZNF148</i> | miR-513a-5p                 | 1 |

|                   |                                                                  |   |
|-------------------|------------------------------------------------------------------|---|
| <i>circZNF148</i> | miR-513b-3p                                                      | 2 |
| <i>circZNF148</i> | miR-513b-5p                                                      | 1 |
| <i>circZNF148</i> | miR-515-5p/519e-5p                                               | 1 |
| <i>circZNF148</i> | miR-516b-5p                                                      | 4 |
| <i>circZNF148</i> | miR-5187-3p                                                      | 3 |
| <i>circZNF148</i> | miR-5187-5p                                                      | 2 |
| <i>circZNF148</i> | miR-5188                                                         | 2 |
| <i>circZNF148</i> | miR-518a-5p/527                                                  | 1 |
| <i>circZNF148</i> | miR-5190                                                         | 1 |
| <i>circZNF148</i> | miR-5191                                                         | 2 |
| <i>circZNF148</i> | miR-5192                                                         | 4 |
| <i>circZNF148</i> | miR-5193                                                         | 1 |
| <i>circZNF148</i> | miR-5195-5p                                                      | 1 |
| <i>circZNF148</i> | miR-5196-3p                                                      | 2 |
| <i>circZNF148</i> | miR-5197-3p                                                      | 3 |
| <i>circZNF148</i> | miR-520g-5p                                                      | 1 |
| <i>circZNF148</i> | miR-524-5p                                                       | 1 |
| <i>circZNF148</i> | miR-525-5p                                                       | 2 |
| <i>circZNF148</i> | miR-532-3p                                                       | 1 |
| <i>circZNF148</i> | miR-532-5p                                                       | 4 |
| <i>circZNF148</i> | miR-539-3p                                                       | 3 |
| <i>circZNF148</i> | miR-541-5p                                                       | 1 |
| <i>circZNF148</i> | miR-542-3p                                                       | 1 |
| <i>circZNF148</i> | miR-543                                                          | 5 |
| <i>circZNF148</i> | miR-544b                                                         | 1 |
| <i>circZNF148</i> | miR-545-5p                                                       | 1 |
| <i>circZNF148</i> | miR-548ac/548bb-3p/548d-3p/548h-3p/548z                          | 2 |
| <i>circZNF148</i> | miR-548ad-3p                                                     | 1 |
| <i>circZNF148</i> | miR-548ah-5p/3609                                                | 4 |
| <i>circZNF148</i> | miR-548ai/548ag/548ba/570-5p                                     | 1 |
| <i>circZNF148</i> | miR-548aj-5p/548f-5p/548g-5p/548x-5p                             | 2 |
| <i>circZNF148</i> | miR-548ao-5p/548ax                                               | 4 |
| <i>circZNF148</i> | miR-548ap-3p/548aa/548t-3p                                       | 2 |
| <i>circZNF148</i> | miR-548aq-3p/548am-3p/548aj-3p/548ah-3p/548ae-3p/548j-3p/548x-3p | 2 |
| <i>circZNF148</i> | miR-548as-3p                                                     | 2 |
| <i>circZNF148</i> | miR-548au-3p                                                     | 1 |
| <i>circZNF148</i> | miR-548av-3p                                                     | 5 |
| <i>circZNF148</i> | miR-548aw                                                        | 1 |

|                   |                       |   |
|-------------------|-----------------------|---|
| <i>circZNF148</i> | miR-548ay-3p/548at-3p | 2 |
| <i>circZNF148</i> | miR-548b-3p           | 2 |
| <i>circZNF148</i> | miR-548c-3p           | 2 |
| <i>circZNF148</i> | miR-548e-5p           | 1 |
| <i>circZNF148</i> | miR-548g-3p           | 1 |
| <i>circZNF148</i> | miR-548m              | 2 |
| <i>circZNF148</i> | miR-548s              | 3 |
| <i>circZNF148</i> | miR-548u/7161-5p      | 1 |
| <i>circZNF148</i> | miR-548v              | 3 |
| <i>circZNF148</i> | miR-549a              | 3 |
| <i>circZNF148</i> | miR-551b-5p           | 1 |
| <i>circZNF148</i> | miR-553               | 1 |
| <i>circZNF148</i> | miR-555               | 1 |
| <i>circZNF148</i> | miR-556-3p            | 1 |
| <i>circZNF148</i> | miR-556-5p            | 1 |
| <i>circZNF148</i> | miR-558               | 2 |
| <i>circZNF148</i> | miR-5580-3p           | 1 |
| <i>circZNF148</i> | miR-5580-5p           | 1 |
| <i>circZNF148</i> | miR-5581-3p           | 2 |
| <i>circZNF148</i> | miR-5582-5p           | 2 |
| <i>circZNF148</i> | miR-5584-3p           | 1 |
| <i>circZNF148</i> | miR-5585-5p           | 4 |
| <i>circZNF148</i> | miR-5586-5p           | 2 |
| <i>circZNF148</i> | miR-5587-5p           | 1 |
| <i>circZNF148</i> | miR-5588-3p           | 1 |
| <i>circZNF148</i> | miR-5589-3p           | 1 |
| <i>circZNF148</i> | miR-5589-5p           | 2 |
| <i>circZNF148</i> | miR-561-5p            | 1 |
| <i>circZNF148</i> | miR-562               | 2 |
| <i>circZNF148</i> | miR-5681a             | 3 |
| <i>circZNF148</i> | miR-5681b             | 3 |
| <i>circZNF148</i> | miR-5683              | 1 |
| <i>circZNF148</i> | miR-5684              | 1 |
| <i>circZNF148</i> | miR-5687              | 2 |
| <i>circZNF148</i> | miR-5690              | 1 |
| <i>circZNF148</i> | miR-5696              | 1 |
| <i>circZNF148</i> | miR-5697              | 2 |
| <i>circZNF148</i> | miR-5699-5p           | 1 |

|                   |                                      |   |
|-------------------|--------------------------------------|---|
| <i>circZNF148</i> | miR-570-3p                           | 1 |
| <i>circZNF148</i> | miR-5700                             | 5 |
| <i>circZNF148</i> | miR-5701                             | 1 |
| <i>circZNF148</i> | miR-5702                             | 1 |
| <i>circZNF148</i> | miR-5707                             | 2 |
| <i>circZNF148</i> | miR-573/3616-5p                      | 4 |
| <i>circZNF148</i> | miR-574-5p                           | 3 |
| <i>circZNF148</i> | miR-575/4676-5p                      | 1 |
| <i>circZNF148</i> | miR-576-5p                           | 2 |
| <i>circZNF148</i> | miR-577                              | 1 |
| <i>circZNF148</i> | miR-578                              | 1 |
| <i>circZNF148</i> | miR-579-3p                           | 1 |
| <i>circZNF148</i> | miR-580-3p                           | 1 |
| <i>circZNF148</i> | miR-580-5p                           | 1 |
| <i>circZNF148</i> | miR-582-5p                           | 2 |
| <i>circZNF148</i> | miR-583                              | 1 |
| <i>circZNF148</i> | miR-585-3p                           | 1 |
| <i>circZNF148</i> | miR-588                              | 3 |
| <i>circZNF148</i> | miR-589-5p                           | 1 |
| <i>circZNF148</i> | miR-593-3p                           | 1 |
| <i>circZNF148</i> | miR-593-5p                           | 1 |
| <i>circZNF148</i> | miR-595                              | 4 |
| <i>circZNF148</i> | miR-596                              | 2 |
| <i>circZNF148</i> | miR-600                              | 4 |
| <i>circZNF148</i> | miR-6076/6797-3p                     | 4 |
| <i>circZNF148</i> | miR-6077                             | 2 |
| <i>circZNF148</i> | miR-6079                             | 6 |
| <i>circZNF148</i> | miR-6082                             | 1 |
| <i>circZNF148</i> | miR-609                              | 1 |
| <i>circZNF148</i> | miR-610                              | 5 |
| <i>circZNF148</i> | miR-612/1285-3p/3187-5p/5189-5p/6860 | 1 |
| <i>circZNF148</i> | miR-6128                             | 5 |
| <i>circZNF148</i> | miR-6132/6836-5p                     | 1 |
| <i>circZNF148</i> | miR-6165                             | 2 |
| <i>circZNF148</i> | miR-617                              | 1 |
| <i>circZNF148</i> | miR-618                              | 2 |
| <i>circZNF148</i> | miR-619-5p/6506-5p                   | 1 |
| <i>circZNF148</i> | miR-622                              | 8 |

|                   |                  |   |
|-------------------|------------------|---|
| <i>circZNF148</i> | miR-624-5p       | 1 |
| <i>circZNF148</i> | miR-627-5p       | 1 |
| <i>circZNF148</i> | miR-629-3p       | 3 |
| <i>circZNF148</i> | miR-631/3661     | 1 |
| <i>circZNF148</i> | miR-632/4288     | 6 |
| <i>circZNF148</i> | miR-633          | 1 |
| <i>circZNF148</i> | miR-634          | 1 |
| <i>circZNF148</i> | miR-637          | 1 |
| <i>circZNF148</i> | miR-644a         | 1 |
| <i>circZNF148</i> | miR-646          | 1 |
| <i>circZNF148</i> | miR-647          | 1 |
| <i>circZNF148</i> | miR-6500-3p      | 1 |
| <i>circZNF148</i> | miR-6501-3p      | 1 |
| <i>circZNF148</i> | miR-6503-3p      | 1 |
| <i>circZNF148</i> | miR-6505-3p      | 1 |
| <i>circZNF148</i> | miR-6508-5p/8067 | 1 |
| <i>circZNF148</i> | miR-6509-5p      | 1 |
| <i>circZNF148</i> | miR-651-3p       | 1 |
| <i>circZNF148</i> | miR-6510-5p      | 2 |
| <i>circZNF148</i> | miR-6511-3p      | 3 |
| <i>circZNF148</i> | miR-6512-5p      | 1 |
| <i>circZNF148</i> | miR-6514-5p      | 1 |
| <i>circZNF148</i> | miR-6515-3p      | 3 |
| <i>circZNF148</i> | miR-6516-5p      | 1 |
| <i>circZNF148</i> | miR-653-3p       | 1 |
| <i>circZNF148</i> | miR-653-5p       | 1 |
| <i>circZNF148</i> | miR-654-3p       | 1 |
| <i>circZNF148</i> | miR-654-5p       | 1 |
| <i>circZNF148</i> | miR-656-3p       | 1 |
| <i>circZNF148</i> | miR-659-3p       | 1 |
| <i>circZNF148</i> | miR-659-5p       | 1 |
| <i>circZNF148</i> | miR-660-3p       | 1 |
| <i>circZNF148</i> | miR-663b         | 2 |
| <i>circZNF148</i> | miR-664a-3p      | 3 |
| <i>circZNF148</i> | miR-664a-5p/4794 | 1 |
| <i>circZNF148</i> | miR-665          | 1 |
| <i>circZNF148</i> | miR-670-3p       | 3 |
| <i>circZNF148</i> | miR-670-5p       | 2 |

|                   |                             |   |
|-------------------|-----------------------------|---|
| <i>circZNF148</i> | miR-6715a-3p                | 2 |
| <i>circZNF148</i> | miR-6721-5p                 | 1 |
| <i>circZNF148</i> | miR-6728-3p                 | 1 |
| <i>circZNF148</i> | miR-6730-5p                 | 3 |
| <i>circZNF148</i> | miR-6734-3p                 | 1 |
| <i>circZNF148</i> | miR-6735-3p                 | 2 |
| <i>circZNF148</i> | miR-6736-3p                 | 1 |
| <i>circZNF148</i> | miR-6740-3p                 | 6 |
| <i>circZNF148</i> | miR-6741-5p                 | 4 |
| <i>circZNF148</i> | miR-6742-3p                 | 1 |
| <i>circZNF148</i> | miR-6747-3p                 | 1 |
| <i>circZNF148</i> | miR-6748-5p                 | 1 |
| <i>circZNF148</i> | miR-6749-3p                 | 1 |
| <i>circZNF148</i> | miR-6750-3p                 | 3 |
| <i>circZNF148</i> | miR-6751-5p/6803-5p         | 1 |
| <i>circZNF148</i> | miR-6752-5p/6842-5p/7110-5p | 1 |
| <i>circZNF148</i> | miR-6753-5p                 | 3 |
| <i>circZNF148</i> | miR-6756-5p/6766-5p         | 3 |
| <i>circZNF148</i> | miR-6757-5p                 | 1 |
| <i>circZNF148</i> | miR-6758-3p                 | 1 |
| <i>circZNF148</i> | miR-6758-5p/6856-5p         | 1 |
| <i>circZNF148</i> | miR-6759-3p                 | 2 |
| <i>circZNF148</i> | miR-676-5p                  | 3 |
| <i>circZNF148</i> | miR-6760-3p                 | 1 |
| <i>circZNF148</i> | miR-6760-5p                 | 1 |
| <i>circZNF148</i> | miR-6767-3p                 | 1 |
| <i>circZNF148</i> | miR-6769a-3p                | 1 |
| <i>circZNF148</i> | miR-6769a-5p/6769b-5p       | 1 |
| <i>circZNF148</i> | miR-6770-3p                 | 5 |
| <i>circZNF148</i> | miR-6770-5p                 | 1 |
| <i>circZNF148</i> | miR-6771-3p                 | 1 |
| <i>circZNF148</i> | miR-6771-5p                 | 1 |
| <i>circZNF148</i> | miR-6772-5p                 | 1 |
| <i>circZNF148</i> | miR-6773-3p                 | 1 |
| <i>circZNF148</i> | miR-6776-3p                 | 1 |
| <i>circZNF148</i> | miR-6778-3p                 | 1 |
| <i>circZNF148</i> | miR-6780a-3p                | 1 |
| <i>circZNF148</i> | miR-6782-3p                 | 1 |

|                   |                     |   |
|-------------------|---------------------|---|
| <i>circZNF148</i> | miR-6784-3p/6862-3p | 3 |
| <i>circZNF148</i> | miR-6786-5p         | 1 |
| <i>circZNF148</i> | miR-6787-3p         | 1 |
| <i>circZNF148</i> | miR-6791-3p/6829-3p | 1 |
| <i>circZNF148</i> | miR-6792-5p         | 4 |
| <i>circZNF148</i> | miR-6793-3p         | 1 |
| <i>circZNF148</i> | miR-6793-5p         | 1 |
| <i>circZNF148</i> | miR-6799-5p         | 1 |
| <i>circZNF148</i> | miR-6800-5p         | 3 |
| <i>circZNF148</i> | miR-6801-5p         | 1 |
| <i>circZNF148</i> | miR-6802-5p         | 3 |
| <i>circZNF148</i> | miR-6808-3p         | 1 |
| <i>circZNF148</i> | miR-6811-3p         | 3 |
| <i>circZNF148</i> | miR-6814-5p         | 1 |
| <i>circZNF148</i> | miR-6815-5p/6865-5p | 4 |
| <i>circZNF148</i> | miR-6816-3p         | 1 |
| <i>circZNF148</i> | miR-6818-3p         | 1 |
| <i>circZNF148</i> | miR-6818-5p         | 1 |
| <i>circZNF148</i> | miR-6819-3p/6877-3p | 1 |
| <i>circZNF148</i> | miR-6820-5p         | 4 |
| <i>circZNF148</i> | miR-6823-5p         | 2 |
| <i>circZNF148</i> | miR-6830-3p         | 1 |
| <i>circZNF148</i> | miR-6830-5p         | 1 |
| <i>circZNF148</i> | miR-6833-5p         | 1 |
| <i>circZNF148</i> | miR-6834-3p         | 2 |
| <i>circZNF148</i> | miR-6835-5p         | 1 |
| <i>circZNF148</i> | miR-6836-3p         | 4 |
| <i>circZNF148</i> | miR-6841-3p         | 3 |
| <i>circZNF148</i> | miR-6842-3p         | 1 |
| <i>circZNF148</i> | miR-6849-3p         | 1 |
| <i>circZNF148</i> | miR-6852-5p         | 1 |
| <i>circZNF148</i> | miR-6854-3p         | 2 |
| <i>circZNF148</i> | miR-6854-5p         | 1 |
| <i>circZNF148</i> | miR-6858-3p         | 1 |
| <i>circZNF148</i> | miR-6861-3p         | 1 |
| <i>circZNF148</i> | miR-6866-5p         | 1 |
| <i>circZNF148</i> | miR-6867-3p         | 2 |
| <i>circZNF148</i> | miR-6871-3p         | 1 |

|                   |             |   |
|-------------------|-------------|---|
| <i>circZNF148</i> | miR-6872-3p | 1 |
| <i>circZNF148</i> | miR-6873-5p | 1 |
| <i>circZNF148</i> | miR-6874-5p | 1 |
| <i>circZNF148</i> | miR-6878-3p | 2 |
| <i>circZNF148</i> | miR-6879-3p | 1 |
| <i>circZNF148</i> | miR-6880-5p | 4 |
| <i>circZNF148</i> | miR-6881-3p | 1 |
| <i>circZNF148</i> | miR-6881-5p | 1 |
| <i>circZNF148</i> | miR-6882-3p | 2 |
| <i>circZNF148</i> | miR-6883-3p | 1 |
| <i>circZNF148</i> | miR-6885-3p | 1 |
| <i>circZNF148</i> | miR-6888-3p | 1 |
| <i>circZNF148</i> | miR-6888-5p | 5 |
| <i>circZNF148</i> | miR-6889-3p | 1 |
| <i>circZNF148</i> | miR-6890-3p | 2 |
| <i>circZNF148</i> | miR-6890-5p | 1 |
| <i>circZNF148</i> | miR-6892-5p | 1 |
| <i>circZNF148</i> | miR-6894-5p | 1 |
| <i>circZNF148</i> | miR-6895-3p | 1 |
| <i>circZNF148</i> | miR-7-5p    | 2 |
| <i>circZNF148</i> | miR-7106-5p | 1 |
| <i>circZNF148</i> | miR-7108-5p | 6 |
| <i>circZNF148</i> | miR-7109-3p | 2 |
| <i>circZNF148</i> | miR-7109-5p | 1 |
| <i>circZNF148</i> | miR-7111-3p | 1 |
| <i>circZNF148</i> | miR-7112-3p | 1 |
| <i>circZNF148</i> | miR-7114-5p | 1 |
| <i>circZNF148</i> | miR-7153-3p | 2 |
| <i>circZNF148</i> | miR-7154-3p | 1 |
| <i>circZNF148</i> | miR-7155-5p | 1 |
| <i>circZNF148</i> | miR-7156-3p | 2 |
| <i>circZNF148</i> | miR-7158-3p | 3 |
| <i>circZNF148</i> | miR-7158-5p | 1 |
| <i>circZNF148</i> | miR-7159-3p | 1 |
| <i>circZNF148</i> | miR-758-3p  | 1 |
| <i>circZNF148</i> | miR-7641    | 1 |
| <i>circZNF148</i> | miR-765     | 1 |
| <i>circZNF148</i> | miR-766-5p  | 1 |



|                   |              |   |
|-------------------|--------------|---|
| <i>circZNF148</i> | miR-767-3p   | 1 |
| <i>circZNF148</i> | miR-767-5p   | 1 |
| <i>circZNF148</i> | miR-770-5p   | 1 |
| <i>circZNF148</i> | miR-7703     | 1 |
| <i>circZNF148</i> | miR-7706     | 1 |
| <i>circZNF148</i> | miR-7843-3p  | 2 |
| <i>circZNF148</i> | miR-7845-5p  | 1 |
| <i>circZNF148</i> | miR-7846-3p  | 1 |
| <i>circZNF148</i> | miR-7847-3p  | 4 |
| <i>circZNF148</i> | miR-7848-3p  | 1 |
| <i>circZNF148</i> | miR-7852-3p  | 2 |
| <i>circZNF148</i> | miR-7974     | 1 |
| <i>circZNF148</i> | miR-802      | 1 |
| <i>circZNF148</i> | miR-8056     | 1 |
| <i>circZNF148</i> | miR-8060     | 5 |
| <i>circZNF148</i> | miR-8062     | 2 |
| <i>circZNF148</i> | miR-8063     | 2 |
| <i>circZNF148</i> | miR-8065     | 1 |
| <i>circZNF148</i> | miR-8066     | 5 |
| <i>circZNF148</i> | miR-8068     | 1 |
| <i>circZNF148</i> | miR-8069     | 1 |
| <i>circZNF148</i> | miR-8071     | 4 |
| <i>circZNF148</i> | miR-8080     | 1 |
| <i>circZNF148</i> | miR-8083     | 1 |
| <i>circZNF148</i> | miR-8087     | 2 |
| <i>circZNF148</i> | miR-873-5p.1 | 2 |
| <i>circZNF148</i> | miR-873-5p.2 | 1 |
| <i>circZNF148</i> | miR-875-3p   | 2 |
| <i>circZNF148</i> | miR-876-3p   | 3 |
| <i>circZNF148</i> | miR-876-5p   | 2 |
| <i>circZNF148</i> | miR-877-5p   | 1 |
| <i>circZNF148</i> | miR-888-5p   | 1 |
| <i>circZNF148</i> | miR-890      | 2 |
| <i>circZNF148</i> | miR-891b     | 1 |
| <i>circZNF148</i> | miR-892-5p   | 3 |
| <i>circZNF148</i> | miR-892a     | 3 |
| <i>circZNF148</i> | miR-892b     | 3 |
| <i>circZNF148</i> | miR-9-3p     | 1 |

|                   |                                       |   |
|-------------------|---------------------------------------|---|
| <i>circZNF148</i> | miR-922                               | 1 |
| <i>circZNF148</i> | miR-92a-2-5p                          | 1 |
| <i>circZNF148</i> | miR-934                               | 3 |
| <i>circZNF148</i> | miR-936                               | 2 |
| <i>circZNF148</i> | miR-937-5p                            | 1 |
| <i>circZNF148</i> | miR-939-3p                            | 1 |
| <i>circZNF148</i> | miR-95-5p                             | 2 |
| <i>circZNF148</i> | miR-124-3p.1                          | 1 |
| <i>circZNF148</i> | miR-1910-3p/6511a-5p                  | 1 |
| <i>circZNF148</i> | miR-34b-5p/449c-5p                    | 1 |
| <i>circZNF148</i> | miR-3714                              | 1 |
| <i>circZNF148</i> | miR-3910                              | 1 |
| <i>circZNF148</i> | miR-4449                              | 1 |
| <i>circZNF148</i> | miR-4484                              | 1 |
| <i>circZNF148</i> | miR-548an                             | 1 |
| <i>circZNF148</i> | miR-6768-3p                           | 1 |
| <i>circZNF148</i> | miR-940/6808-5p/6893-5p               | 1 |
| <i>circZNF430</i> | let-7a-3p/let-7b-3p/let-7f-1-3p/98-3p | 2 |
| <i>circZNF430</i> | let-7f-2-3p/1185-3p                   | 2 |
| <i>circZNF430</i> | miR-101-5p                            | 1 |
| <i>circZNF430</i> | miR-1199-5p/6751-3p                   | 2 |
| <i>circZNF430</i> | miR-1229-3p                           | 1 |
| <i>circZNF430</i> | miR-1236-3p                           | 2 |
| <i>circZNF430</i> | miR-1251-5p                           | 2 |
| <i>circZNF430</i> | miR-1252-3p                           | 2 |
| <i>circZNF430</i> | miR-1256                              | 2 |
| <i>circZNF430</i> | miR-125a-3p                           | 2 |
| <i>circZNF430</i> | miR-126-5p                            | 1 |
| <i>circZNF430</i> | miR-1275/4665-5p                      | 2 |
| <i>circZNF430</i> | miR-1279                              | 2 |
| <i>circZNF430</i> | miR-1291/6775-3p                      | 1 |
| <i>circZNF430</i> | miR-1301-5p/6502-5p                   | 2 |
| <i>circZNF430</i> | miR-130b-5p                           | 2 |
| <i>circZNF430</i> | miR-146b-3p                           | 1 |
| <i>circZNF430</i> | miR-148b-5p/6874-3p                   | 2 |
| <i>circZNF430</i> | miR-149-5p                            | 2 |
| <i>circZNF430</i> | miR-153-5p                            | 1 |
| <i>circZNF430</i> | miR-181a-3p                           | 2 |

|                   |               |   |
|-------------------|---------------|---|
| <i>circZNF430</i> | miR-186-3p    | 1 |
| <i>circZNF430</i> | miR-188-5p    | 2 |
| <i>circZNF430</i> | miR-1911-3p   | 2 |
| <i>circZNF430</i> | miR-1915-5p   | 2 |
| <i>circZNF430</i> | miR-192-3p    | 1 |
| <i>circZNF430</i> | miR-198       | 2 |
| <i>circZNF430</i> | miR-203a-3p.1 | 1 |
| <i>circZNF430</i> | miR-20b-3p    | 2 |
| <i>circZNF430</i> | miR-2115-3p   | 1 |
| <i>circZNF430</i> | miR-2117      | 2 |
| <i>circZNF430</i> | miR-2909      | 1 |
| <i>circZNF430</i> | miR-29b-1-5p  | 2 |
| <i>circZNF430</i> | miR-3064-3p   | 2 |
| <i>circZNF430</i> | miR-3120-3p   | 2 |
| <i>circZNF430</i> | miR-3123      | 2 |
| <i>circZNF430</i> | miR-3137      | 2 |
| <i>circZNF430</i> | miR-3143      | 2 |
| <i>circZNF430</i> | miR-3158-3p   | 2 |
| <i>circZNF430</i> | miR-3168      | 2 |
| <i>circZNF430</i> | miR-3173-5p   | 1 |
| <i>circZNF430</i> | miR-3177-5p   | 1 |
| <i>circZNF430</i> | miR-3180-5p   | 2 |
| <i>circZNF430</i> | miR-3187-3p   | 2 |
| <i>circZNF430</i> | miR-3193      | 2 |
| <i>circZNF430</i> | miR-325       | 1 |
| <i>circZNF430</i> | miR-328-3p    | 1 |
| <i>circZNF430</i> | miR-330-3p    | 1 |
| <i>circZNF430</i> | miR-330-3p.2  | 1 |
| <i>circZNF430</i> | miR-34b-3p    | 2 |
| <i>circZNF430</i> | miR-34c-3p    | 2 |
| <i>circZNF430</i> | miR-361-5p    | 1 |
| <i>circZNF430</i> | miR-3613-3p   | 2 |
| <i>circZNF430</i> | miR-3646      | 2 |
| <i>circZNF430</i> | miR-3653-3p   | 1 |
| <i>circZNF430</i> | miR-3657      | 2 |
| <i>circZNF430</i> | miR-3658      | 1 |
| <i>circZNF430</i> | miR-3662      | 1 |
| <i>circZNF430</i> | miR-3667-5p   | 2 |

|                   |                           |   |
|-------------------|---------------------------|---|
| <i>circZNF430</i> | miR-3686                  | 2 |
| <i>circZNF430</i> | miR-3692-5p               | 2 |
| <i>circZNF430</i> | miR-370-3p                | 2 |
| <i>circZNF430</i> | miR-371-5p                | 1 |
| <i>circZNF430</i> | miR-371b-5p/373-5p/616-5p | 1 |
| <i>circZNF430</i> | miR-372-5p                | 1 |
| <i>circZNF430</i> | miR-380-5p/563            | 2 |
| <i>circZNF430</i> | miR-381-3p                | 2 |
| <i>circZNF430</i> | miR-383-5p.1              | 2 |
| <i>circZNF430</i> | miR-3908                  | 2 |
| <i>circZNF430</i> | miR-3912-5p               | 2 |
| <i>circZNF430</i> | miR-3918                  | 2 |
| <i>circZNF430</i> | miR-3919                  | 2 |
| <i>circZNF430</i> | miR-3923                  | 1 |
| <i>circZNF430</i> | miR-3925-3p               | 2 |
| <i>circZNF430</i> | miR-3925-5p               | 2 |
| <i>circZNF430</i> | miR-3934-5p               | 2 |
| <i>circZNF430</i> | miR-3942-5p               | 2 |
| <i>circZNF430</i> | miR-4252                  | 2 |
| <i>circZNF430</i> | miR-4269/6715b-5p         | 2 |
| <i>circZNF430</i> | miR-4274                  | 2 |
| <i>circZNF430</i> | miR-4282                  | 3 |
| <i>circZNF430</i> | miR-4292/6791-5p          | 1 |
| <i>circZNF430</i> | miR-4302                  | 2 |
| <i>circZNF430</i> | miR-4305                  | 2 |
| <i>circZNF430</i> | miR-4308                  | 1 |
| <i>circZNF430</i> | miR-4317                  | 2 |
| <i>circZNF430</i> | miR-4422                  | 1 |
| <i>circZNF430</i> | miR-4435                  | 2 |
| <i>circZNF430</i> | miR-4437                  | 2 |
| <i>circZNF430</i> | miR-4446-3p               | 2 |
| <i>circZNF430</i> | miR-4464/4748             | 3 |
| <i>circZNF430</i> | miR-4468                  | 2 |
| <i>circZNF430</i> | miR-4480                  | 1 |
| <i>circZNF430</i> | miR-4482-3p               | 4 |
| <i>circZNF430</i> | miR-4509                  | 1 |
| <i>circZNF430</i> | miR-4511                  | 1 |
| <i>circZNF430</i> | miR-4514/4692             | 2 |

|                   |                          |   |
|-------------------|--------------------------|---|
| <i>circZNF430</i> | miR-4519                 | 2 |
| <i>circZNF430</i> | miR-4524b-3p             | 2 |
| <i>circZNF430</i> | miR-4527/6503-5p         | 2 |
| <i>circZNF430</i> | miR-4645-5p/4673         | 2 |
| <i>circZNF430</i> | miR-4652-3p              | 2 |
| <i>circZNF430</i> | miR-4663                 | 2 |
| <i>circZNF430</i> | miR-4666a-3p             | 2 |
| <i>circZNF430</i> | miR-4667-5p/4700-5p/8089 | 2 |
| <i>circZNF430</i> | miR-4669                 | 2 |
| <i>circZNF430</i> | miR-4684-5p              | 2 |
| <i>circZNF430</i> | miR-4685-5p/6837-5p      | 2 |
| <i>circZNF430</i> | miR-4691-5p/6792-3p      | 2 |
| <i>circZNF430</i> | miR-4712-3p              | 1 |
| <i>circZNF430</i> | miR-4715-3p              | 2 |
| <i>circZNF430</i> | miR-4722-3p/6727-3p      | 1 |
| <i>circZNF430</i> | miR-4729                 | 1 |
| <i>circZNF430</i> | miR-4738-3p              | 1 |
| <i>circZNF430</i> | miR-4742-5p              | 2 |
| <i>circZNF430</i> | miR-4743-3p              | 2 |
| <i>circZNF430</i> | miR-4744                 | 1 |
| <i>circZNF430</i> | miR-4753-3p              | 2 |
| <i>circZNF430</i> | miR-4756-3p              | 2 |
| <i>circZNF430</i> | miR-4761-5p              | 1 |
| <i>circZNF430</i> | miR-4762-5p              | 2 |
| <i>circZNF430</i> | miR-4768-5p/6833-3p      | 2 |
| <i>circZNF430</i> | miR-4769-3p/6817-5p      | 1 |
| <i>circZNF430</i> | miR-4772-5p              | 2 |
| <i>circZNF430</i> | miR-4773                 | 1 |
| <i>circZNF430</i> | miR-4776-3p              | 2 |
| <i>circZNF430</i> | miR-4777-5p              | 2 |
| <i>circZNF430</i> | miR-4789-5p              | 2 |
| <i>circZNF430</i> | miR-4793-5p              | 1 |
| <i>circZNF430</i> | miR-483-3p.1             | 2 |
| <i>circZNF430</i> | miR-483-3p.2             | 2 |
| <i>circZNF430</i> | miR-491-3p               | 1 |
| <i>circZNF430</i> | miR-494-3p               | 2 |
| <i>circZNF430</i> | miR-499a-3p/499b-3p      | 2 |
| <i>circZNF430</i> | miR-5003-3p              | 2 |

|                   |                     |   |
|-------------------|---------------------|---|
| <i>circZNF430</i> | miR-5007-3p         | 2 |
| <i>circZNF430</i> | miR-5009-3p         | 1 |
| <i>circZNF430</i> | miR-500a-5p         | 2 |
| <i>circZNF430</i> | miR-500b-3p         | 1 |
| <i>circZNF430</i> | miR-502-5p          | 2 |
| <i>circZNF430</i> | miR-503-3p          | 1 |
| <i>circZNF430</i> | miR-5088-5p         | 2 |
| <i>circZNF430</i> | miR-513b-3p         | 1 |
| <i>circZNF430</i> | miR-513c-5p/514b-5p | 1 |
| <i>circZNF430</i> | miR-517-5p          | 2 |
| <i>circZNF430</i> | miR-518a-5p/527     | 1 |
| <i>circZNF430</i> | miR-518d-5p/519-5p  | 2 |
| <i>circZNF430</i> | miR-5196-3p         | 1 |
| <i>circZNF430</i> | miR-5197-3p         | 2 |
| <i>circZNF430</i> | miR-5197-5p         | 1 |
| <i>circZNF430</i> | miR-520f-5p         | 2 |
| <i>circZNF430</i> | miR-524-5p          | 2 |
| <i>circZNF430</i> | miR-525-5p          | 2 |
| <i>circZNF430</i> | miR-539-5p          | 3 |
| <i>circZNF430</i> | miR-548ao-3p        | 2 |
| <i>circZNF430</i> | miR-548at-5p        | 1 |
| <i>circZNF430</i> | miR-548aw           | 1 |
| <i>circZNF430</i> | miR-548b-3p         | 1 |
| <i>circZNF430</i> | miR-548c-3p         | 2 |
| <i>circZNF430</i> | miR-548g-3p         | 2 |
| <i>circZNF430</i> | miR-548s            | 2 |
| <i>circZNF430</i> | miR-552-3p          | 2 |
| <i>circZNF430</i> | miR-5571-5p         | 2 |
| <i>circZNF430</i> | miR-5584-3p         | 2 |
| <i>circZNF430</i> | miR-561-3p          | 1 |
| <i>circZNF430</i> | miR-561-5p          | 1 |
| <i>circZNF430</i> | miR-5680            | 1 |
| <i>circZNF430</i> | miR-5691            | 2 |
| <i>circZNF430</i> | miR-5696            | 1 |
| <i>circZNF430</i> | miR-5697            | 1 |
| <i>circZNF430</i> | miR-579-3p          | 1 |
| <i>circZNF430</i> | miR-580-3p          | 1 |
| <i>circZNF430</i> | miR-588             | 2 |

|                   |                             |   |
|-------------------|-----------------------------|---|
| <i>circZNF430</i> | miR-592                     | 1 |
| <i>circZNF430</i> | miR-593-3p                  | 2 |
| <i>circZNF430</i> | miR-599                     | 1 |
| <i>circZNF430</i> | miR-605-5p                  | 2 |
| <i>circZNF430</i> | miR-6074                    | 2 |
| <i>circZNF430</i> | miR-627-3p                  | 4 |
| <i>circZNF430</i> | miR-628-3p                  | 1 |
| <i>circZNF430</i> | miR-628-5p                  | 2 |
| <i>circZNF430</i> | miR-637                     | 2 |
| <i>circZNF430</i> | miR-6499-3p                 | 2 |
| <i>circZNF430</i> | miR-6502-3p                 | 2 |
| <i>circZNF430</i> | miR-6511-3p                 | 1 |
| <i>circZNF430</i> | miR-6515-3p                 | 2 |
| <i>circZNF430</i> | miR-653-5p                  | 1 |
| <i>circZNF430</i> | miR-654-3p                  | 2 |
| <i>circZNF430</i> | miR-664a-5p/4794            | 2 |
| <i>circZNF430</i> | miR-6729-3p                 | 2 |
| <i>circZNF430</i> | miR-6733-3p                 | 2 |
| <i>circZNF430</i> | miR-6742-3p                 | 1 |
| <i>circZNF430</i> | miR-6747-3p                 | 1 |
| <i>circZNF430</i> | miR-6749-3p                 | 2 |
| <i>circZNF430</i> | miR-6750-3p                 | 1 |
| <i>circZNF430</i> | miR-6751-5p/6803-5p         | 2 |
| <i>circZNF430</i> | miR-6752-5p/6842-5p/7110-5p | 2 |
| <i>circZNF430</i> | miR-6753-3p/7107-3p         | 2 |
| <i>circZNF430</i> | miR-6753-5p                 | 2 |
| <i>circZNF430</i> | miR-6755-5p                 | 1 |
| <i>circZNF430</i> | miR-6758-3p                 | 1 |
| <i>circZNF430</i> | miR-676-5p                  | 2 |
| <i>circZNF430</i> | miR-6777-3p                 | 2 |
| <i>circZNF430</i> | miR-6782-3p                 | 1 |
| <i>circZNF430</i> | miR-6784-3p/6862-3p         | 1 |
| <i>circZNF430</i> | miR-6785-3p                 | 2 |
| <i>circZNF430</i> | miR-6802-3p                 | 1 |
| <i>circZNF430</i> | miR-6809-3p                 | 2 |
| <i>circZNF430</i> | miR-6814-5p                 | 1 |
| <i>circZNF430</i> | miR-6818-3p                 | 2 |
| <i>circZNF430</i> | miR-6822-3p                 | 2 |

|                   |                    |   |
|-------------------|--------------------|---|
| <i>circZNF430</i> | miR-6835-5p        | 2 |
| <i>circZNF430</i> | miR-6841-3p        | 2 |
| <i>circZNF430</i> | miR-6841-5p        | 1 |
| <i>circZNF430</i> | miR-6851-3p        | 1 |
| <i>circZNF430</i> | miR-6852-5p        | 1 |
| <i>circZNF430</i> | miR-6882-5p        | 1 |
| <i>circZNF430</i> | miR-6883-3p        | 1 |
| <i>circZNF430</i> | miR-6895-3p        | 2 |
| <i>circZNF430</i> | miR-7-3p           | 1 |
| <i>circZNF430</i> | miR-7109-5p        | 2 |
| <i>circZNF430</i> | miR-7113-5p        | 2 |
| <i>circZNF430</i> | miR-7155-5p        | 2 |
| <i>circZNF430</i> | miR-7159-3p        | 4 |
| <i>circZNF430</i> | miR-7160-5p        | 2 |
| <i>circZNF430</i> | miR-758-5p         | 2 |
| <i>circZNF430</i> | miR-760            | 2 |
| <i>circZNF430</i> | miR-7641           | 2 |
| <i>circZNF430</i> | miR-766-3p         | 2 |
| <i>circZNF430</i> | miR-7976           | 1 |
| <i>circZNF430</i> | miR-8074           | 2 |
| <i>circZNF430</i> | miR-8077           | 2 |
| <i>circZNF430</i> | miR-93-3p          | 2 |
| <i>circZNF430</i> | miR-939-3p         | 1 |
| <i>circZNF430</i> | miR-942-5p         | 2 |
| <i>circZNF430</i> | miR-944            | 1 |
| <i>circZNF91</i>  | miR-1-3p/206       | 1 |
| <i>circZNF91</i>  | miR-1203           | 1 |
| <i>circZNF91</i>  | miR-122-5p         | 1 |
| <i>circZNF91</i>  | miR-1231           | 1 |
| <i>circZNF91</i>  | miR-1233-3p        | 1 |
| <i>circZNF91</i>  | miR-1255a/1255b-5p | 1 |
| <i>circZNF91</i>  | miR-1267           | 1 |
| <i>circZNF91</i>  | miR-127-5p         | 1 |
| <i>circZNF91</i>  | miR-1273d          | 1 |
| <i>circZNF91</i>  | miR-1273f          | 1 |
| <i>circZNF91</i>  | miR-1276           | 1 |
| <i>circZNF91</i>  | miR-1288-3p        | 1 |
| <i>circZNF91</i>  | miR-129-3p         | 1 |



|                  |                    |   |
|------------------|--------------------|---|
| <i>circZNF91</i> | miR-1298-3p        | 1 |
| <i>circZNF91</i> | miR-1299           | 2 |
| <i>circZNF91</i> | miR-1303           | 1 |
| <i>circZNF91</i> | miR-137            | 1 |
| <i>circZNF91</i> | miR-139-5p         | 1 |
| <i>circZNF91</i> | miR-140-3p.1       | 1 |
| <i>circZNF91</i> | miR-143-3p         | 1 |
| <i>circZNF91</i> | miR-146-5p         | 1 |
| <i>circZNF91</i> | miR-146b-3p        | 1 |
| <i>circZNF91</i> | miR-15a-3p         | 1 |
| <i>circZNF91</i> | miR-190a-3p        | 1 |
| <i>circZNF91</i> | miR-211-3p         | 1 |
| <i>circZNF91</i> | miR-214-3p/3619-5p | 1 |
| <i>circZNF91</i> | miR-217            | 1 |
| <i>circZNF91</i> | miR-2392           | 1 |
| <i>circZNF91</i> | miR-2909           | 1 |
| <i>circZNF91</i> | miR-298            | 1 |
| <i>circZNF91</i> | miR-299-3p         | 1 |
| <i>circZNF91</i> | miR-3117-5p        | 1 |
| <i>circZNF91</i> | miR-3120-3p        | 1 |
| <i>circZNF91</i> | miR-3123           | 1 |
| <i>circZNF91</i> | miR-3126-3p        | 1 |
| <i>circZNF91</i> | miR-3130-3p        | 1 |
| <i>circZNF91</i> | miR-3148           | 1 |
| <i>circZNF91</i> | miR-3150b-3p       | 1 |
| <i>circZNF91</i> | miR-3162-5p        | 1 |
| <i>circZNF91</i> | miR-3165           | 1 |
| <i>circZNF91</i> | miR-3169           | 1 |
| <i>circZNF91</i> | miR-3173-5p        | 1 |
| <i>circZNF91</i> | miR-3187-3p        | 1 |
| <i>circZNF91</i> | miR-367-5p         | 1 |
| <i>circZNF91</i> | miR-3677-5p        | 1 |
| <i>circZNF91</i> | miR-3688-5p        | 1 |
| <i>circZNF91</i> | miR-3690           | 1 |
| <i>circZNF91</i> | miR-3691-5p        | 1 |
| <i>circZNF91</i> | miR-378-3p         | 1 |
| <i>circZNF91</i> | miR-3920           | 1 |
| <i>circZNF91</i> | miR-3925-5p        | 1 |

|                  |                          |   |
|------------------|--------------------------|---|
| <i>circZNF91</i> | miR-4254                 | 1 |
| <i>circZNF91</i> | miR-4292/6791-5p         | 1 |
| <i>circZNF91</i> | miR-4308                 | 1 |
| <i>circZNF91</i> | miR-4311                 | 1 |
| <i>circZNF91</i> | miR-432-3p               | 1 |
| <i>circZNF91</i> | miR-4433b-3p             | 1 |
| <i>circZNF91</i> | miR-4435                 | 1 |
| <i>circZNF91</i> | miR-4474-3p              | 1 |
| <i>circZNF91</i> | miR-4481/4745-5p         | 1 |
| <i>circZNF91</i> | miR-4491/4657            | 1 |
| <i>circZNF91</i> | miR-4496                 | 1 |
| <i>circZNF91</i> | miR-4501                 | 1 |
| <i>circZNF91</i> | miR-4515                 | 1 |
| <i>circZNF91</i> | miR-4517                 | 1 |
| <i>circZNF91</i> | miR-452-5p/892-3p        | 1 |
| <i>circZNF91</i> | miR-4520-3p              | 1 |
| <i>circZNF91</i> | miR-4529-5p              | 1 |
| <i>circZNF91</i> | miR-4638-3p              | 1 |
| <i>circZNF91</i> | miR-4684-5p              | 1 |
| <i>circZNF91</i> | miR-4687-5p              | 1 |
| <i>circZNF91</i> | miR-4700-3p              | 1 |
| <i>circZNF91</i> | miR-4708-3p              | 1 |
| <i>circZNF91</i> | miR-4708-5p              | 1 |
| <i>circZNF91</i> | miR-4712-3p              | 1 |
| <i>circZNF91</i> | miR-4729                 | 1 |
| <i>circZNF91</i> | miR-4740-5p              | 1 |
| <i>circZNF91</i> | miR-4759                 | 1 |
| <i>circZNF91</i> | miR-4764-5p              | 1 |
| <i>circZNF91</i> | miR-4768-5p/6833-3p      | 1 |
| <i>circZNF91</i> | miR-4782-5p/5706         | 2 |
| <i>circZNF91</i> | miR-4793-3p              | 1 |
| <i>circZNF91</i> | miR-4796-3p              | 1 |
| <i>circZNF91</i> | miR-489-3p               | 1 |
| <i>circZNF91</i> | miR-5000-3p              | 1 |
| <i>circZNF91</i> | miR-509-3-5p/509-5p/4418 | 1 |
| <i>circZNF91</i> | miR-513b-3p              | 1 |
| <i>circZNF91</i> | miR-514a-3p              | 1 |
| <i>circZNF91</i> | miR-516b-5p              | 2 |

|                  |                 |   |
|------------------|-----------------|---|
| <i>circZNF91</i> | miR-5187-5p     | 1 |
| <i>circZNF91</i> | miR-520f-5p     | 1 |
| <i>circZNF91</i> | miR-541-5p      | 1 |
| <i>circZNF91</i> | miR-548s        | 1 |
| <i>circZNF91</i> | miR-5571-5p     | 1 |
| <i>circZNF91</i> | miR-5583-3p     | 1 |
| <i>circZNF91</i> | miR-5691        | 1 |
| <i>circZNF91</i> | miR-575/4676-5p | 1 |
| <i>circZNF91</i> | miR-583         | 1 |
| <i>circZNF91</i> | miR-588         | 1 |
| <i>circZNF91</i> | miR-589-5p      | 1 |
| <i>circZNF91</i> | miR-606         | 1 |
| <i>circZNF91</i> | miR-6081        | 1 |
| <i>circZNF91</i> | miR-6083        | 1 |
| <i>circZNF91</i> | miR-6124        | 1 |
| <i>circZNF91</i> | miR-6128        | 1 |
| <i>circZNF91</i> | miR-631/3661    | 1 |
| <i>circZNF91</i> | miR-632/4288    | 1 |
| <i>circZNF91</i> | miR-6505-5p     | 1 |
| <i>circZNF91</i> | miR-651-3p      | 1 |
| <i>circZNF91</i> | miR-654-3p      | 1 |
| <i>circZNF91</i> | miR-663b        | 1 |
| <i>circZNF91</i> | miR-6744-5p     | 1 |
| <i>circZNF91</i> | miR-6757-3p     | 1 |
| <i>circZNF91</i> | miR-6757-5p     | 1 |
| <i>circZNF91</i> | miR-6779-3p     | 1 |
| <i>circZNF91</i> | miR-6809-3p     | 1 |
| <i>circZNF91</i> | miR-6817-3p     | 2 |
| <i>circZNF91</i> | miR-6830-5p     | 1 |
| <i>circZNF91</i> | miR-6845-3p     | 1 |
| <i>circZNF91</i> | miR-6858-3p     | 1 |
| <i>circZNF91</i> | miR-6873-3p     | 2 |
| <i>circZNF91</i> | miR-6874-5p     | 1 |
| <i>circZNF91</i> | miR-6880-5p     | 1 |
| <i>circZNF91</i> | miR-6890-3p     | 1 |
| <i>circZNF91</i> | miR-6894-5p     | 1 |
| <i>circZNF91</i> | miR-7108-5p     | 1 |
| <i>circZNF91</i> | miR-7110-3p     | 2 |

|                  |             |   |
|------------------|-------------|---|
| <i>circZNF91</i> | miR-7154-3p | 1 |
| <i>circZNF91</i> | miR-765     | 1 |
| <i>circZNF91</i> | miR-766-5p  | 1 |
| <i>circZNF91</i> | miR-7843-3p | 1 |
| <i>circZNF91</i> | miR-7976    | 1 |
| <i>circZNF91</i> | miR-8056    | 1 |
| <i>circZNF91</i> | miR-8066    | 1 |
| <i>circZNF91</i> | miR-8069    | 1 |
| <i>circZNF91</i> | miR-8070    | 1 |
| <i>circZNF91</i> | miR-8071    | 1 |
| <i>circZNF91</i> | miR-8083    | 1 |
| <i>circZNF91</i> | miR-891a-3p | 1 |
| <i>circZNF91</i> | miR-922     | 1 |
| <i>circZNF91</i> | miR-942-5p  | 1 |

---

Table of MicroRNA (miRNA) predicted binding sites in AD-associated circRNA sequences. miRNA binding sites were predicted using TargetScan70 software. When multiple isoforms of the same circRNA were predicted to have different number of binding sites for the same miRNA, we selected the greatest number of predicted binding sites to present at the gene-level.
