# Supplementary material
Source: PubMed Central journal article supplement (PMC6858549)
Supplement: NIHMS1537925-supplement-3.pdf [file NIHMS1537925-supplement-3.pdf]

## Supplementary Software

|                                                                    |     |
|--------------------------------------------------------------------|-----|
| STAR RNA-seq Data Alignment .....                                  | 3   |
| Knight ADRC and DIAN .....                                         | 3   |
| Spike-In Alignment .....                                           | 6   |
| MSBB .....                                                         | 8   |
| Calculating Transcript Integrity Number .....                      | 12  |
| CircRNA Calling .....                                              | 13  |
| DCC and circRNA_finder calling in Knight ADRC and DIAN .....       | 13  |
| DCC Calling in Spike-In .....                                      | 17  |
| DCC Calling in MSBB .....                                          | 17  |
| Salmon Calling of Linear RNAs .....                                | 18  |
| Knight ADRC .....                                                  | 18  |
| MSBB .....                                                         | 19  |
| R Libraries .....                                                  | 21  |
| Dataset Processing and Differential Expression Analyses .....      | 22  |
| Spike-In Processing .....                                          | 22  |
| Knight ADRC .....                                                  | 37  |
| DIAN .....                                                         | 44  |
| MSBB .....                                                         | 52  |
| Regression-Based circRNA Association Independence Analyses .....   | 59  |
| Independence from AD-associated cognate linear mRNA changes .....  | 59  |
| Independence from AD-associated cell-type proportion changes ..... | 64  |
| Differential Expression Meta-Analyses .....                        | 69  |
| Pre-symptomatic Bootstrap Correlation Distribution Analyses .....  | 78  |
| Proportion of Variation Explained Analyses .....                   | 86  |
| ROCC and AUC Analyses .....                                        | 98  |
| Co-expression Network Analyses .....                               | 105 |
| Processing Code .....                                              | 105 |
| Template files .....                                               | 131 |
| R Script .....                                                     | 131 |
| Bash Script .....                                                  | 133 |
| Cluster Processing Script .....                                    | 134 |
| MicroRNA Binding Site Prediction Analyses .....                    | 134 |

Overlap and other calculations.....137

# STAR RNA-seq Data Alignment

## Knight ADRC and DIAN

```
#####
```

```
## Dube et al., 2019 - circRNAs in AD ##
```

```
#####
```

```
##Author: Umber Dube
```

```
##Contact: udube@wustl.edu
```

```
##Code Section: STAR Alignment of RNA-seq Data
```

```
#####Generate STAR Reference files based on Gencode release v26 - GRCh38
```

```
``{bash}
```

```
#!/bin/bash
```

```
# Knight ADRC Parietal
```

```
# Create Star Indices - via Star Manual and Gencode
```

```
# Reference files
```

```
# GRCh38 annotation file - wget
```

```
ftp://ftp.sanger.ac.uk/pub/gencode/Gencode_human/release_26/gencode.v26.primary_assembly.anno  
tation.gtf.gz
```

```
# GRCh38 fasta file - wget
```

```
ftp://ftp.sanger.ac.uk/pub/gencode/Gencode_human/release_26/GRCh38.primary_assembly.genome.f  
a.gz
```

```
#Knight ADRC Parietal Star code 150n reads
```

```
#read length for Knight ADRC Parietal RNASeq as per FastQC is 151, so sjdbOverhang = 150
```

```
mkdir GrCh38_150n
```

```
/home/dubeu/Synapse/STAR-2.5.3a/bin/Linux_x86_64/STAR --runThreadN 22 \
```

```
--runMode genomeGenerate \
```

```
--genomeDir "$(pwd)/GrCh38_150n" \
```

```
--genomeFastaFiles /40/AD/Expression/KnightADRCParietal/06.-
```

```
References/GRCh38.primary_assembly.genome.fa \
```

```
--sjdbGTFfile /40/AD/Expression/KnightADRCParietal/06.-
```

```
References/gencode.v26.primary_assembly.annotation.gtf \
```

```
--sjdbOverhang 150 \
```

```
--outFileNamePrefix "$(pwd)/GrCh38_150n"
```

```
...
```

```

#####Align 3 times: paired, R1, R2
``{bash}
#!/bin/bash

JAVA="/usr/java/jre1.8.0_91/bin/java"
JAVA_OPTS="-Xms4g -Xmx8g -XX:ParallelGCThreads=1 -Djava.io.tmpdir=/data/tmp"
PICARD="/usr/local/genome/picard-2.10.3/picard.jar"

#Example code to run:

##LOAD GENOME FIRST##
#/home/dubeu/Synapse/STAR-2.5.3a/bin/Linux_x86_64/STAR --genomeDir
/40/AD/Expression/KnightADRCParietal/06.-References/GrCh38_150n --runThreadN 22 --genomeLoad
Remove
#/home/dubeu/Synapse/STAR-2.5.3a/bin/Linux_x86_64/STAR --genomeDir
/40/AD/Expression/KnightADRCParietal/06.-References/GrCh38_150n --runThreadN 22 --genomeLoad
LoadAndExit

#parallel -j 5 --load 50 ./Alignment_KnightADRCParietal.sh {} :::
/40/AD/Expression/KnightADRCParietal/02.-Processed_Data/01.HiSeq/02.-merge_Bam/*.bam

bam=${1##*/}

participant=`echo $bam | rev | cut -d. -f2- | rev`

logfile=log.${participant}.txt

mate1=${participant}_R1.fastq           #adding _R1.fastq to name file
mate2=${participant}_R2.fastq           #adding _R2.fastq to name file

star_out_dir=/home/dubeu/Synapse/align_individuals/align1 #set it the output directory

#collecting the adapter sequencing for each individual

R1=`grep -w $participant /40/AD/Expression/KnightADRCParietal/02.-Processed_Data/01.HiSeq/03.-
STAR_align/HiSeq_adapter_post_swap.txt | awk '{print $2}`
R2=`grep -w $participant /40/AD/Expression/KnightADRCParietal/02.-Processed_Data/01.HiSeq/03.-
STAR_align/HiSeq_adapter_post_swap.txt | awk '{print $3}`

echo "Convert $file to fastq format"
echo "$participant -> ($mate1, $mate2)"

```

```
java -jar $PICARD RevertSam VALIDATION_STRINGENCY=LENIENT QUIET=true COMPRESSION_LEVEL=0  
I="{1}" SORT_ORDER=queryname OUTPUT=/dev/stdout | java -jar $PICARD SamToFastq I=/dev/stdin  
FASTQ=$mate1 SECOND_END_FASTQ=$mate2
```

```
# run STAR both mates
```

```
/home/dubeu/Synapse/STAR-2.5.3a/bin/Linux_x86_64/STAR --runThreadN 10 --genomeDir  
/40/AD/Expression/KnightADRCParietal/06.-References/GrCh38_150n --readFilesIn $mate1 $mate2 --  
outSAMtype BAM SortedByCoordinate --outFileNamePrefix  
$star_out_dir/${participant}_circRNA_Align1_ --outSJfilterOverhangMin 15 15 15 15 --  
alignSJoverhangMin 15 --alignSJDBoverhangMin 15 --seedSearchStartLmax 30 --outFilterMultimapNmax  
20 --outFilterScoreMin 1 --outFilterMatchNmin 1 --outFilterMismatchNmax 2 --chimSegmentMin 15 --  
chimScoreMin 15 --chimScoreSeparation 10 --chimJunctionOverhangMin 15 --clip3pAdapterSeq $R1 $R2  
--genomeLoad LoadAndKeep --limitBAMsortRAM 5000000000
```

```
# run STAR R1
```

```
/home/dubeu/Synapse/STAR-2.5.3a/bin/Linux_x86_64/STAR --runThreadN 10 --genomeDir  
/40/AD/Expression/KnightADRCParietal/06.-References/GrCh38_150n --readFilesIn $mate1 --  
outSAMtype None --outFileNamePrefix $star_out_dir/${participant}_${mate1}_circRNA_Align1_ --  
outSJfilterOverhangMin 15 15 15 15 --alignSJoverhangMin 15 --alignSJDBoverhangMin 15 --  
seedSearchStartLmax 30 --outFilterMultimapNmax 20 --outFilterScoreMin 1 --outFilterMatchNmin 1 --  
outFilterMismatchNmax 2 --chimSegmentMin 15 --chimScoreMin 15 --chimScoreSeparation 10 --  
chimJunctionOverhangMin 15 --clip3pAdapterSeq $R1 $R2 --genomeLoad LoadAndKeep --  
limitBAMsortRAM 5000000000
```

```
# run STAR R2
```

```
/home/dubeu/Synapse/STAR-2.5.3a/bin/Linux_x86_64/STAR --runThreadN 10 --genomeDir  
/40/AD/Expression/KnightADRCParietal/06.-References/GrCh38_150n --readFilesIn $mate2 --  
outSAMtype None --outFileNamePrefix $star_out_dir/${participant}_${mate2}_circRNA_Align1_ --  
outSJfilterOverhangMin 15 15 15 15 --alignSJoverhangMin 15 --alignSJDBoverhangMin 15 --  
seedSearchStartLmax 30 --outFilterMultimapNmax 20 --outFilterScoreMin 1 --outFilterMatchNmin 1 --  
outFilterMismatchNmax 2 --chimSegmentMin 15 --chimScoreMin 15 --chimScoreSeparation 10 --  
chimJunctionOverhangMin 15 --clip3pAdapterSeq $R1 $R2 --genomeLoad LoadAndKeep --  
limitBAMsortRAM 5000000000
```

```
/${JAVA} ${JAVA_OPTS} -jar ${PICARD} BuildBamIndex  
I=$star_out_dir/${participant}_circRNA_Align1_Aligned.sortedByCoord.out.bam
```

```
rm $mate1 $mate2
```

```
exit
```

```
##Remove Genome afterwards##
```

```
#!/home/dubeu/Synapse/STAR-2.5.3a/bin/Linux_x86_64/STAR --genomeDir
/40/AD/Expression/KnightADRCParietal/06.-References/GrCh38_150n --runThreadN 22 --genomeLoad
Remove
```

```
...
```

### Spike-In Alignment

```
JAVA="/scratch/budde/GATK_pipeline/Programs/jre1.8.0_91/bin/java"
JAVA_OPTS="-Xms4g -Xmx8g -XX:ParallelGCThreads=4 -Djava.io.tmpdir=/data/tmp"
PICARD="/scratch/dubeu/SPIKEIN/REF/picard-2.10.3/picard.jar"
```

### ##Generate STAR INDEX

```
#!/home/dubeu/Synapse/STAR-2.5.3a/bin/Linux_x86_64/STAR --runThreadN 22 --runMode
genomeGenerate --genomeDir "$(pwd)/SPIKEIN_150n" --genomeFastaFiles
/40/AD/Expression/2017_03_MendelianVsSporadics/06.-References/spike-in/ERCC92b.fa --sjdbGTFfile
/40/AD/Expression/2017_03_MendelianVsSporadics/06.-References/spike-in/ERCC92b.gtf --
sjdbOverhang 150 --outFileNamePrefix "$(pwd)/SPIKEIN_150n"
```

### #Example code to run

```
cd /scratch/dubeu/SPIKEIN/
```

```
if [[ ! -f ${BAMFILE##*/} ]] ; then
    exit
fi
```

```
bam=${BAMFILE##*/}
```

```
subject=`echo $bam | rev | cut -d. -f2- | rev`
```

```
logfile=log.${subject}.txt #add log.txt
```

```
mate1=${subject}_R1.fastq #adding _R1.fastq to name file:
```

```
mate2=${subject}_R2.fastq #adding _R2.fastq to name file:
```

```
star_out_dir=/scratch/dubeu/SPIKEIN/align_individuals #set it the output directory
```

### #collecting the adapter sequencing for each individual

```
R1=`grep -w $subject /scratch/dubeu/SPIKEIN/REF/HiSeq_adapter.txt | awk '{print $2}`
```

```
R2=`grep -w $subject /scratch/dubeu/SPIKEIN/REF/HiSeq_adapter.txt | awk '{print $3}`
```

```
echo "Convert $file to fastq format"
```

```
echo "$subject -> ($mate1, $mate2)"
```

```
if [[ -f $mate1 ]] ; then
```

```
exit
fi
```

```
if [[ -f $mate2 ]] ; then
  exit
fi
```

```
`${JAVA}``${JAVA_OPTS}` -jar $PICARD RevertSam VALIDATION_STRINGENCY=LENIENT QUIET=true
COMPRESSION_LEVEL=0 I="$bam" SORT_ORDER=queryname OUTPUT=/dev/stdout | `${JAVA}` -jar
$PICARD SamToFastq I=/dev/stdin FASTQ=$mate1 SECOND_END_FASTQ=$mate2
```

```
rm ${BAMFILE}
```

```
# run STAR
```

```
/scratch/dubeu/SPIKEIN/REF/STAR-2.5.3a/bin/Linux_x86_64/STAR --runThreadN 4 --genomeDir
/scratch/dubeu/SPIKEIN/REF/SPIKEIN_150n --readFilesIn $mate1 $mate2 --outSAMtype BAM
SortedByCoordinate --outFileNamePrefix $star_out_dir/${subject}_circRNA_Align1_SPIKEIN_ --
outSJfilterOverhangMin 15 15 15 15 --alignSJoverhangMin 15 --alignSJDBoverhangMin 15 --
seedSearchStartLmax 30 --outFilterMultimapNmax 20 --outFilterScoreMin 1 --outFilterMatchNmin 1 --
outFilterMismatchNmax 2 --chimSegmentMin 15 --chimScoreMin 15 --chimScoreSeparation 10 --
chimJunctionOverhangMin 15 --clip3pAdapterSeq $R1 $R2 --genomeLoad LoadAndKeep --
limitBAMsortRAM 5000000000 --alignTranscriptsPerReadNmax 100000
```

```
/scratch/dubeu/SPIKEIN/REF/STAR-2.5.3a/bin/Linux_x86_64/STAR --runThreadN 4 --genomeDir
/scratch/dubeu/SPIKEIN/REF/SPIKEIN_150n --readFilesIn $mate1 --outSAMtype None --
outFileNamePrefix $star_out_dir/${subject}_${mate1}_circRNA_Align1_SPIKEIN_ --
outSJfilterOverhangMin 15 15 15 15 --alignSJoverhangMin 15 --alignSJDBoverhangMin 15 --
seedSearchStartLmax 30 --outFilterMultimapNmax 20 --outFilterScoreMin 1 --outFilterMatchNmin 1 --
outFilterMismatchNmax 2 --chimSegmentMin 15 --chimScoreMin 15 --chimScoreSeparation 10 --
chimJunctionOverhangMin 15 --clip3pAdapterSeq $R1 $R2 --genomeLoad LoadAndKeep --
limitBAMsortRAM 5000000000 --alignTranscriptsPerReadNmax 100000
```

```
rm $mate1
```

```
/scratch/dubeu/SPIKEIN/REF/STAR-2.5.3a/bin/Linux_x86_64/STAR --runThreadN 4 --genomeDir
/scratch/dubeu/SPIKEIN/REF/SPIKEIN_150n --readFilesIn $mate2 --outSAMtype None --
outFileNamePrefix $star_out_dir/${subject}_${mate2}_circRNA_Align1_SPIKEIN_ --
outSJfilterOverhangMin 15 15 15 15 --alignSJoverhangMin 15 --alignSJDBoverhangMin 15 --
seedSearchStartLmax 30 --outFilterMultimapNmax 20 --outFilterScoreMin 1 --outFilterMatchNmin 1 --
outFilterMismatchNmax 2 --chimSegmentMin 15 --chimScoreMin 15 --chimScoreSeparation 10 --
chimJunctionOverhangMin 15 --clip3pAdapterSeq $R1 $R2 --genomeLoad LoadAndKeep --
limitBAMsortRAM 5000000000 --alignTranscriptsPerReadNmax 100000
```

```

rm $mate2

cd /scratch/dubeu/SPIKEIN/align_individuals

${JAVA} ${JAVA_OPTS} -jar ${PICARD} BuildBamIndex
I=$star_out_dir/${subject}_circRNA_Align1_SPIKEIN_Aligned.sortedByCoord.out.bam

exit
MSBB
#####
## Dube et al., 2019 - circRNAs in AD ##
#####

##Author: Umber Dube
##Contact: udube@wustl.edu

##Code Section: STAR Alignment of RNA-seq Data

#####Generate STAR Reference files based on Gencode release v26 - GRCh38
``{bash}
#!/bin/bash

# MSBB

# Create Star Indices - via Star Manual and Gencode
# Reference files
# GRCh38 annotation file - wget
ftp://ftp.sanger.ac.uk/pub/gencode/Gencode_human/release_26/gencode.v26.primary_assembly.anno
tation.gtf.gz
# GRCh38 fasta file - wget
ftp://ftp.sanger.ac.uk/pub/gencode/Gencode_human/release_26/GRCh38.primary_assembly.genome.f
a.gz

#read length for MSBB RNASeq is 101, so sjdbOverhang = 100

mkdir GrCh38_100n

/home/dubeu/Synapse/STAR-2.5.3a/bin/Linux_x86_64/STAR --runThreadN 22 \
--runMode genomeGenerate \
--genomeDir "$(pwd)/GrCh38_100n" \
--genomeFastaFiles /40/AD/Expression/AMP_AD/06.-References/GRCh38.primary_assembly.genome.fa
\

```



```

--sjdbGTFfile /40/AD/Expression/AMP_AD/06.-
References/gencode.v26.primary_assembly.annotation.gtf \
--sjdbOverhang 100 \
--outFileNamePrefix "$(pwd)/GrCh38_100n"

#####Unalign, merge, and align MSBB
``{bash}
#!/bin/bash

JAVA="/usr/java/jre1.8.0_91/bin/java"
JAVA_OPTS="-Xms4g -Xmx8g -XX:ParallelGCThreads=1 -Djava.io.tmpdir=/data/tmp"
PICARD="/usr/local/genome/picard-2.10.3/picard.jar"

#Prior to runs, navigate to directory and load the genome index using STAR#
#Check to see if it is already loaded -> /home/dubeu/Synapse/STAR-2.5.3a/bin/Linux_x86_64/STAR --
genomeDir /40/AD/Expression/AMP_AD/06.-References/GrCh38_100n --runThreadN 22 --genomeLoad
Remove
#Verify it has loaded into memory - ipcs
#/home/dubeu/Synapse/STAR-2.5.3a/bin/Linux_x86_64/STAR --genomeDir
/40/AD/Expression/AMP_AD/06.-References/GrCh38_100n --runThreadN 22 --genomeLoad
LoadAndExit

#Example code to run
#parallel -j 50 --delay 120 --load 50 ./ReAlignAMP_AD_STAR1Align.sh {} :::
/30/AD/Expression/Public_Datasets/AMP/Mount_Sinai_RNA-
seq/2016.12.release/sequences/BM44/*.bam

bam=${1##*/}

path="$(dirname "$1")"

partial=${bam##*/} #file is named as an example
BM_10_755.unmapped.fq

subject=`echo $partial | rev | cut -d. -f5- | rev` #BM_10_755

bam_final="$path/$bam"

fastq_final="$(ls "$path"/${subject}.unmapped*)"

mkdir /home/dubeu/Synapse/AMP_AD/Revert/${subject}

#cp "${fastq_temp}" /home/dubeu/Synapse/AMP_AD/Revert/${subject}/

```

```
#mv "/home/dubeu/Synapse/AMP_AD/Revert/${subject}/${subject}.unmapped"*
/home/dubeu/Synapse/AMP_AD/Revert/${subject}/${subject}.unmapped.fq.gz

#fastq_final="/home/dubeu/Synapse/AMP_AD/Revert/${subject}/${subject}.unmapped.fq.gz"

#Extract from @RG ID:BM_22_53 PL:ILLUMINA PU:HiSeq2500 LB:BM_22_53 DS:rnaseq
SM:BM_22_53 CN:MSSM
```

```
ID="$(samtools view -H "$bam_final" | grep '@RG' | grep -oP '(?<=ID:)[^\t]*)"
PU="$(samtools view -H "$bam_final" | grep '@RG' | grep -oP '(?<=PU:)[^\t]*)"
PL="$(samtools view -H "$bam_final" | grep '@RG' | grep -oP '(?<=PL:)[^\t]*)"
LB="$(samtools view -H "$bam_final" | grep '@RG' | grep -oP '(?<=LB:)[^\t]*)"
DS="$(samtools view -H "$bam_final" | grep '@RG' | grep -oP '(?<=DS:)[^\t]*)"
SM="$(samtools view -H "$bam_final" | grep '@RG' | grep -oP '(?<=SM:)[^\t]*)"
CN="$(samtools view -H "$bam_final" | grep '@RG' | grep -oP '(?<=CN:)[^\t]*)"
ID="$(samtools view -H "$bam_final" | grep '@RG' | grep -oP '(?<=ID:)[^\t]*)"
```

```
# Following GATK tutorial - http://gatkforums.broadinstitute.org/firecloud/discussion/6484/
```

```
#Convert unmapped fastq to unaligned bam
```

```
java -Xmx8G -jar ${PICARD} FastqToSam \
    FASTQ="$fastq_final" \
    OUTPUT="/home/dubeu/Synapse/AMP_AD/Revert/${subject}/${subject}_revert_unmapped.ba
m" \
    READ_GROUP_NAME=${ID} \
    PLATFORM=${PL} \
    PLATFORM_UNIT=${PU} \
    LIBRARY_NAME=${LB} \
    DESCRIPTION=${DS} \
    SAMPLE_NAME=${SM} \
    SEQUENCING_CENTER=${CN}
```

```
#Convert mapped bam to unaligned bam
```

```
# To determine what attributes to clear, use "samtools view BM_22_53.accepted_hits.sort.coord.bam |
cut -f 12- | tr '\t' '\n' | cut -d ':' -f 1 | awk '{ if(!x[$1]++) { print } }'"
```

```
java -Xmx8G -jar ${PICARD} RevertSam \
    I="$bam_final" \
    O="/home/dubeu/Synapse/AMP_AD/Revert/${subject}/${subject}_revert_mapped.bam" \
    SANITIZE=true \
    MAX_DISCARD_FRACTION=0.005 \
```

```

ATTRIBUTE_TO_CLEAR=NH \
ATTRIBUTE_TO_CLEAR=HI \
ATTRIBUTE_TO_CLEAR=nM \
ATTRIBUTE_TO_CLEAR=AS \
ATTRIBUTE_TO_CLEAR=XS \
SORT_ORDER=queryname \
RESTORE_ORIGINAL_QUALITIES=true \
REMOVE_DUPLICATE_INFORMATION=true \
REMOVE_ALIGNMENT_INFORMATION=true

#Merge bam files together

java -Xmx8G -jar ${PICARD} MergeSamFiles \
    I="/home/dubeu/Synapse/AMP_AD/Revert/${subject}/${subject}_revert_unmapped.bam" \
    I="/home/dubeu/Synapse/AMP_AD/Revert/${subject}/${subject}_revert_mapped.bam" \
    O="/home/dubeu/Synapse/AMP_AD/Revert/${subject}/${subject}_revert_final.bam" \
    SORT_ORDER=queryname

rm /home/dubeu/Synapse/AMP_AD/Revert/${subject}/*_revert_unmapped.bam
rm /home/dubeu/Synapse/AMP_AD/Revert/${subject}/*_revert_mapped.bam

exit

#Align with Star while converting BAM on the fly
# via - http://gatkforums.broadinstitute.org/gatk/discussion/6483

#Set Star Output directory

star_out_dir=/home/dubeu/Synapse/AMP_AD/align_individuals/BM_10 #set it the output directory

## Will use generic Illumina adapter sequence for trimming from
(https://support.illumina.com/bulletins/2016/12/what-sequences-do-i-use-for-adapter-trimming.html)

R1="AGATCGGAAGAGCACACGTCTGAACTCCAGTCA"

#conversion to fastq

# run STAR Align 1
#convert to fastq on the fly
/home/dubeu/Synapse/STAR-2.5.3a/bin/Linux_x86_64/STAR --runThreadN 10 --genomeDir
/40/AD/Expression/AMP_AD/06.-References/GrCh38_100n --readFilesIn <(${JAVA} -
Dsamjdk.buffer_size=131072 \
    -Dsamjdk.compression_level=1 \
    -XX:GCTimeLimit=50 \

```

```

-XX:GCHeapFreeLimit=10 \
-Xmx128m \
-jar ${PICARD} SamToFastq \
l="/home/dubeu/Synapse/AMP_AD/Revert/${subject}/${subject}_revert_final.bam" \
FASTQ=/dev/stdout) --outSAMtype BAM SortedByCoordinate --outFileNamePrefix
$star_out_dir/${subject}_ --outSJfilterOverhangMin 15 15 15 15 --alignSJoverhangMin 15 --
alignSJDBoverhangMin 15 --seedSearchStartLmax 30 --outFilterMultimapNmax 20 --outFilterScoreMin 1
--outFilterMatchNmin 1 --outFilterMismatchNmax 2 --chimSegmentMin 15 --chimScoreMin 15 --
chimScoreSeparation 10 --chimJunctionOverhangMin 15 --clip3pAdapterSeq ${R1} --genomeLoad
LoadAndKeep --limitBAMsortRAM 30000000000

```

```

${JAVA} ${JAVA_OPTS} -jar ${PICARD} BuildBamIndex
l=$star_out_dir/${subject}_Aligned.sortedByCoord.out.bam

```

```

##Remove Genome afterwards##
#/home/dubeu/Synapse/STAR-2.5.3a/bin/Linux_x86_64/STAR --genomeDir
/40/AD/Expression/AMP_AD/06.-References/GrCh38_100n --runThreadN 22 --genomeLoad Remove

```

```

exit
...

```

## Calculating Transcript Integrity Number

```
#!/bin/bash
```

```
#Example code to run
```

```

#test - parallel -j 1 ./TIN_process.sh {} ::: "/30/AD/Expression/Public_Datasets/AMP/Mount_Sinai_RNA-
seq/2016.12.release/sequences/BM22/hB_RNA_12171.accepted_hits.sort.coord.bam"
#parallel -j 50 --delay 60 --load 35 ./TIN_Process_Parietal.sh {} :::
/home/dubeu/Synapse/align_individuals/align1/*.cram

```

```
#converting bam to fasta
```

```

# Converts .bam file to .cram format using the following reference
REF="/40/AD/Expression/ KnightADRCParietal /06.-References/GRCh38.primary_assembly.genome.fa"

```

```
bamfile=${1##*/}
```

```

partial=${bamfile##*/} #file is named as an example
subject=`echo $partial | rev | cut -d. -f2- | rev`

```

```

samtools view -b -T "${REF}" -@ 20 $1 > $subject.sorted.bam

samtools index $subject.sorted.bam

# perl script from: https://github.com/ExpressionAnalysis/ea-utils/blob/master/clipper/gtf2bed
#./gtf2bed.perl <(grep basic /40/AD/Expression/KnightADRCParietal/06.-
References/gencode.v26.primary_assembly.annotation.gtf) >
gencode.v26.primary_assembly.annotation_basically.bed

#./gtf2bed.perl <(grep basic /40/AD/Expression/ KnightADRCParietal /06.-
References/gencode.v26.primary_assembly.annotation.gtf | grep protein_coding) >
gencode.v26.primary_assembly.annotation_basically_proteinencoding.bed

tin.py -i $subject.sorted.bam -r
gencode.v26.primary_assembly.annotation_basically_proteinencoding.bed

rm $subject.sorted.bam
rm $subject.sorted.bam.bai

exit

CircRNA Calling
DCC and circRNA_finder calling in Knight ADRC and DIAN
#####
## Dube et al., 2019 - circRNAs in AD ##
#####

##Author: Umber Dube
##Contact: udube@wustl.edu

##Code Section: CircRNA Calling using DCC - KnightADRCParietal

####Calling circRNAs using DCC software: refer to tutorial - (https://github.com/dieterich-lab/DCC)

#####Prepare filtering files

.gft format, Genome build 38:
    USCC - Repeat masker
    UCSC - Simple Repeats

    Cat the files together

#####Generate input files

``{bash}

```

```
ls /home/dubeu/Synapse/align_individuals/*_Aligned.sortedByCoord.out.bam > bam_files
```

```
ls /home/dubeu/Synapse/align_individuals/*R1.fastqChimeric.out.junction > mate1
```

```
ls /home/dubeu/Synapse/align_individuals/*R2.fastqChimeric.out.junction > mate2
```

```
ls /home/dubeu/Synapse/align_individuals/*_Chimeric.out.junction > samplesheet  
...
```

```
#####Run DCC
```

```
``{bash}  
/home/dubeu/.local/bin/DCC @DCC_InputFiles/samplesheet -mt1 @DCC_InputFiles/mate1 -mt2  
@DCC_InputFiles/mate2 -T 20 -D -R /40/AD/Expression/KnightADRCParietal/06.-  
References/GRCh38_Repeats_simpleRepeats_RepeatMasker.gtf -an  
/40/AD/Expression/KnightADRCParietal/06.-References/gencode.v26.primary_assembly.annotation.gtf -  
Pi -F -M -Nr 1 1 -fg -G -A /40/AD/Expression/KnightADRCParietal/06.-  
References/GRCh38.primary_assembly.genome.fa -B @DCC_InputFiles/bam_files  
...
```

```
####Calling circRNAs using circRNA_finder software
```

```
``{bash}  
#Run processing command in directory containing STAR alignment output  
./postProcessStarAlignment.pl /home/dubeu/Synapse/align_individuals/align1/  
/home/dubeu/Synapse/circRNA_finder/  
...
```

```
####Check for Correlation between DCC and circRNA_finder software
```

```
``{r}
```

```
#####  
#####  
##### Filter the circRNAs based on linear ratio #####  
#####  
#####
```

```
##Adapted these functions from (https://github.com/dieterich-lab/CircTest) to run in parallel
```

```
circ_max_perc <- function(circ=circ,linear=linear,Nreplicates=3){  
  # convert to vector  
  circ = as.numeric(circ)  
  linear = as.numeric(linear)
```

```

if( length(circ) != length(linear) ){
  stop ('Number of samples in circRNA is not equal to Hostgene.')
}
Ngroups = length(circ)/Nreplicates
# calculate percentage
circ_sum = unname(tapply(circ, (seq_along(1:length(circ))-1) %% Nreplicates, sum ))
linear_sum = unname(tapply(linear, (seq_along(1:length(linear))-1) %% Nreplicates, sum ))
perc = max(circ_sum / (circ_sum+linear_sum),na.rm=T)
return(perc)
}

circFILTER <- function(i, circ, linear, Nreplicates, filter.sample, filter.count, percentage,
circle_description=c(1:3)) {

  del_row=c()

  if ( sum(circ[i,-circle_description]>=filter.count)<filter.sample | circ_max_perc(circ[i,-
circle_description], linear[i,-circle_description],Nreplicates=Nreplicates)<percentage) {
    del_row = c(del_row,i)
  }

  del_row

}

library(parallel)

#Generate the DCC files

##Load in circRNA count data generated by DCC##

circCoordinates_parietalCorr <- read.table("/home/dubeu/Synapse/DCC/CircCoordinates", sep="\t",
header=TRUE, stringsAsFactors = FALSE)
CircCount_parietalCorr <- read.table("/home/dubeu/Synapse/DCC/CircRNACount", sep="\t",
header=TRUE, stringsAsFactors = FALSE)
LinearCount_parietalCorr <- read.table("/home/dubeu/Synapse/DCC/LinearCount", sep="\t",
header=TRUE, stringsAsFactors = FALSE)

##Filter the circRNAs based on linear ratios

RowIndex <- 1:nrow(CircCount_parietalCorr)

```

```

circfiltered <- mclapply(rowIndex, circFILTER, CircCount_parietalCorr, LinearCount_parietalCorr,
Nreplicates = 1, filter.sample = 3, filter.count = 3, percentage = 0.1, mc.cores = 50)

circfiltered <- unlist(Filter(Negate(function(x) is.null(unlist(x))), circfiltered))

CircCount_parietalCorr <- CircCount_parietalCorr[-circfiltered,]

circCoordinates_parietalCorr_filter <- circCoordinates_parietalCorr[-circfiltered,]

##load parietalCorr phenotype / covariate information
coldata_parietalCorr <- read.csv(file="/40/AD/Expression/KnightADRCParietal/03.-
phenotype/Pheno.csv", header=TRUE, na.strings = "NA")

#Set rownames
rownames(coldata_parietalCorr) <- coldata_parietalCorr$ID_RNAseq

parietalCorr_circCalling_correlation <- data.frame()

for (i in rownames(coldata_parietalCorr)) {
circDCC <- cbind(circCoordinates_parietalCorr_filter, CircCount_parietalCorr)
colnames(circDCC) <- gsub("_circRNA_Align1_Chimeric.out.junction","", colnames(circDCC))
circFinder <- read.table(paste0("/home/dubeu/Synapse/circRNA_finder/",gsub("VY.","VY-
",i),"_circRNA_Align1_filteredJunctions.bed"), header=FALSE)
colnames(circFinder) <- c("Chr","Start","End","Score",i,"Strand")
circFinder$Chr <- as.character(circFinder$Chr)
circFinder$Strand <- as.character(circFinder$Strand)
##Update start position
circFinder$Start <- as.numeric(circFinder$Start) + 1
circDCC <- circDCC[,colnames(circFinder)[c(1,2,3,6,5)]]
circCalling_correlation <- merge(circDCC,circFinder, by=c("Chr","Start","End","Strand"))

correlation <- cor.test(circCalling_correlation[,5],circCalling_correlation[,7])

parietalCorr_circCalling_correlation <- rbind(correlation$estimate,parietalCorr_circCalling_correlation)

}

rownames(parietalCorr_circCalling_correlation) <- rownames(coldata_parietalCorr)
colnames(parietalCorr_circCalling_correlation) <- "corr"

summary(parietalCorr_circCalling_correlation)
...

```



## DCC Calling in Spike-In

#Note the absence of N (since this is stranded data)

#Note the -Pi for paired end data

```
/usr/bin/DCC @DCC_InputFiles/samplesheet -mt1 @DCC_InputFiles/mate1 -mt2
@DCC_InputFiles/mate2 -T 20 -D -an /40/AD/Expression/2017_03_MendelianVsSporadics/06.-
References/spike-in/ERCC92b.gtf -Pi -F -M -Nr 1 1 -fg -G -A
```

## DCC Calling in MSBB

```
#####
```

```
## Dube et al., 2019 - circRNAs in AD ##
```

```
#####
```

```
##Author: Umber Dube
```

```
##Contact: udube@wustl.edu
```

```
##Code Section: CircRNA Calling using DCC - MSBB
```

```
#####Call CircRNAs - DCC
```

```
``{bash}
```

```
DCC:
```

```
#Download gtf files from UCSC, combined using cat to form /40/AD/Expression/AMP_AD/06.-
References/GRCh38_Repeats_simpleRepeats_RepeatMasker.gtf
```

```
##Repeat below for all 4 regions of MSBB
```

```
cd /home/dubeu/Synapse/AMP_AD/DCC
```

```
mkdir DCC_InputFiles
```

```
ls /home/dubeu/Synapse/AMP_AD/align_individuals/BM10/*_Aligned.sortedByCoord.out.bam >
```

```
DCC_InputFiles/bam_files
```

```
ls /home/dubeu/Synapse/AMP_AD/align_individuals/BM10/*Chimeric.out.junction >
```

```
DCC_InputFiles/read
```

```
ls /home/dubeu/Synapse/AMP_AD/align_individuals/BM10/*_Chimeric.out.junction >
```

```
DCC_InputFiles/samplesheet
```

```
# - N for non-stranded
```

```
DCC @DCC_InputFiles/samplesheet -mt1 @DCC_InputFiles/read -T 20 -D -N -R
```

```
/40/AD/Expression/AMP_AD/06.-References/GRCh38_Repeats_simpleRepeats_RepeatMasker.gtf -an
```

```
/40/AD/Expression/AMP_AD/06.-References/gencode.v26.primary_assembly.annotation.gtf -F -M -Nr 1
```

```
1 -fg -G -A /40/AD/Expression/AMP_AD/06.-References/GRCh38.primary_assembly.genome.fa -B
```

```
@DCC_InputFiles/bam_files
```

```
``
```

## Salmon Calling of Linear RNAs

### Knight ADRC

```
#####
```

```
## Dube et al., 2019 - circRNAs in AD ##
```

```
#####
```

```
##Author: Umber Dube
```

```
##Contact: udube@wustl.edu
```

```
##Code Section: Linear mRNA Calling using Salmon - Knight ADRC Parietal
```

```
####Calling linear genes using Salmon
```

```
Followed the manual as provided here: salmon
```

```
manual(https://salmon.readthedocs.io/en/latest/salmon.html)
```

```
#####Generate the indices
```

```
Obtained the transcript fasta file from GENCODE V26 as with the STAR alignment above
```

```
#####Generate quasi alignment index
```

```
``{bash}
```

```
/usr/local/genome/salmon-0.8.2/bin/salmon index --gencode -t
```

```
/40/AD/Expression/KnightADRCParietal/06.-References/gencode.v26.transcripts.fa -i
```

```
gencode.v26_salmon_transcripts_index_quasi --type quasi -k 31
```

```
``
```

```
``{bash}
```

```
#!/bin/bash
```

```
JAVA="/usr/java/jre1.8.0_91/bin/java"
```

```
JAVAOPTS="-Xms4g -Xmx8g -XX:ParallelGCThreads=1 -Djava.io.tmpdir=/data/tmp"
```

```
PICARD="/usr/local/genome/picard-2.10.3/picard.jar"
```

```
#Example code to run
```

```
#parallel -j 5 --delay 30 --load 50 ./Salmon_Alignment_quasi.sh {} :::
```

```
/40/AD/Expression/KnightADRCParietal/02.-Processed_Data/01.HISeq/02.-merge_Bam/*.bam
```

```
bam=${1##*/}
```

```
subject=`echo $bam | rev | cut -d. -f2- | rev`
```

```
logfile=log.${subject}.txt
```

```
#add log.txt
```

```
mate1=${subject}_R1.fastq
```

```
#adding _R1.fastq to name file
```

```

mate2=${subject}_R2.fastq                                #adding _R2.fastq to name file

salmon_out_dir=/home/dubeu/Synapse/Salmon/quasi/ #set it the output directory

echo "Convert $file to fastq format"
echo "$subject -> ($mate1, $mate2)"

if [ -d "$salmon_out_dir/${subject}" ]; then
    echo "Already quantified"
    exit
else

    java -jar $PICARD RevertSam VALIDATION_STRINGENCY=LENIENT QUIET=true
    COMPRESSION_LEVEL=0 I="$1" SORT_ORDER=queryname OUTPUT=/dev/stdout | java -jar $PICARD
    SamToFastq I=/dev/stdin FASTQ=$mate1 SECOND_END_FASTQ=$mate2

    mkdir $salmon_out_dir/${subject}/

    /usr/local/genome/salmon-0.8.2/bin/salmon quant -p 10 -i
    /40/AD/Expression/KnightADRCParietal/06.-References/genencode.v26_salmon_transcripts_index_quasi -
    I ISR -1 $mate1 -2 $mate2 -o $salmon_out_dir/${subject}/

    rm $mate1 $mate2

fi

exit

...
MSBB

#####
## Dube et al., 2019 - circRNAs in AD ##
#####

##Author: Umber Dube
##Contact: udube@wustl.edu

##Code Section: Linear mRNA Calling using Salmon - MSBB

####Calling linear genes using Salmon
Followed the manual as provided here: salmon
manual(https://salmon.readthedocs.io/en/latest/salmon.html)

```

```
#####Generate the indices
```

```
Obtained the transcript fasta file from GENCODE V26 as with the STAR alignment above
```

```
#####Generate quasi alignment index
```

```
``{bash}
```

```
/usr/local/genome/salmon-0.8.2/bin/salmon index --gencode -t /40/AD/Expression/AMP_AD/06.-  
References/gencode.v26.transcripts.fa -i gencode.v26_salmon_transcripts_index_quasi --type quasi -k  
31
```

```
``
```

```
``{bash}
```

```
#!/bin/bash
```

```
JAVA="/usr/java/jre1.8.0_91/bin/java"
```

```
JAVAOPTS="-Xms4g -Xmx8g -XX:ParallelGCThreads=1 -Djava.io.tmpdir=/data/tmp"
```

```
PICARD="/usr/local/genome/picard-2.10.3/picard.jar"
```

```
#Example code to run
```

```
#parallel -j 8 --delay 30 --load 40 ./AMP_AD_SalmonQuasi_cram_36.sh {} :::
```

```
/30/AD/Expression/Public_Datasets/AMP/Mount_Sinai_RNA-  
seq/2016.12.release/sequences/BM36/*.bam
```

```
REF="/40/AD/Expression/AMP_AD/06.-References/GRCh38.primary_assembly.genome.fa"
```

```
bam=${1##*/}
```

```
partial=${bam##*/}
```

```
#file is named as an example
```

```
BM_10_755.unmapped.fq
```

```
subject=`echo $partial | rev | cut -d. -f5- | rev` #BM_10_755
```

```
#Set Salmon Output directory
```

```
salmon_out_dir=/home/dubeu/Synapse/AMP_AD/Salmon/quasi/BM36 #set it the output directory
```

```
mate1=${subject}_R1.fastq
```

```
if [ -d "$salmon_out_dir/${subject}" ]; then
```

```
    echo "Already quantified"
```

```
    exit
```

```
else
```

```
samtools view -T "${REF}" -b "/30/AD/Expression/Public_Datasets/AMP/Mount_Sinai_RNA-  
seq/2016.12.release/sequences/Unmapped/BM_36/${subject}_revert_final.cram" | samtools bam2fq -  
> ${subject}_R1.fastq
```

```
mkdir $salmon_out_dir/${subject}/
```

```
/usr/local/genome/salmon-0.8.2/bin/salmon quant -p 10 -i /40/AD/Expression/AMP_AD/06.-  
References/gencode.v26_salmon_transcripts_index_quasi -l U -r $mate1 -o  
$salmon_out_dir/${subject}/
```

```
rm $mate1
```

```
fi
```

```
exit  
...
```

## R Libraries

```
#Parallel Processing
```

```
library("BiocParallel")
```

```
register(MulticoreParam(50))
```

```
#Data processing
```

```
library(dplyr)
```

```
library(data.table)
```

```
#Differential expression analysis
```

```
library("DESeq2")
```

```
#MetaRNASeq
```

```
library(metaRNASeq)
```

```
#For ANCOVA
```

```
library(car)
```

```
library(compute.es)
```

```
library(effects)
```

```
library(multcomp)
```

```
library(pastecs)
```

```
library(WRS2)
```

```
library(VennDiagram)
```

```
#Relative Importance
```

```
library(relaimpo)
```

```
#linear Salmon analysis
library("tximport")
library("readr")
library("tximportData")
```

```
#Plotting
library(gridExtra)
library(cowplot)
library(ggpubr)
library(ggplot2)
```

## Dataset Processing and Differential Expression Analyses

```
#####
## Dube et al., 2019 - circRNAs in AD ##
#####
```

```
##Author: Umber Dube
##Contact: udube@wustl.edu
```

```
##Code Section: KnightADRC Parietal and DIAN Parietal Processing
```

### Spike-In Processing

```
library(parallel)
```

```
#####
#####
##### Filter the circRNAs based on linear ratio #####
#####
#####
```

```
circ_max_perc <- function(circ=circ,linear=linear,Nreplicates=3){
  # convert to vector
  circ = as.numeric(circ)
  linear = as.numeric(linear)
  if( length(circ) != length(linear) ){
    stop ('Number of samples in circRNA is not equal to Hostgene.')
  }
  Ngroups = length(circ)/Nreplicates
  # calculate percentage
  circ_sum = unname(tapply(circ, (seq_along(1:length(circ))-1) %% Nreplicates, sum ))
  linear_sum = unname(tapply(linear, (seq_along(1:length(linear))-1) %% Nreplicates, sum ))
```

```

perc = max(circ_sum / (circ_sum+linear_sum),na.rm=T)
return(perc)
}

```

```

circFILTER <- function(i, circ, linear, Nreplicates, filter.sample, filter.count, percentage,
circle_description=c(1:3)) {

```

```

  del_row=c()

```

```

  if ( sum(circ[i,-circle_description]>=filter.count)<filter.sample | circ_max_perc(circ[i,-
circle_description], linear[i,-circle_description],Nreplicates=Nreplicates)<percentage) {
    del_row = c(del_row,i)
  }

```

```

  del_row

```

```

}

```

```

#####
#####
##### Parietal #####
#####
#####
#####

```

```

circCoordinates_parietal <- read.table("/home/dubeu/Synapse/DCC/CircCoordinates", sep="\t",
header=TRUE, stringsAsFactors = FALSE)

```

```

CircCount_parietal <- read.table("/home/dubeu/Synapse/DCC/CircRNACount", sep="\t", header=TRUE,
stringsAsFactors = FALSE)

```

```

LinearCount_parietal <- read.table("/home/dubeu/Synapse/DCC/LinearCount", sep="\t", header=TRUE,
stringsAsFactors = FALSE)

```

```

nrow(CircCount_parietal)

```

```

### 0 percentage

```

```

##Filter the circRNAs based on linear ratios

```

```

rowIndex <- 1:nrow(CircCount_parietal)

circfiltered <- mclapply(rowIndex, circFILTER, CircCount_parietal, LinearCount_parietal, Nreplicates = 1,
filter.sample = 1, filter.count = 3, percentage = 0, mc.cores = 50)

#remove Null via https://stackoverflow.com/questions/26539441/remove-null-elements-from-list-of-lists/26540063

circfiltered <- unlist(Filter(Negate(function(x) is.null(unlist(x))), circfiltered))

CircCount_parietal_filter <- CircCount_parietal[-circfiltered,]
nrow(CircCount_parietal_filter)

##Filter the circRNAs based on linear ratios

rowIndex <- 1:nrow(CircCount_parietal)

circfiltered <- mclapply(rowIndex, circFILTER, CircCount_parietal, LinearCount_parietal, Nreplicates = 1,
filter.sample = 2, filter.count = 3, percentage = 0, mc.cores = 50)

#remove Null via https://stackoverflow.com/questions/26539441/remove-null-elements-from-list-of-lists/26540063

circfiltered <- unlist(Filter(Negate(function(x) is.null(unlist(x))), circfiltered))

CircCount_parietal_filter <- CircCount_parietal[-circfiltered,]
nrow(CircCount_parietal_filter)

##Filter the circRNAs based on linear ratios

rowIndex <- 1:nrow(CircCount_parietal)

circfiltered <- mclapply(rowIndex, circFILTER, CircCount_parietal, LinearCount_parietal, Nreplicates = 1,
filter.sample = 3, filter.count = 3, percentage = 0, mc.cores = 50)

#remove Null via https://stackoverflow.com/questions/26539441/remove-null-elements-from-list-of-lists/26540063

circfiltered <- unlist(Filter(Negate(function(x) is.null(unlist(x))), circfiltered))

CircCount_parietal_filter <- CircCount_parietal[-circfiltered,]
nrow(CircCount_parietal_filter)

```



```
##Filter the circRNAs based on linear ratios
```

```
rowIndex <- 1:nrow(CircCount_parietal)
```

```
circfiltered <- mclapply(rowIndex, circFILTER, CircCount_parietal, LinearCount_parietal, Nreplicates = 1,  
filter.sample = 4, filter.count = 3, percentage = 0, mc.cores = 50)
```

```
#remove Null via https://stackoverflow.com/questions/26539441/remove-null-elements-from-list-of-lists/26540063
```

```
circfiltered <- unlist(Filter(Negate(function(x) is.null(unlist(x))), circfiltered))
```

```
CircCount_parietal_filter <- CircCount_parietal[-circfiltered,]  
nrow(CircCount_parietal_filter)
```

```
##Filter the circRNAs based on linear ratios
```

```
rowIndex <- 1:nrow(CircCount_parietal)
```

```
circfiltered <- mclapply(rowIndex, circFILTER, CircCount_parietal, LinearCount_parietal, Nreplicates = 1,  
filter.sample = 5, filter.count = 3, percentage = 0, mc.cores = 50)
```

```
#remove Null via https://stackoverflow.com/questions/26539441/remove-null-elements-from-list-of-lists/26540063
```

```
circfiltered <- unlist(Filter(Negate(function(x) is.null(unlist(x))), circfiltered))
```

```
CircCount_parietal_filter <- CircCount_parietal[-circfiltered,]  
nrow(CircCount_parietal_filter)
```

```
### 0.1 percentage
```

```
##Filter the circRNAs based on linear ratios
```

```
rowIndex <- 1:nrow(CircCount_parietal)
```

```
circfiltered <- mclapply(rowIndex, circFILTER, CircCount_parietal, LinearCount_parietal, Nreplicates = 1,  
filter.sample = 0, filter.count = 3, percentage = 0.1, mc.cores = 50)
```

```
#remove Null via https://stackoverflow.com/questions/26539441/remove-null-elements-from-list-of-lists/26540063
```

```
circfiltered <- unlist(Filter(Negate(function(x) is.null(unlist(x))), circfiltered))
```

```
CircCount_parietal_filter <- CircCount_parietal[-circfiltered,]  
nrow(CircCount_parietal_filter)
```

```
##Filter the circRNAs based on linear ratios
```

```
rowIndex <- 1:nrow(CircCount_parietal)
```

```
circfiltered <- mclapply(rowIndex, circFILTER, CircCount_parietal, LinearCount_parietal, Nreplicates = 1,  
filter.sample = 1, filter.count = 3, percentage = 0.1, mc.cores = 50)
```

```
#remove Null via https://stackoverflow.com/questions/26539441/remove-null-elements-from-list-of-lists/26540063
```

```
circfiltered <- unlist(Filter(Negate(function(x) is.null(unlist(x))), circfiltered))
```

```
CircCount_parietal_filter <- CircCount_parietal[-circfiltered,]  
nrow(CircCount_parietal_filter)
```

```
##Filter the circRNAs based on linear ratios
```

```
rowIndex <- 1:nrow(CircCount_parietal)
```

```
circfiltered <- mclapply(rowIndex, circFILTER, CircCount_parietal, LinearCount_parietal, Nreplicates = 1,  
filter.sample = 2, filter.count = 3, percentage = 0.1, mc.cores = 50)
```

```
#remove Null via https://stackoverflow.com/questions/26539441/remove-null-elements-from-list-of-lists/26540063
```

```
circfiltered <- unlist(Filter(Negate(function(x) is.null(unlist(x))), circfiltered))
```

```
CircCount_parietal_filter <- CircCount_parietal[-circfiltered,]  
nrow(CircCount_parietal_filter)
```

```
##Filter the circRNAs based on linear ratios
```

```
rowIndex <- 1:nrow(CircCount_parietal)
```

```
circfiltered <- mclapply(rowIndex, circFILTER, CircCount_parietal, LinearCount_parietal, Nreplicates = 1,
filter.sample = 3, filter.count = 3, percentage = 0.1, mc.cores = 50)
```

```
#remove Null via https://stackoverflow.com/questions/26539441/remove-null-elements-from-list-of-lists/26540063
```

```
circfiltered <- unlist(Filter(Negate(function(x) is.null(unlist(x))), circfiltered))
```

```
CircCount_parietal_filter <- CircCount_parietal[-circfiltered,]
nrow(CircCount_parietal_filter)
```

```
##Filter the circRNAs based on linear ratios
```

```
rowIndex <- 1:nrow(CircCount_parietal)
```

```
circfiltered <- mclapply(rowIndex, circFILTER, CircCount_parietal, LinearCount_parietal, Nreplicates = 1,
filter.sample = 4, filter.count = 3, percentage = 0.1, mc.cores = 50)
```

```
#remove Null via https://stackoverflow.com/questions/26539441/remove-null-elements-from-list-of-lists/26540063
```

```
circfiltered <- unlist(Filter(Negate(function(x) is.null(unlist(x))), circfiltered))
```

```
CircCount_parietal_filter <- CircCount_parietal[-circfiltered,]
nrow(CircCount_parietal_filter)
```

```
##Filter the circRNAs based on linear ratios
```

```
rowIndex <- 1:nrow(CircCount_parietal)
```

```
circfiltered <- mclapply(rowIndex, circFILTER, CircCount_parietal, LinearCount_parietal, Nreplicates = 1,
filter.sample = 5, filter.count = 3, percentage = 0.1, mc.cores = 50)
```

```
#remove Null via https://stackoverflow.com/questions/26539441/remove-null-elements-from-list-of-lists/26540063
```

```
circfiltered <- unlist(Filter(Negate(function(x) is.null(unlist(x))), circfiltered))
```

```
CircCount_parietal_filter <- CircCount_parietal[-circfiltered,]
nrow(CircCount_parietal_filter)
```

```

###Filter 0.01 percentage

##Filter the circRNAs based on linear ratios

rowIndex <- 1:nrow(CircCount_parietal)

circfiltered <- mclapply(rowIndex, circFILTER, CircCount_parietal, LinearCount_parietal, Nreplicates = 1,
filter.sample = 0, filter.count = 3, percentage = 0.01, mc.cores = 50)

#remove Null via https://stackoverflow.com/questions/26539441/remove-null-elements-from-list-of-lists/26540063

circfiltered <- unlist(Filter(Negate(function(x) is.null(unlist(x))), circfiltered))

CircCount_parietal_filter <- CircCount_parietal[-circfiltered,]
nrow(CircCount_parietal_filter)

##Filter the circRNAs based on linear ratios

rowIndex <- 1:nrow(CircCount_parietal)

circfiltered <- mclapply(rowIndex, circFILTER, CircCount_parietal, LinearCount_parietal, Nreplicates = 1,
filter.sample = 1, filter.count = 3, percentage = 0.01, mc.cores = 50)

#remove Null via https://stackoverflow.com/questions/26539441/remove-null-elements-from-list-of-lists/26540063

circfiltered <- unlist(Filter(Negate(function(x) is.null(unlist(x))), circfiltered))

CircCount_parietal_filter <- CircCount_parietal[-circfiltered,]
nrow(CircCount_parietal_filter)

##Filter the circRNAs based on linear ratios

rowIndex <- 1:nrow(CircCount_parietal)

circfiltered <- mclapply(rowIndex, circFILTER, CircCount_parietal, LinearCount_parietal, Nreplicates = 1,
filter.sample = 2, filter.count = 3, percentage = 0.01, mc.cores = 50)

#remove Null via https://stackoverflow.com/questions/26539441/remove-null-elements-from-list-of-lists/26540063

```

```

circfiltered <- unlist(Filter(Negate(function(x) is.null(unlist(x))), circfiltered))

CircCount_parietal_filter <- CircCount_parietal[-circfiltered,]
nrow(CircCount_parietal_filter)

##Filter the circRNAs based on linear ratios

rowIndex <- 1:nrow(CircCount_parietal)

circfiltered <- mclapply(rowIndex, circFILTER, CircCount_parietal, LinearCount_parietal, Nreplicates = 1,
filter.sample = 3, filter.count = 3, percentage = 0.01, mc.cores = 50)

#remove Null via https://stackoverflow.com/questions/26539441/remove-null-elements-from-list-of-lists/26540063

circfiltered <- unlist(Filter(Negate(function(x) is.null(unlist(x))), circfiltered))

CircCount_parietal_filter <- CircCount_parietal[-circfiltered,]
nrow(CircCount_parietal_filter)

##Filter the circRNAs based on linear ratios

rowIndex <- 1:nrow(CircCount_parietal)

circfiltered <- mclapply(rowIndex, circFILTER, CircCount_parietal, LinearCount_parietal, Nreplicates = 1,
filter.sample = 4, filter.count = 3, percentage = 0.01, mc.cores = 50)

#remove Null via https://stackoverflow.com/questions/26539441/remove-null-elements-from-list-of-lists/26540063

circfiltered <- unlist(Filter(Negate(function(x) is.null(unlist(x))), circfiltered))

CircCount_parietal_filter <- CircCount_parietal[-circfiltered,]
nrow(CircCount_parietal_filter)

##Filter the circRNAs based on linear ratios

rowIndex <- 1:nrow(CircCount_parietal)

```

```
circfiltered <- mclapply(rowIndex, circFILTER, CircCount_parietal, LinearCount_parietal, Nreplicates = 1,
filter.sample = 5, filter.count = 3, percentage = 0.01, mc.cores = 50)
```

```
#remove Null via https://stackoverflow.com/questions/26539441/remove-null-elements-from-list-of-lists/26540063
```

```
circfiltered <- unlist(Filter(Negate(function(x) is.null(unlist(x))), circfiltered))
```

```
CircCount_parietal_filter <- CircCount_parietal[-circfiltered,]
nrow(CircCount_parietal_filter)
```

```
#####
#####
##### Spike In #####
#####
#####
```

```
circCoordinates_SPIKEIN <-
read.table("/home/dubeu/Synapse/align_individuals/align1_SPIKEIN/CHPC/CircCoordinates", sep="\t",
header=TRUE, stringsAsFactors = FALSE)
```

```
CircCount_SPIKEIN <-
read.table("/home/dubeu/Synapse/align_individuals/align1_SPIKEIN/CHPC/CircRNACount", sep="\t",
header=TRUE, stringsAsFactors = FALSE)
```

```
LinearCount_SPIKEIN <-
read.table("/home/dubeu/Synapse/align_individuals/align1_SPIKEIN/CHPC/LinearCount", sep="\t",
header=TRUE, stringsAsFactors = FALSE)
```

```
nrow(CircCount_SPIKEIN)
```

```
### 0 percentage
```

```
##Filter the circRNAs based on linear ratios
```

```
rowIndex <- 1:nrow(CircCount_SPIKEIN)
```

```
circfiltered <- mclapply(rowIndex, circFILTER, CircCount_SPIKEIN, LinearCount_SPIKEIN, Nreplicates = 1,
filter.sample = 1, filter.count = 3, percentage = 0, mc.cores = 50)
```

```
#remove Null via https://stackoverflow.com/questions/26539441/remove-null-elements-from-list-of-lists/26540063
```

```
circfiltered <- unlist(Filter(Negate(function(x) is.null(unlist(x))), circfiltered))
```

```
CircCount_SPIKEIN_filter <- CircCount_SPIKEIN[-circfiltered,]  
nrow(CircCount_SPIKEIN_filter)
```

```
##Filter the circRNAs based on linear ratios
```

```
rowIndex <- 1:nrow(CircCount_SPIKEIN)
```

```
circfiltered <- mclapply(rowIndex, circFILTER, CircCount_SPIKEIN, LinearCount_SPIKEIN, Nreplicates = 1,  
filter.sample = 2, filter.count = 3, percentage = 0, mc.cores = 50)
```

```
#remove Null via https://stackoverflow.com/questions/26539441/remove-null-elements-from-list-of-lists/26540063
```

```
circfiltered <- unlist(Filter(Negate(function(x) is.null(unlist(x))), circfiltered))
```

```
CircCount_SPIKEIN_filter <- CircCount_SPIKEIN[-circfiltered,]  
nrow(CircCount_SPIKEIN_filter)
```

```
##Filter the circRNAs based on linear ratios
```

```
rowIndex <- 1:nrow(CircCount_SPIKEIN)
```

```
circfiltered <- mclapply(rowIndex, circFILTER, CircCount_SPIKEIN, LinearCount_SPIKEIN, Nreplicates = 1,  
filter.sample = 3, filter.count = 3, percentage = 0, mc.cores = 50)
```

```
#remove Null via https://stackoverflow.com/questions/26539441/remove-null-elements-from-list-of-lists/26540063
```

```
circfiltered <- unlist(Filter(Negate(function(x) is.null(unlist(x))), circfiltered))
```

```
CircCount_SPIKEIN_filter <- CircCount_SPIKEIN[-circfiltered,]  
nrow(CircCount_SPIKEIN_filter)
```

```
##Filter the circRNAs based on linear ratios
```

```
rowIndex <- 1:nrow(CircCount_SPIKEIN)
```

```
circfiltered <- mclapply(rowIndex, circFILTER, CircCount_SPIKEIN, LinearCount_SPIKEIN, Nreplicates = 1,
filter.sample = 4, filter.count = 3, percentage = 0, mc.cores = 50)
```

```
#remove Null via https://stackoverflow.com/questions/26539441/remove-null-elements-from-list-of-lists/26540063
```

```
circfiltered <- unlist(Filter(Negate(function(x) is.null(unlist(x))), circfiltered))
```

```
CircCount_SPIKEIN_filter <- CircCount_SPIKEIN[-circfiltered,]
nrow(CircCount_SPIKEIN_filter)
```

```
##Filter the circRNAs based on linear ratios
```

```
rowIndex <- 1:nrow(CircCount_SPIKEIN)
```

```
circfiltered <- mclapply(rowIndex, circFILTER, CircCount_SPIKEIN, LinearCount_SPIKEIN, Nreplicates = 1,
filter.sample = 5, filter.count = 3, percentage = 0, mc.cores = 50)
```

```
#remove Null via https://stackoverflow.com/questions/26539441/remove-null-elements-from-list-of-lists/26540063
```

```
circfiltered <- unlist(Filter(Negate(function(x) is.null(unlist(x))), circfiltered))
```

```
CircCount_SPIKEIN_filter <- CircCount_SPIKEIN[-circfiltered,]
nrow(CircCount_SPIKEIN_filter)
```

```
### 0.1 percentage
```

```
##Filter the circRNAs based on linear ratios
```

```
rowIndex <- 1:nrow(CircCount_SPIKEIN)
```

```
circfiltered <- mclapply(rowIndex, circFILTER, CircCount_SPIKEIN, LinearCount_SPIKEIN, Nreplicates = 1,
filter.sample = 0, filter.count = 3, percentage = 0.1, mc.cores = 50)
```

```
#remove Null via https://stackoverflow.com/questions/26539441/remove-null-elements-from-list-of-lists/26540063
```

```
circfiltered <- unlist(Filter(Negate(function(x) is.null(unlist(x))), circfiltered))
```



```

CircCount_SPIKEIN_filter <- CircCount_SPIKEIN[-circfiltered,]
nrow(CircCount_SPIKEIN_filter)

##Filter the circRNAs based on linear ratios

rowIndex <- 1:nrow(CircCount_SPIKEIN)

circfiltered <- mclapply(rowIndex, circFILTER, CircCount_SPIKEIN, LinearCount_SPIKEIN, Nreplicates = 1,
filter.sample = 1, filter.count = 3, percentage = 0.1, mc.cores = 50)

#remove Null via https://stackoverflow.com/questions/26539441/remove-null-elements-from-list-of-lists/26540063

circfiltered <- unlist(Filter(Negate(function(x) is.null(unlist(x))), circfiltered))

CircCount_SPIKEIN_filter <- CircCount_SPIKEIN[-circfiltered,]
nrow(CircCount_SPIKEIN_filter)

##Filter the circRNAs based on linear ratios

rowIndex <- 1:nrow(CircCount_SPIKEIN)

circfiltered <- mclapply(rowIndex, circFILTER, CircCount_SPIKEIN, LinearCount_SPIKEIN, Nreplicates = 1,
filter.sample = 2, filter.count = 3, percentage = 0.1, mc.cores = 50)

#remove Null via https://stackoverflow.com/questions/26539441/remove-null-elements-from-list-of-lists/26540063

circfiltered <- unlist(Filter(Negate(function(x) is.null(unlist(x))), circfiltered))

CircCount_SPIKEIN_filter <- CircCount_SPIKEIN[-circfiltered,]
nrow(CircCount_SPIKEIN_filter)

##Filter the circRNAs based on linear ratios

rowIndex <- 1:nrow(CircCount_SPIKEIN)

circfiltered <- mclapply(rowIndex, circFILTER, CircCount_SPIKEIN, LinearCount_SPIKEIN, Nreplicates = 1,
filter.sample = 3, filter.count = 3, percentage = 0.1, mc.cores = 50)

```

```
#remove Null via https://stackoverflow.com/questions/26539441/remove-null-elements-from-list-of-lists/26540063
```

```
circfiltered <- unlist(Filter(Negate(function(x) is.null(unlist(x))), circfiltered))
```

```
CircCount_SPIKEIN_filter <- CircCount_SPIKEIN[-circfiltered,]  
nrow(CircCount_SPIKEIN_filter)
```

```
##Filter the circRNAs based on linear ratios
```

```
rowIndex <- 1:nrow(CircCount_SPIKEIN)
```

```
circfiltered <- mclapply(rowIndex, circFILTER, CircCount_SPIKEIN, LinearCount_SPIKEIN, Nreplicates = 1,  
filter.sample = 4, filter.count = 3, percentage = 0.1, mc.cores = 50)
```

```
#remove Null via https://stackoverflow.com/questions/26539441/remove-null-elements-from-list-of-lists/26540063
```

```
circfiltered <- unlist(Filter(Negate(function(x) is.null(unlist(x))), circfiltered))
```

```
CircCount_SPIKEIN_filter <- CircCount_SPIKEIN[-circfiltered,]  
nrow(CircCount_SPIKEIN_filter)
```

```
##Filter the circRNAs based on linear ratios
```

```
rowIndex <- 1:nrow(CircCount_SPIKEIN)
```

```
circfiltered <- mclapply(rowIndex, circFILTER, CircCount_SPIKEIN, LinearCount_SPIKEIN, Nreplicates = 1,  
filter.sample = 5, filter.count = 3, percentage = 0.1, mc.cores = 50)
```

```
#remove Null via https://stackoverflow.com/questions/26539441/remove-null-elements-from-list-of-lists/26540063
```

```
circfiltered <- unlist(Filter(Negate(function(x) is.null(unlist(x))), circfiltered))
```

```
CircCount_SPIKEIN_filter <- CircCount_SPIKEIN[-circfiltered,]  
nrow(CircCount_SPIKEIN_filter)
```

```
###Filter 0.1 percentage
```

```
##Filter the circRNAs based on linear ratios
```

```

rowIndex <- 1:nrow(CircCount_SPIKEIN)

circfiltered <- mclapply(rowIndex, circFILTER, CircCount_SPIKEIN, LinearCount_SPIKEIN, Nreplicates = 1,
filter.sample = 0, filter.count = 3, percentage = 0.1, mc.cores = 50)

#remove Null via https://stackoverflow.com/questions/26539441/remove-null-elements-from-list-of-lists/26540063

circfiltered <- unlist(Filter(Negate(function(x) is.null(unlist(x))), circfiltered))

CircCount_SPIKEIN_filter <- CircCount_SPIKEIN[-circfiltered,]
nrow(CircCount_SPIKEIN_filter)

##Filter the circRNAs based on linear ratios

rowIndex <- 1:nrow(CircCount_SPIKEIN)

circfiltered <- mclapply(rowIndex, circFILTER, CircCount_SPIKEIN, LinearCount_SPIKEIN, Nreplicates = 1,
filter.sample = 1, filter.count = 3, percentage = 0.1, mc.cores = 50)

#remove Null via https://stackoverflow.com/questions/26539441/remove-null-elements-from-list-of-lists/26540063

circfiltered <- unlist(Filter(Negate(function(x) is.null(unlist(x))), circfiltered))

CircCount_SPIKEIN_filter <- CircCount_SPIKEIN[-circfiltered,]
nrow(CircCount_SPIKEIN_filter)

##Filter the circRNAs based on linear ratios

rowIndex <- 1:nrow(CircCount_SPIKEIN)

circfiltered <- mclapply(rowIndex, circFILTER, CircCount_SPIKEIN, LinearCount_SPIKEIN, Nreplicates = 1,
filter.sample = 2, filter.count = 3, percentage = 0.1, mc.cores = 50)

#remove Null via https://stackoverflow.com/questions/26539441/remove-null-elements-from-list-of-lists/26540063

circfiltered <- unlist(Filter(Negate(function(x) is.null(unlist(x))), circfiltered))

CircCount_SPIKEIN_filter <- CircCount_SPIKEIN[-circfiltered,]

```

```

nrow(CircCount_SPIKEIN_filter)

##Filter the circRNAs based on linear ratios

rowIndex <- 1:nrow(CircCount_SPIKEIN)

circfiltered <- mclapply(rowIndex, circFILTER, CircCount_SPIKEIN, LinearCount_SPIKEIN, Nreplicates = 1,
filter.sample = 3, filter.count = 3, percentage = 0.1, mc.cores = 50)

#remove Null via https://stackoverflow.com/questions/26539441/remove-null-elements-from-list-of-lists/26540063

circfiltered <- unlist(Filter(Negate(function(x) is.null(unlist(x))), circfiltered))

CircCount_SPIKEIN_filter <- CircCount_SPIKEIN[-circfiltered,]
nrow(CircCount_SPIKEIN_filter)

##Filter the circRNAs based on linear ratios

rowIndex <- 1:nrow(CircCount_SPIKEIN)

circfiltered <- mclapply(rowIndex, circFILTER, CircCount_SPIKEIN, LinearCount_SPIKEIN, Nreplicates = 1,
filter.sample = 4, filter.count = 3, percentage = 0.1, mc.cores = 50)

#remove Null via https://stackoverflow.com/questions/26539441/remove-null-elements-from-list-of-lists/26540063

circfiltered <- unlist(Filter(Negate(function(x) is.null(unlist(x))), circfiltered))

CircCount_SPIKEIN_filter <- CircCount_SPIKEIN[-circfiltered,]
nrow(CircCount_SPIKEIN_filter)

##Filter the circRNAs based on linear ratios

rowIndex <- 1:nrow(CircCount_SPIKEIN)

circfiltered <- mclapply(rowIndex, circFILTER, CircCount_SPIKEIN, LinearCount_SPIKEIN, Nreplicates = 1,
filter.sample = 5, filter.count = 3, percentage = 0.1, mc.cores = 50)

#remove Null via https://stackoverflow.com/questions/26539441/remove-null-elements-from-list-of-lists/26540063

```

```
circfiltered <- unlist(Filter(Negate(function(x) is.null(unlist(x))), circfiltered))
```

```
CircCount_SPIKEIN_filter <- CircCount_SPIKEIN[-circfiltered,]  
nrow(CircCount_SPIKEIN_filter)
```

## Knight ADRC

```
##Knight ADRC Parietal Processing  
``{r}
```

```
#####  
#####  
##### Filter the circRNAs based on linear ratio #####  
#####  
#####
```

```
##Adapted these functions from (https://github.com/dieterich-lab/CircTest) to run in parallel
```

```
circ_max_perc <- function(circ=circ,linear=linear,Nreplicates=3){  
  # convert to vector  
  circ = as.numeric(circ)  
  linear = as.numeric(linear)  
  if( length(circ) != length(linear) ){  
    stop ('Number of samples in circRNA is not equal to Hostgene.')  
  }  
  Ngroups = length(circ)/Nreplicates  
  # calculate percentage  
  circ_sum = unname(tapply(circ, (seq_along(1:length(circ))-1) %% Nreplicates, sum ))  
  linear_sum = unname(tapply(linear, (seq_along(1:length(linear))-1) %% Nreplicates, sum ))  
  perc = max(circ_sum / (circ_sum+linear_sum),na.rm=T)  
  return(perc)  
}
```

```
circFILTER <- function(i, circ, linear, Nreplicates, filter.sample, filter.count, percentage,  
circle_description=c(1:3)) {  
  
  del_row=c()  
  
  if ( sum(circ[i,-circle_description]>=filter.count)<filter.sample | circ_max_perc(circ[i,-  
circle_description], linear[i,-circle_description],Nreplicates=Nreplicates)<percentage) {  
    del_row = c(del_row,i)  
  }  
}
```

```

del_row

}

#####
#####
## Discovery in Parietal from WUSM ##
#####
#####

##Load in circRNA count data generated by DCC##

circCoordinates_parietal <- read.table("/home/dubeu/Synapse/DCC/CircCoordinates", sep="\t",
header=TRUE, stringsAsFactors = FALSE)
CircCount_parietal <- read.table("/home/dubeu/Synapse/DCC/CircRNACount", sep="\t", header=TRUE,
stringsAsFactors = FALSE)
LinearCount_parietal <- read.table("/home/dubeu/Synapse/DCC/LinearCount", sep="\t", header=TRUE,
stringsAsFactors = FALSE)

##Filter the circRNAs based on linear ratios

rowIndex <- 1:nrow(CircCount_parietal)

circfiltered <- mclapply(rowIndex, circFILTER, CircCount_parietal, LinearCount_parietal, Nreplicates = 1,
filter.sample = 3, filter.count = 3, percentage = 0.1, mc.cores = 50)

circfiltered_parietal <- unlist(Filter(Negate(function(x) is.null(unlist(x))), circfiltered))

CircCount_parietal <- CircCount_parietal[-circfiltered_parietal,]

circCoordinates_parietal_filter <- circCoordinates_parietal[-circfiltered_parietal,]

#Remove extraneous columns

CircCount_parietal <- CircCount_parietal[,4:ncol(CircCount_parietal)]

##Adjust names
names(CircCount_parietal) <- gsub("_circRNA_Align1_Chimeric.out.junction", "",
names(CircCount_parietal))

```

```

##Collapse circRNA counts onto the gene level, removing those that are not_annotated
CircCount_parietal$Gene <- circCoordinates_parietal[rownames(CircCount_parietal),]$Gene
CircCount_parietal <- subset(CircCount_parietal, Gene != "not_annotated")
mydat.max_parietal <- aggregate(. ~ Gene, data = CircCount_parietal, sum)
rownames(mydat.max_parietal) <- mydat.max_parietal$Gene
mydat.max_parietal$Gene <- NULL
cts_parietal <- mydat.max_parietal
rownames(cts_parietal) <- paste0("circ", rownames(cts_parietal))

##load Parietal phenotype / covariate information
coldata_parietal <- read.csv(file="/40/AD/Expression/KnightADRCParietal/03.-phenotype/Pheno",
header=TRUE, na.strings = "NA")
#Restrict analyses to parietal tissues
coldata_parietal <- subset(coldata_parietal, brain_region == "parietal")

#Rename
coldata_parietal$ID_RNAseq <- gsub("VY-", "VY.", coldata_parietal$ID_RNAseq)

#Temporarily Assigning Ethnicity#
coldata_parietal$Ethnicity <- coldata_parietal$Ethnicity_temp

##Remove Consensus Outliers
coldata_parietal <- subset(coldata_parietal, ConsensusOutlier_RemoveBefore != 1)

#Set rownames
rownames(coldata_parietal) <- coldata_parietal$ID_RNAseq

cts_parietal <- cts_parietal[, rownames(coldata_parietal)]

#Set up factor levels
coldata_parietal$pool <- factor(coldata_parietal$pool, levels=c('1','2'))
coldata_parietal$GENDER <- factor(coldata_parietal$GENDER, levels=c('1','2'))
coldata_parietal$Ethnicity <- factor(coldata_parietal$Ethnicity, levels = c("EA", "AA"))
coldata_parietal$condition <- droplevels(coldata_parietal$condition)

#####
#####
## DE Analyses ##

```

```
#####  
#####
```

```
##DE based on condition ##
```

```
#####
```

```
## Filtering QC ##
```

```
## via: https://support.bioconductor.org/p/65256/ ##
```

```
## triplicate by lowest number: https://support.bioconductor.org/p/49710/ ##
```

```
#####
```

```
dds_parietal_condition_filter <- DESeqDataSetFromMatrix(countData = cts_parietal, colData =  
coldata_parietal, design = ~ 1)
```

```
dds_parietal_condition_filter <- estimateSizeFactors(dds_parietal_condition_filter)
```

```
##subset based on covars so that none are missing
```

```
dds_parietal_condition_filter <- dds_parietal_condition_filter[  
,!is.na(dds_parietal_condition_filter$AGE_at_death)]
```

```
dds_parietal_condition_filter <- dds_parietal_condition_filter[  
,!is.na(dds_parietal_condition_filter$PMI)]
```

```
dds_parietal_condition_filter <- dds_parietal_condition_filter[  
,!is.na(dds_parietal_condition_filter$PC1)]
```

```
dds_parietal_condition_filter <- dds_parietal_condition_filter[  
,!is.na(dds_parietal_condition_filter$PC2)]
```

```
#Remove dementedcontrols
```

```
dds_parietal_condition_filter <- dds_parietal_condition_filter[,  
!(dds_parietal_condition_filter$DementedControl == 1) ]
```

```
#Variable under investigation is at the end of the design formula
```

```
design(dds_parietal_condition_filter) = formula( ~ PMI + TIN.median. + AGE_at_death + pool + GENDER  
+ PC1 + PC2 + condition)
```

```
#Run the actual DESeq2 function
```

```
dds_parietal_final_condition_filter <- DESeq(dds_parietal_condition_filter, parallel = TRUE, betaPrior =  
FALSE)
```

```
##Analyze results based on contrast
```



```
res_parietal_condition_filter <- results(dds_parietal_final_condition_filter, contrast=c("condition",
"LOAD", "CO"), alpha = 0.05)
summary(res_parietal_condition_filter)
```

```
##DE based on braak ##
```

```
#####
```

```
## Filtering QC ##
```

```
## via: https://support.bioconductor.org/p/65256/ ##
```

```
## triplicate by lowest number: https://support.bioconductor.org/p/49710/ ##
```

```
#####
```

```
dds_parietal_braak_filter <- DESeqDataSetFromMatrix(countData = cts_parietal, colData =
coldata_parietal, design = ~ 1)
```

```
dds_parietal_braak_filter <- estimateSizeFactors(dds_parietal_braak_filter)
```

```
##subset based on covars so that none are missing
```

```
dds_parietal_braak_filter <- dds_parietal_braak_filter[, !is.na(dds_parietal_braak_filter$AGE_at_death)]
dds_parietal_braak_filter <- dds_parietal_braak_filter[, !is.na(dds_parietal_braak_filter$PMI)]
dds_parietal_braak_filter <- dds_parietal_braak_filter[, !is.na(dds_parietal_braak_filter$braak_final)]
dds_parietal_braak_filter <- dds_parietal_braak_filter[, !is.na(dds_parietal_braak_filter$PC1)]
dds_parietal_braak_filter <- dds_parietal_braak_filter[, !is.na(dds_parietal_braak_filter$PC2)]
```

```
#Remove dementedcontrols
```

```
dds_parietal_braak_filter <- dds_parietal_braak_filter[, !(dds_parietal_braak_filter$DementedControl
== 1) ]
```

```
##Only include LOAD and controls
```

```
dds_parietal_braak_filter <- dds_parietal_braak_filter[, dds_parietal_braak_filter$condition != "ADAD" ]
dds_parietal_braak_filter$condition <- droplevels(dds_parietal_braak_filter$condition)
```

```
design(dds_parietal_braak_filter) = formula( ~ PMI + TIN.median. + AGE_at_death + pool + GENDER +
PC1 + PC2 + braak_final)
```

```
dds_parietal_final_braak_filter <- DESeq(dds_parietal_braak_filter, parallel = TRUE, betaPrior = FALSE)
```

```

res_parietal_braak_filter <- results(dds_parietal_final_braak_filter, alpha = 0.05)
summary(res_parietal_braak_filter)

##DE based on CDR ##

#####
## Filtering QC ##
## via: https://support.bioconductor.org/p/65256/ ##
## triplicate by lowest number: https://support.bioconductor.org/p/49710/ ##
#####

dds_parietal_CDR_filter <- DESeqDataSetFromMatrix(countData = cts_parietal, colData =
coldata_parietal, design = ~ 1)

dds_parietal_CDR_filter <- estimateSizeFactors(dds_parietal_CDR_filter)

##subset based on covars so that none are missing

dds_parietal_CDR_filter <- dds_parietal_CDR_filter[ ,!is.na(dds_parietal_CDR_filter$AGE_at_death)]
dds_parietal_CDR_filter <- dds_parietal_CDR_filter[ ,!is.na(dds_parietal_CDR_filter$PMI)]
dds_parietal_CDR_filter <- dds_parietal_CDR_filter[ ,!is.na(dds_parietal_CDR_filter$CDR_e)]
dds_parietal_CDR_filter <- dds_parietal_CDR_filter[ ,!is.na(dds_parietal_CDR_filter$PC1)]
dds_parietal_CDR_filter <- dds_parietal_CDR_filter[ ,!is.na(dds_parietal_CDR_filter$PC2)]

#Remove dementedcontrols
dds_parietal_CDR_filter <- dds_parietal_CDR_filter[ ,(dds_parietal_CDR_filter$DementedControl == 1) ]

##Only include LOAD and controls
dds_parietal_CDR_filter <- dds_parietal_CDR_filter[ ,dds_parietal_CDR_filter$condition != "ADAD" ]
dds_parietal_CDR_filter$condition <- droplevels(dds_parietal_CDR_filter$condition)

design(dds_parietal_CDR_filter) = formula( ~ PMI + TIN.median. + AGE_at_death + pool + GENDER + PC1
+ PC2 + CDR_e)

dds_parietal_final_CDR_filter <- DESeq(dds_parietal_CDR_filter, parallel = TRUE, betaPrior = FALSE)

res_parietal_CDR_filter <- results(dds_parietal_final_CDR_filter, alpha = 0.05)
summary(res_parietal_CDR_filter)

##Test if swapping TIN for RIN impacts the observed effect size
dds_parietal_CDR_filter_RIN <- dds_parietal_CDR_filter

```

```
design(dds_parietal_CDR_filter_RIN) = formula( ~ PMI + QC.RIN + AGE_at_death + pool + GENDER + PC1
+ PC2 + CDR_e)
```

```
dds_parietal_final_CDR_filter_RIN <- DESeq(dds_parietal_CDR_filter_RIN, parallel = TRUE, betaPrior =
FALSE)
```

```
res_parietal_CDR_filter_RIN <- results(dds_parietal_final_CDR_filter_RIN, alpha = 0.05)
summary(res_parietal_CDR_filter_RIN)
```

```
cor.test(res_parietal_CDR_filter[GeneList_parietal_CDR,]$log2FoldChange,
res_parietal_CDR_filter_RIN[GeneList_parietal_CDR,]$log2FoldChange)
```

```
cor.test((res_parietal_CDR_filter[rownames(subset(res_parietal_CDR_filter_RIN[GeneList_parietal_CDR,
], pvalue < 0.05)),]$log2FoldChange), (subset(res_parietal_CDR_filter_RIN[GeneList_parietal_CDR,],
pvalue < 0.05)$log2FoldChange))
```

```
#####
#####
## Calculate Parietal Overlap ##
#####
#####
```

```
GeneList_parietal_condition <- rownames(subset(res_parietal_condition_filter, padj < 0.05))
```

```
GeneList_parietal_CDR <- rownames(subset(res_parietal_CDR_filter, padj < 0.05))
```

```
GeneList_parietal_braak <- rownames(subset(res_parietal_braak_filter, padj < 0.05))
```

```
grid.newpage()
draw.triple.venn(area1 = length(GeneList_parietal_condition), area2 = length(GeneList_parietal_CDR),
area3 = length(GeneList_parietal_braak), n12 = length(intersect(GeneList_parietal_condition,
GeneList_parietal_CDR)), n23 = length(intersect(GeneList_parietal_CDR, GeneList_parietal_braak)), n13
= length(intersect(GeneList_parietal_condition, GeneList_parietal_braak)),
n123 = length(Reduce(intersect, list(GeneList_parietal_condition, GeneList_parietal_CDR,
GeneList_parietal_braak))), category = c("LOAD Case", "CDR", "Braak"), lty = "blank",
cex = 1.5,
fontface = "bold",
fontfamily = "sans",
cat.cex = 1.8,
cat.fontface = "bold",
cat.default.pos = "outer",
```

```

fill = c("skyblue", "pink1", "mediumorchid"))

intersect(GeneList_parietal_condition, GeneList_parietal_CDR, GeneList_parietal_braak)

...

DIAN

##DIAN ADAD Parietal Processing
```{r}

##Load in circRNA count data generated by DCC##

circCoordinates_parietalADAD <- read.table("/home/dubeu/Synapse/DCC/CircCoordinates", sep="\t",
header=TRUE, stringsAsFactors = FALSE)
CircCount_parietalADAD <- read.table("/home/dubeu/Synapse/DCC/CircRNACount", sep="\t",
header=TRUE, stringsAsFactors = FALSE)
LinearCount_parietalADAD <- read.table("/home/dubeu/Synapse/DCC/LinearCount", sep="\t",
header=TRUE, stringsAsFactors = FALSE)

##Filter the circRNAs based on linear ratios

rowIndex <- 1:nrow(CircCount_parietalADAD)

circfiltered <- mclapply(rowIndex, circFILTER, CircCount_parietalADAD, LinearCount_parietalADAD,
Nreplicates = 1, filter.sample = 3, filter.count = 3, percentage = 0.1, mc.cores = 50)

#remove Null via https://stackoverflow.com/questions/26539441/remove-null-elements-from-list-of-lists/26540063

circfiltered_parietalADAD <- unlist(Filter(Negate(function(x) is.null(unlist(x))), circfiltered))

CircCount_parietalADAD <- CircCount_parietalADAD[-circfiltered_parietalADAD,]

circCoordinates_parietalADAD_filter <- circCoordinates_parietalADAD[-circfiltered_parietalADAD,]

#Remove extraneous columns

CircCount_parietalADAD <- CircCount_parietalADAD[,4:ncol(CircCount_parietalADAD)]

##Adjust names
names(CircCount_parietalADAD) <- gsub("_circRNA_Align1_Chimeric.out.junction", "",
names(CircCount_parietalADAD))

```

```

##Collapse circRNA counts onto the gene level, removing those that are not_annotated
CircCount_parietalADAD$Gene <-
circCoordinates_parietalADAD[rownames(CircCount_parietalADAD),]$Gene
CircCount_parietalADAD <- subset(CircCount_parietalADAD, Gene != "not_annotated")
mydat.max_parietalADAD <- aggregate(. ~ Gene, data = CircCount_parietalADAD, sum)
rownames(mydat.max_parietalADAD) <- mydat.max_parietalADAD$Gene
mydat.max_parietalADAD$Gene <- NULL
cts_parietalADAD <- mydat.max_parietalADAD
rownames(cts_parietalADAD) <- paste0("circ", rownames(cts_parietalADAD))

##load parietalADAD phenotype / covariate information
coldata_parietalADAD <- read.csv(file="/40/AD/Expression/KnightADRCParietal/03.-phenotype/Pheno",
header=TRUE, na.strings = "NA")
#Restrict analyses to parietal tissues
coldata_parietalADAD <- subset(coldata_parietalADAD, brain_region == "parietal")

#Rename
coldata_parietalADAD$ID_RNAseq <- gsub("VY-", "VY.", coldata_parietalADAD$ID_RNAseq)

#Temporarily Assigning Ethnicity#
coldata_parietalADAD$Ethnicity <- coldata_parietalADAD$Ethnicity_temp

##Remove Consensus Outliers
coldata_parietalADAD <- subset(coldata_parietalADAD, ConsensusOutlier_RemoveBefore != 1)

#Set rownames
rownames(coldata_parietalADAD) <- coldata_parietalADAD$ID_RNAseq

#Restrict counts to match rownames
cts_parietalADAD <- cts_parietalADAD[, rownames(coldata_parietalADAD)]

#Set up factor levels
coldata_parietalADAD$pool <- factor(coldata_parietalADAD$pool, levels=c('1','2'))
coldata_parietalADAD$GENDER <- factor(coldata_parietalADAD$GENDER, levels=c('1','2'))
coldata_parietalADAD$Ethnicity <- factor(coldata_parietalADAD$Ethnicity, levels = c("EA", "AA"))
coldata_parietalADAD$condition <- droplevels(coldata_parietalADAD$condition)

```

```

#####
#####
## DE Analyses ##
#####
#####

##DE based on condition ##

#####
## Filtering QC ##
## via: https://support.bioconductor.org/p/65256/ ##
## triplicate by lowest number: https://support.bioconductor.org/p/49710/ ##
#####

dds_parietalADAD_condition_filter <- DESeqDataSetFromMatrix(countData = cts_parietalADAD, colData
= coldata_parietalADAD, design = ~ 1)

dds_parietalADAD_condition_filter <- estimateSizeFactors(dds_parietalADAD_condition_filter)

#Remove dementedcontrols
dds_parietalADAD_condition_filter <- dds_parietalADAD_condition_filter[,
!(dds_parietalADAD_condition_filter$DementedControl == 1) ]

dds_parietalADAD_condition_filter <- dds_parietalADAD_condition_filter[
,!is.na(dds_parietalADAD_condition_filter$PMI)]

##Do not filter ADAD by PCs or AOD due to being missing from the dataset
#dds_parietalADAD_condition_filter <- dds_parietalADAD_condition_filter[
,!is.na(dds_parietalADAD_condition_filter$PC1)]
#dds_parietalADAD_condition_filter <- dds_parietalADAD_condition_filter[
,!is.na(dds_parietalADAD_condition_filter$PC2)]
#dds_parietalADAD_condition_filter <- dds_parietalADAD_condition_filter[
,!is.na(dds_parietalADAD_condition_filter$AGE_at_death)]

#Removed AGE_at_death since controls will be older than cases. In addition, replaced PC1 + PC2 with
Ethnicity due to above
design(dds_parietalADAD_condition_filter) = formula( ~ PMI + TIN.median. + pool + GENDER + Ethnicity
+ condition)

```

```
dds_parietalADAD_final_condition_filter <- DESeq(dds_parietalADAD_condition_filter, parallel = TRUE,
betaPrior = FALSE)
```

```
##Analyze results based on contrast
```

```
res_parietalADAD_condition_filter_ADADvsCO <- results(dds_parietalADAD_final_condition_filter,
contrast=c("condition", "ADAD", "CO"), alpha = 0.05)
summary(res_parietalADAD_condition_filter_ADADvsCO)
```

```
res_parietalADAD_condition_filter_ADADvsLOAD <- results(dds_parietalADAD_final_condition_filter,
contrast=c("condition", "ADAD", "LOAD"), alpha = 0.05)
summary(res_parietalADAD_condition_filter_ADADvsLOAD)
```

```
##DE based on condition, controlling for Braak Score ##
```

```
#####
```

```
## Filtering QC ##
```

```
## via: https://support.bioconductor.org/p/65256/ ##
```

```
## triplicate by lowest number: https://support.bioconductor.org/p/49710/ ##
```

```
#####
```

```
dds_parietalADAD_conditionBraak_filter <- DESeqDataSetFromMatrix(countData = cts_parietalADAD,
colData = coldata_parietalADAD, design = ~ 1)
```

```
dds_parietalADAD_conditionBraak_filter <-
estimateSizeFactors(dds_parietalADAD_conditionBraak_filter)
```

```
#Remove dementedcontrols
```

```
dds_parietalADAD_conditionBraak_filter <- dds_parietalADAD_conditionBraak_filter[,
!(dds_parietalADAD_conditionBraak_filter$DementedControl == 1) ]
```

```
dds_parietalADAD_conditionBraak_filter <- dds_parietalADAD_conditionBraak_filter[
,!is.na(dds_parietalADAD_conditionBraak_filter$PMI)]
```

```
##Do not filter ADAD by PCs or AOD due to being missing from the dataset
```

```
##dds_parietalADAD_conditionBraak_filter <- dds_parietalADAD_conditionBraak_filter[
,!is.na(dds_parietalADAD_conditionBraak_filter$PC1)]
```

```
##dds_parietalADAD_conditionBraak_filter <- dds_parietalADAD_conditionBraak_filter[
,!is.na(dds_parietalADAD_conditionBraak_filter$PC2)]
```

```
##dds_parietalADAD_conditionBraak_filter <- dds_parietalADAD_conditionBraak_filter[
,!is.na(dds_parietalADAD_conditionBraak_filter$AGE_at_death)]
```

```
#Include Braak
```

```
dds_parietalADAD_conditionBraak_filter <- dds_parietalADAD_conditionBraak_filter[  
,!is.na(dds_parietalADAD_conditionBraak_filter$braak_final)]
```

```
dds_parietalADAD_conditionBraak_filter$condition <-  
droplevels(dds_parietalADAD_conditionBraak_filter$condition)
```

```
#Removed AGE_at_death since controls will be older than cases. In addition, replaced PC1 + PC2 with  
Ethnicity due to above
```

```
design(dds_parietalADAD_conditionBraak_filter) = formula(~ PMI + TIN.median. + pool + GENDER +  
Ethnicity + braak_final + condition)
```

```
dds_parietalADAD_final_conditionBraak_filter <- DESeq(dds_parietalADAD_conditionBraak_filter,  
parallel = TRUE, betaPrior = FALSE)
```

```
##Analyze results based on contrast
```

```
res_parietalADAD_conditionBraak_filter_ADADvsCO <-  
results(dds_parietalADAD_final_conditionBraak_filter, contrast=c("condition", "ADAD", "CO"), alpha =  
0.05)  
summary(res_parietalADAD_conditionBraak_filter_ADADvsCO)
```

```
res_parietalADAD_conditionBraak_filter_ADADvsLOAD <-  
results(dds_parietalADAD_final_conditionBraak_filter, contrast=c("condition", "ADAD", "LOAD"), alpha =  
0.05)  
summary(res_parietalADAD_conditionBraak_filter_ADADvsLOAD)
```

```
###Condition
```

```
##Aggregate / intersect list of genes
```

```
#GeneList_parietal_LOADvsCO <- unique(c(rownames(subset(res_parietal_condition_filter, padj <  
0.05)), rownames(subset(res_parietal_braak_filter, padj < 0.05)),  
rownames(subset(res_parietal_CDR_filter, padj < 0.05))))
```

```
GeneList_parietal_LOADvsCO <- rownames(subset(res_parietal_condition_filter, padj < 0.05))
```

```
GeneList_parietal_ADADvsCO <- rownames(subset(res_parietalADAD_condition_filter_ADADvsCO, padj  
< 0.05))
```



```
GeneList_parietal_ADADvsLOAD <-  
rownames(subset(res_parietalADAD_conditionBraak_filter_ADADvsLOAD, padj < 0.05))
```

```
grid.newpage()  
pushViewport(viewport(width=unit(0.8, "npc"), height = unit(0.8, "npc")))  
draw.triple.venn(area1 = length(GeneList_parietal_LOADvsCO), area2 =  
length(GeneList_parietal_ADADvsLOAD), area3 = length(GeneList_parietal_ADADvsCO), n12 =  
length(intersect(GeneList_parietal_LOADvsCO, GeneList_parietal_ADADvsLOAD)), n23 =  
length(intersect(GeneList_parietal_ADADvsLOAD, GeneList_parietal_ADADvsCO)), n13 =  
length(intersect(GeneList_parietal_LOADvsCO, GeneList_parietal_ADADvsCO)),  
n123 = length(Reduce(intersect, list(GeneList_parietal_LOADvsCO, GeneList_parietal_ADADvsLOAD,  
GeneList_parietal_ADADvsCO))), category = c("ADvsCO", "ADADvsAD*", "ADADvsCO"), lty = "blank",  
cex = 1.5,  
fontface = "bold",  
fontfamily = "sans",  
cat.cex = 1.5,  
cat.fontface = "bold",  
cat.default.pos = "outer",  
fill = c("skyblue", "pink1", "mediumorchid"))
```

```
#####  
#####  
## Check of consistency in direction of effect ADAD and LOAD ##  
#####  
#####
```

```
GeneList_parietal_LOADvsCO <- rownames(subset(res_parietal_condition_filter, padj < 0.05))
```

```
GeneList_parietal_ADADvsCO <- rownames(subset(res_parietalADAD_condition_filter_ADADvsCO, padj  
< 0.05))
```

```
GeneList_parietal_ADADvsLOAD <-  
rownames(subset(res_parietalADAD_conditionBraak_filter_ADADvsLOAD, padj < 0.05))
```

```
OverlapADAD_CO_ADAD_LOAD <-  
cbind(res_parietalADAD_condition_filter_ADADvsCO[intersect(GeneList_parietal_ADADvsCO,  
GeneList_parietal_ADADvsLOAD),]$log2FoldChange,
```

```

res_parietalADAD_conditionBraak_filter_ADADvsLOAD[intersect(GeneList_parietal_ADADvsCO,
GeneList_parietal_ADADvsLOAD),]$log2FoldChange)
OverlapADAD_CO_ADAD_LOAD <- cbind(OverlapADAD_CO_ADAD_LOAD, samesign=
as.data.frame(sign(OverlapADAD_CO_ADAD_LOAD[,1])==sign(OverlapADAD_CO_ADAD_LOAD[,2])))
OverlapADAD_CO_ADAD_LOAD <- cbind(OverlapADAD_CO_ADAD_LOAD, increasingSeverity=
as.data.frame(abs(OverlapADAD_CO_ADAD_LOAD[,1])>abs(OverlapADAD_CO_ADAD_LOAD[,2])))

```

```

cbind(res_parietal_condition_filter[Reduce(intersect, list(GeneList_parietal_LOADvsCO,
GeneList_parietal_ADADvsLOAD, GeneList_parietal_ADADvsCO)),]$log2FoldChange,
res_parietalADAD_condition_filter_ADADvsCO[Reduce(intersect, list(GeneList_parietal_LOADvsCO,
GeneList_parietal_ADADvsLOAD, GeneList_parietal_ADADvsCO)),]$log2FoldChange,
res_parietalADAD_conditionBraak_filter_ADADvsLOAD[Reduce(intersect,
list(GeneList_parietal_LOADvsCO, GeneList_parietal_ADADvsLOAD,
GeneList_parietal_ADADvsCO)),]$log2FoldChange)

```

```

#####
#####
## Calculate overlap between ADAD and LOAD ##
#####
#####

```

```

###Condition
##Aggregate / intersect list of genes
#GeneList_parietal_LOADvsCO <- unique(c(rownames(subset(res_parietal_condition_filter, padj <
0.05)), rownames(subset(res_parietal_braak_filter, padj < 0.05)),
rownames(subset(res_parietal_CDR_filter, padj < 0.05))))

```

```

GeneList_parietal_LOADvsCO <- rownames(subset(res_parietal_condition_filter, padj < 0.05))

```

```

GeneList_parietal_ADADvsCO <- rownames(subset(res_parietalADAD_condition_filter_ADADvsCO, padj
< 0.05))

```

```

GeneList_parietal_ADADvsLOAD <-
rownames(subset(res_parietalADAD_conditionBraak_filter_ADADvsLOAD, padj < 0.05))

```

```

grid.newpage()
pushViewport(viewport(width=unit(0.8, "npc"), height = unit(0.8, "npc")))
draw.triple.venn(area1 = length(GeneList_parietal_LOADvsCO), area2 =
length(GeneList_parietal_ADADvsLOAD), area3 = length(GeneList_parietal_ADADvsCO), n12 =

```

```

length(intersect(GeneList_parietal_LOADvsCO, GeneList_parietal_ADADvsLOAD)), n23 =
length(intersect(GeneList_parietal_ADADvsLOAD, GeneList_parietal_ADADvsCO)), n13 =
length(intersect(GeneList_parietal_LOADvsCO, GeneList_parietal_ADADvsCO)),
  n123 = length(Reduce(intersect, list(GeneList_parietal_LOADvsCO, GeneList_parietal_ADADvsLOAD,
GeneList_parietal_ADADvsCO))), category = c("LOADvsCO", "ADADvsLOAD", "ADADvsCO"), lty = "blank",
  cex = 1.5,
  fontface = "bold",
  fontfamily = "sans",
  cat.cex = 1.5,
  cat.fontface = "bold",
  cat.default.pos = "outer",
  fill = c("skyblue", "pink1", "mediumorchid"))

```

```

#####
#####
## Check of consistency in direction of effect ADAD and LOAD ##
#####
#####

```

```
GeneList_parietal_LOADvsCO <- rownames(subset(res_parietal_condition_filter, padj < 0.05))
```

```
GeneList_parietal_ADADvsCO <- rownames(subset(res_parietalADAD_condition_filter_ADADvsCO, padj
< 0.05))
```

```
GeneList_parietal_ADADvsLOAD <-
rownames(subset(res_parietalADAD_conditionBraak_filter_ADADvsLOAD, padj < 0.05))
```

```
OverlapADAD_CO_ADAD_LOAD <-
cbind(res_parietalADAD_condition_filter_ADADvsCO[intersect(GeneList_parietal_ADADvsCO,
GeneList_parietal_ADADvsLOAD),]$log2FoldChange,
res_parietalADAD_conditionBraak_filter_ADADvsLOAD[intersect(GeneList_parietal_ADADvsCO,
GeneList_parietal_ADADvsLOAD),]$log2FoldChange)
OverlapADAD_CO_ADAD_LOAD <- cbind(OverlapADAD_CO_ADAD_LOAD, samesign=
as.data.frame(sign(OverlapADAD_CO_ADAD_LOAD[,1])==sign(OverlapADAD_CO_ADAD_LOAD[,2])))
OverlapADAD_CO_ADAD_LOAD <- cbind(OverlapADAD_CO_ADAD_LOAD, increasingSeverity=
as.data.frame(abs(OverlapADAD_CO_ADAD_LOAD[,1])>abs(OverlapADAD_CO_ADAD_LOAD[,2])))
```

```
cbind(res_parietal_condition_filter[Reduce(intersect, list(GeneList_parietal_LOADvsCO,
GeneList_parietal_ADADvsLOAD, GeneList_parietal_ADADvsCO)),]$log2FoldChange,
res_parietalADAD_condition_filter_ADADvsCO[Reduce(intersect, list(GeneList_parietal_LOADvsCO,
GeneList_parietal_ADADvsLOAD, GeneList_parietal_ADADvsCO)),]$log2FoldChange,
res_parietalADAD_conditionBraak_filter_ADADvsLOAD[Reduce(intersect,
list(GeneList_parietal_LOADvsCO, GeneList_parietal_ADADvsLOAD,
GeneList_parietal_ADADvsCO)),]$log2FoldChange)
```

```
```
```

## MSBB

```
#####
## Dube et al., 2019 - circRNAs in AD ##
#####
```

```
##Author: Umber Dube
##Contact: udube@wustl.edu
```

```
##Code Section: Replication Differential Expression Analyses
``{r}
```

```
#####
#####
## Replication in AMP_AD MSBB #####
#####
#####
```

```
AMP_AD_circDE <- function() {
```

```
##Load in circRNA count data generated by DCC##
```

```
circCoordinates_BM <- read.table("/home/dubeu/Synapse/AMP_AD/DCC/BM/CircCoordinates",
sep="\t", header=TRUE)
circCount_BM <- read.table("/home/dubeu/Synapse/AMP_AD/DCC/BM/CircRNACount", sep="\t",
header=TRUE)
LinearCount_BM <- read.table("/home/dubeu/Synapse/AMP_AD/DCC/BM/LinearCount", sep="\t",
header=TRUE)
```

```
##Filter the circRNAs based on linear ratios
```

```
rowIndex <- 1:nrow(circCount_BM)
```

```
circfiltered <- mclapply(rowIndex, circFILTER, circCount_BM, LinearCount_BM, Nreplicates = 1,
filter.sample = 3, filter.count = 3, percentage = 0.1, mc.cores = 50)
```

#remove Null via <https://stackoverflow.com/questions/26539441/remove-null-elements-from-list-of-lists/26540063>

```
circfiltered_BM <- unlist(Filter(Negate(function(x) is.null(unlist(x))), circfiltered))
```

```
circCount_BM <- circCount_BM[-circfiltered_BM,]
```

```
circCoordinates_BM_filter <- circCoordinates_BM[-circfiltered_BM,]
```

```
circCoordinates_BM_filter_parietal <- merge(circCoordinates_BM_filter,  
circCoordinates_parietal_filter, by=c("Chr", "Start", "End"))
```

```
circCoordinates_BM_filter_parietal <-  
circCoordinates_BM_filter_parietal[circCoordinates_BM_filter_parietal$Gene.x !=  
circCoordinates_BM_filter_parietal$Gene.y,]
```

```
circCoordinates_BM_filter_parietal <-  
circCoordinates_BM_filter_parietal[,c("Chr", "Start", "End", "Gene.y")]
```

```
circCoordinates_BM_filter$rownum <- row.names(circCoordinates_BM_filter)
```

```
circCoordinates_BM_filter <- merge(circCoordinates_BM_filter,  
circCoordinates_BM_filter_parietal, by=c("Chr", "Start", "End"), all.x=TRUE)  
circCoordinates_BM_filter$Gene <- as.character(circCoordinates_BM_filter$Gene)
```

```
circCoordinates_BM_filter[!is.na(circCoordinates_BM_filter$Gene.y),]$Gene <-  
circCoordinates_BM_filter[!is.na(circCoordinates_BM_filter$Gene.y),]$Gene.y
```

```
circCoordinates_BM_filter$Gene <- as.factor(circCoordinates_BM_filter$Gene)  
row.names(circCoordinates_BM_filter) <- circCoordinates_BM_filter$rownum
```

```
#Fix non-filtered
```

```
circCoordinates_BM$rownum <- row.names(circCoordinates_BM)
```

```
circCoordinates_BM <- merge(circCoordinates_BM,  
circCoordinates_BM_filter_parietal, by=c("Chr", "Start", "End"), all.x=TRUE)  
circCoordinates_BM$Gene <- as.character(circCoordinates_BM$Gene)
```

```
circCoordinates_BM[!is.na(circCoordinates_BM$Gene.y),]$Gene <-  
circCoordinates_BM[!is.na(circCoordinates_BM$Gene.y),]$Gene.y
```

```

circCoordinates_BM$Gene <- as.factor(circCoordinates_BM$Gene)
row.names(circCoordinates_BM) <- circCoordinates_BM$rownum

##Remove extraneous columns
circCount_BM <- circCount_BM[,4:ncol(circCount_BM)]

#Process names
names(circCount_BM) <- gsub("_Chimeric.out.junction", "", names(circCount_BM))

#Aggregate on genes names removing the not_annotated
circCount_BM$Gene <- circCoordinates_BM[rownames(circCount_BM),]$Gene
circCount_BM <- subset(circCount_BM, Gene != "not_annotated")
mydat.max_BM <- aggregate(. ~ Gene, data = circCount_BM, sum)
rownames(mydat.max_BM) <- mydat.max_BM$Gene
mydat.max_BM$Gene <- NULL
cts_BM <- mydat.max_BM
rownames(cts_BM) <- paste0("circ", rownames(cts_BM))

##Load in phenotype data ##
coldata_BM <- read.csv(file="/home/dubeu/Synapse/AMP_AD/MSBB_Pheno_05_15_2018.csv",
header=TRUE, na.strings = "NA")
coldata_BM <- subset(coldata_BM, BrodmannArea=="BM")

##Set factor levels

coldata_BM$NP.1 <- factor(coldata_BM$NP.1, levels=c('1','2','3','4'))
coldata_BM$Apo1 <- factor(coldata_BM$Apo1, levels=c('0','2','3','4'))
coldata_BM$Apo2 <- factor(coldata_BM$Apo2, levels=c('0','2','3','4'))
coldata_BM$RACE <- factor(coldata_BM$RACE, levels=c('A','B','H','W','U'))
coldata_BM$RACE <- relevel(coldata_BM$RACE, "W")
coldata_BM$SEX <- factor(coldata_BM$SEX, levels = c("M","F"))
coldata_BM$batch <- factor(coldata_BM$batch, levels = levels(coldata_BM$batch))

rownames(coldata_BM) <- coldata_BM$sampleIdentifier

##Relevel NP.1
#levels(coldata_BM$NP.1) <- list("1"=c("1"), "2"=c("2","3","4"))

coldata_BM[(as.character(coldata_BM$NP.1)=="1" & coldata_BM$CDR>=1),]$DementedControl <- 1

cts_BM <- cts_BM[, rownames(coldata_BM)]

##DE based on condition ##

```

```

#####
## Filtering QC ##
## via: https://support.bioconductor.org/p/65256/ ##
## triplicate by lowest number: https://support.bioconductor.org/p/49710/ ##
#####

dds_BM_condition_filter <- DESeqDataSetFromMatrix(countData = cts_BM, colData = coldata_BM,
design = ~ 1)

dds_BM_condition_filter <- estimateSizeFactors(dds_BM_condition_filter)

#Remove individuals with missing data
dds_BM_condition_filter <- dds_BM_condition_filter[, !is.na(dds_BM_condition_filter$batch)]
dds_BM_condition_filter <- dds_BM_condition_filter[, !is.na(dds_BM_condition_filter$PC1)]
dds_BM_condition_filter <- dds_BM_condition_filter[, !is.na(dds_BM_condition_filter$PC2)]

#Remove dementedcontrols
dds_BM_condition_filter <- dds_BM_condition_filter[, !(dds_BM_condition_filter$DementedControl
== 1)]

dds_BM_condition_filter$batch <- droplevels(dds_BM_condition_filter$batch)

design(dds_BM_condition_filter) = formula(~ PMI + TIN.median. + AOD + batch + SEX + PC1 + PC2 +
NP.1)

dds_BM_final_condition_filter <- DESeq(dds_BM_condition_filter, parallel = TRUE, betaPrior = FALSE)

res_BM_condition_filter <- results(dds_BM_final_condition_filter, contrast=c("NP.1", "2", "1"), alpha =
0.05)
summary(res_BM_condition_filter)

##DE based on CDR ##

#####
## Filtering QC ##
## via: https://support.bioconductor.org/p/65256/ ##
## triplicate by lowest number: https://support.bioconductor.org/p/49710/ ##
#####

```

```

dds_BM_CDR_filter <- DESeqDataSetFromMatrix(countData = cts_BM, colData = coldata_BM, design =
~ 1)

dds_BM_CDR_filter <- estimateSizeFactors(dds_BM_CDR_filter)

#Remove individuals with missing data
dds_BM_CDR_filter <- dds_BM_CDR_filter[, !is.na(dds_BM_CDR_filter$batch)]
dds_BM_CDR_filter <- dds_BM_CDR_filter[, !is.na(dds_BM_CDR_filter$PC1)]
dds_BM_CDR_filter <- dds_BM_CDR_filter[, !is.na(dds_BM_CDR_filter$PC2)]

dds_BM_CDR_filter <- dds_BM_CDR_filter[, !is.na(dds_BM_CDR_filter$CDR)]

#Remove dementedcontrols
dds_BM_CDR_filter <- dds_BM_CDR_filter[, !(dds_BM_CDR_filter$DementedControl == 1)]

dds_BM_CDR_filter$batch <- droplevels(dds_BM_CDR_filter$batch)

design(dds_BM_CDR_filter) = formula(~ PMI + TIN.median. + AOD + batch + SEX + PC1 + PC2 + CDR)

dds_BM_final_CDR_filter <- DESeq(dds_BM_CDR_filter, parallel = TRUE, betaPrior = FALSE)

res_BM_CDR_filter <- results(dds_BM_final_CDR_filter, alpha = 0.05)
summary(res_BM_CDR_filter)

##DE based on braak ##

#####
## Filtering QC ##
## via: https://support.bioconductor.org/p/65256/ ##
## triplicate by lowest number: https://support.bioconductor.org/p/49710/ ##
#####

dds_BM_braak_filter <- DESeqDataSetFromMatrix(countData = cts_BM, colData = coldata_BM, design
= ~ 1)

dds_BM_braak_filter <- estimateSizeFactors(dds_BM_braak_filter)

#Remove individuals with missing data
dds_BM_braak_filter <- dds_BM_braak_filter[, !is.na(dds_BM_braak_filter$batch)]

```



```

dds_BM_braak_filter <- dds_BM_braak_filter[ ,!is.na(dds_BM_braak_filter$PC1)]
dds_BM_braak_filter <- dds_BM_braak_filter[ ,!is.na(dds_BM_braak_filter$PC2)]

dds_BM_braak_filter <- dds_BM_braak_filter[ ,!is.na(dds_BM_braak_filter$bbscore)]

#Remove dementedcontrols
dds_BM_braak_filter <- dds_BM_braak_filter[ ,(dds_BM_braak_filter$DementedControl == 1)]

dds_BM_braak_filter$batch <- droplevels(dds_BM_braak_filter$batch)

design(dds_BM_braak_filter) = formula( ~ PMI + TIN.median. + AOD + batch + SEX + PC1 + PC2 +
bbscore)

dds_BM_final_braak_filter <- DESeq(dds_BM_braak_filter, parallel = TRUE, betaPrior = FALSE)

res_BM_braak_filter <- results(dds_BM_final_braak_filter, alpha = 0.05)
summary(res_BM_braak_filter)

##DE based on PlaqueMean ##

#####
## Filtering QC ##
## via: https://support.bioconductor.org/p/65256/ ##
## triplicate by lowest number: https://support.bioconductor.org/p/49710/ ##
#####

dds_BM_PlaqueMean_filter <- DESeqDataSetFromMatrix(countData = cts_BM, colData = coldata_BM,
design = ~ 1)

dds_BM_PlaqueMean_filter <- estimateSizeFactors(dds_BM_PlaqueMean_filter)

#Remove individuals with missing data
dds_BM_PlaqueMean_filter <- dds_BM_PlaqueMean_filter[
,!is.na(dds_BM_PlaqueMean_filter$batch)]
dds_BM_PlaqueMean_filter <- dds_BM_PlaqueMean_filter[ ,!is.na(dds_BM_PlaqueMean_filter$PC1)]
dds_BM_PlaqueMean_filter <- dds_BM_PlaqueMean_filter[ ,!is.na(dds_BM_PlaqueMean_filter$PC2)]

dds_BM_PlaqueMean_filter <- dds_BM_PlaqueMean_filter[
,!is.na(dds_BM_PlaqueMean_filter$PlaqueMean)]

```

```

#Remove dementedcontrols
dds_BM_PlaqueMean_filter <- dds_BM_PlaqueMean_filter[,
!(dds_BM_PlaqueMean_filter$DementedControl == 1)]

dds_BM_PlaqueMean_filter$batch <- droplevels(dds_BM_PlaqueMean_filter$batch)

design(dds_BM_PlaqueMean_filter) = formula( ~ PMI + TIN.median. + AOD + batch + SEX + PC1 + PC2 +
PlaquesMean)

dds_BM_final_PlaqueMean_filter <- DESeq(dds_BM_PlaqueMean_filter, parallel = TRUE, betaPrior =
FALSE)

res_BM_PlaqueMean_filter <- results(dds_BM_final_PlaqueMean_filter, alpha = 0.05)
summary(res_BM_PlaqueMean_filter)
}

##BM10
AMP_AD_circDE_BM10 <- gsub("BM", "BM10", as.list(body(AMP_AD_circDE)))
#Replace first line to create function
AMP_AD_circDE_BM10[1] <- "AMP_AD_circDE_BM10 <- function() {"
#Add last line to end function
AMP_AD_circDE_BM10[length(AMP_AD_circDE_BM10)+1] <- "}"
write(AMP_AD_circDE_BM10, "/home/dubeu/Synapse/AMP_AD_circDE_BM10.R")

##BM22
AMP_AD_circDE_BM22 <- gsub("BM", "BM22", as.list(body(AMP_AD_circDE)))
#Replace first line to create function
AMP_AD_circDE_BM22[1] <- "AMP_AD_circDE_BM22 <- function() {"
#Add last line to end function
AMP_AD_circDE_BM22[length(AMP_AD_circDE_BM22)+1] <- "}"
write(AMP_AD_circDE_BM22, "/home/dubeu/Synapse/AMP_AD_circDE_BM22.R")

##BM36
AMP_AD_circDE_BM36 <- gsub("BM", "BM36", as.list(body(AMP_AD_circDE)))
#Replace first line to create function
AMP_AD_circDE_BM36[1] <- "AMP_AD_circDE_BM36 <- function() {"
#Add last line to end function
AMP_AD_circDE_BM36[length(AMP_AD_circDE_BM36)+1] <- "}"

```

```
write(AMP_AD_circDE_BM36, "/home/dubeu/Synapse/AMP_AD_circDE_BM36.R")
```

```
##BM44
```

```
AMP_AD_circDE_BM44 <- gsub("BM", "BM44", as.list(body(AMP_AD_circDE)))
```

```
#Replace first line to create function
```

```
AMP_AD_circDE_BM44[1] <- "AMP_AD_circDE_BM44 <- function() {"
```

```
#Add last line to end function
```

```
AMP_AD_circDE_BM44[length(AMP_AD_circDE_BM44)+1] <- "}"
```

```
write(AMP_AD_circDE_BM44, "/home/dubeu/Synapse/AMP_AD_circDE_BM44.R")
```

```
source('/home/dubeu/Synapse/AMP_AD_circDE_BM10.R')
```

```
source('/home/dubeu/Synapse/AMP_AD_circDE_BM22.R')
```

```
source('/home/dubeu/Synapse/AMP_AD_circDE_BM36.R')
```

```
source('/home/dubeu/Synapse/AMP_AD_circDE_BM44.R')
```

```
#Run the actual code
```

```
AMP_AD_circDE_BM10()
```

```
AMP_AD_circDE_BM22()
```

```
AMP_AD_circDE_BM36()
```

```
AMP_AD_circDE_BM44()
```

```
...
```

## Regression-Based circRNA Association Independence Analyses

```
#####
```

```
## Dube et al., 2019 - circRNAs in AD ##
```

```
#####
```

```
##Author: Umber Dube
```

```
##Contact: udube@wustl.edu
```

```
##Code Section: Regression Based Independence Analyses
```

```
Independence from AD-associated cognate linear mRNA changes
```

```
#####Linear Independence
```

```
``{r}
```

```
sigList_BM44_CDR = subset(as.data.frame(both_CDR_BM44), i_adjpv < 0.05)
```

```
sigList_BM44_CDR = sigList_BM44_CDR[order(sigList_BM44_CDR$i_adjpv),]
```

```
sigList_BM44_CDR = rownames(sigList_BM44_CDR)
```

```
#sigList_BM44_CDR_top <- head(sigList_BM44_CDR, n = 11)
```

```
sigList_BM44_CDR_top <- sigList_BM44_CDR
```

```
##Have to remove circRNAs for which there are no linear
```

```

sigList_BM44_CDR_top <-
paste0("circ",colnames(t(na.omit(norm_BM44_salmon_CDR_counts_regress[gsub("circ","",sigList_BM4
4_CDR_top),])))

LinearCircTable_BM44 <- data.frame()

for (i in sigList_BM44_CDR_top) {

  print(i)

  print(match(i,sigList_BM44_CDR_top)/length(sigList_BM44_CDR_top))

  Gene_BM44_CDR <- t(norm_BM44_CDR_counts[i,])
  Gene_BM44_CDR_linear <- t(norm_BM44_salmon_CDR_counts[i,])

  regress_BM44_CDR <- cbind(coldata_BM44[rownames(Gene_BM44_CDR),], Gene =
t(norm_BM44_CDR_counts[i,]), Linear = t(norm_BM44_salmon_CDR_counts[gsub("circ","",i),]))

  model_regress_BM44_CDR_circ = lm(CDR ~ regress_BM44_CDR[,i] + PMI + TIN.median. + AOD +
batch + SEX + PC1+PC2, data=regress_BM44_CDR )

  print(summary(model_regress_BM44_CDR_circ))

  model_regress_BM44_CDR_linear = lm(CDR ~ regress_BM44_CDR[,gsub("circ","",i)] + PMI +
TIN.median. + AOD + batch + SEX + PC1+PC2, data=regress_BM44_CDR )

  print(summary(model_regress_BM44_CDR_linear))

  model_regress_BM44_CDR_both = lm(CDR ~ regress_BM44_CDR[,i] +
regress_BM44_CDR[,gsub("circ","",i)] + PMI + TIN.median. + AOD + batch + SEX + PC1+PC2,
data=regress_BM44_CDR )
  model_regress_BM44_CDR_both_correlation <-
cor.test(regress_BM44_CDR[,i],regress_BM44_CDR[,gsub("circ","",i)], method="spearman")
  print(summary(model_regress_BM44_CDR_both))

  library(relaimpo)

  LinearCircTable_BM44 <-
rbind(LinearCircTable_BM44,cbind(as.character(i),summary(model_regress_BM44_CDR_linear)$coeffici
ents[2,1],summary(model_regress_BM44_CDR_linear)$coefficients[2,2],summary(model_regress_BM4
4_CDR_linear)$coefficients[2,4],"",summary(model_regress_BM44_CDR_circ)$coefficients[2,1],summar
y(model_regress_BM44_CDR_circ)$coefficients[2,2],summary(model_regress_BM44_CDR_circ)$coeffici
ents[2,4],"",model_regress_BM44_CDR_both_correlation$estimate,"",summary(model_regress_BM44_
CDR_both)$coefficients[3,1],summary(model_regress_BM44_CDR_both)$coefficients[3,2],summary(mo

```

```

del_regress_BM44_CDR_both)$coefficients[3,4], "", summary(model_regress_BM44_CDR_both)$coefficients[2,1], summary(model_regress_BM44_CDR_both)$coefficients[2,2], summary(model_regress_BM44_CDR_both)$coefficients[2,4], "", (calc.relimp(model_regress_BM44_CDR_both, type = c("lmg")), rela = FALSE))$lmg[2], (calc.relimp(model_regress_BM44_CDR_both, type = c("lmg")), rela = FALSE))$lmg[3]))
}

colnames(LinearCircTable_BM44) <-
c("RNA", "LinearEstimate", "LinearSE", "LinearPvalue", "", "CircEstimate", "CircSE", "CircPvalue", "", "Corr", "",
"BothLinearEstimate", "BothLinearSE", "BothLinearPvalue", "", "BothCircEstimate", "BothCircSE", "BothCirc
Pvalue", "", "RelaimpoCirc", "RelaimpoLinear")

##Change all factors to numeric
LinearCircTable_BM44[] <- lapply(LinearCircTable_BM44, function(x) as.numeric(as.character(x)))
##Recover RNA
LinearCircTable_BM44$RNA <- gsub("circ", "", as.character(sigList_BM44_CDR_top))

sigList_parietal_CDR = subset(as.data.frame(both_CDR_BM44), i_adjpv < 0.05)
sigList_parietal_CDR = sigList_parietal_CDR[order(sigList_parietal_CDR$i_adjpv),]
sigList_parietal_CDR = rownames(sigList_parietal_CDR)
sigList_parietal_CDR_top <- sigList_parietal_CDR
sigList_parietal_CDR_top <-
paste0("circ", colnames(t(na.omit(norm_BM44_salmon_CDR_counts_regress[gsub("circ", "", sigList_BM44_CDR_top), ]))))

LinearCircTable_parietal <- data.frame()
for (i in sigList_parietal_CDR_top) {
  print(i)
  print(match(i, sigList_parietal_CDR_top)/length(sigList_parietal_CDR_top))
  Gene_parietal_CDR <- t(norm_parietal_CDR_counts[i,])
  Gene_parietal_CDR_linear <- t(norm_parietal_salmon_CDR_counts[i,])
  regress_parietal_CDR <- cbind(coldata_parietal[rownames(Gene_parietal_CDR),], Gene =
t(norm_parietal_CDR_counts[i,]), Linear = t(norm_parietal_salmon_CDR_counts[gsub("circ", "", i), ]))
  Gene_archive_parietal_CDR <- cbind(Gene_archive_parietal_CDR,
as.data.frame(t(norm_parietal_CDR_counts_regress[i, ])))
  model_regress_parietal_CDR_circ = lm(CDR_e ~ regress_parietal_CDR[,i] + PMI + TIN.median. +
AGE_at_death + pool + GENDER + PC1+PC2, data=regress_parietal_CDR )
  print(summary(model_regress_parietal_CDR_circ))
  model_regress_parietal_CDR_linear = lm(CDR_e ~ regress_parietal_CDR[,gsub("circ", "", i)] + PMI
+ TIN.median. + AGE_at_death + pool + GENDER + PC1+PC2, data=regress_parietal_CDR )
  print(summary(model_regress_parietal_CDR_linear))
}

```

```

model_regress_parietal_CDR_both = lm(CDR_e ~ regress_parietal_CDR[,i] +
regress_parietal_CDR[,gsub("circ","",i)] + PMI + TIN.median. + AGE_at_death + pool + GENDER +
PC1+PC2, data=regress_parietal_CDR )
model_regress_parietal_CDR_both_correlation <-
cor.test(regress_parietal_CDR[,i],regress_parietal_CDR[,gsub("circ","",i)], method="spearman")
print(summary(model_regress_parietal_CDR_both))
library(relaimpo)
LinearCircTable_parietal <-
rbind(LinearCircTable_parietal,cbind(as.character(i),summary(model_regress_parietal_CDR_linear)$coef
ficients[2,1],summary(model_regress_parietal_CDR_linear)$coefficients[2,2],summary(model_regress_
parietal_CDR_linear)$coefficients[2,4],"",summary(model_regress_parietal_CDR_circ)$coefficients[2,1],
summary(model_regress_parietal_CDR_circ)$coefficients[2,2],summary(model_regress_parietal_CDR_c
irc)$coefficients[2,4],"",model_regress_parietal_CDR_both_correlation$estimate,"",summary(model_re
gress_parietal_CDR_both)$coefficients[3,1],summary(model_regress_parietal_CDR_both)$coefficients[
3,2],summary(model_regress_parietal_CDR_both)$coefficients[3,4],"",summary(model_regress_parieta
l_CDR_both)$coefficients[2,1],summary(model_regress_parietal_CDR_both)$coefficients[2,2],summary(
model_regress_parietal_CDR_both)$coefficients[2,4],"",(calc.relimp(model_regress_parietal_CDR_both,
type = c("lmg")), rela = FALSE))$lmg[1],(calc.relimp(model_regress_parietal_CDR_both, type = c("lmg"),
rela = FALSE))$lmg[2]))
}
colnames(LinearCircTable_parietal) <-
c("RNA","LinearEstimate","LinearSE","LinearPvalue","", "CircEstimate","CircSE","CircPvalue","", "Corr","",
"BothLinearEstimate","BothLinearSE","BothLinearPvalue","", "BothCircEstimate","BothCircSE","BothCirc
Pvalue","", "RelaimpoCirc","RelaimpoLinear")
##Change all factors to numeric
LinearCircTable_parietal[] <- lapply(LinearCircTable_parietal, function(x) as.numeric(as.character(x)))
##Recover RNA
LinearCircTable_parietal$RNA <- gsub("circ","",as.character(sigList_parietal_CDR_top))
##Generate a table
LinearCircTable_parietal_table <- LinearCircTable_parietal
LinearCircTable_parietal_table$LinearEstimate <-
formatC(LinearCircTable_parietal_table$LinearEstimate, format = "f", digits = 2)
LinearCircTable_parietal_table$LinearPvalue <- formatC(LinearCircTable_parietal_table$LinearPvalue,
format = "e", digits = 2)
LinearCircTable_parietal_table$CircEstimate <- formatC(LinearCircTable_parietal_table$CircEstimate,
format = "f", digits = 2)
LinearCircTable_parietal_table$CircPvalue <- formatC(LinearCircTable_parietal_table$CircPvalue, format
= "e", digits = 2)
LinearCircTable_parietal_table$RelaimpoCirc <- formatC(LinearCircTable_parietal_table$RelaimpoCirc,
format = "e", digits = 2)
LinearCircTable_parietal_table$RelaimpoLinear <-
formatC(LinearCircTable_parietal_table$RelaimpoLinear, format = "e", digits = 2)
LinearCircTable_parietal_table$BothLinearEstimate <-
formatC(LinearCircTable_parietal_table$BothLinearEstimate, format = "f", digits = 2)

```

```

LinearCircTable_parietal_table$BothLinearPvalue <-
formatC(LinearCircTable_parietal_table$BothLinearPvalue, format = "e", digits = 2)
LinearCircTable_parietal_table$BothCircEstimate <-
formatC(LinearCircTable_parietal_table$BothCircEstimate, format = "f", digits = 2)
LinearCircTable_parietal_table$BothCircPvalue <-
formatC(LinearCircTable_parietal_table$BothCircPvalue, format = "e", digits = 2)
LinearCircTable_parietal_table$Corr <- formatC(LinearCircTable_parietal_table$Corr, format = "f", digits
= 2)
LinearCircTable_parietal_table <- as.data.frame(lapply(LinearCircTable_parietal_table, function(x)
gsub("e", " × 10",x) ))
colnames(LinearCircTable_parietal_table) <-
c("RNA","LinearEstimate","LinearPvalue","", "CircEstimate","CircPvalue","", "Corr","", "BothLinearEstimat
e","BothLinearPvalue","", "BothCircEstimate","BothCircPvalue","", "RelaimpoCirc","RelaimpoLinear")

#FE metafor
library(metafor)
meta_results <- function(x,parietalEst,BM44Est,parietalSE,BM44SE) {
Estimate <- c(parietalEst[x],BM44Est[x])
SE <- c(parietalSE[x],BM44SE[x])
rma(yi=Estimate,sei=SE, method="FE")$pval
}
LinearCircTable_meta <-
LinearCircTable_parietal[,c("RNA","LinearPvalue","CircPvalue","BothLinearPvalue","BothCircPvalue")]
LinearCircTable_meta$LinearPvalue <- as.numeric(unlist(mclapply(1:nrow(LinearCircTable_parietal),
meta_results, mc.cores=5, parietalEst=LinearCircTable_parietal$LinearEstimate,
BM44Est=LinearCircTable_BM44$LinearEstimate,parietalSE=LinearCircTable_parietal$LinearSE,
BM44SE=LinearCircTable_BM44$LinearSE)))
LinearCircTable_meta$CircPvalue <- as.numeric(unlist(mclapply(1:nrow(LinearCircTable_parietal),
meta_results, mc.cores=5, parietalEst=LinearCircTable_parietal$CircEstimate,
BM44Est=LinearCircTable_BM44$CircEstimate,parietalSE=LinearCircTable_parietal$CircSE,
BM44SE=LinearCircTable_BM44$CircSE)))
LinearCircTable_meta$BothLinearPvalue <-
as.numeric(unlist(mclapply(1:nrow(LinearCircTable_parietal), meta_results, mc.cores=5,
parietalEst=LinearCircTable_parietal$LinearEstimate,
BM44Est=LinearCircTable_BM44$LinearEstimate,parietalSE=LinearCircTable_parietal$BothLinearSE,
BM44SE=LinearCircTable_BM44$BothLinearSE)))
LinearCircTable_meta$BothCircPvalue <- as.numeric(unlist(mclapply(1:nrow(LinearCircTable_parietal),
meta_results, mc.cores=5, parietalEst=LinearCircTable_parietal$BothCircEstimate,
BM44Est=LinearCircTable_BM44$BothCircEstimate,parietalSE=LinearCircTable_parietal$BothCircSE,
BM44SE=LinearCircTable_BM44$BothCircSE)))
##Add the average correlation between discovery and replication
LinearCircTable_meta$AvgCorr <-
rowMeans(cbind(LinearCircTable_parietal$Corr,LinearCircTable_BM44$Corr))

```

```
LinearCircTable_meta$AvgRelaimpoCirc <-
rowMeans(cbind(LinearCircTable_parietal$RelaimpoCirc,LinearCircTable_BM44$RelaimpoCirc))
LinearCircTable_meta$AvgRelaimpoLinear <-
rowMeans(cbind(LinearCircTable_parietal$RelaimpoLinear,LinearCircTable_BM44$RelaimpoLinear))
```

...

## Independence from AD-associated cell-type proportion changes

```
#####Cell type proportion change independence
```

```
`{r}
```

```
sigList_BM44_CDR = subset(as.data.frame(both_CDR_BM44), i_adjpv < 0.05)
sigList_BM44_CDR = sigList_BM44_CDR[order(sigList_BM44_CDR$i_adjpv),]
sigList_BM44_CDR = rownames(sigList_BM44_CDR)
#sigList_BM44_CDR_top <- head(sigList_BM44_CDR, n = 11)
sigList_BM44_CDR_top <- sigList_BM44_CDR
```

```
NeuronCircTable_BM44 <- data.frame()
```

```
for (i in sigList_BM44_CDR_top) {
```

```
  print(i)
```

```
  print(match(i,sigList_BM44_CDR_top)/length(sigList_BM44_CDR_top))
```

```
  Gene_BM44_CDR <- t(norm_BM44_CDR_counts[i,])
```

```
  Gene_BM44_CDR_neuron <- t(norm_BM44_salmon_CDR_counts[i,])
```

```
  regress_BM44_CDR <- cbind(coldata_BM44[rownames(Gene_BM44_CDR),], Gene =
t(norm_BM44_CDR_counts[i,]), Linear = t(norm_BM44_salmon_CDR_counts[gsub("circ","",i)]))
```

```
  model_regress_BM44_CDR_circ = lm(CDR ~ regress_BM44_CDR[,i] + PMI + TIN.median. + AOD +
batch + SEX + PC1+PC2, data=regress_BM44_CDR )
```

```
  print(summary(model_regress_BM44_CDR_circ))
```

```
  model_regress_BM44_CDR_neuron = lm(CDR ~ Neuron + Oligodendrocyte + Microglia + PMI +
TIN.median. + AOD + batch + SEX + PC1+PC2, data=regress_BM44_CDR )
```

```
  print(summary(model_regress_BM44_CDR_neuron))
```

```
  model_regress_BM44_CDR_both = lm(CDR ~ regress_BM44_CDR[,i] + Neuron +
Oligodendrocyte + Microglia + PMI + TIN.median. + AOD + batch + SEX + PC1+PC2,
data=regress_BM44_CDR )
```



```

print(summary(model_regress_BM44_CDR_both))

neuron_effect <- summary(model_regress_BM44_CDR_neuron)$coefficients[2,1]
neuron_SE <- summary(model_regress_BM44_CDR_neuron)$coefficients[2,2]
neuron_pval <- summary(model_regress_BM44_CDR_neuron)$coefficients[2,4]
oligo_effect <- summary(model_regress_BM44_CDR_neuron)$coefficients[3,1]
oligo_SE <- summary(model_regress_BM44_CDR_neuron)$coefficients[3,2]
oligo_pval <- summary(model_regress_BM44_CDR_neuron)$coefficients[3,4]
micro_effect <- summary(model_regress_BM44_CDR_neuron)$coefficients[4,1]
micro_SE <- summary(model_regress_BM44_CDR_neuron)$coefficients[4,2]
micro_pval <- summary(model_regress_BM44_CDR_neuron)$coefficients[4,4]

circ_effect <- summary(model_regress_BM44_CDR_circ)$coefficients[2,1]
circ_SE <- summary(model_regress_BM44_CDR_circ)$coefficients[2,2]
circ_pval <- summary(model_regress_BM44_CDR_circ)$coefficients[2,4]

bothneuron_effect <- summary(model_regress_BM44_CDR_both)$coefficients[3,1]
bothneuron_SE <- summary(model_regress_BM44_CDR_both)$coefficients[3,2]
bothneuron_pval <- summary(model_regress_BM44_CDR_both)$coefficients[3,4]
botholigo_effect <- summary(model_regress_BM44_CDR_both)$coefficients[4,1]
botholigo_SE <- summary(model_regress_BM44_CDR_both)$coefficients[4,2]
botholigo_pval <- summary(model_regress_BM44_CDR_both)$coefficients[4,4]
bothmicro_effect <- summary(model_regress_BM44_CDR_both)$coefficients[5,1]
bothmicro_SE <- summary(model_regress_BM44_CDR_both)$coefficients[5,2]
bothmicro_pval <- summary(model_regress_BM44_CDR_both)$coefficients[5,4]

bothcirc_effect <- summary(model_regress_BM44_CDR_both)$coefficients[2,1]
bothcirc_SE <- summary(model_regress_BM44_CDR_both)$coefficients[2,2]
bothcirc_pval <- summary(model_regress_BM44_CDR_both)$coefficients[2,4]

NeuronCircTable_BM44 <-
rbind(NeuronCircTable_BM44,cbind(as.character(i),neuron_effect,neuron_SE,neuron_pval,"",oligo_effec
ct,oligo_SE,oligo_pval,"",micro_effect,micro_SE,micro_pval,"",circ_effect,circ_SE,circ_pval,"",bothneuro
n_effect,bothneuron_SE,bothneuron_pval,"",botholigo_effect,botholigo_SE,botholigo_pval,"",bothmicr
o_effect,bothmicro_SE,bothmicro_pval,"",bothcirc_effect,bothcirc_SE,bothcirc_pval))

}

colnames(NeuronCircTable_BM44) <-
c("RNA","NeuronEstimate","NeuronSE","NeuronPvalue","", "OligoEstimate","OligoSE","OligoPvalue","", "
MicroEstimate","MicroSE","MicroPvalue","", "CircEstimate","CircSE","CircPvalue","", "BothNeuronEstima
te","BothNeuronSE","BothNeuronPvalue","", "BothOligoEstimate","BothOligoSE","BothOligoPvalue","", "

```

```
BothMicroEstimate","BothMicroSE","BothMicroPvalue","", "BothCircEstimate","BothCircSE","BothCircPv  
alue")
```

```
##Change all factors to numeric
```

```
NeuronCircTable_BM44[] <- lapply(NeuronCircTable_BM44, function(x) as.numeric(as.character(x)))
```

```
##Recover RNA
```

```
NeuronCircTable_BM44$RNA <- gsub("circ","",as.character(sigList_BM44_CDR_top))
```

```
#####  
#####  
#####  
#####
```

```
sigList_parietal_CDR = subset(as.data.frame(both_CDR_BM44), i_adjpv < 0.05)
```

```
sigList_parietal_CDR = sigList_parietal_CDR[order(sigList_parietal_CDR$i_adjpv),]
```

```
sigList_parietal_CDR = rownames(sigList_parietal_CDR)
```

```
#sigList_parietal_CDR_top <- head(sigList_parietal_CDR, n = 11)
```

```
sigList_parietal_CDR_top <- sigList_parietal_CDR
```

```
NeuronCircTable_parietal <- data.frame()
```

```
for (i in sigList_BM44_CDR_top) {
```

```
  print(i)
```

```
  print(match(i,sigList_parietal_CDR_top)/length(sigList_parietal_CDR_top))
```

```
  Gene_parietal_CDR <- t(norm_parietal_CDR_counts[i,])
```

```
  Gene_parietal_CDR_neuron <- t(norm_parietal_salmon_CDR_counts[i,])
```

```
  regress_parietal_CDR <- cbind(coldata_parietal[rownames(Gene_parietal_CDR),], Gene =  
t(norm_parietal_CDR_counts[i,]), Linear = t(norm_parietal_salmon_CDR_counts[gsub("circ","",i),]))
```

```
  model_regress_parietal_CDR_circ = lm(CDR_e ~ regress_parietal_CDR[,i] + PMI + TIN.median. +  
AGE_at_death + pool + GENDER + PC1+PC2, data=regress_parietal_CDR )
```

```
  print(summary(model_regress_parietal_CDR_circ))
```

```
  model_regress_parietal_CDR_neuron = lm(CDR_e ~ Neuron + Oligodendrocyte + Microglia +  
PMI + TIN.median. + AGE_at_death + pool + GENDER + PC1+PC2, data=regress_parietal_CDR )
```

```
  print(summary(model_regress_parietal_CDR_neuron))
```

```

model_regress_parietal_CDR_both = lm(CDR_e ~ regress_parietal_CDR[,i] + Neuron +
Oligodendrocyte + Microglia + PMI + TIN.median. + AGE_at_death + pool + GENDER + PC1+PC2,
data=regress_parietal_CDR )

```

```

print(summary(model_regress_parietal_CDR_both))

```

```

neuron_effect <- summary(model_regress_parietal_CDR_neuron)$coefficients[2,1]
neuron_SE <- summary(model_regress_parietal_CDR_neuron)$coefficients[2,2]
neuron_pval <- summary(model_regress_parietal_CDR_neuron)$coefficients[2,4]
oligo_effect <- summary(model_regress_parietal_CDR_neuron)$coefficients[3,1]
oligo_SE <- summary(model_regress_parietal_CDR_neuron)$coefficients[3,2]
oligo_pval <- summary(model_regress_parietal_CDR_neuron)$coefficients[3,4]
micro_effect <- summary(model_regress_parietal_CDR_neuron)$coefficients[4,1]
micro_SE <- summary(model_regress_parietal_CDR_neuron)$coefficients[4,2]
micro_pval <- summary(model_regress_parietal_CDR_neuron)$coefficients[4,4]

```

```

circ_effect <- summary(model_regress_parietal_CDR_circ)$coefficients[2,1]
circ_SE <- summary(model_regress_parietal_CDR_circ)$coefficients[2,2]
circ_pval <- summary(model_regress_parietal_CDR_circ)$coefficients[2,4]

```

```

bothneuron_effect <- summary(model_regress_parietal_CDR_both)$coefficients[3,1]
bothneuron_SE <- summary(model_regress_parietal_CDR_both)$coefficients[3,2]
bothneuron_pval <- summary(model_regress_parietal_CDR_both)$coefficients[3,4]
botholigo_effect <- summary(model_regress_parietal_CDR_both)$coefficients[4,1]
botholigo_SE <- summary(model_regress_parietal_CDR_both)$coefficients[4,2]
botholigo_pval <- summary(model_regress_parietal_CDR_both)$coefficients[4,4]
bothmicro_effect <- summary(model_regress_parietal_CDR_both)$coefficients[5,1]
bothmicro_SE <- summary(model_regress_parietal_CDR_both)$coefficients[5,2]
bothmicro_pval <- summary(model_regress_parietal_CDR_both)$coefficients[5,4]

```

```

bothcirc_effect <- summary(model_regress_parietal_CDR_both)$coefficients[2,1]
bothcirc_SE <- summary(model_regress_parietal_CDR_both)$coefficients[2,2]
bothcirc_pval <- summary(model_regress_parietal_CDR_both)$coefficients[2,4]

```

```

NeuronCircTable_parietal <-

```

```

rbind(NeuronCircTable_parietal,cbind(as.character(i),neuron_effect,neuron_SE,neuron_pval,"",oligo_eff
ect,oligo_SE,oligo_pval,"",micro_effect,micro_SE,micro_pval,"",circ_effect,circ_SE,circ_pval,"",bothneur
on_effect,bothneuron_SE,bothneuron_pval,"",botholigo_effect,botholigo_SE,botholigo_pval,"",bothmicr
o_effect,bothmicro_SE,bothmicro_pval,"",bothcirc_effect,bothcirc_SE,bothcirc_pval))

```

```

}

```

```

colnames(NeuronCircTable_parietal) <-
c("RNA","NeuronEstimate","NeuronSE","NeuronPvalue","", "OligoEstimate","OligoSE","OligoPvalue","", "
MicroEstimate","MicroSE","MicroPvalue","", "CircEstimate","CircSE","CircPvalue","", "BothNeuronEstima
te","BothNeuronSE","BothNeuronPvalue","", "BothOligoEstimate","BothOligoSE","BothOligoPvalue","", "
BothMicroEstimate","BothMicroSE","BothMicroPvalue","", "BothCircEstimate","BothCircSE","BothCircPv
alue")

##Change all factors to numeric
NeuronCircTable_parietal[] <- lapply(NeuronCircTable_parietal, function(x) as.numeric(as.character(x)))

##Recover RNA
NeuronCircTable_parietal$RNA <- gsub("circ","",as.character(sigList_parietal_CDR_top))

#FE metafor
library(metafor)
meta_results <- function(x,parietalEst,BM44Est,parietalSE,BM44SE) {
Estimate <- c(parietalEst[x],BM44Est[x])
SE <- c(parietalSE[x],BM44SE[x])
rma(yi=Estimate,sei=SE, method="FE")$pval
}

NeuronCircTable_meta <-
NeuronCircTable_parietal[,c("RNA","NeuronPvalue","OligoPvalue","MicroPvalue","CircPvalue","BothNe
uronPvalue","BothOligoPvalue","BothMicroPvalue","BothCircPvalue")]

NeuronCircTable_meta$NeuronPvalue <- as.numeric(unlist(mclapply(1:nrow(NeuronCircTable_parietal),
meta_results, mc.cores=5, parietalEst=NeuronCircTable_parietal$NeuronEstimate,
BM44Est=NeuronCircTable_BM44$NeuronEstimate,parietalSE=NeuronCircTable_parietal$NeuronSE,
BM44SE=NeuronCircTable_BM44$NeuronSE)))

NeuronCircTable_meta$OligoPvalue <- as.numeric(unlist(mclapply(1:nrow(NeuronCircTable_parietal),
meta_results, mc.cores=5, parietalEst=NeuronCircTable_parietal$OligoEstimate,
BM44Est=NeuronCircTable_BM44$OligoEstimate,parietalSE=NeuronCircTable_parietal$OligoSE,
BM44SE=NeuronCircTable_BM44$OligoSE)))

NeuronCircTable_meta$MicroPvalue <- as.numeric(unlist(mclapply(1:nrow(NeuronCircTable_parietal),
meta_results, mc.cores=5, parietalEst=NeuronCircTable_parietal$MicroEstimate,
BM44Est=NeuronCircTable_BM44$MicroEstimate,parietalSE=NeuronCircTable_parietal$MicroSE,
BM44SE=NeuronCircTable_BM44$MicroSE)))

NeuronCircTable_meta$CircPvalue <- as.numeric(unlist(mclapply(1:nrow(NeuronCircTable_parietal),
meta_results, mc.cores=5, parietalEst=NeuronCircTable_parietal$CircEstimate,

```

```
BM44Est=NeuronCircTable_BM44$CircEstimate,parietalSE=NeuronCircTable_parietal$CircSE,  
BM44SE=NeuronCircTable_BM44$CircSE)))
```

```
NeuronCircTable_meta$BothNeuronPvalue <-  
as.numeric(unlist(mclapply(1:nrow(NeuronCircTable_parietal), meta_results, mc.cores=5,  
parietalEst=NeuronCircTable_parietal$BothNeuronEstimate,  
BM44Est=NeuronCircTable_BM44$BothNeuronEstimate,parietalSE=NeuronCircTable_parietal$BothNeu  
ronSE, BM44SE=NeuronCircTable_BM44$BothNeuronSE)))
```

```
NeuronCircTable_meta$BothOligoPvalue <-  
as.numeric(unlist(mclapply(1:nrow(NeuronCircTable_parietal), meta_results, mc.cores=5,  
parietalEst=NeuronCircTable_parietal$BothOligoEstimate,  
BM44Est=NeuronCircTable_BM44$BothOligoEstimate,parietalSE=NeuronCircTable_parietal$BothOligoS  
E, BM44SE=NeuronCircTable_BM44$BothOligoSE)))
```

```
NeuronCircTable_meta$BothMicroPvalue <-  
as.numeric(unlist(mclapply(1:nrow(NeuronCircTable_parietal), meta_results, mc.cores=5,  
parietalEst=NeuronCircTable_parietal$BothMicroEstimate,  
BM44Est=NeuronCircTable_BM44$BothMicroEstimate,parietalSE=NeuronCircTable_parietal$BothMicro  
SE, BM44SE=NeuronCircTable_BM44$BothMicroSE)))
```

```
NeuronCircTable_meta$BothCircPvalue <-  
as.numeric(unlist(mclapply(1:nrow(NeuronCircTable_parietal), meta_results, mc.cores=5,  
parietalEst=NeuronCircTable_parietal$BothCircEstimate,  
BM44Est=NeuronCircTable_BM44$BothCircEstimate,parietalSE=NeuronCircTable_parietal$BothCircSE,  
BM44SE=NeuronCircTable_BM44$BothCircSE)))
```

## Differential Expression Meta-Analyses

```
#####  
## Dube et al., 2019 - circRNAs in AD ##  
#####
```

```
##Author: Umber Dube  
##Contact: udube@wustl.edu
```

```
##Code Section: Meta Analyses  
``{r}
```

```
#####  
#####  
## Meta-analysis ##  
#####  
#####
```

```

library(metaRNASeq)
library(qqman)
##Update Manhattan code by using trace ##

#trace("manhattan",edit=TRUE)

#labs = topHits$SNP, cex = 0.7, font = 3

ChrPosGene_CDR <- unique(circCoordinates_parietal[,c(1,2,3,4)])
ChrPosGene_CDR <- subset(ChrPosGene_CDR, Gene != "not_annotated")
ChrPosGene_CDR$AveragePos <- round(((ChrPosGene_CDR$Start + ChrPosGene_CDR$End)/2))

ChrPosGene_CDR <- ChrPosGene_CDR[order(ChrPosGene_CDR$Gene, -
abs(ChrPosGene_CDR$AveragePos) ), ] #sort by id and reverse of abs(value)
ChrPosGene_CDR <- ChrPosGene_CDR[ !duplicated(ChrPosGene_CDR$Gene), ] #keep the first
ChrPosGene_CDR$Gene <- paste0("circ",ChrPosGene_CDR$Gene)

ChrPosGene_PlaqueMean <- ChrPosGene_CDR
ChrPosGene_braak <- ChrPosGene_CDR
ChrPosGene_condition <- ChrPosGene_CDR

#####
##### Combined Code for Meta-analyses #####
#####

##Have to update the meta-analysis functions to deal with small pvalues

fishercomb <-
function(indpval,BHth = 0.05)
{
  listres = vector("list", 4)
  logpval=do.call(cbind,lapply(indpval, log))
  statc=apply(logpval,1, FUN=function(x) -2*sum(x,na.rm=TRUE))
  ## Added by Andrea for genes filtered in all samples
  ## (otherwise returns a value of 0)
  na.index <- which(apply(logpval, 1, function(x) sum(is.na(x))) == ncol(logpval))
  statc[na.index] <- NA

  notNA=apply(logpval,1,FUN=function(x) sum(!(is.na(x))))
  ## Update code for very small pvalues

```

```
## Based on: https://stats.stackexchange.com/questions/194133/why-is-the-probability-of-my-chi-square-statistic-equal-to-0
```

```
## Based on: https://stackoverflow.com/questions/40144267/calculating-miniscule-numbers-for-chi-squared-distribution-in-r-numerical-pre
```

```
rpvalc_gen <- function(x) {
  y <- statc[[x]]
  if (y >= 83) {
    pchisq(y,df=(2*notNA[[x]]),lower.tail=FALSE)
  } else {
    1 - pchisq(y, df=(2*notNA[[x]]))
  }
}

rpvalc <- unlist(lapply(1:length(statc), rpvalc_gen))

res = which(p.adjust(rpvalc, method = "BH") <= BHth)
listres[[1]] = res
listres[[2]] = statc
listres[[3]] = rpvalc
listres[[4]] = p.adjust(rpvalc, method = "BH")
names(listres) = c("DEindices", "TestStatistic", "rawpval", "adjpval")
return(listres)
}

invnorm <-
function(indpval, nrep, BHth = 0.05)
{
  listres = vector("list", 4)
  qnormpval= do.call(cbind,lapply(indpval, FUN=function(x) qnorm(1-x)))
  nrepcorr=t(apply(qnormpval,1,FUN=function(x){
  nrep2=nrep
  nrep2[which(is.na(x))]=0
  nrep2}))
  nreptot=apply(nrepcorr,1,sum)
  weight=sqrt(nrepcorr/nreptot)
  wqnormp=weight*qnormpval
  statc=apply(wqnormp,1, FUN=function(x) sum(x,na.rm=TRUE))
  ## Added by Andrea for genes filtered in all samples
  ## (otherwise returns a value of 0)
  nan.index <- which(apply(wqnormp, 1, function(x) sum(is.nan(x))) == ncol(wqnormp))
```

```

statc[nan.index] <- NA

## Update code for very small pvalues
## Based on: https://stackoverflow.com/questions/5932276/adding-floating-point-precision-to-qnorm-pnorm-in-r
rpvalc_gen <- function(x) {
  y <- statc[[x]]
  if (y >= 8) {
    rpvalc = pnorm(y, lower.tail = FALSE)
  } else {
    rpvalc = 1 - pnorm(y)
  }
}

rpvalc <- unlist(lapply(1:length(statc), rpvalc_gen))

res = which(p.adjust(rpvalc, method = "BH") <= BHth)
listres[[1]] = res
listres[[2]] = statc
listres[[3]] = rpvalc
listres[[4]] = p.adjust(rpvalc, method = "BH")
names(listres) = c("DEindices", "TestStatistic", "rawpval", "adjpval")
return(listres)
}

meta_analyses <- function () {

#####
#####
## CDR BM ##
#####

res_parietal_CDR_BM_trim <- as.data.frame(res_parietal_CDR_filter)[
intersect(rownames(as.data.frame(res_parietal_CDR_filter)),
rownames(as.data.frame(res_BM_CDR_filter))), ]
res_BM_CDR_trim <- as.data.frame(res_BM_CDR_filter)[
intersect(rownames(as.data.frame(res_parietal_CDR_filter)),
rownames(as.data.frame(res_BM_CDR_filter))), ]
rawpval_CDR <-
list("pval1"=res_parietal_CDR_BM_trim[["pvalue"]], "pval2"=res_BM_CDR_trim[["pvalue"]])

```



```

FC_CDR <<-
list("FC1"=res_parietal_CDR_BM_trim[["log2FoldChange"]], "FC2"=res_BM_CDR_trim[["log2FoldChange"
]])
adjpval_CDR <<-
list("adjpval1"=res_parietal_CDR_BM_trim[["padj"]], "adjpval2"=res_BM_CDR_trim[["padj"]])
DE_CDR <<- mapply(adjpval_CDR, FUN=function(x) ifelse(x <= 0.05, 1, 0))
fishcomb_CDR <<- fishercomb(rawpval_CDR, BHth = 0.05)
invnormcomb_CDR <<-
invnorm(rawpval_CDR, nrep=c(nrow(colData(dds_parietal_CDR_filter)), nrow(colData(dds_BM_CDR_filt
er))), BHth = 0.05)

invnormcomb_CDR$DEindices <<- NULL
fishcomb_CDR$DEindices <<- NULL

fish_CDR <<- as.data.frame(fishcomb_CDR)
inv_CDR <<- as.data.frame(invnormcomb_CDR)

both_CDR_BM <<- cbind(fish_CDR, inv_CDR)

colnames(both_CDR_BM) <<- c("f_testStat", "f_rawpval", "f_adjpval", "i_testStat", "i_rawpval",
"i_adjpval")
rownames(both_CDR_BM) <<- rownames(res_BM_CDR_trim)
both_CDR_BM <<- both_CDR_BM[,c(2,5,3,6)]

both_CDR_BM <<- cbind(both_CDR_BM, Chr = ChrPosGene_CDR[,
"Chr"][match(rownames(both_CDR_BM), ChrPosGene_CDR$Gene)])
both_CDR_BM <<- cbind(both_CDR_BM, AveragePos = ChrPosGene_CDR[,
"AveragePos"][match(rownames(both_CDR_BM), ChrPosGene_CDR$Gene)])
both_CDR_BM$Chr <<- gsub("chr", "", both_CDR_BM$Chr)
both_CDR_BM$Chr <<- gsub("X", "23", both_CDR_BM$Chr)
both_CDR_BM$Chr <<- gsub("Y", "24", both_CDR_BM$Chr)
both_CDR_BM$Chr <<- as.integer(both_CDR_BM$Chr)
both_CDR_BM <<- both_CDR_BM[!is.na(both_CDR_BM$Chr),]
both_CDR_BM$Gene <<- rownames(both_CDR_BM)

#manhattan(both_CDR_BM, chr="Chr", bp = "AveragePos", p="f_rawpval", snp = "Gene",
genomewideline = -log10(0.05/nrow(both_CDR_BM)), suggestiveline = FALSE, annotatePval =
0.05/nrow(both_CDR_BM), annotateTop = FALSE, main="circRNA DE CDR Gene Based Meta Mend BM,
Fisher PVal")

```

```
#manhattan(both_CDR_BM, chr="Chr", bp = "AveragePos", p="i_rawpval", snp = "Gene",
genomewideline = -log10(0.05/nrow(both_CDR_BM)), suggestiveline = FALSE, annotatePval =
0.05/nrow(both_CDR_BM), annotateTop = FALSE, main="circRNA DE CDR Gene Based Meta Mend BM,
Stouffer PVal")
```

```
#####
```

```
#####
```

```
## Braak BM ##
```

```
#####
```

```
res_parietal_braak_BM_trim <- as.data.frame(res_parietal_braak_filter[
intersect(rownames(as.data.frame(res_parietal_braak_filter)),
rownames(as.data.frame(res_BM_braak_filter))), ])
res_BM_braak_trim <- as.data.frame(res_BM_braak_filter[
intersect(rownames(as.data.frame(res_parietal_braak_filter)),
rownames(as.data.frame(res_BM_braak_filter))), ])
rawpval_braak <-
list("pval1"=res_parietal_braak_BM_trim[["pvalue"]], "pval2"=res_BM_braak_trim[["pvalue"]])
FC_braak <-
list("FC1"=res_parietal_braak_BM_trim[["log2FoldChange"]], "FC2"=res_BM_braak_trim[["log2FoldChan
ge"]])
adjpval_braak <-
list("adjpval1"=res_parietal_braak_BM_trim[["padj"]], "adjpval2"=res_BM_braak_trim[["padj"]])
DE_braak <- mapply(adjpval_braak, FUN=function(x) ifelse(x <= 0.05, 1, 0))
fishcomb_braak <- fishercomb(rawpval_braak, BHth = 0.05)
invnormcomb_braak <-
invnorm(rawpval_braak, nrep=c(nrow(colData(dds_parietal_braak_filter)), nrow(colData(dds_BM_braak_
filter))), BHth = 0.05)
```

```
invnormcomb_braak$DEindices <- NULL
```

```
fishcomb_braak$DEindices <- NULL
```

```
fish_braak <- as.data.frame(fishcomb_braak)
```

```
inv_braak <- as.data.frame(invnormcomb_braak)
```

```
both_braak_BM <- cbind(fish_braak, inv_braak)
```

```
colnames(both_braak_BM) <- c("f_testStat", "f_rawpval", "f_adjpval", "i_testStat", "i_rawpval",
"i_adjpval")
```

```

rownames(both_braak_BM) <<- rownames(res_BM_braak_trim)
both_braak_BM <<- both_braak_BM[,c(2,5,3,6)]

both_braak_BM <<- cbind(both_braak_BM, Chr = ChrPosGene_braak[,
"Chr"][match(rownames(both_braak_BM), ChrPosGene_braak$Gene)])
both_braak_BM <<- cbind(both_braak_BM, AveragePos = ChrPosGene_braak[,
"AveragePos"][match(rownames(both_braak_BM), ChrPosGene_braak$Gene)])
both_braak_BM$Chr <<- gsub("chr", "", both_braak_BM$Chr)
both_braak_BM$Chr <<- gsub("X", "23", both_braak_BM$Chr)
both_braak_BM$Chr <<- gsub("Y", "24", both_braak_BM$Chr)
both_braak_BM$Chr <<- as.integer(both_braak_BM$Chr)
both_braak_BM <<- both_braak_BM[!is.na(both_braak_BM$Chr),]
both_braak_BM$Gene <<- rownames(both_braak_BM)

#manhattan(both_braak_BM, chr="Chr", bp = "AveragePos", p="f_rawpval", snp = "Gene",
genomewideline = -log10(0.05/nrow(both_braak_BM)), suggestiveline = FALSE, annotatePval =
0.05/nrow(both_braak_BM), annotateTop = FALSE, main="circRNA DE braak Gene Based Meta Mend
BM, Fisher PVal")

#manhattan(both_braak_BM, chr="Chr", bp = "AveragePos", p="i_rawpval", snp = "Gene",
genomewideline = -log10(0.05/nrow(both_braak_BM)), suggestiveline = FALSE, annotatePval =
0.05/nrow(both_braak_BM), annotateTop = FALSE, main="circRNA DE braak Gene Based Meta Mend
BM, Stouffer PVal")

#####
#####
## condition BM ##
#####

res_parietal_condition_BM_trim <<- as.data.frame(res_parietal_condition_filter[
intersect(rownames(as.data.frame(res_parietal_condition_filter)),
rownames(as.data.frame(res_BM_condition_filter))), ])
res_BM_condition_trim <<- as.data.frame(res_BM_condition_filter[
intersect(rownames(as.data.frame(res_parietal_condition_filter)),
rownames(as.data.frame(res_BM_condition_filter))), ])
rawpval_condition <<-
list("pval1"=res_parietal_condition_BM_trim[["pvalue"]], "pval2"=res_BM_condition_trim[["pvalue"]])
FC_condition <<-
list("FC1"=res_parietal_condition_BM_trim[["log2FoldChange"]], "FC2"=res_BM_condition_trim[["log2F
oldChange"]])

```

```

adjpval_condition <<-
list("adjpval1"=res_parietal_condition_BM_trim[["padj"]], "adjpval2"=res_BM_condition_trim[["padj"]])
DE_condition <<- mapply(adjpval_condition, FUN=function(x) ifelse(x <= 0.05, 1, 0))
fishcomb_condition <<- fishercomb(rawpval_condition, BHth = 0.05)
invnormcomb_condition <<-
invnorm(rawpval_condition, nrep=c(nrow(colData(dds_parietal_condition_filter)), nrow(colData(dds_BM
_condition_filter))), BHth = 0.05)

invnormcomb_condition$DEindices <<- NULL
fishcomb_condition$DEindices <<- NULL

fish_condition <<- as.data.frame(fishcomb_condition)
inv_condition <<- as.data.frame(invnormcomb_condition)

both_condition_BM <<- cbind(fish_condition, inv_condition)

colnames(both_condition_BM) <<- c("f_testStat", "f_rawpval", "f_adjpval", "i_testStat", "i_rawpval",
"i_adjpval")
rownames(both_condition_BM) <<- rownames(res_BM_condition_trim)
both_condition_BM <<- both_condition_BM[,c(2,5,3,6)]

both_condition_BM <<- cbind(both_condition_BM, Chr = ChrPosGene_condition[,
"Chr"][match(rownames(both_condition_BM), ChrPosGene_condition$Gene)])
both_condition_BM <<- cbind(both_condition_BM, AveragePos = ChrPosGene_condition[,
"AveragePos"][match(rownames(both_condition_BM), ChrPosGene_condition$Gene)])
both_condition_BM$Chr <<- gsub("chr", "", both_condition_BM$Chr)
both_condition_BM$Chr <<- gsub("X", "23", both_condition_BM$Chr)
both_condition_BM$Chr <<- gsub("Y", "24", both_condition_BM$Chr)
both_condition_BM$Chr <<- as.integer(both_condition_BM$Chr)
both_condition_BM <<- both_condition_BM[!is.na(both_condition_BM$Chr),]
both_condition_BM$Gene <<- rownames(both_condition_BM)

#manhattan(both_condition_BM, chr="Chr", bp = "AveragePos", p="f_rawpval", snp = "Gene",
genomewideline = -log10(0.05/nrow(both_condition_BM)), suggestiveline = FALSE, annotatePval =
0.05/nrow(both_condition_BM), annotateTop = FALSE, main="circRNA DE condition Gene Based Meta
Mend BM, Fisher PVal")

#manhattan(both_condition_BM, chr="Chr", bp = "AveragePos", p="i_rawpval", snp = "Gene",
genomewideline = -log10(0.05/nrow(both_condition_BM)), suggestiveline = FALSE, annotatePval =
0.05/nrow(both_condition_BM), annotateTop = FALSE, main="circRNA DE condition Gene Based Meta
Mend BM, Stouffer PVal")

```

```
}
```

```
##BM10
```

```
meta_analyses_BM10 <- gsub("BM", "BM10", as.list(body(meta_analyses)))  
#Replace first line to create function  
meta_analyses_BM10[1] <- "meta_analyses_BM10 <- function() {"  
#Add last line to end function  
meta_analyses_BM10[length(meta_analyses_BM10)+1] <- "}"  
write(meta_analyses_BM10, "/home/dubeu/Synapse/meta_analyses_BM10.R")
```

```
##BM22
```

```
meta_analyses_BM22 <- gsub("BM", "BM22", as.list(body(meta_analyses)))  
#Replace first line to create function  
meta_analyses_BM22[1] <- "meta_analyses_BM22 <- function() {"  
#Add last line to end function  
meta_analyses_BM22[length(meta_analyses_BM22)+1] <- "}"  
write(meta_analyses_BM22, "/home/dubeu/Synapse/meta_analyses_BM22.R")
```

```
##BM36
```

```
meta_analyses_BM36 <- gsub("BM", "BM36", as.list(body(meta_analyses)))  
#Replace first line to create function  
meta_analyses_BM36[1] <- "meta_analyses_BM36 <- function() {"  
#Add last line to end function  
meta_analyses_BM36[length(meta_analyses_BM36)+1] <- "}"  
write(meta_analyses_BM36, "/home/dubeu/Synapse/meta_analyses_BM36.R")
```

```
##BM44
```

```
meta_analyses_BM44 <- gsub("BM", "BM44", as.list(body(meta_analyses)))  
#Replace first line to create function  
meta_analyses_BM44[1] <- "meta_analyses_BM44 <- function() {"  
#Add last line to end function  
meta_analyses_BM44[length(meta_analyses_BM44)+1] <- "}"  
write(meta_analyses_BM44, "/home/dubeu/Synapse/meta_analyses_BM44.R")
```

```
source('/home/dubeu/Synapse/meta_analyses_BM10.R')  
source('/home/dubeu/Synapse/meta_analyses_BM22.R')  
source('/home/dubeu/Synapse/meta_analyses_BM36.R')  
source('/home/dubeu/Synapse/meta_analyses_BM44.R')
```

```
meta_analyses_BM10()
meta_analyses_BM22()
meta_analyses_BM36()
meta_analyses_BM44()
``
```

## Pre-symptomatic Bootstrap Correlation Distribution Analyses

```
#####
## Dube et al., 2019 - circRNAs in AD ##
#####
```

```
##Author: Umber Dube
##Contact: udube@wustl.edu
```

```
##Code Section: PreSymptomatic Analyses
``{r}
```

```
#####
#####
### Presymptomatic Correlation Based Analysis ###
#####
#####
```

```
presymp_analyses <- function () {
```

```
#####
##DE based on BM No PreSymp vs. HCs ##
#####
```

```
##DE based on conditionNoPre ##
```

```
dds_BM_conditionNoPre_filter <- dds_BM_condition_filter
```

```
#Remove PreSymptomatic
dds_BM_conditionNoPre_filter <- dds_BM_conditionNoPre_filter[,
!(dds_BM_conditionNoPre_filter$PreSymptomatic == 1)]
```

```
dds_BM_conditionNoPre_filter$NP.1 <- droplevels(dds_BM_conditionNoPre_filter$NP.1)
```

```
dds_BM_conditionNoPre_filter$batch <- droplevels(dds_BM_conditionNoPre_filter$batch)
```

```
levels(dds_BM_conditionNoPre_filter$NP.1) <- list(HC=c("1"), AD=c("2", "3", "4"))
```

```
design(dds_BM_conditionNoPre_filter) = formula( ~ PMI + TIN.median. + AOD + batch + SEX + PC1 + PC2 + NP.1)
```

```
dds_BM_final_conditionNoPre_filter <<- DESeq(dds_BM_conditionNoPre_filter, parallel = TRUE, betaPrior = FALSE)
```

```
res_BM_conditionNoPre_filter <<- results(dds_BM_final_conditionNoPre_filter, contrast=c("NP.1", "AD", "HC"), alpha = 0.05)  
summary(res_BM_conditionNoPre_filter)
```

```
#res_BM_conditionNoPre_filter <<- results(dds_BM_final_conditionNoPre_filter, contrast=c("NP.1", "2", "1"), alpha = 0.05)  
#summary(res_BM_conditionNoPre_filter)
```

```
#####  
##DE based on BM PreSymp vs. HCs ##  
#####
```

```
dds_BM_PreSymp_filter <<- dds_BM_condition_filter
```

```
dds_BM_PreSymp_filter <<- dds_BM_PreSymp_filter[, !is.na(dds_BM_PreSymp_filter$batch)]
```

```
dds_BM_PreSymp_filter <<- dds_BM_PreSymp_filter[, !is.na(dds_BM_PreSymp_filter$PC1)]  
dds_BM_PreSymp_filter <<- dds_BM_PreSymp_filter[, !is.na(dds_BM_PreSymp_filter$PC2)]
```

```
#Only CDR 0.5 or less
```

```
dds_BM_PreSymp_filter <<- dds_BM_PreSymp_filter[, !is.na(dds_BM_PreSymp_filter$CDR)]  
dds_BM_PreSymp_filter <<- dds_BM_PreSymp_filter[, !(dds_BM_PreSymp_filter$CDR >= 1) ]
```

```
#Only braak 2 or less
```

```
#dds_BM_PreSymp_filter <<- dds_BM_PreSymp_filter[, !is.na(dds_BM_PreSymp_filter$bbscore)]  
#dds_BM_PreSymp_filter <<- dds_BM_PreSymp_filter[, !(dds_BM_PreSymp_filter$PreSymptomatic == 1 & dds_BM_PreSymp_filter$bbscore <= 2) ]
```

```
dds_BM_PreSymp_filter$batch <<- droplevels(dds_BM_PreSymp_filter$batch)  
dds_BM_PreSymp_filter$NP.1 <<- droplevels(dds_BM_PreSymp_filter$NP.1)
```

```
levels(dds_BM_PreSymp_filter$NP.1) <<- list(HC=c("1"), AD=c("2", "3", "4"))
```

```

design(dds_BM_PreSymp_filter) = formula( ~ PMI + TIN.median. + AOD + batch + SEX + PC1 + PC2 +
NP.1)

dds_BM_final_PreSymp_filter <<- DESeq(dds_BM_PreSymp_filter, parallel = TRUE, betaPrior = FALSE)

res_BM_PreSymp_filter <<- results(dds_BM_final_PreSymp_filter, contrast=c("NP.1", "AD", "HC"), alpha
= 0.05)
#res_BM_PreSymp_filter <<- results(dds_BM_final_PreSymp_filter, contrast=c("NP.1", "2", "1"), alpha =
0.05)
summary(res_BM_PreSymp_filter)

#https://stats.idre.ucla.edu/r/faq/how-can-i-generate-bootstrap-statistics-in-r/
#https://stats.stackexchange.com/questions/246211/bootstrap-to-test-differences-between-
correlation-coefficients

sigList_BM_condition <<- rownames(subset(res_BM_conditionNoPre_filter, padj < 0.05))

Presymptomatic_BM_sig <<- merge(as.data.frame(res_BM_PreSymp_filter[sigList_BM_condition,]),
as.data.frame(res_BM_conditionNoPre_filter), by='row.names')

Presymptomatic_BM_notsig <<- merge(as.data.frame(res_BM_PreSymp_filter),
as.data.frame(res_BM_conditionNoPre_filter), by='row.names')
rownames(Presymptomatic_BM_notsig) <<- Presymptomatic_BM_notsig$Row.names
Presymptomatic_BM_notsig <<- Presymptomatic_BM_notsig[!(
rownames(Presymptomatic_BM_notsig) %in% sigList_BM_condition),]
Presymptomatic_BM_notsig <<- na.omit(Presymptomatic_BM_notsig)

fc <<- function(d, i){
  d2 <<- d[i,]
  return(cor(d2$log2FoldChange.x, d2$log2FoldChange.y, use = "complete.obs"))
}

bootcorr_presymptom_BM_sig <<- boot(Presymptomatic_BM_sig, fc, R=10000)

bootcorr_presymptom_BM_notsig <<- boot(Presymptomatic_BM_notsig, fc, R=10000)

bootcorr_presymptom_BM_sig_CI <<- boot.ci(boot.out = bootcorr_presymptom_BM_sig, type = "all")

bootcorr_presymptom_BM_notsig_CI <<- boot.ci(boot.out = bootcorr_presymptom_BM_notsig, type =
"all")

```



```
}
```

```
##BM10
```

```
presymp_analyses_BM10 <- gsub("BM","BM10",as.list(body(presymp_analyses)))  
#Replace first line to create function  
presymp_analyses_BM10[1] <- "presymp_analyses_BM10 <- function() {"  
#Replace first line to end function  
presymp_analyses_BM10[length(presymp_analyses_BM10)+1] <- "}"  
write(presymp_analyses_BM10, "/home/dubeu/Synapse/presymp_analyses_BM10.R")
```

```
##BM22
```

```
presymp_analyses_BM22 <- gsub("BM","BM22",as.list(body(presymp_analyses)))  
#Replace first line to create function  
presymp_analyses_BM22[1] <- "presymp_analyses_BM22 <- function() {"  
#Replace first line to end function  
presymp_analyses_BM22[length(presymp_analyses_BM22)+1] <- "}"  
write(presymp_analyses_BM22, "/home/dubeu/Synapse/presymp_analyses_BM22.R")
```

```
##BM36
```

```
presymp_analyses_BM36 <- gsub("BM","BM36",as.list(body(presymp_analyses)))  
#Replace first line to create function  
presymp_analyses_BM36[1] <- "presymp_analyses_BM36 <- function() {"  
#Replace first line to end function  
presymp_analyses_BM36[length(presymp_analyses_BM36)+1] <- "}"  
write(presymp_analyses_BM36, "/home/dubeu/Synapse/presymp_analyses_BM36.R")
```

```
##BM44
```

```
presymp_analyses_BM44 <- gsub("BM","BM44",as.list(body(presymp_analyses)))  
#Replace first line to create function  
presymp_analyses_BM44[1] <- "presymp_analyses_BM44 <- function() {"  
#Replace first line to end function  
presymp_analyses_BM44[length(presymp_analyses_BM44)+1] <- "}"  
write(presymp_analyses_BM44, "/home/dubeu/Synapse/presymp_analyses_BM44.R")
```

```
source('/home/dubeu/Synapse/presymp_analyses_BM10.R')  
source('/home/dubeu/Synapse/presymp_analyses_BM22.R')  
source('/home/dubeu/Synapse/presymp_analyses_BM36.R')  
source('/home/dubeu/Synapse/presymp_analyses_BM44.R')
```

```
presymp_analyses_BM10()
presymp_analyses_BM22()
presymp_analyses_BM36()
presymp_analyses_BM44()
```

```
##DE based on conditionNoPre ##
```

```
#####
```

```
## Filtering QC ##
```

```
## via: https://support.bioconductor.org/p/65256/ ##
```

```
## triplicate by lowest number: https://support.bioconductor.org/p/49710/ ##
```

```
#####
```

```
dds_parietal_conditionNoPre_filter <- dds_parietal_condition_filter
```

```
#Remove PreSymptomatic
```

```
dds_parietal_conditionNoPre_filter <- dds_parietal_conditionNoPre_filter[,
!(dds_parietal_conditionNoPre_filter$PreSymptomatic == 1) ]
```

```
#Variable under investigation is at the end of the design formula
```

```
design(dds_parietal_conditionNoPre_filter) = formula( ~ PMI + TIN.median. + AGE_at_death + pool +
GENDER + PC1 + PC2 + condition)
```

```
#Run the actual DESeq2 function
```

```
dds_parietal_final_conditionNoPre_filter <- DESeq(dds_parietal_conditionNoPre_filter, parallel = TRUE,
betaPrior = FALSE)
```

```
##Analyze results based on contrast
```

```
res_parietal_conditionNoPre_filter <- results(dds_parietal_final_conditionNoPre_filter,
contrast=c("condition", "LOAD", "CO"), alpha = 0.05)
summary(res_parietal_conditionNoPre_filter)
```

```
#####
```

```
##DE based on parietal PreSymp vs. HCs ##
```

```
#####
```

```
dds_parietal_PreSymp_filter <- dds_parietal_condition_filter
```

```
#Only CDR 0.5 or less
```

```
dds_parietal_PreSymp_filter <- dds_parietal_PreSymp_filter[  
,!is.na(dds_parietal_PreSymp_filter$CDR_e)]  
dds_parietal_PreSymp_filter <- dds_parietal_PreSymp_filter[, !(dds_parietal_PreSymp_filter$CDR_e >=  
1) ]
```

```
#Only braak 2 or less
```

```
#dds_parietal_PreSymp_filter <- dds_parietal_PreSymp_filter[  
,!is.na(dds_parietal_PreSymp_filter$braak_final)]  
#dds_parietal_PreSymp_filter <- dds_parietal_PreSymp_filter[,  
!(dds_parietal_PreSymp_filter$PreSymptomatic == 1 & dds_parietal_PreSymp_filter$braak_final <= 2) ]
```

```
dds_parietal_PreSymp_filter <- dds_parietal_PreSymp_filter[  
,!is.na(dds_parietal_PreSymp_filter$AGE_at_death)]
```

```
dds_parietal_PreSymp_filter <- dds_parietal_PreSymp_filter[ ,!is.na(dds_parietal_PreSymp_filter$PMI)]
```

```
dds_parietal_PreSymp_filter <- dds_parietal_PreSymp_filter[ ,!is.na(dds_parietal_PreSymp_filter$PC1)]  
dds_parietal_PreSymp_filter <- dds_parietal_PreSymp_filter[ ,!is.na(dds_parietal_PreSymp_filter$PC2)]  
dds_parietal_PreSymp_filter$condition <- droplevels(dds_parietal_PreSymp_filter$condition)
```

```
design(dds_parietal_PreSymp_filter) = formula( ~ PMI + TIN.median. + AGE_at_death + pool + GENDER +  
PC1 + PC2 + condition)
```

```
dds_parietal_final_PreSymp_filter <- DESeq(dds_parietal_PreSymp_filter, parallel = TRUE, betaPrior =  
FALSE)
```

```
##Analyze results based on contrast
```

```
res_parietal_PreSymp_filter <- results(dds_parietal_final_PreSymp_filter, contrast=c("condition",  
"LOAD", "CO"), alpha = 0.05)  
summary(res_parietal_PreSymp_filter)
```

```
#https://stats.idre.ucla.edu/r/faq/how-can-i-generate-bootstrap-statistics-in-r/  
#https://stats.stackexchange.com/questions/246211/bootstrap-to-test-differences-between-correlation-coefficients
```

```
sigList_parietal_condition <- rownames(subset(res_parietal_conditionNoPre_filter, padj < 0.05))
```

```

Presymptomatic_parietal_sig <-
merge(as.data.frame(res_parietal_PreSypm_filter[sigList_parietal_condition,]),
as.data.frame(res_parietal_conditionNoPre_filter), by='row.names')

Presymptomatic_parietal_notsig <- merge(as.data.frame(res_parietal_PreSypm_filter),
as.data.frame(res_parietal_conditionNoPre_filter), by='row.names')
rownames(Presymptomatic_parietal_notsig) <- Presymptomatic_parietal_notsig$Row.names
Presymptomatic_parietal_notsig <- Presymptomatic_parietal_notsig[!(
rownames(Presymptomatic_parietal_notsig) %in% sigList_parietal_condition),]
Presymptomatic_parietal_notsig <- na.omit(Presymptomatic_parietal_notsig)

fc <- function(d, i){
  d2 <- d[i,]
  return(cor(d2$log2FoldChange.x, d2$log2FoldChange.y, use = "complete.obs"))
}

bootcorr_presymptom_parietal_sig <- boot(Presymptomatic_parietal_sig, fc, R=10000)

bootcorr_presymptom_parietal_notsig <- boot(Presymptomatic_parietal_notsig, fc, R=10000)

bootcorr_presymptom_parietal_sig_CI <- boot.ci(boot.out = bootcorr_presymptom_parietal_sig, type =
"all")

bootcorr_presymptom_parietal_notsig_CI <- boot.ci(boot.out = bootcorr_presymptom_parietal_notsig,
type = "all")

#####
#####
## PreSypm Same Direction between the studies ##
#####
#####

###BM44

##Is the Presymp Log2FC in the same direction as the full analysis Log2FC

sign_BM44_condition_top <- sign(as.data.frame(subset(res_BM44_conditionNoPre_filter, padj <
0.05))$log2FoldChange)

```

```
sign_BM44_PreSymp_top <-  
sign(as.data.frame(res_BM44_PreSymp_filter[rownames(as.data.frame(subset(res_BM44_conditionNoPre_filter, padj < 0.05))),])$log2FoldChange)
```

```
sign_BM44_consistent_conditionPresymp <-  
rownames(as.data.frame(subset(res_BM44_conditionNoPre_filter, padj < 0.05)))[sign_BM44_condition_top == sign_BM44_PreSymp_top]
```

```
sign_parietal_condition_top <- sign(as.data.frame(subset(res_parietal_conditionNoPre_filter, pvalue < 0.05))$log2FoldChange)
```

```
sign_parietal_PreSymp_top <-  
sign(as.data.frame(res_parietal_PreSymp_filter[rownames(as.data.frame(subset(res_parietal_conditionNoPre_filter, pvalue < 0.05))),])$log2FoldChange)
```

```
sign_parietal_consistent_conditionPresymp <-  
rownames(as.data.frame(subset(res_parietal_conditionNoPre_filter, pvalue < 0.05)))[sign_parietal_condition_top == sign_parietal_PreSymp_top]
```

```
intersect(sign_parietal_consistent_conditionPresymp, sign_BM44_consistent_conditionPresymp)
```

```
res_BM44_PreSymp_filter[intersect(sign_parietal_consistent_conditionPresymp,  
sign_BM44_consistent_conditionPresymp),]
```

```
res_parietal_PreSymp_filter[intersect(sign_parietal_consistent_conditionPresymp,  
sign_BM44_consistent_conditionPresymp),]
```

```
###BM36
```

```
##Is the Presymp Log2FC in the same direction as the full analysis Log2FC
```

```
sign_BM36_condition_top <- sign(as.data.frame(subset(res_BM36_conditionNoPre_filter, padj < 0.05))$log2FoldChange)
```

```
sign_BM36_PreSymp_top <-  
sign(as.data.frame(res_BM36_PreSymp_filter[rownames(as.data.frame(subset(res_BM36_conditionNoPre_filter, padj < 0.05))),])$log2FoldChange)
```

```

sign_BM36_consistent_conditionPresymp <-
rownames(as.data.frame(subset(res_BM36_conditionNoPre_filter, padj <
0.05)))[sign_BM36_condition_top == sign_BM36_PreSymp_top]

sign_parietal_condition_top <- sign(as.data.frame(subset(res_parietal_conditionNoPre_filter, pvalue <
0.05))$log2FoldChange)

sign_parietal_PreSymp_top <-
sign(as.data.frame(res_parietal_PreSymp_filter[rownames(as.data.frame(subset(res_parietal_condition
NoPre_filter, pvalue < 0.05))),])$log2FoldChange)

sign_parietal_consistent_conditionPresymp <-
rownames(as.data.frame(subset(res_parietal_conditionNoPre_filter, pvalue <
0.05)))[sign_parietal_condition_top == sign_parietal_PreSymp_top]

intersect(sign_parietal_consistent_conditionPresymp, sign_BM36_consistent_conditionPresymp)

res_BM36_PreSymp_filter[intersect(sign_parietal_consistent_conditionPresymp,
sign_BM36_consistent_conditionPresymp),]

```

```

#####
#####
## PreSymp Numbers for the Paper ##
#####
#####

```

```

nrow(subset(Presymptomatic_BM44_sig, pvalue.x < 0.05))
nrow(Presymptomatic_BM44_sig)

sign(subset(Presymptomatic_BM44_sig, pvalue.x <
0.05)$log2FoldChange.x)==sign(subset(Presymptomatic_BM44_sig, pvalue.x < 0.05)$log2FoldChange.y)

```

...

### Proportion of Variation Explained Analyses

```

#####
## Dube et al., 2019 - circRNAs in AD ##
#####

```

##Author: Umber Dube

```
##Contact: udube@wustl.edu
```

```
##Code Section: Proportion of Variance Explained Analyses
```

```
``{r}
```

```
#####  
#####  
## Proportion of Variance Explained AMP_AD ##  
#####  
#####
```

```
PropVar_analyses <- function() {
```

```
##Estimated proportion of variance for CDR
```

```
PropVar_BM_CDR_Neuron_anova <- data.frame()  
PropVar_BM_CDR_Neuron_relimpo <- data.frame()  
Gene_archive_BM_CDR <- data.frame(row.names = rownames(t(norm_BM_CDR_counts_regress)))  
# this will get the intersection of the row.names for everything in the list  
sigList_BM_CDR = subset(as.data.frame(both_CDR_BM), i_adjpv < 0.05)  
sigList_BM_CDR = sigList_BM_CDR[order(sigList_BM_CDR$i_adjpv),]  
sigList_BM_CDR = rownames(sigList_BM_CDR)  
sigList_BM_CDR_top <- head(sigList_BM_CDR, n = 10)
```

```
for (i in sigList_BM_CDR_top) {
```

```
  print(i)
```

```
  print(match(i,sigList_BM_CDR_top)/length(sigList_BM_CDR_top))
```

```
  Gene_BM_CDR <- t(norm_BM_CDR_counts_regress[i,])  
  regress_BM_CDR <- cbind(coldata_BM[rownames(Gene_BM_CDR),], Gene =  
t(norm_BM_CDR_counts_regress[i,]))
```

```
  #regress_BM_CDR$RACE <- relevel(regress_BM_CDR$RACE, "W")
```

```
  Gene_archive_BM_CDR <- cbind(Gene_archive_BM_CDR,  
as.data.frame(t(norm_BM_CDR_counts_regress[i,])))
```

```
  model_regress_BM_CDR = lm(CDR ~ ApoE4_SNP + Neuron + regress_BM_CDR[,i],  
data=regress_BM_CDR )
```

```

coefs <- data.frame(coef(summary(model_regress_BM_CDR)))

af <- anova(model_regress_BM_CDR)
afss <- af$"Sum Sq"
anova_BM <- data.frame()
anova_BM <- (cbind(af,PctExp=afss/sum(afss)*100))
anova_BM <- anova_BM[(nrow(anova_BM)-1),ncol(anova_BM)]
coefs <- cbind(coefs, PropVar = anova_BM)

PropVar_BM_CDR_Neuron_anova <- bind_rows(PropVar_BM_CDR_Neuron_anova, i =
coefs[(nrow(coefs)-1),])
PropVar_BM_CDR_Neuron_relimpo <- bind_rows(PropVar_BM_CDR_Neuron_relimpo,
relaimpo = ((calc.relimp(model_regress_BM_CDR, type = c("lmg"), rela = FALSE))$lmg[3])*100
}

rownames(PropVar_BM_CDR_Neuron_anova) <- sigList_BM_CDR_top
rownames(PropVar_BM_CDR_Neuron_relimpo) <- sigList_BM_CDR_top

regress_BM_CDR_Final <- cbind(coldata_BM[rownames(Gene_BM_CDR),], Gene_archive_BM_CDR)

formula_BM_CDR = paste("CDR ~ ApoE4_SNP + Neuron +", paste(paste0("", sigList_BM_CDR_top, ""),
collapse = " + "))

fullmodel_BM_CDR <- lm(formula_BM_CDR, data = regress_BM_CDR_Final)

af <- anova(fullmodel_BM_CDR)
afss <- af$"Sum Sq"
PropVar_fullmodel_BM_CDR_Neuron_anova <- (cbind(af,PctExp=afss/sum(afss)*100))
PropVar_fullmodel_BM_CDR_Neuron_relimpo <- as.data.frame(calc.relimp(fullmodel_BM_CDR, type
= c("lmg"), rela = FALSE)$lmg)
colnames(PropVar_fullmodel_BM_CDR_Neuron_relimpo) <- "relaimpo_lmg"
PropVar_fullmodel_BM_CDR_Neuron_relimpo$relaimpo_lmg <-
PropVar_fullmodel_BM_CDR_Neuron_relimpo$relaimpo_lmg*100

##Estimated proportion of variance for braak

PropVar_BM_braak_Neuron_anova <- data.frame()
PropVar_BM_braak_Neuron_relimpo <- data.frame()
Gene_archive_BM_braak <- data.frame(row.names = rownames(t(norm_BM_braak_counts_regress)))

```



```

# this will get the intersection of the row.names for everything in the list
sigList_BM_braak = subset(as.data.frame(both_braak_BM), i_adjpv < 0.05)
sigList_BM_braak = sigList_BM_braak[order(sigList_BM_braak$i_adjpv),]
sigList_BM_braak = rownames(sigList_BM_braak)
sigList_BM_braak_top <- head(sigList_BM_braak, n = 10)

for (i in sigList_BM_braak_top) {

  print(i)

  print(match(i,sigList_BM_braak_top)/length(sigList_BM_braak_top))

  Gene_BM_braak <- t(norm_BM_braak_counts_regress[i,])
  regress_BM_braak <- cbind(coldata_BM[rownames(Gene_BM_braak),], Gene =
t(norm_BM_braak_counts_regress[i,]))

  #regress_BM_braak$RACE <- relevel(regress_BM_braak$RACE, "W")

  Gene_archive_BM_braak <- cbind(Gene_archive_BM_braak,
as.data.frame(t(norm_BM_braak_counts_regress[i,])))

  model_regress_BM_braak = lm(bbscore ~ ApoE4_SNP + Neuron + regress_BM_braak[i],
data=regress_BM_braak )

  coefs <- data.frame(coef(summary(model_regress_BM_braak)))

  af <- anova(model_regress_BM_braak)
  afss <- af$"Sum Sq"
  anova_BM <- data.frame()
  anova_BM <- (cbind(af,PctExp=afss/sum(afss)*100))
  anova_BM <- anova_BM[(nrow(anova_BM)-1),ncol(anova_BM)]
  coefs <- cbind(coefs, PropVar = anova_BM)

  PropVar_BM_braak_Neuron_anova <- bind_rows(PropVar_BM_braak_Neuron_anova, i =
coefs[(nrow(coefs)-1),])
  PropVar_BM_braak_Neuron_relimpo <- bind_rows(PropVar_BM_braak_Neuron_relimpo,
relaimpo = ((calc.relimp(model_regress_BM_braak, type = c("lmg"), rela = FALSE))$lmg[3])*100)
}

rownames(PropVar_BM_braak_Neuron_anova) <- sigList_BM_braak_top

```

```

rownames(PropVar_BM_braak_Neuron_relimpo) <<- sigList_BM_braak_top

regress_BM_braak_Final <<- cbind(coldata_BM[rownames(Gene_BM_braak)],
Gene_archive_BM_braak)

formula_BM_braak = paste("bbscore ~ ApoE4_SNP + Neuron +", paste(paste0("'", sigList_BM_braak_top,
'''), collapse = " + "))

fullmodel_BM_braak <<- lm(formula_BM_braak, data = regress_BM_braak_Final)

af <<- anova(fullmodel_BM_braak)
afss <<- af$"Sum Sq"
PropVar_fullmodel_BM_braak_Neuron_anova <<- (cbind(af,PctExp=afss/sum(afss)*100))
PropVar_fullmodel_BM_braak_Neuron_relimpo <<- as.data.frame(calc.relimp(fullmodel_BM_braak,
type = c("lmg"), rela = FALSE)$lmg)
colnames(PropVar_fullmodel_BM_braak_Neuron_relimpo) <<- "relaimpo_lmg"
PropVar_fullmodel_BM_braak_Neuron_relimpo$relaimpo_lmg <<-
PropVar_fullmodel_BM_braak_Neuron_relimpo$relaimpo_lmg*100

##Estimated proportion of variance for PlaqueMean

PropVar_BM_PlaqueMean_Neuron_anova <<- data.frame()
PropVar_BM_PlaqueMean_Neuron_relimpo <<- data.frame()
Gene_archive_BM_PlaqueMean <<- data.frame(row.names =
rownames(t(norm_BM_PlaqueMean_counts_regress)))
# this will get the intersection of the row.names for everything in the list
sigList_BM_PlaqueMean = subset(as.data.frame(res_BM_PlaqueMean_filter), padj < 0.05)
sigList_BM_PlaqueMean = sigList_BM_PlaqueMean[order(sigList_BM_PlaqueMean$padj),]
sigList_BM_PlaqueMean = rownames(sigList_BM_PlaqueMean)
sigList_BM_PlaqueMean_top <<- head(sigList_BM_PlaqueMean, n = 10)

for (i in sigList_BM_PlaqueMean_top) {

  print(i)

  print(match(i,sigList_BM_PlaqueMean_top)/length(sigList_BM_PlaqueMean_top))

  Gene_BM_PlaqueMean <<- t(norm_BM_PlaqueMean_counts_regress[i,])
  regress_BM_PlaqueMean <<- cbind(coldata_BM[rownames(Gene_BM_PlaqueMean)], Gene =
t(norm_BM_PlaqueMean_counts_regress[i,]))

```

```

#regress_BM_PlaqueMean$RACE <- relevel(regress_BM_PlaqueMean$RACE, "W")

Gene_archive_BM_PlaqueMean <- cbind(Gene_archive_BM_PlaqueMean,
as.data.frame(t(norm_BM_PlaqueMean_counts_regress[i,])))

model_regress_BM_PlaqueMean = lm(PlaqueMean ~ ApoE4_SNP + Neuron +
regress_BM_PlaqueMean[,i], data=regress_BM_PlaqueMean )

coefs <- data.frame(coef(summary(model_regress_BM_PlaqueMean)))

af <- anova(model_regress_BM_PlaqueMean)
afss <- af$"Sum Sq"
anova_BM <- data.frame()
anova_BM <- (cbind(af,PctExp=afss/sum(afss)*100))
anova_BM <- anova_BM[(nrow(anova_BM)-1),ncol(anova_BM)]
coefs <- cbind(coefs, PropVar = anova_BM)

PropVar_BM_PlaqueMean_Neuron_anova <-
bind_rows(PropVar_BM_PlaqueMean_Neuron_anova, i = coefs[(nrow(coefs)-1),])
PropVar_BM_PlaqueMean_Neuron_relimpo <-
bind_rows(PropVar_BM_PlaqueMean_Neuron_relimpo, relaimpo =
((calc.relimp(model_regress_BM_PlaqueMean, type = c("lmg"), rela = FALSE))$lmg[3])*100)
}

rownames(PropVar_BM_PlaqueMean_Neuron_anova) <- sigList_BM_PlaqueMean_top
rownames(PropVar_BM_PlaqueMean_Neuron_relimpo) <- sigList_BM_PlaqueMean_top

regress_BM_PlaqueMean_Final <- cbind(coldata_BM[rownames(Gene_BM_PlaqueMean),],
Gene_archive_BM_PlaqueMean)

formula_BM_PlaqueMean = paste("PlaqueMean ~ ApoE4_SNP + Neuron +", paste(paste0("'",
sigList_BM_PlaqueMean_top, "'"), collapse = " + "))

fullmodel_BM_PlaqueMean <- lm(formula_BM_PlaqueMean, data = regress_BM_PlaqueMean_Final)

af <- anova(fullmodel_BM_PlaqueMean)
afss <- af$"Sum Sq"
PropVar_fullmodel_BM_PlaqueMean_Neuron_anova <- (cbind(af,PctExp=afss/sum(afss)*100))
PropVar_fullmodel_BM_PlaqueMean_Neuron_relimpo <-
as.data.frame(calc.relimp(fullmodel_BM_PlaqueMean, type = c("lmg"), rela = FALSE)$lmg)
colnames(PropVar_fullmodel_BM_PlaqueMean_Neuron_relimpo) <- "relaimpo_lmg"

```

```

PropVar_fullmodel_BM_PlaqueMean_Neuron_relainpo$relaimpo_lmg <<-
PropVar_fullmodel_BM_PlaqueMean_Neuron_relainpo$relaimpo_lmg*100

}

##BM10
PropVar_analyses_BM10 <- gsub("BM", "BM10", as.list(body(PropVar_analyses)))
#Replace first line to create function
PropVar_analyses_BM10[1] <- "PropVar_analyses_BM10 <- function() {"
#Add last line to end function
PropVar_analyses_BM10[length(PropVar_analyses_BM10)+1] <- "}"
write(PropVar_analyses_BM10, "/home/dubeu/Synapse/PropVar_analyses_BM10.R")

##BM22
PropVar_analyses_BM22 <- gsub("BM", "BM22", as.list(body(PropVar_analyses)))
#Replace first line to create function
PropVar_analyses_BM22[1] <- "PropVar_analyses_BM22 <- function() {"
#Add last line to end function
PropVar_analyses_BM22[length(PropVar_analyses_BM22)+1] <- "}"
write(PropVar_analyses_BM22, "/home/dubeu/Synapse/PropVar_analyses_BM22.R")

##BM36
PropVar_analyses_BM36 <- gsub("BM", "BM36", as.list(body(PropVar_analyses)))
#Replace first line to create function
PropVar_analyses_BM36[1] <- "PropVar_analyses_BM36 <- function() {"
#Add last line to end function
PropVar_analyses_BM36[length(PropVar_analyses_BM36)+1] <- "}"
write(PropVar_analyses_BM36, "/home/dubeu/Synapse/PropVar_analyses_BM36.R")

##BM44
PropVar_analyses_BM44 <- gsub("BM", "BM44", as.list(body(PropVar_analyses)))
#Replace first line to create function
PropVar_analyses_BM44[1] <- "PropVar_analyses_BM44 <- function() {"
#Add last line to end function
PropVar_analyses_BM44[length(PropVar_analyses_BM44)+1] <- "}"
write(PropVar_analyses_BM44, "/home/dubeu/Synapse/PropVar_analyses_BM44.R")

source('/home/dubeu/Synapse/PropVar_analyses_BM10.R')
source('/home/dubeu/Synapse/PropVar_analyses_BM22.R')
source('/home/dubeu/Synapse/PropVar_analyses_BM36.R')
source('/home/dubeu/Synapse/PropVar_analyses_BM44.R')

```

```
PropVar_analyses_BM10()
PropVar_analyses_BM22()
PropVar_analyses_BM36()
PropVar_analyses_BM44()
```

```
#####
#####
## Proportion of Variance Explained parietal ##
#####
#####
```

```
##circHOMER1 correlation
```

```
parietal_circHOMER1_corr_otherTop <- t(norm_parietal_CDR_counts[sigList_parietal_CDR_top,])
cor(parietal_circHOMER1_corr_otherTop)
summary(cor(parietal_circHOMER1_corr_otherTop)[1,2:ncol(parietal_circHOMER1_corr_otherTop)])
```

```
##Estimated proportion of variance for CDR
```

```
PropVar_parietal_CDR_Neuron_anova <- data.frame()
PropVar_parietal_CDR_Neuron_relaimpo <- data.frame()
Gene_archive_parietal_CDR <- data.frame(row.names =
rownames(t(norm_parietal_CDR_counts_regress)))
# this will get the intersection of the row.names for everything in the list
sigList_parietal_CDR = subset(as.data.frame(both_CDR_BM44), i_adjpv < 0.05)
sigList_parietal_CDR = sigList_parietal_CDR[order(sigList_parietal_CDR$i_adjpv),]
sigList_parietal_CDR = rownames(sigList_parietal_CDR)
sigList_parietal_CDR_top <- head(sigList_parietal_CDR, n = 10)
```

```
for (i in sigList_parietal_CDR_top) {
```

```
  print(i)
```

```
  print(match(i,sigList_parietal_CDR_top)/length(sigList_parietal_CDR_top))
```

```
  Gene_parietal_CDR <- t(norm_parietal_CDR_counts_regress[i,])
  regress_parietal_CDR <- cbind(coldata_parietal[rownames(Gene_parietal_CDR),], Gene =
t(norm_parietal_CDR_counts_regress[i,]))
```

```

Gene_archive_parietal_CDR <- cbind(Gene_archive_parietal_CDR,
as.data.frame(t(norm_parietal_CDR_counts_regress[i,])))

model_regress_parietal_CDR = lm(CDR_e ~ APOE4_final + Neuron + regress_parietal_CDR[,i],
data=regress_parietal_CDR )

coefs <- data.frame(coef(summary(model_regress_parietal_CDR)))

af <- anova(model_regress_parietal_CDR)
afss <- af$"Sum Sq"
anova_parietal <- data.frame()
anova_parietal <- (cbind(af,PctExp=afss/sum(afss)*100))
anova_parietal <- anova_parietal[(nrow(anova_parietal)-1),ncol(anova_parietal)]
coefs <- cbind(coefs, PropVar = anova_parietal)

PropVar_parietal_CDR_Neuron_anova <- bind_rows(PropVar_parietal_CDR_Neuron_anova, i =
coefs[(nrow(coefs)-1),])
PropVar_parietal_CDR_Neuron_relimpo <- bind_rows(PropVar_parietal_CDR_Neuron_relimpo,
relimpo = ((calc.relimp(model_regress_parietal_CDR, type = c("lmg"), rela = FALSE))$lmg[3])*100
}

rownames(PropVar_parietal_CDR_Neuron_anova) <- sigList_parietal_CDR_top
rownames(PropVar_parietal_CDR_Neuron_relimpo) <- sigList_parietal_CDR_top

regress_parietal_CDR_e <- cbind(coldata_parietal[rownames(Gene_parietal_CDR),],
Gene_archive_parietal_CDR)

formula_parietal_CDR = paste("CDR_e ~ APOE4_final + Neuron +", paste(paste0("",
sigList_parietal_CDR_top, ""), collapse = " + "))

fullmodel_parietal_CDR <- lm(formula_parietal_CDR, data = regress_parietal_CDR_e)

af <- anova(fullmodel_parietal_CDR)
afss <- af$"Sum Sq"
PropVar_fullmodel_parietal_CDR_Neuron_anova <- (cbind(af,PctExp=afss/sum(afss)*100))
PropVar_fullmodel_parietal_CDR_Neuron_relimpo <-
as.data.frame(calc.relimp(fullmodel_parietal_CDR, type = c("lmg"), rela = FALSE)$lmg)
colnames(PropVar_fullmodel_parietal_CDR_Neuron_relimpo) <- "relimpo_lmg"
PropVar_fullmodel_parietal_CDR_Neuron_relimpo$relimpo_lmg <-
PropVar_fullmodel_parietal_CDR_Neuron_relimpo$relimpo_lmg*100

##Estimated proportion of variance for braak

```

```

PropVar_parietal_braak_Neuron_anova <- data.frame()
PropVar_parietal_braak_Neuron_relimpo <- data.frame()
Gene_archive_parietal_braak <- data.frame(row.names =
rownames(t(norm_parietal_braak_counts_regress)))
# this will get the intersection of the row.names for everything in the list
sigList_parietal_braak = subset(as.data.frame(both_braak_BM44), i_adjpv < 0.05)
sigList_parietal_braak = sigList_parietal_braak[order(sigList_parietal_braak$i_adjpv),]
sigList_parietal_braak = rownames(sigList_parietal_braak)
sigList_parietal_braak_top <- head(sigList_parietal_braak, n = 10)

for (i in sigList_parietal_braak_top) {

  print(i)

  print(match(i,sigList_parietal_braak_top)/length(sigList_parietal_braak_top))

  Gene_parietal_braak <- t(norm_parietal_braak_counts_regress[i,])
  regress_parietal_braak <- cbind(coldata_parietal[rownames(Gene_parietal_braak),], Gene =
t(norm_parietal_braak_counts_regress[i,]))

  Gene_archive_parietal_braak <- cbind(Gene_archive_parietal_braak,
as.data.frame(t(norm_parietal_braak_counts_regress[i,])))

  model_regress_parietal_braak = lm(braak_final ~ APOE4_final + Neuron + regress_parietal_braak[,i],
data=regress_parietal_braak )

  coefs <- data.frame(coef(summary(model_regress_parietal_braak)))

  af <- anova(model_regress_parietal_braak)
  afss <- af$"Sum Sq"
  anova_parietal <- data.frame()
  anova_parietal <- (cbind(af,PctExp=afss/sum(afss)*100))
  anova_parietal <- anova_parietal[(nrow(anova_parietal)-1),ncol(anova_parietal)]
  coefs <- cbind(coefs, PropVar = anova_parietal)

  PropVar_parietal_braak_Neuron_anova <- bind_rows(PropVar_parietal_braak_Neuron_anova, i
= coefs[(nrow(coefs)-1),])
  PropVar_parietal_braak_Neuron_relimpo <- bind_rows(PropVar_parietal_braak_Neuron_relimpo,
relaimpo = ((calc.relimp(model_regress_parietal_braak, type = c("lmg"), rela = FALSE))$lmg[3])*100)
}

rownames(PropVar_parietal_braak_Neuron_anova) <- sigList_parietal_braak_top

```

```

rownames(PropVar_parietal_braak_Neuron_relimpo) <- sigList_parietal_braak_top

regress_parietal_braak_Final <- cbind(coldata_parietal[rownames(Gene_parietal_braak)],
Gene_archive_parietal_braak)

formula_parietal_braak = paste("braak_final ~ APOE4_final + Neuron +", paste(paste0("'",
sigList_parietal_braak_top, "'"), collapse = " + "))

fullmodel_parietal_braak <- lm(formula_parietal_braak, data = regress_parietal_braak_Final)

af <- anova(fullmodel_parietal_braak)
afss <- af$"Sum Sq"
PropVar_fullmodel_parietal_braak_Neuron_anova <- (cbind(af,PctExp=afss/sum(afss)*100))
PropVar_fullmodel_parietal_braak_Neuron_relimpo <-
as.data.frame(calc.relimp(fullmodel_parietal_braak, type = c("lmg"), rela = FALSE)$lmg)
colnames(PropVar_fullmodel_parietal_braak_Neuron_relimpo) <- "relaimpo_lmg"
PropVar_fullmodel_parietal_braak_Neuron_relimpo$relaimpo_lmg <-
PropVar_fullmodel_parietal_braak_Neuron_relimpo$relaimpo_lmg*100

####ADAD

##Estimated proportion of variance for braak

PropVar_parietalADAD_braak_Neuron_anova <- data.frame()
PropVar_parietalADAD_braak_Neuron_relimpo <- data.frame()
Gene_archive_parietalADAD_braak <- data.frame(row.names =
rownames(t(norm_parietalADAD_condition_counts_regress)))
# this will get the intersection of the row.names for everything in the list
#sigList_parietalADAD_braak = subset(as.data.frame(both_braak_BM44), i_adjpv < 0.05)
sigList_parietalADAD_braak =
subset(as.data.frame(res_parietalADAD_conditionBraak_filter_ADADvsLOAD), padj < 0.05)
sigList_parietalADAD_braak = sigList_parietalADAD_braak[order(sigList_parietalADAD_braak$padj),]
sigList_parietalADAD_braak = rownames(sigList_parietalADAD_braak)
sigList_parietalADAD_braak_top <- head(sigList_parietalADAD_braak, n = 10)

for (i in sigList_parietalADAD_braak_top) {

  print(i)

  print(match(i,sigList_parietalADAD_braak_top)/length(sigList_parietalADAD_braak_top))

  Gene_parietalADAD_braak <- t(norm_parietalADAD_condition_counts_regress[i,])

```



```
regress_parietalADAD_braak <- cbind(coldata_parietalADAD[rownames(Gene_parietalADAD_braak),],  
Gene = t(norm_parietalADAD_condition_counts_regress[i,]))
```

```
regress_parietalADAD_braak <- subset(regress_parietalADAD_braak,  
as.character(condition)=="ADAD")
```

```
Gene_archive_parietalADAD_braak <- cbind(Gene_archive_parietalADAD_braak,  
as.data.frame(t(norm_parietalADAD_condition_counts_regress[i,])))
```

```
model_regress_parietalADAD_braak = lm(braak_final ~ APOE4_final + Neuron +  
regress_parietalADAD_braak[,i], data=regress_parietalADAD_braak )
```

```
coefs <- data.frame(coef(summary(model_regress_parietalADAD_braak)))
```

```
af <- anova(model_regress_parietalADAD_braak)  
afss <- af$"Sum Sq"  
anova_parietalADAD <- data.frame()  
anova_parietalADAD <- (cbind(af,PctExp=afss/sum(afss)*100))  
anova_parietalADAD <- anova_parietalADAD[(nrow(anova_parietalADAD)-  
1),ncol(anova_parietalADAD)]  
coefs <- cbind(coefs, PropVar = anova_parietalADAD)
```

```
PropVar_parietalADAD_braak_Neuron_anova <-  
bind_rows(PropVar_parietalADAD_braak_Neuron_anova, i = coefs[(nrow(coefs)-1),])  
PropVar_parietalADAD_braak_Neuron_relimpo <-  
bind_rows(PropVar_parietalADAD_braak_Neuron_relimpo, relaimpo =  
((calc.relimp(model_regress_parietalADAD_braak, type = c("lmg"), rela = FALSE))$lmg[3])*100  
)
```

```
rownames(PropVar_parietalADAD_braak_Neuron_anova) <- sigList_parietalADAD_braak_top  
rownames(PropVar_parietalADAD_braak_Neuron_relimpo) <- sigList_parietalADAD_braak_top
```

```
regress_parietalADAD_braak_Final <-  
cbind(coldata_parietalADAD[rownames(Gene_parietalADAD_braak),],  
Gene_archive_parietalADAD_braak)
```

```
regress_parietalADAD_braak_Final <- subset(regress_parietalADAD_braak_Final,  
as.character(condition)=="ADAD")
```

```
formula_parietalADAD_braak = paste("braak_final ~ APOE4_final + Neuron +", paste(paste0("'",  
sigList_parietalADAD_braak_top, "'"), collapse = " + "))
```

```
fullmodel_parietalADAD_braak <- lm(formula_parietalADAD_braak, data =  
regress_parietalADAD_braak_Final)
```

```
af <- anova(fullmodel_parietalADAD_braak)
afss <- af$"Sum Sq"
PropVar_fullmodel_parietalADAD_braak_Neuron_anova <- (cbind(af,PctExp=afss/sum(afss)*100))
PropVar_fullmodel_parietalADAD_braak_Neuron_relimpo <-
as.data.frame(calc.relimp(fullmodel_parietalADAD_braak, type = c("lmg"), rela = FALSE)$lmg)
colnames(PropVar_fullmodel_parietalADAD_braak_Neuron_relimpo) <- "relaimpo_lmg"
PropVar_fullmodel_parietalADAD_braak_Neuron_relimpo$relaimpo_lmg <-
PropVar_fullmodel_parietalADAD_braak_Neuron_relimpo$relaimpo_lmg*100
```

```
#####
#####
## Proportion of Variance Explained Numbers ##
#####
#####
```

```
summary(PropVar_parietal_CDR_Neuron_relimpo)
```

```
sum(PropVar_fullmodel_parietal_CDR_Neuron_relimpo[3:nrow(PropVar_fullmodel_parietal_CDR_Neuron_relimpo),])
summary(PropVar_fullmodel_parietal_CDR_Neuron_relimpo[3:nrow(PropVar_fullmodel_parietal_CDR_Neuron_relimpo),])
```

```
summary(PropVar_BM44_CDR_Neuron_relimpo)
```

```
sum(PropVar_fullmodel_BM44_CDR_Neuron_relimpo[3:nrow(PropVar_fullmodel_BM44_CDR_Neuron_relimpo),])
summary(PropVar_fullmodel_BM44_CDR_Neuron_relimpo[3:nrow(PropVar_fullmodel_BM44_CDR_Neuron_relimpo),])
```

```
summary(PropVar_parietalADAD_braak_Neuron_relimpo)
```

```
sum(PropVar_fullmodel_parietalADAD_braak_Neuron_relimpo[3:nrow(PropVar_fullmodel_parietalADAD_braak_Neuron_relimpo),])
summary(PropVar_fullmodel_parietalADAD_braak_Neuron_relimpo[3:nrow(PropVar_fullmodel_parietalADAD_braak_Neuron_relimpo),])
```

```
...
```

## ROCC and AUC Analyses

```
#####
## Dube et al., 2019 - circRNAs in AD ##
```

```
#####
```

```
##Author: Umber Dube  
##Contact: udube@wustl.edu
```

```
##Code Section: Predictive Utility Analyses  
``{r}
```

```
#####  
#####  
##### AUC and ROC curves #####  
#####  
#####
```

```
#https://gist.github.com/jwaage/6d8f4eb096e4f18a0894ca1ce27af834  
ggroc <- function(roc, showAUC = TRUE, interval = 0.2, breaks = seq(0, 1, interval), TITLE = "TITLE"){  
  require(pROC)  
  if(class(roc) != "roc")  
    simpleError("Please provide roc object from pROC package")  
  plotx <- rev(roc$specificities)  
  ploty <- rev(roc$sensitivities)  
  
  ggplot(NULL, aes(x = plotx, y = ploty)) +  
    geom_segment(aes(x = 0, y = 1, xend = 1, yend = 0), alpha = 0.5) +  
    geom_step() +  
    scale_x_reverse(name = "Specificity", limits = c(1,0), breaks = breaks, expand = c(0.001,0.001)) +  
    scale_y_continuous(name = "Sensitivity", limits = c(0,1), breaks = breaks, expand = c(0.001, 0.001)) +  
    theme_bw() +  
    theme(axis.ticks = element_line(color = "grey80")) +  
    coord_equal() +  
    annotate("text", x = 0.7, y = 0.6, vjust = 0, label = paste("AUC =", sprintf("%.3f", roc$auc))) +  
    ggtitle(TITLE)  
}
```

```
library(ggplot2)  
library(dplyr)  
#https://gist.github.com/Teebusch/db0ab76d31fd31a13ccf93afa7d77df5  
#https://stackoverflow.com/questions/21887088/generate-a-filled-geom-step  
ggroc_multi <- function(roc1, roc2, roc3, showAUC = TRUE, interval = 0.2, breaks = seq(0, 1, interval),  
TITLE = "TITLE"){  
  require(pROC)  
  plotx1 <- rev(roc1$specificities)
```

```

ploty1<- rev(roc1$sensitivities)
plotx2 <- rev(roc2$specificities)
ploty2<- rev(roc2$sensitivities)
plotx3 <- rev(roc3$specificities)
ploty3<- rev(roc3$sensitivities)

plotx <- c(plotx1, plotx2, plotx3)
ploty <- c(ploty1, ploty2, ploty3)
label <- c(rep("Base",length(ploty1)),rep("Circ",length(ploty2)),rep("Circ+Base",length(ploty3)))

df1 = as.data.frame(cbind(plotx1, ploty1))
df_areaStep1 <- bind_rows(old = df1,
  new = df1 %>% mutate(y = lag(ploty1)), .id = "Base") %>% arrange(plotx1, Base)
df_areaStep1$label="Base"
colnames(df_areaStep1) <- c("Base","plotx","ploty","y","label")

df2 = as.data.frame(cbind(plotx2, ploty2))
df_areaStep2 <- bind_rows(old = df2,
  new = df2 %>% mutate(y = lag(ploty2)), .id = "Circ") %>% arrange(plotx2, Circ)
df_areaStep2$label="Circ"
colnames(df_areaStep2) <- c("Base","plotx","ploty","y","label")

df3 = as.data.frame(cbind(plotx3, ploty3))
df_areaStep3 <- bind_rows(old = df3,
  new = df3 %>% mutate(y = lag(ploty3)), .id = "Circ+Base") %>% arrange(plotx3,
`Circ+Base`)
df_areaStep3$label="Circ+Base"
colnames(df_areaStep3) <- c("Base","plotx","ploty","y","label")

df_areaStepFinal <- bind_rows(df_areaStep1, df_areaStep2, df_areaStep3)
df_areaStepFinal$label <- as.factor(df_areaStepFinal$label)

ggplot(NULL, aes(x = plotx, y = ploty, color=label)) +
  geom_step(size=1.5) +
  geom_ribbon(aes(x = plotx, ymin = 0, ymax = ploty, fill=label),alpha=0.2, color=NA, data =
df_areaStep3) +
  geom_ribbon(aes(x = plotx, ymin = 0, ymax = ploty, fill=label),alpha=0.2, color=NA, data =
df_areaStep2) +
  geom_ribbon(aes(x = plotx, ymin = 0, ymax = ploty, fill=label),alpha=0.2, color=NA, data =
df_areaStep1) +
  scale_x_reverse(name = "Specificity",limits = c(1,0), breaks = breaks, expand = c(0.001,0.001)) +
  scale_y_continuous(name = "Sensitivity", limits = c(0,1), breaks = breaks, expand = c(0.001, 0.001)) +
  theme_bw() +
  theme(axis.ticks = element_line(color = "grey80")) +

```

```

    coord_equal() + ggtitle(TITLE) + scale_color_manual(values=c("darkblue", "darkred",
"darkmagenta"),name="Model") + scale_fill_manual(values=c("darkblue", "darkred",
"darkmagenta"),name="Model") + theme(plot.title = element_text(hjust = 0.5),
legend.text=element_text(size=12), legend.title=element_text(size=12))

#ggplot(NULL, aes(x = plotx, y = ploty, color=label)) +
#geom_step(size=1.5) +
#geom_ribbon(aes(x = plotx, ymin = 0, ymax = ploty, fill=label),alpha=0.2, color=NA, data =
df_areaStepFinal) +
#scale_x_reverse(name = "Specificity",limits = c(1,0), breaks = breaks, expand = c(0.001,0.001)) +
#scale_y_continuous(name = "Sensitivity", limits = c(0,1), breaks = breaks, expand = c(0.001, 0.001)) +
#theme_bw() +
#theme(axis.ticks = element_line(color = "grey80")) +
#coord_equal() + ggtitle(TITLE)

}

```

```
MSBB_ROC_AUC <- function() {
```

```
##Base model
```

```

coldata_BM_normcounts <- as.data.frame(cbind(colData(dds_BM_final_condition_filter),
t(norm_BM_condition_counts)))
coldata_BM_normcounts <- subset(coldata_BM_normcounts, as.numeric(NP.1) <= 2)
coldata_BM_normcounts$NP.1 <- droplevels(coldata_BM_normcounts$NP.1)

```

```

mylogit_base_BM <- glm(NP.1 ~ PMI + TIN.median. + AOD + batch + SEX + PC1 + PC2 + ApoE4_SNP,
data = coldata_BM_normcounts, family = "binomial")
summary(mylogit_base_BM)
prob_base_BM=predict(mylogit_base_BM,type=c("response"))
coldata_BM_normcounts$prob_base_BM=prob_base_BM
library(pROC)
g_base_BM <- roc(NP.1 ~ prob_base_BM, data = coldata_BM_normcounts)
ggroc(g_base_BM, TITLE="BM Base")

```

```
##Circ Model
```

```

sigList_BM_CDR = subset(as.data.frame(both_CDR_BM), i_adjpv < 0.05)
sigList_BM_CDR = sigList_BM_CDR[order(sigList_BM_CDR$i_adjpv),]
sigList_BM_CDR = rownames(sigList_BM_CDR)
sigList_BM_CDR_top <- head(sigList_BM_CDR, n = 10)

```

```

mylogit_circ_BM <- glm(paste("NP.1 ~", paste(paste0("'", gsub("-", ".", sigList_BM_CDR_top), "'"),
collapse = " + ")), data = coldata_BM_normcounts, family = "binomial")
summary(mylogit_circ_BM)
prob_circ_BM=predict(mylogit_circ_BM,type=c("response"))
coldata_BM_normcounts$prob_circ_BM=prob_circ_BM
library(pROC)
g_circ_BM <- roc(NP.1 ~ prob_circ_BM, data = coldata_BM_normcounts)
ggroc(g_circ_BM, TITLE="BM Circ")

```

```
##Base + Circ Model
```

```

sigList_BM_CDR = subset(as.data.frame(both_CDR_BM), i_adjval < 0.05)
sigList_BM_CDR = sigList_BM_CDR[order(sigList_BM_CDR$i_adjval),]
sigList_BM_CDR = rownames(sigList_BM_CDR)
sigList_BM_CDR_top <- head(sigList_BM_CDR, n = 10)

```

```

mylogit_base_circ_BM <- glm(paste("NP.1 ~ PMI + TIN.median. + AOD + batch + SEX + PC1 + PC2 +
ApoE4_SNP +", paste(paste0("'", gsub("-", ".", sigList_BM_CDR_top), "'"), collapse = " + ")), data =
coldata_BM_normcounts, family = "binomial")
summary(mylogit_base_circ_BM)
prob_base_circ_BM=predict(mylogit_base_circ_BM,type=c("response"))
coldata_BM_normcounts$prob_base_circ_BM=prob_base_circ_BM
library(pROC)
g_base_circ_BM <- roc(NP.1 ~ prob_base_circ_BM, data = coldata_BM_normcounts)

```

```
##Return all plots
```

```

list(ggroc(g_base_BM, TITLE="BM Base"), ggroc(g_circ_BM, TITLE="BM CIRC"), ggroc(g_base_circ_BM,
TITLE="BM Base+CIRC"), ggroc_multi(g_base_BM, g_circ_BM, g_base_circ_BM, TITLE="Relative
Predictive Ability - AMP-AD: MSBB BM"))

```

```
}
```

```
##BM10
```

```

MSBB_ROC_AUC_BM10 <- gsub("BM", "BM10", as.list(body(MSBB_ROC_AUC)))
#Replace first line to create function
MSBB_ROC_AUC_BM10[1] <- "MSBB_ROC_AUC_BM10 <- function() {"
#Replace first line to end function
MSBB_ROC_AUC_BM10[length(MSBB_ROC_AUC_BM10)+1] <- "}"
write(MSBB_ROC_AUC_BM10, "/home/dubeu/Synapse/MSBB_ROC_AUC_BM10.R")

```

```
##BM22
```

```

MSBB_ROC_AUC_BM22 <- gsub("BM", "BM22", as.list(body(MSBB_ROC_AUC)))
#Replace first line to create function
MSBB_ROC_AUC_BM22[1] <- "MSBB_ROC_AUC_BM22 <- function() {"
#Replace first line to end function
MSBB_ROC_AUC_BM22[length(MSBB_ROC_AUC_BM22)+1] <- "}"
write(MSBB_ROC_AUC_BM22, "/home/dubeu/Synapse/MSBB_ROC_AUC_BM22.R")

```

```

##BM36
MSBB_ROC_AUC_BM36 <- gsub("BM", "BM36", as.list(body(MSBB_ROC_AUC)))
#Replace first line to create function
MSBB_ROC_AUC_BM36[1] <- "MSBB_ROC_AUC_BM36 <- function() {"
#Replace first line to end function
MSBB_ROC_AUC_BM36[length(MSBB_ROC_AUC_BM36)+1] <- "}"
write(MSBB_ROC_AUC_BM36, "/home/dubeu/Synapse/MSBB_ROC_AUC_BM36.R")

```

```

##BM44
MSBB_ROC_AUC_BM44 <- gsub("BM", "BM44", as.list(body(MSBB_ROC_AUC)))
#Replace first line to create function
MSBB_ROC_AUC_BM44[1] <- "MSBB_ROC_AUC_BM44 <- function() {"
#Replace first line to end function
MSBB_ROC_AUC_BM44[length(MSBB_ROC_AUC_BM44)+1] <- "}"
write(MSBB_ROC_AUC_BM44, "/home/dubeu/Synapse/MSBB_ROC_AUC_BM44.R")

```

```

source('/home/dubeu/Synapse/MSBB_ROC_AUC_BM10.R')
source('/home/dubeu/Synapse/MSBB_ROC_AUC_BM22.R')
source('/home/dubeu/Synapse/MSBB_ROC_AUC_BM36.R')
source('/home/dubeu/Synapse/MSBB_ROC_AUC_BM44.R')

```

```

MSBB_ROC_AUC_BM10()
MSBB_ROC_AUC_BM22()
MSBB_ROC_AUC_BM36()
MSBB_ROC_AUC_BM44()

```

```

##Parietal

```

```

coldata_parietal_normcounts <- as.data.frame(cbind(colData(dds_parietal_final_condition_filter),
t(norm_parietal_condition_counts)))
coldata_parietal_normcounts <- coldata_parietal_normcounts[which(
as.character(coldata_parietal_normcounts$condition) == "CO" |
as.character(coldata_parietal_normcounts$condition) == "LOAD"),]

```

```
coldata_parietal_normcounts$condition <- droplevels(coldata_parietal_normcounts$condition)
```

```
#Base
```

```
mylogit_base_parietal <- glm(condition ~ PMI + TIN.median. + AGE_at_death + pool + GENDER + PC1 +  
PC2 + APOE4_final, data = coldata_parietal_normcounts, family = "binomial")  
summary(mylogit_base_parietal)  
prob_base_parietal=predict(mylogit_base_parietal,type=c("response"))  
coldata_parietal_normcounts$prob_base_parietal=prob_base_parietal  
library(pROC)  
g_base_parietal <- roc(condition ~ prob_base_parietal, data = coldata_parietal_normcounts)  
ggroc(g_base_parietal, TITLE="Parietal Base")
```

```
sigList_BM44_CDR = subset(as.data.frame(both_CDR_BM44), i_adjpv < 0.05)  
sigList_BM44_CDR = sigList_BM44_CDR[order(sigList_BM44_CDR$i_adjpv),]  
sigList_BM44_CDR = rownames(sigList_BM44_CDR)  
sigList_BM44_CDR_top <- head(sigList_BM44_CDR, n = 10)
```

```
#Circ
```

```
mylogit_circ_parietal <- glm(paste("condition ~", paste(paste0("`", gsub("-", ".", sigList_BM44_CDR_top),  
"`"), collapse = " + ")), data = coldata_parietal_normcounts, family = "binomial")  
summary(mylogit_circ_parietal)  
prob_circ_parietal=predict(mylogit_circ_parietal,type=c("response"))  
coldata_parietal_normcounts$prob_circ_parietal=prob_circ_parietal  
library(pROC)  
g_circ_parietal <- roc(condition ~ prob_circ_parietal, data = coldata_parietal_normcounts)  
ggroc(g_circ_parietal, TITLE="Parietal Circ")
```

```
sigList_BM44_CDR = subset(as.data.frame(both_CDR_BM44), i_adjpv < 0.05)  
sigList_BM44_CDR = sigList_BM44_CDR[order(sigList_BM44_CDR$i_adjpv),]  
sigList_BM44_CDR = rownames(sigList_BM44_CDR)  
sigList_BM44_CDR_top <- head(sigList_BM44_CDR, n = 10)
```

```
#Base + Circ
```

```
mylogit_base_circ_parietal <- glm(paste("condition ~ PMI + TIN.median. + AGE_at_death + pool +  
GENDER + PC1 + PC2 + APOE4_final +", paste(paste0("`", gsub("-", ".", sigList_BM44_CDR_top), "`"),  
collapse = " + ")), data = coldata_parietal_normcounts, family = "binomial")  
summary(mylogit_base_circ_parietal)  
prob_base_circ_parietal=predict(mylogit_base_circ_parietal,type=c("response"))  
coldata_parietal_normcounts$prob_base_circ_parietal=prob_base_circ_parietal
```



```

library(pROC)
g_base_circ_parietal <- roc(condition ~ prob_base_circ_parietal, data = coldata_parietal_normcounts)
ggroc(g_base_circ_parietal, TITLE="Parietal Base+Circ")

#Final plot
ggroc_multi(g_base_parietal, g_circ_parietal, g_base_circ_parietal, TITLE="Relative Predictive Ability -
Knight-ADRC: Parietal")

```

...

## Co-expression Network Analyses

### Processing Code

```

#####
## Dube et al., 2019 - circRNAs in AD ##
#####

```

```

##Author: Umber Dube
##Contact: udube@wustl.edu

```

```

##Code Section: Co-Expression Network Analyses
``{r}

```

```

#####
#####
### MEGENA Generation Code - Parietal ###
#####
#####

```

```

##load Parietal phenotype / covariate information
coldata_parietal_salmon <- read.csv(file="/40/AD/Expression/KnightADRCParietal/03.-
phenotype/Pheno.csv", header=TRUE, na.strings = "NA")

```

```

#Restrict analyses to parietal tissues
coldata_parietal_salmon <- subset(coldata_parietal_salmon, brain_region == "parietal")

```

```

#Rename
coldata_parietal_salmon$ID_RNAseq <- gsub("VY.", "VY-", coldata_parietal_salmon$ID_RNAseq)

```

```

#Temporarily Assigning Ethnicity#
coldata_parietal_salmon$Ethnicity <- coldata_parietal_salmon$Ethnicity_temp

```

```

##Remove Consensus Outliers
coldata_parietal_salmon <- subset(coldata_parietal_salmon, ConsensusOutlier_RemoveBefore != 1)

#Set up factor levels
coldata_parietal_salmon$pool <- factor(coldata_parietal_salmon$pool, levels=c('1','2'))
coldata_parietal_salmon$GENDER <- factor(coldata_parietal_salmon$GENDER, levels=c('1','2'))
coldata_parietal_salmon$Ethnicity <- factor(coldata_parietal_salmon$Ethnicity, levels = c("EA", "AA"))
coldata_parietal_salmon$condition <- droplevels(coldata_parietal_salmon$condition)

#####
#####
##
#####
#####

#Quasi
dir <- "/home/dubeu/Synapse/Salmon/quasi"

#fmd
#dir <- "/home/dubeu/Synapse/Salmon/fmd/"

#Only Protein Coding
#tx2gene <- read.table("/40/AD/Expression/KnightADRCParietal/06.-
References/gencode.v26_transcriptID_to_geneID_final_proteincoding")

#All
#tx2gene <- read.table("/40/AD/Expression/KnightADRCParietal/06.-
References/gencode.v26_transcriptID_to_geneID_final")

#Quasi
tx2gene <- read.table("/40/AD/Expression/KnightADRCParietal/06.-
References/gencode.v26.metadata.HGNC")

files <- file.path(dir, coldata_parietal_salmon$ID_RNAseq, "quant.sf")
names(files) <- coldata_parietal_salmon$ID_RNAseq

txi <- tximport(files, type="salmon", tx2gene=tx2gene, dropInfReps=TRUE)

```

```
#coldata_parietal_salmon$ID_RNAseq <- gsub("VY-", "VY.", coldata_parietal_salmon$ID_RNAseq)
rownames(coldata_parietal_salmon) <- coldata_parietal_salmon$ID_RNAseq
```

```
#####
#####
## DE Analyses ##
#####
#####
```

```
##DE based on condition ##
```

```
#####
## Filtering QC ##
## via: https://support.bioconductor.org/p/65256/ ##
## triplicate by lowest number: https://support.bioconductor.org/p/49710/ ##
#####
```

```
dds_parietal_salmon_condition_filter <- DESeqDataSetFromTximport(txi, colData =
coldata_parietal_salmon, design = ~ 1)
```

```
dds_parietal_salmon_condition_filter <- estimateSizeFactors(dds_parietal_salmon_condition_filter)
```

```
##subset based on covars so that none are missing
```

```
#Remove dementedcontrols
```

```
dds_parietal_salmon_condition_filter <- dds_parietal_salmon_condition_filter[,
!(dds_parietal_salmon_condition_filter$DementedControl == 1)]
```

```
dds_parietal_salmon_condition_filter <- dds_parietal_salmon_condition_filter[
,!is.na(dds_parietal_salmon_condition_filter$AGE_at_death)]
```

```
dds_parietal_salmon_condition_filter <- dds_parietal_salmon_condition_filter[
,!is.na(dds_parietal_salmon_condition_filter$PMI)]
```

```
dds_parietal_salmon_condition_filter <- dds_parietal_salmon_condition_filter[
,!is.na(dds_parietal_salmon_condition_filter$PC1)]
```

```
dds_parietal_salmon_condition_filter <- dds_parietal_salmon_condition_filter[
,!is.na(dds_parietal_salmon_condition_filter$PC2)]
```

```
design(dds_parietal_salmon_condition_filter) = formula( ~ PMI + TIN.median. + AGE_at_death + pool +
GENDER + PC1 + PC2 + condition)
```

```
dds_parietal_salmon_final_condition_filter <- DESeq(dds_parietal_salmon_condition_filter, parallel =
TRUE, betaPrior = FALSE)
```

```
##Analyze results based on contrast
```

```
res_parietal_salmon_condition_filter <- results(dds_parietal_salmon_final_condition_filter,
contrast=c("condition", "LOAD", "CO"), alpha = 0.05)
summary(res_parietal_salmon_condition_filter)
```

```
##DE based on braak ##
```

```
#####
```

```
## Filtering QC ##
```

```
## via: https://support.bioconductor.org/p/65256/ ##
```

```
## triplicate by lowest number: https://support.bioconductor.org/p/49710/ ##
```

```
#####
```

```
dds_parietal_salmon_braak_filter <- DESeqDataSetFromTximport(txi, colData =
coldata_parietal_salmon, design = ~ 1)
```

```
dds_parietal_salmon_braak_filter <- estimateSizeFactors(dds_parietal_salmon_braak_filter)
```

```
#Remove dementedcontrols
```

```
dds_parietal_salmon_braak_filter <- dds_parietal_salmon_braak_filter[,
!(dds_parietal_salmon_braak_filter$DementedControl == 1)]
```

```
dds_parietal_salmon_braak_filter <- dds_parietal_salmon_braak_filter[
,!is.na(dds_parietal_salmon_braak_filter$AGE_at_death)]
```

```
dds_parietal_salmon_braak_filter <- dds_parietal_salmon_braak_filter[
,!is.na(dds_parietal_salmon_braak_filter$PMI)]
```

```
dds_parietal_salmon_braak_filter <- dds_parietal_salmon_braak_filter[
,!is.na(dds_parietal_salmon_braak_filter$braak_final)]
```

```
dds_parietal_salmon_braak_filter <- dds_parietal_salmon_braak_filter[
,!is.na(dds_parietal_salmon_braak_filter$PC1)]
```

```
dds_parietal_salmon_braak_filter <- dds_parietal_salmon_braak_filter[
,!is.na(dds_parietal_salmon_braak_filter$PC2)]
```

```

##Only include LOAD and controls
dds_parietal_salmon_braak_filter <- dds_parietal_salmon_braak_filter[
,dds_parietal_salmon_braak_filter$condition != "ADAD" ]
dds_parietal_salmon_braak_filter$condition <- droplevels(dds_parietal_salmon_braak_filter$condition)

design(dds_parietal_salmon_braak_filter) = formula( ~ PMI + TIN.median. + AGE_at_death + pool +
GENDER + PC1 + PC2 + braak_final)

dds_parietal_salmon_final_braak_filter <- DESeq(dds_parietal_salmon_braak_filter, parallel = TRUE,
betaPrior = FALSE)

res_parietal_salmon_braak_filter <- results(dds_parietal_salmon_final_braak_filter, alpha = 0.05)
summary(res_parietal_salmon_braak_filter)

##DE based on CDR ##

#####
## Filtering QC ##
## via: https://support.bioconductor.org/p/65256/ ##
## triplicate by lowest number: https://support.bioconductor.org/p/49710/ ##
#####

dds_parietal_salmon_CDR_filter <- DESeqDataSetFromTximport(txi, colData = coldata_parietal_salmon,
design = ~ 1)

dds_parietal_salmon_CDR_filter <- estimateSizeFactors(dds_parietal_salmon_CDR_filter)

#Remove dementedcontrols
dds_parietal_salmon_CDR_filter <- dds_parietal_salmon_CDR_filter[,
!(dds_parietal_salmon_CDR_filter$DementedControl == 1)]

dds_parietal_salmon_CDR_filter <- dds_parietal_salmon_CDR_filter[
,!is.na(dds_parietal_salmon_CDR_filter$AGE_at_death)]
dds_parietal_salmon_CDR_filter <- dds_parietal_salmon_CDR_filter[
,!is.na(dds_parietal_salmon_CDR_filter$PMI)]
dds_parietal_salmon_CDR_filter <- dds_parietal_salmon_CDR_filter[
,!is.na(dds_parietal_salmon_CDR_filter$CDR_e)]

```

```

dds_parietal_salmon_CDR_filter <- dds_parietal_salmon_CDR_filter[
, !is.na(dds_parietal_salmon_CDR_filter$PC1)]
dds_parietal_salmon_CDR_filter <- dds_parietal_salmon_CDR_filter[
, !is.na(dds_parietal_salmon_CDR_filter$PC2)]

##Only include LOAD and controls
dds_parietal_salmon_CDR_filter <- dds_parietal_salmon_CDR_filter[
, dds_parietal_salmon_CDR_filter$condition != "ADAD" ]
dds_parietal_salmon_CDR_filter$condition <- droplevels(dds_parietal_salmon_CDR_filter$condition)

design(dds_parietal_salmon_CDR_filter) = formula( ~ PMI + TIN.median. + AGE_at_death + pool +
GENDER + PC1 + PC2 + CDR_e)

dds_parietal_salmon_final_CDR_filter <- DESeq(dds_parietal_salmon_CDR_filter, parallel = TRUE,
betaPrior = FALSE)

##subset based on contrast (categorical) or continuous

res_parietal_salmon_CDR_filter <- results(dds_parietal_salmon_final_CDR_filter, alpha = 0.05)
summary(res_parietal_salmon_CDR_filter)

##For Condition

#vsd_parietal_salmon_condition_linear <-
varianceStabilizingTransformation(dds_parietal_salmon_condition_filter, blind = FALSE)
#norm_parietal_salmon_condition_counts <-
as.data.frame(assay(vsd_parietal_salmon_condition_linear))

##For CDR

vsd_parietal_salmon_CDR_linear <- varianceStabilizingTransformation(dds_parietal_salmon_CDR_filter,
blind = FALSE)
norm_parietal_salmon_CDR_counts <- as.data.frame(assay(vsd_parietal_salmon_CDR_linear))

##For braak

#vsd_parietal_salmon_braak_linear <-
varianceStabilizingTransformation(dds_parietal_salmon_braak_filter, blind = FALSE)
#norm_parietal_salmon_braak_counts <- as.data.frame(assay(vsd_parietal_salmon_braak_linear))

```

```
#####  
#####  
##### Regressing Out Cofactors #####  
#####  
#####
```

```
###Regress out cofactors for parietal_salmon dataset
```

```
##CDR
```

```
mimage_parietal_salmon_CDR=model.matrix(~-  
1+dds_parietal_salmon_CDR_filter$TIN.median.+dds_parietal_salmon_CDR_filter$AGE_at_death+dds_  
parietal_salmon_CDR_filter$GENDER+dds_parietal_salmon_CDR_filter$PMI+dds_parietal_salmon_CDR_  
_filter$PC1+dds_parietal_salmon_CDR_filter$PC2+dds_parietal_salmon_CDR_filter$pool)  
norm_parietal_salmon_CDR_counts_regress=as.data.frame(t(apply(t(norm_parietal_salmon_CDR_coun  
ts),2,function(x){residuals(lm(x~mimage_parietal_salmon_CDR))})))
```

```
##braak
```

```
mimage_parietal_salmon_braak=model.matrix(~-  
1+dds_parietal_salmon_braak_filter$TIN.median.+dds_parietal_salmon_braak_filter$AGE_at_death+dd  
s_parietal_salmon_braak_filter$GENDER+dds_parietal_salmon_braak_filter$PMI+dds_parietal_salmon_  
braak_filter$PC1+dds_parietal_salmon_braak_filter$PC2+dds_parietal_salmon_braak_filter$pool)  
norm_parietal_salmon_braak_counts_regress=as.data.frame(t(apply(t(norm_parietal_salmon_braak_co  
unts),2,function(x){residuals(lm(x~mimage_parietal_salmon_braak))})))
```

```
##condition
```

```
mimage_parietal_salmon_condition=model.matrix(~-  
1+dds_parietal_salmon_condition_filter$TIN.median.+dds_parietal_salmon_condition_filter$AGE_at_d  
eath+dds_parietal_salmon_condition_filter$GENDER+dds_parietal_salmon_condition_filter$PMI+dds_p  
arietal_salmon_condition_filter$PC1+dds_parietal_salmon_condition_filter$PC2+dds_parietal_salmon_  
condition_filter$pool)  
norm_parietal_salmon_condition_counts_regress=as.data.frame(t(apply(t(norm_parietal_salmon_condi  
tion_counts),2,function(x){residuals(lm(x~mimage_parietal_salmon_condition))})))
```

```
colnames(norm_parietal_salmon_CDR_counts_regress) <- gsub("VY-", "VY.",  
colnames(norm_parietal_salmon_CDR_counts_regress))
```

```
colnames(norm_parietal_salmon_braak_counts_regress) <- gsub("VY-", "VY.",  
colnames(norm_parietal_salmon_braak_counts_regress))
```

```

colnames(norm_parietal_salmon_condition_counts_regress) <- gsub("VY-", "VY.",
colnames(norm_parietal_salmon_condition_counts_regress))

system("mkdir -p /home/dubeu/Synapse/NetworkAnalysis/parietal")

write.table(norm_parietal_salmon_CDR_counts_regress,
"/home/dubeu/Synapse/NetworkAnalysis/parietal/norm_parietal_salmon_CDR_counts_regress.txt",
sep = "\t", quote=F)

write.table(norm_parietal_CDR_counts_regress,
"/home/dubeu/Synapse/NetworkAnalysis/parietal/norm_parietal_CDR_counts_regress.txt", sep = "\t",
quote=F)

coldata_parietal_MEs <- as.data.frame(colData(dds_parietal_CDR_filter))
save(coldata_parietal_MEs,file="/home/dubeu/Synapse/NetworkAnalysis/parietal/coldata_parietal.Rda
")

###
#Only include protein coding genes and perform correlation with spearman

#make directory structure on CHPC
system('ssh dubeu@login.chpc.wustl.edu "mkdir -p
/scratch/dubeu/Synapse/NetworkAnalysis/parietal/top10kspearman"')

#prepare batch script for 10k also modify to extend the walltime
system("cat /home/dubeu/Synapse/NetworkAnalysis/Dev/top10kspearman.batch | sed
's/AREA/parietal/g' | sed 's/walltime=24:00:00/walltime=36:00:00/g' >
/home/dubeu/Synapse/NetworkAnalysis/parietal/parietal_top10kspearman.batch")

#prepare R script for 10k
system("cat /home/dubeu/Synapse/NetworkAnalysis/Dev/top10kspearman.R | sed 's/AREA/parietal/g'
> /home/dubeu/Synapse/NetworkAnalysis/parietal/parietal_top10kspearman.R")

#Upload files

#counts
system("scp -r
/home/dubeu/Synapse/NetworkAnalysis/parietal/norm_parietal_CDR_counts_regress.txt
dubeu@dt01.chpc.wustl.edu:/scratch/dubeu/Synapse/NetworkAnalysis/parietal")
system("scp -r
/home/dubeu/Synapse/NetworkAnalysis/parietal/norm_parietal_salmon_CDR_counts_regress.txt
dubeu@dt01.chpc.wustl.edu:/scratch/dubeu/Synapse/NetworkAnalysis/parietal")

```



```

#top10k
system("scp -r /home/dubeu/Synapse/NetworkAnalysis/parietal/parietal_top10kspearman.R
dubeu@dtm01.chpc.wustl.edu:/scratch/dubeu/Synapse/NetworkAnalysis/parietal/top10kspearman")
system("scp -r /home/dubeu/Synapse/NetworkAnalysis/parietal/parietal_top10kspearman.batch
dubeu@dtm01.chpc.wustl.edu:/scratch/dubeu/Synapse/NetworkAnalysis/parietal/top10kspearman")

#protein coding list
system("scp -r /40/AD/Expression/KnightADRCParietal/06.-
References/gencode.v26_transcriptID_to_geneID_final_proteincoding_uniqlist
dubeu@dtm01.chpc.wustl.edu:/scratch/dubeu/Synapse/NetworkAnalysis/")

##Send qsub command top10k
system('ssh dubeu@login.chpc.wustl.edu "qsub
/scratch/dubeu/Synapse/NetworkAnalysis/parietal/top10kspearman/parietal_top10kspearman.batch"')

```

```

#####
#####
### MEGENA Generation Code - Including salmon processing ###
#####
#####

```

```
MEGENA_complete <- function() {
```

```
##Linear Transcriptome differential expression ##
```

```
##Load in phenotype data ##
```

```
coldata_salmon_BM <-
read.csv(file="/home/dubeu/Synapse/AMP_AD/MSBB_Pheno_05_15_2018.csv", header=TRUE,
na.strings = "NA")
coldata_salmon_BM <- subset(coldata_salmon_BM, BrodmannArea=="BM")
```

```
##Set factor levels
```

```
coldata_salmon_BM$NP.1 <- factor(coldata_salmon_BM$NP.1, levels=c('1','2','3','4'))
coldata_salmon_BM$Apo1 <- factor(coldata_salmon_BM$Apo1, levels=c('0','2','3','4'))
coldata_salmon_BM$Apo2 <- factor(coldata_salmon_BM$Apo2, levels=c('0','2','3','4'))
coldata_salmon_BM$RACE <- factor(coldata_salmon_BM$RACE, levels=c('A','B','H','W','U'))
coldata_salmon_BM$RACE <- relevel(coldata_salmon_BM$RACE, "W")
coldata_salmon_BM$SEX <- factor(coldata_salmon_BM$SEX, levels = c("M","F"))
```

```

coldata_salmon_BM$batch <- factor(coldata_salmon_BM$batch, levels =
levels(coldata_salmon_BM$batch))

rownames(coldata_salmon_BM) <- coldata_salmon_BM$sampleIdentifier

##Relevel NP.1
#levels(coldata_BM$NP.1) <- list("1"=c("1"), "2"=c("2","3","4"))

coldata_salmon_BM[(as.character(coldata_salmon_BM$NP.1)=="1" &
coldata_salmon_BM$CDR>=1),]$DementedControl <- 1

#####
#####Salmon Processing#####
#####

#Quasi
dir <- "/home/dubeu/Synapse/AMP_AD/Salmon/quasi/BM"

#fmd
#dir <- "/home/dubeu/Synapse/Salmon/fmd/"

#Only Protein Coding
#tx2gene <- read.table("/40/AD/Expression/KnightADRCParietal/06.-
References/gencode.v26_transcriptID_to_geneID_final_proteinencoding")

#All
#tx2gene <- read.table("/40/AD/Expression/KnightADRCParietal/06.-
References/gencode.v26_transcriptID_to_geneID_final")

#Quasi
tx2gene <- read.table("/40/AD/Expression/KnightADRCParietal/06.-
References/gencode.v26.metadata.HGNC")

files <- file.path(dir, rownames(coldata_salmon_BM), "quant.sf")
names(files) <- rownames(coldata_salmon_BM)

txi_BM <- tximport(files, type="salmon", tx2gene=tx2gene, dropInfReps=TRUE)

##DE based on condition ##

```

```

#####
## Filtering QC ##
## via: https://support.bioconductor.org/p/65256/ ##
## triplicate by lowest number: https://support.bioconductor.org/p/49710/ ##
#####

#dds_BM_salmon_condition_filter <- DESeqDataSetFromTximport(txi_BM, colData =
coldata_salmon_BM, design = ~ 1)

#dds_BM_salmon_condition_filter <- estimateSizeFactors(dds_BM_salmon_condition_filter)

#dds_BM_salmon_condition_filter <- dds_BM_salmon_condition_filter[
,!is.na(dds_BM_salmon_condition_filter$batch)]
#dds_BM_salmon_condition_filter <- dds_BM_salmon_condition_filter[
,!is.na(dds_BM_salmon_condition_filter$PC1)]
#dds_BM_salmon_condition_filter <- dds_BM_salmon_condition_filter[
,!is.na(dds_BM_salmon_condition_filter$PC2)]

#Remove dementedcontrols
#dds_BM_salmon_condition_filter <- dds_BM_salmon_condition_filter[,
!(dds_BM_salmon_condition_filter$DementedControl == 1)]

#dds_BM_salmon_condition_filter$batch <- droplevels(dds_BM_salmon_condition_filter$batch)

#design(dds_BM_salmon_condition_filter) = formula(~ PMI + TIN.median. + AOD + batch + SEX + PC1 +
PC2 + NP.1)

#dds_BM_salmon_final_condition_filter <- DESeq(dds_BM_salmon_condition_filter, parallel = TRUE,
betaPrior = FALSE)

#res_BM_salmon_condition_filter <- results(dds_BM_salmon_final_condition_filter, contrast=c("NP.1",
"2", "1"), alpha = 0.05)
#summary(res_BM_salmon_condition_filter)

##DE based on CDR ##

#####
## Filtering QC ##

```

```

## via: https://support.bioconductor.org/p/65256/ ##
## triplicate by lowest number: https://support.bioconductor.org/p/49710/ ##
#####

dds_BM_salmon_CDR_filter <- DESeqDataSetFromTximport(txi_BM, colData = coldata_salmon_BM,
design = ~ 1)

dds_BM_salmon_CDR_filter <- estimateSizeFactors(dds_BM_salmon_CDR_filter)

dds_BM_salmon_CDR_filter <- dds_BM_salmon_CDR_filter[
,!is.na(dds_BM_salmon_CDR_filter$batch)]
dds_BM_salmon_CDR_filter <- dds_BM_salmon_CDR_filter[,!is.na(dds_BM_salmon_CDR_filter$PC1)]
dds_BM_salmon_CDR_filter <- dds_BM_salmon_CDR_filter[,!is.na(dds_BM_salmon_CDR_filter$PC2)]

dds_BM_salmon_CDR_filter <- dds_BM_salmon_CDR_filter[,!is.na(dds_BM_salmon_CDR_filter$CDR)]

#Remove dementedcontrols
dds_BM_salmon_CDR_filter <- dds_BM_salmon_CDR_filter[
!(dds_BM_salmon_CDR_filter$DementedControl == 1)]

dds_BM_salmon_CDR_filter$batch <- droplevels(dds_BM_salmon_CDR_filter$batch)

design(dds_BM_salmon_CDR_filter) = formula( ~ PMI + TIN.median. + AOD + batch + SEX + PC1 + PC2 +
CDR)

dds_BM_salmon_final_CDR_filter <- DESeq(dds_BM_salmon_CDR_filter, parallel = TRUE, betaPrior =
FALSE)

res_BM_salmon_CDR_filter <- results(dds_BM_salmon_final_CDR_filter, alpha = 0.05)
summary(res_BM_salmon_CDR_filter)

##DE based on braak ##

#####
## Filtering QC ##
## via: https://support.bioconductor.org/p/65256/ ##
## triplicate by lowest number: https://support.bioconductor.org/p/49710/ ##
#####

```

```

#dds_BM_salmon_braak_filter <- DESeqDataSetFromTximport(txi_BM, colData = coldata_salmon_BM,
design = ~ 1)

#dds_BM_salmon_braak_filter <- estimateSizeFactors(dds_BM_salmon_braak_filter)

#dds_BM_salmon_braak_filter <- dds_BM_salmon_braak_filter[
,!is.na(dds_BM_salmon_braak_filter$batch)]
#dds_BM_salmon_braak_filter <- dds_BM_salmon_braak_filter[
,!is.na(dds_BM_salmon_braak_filter$PC1)]
#dds_BM_salmon_braak_filter <- dds_BM_salmon_braak_filter[
,!is.na(dds_BM_salmon_braak_filter$PC2)]

#dds_BM_salmon_braak_filter <- dds_BM_salmon_braak_filter[
,!is.na(dds_BM_salmon_braak_filter$bbscore)]

#Remove dementedcontrols
#dds_BM_salmon_braak_filter <- dds_BM_salmon_braak_filter[,
!(dds_BM_salmon_braak_filter$DementedControl == 1)]

#dds_BM_salmon_braak_filter$batch <- droplevels(dds_BM_salmon_braak_filter$batch)

#design(dds_BM_salmon_braak_filter) = formula( ~ PMI + TIN.median. + AOD + batch + SEX + PC1 + PC2
+ bbscore)

#dds_BM_salmon_final_braak_filter <- DESeq(dds_BM_salmon_braak_filter, parallel = TRUE, betaPrior
= FALSE)

#res_BM_salmon_braak_filter <- results(dds_BM_salmon_final_braak_filter, alpha = 0.05)
#summary(res_BM_salmon_braak_filter)

##DE based on PlaqueMean ##

#####
## Filtering QC ##
## via: https://support.bioconductor.org/p/65256/ ##
## triplicate by lowest number: https://support.bioconductor.org/p/49710/ ##
#####

#dds_BM_salmon_PlaqueMean_filter <- DESeqDataSetFromTximport(txi_BM, colData =
coldata_salmon_BM, design = ~ 1)

```

```

#dds_BM_salmon_PlaqueMean_filter <<- estimateSizeFactors(dds_BM_salmon_PlaqueMean_filter)

#dds_BM_salmon_PlaqueMean_filter <<- dds_BM_salmon_PlaqueMean_filter[
,!is.na(dds_BM_salmon_PlaqueMean_filter$batch)]

#dds_BM_salmon_PlaqueMean_filter <<- dds_BM_salmon_PlaqueMean_filter[
,!is.na(dds_BM_salmon_PlaqueMean_filter$PC1)]
#dds_BM_salmon_PlaqueMean_filter <<- dds_BM_salmon_PlaqueMean_filter[
,!is.na(dds_BM_salmon_PlaqueMean_filter$PC2)]

#dds_BM_salmon_PlaqueMean_filter <<- dds_BM_salmon_PlaqueMean_filter[
,!is.na(dds_BM_salmon_PlaqueMean_filter$bbsscore)]

#Remove dementedcontrols
#dds_BM_salmon_PlaqueMean_filter <<- dds_BM_salmon_PlaqueMean_filter[,
!(dds_BM_salmon_PlaqueMean_filter$DementedControl == 1)]

#dds_BM_salmon_PlaqueMean_filter$batch <<- droplevels(dds_BM_salmon_PlaqueMean_filter$batch)

#design(dds_BM_salmon_PlaqueMean_filter) = formula( ~ PMI + TIN.median. + AOD + batch + SEX + PC1
+ PC2 + bbsscore)

#dds_BM_salmon_final_PlaqueMean_filter <<- DESeq(dds_BM_salmon_PlaqueMean_filter, parallel =
TRUE, betaPrior = FALSE)

#res_BM_salmon_PlaqueMean_filter <<- results(dds_BM_salmon_final_PlaqueMean_filter, alpha =
0.05)
#summary(res_BM_salmon_PlaqueMean_filter)

#####
#####
## VSD normalization ##
#####
#####

##For Condition

#vsd_BM_salmon_condition_circ <<-
varianceStabilizingTransformation(dds_BM_salmon_condition_filter, blind = FALSE)
#norm_BM_salmon_condition_counts <<- as.data.frame(assay(vsd_BM_salmon_condition_circ))

```

```

##For CDR

vsd_BM_salmon_CDR_circ <- varianceStabilizingTransformation(dds_BM_salmon_CDR_filter, blind =
FALSE)
norm_BM_salmon_CDR_counts <- as.data.frame(assay(vsd_BM_salmon_CDR_circ))

##For braak

#vsd_BM_salmon_braak_circ <- varianceStabilizingTransformation(dds_BM_salmon_braak_filter, blind
= FALSE)
#norm_BM_salmon_braak_counts <- as.data.frame(assay(vsd_BM_salmon_braak_circ))

##For PlaqueMean

#vsd_BM_salmon_PlaqueMean_circ <-
varianceStabilizingTransformation(dds_BM_salmon_PlaqueMean_filter, blind = FALSE)
#norm_BM_salmon_PlaqueMean_counts <- as.data.frame(assay(vsd_BM_salmon_PlaqueMean_circ))

#####
#####
## Regressing Out Cofactors ##
#####
#####

###Regress out cofactors from counts for PlaqueMean

#mmage_BM_salmon_PlaqueMean=model.matrix(~-
1+dds_BM_salmon_PlaqueMean_filter$TIN.median.+dds_BM_salmon_PlaqueMean_filter$AOD+dds_B
M_salmon_PlaqueMean_filter$SEX+dds_BM_salmon_PlaqueMean_filter$PMI+dds_BM_salmon_Plaque
Mean_filter$PC1+dds_BM_salmon_PlaqueMean_filter$PC2+dds_BM_salmon_PlaqueMean_filter$batch
)
#norm_BM_salmon_PlaqueMean_counts_regress=as.data.frame(t(apply(t(norm_BM_salmon_PlaqueM
ean_counts),2,function(x){residuals(lm(x~mmage_BM_salmon_PlaqueMean))})))

###Regress out cofactors from counts for CDR

```

```

mmage_BM_salmon_CDR <- model.matrix(~-
1+dds_BM_salmon_CDR_filter$TIN.median.+dds_BM_salmon_CDR_filter$AOD+dds_BM_salmon_CDR_f
ilter$SEX+dds_BM_salmon_CDR_filter$PMI+dds_BM_salmon_CDR_filter$PC1+dds_BM_salmon_CDR_fil
ter$PC2+dds_BM_salmon_CDR_filter$batch)
norm_BM_salmon_CDR_counts_regress <-
as.data.frame(t(apply(t(norm_BM_salmon_CDR_counts),2,function(x){residuals(lm(x~mmage_BM_salm
on_CDR))})))

```

```

###Regress out cofactors from counts for braak

```

```

#mmage_BM_salmon_braak=model.matrix(~-
1+dds_BM_salmon_braak_filter$TIN.median.+dds_BM_salmon_braak_filter$AOD+dds_BM_salmon_bra
ak_filter$SEX+dds_BM_salmon_braak_filter$PMI+dds_BM_salmon_braak_filter$PC1+dds_BM_salmon_
braak_filter$PC2+dds_BM_salmon_braak_filter$batch)
#norm_BM_salmon_braak_counts_regress=as.data.frame(t(apply(t(norm_BM_salmon_braak_counts),2
,function(x){residuals(lm(x~mmage_BM_salmon_braak))})))

```

```

##Output files for MEGENA analysis

```

```

system("mkdir -p /home/dubeu/Synapse/NetworkAnalysis/BM")

```

```

write.table(norm_BM_salmon_CDR_counts_regress,
"/home/dubeu/Synapse/NetworkAnalysis/BM/norm_BM_salmon_CDR_counts_regress.txt", sep = "\t",
quote=F)

```

```

write.table(norm_BM_CDR_counts_regress,
"/home/dubeu/Synapse/NetworkAnalysis/BM/norm_BM_CDR_counts_regress.txt", sep = "\t", quote=F)

```

```

coldata_BM_MEs <- as.data.frame(colData(dds_BM_CDR_filter))
save(coldata_BM_MEs,file="/home/dubeu/Synapse/NetworkAnalysis/BM/coldata_BM.Rda")

```

```

###

```

```

#Only include protein coding genes and perform correlation with spearman

```

```

#make directory structure on CHPC

```

```

system('ssh dubeu@login.chpc.wustl.edu "mkdir -p
/scratch/dubeu/Synapse/NetworkAnalysis/BM/top10kspearman"')

```

```

#prepare batch script for 10k

```

```

system("cat /home/dubeu/Synapse/NetworkAnalysis/Dev/top10kspearman.batch | sed 's/AREA/BM/g'
> /home/dubeu/Synapse/NetworkAnalysis/BM/BM_top10kspearman.batch")

```



```

#prepare R script for 10k
system("cat /home/dubeu/Synapse/NetworkAnalysis/Dev/top10kspearman.R | sed 's/AREA/BM/g' >
/home/dubeu/Synapse/NetworkAnalysis/BM/BM_top10kspearman.R")

#Upload files

#counts
system("scp -r /home/dubeu/Synapse/NetworkAnalysis/BM/norm_BM_CDR_counts_regress.txt
dubeu@dt01.chpc.wustl.edu:/scratch/dubeu/Synapse/NetworkAnalysis/BM")
system("scp -r
/home/dubeu/Synapse/NetworkAnalysis/BM/norm_BM_salmon_CDR_counts_regress.txt
dubeu@dt01.chpc.wustl.edu:/scratch/dubeu/Synapse/NetworkAnalysis/BM")

#top10k
system("scp -r /home/dubeu/Synapse/NetworkAnalysis/BM/BM_top10kspearman.R
dubeu@dt01.chpc.wustl.edu:/scratch/dubeu/Synapse/NetworkAnalysis/BM/top10kspearman")
system("scp -r /home/dubeu/Synapse/NetworkAnalysis/BM/BM_top10kspearman.batch
dubeu@dt01.chpc.wustl.edu:/scratch/dubeu/Synapse/NetworkAnalysis/BM/top10kspearman")

#protein coding list
system("scp -r /40/AD/Expression/KnightADRCParietal/06.-
References/gencode.v26_transcriptID_to_geneID_final_proteincoding_uniqlist
dubeu@dt01.chpc.wustl.edu:/scratch/dubeu/Synapse/NetworkAnalysis/")

##Send qsub command top10k
system('ssh dubeu@login.chpc.wustl.edu "qsub
/scratch/dubeu/Synapse/NetworkAnalysis/BM/top10kspearman/BM_top10kspearman.batch"')

}

##BM10
MEGENA_complete_BM10 <- gsub("BM","BM10",as.list(body(MEGENA_complete)))
#Replace first line to create function
MEGENA_complete_BM10[1] <- "MEGENA_complete_BM10 <- function() {"
#Replace first line to end function
MEGENA_complete_BM10[length(MEGENA_complete_BM10)+1] <- "}"
write(MEGENA_complete_BM10, "/home/dubeu/Synapse/MEGENA_complete_BM10.R")

##BM22
MEGENA_complete_BM22 <- gsub("BM","BM22",as.list(body(MEGENA_complete)))
#Replace first line to create function
MEGENA_complete_BM22[1] <- "MEGENA_complete_BM22 <- function() {"

```

```

#Replace first line to end function
MEGENA_complete_BM22[length(MEGENA_complete_BM22)+1] <- ""
write(MEGENA_complete_BM22, "/home/dubeu/Synapse/MEGENA_complete_BM22.R")

##BM36
MEGENA_complete_BM36 <- gsub("BM", "BM36", as.list(body(MEGENA_complete)))
#Replace first line to create function
MEGENA_complete_BM36[1] <- "MEGENA_complete_BM36 <- function() {"
#Replace first line to end function
MEGENA_complete_BM36[length(MEGENA_complete_BM36)+1] <- ""
write(MEGENA_complete_BM36, "/home/dubeu/Synapse/MEGENA_complete_BM36.R")

##BM44
MEGENA_complete_BM44 <- gsub("BM", "BM44", as.list(body(MEGENA_complete)))
#Replace first line to create function
MEGENA_complete_BM44[1] <- "MEGENA_complete_BM44 <- function() {"
#Replace first line to end function
MEGENA_complete_BM44[length(MEGENA_complete_BM44)+1] <- ""
write(MEGENA_complete_BM44, "/home/dubeu/Synapse/MEGENA_complete_BM44.R")

source('/home/dubeu/Synapse/MEGENA_complete_BM10.R')
source('/home/dubeu/Synapse/MEGENA_complete_BM22.R')
source('/home/dubeu/Synapse/MEGENA_complete_BM36.R')
source('/home/dubeu/Synapse/MEGENA_complete_BM44.R')

MEGENA_complete_BM10()
MEGENA_complete_BM22()
MEGENA_complete_BM36()
MEGENA_complete_BM44()

#Download MEGENA results
#scp -r dubeu@dt01.chpc.wustl.edu:/scratch/dubeu/Synapse/NetworkAnalysis .

```

```

#####
#####
##### MEGENA Results Postprocessing AMP_AD #####
#####
#####

```

```

## cd /home/dubeu/Synapse/NetworkAnalysis/
##scp -r dubeu@dt01.chpc.wustl.edu:/scratch/dubeu/Synapse/NetworkAnalysis .

library(WGCNA)

MEGENA_PostProcessing <- function() {

setwd("/home/dubeu/Synapse/NetworkAnalysis/NetworkAnalysis/BM/top10kspearman")

load("/home/dubeu/Synapse/NetworkAnalysis/NetworkAnalysis/BM/top10kspearman/BM_top10kspea
rman.RData")

### Using WGCNA to create Module Eigengenes

#Bind out dataframe with gene and module membership information to expr dataframe

expr_ME <- as.data.frame(expr)
expr_ME$Gene <- rownames(expr)

out_ME <- merge(out, expr_ME, by = "Gene")

out_ME$Gene <- paste(out_ME$Gene, "_", out_ME$Module, sep="")

out_ME_modules <- out_ME$Module

out_ME_expr <- as.data.frame(out_ME)
rownames(out_ME_expr) <- out_ME_expr$Gene
out_ME_expr$Module <- NULL
out_ME_expr$Gene <- NULL
out_ME_expr <- t(as.matrix(out_ME_expr))

# Calculate eigengenes
MEList <- moduleEigengenes(out_ME_expr, colors = out_ME_modules)

MEs <- MEList$eigengenes
rownames(MEs) <- rownames(out_ME_expr)

##Load in phenotype data ##
#coldata_MEGENA_BM <- read.csv(file="/40/AD/Expression/Public_Datasets/AMP/Mount_Sinai_RNA-
seq/MSBB_Uniformed_Phenotype/MSBB_Pheno_05_15_2018.csv", header=TRUE, na.strings = "NA")
#coldata_MEGENA_BM <- subset(coldata_MEGENA_BM, BrodmannArea=="BM")

```

```

##Set factor levels

#coldata_MEGENA_BM$NP.1 <- factor(coldata_MEGENA_BM$NP.1, levels=c('1','2','3','4'))
#coldata_MEGENA_BM$Apo1 <- factor(coldata_MEGENA_BM$Apo1, levels=c('0','2','3','4'))
#coldata_MEGENA_BM$Apo2 <- factor(coldata_MEGENA_BM$Apo2, levels=c('0','2','3','4'))
#coldata_MEGENA_BM$RACE <- factor(coldata_MEGENA_BM$RACE, levels=c('A','B','H','W','U'))
#coldata_MEGENA_BM$RACE <- relevel(coldata_MEGENA_BM$RACE, "W")
#coldata_MEGENA_BM$SEX <- factor(coldata_MEGENA_BM$SEX, levels = c("M","F"))
#coldata_MEGENA_BM$batch <- factor(coldata_MEGENA_BM$batch, levels =
levels(coldata_MEGENA_BM$batch))

#rownames(coldata_MEGENA_BM) <- coldata_MEGENA_BM$sampleIdentifier

coldata_MEGENA_BM <- coldata_BM
rownames(coldata_MEGENA_BM) <- coldata_MEGENA_BM$sampleIdentifier

#### CDR
#Merge into coldata

coldata_MEGENA_BM_MEs <- merge(coldata_MEGENA_BM, MEs, by=0)

modules <- as.list(colnames(MEs))

my_lms <- lapply(modules, function(x) lm(as.formula(paste0("CDR ~ TIN.median. + PMI + PC1 + PC2 +
AOD + SEX + batch + ",x)), data=coldata_MEGENA_BM_MEs))

#coef <- lapply(my_lms, function(x) summary(x)$coefficients[,4] )

#Just pvalues
coef <- lapply(my_lms, function(x) summary(x)$coefficients[(nrow(summary(x)$coefficients)),4] )

coef_df <- as.data.frame(unlist(coef))
modules_df <- as.data.frame(unlist(modules))

module_pvalue <- cbind(modules_df, coef_df)

colnames(module_pvalue) <- c("Module", "pvalue")

module_pvalue$Module <- gsub("ME", "", module_pvalue$Module)

module_pvalue$padj <- p.adjust(module_pvalue$pvalue, method = "BH")

gene_module_pval <- merge(out, module_pvalue, by = "Module")

```

```

gene_module_pval_sigonly <- subset(gene_module_pval, padj < 0.05)

#Number of modules
length(unique(gene_module_pval$Module))

#Number of significant modules
length(unique(gene_module_pval_sigonly$Module))

#Number of significant modules with at least one circRNA
length(unique(gene_module_pval_sigonly[grepl("circ", gene_module_pval_sigonly$Gene),]$Module))

gene_module_pval_sigonly_linearonly <- gene_module_pval_sigonly[!grepl("circ",
gene_module_pval_sigonly$Gene),]

##Loop to produce module file list for FUMA analysis

modulelist <- unique(gene_module_pval_sigonly$Module)
main.dir = getwd()

dir.create(file.path(main.dir, "modules_lineargenes"), showWarnings = FALSE)

setwd(file.path(main.dir, "modules_lineargenes"))

for (module in modulelist) {

linearlist <- gene_module_pval_sigonly_linearonly[grepl((paste0("^",module,"$")),
gene_module_pval_sigonly_linearonly$Module),]$Gene

write.table(linearlist, file=module, sep= "\t", quote=F, row.names=F, col.names=F)

}

setwd(main.dir)

write.table(module_pvalue, file = "module_pval_CDR", sep = "\t", quote=F, row.names=FALSE)

#See which circRNAs are significant in meta analysis

MEGENA_BMCDR <-
read.table("/home/dubeu/Synapse/NetworkAnalysis/NetworkAnalysis/BM/top10kspearman/multiscale
_significant.modules.reformat.txt" , header=TRUE)

```

```

MEGENA_BMCDR_ME <<-
read.table("/home/dubeu/Synapse/NetworkAnalysis/NetworkAnalysis/BM/top10kspearman/module_p
val_CDR", header = TRUE)
colnames(MEGENA_BMCDR_ME) <<- c("Module","ModulePval")
MEGENA_BMCDR_ME$Module <<- gsub("ME","", MEGENA_BMCDR_ME$Module)

META_MEGENA_BMCDR <<- merge(both_CDR_BM, MEGENA_BMCDR, by = "Gene")
META_MEGENA_BMCDR <<- merge(META_MEGENA_BMCDR, MEGENA_BMCDR_ME, by = "Module")

META_MEGENA_BMCDR_sigOnly <<- subset(META_MEGENA_BMCDR, i_adjpval < 0.05)

}

##BM10
MEGENA_PostProcessing_BM10 <- gsub("BM","BM10",as.list(body(MEGENA_PostProcessing)))
#Replace first line to create function
MEGENA_PostProcessing_BM10[1] <- "MEGENA_PostProcessing_BM10 <- function() {"
#Replace first line to end function
MEGENA_PostProcessing_BM10[length(MEGENA_PostProcessing_BM10)+1] <- ""
write(MEGENA_PostProcessing_BM10, "/home/dubeu/Synapse/MEGENA_PostProcessing_BM10.R")

##BM22
MEGENA_PostProcessing_BM22 <- gsub("BM","BM22",as.list(body(MEGENA_PostProcessing)))
#Replace first line to create function
MEGENA_PostProcessing_BM22[1] <- "MEGENA_PostProcessing_BM22 <- function() {"
#Replace first line to end function
MEGENA_PostProcessing_BM22[length(MEGENA_PostProcessing_BM22)+1] <- ""
write(MEGENA_PostProcessing_BM22, "/home/dubeu/Synapse/MEGENA_PostProcessing_BM22.R")

##BM36
MEGENA_PostProcessing_BM36 <- gsub("BM","BM36",as.list(body(MEGENA_PostProcessing)))
#Replace first line to create function
MEGENA_PostProcessing_BM36[1] <- "MEGENA_PostProcessing_BM36 <- function() {"
#Replace first line to end function
MEGENA_PostProcessing_BM36[length(MEGENA_PostProcessing_BM36)+1] <- ""
write(MEGENA_PostProcessing_BM36, "/home/dubeu/Synapse/MEGENA_PostProcessing_BM36.R")

##BM44
MEGENA_PostProcessing_BM44 <- gsub("BM","BM44",as.list(body(MEGENA_PostProcessing)))
#Replace first line to create function
MEGENA_PostProcessing_BM44[1] <- "MEGENA_PostProcessing_BM44 <- function() {"
#Replace first line to end function
MEGENA_PostProcessing_BM44[length(MEGENA_PostProcessing_BM44)+1] <- ""

```

```
write(MEGENA_PostProcessing_BM44, "/home/dubeu/Synapse/MEGENA_PostProcessing_BM44.R")
```

```
source('/home/dubeu/Synapse/MEGENA_PostProcessing_BM10.R')  
source('/home/dubeu/Synapse/MEGENA_PostProcessing_BM22.R')  
source('/home/dubeu/Synapse/MEGENA_PostProcessing_BM36.R')  
source('/home/dubeu/Synapse/MEGENA_PostProcessing_BM44.R')
```

```
MEGENA_PostProcessing_BM10()  
MEGENA_PostProcessing_BM22()  
MEGENA_PostProcessing_BM36()  
MEGENA_PostProcessing_BM44()
```

```
#####  
#####  
##### MEGENA Results EigenGene Plot #####  
#####  
#####
```

```
##Generate plot based on eigengene
```

```
library(ggpubr)
```

```
ME_BM44_condition <- function(module, y_space=20){  
  coldata_BM44_MEs_forplot <- coldata_MEGENA_BM44_MEs[,c("CDR", "NP.1", "bbscore", module)]  
  colnames(coldata_BM44_MEs_forplot) <- c("CDR", "NP.1", "bbscore", "ME")  
  coldata_BM44_MEs_forplot$CDR <- as.factor(coldata_BM44_MEs_forplot$CDR)  
  coldata_BM44_MEs_forplot$bbscore <- as.factor(coldata_BM44_MEs_forplot$bbscore)  
  coldata_BM44_MEs_forplot <- subset(coldata_BM44_MEs_forplot, as.numeric(NP.1) <= 2)  
  coldata_BM44_MEs_forplot$condition <- "Control"  
  coldata_BM44_MEs_forplot[as.numeric(coldata_BM44_MEs_forplot$NP.1)==2,]$condition <- "AD"  
  p <- ggplot(coldata_BM44_MEs_forplot, aes(condition, ME)) + geom_boxplot(aes(colour = condition),  
    show.legend=F) + ggtitle("Module Enrichment") + labs(y = "A.U.", x = "") + theme_light() +  
    stat_compare_means(comparisons=list(c("Control", "AD")),label="p.signif") + theme(plot.title =  
    element_text(hjust = 0.5, size=27),axis.text=element_text(size=25, face="bold")) +  
    scale_color_manual(values=c("blue", "black"))  
  #via: https://stackoverflow.com/questions/48550525/ggpubr-change-font-size-of-stat-compare-means-kruskal-wallis-p-values  
  p$layers[[2]]$aes_params$textsize <- 20  
  p$layers[[2]]$aes_params$vjust <- 0.7
```

```
p
}
```

```
#####
#####
##### MEGENA Results parietal #####
#####
#####
```

```
setwd("/home/dubeu/Synapse/NetworkAnalysis/NetworkAnalysis/parietal/top10kspearman")
```

```
load("/home/dubeu/Synapse/NetworkAnalysis/NetworkAnalysis/parietal/top10kspearman/parietal_top10kspearman.RData")
```

```
##Post MEGENA processing code, after load MEGENA run RData file
library(WGCNA)
```

```
### Using WGCNA to create Module Eigengenes
```

```
#Bind out dataframe with gene and module membership information to expr dataframe
```

```
expr_ME <- as.data.frame(expr)
expr_ME$Gene <- rownames(expr)
```

```
out_ME <- merge(out, expr_ME, by = "Gene")
```

```
out_ME$Gene <- paste(out_ME$Gene, "_", out_ME$Module, sep="")
```

```
out_ME_modules <- out_ME$Module
```

```
out_ME_expr <- as.data.frame(out_ME)
rownames(out_ME_expr) <- out_ME_expr$Gene
out_ME_expr$Module <- NULL
out_ME_expr$Gene <- NULL
out_ME_expr <- t(as.matrix(out_ME_expr))
```

```
# Calculate eigengenes
```

```
MEList = moduleEigengenes(out_ME_expr, colors = out_ME_modules)
```

```
MEs = MEList$eigengenes
```

```
rownames(MEs) <- rownames(out_ME_expr)
```



```

##load Parietal phenotype / covariate information
coldata_MEGENA_parietal <- read.csv(file="/40/AD/Expression/KnightADRCParietal/03.-
phenotype/Pheno", header=TRUE, na.strings = "NA")
#Restrict analyses to parietal tissues
coldata_MEGENA_parietal <- subset(coldata_MEGENA_parietal, brain_region == "parietal")

#Rename
coldata_MEGENA_parietal$ID_RNAseq <- gsub("VY-", "VY.", coldata_MEGENA_parietal$ID_RNAseq)

#Temporarily Assigning Ethnicity#
coldata_MEGENA_parietal$Ethnicity <- coldata_MEGENA_parietal$Ethnicity_temp

##Remove Consensus Outliers
coldata_MEGENA_parietal <- subset(coldata_MEGENA_parietal, ConsensusOutlier_RemoveBefore != 1)

#Set rownames
rownames(coldata_MEGENA_parietal) <- coldata_MEGENA_parietal$ID_RNAseq

cts_parietal <- cts_parietal[, rownames(coldata_MEGENA_parietal)]

#Set up factor levels
coldata_MEGENA_parietal$pool <- factor(coldata_MEGENA_parietal$pool, levels=c('1','2'))
coldata_MEGENA_parietal$GENDER <- factor(coldata_MEGENA_parietal$GENDER, levels=c('1','2'))
coldata_MEGENA_parietal$Ethnicity <- factor(coldata_MEGENA_parietal$Ethnicity, levels = c("EA",
"AA"))
coldata_MEGENA_parietal$condition <- droplevels(coldata_MEGENA_parietal$condition)

rownames(coldata_MEGENA_parietal) <- coldata_MEGENA_parietal$ID_RNAseq

#### CDR
#Merge into coldata

coldata_MEGENA_parietal_MEs <- merge(coldata_MEGENA_parietal, MEs, by=0)

modules <- as.list(colnames(MEs))

my_lms <- lapply(modules, function(x) lm(as.formula(paste0("CDR_e ~ TIN.median. + PMI + PC1 + PC2 +
AGE_at_death + GENDER + pool + ",x)), data=coldata_MEGENA_parietal_MEs))

coef <- lapply(my_lms, function(x) summary(x)$coefficients[,4] )

```

```

#Just pvalues
coef <- lapply(my_lms, function(x) summary(x)$coefficients[(nrow(summary(x)$coefficients)),4] )

coef_df <- as.data.frame(unlist(coef))
modules_df <- as.data.frame(unlist(modules))

module_pvalue <- cbind(modules_df, coef_df)

colnames(module_pvalue) <- c("Module", "pvalue")

module_pvalue$Module <- gsub("ME", "", module_pvalue$Module)

module_pvalue$padj <- p.adjust(module_pvalue$pvalue, method = "BH")

gene_module_pval <- merge(out, module_pvalue, by = "Module")

gene_module_pval_sigonly <- subset(gene_module_pval, padj < 0.05)

#Number of modules
length(unique(gene_module_pval$Module))

#Number of significant modules
length(unique(gene_module_pval_sigonly$Module))

#Number of significant modules with at least one circRNA
length(unique(gene_module_pval_sigonly[grepl("circ", gene_module_pval_sigonly$Gene),]$Module))

gene_module_pval_sigonly_linearonly <- gene_module_pval_sigonly[!grepl("circ",
gene_module_pval_sigonly$Gene),]

##Loop to produce module file list for FUMA analysis

modulelist <- unique(gene_module_pval_sigonly$Module)
main.dir = getwd()

dir.create(file.path(main.dir, "modules_lineargenes"), showWarnings = FALSE)

setwd(file.path(main.dir, "modules_lineargenes"))

for (module in modulelist) {

linearlist <- gene_module_pval_sigonly_linearonly[grepl((paste0("^",module,"$")),
gene_module_pval_sigonly_linearonly$Module),]$Gene

```

```

write.table(linearlist, file=module, sep= "\t", quote=F, row.names=F, col.names=F)

}

setwd(main.dir)

write.table(module_pvalue, file = "module_pval_CDR", sep = "\t", quote=F, row.names=FALSE)

#See which circRNAs are significant in meta analysis

MEGENA_parietalCDR <-
read.table("/home/dubeu/Synapse/NetworkAnalysis/NetworkAnalysis/parietal/top10kspearman/multiscale_significant.modules.reformat.txt" , header=TRUE)

MEGENA_parietalCDR_ME <-
read.table("/home/dubeu/Synapse/NetworkAnalysis/NetworkAnalysis/parietal/top10kspearman/module_pval_CDR", header = TRUE)
colnames(MEGENA_parietalCDR_ME) <- c("Module","ModulePval")
MEGENA_parietalCDR_ME$Module <- gsub("ME","", MEGENA_parietalCDR_ME$Module)

META_MEGENA_parietalCDR <- merge(both_CDR_BM44, MEGENA_parietalCDR, by = "Gene")
META_MEGENA_parietalCDR <- merge(META_MEGENA_parietalCDR, MEGENA_parietalCDR_ME, by = "Module")

META_MEGENA_parietalCDR_sigOnly <- subset(META_MEGENA_parietalCDR, i_adjpval < 0.05)

...

```

## Template files

R Script

```
library("MEGENA")
```

```
expr_circ <-
as.matrix(read.table("/scratch/dubeu/Synapse/NetworkAnalysis/AREA/norm_AREA_CDR_counts_regression.txt", header=TRUE))
```

```
expr_linear <-
as.matrix(read.table("/scratch/dubeu/Synapse/NetworkAnalysis/AREA/norm_AREA_salmon_CDR_counts_regression.txt", header=TRUE))
```

```

ProteinCoding <-
(read.table("/scratch/dubeu/Synapse/NetworkAnalysis/gencode.v26_transcriptID_to_geneID_final_prot
eincoding_uniqlist", header=FALSE))

expr_linear <- expr_linear[intersect(rownames(expr_linear), as.character(ProteinCoding[,1])),]

max.genes=10000
if(nrow(expr_linear) >= max.genes) expr_linear=expr_linear[rank(-apply(expr_linear,1,var,na.rm=TRUE))
<= max.genes,]

##No max gene filter
#expr=expr[rank(-apply(expr,1,var,na.rm=TRUE)),]

expr <- rbind(expr_circ, expr_linear)

setwd("/scratch/dubeu/Synapse/NetworkAnalysis/AREA/top10kspearman")

n.cor.perm=10
FDR.cutoff = 0.05
n.cores=4
max.module.size=NULL
min.module.size = 10
n.hub.perm=100
module.pval = 0.05
hub.pval = 0.05
doPar = TRUE
remove.unsig = TRUE
#

#### register multiple cores if needed: note that set.parallel.backend() is deprecated.
if (doPar & getDoParWorkers() == 1)
{
  cl <- parallel::makeCluster(n.cores)
  registerDoParallel(cl)
  # check how many workers are there
  cat(paste("number of cores to use:",getDoParWorkers(),"\n",sep = ""))
}

# calculate correlation
ijw <- calculate.correlation(datExpr = expr, doPerm = n.cor.perm, method = 'spearman', FDR.cutoff =
FDR.cutoff,output.permFDR=FALSE,output.corTable=FALSE,num.cores=n.cores)

```

```

ijw=ijw[,1:3]
ijw[,3]=abs(ijw[,3])
ijw=ijw[order(ijw[,3],decreasing=TRUE),]

# calculate PFN
el <- calculate.PFN(ijw, doPar = doPar, num.cores = n.cores)

g <- graph.data.frame(el,directed = FALSE)

if(is.null(max.module.size)) max.module.size = min(5000,ceiling(vcount(g)/3))

MEGENA.output <- do.MEGENA(g, mod.pval = module.pval, hub.pval = hub.pval, remove.unsig = TRUE,
min.size = 10, max.size = max.module.size, doPar = doPar, num.cores = n.cores, n.perm = n.hub.perm,
save.output = FALSE)

##### unregister cores as these are not needed anymore.
if (getDoParWorkers() > 1)
{
  env <- foreach::foreachGlobals
  rm(list=ls(name=env), pos=env)
}

summary.output <- MEGENA.ModuleSummary(MEGENA.output,
mod.pvalue = module.pval, hub.pvalue = hub.pval,
min.size = 10,max.size = max.module.size,
output.sig = TRUE)

geneSetf="multiscale_significant.modules.txt"

geneSetf="multiscale_significant.modules.txt"
output.geneSet.file(summary.output$modules,geneSetf)
#reformat
geneSet=readLines(geneSetf)
out=do.call(rbind,lapply(geneSet,function(x) {a=strsplit(x,`\t')[[1]];data.frame(Gene=a[-
1],Module=a[1],stringsAsFactors=FALSE)}))
write.table(out,file='multiscale_significant.modules.reformat.txt',row.names=FALSE,col.names=TRUE,se
p='\t',quote=FALSE)

save.image("AREA_top10kspearman.RData")

```

```

Bash Script
#!/bin/bash

```

```

# Script to submit the file

type qsub

qsub /scratch/dubeu/Synapse/NetworkAnalysis/AREA/top10kspearman/AREA_top10kspearman.batch

Cluster Processing Script
#!/bin/bash

# Give the job a name to help keep track of running jobs (optional)
#PBS -N AREA_top10kspearman

# Specify the resources needed
#PBS -l nodes=1:ppn=4,walltime=24:00:00

#Command to Run
#qsub /scratch/dubeu/Synapse/NetworkAnalysis/AREA/top10kspearman/AREA_top10kspearman.batch

cd /scratch/dubeu/Synapse/NetworkAnalysis/AREA/top10kspearman

# Load the environmental variables necessary for running R
module load R-3.4.2

# Finally run the R benchmark with the command
Rscript AREA_top10kspearman.R

#Download files at the end
#scp -r
dubeu@dt01.chpc.wustl.edu:/scratch/dubeu/Synapse/NetworkAnalysis/AREA/top10kspearman/home/dubeu/Synapse/NetworkAnalysis/AREA/
MicroRNA Binding Site Prediction Analyses
#####
## Dube et al., 2019 - circRNAs in AD ##
#####

##Author: Umber Dube
##Contact: udube@wustl.edu

##Code Section: MicroRNA Binding Site Prediction

#####Get the TargetScan70 software
``{bash}

```

```

wget http://www.targetscan.org/vert_70/vert_70_data_download/targetscan_70.zip
wget http://www.targetscan.org/vert_70/vert_70_data_download/miR_Family_Info.txt.zip

#Convert miRNA file as per readme
sed '1,1d' /home/dubeu/Synapse/miR_Family_info.txt | cut -f1,2,3 | sort -u > miR_Family_info_all.txt

...

#####Get circRNA sequences and Process for TargetScan
``{bash}

##Download the extract script from DCC
wget https://raw.githubusercontent.com/dieterich-lab/DCC/master/scripts/getcircfasta
mv getcircfasta getcircfasta.py

##Remove the header
tail -n+2 <(sed 's/Chr/Chr\tChr/g' /home/dubeu/Synapse/circCoordinates_parietal | cut -f2-9) >
circs.bed

cat /40/AD/Expression/KnightADRCParietal/06.-
References/gencode.v26.primary_assembly.annotation.gtf | awk 'OFS="\t" {if ($3=="exon") {print $1,$4-
1,$5,$10"_exon_"$22,$16,$7}}' | tr -d ";" > /40/AD/Expression/KnightADRCParietal/06.-
References/gencode.v26.primary_assembly.annotation_exons.bed

##Run the script

python getcircfasta.py -f /40/AD/Expression/KnightADRCParietal/06.-
References/GRCh38.primary_assembly.genome.fa -c circs.bed -e
/40/AD/Expression/KnightADRCParietal/06.-
References/gencode.v26.primary_assembly.annotation_exons.bed -o circCoordinates_parietal_hg38.fa

##Process the fasta file for TargetScan analysis

awk 'NR%2{printf "%s ",$0;next;}1' /home/dubeu/Synapse/circCoordinates_parietal_hg38.fa |
spaces_to_one_tab.sh | awk '{print $4":"$1":"$2-"$3,"9606", $9}' | sed 's/>/g' | awk
'BEGIN{OFS="\t";} {gsub("T","U",$3);print}' > circCoordinates_parietal_hg38

...

#####Run TargetScan Analysis
``{bash}

```

```
/home/dubeu/Synapse/microRNA_analysis/targetscan_70/targetscan_70.pl  
/home/dubeu/Synapse/microRNA_analysis/miR_Family_info_all.txt circCoordinates_parietal_hg38  
circCoordinates_parietal_hg38_prediction
```

```
##Create a list of genes
```

```
cut -d: -f1 circCoordinates_parietal_hg38 | sort -u > genelists
```

```
ProcessScript.sh
```

```
#!/bin/bash
```

```
grep -w $1 circCoordinates_parietal_hg38 > circCoordinates_parietal_hg38_$1
```

```
/home/dubeu/Synapse/microRNA_analysis/targetscan_70/targetscan_70.pl  
/home/dubeu/Synapse/microRNA_analysis/miR_Family_info_all.txt circCoordinates_parietal_hg38_$1  
targetscan_70_circCoordinates_parietal_hg38_$1.txt
```

```
rm circCoordinates_parietal_hg38_$1
```

```
exit
```

```
parallel -j 50 --load 50 -a genelists ./ProcessScript.sh
```

```
...
```

```
###Processing output in R
```

```
``{bash}
```

```
## miRNA Processing
```

```
##Read into R following the processing
```

```
require(data.table)
```

```
PredictedmiRNAs <-
```

```
fread("/home/dubeu/Synapse/microRNA_analysis/circCoordinates_parietal_hg38_prediction",  
header=TRUE)
```

```
require(dplyr)
```

```
PredictedmiRNAs <- PredictedmiRNAs %>% group_by(a_Gene_ID, miRNA_family_ID) %>% mutate(count  
= n())
```



```

PredictedmiRNAs <- unique(PredictedmiRNAs[,c("a_Gene_ID", "miRNA_family_ID", "count")])
PredictedmiRNAs$gene <- paste0("circ",gsub("::.*.*", "", PredictedmiRNAs$a_Gene_ID))

PredictedmiRNAs_sigList_BM44_CDR <- PredictedmiRNAs[(PredictedmiRNAs$gene %in%
sigList_BM44_CDR),]

##Collapse to the gene level and choose the greatest number
PredictedmiRNAs_sigList_BM44_CDR <-
PredictedmiRNAs_sigList_BM44_CDR[,c("gene", "miRNA_family_ID", "count")]

PredictedmiRNAs_sigList_BM44_CDR <- PredictedmiRNAs_sigList_BM44_CDR %>% group_by(gene,
miRNA_family_ID) %>% mutate(max = max(count))

PredictedmiRNAs_sigList_BM44_CDR <-
unique(PredictedmiRNAs_sigList_BM44_CDR[,c("gene", "miRNA_family_ID", "max")])

colnames(PredictedmiRNAs_sigList_BM44_CDR) <- c("gene", "miRNA_family_ID", "count")

##Summary table per gene

PredictedmiRNAs_sigList_BM44_CDR_summary <-
unique(PredictedmiRNAs_sigList_BM44_CDR[,c("miRNA_family_ID", "count", "gene")])

PredictedmiRNAs_sigList_BM44_CDR_summary <- PredictedmiRNAs_sigList_BM44_CDR_summary %>%
group_by(gene) %>% mutate(Total = n(), Min = min(count), Max = max(count), Total1 =
length(gene[count > 1]))

PredictedmiRNAs_sigList_BM44_CDR_summary <-
unique(PredictedmiRNAs_sigList_BM44_CDR_summary[,c("gene", "Total", "Total1", "Min", "Max")])

...

```

## Overlap and other calculations

```

#####
## Dube et al., 2019 - circRNAs in AD ##
#####

```

```

##Author: Umber Dube
##Contact: udube@wustl.edu

```

```

##Code Section: Overlap Calculations and Numbers for Paper
``{r}

```

```

#####
#####
## Calculate Parietal Overlap ##
#####
#####

GeneList_parietal_condition <- rownames(subset(res_parietal_condition_filter, padj < 0.05))

GeneList_parietal_CDR <- rownames(subset(res_parietal_CDR_filter, padj < 0.05))

GeneList_parietal_braak <- rownames(subset(res_parietal_braak_filter, padj < 0.05))

grid.newpage()
draw.triple.venn(area1 = length(GeneList_parietal_condition), area2 = length(GeneList_parietal_CDR),
area3 = length(GeneList_parietal_braak), n12 = length(intersect(GeneList_parietal_condition,
GeneList_parietal_CDR)), n23 = length(intersect(GeneList_parietal_CDR, GeneList_parietal_braak)), n13
= length(intersect(GeneList_parietal_condition, GeneList_parietal_braak)),
  n123 = length(Reduce(intersect, list(GeneList_parietal_condition, GeneList_parietal_CDR,
GeneList_parietal_braak))), category = c("LOAD Case", "CDR", "Braak"), lty = "blank",
  cex = 1.5,
  fontface = "bold",
  fontfamily = "sans",
  cat.cex = 1.8,
  cat.fontface = "bold",
  cat.default.pos = "outer",
  fill = c("skyblue", "pink1", "mediumorchid"))

intersect(GeneList_parietal_condition, GeneList_parietal_CDR, GeneList_parietal_braak)

###Condition
##Aggregate / intersect list of genes
#GeneList_parietal_LOADvsCO <- unique(c(rownames(subset(res_parietal_condition_filter, padj <
0.05)), rownames(subset(res_parietal_braak_filter, padj < 0.05)),
rownames(subset(res_parietal_CDR_filter, padj < 0.05))))

GeneList_parietal_LOADvsCO <- rownames(subset(res_parietal_condition_filter, padj < 0.05))

GeneList_parietal_ADADvsCO <- rownames(subset(res_parietalADAD_condition_filter_ADADvsCO, padj
< 0.05))

```

```
GeneList_parietal_ADADvsLOAD <-  
rownames(subset(res_parietalADAD_conditionBraak_filter_ADADvsLOAD, padj < 0.05))
```

```
grid.newpage()  
pushViewport(viewport(width=unit(0.8, "npc"), height = unit(0.8, "npc")))  
draw.triple.venn(area1 = length(GeneList_parietal_LOADvsCO), area2 =  
length(GeneList_parietal_ADADvsLOAD), area3 = length(GeneList_parietal_ADADvsCO), n12 =  
length(intersect(GeneList_parietal_LOADvsCO, GeneList_parietal_ADADvsLOAD)), n23 =  
length(intersect(GeneList_parietal_ADADvsLOAD, GeneList_parietal_ADADvsCO)), n13 =  
length(intersect(GeneList_parietal_LOADvsCO, GeneList_parietal_ADADvsCO)),  
n123 = length(Reduce(intersect, list(GeneList_parietal_LOADvsCO, GeneList_parietal_ADADvsLOAD,  
GeneList_parietal_ADADvsCO))), category = c("ADvsCO", "ADADvsAD*", "ADADvsCO"), lty = "blank",  
cex = 1.5,  
fontface = "bold",  
fontfamily = "sans",  
cat.cex = 1.5,  
cat.fontface = "bold",  
cat.default.pos = "outer",  
fill = c("skyblue", "pink1", "mediumorchid"))
```

```
#####  
#####  
## Check of consistency in direction of effect ADAD and LOAD ##  
#####  
#####
```

```
GeneList_parietal_LOADvsCO <- rownames(subset(res_parietal_condition_filter, padj < 0.05))
```

```
GeneList_parietal_ADADvsCO <- rownames(subset(res_parietalADAD_condition_filter_ADADvsCO, padj  
< 0.05))
```

```
GeneList_parietal_ADADvsLOAD <-  
rownames(subset(res_parietalADAD_conditionBraak_filter_ADADvsLOAD, padj < 0.05))
```

```
OverlapADAD_CO_ADAD_LOAD <-  
cbind(res_parietalADAD_condition_filter_ADADvsCO[intersect(GeneList_parietal_ADADvsCO,  
GeneList_parietal_ADADvsLOAD),]$log2FoldChange,
```

```

res_parietalADAD_conditionBraak_filter_ADADvsLOAD[intersect(GeneList_parietal_ADADvsCO,
GeneList_parietal_ADADvsLOAD),]$log2FoldChange)
OverlapADAD_CO_ADAD_LOAD <- cbind(OverlapADAD_CO_ADAD_LOAD, samesign=
as.data.frame(sign(OverlapADAD_CO_ADAD_LOAD[,1])==sign(OverlapADAD_CO_ADAD_LOAD[,2])))
OverlapADAD_CO_ADAD_LOAD <- cbind(OverlapADAD_CO_ADAD_LOAD, increasingSeverity=
as.data.frame(abs(OverlapADAD_CO_ADAD_LOAD[,1])>abs(OverlapADAD_CO_ADAD_LOAD[,2])))

```

```

cbind(res_parietal_condition_filter[Reduce(intersect, list(GeneList_parietal_LOADvsCO,
GeneList_parietal_ADADvsLOAD, GeneList_parietal_ADADvsCO)),]$log2FoldChange,
res_parietalADAD_condition_filter_ADADvsCO[Reduce(intersect, list(GeneList_parietal_LOADvsCO,
GeneList_parietal_ADADvsLOAD, GeneList_parietal_ADADvsCO)),]$log2FoldChange,
res_parietalADAD_conditionBraak_filter_ADADvsLOAD[Reduce(intersect,
list(GeneList_parietal_LOADvsCO, GeneList_parietal_ADADvsLOAD,
GeneList_parietal_ADADvsCO)),]$log2FoldChange)

```

```

#####
#####
## Calculate overlap between ADAD and LOAD ##
#####
#####

```

```

###Condition
##Aggregate / intersect list of genes
#GeneList_parietal_LOADvsCO <- unique(c(rownames(subset(res_parietal_condition_filter, padj <
0.05)), rownames(subset(res_parietal_braak_filter, padj < 0.05)),
rownames(subset(res_parietal_CDR_filter, padj < 0.05))))

```

```

GeneList_parietal_LOADvsCO <- rownames(subset(res_parietal_condition_filter, padj < 0.05))

```

```

GeneList_parietal_ADADvsCO <- rownames(subset(res_parietalADAD_condition_filter_ADADvsCO, padj
< 0.05))

```

```

GeneList_parietal_ADADvsLOAD <-
rownames(subset(res_parietalADAD_conditionBraak_filter_ADADvsLOAD, padj < 0.05))

```

```

grid.newpage()
pushViewport(viewport(width=unit(0.8, "npc"), height = unit(0.8, "npc")))
draw.triple.venn(area1 = length(GeneList_parietal_LOADvsCO), area2 =
length(GeneList_parietal_ADADvsLOAD), area3 = length(GeneList_parietal_ADADvsCO), n12 =

```

```

length(intersect(GeneList_parietal_LOADvsCO, GeneList_parietal_ADADvsLOAD)), n23 =
length(intersect(GeneList_parietal_ADADvsLOAD, GeneList_parietal_ADADvsCO)), n13 =
length(intersect(GeneList_parietal_LOADvsCO, GeneList_parietal_ADADvsCO)),
  n123 = length(Reduce(intersect, list(GeneList_parietal_LOADvsCO, GeneList_parietal_ADADvsLOAD,
GeneList_parietal_ADADvsCO))), category = c("LOADvsCO", "ADADvsLOAD", "ADADvsCO"), lty = "blank",
  cex = 1.5,
  fontface = "bold",
  fontfamily = "sans",
  cat.cex = 1.5,
  cat.fontface = "bold",
  cat.default.pos = "outer",
  fill = c("skyblue", "pink1", "mediumorchid"))

```

```

#####
#####
## Check of consistency in direction of effect ADAD and LOAD ##
#####
#####

```

```
GeneList_parietal_LOADvsCO <- rownames(subset(res_parietal_condition_filter, padj < 0.05))
```

```
GeneList_parietal_ADADvsCO <- rownames(subset(res_parietalADAD_condition_filter_ADADvsCO, padj
< 0.05))
```

```
GeneList_parietal_ADADvsLOAD <-
rownames(subset(res_parietalADAD_conditionBraak_filter_ADADvsLOAD, padj < 0.05))
```

```
OverlapADAD_CO_ADAD_LOAD <-
cbind(res_parietalADAD_condition_filter_ADADvsCO[intersect(GeneList_parietal_ADADvsCO,
GeneList_parietal_ADADvsLOAD),]$log2FoldChange,
res_parietalADAD_conditionBraak_filter_ADADvsLOAD[intersect(GeneList_parietal_ADADvsCO,
GeneList_parietal_ADADvsLOAD),]$log2FoldChange)
OverlapADAD_CO_ADAD_LOAD <- cbind(OverlapADAD_CO_ADAD_LOAD, samesign=
as.data.frame(sign(OverlapADAD_CO_ADAD_LOAD[,1])==sign(OverlapADAD_CO_ADAD_LOAD[,2])))
OverlapADAD_CO_ADAD_LOAD <- cbind(OverlapADAD_CO_ADAD_LOAD, increasingSeverity=
as.data.frame(abs(OverlapADAD_CO_ADAD_LOAD[,1])>abs(OverlapADAD_CO_ADAD_LOAD[,2])))
```

```

cbind(res_parietal_condition_filter[Reduce(intersect, list(GeneList_parietal_LOADvsCO,
GeneList_parietal_ADADvsLOAD, GeneList_parietal_ADADvsCO)),]$log2FoldChange,
res_parietalADAD_condition_filter_ADADvsCO[Reduce(intersect, list(GeneList_parietal_LOADvsCO,
GeneList_parietal_ADADvsLOAD, GeneList_parietal_ADADvsCO)),]$log2FoldChange,
res_parietalADAD_conditionBraak_filter_ADADvsLOAD[Reduce(intersect,
list(GeneList_parietal_LOADvsCO, GeneList_parietal_ADADvsLOAD,
GeneList_parietal_ADADvsCO)),]$log2FoldChange)

```

```

#####
#####
## Calculate BM44 Overlap ##
#####
#####

```

```
GeneList_BM44_condition <- rownames(subset(res_BM44_condition_filter, padj < 0.05))
```

```
GeneList_BM44_CDR <- rownames(subset(res_BM44_CDR_filter, padj < 0.05))
```

```
GeneList_BM44_braak <- rownames(subset(res_BM44_braak_filter, padj < 0.05))
```

```
GeneList_BM44_PlaqueMean <- rownames(subset(res_BM44_PlaqueMean_filter, padj < 0.05))
```

```

grid.newpage()
draw.quad.venn(area1 = length(GeneList_BM44_condition), area2 = length(GeneList_BM44_CDR), area3
= length(GeneList_BM44_braak), area4 = length(GeneList_BM44_PlaqueMean), n12 =
length(intersect(GeneList_BM44_condition, GeneList_BM44_CDR)), n13 =
length(intersect(GeneList_BM44_condition, GeneList_BM44_braak)), n14 =
length(intersect(GeneList_BM44_condition, GeneList_BM44_PlaqueMean)), n23 =
length(intersect(GeneList_BM44_CDR, GeneList_BM44_braak)), n24 =
length(intersect(GeneList_BM44_CDR, GeneList_BM44_PlaqueMean)), n34 =
length(intersect(GeneList_BM44_braak, GeneList_BM44_PlaqueMean)),
  n123 = length(Reduce(intersect, list(GeneList_BM44_condition, GeneList_BM44_CDR,
GeneList_BM44_braak))), n124 = length(Reduce(intersect, list(GeneList_BM44_condition,
GeneList_BM44_CDR, GeneList_BM44_PlaqueMean))), n134 = length(Reduce(intersect,
list(GeneList_BM44_condition, GeneList_BM44_braak, GeneList_BM44_PlaqueMean))), n234 =
length(Reduce(intersect, list(GeneList_BM44_CDR, GeneList_BM44_braak,
GeneList_BM44_PlaqueMean))), n1234 = length(Reduce(intersect, list(GeneList_BM44_condition,
GeneList_BM44_CDR, GeneList_BM44_braak, GeneList_BM44_PlaqueMean))), category = c("LOAD
Case", "CDR", "Braak", "PlaquesMean"), lty = "blank",
  cex = 1.5,

```

```
fontface = "bold",
fontfamily = "sans",
cat.cex = 1.2,
cat.fontface = "bold",
cat.default.pos = "outer",
fill = c("skyblue", "pink1", "mediumorchid", "green"))
```

```
#####
#####
## Calculate Parietal and BM44 Overlap Overall ##
#####
#####
```

```
GeneList_BM44_ALL <- unique(c(GeneList_BM44_condition, GeneList_BM44_CDR,
GeneList_BM44_braak, GeneList_BM44_PlaqueMean))
#GeneList_BM44_ALL <- Reduce(intersect, list(GeneList_BM44_condition, GeneList_BM44_CDR,
GeneList_BM44_braak, GeneList_BM44_PlaqueMean))
```

```
GeneList_parietal_ALL <- unique(c(GeneList_parietal_condition, GeneList_parietal_CDR,
GeneList_parietal_braak))
```

```
#All
grid.newpage()
pushViewport(viewport(width=unit(0.8, "npc"), height = unit(0.8, "npc")))
draw.pairwise.venn(area1 = length(GeneList_parietal_ALL), area2 = length(GeneList_BM44_ALL),
cross.area = length(intersect(GeneList_parietal_ALL, GeneList_BM44_ALL)), category = c("Parietal \n
Discovery", "BM44 \n Replication"), lty = "blank", cex = 1.5, fontface = "bold", fontfamily = "sans",
cat.cex = 1.2, cat.fontface = "bold", cat.default.pos = "outer", fill = c("skyblue", "pink1"))
```

```
#####
#####
## Calculate Parietal and BM44 Overlap CDR ##
#####
#####
```

```
grid.newpage()
pushViewport(viewport(width=unit(0.8, "npc"), height = unit(0.8, "npc")))
draw.pairwise.venn(area1 = length(GeneList_parietal_CDR), area2 = length(GeneList_BM44_CDR),
cross.area = length(intersect(GeneList_parietal_CDR, GeneList_BM44_CDR)), category = c("Parietal \n
Discovery", "BM44 \n Replication"), lty = "blank", cex = 1.5, fontface = "bold", fontfamily = "sans",
cat.cex = 1.2, cat.fontface = "bold", cat.default.pos = "outer", fill = c("skyblue", "pink1"))
```

#Same direction of effect?

```
sum(sign(res_parietal_CDR_filter[rownames(subset(res_BM44_CDR_filter[GeneList_parietal_CDR,],
pvalue < 0.05)),]$log2FoldChange) == sign(subset(res_BM44_CDR_filter[GeneList_parietal_CDR,], pvalue
< 0.05)$log2FoldChange))
```

```
#####
#####
## Calculate Parietal and BM44 Overlap braak ##
#####
#####
```

```
grid.newpage()
pushViewport(viewport(width=unit(0.8, "npc"), height = unit(0.8, "npc")))
draw.pairwise.venn(area1 = length(GeneList_parietal_braak), area2 = length(GeneList_BM44_braak),
cross.area = length(intersect(GeneList_parietal_braak, GeneList_BM44_braak)), category = c("Parietal \n
Discovery", "BM44 \n Replication"), lty = "blank", cex = 1.5, fontface = "bold", fontfamily = "sans",
cat.cex = 1.2, cat.fontface = "bold", cat.default.pos = "outer", fill = c("skyblue", "pink1"))
```

#Same direction of effect?

```
sum(sign(res_parietal_braak_filter[rownames(subset(res_BM44_braak_filter[GeneList_parietal_braak,],
pvalue < 0.05)),]$log2FoldChange) == sign(subset(res_BM44_braak_filter[GeneList_parietal_braak,],
pvalue < 0.05)$log2FoldChange))
```

```
#####
#####
## Calculate Parietal and BM44 Overlap condition ##
#####
#####
```

```
grid.newpage()
pushViewport(viewport(width=unit(0.8, "npc"), height = unit(0.8, "npc")))
draw.pairwise.venn(area1 = length(GeneList_parietal_condition), area2 =
length(GeneList_BM44_condition), cross.area = length(intersect(GeneList_parietal_condition,
GeneList_BM44_condition)), category = c("Parietal \n Discovery", "BM44 \n Replication"), lty = "blank",
```



```
cex = 1.5, fontface = "bold", fontfamily = "sans", cat.cex = 1.2, cat.fontface = "bold", cat.default.pos = "outer", fill = c("skyblue", "pink1"))
```

```
#Same direction of effect?
```

```
sum(sign(res_parietal_condition_filter[rownames(subset(res_BM44_condition_filter[GeneList_parietal_condition,], pvalue < 0.05)),]$log2FoldChange) == sign(subset(res_BM44_condition_filter[GeneList_parietal_condition,], pvalue < 0.05)$log2FoldChange))
```

```
#####  
#####  
## Calculate overlap between PlaqueMean ##  
#####  
#####
```

```
GeneList_BM10_PlaqueMean <- rownames(subset(res_BM10_PlaqueMean_filter, padj < 0.05))
```

```
GeneList_BM22_PlaqueMean <- rownames(subset(res_BM22_PlaqueMean_filter, padj < 0.05))
```

```
GeneList_BM36_PlaqueMean <- rownames(subset(res_BM36_PlaqueMean_filter, padj < 0.05))
```

```
GeneList_BM44_PlaqueMean <- rownames(subset(res_BM44_PlaqueMean_filter, padj < 0.05))
```

```
grid.newpage()
```

```
draw.quad.venn(area1 = length(GeneList_BM10_PlaqueMean), area2 = length(GeneList_BM22_PlaqueMean), area3 = length(GeneList_BM36_PlaqueMean), area4 = length(GeneList_BM44_PlaqueMean), n12 = length(intersect(GeneList_BM10_PlaqueMean, GeneList_BM22_PlaqueMean)), n13 = length(intersect(GeneList_BM10_PlaqueMean, GeneList_BM36_PlaqueMean)), n14 = length(intersect(GeneList_BM10_PlaqueMean, GeneList_BM44_PlaqueMean)), n23 = length(intersect(GeneList_BM22_PlaqueMean, GeneList_BM36_PlaqueMean)), n24 = length(intersect(GeneList_BM22_PlaqueMean, GeneList_BM44_PlaqueMean)), n34 = length(intersect(GeneList_BM36_PlaqueMean, GeneList_BM44_PlaqueMean)), n123 = length(Reduce(intersect, list(GeneList_BM10_PlaqueMean, GeneList_BM22_PlaqueMean, GeneList_BM36_PlaqueMean))), n124 = length(Reduce(intersect, list(GeneList_BM10_PlaqueMean, GeneList_BM22_PlaqueMean, GeneList_BM44_PlaqueMean))), n134 = length(Reduce(intersect, list(GeneList_BM10_PlaqueMean, GeneList_BM36_PlaqueMean, GeneList_BM44_PlaqueMean))), n234 = length(Reduce(intersect, list(GeneList_BM22_PlaqueMean, GeneList_BM36_PlaqueMean, GeneList_BM44_PlaqueMean))), n1234 = length(Reduce(intersect, list(GeneList_BM10_PlaqueMean,
```

```

GeneList_BM22_PlaqueMean, GeneList_BM36_PlaqueMean, GeneList_BM44_PlaqueMean))), category
= c("BM10", "BM22", "BM36", "BM44"), lty = "blank",
  cex = 1.5,
  fontface = "bold",
  fontfamily = "sans",
  cat.cex = 1.2,
  cat.fontface = "bold",
  cat.default.pos = "outer",
  fill = c("skyblue", "pink1", "mediumorchid", "green"))

```

```
#####
```

```
#####
#####
## Calculate overlap between Meta Analyses ##
#####
#####
```

```
###CDR
```

```
##Aggregate / intersect list of genes
```

```

GeneListMeta_CDR_BM10 <- subset(both_CDR_BM10, i_adjpv < 0.05)$Gene
GeneListMeta_CDR_BM22 <- subset(both_CDR_BM22, i_adjpv < 0.05)$Gene
GeneListMeta_CDR_BM36 <- subset(both_CDR_BM36, i_adjpv < 0.05)$Gene
GeneListMeta_CDR_BM44 <- subset(both_CDR_BM44, i_adjpv < 0.05)$Gene

```

```
grid.newpage()
```

```
#pushViewport(viewport(width=unit(0.8, "npc"), height = unit(0.8, "npc")))
```

```

venn_meta_CDR <- draw.quad.venn(area1 = length(GeneListMeta_CDR_BM10), area2 =
length(GeneListMeta_CDR_BM22), area3 = length(GeneListMeta_CDR_BM36), area4 =
length(GeneListMeta_CDR_BM44), n12 = length(intersect(GeneListMeta_CDR_BM10,
GeneListMeta_CDR_BM22)), n13 = length(intersect(GeneListMeta_CDR_BM10,
GeneListMeta_CDR_BM36)), n14 = length(intersect(GeneListMeta_CDR_BM10,
GeneListMeta_CDR_BM44)), n23 = length(intersect(GeneListMeta_CDR_BM22,
GeneListMeta_CDR_BM36)), n24 = length(intersect(GeneListMeta_CDR_BM22,
GeneListMeta_CDR_BM44)), n34 = length(intersect(GeneListMeta_CDR_BM36,
GeneListMeta_CDR_BM44)),

```

```

  n123 = length(Reduce(intersect, list(GeneListMeta_CDR_BM10, GeneListMeta_CDR_BM22,
GeneListMeta_CDR_BM36))), n124 = length(Reduce(intersect, list(GeneListMeta_CDR_BM10,
GeneListMeta_CDR_BM22, GeneListMeta_CDR_BM44))), n134 = length(Reduce(intersect,

```

```
list(GeneListMeta_CDR_BM10, GeneListMeta_CDR_BM36, GeneListMeta_CDR_BM44))), n234 =
length(Reduce(intersect, list(GeneListMeta_CDR_BM22, GeneListMeta_CDR_BM36,
GeneListMeta_CDR_BM44))), n1234 = length(Reduce(intersect, list(GeneListMeta_CDR_BM10,
GeneListMeta_CDR_BM22, GeneListMeta_CDR_BM36, GeneListMeta_CDR_BM44))), category =
c("Meta\nPCtx-BM10", "Meta\nPCtx-BM22", "Meta\nPCtx-BM36", "Meta\nPCtx-BM44"), lty = "blank",
  cex = 1,
  fontface = "bold",
  fontfamily = "sans",
  cat.cex = 0.8,
  cat.pos=0,
  cat.fontface = "bold",
  cat.default.pos = "outer",
  fill = c("skyblue", "pink1", "mediumorchid", "green"))
```

```
###braak
```

```
##Aggregate / intersect list of genes
```

```
GeneListMeta_braak_BM10 <- subset(both_braak_BM10, i_adjpv < 0.05)$Gene
```

```
GeneListMeta_braak_BM22 <- subset(both_braak_BM22, i_adjpv < 0.05)$Gene
```

```
GeneListMeta_braak_BM36 <- subset(both_braak_BM36, i_adjpv < 0.05)$Gene
```

```
GeneListMeta_braak_BM44 <- subset(both_braak_BM44, i_adjpv < 0.05)$Gene
```

```
grid.newpage()
```

```
#pushViewport(viewport(width=unit(0.8, "npc"), height = unit(0.8, "npc")))
```

```
venn_meta_braak <- draw.quad.venn(area1 = length(GeneListMeta_braak_BM10), area2 =
```

```
length(GeneListMeta_braak_BM22), area3 = length(GeneListMeta_braak_BM36), area4 =
```

```
length(GeneListMeta_braak_BM44), n12 = length(intersect(GeneListMeta_braak_BM10,
```

```
GeneListMeta_braak_BM22)), n13 = length(intersect(GeneListMeta_braak_BM10,
```

```
GeneListMeta_braak_BM36)), n14 = length(intersect(GeneListMeta_braak_BM10,
```

```
GeneListMeta_braak_BM44)), n23 = length(intersect(GeneListMeta_braak_BM22,
```

```
GeneListMeta_braak_BM36)), n24 = length(intersect(GeneListMeta_braak_BM22,
```

```
GeneListMeta_braak_BM44)), n34 = length(intersect(GeneListMeta_braak_BM36,
```

```
GeneListMeta_braak_BM44)),
```

```
  n123 = length(Reduce(intersect, list(GeneListMeta_braak_BM10, GeneListMeta_braak_BM22,
```

```
GeneListMeta_braak_BM36))), n124 = length(Reduce(intersect, list(GeneListMeta_braak_BM10,
```

```
GeneListMeta_braak_BM22, GeneListMeta_braak_BM44))), n134 = length(Reduce(intersect,
```

```
list(GeneListMeta_braak_BM10, GeneListMeta_braak_BM36, GeneListMeta_braak_BM44))), n234 =
```

```
length(Reduce(intersect, list(GeneListMeta_braak_BM22, GeneListMeta_braak_BM36,
```

```
GeneListMeta_braak_BM44))), n1234 = length(Reduce(intersect, list(GeneListMeta_braak_BM10,
```

```
GeneListMeta_braak_BM22, GeneListMeta_braak_BM36, GeneListMeta_braak_BM44))), category =
```

```
c("Meta\nPCtx-BM10", "Meta\nPCtx-BM22", "Meta\nPCtx-BM36", "Meta\nPCtx-BM44"), lty = "blank",
```

```
  cex = 1,
```

```
  fontface = "bold",
```

```

fontfamily = "sans",
cat.cex = 0.8,
cat.pos=0,
cat.fontface = "bold",
cat.default.pos = "outer",
fill = c("skyblue", "pink1", "mediumorchid", "green")

###condition

##Aggregate / intersect list of genes
GeneListMeta_condition_BM10 <- subset(both_condition_BM10, i_adjpv < 0.05)$Gene
GeneListMeta_condition_BM22 <- subset(both_condition_BM22, i_adjpv < 0.05)$Gene
GeneListMeta_condition_BM36 <- subset(both_condition_BM36, i_adjpv < 0.05)$Gene
GeneListMeta_condition_BM44 <- subset(both_condition_BM44, i_adjpv < 0.05)$Gene

grid.newpage()
#pushViewport(viewport(width=unit(0.8, "npc"), height = unit(0.8, "npc")))
venn_meta_condition <- draw.quad.venn(area1 = length(GeneListMeta_condition_BM10), area2 =
length(GeneListMeta_condition_BM22), area3 = length(GeneListMeta_condition_BM36), area4 =
length(GeneListMeta_condition_BM44), n12 = length(intersect(GeneListMeta_condition_BM10,
GeneListMeta_condition_BM22)), n13 = length(intersect(GeneListMeta_condition_BM10,
GeneListMeta_condition_BM36)), n14 = length(intersect(GeneListMeta_condition_BM10,
GeneListMeta_condition_BM44)), n23 = length(intersect(GeneListMeta_condition_BM22,
GeneListMeta_condition_BM36)), n24 = length(intersect(GeneListMeta_condition_BM22,
GeneListMeta_condition_BM44)), n34 = length(intersect(GeneListMeta_condition_BM36,
GeneListMeta_condition_BM44)),
n123 = length(Reduce(intersect, list(GeneListMeta_condition_BM10, GeneListMeta_condition_BM22,
GeneListMeta_condition_BM36))), n124 = length(Reduce(intersect, list(GeneListMeta_condition_BM10,
GeneListMeta_condition_BM22, GeneListMeta_condition_BM44))), n134 = length(Reduce(intersect,
list(GeneListMeta_condition_BM10, GeneListMeta_condition_BM36, GeneListMeta_condition_BM44))),
n234 = length(Reduce(intersect, list(GeneListMeta_condition_BM22, GeneListMeta_condition_BM36,
GeneListMeta_condition_BM44))), n1234 = length(Reduce(intersect,
list(GeneListMeta_condition_BM10, GeneListMeta_condition_BM22, GeneListMeta_condition_BM36,
GeneListMeta_condition_BM44))), category = c("Meta\nPCtx-BM10", "Meta\nPCtx-BM22",
"Meta\nPCtx-BM36", "Meta\nPCtx-BM44"), lty = "blank",
cex = 1,
fontface = "bold",
fontfamily = "sans",
cat.cex = 0.8,
cat.pos=0,
cat.fontface = "bold",
cat.default.pos = "outer",
fill = c("skyblue", "pink1", "mediumorchid", "green"))

```

```

require(gridExtra)
venn_meta_condition_title <- grid.arrange(gTree(children=venn_meta_condition), ncol=1,
top=textGrob("AD Case", gp=gpar(fontface="bold")))
venn_meta_CDR_title <- grid.arrange(gTree(children=venn_meta_CDR), ncol=1, top=textGrob("CDR",
gp=gpar(fontface="bold")))
venn_meta_braak_title <- grid.arrange(gTree(children=venn_meta_braak), ncol=1, top=textGrob("Braak
Score", gp=gpar(fontface="bold")))

require(cowplot)
plot_grid(venn_meta_CDR_title,venn_meta_braak_title,venn_meta_condition_title, align = "v", nrow
=3, labels=c('A','B','C'))

require(cowplot)
plot_grid(gTree(children=venn_meta_condition),gTree(children=venn_meta_CDR),gTree(children=venn
_meta_braak), align = "v", nrow =3)

##BM44 Meta analyses
#Join the meta-analysis results together into a set

meta_condition_overlap <- list(GeneListMeta_condition_BM44, GeneListMeta_CDR_BM44,
GeneListMeta_braak_BM44)

length.gene.sets=sapply(meta_condition_overlap,length)

total=nrow(both_condition_BM44)

(num.expcted.overlap=total*do.call(prod,as.list(length.gene.sets/total)))

(p=sapply(0:min(length.gene.sets),function(i) dpsets(i, length.gene.sets, n=total)))

common.genes=intersect(meta_condition_overlap[[1]], meta_condition_overlap[[2]],
meta_condition_overlap[[3]])
(num.observed.overlap=length(common.genes))

(FE=num.observed.overlap/num.expcted.overlap)

dpsets(num.observed.overlap, length.gene.sets, n=total)

```

```

####Test for significance of overlap ##

library("SuperExactTest")

##CDR
#Join the meta-analysis results together into a set

meta_CDR_overlap <- list(GeneListMeta_CDR_BM10, GeneListMeta_CDR_BM22,
GeneListMeta_CDR_BM36, GeneListMeta_CDR_BM44)

length.gene.sets=sapply(meta_CDR_overlap,length)

total=nrow(both_CDR_BM44)

(num.expcted.overlap=total*do.call(prod,as.list(length.gene.sets/total)))

(p=sapply(0:min(length.gene.sets),function(i) dpsets(i, length.gene.sets, n=total)))

common.genes=intersect(meta_CDR_overlap[[1]], meta_CDR_overlap[[2]], meta_CDR_overlap[[3]],
meta_CDR_overlap[[4]])
(num.observed.overlap=length(common.genes))

(FE=num.observed.overlap/num.expcted.overlap)

dpsets(num.observed.overlap, length.gene.sets, n=total)

##braak
#Join the meta-analysis results together into a set

meta_braak_overlap <- list(GeneListMeta_braak_BM10, GeneListMeta_braak_BM22,
GeneListMeta_braak_BM36, GeneListMeta_braak_BM44)

length.gene.sets=sapply(meta_braak_overlap,length)

total=nrow(both_braak_BM44)

(num.expcted.overlap=total*do.call(prod,as.list(length.gene.sets/total)))

(p=sapply(0:min(length.gene.sets),function(i) dpsets(i, length.gene.sets, n=total)))

common.genes=intersect(meta_braak_overlap[[1]], meta_braak_overlap[[2]], meta_braak_overlap[[3]],
meta_braak_overlap[[4]])

```

```

(num.observed.overlap=length(common.genes))

(FE=num.observed.overlap/num.expcted.overlap)

dpsets(num.observed.overlap, length.gene.sets, n=total)

##condition
#Join the meta-analysis results together into a set

meta_condition_overlap <- list(GeneListMeta_condition_BM10, GeneListMeta_condition_BM22,
GeneListMeta_condition_BM36, GeneListMeta_condition_BM44)

length.gene.sets=sapply(meta_condition_overlap,length)

total=nrow(both_condition_BM44)

(num.expcted.overlap=total*do.call(prod,as.list(length.gene.sets/total)))

(p=sapply(0:min(length.gene.sets),function(i) dpsets(i, length.gene.sets, n=total)))

common.genes=intersect(meta_condition_overlap[[1]], meta_condition_overlap[[2]],
meta_condition_overlap[[3]],
meta_condition_overlap[[4]])
(num.observed.overlap=length(common.genes))

(FE=num.observed.overlap/num.expcted.overlap)

dpsets(num.observed.overlap, length.gene.sets, n=total)

###Calculate number with various levels of significance##

#sum(both_CDR_BM44[rownames(subset(res_BM44_CDR_filter[GeneList_parietal_CDR,], pvalue <
0.05)),]$i_rawpval < 5e-8)

sum(both_CDR_BM44[rownames(subset(res_BM44_CDR_filter[GeneList_parietal_CDR,], pvalue <
0.05)),]$i_rawpval < 5e-6)

##Same sign for meta analysis overlap?

#Same direction of effect?

```

```
GeneListMeta_CDR_MSBB <- Reduce(intersect, list(GeneListMeta_CDR_BM10,
GeneListMeta_CDR_BM22, GeneListMeta_CDR_BM36, GeneListMeta_CDR_BM44))
```

```
sign(res_BM22_CDR_filter[GeneListMeta_CDR_MSBB,]$log2FoldChange)
sign(res_BM36_CDR_filter[GeneListMeta_CDR_MSBB,]$log2FoldChange)
sign(res_BM44_CDR_filter[GeneListMeta_CDR_MSBB,]$log2FoldChange)
```

```
sum(sign(res_parietal_CDR_filter[rownames(subset(res_BM44_CDR_filter[GeneList_parietal_CDR,],
pvalue < 0.05)),]$log2FoldChange) == sign(subset(res_BM44_CDR_filter[GeneList_parietal_CDR,], pvalue
< 0.05)$log2FoldChange))
```

```
#####
#####
## Calculate overlap between ADAD and Meta ##
#####
#####
```

```
###Condition
```

```
##Aggregate / intersect list of genes
```

```
#GeneList_parietal_LOADvsCO_meta <- unique(c(rownames(subset(res_parietal_condition_filter, padj <
0.05)), rownames(subset(res_parietal_braak_filter, padj < 0.05)),
rownames(subset(res_parietal_CDR_filter, padj < 0.05))))
```

```
GeneList_parietal_LOADvsCO_meta <- GeneListMeta_condition_BM44
```

```
GeneList_parietal_ADADvsCO <- rownames(subset(res_parietalADAD_condition_filter_ADADvsCO, padj
< 0.05))
```

```
GeneList_parietal_ADADvsLOAD <-
```

```
rownames(subset(res_parietalADAD_conditionBraak_filter_ADADvsLOAD, padj < 0.05))
```

```
grid.newpage()
```

```
pushViewport(viewport(width=unit(0.8, "npc"), height = unit(0.8, "npc")))
```

```
draw.triple.venn(area1 = length(GeneList_parietal_LOADvsCO_meta), area2 =
length(GeneList_parietal_ADADvsLOAD), area3 = length(GeneList_parietal_ADADvsCO), n12 =
length(intersect(GeneList_parietal_LOADvsCO_meta, GeneList_parietal_ADADvsLOAD)), n23 =
length(intersect(GeneList_parietal_ADADvsLOAD, GeneList_parietal_ADADvsCO)), n13 =
length(intersect(GeneList_parietal_LOADvsCO_meta, GeneList_parietal_ADADvsCO)),
```



```

n123 = length(Reduce(intersect, list(GeneList_parietal_LOADvsCO_meta,
GeneList_parietal_ADADvsLOAD, GeneList_parietal_ADADvsCO))), category = c("LOADvsCO",
"ADADvsLOAD", "ADADvsCO"), lty = "blank",
  cex = 1.5,
  fontface = "bold",
  fontfamily = "sans",
  cat.cex = 1.5,
  cat.fontface = "bold",
  cat.default.pos = "outer",
  fill = c("skyblue", "pink1", "mediumorchid"))

```

```

#####
#####
## Calculate overlap between BM44 Meta ##
#####
#####

```

```

GeneListMeta_condition_BM44_sigOnly <-
rownames(subset(both_condition_BM44[GeneListMeta_condition_BM44,], i_rawpval < 5e-6))
GeneListMeta_CDR_BM44_sigOnly <- rownames(subset(both_CDR_BM44[GeneListMeta_CDR_BM44,],
i_rawpval < 5e-6))
GeneListMeta_braak_BM44_sigOnly <-
rownames(subset(both_braak_BM44[GeneListMeta_braak_BM44,], i_rawpval < 5e-6))

```

```

length(Reduce(intersect, list(GeneListMeta_braak_BM44_sigOnly, GeneListMeta_CDR_BM44_sigOnly,
GeneListMeta_condition_BM44_sigOnly)))

```

```

length(Reduce(intersect, list(GeneListMeta_braak_BM44, GeneListMeta_CDR_BM44,
GeneListMeta_condition_BM44)))

```

```

#Total number:
unique(c(GeneListMeta_CDR_BM44, GeneListMeta_braak_BM44, GeneListMeta_condition_BM44))

```

```

grid.newpage()
pushViewport(viewport(width=unit(0.8, "npc"), height = unit(0.8, "npc")))
draw.triple.venn(area1 = length(GeneListMeta_CDR_BM44), area2 =
length(GeneListMeta_braak_BM44), area3 = length(GeneListMeta_condition_BM44), n12 =
length(intersect(GeneListMeta_CDR_BM44, GeneListMeta_braak_BM44)), n23 =
length(intersect(GeneListMeta_braak_BM44, GeneListMeta_condition_BM44)), n13 =
length(intersect(GeneListMeta_CDR_BM44, GeneListMeta_condition_BM44)),

```

```

n123 = length(Reduce(intersect, list(GeneListMeta_CDR_BM44, GeneListMeta_braak_BM44,
GeneListMeta_condition_BM44))), category = c("CDR", "Braak", "Case"), lty = "blank",
      cex = 1.5,
      fontface = "bold",
      fontfamily = "sans",
      cat.cex = 1.5,
      cat.fontface = "bold",
      cat.default.pos = "outer",
      fill = c("skyblue", "pink1", "mediumorchid"))

```

```
##BM44 Meta analyses
```

```
#Join the meta-analysis results together into a set
```

```
meta_condition_overlap <- list(GeneListMeta_condition_BM44, GeneListMeta_CDR_BM44,
GeneListMeta_braak_BM44)
```

```
length.gene.sets=sapply(meta_condition_overlap,length)
```

```
total=nrow(both_condition_BM44)
```

```
(num.expcted.overlap=total*do.call(prod,as.list(length.gene.sets/total)))
```

```
(p=sapply(0:min(length.gene.sets),function(i) dpsets(i, length.gene.sets, n=total)))
```

```
common.genes=intersect(meta_condition_overlap[[1]], meta_condition_overlap[[2]],
meta_condition_overlap[[3]])
```

```
(num.observed.overlap=length(common.genes))
```

```
(FE=num.observed.overlap/num.expcted.overlap)
```

```
dpsets(num.observed.overlap, length.gene.sets, n=total)
```

```
#####
```

```
#####
```

```
## Numbers for the paper ##
```

```
#####
```

```
#####
```

```
summary(res_parietal_CDR_filter)
```

```
summary(res_parietal_braak_filter)
```

```
summary(res_parietal_condition_filter)
```

```
res_parietal_CDR_filter["circHOMER1",]
res_parietal_CDR_filter["circCDR1-AS",]
res_parietal_condition_filter["circHOMER1",]
res_parietal_CDR_filter["circHOMER1",]
```

```
summary(res_BM44_CDR_filter)
summary(res_BM44_braak_filter)
summary(res_BM44_condition_filter)
summary(res_BM44_PlaqueMean_filter)
```

```
res_BM44_CDR_filter["circHOMER1",]
res_BM44_braak_filter["circHOMER1",]
res_BM44_condition_filter["circHOMER1",]
res_BM44_PlaqueMean_filter["circHOMER1",]
```

```
nrow(subset(both_CDR_BM44, i_adjpv < 0.05))
nrow(subset(both_CDR_BM44, i_rawpv < 5e-6))
nrow(subset(both_CDR_BM44, i_rawpv < 5e-8))
```

```
nrow(subset(both_braak_BM44, i_adjpv < 0.05))
nrow(subset(both_braak_BM44, i_rawpv < 5e-6))
nrow(subset(both_braak_BM44, i_rawpv < 5e-8))
```

```
nrow(subset(both_condition_BM44, i_adjpv < 0.05))
nrow(subset(both_condition_BM44, i_rawpv < 5e-6))
nrow(subset(both_condition_BM44, i_rawpv < 5e-8))
```

```
#####
```

```
#####
#####
## Calculate Parietal and MSBB ALL Overlap Overall ##
#####
#####
```

```
##CDR
```

```
GeneList_MSBB_CDR <- Reduce(intersect, list(rownames(subset(res_BM10_CDR_filter, padj < 0.05)),
rownames(subset(res_BM22_CDR_filter, padj < 0.05)), rownames(subset(res_BM36_CDR_filter, padj <
0.05)), rownames(subset(res_BM44_CDR_filter, padj < 0.05))))
```

```

grid.newpage()
pushViewport(viewport(width=unit(0.8, "npc"), height = unit(0.8, "npc")))
draw.pairwise.venn(area1 = length(GeneList_parietal_CDR), area2 = length(GeneList_MSBB_CDR),
cross.area = length(intersect(GeneList_parietal_CDR, GeneList_MSBB_CDR)), category = c("Parietal \n
Discovery", "All MSBB \n Replication"), lty = "blank", cex = 1.5, fontface = "bold", fontfamily = "sans",
cat.cex = 1.2, cat.fontface = "bold", cat.default.pos = "outer", fill = c("skyblue", "pink1"))

##braak

GeneList_MSBB_braak <- Reduce(intersect, list(rownames(subset(res_BM10_braak_filter, padj < 0.05)),
rownames(subset(res_BM22_braak_filter, padj < 0.05)), rownames(subset(res_BM36_braak_filter, padj
< 0.05)), rownames(subset(res_BM44_braak_filter, padj < 0.05))))

grid.newpage()
pushViewport(viewport(width=unit(0.8, "npc"), height = unit(0.8, "npc")))
draw.pairwise.venn(area1 = length(GeneList_parietal_braak), area2 = length(GeneList_MSBB_braak),
cross.area = length(intersect(GeneList_parietal_braak, GeneList_MSBB_braak)), category = c("Parietal \n
Discovery", "All MSBB \n Replication"), lty = "blank", cex = 1.5, fontface = "bold", fontfamily = "sans",
cat.cex = 1.2, cat.fontface = "bold", cat.default.pos = "outer", fill = c("skyblue", "pink1"))

#####
#####
## Phenotype Correlations ##
#####
#####

library(corrplot)

#Parietal Covar Processing
dds_parietal_covar_filter <- dds_parietal_final_CDR_filter
dds_parietal_covar_filter <- dds_parietal_covar_filter[ ,!is.na(dds_parietal_covar_filter$braak_final) ]

#BM10 Covar Processing
dds_BM10_covar_filter <- dds_BM10_final_condition_filter
dds_BM10_covar_filter <- dds_BM10_covar_filter[ ,!is.na(dds_BM10_covar_filter$bbbscore) ]
dds_BM10_covar_filter <- dds_BM10_covar_filter[ ,!is.na(dds_BM10_covar_filter$CDR) ]
dds_BM10_covar_filter <- dds_BM10_covar_filter[ ,dds_BM10_covar_filter$NP.1 != "3" ]
dds_BM10_covar_filter <- dds_BM10_covar_filter[ ,dds_BM10_covar_filter$NP.1 != "4" ]
dds_BM10_covar_filter$NP.1 <- droplevels(dds_BM10_covar_filter$NP.1)

#BM22 Covar Processing

```

```

dds_BM22_covar_filter <- dds_BM22_final_condition_filter
dds_BM22_covar_filter <- dds_BM22_covar_filter[ ,!is.na(dds_BM22_covar_filter$bbbscore) ]
dds_BM22_covar_filter <- dds_BM22_covar_filter[ ,!is.na(dds_BM22_covar_filter$CDR) ]
dds_BM22_covar_filter <- dds_BM22_covar_filter[ ,dds_BM22_covar_filter$NP.1 != "3" ]
dds_BM22_covar_filter <- dds_BM22_covar_filter[ ,dds_BM22_covar_filter$NP.1 != "4" ]
dds_BM22_covar_filter$NP.1 <- droplevels(dds_BM22_covar_filter$NP.1)

#BM36 Covar Processing
dds_BM36_covar_filter <- dds_BM36_final_condition_filter
dds_BM36_covar_filter <- dds_BM36_covar_filter[ ,!is.na(dds_BM36_covar_filter$bbbscore) ]
dds_BM36_covar_filter <- dds_BM36_covar_filter[ ,!is.na(dds_BM36_covar_filter$CDR) ]
dds_BM36_covar_filter <- dds_BM36_covar_filter[ ,dds_BM36_covar_filter$NP.1 != "3" ]
dds_BM36_covar_filter <- dds_BM36_covar_filter[ ,dds_BM36_covar_filter$NP.1 != "4" ]
dds_BM36_covar_filter$NP.1 <- droplevels(dds_BM36_covar_filter$NP.1)

#BM44 Covar Processing
dds_BM44_covar_filter <- dds_BM44_final_condition_filter
dds_BM44_covar_filter <- dds_BM44_covar_filter[ ,!is.na(dds_BM44_covar_filter$bbbscore) ]
dds_BM44_covar_filter <- dds_BM44_covar_filter[ ,!is.na(dds_BM44_covar_filter$CDR) ]
dds_BM44_covar_filter <- dds_BM44_covar_filter[ ,dds_BM44_covar_filter$NP.1 != "3" ]
dds_BM44_covar_filter <- dds_BM44_covar_filter[ ,dds_BM44_covar_filter$NP.1 != "4" ]
dds_BM44_covar_filter$NP.1 <- droplevels(dds_BM44_covar_filter$NP.1)

library(corrplot)

par(mfrow=c(2,3))
corr_BM22 <- cbind(CDR = dds_BM22_covar_filter$CDR, Braak = dds_BM22_covar_filter$bbbscore,
AD_Case = as.integer(dds_BM22_covar_filter$NP.1))
corrplot::corrplot(cor(corr_BM22), method = "number", type = "lower", mar=c(0,0,2,0), number.cex =
1.2, tl.cex = 1.2, cl.lim = c(0.6,1), cl.pos="n")
mtext("BM22", at=2.0, line=-0.5, cex=1.3)
corr_BM10 <- cbind(CDR = dds_BM10_covar_filter$CDR, Braak = dds_BM10_covar_filter$bbbscore,
AD_Case = as.integer(dds_BM10_covar_filter$NP.1))
corrplot::corrplot(cor(corr_BM10), method = "number", type = "lower", mar=c(0,0,2,0), number.cex =
1.2, tl.cex = 1.2, cl.lim = c(0.6,1), cl.pos="n")
mtext("BM10", at=2.0, line=-0.5, cex=1.3)
corr_BM36 <- cbind(CDR = dds_BM36_covar_filter$CDR, Braak = dds_BM36_covar_filter$bbbscore,
AD_Case = as.integer(dds_BM36_covar_filter$NP.1))
corrplot::corrplot(cor(corr_BM36), method = "number", type = "lower", mar=c(0,0,2,0), number.cex =
1.2, tl.cex = 1.2, cl.lim = c(0.6,1), cl.pos="n")
mtext("BM36", at=2.0, line=-0.5, cex=1.3)
corr_BM44 <- cbind(CDR = dds_BM44_covar_filter$CDR, Braak = dds_BM44_covar_filter$bbbscore,
AD_Case = as.integer(dds_BM44_covar_filter$NP.1))

```

```

corrplot::corrplot(cor(corr_BM44), method = "number", type = "lower", mar=c(0,0,2,0), number.cex =
1.2, tl.cex = 1.2, cl.lim = c(0.6,1), cl.pos="n")
mtext("BM44", at=2.0, line=-0.5, cex=1.3)
corr_parietal <- cbind(CDR = dds_parietal_covar_filter$CDR_e, Braak =
dds_parietal_covar_filter$braak_final, AD_Case = as.integer(dds_parietal_covar_filter$condition))
corrplot::corrplot(cor(corr_parietal), method = "number", type = "lower", mar=c(0,0,2,0), number.cex =
1.2, tl.cex = 1.2, cl.lim = c(0.6,1), cl.pos="n")
mtext("PCtx", at=2.0, line=-0.5, cex=1.3)
par(mfrow=c(1,1))

```

##Corr Plots with Astrocyte and Neuron percentages

```

par(mfrow=c(2,3))
corr_BM22 <- cbind(CDR = dds_BM22_covar_filter$CDR, Braak = dds_BM22_covar_filter$bbbscore,
Condition = as.integer(dds_BM22_covar_filter$NP.1), Neuron = dds_BM22_covar_filter$Neuron ,
Astrocyte = dds_BM22_covar_filter$Astrocyte, PlaqueMean = dds_BM22_covar_filter$PlaqueMean)
corrplot::corrplot(cor(corr_BM22), method = "number", type = "lower", mar=c(0,0,2,0), number.cex =
1.2)
mtext("BM22", at=2.0, line=-0.5, cex=1)
corr_BM10 <- cbind(CDR = dds_BM10_covar_filter$CDR, Braak = dds_BM10_covar_filter$bbbscore,
Condition = as.integer(dds_BM10_covar_filter$NP.1), Neuron = dds_BM10_covar_filter$Neuron ,
Astrocyte = dds_BM10_covar_filter$Astrocyte, PlaqueMean = dds_BM10_covar_filter$PlaqueMean)
corrplot::corrplot(cor(corr_BM10), method = "number", type = "lower", mar=c(0,0,2,0), number.cex =
1.2)
mtext("BM10", at=2.0, line=-0.5, cex=1)
corr_BM36 <- cbind(CDR = dds_BM36_covar_filter$CDR, Braak = dds_BM36_covar_filter$bbbscore,
Condition = as.integer(dds_BM36_covar_filter$NP.1), Neuron = dds_BM36_covar_filter$Neuron ,
Astrocyte = dds_BM36_covar_filter$Astrocyte, PlaqueMean = dds_BM36_covar_filter$PlaqueMean)
corrplot::corrplot(cor(corr_BM36), method = "number", type = "lower", mar=c(0,0,2,0), number.cex =
1.2)
mtext("BM36", at=2.0, line=-0.5, cex=1)
corr_BM44 <- cbind(CDR = dds_BM44_covar_filter$CDR, Braak = dds_BM44_covar_filter$bbbscore,
Condition = as.integer(dds_BM44_covar_filter$NP.1), Neuron = dds_BM44_covar_filter$Neuron ,
Astrocyte = dds_BM44_covar_filter$Astrocyte, PlaqueMean = dds_BM44_covar_filter$PlaqueMean)
corrplot::corrplot(cor(corr_BM44), method = "number", type = "lower", mar=c(0,0,2,0), number.cex =
1.2)
mtext("BM44", at=2.0, line=-0.5, cex=1)
corr_parietal <- cbind(CDR = dds_parietal_covar_filter$CDR_e, Braak =
dds_parietal_covar_filter$braak_final, Condition = as.integer(dds_parietal_covar_filter$condition),
Neuron = dds_parietal_covar_filter$Neuron , Astrocyte = dds_parietal_covar_filter$Astrocyte)
corrplot::corrplot(cor(corr_parietal), method = "number", type = "lower", mar=c(0,0,2,0), number.cex =
1.2)
mtext("Parietal", at=2.0, line=-0.5, cex=1)
par(mfrow=c(1,1))

```

```
#####  
#####Final numbers for the paper#####  
#####
```

```
#parietal dataset participants  
table(dds_parietal_condition_filter$condition)
```

```
#BM44 dataset participants  
table(dds_BM44_condition_filter$condition)
```

```
#CDR  
sum(table(dds_BM44_CDR_filter$condition))
```

```
#bbbscore  
sum(table(dds_BM44_braak_filter$condition))
```

```
#BM10 dataset participants  
table(dds_BM10_condition_filter$condition)
```

```
#CDR  
sum(table(dds_BM10_CDR_filter$condition))
```

```
#bbbscore  
sum(table(dds_BM10_braak_filter$condition))
```

```
#BM22 dataset participants  
table(dds_BM22_condition_filter$condition)
```

```
#CDR  
sum(table(dds_BM22_CDR_filter$condition))
```

```
#bbbscore  
sum(table(dds_BM22_braak_filter$condition))
```

```
#BM36 dataset participants  
table(dds_BM36_condition_filter$condition)
```

```
#CDR  
sum(table(dds_BM36_CDR_filter$condition))
```

```
#bbbscore
```

```
sum(table(dds_BM36_braak_filter$condition))
```

```
#parietal - CDR
```

```
summary(res_parietal_CDR_filter)
```

```
res_parietal_CDR_filter["circHOMER1",]
```

```
res_parietal_CDR_filter["circCDR1-AS",]
```

```
#parietal - braak
```

```
summary(res_parietal_braak_filter)
```

```
res_parietal_braak_filter["circHOMER1",]
```

```
#parietal - condition
```

```
summary(res_parietal_condition_filter)
```

```
res_parietal_condition_filter["circHOMER1",]
```

```
#parietal - how many pass FDR all analyses
```

```
intersect(GeneList_parietal_condition, GeneList_parietal_CDR, GeneList_parietal_braak)
```

```
#parietal how many unique associations
```

```
unique(c(GeneList_parietal_condition, GeneList_parietal_CDR, GeneList_parietal_braak))
```

```
#Replication
```

```
#CDR
```

```
#Same direction of effect?
```

```
sum(sign(res_parietal_CDR_filter[rownames(subset(res_BM44_CDR_filter[GeneList_parietal_CDR,],  
pvalue < 0.05)),]$log2FoldChange) == sign(subset(res_BM44_CDR_filter[GeneList_parietal_CDR,], pvalue  
< 0.05)$log2FoldChange))
```

```
##Correlation of effect size
```

```
cor.test((res_parietal_CDR_filter[rownames(subset(res_BM44_CDR_filter[GeneList_parietal_CDR,],  
pvalue < 0.05)),]$log2FoldChange), (subset(res_BM44_CDR_filter[GeneList_parietal_CDR,], pvalue <  
0.05)$log2FoldChange))
```

```
#circHOMER1 example
```

```
res_BM44_CDR_filter["circHOMER1",]
```

```
##How many meta analysis
```



```

nrow(subset(both_CDR_BM44, i_adjpv < 0.05))

nrow(subset(both_CDR_BM44, i_rawpv < 5e-6))

both_CDR_BM44["circHOMER1",]
both_CDR_BM44["circCDR1-AS",]

#braak

#Same direction of effect?

sum(sign(res_parietal_braak_filter[rownames(subset(res_BM44_braak_filter[GeneList_parietal_braak,],
pvalue < 0.05)),]$log2FoldChange) == sign(subset(res_BM44_braak_filter[GeneList_parietal_braak,],
pvalue < 0.05)$log2FoldChange))

##Correlation of effect size
cor.test((res_parietal_braak_filter[rownames(subset(res_BM44_braak_filter[GeneList_parietal_braak,],
pvalue < 0.05)),]$log2FoldChange), (subset(res_BM44_braak_filter[GeneList_parietal_braak,], pvalue <
0.05)$log2FoldChange))

##How many meta analysis
nrow(subset(both_braak_BM44, i_adjpv < 0.05))

nrow(subset(both_braak_BM44, i_rawpv < 5e-6))

#condition

#Same direction of effect?

sum(sign(res_parietal_condition_filter[rownames(subset(res_BM44_condition_filter[GeneList_parietal_c
condition,], pvalue < 0.05)),]$log2FoldChange) ==
sign(subset(res_BM44_condition_filter[GeneList_parietal_condition,], pvalue < 0.05)$log2FoldChange))

##Correlation of effect size
cor.test((res_parietal_condition_filter[rownames(subset(res_BM44_condition_filter[GeneList_parietal_c
ondition,], pvalue < 0.05)),]$log2FoldChange),
(subset(res_BM44_condition_filter[GeneList_parietal_condition,], pvalue < 0.05)$log2FoldChange))

#circHOMER1 example
res_BM44_condition_filter["circHOMER1",]

```

```

##How many meta analysis
nrow(subset(both_condition_BM44, i_adjpv < 0.05))

nrow(subset(both_condition_BM44, i_rawpv < 5e-6))

##Overall meta
length(unique(c(GeneListMeta_CDR_BM44, GeneListMeta_braak_BM44, GeneListMeta_condition_BM44)))

##How many in all of them
length(Reduce(intersect,
list(GeneListMeta_CDR_BM44, GeneListMeta_braak_BM44, GeneListMeta_condition_BM44)))

Reduce(intersect,
list(GeneListMeta_CDR_BM44, GeneListMeta_braak_BM44, GeneListMeta_condition_BM44))

#How many in all of them are sig
length(Reduce(intersect,
list(GeneListMeta_CDR_BM44_sigOnly, GeneListMeta_braak_BM44_sigOnly, GeneListMeta_condition_BM44_sigOnly)))

Reduce(intersect,
list(GeneListMeta_CDR_BM44_sigOnly, GeneListMeta_braak_BM44_sigOnly, GeneListMeta_condition_BM44_sigOnly))

###Meta-analysis overlap

#CDR
length(Reduce(intersect,
list(GeneListMeta_CDR_BM44, GeneListMeta_CDR_BM10, GeneListMeta_CDR_BM22, GeneListMeta_CDR_BM36)))

#Join the meta-analysis results together into a set

meta_CDR_overlap <- list(GeneListMeta_CDR_BM10, GeneListMeta_CDR_BM22,
GeneListMeta_CDR_BM36, GeneListMeta_CDR_BM44)

length.gene.sets=sapply(meta_CDR_overlap, length)

total=nrow(both_CDR_BM44)

(num.expcted.overlap=total*do.call(prod, as.list(length.gene.sets/total)))

```

```

(p=sapply(0:min(length.gene.sets),function(i) dpsets(i, length.gene.sets, n=total)))

common.genes=intersect(meta_CDR_overlap[[1]], meta_CDR_overlap[[2]], meta_CDR_overlap[[3]],
meta_CDR_overlap[[4]])
(num.observed.overlap=length(common.genes))

(FE=num.observed.overlap/num.expcted.overlap)

dpsets(num.observed.overlap, length.gene.sets, n=total)

#braak
length(Reduce(intersect,
list(GeneListMeta_braak_BM44,GeneListMeta_braak_BM10,GeneListMeta_braak_BM22,GeneListMeta
_braak_BM36)))

#Join the meta-analysis results together into a set

meta_braak_overlap <- list(GeneListMeta_braak_BM10, GeneListMeta_braak_BM22,
GeneListMeta_braak_BM36, GeneListMeta_braak_BM44)

length.gene.sets=sapply(meta_braak_overlap,length)

total=nrow(both_braak_BM44)

(num.expcted.overlap=total*do.call(prod,as.list(length.gene.sets/total)))

(p=sapply(0:min(length.gene.sets),function(i) dpsets(i, length.gene.sets, n=total)))

common.genes=intersect(meta_braak_overlap[[1]], meta_braak_overlap[[2]], meta_braak_overlap[[3]],
meta_braak_overlap[[4]])
(num.observed.overlap=length(common.genes))

(FE=num.observed.overlap/num.expcted.overlap)

dpsets(num.observed.overlap, length.gene.sets, n=total)

#condition
length(Reduce(intersect,
list(GeneListMeta_condition_BM44,GeneListMeta_condition_BM10,GeneListMeta_condition_BM22,Ge
neListMeta_condition_BM36)))

```

```

#Join the meta-analysis results together into a set

meta_condition_overlap <- list(GeneListMeta_condition_BM10, GeneListMeta_condition_BM22,
GeneListMeta_condition_BM36, GeneListMeta_condition_BM44)

length.gene.sets=sapply(meta_condition_overlap,length)

total=nrow(both_condition_BM44)

(num.expcted.overlap=total*do.call(prod,as.list(length.gene.sets/total)))

(p=sapply(0:min(length.gene.sets),function(i) dpsets(i, length.gene.sets, n=total)))

common.genes=intersect(meta_condition_overlap[[1]], meta_condition_overlap[[2]],
meta_condition_overlap[[3]],
meta_condition_overlap[[4]])
(num.observed.overlap=length(common.genes))

(FE=num.observed.overlap/num.expcted.overlap)

dpsets(num.observed.overlap, length.gene.sets, n=total)

###Cross-meta-analysis

GeneListMeta_CDR_MSBB <- Reduce(intersect, list(GeneListMeta_CDR_BM10,
GeneListMeta_CDR_BM22, GeneListMeta_CDR_BM36, GeneListMeta_CDR_BM44))

GeneListMeta_braak_MSBB <- Reduce(intersect, list(GeneListMeta_braak_BM10,
GeneListMeta_braak_BM22, GeneListMeta_braak_BM36, GeneListMeta_braak_BM44))

GeneListMeta_condition_MSBB <- Reduce(intersect, list(GeneListMeta_condition_BM10,
GeneListMeta_condition_BM22, GeneListMeta_condition_BM36, GeneListMeta_condition_BM44))

#all four meta-analyses, all three phenotypes
Reduce(intersect,list(GeneListMeta_CDR_MSBB, GeneListMeta_braak_MSBB, GeneListMeta_condition_
MSBB))

#all four meta-analyses, two quantitative
Reduce(intersect,list(GeneListMeta_CDR_MSBB, GeneListMeta_braak_MSBB))

###Pre-symptomatic
View(bootcorr_table_final)

```

```

##Number of presympAD - parietal
table(colData(dds_parietal_PreSymp_filter)$condition)

##Number of presympAD - BM44
table(colData(dds_BM44_PreSymp_filter)$NP.1)

##Number of nopresympAD - BM44
table(colData(dds_BM44_conditionNoPre_filter)$NP.1)

##Number of nopresympAD - parietal
table(colData(dds_parietal_conditionNoPre_filter)$condition)

##Number of background circs - parietal
nrow(Presymptomatic_parietal_notsig)

##Number of sig circs - parietal
nrow(Presymptomatic_parietal_sig)

ks.test(bootcorr_presymptom_parietal_notsig$t,bootcorr_presymptom_parietal_sig$t, alternative =
"greater")$p.value
ks.test(bootcorr_presymptom_BM44_notsig$t,bootcorr_presymptom_BM44_sig$t, alternative =
"greater")$p.value

##ADAD
summary(res_parietalADAD_condition_filter_ADADvsCO)

summary(summary(res_parietalADAD_condition_filter_braak6_ADADvsLOAD))

#Overlap
#same direction?
sum(OverlapADAD_CO_ADAD_LOAD[,3])

#Greater effect
sum(OverlapADAD_CO_ADAD_LOAD[,4])

##PropVar

summary(PropVar_parietal_CDR_Neuron_relimpo)

##cirCHOMER1 correlation

```

```

parietal_circHOMER1_corr_otherTop <- t(norm_parietal_CDR_counts[sigList_parietal_CDR_top,])
cor(parietal_circHOMER1_corr_otherTop)
summary(cor(parietal_circHOMER1_corr_otherTop)[1,2:ncol(parietal_circHOMER1_corr_otherTop)])

sum(PropVar_fullmodel_parietal_CDR_Neuron_relimpo[3:nrow(PropVar_fullmodel_parietal_CDR_Neuron_relimpo),])
summary(PropVar_fullmodel_parietal_CDR_Neuron_relimpo[3:nrow(PropVar_fullmodel_parietal_CDR_Neuron_relimpo),])

summary(PropVar_BM44_CDR_Neuron_relimpo)

sum(PropVar_fullmodel_BM44_CDR_Neuron_relimpo[3:nrow(PropVar_fullmodel_BM44_CDR_Neuron_relimpo),])
summary(PropVar_fullmodel_BM44_CDR_Neuron_relimpo[3:nrow(PropVar_fullmodel_BM44_CDR_Neuron_relimpo),])

#MeanPlaque

BM44
length(GeneList_BM44_PlaqueMean)
res_BM44_PlaqueMean_filter["circHOMER1",]

length(colData(dds_BM44_PlaqueMean_filter)$NP.1)

##Sample size in all plaque mean analyses
length(colData(dds_BM10_PlaqueMean_filter)$NP.1)
length(colData(dds_BM22_PlaqueMean_filter)$NP.1)
length(colData(dds_BM36_PlaqueMean_filter)$NP.1)
length(colData(dds_BM44_PlaqueMean_filter)$NP.1)

#How many in all 4 analyses

length(Reduce(intersect,list(GeneList_BM10_PlaqueMean,Genelist_BM22_PlaqueMean,Genelist_BM36_PlaqueMean,Genelist_BM44_PlaqueMean)))

##Number of individuals in the ROC analyses - parietal
table(coldata_parietal_normcounts$condition)

##Number of individuals in the ROC analyses - BM10
table(coldata_BM10_normcounts$condition)

##Number of individuals in the ROC analyses - BM22

```

```

table(coldata_BM22_normcounts$condition)

##Number of individuals in the ROC analyses - BM36
table(coldata_BM36_normcounts$condition)

##Number of individuals in the ROC analyses - BM44
table(coldata_BM44_normcounts$condition)

##AUC Values - parietal
ggroc(g_base_parietal, TITLE="Parietal Base")
ggroc(g_circ_parietal, TITLE="Parietal Circ")
ggroc(g_base_circ_parietal, TITLE="Parietal Base+Circ")

##AUC Values - BM44
ggroc(g_base_BM44, TITLE="BM44 Base")
ggroc(g_circ_BM44, TITLE="BM44 Circ")
ggroc(g_base_circ_BM44, TITLE="BM44 Base+Circ")

##MEGENA Numbers
length(unique(as.character(META_MEGENA_parietalCDR_sigOnly$Module)))

write.table(GeneListMeta_CDR_BM44,
"/home/dubeu/Synapse/NetworkAnalysis/GeneListMeta_CDR_BM44.txt")

...

```
